# Supplementary material
Source: publisher figshare collection journal article supplement (https://karger.figshare.com/articles/dataset/_/5128345)
Supplement: Supplementary file 1 [file 1]

Archive with 8 entries (8 files):
- 000435871_sm_Figures.PDF
- 000435871_sm_Figure_1.eps
- 000435871_sm_Figure_1.gif
- 000435871_sm_Figure_2.gif
- 000435871_sm_Figure_2.tif
- 000435871_sm_Figure_3.tif
- 000435871_sm_Information.PDF
- 000435871_sm_Legends.doc
