# Supplementary material
Source: publisher figshare collection journal article supplement (https://karger.figshare.com/articles/dataset/_/5128345)
Supplement: Supplementary file 1 [file 1 › 000435871_sm_Information.PDF]

>DOG SOX9 PROPOSED DESERT REGION

ACTGCTTCCTCCTCTGGAATATTGACTTTCAACTAACAGTCTGTTGGTCA  
AAGGCCCCAAGCAGTTATTTCAGACGACGGTACTGGTGAAGAGGTGGGTCA  
AGGCACGTGGCCACAAGGGACCGAGGCGAGTACGGTGGCGTCAAGAAAG  
GACTGTAAGCTCGGAGATTTAACCTTAGAGCACTCAACACGCCTCCTCTC  
CCCCCTCCCCACCCCATGACCCGATGGCACATACATGTGATAGAATAAG  
TTATGGGGTTTTTCTGTTTCGTTTTGTGTGTTTTACAAAACCTGAACTCG  
CAGGCCAGCCTCGGTTGGGTATTTGACGAATCCAGAATGCTTCTCCTTAG  
GGAACAAGAATGTTTTTAATGGCATAACAAAGGCAAGACTCTGCCTTAAT  
TTTTTTTGAAAAGCTGCTAACTACATGAACACAAATTGTATTTTTGTTC  
CGTGTAGTTCTTCTTTTCGTGTAATTTAAAAGTCAGTGTTGAACTTTGTTG  
AAAGCTCATGATATGTGCTTCAAAGTGGCAAGTATTTGGCTATTAAGCTG  
CCAAAACGAGAGCCTGATTTTTTGGAGGCCAGTAATTTGTTTGCTAGAATT  
GATTTTTTTTTTCTCTCTCTCTCTCTCTCTCTCTCTCTCTCTCTTTGG  
TTACATAAGGGCATTATGTAACACTAGCCAAATGGTAGCCTCTGGGTTTT  
CTTTTTTTTTTTTTTCTTCCATGATGTTAATGGGTTATCTCAAATTTTAA  
GTTAGACTACCTAAAATAAAATACCAAAGATAATGCACATTTTTGCACAGT  
GGAGCTTATACTAAAAGGATAGAAAAGCCCCACGGCTGCCTTGAAATCAA  
GAAACAGTAACTTTGAACCTCAGCAAGACCTTGAAGTGCCTCTCCTTTT  
TTCACCTTATTCAGAAAATAGAATATCCTCCGCAGAGTATAGTAAGTGTC  
GTGCTTTTTCAGTTTTGCTCTTTCATGCAACTAGTGTATGATGAGAGGAA  
GAAGAAAGGGGAAGGAAAATTCACACACACACAATCAAAATATCCTTTCT  
TTCTGTGAGGTTGGGCTGGCCAGGCCGACGCATAAGGTGAGAGATGGTG  
ACGGGCTCTTAGATTTTTCTGGCTCTCCCCTTTGGGCGCCTTCCAGGATT  
TATTCATAAGATAAGACCTAGGTTGGAGTTAGTTGGCATCCCCAAAAGC  
TGAGCCATCCAACGTGAAAGATAGAGAAGTTTAAACCCTTGCAGCTGAAT  
TCATTGGCCCAACTGTGAGGACATTTCCAGGCCGACTTCGCCTTTGAGAA  
GATGCCACGCCTGGCCTCTAGGCTGGTTCTTCCGATCAGTGTGTCTGGAG  
TGAGTCCATAGTGTCTGGGAGGCTGCAGATGCCCAAGGGGGAGCTGGTG  
AGGTGTGGACCGTGTGGACCGGCCACTTTGATACAGCACGTCAGCTCAAG  
TATTCGGGAGGGAGAGGAAAAGTTATTTATTTATTTTAAATGGTAGAGGGT  
AGGAATGAAAATGTGCGAGTATTTCTGGGTCAACCAGAGCCATACAAGAT  
ATAACAGCCACAAGTAGAAGAGATAATGATCTAAAAGGATTATTTCTCCT  
TTATGTATGCACATTTGGGATTGGATCTGAGCTGATCCTTCTCGCCTATA  
GAGCCCTAGAGCAGGTTACTAAGGACACATTGTTTTCCAGAAGTCTCTCC  
TGCTTGCTGCCTGACTTGACTGAACTTTTTTTTTTTTTTTTTTTTACCC  
TGCTCTAACTCAATAATGGAGCTCTTTTTTGGTTTAAAGTTCCTTATGTG  
TGAAATCTGGGGGTTGCTGACTTTTCTTTTTTAATTGGAGTCTCAAATC  
AACTCTCTTATGGTATTATAACCCGTGATGCCATTAAAAACAGCTTGTT  
CTGGAATCCTGTATTTTCGTAAATTGATGTGTGTGATGGTCTCTGGTTCTT  
GAACAGCCATCTCTGAATGCCGTGCCTGCAATAATATTACAGTTTCTGCT  
GTTCTCAGCCTTCAGAGTCGATGGGTTTGAAGTGGTGTCTTCTCATG  
GAAACCAAGACAGAGATGTCAAGCAAGCGGATGCTATTTAAATCCAAAT  
TTAAAGGCAGGTTTGGGAAGTTGTTTTGAGAGTTGGAGGAATTGGGATTG  
ATAGGACAAAAGAATTGACAGAAGAGAGAACAAGTTGGCTGTTGAGGGTG  
AGAGGTTACTGAGGGCTTCAGCTGCTGCTATTTTCGATATTTTGCAAAGGA  
AAATAATCAAACCAAGAGTATTCAGTGATATGTAAATTAAATGAAGATG  
CAGTGGAGCTAGGGGTGACCACTGAGAGGGCTCCTCCCAAACACACAGTG  
CTGCCACTTAAAAAGACTTGAGATATTTGAAAGGGGTGGGTCTGGGGGC  
AAGAAATGAGGGAGGGGAAATCTTCAACTTATTTCTGAAAAACAGAAAAAA  
AATCTAAAATTTCTGGTGCACAGGTTTGTTTTTGTCTGTTTTTTTTTTT  
TCCAAGAAAATTTTGCAGAAGCTATGTTTTTAAAGTGATATTTTATAAA  
GTTTATCAGATATTTTCATATTTAAAGCCAAATGTAAATAGAAGTCTGTA  
AAGGAAAAAAAATTTGCCATAGAAAAGTATAATTTTCAGTGCAGCAATTTCA  
GAGAGCTAGTACCTCTATGCTACCGGTTAGCATGGTTTTAGCAAATATTT  
ACCAGCCTTATAAGGTTTCGTATTGCTATGTTCTGTTATTTATTTTCAGCAT  
GGACTGTTCAATTTGAAAGCTCTTTCTAGTTAGTATTTTAAACAATTACAAG  
CTTTAAATGGCAATTTTTTTTTTTTTTTTTTTTTTTTTTTTGTCAAGAGCCA

AGACACAGGTAATGCACAACATTTTTTGTTCATTTTACCTTCAAAACAT  
TTGTCCTTATTGACTGAGTCTCCTTAATTAGTGCACATACGTCGTAAAA  
TGAAAGTCCGAGGAGACTCGCCGTGAATATTTGGGGTCTGTCCCCAGCTAT  
GTGTTGCTTCTCTATTGCAAGCAAACCCCGTTGAATTTACTTAAGAATT  
ACTCCCTTTTAAAGAATTTTTGCTCGTATCTGGATGGGCATTATATTTTT  
GGGAGGAGGCATAGATTCCCTGGTTATCCTATTTTTAAATAAAAGATAGAC  
AAAGTGAATTCTATTTTGACTATTGAGAATGGAATAGTTTCTATCCCTC  
TAAGAGTATACTTGAATCAGACATTGTAAGGATGTCAATATAGCACTGTA  
GCCATTTCCAAATTCCTGGAGAAAAGTCTGTTTTACCTTTTTTTTTTAAAA  
AAAAGAAAAAACTATTAATGCATTATTTCTTCTTTTCACTTCCTTTCTT  
CCCTATATTGTCTATTTGATGAGCTCTGTCCCCAAATCATGTTACCTTT  
GCAAAATGACAAATGTCAGCTCATGTTTTATAATAAGCCACTCAGTAAAGG  
CAAAAAGCTTGTTCTGAGGAGCAGAGTGAGCTCTCCTTCGCTCTGTCTAA  
TAATGTTAAGGTGAAAAATAAAAGTGTTGCATAGTCACCTCCCCACTCCT  
GACTAGAATCTCTTTTCTAGTTACGTTGGGTTTTAGCTCTGGGCTCTGGC  
GAGTTGAACAATCCCGGCTTTGACAATCGTGATAGTCATTATTTTCCCG  
TTTGCCGTCTTTTTGTATCTAAAAGTCTTCTCTATTGTACTGCACAAACCA  
TGGATTGTACATATTTTTATATATTATGTCTTATTTTATTATTTCTAAAT  
AAAAAATTA AAAACTGAAGACAAATTGGTGCAAGAATCTGCGGGCTTCCT  
GTATGGTTACTGTAGCATCGCTGAGATGCGAAGCAAAATGCTCCCAAACAA  
CAGGACCTAAGTGCTGAGAGTTGGGATGAATAAAGCCATAGAAATTGCCT  
GAACAGGGAGGTGTGGTGTGGTGGCAGATTAGCTTAATCCAAGTTAGAGG  
AAGTCAAGCTCATATTTTGT TTTTGGATGGAGTGGCGCAGGTAGACGGAG  
GGTAGAAAACAAGCAAGCAAAACAAAACCTGATCATAAGACATATGATAAGC  
TTTAGATTTTGAGTCTCTGTTTAATGATAATAGTCATCCTTTACGGAGCC  
CAATCTTGATAGGGTCCCGCTGATATGTTATCTCAACCCACCCACCCC  
CACGCGATTAGGATATTATTCTCCTTGACTGTGAGTCGGGAATTGGTAA  
AAGTGGAGGGTCAGATGGTAAATATGTTTGGCTCTGCAGAACAGAGAGTC  
TGTCTCAACTGTGCCCTTG TAGTGCAAAAGCAATCACTGATAATATGAAA  
ACAAATGGTGTGGCTGTGTTCAATAAACTTTACTTATAACGGGGCACC  
TGGGTGGCTCAGTGGTTGAGCGTCTGCCTTTGGCTCAGGTCGTGATCCTG  
GGATCGAGTCCCACATCAGGTTCCTCATGGGGAACCTACTTCTCCCTCTG  
CCCATGTCTCTGCCTCTCTCTGTGTGTCTCTCATGAATAAAGAAACAAA  
TCTTTTAAAAAACCAACAATTTTACTTATAACTATAGGTGATGGGCCAG  
ATGGGGCCCATGGCCTATAATTTATCAACCTCTGTTATAGAAGAAACAAG  
CCAGGTTTAAAGCTAATGGACCACAGACGTGGTATTCAAATTCAAATGTA  
TCTATCTGCCCTCTACACTTAGTTTAATCCACTAACCTATAGTTTCAGGAA  
GCAGAGTTACTAGGGATATGCAATCTCAGAGAAAATGCCACTTCTAGCAG  
ATTTGGAACAACCTTCACTTTTTTTCATGATTGGAAATACTGAGAAAATCTG  
CATCTGAAATATGGGTGTCATCTTAATGCATTTTCTTTAACAAAACCTCC  
TGTGGCACTTGTTGTGTTTCCAGCATGGCTCTGGATTCTCGTATGAATT  
AGGTAATTTAATCTTAACAGCAACTCAATGGAGTAGGCAGTGATATTCTC  
CTCAGTTAAGAAATGGGGAACAGGACCAGAGAGGTTGAGTGCCTTGTGC  
AAGCACACACAGCAAGCAGGGATTAGA ACTGAGATTTAAAATTAGGCCAG  
TTAGCACTGGGTTGTGATTCTTTTTTTAAGATTTTATTTATTTATTTGAG  
AGAGAGAGAGAGAGCGAGCACAAGCAGCATGAGTGGCAGATGGAGAAGGA  
GAAACAGACTCCTTGCTAAGCAGGAAGCCTGATGTGGGGCTCAATCCCAG  
GAACCAAAGGCAGCAAGCTTAACCAACTGAGCCACCCAGGCACCCCTGGGC  
TGTGCTTTTTATCAATACTCTGCTTTTCCATTTAGAAAGCATTTCTTGGTAAA  
AGCCCATCATTTACCCCATGGCTTCTTAGTTTTTATTTTCTTACATGATG  
AAAATGCATTCTTTTTCTTACACGGGACACATCAGGCCAGGATTTTCGAC  
CTCCTTCAAAACCTGCTCCTCCATTTCTCATCCAGTTCTTAAAGAGAGGG  
AACAACTCACAAAAGGTAGACTGGACAAATTTAAGCACTGATTGTGGGAT  
TTGGGTAAATTTCAAACCTCAGATTAAATTTCAATTAGCTGAGAATTGCTT  
ACTCTGTCTCCAGGTGCAACCACAAAGCTCCTTTACTAACCAGGTCACA  
GGCCCCCTACCACGTCATACACTTCAGCTCTCTTCCCACTGTAGGGAGCC  
AAAGGTGTAACAGGATCTCCTTGGGGATTGGTCCCACTGAGCAAAATATA  
TAATTGTACCTCCAGGCAGTGAGTTGAATGCTATATGGGCCTCACCTTTA

CTTTAAAAAAGTTATTAAATATATATGCAAAAAGAAAAAGTAGAGG  
TGGGATCTCATTGTCTGCTTAGGCTTCTTTTCAGTCACAGTTGGACAAA  
ACCTCCAGATACTGGCCTTCTGAAGCAGCAACCCAGATCACACCTGCGAA  
GAATCAAAAACAAATTTCCCACTCGAAGTTTCCATCTTACAACCTGGCAGA  
ACAGATTAAGTCCATCAGTTTTCCTTCCCAAATTTCATAAACAAATACCT  
AAATAAATGAAGGCTAGCTCTACCCACGTTAAGTGAAGAACCAAGTCCAT  
GATCAGCATATTTCAAGAAGCCAGAGCCCTTTTTTTTTTTTTTTTTTAAT  
TTTCAAAAGAGTTTCAGGTCAAGGACTCTAGGGAACCTGATGATTTGAGCC  
ACTATAGGAGGATTGTGAACACGACTTTAAAAATTGCATGAGTACAAGGT  
AATACGTGCAAAGCACCAGTGCAATAATACTCTCACAGTGCCCGCTTCTG  
GAGTAGGGTGACCAACTGTCTGGTTTGGCCGGGACAGAGGGGTTTCCCC  
CGACGCAGGGCTCACAGTGCTAAAACCTGGGAACGTTCTGGGCGAGCCGGG  
ATGAGTCAGTCCCCTGGTTTGGAAAGCTAGAGGAGTGTTGGGGAAAGAAAG  
GAGAGAGACGGTTAAGAAGAACGTGGAAGGGGAGGAGTTAAAAATCAGC  
ACAGGAGTGTTATTAATAATAAGAATAATAATGATGAATAATTACATAT  
AAGTGGTTTTTTCTAAATAACAAAGTTGTTGCCTCCAGGGCATCCCTTGT  
TTGGGAGCAATGGTTCTCTAAAAATATTACACAATTCCCTGCTTATTTAAA  
AAAAGTGGTATGTGTTATTTAATGTTTCCTTGTGTACACAAGCTAATAG  
GTGTCCCTCTGCCTGGTGGGACGTGCTTGTGAATTTTACCCATTAGGTCA  
TCAGCTGCTGTTTCGTCCCTTTGCCACAGTCCCCTAGCATCATTTAGATCT  
TTGCTTCCCCTCTGCTGTGCCCAGGAAATAAAGAATCCATTCTAAGGACT  
ATATGACTAATATCAGAATGCCAGGCAAATCAGGAAAGGTACAGATGAGA  
CACAAAAGTCTGGCTTGAATGGAGGGATTTTATGGTGAAGTGTACTCATTT  
TCAGACTCCCCCGCCGCCCCGAATTTCTGAGAGGTTGAGGCTGTTAAGG  
GGTTTGGCTTCTAAAAATCCTATTCAACTTGACCAAATATTTATGGAGG  
AATTATTATACGGTGTCTGGTTATTCAGAGTTTCTATAGGGACTTTGTCT  
TCATTAGATGATGGTTTAGGAAATGAGCAGTACAAATGTATATTCATTTT  
GCCTTGCAACTGAGACAAATAGCTGATTTTTTTTTTAAAGATTTTATTTAT  
TCATGAGAGACACAGAGAGAGAGAGAGAGAGAGAGAGAGGAGACACAGGCA  
AGGGGAGAAGCAGGCTCCATGCAGGGAGCCTGATGGGGGACTCGATCCCA  
GGTCTCCAGGATCACACCTTGGGCCGAAGGCAGCACTAAATCGCTGAGCC  
ACCGGGGCTGCCCAATAGCTGAGCTTTAGATAAAAAGAAATGTATGTATA  
AAACAATAGCTGCCAGTTATGTAGTGCTGATGATGCACTCGGTGCTACAC  
AAAGATACAGTGCTTGCCCTCCACATGCAGGAATCTTCTTCACTAATTTT  
TTCAAGGATGTTGCCATAGATTCAAATACTTTTACAACACCTTATTGCTA  
ATTGCTTAAGTTGGTTTTGTAAAACTTTGCTGCCAAGGATGCTGTTCTT  
TCACTTCATGCTGAATGACCACCTGACCCAGTCTCTGCTGAGATTAGGT  
CTGTGGAATCATCTACCTTAGCACCCCTCCAGGCCTGACACATGGGCAGA  
AGAACATCCCTTGGGCAAGTGTCTGGTTCACTCCTGGTTAACAAGGAA  
CGAACCAATTCTCACACTGCGTAGTTTTATTTGGCTTTTGTTTTTCAAAT  
TTTTGCTGATGTGCTTCTACATCTAAAGTCCTAGATAAGCCACTTTTTCT  
TTGATCCACAGAGTATTCCACTAAATAGTATATAAGAGTTTCTTTTAAA  
ATATATAAATAAATAAATAAATAAATAAATAAATAAATAAATAAATAAATAT  
ATAAATAGCTGCATTAGGTATTTAGACACAGACCCATAACAGCTGATTAT  
TTACCAATAGTGAATTTTCAGAGGCAAGTGTGTACATATCCCTGACAAAA  
TACTCTTGGCAAAACGCAGTCTCAGATGGCAGCCATTATACGAAAACGA  
GGGAAAGTCAAATCAACAATTCAGAGATTTTCTTCGGGCCTTTCATAAGC  
TCTTTGGTGGCCAAAAGATTAAACAACACTCCTCCCTGCCTTTTCCAGTAT  
CAGCCAAAAGTTGCAGCCTGCATCACTTGGGCACATTCAAGTCAATGAGGC  
AGCTGAATTAGATACCCAGGGTTGCCATAGAACTGAAAGAAGCACCAG  
AGCACCTTCTCCTGCATACTCTTAATTTTCTCTGAGTGACTTATTCAAG  
AACCAAAAATAAAAAGTGCACAAGGATGTAATTATTTAAAAAGCTGTGTT  
CGATTATAAATACAGTATGTACTTTGGCCTCAGTCTACAGCTTGCTCCTC  
CCTTCTATTTTCGAGACATTTGAACCTATTCAAACCAGAGTCTTCATTGAAG  
GTTTAATTGAAGCGAGCCCAAATTTGCCAAGATAAGGGGAATGAGGCTTT  
CTTCTGAATTTCTACCTTTTCCCAGCTCATACCCGGCATCTGAATGCGAA  
GTCTTTTAAAAGAGGGTCCGGTTCTAGTGTGTGTTTGTTCCTATTAGGCC  
ACCTGGACTCACCAGGGCCTACTAAAATTGCTCTGCCTTAAGGCATTTGC

TGGTCTAAAAACATCTCTATCGGTTTATGATCATTTTGTAGGTTAATAAAAA  
GAAGTGGACAGGAGAATGCCAAAAAAACAATTAGGGAAGAAGCTAGCTAA  
CAAATTTCTTCTTCTTTTTCTTCTTCTTCTTCTTCTTCTTTTTTTTTTAA  
AAAAAACTTTTTTTATCCTGTTGCTACTTGCAATAAACAGCTCCTTTCA  
CAATGAAGAGGTGGAGAAGGGAGACACAGTACCTTAACTCTAGTCCTATT  
GCAATATTCACCCAGGAGAAAGGGTCAGAACTGCAGAGGCAGCCCCGTGT  
CTCGACCCCTTCTTATAGGCTGATGGATTAAATGTGCTGGAAGAAAAAGT  
TACCTCTTTCTTCTCCCTTCTCTCCTGTTCTGGAACAAGGCCATCCTGA  
ACCTACCTGCTGGCATGATTTGAAAAGTGTTTAGGCTGCTATTTCTGCT  
CGTGATTTGCATGAAATTGTGTGTGATATGGAATTTACTTAAAAAGGAA  
ATGCAAAGGCACAAGGTGTGTCTGATATGCAAGAATACAACCTTAGTCG  
TGTCAGGGAATATGCCTGTACGTACGTTCTTTTGATCTGGAGGATGAGGT  
ATATACCCTCTCCCCATTTTACATGGTGTGTGGATCTGACACCAAGGTTT  
TCTGCCAGGCAAATAAGTCCTTTGTATGAAAAAATATGAAAGAACTTCC  
CCATTTTGGAGAGAGAGCAGCCTGCAGGTA AAAA ACTGGCTCGCCATGTCA  
CTCAAGCACCTGCTGAAACCAGCGACATGCTTGCAAAAAAACAACAAA  
AAAAAATATGGGGCTGAAGAACTGGCTTGAGAATCTAAGGTGGGAGATGC  
TTACGTTAACAAACCTGGAATTTTCAGACCTTTGTACCTAACGCTATATA  
AGAACTACTCAGAAGAGGTTATTACTCTGTCCATCTTAGTTATTATAAAA  
GATAAAAAGAAATCTGTGCAACCAACAGAGTTGCCGGCTTCTAACAAGGA  
GGGTCTTGCGAACCACATGGTCCATTTGTGCTGTTTAGCATTTTCATGGG  
CTTTGGGAGATAAAAAGAGTCCAGTCTGGCTGGGTACTCCTAGTGGAGAG  
GGGGGAAGAGAAAAAATCTTCACAGAAATAGGACCTGCAAAATGAGTTAG  
ATGCTTTTTTCCCGTGGAGTGTGTGCAGAAAACCCCTACTCAGCCTCTCAT  
ACGAGATTTTCTGCAAAGCCACATTGCTTAATAATGGATTTTTCAATTA  
TTTGGAAAGACTCAAAGAGGAGTTGAATTCTAGCTGTGGGTTGATGTGGG  
GAAAACAAAAACAAAACCAACCAACACCAACAATGGCAGCTGAAAACCA  
GAAACAATTCATCTGAACTCGGAGCTAAGCGGATTTTTAAGGCTGTGTTT  
GAGTGAACCTCTAAGTGGTTATTACGTACCTCTGGGTACAGAAGTCTGAG  
AATTCTAGATTTTAGAGTCCAGTTACGTTTGACTTTCGAGCCTGGTTTAC  
TCAGTGGAAAAATAAGAGCAAAAACCGAATTCTGTGAGATTTAAAAAGAGA  
TCATTTTTTGTAAGGGTGCTTTACGATTTGAAGTACTCTATATGTGTTTCT  
TTTATATTTGCATTTTTTAAATTTTCTAATCTAGATCATCTTTATCCCA  
AATTCAAAGCATATGTCAATCTCCCTCCCCCTCCAAAAGGAAAAA  
AAAGGAAGAAGAAAGAAAGAAAGGAAAGGAAATTACTTTTTCTCAT  
TTGGAAACATTCACCAAGCACCCAGCACCTAGA ACTATGATGTGTGTTGG  
AGATTCCAAGGTGCTCTTTTCCAAGAGCTTGCAGCAGGACGAGGGGGAAT  
GAGAACAACAATCACAGTAACTAATTTAGACTTAGACTTCTATTTGTG  
CTCTGACCTTAGCAATCAAATCAAAAGACCTCCAATATGGTATCTGTGCA  
AGGGATGGAAGCATACTCTTCTCCACCCCTTGCTGAGAAAAATCCATGGCA  
TTACCTGT CATATTATATATGTACCAAATGCCAAGGTGGTGGTTTTT  
TGTTTTTCTGTTTTGCAATTTTTTTTTTTTTTTTTTGTCACTGGAGTTTGT  
AAGGTTGGAGTTTATGCACCTGGACCCTGGCACTACGTGAAGGAAAGGCG  
TTGTTCTTGGCAAAGTGCTCAGTCACAAACCTATCAGATTACAGAGTGG  
TTTCCTTTATCTTGGGGCATTGGACTCTATT CAGGGGGCAAGAAGAATAG  
AATTTACAGCTTGTTAGGACATGCTCATTTATTTCTTATTCTCGTTCTTT  
CTGAGAGAAGAGTGCAGTCTCTGGCATACTCCTTG TAGGGTCAATGCC  
AAACAAGAAACACATTAGGTGCCCCAGATGCCTCTGCTGAGCAAAATGG  
CTTCACTGGCCAAAAACACA ACTGCTTCTACGTGCAAGGGGTTGGCTCT  
TCCTGGAACCTTGAGCCAAAGTAGAGTGGCCTCGCTCTTTACAGAGGAT  
TGGTGACGTTTTCTGTCAAGGTTGATTGTATAAGAAAGCTTCTGTCAACA  
TCTCGGAAGTGAATTTCCCTTATTGGATTCCAAGGGTTCTTTCCCTATC  
ACTTCCTTTTCAGATTTTCTTTTTTCTCTCACTGCTTTCATCAAATCATTTT  
GCAAGCCAAATCACTAAATTTTCATGTCACTGAAATCTTTCTGGGAAGTC  
TGCTGAAAGGAACCATTTATTTTCTTTTGACAAATCTTTTTAAAGGAAA  
GCAGTATTCCTGACAAAGAGTTAAGAGGGAGCTCATTTTGCCCATCATTC  
ACACCCTGCCACATGCACACACACACACACACACACACACACCATCCCCAG  
CACCACCTTGACATGCACGTATAAAA ACTGAATACACTACACTTACTCCAT

TTACTCCCAGAATCCTCACTGTTAAGGACACTCTCTTGTGATATTGGTAA  
GATCAAAGGGGAAATCTAGCCCAGAACTGCGCTAACATCCCATAATTCA  
GATCATTTTGGTCTGAGTTATTTATTGTTATATGTATTACAGTTACAAGAA  
AGGAAAGAGTAATAACAGTGGGATTGTGGGTGATTTTCACCTTTTGCTTT  
ACAATTTGTTTACAATTTCCACAACCTTTCCAATGAAAATATATTATCACC  
GTTTTAGGTCTTACCCAAGATTGTTGAGTTGAACACATGGCTCATTTTTTT  
TCATTCTCTTTTTTCCCTTTGTTTTCTAACACATGCATTAATTTATAGAATA  
TCAGCTGGGTGCCACTTTTGCCAAAACCCATAGGCTTTTGGATATGTAGC  
ATTCTCATGTTTTTAAAAATTTCTAAGTAGTTTGTAAATAGCTCAAAGATT  
ATCAAAAAGGATCTTCTAAAATGTTTCAGTTGGATATTTGTTTTATTTTTTT  
GTATGGTTTTATTCTTGTGGGAGGAGGCCATCTCTTTCTTTTGGTTTTTT  
ATATCTAATTTTTATTGAACCATGCTCAGAAAACACGTAATATATTATTTT  
CTTTCAAATATAATGATTAATTTTTGTACATATGCCATGACTATTTGAAA  
TGAAAAGTATATCTGTACTTTGTTATGTATACATTCTATGCATTTATATGC  
CTGTTAATGATACCATTTTATAATCCAAGTATTATATAATTCAAATATTC  
CATACTTTTAAATATGTTTCATCTGTATAATCTCTTGGCTACTAAGTGTGT  
TTAAGTCTCTTGAATGATGTTGGAATAGTCTACTTCTACTTATATTTTCT  
TTTTTTTTTAAAGATTTATTTATTTATTTGAGAGAGAGCATGTACAATTGC  
ACTCACAAGCTGGGGGAGGAGCAGAGGGAGAGAATCTTCAAGTAGGCTCC  
CTTGCTGAGCGCTGAGCCCAACTTGGGGCTCACTCTCAAGACCCAATGAG  
ATCATGACCTGAGGTGAAACCAAGAGTTGGTCGCCTAACTGACTGAGCCA  
CCCAGGCTCCTCACTACTTGTATTTCTAACAGCACTTGCTTCCTGTATGT  
CTCAGTGATATATTGTTAGGTGTATTCATCTTAATAACTGTTCAACCTCA  
CTGGCGGATTGTTGCTTTATCAAATAAAATAATCCTCTCTTTTGCCGTGA  
ATTATTTTTTTTTGTGTCAGACACTATGGCAATGCTGTTTTAGGTTTTTTAGT  
GTGTGGTTTTCCTTCCTTCTTTCTTTGATTACACTTTTTGTTGTT  
GTTGTTTACCCAGCATATGTTTTTCTCCCTGCACTGTGTATCTTTCTAT  
GTATTTTTATATGTCTGATTTTTTTTACCAAATTTGAGAAGAATATCTGT  
CATTATTATGAGTACTCATGTTTTCTATTTTCTCTTCTCTTCTTTCTTTC  
CTGCCCTTTAGATTGATGTATTTGTCTTAACTTTTTCTTTTATTGACTTA  
TAAATATATATTCTAGCTCTTTTAGTGTTGTCTTATATATTCAATAAAA  
CAAGCCGTTCCGAAAATCTAGGATTGGTTCACATTTATATCAATTTTTTCC  
AGTAAGACAAAACCTTAACATGCCCTCTCTTCCCTTCTTTCATATCCCTGT  
GCTTGTAATTCCTGCACCCTATTGTACATGCTAAAACTCAGAACTGAATG  
CATTTTCGTGGATTATATTTTAGCTTTGATGCAAAATTCATTATGCTCTCT  
TCATGAAGATGCAATAGACATTGTTACAGTGATTCAAGCAGAATAAAATT  
TTTACTATGTCAACAGAGGAATCTGGATTAAAGTTGTAAATTCAGGAAAT  
AGGTCAAGTTGTTAATTTGATATTGAGCACAGCTGCCTTTCAGTTTGGTC  
TTCAGAACCCGCAATGGTTTACCTTTCATCCAACATTGTGTGTGGTAAAG  
GACCACTTGTATTTAAACAGATCTTCTGAGTCATTCTGATGCATGAGAGT  
TTGAGAACGCTTGCAGTAGACCTAACATAGATGGGCCTCACCCCAGAGTT  
TCTAAGTCAGTAGGCTTGAGGTGGGATCCCAGACTTTCATTTCTAACAA  
GTTCTGAAGTGGCGCACAAAGATGCTGGCCCCAGGGCCCCAGATGAGGTAC  
AAAGGGTCTAGCGCAATAAATTCTGAATGGAGCTCTGAGTACTTATCTTG  
CCTGTAATAGACTAGTTTTACTCTTTTGGGACATTTACCCTCCCAAGATT  
CCAGTTTCTCAAGCAAAGGGACAGAGGAAGGACAGATGGCTTCTAAGGT  
CCAGCTAACTCTAGTTTTTGCATTTTTTTTAAAAAAATCTCTCTCTTCTC  
TCTCTCTGTAAAGACACTATGATTTTACTTTTCTATTTTCATTTAATAGGAGA  
GAACATCACATTTCATGCATTTATCAGTGATGTTAAGACAATTACATAAAG  
ATTGTTGCTTTTAGTATATGCTAGTAAAAATTTCATACAAAAAATATACA  
GCAGATTTGTTAGAAGCAAAACCAAAACCAAAAAAACCCCAATAACAAC  
AGGGAATTAAAGTTCCAACAGAATAGAGAGTAGCCTGCATAATTCATGCC  
ATTAATATTTATATGTTTTAACAGAGGGGCAAAAATATGCTTCTGTGTAT  
ATGTTGTTAGCAGCCAAATTAAAGGAAAACAGTCAAAATAAGATAAATGG  
CTTAAGAAATACATATAGTGCTGTTTTCAACTGAAGGCAAAGGAAAATAC  
CTTAATTCAGGGAGCCTGGTTAAAACAGAGAGATTTTGGTAACAGAGAGT  
TTTTTTGGATAAACTGAAAATGATAGTTATGATTTGAATAGGGATGGTAG  
GAAAGACATCCTAAGCAGAGGGGCCACTGCGGGGACACATACAGACATGG

GAAACCTAAGGCATATCTTGCTAACCACAAGAGACCCATTTTGTCTAGGG  
CGGTGATTTTGTCTCCCCGGGAACTTTTGACAATGTCTAGAGTTATTTTTTA  
GTTGTCAAAATTGGCGGGGGGTGGGGGAGAACAGTGCAACTGGCATCTTA  
GTAGGTGGAGGGCAGAAGTGCTGTTCAACATCCTACATGAACAAGAGAGA  
CCCACAACAAAGATTTATCCAGTCTAATATGTCAATAGGGCCAACATTGA  
GAAGCCCTGGTCTAGGGCATAGCTTCTTTAAGACCTTAATGGGGAATAAG  
ATTGGAAGTAGCTTAAGGTTTTTAAATGATTTTATTTGAAATGAAAGGC  
TGTGAGCGACCACTGAAGTTTTTGGAGAAGAGAATGGGGTAGTTATAGTG  
ACTTTTAGGAAGATGAAATGTCAAATACATAGGAAGATTAAGAGGTGAAG  
ATAGGAGCTGGTTAAGAGCCAATGGGGATATTTTAATAATAGGTAATAAG  
TGCTTGAACCTGAGGATGGAAGAGAAGTGGTCAATTCCAGAGACATTGCA  
GAAGAAGAATGTATATGATTTGGCAACTGCTTAAATGTCAGGAGGGGAAA  
AGATGGTAGCAAGAATCAAGGATTGGACACAGTGTGGCTGAATTAGGAAA  
CAAGAGTCATGAGGGAGGGCTGGTTGGACCGGCGGGGAATACCCACGGGG  
TCTAAAGTGCCAGCAAGACATTTATAGGTGGATATATCAAACAGGCTGCA  
AGAAGGCAGATAGAATCAGAGTAACACCTCTGTCTACATTCCTAAACTCT  
TCCAGTTGAGTTGAATCAAGTTATCACCCCTCATTACACAACAAATGAAATAT  
TTTTACTCTTAGGTGTGAGGGGGCACAGGCTGGCTTGGCTTTTCAGCAAT  
TCCACTAGAGAGGACAGTTTATCTAGTCTCATCCTAGCAGTGTATGACTG  
GAGTTCACTAAACACTTAACAATAGTCCAGGGAAGTAATGGCTTCTGTTT  
ACTAGAAATTGTGCCTGCTTCTGTGTACCATCTTCCATGATTTTAGGGTT  
GTAAATTTGCAAGTCACATTTGTTTTCTGGGCATGAGTTCACATTTATGT  
AAATCATCTTCACATGCTGCTGCAAATCCACTCAAGTCGACTGTTTCAGCA  
CATCCCAACATGTACATTTCCATGAATTACATTCTTTGTTCTAATCCTGC  
ATTGACTCATTCCCATGTACTTGCCATCATTCCTGCTGCAACTTGACTCA  
CGGTGCTTTGTTAGCCTTGTTATGTATGTCTTACTTTGCAGTGGGCAAAG  
ATGCTATCCCTCCTCCTCTTACGGCATGAGTGGAAGTAGTGGAGGCCAGG  
AATTAATCACTGCCCACAGCTGATGTACACAGCAGCCAGAAACAGGCATT  
TTGATGTATTCAATTAGATGGAAGCATGGCCAGTTTAATTCGTTCTGACTT  
ATGCAAGGCACATTTGCTTTCACTTCGGGATTTCCCTCATGCTCCCAGTTC  
CATTAAATCATGAGATGCTAGAATCTATATGTTCTATGTCTCCCAACCAT  
ATTTTTACCATGCAATTTGAGTTCACGATTCAAAGAGTAGACATGATACA  
AGGCAGCTAACTGTAGTCAGTTACACCATTTCTTTCTCTCTGTCTATGA  
GTTTCTATTAACCTGGTGGTGTAGTGTGCTGCCCCTAGGTGCAGGAGTA  
CATGTATTTTATGAATTTTATTGACTGGGCGGGATTGAGTACATAAGCTC  
CTTGAGCTACTCCATGTCCAATAGTCAAACCTACCAAGAAGAGAAACATA  
AACTAGGGTGATATACCTTGAACCCTGCTGAAAGACTATCTTCCTACTAC  
TAGGAAGGGGCAAAGAGAAGGTACTGTCTTCCAGTCTACCACCTTCCACA  
TGCCACCAAAGAAACAATTGCTAGGCAGACAAATTGGTCAGTTCCTTCTT  
GCCACTTCTACATTTTTCTGTACAACTATAATATCTACATTTCCCAAAGA  
TCTATAATAGTTTTGGCAAATGCTTTCGAAGCTGAAGGTACCATAGCAGG  
TGACTTAAAAGAAAGAGAAAAAAGAAAAGCTTAACTAACTTCACAATTC  
TATACAATGAGTCCTGCTTCTCTGGCTATTTTAATTTGAAGTTTGTTTGA  
AAATCCTGAGTTTAAAGAAGATAAAGAACCATAGAGAATAAAGAGTGGGA  
TGATTTAAAAAAGAAAGCCCTTAGGAAATATGAATTCTTGAAAAGCTA  
TGGAATGGATTGAGATTTCTTGTTTAGAGGATTTAGATGGATAAAATCAT  
GTTTTATTTAATCATCTGAACCTCCAGGCAGGCAAACCTGCTCCCTGGGG  
CTCTGGAAGGGACTTCCAGAACAGTATTTGTGACAGATGAGTTCCTTAGG  
GGCCTGGGAAGGAGAAAAATACCTTTAGAAATCTTCTTTATTCCACATAA  
GACTGACTCAGTCACAATCTTCTTCCTTCTTGTTTACCAATCTGGAAC  
AGTTTTTTGGAAATACCATCTTCAGACTGTAACTTCAGCAACAATGACA  
TAATTTTACTGAGATGAAATGGAAAGTATGGCACTAATAATATCTCAGAT  
TCATAGCAAGTGTTTCCCATTCGGGATTCCCTGTCAAAAACGATCACTGG  
GATCGAGTTGAGTGCTAATGCCCATCACTATCTAAAAACCATTTTAGTCT  
GACTGCTGCTGGGGAGTACCACCTGGGTTGTCTAACTTTTAGCTCTTTAT  
GCACCTGCACACAGACACACAGCTGCGTTATTTTCCATTGTACCTTAAAC  
AGTTCCCTCTGTACATTCTTCCCTATGACAACCTTGGATGAAAGAGTTC  
CACTTGTGGAGTCACATATTCTTTCACCTGCCAATGGAGCCAGGATTTAT

TAATTCTATAGATTTGGAAGCCCTTAGTTTTTACGTCATTTAGGGTTTCAT  
GATTAGTAAACAATCTACCCTAAGAACTTTAAAGCAGTTCCTAAACTACC  
TATACTAATCCAGAACTATAGGGAGGAAAAAAAAAAGTCCTTTGGGTC  
ATTAGCCCATGCCTTACATGCAATATCTGTGCCTCTGCTAATTACACCAA  
ATGAATCTAAACTATCTGCTGTGTCGCCATTACAGATGTCTCAGGGTAAA  
GATATGGGTTTGCTAACTAGCCTCTGTCTCCTCTAGTCACCAGACAATGA  
TTTAGTGTAAGTAACCGAAGACAAATATTTTTAGTGGCAAGGAATATTAG  
TCCTCAAGGCCACCAACCCGCTATTTGGCAACCTTGTTGTTAACTTTAGG  
TCTTCCTCTTAAAGAATTACAGGAAAGCTTAAATTGTTCTGGATAATTCT  
GGACAACCTTTGAACTTGTTGAAAACTTTTATAAAAAGCACCGCTTTTGAA  
AGGGGTCGCCATGATCCTGGAAAAGTGTGGTCAGTAATAGGTTTCTGAAT  
TTTGGGAAGTTCTGACTATTTTTCTTTTTGTCAAGTACTAAAATCCCTGAG  
AAGTGAATCATTTTTGGCTTTTTTATAAAAACGACTTCACAAATGGTAAAT  
GAATGATGGTGCGGGAATAAAGACAAAGCTGCGCTCTGGAAATTGCGATT  
TGAAGTTACCTATGTGCTGCATCAAGCTATCATAGCTGCTAGTATTTAGG  
TGATTTTTGAAGTTTGAAAGATCATGAAAAAGAATCAGACATTATTGCTT  
TTATGGACTTAAAAAATGGCTTCATCTTTATTTCTCAGACTGTTTCCAC  
AAAAATAATGCCATGCACAATGCCAAAAATGTTAGGTTACTGCTCAGGTA  
GTTACAGATTTAAACAAAGTAAACAAAAACAAAAAAAAAAAAACAAATAT  
TTTCACTGAGTTGGTTTGTAATTGGCATGAGATCTGTCTTTGCCTGTGTC  
GTTTTTCACCAAATAACTTTTTAGAATATAATACCGACAACAATAATAAA  
GGTGACTTTGCTACACACTATTAGAAGCATTTGACACACAGTATGATCTC  
ATTGAATCCGGGACAGCTAGGTATTATGACTATCATTTTTGCATAATCGA  
AGAGATTTTGAGAACTTGCTCACAAATAAATTGTTCTAGGGTGAGTCAA  
GATTTGAACCCGGGTCTCTTTGAGTCCGATCGATTCTAATTGCTATGTTA  
CTCTGTACAGAACTGCTATTGATCCACATTTATTCTTTCTCAATGTGCTG  
TGAAACACTGATCTTCCTGTTTCATTTTGTGTCAGCAAAGTGCAGGCTTCCG  
TGAGAAAAAATCTCTATTACCCAACTCCTGTGTAACTCTTCCCACCCA  
TGCATTTTTTCTGGCCCCCACATTCCCTGGTGGCACCTTATGAGTTATAC  
AATCGCCATTCATGTGTTTAAATTAAAAAAAAAAAAAAAAAGCACAGTGAG  
TATAGGGAAACCTGTCAGAAGTCAATTTTAAAAGTCCCTAGGGATGAATA  
AACGGCACACTATCCGGAGACACATGCAAAAGAACTCTCGAACACTGGC  
TAAGTGGAGGTCAAAGAGAACTGCCATGTGAGGCAGTTCTAGTAGTATAT  
CTGTTCATATGAAGTTAATGCTTACACAGTTAAAAATAATTGCCATATTG  
ATCACCGGAATGGATCACAGTATCTAGGAAATGTGCAATTTGTTCTTTTG  
TCTACAGTTTTAATTTTAGTTCAAATGACTTTCTGAATCTATTCTTTAAT  
CTAGACCTATTGCATCTGTGGTAGAAAATATAGGAACCCAATCCTCAACA  
TCCTTTGCTTGAGACTCATAATTCTCATTGCGGTATACAGTTTGGCATAG  
TGTCATTAATGAATTGACATTGAAGCCATCACGTTTATTTTGCTGCTGCA  
GCAGTCTGAGCCCCGGTTACCCTGGGTGACTTTAACTGCAGAACTAAT  
CCCATACCCATTTAATCTGCCTAACTCAGAACTTCTAAAAGAGATGACCC  
AGGAAAAAGCACTTTCACTTGCGAGTCCCTCCACCAAAGACACCCCGCTCC  
AAACAACAGAATTAACAAGAAAAAGAACAGAAAAGAAATATCTTGCTCAA  
GGGAATGAGGAATTCACCACTGCTGCGACATTAATGGTGATGGCTATTTG  
TGAAGCCTACTGAACCCCTGGATGGCTCTGAAGAAGACCCCTAGGAGAAAC  
TGTATCTTTAGCTTTTGAGCAATGCAGCTAATTTTTACCCAAAGGTGAC  
AAAATCAAAGGTTTGACCCATGACCATTGACTTGGAAAACCAAATGCAG  
GAGTCTCTGTTTCAGCTACAGAGCATCCGGAAGACAGAGGGGAGAGCTGA  
ACAGATGAATGGACAACAAGTAGTAGGTACCCGTCTTTCCTTGTTTCCAT  
GTTTACGCTCTTGCCACATAGAGCTGCAGCCTTTGTTCTTTTTTTGGTTT  
TCTACCAAACATGTAGAGCCCATGGGATACTCTGGGTAGATTTACATCTG  
GGCCCGAATAGAACATTGTGTTCTATCTTTAACTCACAGGACATCACAGC  
AGGAGTCTGGGTCTCCTGAGAAATCCTGGAATAATCTACAGATAGAATTT  
CTCTTTCACACCTCTTAGAGCAGTCATTAAAAATAACCGAAGCAAAGTTA  
ATATCAACGAGGGGACTATCTTTGGATTCCATGAGGATGAGATAGAAGAA  
TATGTATTTACATTTTAATGGGTGTCAAGATAAATATTTGTATTGCCATC  
AAGGTTAGAAACACTTTAAATTTTCAACTCCAGGAGCACCTGGGTGGCTC  
AGTTGGTTAAGCAACCGACTTGATCTCGGCTCAGGTCCTGGTTTCAGGGT

CATGGGATCAAGCCCCGAGTCAGGCTCCGGGCTCAGCAGGGAGTCTGCTT  
GGAGATTCTCTCCTTCTGTCCCTCACCCCAATCTCTCTCTCAAATAAA  
TAAATTAATTAATAAATATTAACCTTAAGCATTCTAAAAGTGATTTATGT  
CTTATTATTACTTTTTTAGATTTTCTTAAAGTTTTTGGCTCAGTTTTGACA  
TGTATCAAAATGGTGACAATAGTAGCTACCATGTAGGACTGGTTTGAGGA  
AATTTAAGGAAAAAATTTCTACAAAACAGTCAGCGTGGTGCCTAGCACA  
TTGTACAGGTCTAGTGTCCCTCGTTTTTAGACAGGACCCTAATTTTCATCGT  
ATTTTCTATGCCCCTCTTTCCAAGAGCATTTTGGGAACCATTTTTTACATC  
TCATTAAAATACTTAAAAGTTATTAAGTAGAGAAAGTAAAATCTAACATT  
TCTGAAATGCTTGAAATAATCATAAATCTAAAATAGTACCTGAAGAGGAA  
GGGTACCTGTCAGATTGAAGGTATAGCACGTGTGTTCTTTACAGTTTGA  
ACAAAATCCAGTTGATTTTTTTTTCTCTTACTTTCTGTACTTCCGCTTGTC  
AATGTCAGAGATTCAAAGACTGTGGATCAGCTTCAGGCACTGGTTAAGGC  
AAACATTCTTAGTTGGAAAAGTTTGAAAGTGATTTCTTGCCAAGCCCAAC  
CCTGATGGCGGGAATACTCCCTGCAAAGAGCCCTGGGCGTAGACACAGT  
GCTATCACCATCGAAACTGGGGTGAGGTGACCTGGACCTCAAAGGGAAG  
AATCTGAGACTTACCTCTCAGCCTCTGTTTATAGACTAGTTTTACCTAG  
GGCAGCATCACTCTCCCGTGTTTGGGAATATATATGGGTGTTTTGT  
TCACAATAACTGGAACATATTTTAAATATTTAATACTGAGGAGCCAGGGA  
TGTTACACTCCTGCAATGTGTTGCAGAACCTGCAAATGAAAAAAAAAATC  
CCATCCAATTTGCATTTTCATGCATTTAAAGATATTACTATATATACATA  
TGCTTATACACATATGTCTATATAACAAATATAAATATTAATAATATATA  
TATATATACATGCAGAACAAAACCAATATCCATCTCAAGATGCTAATGTA  
AATAAATGCATAGAATGGCTGATGCACTTCCTGACAGCTGAGTGGTTTAG  
GGATTAATCTTGTCTACCTCACCATTTAGATCCTCAAATGTTGCAAAAAG  
GTTAGAAATAGAAGTGCATGTCCCCACCACACCCAACTTCTGTTCAATAT  
TTAGAATGGCAACAAGAATCATAACTTACTGTTTTGTTTTTTTTTTCC  
TAACCTCAAGTTTTAAAGATGATCCCTCAAGGAAGCCATTGTGAGAAGGC  
TACTTTGGGTAGGTAGTAAATCTGTGTATGAGCCTACATGCAATGCATCT  
TCTTTAGGAAGGGATGCTTTTTAAAGAAAGATTTTTGTAGGTGGTTCTTT  
TTTGTCTGACATTGCATTTATATTGGGTTCACCTCCACATTCTTTCAT  
TTAGTTGCATTTTCAGAAAGCCAACTCATAAAAAGATATGTATTTTTTTC  
TTTGTCTATACTGGGGTGGAACCTCTTCTTATTTATATACACTGTCATA  
AACAGATGCTATAGAAACACAACTCTTATTTTTGGTGGCAACTTGTCTT  
TCCAACCTCATGCAGACCTGGAGGAAATTATATCCTGAGAAAATGAAAGA  
TTGCAACACGTTGGTGAGAAGAGGATATTATTTAAGAGCTATATTGCTCA  
GGTGAAGTACTTTTGAGCCTTCTTTAATGTCCTTCTGGGTCCCTGGCC  
AAGGAGATTTGGGTATCATGAATGTCAGTGCCTAATTCTTCCCAGCCAA  
AATTGCAACATCAAAGGAAAAAAAAAAGAGTGCAGTTTTTTGAGGAATATT  
TTACTGGGACTGTAAGTTATAAATTGGGAGGGAGGAAGAAAAATCTGGAC  
ATGGACCAAATCTTGCTTATTGTCAGAGTAACTATTATAGCAATTGAGT  
AGCTTGTGTGTTATTCTATGTGTGTGGATCCAGCAGTCAAAACAAATGTC  
CTTAGATCATAGGTACTTTAGCTAACATGCATCTTCGCATTATGAGTTTG  
TGAAAGATGAAAATAAAATAGCTTGTGTGCATTTCCAGCAGTATCTATAT  
TATTAGGTGCTTTATTTCTCCCAGGAGGAAATTTCTCTAAATTGAATATA  
AATGTATCTCCACCAAAGTCAAATTTTCCTTCACAGATGGAAAGATACAT  
CATAGTATTTTAACTTTTTTTTTTAAGAGCAGTTTTAAGTTCACAGCAAAA  
TTGAGAGGTAGGTACAAACATTTCTCATACATGCCCCACCCTCACACATG  
GACATTATAACACCCCACCACCAGAGTGGTACATTTGTTAGAATTGA  
TGGAGCTGCTACATTATAATCTCTCAAAGTTCATTGTTTATATTAGGGTC  
ACTCTGGGTATTATATTCTGTGGGTGTCATAGTATTTTTTTTTTAAAGA  
TTTTATTTATTTATTTATTTATTTATTTATTTATTTGACAGAGAGA  
GAGCTAGAGAGCACAGTCAGGGGAACAGCAGAGGGAGAGGGAGAAGCAG  
GCTCCCAACTGACCAAGGATCCCTATGTGAGGCTCCATCCCAGGACCCTG  
GAATCATGACCTGAGCCGAAGGCAGATGCTTAACCAAGTGAGCCAAGTGT  
GAGGCACCCCTCACAGCATTTTAACTTGTATTCTAAGGCAGATATTGA  
GTTCATGGATCAGATCAAGTCAAACTCTCTCAAATACCCACCTAGTTCC  
CTGGAAGAAGTCGTGTAAGTAACCAAAAGTTTTATTCTATTTGTGAGAGT

CTTTGTATTTTACTGTGCTTTCAGATTCCATTACACTTCCTGGTTTCATG  
TCATACTGGAAGTGTCAAAATGTAGCAAGAAAGAACAGCTCTAGCCTTAC  
TGGAACAAGAAGTACTTAAAGGTTTCATGAAAATATATGTCTTATTGTGA  
AATTTCTAATCCTGTTGCACAAATTTAACAGTTTCCACCCCAAACCTCCC  
CCTGTTGTCTCATGTGCTCTACTATGGGGAAAACAAACCTATGCATGCTT  
TTTACTTAACTTAGTGAAGAGATGTTAAGAGGGAACGGGTATTAGAAGAA  
CCTTGGAATATCCCCCAAAGGGTAACTGAGAACGTCTGTGTCTACCAC  
ACCCTCCTCTGTCTACTCACACCTCTCAGAACATGGCTAGTGTCTGGGC  
ACAACCATGTGGCTCACACGACCTATTTCTGAGATGTTCAATAAAAGACA  
ATATCTATTTACATGAACACATATATATTAGAGTATCAACTCTTCCCTC  
AGGCCATGCATATTATTTATCTGATAACCTAAAGAAGTAATCAGGATCAT  
CGCAGTATCTAATTTGGTAGCAAACAGACCCTCCTTGAACCTCTGAGCATA  
GATATCTATTTACTGAAAAAAAAAAAAATTAACCTTGTTAACATCCTATGT  
TACCTGTGCAGGAGAGAACATAAAAGAAAAAGAAAGTGCCATTTTCTAGG  
AGTCAAGCATTGTGAGCTAAAAACAGAATCCAGTTGACCCTTGACCCTTG  
AGCCACACAGGTTCAAACCTGTGTGGGTCCACTTATACGTGGATTTTTTTC  
GATAAATACAGAATACTGTAAAAATATTTTCTCTTTGTTAAGATTTTCTT  
AAAAACATTTTCTTTTCTCTAGCTTACTTTATTGTAAGTACACAGTGCAT  
AACACATATAACATACATATGTGTTAAGCAACTACGTTATTGGTAAGGCT  
TTAAGTCAATAGTGGGCTATTAGTAATTAAGTTTGGGCAGTCAAAAGTT  
AATGTATGAATTTTTGAGTGTATTGGGGGGGATTGGCACCCTTAGCCCTG  
TTTTTCAGGGGTCAACTGTAATCACTTTTTTCCCTTTGTGCTCAACCCAAC  
CCATATGCAGATCCTGTGAATTAAAATGACTAGCATATCAATTATCTTAA  
TTTGCTGCTTTTCTCTTGTCTTCCTTAAGTGGCTCTCCTATTCAGGCCCA  
TTATGCTTGCCTTCTAATTTCTGTAGCTTTTGAGGCAGGGGCATGATTTG  
ATTTTTTTTTTTTTTCTGTATCTTTTGAAATCTCAAACTCTAATGCCT  
AAGATCCTGAAAAGGTTTTGTCTTCAATAGTTGGTAGAAAAAGACATTA  
GCTGCATCTACACTTTTACAAATGGTTTGAAGTGAATTAGATTTTTGTAAT  
AAATCACATACAATTTAAAAAACCTGTATGTCTAAGTAGATAGGATCAT  
AAATGTGGGATTTTTCGCTTTGGGAAAAGGGGTTGGGTAGATACACTGTT  
ATGAGCTAACCCCCATCATTCAAGTCACTGTTCTTCCTTTGAGAGCATC  
AGTATCTCCAGTTGATCTGGTCCTCATGGACTCTCTTACCATTCAAAAAC  
ATAGGGACTGTCTTCCAAGAAGAGTAATAGGGCAGAGCTACAATGCAGAT  
ACCTATTCTAGCCATCTTGCTTTTCCTCTTACAAAACAACCTATATTTAGG  
GAAGGATTTACCAATCTTCAACCCTAAGTCTGGTGGATAACCACAATTC  
AAATGTCCTCACAATTCTTCACGTAAGCAGAAAAAAAACCACGGATCTGA  
GTTATGCTATAAATTAATAACAAACACAGTATATCTCTGTGTGTACATG  
TATGTGTGTGTATGTGTGTATGAAATCTTCCAAAATTGTACCTAATATT  
TATGGTGCTCATTCTGAATGGGGAGCTTATGAAAAAATTTATGCTCACC  
ACGAAAATTGTGTGTATTTGCCAGATTTGATAATGATGAACAAGTTAACA  
TTATCAGAACAAAACAAAGACAGAGGGTGTAAAGCGGTGACATGCAATTAA  
CATTTACTCTCTCTGTCTGCAGCCCTTCATTTTCATAATCAAAACACCGAA  
TTATTTCTCAGAGCTGTGGACTGTTATTCAACCATCAGAAGCACAGAGTA  
ATATGTGATGTGTAACAAGGAGGAAGACAAAACACAGTGTAAAGAGGAGGA  
AGTTATAAACGTGGGACACATTTTGAAGAGTTGCAGCCATTGAGCAAAAT  
GTGTTTTTGTGTTGGTGAAAAGGAGTTAATCTACAGTCCGTTTTTTAGAAA  
AGTGTCACCTGAAAGTATGAATATTACCTTAAAGACAGATTGCTGTTTTG  
ATAGAAAATCTGACTAAAAGGTGGAGGATTGAGGCGGTTTGTGGAAATGA  
ATTTAGCCAGCCTCTGTCAATGCTAATTATATACCTGTGATTTTCATTCTC  
CAAGATAGTATTCTTGTGTTTTACTTTTTCATCTTTAATGTTTGTCTTCT  
GCAATCTTTGAATCTTTTTTCTTTTTTAAGATTTTATTTATTTATTCATG  
AGAGACCCAAAGAGAGAGGACAGAGACATAGGCAGAGGGAGAGGCAGGTTT  
CCCTGCGGGGAGCCCGATGTAGGACTCAATCCTGGGACTCCGGGATCACG  
CCTTGAGCCAAAGGCAGACGCTCAACCACTGAGGCACCCGGGCATCCCTT  
TCTGAATCTTTTTTCAGAACAAGATTTCTTAGACTTTCCAAAGCCTGATA  
TTGACAAGATCGGTCATTAGCATCTGTAAAGGATTTGGATGACCATCATG  
CTAGTGTTGAGAAAGGGGCTTTAGTTATATGTTATCTCTACTTTTATT  
TGTGCAATTCTATATTTCAAGACTTTATTTCATCCCATTGGAAAGGACAGG

TTGTTTATTCCTTTCTCTTGCAAAGCAAAGAATCTCTATGAGGTGGAAAA  
TCACCCTGATTTTGAGGGGCACATAATTACACACTTAGTGGAAGAATCT  
CTTTACTGTCAACCTGAGTGCAAAGCGATCGCAGATCGCAGCGTGGATGG  
CTGCCTCTTCCTGAAGACCTGTGTGACAACTCATCAGGTGGAGGCTGTG  
ATCTCTAGTGACTACACCGGGTGAGGGTCTGAATTTTGATGACCTCACAG  
CAGATGAGCCTGTCTTTCTGCCCTGAGGAAGGTGGCTACTCTTGACTCTA  
GACACAGGATTCTAGCCCCCAGCTTTGGTATGGAAAATACCGATTTCAAA  
GGCCTTCCTTCAGAATTTATGCTGTGAGATGTAGGGACAACCTGCACGAA  
AACTAGATCCTACTCTTTATAATGACCCATCTGATGTGTTTTCTCTTCA  
TAGCACAGAATGTATTGTCAGGAACTAAAATATAGACCTGTAGTTACATA  
CAACCCAGAAATTAGAGAAAAGACATGACAAATGGGGGCAACTTATGCATG  
TTTTCCATTTCTTCATAGTCAGAGGAAGGAGTGTAGAGCCTCACACACA  
TTATGTACCCTGTCTGGAACATGCCACCACCCCCAGCAACCCAACCTGGA  
GGACCCCTACTCATCTCCATTCAATCTTCTGGAGGACTTCTCTGATCCTC  
CCATCTGTGTTTTCATACCACTGATATTTTCCCTTCTTAGAAAAAATGA  
AATTTGTCTGACTTTTTTGGTGATAGTCTTACATGGTCTTTTGTAATAGA  
CTTCAAACCTCCATGATAACAAGAAGTTGGTCTATTTCTCTCACACAGGGT  
CTCCCTTCTCAGCATTCCCATGTCTTGGGACACAATGGGTGCTCAATAAA  
TATTTATTGAATGAATGAATAAATGGATTGAATGAATGCAAAAATAAACA  
AACAGGAACACTGTCTTTATTCTGATTCTCCTGCTAGCCTGAAACTTTTC  
TTTTAGTTTGCCTTAGCAACTTTTGCCCACTCCTTAGATGTTTTTCCTTG  
AAGTCCCTCTCATGTCTCTTCTCATTCACCCATTTTCCCCTGATTCATTT  
CATTCCTTCTTGTGGTTTTCCATCAACCATGTGTACAATGACTCCTGAATC  
TATGTTTCTCTCACTTGACCTTTCTCTTGAGTTTAAAATGACCTTTCTCTC  
TTTCTGTTTCATCTTCTCCAGGAGATAAGGTTGTCTAGGCAACCCAGATC  
AACTGCTACCCTGCTCCCTAATGAAATCACTCAATTCCTAATTGCCTGAG  
CTAGAAAACAAAATATTATTTCTGATGCTTCCCTTTCTTCCAGACTGTCA  
TTCACCAAGTTTTATCAGCTCCACCTCCAAATTATCTCAAGGATCATGTG  
ATGGCATTCACTCCCTCTGTCTCTATCTTAGTCCAGGCTCTCACATCTCA  
CCAGAACTGTGCACGTCTGCTCTTATCCACATCAACTAGTACATTTTC  
TTTTCTAACATGTGTGTGGGGTGTGTGTGTGTGTGTGTGGCTGTCAGA  
ATTATTTCTCTTTAATGTAAATCTTCTCTGTCTTCCACTTAAGAAAAT  
CTTCCATGGCTGTGTATTACCTCATCATAAATTGCAACAGGTATCATTGA  
AGTTATCATGAAGTTAGAAGCTTTAATCACCTCCATTTTGTCTATGCTCC  
AGAGATTTCTGTGCGAAGCATAGTGGGTGATTTTACATGTCCCTGCATGTA  
TATGTTGTTTATATGTGTTAATATATATGGTTATTGTTCTGGCTGAAATG  
CCCCTCCTTTACTTTTTCTGGGCCAAATAATCTCCCACTCATGCTGTGAAA  
CCCAGTCATATCTTTACTGAGGTGATTTTCTTTCTTCTCTAAGCAGGGC  
TTAATTGTGTCTCTCATTTGTATGCCTACAGGTCTTCATCTGAATTTTTTA  
GATGGCTGATTTGAAAATTGAGGGATGGATCTAATTGTCAGGGTCCAGA  
GCAATGTGTAGAAATAGTTAGGATGGGTATTTTGTGTGTGTTAACAACA  
CTGATACCATTCTTATTATAATCCCAGCTCTGTGGTGTTTATAAATATTA  
GCTCATTAATCTGCATAGCAACTCCTGAAACAGCTACTGTTACTATTCCC  
ATTGATAGATGATAAACTTAGATCCAGAGAATTTGAATAACTTGCTCAA  
TGTCATACACGGGCCAGGATATGTACCTGGACAGTTTAGCTCCTGAGTTG  
AGATCTTGCCAACTTTAGCACTATAACCATATCCTTCAAATGGATGACAGT  
CTTTAGGGCATGTGCATCAGTAGAATTTAGACTAATGAAACTGTTTCAA  
AATAGTTGGTAGGTTATCAGTCTCCTCATTTAACCACACAGCCATA  
GGGTGTACTAACCAAAAGGTTTCTTTGAACTGCAATGCTTGATTCAGGCA  
GCTGCTCAGAGTCACACAGCTTTATGACTTCTTCATTCACATAGTGCAAA  
ACCAGAACACCCTGTTCTCCATGAACCTAGTGTCTCCCAAAGTGGAGGAG  
ATAGCCAATTCTCATTAAGCTTTATGAACTACATGCTAAATGGAACCTCA  
AGTTGCTTGAGACTAGGTGTCTTATATCTTTTCGGTTGCCTGGGATATT  
TCCCTGGGGCAGAGCTCAACAGTTGAAAGTCCATAGCTTGGGGTGACTTTT  
TATTTCTGGACATTTGGCTTTGAGATGGTTAGATAGGTTCCAAAATGT  
GTAAACTGCATGTAAACCACAATCTTTTGGGGTATGTTTCTTTTCTGATG  
GCATGCCACCCTTCACAGTCAACCCTTTGGATGAATATAAATAGTTTA  
ACGGTTAATAGATTTGGCCTGTAGGTAATAATATATTTTCTAGCATTTAGGC

TACTATTCCTTTGATAAATGCTAAGTTAAAAGAAAAAAGAATCATTTTT  
TACAATTCTAGACTAATCATGCTTTTCATGTTTTAGCTCTTTTTTCCCCT  
TCTGATTATAAAGTAATCATTTCAAAGCAATACATTCATTATATACTTA  
CTATTCAAAAATTACAGAAAAGCATAGCATGGAATGTAAAAGCCTTCTAT  
AAACAGCTTCTCAGTGATAACTGTAGTTAACAGTTTGGTACGCTTCTTTA  
ATTTTAAACACACAAGCATATATTTATACACATATATATTTATAATATAA  
TTATTAACAACAATTTTAAACAAAATTATACTATATCATAAACAGTATTT  
TTAAACCTTGCTTTTTTAAACAGAGCAATAACTGTTGAGTGTAAAACCACTC  
AGGAAGTATTATATTATACAATTTATCTTGTCTATGAGAGTCTTGATTGT  
TCCATATCACTGAATTTCCACATCTCTAAAATGTTCTGTGTTCTAATCAT  
TTAAAACCTTCTGACATAAAAAAGTTTGCTGCCTTAAGTAACAGAACTTA  
AAATCCTTTAATTTTCCTTCATATCATTCTTAGAATGTTCTTGACCACTG  
AATTGAAACAACAAATTATCTGGGAACCTTGCTATTTGTCTTTATTTTAA  
ACAAATGCACATGTCTATCAGCCAAAGTCAGCTTTCAGCAGATTCATCCA  
CATTACTCATTTGCTTATCTACATATGCATTTTCAACACTTGTCCACTTT  
GAGAACTCTAGCATTAATAAATAATTCCTCCCATGAACAAATAAACAACTC  
TGGCATAAGTTCCCATTAAATTTTTCATAGCAAATAAGTTTAATAATTTAA  
GTTAAACACACACACATAGAAAAGGTGGAAGAAACACTTCCATGGATAG  
GATAACAATGACCAGGGTTTAGAATGGATTGTTTTTTCATTAGACTCTTT  
GCCTCCCTCCCTAATTATTTTTTAAACACTTCAGAATATCTGGAAATACT  
GTTTCCATACAGGACAACCTCTCTTAATGAGATGCAGAAAAATACAGCT  
CCATCAGATAAGAGTGAACAGAGTAAGGTAAGTGTGATGCCACTTGAAGA  
ATATTTGAAGAACATGGACATGCTTAGCCAGTATAACAGAGTAATAGAAG  
AGAAGCCCTCCTTCTCTCTCCTCTATTCTGTCTCCTTTTCTGTCACTCCC  
CACATTTGTTTGAGAGTTGGCTGGGAGCAGAGCAGAAACAGAAGCTGTAC  
TGTGGAAATGTTAATAACTGAGCTTAACCATGTTAAGAATTGGCTGTGAG  
CATGTATATATATGTATACCATGAGGGACCAAATTAGAATTTGGGACGAA  
ATCTCAAGGAATCAGATTTCAATATAAGAAAATTGATTGGCAGTCAGAGA  
TGTACAGAAATGAAATTATTTGCATTGAGTGGTAATGAAAATGATCGTGA  
TGGTACCATAAACAACAAAGACAGGTTACGTGTATCGATCATCAAAAT  
ACATTATATGCATTATCACATTGAATCCTCATGATCCCGTCATGAAC TAG  
CAATTTTGTCTAACCCAACTTTACAGATAGTACACTGTGATATTTAAACT  
TGTTCAATGTCAAAACAAAACCAAAGCAACAACCTTTTTCAGTGTCTTCC  
ATGAGACAAGCCTGAATGCAGGGATAAGCTGCATTGCAGGGGTATATCTC  
ACTCCACACACCAAACCTCCTAAGTACTTTTCTCTGCATTGAATGGTAGTGA  
ATCATCTATTACTGAATTAGCCATGGAATCATCTAGATAAAATATTTAGTA  
ATCTCTTCAGCAGATGCTAAAAGCCATTGTGATAGTAAGAATGCAGTGAG  
ATTCAAACAGCTGGTGAAATGTTAGATGAGCATTATTTGGTTTTGTATTT  
TATGACCAAGCAAACACAAAGGTCACAGTTCCTGGGTGGACAGTTTTGAA  
AGCCTTCTTCCAATGCCTTCAAATTATTACAAACCCACCCCTGACCCAAT  
ACACACACACATACACACACACATTTCATTTTCAGACATTGCTTCCCACTTG  
CGGTACATGGAACACACCTTAAAAACCAACAGACCTTGGAAGACTCCATC  
ATCATTTGTGGAACAATAACACAAAACCTTTGCTTGTCTTTAGAATTTGCT  
CTTTAAAAATCCTTCTTGTCTATAGTGACAATGAAGAGCAGCTGCTCATAT  
TTTATGTTACTCTGTTCTATTTATATGAAATAAAGAGGCATGAGGATCAG  
TGCAGTGACATGGTGGACCCAATCTCTGCTTTAAATTGTGCTCAGGACTC  
AGTATATACGGCTCTCCTTGTTAGCAGGGTGATTCAATATATTGCAACAT  
TTCATTATTGAAATAATAAATAAATAGGTGTTATGTAATGTCAAGTTTT  
CTAAGGATGCAGTAGCTTCTCATCATGTATCATATATATATATCTCCAGA  
TATACAAATTAGAATGCTCTATTCTCTTTATGTGCTAGGGTGTGTATTAT  
ATATATATATATATATATATATAGCATATACTATATATATATACATATATA  
TATTAGCATATACTATATATATATACATATATTATATATATATTAGCATATA  
CTAGAGCATGAAACTTTGGGGTGGGACTCATCACTTGAATGTGTCTGTGG  
CTAGGACAGAGTTCTATTCCAACAGGCTTTCAGAACTGCAGATATGACA  
AAGATGATTGCAATTAACCATTTAGAAAGTATTTAAACTTCTGGATCTCA  
GATAGCTGTGAATTCAAAAATCTGACATTCCCATTACTCTATCAGGACTG  
TTTTTTACATCTGCGTGGATTCTACAAAATACATTTGCATGTGTTAGTTT  
TGCATGGATTTTCATGTCAATACCCACCCCCCACTCCCAAATGGACTGACT

ACTTAAAAGAAATAAGAAACAAAAAACCCTTTGTCTTGTAACATATGGTG  
CACGTGATTACTTCTGTGAGTGGTACATTTATATTTCAATAAGATGATTT  
GTGCTAATTCTTGAGTATGTTTTCAAGCGTTGCTTATGAGAGTTAAAGTC  
AGCTCCGACTCCTGGATTTTAGAGTTGACAGTGATGCAGTTCTGATAGCA  
TGTGATTACCCTGTCTCTTCTCTGGCAATCCCTGAGGCCTTTTTCCATGC  
CATTCAATTAAGGAGTTTCCATTATGACTAACTTTATGTGCTCTGAAGAT  
CTTTCATCATATGGTGCAGTGAGGCATTATTTTAAAAATAGAAATGCCTAT  
AAGACAGCTCTTTATTTTCTCCCTATCGTGACATGTTCTATTTAAGTGTG  
TGTACATCACCCACACTTATTCCTTGATTCCCTGATGATTTCTAATTCCTC  
CACATCTGTAAGGTCAACCTTTGAAGTTCAGGTGAAGAATGGAATAGGAC  
AATTTGTGAATATTTCAAGAGTCCAGCTGAGAAAAAAGAAAAGAAAAG  
AAAAGAAAAGAGCTTTGGATTGGCCACTTAAATTCCCTCTGTCTCTTTCT  
CATTTCTCTCTTTTTTTCTCTCTCCCTTTCAATTTGTCTCTGTCAATGC  
ATCTTCCTTTTTTCACTCTGATGAAGACACTTGAAATGCAACATTATTTCA  
AGAACTGTGAAGTGGTAAAGTAGCACATGCAGCTCCCTAAACTTTCTCTAT  
TGACTTGGCCGACATAAAATAAATTCCTGAATTAATTATGGTAACTGACTA  
AGAACATATCAGTGAATATCTGAGATTCAAATTACTTTACGGGATTTACT  
AAAACCAGTAAATTAATGAGGAATGATAGCTGAGTTCCCAATATTCAAGA  
AGAATTGATAGAATTTTCTTTTAAATTCTAACCTAACCTAAGATCCATG  
TCTTAGTTTTATAAGATATACTGCGATGTGACATGGGGAGGTAAGTGGAA  
CCTATTTCTTTGGTTCAAGATAGGTCTCTTTCTCAGACTGGGAAGATATT  
TACTACAGTTATATGAAGCACACTTGAGAGGCATATGATAATAATATGGA  
AACATTTTATTGAGATAAGCATCCGTTTTCTAAATTACACAGATTCAAGT  
TTTGCTCTGGAAGAGAAGATGGTGTAAATTAAGTGGGATTTGTGATTCTAC  
TGTGAGGCCAATGCCACTGCCAGTTGATTGATTACCTCTTAGACCTTCTT  
CATTGACACACATCCTCTCAACTGAAGAATTTCAATTCCTTCCTTTCTTC  
CTTTCTTTCTTTCTTTCTTTCTTTCTTTCTTTCTTTCTTTCTTTCTTTCT  
TTTCTTTCTTTCTTTCTTTCTTTCTTTCTTTCTTTCTTTCTTTCTTTCT  
TTCTTTTGAGAGAATGAGAGCATGTGAGCACAGGTATGGGACAGAGGAAG  
AGAGAGAATCTCAAGCAGGCTCCACACCCAGTGTAGGGCCCTATGTGGGG  
GCTCTGTCTCATGACCCTGAGATCATGACCTGAGCTGAAATCAAGAGCAG  
TTGCTTAACCAACTGAGCCATTCAGGTGCCCCGGAATTTCAATTTCTTAAG  
CAGACAGCACTAAAATGTTCTTTGGCCTCCAGTTACTTTCAAAGTGGTTA  
GCAATGCTACTCATATCTGAAGGTAAAGAAGCCTGTTGTGAGTAGGTAT  
CTAAGAAAGAAAATGGAATTTTGTACTCATGTTCTCCCTTTGAGGTTTCA  
AAAGGGATAAAACAAATTTCCGTATGAAAACCTCTTTATGTTTCATTAGC  
AAATAGATGTAATCTGAATGACACTCGTGCAAACAGATCTCTTAAATCCT  
AGAGATCATAAACCATTTCAAATGTTAATTGCTCTAAGTAAACATGTGAT  
TTACAGGGAACTTGCATACTTGTCTACTATTCAAGTTACTTGATCTTT  
CCGCAATTCCTAGTGCTCTTCTGATGTATTAAACCACTGAAAAATATGTG  
TGAGGTTATTTCCCTCAATATTGTTGAACAGTTTCTTCTTACTTCAGAATG  
ACAGTGTCTTTCTTCTTCTTCTTTCTTAAATAAAACATCCTCTTCATG  
CCAGCATCCTTTCTATGTTGCTTCATGTAATATTCTATTACCATGAATCA  
AGTTACATTGATGATATTAATATCATATATGAAAAAGTTACTCCACTGTG  
GCATTTGGATGAAAACAACATAATTGACTACATCAACACATTTTCTTTGT  
AATATCACTTTTAAAAAATGTTTGAATATGAACAACTGTTTATCTATAT  
CATCTTTATCTCCTGACTCACCAGTACAAATATAGCTCCAGGAAATTTAC  
CAAAAAAGCTGATTATATTGATAGGACTTCCTTCCTTCTTTCTTCCTTC  
CTTCCTTCCTTCTTCTTCTTCTTCTTCTTCTTCTTCTTCTTCTTCTTCT  
TTCTGTCTTCTTGATAAATAATTGAGTAAAGATTCTTTGTATGACAATA  
AATATCCAGACCAGAAATTTCACTTTGTCTTTAACTTCCACTTTTCATTA  
TGCTAGCAAACGGATACAATGATACTATAAAACATGGCTTCTTATTTTCA  
CCTCCAACCTTTGTCCATTTTTCAGATGGAATTCCTTTGGAAAGTGATAGTA  
AAGTATCAAATCAATCACAGATGTTTATTAGGGGATTCCTGGTATCAGG  
GTACAGTATTAACCAATAAACTAACTCAATGGTATTCTTGTTTTCTTTCA  
ACACAACAAAACCTGAAGAGCTCTTAGCACAGAACCTAGAATTGGGTAAA  
CATGTATTATAATGAACATTTTATTGAAAAAATGTGTTCTTTTCTGGAT  
AGTAGTTATCCTTATAGGCTATATATTTTAGATATAACCATTGGAAAACA

TGTCTCTTTCCTTAAAAGGAATTTCTTAAAGTGGCCAATACTGAGGATGA  
TATATGCTTTTCAGGATACTATTCTAAAAACTGCTTGATCAGGGACGCCT  
GGGGTTCACCTGGTTAAGCGTCTGACTTCGGCTCAGGGCGTGATCCTGGAG  
TTCCAGGATGGAGTCCCACAACGGGCTCCCTGCATGGAGCCTGCTTCTCC  
CTCTGCTTATCTCTATGCCTCTCTTTCTGTGTCTCTCATGAATAAATAAA  
TAAAAATCTTTATTTTTTTAATTTTAAGTTTTTTTTTAATATTTATTTATTT  
ATTTATTTATTTATTTATTTATGATAGTCACACACAGAGAGAGAGGCAGA  
GACACAGGCAGAGGGAGAAGCAGGCTCCATGCACCGGAAGCCCGACGTGG  
GATTCGATCCCGGGTCTCCAGGATCGCGCCCTGGGCCAAAGGCAGGCGCC  
AAACCGCTGCGCCACCCAGGGATCCCATTAATAAAATCTTTAAAACAAA  
AAAGTAAGAACTTCTTGATCAAATTTATGAGCATGAGATTGCCACGGACC  
CATAAGTATCCATCCTTCTGTCTATGTATGTGTAGATCAGGGGTCTGC  
AAACTATGGTCTGTAGGCCAGATAGCCTGTTTATGTAAACAAACGTTTTA  
TTGAAGCACAGCTATATTTGTTTACATATTGTTTATGTGTGAATGATGGT  
GCTTTTCGAGCTAGTATTATAGAAGTCAATAGTTGTGACAGAGACCATATG  
TGGCCACGAACCTCTAAGATACTTACTATCTGGCCCTTTAAGGAAAATGT  
TTTTGTTTTAATATTTTATTTATTTATTTGAGAGAGAGAGTGGAGGAAGG  
AATCTGCAGTAGACCCTGCACTGACCACAGACCCTGATGTGGGGCTTGAT  
CCCATGACTGTGAGATCATGACCTGAGCTGGAACCAAGAGTCTGAGGCTT  
AACAGACTGAGCCACCCAGGCTCCTCTAAGGAAAATGTTTGCCAACACCC  
GGTATTGATGATCAGCTTCTATTGATTTAGTCAACAATTAAAGATGTATT  
CAACAAACACTTAGCAAGCATTTTTCCGAAGTTTCAAACAAGAAATAAGC  
AAATATTTTCCTTACAGAGCTGAAAGTTAGGCTAGTTGAGACAGAAAAAA  
AGTAAACGTATTAGTCTATCCTTTGCTTATTTTTTTTTTAAAGTCCTTAA  
ATATTTTCAGTGATTCCCTTAAAGATTTATGAGAGAAGAAATTTCTAATTC  
ATCTCACATATGGGACTGAATTTTAGCAGAACCTCTATTTATCAAACTC  
AGTTATATTAAAGAAGATATGATACAAATATCACATATGTATATATATGT  
ACATTCATATATGTATATACACATATATATCAGAATATTTATTCATTTGTA  
AAAATAATAAAATCTTTCTATTTGCAACCACGTGGATGGATCTAGAGGGT  
ATAATGCCCAGTGAAATAAGTCAGAGAAAGACAAATAGTATATAATATTA  
CTCATATGTGGAATTTAAGAAATAAAGAAAAAAGAGACAAACAAA  
AAAACCAAGCTCTTCAATATAGAGAACACACTGGTGGTCCCAGAGCGGA  
GGTGAATAGAGAAATGGGTGAAACAGGCAAAGGATATTAAGAGTACACTT  
ATCGCCATGAATACTAAATAATATATAGAATTGCTGAACCACTATATTGT  
ACACCTGAACTTGTATAACACTATGTGTTAATTCTACTGGAATTTTAAA  
AAGGCTATCTTTTGGGAGCAAAGAGGGGAATCAAGATAAGAATTCCTCTC  
CACTTTGGCAAAGGCGAAGAGAATAATCTCATGTTTGACAATCAATAAAC  
ACAAAATTCAGATTTTGTTCCTTGAGGCAAAAATGAATCTGAGGTGTTAA  
TATTATTATCTTGATTGCTGGAGAGTCATTTGCTCCCTTGCTACACTCTG  
TCATTCAATCTCAGAGTTCTGTGAGGCAGGACATGCATGGATTGTGATTT  
CATGAGCAACTAACTGATCTGTTTAATCCAATATAAGCAAAATGATGGGA  
AGATTTCCACTGCTAGTATTGATTCTATTCATCATGCTATGAAATTAATG  
CTTGCTATTCTATGGGGCTGCACAACAGCAAGATAAGTTACATGTCTCAT  
AAACAATATCTGTCTGGAGCGTACTATGCATTGACAATGTGATAAAAAGC  
AAAAACGGAGGTCTGTGTTTTGAAAATATTAATAGATGTTCAGGCAAGT  
TCACTGCTGCTCCTTTTCGTTGACAAGCTGAAAACACACCGGAGAAGCGA  
GCTAGCCAGTTAAATCTTTCTCAGTCAAGGCAAACATGAAGACACTATGA  
AGTGCTCAAAGGAAAAACCATTCATTGATTTTGTTATAATGCACACCGTG  
ACTCCATTGCTGATTTTCAAGAGGTGACTTCAAGGATAATTATTGCCACAC  
AGGCAGACTCTTATAGGAGAATGTCATGTTAATGTCTAACCTCAAATATA  
AAATGCACCTTGAGATGTTTAGGTATAGTGTGAAAAGTCAGGGGAAACAT  
CCCCTAAATTCCTTAAAGGTATTTTCACTACCTGCACCACTAGCCT  
TCATGACCATTGGCACTAAATTTGGTGAAGACTACACCAGCAAAAATGCCA  
TTATCTGGTTTTTCAGGGATGGATGAAAAAATGTCATTGGGAACACGTAAA  
TTTGTGTTGATTCTGTGTCATCAATAGATATTCTTACAATATATAGCATACT  
AAGTTAGAGACACAGGACTGGACAATATTGCTGCCCCAGTAAGTAGAAGT  
ATCCTTAAAGGACAAGCTGTTCTTTCTTGTGTTTTATTTGAGAGATAT  
AGATAGGAACTTGGGCATGGGGCTTGTCTCATCCCTCTAGGTCTTCAG

GTTGGTCTAGCATTCTCTGAATTCACCAATGACCAATTATCTTGGATCA  
AAGACAAATACAAACAAGCAGAAGGCAGTTACTTAACATTTGTAGGATAT  
AGGGCAAGAGTTAAATAGAGAGCCACGTACCATATGTCTTACTATTTAA  
ATTATAAACCAACCTAAAAATGAATAAATTAAATATTTTCTACTCAAATC  
TCTTGACAAATACAGCTCCTTTAAGTCTTGGAGATCCAAGTTTGAGTTTG  
GAATTTTCAGAGGTTTTGAGGTTCCCATTTGGCCTATGAGAGTGAAGAAGT  
GCCAGTAGCCATACCTCATGTCTCTAAGTGCTCCTGATTCTGACCAAAAC  
CATGAAGGGACTTGCAGGCACATATGTAAATATTTCACTCATGAGGTTGTA  
AGATCCTTTTCACATTCCCTCAACATCTTTTTTCTTCCCAAATAGTTGTTGT  
CTTTGTCTACTCCTTGGACATTGTGGTATACCTATGGGGCATGGCCTCAA  
GAGGAATGGCCTCAGAAGGCTATTTGGCCAGGAAATCCCATGGTTCTGGA  
CATTTGGAAGAGAGGCTAGAAGAGAAGCACAGTTACCAGGGGGGATCCTA  
CCCTGTACTTGCTCCCTGGTGCATCTAGACTACAGACAAAATAGGATCCT  
CTAAAGTATGATGTTGGCAGCAGCTAACAAGTCTCATCCAAATCTAATGG  
TAGAGCTACTTGTGTGTTTCTGTGACAGAAATGTCTATCTTCAGAATCTC  
CCATCATATACTTTCTATGTGCCTGTAAACATAATTTGGAAAATATTTAA  
TTCTCAGCTAGAGTAAAAAAAAAGCAAAAAGATCGTGGTTATAGTATG  
TCATTGAACAGCATTTCATAATGAGGTAGATCAAAATTCTAAATTGATAA  
AATTAAATAGAATGGTCTGTGCCTTCTCTAATTATTTTGTGAAGGATTTA  
CTGAATTTAGCATGGGTTTACTGCACACAGGCCACAGCCAAACCAGCTCA  
GATTCAACTTCATGCCAGATAAGAGTTTCAATGTATTTTGGGAGATGCTG  
TATACATTTAATGTACCACATCTTCCACGAATATACCTGGTTTATTTTCT  
TGTCCTATTTTGATATCCCATACATCAGATTGTTTACTTCAAAATGAACCT  
CTCCTATAGACGTGCTTCTTCAGAGAGGAGCTCCCTGGGGTTTACTCTTG  
GCTCTCTTCACTTTCCATGATCCTCTTGACATTTTCTAATAAAATCTTCA  
CCAGTTTTTCTTTCTTTAGCAAAATTACCCTGATGATACAGAAATGCCT  
TGTGTCTAAAGACAAAATGTCAATTTACAGAGAATCTTCATTCACAGAAA  
ATTGCACATGGATCTTGGTCTATACTTCCCATAAAGATAGCTGGCTGAG  
GCAGCTTTCCTTTGGAACCTCAGTGTAACCTGATCATTTGTATAATGCATG  
CTTTATTTTCACAATGTGGAGAGTCAGGGTGAAATGGAGGAAGAAGGGAAG  
AGAAATTACTTCAGCAGCCCCCTTTAATAAATACATCTACAGTTGAATAT  
AAAACCTGGGGCTTGCTATGCAAAGACAGGCCTTGAGATACCTCAATCAT  
CTCTTTTAAATCAGGTTTCTCAAACCTCACTTTGGAAATGATTTTAAATGA  
TATATACATGACCATAAGTCCACAGATTTTTTTTTGAGTTATATTCACCTA  
CATTTTTAACCAAGCAGAATTAAAAACTAATAAATAAACAAAGAATGGA  
TCACAAAAGCAAGTCAACCTAACTAAGTCAGAGAGATTTTCTCTGGTTCA  
CAAGTCAACTACAATGGTAATAACCCCTAACACATTATATGAATATTTTTT  
TAAAAAATGATGATGATAAGGCCACACATTAAGTGCTTTTATTTTGATT  
GACATATTCATTTTTATAGCTGGCATTTAAGTGGTAAAAACAGACTGTAA  
ATGGATCTGCTTCTCAGACTTTCCTAAACAGAGTGAAGACTCTCTACCC  
CAAGGACACAGTCTCTCCTTCCACACCAACTCATCACAACTGCAATTTGT  
TTTGTTGAGAAGACAGACATGATTTTCATTTCCAACATACAGATAAATTG  
TAAGTGGTTCCCAGGTGGTCAATGAGTCATCATGAACATAAATCACAATT  
TTTTTTTCCATTCCACAGAATGAGACCTTTCCTCTTTTTTTTTTTTTTAA  
AACAAACAAACAAACAAACAAACAAACAAACAGAAAAACAGCCACATT  
CTATTCCAGGAATCTTGAGAGCAAGAACCTAATAGCTAAAGATGACTGAG  
TACACATTATTCTATGCTCAGTGCTTTACACATCTCATTCAATCCTCATT  
GTAACACTGTGAGTCAGGAATGGTGACAATCCTCATTTAACAAATACAGA  
AATGGAAGATCAGGAACCTTTGGTGACTTGACCAAAACCACTCTACTTAA  
TATACATAGGGTTGACATTTGAACCTAAGTCTGGTGACTCTAAAAATCAT  
TCTTTAATTACTTCATGAGGTATTTTCATGGTGATCTAAATCTTTAACT  
TCAGAAAAATAGCTGTGCTTCACTCCTCTGGCAATGAGGAGGATCTGAGA  
ACCTTCTTATGAGTTGTGTAGACTTGCTTGTTGAAGCCATTGTAGTTTA  
CATAACACAGTGTCACTGTTCTCTTCTCTGGTTACCAAAGAGGGGCACA  
AATCTATGAATACTTCCCCAACCATCATTAGTTATCATATGCTCTCTGTG  
CATATTCTCAGTGTGGAACATATAGTGTTTATATCTCTCTCTCTCTCTCT  
CCTGTCTCTCTCTCTTTGTCTCTATCTCTCTCTCTTTCTCTGCTGGTGG  
TTTTCAAACCTCAAGTACCTGAGCAATGTAGCAACAATACATTTGGTTAAT

ACAACTTATAAAATCAAGTCAAGGTTTATTTGTAAATGTTTTGTGCAATA  
TCACCTGCTAATTGGGTCTCAATTGATCACAGAAGAGTCTCATGGAGTAA  
ATTAATGACTTTTGAATTTCTTTTGGTGTGACTGTGATGACAATGCAAT  
CATATATTGTTGAAGCTCAGCCTTAGTAAAATTGTTAAGACTCCTACATT  
TTTAAACTCGGCGGTTTCTGCTTTGCCTTAAATATAAATTAGATTAAA  
TAGAATGATCTCTTGCTAGTGGTTTTGAGGGCTGGCCTTCTTAAACCTGT  
AGTAGCCAATGATAACTAATTCAAAGGCAATTGTTATGTTTGAGTAAATC  
TACCTTCCTCAAACCTGGATTTGACACGTTTTTTCTAACTTCTTAGAATCA  
CTAAGAATAAAGGCACATAACTCTCCAGGAAGAAAAGGGAACAATCTGTT  
CTTTTGACTATCTGATGAAACAACATAATTATTTAATATGCTCACCACA  
GTGGATGCTTTTTATGCATATATTTTTAAGCTGAGGAATAAATATGTAAA  
ATCAGGAATAGTATCATTGTATTATTCACACCCCTCCCAAACATGAAAC  
TCTACCCTTGAGATAGGCTTATAGATAGTGCCTTATTCTGGGTTTTGTT  
TTTAAACATGAAACAATTTTATTTTGAGCCATTAATATGCTTTTGCTCTG  
TCCCAATTATTTTCTATAAAAATTCCAAAGGGCATAAAGTTTAATCAACCA  
CAATACATTTTTTCCAAAAAGACCTATCATTGTGTAAAGTTGGGTCCAGTT  
TAGGTGGTAAGAATTTGTCTCCTAAAGTTAATCTTTAATCAGAGATTAGT  
TCATCATGTGGCCATTCTGTCACTGAGGTTGGTGGCACCATATTTATCTG  
CAAAGATTAGCACTTGATTATGACATTACTTGAAGAGATCAGCTGTATAA  
TCACCAGTACATGGACCTGTGTGGAAAAATAGGGTCATTTCTCTTGAATA  
ATTTATGTAGTCCATCTTCCATACTGTTGTATACATTATATATACCATGC  
ATGGATTTACCATCTTTCCTCACTCTACAGTTTTAGAGGCTGCTCATTAG  
CAGAAAGAGAGATAGAGCTCTCCACTGCGTTGATCTAAAAGGAGCTTCCA  
AAACACCCTCTACTTACCAGGAATATTAAGCATGTGACAAAACATAAAC  
AGAAAACATCAGTTATTTAGTTATCAAAACAGAGCTGTGGGCAATTCAGT  
TTGGTTCATTTTTGGAGAAACCTTGGTCTCCTTTTCATTTAAATATACAA  
ACTATGTCCAGGTCCTTCTTGTATACAATGTGACACGGGCAACAATCAA  
CCACACTCTCAGATTTTAAACATTTATCTTAATCATTCGATTACTGATG  
ATACAACATCAGTCCCCTTAAGTCAATTTTTTTAAGGTCTTAAGAAGGCA  
ATTTAAGATGCAAAAAATGAACCAACCCTCATCAAGGCTGAGACCCTATC  
CAACCAGTCCTTGTGAACAGAGAACTGAGTCTGCCTTCCAGCAACCACTG  
TCCTCAGCAACAAACGTTATTGATCAAAAACCAATGAAATTAAACATCA  
TAACATGTAATGTTTAAGCCAATGATTGCTTATTTCCCTACCAAAATTGG  
AAGAGAATTAAAGTAAACACTCCCCACTCCCCCAGGGAATCTCTCCTA  
GACACCTGACTCTCTTTTCTGGAATGCCTTCCCTGTACTCATCAAAGAAT  
ATCAATTCCATCGATGAAACAAAGAAAAGATGATTATCTTGTTATATGC  
TTCTATTACAATGATGACTGTGGCACAGAGACATATTTTACATAGTAGAA  
TGGGCTTCTTAATCTTTTGCAAAAATGTGGTTGTTTCCTTCCCTGGGAGTG  
GAGGTCTGAGAGAGCCAGGAGGGAAAGGGCTACTGACAGTTCTGTTAGC  
CTGCCAGGAAAAAGCCTGCCTGGCCAGTTTGGGGGACCTGGGACTGAATG  
GGATATTCTGCAACAAACGGGAATGGCAGCTTCTGTCTCGATAACTTCCT  
ATTTGGCAAGTACAACATGTGTTGATTTATACAGTTGATATTGCAGAAGA  
GCAGGCAGCAAACTAAAAAAAAAAAAAAAAAAAAAAAAAAGGCAGA  
GCCACAGGCTTCTGTGCTCACAATCATGTCTCATTATGTTGTTCCATGTA  
TATTTTCTAAGGATTTTACCATTAGTGTCTAGAAATTTAAGATTGAAAA  
CTTCAGGCTCCCATTGTGGCTTAGCTAACCAACTCAGAGTGGAATGATGTC  
TTTTTTTTTTTTAATCTTATTTATTTATTTGAGAGAGAGAGAGAGAGAG  
AGCATGAGTACAAGGGAGTGTAGGGGCAGAGGGAGAGTGAGAAGTAGATT  
CCCCCTTGAGCAGGGATCCCGATATGGGACTCCATCCCAGGGGTCATGAC  
CTGAGCTGAAGGCAGATGCTTAAGTATTGAGCCTCCCAGGAGCCCCTGG  
AATGATGTCTTGATAGTAATGTCAAAGAAATGGAGGGAACACAAACCCAC  
AGTTTGGGAATGGTCTACACACATGCCTTTGTCCCTTAAGCTCAAGCTCA  
ATGTATAGGCTGTTCAATCAGATTTCCAGTGATACTTTAATAGTATTGAA  
ATAAGTGAATCACGTTTAGTATAAGTCTGAGTTCTTCAATTTCCCTACTTC  
ATTCAGATTTTTGCATGTGTTCAAAGAAAGCTTCACATGGCCTCAATTCA  
TTACCTTTCCCACTTGATTAGCAGAAAGAAAATGAATAGCTTGCTTGGC  
TTTGTCTGGTTTTCTGTATCCCAAACGTGAAGAAGAAAATCAAATTGCCCAT  
AAATTGTATCTCCTAGTTCTCTTTTTGGGATACTAGCATTCCTAGCAAAA

GGATTCCTACCTAGGCAGACACGCTCTGCAAGGTGAACTCCAAAACAAGC  
TATTGTCAGCTGCTATGAATCTTTCATCCAACCATTAGTTGGAATAATCA  
TTCACCTCACTCAATTCTCTGAATATCTTTGGGACATCTTTTATGTGGAAC  
AGTTGGGAAAAAGGTAAATTCCCTTGGGGGACTGATTTACCACATCCGTT  
TTTCATGTATAGCTTTAAATGTTTCCTCTAGAACTAAATGTGTACTTTCC  
CATGCTGTGCTCTTGAATGATGAGATCCATCCTCATGCACGCAAAAAAGT  
ACACATGCACGCTTGTGTATATCCATTGTCATTTACCTACATGGATAGGG  
AGGAATATTGATGGAGAAAAATGCCAAACAGGAGTCAATTCTGGAGTTGCT  
CTTGCTTACAAAATGTATTTTGGGGGGCCGTAGATTTACCTTCCAAGTTA  
TGTTAATGTTAAATAGATTAGCCCCGCACGCAGCAGCCCTATGCTAGGA  
TAGGAGACACTGGGTGGAGTGGAGAGTGGAGGAATAAGGTCTCCGATGAT  
CAGGGCAGCAGATAGAGGCCAAAGCAGCATTTTAAAAATATACTCTGGATTA  
CCTACAGAATAAATAAAGCTTATGCAGGCCCAGGAGTTTCGTTGTTGACCT  
TTCTTATATAAATTGCATTTTTTATCTTTATGTTTCTCTTCAAATGTATTTT  
TCTTATAAAATATCTCCCCAAATATATGTGTCTTTTCATGGAAGAACTTCC  
ATGTTCCATAACCACACAAGCACATGGAAAAAGATCTTCTGGTTGAGGTT  
TGTTTCATTGCGTGAATGATAACCTCCTATATAAGCACCCATGGAGATTTA  
GCCACCAAATCACTTTTAGCTCACTTCCCAACCCCATGCAGAAATGAACC  
AGGGAATACAATCGATTACGTAGGTATTCTCTTATTCCAGCCAGGCACTT  
GACCTTGGGGAGAAGAGATGTGGTTGTTAAACAACAGATTTTAAGTCGG  
CCAAGTCAACTAGGAGACATCGTAGAAGAGACTCCTTGGAGGGGAAAAGC  
CTTGAAACCTCAGCAAGCAGGACTTTGAGAAGCGCTGCCTGTCTCCCCAC  
TCCCAGCCACTTTGGAATTCTCTTTTGAGTAAAGTGGTTCCATTCTGATG  
GTCAAAAAGGCCAGGCCAGAAAAACCTGCTGGAACCTGGCTTTGGACAGTGC  
AGACAATTTCTTGGGGAAAAACACCCTTTATTTCTGCTTTCCTGAATCT  
GTTAAAAACATGTTTGTGTTTGGCATTGTTTCTGCCTTAGTGTGATTTTAG  
TATTCCACAGTTTGAGAGGATTAGGTTTCACCTTGTGACCAAAATGAGGG  
CTGGGAGTAAGTTAACTCCACAGCTTAGAATCCTATAATTATGGGTCAA  
ATAGAAGGAGTAAGGTGAGTCTAGATAAACTTTGTTTTAAGGATTTAATG  
CAACATACTGAGTATGACTTAAGACATATTATATTTCTGTGTTATATACT  
TTGGGCATATCACATGATACCTGTGCCTTCAACATATCATATGCCAACAT  
TTTACAAGGGTTGTGTATGAAGGGTTGTGTATAAAAAGAACTTGGGAAATG  
AAGGGAGGTAGGAGTCCAGCCCCCTCACTCTATAGAACAGACACTGCATG  
AGATGGAATATAAGAAATGATCTCAGAGTCACACAAAAAAATGCTCCATG  
AGCGTTCAGTTTCTCATGGAGACACTTTTGATTCTAAGCAAAAACCTCCTG  
TTTAAGATACACACATATACAATTATTTAAAAATATAATATTGTATGTATG  
AATTATGGAAGCTGGGATCTGTTTGGTTTTAGAACTGCTGACCAAAAGTA  
GCTCTGACTTGCTTGCTTACAGCAGCTCTGAAAATAAAATATAAATGTAC  
TGAAAAACAAGTTCTAGATAAGAGCTAGTTCTATCTCCTTGGAGCAGAGG  
AGAGAGAATCCTGGGCAGTTTTTTAAACAAGAACCCAGTTTCCATTGCTA  
TAAGGGAGATTTCTTTAGCAAGACAAATAAAGAGTGAAAAGGCTCTGAT  
AGGACAACCTGTATCTTTATCAAAGCTAGTAAGTATATTCTCTGAGATAAT  
AATTATATGGGAAAAAAAAAACACAACACAGGAGACCTACCTACTCATCTT  
GTAAAATAACTATTTCATCCAGTGTCAAAAACAAGGGCATATTTTTTACATA  
CTTGTATTTATTCTATTAGGATCTCTATAAACTCAAAAGGCCCCAAAATAT  
TTTCACTGCAATGGTGGAGATATCAGCTTTAAAGTAATAAAAACCTGTATG  
GAATCCTAACATAAAGGGATAGTAAAATGTCACCCCTTATTCTTCTTTGT  
TGGACAAGGTTTTATTACTATTATTTGAAGTTTCATACCTGTAATCATCTC  
ATTATCACAACATTCTTAGAAAGGGAGGAGAAAGTATAAGAAGTTAGGC  
ACATTGCCAAGAAGTCTGTTCATGGCAATATTTCACTGTGTCCATAAAAG  
GTGGGAAAAGACTAAAAGCCAATGCTTGAGAGAGCAAAGGACAACCTTCTT  
TGTGACCAGGTAGTGGAGACAGTGTAGAGATGACCAAGATTTTCAGGGGA  
AACAAAGCTTTGTCAATAAATTATGCTGAACTATAGAATTTCAGAAACCTA  
ATCTATTTACCTCCCTATGCAGTTGGTGCCTGAAGATCACAAGATTCTATA  
TTAATAACAAATTATTATAAATGGTAGGAAATTGTTGGGAATAGATACCA  
CTGGGGAGAAAAAAGAAAGATGATTCATCAGTTTCCCTAGGAGATACCTT  
TTTATAAAAAAAAAAAAAAGTTTTAATTTATTTGTTTAAAGAGAAAGGGGGG  
GGGAAGTAAACAGGAGGAAGGGCAGGGGGAGAAGCAGATGCCCTGCTCGG

CAGGGAGCCTGATGACTACGAGGGCGACCCTAGCATCATGACCTGAGCTG  
AAGGCAGACACTTAACTGACTGAGCCACCCAGACCCCCCTAACAGATATTT  
TTGTTCTTCCATGTTTTCTCACCAAACCAAAGGCAATGTGGGAAAGAAG  
TGTAGGTATTCAGGAGAGGTAAACAGAGGCCAAAGTTATTTTTGTACCTG  
CTGTTGAATTTCCCTTATAAAAACAATATGTCTGGATAGAATTTACAGT  
CCTGGATCTTTCATATTCTTAGAACAAAAAAAAGTTTATTTTAAACCTT  
TATGAGTTTTTTAGCCAGATGAGTTTGAGCTTTCCTAGATACAGAGATAA  
GGACAGAGGGAGATGCTACACTCACAGGGCTGAAGTGGTAGGATGGAGGA  
GTGTGGGTGGGGTGTACACAGAAGAGAGAAGTTGTATAACTAAATCATA  
GTGATTTAACTTTTTATCTGAGGCTGGAGAGTTAGATCATGACTTAGGATT  
CTACACTAGGGTTTTGAAACCTTTTTGAGATAGATGAAGATAATGTACAC  
GTTACTAGAAATACTTCAGTGGTGGCTTCCCAAATCTCTCTGTAAACAGA  
GAAATCACCATGTAGCTTTTTGGGTTTCAAACCACCTCTGTCATCTCCTCT  
GATCCTCCATGTTTAAAGATGATTTGCTACTAGAAAACCTAATTGTTACT  
TCTAAGTTTGCTGTCACTACAAATGCTTTTCTGTGAAGAATTAATGACAT  
AATGCCATTCAAATATACTGAAGGTCAGGAGGCTGGCATTTTGAAATCTA  
AAAGCAATTCAACTGTGGATGATTCAATCTTTTCATTGAAAGCAGTCTCC  
TCTTACAGTTTCTAGTGCTTCGTGCTTTTCTTAGTGGCAACATTAAAGTC  
ATTATAGAAGTTTGAGTTAGATGAATGCAGCTGGTTTTATGTATTTTTCT  
GTTCACTCAGTCTTCCATTCAAATATGTAATGGACACTCAGACTATGTCA  
GGTGCTTTGCTTGCCTTGAGAACAGAACACAGCAGGAGAAAGACCTTGTC  
CCTGCCCTTCTAGAGATTTAAGTCTAGCAGGTGACTTAAATAGTGAGATA  
AATAGTAAAATATCAAGAAAACCACAGTGTTAAGGGAACATGAAGTGTGA  
GCTTGACACTTAGATGTAGGTAAGGGAAATGATGTGAGGAAATATTTATC  
CCAAAAGAAGACTTTATAATGAAAGAAGGTTAACTAACTATAGGAAAGAA  
AATGCACAGAAAGTGAAGACCTTCTGTTCTTAGATTAGAGTAGAACACAT  
AGAGAATTTAGTGTATGGATTGTACCTTAAGTGATATATACTGAAGGATT  
TTAATGGGGAGGGAGAGAAATGATCAAATTCCCATTTGAAAAAGTCAAT  
GTGGATTTCTGATATATTTTAGATTTGGAGATAAGAAATCAGTGTGAGAA  
GCAGTGTAGACCAAAGGTTAAACCAAAGACACTGGGGGTAGATTGCCTAT  
ATTTAAGGATTTATTTATTTATTTGAAAGAAAGGGGGGATGGAGAGGGA  
CAGAGGGAGAGGGAGAAAAGCAAACCTCCAGGCTAAGCATGCAGCTCACAC  
ATGATTCTGAAATCATGACCTGAGCCAAAATAAGAGTCTCATACTTAGCC  
AACTGAGCCACCCAGAAGCCTCAACACTGCCTATATTTAAATCCCAGTTC  
TACCCTTGATAGAAGTGTAACCTTGGGGAAGTTCTCTCCATATCCCAT  
TTTTTCTTCAGTAATAAAAAATAGTATTTTATACAGCTCTTATAAGGATT  
CGGAATTAATGTACACAAAAGTGCTTAGAACAGTGCTGGCATAGTGAAT  
GTTGTATAAGAATTAGCTCTTAGGAGAATTTTGCTGCGATGTATGGAAGA  
CATTAGGAGAATCTGGGTTAAGAGAGTACAATGAAGCTAGAGGGAAGAAA  
ATGGCTTTGAGAAACATTTGAGAAGTAACATCTCTGCGACTTGGTAACTG  
ATTGGATATAAAGGACTAGAGAGAAGTAGGCAGCTGGGATAAACCCAGA  
TTTCTGGTTTGAATGCCTGGTGAATGGCGTGTCTTTATTCATGCAATAGG  
CAATATGGGAAGAAAGGCCATTTTGGAGAGAGATGAGGAATTTAGTTTTG  
GACAGTGACTTGGCGATGTCTTAGTCCTTCTACTTGGTAAACTCCAATAG  
GCAATTGGATATAATATTCAAAAACATAAGGAAAAGAAGCTTGGCAGAAG  
ATATAGATTTAAGGGGTCCTTAACATATTAATGATAATTGAAGCCACGGA  
GCAGATGAGATCATCTAGAGAGTGAATCAAATGAGGAGAAGGCCAAAGA  
TAACACCCTGAAGAACATTTGAGAAGAGGGTGGAATTATAAAGCTGACAA  
CAGAAACCAAGGATGAAAAAATAAAGGAGAGGTTCCAGCTTCTGGCCATG  
ATGGAGTAACCTGGACTGCATTAACTCCTCCATTATAAACAACCATAAAAC  
CAGACAAAATATATGAAATTACTGTTTTTCAATGTTGGATCATGTAGTGC  
AGTTCTGTAATCCCAGAAGAAGGGAACGATGAGGTGAGCACGATGATTG  
CTCAGCTTTTCTGCGTAGTGGCATTTTTCTGCAGTGTGGTGCAGGACAGAAG  
CCTCCCCAGAAAACAATGGGCTGGCTGATTTGAAGAGAGAGATGGAATTC  
AGGGCTACTGTTGTACAGCTGGAATTTTTGGAGCACAGCATTGGACAGGA  
AGATCTATGCAGGGAAGGAGCTCCTAAAATCTGCATAGGGATCCCCTGA  
GGATTTGCTGAACACTAACTGTATGTGTGTGCAACGATATTCCATGAGC  
CTTGGCAAAGAACAACCTCCTGAGTAAAGACAAGTTATTGTGGAACCTATGA

GCTAGGCAGTGATCGGAGCTTGGGCAAGGCTGAGAAACCTTAATTTCTTA  
CCATCTAGGGTGAAGAAATCTTGTTGAACAGCATTAACATTCAGTAGATT  
TGAGTCTACACACAGGAGAAGGACATAGCTAGATATACCTTAACAAAGTC  
TGAAAACACATCTTAAATTTATCAAACCGATATGAAAATAAACTCCTCAC  
CAGAACAAAACCTCAACAAAGAGGGAACAAAATCCAAATGCTCAAGAACTT  
GATATCCGTATGTCCACTTTACATTAATGATAAAAATGTTTCCAAATTTG  
CCCCAGTTTATAAACTAACAGATCCAAGAAGTTCAAGAACTCAAGGTCA  
GGTAATAAAAAAGAAAGCCATGGCAAGGGCCATCATAATAGAAGTAAGTA  
GGCCTGCAAAAGAGCAGATAAATGTGACCCTAAGGAAAAATAAAATCAAT  
AACTATGGACTCAGAAATAAGACAATGGAATTAGAAAGACCTTTAAAAGA  
ACAATTATACACATACTAAAGAAGCTAAAAGAAAATATGAAGACAATGAA  
GAAAAAACTAAGGTCTCTATAGCAAAATTAAGATTATAAAAAAGAAAC  
ATGGAAATTATAGAAGTATAAAATATAATACTGGAATGAAAAAACTCA  
ATATATTTGTTTAGCTGGTTAGACACTGCAAAATTAAGATCGGTGTCCTT  
GATTCCTCAAAAAAATGAAACATAAAATTATCATGTGATCTGGCATTCCA  
CTTTTAGGCATTTACCCAAAAGAAATGAAAGTAGGGAGTCAGATATTTGT  
ACACTCATGTTTCATAGAAGCATTCAATTATTCATGGTAGCCAAAGAGTGGA  
AGCAACCCAAGTGTCTATTGATGGATAAATGGATAAACAAAAGATGGCAT  
ATAAACCCAATTAGTATTGTTTCAGCCTTAACAAGTACAGAAATTCAGGA  
TGACTGGGTGGCTCAGGGGTTGAGCATCTGCCTTCGGTTCAGGGCATGAT  
CCCGGGATCCTGGGATCAAGTCCTGCATCAGGCTTCTATAGAGAACCTA  
CCTTTCCCTCTGCCTGTGTCTCTGCCTCTCTGTGTCTCTCATGAATAA  
ATAAATATTTATTCATTAATCCCGGGACCCCAGGATCATGCCCTGAGCCA  
AAGGCAGACACTCAACCACTGAGCCACCCAGGTGCCCTATATGATTCCA  
CTTATATGAGGTATCTAGACTACTCAAATCGGTAGGGACAGAAAGCAGAA  
TGATGGTTGCCAAAGGCTAGGGGAGGAAGCAATGAGGAGTTCATATGGAA  
TGGATACAGACTTTGAGTTGAGGATGTTCCAAAGATGGATGGTGGTAATG  
GTTGCAAAACAATGTAAATGTACTTCATGCCATAGGAGTTTACACTTAGA  
CATGGCTAAAATGGTAAGTTTATGTTACATATATATATTTTTTAATGTTT  
TAAGTGAGTAGTCTCTGGGTAGTCAGATTGTGATTTTTTCTTTTTCTCTT  
CTTTATTTTGTAAATATTAGATGATGGAATATAAGGGAAAAACTGAAAA  
AAAAAGAGACAAAATAAAACAGAAGAACTATGATTTTTATAATACTCCC  
TAATATATAGAGTAGGATTTACACCCAGTACATATGGATGTAAATGTCAG  
AAAAAGATTAACACTAAAGGATAATATGTAGAGTTGGAGTAAACGTGATA  
GAATGAGTGACTTGATTTTAAGATTCCAGAGGTACAGCAAAGTATTGCTT  
TGTTTTTGTGTTTTGTTTAGCTTTTGCATAATAAAAGTTCTATGACTTAA  
AAAGAATCCATAAATGTGAGAGCAATAAAATTTATCCAAAATGAAGCAGA  
AAGAGAGGGGGGAAAAAGAGGTAAAAACCTGCCCTGGTTTATGGCTCAAT  
GACCTATGGGACTCAAACAATCATGTGTCTGTGTAATCGGAGCACCAGAA  
AAAGGAGCTTAGTATCTTTAGAGACAAAAATGAAAATTTTTCTAAATTTG  
CTGAAATATATAAACTAACAGATTCAGGAAGCTCAGTAAAACCCAGGAAA  
AGTAAATGGAAAACAAATCATGGCAAGACACAACATAAGCTGCTAAAAAA  
AAAAAAAAAAAAAAAAAGTGAGAAATAAAACCTTGAAAGTATGGGACAAGG  
GTTCAATTATACACAGGAGGCAAGAAAGTCTGTTGACTTCTTAGCAGAAGT  
ACTGAAACCTAGGAGACCAACACTGTCATCTTTGAAGAGTTAGAGGAACA  
ATAAGAACACAAAAATCTGTTGGCCTGGAGTCTATATTTGTAAATAA  
CATTCTTTAACATAAAGACTTTCTAGAAAGGAAAGCGATAGAATTCATT  
GCCAGCCAAACTGCATCACAAAGAAATGTTAAGTGAAGTTCATTAGGTTGA  
AGGAAAGTGATAACCTATGGAAACATGTCTACACAAGGCATGAGGAGTGA  
CAGAGGAAGCCTCATGTGTTAATGCACAATTTCCAGTTTTTCTTCACCTC  
CTCGGTGACCATGATGTTCCAGATAAATTGAGGCTTTGTAAACACTATTCT  
TTGAGAGAAGTTAGCCTCTCCCCAGCCAGATAACTTTTGTCTGGTTAAG  
TCCTAGTCATCCTGTGATCAATTCAACAGTGACTTTATCTACGAAGTCTC  
TCCCTATATTTCCAAAGCTGTATTTTCGGTTCCCTGCTGTAAGGTCTACATTT  
TATTCTCTTCTTATTTATTTTCAGTTTATAATTATACCACTTTACAAAGAT  
ATTTAATATTATTATTATCATTTTCAGGTGGCTCTGTCTTCTTCCACTAGA  
AAACATGTTCCATGAAGATGGGAAGCATTTGGCTTTGGTTCATTGTTTTA  
TATCCATGGGTATATAGTTGATATTTAGTAAATATTTGTTGAATGAATT

CATGAATGAAAACCTGAGAGTTGATAGGAAGAATATATTCAAGTCTAAAGG  
ATCAGAGTTAATAGAGTTGTTTCGGGAGAACTCTTCAGAATACTGTGAT  
GAACAGGAGTCTTTTAAGAAGGTGGAAATTATTAGAATGTTAAGAAGGTC  
AGAGCACTGGGAGACTAATGTTGAACAAGCTACCTGTGTGAATGAATATT  
CCAGTTTTCATAGGATCATGAAGGCTCAGGGAATGGAAAAGCAAGACTACA  
GAGTTAATGCATGAAGTAACAAGTGAATAGATAGAAAATGTCATGAAGAG  
GCAATAGAGCATCCTCTAGGTGACTGGCTGTGTCTGAAGAAATAATGAT  
TTATATAGGGGAAAAGAAGTGGCCTTGAGGTCTTAGGAGAATGGTAAGCC  
TGATTCAGACCCTATGGTGTGTCAGAGTGTGTAGTTAAGAGCCTCTACTC  
AAAAGAGCTGCAAGCACATGATGACTTGCCCTGTAGGGCACACGGCCCAG  
TGTATAGGCCTCAGGGTGAGTGAGCATCATGACCACTAGGCTGGAAAGGG  
TCAGACTAGCCTGTGAGCTGAAAAAGGCTATGGAGATTGAGTTTGACATT  
GGGAAAAAAGGTGAGATCTTACTCCATTCTGCTTGTTCAAAATATTTTC  
AGCTTAGGGTTAGGCAACTTCTTTAAAGCAAATTCCATGTATGAAAAGCT  
TCAGCTCTAATCCTAATGGAAAAGTCCTTCTGGAACCTTTATGGACCTAAAG  
GGATTTATCAGTCTTGTGAGTGATAAGATCCTTCTGTTTAATATATAAAT  
CGCCTCTGCTGCAGATAAAAATGGGAAAATGAGCCTCCTCATCTGTTAAAG  
GGCCCGTTCAAGTTTGCATTATGGATATTGCTCGACCAGTGGGAATCTGT  
GTAGAACACTGAATCCAGAAGCATTATGACGCATAAAACCACTCAGCATCC  
AGAAGCATTATGATGCATAAAACCATCAGGAGATGGTTAAATACCACTGCC  
TGCACTGGAGCAGAAAAGGTAGAAAACCTGATTAATTTTTGGAAAGGTATC  
ATCTGGATAAGGCATTTGGCTAGCCTGTACTAAAAGTTGAGATTTACCA  
TAAAACCCCGTTTAAAGTCTCTCAGTTTTTGTGATAACAATACAAGTGATC  
TGAAGGAGGACTGTACAATGCACCCCTTCTGACATCTGTTGTCTTGATT  
CCCATGTAAAACCTGCATCCCTAATTATAGACATACTTTGGATTACAGACA  
CTAAATCTCGTAGGAATCACTCTTAAAATGTCAATTCCCACAGGAAGGAC  
TCTACATTCATCTATCTTCAATTAACAACCTGAACATGGGTTGATTTTCAT  
GGCCTTTAGGGAAAAGGGTGGGACCATGAGATCAGTTGTAAAGAATGACA  
GGTAGAGATTTCTGTAAAGATGTATAGGATGTTGAAGTGTCTGGCCTTGA  
ACATGGGAGCAGCAGGTGCCCTAAGACAGGAAAATGTGCCACCAAATATT  
GTAATAAAGGGACTAGATTGTGAAAGAGATTGGGAGGGAAACAGTGACAA  
ACAAAAACCTCAATTTCACTTTTATTCAGCCAGTTAGCAAATATCATTGG  
GCACTTTCTACATACTGGGGGATAAAATACTGAGCAAAGCAGGCAGCAAT  
CTGTGTCCTCATGACGCATGGATCCTAGTGGGAGGAGGTAAATAATACAC  
GAGACAAATAAGTAAATTTATTTACTTATTTACAAATAAGTAAATTTAAA  
CCACATTTAAGTTCAAGATTTGTACTATGGAAAAAGATCAATAAGGGGAT  
AAGGTTTGCAAGTGTAGGGATTTGGGGTAAAATTCTAAACAGGCATCTCA  
GGAAAAGCCTCATTGAGAAGGGGCACTTAAATAATGATTTGAAGGAAATG  
AGAGAATGAGCCACGCAGATACCTTAAAGAGATTTCCAAGCTGAAGAAAC  
AGCAAATGCAGAGGCCCTGAGGCATGAGTATACCTGGCATATTCAAGGAA  
GAACCAGGAGACTAGTGTCACTGCTGTGAATGAACAAGAATAAGAAGAGA  
TGAGAGAGAGGAGCAGCTCCCAATAGGACTTTGGCTTTTATTCAGTGATA  
TGAGAAGGCACCAGAAGTTTTCCGCTGAAAAGTAATATGATCTCATACAT  
TTTTCAAAGATGTTCTTGGCTGTTGTATTTAGGAAAAAACTATAGGGACA  
AAGCGGGGAGATTTGGAAGAGAGGGGTTTCTTGCAGAAAACAGAAAGATT  
ATGTGGATGCCACAGTGCTTGCTGTGGAGGTGTTAAGAAACAGTCACAGT  
TGGTGTACAATTTGTAGTCAAAGCCAATAAGATTTGCTATTAGATGCAAT  
ATATAGGAGGAAGAGAAGAGTCAAGGATGATCCCAAGATATTTGGCTGAG  
CAACTAGACGGGAGAAGAATTGTCATTTATTAGGGTAGGAAAGATGTTGGC  
TAGCACATAGAACGTCCAGTGTTGGCTAGAACACTGGACGTTCTTAGTTT  
GAGATTTCTATTCTGTGCCCTAGGGGAGATTTACAGGTAGGTAGTTGGAAG  
TACAAGTCCAGATTTCCAGGGAAAAGTCTTGGCTGGGATATAAATTTAAG  
CAACAGCAACATTTCTGCGGGAGTTTTTAGATGAAAAGAGGTCCCAAACT  
GGACCTTTAAACATGCCTATATTTAGAAGCTGAGAAGATGAAGAGGAATA  
AGCAAAGACACTGGGAAATCCTAGAAAAATAGGAGAAGAGCTAGGTGAAT  
ATAATGTTCTGAAAACCCAGGAGAAGGAAGTGGTCAACTGGGGCAAAATA  
ATTGTCCACAGCTTGTTAGAACAGATGTCGCTGGTGATTATGCTATGAGTA  
GCTTTGGTAGAATTAGAAAAGGTAAAATCCTGCATGGAGTAATTGTAAAGA

AGAATGGGAAACAAGGAATTTAAGGAAGAATATAGGCAACAGCTGGATGC  
CAGTCTTCAACCCGAGTCAGTGTAGGAGCATCATTAGTCCTGAGCTAGCT  
GCCATTCTCTTTGACTTAGGGCAGTTGGTTATCAAGCCAAAAGCATGGAT  
TTGACCTCAAGAGGTCTTCCAACGTTCTCATTGGAATGCTCTTTCTATTT  
AATATCAAGGGTTGCCTGGTTCTCTACACTTTAATGAAGTGTACAAACC  
AGAAAGGAAAAGAATGCACTCACAGAGTCATGAATCTAAAAAATCCCTGT  
TCTAAATATCAGAATATCAAACCTAGAATTAGAAAATCATCTGGTTATTGA  
CTGGAATAATTGTATAATTAACACTTTTTTCCCCCTCAGTCACCATCATT  
AATGGCAGAACCACATTGCTGTTATTTCCATACATCTGATCTATTTGGCC  
CCCCAGGGGTACCCCCGGTGGCCAGCGGTTTAGCGCTGCCTTCAGCTTG  
GGGCTGATCCTGGAGACCTGGGATCGAGTCTCACGTCAGGCTCCCTGCA  
TGGAGCCTGCTGCTTCCCTCTGTCTGTGTCTCTGCCTTTCTCTCTCTGT  
GTCTCTCATGAATAAATAAAATAAAATCTTTAAAAAAATAAAATAAAAT  
AAAAAATTATTTGGCCCCCATTGTGATTTGTGTGGTGACCATTTTACTT  
TATAGACATTGTGCACTCATGCCATAGAGAAGCTGTTGCTAGCATTCATA  
GTTTTCAAAGTTTGACTTATATGCTTTACTCACCTTACGGTTTGCTACC  
CACCTGCCCTACAACCTGAAGCAGCCTCGTGATCCTCGTTCATTGCTGAAA  
CGTGAACCTTCAGAGTATTACAAATGGAGATTGGTTGTGAGATTTTCATGG  
GACTCTCAGACACACAGATTGGGGTGAAGTGAAGGCTGCATCCATCTGAG  
GAATGTATTTCTCATTCGGTAATATTTGACCCCAGATGAAATAAAATGTG  
GCTTCATCTCCAATGTAAATATTGGTCAGTTCCTATCCCATTAAAGTGTTT  
CTGAAGACAAAGATTCTGGTCTATCAATCATAATAATACTCCCATTAGCT  
CTTAAGCAACATGTTTGAATAGGAACTGCCTCTCCCTATCTCTCTCTCT  
CTCTTTGCCTGTTGATGATTTAGAGACAGTAAGACCTCCAGGCTTATCTT  
GAAAAATTTTACTCAGCTTCTTTCAGTGATCATTTTAGAGCTTGCTCATG  
AAAGTGCATGTTTCTCTAAAGCAAAAGGTGATAGAAGATGAGGAGTGCAA  
AAACGCCCTCTGTCTGGCCTAATATTTTGGTGGAAGGTGACAGAGGAGATT  
AGAAAACCAACATTGAGGAAATGTTTCTGATTATCTGCTCAGTTCAGAGA  
CACTGAGAAAAAAGGTATAAATCTCCATCTGGTTTCATTTTATCTTCTCC  
TCTTCAGTCCAGATCTACCTACACTTCAGGCTTTTTTGTTCCTCTTCC  
TTTTGTTTTGTCTACTTATTCCCTTATGTTTCCGACTTATGCTTATCCTT  
TGAGAAGCTAACGTGAACATGGGAGTTTTAAAAAATAATGTATAAAGATA  
AGAGTCCATGAGTATGAAAGTCATGTTCCCTTCTTTGCACCGGGGTGAACA  
AAAGAAGTAGATGGTTGTCTGTTTAAAAGGACAATTTTCAGGGATTATATCA  
TGGGGAGGATCATGTTAGTCCTATTAGAAATGATACTTCTCATGAATTAA  
CAGTTTTCAATATTTTATAGAAAGGATGAAAAAATTGATTATAATTAAAT  
TATTATCATTATGTATCAAAACCTTACTTTCTCCCAGGCATGATGTTAAA  
GTCTATGCATGGTCATCTGATTATCAGTTCAAAAATCTATCTTGCCTATA  
GCATGACTCTCATCTCTTAAAGAAGACAATGAGCCCAGAGAAGCCAACAT  
ATTTCTGTAGAAGACTTGTGAGCCCTCTCTGAATGGCAGGCGTCTCATTT  
GCTGTCTGCATGCATCAAGGATCATCATGAAACCAACGAGTCAGCTTAGC  
ATGCAAAAGTGACCTGCCTACCACTTGTGAGGAAGGATTTTCAAATTGAA  
GAACAACGTTCTGAAGATTGTTGATGCAGATCTAGGACTTTGAAGTGGAA  
TCCCCACCACACAGAAACATATTTTTTCTAACCCTTGACATGGGGTTCC  
TCTTTTTATTTGAAATCCTATCTTAAAAAAGGAGGAGGAGGAGGAGGAGG  
TATTCTTGATTGTGAAAAAGGATATGAATTTGGACACTTTAGTCTTGAAG  
CCTAACATAAACATTTGCTGTATAAACATGGGAGGTAACATACTTGAACA  
TGTGTGCTAATCTTTTATTTTCTCCTGCTATGTTTCTAATCTCATTTATCT  
CTTTTGTAAGGTAAGTACCTGTGTATGTAAGTGGATTTTATTTTTCAGCA  
TCGTAGGCTTTTTCAAGACTTTGAAAACCTCTGAAGCTATTATATTTAAAG  
TACTTATAGATAAGAGATCTTAGGTTATCTGACAATTCCTTGAGAAAGGG  
AGAGTTAATGGTATTGTCTATTTTGCTTATGATTTGTTGAAAGACACAGAA  
GGTAAATGATATCCACATGATAAGAGCTCATTGGTGGAATGACAATAT  
TAAAGCTTAAAGGCTCCTGAATCTAAATCACTTTGCCATGCAGCCATAAT  
ATTCTGAACCAAGCCAAATCAAGTAAAAGATCTGAAAAATATATATTTAT  
GGAACAGTGCAAAGACAATGTATGTAGGTATGGGCTAAGCACTTGGAATT  
TTTAAACAATAACATCAGAAAAGATTTTGGGGGGGGGAGGAAAATAGCATTG  
AATTCATGTTTGGAAAAAAACTATAAGGCAGGTGTTGAAAAATTAAAA

GATATCATAGGGAAC TGGTTAATCTTTACTTTT TACTTTACATTTTTCAC  
TGATCCAAAATGGCAATCTTGAGTTCTAGGCTCATTATCTTAAATATTTG  
GTGACTTCAGCATGCTTTACTGGGACACGTTCAATAGCAGGTGATAGATT  
TATTTT TTTTAAAGATTTTATTTATTTATTCATGAGCAACACACAGAGGGA  
GAGAGAGAGAGAGAGGCAGAGACACAGGCAGAGGGAGAAGCAGGCTCCAT  
GCAGGGAGCCTGACGTGAGACTCGATCCCAGGTCTCCAGGATCACACCCT  
GGGCTGAAGGCAGCACTAAACTGCTGAGCCACCCAGGATGCCCAGGTGAT  
AGATTTTAAAAAAGAAAGAAAGAAGAAGAAACAAACAAACAAACAAACAA  
AGAAAACCCAGTATTTCCCATTTCTTAAGAGTTACCTTGCCTGGACGAATG  
AATGAATGGTATTACCAGCTGATATTCAGTGCATGGCTGAGATAGTGTTT  
TGGTCAAACCACATTGCTTGGTAGGGAACCTTTTTTCTCCTGATACAATT  
GGAATGAGTTCAAAGAAC TGGAATAACCAGGGAAGAAGAGCAGGCAACCG  
ATTTATGAATGAAGATTAAAGGATAAATTAAGAGGCCGATTAAATAGGC  
TTTGTCCAAACTGCATATAAGAAAGAGTGTGACAAGATTAGAAGGATACG  
TTATTGAAAAGTTTACACATTAATGAAGATGATTATATGGTGCAATAAAG  
TGCGTGCAGGGAACAGAAGCAAAGGTAAGAGCAGTATTAAACTCATCAAG  
TAGCTTTCTACGTCCAAGACCGATTACATTCTACAATGAGCTCTCCAAG  
TTGATAACAGAAGCTGTTTTCTGTTTAGAGCTAGACTCAATTCAGCCCAG  
GATGAAGTGGTCTATCATTCAGAAGTCAGAATGAAAAACAATGCTGCTTT  
TTTCTCATTAGGATGGTAGATTGAAGCATATGGACTCCCATGAGATTCAA  
ACATTTAAATTAATTCTTATCAAGAAGTTCAGGGCTTAGCTTCTTTAAGG  
CACAGATTCCCTGAGTATTGAATAGATATGTTGGGAAACAGGAAAATGAAT  
CAGCCATCTGTTGCTGTGTAACAAATTACCTCAAAACATAGTGGTTTAAA  
AATACCAATAAACATTTACCCCTCTCACATGGTTCAGCAGGTCAGGAACC  
TAGGAATGGCTTGGCTGGGTGATTCTGGCTTAGGGTCTTTCATGAAGTGG  
TGTC AAGATGTTACAGTATCTGTAATCATCAGAAGGCTTGCCGGAGGCCG  
AAGTATTCAC TTTGGGGAGAGCTCACTTGTATGTTGGCTGGCTTGTCTG  
GCTTTTGGCAGGAGGTGTCACTTCTTGCCACATGGATTTCTTCACAGGGA  
TGTTTGTGTATCCTCATGACATGACAGCTGACATTCCCCAGAATGAGTGA  
TCCAAGAAGCCACAATGTCTTTGATGACCCAGACTCAGAATCCACACACT  
ATCATTTCTGCAGTGTCTTATGATTTTACAGGCAAGCCTTGTTCAACAG  
GAGAGGAAACTATAAAAGCATAAACACTAGCAGATGGGAATTGCTGGAGG  
TCATCTTGGAGGCTGCCTATCCACAAATCCCATGACAATTGTAATTTATT  
TTAAAGGTGATATTATTTTCTTGTGCAAAATTGTGCTTTCCTAACTCTT  
CCACAACAACAATGGGGCGCCAAGCTAGGTTGTTGTCATTAACTTATAA  
AACCATTGGCATTAACTAATCTTCCATGTGTATAATAAAGAGATTTGACA  
AAATATTTTATACTTATTGATCATTTTCATGTGCAAAATGCTGATTATGCT  
CCACACAGTCTCTACAACAATCTGGACCCCAAAGCAAGAGACCTGGAGAC  
TGAGGCTAGAGAGGTCAATTAATTTTCCAAAGTTCATATGGCTATGAAGA  
GACGGGGGCAGATTTGAATCCAGACTGAAACAGCAGAGCCCAGGAACAGA  
TCAAGATCCTGGCAGGAAACAAGAGGCACAAACAAATTGGGAAGTTGTGA  
GTAAGTTTTCATAAAGGGGTATTACTTTTAAATGTCTAGGGCTAGGGACA  
GATTGCCACGTTAGGGGTGGGGGCAAGATAGTAAGTCCAGAAATTAGAA  
AGCCAACTATGCCAAGAAGACCTCTGATGGTAGTTATGAACTTTGTTACA  
GGAAAAGTTCATGCAGGATATATGAGGAGCTAAGGACTTTGCTATCTCCC  
CCCCAACCCACCCAGAACCTCGTCTTAGACAAATTCAACCAGAAAGAAA  
TAAGAAGTAATGGAGCCCTTTGATGCGGTCTCTATATGGCTTGGGTGAAA  
CACGGTTGAGAGGAGGCTGGAAATACCCAACACACCCACTATTATCTAC  
TATACTATGCTGTTTGTGTTCCCATGAACTCATTTAACTTTACAATCTGA  
ATATAATGAAGACACTGAAGATCAGAGGGAAAGTTCACATGCTAAAGTTT  
CTACAAC TATGATGTGGTCAAATCAATACTTAGATGTAAGCATTTGGACTC  
CAAGCACTCTGTTTTGTACCAGAAATATCAGAAAGAGTCAAGCTCCTGGCA  
GAAGAGTAGGTAATTTAGTATTAAGTGCAGTCTATCATATTTCAGTGATA  
CTTATTGCCATAAATTGTTACCACCACTGCCAGCTTCATATTTAAGTGAG  
TAGTGACAAGTGAGGAAATGATCAGTGGATTCAATCTAAGCATGTGGTGC  
TATCTAGAAGTGGCCTTACTGCTGGTGGATTTAGTGGGTATGATGATGA  
TGAGCCTCTCATTTGTTGTCTTTCTACTTCACTCTGTTGGCCAGTCTACA  
AAAGTATGTATTAGTCTCTGTTTTCTGGTTAACACTCCCAAGTTCTAGAT

ACCTAGAACTGCATCTGGTGTGTATTAAATGTCTGATGAGTGGATAAACA  
ACTGGATAAACAATCAAATGCACAAGCAGTAGCCAATCCCCAGCTTTCTT  
GTCCAGACCCTAGGTAAACCCCAATGCCACCACCATACGACCATCAACAT  
TACCATCATCATCATCTTTTAGCACAACTAGATGCCAAGTCCTGTGCCA  
AGCACTTTGTATTATGATTGTGACATAATGATTTCAATAATCTTATAAGG  
TTTATTACCTTTCTTGTACAGATAAGAAACCGAGGCTTAGCACAGAAAAT  
TAGTTGTGCAAGATCACATTCCACATAAGGTGGAATTTGAAGCCAGTTAC  
ACTGCCTTTAAAGTCTGTGTATTTAACTACTGTGCTATATTATCTCTGTA  
TCTCCAACCTCATCTGGAGTTCAGGCATGAATAAACAATTATCTGGGACTA  
TATTACTCTTGCTATACTTAAAATTATCACTTAGAGTTTGGCCTACTATT  
AGTATGTCCCCTGTCTATTAGAGAATAGCTTCCCCTACCTCTTGATTCTG  
TTTTGTTACCAAAGATTGCTTGAATTTTCCCTGGGTCTAAGGCCTCTTTT  
GACACAACAGTGGACATCCTGGAAAAAGTCTGAGGCCTGAATTTCTAGAG  
CCTCTTCATTCTTCCAAGCTTCTAGACCATTTGGATGCATTATTTTTACT  
TTTGATGGTCCTTAAATCCCAGCATATTCCACATTCATGATTGTTTCAGGG  
TATTTCAAGTTCAGGGGGCCACTTTGCTACTTAAATTGGGTTTTATATTT  
TGTAGAACAATTTAAAGAAAATAAGGCGTCTGAGAGATAGAAAGTGCCTAC  
ACAATTGTTTTCTAGCCAGTTTATTATCTTGAAATGGGAATAAAGCACT  
GGTAAAATGATCTCTCTGAGTGTCTTACTTATCAGAGCCAGACACATTTG  
CAAACGCTCACACTTGACATACCTGTACTTTGGTTTAGTAATCTGAAATT  
AAATTTGTTTCATCACTTTGGTTCTGAATCTTCCCCTAGGAGACAGGAAAA  
AAAAAATCATCGGTCTCCATGGCATCACATCTCATTTTTTTTAAGCTTTT  
TATAGATTTAAACCCAATTTCCATCCTTCATGATGATTCAGGCTGTGTCT  
ATACTACGCCAACACAACCTGGTTAAAAAGGGAAAAAGTTCAGTGTAAATAC  
GGTGAAGTTTCGTTGACAAAAATCTTAAATAAAATAAACTTCACTTATT  
TGGGAGTCTTTTAGAATTGAGACTTTCTAGATTTTTTAGTATTTTAGCTAT  
TAATATTAGGCACCATTCTAACCATTCTGTTTAGAAATCTTTGTAAATGT  
TTAACAGATTTATATTCCAAAACAGCACACACTAGATATCTTGAAATAAG  
CTCCAATATGAAACACCTAGAAATACTAGGGCAAATATAAGAAACATTCC  
CTAAGGTCAGAAAATGAAGAGAAAGCTGGAAGCACAAAGTAGCCACTTACT  
GTCTAACTGTCCTGAGAACTGAATTTTATGAATAAAGTGAAGAGAGAG  
AAGGTCTTGGAACCTATATGAGGTGGGAAGTAGGACTTGACATCTTCAAAT  
GAAATCCAGATTTTTGAAAGATTACACATTTATGGAGGAGCACAAACAGAA  
AATATCTGCCTATCAGCCAAGAGATGTGACATGGAATCTTGTTTTTTGTT  
TGTTTGTTTGTTTGCTTGTTTGTTTTGGCTCTGGATTAGAGAGGAAGGGA  
GGGAGAAAATTCTCTTCTGAGGGCTTATAACAATAGTACAGGCTTAACGA  
AGATTTGGTATGCCAATGCATCCTACTTGAACAGTCCTGAAGATCACAGG  
TCACAAAAAATCAGCATGTGTGCATGCATACACACATAATAGACCCAGT  
TTAATGTCCCTGACAGAAGTCAAAACGAACAATTTTCAGAGGGACTTTCA  
AACCAGGTCACATAAAATTTCTCCACATAAATCCCCCTTAGACTTAGTAA  
GATAAAATAATCAAATATGCTTAAGACTTCCTGTGTAAAGACTGGCATGT  
GGACCAAGAGCAGCAAAATATCTTGGGAGATTATTA AAAATGAAGAATCT  
CAGGCCTTTCCCTAGATCAATGGAGTCAAAACATGTGATTTGATAATATG  
TGCATATGATTCAAATATATATTA AAAATTTGAGAAGTATTACTCAAGGAA  
ACTAGCCTCCATAAGCAAGATCCTGAACAAATAACATGTTAGGCTTTCAA  
AAATATTTCAGTAGAGGACTTTTTGGAGGCAGACTTATAAGTAAATGCATT  
TAGAATAATTTAATTA AAAATGGGCCTGAATATATGAAGCAATGTTATAG  
TATTGAAAAA AAAAAAAGACCCAGGTAGATGTATAACAATGGAAGC  
CATAGTTAGATAAGCAATTTGAATTAACTCAGTGTA AAAAGTTAAACAGAA  
GATAAAGCACAGTTGAAGAGACCATTAGTGAAGTGAAGGTATGTATCTA  
GAAATTATTGAGAAATGCAATACAAAGAGGAAAAATCCATA AAAATAAGAAA  
GAAAGTTTAAGGAGCATGAAGACATTACATCAAATGTTTAAAGGTACCC  
CAGAAAGAGAGAATAGGGAAAGCATGGGGTAAGAAATATTCACAGAGAAA  
ATAACTAAAATCATTTTCAGAAATGTTTGAAGACTCAAGCCCTCAGATTAC  
AGACTCAAATATATATTTGAAGCAGTGTTTTTTTTTTTTTTTAAAGAAATT  
CGCAAAACCTTAGGAAAGAACTACACAACCTTCAAAGAGAAAGAGAACAT  
GTTAAATACATCAAGAGTAAAAAATAAAACAAAACAAACAATGGGT  
CACCTACAAAGGAAGGCCAATTAGTTATAGGAATAGAAAATTTCTCAACA

GAAATAAGTGAAATCAGAAAACAGAATCAGAAAACACTCTCTTTTTTCTG  
ACACCTCAGATTATGTGTCAACTTGAAAACAGTAAATCTGCAGATACTGT  
GAGGCACAAATTATACTGTCAACCTACTGTTGCTCTGGTTTTAGACTCCC  
ACTTCATACATTACCAAGAGTCGATCACTGATTTAAAATTTTTAATTTCT  
ATAGTTTGACATCTTCACATATGATCCATGGGAACATGTCTTCCACATAT  
AGACAGTGATGTTACTGACTGATGCATTTGCAATCTGGGGCATATTAAGC  
ATATTTAGACAAATAAAATTAGGCTATCCTGTATATGAAAGTATCTTGAT  
AATATGCATCCTGAAGTGGATTAAAACCTTTCTCCAAAGGAGAAATGTTAG  
TATGTTAACTTAACTTTATATTCTATATTATGCAGTAAATCTTAATAAGC  
TTGCATTAAGCCACCTGCTTTGTAAGTGGATTGATTAATAAAATAACTTAT  
ATTTCAAAAAAAAAACCCAAACCCCAAGATGACATAAAATAAAGACACTTT  
CAGACATCAAAACCTAAAATTAGGGATCCCTGGGTGGCGCAGCGGTTTAG  
CGCCTGCCTTTGGCCCAGGGCGCGATCCTGGAGACCCGGGCTCGAGTCCC  
ACATCGGGCTCCTAAGCAGGGAGCCTGCTTCTCCCTCTGCCTGTGTCTCT  
GCCTCTCTCTCTCTGTGTGACTATCATAAAAAAAAAAAAAAAAAAAAA  
AAAAAAAAAACCTAAAATTACTTATTACCAGCAAATAGTACTAAATGAAC  
TTAAAGTCTTGCTGCGAACTATCTCTTGGACCAGAGTCAGCAGCATGATC  
ATTACCTGGAAGGTGCCAGAAATGTAACATCTCAGGTCTACTTAGAGCT  
TCTCAAACCTTAATGTGCCAAATGTCACCTAGGAATCTTGTTAACATGCA  
AATTCAGATTCATTTGGTCTAGTTTCTGAGGTTCTATGTTTCTACTAAGC  
TCTCAAGTGTTGATCCAATCATCACATTTGAGCAGCAAACTGCTCAGGA  
AGAAGGATATTGCACCCACCTGGAATAAAAAATTATCAAGAAGCCATGG  
TGGGGAAAGGAATTGGTAAATATGTGGGTAACCTAGACAAATGCTCATAT  
AAAACACCAACAAACACAAATAATCTAATAGGTAAATAAAGCAATATGCA  
ACTAAGTAATGGAAAAAAAAAGATGTAAATAGAAATAAGATAATAATA  
GCTAAATAGTTTAAAGGTCTTCATAATATGGGAGAAAGTATAATTTATTTT  
ATTCTTTATTAAGGAAAGCAAAATTGGATCTCTATCTTCCTAAGCAGTTG  
ATGGTAAATGTATATCCTATTTGCTTTTTTATCAGCAAGTACTACTTTGTC  
TCAGCCCACAACATTATATTAATAATTTTCCTGTTTCAGAACTTCCTAC  
CCTTGTGTGCTTCTTTTTTGTCTCATTAGCCTCCATTTTTTTTTTTTTAAAG  
AAAGTATAGTCTAAGATAAATGTGTCCATTTTCATTACAACCTACACATTC  
TTTAAATGCATGCCATCTGGCTTCTTCTTTTACCATCTTAAAGATCTCTT  
TGTTAAAAGTTACCATTGACATCCTAGTTAGAAGATCCAATGGCTCATTC  
TTTGTGGGCTTTATCAATTTCTATAAAGTCTGGCTGCTCGAGGTGTGGT  
CTGTGGAAGTGCAGCATCCATATCACCTGGGAGCTTGCTCTGGTCTCACT  
TCAGACCTACTGAATTAGGCTCTGTGGTTTTCAACATACTCTGGTGATT  
ATATACACATTAATGTTTGTGAAGCACTGCTGTAAATGTTTCACATTGA  
GGACTACCTATGGGTCCTTGAAATTCCTCTCTCTCCTGTCTTCTACTTTC  
CTCAGTGTTGTGCCCCAGATTGCGAATCCGAGAAACCACCAAGGAGCCGA  
CACCGATGCAAGCACACGAGGGTTTATTAGCAAGCTCCAGCTTGGGTCCA  
AGTAAACCCGACACAGCGGAGCAGGGACTTGACCCCGAAGTGGGTACA  
GCTGGGTTTTTTATAGGCTGGTCTAGGGGATTTTCAGAAGGGGTGGAGGA  
ATTTCTCAAGTTCTGTTTACATTCTGATATGGGGCTTTCAGGGCATTGA  
GCTCTGTTCTCATTCTAATATGGGACTTTCTACCACGGGCGTGGGCTCTG  
TTGTCTTTCTGATATGGGATTCCCTGCCTACGACATTCTGCAGTTTTTCC  
GGTAAAGTTCAGCTCTAATTCACAGGGGCCTAAGATGGCTGTACTAGTGC  
TAATGCTAAACTTTAGGTGGAATGGCCTTAATTTTTCTTGCCCTCCACAC  
TCATTACCTTCTTCACTATAATAATATATATTTTTTTCATTATCTCTAGCT  
ATTTTCCTCCTTCCATTACATAGGTGCAGGTATCCTCCAAATTCATTATC  
TTGGCCCTTGACTTCCATTCCAACCTCACTTTCTCTCTCCTTTCTCTT  
GATAATCTACTCCAGTTAATGTCTTCCATTATCTTCCTAGATAAGTCATT  
TGTTCACTCTGAGTCACAGAGGCTTCTTGTTAAAAATAAAATTTCAAGAGA  
CCCTCACTGGAGCTTCTAAAACCAGCAGGTGAGCAGCCTGGGTGATC  
AGCGGTTTGGAGCCGCCTTGGGTCCAGGGCGTGGTCTTGAGGCCCGGGA  
CTGAGTCCACATTGGGCTCCCTGCATGGAGCCTGCTTCTCCCTCTTCCT  
GTGTCTCTGCCTCTCTCTCTCTCGGTCTCTTATGGATAAAATAAAATCT  
AAAAAAAAAAAAAAAAAAAAACAAACAAACAAACAAACAAACAAACAA  
CAACAACAACAGAAAAACCACCCAGCAGGTAGTTTtaggaccCAGAATA

TGCAGCTTCAAAAGCATCTTCCCTGCCCCAAGTAATTTAGAGGTAGTCAG  
CCCATACATTTTTTATGTAATTGACTAGAAAATGATTATGTAGATGTCCAA  
TCTTGACTATGTTATTAGTCACTCTAGGGCAAGTAGAAATAAACCCCTCAA  
ATACCATTGACTTAAAGCAATAAGAGTGTGTTTGCTTGCTTACGTCATAG  
TCCATACTGAAGGTGTCTCTGTCCCTGAATGTGACTCAGGGATATGGGTT  
CTTTGCACACTTGTCTCAGCCATCTCAATTTACTTCACTTCCAGTCATTC  
ACAAGGCAGGGAAAGAGAAAAGAAGTAGAATGATACACAAGTTTTTAAGGAC  
ATACCTGGAAATGGAGTGCCTCATTCCTGCCCTCATTCTGTTGTCCAAC  
AGTCACATGACTACAACTGCTGGGAAGTACAATCTTCCTGTGTACATAG  
GAAGAGTAAGTGAACCTTATGAGCATTTAGCCAGTCTCGGTTTTCAACCCTT  
CATCTCTGGTCTCATGTTTCCAACCTGCCACTGGATAACTTCTGGAATCA  
ACTGCCCATAGGATATCTTTTCTTGAAAGTTCAACTAACATAACCAAGTC  
ACTATATTTGAAACAGAAAGTAATCCTCGAATCTCCACACCTCCTTCCCAG  
ATTGAGCTTCCTTTTAAATTTATTTCTTTTGTCAATGCATCACCATTCTAG  
GCATGGAGGTGATAAGGGAGAGCTTGGTTCTTGTCTCACAGGGTCTAAGA  
ATGAATCTCGCAGACAAAAAGAGAGTGAGTAAAGTGAAAAAGAGTAAAGT  
GAAAAAGAGAGTGAGTAAAGTTTATTAAGCAAAGATACAGATAAAGCTC  
TCAGAAGTGAGAAAGGTCCCAACAGGGTTGCCACTGAGGGCTTTTTTTTT  
TTTTTTAATGGAAAACCTGACTAAGGAGTTGATGAACTTGAGATTTCTTG  
TGCCGTTTTTTGAGTGAATGACATATGACCATTTTAAGTCTTGTTGATGAC  
TTGATAGCCATCAAAGGAAGATACTCCCTAGCATTTTGGAGCCAAGAGGC  
CAGATTTACTTCCTTATCTCTGTTTCTGTTGCTTTATCTCTGTTGCATCT  
CAATGTTCTTGGGATTTACGGGAACCTGACTCTGGGGCCTTTCCTTACC  
TTTCCCTACCTAGCCCTATCTGTCCCTAACTCAGAGGCTTAAAGCCTGGA  
CACCTCCTTTATCTCCACTCTTCCACATAACCATGTGGAACCATGACAA  
CTATTTGCCAAATCCTATTGATGTAGTTTTGAATGTAGATAAGGTCTGGA  
GCTGATGGCCAAGAAAGAATCTTGAGACATCTTCATGCAAAATGGTGGT  
TTTATCAAAGCACGGGGACAGGATCTTTGGGCAGAAATAGTTGCCCCAGG  
GTTCTGAGGGGTTCTGATTATTTACTTGGGAGTTGGGGAAAAGGAAAAAG  
AAAGGTTTTCAAAGAAGCTTTGTATGCTAAAGAGGACCTACAAGGTATTG  
GAGGTCTTGCCATTGTCAAGTTAAGATTGTTTTTACCTCTAGCAATGTAT  
TAACATTAAGAAAGTTGGGAGCTTCCTTAGTTAGGTATTGATAAGAATA  
CTTTTTTCCTTGTAATCACTAAAACATTGTCAACTGAGGGAGACTCTTT  
TGCTGGACTGTGATCACTATTAGTTAACCATTTGTTTTCCCTTCTCTTAG  
TTTTAGGGAATGCAGGAATGCGTTCTCTTTTTTATTTTCCCTTGGCTCTG  
TTTCTCATTGGCTAGATGGCCCTTTATGGCTCTCCTTTGCTTGGTATAAA  
TACTACCTAACAAATTACAGAGCACTAATCACATGTCAAGTGCTGGGTAAG  
TATTTTACATGAGGTGAATGTTATTATCACCTTTGTGAGTGTGTGTGTGT  
GTGTGTGTGTGTATGTGTGTGAATAGATAAACAAGGCTCAAGGGTAAAGT  
AATTTTCACTGGCTGGCAAATGAAGACTAAGGATTTAAAACCATGTCATT  
TGTAGGACCTCCTAAATTCTAAAGTCCTTGTTTCATTTATAAACAACTA  
CTTCATAATATCTACTCCTTTACAATCTGCTCCATCCTCTTTTGAACCTA  
ATTGAAACCTGGATCCCTCCTGTGGATCCCACTTTTAGGAAGTCCCACC  
TTGTATTTGGTTCCTTGTTTATTCACACAGAATGGGATACACATAGTTCAA  
AGTTAGGGTAAGTTTTCTCTTATCCAGAGACTTTCTATCCTCGAAAACAA  
AACAAAACAAAAGCCTTCTTTTCCCTTTATGGACTAAATTATTCATCTATA  
TTTCTCTCAAATTTTCTTTATGAACATGTATCAAGTTCTTTACTAATAAA  
ATCATTCACTTTTATTTTATGATGACTTCTAGTCATCTAAATTTTAGTA  
GATCCTATACTCCCAACTTTGAGTAGGTGATGCCTATATCAATGTAAATG  
TCATAGTAAACCTAAAGGCTTGTATTTTCCCTTAAATTTTGAACATTTACT  
TCATCTTTGCTCTTTTCAACAACCTCTTCACTCCCATGATTGACTTGTACA  
TTTGTATATTCTTACTTTTTTATTCTAATATTTATATCATAGCTCTCCA  
ACTTTGAATTCTCTCATTTTCTTACTACATATGGTCTTTAAATTCATGTGAC  
TGCTGGTCCCAGGACCTCTGTATATTTTTTCCAATTTATCAATGTGAAGAA  
AAAAAAAAAAAAACCCACAAACCTAATCCTTGTTTTTATTGTTTTTCTATTT  
GAACAGTATTGGGCAACTGGAGAAAATCTACCATCATGCTGATTGCCACA  
TTTCATTCTCTTTGTATTATTACCCTTCATAATTCCTTTTACTTACCCAC  
TAGTACTCTGTACACTACTTCCATACAGCTTCAGCCTTCTAGTCAAAGTT

TCTACCGAAGTTTTTTTGTCTATTCCATTTCTATTTCATGTCTACAACAA  
TTTCTTTCTCTAATTCTTGTATCTCCAAATCCTCATTTGGTCTTTCTACC  
TAGCCACCAGCATATCAATCCACACATCTTTCTTTTAAAGAAACAAACAA  
AAAATCCTCCATCTGTATTGAATTCTAGTTACTGTCTCTAGTTTGTTCCT  
CTGTTACTTGTTCCTGGTACTAGTAACTATACTATCTCTACTCCTTCA  
TCTCTGACATAAAGATTTTATGCTATAGAGACCAGAAAGCAACCTTATAT  
GTAAAGAAGTAAGCTAATTCTATAGACATGCATTCTTCATTCACTAAACA  
AAGGCCAAATATAAATACATGTCAAGCATTTTATTTAACAGTAACTCATT  
ATTAACCTAACTTAGGGGCACCTGGGTGGTTCAGTGGTTGAGTGTCTGCCT  
TTGGCTCAGGTCATGATCCTGGGGTCCTGGGATCAAGTCCCACATCAGGG  
TCCCTGCAGGGCCTCTCTCTGTGTGTCTCTCATGAACACACAAATAAAAC  
TAAAAAATAAAAAATAAAAAAACAAAACAAAACAAAAAACCCCTAACTT  
ATTCATCATTAACCTAATGGGTAGCACAAATGGGATGTTGTGACTGATTTA  
AAGTACAGACACATGTGTTCCCTATGCACCTGTACACACATAGGTATATAA  
AAATTAATAAAAGAAAGTTAGATAAGATTGTTGAATCAGGGACAAAACCTG  
GTTAATGCCATACAAGGAACATACTTTTGGGGATTACCACTTCAGTGGT  
CAGAAGTCATTTGGATCGTTACTGGACAAAATCTACACCTTCATCTCGG  
CCTGTACAAAATAAGCAGACAATAGAAAATTAAGCCTAGCATTTCTCTGA  
AAGAATTCCCAGTAATCTCTTTTGCCTATTTTAAAGTTTACATTATTTT  
TTGACTATTTGGATTATTTTTCTAGCATTTCCCCCTTGCCCACCCAGCTCC  
TGGGATCATAAATAATCTTTGAAGCTTATTCTTCTGACCAAGAAAGGCTA  
GTTTTGCTACATTTGGCCTGTAGCAAGAGTATAAACTAACTGTATAACTC  
TCCATGAATTTATAACGAATATCTAGAACTTATAGTATTGAGTAAACAC  
AATTGCCAAAGAATTTGCTTTGTTTGGAAAATTTCTCAAGGAATCTCAAT  
TAGACTTTTAAAGCCTGTCTCATTTACTTCTCTATCTGGAGGCTAGGAAAC  
CTAGCCCAAGGCATTTGCTCCACCAATTTCACTCACAGTACTTATGAAT  
TTGGGTGGATTCCCTCTCTTCTTACAGTTTGCAAATTCTTCTAAAGTTCCCT  
GACCTTCCAGGAAGTGGCTCCTTTCCTACCTGTGAGCCAAGTCCAGGTCC  
CTGTTCTTGGAATAATTTTATAGGCATTGGTTCCACATATAAAGTCAATC  
CTTGTTTCTAAATACTGGGCTTGTGACACCTGATTAAATGAGACTCATTC  
TCAAACATGGCACTCCTGTGTGATCCTGGTTGCACAATTCATTTGTCAAG  
TTGTGACCTGGTATAAATGAGGACAGCTTTTTATGAAGCTCAGTAAAAGT  
ATTCGTTCCCTGAATTATGAGAGACAGTGAGATGTAACACCACTTAAAAAT  
GTTTTATTTAGTTTTTCAAATGCCTACTAACTGATATCCAAAGGTGAT  
ACAAAGAAGGAGAAAAGACCTCTCCTTCATCCATGAATATTAATAAATAG  
TGCTAACTATATTACATATAAAACAAGTAAGCTTTTCTTATTAGCTCATT  
ATGTTCTATGTAATATATTCATGTGCTGGATATTGAGAGTGAATGGTCTG  
CTTTCATGAAGTATGTCTGCTTCTGGACTAAAATGAACACTGGAAATCCT  
GAGTCAGACTGCTGAAGCTTCTGAAAATTGTCTAAGCAATGTTAGCTAA  
GAAACCTGTACCCAGAGCCTATTTTGGACATATAATAAATTCAAATAAT  
CTCTTTACAAGACTCTGAGATTCTTCTTTTGAAGATACAAGTTTCTGTAA  
TTTATAGTAGAGACTTCAGGCAAGCACACAGGAAAACAAAACTAATTT  
GATAGTGATATGAGAGGCTGTGACTAATTTATTACAATAACCAAAAATAT  
AAAAGTGGAGGTAAAATTCTACTGGAGTATGTTACAAAACATTTTCATGGA  
GAGTAATTAGTATTTTCCCTTGAGGATAAGAATATATTACAAACAGAATAT  
GGGAATTTAAGAAACAAAACAAAGCATGGGGGAAAAAGAGAAAGAGAAGG  
GCAAACCAAGAAGCAAACCTTAACATAACAGAATAAAACGATGGTAATC  
AGAGGGGAGGTGGGTGGGGGATGGGTAAACAGGTGATGATAATTAAGG  
AGTGCACCTTGTGATGAGCACCAGGTAATGTATGGAAGTGTGAATCACTA  
AATTGTACACCTGAAATTGATATTACACTATATGTTAACTACATGCATAT  
ATATATATGTATATAGTTATATATATAGTTATATATGTAGTTAAATTTAA  
ACTTTTTTTTTAAGATTTTATTTATTTATTCATGAGAGACACAGAGAGAG  
GCAGAGACACAGCAGAGGGAGAAAGCAGGCTCCATGCAGGGAGCCCGATGC  
GGAACCTGGATACTGGGACTCCAGAATCAAGCCCTGGGCCGAAGGCAGGCG  
CTAAACCGCTGAGCCACCCAGGCATCTCTAAATTTAACTTTTAAAAAAG  
AATATTTATTATGAACAGAGAAAGCATTAATAATATCTAGGGCTTTACCA  
TAATACATACTATATATATATAATGATAAATAGATGGATATATATTTACA  
TATATATATATACATATGTATGTATATATAATATGGGAGAGCTTGGTTCT

TGCCTCACGGAGTCAAAAATAAATCTCACAGATGCAGGGGAGTAAAAGGA  
TAGAAGTTTATTAAAGTAAAGACACAGAGAAAGCTCTCTGGAGTGAGAGGG  
GTCTTGACAGGGTTGCCACAGAGGCTTGTAGGGTTGGTCTTTTATTGAGA  
GCCTACTCAGGGGACCTAAATCCTTTTAAACATATCCATTGATATCACCAC  
TGAGTAAGGACTAGTGATAACATCTTTAATGGCTTACTTCCTTTTTAGAG  
TCTGATGATTTTTTTTTTGGTTGTTACAAGTAGCTGTTATAACAAGACACCC  
TCCCTGCCCACACCTTAGGGCAGGGTGATCTGGCTTGTTCCTTATCTCT  
GGTTTCCTTATACCTCAGCATTTTGGGGATTTTTGTGAGCCTGATTCCGT  
GGCCCCCTATCTAGCCCTGCCTAGCCCCACCCCATTTGTCCCTAACTCAT  
ATATAATTCTATATATATATCTATACACATACAGAATAATTGTATTTTAG  
TTACATTAGCTTAATCTGGAAATGGCTGAAACATCCCTTCTGATCTGACA  
GTTCTTCCTATGTAGCTTTCATGAAGGTATTGAGTTCATTAAGAAGCATG  
GCACATATGAGACAATCATATTTCTAGTATCTATCTTTTCACAAGATGAA  
GGAAAAAAAAAATCACTGTGATTTTCTGGGGGGGAGGAGGGGGGGCTAAG  
AAATCCTAAAGGGTTTTAGGTTGTAAAAGATGTCTTGAGTTTGAACCCTA  
ATTTTCAGGGTCTGATCTTGAGAAGACAAAATTAAATGTGTTAACATAGGA  
GATTTTGTACCTGACTATAACTAAGCTTATGAGGGAGGGGGGGCTGAGA  
AAAAGTAATTGGTTATTTATTTAATCAAAGTAAATGACATTAAACTATT  
TTAAAATTAACATAGTTAGAAAATGATTGTAAAGAACTTTACTACAAGTA  
GGAATGTTTTAGAAAATAATTAAAATCATGATAAAGTAAACACAAATCAC  
AGGTAATTATGGTAAGATATGGAATCTTTGTTATCTGGGCAGATTACACA  
GACAATAAAAAAACTATCAAAAAAAAAAAAAAACACCTCAAAATGGATC  
AAAGACTTAAGTGTAAGACCTGACACCATAAACTCCTAGAAGAAAACAT  
AGGTACAAAGTTCCTTGACATGGATCTTGGAATGATTTTTTGGATATGA  
CACCTAAAACAGAGGCAAACAAAATACAAAATACACAGGTGGGACTACA  
TCAAACTAAAAGCTTCTGTAGAACAAGAGAGACTAGTAACAAAGTGAAA  
TAATGAAATGGGAAAAATATTTTCAAACCATAAATCTGATAAGAACTCC  
AAAATATATAAAGAACACCAACAACCTCGATAGCAAAAAGCAAACAAACAA  
AACCTCCCAAATAACCTACTTTAAAAGAAAAAAATGGGCAAAGACCTGA  
ATAGACATTTCTTCAAAGAGGACATGTGAAAAATCAGACAGGTACATAGA  
AAGATGCTCAGCATCACCAGTCATTATGAAAATACAAATTTAAACTACAA  
TGAGATACCACTTCATGCCTGATAGAAAGGCTATCATCAAGAAGATAGGA  
GATAACAAATGCTGGCGTGGGAGTAGAGGAAAGGAAATCCTTGTGCACTG  
TTGGTGAAATTGTAAATTGGTACAGCCACAATGAAAAACAGTTTGGAGGA  
TCCTCAAAAATTTAAAATAGAGTAAAACACAGATCCAGAACTCCATTT  
CTGGGAATATATGCAAAGGAAACAAAAACACTATTCTCAAAAATGGAATG  
GATACCTATTTGAACGCCCATATTCATGGCAACATTATTTATAATAGCCA  
AGACATGGAAACAACTGAAGTGTCCATTGATAGACGAATGGATAAAGAAG  
TTGTAGAGAAATATACACATTGGAATATTATTAGCCCTAAAAACCAAG  
GAAATCCTACCATTTGTGACCATATGGATGAACCTCGAAGGCATTATGCT  
AAGTGAGATAAGTCAGAGAAAGACAAATACCGTATGACCTCATACATGGA  
ATCTAAACAAACAAACAAACAAAAATAAGTATAGAAAAAGACTTATAA  
CCAAAGGCAGAGGGTAAAGGGAGGACTACTGGAGGAAGGTAGTCAAAGG  
TGCAAACCTGTAGTTGTAAGATAGATAAGTACTAGGGATGTAATGTACAA  
AATGTTGACTACAGCTAGCACTGCTATGTAGGAAATGTGTGAAGAGAGTA  
CAACCTGGGGCACCTGGGTGGGATACAGCATCCGACTCTTGATTTTGGCT  
CAGGTTATGATTTCAAGGTCATGAGATAAAGCCCAGTGTGAGGCTTTATG  
CTCAGTCTGGAGTATAGCTGATATTCTCTCTCTTTCTCACTCTCTCTCTGC  
CCCTCCCTTCGCCTCCCTCTCTCTTAAATAAATAAATAAATAAATAAAT  
AAATAAATAAATAAACCTTAAAAAAGACAGAGAGAGTAAATCCTAAGAG  
TTCTTATCACAAAGGAGGTAGAGAAGATGGATGTTGGCTGAACCTATTGTG  
GTAATCATTTTACAATATATGTAAATCAAACATACACGCTGCATGTTTAA  
GGCATTTTATGCAGTGATGAAGGTCAATTATTTCTTAATAAACTAGAGAA  
GTAAACCCAACTTATTACACCCCTTGTTAAGAGCTCCAAGAACAATTTA  
TCATTTTAACCGAGTAAAATGGTTTGAATTGTGCTTTAATATACTTATTT  
GGCAGTAAAGAGTTCACCAGCTTTTTTCCCCTCCTTTAAATAAACCCATT  
AAACAGAGCCAATTTTGGCAAAATGTTAAACATATCTAACAAAGATTTA  
TTATTTATTTATTTATTTATTTATTTATTTATTTATTTATTTATTTATTT

CAGAGAGTGAGAAAGAGAGAATCTCAAAGTAGACCAGAGTGGAAACCGAG  
AGTTGGATGCATAAATCAATGGAGCCACCCATGCGCCCCCTTAACACATTT  
TTGTTCTTTCTTTTCAGACTCAGGATTTGCAGGTATTATAAACCAAAACA  
AATAAGAATTTCTTTTTTGCAAACTTTTTCCAACCTTCTATATCCATTCA  
TACTTTGTCCCTTACTATCATTTTTTCATGTTCTGGAACAATCAAGCATGT  
AAAGAGAAAACCTATTTCCTTTTACCTTGATAAACTTCCCCCTCATTCAATGA  
CCTTGCTTATGTATTCATACTTTCCTGCTACCATCACTTATGTCATGTAA  
TTTCATGTTCTGAAATATATCAATTGTAAGTTTAAACCAAAGCAACTAAC  
TTCTACTTTCACAGACAAATCCAAAAGGTAAATAATTACTAGTCTATGGTG  
GTATGTTTGATGACTTCAAGGAATGGCAAAAAACCATGTTGTACATAATG  
CATCAAATAGGCATGAAGGAGATCTGGGAGCAGGCATAAAATTCAGGGGG  
GAAGGGTCACTGATTGTCAGGAAGCACTTCCACAAACCTGCTAGAAATCT  
ATAGACATAGATTTTCTTTTTTCTCAAGATTTTATTTATTTATCTGACACA  
CACACACAGATATAGCACAAAGTAGGGGGAGTAGGGGCAGGCCAAGGAAGC  
AGGCCCCCTGCCAAGCAAAAGAGCCCAATGTGAAACTTGATCCCAGGACCC  
TAGGATCATGACCTGAGCCAAAAGGCAGACGCTTAACCAACAGAGCCACCC  
AGGGGTCTTGACACAGATTTCTCTTCCACTTCTAAATACAGATCTGTTAT  
TAAAGATTAAACAAGGGTCTGTATATCTGCATCCAACAGGTGGGGGGAG  
GGTCCATTAAAGCCTTCTTTTTTTTTTAGGAAAAGAATTGAAGTGATTAG  
TTGTATCTTAGGAATATAAACATGGGGATCCCTGGGTGGCGCAGCGGTTT  
GGCGCCTGCCTTTGGCCCAGGGCGCGATCCTGGAGACCTGGGATCCAATC  
CCACATTGGGCTCCCGGTGCATGGAGCCTGCTTCTCCCTCTGCCTGTGTC  
TCTGCCTCTCTCTCTCTCTCTCACTGTGTGCCTATAAAATAAAATACT  
TAAAAAAAAAAAAAAAAAGGAATATAAACATGGCCAAAAGTCTGTTGGTTGG  
ATTGGAGTGGATAAAATGAAGAACTAGATATGTTAGTTATATGGAAAAAG  
CATCAGATAAGGAATGCAGAGACACAAATTTAAACCACAGACACACAATT  
TACTAGCTTCATGATCTTGAGCAAACATTTGATCTGAAGTTTTTCAAAC  
GTGGGATGCAACCTAACAAATTTAGTTAGTTGTGATCAGCATTTTACAAAT  
GGAATAGAATACTATAACCTGCAATAGATACAGAATAGGAGGGTGCTTTG  
TAAGGATAAGTACTGTCCCATGAAATTTTGTTTCATATGTAAGTGTACAAT  
ATATAGCTATATATGTGCCTACCATGTTACAAAGCAAAATTCATTTCTTA  
CCCTGGGTTGTCTTTTAAAAAGTTTACTTTTGGGGTGCTGAGTGGCTCA  
GTCAGTTGAGCATTTCGCTCTTGATTTTCAGCTCAGGTCATGATCTAATGA  
ATCTGGAGATGCAGCCCTGTATCAGGCTCTGTATGCAGCAGGGAGTTGGC  
TTGAGATTCACCTCACTCTCTCCTCCTCTCTCCCTCCCATTGCTCGTGCTC  
TCTCTCAAATAAAAAAATAAATCTTAAAAAAAAAAAAAGTTCCATTTAGTG  
TCTGTATTTTCATTAGCGAAGTAGAGAAGGTAAAAATGTCTGCTTCTATT  
TCTCCATCATAACAGTATTGAAAAGAAAAAGGATTACTAAAAAGGATAAGC  
ATAACAGCATTATATAAACAGTGAATACAAATGAACAAGGGGTGATGAC  
TATTATTATTACTTACACCAATTCGACTATTCCAGCTAGGATGTAGTGAA  
CTCTTAAATTTCCATGCTCATGCTTCAGAGGGAAGAAAAAGGAATGAATG  
AATGTGAGACCTTGCTTGCTTATTGTTTTGTGTTTTCATTTCCCTCCCTAA  
ATCCCAATCAAGATTCTATTGTATATAGTGTGGTGTGAAGTATTTAAAA  
TAAAGATGATTCTGGTGTGAGGGACATGGGTGACACACACATAAATCATT  
GAAGGAGGGATTTATTTTAAAGGGTAATTATTTACATGCTTTAGAAAGTTC  
TTATCCTAAATTATAATTGTATTATCACACCTCTGCCTTGTCTCTTCAAC  
TGTAACCTCTTAACCTCCTCTCTGAAGCTAAGACAATGTCTTACACAGAG  
TAGATCCCCAATTCATTTTTTGCTTATACAGTATTCAGAATGAGCTTTTAA  
ATATCTCATCATTTCCATTCCTTGCCCTGAAATACTTCTAATGTTCTCCAGT  
GGGAACCTAGAATAAAACCTTGAATTACAAGGCCCTTCGTCATGATCCAGC  
TCCTACCTCCCCCTCTGACCCCATGTTCTATGAATTTTCATGTTGTCCACT  
TGACAAGTCATACTGGCCTTCTTGCTCTCTCTCAAACCTGGTGCACCTGT  
TCCTTCTTGAGTCATTGCACATTTTGTCCCTTTGCTCAGCAACTCCCAC  
ATTATATTCACTGTTCTTTTCTGCTCTTGACCTAGAATATTTAACAGAT  
GTGATACTTCAGCGGCTTTACTCACTATTCACTCATTAGCAAAAATAAAT  
AAATAAATTATCTCTGAAATTGCCTGTGGCTGAGTCATTTATAAACTGT  
CACATGCTTTATAGGCTCTTTCTGCAAAATCACCTTAAATAAACCAAAGG  
GAATGGGCATAAGAAGATATTTTACAACCTTTGTATGTTGTGTTTTTGT

TTTTGTTTTTTGGTCTTCCTACATTCTCTTTGACTTGGTCTCATTTCTAC  
AATCTTCTTCTTTAAATGCACTTTTATCAATAATATTCTGCCCTCAGACT  
TGTTTTTTGGATAACTTTGCAAAATAATTTCTTCATCTCAGAGAGCCTCAC  
GGAATAACAGAATGGTAAGGTACGTAGTAACCCTAGAGCTTGTTAATTGT  
TGGTAGTAACAGAGATTGATATATCCAATAATTCCAGCAAATTTAGAAAT  
CCAAGCATAAACCCATTAGAAATCCATGAGTCAAACACTACAAAATTTTA  
AGTCCAACACCCTGAATTTTTTTAAGATTTTATTTATTTATTCATGACAG  
CACAGAGAGAGAGAGAGACTGAGAGACAGAGAGAGAAACAGAGAGGCAGA  
GACACAGGCAGAGGGAGAAGCAGGCTCCATGCAGAGAGCCCGACATGGGA  
CTCAATCCAGTGTCTCCAGGATCATACCTTGGGCTGAAGGCGGTGCTAAA  
CTGCTGGGCTACCCAGGCTGCTCCAACACCCTGAATTTACAAACGAATAA  
AATGAATACAAGAGAAATGAAAAATATGCCCAGAGACAGACAACATAACA  
TGCCCCAAGACTTCTAAATCTTCAGATGCCTCATCACACAATGCTACTTTG  
TAACCAAGTTACCATTAGTCTAGAATCAAATTTGGGATTCTTTTGTGCCA  
AATGAGAGTTTTCACTACTAATACATCTATGATAATTTTTTAACCAATGTAT  
TGGTATGTTGACATACACCAGGATATATATTAGGATATCAATATATCAGG  
ATTTATTTCATTTTGTTTCTGATAAGAGAAAAATTATTTAATATTTTAACTA  
TCTATAAAATCCCCATTGTCACTGAAACTTCTTAATATCTATAAAGTAAG  
AATTTTCCCTTGTTCTTAAAGACAATCCATTTATTTTACCTACTCATGA  
TATTGTAACAAAATTGTTTGAATTTATACAGAAATTTTTCTTTAAAAAAA  
AAGCTTATTCAAGTTAGTCATAGTTTGGATCTTCTGGGAGTCAAGTTTTTC  
AAAGACAAGGTTTTGGGTAAAAGTCTTTTGTGTGTGGGGTACCTGGGTGA  
CTCAGTGGTTGAGGCCTCAGGTTGTGAACCTGGGGTCTGAGATTGAGCC  
TTGCATCAGGCTCCCTGCAGGGGAGCCTGCTTCTCTCTCTGCTTTATGTC  
TCTGCCTCTCTCTGTGTCTCTCATGAATAAAATAAAATAAAATATATT  
TTTTAAGTGTTTTGTTTGGGAAGTGTTCCTAGGAAACACTAGTAGGGGAG  
AGAGTGAGAAAGAAAGAAAACCAGCAAAGGATATGTTATTAAGCTTGTTA  
TTACTATAGGCAGGTGAGTTCAGTCCCTGCTGGAGAACTCTAGGAGACTGG  
TTTAGGATCTAATCTCAGAACTGGCCACCTAAGGAAAAAGGTGCTGTGG  
GTATTTGTCCAATACATTGTCATTGTTGGAAGTCTCATTCCTGGAGACATT  
TATTCTTCCGGGGTCTCAGCTTGCCTTGTGTGCAAGCTGAATCTAACCTT  
TGGGCAGAAAATCTCAGGTGTTTACAGTGATAGGAAGGTAAATGCTGAAG  
TCATATGGGTATAGCATTGATGATGTCTGCTATATTTTATATCTCATAAC  
CATGTGACATATGCCATGATCACTAATATTTATGTGACTAGTATAAACGA  
AGCTGCTCCATTGCACAGACTTAATTTAATATTAATCAGTCACCTCCAA  
ACACAAAATAATTAGAAATCCACTTGAGTCCCTACAAAGTTTCTGGTTCC  
AGGTAAGATGGAGTAAGGACATAGTACTCTGTTTTTTATATTTACTGTAG  
ACACAAACCTTGAACAAATTGTATGGAGCAGCTCTCTGAAAACACTACGAAA  
AGTCAGTAGAAGATAAATTGGGGAAGGGGAGACAAGAGTTCAATGTACCA  
TTGAGCCCATAGTGAAGTTACAAACGTTTTTCTTACAATCCTCCAATCTG  
AATGAAATTGAGCATGAAAACCAGAGTAGGCATTGGAACAGACAGAGAAG  
CTAGAGTAGACATCCGCCAGGTCTGCCTCCAGGAAGGAGAACTGACTATG  
AGAGAATGCAGAAATCGCTCTCTGTTTTTATTTCTGCTTTTCTTCATTCT  
TTTACATTTTACCCCTGAAGCAATTCGATATCTTCATAACAGTGAAGGTC  
AGCAAGAACGAAAATTCTAGGAGAAGGGAATTTTTCTCTTTGATTAGTAC  
TCTGTGATCCCAAGAGGATGGAGGCAATAAACAAAAATAAAGTAGAGAGG  
ATGAGAGTTAGAGATCACAGATAGGTTAAAGGTCAGGAAAGTGACCCCAT  
AAAAC TGTTTGTGAAC TGTTTGGGATAACCATGACTGTTTTCATAGA ACT  
TATTCTAGT CATAGG CACTCTGAGAACTGAACCAACAGCAGGCCACAAC  
ACACATGGGACATATCCAAATAGCATTCTAAAGACTTTGAAAACCAAATT  
CACTTTGGAACCAAGCCTTGATATAAAAGGTGGGTAGAAAGTTTCAGCT  
TGAATCTAACGAGGTTAATTTCCCTACTAAAACAAAAATATCAACATTTTC  
CATAGA ACTGGAAAAAGATACAGGGTCTCATTATATACTATTCAAAATTA  
ATAGTACATAATCCAAATAACTCAGCATACTCCAATTAGGAAAATCTCA  
CATCACATGGGAAAAGATCACTGACAGATGCAGATAATTAAGATAACAGA  
CACTGGAATTACCTGACAAATATTTTAAACCAGTAGTATAAATAAATGTT  
CTAATAAGCAACCACAAGCACTCTGAAACGAGAAGAAATATGAAGTCTTA  
GTGAAGGAATAGAAGATATAAAGAAGAACCAAGTGGAATTTTAAACTA

GAAAAGTCACAGTAACTGAAATTTAAACAAAACAACACAACACAACCTCAG  
TGGAAGGGCTCAATGGTAGTTTGGAAATGATAGAGGGAAGAGTCAATGAA  
TTTGGAAATAAACCAATAAGAAATATCCCATCTTAACATCAGAGAGAAAA  
AGGATTGAGAAAATGTAGGACAATAACAAAGAGTCTAATATTCATGTCAT  
CAGCTTATCAGAAAGAGATAAGAAAGAAGGCTATGCCAGAAAAAATATAT  
TTAAAGAAATAATAGCCAAAAACTTCCCAATTTGGCAAGAACAAGCTCAT  
GGTTTCAAGAAGCTGAGTTGACCCCAAAAGGATAAGTTTAAAGACAGAAA  
CTCATGTCCATATTCATCATAATTAAGGTACTGAAGACAAAAGGCCAAAA  
CAAAATCTTGAAAGAATTTAGAGAAAAACAATGCATTATCTATGAGGAGC  
AATGATTGAATTCCTGCAGATTTCTCATCAGATAGCACAATGAGCAAAAA  
GAAATAGCGTAACATTTTTTAAATGATGAAAGAAAAACATTTTCAACCCTG  
AATCTTTATTTCAGCAAAAAAATATCCTATAATAATGAAGGTGAAATAAAG  
GCACTCTTACCTTCTTGAGGTTTAAAAATAGATTTAATAGTTGAAAACAA  
AATTGGGGCTTTTGAAGTATGTGGAGGCAATATTTGACAACTATGGCAGA  
AAACCTTTAGGATAATAAGGTTTCCATATTCAACTTGAAATGGTAGAATT  
TTGATTATAAGTATAGGGACAAAAGTTAAGTAGGTATACTGTAATCCCTA  
GAATAATCACTAAAATAACCCACAGAAAGGTAAAATCAAAATCTCGATA  
GATACATTTAAATGGAATACAAAAAATGGGGAGGATTCAAATAAGCTAAT  
GGAAAAGAAAGAAAGGGCAACAGGGAGGGAGGGAAATGGAAGGAAGAAAG  
AAAAAAAAAGAATTTAAGATGGTAGACTTAACTCTAAGCATATCAACAAT  
TGCATTTAAATGTAAATGTCTAAATACAGCATTTGAAAGACAGAACCTGTT  
AGAATGGGCTTGCAAATATGATGCGATTCTATGCTGCCTATAAGAACTT  
TCTTCAGAAGTCAGAAAAATGTTATTATGATCACACTCATATCAAACCTG  
AATTACACAAGGCCTCCTAATGAATTCTTCTTATCTCATCCTTCCATGCA  
TATTTCTCACTGCTCCACATTCAACTTCCTCAAATATTATTCTTGTTATA  
CAGTTTCTGTTGCCTATGATAGGGCCAGGCACATAATAAGTTCTCAATG  
CAGTCCCATTTAAATAGGAAAGTTAATCTTAAACTTTATTGACTACAAATG  
CCTGAATAGCATTTGCTAATTTTCTTAAATCAAAGTGGCTTAATGCAGGT  
AGAAATCTAGGTGAGAATAGGTTCTAGCCATCTCACACTTTTCCACAATA  
GTCTATCTTATTACGTAAATTTAAAAATGAAATTTATTATCACTAATAAAA  
TATAATAAATATATGTAATGTATATTATGCTATACTTAATATTATGCTAT  
ACTTAATAAAGAAGAGTAATGTGTTTTCAAATTTTTTTTTTTTAAATCGAGC  
ATGCCACCAAAGAAATATTTGGGTTTTTTTTTTTTTGTGTTTTGTTGTTT  
TTTTCAAAGAAATATTTGAATTAAGATGCCTCATCAAGTGATGAGTGAA  
CCAAACTGATCAATCCTTTTCATGTATCTGGCTTCTTCTTCTTCTTCTT  
TTTTTTTTTTTTTTTTGTATCTGGCTTCTTAATTGAGGTTTTTGCTTAAT  
AACAATATTGATCTCATCTAACCTGAGATCATTTTCTAAGGGACAGATAC  
ACACTATGTGCTTTTCATTCATTTCCCTTGTTGAATGAACAAGCTACAGGG  
TCAGTGTAGATAGAAAAATGGGTAACTTTAAATCAGAATACCTGAATTT  
GAGGTTCAAATAACTTTATTTACAAATCTCTTATGTTCTTTTGAGTCTTT  
GTCTTGTTAGATGAAAAATGGCAATGATAATACTAACCCATTATGTCCC  
AAGGTTATTCTAAAGATCAAATTTCCCTCTGTGTAGCACTTCATAATCTT  
CATAATCTTGAAGAGATTTACATATATCTACTTAATGCTTTTTTCTACTC  
TATATTAAGTAGCCATCTTCATTTATGAGAAAAGGCTTTTAGGTAACATG  
ATTTAAGCTTATCCATGCAGGTACTAGGACAATGGTTCCTTTTATACTCCC  
ATTGTTCTTATCTTCATCAATATAATCTCTTCAAAGAACGTTGTCCTCTA  
GAACTTTTATCAATGCTTTCTTATGTTTCATAGAGGAGTCGGTACACAGTC  
CTGGTAAGCAACAGAGCTCAAGGGCAACCACATGAGTTAACATGTCAAATC  
ACTCACACAAATGAACCATGCTGTAGGAAAATGATCCACATGCCACATC  
TCAAAGAGGTTTTATTTTAAAACCCATCCAGAAGAAGTAATTTTGCCTGAA  
GAGGGCAACTTCACTAGAAGACTAACTCCCTTTATTAGTTTGCTTGTTGTT  
TCCATAGCAAATTATTACAGACTGAGTGGCTTAAAGAACAGAAATTCCTT  
TTCCACAGTTCTGGAGCCTGGAAGTCTGAGACCAAGGTGTTAGAGGGTT  
GCTTTCCTCCATGGCCATCTCACTGGCTTGATAGATGGCCACCTTCTCTC  
TGTGCCCTCATATGGTCTCCCTCGGTCTGTGTTTCTGTAATCCCTTCTT  
CTTATAAGGACAGCAGCCGTATCTGATTAGCACCCACCTAATGATCTTA  
TTTAACCTTAATTATTTCTTTAAATATCCTATTGCCAAACACAGTCACAT  
GCAGACATATTGAGGGTGGAACCTTCATGATATGAATTGGGGCTGGGAGAG

GGCACATAATTCAGTGCACAACAGCCCCAAAAAAGGGGGCCTTACCCATT  
TTTATGGATCGACAACCTTAAAAATTCCTTCTTCCCCGGCAATGTGAGGAGG  
TTCTTGACTCACTCAACATGTGCTATTGAACATGAGATGATACATTGCAT  
TATAAATACAGCTCGAGTTGTGCAGATGCAAAAGACATGTGCAGCTGAAC  
AGTCATCTCAGGAAACCAAAGTGAACAGCACATGCTCCTTTCAGGATTTA  
TCAGTTTGAAAACAAGTGGAAATTATGTTTGATGAGAACTTGGAGCAAAC  
TCATTCTGTGCTGAACTGGAGCCTATTCTTGGCAATGCCCAGAGAGAAGG  
AGAAGCTGGATATATTACTGGGACGTTACCCAACAGGCATTCATGTCAA  
TTATACTCAATGGGATCGAAACCACATCTGAAGTCTCTCCACAGAGGGTA  
AACCACAGTGTGGCGGCCAGGCACAGTGACCCTGGTCACCGCGCCTTCCA  
CTTAAAAGCAGCAGCGCCTCTCAACACCTTCCTCTGCCATTTACAGTCAC  
CAAGAGGAGCATATTCACTTTCTCAGATTATCCTATTGGGTTCTCTTTTC  
CTGCCCTCACTGATATTTTTATTGGGGGAAAAAATCAGGCTTCAACAGCTT  
CCTTTCTCTCGGGCCATCCTATGTAACCTTCTATCATCTTCTAGTTTCCAA  
ACAGCAGCAGATCAAAGAAACTTTATTCTTTACCCCAAGGAACAAAACAC  
ATTTCACTCTATCTCATTAATTCTTTTTCTTTTTTTTTTTTTCTTTTCTT  
TTCTTTTCTTTTTCTTTTTCTTTTTCTTTTTTTTTCTTTCTTTCCTTCTTTT  
TCTCTCTCTCTCTCTCTCTCTCTCTCTCTCTCTCTCTCTCTCTCTCTCT  
TCTCCCTTAATTTCAAAGATAAAATGAGGGCAAAGAGAAGATCAGGCTTC  
AGGCTGTAGGCTACGCAAAAACCATTCAGCATAGTAAATAAATCAGACTG  
AATCTAATAAACCTCTTTTTGGCTACAACATAAACAAGTTTGCAAACCGAT  
GGTTGTGTCCCCACGTTTGCTGAGGAATTGCATAACACATCAGGTAGGCC  
AAAAAAGCACTAATAAATCAATCTTTACTAAACATAAAATGAGACTTGGC  
AAAGTCGAAGAAGAAAAGGAAGAAGCCGAAACGTGTGCACGAAATTTCCA  
CATTA AAAACTCATCGCTCTTGCC TGGGTCCTGATGCAATTTGAAAGGAA  
ACAGACAATTCTATAATTTTAGTAAAAATATTTATGGTACCGTATACAAG  
TTCACCAAAACATTCTCTCCCAAGTTCTTTTAAAAAATCAGCATTCCTTA  
TCCAGCAAAGGGGCTGCCTAAATAAATTTATTTTATGTACATTTTCAGAA  
CATCTGGATTCTGACTAAAAAAAACCATAAGTGCTTCCACCCTTCCCAC  
CCCCACCTCCATCAAAGAACTCTTTGGCCAGATGCCCTGTGGCCCAGCC  
TACTTCTTTATACCACACTTTAGAGGGGGAACGTATGCTTTGACATACAT  
TGTCTTAGAATTAAGGTGAGTTGGTCAACATTTCAAAGACGAGGTCAAA  
AATCAGGTTGCAGCTCTAGGAGAAGAAAAGAATTCAAACCAAAAACATTG  
GTTTTGAATTCTGGCCTTGAGAAACCTATGTAAGCTCTATGTTTTTTAAG  
TATGCAGTATTTGGGAAAAAATGCATCAATTTATATGAAGAATATAT  
AAGATAAATATATAAAGGAATTACTATTTGTACCATACTAGGTTATTGTA  
AGGGTTGAATCAAAGGGGAAAAGGCACGCAATGTTTGAATAATTTATCTG  
TTCATTCAATTTACACATTCAGGAAACCTTTTCTGAGAGTCTGTTTTGTGC  
CAGGTAGGGTTGCCATCATCAAGGAACCTCAGAATATGGTGAGGGAGCCAG  
AGGTGCCCTACAGCGGGTTGTCAATCTGTGTAAGTTCTGGAATAGATGGA  
TGCACAGTGGTGAGATGAGAAAAGTTAAGGAGGACAGATTTGGGTCAGCC  
AGGCAAACTTTAACACTATAAGAAAAGTTTTTATATTTAATCATTA AAAA  
TTGAAAAAGATTTTTATCAAACAAAGAGGACATGGAAATTAATAGGTCTC  
TTTGGGCCCTTTGCTTATAAGTCTCACATTTGCATAGCTCTCCTTGAGGAC  
ATTCCCGGTCAGTCTGCCGGAGCAAGAATATGATTATATGTTTAAGAGAG  
TGGCTGAGATGGCCCCCTGGTTATTGCAACTCCCAGGGTCTGAATCCTTGT  
GTATCGCTTTCCCTTGAAATATGGCCAAAGCTGTGACTGCATGAAC TAAC  
GGAACATGGAAAGAGTGATGAGATGTCACTTCCCTAATTACATTACAGGA  
GATAATAACCCATCTTGTTGGAAGACCCTCCCCACTGCCAGCCTTGTTGT  
CAGCTTCTCTACACAAAGGACCATATAACAAGGAAGTGATTGTAGCTTCT  
GGCCAGTAGTCTACAGGAAACCAAGGCCCCAGTCTAACAGGCCCAAGGC  
ACTCAACTGTGCCAGCAATCATATGTACATAGAAATGGATCCTTCCCCAG  
TTGAACCTTGAGATAAGACTACAGCTTTGGCCGGCACCTTGATTGCAGCT  
TCTGAGATCCTGAAGCAGAAAACCCAACTAAGCTCTGCAGGAACCTCTGA  
TCCACAGAAGTAGTGACGTAATAAATGTATGTTGTTTCAAGTTGCTACGT  
TTGTGATGATCTGCAATGCAACATAAAATAACTAATACTGTATATAATAT  
ATATAATATATTATATATTATATATATATTTTTTTTCTATATATATATAG  
GAAAGGGTGCCTGGGTGGCTCAGTTGGCTAAGCATCCAACCCTTGTTTTT

GGCTCAGGTCATGATTTAGGGTTCATGAGATCAAGCACCGTGTCTGGCTC  
TGTGCTCTGTGTGGAGTCTGCTTAAGTTCCTTTCTCCCTCTGCTCCTCCT  
ACCCATGTTATTTACCTCTCTCTCTCAAATAAATAAATCTTTAAAAGAA  
GGGGGGGGTAGCTAAAGACATAGATTCTTCCCTGTATAGAAGCAATTCAA  
CTACTAAAAATGATTTTAAGTACAACCTTTTTTCAGGAGGATGAATATACC  
ATAAGGGTAGATATGCATGTCCCTACCTTTATTGCCTTCAACTGAGGAAG  
ACTTCACTCAGATTTTTCAAAGCAAAGACATTCTGACTTCAGAGTATACA  
TATTATCCATTTTCTACCTGATTCTGGTCATCTGAAGATGGTAATATATG  
TCCTGAACTCTTACATCTCCTCTGGCATAGCACATTTCCAAAGGCAAAGC  
TCAGCTAGATATACCTGAGAAATACAGAAGAGTCTTACAGTTGAGGCAAG  
TCATGACTTTAAATTCTATGAATCTTACAGGTTCTGGACTCCCTTGTTTT  
TGAGAGATATCAAACCTTAGGTGGTTAAATAAAGGTGAAAATCTAGATCAG  
TCACTGGCATACCTGTTCTGTAAAAGGTGAGGTAGTAAATATTTTCAGTAA  
AATACTCACATGTAGGTATTTGGGTTCCTGTTGCTGCTACTCAAGTCTGC  
TAATGCAGCAGAAAAACAGCCACAATCTATGAACAAACAAACAGGACACT  
GTACTGATAAACAATGCATCTATATACAATGATACTTGAATTTACGTGA  
TTTTTACATATTAATAAATATTCTCTTTTAACTTTTAAAAATCATTTTAC  
TTTTAAGAAAGATTATTTTTTATTTATTTATTTATTTATTTATTTATTTA  
TTTATGAGAGAGCACATGTGAGTTGGGGGAGGGGCAGAGGGAGAGGGAGG  
AAGAGAATCCCCCTGCAGACTCTCCACTGAGTGTCAAGCCAGACATGCG  
GCTCCATCCCAAGGCCCTGAGATCAATGACCTAAGCCAACGTCAAGAATC  
AGCCACCAAATCGATTGAACCACCTAGGTGCCCCCTAAGAATTATTTCAA  
AAGTAAACACATTCTTTGCTCATGAGACATACAAAAACAGCAAGTGGACC  
AGAGGTGGCCTATGGGTGTAAATTTCTAAACCCTTGCTCAAAATCATGAA  
CTCCTGGTGTGTTGGGATGTGACAATCCCAGTGAATTTGTGATTAGTATT  
TTCAAAATTTAATTCACATTTATTAATAAATTTGCGTGTAAGAAATACAA  
GACGCTGTGAGATTCAAAGAGGTAAGGGAATACAGAGGGGAGGAACCAA  
GAATCCGTGGTGCCTGTAGCAGACACTTGTGGGCCCTGTGCTCTATAA  
AAGAATGGACTTACCATTTTATCTGTTGTTCCCTGAAGCTGAGGGGAATA  
TAAATTTTCATGTAAATCTGTGTCATTAGGGTCAGGTGCCAGGGTGGGG  
ACTGACTGATTTCTATTTTACTGTATTTGTTCCAGAGGTACAGAGCATT  
CTCTCCTTGTTCCTTAAGGGTTATGGTGAGGTTTGGGAATGAAGTGATA  
GACACACCTATGAGCAGACCACATGGACTAGCTGTACTCCTTGTGCCCCA  
GAATTTGGATTCTCAGCCATGTTTTCTCCCAGTATGTCCACTCTGCTGG  
CCAGTTAATCAGCTGGAGCAAGAGACAAGTACGGGCTGGCATGAGATGAA  
CAGCCTTGAAAGGGCAGTGCCACTCTAATGCTCAAAAGCTACAGCCTTTT  
AGAAATGTGAACTTGTCTAATACGCATGAAAAGATCTATTAACTTGG  
AAAAATCTCACCAGCCACTGAGTAAATACTGTCTCTATAAAGTATTGCT  
TTCATGTTTCTGTCTGAGTCTCATATCACATCTTTAGCCTCAGACTTTGT  
CTCACATAAACAAGGAAGGGGGGGGTTGGTAAAGAAGCAGAGAGCCT  
TTAATCAAGGACCTTGGGTAAAGGAACGGTCTTGTTTCTAGTCTCCTTCC  
AGCTGTAAGAATGGAGCTGCTGCCCTTCTACTATAAGAATAACCACCCCC  
CGCCCCGGCCCTAAGCAGTCTTCCCATTTTTAACTCACCTAAGGCTCAGT  
CAGTGCTTTCTCAGTGTTTCATCAATAGGTATGCTCCTCGCTTATTTGTGA  
ATAACCATCTATATTGCCTTCTACTCTGGGTACCCATCAATAAGAGGCAG  
ATCTTGAACCTCCACCCCCAAGAATAAATATTTAAATTAGTTGTCAAAC  
AGGGGTGTCTGGATGGCTCAATATGTTAGACAACCTAATCTTGATTTTCA  
CTCAGGTCATGATCTCAGGGTCTGAGATTGAGCCCCACATAGGAGCTCA  
AGTAGAAATTCTCACTCTCCCCCTCTCCCTCTATCTGCCTCTCTCCCTAC  
TCCTGCTCCCTCCCTAACTCCCTCCCTCCCTCCCTCCCTCTCTCTCTCTC  
TCTGTCTCTCTCTCAAATAAATAAATCTTTAAAAAGGCAAAATAGA  
ATAGCTGTCAAACAGACTCTGATGCCTCCTCTCAGAGCACATCATACATA  
TGCATGATCTTCCCTTATAGCAATTATGTTTAAAGTAAACAGTGGCAATG  
TTTTATTTTCCAATAGTAAGGGGAAAAAAGAAAGCAATATTAGCCAAAA  
ATGAGTCACAGTGATGGAAGAACTCTCTAGAGGCCACCACTTCATTTATT  
TGGTTATTTGCAGATTTGTGCTCTAGCCGTGTCTGAAAAGAGAATGGACA  
AATCTCAAAGAGTCCAGACTCTCACCAGAAAGTAAGCAGAATCAGGGAGC  
CACTCCCAAAGTTTATTTTAAATCCCTCCACAGTGAATGTATATTGAGA

CATTAGCAAATGACACTTAGCTTCAAATGGGAAGATCCCTTGTCTTTGCT  
GAGATGAGGGTTGCACATGGCATGCTGTCTACAGAAATTATTTTTGTCTT  
TATCCATGAGTTAAAGCCCTGGCTTAAAGCAGGATACTGGGATAAAATT  
ACAGATTCTTAAATAGACCTGGAAGGAAGCTTAAGAGAGCTTAACCAGAGG  
ATCACTCATCTTAGAAACAACAATCTAGAATGTCTGGTGAGTTGATGTA  
GTTTGTCTTAGGTGGTTAGTGGATGTGCTAATTGGATCAAAGACTAACGGA  
TTTTTTTTTTGTCTGTTTGGTTTTTGGTTTTTGATCTTATTTTCAGATTCT  
AAAAGTGGATCCATTAGGTTTCTTTAATTCTACATGACAGGCCTTTATAC  
AGAGACAAGAGACTCCCAATATTAAGACAGGATTAGTGCTGCTTCCCTT  
TTCCACTGGCCCAGGAAAAGAGGTGTGTCCCGAGTGCAGAGGAATGGGGT  
TTCTTTGCCTGGCTTCTTTAAGGCAGACAGGAATATGCTGGTAGTGGAGA  
GGGAGGGTAAACAGTGTTCTGCAAGCCCAAGGTGTCTATATACTGGTCT  
TGATTTGTCTTATTAACAGTGAAATAGGGATTCCGAGGGCAGGTCTCTTA  
AGGTGCAACATCAGTGGCAGGAAACAGGCCTGGGTCTCTGTTAGGC  
TGCTCCCGGAGAGAGAGTTAGTTGGTAAGTTTTACTGGGTGTAGTCGTA  
GCCCATACAGAGGCAAGTAGGCCATTAGATCTGGGCTGCTGACTTCTGGA  
TATGCATTTTCTCTTCAAACATAGTATTTTTCCCCAAATTAAAGTGTTT  
CATTACAATGTGTCTGCAAGGAGCTGTTTTAAACTTTTCATTCTCTAGGT  
ATAACCATTTTGAAAGGCAATTTGGTGAAACAAAGGAAATGATTCTCCAAA  
CAAGTAGGCAGTTGGAAAGGAAAAACACTGGAAATGGGAAACCCTTAACT  
TTAAATTAGCAAAGACGGGCAGTGCTGTCTATGCTACCTGTGACTCCCGA  
CTAAGGGGTTTCTCCAGAATAAGAGAGTTAAGTGCCTTCTGACCAGCTGC  
GTGTGCTAAAACTTTGATTTCACTCTTGGTCTTCATTTCATTCTCTCTT  
ATTCTACAGGACTTAAAAATTTTACAAAATCATGTATAACAAAACAGAAA  
AGCAACTTCTTTTTTTTTTCTTTTTTAAGATTTTATTTATTTATTTATG  
AGTGACACAGAGAGAGAGGCAGAGACATAGGCAGAGGGAAAGGCAGGCTC  
CCTCTGGGGAGCCCCATGCGGGACTTGATCCCAGGACTCTGGGATCACAA  
TCTGAGCCAAAGGCAGATGCTCAACCACTGAGCCACCTGGGTGCCCCAGA  
AAAGCAACATCTAGGGAGAATCAGGTGAAAAGGTCAAGTACGAAGCCAAG  
GCCAAGCACAGCATTAACCTAGGTGAAAATGGAACTAAGCTGTTTTATA  
TTCATGCTAAACACGATCATAGTTTTGGTTCACGTTTTCTAGTAGCTCTT  
GGATAATCAACACATAAGTATGCATGAGTGTATGTACTCATGTGTGAGTG  
CATTGGTGTAGGGTTTGTGGGAGTGCACATAAGTGGGTATGAATATGAGT  
GTGTTCCAAAGAAACAACCTTTCTTGCTACTGATAACTAAGTCATATGGT  
AACTGGTAGTCACTGAATGAGTTTGGAAAATATTTGAGATTCTACAATTG  
ACCTATATAGATTTCTCACTGAGAAGAAAACCTTGTCCTACTATACAAA  
CAATACATAATTTAAAATTTTAAATCCAAATAATTTAAAATTTAAAACT  
CAGATTTGTAATATGTGTTTTCCCCTTCAGATCTTGACTTTCCTTATTGA  
AATATAGCTCATTCTAGTTAAAATTAATATGAGCTTTGAAAATTAATATG  
ATTTCTTTGAGCTCATACCAGCCAGGACTGGGTGGCTATGAGAAATATGA  
CACAGACATTTCTATAAACAGTCAAGCATATCTCTTCAGTATGTAATATTT  
CATACAGATCACTCAATGGTGGTTAGGATATGGTGGATAATTTTGGCTGC  
ATGATAGCTGAGAGCATAAAGAAATCAGGATCACTATTTGTTGAGAGCC  
TCAATTTGCTCATCTCAAAAATGGAAGGGTTGGTATCTGCATTACTTTGT  
ACCTTGACATCTGAATTCCTTGTCTCTTTCTTTACTGAGAAGTTATGTGG  
GAAGTGGAATATCAATGATTGATGTTTATGGTTGTTTTCTTGTTGTTTT  
TTTTTTTTTTTTTTTTTAGGACAATAACAATAATACTAGATGTTGTCAGTGA  
GTTTTACCACATATTTTTTCATTGGACTTTATGCCTAGAATAACCTCATAA  
CCTGAAAAATAGCTATTTTCATTCTGTTGCAAATAAAGAAATAGGTTCTTT  
AACTTGACAAGGTCACTCCAGTTACTGTAAAATTTGGATTCAAGGTTAAAA  
TCAAGAACAGTAACATTTGGGAGTTTTTTAATCCCATTTTCATTTGAAACA  
ATTCTTGACCACGTGCTGTGTCAGCAGAGCTAGAACTGTGAGAAAGAGAGTT  
CTGTGTGCATGTGTCTGTGAGGCTGTGAGGGGATAATGGATTAGCTCTGG  
TACCATAGAAAGGAGCACTAAACAGCTTAAGGAAGCAGAAGATATGAGCC  
ACATCAAAATGATAGTCCAATGACACCACATTGGGCAAAAGACACAGAAAA  
TCAAAAGTCGGAAGTGAAAGTTCCATGCTGGGTAAAGATGGAAAAATAT  
GTAAGTGCTGGTGAGATCAGAGCAGGCCTTCAGATTTCTGTTTTATGCA  
CTTATCTTTTCACTTGGATAAAATTAATTTAGTTCTTTTTTTTTTTTAAAT

TTGTTTATTTATTCATGATAGTCAGACAGAGAGAGAGAGAGAGGCAGAGACA  
CAGGCAGAGGGAGAAGCAGGCTCCATGCACCCGGAGCCCGATGTGGGATC  
CGATCCCGGGTCTCCAGGATCACGCCCTGGGCCAAAGGCAGGCGCCAAAC  
CGCTGCGCCACCCAGGGATCCCTAATTTAGTTCTTTACTTCAGTCTTGCA  
AAGGGGAATGGGGCAGAGATGGAGGCCAAGGGAAAGATAATATGAGGGAC  
CCATTGAAAATGGTATCATAAGAGCAAGTTAAGATTTACGTCTGAAAATT  
ATTTGAAGTAAATAGTGATGTGGGCACAGGAAAGCACTTGAAATTTGGAA  
CTCTTGTTTTTCCCTGTGTAAGAAAGAGAGCAAGTTTGCCTAAAGCCTCA  
GTTTCATAGGCCTTGATTTCTCTGGATTTTCTGAACCTTAACAAACATGC  
AGGTATCCTAACCTGTGCTGTGTTTGCATTGATCGCGTGAACACATAGC  
AATAGATTTCCCTGAGTCTCCAGAAGTCCTAGCTGCAAGGTGGTGAAAAT  
GTTTGCTACACTGCTCCAACCTGCGGTTCTCCTGCACAATCTCTTTGGGA  
ATATTTATCTTTTATGAGTTTCAAAAAAGATTCTGGCCTTAGAGGAAAG  
ACAGATGAACAAATTAACCCCTATGGGATTATACTGGCTGCTTCTGGTCA  
TGCCACCTACTTAGACTAATCATTTCTTCTTCTATCCTCCTATATGGGG  
TGTGGTTTAATGAGGAAATCATCATTAGTTGAATATTTATTGAAAAACCC  
AGAGGTCAATGCCACTCTCCCTGTTTCCCTTATTGCTAGATTTAAAGAAA  
TTAAGATTGGAAAACCTAATTACTGGTATTGGGTACTCAGTGTGTGTGCA  
TTAAGATGCTCATCTGTGTTTGTGGCATGTTTCTACTTACTGCTTTTTG  
TATCAGTTTGAGTATATAGCATTCATTTCAAGTTACAGTTGTAATTGTTC  
AAGATTTAAGCCAGAATAGAATCTTTCAGGCTAAGCAGATCCCTGTGATC  
TACAACACTATGATGGTGAACATTAGGATTCTTAAGATTAAAATCTACTT  
ACTGACTATTCTTTTCGGGATGCTAATAACAATGAAAAGGAGACCAAAGG  
ATGATGCAAATCCCCATTTTTTTTAAAAACAACTTTTCTGGCTTTAGTTCA  
GCACCTGATGGAAATTCAGATTTATAAATCCCCTACTGAGTACATTAAT  
AATGTCTATGGGAGGTGAAAGAAACACAGAGAGAGAACATGACACAGTTG  
TCTGCCTGAGCATCTAAGGTCAGATAGTTATATTTAGGGCTTGTATTCAA  
ATGAGAACAAAGAGGTATGGCATGGGCATCAACCAATCAGGATGGACAGCA  
GTGGCTGTGAAGAAGGAAGACCAATGTTGTTCCACATCCCATTAACATGT  
GTTGCTGGATAATGGGGAGGGAGATGGGGGTAAGTTGTGGTGTGGGGAGG  
CAGTTAGGGGCCCTCGGACAGTAGCTCTGTATGAAACAATTTGGATGCATG  
TCAATGTTTTTAACAAGATATATGAGTCTTCTGGAGAAAAATACACACATAT  
TAGCCCTACCTACACTTTCTTAGAATGAGCCTTCTTTTTATAGAGCATTT  
TTCATCTAACACAAGGATCTTCAGGATATTCAATTTGACATCTTCTTAGTT  
TAATCGTCCATGCTACAGACCTCTTATAGGAACCTTCATTTATTTGAAA  
GGAGTAATTGTTTTCCAGTTTCCTTTTTTTTTCCAAAGAAGTAGGGGAGGG  
GCTAAGGAACATCTGAACCTTGGAGTGAGGCAGATTTGGGGTTTGAATCA  
AAGTTACCAGCCCTATGTCTTAGCACACTATTTAATAACTAATAGCATCT  
CTTTCCTTATCCATGACAATGGCCTCTGTGGGAATTAAATAAGATGAGTC  
TTTGGACAGTATCTAGAACAGAGAGGGTATTCCATAAATGTTTTGTGTCA  
TTCATTCCTTTTGTCTATATGACCCCTGTATCATAACCACAAGTATCTCTC  
CCTGGGTCTCATCTCCATTATTACAAAACAAGCAGAATCTCAGAGGGACG  
GTGTCTCAAGAATTTTCATCTTCATTTTTGCCACAGCACAGAGGGCCGGAC  
TGGGTACTCAGCTAATAATTGATATCCACTGAACAGTTCTCTTTGGCTTT  
TTTTCCCCCTAGGTCTTACTTTCTGTCAATTTTAGGCAGTTTTTCTCTCT  
CCTGGTTGCATTCCAGATTCTCAACATCCTTTAAATGTAACATTGGTAAA  
GTACCTTCCAGGGACACATGTGTAAAGAATAAAACTGTGCAATTGGAATC  
CATGTGAATATTTTTTAAGATTTTTTATTTCTTAGTTACTCTCTATAAATC  
TCCTTCATCTGGGATGACTGAGCCTTCATGTCCCTTTCTAATTTACACTT  
CTTATACACTTCACATGTCACCACATAAATCCCACACACCCTCACCCCAT  
CCAAAAATAACTGGACACTGAAATTACCCAAGAACTTTATAAACTCCTT  
TATTAATTCCTTGTATAGTCACATTGGGAGGCAATGCAGCATAAATAGTTA  
AAAATGCAGGCTCCAGGAATATATATGGATTCAAATCTGTTCTTCCATTT  
CCTAGATTTATGACTTTTAGCAATGTAATTAAATTAGTCCATGCCTCAGT  
TTCCCCATATGTAAATAAGGCTTACAATAGTAGGGCTACCTTATAGGGC  
CATTTTAAAGGTCATTTAGTTAATGCACATAAGGAAGTTAAAGTAGCAGC  
TGGTAAACAGTTAGTACTCAACAAAAATTAGCAATAATTATTATATATAA  
CCACTCTTCCCTGCCCTTCAGTTTAAATTCATAATGCATCAGTTATACAG

TTGTACTTGAATAGTCAGATTATCTGGGAATTTCTGACAGAAAGAAGCAT  
CCACAAGAAAGCACTAGGATATTTACTGCAGCATTATTAGCATAGTTGCA  
AAAATTAGCCACAATCTAAATGTCGGTTATGAGAAAAATAGTAAAATGAA  
TAGTAAAATAAACAGAGTATACCCACACAGTGGATTATCATAAAACCAT  
TTAAAATAACTAAATGTTTCTAAGATAAGTTATTAAGAACATGAAAGCAA  
GTTATTAAATAATATATTATGTCACATAGGTTAAGATATTA AAAATATAA  
ACCATGTACAGCACTTCTAGCTAAATATATAGAAAACAGTTTTAAAAGAT  
CCACACCAAATTAATATTTTTTGT TTTTGT TTTTCCTTATTTCTGTATTTTA  
AATATTATAATATAACTCTATTTCCCTGTATGATGAAAGATCAAATAAGA  
ATGAGCAAAGTTCAAAACAGAAAGCTGAACTGAATAGTTTGGTTTCAGGG  
GCATTGGAAGCTATTGACTTTAAAAAAAACAAAACAAAACACTGAACTCT  
GTTTCTTCCCTAGGATGGAGAGAGTAAGCCAGTTTATTGACCAATGAGTCA  
ACAGGGGCTAATAAGCTCAACTGGTTTGAATCAATGGCATCCTTTCTCAAG  
CAAGTGCATATAAAACAAGTCAATTATGTGTTTGCAGATCAATATTAGGAG  
GACTAAGATTTAATGTTGGGTTTCTTCATGTGCTTGTACAATCAAGCACC  
TGGACTTTTATGGAATAAAAGGATCCAGAATTATATCAATCATCTCTGAGA  
AATCATCTCTAGCTTCTCTGTTTCTGGAGGAGACCTTGTCCCTTTCTGTG  
GTTACAGGTTTTTGCTGTATTTTAGAATCCATTCTTTTCTTCAGTGTTC  
AGGCCTTATTTCTCAATGGGGAACTTTTCCAAATCGAAAAACAAAATAT  
CACTACGTTTTTGTAGTTTGGGAAATTGTGACATTATGACTTTTACTGATTT  
TTTTCATCGATTTTATTTTTTGAAGGAGCTGTATAAACATGCCCTGTTGT  
CGGTCACAAGCTTTCTAAAGGCCAAAAGTGTTTATGAACAAGGACTGAG  
TTTCTGCCGCACCAGCTGCATTGTCCTTCTCACACTGATAGATTGTAATC  
TATTTTGTGGACAGGAACTCTGGCCTTTGTTGTGTTGAAAATTCTCATAA  
ACTCAGACAAGGAAATGGCAGCAATAGCAATATGCAAGCATCCTCCAGTG  
AAAACACCAAGTTTCTGAGCTGAGGTCTGAGTGAAGCACC GCC  
CTGCAGGGACAGGAGCATGAAAAGAATATTGATCACACTGATCACACCTC  
ATGTCCCCTGTCCAGTCTGTGACCACTGCAGTGTTCATACTCTTCTCTAA  
CTGGGGAGCAGGCATGCTCATGGGGTTAACCATAGGATGGGGCATTCTGG  
TGCTTGGCATTAGGAATAGGGCCTGGCCACTGGTGGACTTTCAGCACATC  
ATTTCTTCCATGGGAGATGATGTGAAAGAGTGCAAACATAATGTGAAAAC  
ACAAAGAGATTCTCAAATTAAAATAACCAGCCACCAGATTGGTAAAAAAT  
TAACATCTGCCAATTCCACATATTGGGTGAAGATAGAGAACAATGGAAAC  
TTTTATGACACTGCTAAAAAGAGGGCGACATTTGTGTCACCATCTTGGA  
ATTAATTTTCATCATGAAGTTGAAAGTGTGCAAATCCTTCCTAGGTATACA  
TGAAAAATATTAAGCGTGTATACAAGAAAACATGTATCTGTATGTTTCTA  
CAATGTGGTCCCTGTACATATGTTAAAATGAAGAGAGCTACATGTGATAAC  
ATGGACAAGAAACACACACACACAAAAAACCTCAATCAAAAAAACTCACA  
CACATAGACTCAAATCCCAGCTTTACCACTTACCATGTGTATACTTTGGA  
CATAGTTTATAATCTGAGATTTAGCTGTTTATCTATAAAGCAGAATTACT  
AATAACTTCCTCAAAGTTATTGTAAAATTTTGAAAGAGTACATCTAGGAA  
GGATCTGGGGTTTTTAGAGATGTGGTCCTTTCATTTTTTCATTTGTAAAC  
AGTGACAATGGAAGTGTGGCCAAATTCAGGAAGTGTAGTCGCTGTGATAG  
TACCTTGATAAGTTAAGGCTACCATGTGTATGAAAAATCCTGAGATGATA  
TTTAACATGGGAAGTTGTGATATTATAGTCTGGTACCCACAGATCCCCG  
TATTGGATATTTAAGAGCCCACAAAAATGGAAGCAAATTGCTCTCATTGG  
AATATTGTTTGTAACTCTGATTTATTTTGT TATCACTGCATTTTTTCAA  
TGTTGCCACTTATCCATCTAAATTCATCTCAGAAGTAAGTTGACCTCATT  
ACTCAGCCTTTTATTTAATTCATCCCCTAAATCGAGCACTTACTGAAAACC  
AGGCATGTTTGCTAGAATCTGGAGAGTAAGGGAGAAACAAGATGTGCTATT  
TAACACCAACTAGTTTACAATCTAGTGTGGATGTGGAATAAGAGGAACA  
ACAACAACAAAATCATTATACAGCAAGTGCTTAAATTTCTAAACAAGAGC  
TTTGGGAAAAGGGAACATAAAGCAACTGATTTACCATTGATTATCTTAC  
CCAAC TTGGTTAACCCAAATCTAGAAGAAAAATCCTTGCCTAGAGATACA  
AGAATCCTGAATTCTCCTCTCACTCTGTCTAGCTTATCATCTATTTTTCC  
ACCATTGGCTGATCCATACTCTCTTTCTTCAGTCTTTGTAAAAGATATTA  
AAGATCTGGCTTCACAATGATGACAATAGCAGCAATCCCAGTAAGTTATT  
GAATGAATTAACTTGATTCTTGCAATCAGTTCAAAAATGTATTTATTCTT

CTAGAACAAGATCTTATCTCCATGATCTCTACTTGCATCTAGGTCAGAAT  
GACTTAGTTTTAGTTTAGTTGATTTATTGCTCCTCAAGTTTTGTATGTTTC  
TTCTTAATTCAATAATTTGCATTTTATAGTATTTGAACTTTTTATTAGAA  
GCTCATTTCCAAAAAATGCTAGTTTTTTTAGGTCCATAAGATCAGAGAGTAA  
CCTCCCTCCCCCATTCAATTCTACCCCTTCCCCAAATACCACAGCGCTATA  
CCCAGTGTTGGAACTATATGATTGGATTTGCTTCTTTTGTCAATTAGAGC  
TCACTGGGTTACAGAAAGACACTGAATGAAGTATCTTCCCCATTTATCTC  
ATTTAACAAGATATAGCAGCAGGGATAGTTCCCTGCCAATATTGATATTTA  
AAAATGAGAATTAATGAAATAGTATGTTTTTCCCTTTGAATATCTCAACA  
AGCAATACTCTGAACTAAAAAAAAAAAAAAAAAAAAAAAAACAACCCTAA  
ACAAACAAACAAAAAAAAAAAAAAAAATGAGGAAGGAAAAAAAAAGAAGGTAAG  
ACAATTGCTCCAGATGAACTCTATTGACTGTACAATATGAGATCTATGTC  
GATTTCTTAAAGTTTTCTGCTTATTAACCCTCTTTCTCTCTGCCAGCTTG  
TGGAGTTATTCCATTCCAATTTCTCACTGTTGTGTGGGAGAACAGTCGAC  
TATTGAGCATGAATCAGCAACTAAAATAAGTGTGAGGGTAACTGGGATAT  
GTCATTTGACCTTCAAATTAATTTTCTCTCATCCCTATTTCAATTTCTCTA  
TCCCTGCAACCCCTGCCTCTCTCTTCTCAGTAGACTTCTGCTAACCAAAT  
AAAAAACAGATGCACCACCCAAAACGTCCTTAACAAACCCATCCCTCTCT  
GATTTCTAGGAACACTTGTTTTGTGAAAAGCATGATAATGTATTCATTTTT  
TGTAGCAGCATAAACACAATTTGCTACATGAACACACTTTGTATTTTTCC  
CTCTCCAATTTAGGCAGCATCTCTGTCTGTCACTGTTCTTGTGAGAATGG  
TGCTTCGATTTCAAGTTAGCATAGAGATAGGAGAACATCATATAAGTTGTA  
TTTGATCTCTTTGTACTGAGTTAAAATACATACATGTTTAAATTATATAA  
ATTACAGAACTGGGCAAAGCAGGCAATACGTGTTTTGAGGTATCTCTGC  
ATCCTTTATGGTAAGTCATTTGAAATCCTTTTGTGAAATAGGCAGTGCAA  
AAATATCCCAGATCCTCTTTTGTGAAGATGCGTGCAAGGACAGAGATGCC  
ACATATGTGAAAGTTGACTTCAGAGTCTACTCACCCCTACTTGAAAGATC  
TTCCCTTGTGTTTTTCTAAGCTTTCTGTGACAATAATTTGATAAATGGAA  
GTTTGGAGCGAGGACACCAATCTGAGTGACGGCTTTGCTGCTGCTGCTCT  
GTCATTTAGGGGTGAGAGCGGCAGACAGAGCTTGGAGTGACAGATATTAT  
GTGGTGTGATGAGAGGGGCACTCATCCAAAGCGAGGAGGCACCTGTGATT  
CTAATGCTGCTTGATGTGCAGATTCAACCCTAGTCGTAATGATGCTGCAG  
GAATAGCATCAGCTAGTGATGAGGAAAAACATGGAAGGAAGGAAGGAAA  
GGAAGAAGGGAGGGAGGGAGGGAGGGAGGGAGGGAGGGAGGGAGGGAGGG  
AGAGAAGGAGTAAGGGAGGGAGGGAGGGAGGGAGGGAGGGAGGGAGGGAGG  
GAAAGAAGGAGAGAAGGAAGATATCAAATGACTCTCAGCCTAGTGAAAAG  
ATGCTCAGTACCTAGGAGATCATATCAGATTGTGTCTCTCCCCATAAC  
CTATGGGTCCCTTTGGAGACACAAATTCCTAAAGTTCGAGAGGTGAATTT  
GACATCAGGGTATGTGGATGTTTGTAAATTGACTATCTCCCTAGTGTGATG  
AATCACAAGGCAAAGACTAGTATTTATCAAATATAGGTAAGGAAAGGAAG  
TATTTCTTATAGTTTACCTTTTTTCCCTCCCTTATATAAACGAAGGCTTG  
GTGAGAGCCTCTCATACAGAGGTAGAGAAAATGAATGTGTGAGAGGAAGC  
AGAATCCAGAAGACTATTATGTTGACTTCATCCTGAAAAGAGGTTGGGGA  
TGAGTTAAAACAAACCACAGCAAAATCCCCCACTGATATGACCAGGAT  
ATTCTTTTGGGAAGTTGTAATCATTTCTCTAATTACTATATGACCCTCATA  
TTTTTGGCCAAAGCTGTGAGTTTGCCAAAGAGTTGGTCGGGGGCTGTAAT  
CCAATAAGTGTTTTATTTTCAATTGCACATTCACAAATTAAACCACAGCT  
GCAACCCAGATCAACCCCTGTGTGTTTCAGAGAGGCATAGGAAAAGTCAATT  
AGTTTTTCCACTCTCTAGGGCCAAATGGACAATTAGACTAGGGAAAATGG  
GGGTGGGGTGTGTGTGTGTGTATGCCTGTGCATGTGTGTGTATGAC  
TATTTCTGTGGACAAAATAAGACTGAAGACTGAAATATCAAGTTCATGTGA  
ATCAGTCCAACCAAAGCACGTTGCTTTCTACAAAGACATTTTTACTGTAT  
TAGGTTATAAAATTCCAGAGGGTAAGATTTATAGAATGATCATCATACAC  
TCATCAGTGTCTTGCAAAACATTTATTGTATAGAAGTTTCTTAAATATTT  
GTTGAACAAATGTCTGAATGATTGACTGATCCTCTGTGAAAACATGCATT  
CAGGTAATCATATTCATTTTTATCACTTGCTCCTTTCCCAGTCCGCATGTA  
TAGTTGTGAGATCACACTGTCTATATTTGGAATAATAGAGAGCTGTCAA  
TGTAGCAGATGTCTGGGTTAGCAATCCAATTGCCTCACTCTTTTGTGAAT

GCTGCCATCAAACAGTGGGTGAGTTCAAAATTAGATGAATCATCACCTCT  
CTTGTCACCTTGGTTTGCCACCTGCTGACAGGGAGCGATTACCCCTTAAT  
GGGAATCATCCCTAGTGAAGATAACACACCTCCATTTCAATTAGAAGCATT  
GTTAGATTGACCTGGGGTAGGGTGTGAGGGTGTTTAGTGTTTATTATATC  
ATTATTTGCCCCAAACAAAGATAACCTGTGTTTGGAAATGATGTGTGGAA  
ATGGCAGTTTCTAGCTGTAGGCTTTGAAATATTTTTGTCAGTGAATATCGTA  
GCAACCACAAAATTGCCATGGACTTTTTGTTAATGGAGGATCATCTCCCT  
ACCTTTTGCAAACTTTTAAGAAGAAATCATTAATCATAAAATAAAGTCC  
TAATACAGCATGCCATTTGGGACTTTCTGTAATTGCTTGGCCTACAATCT  
CAAGAACTCTCTAATTCAGCCACAATGGGCATGTTACATTTTTTTGTGC  
CTGTGACCTCCGTTTCCTAGGTAAATGACACTCTCTCTCCACCTGTGTTT  
AACTTTTCTACTAATTCATCAACCCTTAGCTTGGATCATCAGATTCTTAA  
GTATTTCTCTAGTCTCCCTGACCATTATTAAATTCTCCCTCTCCTGAGTT  
GCTATACGTTATTTTGAAATTTCAATTTCTTGTTTATTACCCTTCAGTAA  
TTGTCCATTACTTATTGTAGAAAGGAGTAAGTGACAGATTTGCCTTTTGT  
CATGGCTGATGGTGCAAGTTTTACCTTTGAGAACAAAAGATTGTGCATTTT  
GGTTTTTCTCCTACTCAGTGCTTTGCACCACCCCTTTGACAAAGTAAGAA  
TGCAGTAACTATTAGTTGAATTGAATTGTACTGAACTGGCCTTATGAAGC  
TTTTAGTCTAATTGGGTAAAAAGACAAGCAGATTAAGCACCATAAAGAGA  
ATGGCAAAGCATCAGAATTAAGACTGCATAGCAATATGGGATAAAATGAA  
TATGGTAATCAGGGAAGTACACTATAAAAATTATTTTAGCTGAGTAAGAG  
GCAATCGGAAAAGATTTAGACATACCTCTTGCTGCTAAATCTTAGAGGATA  
TTGTTATTTTTTACTCTAGTGACTAACACATTCAACAATTCATTTAAAAA  
ATGAAATATTTGAAATTCAGAAAGATAAAATGAAGGAGACAATGACATAT  
ACATTTTATAGAAACATAAAATGGCATAAAGTTTCTGAAAAGTAGTTGGG  
TTTTATTAGGAAAATTTTGGAAAGTCCATAGTTTGTCTCCAATTATTTCA  
CTTCAAGCGATCTATTCTAAATGCATAATTGAATATTAGAGCGAAGGTTT  
ATATACAATGATATTAATCACTCTCCTTTTATCTATTACATGGGTCAGCC  
TTTAATTAATCACATTCAGGGTACTCTGGGCTGCCTCAGGACCTTCCCTT  
CAGCAAAAGTATTCTATCTCAACCCTTTTCTCCCCCAGCTAAATCCTAT  
ATATCTTCACTTCTTACTAAGCTTAAATATCCCTTTGCAGGACTACCTTC  
CTTCTATTCACATGGAAGAAGGGAAGAAGAGAAGTTAGGTTTACTCCACA  
ACCCACTCCCCCTCTACTATGTTTATATATCCCTCATATTGTCCTTATTC  
TCCTCCAAACATGTACAGACAAATATTGAGACTCTGTCTTTTCCATATAT  
TCTAAATTCATGAATATAGGACCAGGTGTATCTTTCTTATTGCTATATC  
TAAGTGCCAAGCACAGTGCTGCCAGAGCAGGCATGCTCGGCTAGTATTTG  
TTGAAAAACATACAAATAATCTCAATAACAAAAGATTAAAAAGAATCTA  
GAAATCTAAAAGGTGGGTACTTGTTTATGGACGATGATATAGTCATAAGG  
TGGCATATGATAACCATTAAAAACAATGTTGACATTTGATAACCTCACATA  
ATAACAATGCGTACAATTGTAAATGAAAACAGAAAGATGTAAGATAACAA  
AAACATGATGATCATCACTCTGTGGAAGGTGTAGAAGTGTTCATGAAG  
TGATGCATCACCAGACTGTTGACACTGATTATTGCAGCCTGGAGGGGTTG  
TGGGTGCATCTCTTCATTCAAAGTACAGGCTTGGGCTCTGGGTGTCAGCA  
ATAAATAAGACAAATGAGATCTTTGATCTCATGAACTGTACTTGTTTCATG  
GTCCAGGAAAGTGATCAAGAAGTGAATAATTAAATATACAGAAAAGCAAT  
TCCCAGTTAGAATAATTTGGGGGACCATGCAAATAAGATAAAATGATGG  
AATACATCATTGTGAGGGCTCCTCTTGGGCTTCTTCTAGGGAGCAATGAC  
CTACCCGAGACCTGAGAGTGAGGACCAGCCAAGCTTGGGCACAGTGTCT  
CTGAGAGAGCTTGTTGTGTCTTCCATTTCCCTTCTTGCTTTTACTGTAT  
CTTAATTTTTTCTATAATAAGCATGAAATTGTCTTATGGTTAGAAAAAAT  
AATCAATAAAAAGGCATATACCTAGTCACAAAATTTGCATAACATAGTGT  
GAGCCACATAAAAAAATGCCAGTTAATTTTCATTATTAAAGGAAGAAA  
GGAAGGAAAGGAAGAAGAAGGAAAGAAGGAAGGGTCATGCATCAGTTTCA  
CCGAGTCAGCTCCCTAGTAGGGACATAACCTCAAGATCTTCCACATTGT  
GAATACCCATTAACCTGGACCCCATATGTATTGAGGATGTCAGCTGGAAT  
CTACACTGGGATTCCAATGTGGGAGACTAAATAATACAGTACATGTAAAT  
TCCTAAAATAGTGCTTGGTACCTAGAAGGTAGGGTGACTTATTTGCCTCA  
ATTTGCCTACAACCTGGTCCCAGTTTTTTAAATAGTCCCTGACAAACCAAG

GGGGTTGGTACTCTGTTAGCAGGTACTTTTAATGATAAAGCAATGAGTGG  
GACTACCAAACATTTCTTGAATGAGTGTATCTGGAGAAGAAAGGAG  
GTTTTTGTCTGGCAGCTAAGAGAGAAGCAGGGCTGGTAGCCACCATCC  
ATGTACGTCTCTTAGACATTAGTTCCTACGCTGAGTTATGTCAGACCCC  
CACATAAAGGGGCTGTGGACAGAAGCTGAATGGGTGATTTTCACAAAAGC  
CTCATGAGGTAAGCAAGGCTTTGGCGACTGATGGGGTTGGGAAGGGAAAA  
ATATTCCCAACTTCTATAGGGAATACTGCACAACGTTGGTGAAGAGAAAA  
CACACGATAAGTTAGGGGTACATCAACTGAATATTTAGTTTTGCTTCTTT  
TGAAGCTGCCCAAATATTTGAAATTTAGGACACATGTATTTTCACCTTAG  
TG TAGTTTTAGTGATTTGTTTGTTCATTTATTTTAAGCAGATGATA  
TATTACAGCAATATTAATGAAATTGAAGAAAATTAAAAATACACAGTCAC  
AGGATTCTAACATAATAGATTTTATATATCGTCCTTCTAATATTTTTAGT  
ATGCATTTTAAATAGTCCTAAATATAAGATGCATGCAAGTTAGCTATATG  
TATTATGTATACAATCCTTATCTTTCTTTTAAAATATTTAATTTATTTAT  
TTGAGAGAGCACAAAGCAACAGGGGAGACACAGAGGGAGAGGGAGAAGCAG  
ACTCCCCACCGAGCAGGATCCCCGTGTGTAGGGATCCCTACGCAGCCTTGA  
TTCCACGGTCTGGGATCATGATGTGAAGGTGGACACTTAACTGA  
CTGAGCCACCCCGGTGCCCAATCCTTATCTTTATTTTATTTATTTTTT  
TAAGAATTTTATTTATTTGTTTCATGACAGACACAGAGAGAGAGGAAGA  
GACGCAGGCAGAGGGAGAAGCAGGCTCCCTGGGGTGGGGGAGCCCAACGT  
GGGACTCAATCCCAGGACCTGGGATCATGCCCTGAGCTAAAGGGAGACA  
CTTAACCACTGAGCCACCCAGATGTCCCTCAATCTTCATCTTTTAAAAGC  
AATTTTAGGTTTATAGCAATATTGAGCAAAAGGTACAAAGATTTCCAATA  
AACCCCTACTCCCACATGTGCATAAACTCCCATATTATCAACATTCCTC  
ACCAGAGTGGTATATATGTTACAATTGTTCAATCTACACTGATACCCAT  
GAACACCCAGTGTCCATAGTTTACATTAGGATTACTCTTGGTGTTCATT  
TTCTGTGGGTTTGGACAAATGTGTAACGTACATTTCATCATATAATCAATC  
ATATTGAATAGTTTCATTGTCTGAAAATTGTCTGTGCTGCACCTCTTGA  
TCCCTGCCCCCTTCACCTGATATTTTACCATCTCCAAGGATTGGTTTTTT  
CTAGACTGTTATATAGTTGGAATCACACAGTACATACTTTTCCCAGATTG  
GCTTCTTTCATTTAGTAATATGTATTTAGGATTCTCCCTTTCTGAGTCT  
TTTCATGGCTTGACAGATTACTTTTTTTAGTACTAAATAATATTCCATTA  
CAGGATACATAGTCTGGATGTACCACAGTTTGTATTATCCGTTACCTACT  
GAAGAACTTCTAGATTGTTTCCAAGTTTCGGCAATTACGAACAAAGCTGT  
TACCAGCATCCATTGGCAAGTTTTTGGGTGGACATAAAATTTTTGACATCT  
TTGGGTAAATACCAAGGAGTGCAATTGCCAGATTGCATGGTAAAGTACAT  
TTAGTTTTTGTGTTTGTGTTTATCTTTTTCAGAACTGCCACACTGTATT  
TCAAAGTAATTGTACCATTTTGACGCTCACCAGTAGTGAATGAGAGTTC  
CTCTTGATCCACATCCTCACCAGCATTTGATGTTGTCAGTGTTTTAGATT  
TTGGTCATTATTACAGTTATGTAGTGGTATCTCAGTGTTTAAATTTGAAT  
TTCTTGTTGACATAGGATGTGGAGCATCATTTTCATACACTTATTTGCCAT  
CTTATGTCTACCCTGGTGAGGTTTCTTGAGATCTTTAGCCAGTTTTATTT  
GGGTGTTTTCTTATTGTTGATTTTTTAAAATTCTTCGTGTATTTTGGTAA  
CAGATCTTAATCAGGTATGTCTTTAGCCAGTATTTTCCCTCACTCTGTGG  
TTGGTCTTTTCAATTCCTTGACAATGTTTTTTTTTTTTTGCAGAGCAGAA  
GATTGCAATTTTCATAGAATCCCACTCTTAATTCTTTTTTTCATGGATTGT  
GTTTTTTGGTGTTGTATCAAAAAGATATTGCCAAACCCAAGAACATCTAG  
ATTTTTTTTCCCTATATCATATTCTAAGTGTTTCATAGTTTGAATTTTAG  
ATCTGTGACCTAAATGTAGGTCCATGACCCATTTGGAGTTAACTGTTTAT  
GGAGAGTATACAGTTTAGGTATAGATTTATTTTTTTGCATGTGGATGTTT  
AGTTGTTCCAGCTTTCATATTTTTTAAATATATCATGCATATTATTT  
CTGGTTCTCACATAACCTTTACTACCATTATTTTTTAATTTAATTTATTTT  
ATTTAATTTTTTAAAAGATTTTATTTATTTATTCATGAAAGACACAGAG  
AAAGGCAGAGACACAGGCAGAGGGAGAAGTAGGCTCCGTGCAAGGAGCCC  
GATGTGGGACTCAATCCTGGGTCCCGGATCACACCGTGAGCTGATGGCA  
AATGCTCAACCACTGAGCCACCCAGGTGTCCCTATTACCATTATTTTTTAA  
AGGCTACGTAACATTTTCATCATCAGTACTGTACTAGGGGACACTTTTATT  
TCTTATCAAAAGTAACAACATTTTTTGCACATAAGGCATTTGTATTTCAGA

CCATTTTCTTAAGGCATATTTATAGAACTGCAATTATCTGGTCAAAAGGA  
AGAGCACCCCTAATGTCTTTGATCTATTTTGCTACTTACTTGCCAATGCCC  
GTTGGTAATTTCAAGCACCAACAGTAGGTTATGACACTTAAAGACAAAAC  
AGAACAAAAAAGTCTGATGTTTGATTCTGCTTGATTCTACTGAACATT  
TTTATCATATTTATTTACTAGTTGTAGGTCTTCTTTTGTAATTTCTTTT  
CAAATTTTTGCCCATCTATCTTTCAGTGAATTGTTTTCCCTAACAAATAT  
TCTATTTTTAATAAGGTTTTTTAGCTCTTTTCTCATCCTATTTTGTA  
ACAGTTTCTACTCTGCCCTTCACCTTTACATTTTGTTATAATTTAACCT  
GCATAAAGTTTACATTTTACATTACAACCTATTGAAATATATTTTCTT  
TTTTTTATTTCTTCACTTATCCATTTAGAAACCTATTTACCTTCTATGTC  
TTTAAAAAATATTCAATTCTCTTCTATCTAGTTTTTATTGTAAATATA  
TAATTTACTTTTTTACATAGATTTGATTTTAAGTTGTTCTGTGGAGAGAT  
AAGAGACATTAACTTTTTTCTTTTCCAGTCTGTTATCCTTTGTTCTACTA  
CATACTTTACTGTGAACCTCAATGATATTTTAAAATACCATAATTGGAGTT  
CACATTTACACCTTATTTACTACTGTTGAACCTATGTTTTAAGCTAAATTA  
ATAAAGCAATGGTTATCTTGATAAAACAAGCAATTTTATAAATGTAATTT  
GAATATTTTTGTATACATTGGATTACATACATAACAAATTTTGGAAGAA  
ATATCTGTCCCAATTTGATAGAGAATGGCAAATAATTGTTTTGAGATTT  
TAGGTTGCTTTATGTTATTTCTCCCATCCTTATTGTATTTGATGACTCC  
CTGATTCAAAGCAGATGTGAATTTTAATATATTTTGCAAACCTCTCAGTA  
AATAAATGAACAAAAAGCATATAATGTTCCATGCCCAGGGTGGGAGGGAG  
TGTAATTAATGACAAGACATAAGGCTCTGCTCATATGAATAGTATAGAAG  
AAATATATAAATTTTTCTTTAAAAATGGATCAAGGGACCATAATATAAAT  
GAATAAGATTATAGGGGCTAGAAAAGAGCCTGAGGGTACATCTAGTTCAAC  
TGGCTCATTGAATTGTAATAAAAAATAATAGAAGTGAATATTAATTTGACT  
TTATAACACAGAGACTGTACTAAGTGCATTATCTCATTTATTTATCAGAA  
TCCTCTGTGTACTCCCAGCTTACAAATGAGGAAATTTACATGTGACGCCA  
TTGCTTCAGCATGATCATGAAGAACTTCCAACAAAGAGAAGTGACTTTT  
CAAAAATCACAGAATTGAGTCAAGACTATCAAACCTCCCTGAGATATGCCA  
GTTCTTGGTACAATTTTTATTTGATGTGGCTTGTGCAAGACAGTACACAA  
ACACACACACCCACACACACACATTTTCTAATAATGTCATTTATTTTTTT  
GCAATAGAATGTTTTCTGAGTCTCACTTTACTCTAAGTACACAACATACA  
ACAGTACATTATTAATGCATTTATATTCTTTTAAAGATTCCATATTGTAA  
AGTTATTTGTAAGTGTCAATCATGACAGGGAGAAGTAAAATGAGTAAT  
CATAATTAGTTGTTATGCTCATGCTTTCTTGCCACATCTGCTCAATGTAA  
TTAGATTGTGCTCCTTGTGCTCCACTTTTCTGTGATGGGCTCAAATTCTG  
GCTTCATGTGGTGTCTACATCCTGTAGTTATCATTGACATTTTCTCCA  
TTAGCATAGCTCCCTGAGGGAGTCCCCTATGCCGGGCATATCATTCTATA  
AATTCTACTTTGTTAGTGCTGTCAAGGAATGCATCACTACCGCCTTTGTT  
CCTCACCAAAATACCATGAATCGCTGTATCCCACATATGATTTAAGTGGA  
GAGAAGATCTGGAGTAAAGAACTTGTGGTTCATCTTTGTCTCTCCTGC  
AAATAAGTGGATCACTTTTGGGCAAGTTACTTAATCTTTGTAATTCTCAT  
TTTACCTGTCTGTAAAATGGGGGTGTGGATTACAGAGTCTTAGGGGTTT  
TCTAAGAGATTTACATTTACAGCATGTAATTGTTTCTCAAGAAATATTGT  
TTGTTTTCCAAAGGCAGGTCTCTTTTCATAGACATTGGGCAGCTCTTAAG  
ATCTTGCTTGCTTCCCTATCATGGCTGAGTTTTTAATTCAAGAACTTCCT  
TTACCCTAATTCCCTCCTTGCCATATTAATATAGCATTATTAGGTCTTAATT  
GCTTTGGGAAAGCTAACAGTAAGTACTAAGCTTTCACATAACACAATTTA  
AGTTTGCATATTAGTCTAGAGAAAGACAGCTATAACTTTCCATTCTTCTC  
TGCTGATTTTTCCCCCTAATACATTATTTGTTGAAGATGGAATTTCATAGT  
AGGAAGTGAAGGGGAAGGAAAAGAAGTATTTAGCTTATGACAGTCACAG  
AGCCATCTCCGAAGACCTTGGTTTTACGCGTGTTAGGTGCCAACTTTGG  
TCTTCATTCTGAACCTTTCTTACACATTTACAATGGCGAAATATGATGGAA  
AAGACTCTGGGCTCATCATTCAGAGAAACCATCTGTGCCAGAGTAACTGT  
CTGTGGAGAGGGAAAAAATAAATCATTTTCAAAAATCCCATTGCTCCAAA  
ATCTGGTCCAATGCCACCGTCTTGAGTGCCAAGTATTCCATCTGGCAAAA  
GCAAGTCATGAAAAGCACAAAGGCAATTTACCCAATTGGCCTGGGCACA  
AAGTTTATTCTTCAATTATTTTTTGCAAGTCTTCCCTCGGAGTGTGGTTC

AGACAGTTCTGCACTAGGATCCACGGTCGGGCAGGGTTCAAGTAGGCAAA  
AACACAACCCAGTGGGAGTACGAGTAGAATTTGCAATAAGTTAGTCTCAC  
AATTTTATTGCTCCTGTTTAAAAATCCTTCCTTCCTAACAGGTTAACCT  
ATTTAGGGGTTTTCAAAGAGGAGCTTCCTGATAGTATCATAGAACCAGAT  
ACAGAGTAAGTTGATATTCAACTTACTATTGTGAAGTATCAAGACCTTT  
GACAATTTATAATCTGACAGCCTCACTTCTTAAATGGGCTGCTGTGGTAA  
TGCAATTAATTGGTAACCTTCCTTATCTCTATCATCTTCTATTATTTTTAG  
GTAAAGGCTTCATTTTTAAACGAGTCAACTTTCCCTTCGGTATCCTTGGA  
AACCAACCAATCCAATGGTTTTGCTGCGTTGGTGAGACAATCTATTTCTT  
GGGAGATTGCCATTTAGAGGATTAAAATGATAAGGCCCCAAAGAAGGAAT  
TTTTCTGACAGCAAATCAATTCATGTACCTTTCAGAGAGTTTTCTAGAAA  
TTTGCTTCAGAACAGTTGAATAAAGGTAATGTCATTTTCAGGACTAGAGAG  
CTTCTAACCAGCATACTTTTCAGAGCTATCACCAGCTGGTTATTTGCACTC  
TGTGGAATGCATGTTCTGTACTCTAGAGACATGAATCACTTGTTCAATTA  
AAAAATAGTATTTCCCTAGGAATTATTTGATCAAGAATGGGAATAAGTTGT  
GGGTGAAATTGTGGCCATTTACATTTCTCTCTTGGAAACAGGCCTGCAGT  
TTCATGACAGTATATACACATATTGATCAACTTCTCCCTCTGAAACATCA  
GCTGTAGAATTAATGACTGTGGATTTTTCTAGGATTTCTTAAAACTAGG  
TCAAGCCTTTCCAATGTGGGAGTTAAATGCATGCTTTTCATTGTAGAATT  
TTGGGAAAAATTGGATGCCAAGAGAAAAAGTGTATTAAGCACCTGGTCACA  
AGCAATTCTTTACCAAATTGTATCTGAGTTTTGTTTACTCAAATGAATG  
TAATCACTCTGTAGGATTATAGTGTGGAAATTATCTGATCAATGACAACT  
TCCAATGTCGCAATCCAGCTTGAGGAATCATTTTATCTACATTATCAGAC  
ATATTCATCCTGTCAATTACTGCATTAATTTTTCAAATCTTTACTAGATA  
TCTCCAATGTGTGCTGCTTACTCCATAAAAACTGGGGATACCCAGTGTGAT  
ATAAACTTTTAAATGTTCAACATTTTAAAGATGCATATAAATTAATACT  
TATAAAACAAAGAATATAAAATTGCAAAGGAAATGGAGAATAGATTAGCT  
AATTTTCCTGTTTAGATTTGATTTTCAGCCCCTACATCTGAATCATGAAGG  
GCATCTGGGTGGCTAAGGGATTGAGTGTCTGACCTTGGCTCAAGACATGA  
TCCAGGGTTCCTGGGATTGAGTTCACATCAGGCTCTCCACAGGGAGCCT  
ACTTTTCCTTCTGCCAATTTCTCTGCCTCTGTCTCTGTGTCTCTCATGAA  
TAAATAAATAAAATCTTAAAAAAAAAAGATTTGAATCATGAAAAATTAAA  
AACAAAGAAAAAGAAATGAAGGTAATGCTAAACAAAGATAGGAGTATGCA  
AAAGTTACTGACTTGCGAAAGCTTGGAAATATGGTGGGAAATATGTATATG  
GTGCAACATAACTGAGTGTGGGGATAAATGGCTGTAAAGGAAGTTAAAGG  
GGACTTTCTGTGTTAAGCAAAAGTGTCTGATTTAATTGTCTAGGTTGTA  
AAAACCTTATGGAAGGATTTTAAAGCAGAAAAGTGCTAGGATCCCGTTTGCA  
TTTTAGAAGAATAAGGTACAAGAAAGAGCTTTTAGAGGGAAGGCAGTGGA  
AGCAGAATAATTTAGACAATAGGAGCCCCCAGAGAATGAGGATGGGACCT  
GAAATTAAAATTTGGGCAGATGGAACCTAGAGAAATGATGATGAGGATGT  
GTGTCATTGCTGATGTCAATTAACAGAAGGTAGAGAATAGAAGAGTCAAAA  
TAGTCTTTTGCTTTTTGTCTACTCTTTGCATCCTGGCTTACTTCCACCAC  
ATAGTTATTTCCCTATTAATATTCATTTATTTATTTAGATGGAGGTGTTT  
TAGCATGAAGCCAGGTGGAAGAGGGGAAATGATGTACAGTTTGGGCAGA  
AAAGGGCTGCATTATCCTTGTGGATAGCCATAGTATTCCTAACATCCCAT  
GTCTGGGCAGTGAGTATTTTAAAATCAGAATGTTGGATTTTACATTTGGT  
TTCTTGAATGTCACCATTCAGTCTGATGAGATTATTTGGGATTTTGATT  
CTGTTGTGTCTAATGTCCGCTGTATCTTCCAACCTTCATGTCACAAAAAAG  
TGAAGGGCAGTATTTGTGCATAAAGATTTTCTCCAAGTCACAATACAGCT  
TTTACTGGATGATGCCAGGAAGACTGTGCTGTTGAACAAAACATAATTACT  
TCACTCCACAGAGACACCAAGAACTAATCACTTCTTTCAGTGGAGTTAT  
TCAGAAGTCGTAAATCTACAGCAAAGTGTGTGATTTAGACCAAGGCTAT  
AAAGGGAGATTATATTGAGTGTGTTTTGCTTAAATCAATAGCTTGTAGTT  
TCAGATTATATCTATAAAAAATCCAGGACTGGTAGCTGTAAAAGTACCTCA  
CATACCTATTGACTGCTTATAGCTTAAACGTCCTTATGTAAAGTCAGGATG  
ATATTTCTGCTTTCAATATTTATCTTTATATGGTATATTAACATCAGGGA  
AATCAGGTTTATTGTATTATTTCAAAAATGGTTAGGAATAAAGAGATACT  
TATATTGTAAGGTTGATCCAATGATCATCTAGTCATGCTACATTTTATTA

ATTA ACTAAAATTAGCTGCAATCAACTGAATGCTTACCACTTTAGTTATT  
AATCATTTTAAATTGGTGATTTTCAGGTAATTTTCATAATAATGGCAAGATT  
TTAGCACTGTAAGCAGTCCGATCACATGGAGAAGGAACTTACACTTAGG  
ATATGGTAATTCCTCAAGACTTTTAGGTAAGTACAGTATATATTTGAACCG  
AGAGCTGTCGATCTATAGAACCGGAACACTTCACTGAATAGTGTGATGAC  
AACTGTTAATAATTCCATAGGAATAACAAATACATTTATTTTTCAGAGTT  
TCTGAACATAAGAACTTGAAAACCTCAAAGCCTAAAGTCTGACAAACACA  
AAATGAATTCACATACAAGCAGAGAGTGAGATAAAACTAGCTCTTTTATT  
GTGGATTTTAAAACCACAATGGGAAAATACTGGGGGCAATGAAGTTCTGC  
CATAGAAAATTTCCGACTGAGAAAAGAAGGCATTGGATTTTCTGTAGGCA  
AATGTGTTTCCAGTTGTTGACAATGTCTGAGGAAGTTAGCTCAACTGGAC  
ACTTTTGAGACTTTTGTTCTTTACCTGGTGTAATTCGATTCAACATCTAT  
CTCAGCAGGGATTTGAACCTGCAGTACTTAACTGATTAATGCTCCTGCTC  
CTAAATATATCATAAAGTCTTTGTTCTTACAGACTGAGTTTGTAGAATTT  
TCTCAGGTTATACACTTCGCCTGTTACTCAAGAGGGGATTGGTGTGGATG  
GTATGATAGCTTTGTGGCTACTCATGAGTCAAGTGTTCAGAAGTTGTCTT  
CAGTATTTTATTTGAAGCTGTATCTTATAGCACAGGCCTATAAATACATT  
CATATTGTAGTGAAAAACCAAGTTTGTCCAAAACCAAACTTAGAGAA  
ATCTCATGCATGTACCTTTTCAATAACTTACTCCTTTTCATCTCTCCTTT  
AGAGCAAACAGCCAAAACCTTACTGGTGTTTCATGTTTCAGTGTCTGTGAAA  
TTGCAACACGTATAAAGAAGACAACAGATCAATACCTACTTTCCCCAGGG  
CATATTTACTTTAGTTTAAAAAAATACCCTAGGGTGTTTACTATTTCTA  
GTTTTTTCTTGTAAGGGGAGAACTTAAAAGAAACAAATCTGAACCACTGT  
GGACCAAAGAGGAAATAGTGTTGAGAAATTGCAGACTTTTGAGGCATTAG  
GCAATGAGCTGTCCGGAATAAATAAATAATTTCAAGGAAAAA  
AAAGTCCTTGGAATTGAGATGTATTAGACAATGCATCAAAGGGGATAAA  
AGGAAAAGAAAGTCAGGTAGTTTACAATAAGATCTAGGAAGATAAAGTCC  
CGAATGTCCCACTTCTCATGATTAAGAAATAAGGAGACAACATGAGGTGT  
CCTGCATTCAAGATACTTCATGAGGACAAACAGAAAAGTGTAGAAAACAA  
AACAACACACCTCAGTCCCAAGGCCTTATTTCCATCTGCTCACATTGCTC  
CCACCTGCTCTAGTTTATCAAAGTCACTCAAGTGTCATGTGAAGGGCACC  
CTTGTTGCTTTGGCTTGGCCAGCACAGAGCCATGTGACATGTTGGAGTGG  
TTTCAGTCGTTCTTAGCTTCCCAGTGCATTTTGGAGTTACATTCATAAC  
ATTTAAGACAGACTCTCTCCATCAGAGTTTTCTCATAGATTTATGCCT  
TTGTTCCTTTCTTTTAAAGCAGGAGTGACTTTAGCAGTTCTTCAGATCT  
GAGTTTTTCACACACGCAGAATTTGCTTTGGTAAAGACAGCCTGGCAAGT  
CAGGAAGGAGACCACTCGACACCTAAAGAATGTCACACACAGTTATCTTC  
CTACTGGTAGGTATCATGTCTCTGAGGATCACAGAAATGAGGATAATCTG  
ACCATCACATTCAAAAAGAGGACAGAGTTTGTTCCTCAGAGAGGGTAGGG  
AATAAATAGAAAGTTATGACCAAGAATCAGAAGATCGGGCTTCATTACAA  
GCTTTATCTCAAATTGGGTGACCTGGATCAACTACCTTACGTCTCTGGGT  
TTTAAGTTTCTCATCCTTCCCCCCCCACCCCTAAAAAAGGACATCAGTAT  
TTTTCACTAGCCCAATTCAATTCCCATCAGACTCATATATTATTGTAGG  
TATAGACCACACAGATGTCACAAATATAGAGCTACATAAACATCAGGGAT  
CAAGTTCTCTCCCAAGATTTTAGATTTAATTGGATATTAGGTGAAGTCCA  
GACATTAGAGATATTTGGATTTATTTAAAAGCTATCCAAGTGGGGCACCCG  
GGTGGCTCAGTTGGTTAAGCATCTGCCTTCAGCTCAGGTCATGACCCGAG  
GGTCTGGGATGGAGCCCCACATTTGTGTTCCCTGCCCAGTGAGGTGTTTG  
CTTCTCCCTCTCCCTCTGCTCCTCACTCTGCTTGCTGCTCTCATTCTCTCT  
CTCTCTCAAATAAATAAATAATTTAAAAAAGAAAAGCTATCCAAGTGACA  
CTAATAAGGAACCATGGTTGAGAGCCACTAGTATGGATAACATCTAAGTA  
ACCCCATTTCTCTAGGTACAGAAACTATTTAAAATAATTTTAGGGAATT  
TTTACGTACATGGCAATGAGGCAGAGGGAGGAGGAGAAGGAAGGGAGATG  
AGAAGAAAGAAGGGGGGTGGGAGGAGGAGAACTGTAAATCATTATTCTTG  
ACCTTCATATTCTCATAATCTGTTAGGGAATACCCAACAATACCCACTAC  
TGCTATAGCACAGGTTATGTTAAATCAAATGACCAAATCCTTGAAAAAA  
ATAGAAGTGAAATTAGCCATGCATAAGAGTTTTTTATAAAGGTAGAAATCA  
ACAGGAATTACAATTAGGGCATGAAAGAGACATGTAGGTGGGCCTTGGAG

GACAGGTAATATGTGTTTTAGCAGGTGTGAAAGAAGGCACTGTAAATACAC  
TGGACTCTCTCTGTCCCAGATACACCATGGAGAGTCATGCCCCAAGCCT  
TTGCTCACAACATTTCTTTATCATCTACTCTTAGATGTCATTTCCCTATTT  
GTATATTTCCCTACCTCTAAAAAGATATGATTACTCCTTGTTTTTTTGCT  
CAAGGATTTATTAGTTGACATTTTTTAAAAATCACCTACTACATTTTCATT  
ATAGTTATTTGTTTTCAAATCTGCCTCTTTCTTTAGAGACTTTTAAAGTGC  
TCTAAGTTTCTCTTTTATTGTCAATGTCTAACACAGTATTTTAGAGAAAAG  
TGTTCTTGAGTTAAATAAGTATGGATAGAAGAACAAGAGTAAAGATTTTT  
ACTTGGGGGATCCCTGGGTGGCTCAGTGGTTTAGCGCCTGCCTTTGGCCC  
AGGGCGCGATCCTGGAGTCCCGGGATCGAGTCCACGTTGGGATCCTTGC  
ATGGAGCCTGCTCCCTCTGCCTGTGTCTCTGCCTCTCTCTCTCTATGT  
CTATCACAAATAAATAAATAAATAAATAAATAAATAAATAAATAAATAACA  
TCCTTTTAAAAAAGATTTTTTACTTGACAATGGTTAGGAAATAAATATGG  
ACACACAGTGAGGACAGAATATAAAATTTTTGGGTCTGAGTAGTGTTCAT  
ATTTGGAGACACACAATGAGGGGAATAATTTGAAACCTTTGCAGTTGGA  
GTTCTCTGAGCAGGAAAATGACAGAGTTGGAGGCTTGATTGGAAAGGGAA  
AAAAATAAAGGTGAGAAATGTTCAAGAAGGATCAATAGGAATTGGTGATT  
GATTAGAAATGGGTGGAGGTCCGTCTGCAATTTTTGAAGCTGAGGGAAC  
GTGGCCTCATTAGCCCAGATAACAAGAGAGTTAAGAGTGAGAGCTACAGC  
TGAATTAAGTGTGTGATTGTCTGTCAGATAAAGTTGATGTGCTTATCTGA  
AGCACAGAAAGAGAGGATGGGGTATCTGCAGGAAGACATTTTACAGACAC  
TGAAGGGGTGAAATAGAGGATGAATTTTGCAAAAGAAGCTGAGGCTGGA  
AGTGGGGCTCTGAGAGCCATTGACACAGGAGTAAGGACTAAAGATCCAGA  
AGCCTAATAGAAAGAAAGAACTTTTAACAATTTTTAAAAAGATTTTATTT  
ATTTATTCATGAGAGACACACAAGGAGAGGCAGAGACACAGGCAGAGGGA  
AAAGCGGGCTGCCTGAGGGGAGCCTGATGCAGGACTCGATCCCAGGACCC  
TGGGATCACGACCTGAGCCAAAGGCAGATGTTCAACCACTGAGGCACCCA  
GGTGTCCCACAGAAAGAACTTTGAGAAAGATAAGCAGAGGCTTAAGCATC  
TTTGGGAAAGAGCTTGAGAAAGAAGAATCACCACATGAGATAGGAAAGG  
AAAAGGCAAGAAGAGAAATAGATAAGCTGAAAAACAAAACAAAACAAAA  
CCCTGGTTTTGTTTGTTTCACATAAATTGAGTACAAAAATAATAAAATTA  
TTTCTAAATGAACCCAAATTCCTCTAGAGAGAGAAACAAAATTAAGG  
AAGATAAAATTAATTTCTGTCCATTTTTTTCTACTTTCCTTCTAATCTG  
GTGGTCCCCAAAGGGGAAGGGGGGAAACAAGAAGAGAACTTAAAAATGT  
GGTATTAGAAGCTAAAACGAAGAAAGTTTCTAAACAGAAGAAGTGGTAAA  
GTCTATTTACTTTCCCAGATAGGGAAAATCAGTTTAGAGAGAATGCTGTC  
ATTGGTTTAAGCTAAAAGAAAGTTCCAGAGAACCCGTGAAAGAGCTGCCA  
TTTTTGTCAGAGGGGAGAGAAGCTCCCAGGGATTGAGAGTCAATTGGG  
TAAATCTGCTGAGTAACAGAATAGAGAGCATTGAGATTAAGGTTGAACCA  
GAAGTGAATTATTTTTCAAAGAAATGGGAATGAAATTTATCTAAATATAA  
CTAACAAAATAAACATTTTGTTTCATCCATCTATATATATGTTACATTGT  
TAATACCACAAAGCCTAAATTAATGAATTTCATAGTAAAGTTAAATATGGG  
ATGTGTGTTCTCCAACCTTGTTTTATTCTTCAAGTTGCTTTATTCTAGG  
CCTTTTGCATTCTGTGTACATTTTTTATCAGTTTTTCAGTATCTACAAA  
AAATATGGAAGGATTTTTATATGTATTGTTTTCAACGTGCAGACTGATTT  
GGAGGAGAAATGATAGCTTTGATATCAGGTCCTCTCTCTGATCAATAAGT  
ATATTTTCCACCTGTGTCAATTAATTTTTGAAATTTGCCTTCTCACATTAA  
TATTTTATGGTTTTTGAGCATACAAGTATTGCACAACCTCTTTCAAACCTA  
TTTCTAAGCATTTCTTGATTTTTGTTTTCTTTCTACTAGATTAAATGACTC  
GTCATTATATAACACCCAGTGCTCATCCCAACAAGTACCTTTTTTTGATG  
CCCCATCACCCATCTAGCCCATCCCCACCCACACATTTCTTTTAATGT  
TACTGTAGTTTTTGATACTATTTTCATTTCTTTTTTTAAAAATATTTTAT  
TTATTTATTCATGAGAGATACACAGAGAGAAGAGAGGTCAAGACATAGGC  
AGAGGGAGAAGCAGGCTCCCTCTGGGGAGCCTGATATGGGACTTGATTCC  
AGGACTCCAGCCTGAGCTGGGGACCTGAGTCAAAGGCAAACACTCAATCA  
CTGAGGCACCCAGGTGCCCTCATTTTTAATTTCTAATTGCTCATTGTTAT  
ATAGAGAAATGCATTTTATTAGCCTTCATCCTCCAACATTGCTAAACTTA  
GTTGTTAGTCCTGGTAACTCTTTGGTAAATTCTCTGGGGTTTTTTTATGCA

AATTACCATGTATTCTGTAAAGAAAATTTTCATTTTATATCTTCTTTTCCA  
ATCTATGTACTTCTGTTTTCTTCATTTTATTAAAGTGGTAAAACCATCAG  
TACAAATTTCAAATAGACAATATTGTTTTTCATCTTGGGAGGGATATATTTA  
GTCATTCTCCATTAAAGTGTCATGCTTTCTGTAGGTTTTTTGTAAATGTC  
CTTTATCAAGTTGAGGAATTTTTGTCTATTTCTAATTTGTTGAGAATTTT  
ATAATAAGTACACAATTTTGTGGAATGTTTTTCTGCATTTATAAATGTG  
TGTTGTGTAATAAATATTTACTTTGCTTAAATAGCCTAGGACATTGGTTT  
TGTTAATATTGAACCAACTTTGCATTCCCTAAGATCAACCCTAATATGTTT  
TATTTTGTATCTGTTTTTTGTATTGAGGGATTCAGTTTGCTCATATTT  
TGTAAGGATTTATATCTTTATCTTAATAGAAGATACTGCTTTGGGCTTT  
CTGTTTTGTTTTGTTTTTTTTTGTAAATATCTTTAATTGTTTTGTTAATG  
GAAACTGTTAGCTTCATAAAATGAGATGAGAAGGGTTCTCTCTTTTATT  
TTCTGTATGATTGGTATTATTACTGTTGATTTTTTATTGTTTGATAAAATT  
TGCTGAGGGAGCCATTTGGGCCCTAGAGTTTTCTGTGGGGGAATATTTTAA  
GTTATGAAATGAATTTCCCTTACTGGATATTGATCTAGTTCTTCTTGAATA  
AGCTTTGGTAGCGGGGTCTTTAAAAAAAAGTCCATTTTCAGATAGGTTATC  
AAAGTTCTTAACATAGACCTTCTTATCTCCTTAACTTTTTTAAAGTCTATA  
GAGCATGTAGTGATAAGCAAATTTTTTTGGCTCTAATATTGGTAAGTTAT  
ACCTTATTTCTACATTTTTTTGAACAGTATTTGCTTTGATCTCTTAAACA  
GTTCTTAGTTTCATTGAGTTTTTTGATTGCTTATCTATTTTTCTTTACTTT  
GACTTTTGCATTTTTTAATTTTTTAATTTTATTTAGAAAATTCCTTTATT  
GAAGTATAATTGAGATACAGTGTTATATTAGTTTCAGGTGTACAATATAA  
TAATTCACAATTCTACGTATTACTCAGTATATATCATGAAAAGTGTAAT  
TTTTTTTTAAAAAAGATTTATTTATTTATTTATTTATTTATTTATT  
TATTTGAGAGAGAGAGAGAGAGAGATCACAATCATGGGGAGGGGTGGA  
GAAAGAGGGAAAGAGAAACATGAGCAGAATCCTTGCTGAGTTTGAGGCC  
AACTCAGAACTTGATCTCAAGACCCTGAGATCATGACCTGAGCTGAAACC  
AAGTGTGGGTGGTTAACCAACTGTCTCACCCAGGAGTTCCCATGATGAT  
AAGTGTACTATTAATTCCTTTATTTTTTTTTAAATCTATCTCTTATTTTT  
ATTATTGATTTCTTCTGCTTACTTTGGGTTTAATTTGCTCTCTCTTTTTT  
AAGTTTCTAAGGGGAAACCTGGACCATTGTTTTGAATCTTTTTTCATTTT  
TATAAACATTTACTGCTATAAATATCCTCTAAAGCACTGCTTTAATTGCA  
TCCCACAAATGTTAATAAACTGTATTTTCATTTTCATTCAATTCAATTCA  
GTTTCCTAATTTCCCTGTGATTTCTTTGACTCATAGGTAATTTATCTTT  
CTCTTACTTATTTTTAGTTTAATTCCTATGTAGTTTAGAGGACATATTTT  
GCATGATTTCAATTGTTTTAAAGGTTTTGATATTTGTTTTCTGGCACAAA  
ATGAGTTTTACCTCTGTGGATAATATATTCTTAAATTATAATTGCAATTA  
TGCTATTGTTGGATGCTATGTTCTTTAAATGGTTATTAGGTTGAGGTCAT  
TTGTAGTGTTGTTCAAATCTTCTCGTTTTTTTTAAAAAATATTTTATTTA  
TCTGAGAGTGAGAGAGCACAAGCTGGGGCGAGGGAGAGGCAGAGAAAGAG  
CGCGAGAGAATCAACTATTCTATATGTTACTCAGTATTCATCATGATAAG  
TGTAATCTTTTATTAAAAAAATATTTATTTGAGAGTAAGAGAGAGCGA  
GCATGGGAAGGGTGGAGGAAGAGGGGAAAGAGAACTTTAGCAGAATTCTT  
GCTATGCTCAGAGCCTGGCTCAGGCCTGAAATGGGGCTCGATCTCACAA  
CCTGAGATCATGACCTGAGCAGAAATCAAGAGTCAGATGCTTAACAGACT  
GCACCACCCAGGCACTCCCATTTGAATCTTTTATCTTTAGCATCACATCTG  
CTGAGAAGCTCATGGAAGTTTTTCATTTCCAATATTATGTTGTTTATCTCC  
TACGCTTCCAGCATTTCCATTTGATTCTTTTTTATACTTTCTCATCTGCCC  
AAACATGTTGTCTATCTTTTCCATTAGATACTTTAACGTATTAAATCATA  
GTTTTCAAATTCCTGTCTGGGATTTCTCACATTAGTCTAATGTCTGGA  
TTTGTTCTGCTTTTATCCCTTCCTTCATTCCCTTCGTTTCTTCTCCTTAT  
CTCTCTCCCCCCCCACCTCTCTTTTCTTACAATTCATGTTTGAATAGTGGT  
CATTGCTTATGTAACCACAGACTGAGGTAAGTAGTATGTATGGCCTAAAA  
CAAGCACACCTGTTTCTCTGACAGGGGATTAGCAAGGGCAGTTGAGTCAA  
TGCAGTTGGTAATCGATTGGGCTTTGCTGCTGTTAGCTACCTTAAGTGCA  
TGCAGACTTTAAATTCCTTCCACGGTAGGTGGCCTCAGCCTAGTGCCCTG  
TGTGGATCCTGCAGTGCTGGATGGTTTTCTCAGGACTCTTGATCCAGCCT  
AAGCTTGCAGCAGGTCCTGCATGGCTTCATCAGGTGACAGTTCTCTTGTC

CCTTTCCCGGTGATAAACTGCTATTGTTTCGCTACTTGGTGCAAGACTTGT  
GGTGGGCCCAAGTTCTCTGTTCCTGTGCCTGCCTCAGAGCATGTGCCT  
GCCATTTGGGGATAGGGTTTTGCGAGCATTCTGCTCATCCACTACGACA  
TGCAAGCTTCACCTTGTATCTGTGGAGGGGAAGTTCTTGGGTAGGAGGG  
ATTTTCCTGTCTCACTCTCTCCTCCAGAAATGGAGGGAGTTTTGCTTCTA  
TTTTTCCTCAGCAGCACTATGCCATTGCCTGAGACTGGGGGTAGAAATGG  
TAGTACCCTTCCCGCAACTGTGGACAATGTTGCCCTACCTCAGGAGCAG  
ACCTCTTACTTTTACTCCTCACTCAGTAGAGGTATACGTTTGCTTTGAAC  
TTTAGTAGCTGATGCCCTTTGCTTTGTTTCCTCTCTGAGGCAGTGAATCT  
TTGTTGGAACCTTTGAGAGAGAAAAGGTTGCCTGCCCCAGCCCCAGTGACT  
TAGGACCTTTGCTTTGGAGAAGAGAAGTTTCCAAGAAAGTGGATATGGCT  
TCATGCTGAAGGAGACTCTCGGGTCACTTGCCTTATCCCCTGGGTTTCTC  
GTGAATACCAGTAGAGGTCCATGAAAGAGAGGCTGAGGGCAGCCCAGGTG  
GCTCAGTGGTTTTAGCACCGCCTTCAGCCCAGGGCGTGATCCTGGAGACCC  
AGGATAGAGTCCCACATGGGGCTCCCTGCATGGAGCCTGCTTCTCCCTCT  
GCCTTTGTCTCTGCCTCTCTCTGTGTGTCTCTCATGAATAAATAAATAAA  
ATCCTAAAAAAAAAAAAAAAAAAGGCTGCATGTGACAGTGGATTCTCC  
TCAGGTCTAGGGCTCCTGGGTATTTAAGGTGACATATTAACCCATAACT  
GGCTTTTAGGTATTTGCTGAAAATTTGCCTGTTTCTTCTTACCTGTAATT  
ATAGATGATTGATACAACATAGATGATTTATACATCTACAAACATTGATG  
ATTTATTCAATGAAGTAATTGACCTGAGGCTTCTGGCCATCGTCTGCTGC  
CCCAGGTGAACTGTTCTTCACTCTCTCCTTAGAGAAGCTATTATCCTTT  
GGAATTCAGTTCAGTGGTTATTGTGCAGCCTCTGTTCTCTGATAAGGTCA  
AGAAAGGTTATGACTTTATAAATTATCTGGCTCCCCCTCCCTTCAGTTTGA  
GAGTGGGAACAATATTCTTCTTTGTAGTCCCTTAAGCAGAGGCAGAGCAC  
AAGGTTTTGATATTCCCTTCTAAAGTTTATATTTGGTGAGATCTGTCAA  
CCTGTCAGTTTACCTTTATGACTTTGTTGTGTGTGTGTTAATTTTTAAT  
GTCTCTTCCACATTCTGAGAAATAAATATTACAGTTCAATTTTTTTATTCA  
TCACATGGTGTCTTTAGTGTAGCTGGATTTCTTTTCCTAACAGTTAAA  
CAAAGACTTCAAACAATTTATTAATACATCAGTTTCCCCAAGTATTTG  
GCTCCTACAATTTAATATATACTAAATTCCTACATGTATTTCTTCCTTTC  
TGTGTTTACACAGATGTATGATATGATAGGTGTGGTCAATTGTCTGCAA  
GATGGCTGCCAGTAATTTCAATCTAATACATGGATGTTGCTCATCTACCA  
AGAAATGGAGAGTATTTCTCTTCCCGTGAGCATTCTCTGGCCTGAGGAT  
TGCTTTGATTGTTAGAAATTAGGAGTTAGACACACCACTTCTGGGCCTTG  
GGTTTAAGAAGCTTGGCAGACTCTGCCTTTGCTTGCTTAGGGTCTCGATC  
CACCATAACTGGGTTTGGCTACCTGCTGGAGAGAGCAGATGGAGAGCAT  
GACCTTCTGAAGGATGAAAGTCAATGGGGGAAAGGAGGACCTAAAAGATG  
AAGGACCATGAGAAGAGACAGACCTTAGTTTCTTAGCTGAGGAAGCAGGC  
ATGTGAAGGAAGATTTTGAATCTTCCAGCCCAGATTGGGTCCACCTGACC  
AAGCCTACCTGTCCATCCAGGGAGAAGAAAAAAGCTTTGGAGCCATGGC  
AAACCAAAACATAGAAACCTGAGCCAATTTAGATGGTGGTTGTTTTAAAA  
CACTAAATTTGGGGGGTGGTTGTTATGTAACAATAGATTACTGAGATCAA  
TCCAGGTCACATCAGTTAAAAACCAAGATTTGTTAAAAGTGAGAGAAGG  
TGAACCAATTCTAGGAAATTAAAGAGAATTGAATGTGCTTATGATTAATC  
GTGGGGAATTCCTTAGAGGAATTTAATAGGAGATAAAGACCCACTACTCA  
GACTAATGAGAGCTCATAGAAGATAGACAGCATTTATATGTAAAAGATT  
GGTACAAATTTTGGGGTCAGTTATATTGAAATATTCAACTGAAATAATTG  
AAATTATTTCAAGAACATCTTGAAACCAACACACTTGCACTTGGTTTTTT  
ACATCCTCTATCATCAGGGAAGTCCTTTTTTTCAATTTGAAATCCTGAGTAA  
TTCCCCACAAATATGGGCTTTTTTTTTTTTCTTCCCCAGATAGGGTCTT  
ACCTACTGACCACGGATGTGAGCCTTGTTCACACAATAATTGGGTGGGG  
TCCGTCCCTCTGCATTCAATGACCTTTTTTAATACCAACTGTGTATTAGAA  
TACCAGGCAAGATGGTAATTGGGTCATTTACAACCTGTTGACTCCCTGTT  
AGAGACTCAGCATCATTGAGGGATGGAAAGGCAAAGACAAGATTTATGA  
AGGCAGTTTTAGGAACATTAACCTCTCTCTCTCTCCCTGTTGTGTCTACT  
GTTGAAATTAGACAGCAGCCCTTGCAAGGCAAACCCCAGGCGGCAGCTGT  
CAGTATTGGACATCTGGCAGCTGAGCTGTGCTTTGGCACTGATTCACCTT

CTCCACCTCCAGCCCAGCCCCGGAACCTTTCTGAAGCCGAGTATCACAGATG  
CCTGTTCTCTATGTATCAGTCTTCTTGCAAAGCAGCCCCAGAGACACAAA  
GGGAAGAACGATGTGATGGGGGAAGTGTGGGGGAAGGGTTGTCTCATG  
AGACATGTTCTGCACACAGAAGGTGGGACGGCTGTGATGTTTGACATCAC  
TCAGGAGTTATTTACATTTGTAAGCCTGTGATCAGATCCTGCTCATTTA  
TTTCTACCTAAAATGACATGACAGGAACAGAGACTTACAATGGAAAATTT  
TCTACCTGGGTCTTTTATGATTTTCAGCAGAGATATAAACATCCTCATTTT  
TCACGGGAGAATAAAAACTGTTAAACATACATCCAATGGGGCTTTGTGGC  
CTTTCAGTGGAGCACTAGAAGCAAGTTTCTGCTTTGGAGTCTAAATCTT  
TTAAACCTGAAAGCTGACACTCGGAGGTGATCTACTTTTCATGTTAGTGA  
AAGCTGGGTGAATCTTTAAAAGTAATAAACTTGAATAGTCCCCTGGG  
AACTAGGGAATGGGCTTTTCAGGGCAAGTTGATTCATTCAATTTTCAGTCAT  
GTGAAGTTTAAAGAGAAAGCAAGAGAAGGGAGCAGACAAGATGAACAGAG  
AAGGTATGGCTGACTTGAGAGGAATGACCCCTCACAAAGTCATCCCCTTAG  
ATGCAATTTCTCTTGAACCTATGAAGAGAGACCTCAAAAAGCCATGCCATT  
GAAAGGCAAGTTCAGGTAAAAACACCCACAGTAAACTTCTCCCAACAAC  
CACAAATTTGTGCATCTTACTTTATTTTTTTTTTAATACAAAATGAGGAGA  
GCTTTATGGAAGACCAACACTTGTCACTTTGTGGTTTTCTGAATAAATTA  
CTTGATAAGGGGGGTGGGGGGCTAGAGCTTGATGCTTCATAATTCTTTA  
AGAAAAGTAAAAACCCAAGTAGTCTGAGAATATAGTTTCAGACATTTTTAGG  
TCGATTTTCGGTCTCTTTATTAGCTACTTAATATGACATTTGTGAACATAA  
AAGTTTTTTGGGGGGGATAAAACAAAAGCAAAAGATTTTTTTCCACTTATG  
TAGCCAAGTACCTGGATGTGAAAGCTACACGTGAGCTGGAACCCCAAGCT  
CAGTGACAAGCTGTGGATGGGAGGGTTTAGTGTACATGCCGGTGGCTAC  
ACAGCTAGGCTCACCCCCAAGACTCTGGCTCCCATATCTGTTCCCTTTA  
TGTGACCTTTCGCTATCAGAGGGCCATGCTGGGAGAGAGTCAGAATATTA  
TTTTGAGACTTGGGATTAGTACCTAAAACAGCAAAAGAGGAGCTGGAAT  
ATTTGATTTAACTTCATTGGCTGGAGGAGTCTCCTCTCCAAGAACTGTG  
AGTTGCCAGTGGCTTTAAGCTCTTCTACTCTTAGCTCTATGTAACACAA  
ATATGAACATATTTCCATTTCTTTACCCCTTGGGCTTATTTCTGCTAGA  
GGGAAAGTGCTGACATTCAGAGACCTGGAGGAAATATAGAAAATTGGACT  
TTAATATCTCTCCGTTGCCCTCCTACTTCTTTTGCAGAGGTAATCTATTC  
TTTTCTTCCACAGACTTTCCGCCTTCCAGAGGAGTAATTTTACCATATA  
GAACACAGAATACATACAATAAACATTCTATAGGAATGTAGAATAAATCA  
GTCTATATGAAATCAAGACAGAAAGAATTGTTAATATATATGGAGTATAG  
AGTAGACCTCCATTCTTAGGCTGCCAACTTTACTTTATGGCTAGGATTTT  
CTTTCACCTCAAATGTGCTCACCAGAACCCTTCTATTATCCCCATTTT  
TCAGAGGAAAACAAGACCCACCAATACAGACCATCAGATTTTACTGCACG  
TAACTCACATACATGTATAATTTGAGATTTTTGTCTCAAGCTGAATCTTT  
TCCACTTTGGTACCATTAAACTTGGTAAAGGCAAAAGGGACCCCAAAAGT  
AACACCTGCTCTAGTCTCTTTTCCCCTTCCACAGCAGATAACACCCCTGT  
CAAACAGAAGGAATCCATTCTGTGTTGAGCCAGGGCCTGGGAACGTGTAG  
ACTTTGAGGTTGCAAGAATAAGTACTGATTTTTGTAGATGGACTGACTTA  
GTGGCTCCAAGTTGCTAGACGTTTGTCTAATCTTCCCTTCAGGGAAGGGC  
CTTGATTTACTTGCTGTAGGCTCAACCAAGTTTTAACTTTGAGACCGTA  
ATCCTGTGATCAGAAATCTCTTAATTGGCATAACATCCCCAAAGATCCTA  
TAACCCTGCAGTCATGTTTGCATTCTAAACAGAACATGTGTTTCATACCG  
TGTGAAAATGCCAACAGAACTGCCTGCTTAATTTTATCAACCTTCTTTT  
TTAGAGGGTGCTGACAGCCTTGACAGAGAGGCAGGCCTAGCAGCTTGCCCC  
GGCAAACCTGCATTCTGTGGCTTTTTTGTAAAGTGGTACATCAGGAGATT  
AATTCAGCCCCAAGTTTTGCATTTGTATTTTGTACCAATGCCAGAGGTCT  
TCGGAGCAAAAGCATATTTGATACCTATTTATCGTCGTCATGGGAGCCAA  
GGTGATATTGACTTTAGTGAGGTCCTTTGAGGAGAGATGATGAGGAACTG  
GATATATCTGCTCGGTTCTATTTTACATCTATCTGCTGTTTGCCAAAAG  
GTTAAGTTTTCTCCACCTCTCTGTCAGCACTTCCCAACCTTTTCTTCCA  
GTGGTATGTTTGGTATTACCAAAGGAGTTAAGGCATTGCTCATGGTAGTG  
ATGACAAACATGGCAGAGATATGTACTTGTGTGTCCTTGGCTCTAGTTG  
AAGATTTCTTTCTGGGCCTTTTAAAATTTCTTATGTTGGTGGGTTGTGGC

TTAGAAGGAGAAGCCTGAGTCTTCTAAAAGAATAATACCTGTGGCACCTG  
GGTGGCTCAGTG GTTGAGTGTCTGCCTTTGGCTCAGATTGTGATCTGGAG  
ATCCTGGGACCAAATTCTGCATCAGGTTCTGCACAGGGAGCCTGCTTCTT  
CTTCTGCCTATGTCTCTTTCATGAATAAATAAAATAAAAAAATCTGCC  
TATTGTCAAGTGTGAGAGCCCAAAGACAGGTAATGAATGTCAAAGAAGTA  
AGGAAGCAAAGAAGTATATGGAATCCCAAAGAAAGAACCTCTAATA  
GCCCCGAGCCATCTATGAGGGCAAATACAGAAACCATGGGAAAGTGATGG  
TTTATTGACCAATCACTTGGATTCTAAGTCTTTTGTCAATTTGAAACCTGT  
TATGGTTTCATCCATTACTTTAATACACTGCTGGGAGCAAAAAAGAGAAA  
TGTATTTAAATGAAGTGTTAAATCTCAAGTTCCAAATTTGTAAATGAGCT  
TTCCAATGCTATATTTCTAAGCTTAAAAATATCATTTTTCTGAAAGCAA  
TGCCCCAAGATAATTATAACGACAGATTTTTTTTTTTTCTGAAGCACTCTG  
GGCTTAAAACACACAGACACAGACACATACAGACACACACAAAACACAC  
ACACACTTGCCATCTTCCTTTTTCTGATCGGTTTTTCTTCTACCTCT  
AAAGTTTGAGTTCCTAATAAGTGCCAAGCACCGTGCTAAACATGTTAGCT  
AGATTCTTTCAGTAATCCTAAAGTTAATACTGTCTGTATCCCCATTTTAC  
AGGTGAAGCAACCTGTCTATGGAGTCATGACACAACCTAAAAGTCGAGATCT  
GTTCCCTGAGCCTCTGCTTTAACTTCCATCTTGCTGTCTTCCCAGCTAA  
TGAGATTAAATAATAATACATATTCTATAAGCTGCACTTGTTTTTATTCA  
TAGCCACATCTTTTAAAAACAATTTAAGTAGTTTTTGGGCAGCCCCGGGTGG  
CTCAGCGGTTTACCGCTGCCTTTGGCCCAGGGTGTGATCCTGGAGACCCA  
GGATCGAGTCCCACGTCCGGGCTCCCTGCATGGAGCCTGCTTATCCCTCTG  
CCTGTGTCTCTGCCTCTCTCTCTCGGTCTCTAATAAAAAAAAAAAAAA  
TCTTAAAAAATAAAAAATAAAAAACAATTTAAGTAGTTTAAATGTTTTCC  
TTCTATTTACCTGGGGAAAACTAGATTTTTTAGCCAAATTCAGTGATGAT  
TTTTTTTTTAATGGTAATAAACTCTGTGTATGATTAGGTATACCTATGGGT  
AGACATATAGATATATAGGTATATTAAAGGATACAAAAGAACTGTGATT  
GCCTCCAAAGGGGGGGGGGAACAAAACAAGTAACATGGTTGAGGTAAGAA  
CTTGATCTGTTGAAATTTCTTATATGTA CTTCTATTACCTAACCAAAAGC  
CATTTTTTAAATCTAATCCAAATAAACAAGAATAACAGAACTTATTCTC  
CTGGAAGAATGTTGGCTTTCAAGTGGATAAGCAATTACTTGTGAAAACCTC  
TTCTGTACCATCAACAGAACATTATTAGCCACATCCTATTTTCTGCCAAT  
TATTACCATTAAAAATTATTTCAAAGCCGGTGATCTGTTAATTACATTCA  
ATTCCTCTAGCATGTGTCTATAATTTACGCCTTTAAATAAAAAATAGATGGG  
TTTTATTTAGATGCATTGATGCATTCTCCAAGGAATTCATGCTTTCTTAA  
GTCTTAAAGGAAGGTAAAAGTTTGAAAGATCAACCTTATATTTTGGATTT  
CAACAAAGCAGCACAGACTGTGTGTAGTAGCAGGACAAAGTCACGACTGC  
TTTTTTTGAGAGCGCTAGCCAACCCCGAGATGCTGTATTTTGGATCTGGG  
CAACACTATTCACTCGCTCATCCATTCACTTCTTGAATTGTGCTCCATGT  
TAATTAGGTCCTTTTTCAGATGTCCGGTTTCCCTCTGGTGCTGACGATATT  
TGAAGAATTATGGGAGCAAAGGAAGGCATTTCAACAGAATAACACAAAAG  
CAGTTCTAGTAACCTATTCAATTGCTAGAGTCCCAGCTGCTCATCACTAC  
CGACAAAATTGTGGGCATGGCACTCTTGATAGTTGCACAAATGCCAGGGA  
TTCTTGTA GACTCAGATGCATCTTAGTTGAGGTTTGATTTGATCACTGA  
ATCCTTTTTTTTTTTTTTTTTTTTTTTTTTTTTTTTGTAGCCAGCTGGAGTTTT  
TGGCTATAATATGTAAACAATTCTTGGATGAATCATGCTGTGGTCATTGT  
AGACCTCTCACCTGATTGAATAACTAGATCTGTTTTTTGTTTCCTTTTTTAA  
AATGGTGAATGACACATCGGTTAGCATGCATAATCTGTGCCTATAGATGC  
ATAATAAAGTACACATGAATAAAATATTCTGCAGGCAGTTAAAACAACT  
GCAGGTCTGATTGTGAGGGGTGGCACTACGTAAAATGGCTAAGACTTTGA  
GCTTAGGTTTTTACAGCCTGGATTTGCCCTAGTTAGTGCTGTGTCCTGG  
TGTAGGTTTCATTAAATCTCTCTAAGCCTCCGTGTACTCTTGTAGAAAAGG  
TTTGTGTGAGGATTAAAGTAAATAACACGAATAAGCTCATAGTACAGGG  
CATGGTGTTTTGGTAATCAATAATGTGAATTTTTTAAAAAGGATTTATTTGA  
GAGAGGGAGACAGAACAAGCAGGGGGAGGAGGAAAGGGTGAGAATCTCAA  
GCTGATTCTGAGCACAGAGCACCACAGGGGGCTCGATCTCACAACCCCAA  
GGTTATGATCTGAGCTTAAATCAAAAGTGAGATGCTTAACCGATGAGGCC  
GCCCAGGCACCCCATAAATGTGCATTTTTTATTTTTGTGTTTGAGTCCCTC

AGTGTGCTGAAGACAGGCAGGAGGACAGGGGTAATGGAGGGACCCACGT  
AGCTGCTCTGTATGGGTGGGCTGAAATAAAAATTTCTCTGAAAGTTCAG  
ATTTACCTCCTGCAGGCAAAGTCCTCAGGAACACATTCTAATCTAGAC  
TTCTACCTCCTTCCCTGCAGAAGCCGTCTGCTTTCTACGAGGCCCTGAG  
GTCTGCTCTCTGAACCTTTCCCTGGAGGGGGAAATGTTATGCCTTCTTAAA  
CCCCGCCGGCCTACAAAACCAGCTCAAATTTTCATAACCATGAAGATCTTC  
CAAGAAATTACATCCATCCCTCTCTTTTCCCAAATGCCAAGAGAAGAATT  
AAGTAATTTTTGCCACTCATCTTGGTGGTACATCAGTACTCTAGGCTGCT  
ATGACAAACGGTCACAAGCTTTGTGGCTTCAAGCAACATAACTATATAAC  
TATTATTTTTATGGTCTTGTCAACTAGGAGTCTGATATGGGTCTCTTGTGG  
CTCAGATCAAGGTATCAGCGGGGCTTTTCTTTCTTTTGCATAGAAATCCT  
TTCTTGCTCATTACAGGTGTGGGCAGGATTTCGTTTTTCATGCAGTTGTGGC  
ATTAGGTCCATTTCTTCTTCCCTGGCACTGGCTGGAGGTGGCCCTGAGTTCT  
AGAGGGCTCTCTCGGGCCCTTATGCATGGCCTCGACATGTCAGTACACCA  
GTGGTCTTCTGGAACACTACTAGCCTTTCTATGTTGCTCTCTTTAGACTC  
TACTTTCTGCCTACTTCTTCCAATTTTAAGAAGTTGTGATTAGATTGAAA  
GCACCAGGCTAATCCAGGATAATCTCCCCATCTCGAGATTGGTCACCTAG  
ATCACACTTGAAAAGTCTCTTTTTGCCATGTTAGAATGTGGACAATTTTG  
AGGAGTCCTCATTCTGCCTGCCTAGGTCTTTGACAAAATCAGTTTAGGAT  
GGTAATTATACATACACATGCCTCAACTATATACAGTTTTTTTTCCCCCA  
GTTGTCTGTGTCTTGCCTCCTTATCAAGATTCTGGAAGGTAGGGAGGAAC  
AAGGTGGGTGCCTCTTACTATTTTTCTGTAGCCCCAACCTGAGCCACCCC  
CGGTTTCTCAAAGCAAGACAAATGATGGAGAAGACACCTGACAGATTGCT  
GAGTCATTTCGTTCAAGAGGGTCTTTGTAGTCCTAATCTTGTATCGTAAGT  
AGTCAAATTTATAAAGGATTTATTTTTAATTGGAAGACTGATCTAAGAGA  
TTCCCTCTGATACAGATTCTTCCTTAGGCAAATGCCATGAACTTGACTGA  
CCATGCTTGGAATGATCTAAGTAACAGGTGTCCTGATCTTGAAGCTGAGC  
TTCAAGGTTAAGTTTGTGGCTTAGAAATAAAGTTTGTCTAACAGCATT  
TATTAAAATCACGCATTCCAGCAATGGCAAAGGAGACAAAGTGCCCTTTG  
CACGACAGACATTTGTTCTCCAGGAAACAGTATTTAAATGTCCTTCATGT  
TTACATAACTTTATGAGTGGGGTGATTACTTTTTTTTTTAACCTGTATAATC  
TATTAAAATATTAGAACCTCCCCCTCTTAGCTTTCTCTGATGATATTCGCT  
CATAATTCCTTCTACATCTATCCTGTTTTTCTAAGTAAAGCAAATTTTTTA  
AAAAAGCAATTTCTAACATTTGCACATTTTTTTTTTTTCACTGGAATTTTCT  
TTCATTTCTTACTGGGAAATTGTCTAATTATTGAACTCCACTCAAGTTC  
TTCTACAAGGAAGTCTTCCTTTATCCCTTCTCACCTACATGAAGCATGAA  
GCATGTCAGAGTATTTTGTATCCCTAGTAATGAGTGCTATGGTTGACATC  
CTAAAACTAAAATATGTGTATATCAGTTGACTAATAATGGCAATCACAGG  
AAAAAAAATGAAATGACAAGGTTACATCTTTGGCTCTAGAATCTAATCCT  
AATCAATTGCTCCTTCCCTCTCACCCCAGCACAAATATTATTTAGTTTTGC  
TTGTTTGTCCAATATTTATAATGACTCTGTGGTATCTGACAACTTTGACT  
TTTTTTTTTTTTTTTTTAAGATTTTGTTTTTTCATGAGAGATACACAGAGA  
GAGGCAGAGACATAGGCGGAGGGAGAAGCAAGCTCCCCACAAGGAGCCTA  
ATGTGGGACTTGATCTCAGGACCTCAGGATCACGACCTGAGCCAAAGGCA  
GATGCTCAACCACTGAGCCCCCAGGCACCCCAATGACTTTGACTTCAAA  
GAAACCTTTCTTCTGTTGCAGACCTCATAAAAACATTATCTTGAAAGCC  
CTTTCTTGTGGTACAAATGAATGTTAGAATCCCCAAGTAAAAGTAGAACT  
ATTTCACTCAAAGCTAGTGAGGAATTCTGACATTCAGCTGACTGACTCTA  
TAACTCGAAGTCTCCACAGCGTGCTGCACCCCACTTACTACATCATGTAC  
AAACGGTCTGCTTCATTACAATAGCCTTTATCACTCCAAGAGAACTAGCA  
GACCATGTCTCACAATGGTATTATCTACCTTTGGCCCCAGTTTAAATTTA  
AAAAAGATGGCTTTGTCTTACTACCAAAGCATCATTTTGCATCCTCCAAA  
TGCAAACTACATCCACCATTTCCTTTTACAACGAAATTTAAAATTCTCTC  
AGTAAAGTAGTAGTAAACCTTACATAAAGCCTGGGAGGTAGAATGGGGTAA  
GGGGTCACCATATATGAATGTGCTTATTCACCTATTAGTTTCTGTAGAAC  
ATTCTGTCCTGAGGCAAATCCTCAATATAATAAAATCATTTAGGAAAAAA  
CAACTACCACCAGCCTGCACTTGCTACTGATCACGGATTTCAATATTGT  
ATTCTCCCGGAAACCAAAAAAAGAAAAATGATCTCAGAAAGGCCTGTTGT

TTTGGCAAGCAGTGAAATGCAATTGCATTTCTACATATTGAGTAGCAGTT  
GGAATTTTATAAATGGTTAATGCTGGGACGACTCCAGGAGGCATTAGAAA  
TATTAGAGTGGGTAGCGCATTACAGCTCAGCAATTCTGCACAGAACTAAA  
TGTTGAGCAGCATCCATAGAGAGTATTTATGACGTAACCAGGCACTTGAG  
AATATGTTTTTTGGAAGCAAAATGAGTTGATGATGAGGGAAGTTATATAAC  
AAATGGTGCCAAGGTAGGTATAAAGGAAAATTATTCATCAGGAAAAACAA  
GTGCTTTTGGGTATGGAAGACATTTCTAACAATCTCTCCAACCTATAGAAA  
GGAAGCCTGTTTAGACTTTAAGAAGAATGAAAGGGTATTAACAAAGGCCA  
TAAAGTACAAGTCTAGTTGGTATTTGGTTCATGCTTTTCTTTGAATCCTTC  
ACTTTGGACCTTGGTTAGACATGTACACACACACTACACACCTATATACA  
TATGTACCTGTGTTCTGTGTATCATTATACAGTTTCAGACTCCTGGATC  
TTTATAATGAGATCTATCTTTTTTTAAGATTTTTTATTTATTGGGCAGCCT  
GGGTGGCTCAGCAGTTTAGTGTCGCCTTCAGCCCAGGGTGTGATTCTGGA  
GACCCAGGATCGAGTCCCACGTCGGGCTTCCTGCATAGAGCCTGCTTCTC  
CCTCTGCCTGTGTCTCTGCCTCTCTCTCTCTCTCTCAGTCTCTCATGA  
AAAAATAAATAAAAATCTTAAAAAGATTTTTTAAGGCCTTATTAATCTTA  
AAAAGATTTTTTATTTATTTATTTATTCATGAGAGGTACAGAGAAAGAGAGACTT  
AAGCAGAGGGAAAAGCAGGCTTCTCTGCAAGGAGCCCAATGTGGGACTCA  
ATTCCGGGACCCTGGGATCATGACCTGAGCCCAGAGGCAGACACTCAACC  
ACTGAGCCACCCAGTGCCCTGAGGGTTTATCTTTTTAATTGTTAACTGC  
CTATCTCCAATTGTTTCTTCTCCAATCCTCCAAATACAGAGATACACTGA  
GCTGCACACCTCTCCTGTTATTCCTTTGGCTGGCTTGGAAAGCTTGGCTGC  
TTTCACGGCTCCAACGTCCAGAGTGCGGATACTAGATGGCTTCCTGTTT  
GTTTTCTCTGGGACCTGACATCTCTCTACCACTTTTCTTCTCTGTATTCA  
ACTGTCCATCTACGGCCTTTACAATAGATTCCCACAGCAAATTTCCATAA  
TCTTTCTTCTCTTGGAGATTTCTATGCTAGATTTCCCCATTTGGCTTCT  
TTTTCCCAGGTATCCAGGCTCAAAATCCTCACATTTTTAATCCCTTCCTT  
TCTCCCCCAAGGACAGCTGTCTCGCTTCCAGAATCCCCGTGTCTCTCCC  
ACATCTGCCTAGTATCTTTCCTTGCAAGTCTCTAACCTACAACCTTAGAG  
CTCAACTAGAGCAGCAGCAGCAGTATGATGATTGGTCCGTTTGGCTTTCT  
TCTTTCCCCACTCACCTTATCCTAGGCATTACTACCAAAAAAAAAAAAAA  
AAAAAAAAAAAAATAGGCAATTACATGGGTACAAACCCCTGTGTGACAATAT  
CTTCAGTGTTTTCATGATAAATCCAAATCTTGCCTGTCCCTTTATCAGATG  
TACACCTTGAACCTCTACTCTACCCCTATTCAATATATTGGGGAGGGGCT  
ACAAAATTTCTGTATTTTTTGCTCATGTAATTCATCTTCCCTGAAATGTTT  
TTCCTCACACATCTTTATCCAAGTCCTACCCCTTTTCCACAAAATGCAATT  
CAAATTTGATCATGTTTGAGGAAGACCAAAATAATTTCAATCAGTTTAAG  
TTGAAAGTATTTTTTAAAGGCCTTATTAATCAGACCCCTCACGTAGGAAA  
CTTTTTCATAGGAAAACAAGCAGTGGGAGAAGTAGGGCAGTTGTTGTGTG  
CATCTCAACGTGGGAGGTGAGTAACTTGTATGGCATTTCCTGAATGGTGG  
GTGGCAGATGACCAAAGTCTAGGTCTTTGGACTCCAATCAACATCTCTAC  
CTTACAGTGTGAGTGGAGGCATCGTGGCATACTCATGAAGTGCAAATACA  
TAGCTGTCAGGCGGCCCCGATTTCATCCTGGCTCTGCCATTTATTAGGA  
ATGTGAAGTTGGACAAATCAGTAGACATATCTGTTCCATTTCCCTAATCTG  
TGAAATGGGCCCAGCAGTTTTGTGTGAGGTCAAAAAAGGTAATGCAGGT  
AAAGTATTTAGCACAGTGCTTGCAGTGAGGAAAGCTTTCAGTAATGCAGC  
TGCATAAGGCCCTAACTGGATAAAACGGACTTCTCCAAGACTAGAATGA  
CATCCCCAAATACCAGTAGCCTAAAGGTGGAGTTCTTTTCAACCTCATAA  
CTCTGATTATGCATTAAGACTCAAGATGCTTTCCCCTCCCATTCTAGATA  
GGATGGTTTTAATTATACCAGTGAATCAAATGAGATTATACAAGTCCATC  
AATCTATCGTCTCTTTGATATGTTTTCCCTGGGTAAACATAATTTTCAAC  
AGTATTTTCTTAGTGGTTAACAGTGTTTTTACTCCTATAACTGAAATTGTT  
TCTTTACTCTTTAGGTCTCTCACCAGGCCAGGAAAATTAGAGCTTCAGCT  
CACACACACTTCAGAAAGCACTATTTATACCATAGATCATTACTTTGC  
CTGGAAAGCCCGCAATTTAATTTTTGGATTAGCCACACTAATCATCTCCC  
TGAGAACCAGATGCCCCACTGCCAAATTGTACCAACAGAGAGAAGTAACA  
TTCAGCTTTTGGAGAAATTCTAAGTAGTTCCAAGCAGTTAGCAGTAAGCA  
GTATATGCAATGGCTAAATGCTTCATCTGGACTCAACTTTCTGAGTTGAA

ATCCTGCCTCTTACTGATATTGGATCTTGAACAAGTCTCTGTACCTTTCT  
GTA CTGGTTTTTATTTTCATTTTTTAACTTGGAAGATTACTGTAATACATA  
AATGAAACAATGCATACAATCATTCAGATTCTGTTAATAGAAGCACATAA  
AACTTAAATGTTATCAATGTTAGTGTTATTATTTTGATTATCCAAAGAT  
GTGCTCTCTCTGATAGCAGCTTCTCAACTCTTTCCTCTGTGCTATCGACT  
TACGGGCTTCTCTCTTTTGTCTTTTGTTCAGTAAACTGAAAAGAATTTG  
GCAAAGTTACAAGTGAGTAAACCCCAATCTATCAGAGGGCAGTGGTGGGG  
AGGATGTATAGCAGTGGGTGGAGGTCTTCTCAAAATGTCCATGACTAA  
AATATTAGCCATGGTGCTAAGTGACTTCCAAAAACCTGAGATTGCACAT  
ACGATCCCAACTTGTAGCAGCTGCCAGGGATGGCATTGGAACAAGTATCT  
ACTGAAAAATGACTAGAATGTTCTTTGCTTTTCCATAAAGGGAATCTTGT  
TAAGTGAATTGAATAACTCCTAGGGGTGTAATAAGACCTGGCAAATCAGT  
GCTCTTCTGGAGAACGTAATCATGCCTTCTGGAGCTATACCACAGGCACT  
CAATTATTTAGAGGGATCGTCGGGCACCCAGCCCATCGACTCTTGGATAG  
TGTTTTAGAAATCATGAGGGTGCCTATCTGAGCTGCTGAAAAGGGGAAT  
GTCTTACATCACACTTTAAAAATGGGTAACGCGTAATGCACTGGAATTTCT  
CCCGTCACCCCTCTGGTCTAGCCTTTGCCTTAAGTCTGTAGAGACACAAAG  
ATAAGAAGATACTTGCATGTGGAATTTGCAGTGCTTTCTATCACATGAAA  
TTTCTCCTGTTACGTGTA CTTCGGGGGAAATGTATTTCTGTAGAACTGTA  
TCTGCGATACTAAAAAAATAAACTGTTACTAGAAAATAGGATAGTACAGGG  
AAAGTAATCATGATCATTTTTATGAGTATACTTTTCGGTGGCCACAAAACC  
CTTGAATATAGGAGTTCATTTGATTCTTAACTTTTGGATATGCACCAGGT  
GACTTGCCAAGACCACACAGCCAATAAATGTGAAACCGTGACTTGAATCT  
AGGACTTCTGACTTTTTAAATTAGCTGTGCTTTATAATACAGCGTTCTACT  
TAAGCCGTAGATTATGTACCCCATAGAAGTTAAATTAATATTCAATTATT  
CAGGATTTTTATTTACTAAACAGTGTTTTTTCAGCATACAGCATGTGCCAG  
TTTCAAATATCTCTCCTCCCCAGTTCCTTGCTCTCTTAATTGCCAGCCCT  
AAGCACTCCATTCATTTGGCCACACCTTTTCAGTGCTCCAATGGTCCTGA  
AATTTCAATTGTACAGGAGACAGCCTTAGAGTGCTTAATAAACGGCAGGTG  
TCTGGGACTTTATGCCCAAGAGGCTGTGATCCAGGCTGTCTAGTACCATA  
TTCTGAGCAACCTGGCACTCAGCTCGGATTCCAGTAGCTATCTAGGTCTT  
TCCTCCATGTAGATTCCCTAAGCCAGCCATTGAACATTACCATCGTTCAAC  
TCTCTATGCTCCTGATCTTCAACAACACAAACCTATAAACCTGGATCATC  
CTCTCCTCCTTCTTACCTCTCTTCCCTCCTCTTTCTTCATCTCCATCCTAA  
TATCTTAAACAAAGCACCTCCTGAGAAAGATAAATCCAGACTCTACCTG  
TTGCAAGCAAAGCCCTATCAGCTCAGTATCATAGCTTATTAATTATAGTG  
CATTTATTATTGGCTTCAGAGTATCTTCCCCCAGGAGCCTATCTTCTCTT  
CCCCTGGGCCTTCACTAGCTCTACCTTAGAGGAAGGTATTCTAGGGCTT  
CTTTTTAGGTTCTGTTGGAAGGTCCATGGAATATGCAACCTTTATTAGAC  
ATTACACCAAACCTCAGAGACGCACAGAATTCTCAGCCTTAACTCTTGGAC  
CACTCCAATCCTGGTCACAAAGTTTATGGTGTGTCCCAATTAGTCTAGTT  
TCCCTCCCTCACTAGCCTTTAGTCATTTCAGCTTAGATCACAGGTCCTTTA  
TTTGTGTGTTCTGCTAGACTGTA ACTAAAACCTGTTGAATATGTATCTAAT  
AAACTGAAATGACTGCTGCTGTCTGTAGGTTATGGCTCTTGCAATTGCCG  
ACCTGTGGGTCATCACAGGAGTAAGTCAACAACCTTCATCTTACCAGTTAG  
AGGGATTTAGAGTTCTATTCCCTAGATTTTAGGACATCCCAACATAGGCTG  
TGAGCATCTTCATGCCCATTCATCACAGCCAAGCCATCATCTGACGTAG  
TAGATTGGTGATCTGACTAGATTTCTGCCTTTATATCTCTGCCTGGTACC  
CCCTGGGGCTATTTTTGGACCTTACTAATGACACCTGATGATTGAGCTGT  
GAGACGCTCTACCTCTGACTTTGGCTCTAAGCTACAGACTGCAATCAT  
GTTTTTAATATCCGCCCTAAGCAGGTATGACTTCATAGATCAACCTGTAG  
TGACCAGAGATCTTCAACTTCTTCGTTTTAGCCATGTCTTACATTGAAGAT  
TCTGGCAATTCTTGTGGGGTCTTGCTTTAGACCCAGGTTAGTCTCCTTGA  
ATCCTACCCTACCAGGTTTCTTTTCTTTTCCAAGTACCAGAGCCTAAGA  
ACACTTCTCATCTAATACACTGAATTTTGAGAGAAATCCTTCATCTTTCT  
CCTCCATCACCAGTAGACAGCATCAAATTTTGACTAAAGATAATTGTGTA  
ACTGAAGTCTAATCTCTTCCCTCTAGCAATGGTGGGCTGAAGGTTTGGCC  
CTGCCTCATGTTCTTAGAGCTAGGATGAGCGTACATTTGGTCAGCTGATC

ATGGCTAAGAAATATGGAACAAAGGGCAAGTTAATTTATAGCCCAAGTGT  
GTGGGTGAACTGAAGGGCAGGGTAAATCTAAATCCTCTAGGGAGGAGGAA  
TGAGTGAAATGCCAGAAAGGCATCTGAAACACATGGTTGGCTAAAACAAA  
TTGAATTGCAACCTGAGGGGGGAAAGGGTGGGTTTATAAGAGTGGATTTTG  
AAGCCAGTGCAGAAAGTTCCAGAAAACATAAAAAATCCGGAGGACTTTTAG  
CCTTTTATAAAATAGTCATGGCTGCACCTATGATCTGGGAGGCACAATTC  
AAGCACCATGACCAGCTCAAAGAATGCTGGATTGCTCTACTCTCATAGAA  
ACATCCAATCGTTCTAGAGCTTTTGGTTACCTGTCCAAACTGACTTATTT  
CAGCTGAACAAACTATAACCACTGGCAAGGGTACTTGAAAGAGCTCACTAA  
AACAAATGCATGGAGTACTCTGGATTGAGTAAAGAAGTTTAATGTTTGATT  
AAGCTATAACTCTACAACCTTCTGGTACTTTGGTAGTGATATGCTTAGTA  
ATTTTCAATGCAATGTTCTTGTGAACATGATAACTAGATTTATTTTTCTC  
TTCATTTGAGATGAATACTCTTAATATATCTTTATAAATTATTTTTCTCTA  
GGATTATTGACTCCCTGTCTCTTGAAAAATATATCAACAACTAGCAAAG  
AATTAATAATGTAGGAGCCATTAATCTCCAGAGAGACTACACACAGACAAT  
TCTCCTCTTTCCCTTCCCTCAAGGGACTTGAACATGAGGGGTAGGAAA  
GAGCTACTAGTTTGTGCATGCCCTTTATTGCTCTTTGTCTTGACAATATCT  
ACCTATTTTATCACAAACAGGTTCTTCACATCTGTGTCACCTATCCTAATT  
TCACTAGTAAAGGCTGCTTCCTCGGATTTCTAGCTCAGCCCTTTACCCTT  
TGCAAAGATCTTCTTGATCATTATAACCTCTTGGGGGGTATTTTTCTAAA  
AGATGTAGCTCACTCCCCAAAGTGAAAACCCAAGGGGAAATCTACCAATA  
AGCATTACACTCGTATTTCTAGTCTCTTAAATTAATTTGCCAGAAGAGA  
AACTTCAATGGCAAAAACAATTAAACAAAAATGGTGGTGGGGGGGATGAG  
AATGGAGGTGAGTATATTTGTTTCTATTGCTGTTATCACAGATTACCAG  
AAACCAAGTGGCTTAAACAATATACTTATTATCTTGCACTTCTGAAGGT  
TAGAAGTCTGGAAAATGGATCTTTTGGGCTAAAATCAACATAACAAAAC  
TGCAATTTCTTCCAGGGACACGAGGAGAGAATCTGTTTCTTGTCTTACCT  
AGCTTCCAGTTGCCACCTACATTCCTGATATGTGCCCTTCTCATCTCT  
TCAACGTTCTTCTGACCAACCTGTGCTTCCATCTTCAGATCTCCTCTCTG  
CTTTTGACCTTCTTGTGCTCCTTATAAGGACTCTTATGATTACACTGG  
GCCTACCCAGATATTCCAGGATAATCTCAAGCACTCAGTATCCAGAATTA  
ATTCGCCCCCTGCAAAGTCTCTTTTACCCATCAGATCAGGTCATATATTAA  
CAGGTTCCCTGGGATTAGGGTGTGAACATCTTTGAAGGAGCTATTTTTCAG  
GCTACTAAAGGGAGATTTTACATATAAACAGTTTTTTGATGATATAGTTGA  
GCCCTTCAAGATTTATTCTCCTATTTTCATTTGATTCCATTGAAACCCAG  
AACAAATTATAAATTGGGTCTGCCAGAAAGCCCAACTGGACCTTGATGGGG  
TTCAGGGCTCAGTGTTCATTTACAGTAAACCACTCTTTTCCATTATAA  
TACAACCTCTTTCATATATGAGACTTCATGCAAGCAAACATACTTTGTGTA  
GTCCTTCTGCTTCCCAAACTGACTTTGTGTAGTCCTTCCTGCTTCTCAA  
ACTATAGGTAAATTTCTAAATAGTCTACAAGTTGCAATTTAAGAGTCTTT  
CATTTCCACCGTGCACCCGTCTCCCCTCTTCTCCCCTACAAAGAGCAATT  
AAGCAATTCTCAGAGCTCTTTGGCAACCCCTTCCCATAGAAGACTTAGA  
GGTGAAAACATGATTACGGTTCGACATGACTCCTCGTACTCCTAGGGGTC  
CTCATAATGTCCCCTTTAATGTATAAAACTCCTTTTCATTATAAAGTGAA  
CTACACAAAAATTATTTTTTCACTATCCATTTTCACTCTCATATGATTTTCT  
TTTTTTTCTCATATGATTTTCAATTCTTTTTTGTCTGTACTGAGTTTTT  
ACTAAAATATATTACTTTTTGTAAATTAAAGGCAATAAGTGTATTTTTCAA  
AATCCTCTTCAAACCGAGTCAACATCTAATGTTTCAATTCTTTTCCCAA  
GTGTATCACATCAGACTTTAATGATGTTAAATATAATGTATGTGTAATAC  
TGAAATCTGAGAGGACTTAGTAATATTGCCCTGTGTAGACCTAACAAATA  
TAAATCCTATTGTAGACCAAATAGCCTTACCCTACAGTCTGTAACTTTT  
AAGGAAAAACCTAAGGAACCTGAGATGCAGATGATCCAGATACGTAAGA  
TTCTTGGAAGATGAACAGTCAGCCTTTCAAATTAAGAGATTTCTTTTCCA  
AAAGGAACAAAGATAAACCTGTGAGAAGAATCCAAAGGGGCCTAATGTCC  
TATTTCACTTTGCATATCATTTATGAGCCTCTCCTACTCTTGCTAACTCT  
TTCTCCCCAACCTTGGGATGGTAGTGAGATCAGTGATAAAAAGCTGAGAG  
ATAAAGCTGAGAGATATGGTGAGAGAATCTCTCCTATACAAATTCTCTGT  
AAAACCTTTGGAAAATTAAGAATCCAATAACTTATGTTTGGGCCATGTCAA

AATGTCCCATATAAACATAGAGACACCATGCCAATCATTAAAAAACCA  
TGTATCCCTTCTCATTTTCTTGTTTAGCCCATGTTTGCCACAATGCAAGG  
TACACAGGAGATGCACAATTAACATTGCATGAGGTTATAAATATCATGCT  
TGCATTGTTGCAAATTACTTGACATTACTGGGCTATAAAAGACACAAGAT  
AGTAGGATTGTGTAGATTTTGTGGCAAGGTCTGAGCCGGAAGATCTATAG  
CAGAATCAGTTTGCAGATTCCCTTAGGCTTCATATTTAGGATTTGGTGC  
TTTATACTGAAAGTAATTAAGAGTCAGAAGGGATTTGTAAACCAGAATCC  
CATAGCAGGGCAGTTAATACATTTGAGGAGGATGGGGAAAGAATGGCCAT  
AAGTCTGCATTTAGAACTACTGCAATAATTCCCCAAAACGCAAAATAT  
GTGATCTCTGAATTTAGCTTTTTTGGGAATATGTGCCACAACAAAGAATAGA  
TATTCTTTGAATACTAGGTCCCTTAGTTGCATTTCACTGAAATAGATCAAT  
GATTAGGTGCTAGATGTGGAGCGGAGCCAAGGGCGGGGGGGGGGGGGGA  
GGGTGAGGTTAATCAACCTATTATCTAATTATTCTATAGCATTTCCCTCCC  
TGCACAGAACCTTGTTAGTGTGAATAATCAGTAGGTTTGAATCTATGTAA  
AACCATGTAAGAGCAGAAAAAATGTGTGTGTGTGTGGTTCTTTGTGCATG  
TGTGTCTGGATGTTTGTGTATTTCTGGGAGAGAAAGGTCTACCTGAGGCA  
GAAGGAGGAAACAATATTAAGGGTCAATGTCAAATTCTTACTCCCATTTT  
AATGTTGATTGACGATTATTAACACAACCTCTGCCTTAGTATAAACACAGT  
CTGATTTTAACTGATTTTTATAGAGAAATTTTTCCCTAGTAGCTTTAAAT  
CAGATTATACTTTATTCTTCAAACCTCAGTGGCTGATCCACTAGGGATATT  
AAATTCACCTTCTATTTGCATTAAAACCAATGGGACCTATTACATATAAAC  
ACTATTTCTTACCGATTAGTGTGAAGAAGGTAAGCCATTTCCGGTATGCAT  
CATCTAAAATGACTTGAGTGGGCCCTAAAATCTGAATATTAGTAATCGCA  
GGAAAGAAAGAAGATATTAGTGACATCTGTGACTATCTGGCGAAGGGTGG  
GATCATATAGAGCGGCTCTCGTCTAAGAAAAATATTGATTCATTTAAACA  
TATCCTCCCACCTAGTCAGAGAGCAGTGCTAACTCTCAGATGTGTAGATT  
CAACACATCAAAGTCTGATCAGGAAGCCGTGCAGACAGCTATTCCCTGCTC  
ACTTACTGCTTGGGGTTCAATTGTAGATCTCTTTATTACAAAGAACAGCC  
AGGCTACTGTTGTATCATCAACAATCACTTGCTTTTAAAAAACGTCCTG  
GCATATGCCAGAGACGCAATAATAAGAATCTGACATAAGCCAAATCTTC  
CCTCTGCTGGGAGTTAATGTCTGAATCTGCAGTCAGAAGCAAGACAGGGG  
GCAGGTGGAGGCAATGCAATGCAGCACCCAGTGCCCTATTATAAAGGA  
GACCCCACTAGGGGCATAGGTGGCCTTAGTCTAAAAAGGGAATAAACGA  
GTAAGTGATTTTTAAGCAAGGTCCCTTCTGTGCTACAGCTAAAGGATGAG  
AATGGGACATATATCTTTGCAGTTTTATATATTTTCAATTTGCATCTAGTC  
CCAGCCATTGATGTTAGAATGTGACACGATCCAGTCTGCTGGAAAATACA  
GAGAACGATCTGCCTCTTTCTCTACTTAAGAATTGCCCTCGAGACTTCCG  
CTTTCTTACTGTTACCCAGATTGCCAGTCAGGAGCAAAAACACCTGCT  
ATCTATGTGAGTTTCCCCAGCTGGAGAACACTGGATCTGTTAGAGGAAGA  
CCATTTGCATCTCATGCCAGTCATATAGAGTTTTTGAGGGTTAAACGATC  
AAGGTACAACAGGATGCAATGAAATGAAATCTGTGTTTGCTGAAATTGCT  
GAATACCATAATGGCATTAGATGAACAGAGAGCTTTGATTAAAAA  
AAATCCAAGATCAAGCCTCTTCCAGCACTTTCTCCTGTTCTATAATTTCT  
TGCTTGTGCTGCTGTGATGCCAATGCCTTTATTTTCATGCCAACATGGCAAC  
TGATGGTAGTTGAAAATTTTCAACGATTCCATTCATTTTCATGGCCACTG  
TTGGATGTGAAAACCCAAACAGAAACATGTCAGCCTCTAATAGATACCTC  
ATCACCCAAAGCACAAAGGTAGTATGAATTCAGTTACAATAGCAGCAAAA  
ATATTTTCGTAGAGGAAGGTGACCTGCATTCTGAGGGCGTGTGCCAAGAG  
GAGGTGAGGTCCCTGGAACCTAACCAAGTCTTTCTTCAAGGGAGCTCATG  
TTCTCACCATTAACAGGAAGAGTTTTACAAAGAAAAAGGAGGGGAAGAC  
CTCTACTTTAAGATAGTTCACTTTTTTTTTTCTGCCCCCTAAGTAAATTTT  
AAGTAACTTGATTACTTTTCAGATATTTGTTTGCCTGAAAAATGAGCATCT  
TTTTCGTGTGATTCTGTACTCTGTAAGGGGGCCTTCTTCTATCAACAGCCT  
GAAAGGTAAAGCAGGATCAGCCTGGAGTTGGGTTTCTGATACAGGTTAAAA  
AGCCACAGCTCTTCCAGAAGGTGGTAAACAATTACTGGCATATTTTATT  
ACATACACCTAGGAGTTTGAACACAGCAGAGACACTTCCTACTTCAGAC  
TGCTTGGAGTTTTAAGGGACCCAGAGCTCCTAATCAGGGTGAGGAGATTG  
TCTGAAACAAGGCAGCGTCAGAGAACCCGCATTGCCACTCACCTGTATCA

GGTTATAGCTCAAGCAGAAGAAGATGATGCACTAGATTTCTGAACCAAT  
GATGAAAAAGAGTTAGCTTGCGGCTGTGCCCAGTCATGCCTGACCTGTGT  
ACAAAGAAAAGAATTAGCCTCCCTATTAGTCTTTCTCCAATTTCTGGAA  
AAGGGTAACTTCTTGCAATAGAAACATTCAGGTTTTAGTCATGTTAGCAA  
TAATTGTGGCAAAGATCCTATTAATATGTCCTACGACTTGGGGCAGTAGG  
TAGACCATGTCTTCTTTGCGTGCTTTTGTGGTTTTTCTGTTTAACT  
TTTCTATCCCTTCCTGTGGTTATCTTTTTAAAGTTTCCAGTTGTTCTCT  
CAAAGCCTAGAGCAACAAAAGCAACAAGATTAAAGAACAAGAAAACAGAA  
AGGCAAGTCTATTTTTTCATCTATGTCCCCACTGAAATACCACAGTACTTC  
CTGTAACAGGTTGAACGAGCTAGTTCGTGTCCACAGAGTTTCTAGTGCTT  
CGGGTTAGAAACACTAAATCATAAAGTAATTTCCCTTCGGTGATGATAAT  
TAAATAACTTTACAAGAAGGAGATTTCTAACAGAGGAAGACAGCGGGAGG  
TGAATCCTTTGTCCATCCCTCCCATGTGGCTAACATGGCAACGATGTTTT  
CCTGATCTCCGAGAAGTGAGATGCTGTTATCATTGTTAGAGATTTTTTTT  
TCCCCATTGTTAGAGATATTAAGTGACACTTTGGATTTAAATCTTCCAAA  
CTAATTGACAAGCTACTTATTTCTTAGAAGGCAAACTGTTAAAAGAGAAG  
GCAAAATAGGTATAGAGATTTTCGTTTGGTTAATCATCTATAGTGAAATAC  
TATTCAGTTGATAATGGGCATCTTTGAAAAAAAAAATCTTACCTTTTTTAC  
ACAAGTTAACCGAATTCAATTTGCCACTCTGTAGCAAAATTTTAAATTA  
AATCAGGACCCAAGTGTAGATAAAGAAGGGCCACTTCTGAGTAAGAGAAG  
TTGGCTAAGAAATACAATTTTGCTGAAATTGGGCGTGCTCTTGGCTTATT  
TGAAAACACTCAGGTCCACTTGAAAATATTCTATCTGGAAGCATTCTATA  
TCCATGGATGCCACAGTCACATGGATTATATTCTATATAAAATGCTCACA  
TTCACAAGAGTACCATGAGTACACAGATCAGGGATTGGCAAACCACAGTG  
CATGGGCCAAATCTGGCTTGCCACCTGTTTCTGCAATAAAGTTTGTG  
GATGAAAGCTCCGGTCATTTGTATAGATGTGCTCTGTGGCTGCTTTTGCA  
CTACAATGGCAGAGGTGGGTAGTTATCACTGAGAATATACATGGCCTAAA  
ATATCCATAATCTAGCACTTTACAGCTAAACATTGCCCACCCTGTGTAGA  
AGGCTTCAAGTTGTAGCATATTGTTTACTATTTCTCTTTCCCTGGGCAG  
AGATGATGGCAGAGGAGCCCTCCTGGCTGCGTGTGTATACAGAGGCAGA  
CAGATGCATTGATTAGGGCCTGCCACTTAGGAGTGAGTTGATAAAATTAG  
TCGTTGTCACAGATTTTATTTCTTCTGCTGTCCATATTTCACTGATTCA  
TGCTGTTGCACAAAGGGAGTACACAATTAAACATAATTAGTTGCCTATAG  
AGTGAGCGACCCTCGCTTAGATGAATGACTTGAATTGCATATTTATCCCG  
AGCTAGGATCATCGCCAGCAGTATGCTATTGTGTGTAATGAACAAGCAGA  
GCATCCTGGGAGTCTTTAGATCATAGCAAATAATTGAACCATGGTCCAAA  
ACAGAGTTCCCAGATGCCTAAAGTCAGGGCCTCCATCCACCATTCTTCAG  
ACACAGCATGGCGCTCGAAGCCAGCAAAAATAGGTAATTGTTGATTCTGC  
CTTAAAAATAAAAGTTTAACTTTAAAAAATAATTTATTTAAGAACAAA  
AACTTTATTTTTTCTTTAAGCTCTAGCTCTATGCCAACATGAGGCTTG  
AACTCACGACCCTGAGATCTACCCAGGAGGCCTCACTCTCCCCACTATAT  
TATCATGGTGCATAATTTTGACACTGCCAAGCCTTATTATACGTATATAA  
TTAAGCAGTTACTGATTCCACTTGCTCTGCTGCAAGCCTGAGGATGGCTA  
TTTAAACAAGAGTGTGAAGCTGTCATTAACACTAAACCAAGAGTAAACAC  
AGGGAGATGACAGGTGGTTTTGGGTGCCGGTAGTGATGGATCACTCAGCC  
ATAGTTGAGCTTTGTTTTGTTTTAATGTACATGAAAGCGTAAGTGATTA  
TCTCATGTAGACTTCACCTTAACTCTGAGAGGGAAGAGGAGGGCAAAGAT  
CAGCATCGCTGGTGTCTGTTTCATGGGACTCATTTACTCATCAACACTTTA  
CAGTGAAATTGTAAACAATCAAAATATTGTAGAGGCGGGCACCTGGGTG  
GCTCAGTGGTTGAGCATCTGCCTTTTCGGCTCAGGTCATGATCCTGGGGCC  
CTGGGTCGAGTCCACATCGGGCTCCCCACAGGGAGCCTGCTCCTCCTT  
CTGCCATATGTCTCTGCCTCTCTTTCTGTGTCTCTCATAAATTAAATAAAA  
TCTTAAAAAATAACACAAAAAATACTATAGGGGAGAACTCACAACCTCAG  
AATCTAAGATTTTATGTTTATTTAGTCTGCAGAATGACAGGATTCAGTGA  
TCACTCAAAATCCTATAGTTAGGAACTGGCTCAGCAGAGATTAGAATCCA  
GGTAACAAGCTACATTAGCCTATGTAGCTAATGTCTATACTGACTCAGAA  
TGACACCTATATATGGAGCACTTACTGGTTATTCCCCCTCCAAACCCATT  
TATTAGTTTCTGCTGTGTGCCAGGCATTGCAGGGAGGGCACGGAAGATGG

AGCAGTAAGAAATGCATTAACACACATTTATTTATTTAGTTACTTTTAA  
CCTACCACAACCTCTGATGGCTCTTGGAAGAAAAAGAACAGGGTGCTACC  
AAACACGTAGCAGGAAGTCCCTACGGACGTCAGAGGAAGTAAATTTTCAG  
GTACGTCTAAAGGATGACTGGGAGTTTTGAGGAGGTTGAGAGGAGGAAGA  
TGCGTGGATACAGAAAGAACATTCAGGCAGAGGGGGCAGGAAGTGTGAA  
CACTCCGGACATAAATAATCATGGTGAATACTCACCCATTCTCCCTGAAT  
TCAAGCTCTACCCAATGCTGATTTCCCTGGTTCTTGACACACATTCTTCCT  
CTGGCCTCTTTATTTTCTTCTCTTCCTACTTCATTTACCCCCACAGGGTC  
CTTTTCTCTGTTTCTTTCTTCCTTTCTTTCTTTCTTTCTTTCTTTCTTT  
CTTTCTTTCTTTCTTTCTTTCTTTCTTTCTTTCTTTCTTTCTTTCTTT  
TTTTAGATTTTATTTATTCTGAGCGACAGGGAGAGAGAGGCAGAGACAC  
AGGCAGAGAGGGAGAAGCAGGCTCCATGCAGGGAGCCGATGTGGGACTC  
AATCCCAGGTCTCCAGGATCACTCCCTGGGTGGAAGGCGACACTAAACTG  
CTCAGCCACCCAGGATGCCCTCTCTGCTCCTTTCTTAATGTTGTTGACCC  
TCAGGGCTCTGTCTTGGATTAATTTGTTCCCTTGATTTTATTTTTTTGAT  
TGTATTATCCTCCATGGACTTAATTACTATCTCTATAAGTAAGAACCAAC  
TCTCCCTATCCAACCTCTTATTATTTTTGAGAGCAAATCCTGTATATTTGG  
CTGGCTACAAGAAGATGGTTCTCATTCCAAGTGTTACGGGTATCTTCACT  
ACCACTTGCTCCCCAAAAAATTATTAGTCCCCTCCAAAACCTGTTCCCTGTT  
CACTGCTGGGTACAAACTGACCTCACCTGAAACCTGAGCATAATGCTTTT  
GACTCCTTTTAAACAGGTTCTCCCCCCTTTTAAATGCAGTTCTGCTAATT  
CTGCTTTCCAAGCTTCTCTTGAATGTGGCCCTTTCTTTCTACCCCCATTG  
TAATTCCCTTGAGGTGCTTCCTCTGTGACACCTACATGACTACCTGTATC  
ACCCCATACCCAGTCATCCCCACCACAGTCGGAATAATCCACCAAGAACA  
CAAATCTGAGTGTCAATTCCTATTTACACTTCCATTGCCCTTAGGATAAG  
ACGAGCACAGGACTCCATTCTGATTCCCACCTTTCATGACTTCAGTCTCA  
TTTCTTGTCAGGCCTACATTCCATATATTCTCAACCACTTATCAGGCTGT  
GCTCTGGACTGTCTGCTACTCATTTTCCACGTTCTGCACTTGACCTCAGA  
GCATCTGTCACTCTTTAGTAGGTCAGACCATTCTATTGTGGCTCCATAGC  
TTTGTAATTCCCCTCCAATGTTGCACCCCTCACACTTTATAATGCTGCTT  
ATTTGTGAATCCAGGACACCCACCCCTCTAGCTTATCATTATAACTACAT  
CATCCAGCATGGTGCCTGGCATATAGTAACCATGTTATCAATACTTGTTG  
ATTGACATGAATGGATACTATAACTTTGAGAATCATATAATTATAAAATC  
AGAATAACACGAGATTTAGATGAAGGACAAGCCTGAATCTTGGGTTTGT  
TCCTTATTTTTTGTATGCTTTTGACAAGTTACTTCAAATTC AACCTGTAA  
AATAAGTTATGTCCAACCTCCTAAGGATGTTAGAAAAATTAATAAGATCTA  
TAAAAGACTGGGCACATTTAAGTGGCTAACAAATGGAAGCTTTTAGCTGA  
TTAATTTATTGTCTTAGGAAGTGGAACCTGCATCAAATGCCCATGAGTTT  
GGAGAGCCCTGGTGGGATCTGACATGGCATATACCTTCCCAGCTACTTA  
ATTTCTTAAACTCTCAATTTTAAATTTGATTTTCTGAAATCTTCTGTCCA  
ATCTGCCAAGGAAAATCTACTCACAAGGAGTCACATCAGATACCACAGAT  
GTTTCTTACATAGAACTTACTTCACAGTTAGAAATCCCTTTGCCTGGTTA  
GTCACAATATTAGTTTTCGATTGCTGCAATAACAAAGTGCCATAAACTGG  
ATGGTTTAAAGCATAGTTTTGGAGATGAGAAGCCTTGAAATCAGTTTTAC  
TGGGCAAAAACACTGCATCAAGCAGCACTGAGCTCCTTCTGGAGGCCTGT  
GGGGAGAATGGTTTCTTTATTTTTTCCAGCTTCTGCTTTCCTAGGCTCAT  
GGTTTGGTTCCCTTCAGACCTCAAAGTCTGTAATAGTGGATCAAGGCTTT  
TTCATACTGTCTCCTTCTGACATGGACTTTTCTGCTCCCTTCTTCTACAT  
TTAAGGATCTCATATTCCATCTGAGATCTGAATGACCCATGATAATGCC  
CTTCTCTTATATTCAATTATAGTAACCTCTAATTCCGTCTCCAACCTTA  
ATTCACCTTGGCCATGCATAGGGACATAGGAATGGGTTCTAGGGATTAGG  
ATGTGGACATCCTTGGGAGGACATTAATCTGCCTACCAGGGCCACTCTAT  
CAGGCACGTGACTAAGGGCTTTGGAAGTCCAGTTAATGCTCCCAAATGTA  
CTAGGAGGTATTATTCCATTTTATGGATAAGGAAATGGAAGCTCTGCAAG  
ACTTGCTTTCTCATCAGTCTATCTGGCCATTGGCAGAACAGGATTCTGA  
GTATCTTTCTACCACCTGCCATTGAGTTGTGTTGTTGCATTAGGTCCTGA  
AACTTCTCTTGTAGAACCCTGATTCTCTCTTCTCCGCAGGGACAGACTCT  
AGAGGTTTGTCTAGGTCACCTGTGAGATGAATTTATCTGTGTAGACTCTTG

GCAGGTCACCTGAGATACATTTTACTCACTCTGCTCTGTGATACCAGCAC  
TGGTGAAAGGAAATACTCAAGCCAACTCCCACTTTCAATAAGAAACAGGA  
GCATCCCTGGTACAGAAATCCAAAAACAAAATCCGTAATTTGTGAAAAT  
GGAAGTAGCTTTAAAGCCTGTAAATGGGTTGATCATTTTGAATACACACA  
TGGCTACCCTGAAAAGACCCCTATTTTCATATACTTCTTAATGTCAACATG  
ATACTGAAAGAATTTTCTCTATAGGAGCAAATTTACTCCTCTCCTATATA  
CTGAGTTCTGTGGTCAATGTCAATTGGCATGTATTTCAATGTGTTTGA  
GCTGTTTATGGAGGTGTTGAAACCCCTGTATTTTCATGAATCTGATGTTACTGTG  
TTAATAAGCTCGATGGCAATAAAAAATCTAGGTCTGGAACTTAAAAACAC  
AGGAAGAAGATCTAAATCAGTTTTTACTGAGTGACCTCTTACAAGCAATCC  
AAGTTCTGTTTAATAAACCCCTGCACTTTTTTTTTTTTTATGGGAAAAGT  
AAGGCTGAGTTCTATTCTCACACCTCTGAGGTGATGCCACAAATGAAACC  
AAGTTTGCATAGTTTCAGAGTAGCCGGGGAGAATTAAAACTTCCCTTCTCC  
CACCCAATTCATTACGATTTCTGTTCTAATTCCTTTTATCAAATGCTTCCT  
TTCCCAGGGTGCAGATATGATGCTAAAAGCTTTGAAGATAAACTTTGTTT  
TAGTCCATATTTCTGTTACCCCTTGAGGTTTGGGGGCTGTAGTAAGGTAA  
AGGGAAGAAAGGGAGTCAGCTCACAATTATTCTAACGGACGTAAGGACAG  
GTTTAATCTTGGCTCCAATCAAGTTCACCCAGTAGAATGATATTAATA  
CTTTTCTTTCCATTTCTTTCTTAGGAAAAAGAAAGAAATAATGTCTCCT  
TGCACTGGAAATATACAAGTCCCTCTTGGGATAACAAACATAATTCATTC  
TCACTCAGGCAACCGGTGAGATCACTTCCCGGTTGCTGAGCTTATAGGTT  
ATTGAAACCACTGGGGTTTTGTTAAAAATAGCCATCTAATAAATCTGCCC  
CTTCTTTTAACTAGGATAATGGTGATAACTTTCTTATGGGTTATTTCTCT  
CCTTTTAGGACAACCTTTTTAAAAAATCCCCAATAATGCATATGTCCTGTA  
GAGTTGAAGGAAATTAAAAAAAACCCCTGCTGTATTGATTTTTGTGATTGG  
CAAGTGAAGGTGCTAAGTAATTCAGTGTAGTGACAGGGGCTCAGTCAAG  
ATCATGCAGTGTCTTCTTGAAGTGAAGTGAAGTGAAGTGAAGTGAAGTGAAG  
CCATCCTGAGCTAACTTATCTCTTTAAACCTGATTGAAAGGGAAAAAG  
GCATTTTCCCATATGTTTTCAGACCAAATGTAGGGGTGCCTTCCTTTTA  
CACTTTAGGGTCTTCTGAAAATTATGTTAAGACAGAAATAAACTCAAAT  
GTCTTATAAGAACACCAGAACACTTATTTACAGGAGACAAGTGATAAAAC  
AGAAAATTGAATTCTTAGGCAAGATCACTGGATTCCCTCTTTGTAGTC  
TGTGTTGCAACAAAATAAAGCAAAATCAGAGGACACTGGGCCTCAAGTCA  
TGGTCCCTGGATCCAACCTCTGGGAATGCCTGTCCACATTAGGGACTTG  
AGTAATGGCTAAACCTCGTGACCTTTCAATTTATTCAACTGTCAAAGGTG  
AATGATAGTACCCTCTCAGTTTTGTTGTGACTTACATCCATATGTTTCAT  
TTACTATGAATTGAGCAGATAATAAAACAGTAGTAGTAGAACTAAGCTT  
CATGGAGTTTTCTGTGCACTTGGCACATTCATGGCCTAGAATGGGTACAA  
GCATGCCCTAGATATTAATGTTTTCTGGCCCCCTGGGAAACCCAAATGGTCA  
GATAGCTTGCCTTTGACCTCAGGCAGCAGCATCTTTCCATAATGTGTGT  
GGTATAAATACCAATTTATTTTAAAGATTTTATTTCATGAGAGACAGAGAG  
ACAGACAGAAACCTAGGCAGAAGGAGAAGCAGGATCTCTGTGGGGAGCCC  
CATGCAGAACTCAACTCCAGGACCCCAGGATCACGACTTGAGCCAAAGGC  
ACTCAACCACTGAGCCACCCAGGCATCCCTAAATACCAATTTATATACTA  
TTTATGCACCAATAGCATTATATACCAATCCAATTCTCCAATGTTCCAA  
AGCACAGAAGATTGAGAAGCCTGATAACACATACTATCAGTTAAGTTTAT  
TATAATGCATTTTAGAGTTTCAGGGGATAAAGAAACATAGTGAAGTTAACT  
AAATTGACCGAAGTCACATAAGTAAGAGGCAAACTTGTCATTTGATGACT  
CTAGGTTTATCTGATTGTGATGGGTCATTTTTTTCAGGGTCAGCTTGACTG  
GGCTAGTGGATGCCAGAGAGCTGGTGAACATTATTTCTAAGTGTGTCTG  
TAAGAGTGTGTGTCAGAGAGATTAGCAATTGAATAAGTAGACCAGGTAAA  
GATTTGCCCTCATCAGTGCAGGTGGGCATCATCCAATTCATTGAGGCCTG  
AAAAGGACAAACAGGGTAAAAGAAGGGTAAATTTTTTACTTTCTCTTCTTG  
AACTGGGATGTTCTCTTCCCTTGGCATCCTACCTTGAGCTTCTGATTC  
TCAGGACTTTATAGACTCCAGAGCTTACACCAACAAGGCCCTCTGGGTCT  
CAGACTAGGATTTATACAACCTGGCCCCCTTGTTCTTAGGCCCTCATAAG  
GACTGAATCATACCACTGACTTTCCAGATTTTCCAGCAGTTGGTGTGACT  
TCTTGGCCTCATAACCCAGCGAGCCACTTCTATAAAAAAAAAAAAAATAA

TCTGTGTGTATGTATGTATTTTGTTCATTTGTTTTCTGAAGAACCCTA  
ACACACTGATTAAAGGCTATGCTCTTATTTATCAAACCTACTGCAATTG  
TCAGTAATATTTAATAATAATTAGTAATAATTCCAGTTCACCATTGACTC  
ACAAATTGGCCGTGTACACAGAGGACAGGGAGAGACTGAAGAAAGAGACT  
GCCACTCCACATGGGCAGGTGGCAGGTTTAAAAAGAAATGTGACTTATAT  
GCGAGTCTTGTCTTGGGTGGCCACAAGACAAAGCAGACCTCTGCACCCAC  
CCACCAAGTCTTAAAAGTTTATGTAGAAGGTTTAACTGGGCTCAGTCATG  
TTCAGTCCAGATGGTCTCAACAACACCTTACTCTCAGGACTGTTCTTGGA  
ACAGCTCCCACTGTGGAACCGTAGGTAGAGCATAAATTCTAAGAACAGG  
GGAGGGGATGAGGAACCTGCTGATTGCTCAGGCCCAGCTCCTGGGTCAACC  
AGCAGTCATGTCCTCTCAGTGACCTCCTCCAACATTCAACCTTTTTTGAA  
GGAACATGATAAGATTTTCATTTTCTTGTCTCTTTTGAGGTTAGGTATGG  
TCAGTGATGTGCTTTGGCCAATTAAGTATAAAAGAAGTAACATGATTCAA  
TTCTTGGTAGAGGTTTTCAGAAAGCCTCCTTTCTCACTGTGGCAGTGATTAC  
AAAAGCCCAATCAAGATGAGGACTCTGCCAACCCAAAGTGTCACTAGAACA  
GACCATAGCGAAAGAAGCCATCTTATGTAGTATATGTCATGTGAGCTAGA  
AATACATTTTGGTTTTGTTAATACACTAAGATTTGGAGGAGGTTTATAAC  
CACAGCATAACCCAGTCTCTCTTGATACAATTAGACTGCTGCCAAATATG  
TAGTAACTGTTTCATGGTGTGCTGGGAAATTGCCTCTTGGAAGATGGAAG  
AGGCCCTTCATTTGTAATGCTGGGTGAATTTTGCAGTGTAATACTCCCAG  
TATGGCCAATTTTAAGCTACTTACATAAGAGCACTGAATGTAGGATTGAA  
ACCAAATGGACAAAGAGAACAGATGAACAGAGGGGAAGGGAAGGAAAAAT  
AAGATAAAAACAGAGGGGTCAAACCATGAGAGACTCTTAACAATAGGTAA  
CAAATTGAGGGTTGCCAGAGAGGAAGTGGGTAGTGAGGTAAATGGG  
TGATGAGCGTTAAGGAGGGCACTTGTGTGAATGTGCACTGGATATTATAT  
GCAAGTGATGAATCAATAAAATAATACCCCTGAACTAATACTACACTATA  
TGTTAACTAACTAGAATTTAAATAAAATCTTGAAAAGAAAAAATAGAAAA  
AGAAAAGAAACCAATGGGCAAAATTAGTTCTGGCAAGCCAGTAGGAGGCC  
TGCTTTAATATATCACTTTCTCAGGGTATATGGTAGCGTGTGAAGTTGTG  
AAGTAGATGTGATTCCACATTTTCATTGAGCTTGCAGCCCAGAGAATTGAC  
ATTAAATGGTATAATAAAGAAAGATGTATATGTATATATATATATTCCAT  
TTTGTCAAGAATATAGTGACTGAAGTAAGGATCTTTTCTATTCTTAAGCA  
CAAATCTTTTCTAATCTGAAATACACCAAGAAGAAGGTGTTAGGATGCTT  
CCACATGGCGACCAACAGCTACGTGACTGATGGAGTCTGTGTCATTTCCA  
AGTCATAAGATTCACTTTTTGAAATAAGCATCAATCCTAAATTTAGAGAA  
TTCCATTAGAAATATACAGTACAATAATATATACTGTAACATTTATATAC  
GTTTTCATGACACCAAATCTCTTTTGGATCAATCCAATTTCCCTCTGAC  
AGTCTCGTTCAAATTATAAGATTTTGAATAATTTAGCATCCTTAAAGAC  
ATAGGATTACTATACATAGTCCCTCTGTGGCAAAGACTAGTAGATGTTT  
ATCAATCCTATTCTATTTTCTAGACACACTAGAAGACTACCTTTTTTCAG  
GCTCTCTTGTGGTAGCTTTGAGACTAGGGACAAAGTGATATATACCATGT  
CCAGATCTAGCCATACTTGATTTTGCTTGTCTATTGCCAGTTGGCTGG  
CTGATTACAGGGAACGTGTAAGGACTCCAAGCAGACTGGAAGGTAATGAG  
ATAAAAACAGAGTGGGGGGGGGTGTCAAATCATGAGGGGAGAAAAGCCAG  
AATTCTTAGGTTATTGGTGTAAGCCCAGCTGCTAAATGCTGACTGCACTT  
TCCGCTGAATTATTCTATATTGTAGCAGCTAGTGTTAATTACTCTGGTAT  
CTCTTCTTATCCGGGAATCTATTATATTTGTGTGCAACTAAAAGCATATT  
ATTTTGGAATTTTATATATGCATGAAGAAATTGGAGCACAGACTATTTTCAGT  
GAAACAATCAGATAAGCCAAAACACAATTTAGATTATCTAAGCAGGAACA  
GAGGTAACCCAGAAAGAATATGACCTGGCTTTATCCCCGAGAATTACAGAT  
TGCTGAAGATAGAAGTGAATAATTGTTTCATGCATCTTCCAAGTAGAGGA  
GTTGAGGTATTTCTCCCTCTTCATTCTTAACCTCTAAAAGATTAGCCAC  
GGAACCTTCCTAATAGGAAGTTATTTTGAATAATTTCTTTTAACAATGA  
TTAGGAGAACACTATGGACTATTGTTGAACTAGCAAATTTTGTTTAGAT  
ACAAATGCTCCAATTCTGGATATATTAACCTCCTCACAGCCTCCTTCTGTT  
TAATTCTTTGCGATGCTTAATGTGAAAAAGGTTTTAGCAAATGTTTGCTAA  
ATTTCTGTGATAATAAGGATTTTTTAAATCAAATGAGTAATTAATAGTCTG  
TGGTAAGCACAGTGTTGTACCATCCAGAAGATTCTTGAAGGAAAGACCTG

CTGAAAAGAACATAATCCGCAAAGGCCCATTAACCTCCTTCAGTGTCTTCC  
TTAGCTGCAGAAGGCTGTTCTGCCCATGGTCAGGCAACGCCTGAATGTCA  
CTTACTCAGTGACCCTCACTGCTGGGGTGACCAGTGATAGTCACTCCTAA  
ACTCCAGGTGAAGCTTTATGTTGTTAACATCTGGGCTGATTTCTCCCTCT  
GCCCAGTCTTGCCTCCTGCCCCCTTCATTTCTGAAGGGGTTGATCCTAATTA  
AACATCATTTCATCTAACTCTATCTTTAGCATCTTCTGGAGAACCCACC  
TTGTGACACAGACCATTGAAGGTCTAGCCAACGTATAAGAATAGACATAT  
TTAAATGCAAATTTAAATAGAAGTTGCTCCATGAGAGGACACATGGGTCT  
GGTTATCTGCTAATGTTTCTGCTCTGGGAATGCACACTAGAGAATCTTAATG  
TTATTTCAAATTTCTGACTGCTTTTTTTTTCTCATTAGCACTTCACAAAA  
CGAGGCATTGGAATATGTGGAATATGTACATATTTTTTAAATGTCTAGC  
AAAGGATATTTTTTCTTTCTGTATTCCAATGGAGGAAAGGAAATTAGTTG  
ATTAATTTTCATATAGCTCATAACTGTCAAACATAGATATACCATTTATTG  
CTGTATCTCCTCATTTTTTATACAAAACACAACCTTTGAGCCCATAGATGT  
TGACGAGAATCATTTGCACTTAGATCTGTCTTTTAGTTTTCATATGCCAC  
TCCATATATAATGACTGAATCTAAAAATATAAGACAAAAGTAATGTCTTT  
TAGTATCTGTCTTTACCATGACTGTAAACATCCATTCAGATCTTTCCTTA  
AATATTTTATTTGAGAGGATGTGAGCATGAAGGGGGGGGGGAGACAGAGG  
GAGAGAGAGAAAAGTAGGCTCCCCACTGAACAGGGAGCCCGACACCAGGG  
CTTGACCCAGGACCCCAGGACCATGACCTGAGTCAAAGGCAGACCCGTAA  
CCAACTGAGCAACCCAGGTGCCCCCATCCATATAATCTTATATGACGCAA  
TTATAGTCACCAAAGCCTGGTATGACTATTTATTAACAATAAATCCAC  
TTTACCACAGTTTCTATTATACATTTCTGAAGGTTACAGCTGGGGCCAAC  
TAAAAATAGAGCTGAGGATTAGAACTACGTTATCAGATGGAAGACACTACG  
AAACCTCTTTGTGAAAATATCTGATTTGTCTGTCTTAGAGGCTGGCACTT  
ACCACTAATGACTTAGTTCTTCAGATTATAAATGGTGTTTTGTGTATATC  
ATGTTGAATTATTATGTATATTGTTTAGTGTATATTATAGTCGCTTGCCG  
TTATATCTTACATGAATATGTCCCCAAAACCTTATAGGAAGGCCATTTTT  
TTCATGGTCATCTTATTTCACTGCTGAGAAAATTGAGGCCACAGAGAAA  
CCCCCTCCCCGATAAAGTGTCTAAAAGCTAATACAGATAAACTGGGATT  
TATACCGAAACAGGCTCTTATTCCTAGGTTGTATAGATAAAATTTAAGG  
TACTGGTTTCCAGGGGCCCTCCGGGAAAGAATAAATATCAGTCAAAAAGAC  
AACTCCCTCAGTTTTTAGTTGTACTTAAATCCTTGTTATTTATTTATAGG  
CCTAGGAAATTGATACACCAGTTAGAATTACTTCTGTCAACTTCTCTAGC  
ATTGCCTTGGGAGACTGGGTCATAGTAAAAGAGTATATAATCGAGGGAAT  
GAAGAGGAGGAGGGATGGATCTCGAACAAAGATTGCTGTTTTGAAAGGGC  
AGTTTGGAATGGGGAGCCACACTAGTGGGTTCTTGGGACCAGGGTAGAA  
AAGCAGAAAGATAGCAGCCGTCTGTGACGTGGGGGTGGAATCTGGTGCA  
TAGAAAGAGAAAGCAATAAGGTGCCAAAGAATGATCTCCCTCTGGCCGG  
TCTTTTCCAACACTGTTTTAATTTCTCTCCCTAACACTGAAGCACCAGTG  
ACAGTGTGCTAATCTACTTTGAATTTTCAAATGGATTCAAATATGTTTGG  
AAGTCGAAAACCCTAGAAAAATGTGTTTTTTTTTTAAACATTTAATTTTGT  
AGATAACAATTTCTTTTGCTTACAAGATGGTAGAAGTTGGGCATACCA  
TGGTTAATATTTAGGTAACAAGAAGTTATCTGCTTAAGGGATTAGTTTC  
TAATCAAAATTCAAAATGTAAGTTCTATGGATTTTGTGTGCTCTTATTC  
AATATATATTTCTTTTATGAGCCATTTCTGTAATTCCTTTTGAGTTCCAGC  
ACTAGATGAGTCACACATTTTACTAAGTGTTTTTAATTTTCAACACACTG  
AATCCTTGATAGAAATTGAAAGTATGATTTTTTTTTTTCTCTTCTGTAATC  
AAAGAAAACCAAATTCAAAGGCTTTTCTAGAATAGGCTTTCATATCTCAG  
ATCATCACTTATCTACCTACTCAGCTCCAGTTCTGTTTTCTCCTCAAAACA  
TTATGATTGGGCAAGTCTGTAATAACTAGCTTTGTGAAGGGCGGAACCTT  
CTTTTGTCATGGGCCGATTACAATGTTTATGTAAATTGCTTCGAAGTTTGG  
CAGATCACTTTCTAGAGACAGGACTCTTCTGTTATTATTCCGCCAAAA  
TCTGCTCGACTCTCTGATCTTTGTATTATAAAAACAAAATGCCTTTACTG  
AATCCTGACATGTCATGAGCTTGACAGTACTAAATCGCTTCTCAAAAGCA  
GCAAAATGTTTCAGCCTGTCTTCTTAAAAAAGAAAAATAAATCTGTTCTA  
ATTTCTTAACCGCTGAAAAAGAGCAGAGCTCACATCAAGTGTGACTCATG  
ATAACAAATCCGACACTTCTCCCTCTCCTCCCTTGTCCCTTTAAAAATT

GATCATGTACTCAGTTGCCTTCTGACTCGTTCAAAGTATCCTAAAATTCT  
TGAGCAAGAGAGGAAGGAGTGTGGCTCAATTCTGGGTGATGATTCATT  
CAACCAACCACTCCAAGAATCGGGGAAGAATGTCCATAATTGTAAAGTAC  
GATGGTATTGCAATGTATATACCAGTCATCTCTCACCATTTATTTCTGTA  
TTACCAATTAGCTCTAAAATTAGCAACTGTTAGGAAAAAAGAAAAGAAG  
AACAGCCCCTCATTAGGTTTAGAGAACCAGTTACTGTTCTAAGCTCAGGT  
CTCTAGAAATGCAAATTTCTGTGGCAAATAGTTAAACCACCTTCCCTCC  
CTCCCCTTCTTCAGCTATTGTGTCCAGAAGTACTGACACCTGTTCAAACG  
GACAACTGCTTTTCTACTCCCAATCATGGAAGTGGTATGATGGTTTAGGA  
ATAAAACCATGGGTATGCCTCCCACAATTCTGGGATGGGTGGATGGTAAT  
TCTGATAGGTAACCAAAGCTACTTAAAAGGTCTGTCTTCTATTGCAAACA  
GGAATTGGTGTTTTATCTGACCTTTGATCAGAAAGTTGGGTATGGCACAT  
GAATATGCTCTTTCCATTTCAATATCAGATCGGCCACGCTTTTATTTTGA  
CATATAATTAATGCAATTTCCAATATTTAAAATTCAACTAATACTTACTGA  
GTTTTTACTGGATGCTAGTCCAAGGCTAGACCCTATTGACACATAGGGTC  
AATAAGGGTAAGTTAGACATGTTCTCAACTTAGTTTCCATGGATGACTCT  
TCCAAATCTACTGAATCCACCTAAGGGATTATAAGCAAGGAAAGGACTTC  
CTTTTTGGTGTGGAGGGAGGCATTTATCATGTCTAAAGGCACTTTTGGTT  
GTAATGACTGGTGAGGGGACGGTACTACTGTTTTTGAGGGGGTAGAGTCC  
AGGGATGCTGCTAAGCATCCTATGATACACAGGACAGCTCCCTATAACAA  
AGAATGATCTGGCTGGACAGGTCTGTAGAAATGAGGTTGAGAAAACCTGG  
CATAAAAGAACTCCGTAAACAAGGAGTGAGGTTTAGAAAAGAGTACCTGG  
CATTTCTCCAAATAAGTTGTTCTTTTAAAAGAATAAAACCTTATACTTCT  
TAGAAGACCAAAGAGAGGACAAGTTGGCTGGGATAGCTCTGAGTATAATT  
GAGAGGTCTTTGTGTGTAGAACAATTCTAAAGAATTTTATCCTCTTGTTT  
TTAGGGCCCACAATGGTTGCAGGTAAACATACTGGTCCCTTAGGATAACA  
ATAGCCACAACACCAACAATAACCCATATACAGCCCTTGGGAACCTGACC  
ACTGTTCTAAACATTTTTCATATTAAATTCACAGCTACACTATTGAAGTG  
GACACTATTATTCTGCATGTTTTAGAGATGACAAAACCTGAGTACAAGAGT  
GGTTAATTAGGTGGTCCTGTGGTCACTCAGCAGTATGTGGTAGAGCCTTG  
ATTGGAACCTAAGTGGCATGGATTGAGAGTCTTTGTTCTTAACTAGGAAC  
AACTAAACCACCTATTCCAATGTGAGCTGTCTACATTTTACTCATCTCAG  
CTACCCTCCAAGTATGTCTTGGGTCTTGGGACACATTGTTTTCTCCATGC  
TTCACGTTTATCACCTATAAGGCGGGTCTACTATTTGATTTGGGTGTGA  
TAGAGTATAAGTGAGTTAGTGTATGGAAGGCATTTAAACCMAAAAGAA  
AGTTCTCAAAAACCTTCACCATAATGATGACAATGATTCTTCTCTGGGG  
CACCTGCATTTTAGGATAGGCTGATGTTGTGTGGAAAGGGTACTGCAGTC  
CAGTAGAGTTGGTCTGCATCCTTTCACTGCTTGTAATTAGCTGTGGGACT  
TTGACCAAGTTAAGAAGCTCTTTGGGCCTTGTTTTTCCCTTTACAAAAC  
AAAACAAAACAAAACAAAACAAAGACAGTTGCTAAATGGAATAATCCTT  
TGGA AAAAATAAACGTAAATTTACTGAGGAAATGCATAGTTTCAAGTTTCT  
AAAAGAGAAATAAATGAACAGAAATGAAATTTTAAAACTGTGAGCCTGT  
GGGAAATCATAATTTTCATATTAGCTTTCTACGATCACCTGATCCCTGCT  
GTTCAAGTATATTTTCATCCTTTTGTA AAATCATATGTGTTAGGAGAAATT  
GCCTTCTGTGCTTAGGTAGCCAGCTTAAGTCACTAAGAAGTTTTGCACTC  
ATGGTAAATCTAGTGTGTGTGTGTGTGTGCGTGCATGCACACACATGTG  
TGCATGCATGCATGAATGTGTATGAACAGGCATGTGCACATGGAAAACCA  
AAGAGGACAAGGATTACAGCCTACTTTGTCTACTTGTCTACTTTGTTTGCA  
CCTGTAGGCACATACCCTCTTACCAGGTGATCTAGGAGAAGACATGATAG  
AAAAAGCTGTGGGCTGTGAAAACCTGGTTGTGAGGGATGGTTTGAGAGCA  
CATTAGCTACGAGAGCATATGGTCAGTATGGTTGGAACCAAGGAGTATAT  
AAACAGTATCCTTAGCTTTTTATTGATTAAATGTTGTCCATGACCTGGCA  
TTTTGTTCTGTCTTAAACAACCTGTTATTTTTTCACAATTCATTTCTCTTATA  
TACTATGTGTTTTGCTCTCTAAAGATATTTAAAGAAAACCTGTCTTTCTCT  
GAATATGTGTCTTAAAGCAAGTCCCTTCTAGGAAAGCAAACCTACTATTGG  
CTAAGATGGAACCTGTTTGACTTGGAATCCACATGGTACACAAAGGCAAGA  
TACCTGGGACGTCAATGACTAACCAACTCTTTTATAAATCAGTATTTT  
GGCAGTGAGGAGTGAAGGATAGGATACAGGGTCATGGCCTTCTTGGGTCA

TTAAGTGTTCCTTTGGATATGTTCACTGTTTCCAAAGAAATGACAATTTTA  
CTCAGATATAAGAGATCAGTAACTAGGAAAGTTAAGTTACAGGATCAGCT  
ATATGTTTTTTTTTAAAGAATGTATCTACTTATTTGAAAAAGAGAGAGCAT  
GAGAAGGGAAAGGGGCAGAGAAAGAATCTCAAGCAGGCCCTCACTGAGC  
AGGGAGCCTGACTCGGAGCTCAATCCTAGGACCCTGACATCATTGCCTGA  
TCCAAAGTCAGATGCTTAACCAACTGAGCCACCTAGGTGCCCCTGTATGT  
CATATTTTTTATTAATATTGATATATTCTGTTTTGATTAGAGGCTGGGATT  
TCTCAGTTTGATTTTTTTTTTTTTTTAATTCTTTCTTCTGCTGACACCTGG  
GTGGCTCAGTGGTTGAGCATCTGCCTTCCACTCAGGGTGTGATTCTGGGG  
TCCTGGGATCAAGTCCCTCATTGGGTTCACAGGGAGCCTGTTTCTCC  
CTCTACCTATGTCTCTGCCTCTCTCTGTCTGTGTTTCTCATGAATAAA  
TAAGTAAAATCTTAAAAAAAAAATCTTTATTCTGCCTTTTTTAGAAGACAC  
CTGATTAATTCTATTCCAGTGCCCAAAGTTTAAGGTAAATCCTTAAATCA  
GTTTTGTAGCATATTTTGTGAATGTTAGGGCAATGTAGCCATATTATTCT  
GCAGCTTCTAACTAAGGGGTTATGTAAATGAGTAGATCAGTATAATGCAA  
AAGAGGTCGTTGAACAATGAAGTCCTGGTTTTTCACAGTAGTGTTTTCTTT  
ATTTTACTATGCAGTCCTCTGCTTCTACTTCTGAACCTAGTCAGGAGTCC  
CAAAAGACATCAGATTTAAGAGGCACACTATCCATATAAGATGGCTTCTT  
GTGTCACATCATCCTTATGAGATGGGTCTTGTCTTCTCTAAACTCTAA  
TTATGATTGATTTTCTGTCTTTCTCCTCCAAGAGTCCCTCGGGATGAATGGC  
ATCCATCCCAACAGGCAGGAGATAACTGGGTCCCTCAGATATCCATCATG  
AACTGGATATGTATATGCCTCAATCTTCTTTCATTCCATTACCCTTCACT  
CTGACCTCTAGAAATTTCTGTTGCCTTTGGTTAAACTCCTGTATGTTAGT  
CTTTTCACTGAACATTTCTCTTATGTTTCTGTTTTAATGCGACCCTTAAC  
CTAAGTTTCCCAGAATCATCTAGAATATTTGTTAAAGCATGGATCGAGGG  
GCTCTACTCTCCAATCTCTGATCCATTAAGTCTGTGGTTGGGACCCAGAA  
TTTGCAATTTCCATCAAGTTTCTAGGTGGTGCTGATGTTTCTGGTTTGGGG  
AACATACTTTGAGAATCAGTCCTCAGACAGAAACTGGTGACCCCTGAAGA  
AATGATTTCCCTTATATTCTTTCAAGTGGTGACTGTTGTACCATTCACT  
CATCACATAACAATTATAACTTAAGATGATTTTGGTGTTTGCCTTGCTGCT  
CACAACAGCTGTTTCCCTACTATTTCTCTTCACTCCTTCCGGAATATCCC  
TACGAAGTCATCAGATGTTGACACCTGCAATGCTTCTTGTGGCAGTTTCT  
ACGGACCTCCCAGTCACTCCCCCTTCTCACTGAAAAATTTTATCATCTG  
GCCAACTATTGTTCTCTCTTTTATTATGCCTGCCAACATTCTTGGTGCT  
TTGCCATCTACGTACGTGATCCATGACCTTTCCTACTATTTCTCTATTGCCC  
CATCCACCTTACTTTTCTCATTTAGCTTAGATCCCAGACCCTCAAACACC  
AACTTCTCTTCGAGCAAAACCTTCTTATATTTTCCCTCCAAACCCTAAC  
CCTGCAAACTTAAACCCAACTTTGCCAATTCTGGGCCTGGACCCAAGAAT  
CCTTACACAGCTGGAAAAACAAAACAAAACAGAGAACCAAGCTGC  
CAGTTTCCACTTTAAATATACGATTAAGAAAAATTCAAATGGGCTTTCCA  
AATGATCACAGCACAAATCTCTGTTTTGGCAATCAGTAACTGGGTAGAAG  
TTGAGAAGGATGTTTCAAGTCTCAGACAAGAGGAAGAATCCAAGTTTGGA  
TTTTGGAGTCAAGCATATCTTAAGTCTGTACTTGTCTCTGATTTTTACCA  
GTTGAGTGTCTTGGAGCAAGACATTTTCCAAAGCTGTCTTTTACAGCTT  
TGTTGCATCTTCTAGAAAATGGGGGGAATAATAGCAGAAATTATAAACT  
TCAGGGGTTTTCTTATGAAGATTAAATTATATAAAGCATATCAAAGATTT  
AGCGTACATAGTGCCTGGTGACCAGGAAGCACTTGGTAAATATTAGCTAT  
CGTCAATGATGTTATTGAATTTATAACCCATCACTTAATTTTGACTAAGG  
CAGACACATCTTTGGATCATAAAGTGTCCACAAATGAAGATCTTTCTATG  
TTTCTTATTTTTTCAATACTGATTCTCTAAGTGACATTTGAGTGAGTGTA  
TGTGTGCATTGTCAACAATGGATCTAATCAGCTAATCCAAAGAATCAAG  
TCACTTGGTTGTCTCATAGATCTGAAGTCAAACCTTGACTCTCCTGAAATA  
ATCAAGTTGTAATCTATTGGCACATACATGAATGTCTTCTCCTGGAATAAT  
TAAATGTTTTTCCAAGTTTACCCATGCCCTTGTCTCCACCTCCTAACAGA  
GTGAAATGAAAACAGTTTAGAGGAGCTGTAATGTACAAGTAAGTCTTTGG  
TTATGAGGTAGTAATTCTGGTTTCTTAAACAACCATTAAAGTGATCCATTC  
ATGAGATGTGGTCAGTCATTATGGAGAGAGCTGACAACCACGTGCAGGGC  
TTTGTTTCCAGAACTCAGTCCATCATGACAAAATCAGATTATTTTTAAGT

CAATTAACAAATGACATAGAAAATGGGACAAGGGAGGGATTGAAGGGCAG  
CTAAGAGTGAACAGGGGTCTGGTAAAAATATTTTAAAAATTTATCGAGGG  
GTA AAAAGCAAATCAAGAAAACACTAAAGGCAAAACTACAAAGGGTCACC  
ATTGGGAAATTCCCATTAGTGATGGCAAGAGAAAGATGAAGAAGGTAATG  
ATTAGCAAGTCCATAGCCATTATCACTAATGGCTGTTCTCCCATCTGTCC  
CCAATGCCACGAAACCATAAATATCTAATTATACTAAGTTTAAATGTCTTG  
ATAAAAAGCGCTTGTTTATTCCCTTAGTACTTTCAGAGAGCAAATATTTTA  
TTTGAGCAAAGGTTATTATGAAATTGAGATCACTATGGATAGTTTGTTA  
GGCAGCAGATTTTCTCCTCAGCAACAGATCCTTTAAAAGAAAACCATTAC  
CAGCTGAAAGATTTAATGTAATTTAAAATATCACCATATTATAATTTATA  
GATATAATGTGAAATTCCTACAATATACAAATGCCTCCTCTGGTTTTGAA  
ACAAAAAGGAAAATAAAACCCCCAAGAAGAAATAGATGGGCAAATAAGAG  
GAAAGCCAGTGAGCAAACTCTTGATTTCAGAACAAACCATTTTTTAAAGGA  
TTGGTTGGTTGATTGATTGATTGATTGATTGATTGATTGATTGATTGATTG  
AGAGAGAGAGAGAACAAGCAGAAAGCAGCAGAAAGAGAGGGAGAAGCAGG  
CTCCCCACTGAGCAGGAAGCCCTATGTGGGGCTCGATCCCAAGACCCCCAA  
TCATGACTGAAGCCAAAGGCAGACACCTAACCAACTGAGCCATGCAGAGA  
CCCCCAGAATAAACCATTTTTAGGGATACTGTGAAATAAGATAAATGGTT  
ACCAAGAAATAAAAAGAAATTTGTGAACATAATTTTCATAACTGTAAAT  
CATTGCTATACATGTAAACACATTTATTTTGTTCATAGATGTTTAAAAAAA  
TTAAGTGTCTAAGTATATCGAATCAATGTAAAACCAGCAAGAGCAAGTC  
TACTGGTACCTTTGAAGCAAATTCATATATTCTAGGATTGTTGTAAGGCT  
AAGATAATGTATGGGACTACAACATTGCTTAGTATAAAATAAAATGTTCCA  
TAAATGTCAATTAATAAAGAATAATGATCACCATCTCTGTGTCCATGATTA  
TTATATACTGTGAAAAGTCCATGTGTCTGGCTTATCAAATAAACCAAAC  
AATTACCAGCTTTTAAATTCCTTTTTTTTTTTTTTGAGAAGTAAAACCTTT  
TATTCATGATGACATGATCCCATATATAAAATTCCTAAGTAATCTATTT  
AAAAATTACACTAATTAATTGTTTGGCAAGGTTGCAAGATATAATATTGA  
TAGACAAAATCAACAGTACATCTTATATGACAGCAGAGTAATCTGAAGTG  
ACATTAAGAAAATAATTCCATTACAAGAGCATGGAAATTAATAAAATAC  
TTAGGACAAACTTAACAAAAAATGTAAAACCTGAACAATAAAAACCTACAA  
AACATTTCTGAGAGAAATTAAAGAAAATCTAAATAAATGGAGAGGTACTG  
GATTAGAAGATTCATCTATCACTTATGTGGCAATTCTCCCTAAATTGATCT  
AGAGATTCAATGCTAACCTTATCAAAATCCTGGCAGGCGCTTTTTTTTTTT  
TTTTAATTTATTTTTTATTGGTGTTCAATTTACTAACATACAGAATAACC  
CCCAGTGCCCGTCACCCATTCACTCCCACCCCCCGCCCTCCTCCTCTTCC  
ACCACCCCTAGTTCGTTTCCCAGAGTTAGCAGTCTTTACGTTCTGTCTCC  
CTTTCTGATATTTCCCACACATTTCTTCCCCCTTCCCTTATATTCCCTTT  
CACTATTATTTATATTCCCCAAATGAATGAGAACATATAATGTTTGTCTT  
TCTCCGACTGGCTTACTTCACTCAGCATAATACCCTCCAGTTCCATCCAC  
GTTGAAGCAAATGGTGGGTATTTGTCATTTCTAATAGCTGAGTAATATTC  
CATTGTATACATAAACAACATCTTCTTTATCCATTCATCTTTCGTTGGAC  
ACCGAGGCTCCTTCCACAGTTTGGCTATGGTGGCCATTGCTGCTAGAAAC  
ATCGGGGTGCAGGTGTCCCGCGTTTCATTGCATTTGTATCTTTGGGGTA  
AATCCCCAACAGTGCAATTGCTGGGTCATAGGGCAGGTATATTTTAACT  
GATTGAGGAACCTCCACACAGTTTTCCAGAGTGGCTGCACCAGTTACAT  
TCCCACCAACAGTATGAGGGTTCCCTTTTCTCCACATCCTCTCCAACA  
TTTGTTGTTTCTGCTGCTTGTAAATTTTCCCATTCTCCCTGGTGTGAGGT  
GGTATCTCATTTGTGGTTTTGATTTGTATTTCCCTGATGGCAAGTGATGCA  
GAGCATTTTCTCATGTGCATGTTGGCCATGTCTATGTCTTCTCTGTGAG  
ATTTCTGTTTCATGTCTTTTGCCCATTTTCATGATTGGATTGTTTGTCTT  
TGGTGTTGAGTTAATAAGTTCTTTATAGATCTTGAAAAC TAGCCCTTTA  
TCTGATATGTCAATTGCAAAATATCTTCTCCCATTCGTAGGTTGTCTTTG  
AGTTTGTGTTGACTGTATCCTTTGCTGTGCAAAAGCTTCTTATCTTGATGA  
AGTCCCAATAGTTCAATTTTTGCTTTTGTCTTTTGCCTTCGTGGATGTA  
TCTTGCAAGAAGTTACTATGGCTGAGTTCAAAAAGGGTGTTGCCTGTGTT  
CTTCTCTAGGATTTTGATGGAATCTTGTCTCACATTTAGATCTTTCATCC  
ATTTTGAGTTTATCTTTGTGTATGGTGAAAGAGAGTGGTCTAGTTTCATT

CTTCTGCATGTGGATGTCCAATTTTCCCAGCACCATTTATTGAAGAGACT  
GTCTTTCTTCCAATGGATAGTCTTTCCTCCTTTATCGAATATTAGTTGAC  
CATAAAGTTCAGGGTCCACTTCTGGATTCTCTATTCTGTTCCACTGATCT  
ATGTGTCTGTTTTTGTGCCAGTACCACACTGTCTTGATGACCACAGCTTT  
GTAGTACAACCTGAAATCTGGCATTGTGATGCCCCAGATAGGGTTTTCT  
TTTTTAAAATTCCCCTGGCTATTTCGGGGTCTTTTCTGATTCCACACAAAT  
CTTAAAATAATTTGTTCTAACTCTCTGAAGAAAGTCCATGGTATTTTGAT  
AGGGATTGCATTAAACGTGTCTATTGCCCTGGGTAACATTGACATTTTCA  
CAATATTAATTCTGCCAATCCATGAGCATGGAATATTTTCCATCTCTTT  
GTGTCTTCCTCAATTTCTTTTCAGAAGTGTTCTATAGTTTTGAGGGTATAG  
ATCCTTTACATCTTTGGTGAGGTTTATTCTAGGTATCTTATGCTTTGGG  
TGCAATTGTAAATGGGATTGACTCCTTAATTTCTCTTTCTTCAGTCTCAT  
TGTTAGTGTATAGAAATGCCACTGACTTCTGGGCATTGATTTTGTATCCT  
GCCACGCTACCGAATTGCTGTATGAGTTCTAGCAATCTTGGGGTGGAGAC  
TTTTGGGTTTTCTATGTAGAGTATCATGTAATCGGCGAAGAGGGAGAGTT  
TGACTTCTTCTTTGCCAATTTGAATGCCTTTAATGTCTTTTTGTTGTCTG  
ATTGCTGAGGGCTAGGACTTCCAGTACTATGTTGAACAGCAGTGGTGAGAG  
TGGACATCCCTGTCTTGTTCCCTGATCTTAGGGGAAAGGCTCCCAGTGCTT  
CCCCATTGAGAATGATATTTGCTGTGGGCTTTTCATAGATGGCTTTTAAG  
ATGTCAAGGAATGTTCCCTCTATCCCTACACTCTGAAGAGTTTTGATCAG  
GAATGGATGCTGTATTTTGTCAAATGCTTTCTCTGCATCCAATGAGAGGA  
TCATATGGTTCTTGTTTTTCTCTTGCTGATATGATGAATCACATTGATT  
GTTTTACGGGTGTTGAACCAGCCTTGTTGTCCCAGGGATAAATCCTACTTG  
GTCATGGTGAATAATTTTTTAAATGTACTGTTGGATCCTATCGGCCAGTA  
TCTTGTTGAGAATTTTTGCATCCATGTTTCATCAGGGATATTGGTCTGTAA  
TTCTCCTTTTTGGTGGGGTCTTTGTCTGGTTTTTGAATTAAGGTGATGCT  
GGCCTCATAGAACGATTTGGAAGCACTCCATCTCTTTCTATCTTTCCAAA  
CAGCTTTAGGAGAATAGGTATGGTTTTCTTCTTTAAACGTTTGATAAAATT  
CCCCTGGGAAGCCATCTGGCCCTGGACTCTTGTGTCTTGGGAGGTTTTTG  
ATGACTGCTTCAATTTCTTCTCTGGTTATTGGCCTGTTTCAGGTTTTCTAT  
TTCTTCCGTGTTCCAGTTTTGGTAGTTTGTGGCTTTCCAGGAATGCGTCCA  
TTTCTTCCAGATTGCCTAATTTATTGGCGTATAGCTGTTCAATATGTT  
TTTAAATCGTTTGTATTTCTTGGTGTGGTAGTGATCTCTCCTTTCTC  
ATTCATGATTTTATTAATTTGAGTCTTCTCTCTCTCTTTTTTAATAAGGC  
TGGCTAATGGTTTATCTATCTTGTTAATTCTTTCAAAGAACCAACTCCTG  
GTTCTGTTGATCTGTTCCACAGTTCTTCTGGTCTCGATTTTCGTTGAGTTC  
TGCTCGAATCTTTATTAACCTCCCTTCTCTCTTGGGTGTAGGATCTATTT  
GCTGTTTTTTCTCTAGCTCCTTTATGTGTAAGGTTAGCTTTTGTATTTGA  
GTTCTTTCCAGTTTTTTGAATGGATGCTTGTATTGCGATGTATTTCCCCCT  
TAGGACTGCTTTTGTCTGCATCCCAAAGATTTTGAACGGTTGTATCTTCAT  
TCTCATTAGTTTCCATGAATCTTTTTAATTCTTCTTAAATTTCTTGGTTG  
ACCCTTTTATCTTTTAGCAGGATGGTCCTTAACCTCCATGTGTTTGAGGT  
CCTTCCAAGCTTCTTGTGTGATTTAGTTCTAATATCAAGGCATTATGGT  
CTGAGAATATGCAGGGGACAATCCCAATCTTTTGGTATCGGTTTCAGACCC  
GATTTGTGACCCAATATGTGGTCTATTCTGGAGAAAGTCCATGTGCGCT  
TGAGAAGAATGTGTATTCAGTTGAGTTTGGATGTAAAGTTCTGTAGATAT  
CTGTGAAATCCATCTGGTCCAGTGATCATTTAAAGCTCTCGTTTCTTTG  
GAGATGTTGTGCTTAGAAGACCTATCGAGTATAGAAAGAGCTAGATTGAA  
GTCACCAAGTATAAGTGTATTATCTAAGTATTTCTTCACTTTGGTTA  
ATAATTGATATATTTGGCAGCTCCACATTTCGGAGCATATATATTGAGGA  
TTGTTAAGTCCTCTTGTTGAATAGATCCTTGAAGTATGATATAGTGTCCC  
TCTTCATCTCTCACTACAGTCTTTGGAGTAAATTTTAGTTTATCTGATAT  
AAGGATGGCTACCCCTGCTTTCTTTTGGAGGACCATTGCAATGGTAAATGG  
TTCTCCAACCTTTTTATTTTTCAGGCTGTAGGTGTCTTCTGTCTAAAATGA  
GTCTCTTGTAGACAGCAAATAGATGGGTCTGCTTTTTTTATCCAGTCTGA  
AACCCTGCGCCTTTTGATGGGGTCATTAAGCCCGTTTCACATTCAGAGTTA  
CTATTGAGAGATATGAGTTTAGTGTATCATGATATCTATTCAGTCTTTG  
TATTTGTGGACTGTTCCACTGAACTTCTTCTTAAAGGGGAATTTTAAGAG

TCCCCCTTAAATTTCTTGCAGAGCTGGTTTGGAGGTCCCATATTCTTTT  
AGTTGCTGCCTGTCTTGGAAGCTCTTTATCTCTCCTTCCATTTTGAATGA  
GAGCCTTGCTGGATAAAGTATTCTTGGTTGCATGTTCTTCTCATTTAGGA  
CCCTGAATATATCCTGCCAGCCCTTTCTGGCCTGCCAGGTCTCTGTGGAG  
AGGTCTGCTGTTACCCTAATACTCCTACCCATAAAAGTCAGGGATTTCTT  
GTCTCTTGCTGCTTTAAGGATCTTCTCTTTATCTTTGGAATTTGCAAGCT  
TCACTATTAAATGTCGAGGTGTTGAACGGTTTTTATTGATTTTAGGGGGG  
GGATCTCTCTATTTCTGGATCTGAATGCCTGTTTCCCTTCCCAGATTAG  
GAAAGTTTTTCAGCTAGAATTTGTTCAAATACATATTCTGGCCCTCTGTCC  
CTTTCGGCGCCCTCGGGAACCCCAATTAAACGTAGGTTTTTCTTTCTCAG  
GCTGTGCTTTATTTCCCTTAATCTATCCTCATGGTCTTTTAATTGTTTGT  
CTCTTTTTTCCCTCAGTTTTCCCTCTTTGCTATCAACTTGTCTTCTATGTCA  
CTCACTCGTTCTTCCACCTCGTTAACCCCTCGTCGTTAGGACTTCTAGTTT  
GGATTGCATCTCATTCAATTGATTTTTAATTTCTGCCTGATTAGCTCTAA  
ATTCTGCAGTCATGAAGTCTCTTGAGTCCTTTATACTTTTTTCTAGAGCC  
ACCAGTAGCTGTATAATAGTGCTTCTGAATTGGCTTTCTGACATTGAATT  
GTAATCCAGATTTTGTAACTCTGTGGGAGAGAGGACTGTTTCTGATTCTT  
TCTTTTGAGGTGAGGTTTTCTTCTAGTCATTTTGCTCAGTGCAGAGTGG  
CCAAAAGCAAGTTGTATTGGGAATAAGAGAAAAAGAGAGGAAAGAAAGAA  
GGAAAAGAAAGAGAAAGAGAAAAAAAAGGGAAGAAAAAAATCGAAAAAA  
AAAAAAGAGAGACGAAAAAGAGAAAGAAAAAGAAAGGAGAAAAAAAAGGG  
GGTGGGGGAAGGAAACAAATCAAAAATCAAAACAAAACAAAAA  
AAAAAAAAGAAAAAGAACCACCGGGGAGTATCTTCTGATTCTGTGTACT  
TTAAGTCCCTTGGCTTCTCCTGGAAGTTGTCCGTCTAGCTGGTGTCTGG  
GGGAGGGGCCTGTTGTGCTGATTTTCAGGTGTTAGCAGTTGGGGGAGCTG  
CTGTGCCCTGCCTGGTGCAGGGCTCGGTGGGGGTGTTACCCCCGTGAG  
GCCGCAGGAGGAACAGCCCCAGTGGCGGGGCAGCTCTGGAAACCTGGATT  
CAGCTCCGGCAGGAACCTCCGTCTGCAGGGCCTGGAGGCTCCGGGGCGGGG  
CCGCTGATCTGCTCAGCTGGGGCAGGAGCGTCCTCGCTGTCCTGGGCCCT  
CCCGGCTCTGCCTGTCCCGGGGAGGCGGGATCCTGGGCTGTGTCCCGG  
CGCCCTGTGCTCCGGAGCCTGCGCTGTTGGATTGCGCTCCCGGGCCGCA  
GCCCCCTCCGCGGAGCTGCCGCCGAGCCCCCTCCAAGCTGCTCGTGGAAC  
CGCGCAGCCCCCTCTGCACGGAGCCTCTTCTCTGCCCCGAGCCCCCTCCGA  
GCTGCTCCGGTCCCGCCGGGTCCCCCGTGC GCGCTGCAGCCCTTAGGGAG  
CTCGGCGCATCTCCCGCGGTGCAGGTGTCTGTTACTGTCCCCGGGAGCCC  
GAGGGCATCCCCGCCCTCCTGGGTCTGCTCCAACCTCCCCGCGATCCCCCT  
TTCCCCCGGAAGGTGCGTGCAGCTCCTGCTCCTCCGGGACGGGGCTCTC  
CTGTCTGGGGACACTCGCCCCGGCCTCAGCCCGGCTCCTCGCGGGCCCC  
TCCCCCTCGGAGGCCTTTGTTTCTTTACTTCTTTTTCCCCGTCTTCCTAC  
CTTGATAGATGCGCGAACTCTTCTCACTGTAGCATTCCAGCTGGTCTCTC  
TTTAATTCTCAGGCCGAATTCATAGATTTTCAGGATGATTGGAAGGTTTT  
CTAGGTAATTTGGTGGAGACAGGTGATTTGGAGACCCTGCTCTTCCGCCG  
TCTTGCTCCTCCCCCAGCTTTTAAAATTCATGAGAGTATGTTTTCTTT  
AGCTATGATACTTTTAAAAATTAAAGAGAGTTAAGGAAGGACTGGTGCAG  
TAGAAGTAAATCATTTACAGACTTTTTACAGGTGAGAAATAAATAAGCA  
GGAAAAAAGAAAAAGCAGGTTATACTGCCAACAGGTACTATTTACAATA  
CCGTTCTCAGTATTTTGAGCAATACTTGACGGGATGTGAAATACGTTGA  
GATTCACCACCAATTGTTTTTTTAAAGTAAAGTCTGATTTTCCAATTGTAG  
TATCAACTACAATTTAGAAAAATCGTACAAATCACAAGTAGGCAGTTTAA  
TGAAATTTTACAAGATGAAGCCATGAAACCATGACCTGGATCAAATGTT  
AAGCCTGGAAATCTCTCTGATTGCCTTTCTATAATTTCTTCTACCCATA  
GATAGCCACTATATTAATTTGTAGCTCATAAATTAATTTGCTTGTCTTT  
AAAAAAAATCTTCAGATGAAATATTTTGGGTGAGACATCTTTTCTCAACG  
TTGTTTATAACACTTTATCATAGATTTTTTCATATCCATTGTGATAAGGTA  
TTTTCAATACATTTCTAGTTGGAGTATTTTATATCTTTGCTATTTTATTG  
CTAATTTGTATATTTACCATGTTTTCTCTTTTTCTTTGGAATGATCAAAT  
ACTTTTTTTTTGTTCTCTATTAGCTTATTACTTGTACAATATGTTATTAAT  
CTACTAACATTCAGAGTGCAACATGCCTCTCTAACTATGAGTAAGTGCTT

TTCTAAGTGCATAAAGCAAGGACTCCAGAATACTAACTCCATTTGCTCCC  
CCTTCCGTTTTTTTCTTATACTCTGTCATGTTTTTATTTCAAGTATATT  
TGAACCTCTAAATAGCATTGCTAAAGTATTTAGACTTATTCATGTAATTA  
CTCTTTTGCTCTGTTTAGTGTTTCCAGCTAGATTATGTTCTTTCAAAGAA  
CATAAGAATGTCCCTAATATTTACTTTAATGTTGATGGTAAGTTATCTTG  
GTATTTGTTGAAAATGTATTTACTTCACCTTCCTTTTTGAAAAAGTTTGC  
TCAACACAGAATTAGAGGTTAACTTTTTCTGGAAAGGGTCTTTTGAATACT  
ATCTTTTCCATTGAAAAGTAAGATATCAAATTAATGTATTTTTGCTGAAG  
GGTATTTTGTCCAGGTCTCTAGGTGATTTTAAAGTTTTGTCTTCAAATTT  
TTTTCAGCAGTTTTTATGATTAAAAAACTGATAGAAGTGTAAATGTTTT  
TTCTTGTTTGGGGTTTTGTTAAATGTTTGAATCTGTGTGTACTAATCATTT  
TTGAAAAGCGTTGATCAATATTCCTTCAAATATTGCTTCTGACCTTGTT  
ATTCATGGAATCAAATTACATATATTTTTAGTACTTTCTACCATGTTCCCT  
GGATCTTCTATCTCCTTTTTCAGTATGTCTTTCTGGGTTTTAGTCTGATGT  
TTTACATACCTTATAAATTGAATCCTCCTCTCTCCTGTTCTATCTTATCTA  
AAATCTGTTGAGTTCCTTAATTTCACTTTCATTTTTTTTTCTTCTTCAGGT  
CAGGGCCTTCCATTTGATTTTTTCAAATAAGCTCCATCTCTTTTTTGAAT  
TGTCTAGTTTTCTGAATATATTATCATTAATTTTCTATCTGAAAACCCCA  
ATGATGGATCACCTCCAAATCTATATCTATTTTTCTGAGATTTTATTTTAT  
GATCCTATTTTATGGCATATCTCTTGACTTTTTTTTATTGGATATTGGCTA  
TTGTATATGAACAATTATTGAGGCTTTGGAAGATACTTTTTAAAAAGAT  
TTCATTCATTTATTTGTTTATTGAGATAGAATATACAAGCAGAAGGGATG  
GGGTAGAGGTGGAGGGAAAGAGAATCTGAAGCAGACTCCAGGCTGAGCAC  
AGAGCTGGACATGGGGCTCAACCCACCACCTCGAGATCATGACCTGTGC  
TGAAATCAAGAGTCGGGCACTTAAGCAACCGATCTACCCAGGGGCTAGAT  
ATTATCTTTCTACAGAAAATATTTAATTTTCTCATTGGAGCCTAAGATGT  
AGCATTCATGAGAACTGAGTTGGTCTATTTCCAGAGCATTCATTCTCCTG  
TTGTGCAGACCTTGAGGGGTCTCTGATAAAGCCTGGTCTAAACCCAAATT  
GTTATCTCTTTATGCCATGAGAATGCTAATAGCTTGCTGCTATATAGCTG  
AGCCTGCCATTTTATGCTTGATTTCTCAGGCTCTTTCCCTGCACACCTTT  
TGTATTAGCAAATGTCTACGGAGAATATTGATGCATAATGTGAAATTCTG  
ATCTCTATGTGCCCTTTCTCTGCCTTCTCAAGTCCTTGCTGCCTTGGTAG  
TTCTGAGTTCAGTCTTTGGCTTTTATTTTAATACTAGTAAAAGTTCTAA  
GTCACTCTTGTTTTTCTCTTTGCCCCCTCAGCTGTGTATGGATAAGCCTG  
AGATAGAAAAGTGGCCAAGAATGTCTGATTCACTTCGGTGCATGTTCTCT  
CACAGCATCTTGAATCTTCAGGTTCTTTCTGATTTTTTTTTTTCTCCTTG  
AAACCTTAAAGATTTTCTGTTGTTGTGAAATATTGTATAGTTTTTGTAGT  
GGTCATCAGTGAAGGGTTTTGTTGATGCAAATCATCCCATTCACCTGA  
CTTTGATCTCTGAATAAGAATAATTTTGCTATCTGAATACACATGCTAAA  
GGGCAATGTCTTTTATATTGAGAAGCAAGCATAACATTGAGTCTGGACAA  
AGGAAAAGCACAAAGGCACATAAGAGTTGTGAATCCTGAATGTTTAAAAG  
AATGGCATTAGTGTGAATAATAGTTTTTACTCAAAAAAAGGTGTAGTGCCC  
AAGGAAAACCTATGTGAAACATGTGAACTGTTAAAGACCTGAGGAATGTT  
AGTGTGTAGCAGCAACTGCTATAAATATGGCTAAGTAGTAGTCTCCATC  
TTCAATGACTTTGTGTCAAGAAAACTCAGCTGTTCAAAAGAGCACCATG  
GAAAATTAGTATGCAAGAATGAGTATCTGTTTTAAATCAATGTCATAATG  
TGGAAGAGTATATATGATAAAGGAAATCTCAGGTATCTAAAGAGACAAAG  
ATTTTACATAGCATTCTAGGAAAATTCATTGGGAGGGACAAAATAAGTG  
GAGATATTTTATCATACACTGAGATAAAGTTAAATGATGGATAAGATCT  
CTGAACCTTAAATAATTTTCTTAAATTCTAAATGTCTATCAAAGTACCA  
CAACAAAGATGAATTTGTATGCTAAAAGAATGAATCATCTGAAATGGCAA  
ATAAATGAAAAATTTTTTGTATATATAGGGCAATAAGAAATTTTCACAA  
TAAATGTGGAGCTCATACAAACAATGAATAGAAACATTCAGTGGATAATA  
AGATGAAGGTCGTAAGAGATTCATTCTCTGTAGAGAGATCTAATCACTGT  
AAAAATGAGTTTTTAGGAAGGTATTTAATAAATGGCATTTAGCTAATAAAA  
CATCACAACTCTACTCTCAAATTAGTAAAAATCTAGAAAGATAAAAAATTA  
TTAACAACTATTTCATGAGTGTATGATGAGATACAAAATAGGCACTCTTGG  
GATGCCTGGGTAGCTCAGTGGTTGAGTATCTGCCTTCAGCTCAGGGCGAG

ATCCCAGGGCCCCAGGGATCAAGTCCCACATTGGGCTCCCCAAGGAGCCTG  
CTTCTCCCTCTGCCTATATCTCTTCCTCTCTCTATGTCTCTCATGAATAA  
ATAAATAAAATCTTAAAGACAAAAAATAAGGCACTCTTACAGCAAA  
AAGCATATAAATATACCCAATGGCATAGTAAAGAAATGTTCAAGTGTAGG  
TAAAGAAAAAATAACAATGATTAAATAAACACGTAGCCTAAATAATGTA  
ATATTGTTCTTGTAATGGTGGCTATTAAGATTATGTTATACAATAATATC  
TATGTTATTATAGTAAAGCAGAGTGTAAATCTGTAATTACAGTATCCAA  
TTGTATAAAATTTGCAGAGGTAAAAATTAACGGAGGCAACCTGAAATAAT  
ACCAGTTGTTTTCTTGATCATAAATATTATTTTAAACCTCTTATATAT  
TTTTGGTTATTTACGTATTTTCCATATTAATTATATTTAAAAATCAATGT  
TTTGACAGCATTTTTTCCCAACAACAGCATACCCATTATCCAGAATAATA  
CTACATCTTAATGCTCATACCCAGACATATGTGAAGACTGCCCTCTGAGT  
TCTCCTGATGAACACAGTTAGGATTCTCTGCCTCATAGAATGGATCTGAT  
TTAGTATGCCCATTTTTCTGAGTCCTTTCTTCCCTCCAATGCATTGCTGA  
GCTTCCAGGGGGCTTTCTCAGCTGTCTATCAAACTAGCTACACTGGTTT  
CCAAGGCCCTTGCCAAGGCATTAGATCCTGAATCGTGGGAGTACATCCTA  
TCCACAACTCTCTCCCAATCAGTTTTATATTGTACCTTTCTTCTTCTAT  
GGGGCATGCTTGGGTAGCTTCCAGACCTGTTCTCCCATTTTGAGCTGTA  
GGTATTAGTAGACAGTGAAGCTCAGTTTGTGTAATCCCCCTCCTTGCTTAG  
CAGGACCCACATTTTCCAATCAGGCCATGCCTATGTTTGGCCCTAACTAG  
ACAGGTCCTGTTACCAGAGGAGAGGGAGTGTGGGTAAATCTTGAGGGGAG  
CAGGCATTGACATTCAAGGCATGAGGTCTCTGCTTCAGCTTCAGGTGAGT  
GGATGGTCGTCTTTAGCAAAAGGAAGGGAGCCAGCAGTCCCCTGAGGATCT  
GGGATTCAGATGCTGGCATGCAATGTGATTGAGGGCATCTACCTAGGTAG  
CCCATCCCAAATTTTCAAGATCCTGTTTCTTTGCTGTGGGAACTTGTTA  
GCCTGGCTAGAGCATGTTTCAATTTTTCTTTCTTCTTAAATAAATCCTTGA  
TCCAGCCTTTGGCTTCATCTGCTTCTCAGCTACAAAAAGGACGGCTTCTT  
TTAATACTGATATAGAGGTTTTTTGACTTTCATACCAGGCTGTAAGTTGG  
TAATTGGCTAACCTGAGCTTGACATTTTTTTCCCTCAATGCCTTAATAG  
GATTTAGCAACATACAACAAATTTCACTGTCCTTATAATTATTGACCCTT  
TCTCCATACTTCCTAAATGATCAAAATATTGTAAAAAACCAGTACAATGA  
AAACTCATTTTTATGTGAATATAACGTTTTTATGAAAACCTGTATTTTCCA  
AACAGTGAAAAGAGAAGCATGTGTTTACCTCCCACCCCCCACAATCTC  
TGTAATGTTTGACTTAATTGAAAACATCTGTATTCTTATACTACTTCTAT  
GGTCAATCTGTTGTGATATATTTGGGTAAAAATATATGAAGAAAATCACA  
CTATGTGATCAGAAAGGGGAGAATAATTTAATAGCCCTTTGAGATAATT  
AGGAATATGATTTGATCTCATACCAGTATTTAGCAAGTCGTAATTTCTCA  
AAAGTTATTTATAACATAAAGGCTGAAACCCTGTCAATGAACATTTTATG  
TTCTGTAATGTTAAATCCATTGTCTATCCTGCCCCCTCAAATGTATCTTT  
TACTTTTGCATAGTTTTCTAGCATCTTGCTTGATCATTGGAATAATTG  
GTTACAGCATTACACAGGCCTTCTAAATATTGACACATTTTATTTTATA  
ACATAAAAGCATTGTTAATGTCATCAAAATCCATAAGCGTCTTAATATT  
GTTAAGCTGCAAACTCACAGTGGCCAATATAAGGTTTCCAAAATTCAGT  
TTTCTCATGAAAGCTCAAATTTTACCCTGGCAGCAAAATACTGCCAATTT  
AATTCCTTAAGCTGACAGGCTTACTTTGTTTCAATTTTCAAAAAAAAAAAAA  
AAAATCCAAATACCAAAGTCTGAATAACCATAGTTGTCTGTCAATTGTTT  
TTTCAAGTAAAAATAGTGTTCCTGAGAAAAGAAGTTAGTTTCAAGCTCATC  
ACTCAAACAATTGCATAAGCATAAGACAACAGTGCTTTGGTAGACCACTG  
AAGTGTTTTAGGATGGTTTTCTGTTCCATTACACAAAATAATTAAAAATA  
CGTATGTTGACTGCTGAGAAATTAATAAAATTAACAAATTTTACTGCTTC  
CTCCAGGATGTTCTTAAGTGAAACTCTCATAAACTGTCATTTTTTTTAATG  
CATGTGCATGTACGGTCGTGAAAATATAATGGCTCCAAGTACAGTTGAGT  
TCCTCAGTACAAATTAGGCAGAGGCATCAGCAGCTTTACCCCCCTTGAT  
TTTTCCACCATGGGTGGAAAACAAATAACATCTTAGTGTTGTCATGAAAA  
TATTTGAGTCTCTTGACCTCATGAAAGAGTCTTAGAAATGCCAGGAGT  
CTGCAAACCAAATTTGAGAACTGCTATAATAAATTAATTAAGTTCCATAC  
TAATATCCCTATTTAAAGATGTACTTCTCCAATAAGTGTTTCATCACGCA  
CTCACACTCACACACACACGTGCACACATATGGATACCAGGAACTCTGG

GAGGTATTGGATATGTCTATGACCTTGACTTTTGTGATGGTATCACAGGT  
CTTTGCAAATGTCCAAATTCATCCAAGTATATGCATTAGAAAGTATGGTT  
CATTTTATATCAATAGCTTAAAGTGATAAAAAAACAAGATTTTAAACCA  
GGACGTCTGATATTACTGTCTATACTATTAAGTATTGTACTATATACTA  
GAGTAGAACCAAGGGTTTCAAGACTGAGTTAGGGAGCTGTGTATCTCAGG  
TACAGGTCATGGCCTGTAACCTCAAAGTTACTGCAGATAATCATAAGGG  
ACTTGGCATAGAAGAAAAATATGAGTTAATTGCTGAAATAATGAAAGAAG  
GTGGAATGTATCTTGGGGCCTGGTGCTTCATAATAATCAAATGGTTAAA  
GACTATTTTAAACAGCTGCTGTAGACTTCACAAGAGGAAAGATGATTGGGT  
TAGAGCACTGAAATAATTATAAGTAGGAATAAGGCCTGAGCAGACCTTTT  
CTCTCCCCAGGAGATGGGGAAAAATAATGACTTCATTGGAGAGGGTAATAC  
AGGTTTTCTTTGGAGAGGCACATTCAGGTATCATTTAAAGTGAAAGAGT  
TGTTTTCTCTGCAAAAAAGGTCTGGACAAAGGATTTGCCCAAAC TAGAAC  
AGGATATAAATGACAGTAACACAGTATATTGCACAAATGACATGTATATA  
TCTCCATCTCAGAATACTTGGAGTGTTTAGTGGGAGGTTTTGGGTAAAGA  
GCAATAAGCAGAAAAATATTTAACCTCAAGGAAGAGAACCTAAGAATTTT  
GGTATCTTAAATGTGTGTTTCTGAGACTAAACAGCTGATAAACCAATTC  
TCTTAATTATATACAACTAGCTCATAATTATATACCCACCAAATCCCAG  
GTAAACTTGATAGACCTTTTGGCTTATGGAGGTATATTACACAGAGGTTT  
TGCCTTTTTAAAAAACAACCAACCCCATGACTTAAAAAAAAAAGTT  
TGAAAATTTCCAATGATCTCCTTGTTCCCTCATTTATTTTCCACAATCTG  
TGTCTAAACTCAGTTATCAATTTACCATTTAATGATATGGTCACTTAAAT  
GTATCCTGACCCTGACAAACAGACCTTCATTTCAAGCTTGTGTTACACAT  
AGTTTCCGATGACTTTTTTTTTTCCCTTGCCCTAATGTTTCCAATACTGAA  
ATTTTGGCGCCCTGTAGACTCCAGTGTTACGAGATTACCTACACTAGTGGG  
ATGCTTTTCCCAGATTTATCTTCTTAAAAATTCCATTTGCATTGTATAA  
TTCCAGTTGAAAACCTACAACAATGTCCATTTCTTAACTTTAAGACTTTA  
AGTTTTCCTTGCGCTTTTAAATATTGGCCATAATTTTGCCCTGAAAATCT  
ATCTGGCATTATTTTATAATGAACTTTTTTTTTTAATCCTTACTAATG  
TCCTCAGCTTCTCTTCCCTACACCAGGAACATTCATTGCATCTTGT  
TATGCACATTCTTCTTCCATTGGAACTTTGATGACAACATCTTGACCTG  
ACTTCTCTCTCAAATCAAATTTTCACTTTTCACTTCTTGTGACCTACTTCA  
CCCAGGAATGCTTGCCCTCAAATTTAATTGAGAGCTCAGATTAATTACATG  
CTACTCTCTCATTTTCATTTTCATATATTTTAAACTTTTAAAGCTACACT  
ACGTGTGGCCATGTACTGGAGCCCCGTGCCATTTCTTCTCTCTTTTTTTT  
TTCTTCTTTGCTCCTTGCCCCCTATAGAAATTGGGTCTATTAGTCATG  
GCCTACTATGTTTTCCCTCCCTGGCCACAGATGCCCCGATTGAATTTGA  
CCCTTGCCCAAGACCAGGATAATCAGATTGCTTCCCATGTAATTTTGAAA  
TTGTGATGAGCTACACTAGTTGGTCTGTGATGGTTACTAGAAAAAGAAT  
TTGCAAACTCAGAAGCAGCGGTACGGTGGCCCTATTTTCATCATGGGAGTA  
CTAAAGAAAAAGCTTACTTTCCAGAGCAAAGAAAAATAAGGCATGGATGAA  
CAGAAATTGAGAAATTGGCAGACATTGGCAAGATGTTGGGTCGTTTTCTGA  
TTTTTGTTTGAAGTCCTTCTGAGTCAAAGTCTTTCTTTTATGTTTCATTG  
AAAGCACCATGGGAGCAGAAGGATTTTTTTTAAAGATTTTATTCATTTAT  
TCATGAGAGACACAGAGAGGTAGAGACACAGGCAGAGGGAGAGGCAGGCT  
CCACGCAGGGAGCCTCATGTGGGACTCGATCCTGGGACCCAGGATCATG  
ACCTGAGCCAAAGGCAGATGCTCAACCACTGCATCTGTAACAGCTGTTAC  
AGAAGGATTTTTTGAGACCAGTTTCTATCACTTGTCAGCATGTTCTCTTT  
AGGACAAAAGGGATTTTGTCTTTTAGGGTGTATGTCTCTATGTTTCTTGTT  
TGTGTGGCTTTTTGAATCAGAGTAAGTGTTTCTACAGATATTTAAATCT  
GGAAAGAAAAAAGTGGTACTTTTTGTTACAAAGATCTCAGGCTAACT  
GTGGAATACCCATGAGCTTTGGAGTCACAACGCTTAGATTTGAACCTCTG  
ATCTGCTGCTTCTAGCTGGGAGTCCCCTAGGGAAGTGACTTTCTCTGAG  
CCACCAATTCTCTCTCCTCATTTATGCTGTGCCCTTAGTCTTTAGCACAT  
CACTCGTCATATAGCTAGTATAGTAGGAAGTACAGACACAAGGACACTGGA  
TTTGCCAAGTCTGTTTTGGGCAGATGTAAGCACATTTTAACTTCCGTGCA  
TATTTTGTCTATTGGGAGAAAAATAACAGAAATCTGAGGGATTCTCACAG  
GTTTCTGCTGGCGAAAGCTTAGCAAATGATGAAGAAAAATGTACAGAACGG

TATGGGGCAACCCACAAATAGAATAGATGTTAAGGCAGAGTTAGCTCTTG  
TCAGGGCATTAGTAGAAAAATGCCATTACAGAAAGTAGTGTCTCCTACTT  
GGGAAATCATTGATATCCTGAATAACTATAGGACTTCCAAGGAGATTTTT  
AATGTATTCCTCATTTTTTAGCTTCTTAAAGATTTTTGTTTGAAGTCTCCA  
AGTCAAACCTGCTTTCTTTTATGTTTCCTTGAAAGCACCATGGGAGCAGAAA  
GATTAATGAACAAGCCCTATTTGATAAGAACAGACAAAAGATTTGCTTGA  
TCTATGAAGCTCATCCTTACAGAATAGCGATTTATTCTTTTAATCAGAAC  
ACGTTTCCTCCACTTGTCATGACCTGCTCATTAGTGTGAATTTGTTAATG  
TCCACCCAGATACCCCCCTTTAGACTAGAAGCTCCATGAAAGCAGGAATCA  
TTTGCAGGCTTGTTAATGTTTTATTGTCAGTGCTGCCAGAGTACTGGAA  
ACATAATAAGTATTCAATAAAATACTAGTTGTTGGGCGAATGACTGAATGA  
ATGAATGAGTTTGAATTTAGGAGATGGAATTACATCTTTTTTGGTCCTCT  
GGAAAATGCATTAAATTCAAAGATGTGTATATAATTTATTCAGATTTATT  
AAGCTGCTAATACCTGCCCCAAGACAAAGTCCTTGCCCTTTTAAACTTGGCC  
ACAAGTAACTTTTCCCAGAAAAGGAAATTTTAATAATTAGTTTTGCTTCAT  
ACATCTGTTAAACATATTTGTATAAAATGGTGCATGCATTTCAATTTTTTC  
AAAATCTTCCTTAACGTACATTTTAAACATGTGTTAGTTGGCATTAACATA  
CTTACTAGTTTTACCTTATCTGTGCCCAAAGTTAGGGCTAAATGGGTTTA  
GAGACCACATCTGCCCCCATATATTTTTGCCACTTTAAAAGATACTCGAG  
TGATGAATTAATTAATAAATTTAAACCTATAGTCGAAAAAAGAATGATG  
AAAAAGCAAATTGTGTATAGGAAAGGATGGAAACAGATACAGAAATAATG  
TAGTTGATGCCAAAAATATGGATGGGAGTTAAACCATTATTTTCAATGGT  
CTAGAGCCAAAATACCATATAAAACAGACTCCTAGATTGGCAGATTTATG  
AGAGAGTCATAAAAACTAGTGATCATAAAGTTGTTAGAGGGGGGAAAAAA  
TCTAAACACCATTTACTTTGATTAGATTACAGGATTGAACTAAACTAAATC  
TCAGAGGGGAAGAGGAATTTGTGGTCCAGTAAATAAATGTCTTCGTATT  
ATTCACAACTGTACCGGCCCTTCCGGGAAGACAAGTAGTGGGAGATGT  
CATCTTATCACCCACTTCCTTAAAATGATAATAAGAGCTGATACTTAGGG  
AGTGTGAATTTACAGGCCAGGATCTTTAGTTTCAGTTTTCTGTATATCCCC  
ACCTTGGACTGGACCCCATCATCTCTTCTTGAGTTACTACAGTAGTTTTT  
CAACATGTCCCCTGCTTCTGCCAGCCTGTCCTGTCTTTTCTCAAGATAA  
TAACGAGAGGGATCTTTTAAAAATCCTAACTCAGATCATGCCTTTGCTCC  
GCTAAACCTTGTGATTGTTTCCTCTTTCCTCAGAGTAAAATCAAAGTC  
CTTTCGATGGCCTTTGAAGTCTGTAGGATCTGACTCTCTGTTTGTCTTT  
GACTCTGTCTCCTCCTGCTTCTTCTCCCTTGGTTCCAAATACCTTGGCC  
TCCATGCTGTTCCAGAAACAACCAGAGTATGTGTGGAACCTTAGATCCTAA  
GTCTTGTTGCTTTCTTACCCAGAATGCTCTTCCCCAGATATCTTCAT  
TGCTAACTCTCTGATCTTGCTAAATCTGTTTGGATCAACTGTCACCTTTC  
AGAAGGGTCTGTGGCAATTAAAAAACAAAACTCCCCCTTCAACCTATC  
TCAGACATTTCCCATGACCGCTTATCCTGCTCAGTCTTACTTGCCACCC  
TCTAACGTGCTAAATAATCTACTTATCTATTTGTTTTGTAACCTACCTTC  
AGCTCCCACCAGAAATCTAACTCCATCAAGGACAGGGAACACATGAGTTC  
ACAGATCTATCCCAAGTGCTTGAAACACTAACACAGAGCGTGCTCAATAA  
ATATTTGGTAGTTATTTTCACTGTCTCACTGGAATCCTCACACCAGTTTT  
GTGGGAGGTTTTAGGGTTCTCTCACATATGGTTAAGAACCTGTAGTTGGG  
TTTCTTGACTTCCCATTGATTTTTTAAAAATTAATGTCTAAAATTCACAT  
CTATTACAAATTATTTCTATGATGCAGTTTTTAGGAGAAGATTTGGTTTTAT  
AGTTTAAGGAAACTTTTGAACTTGAGATAACTTGATATTTCAACTAATT  
ATTTTTGCCATAAATAGACTTAAAATTCCTGAAGCTAATATTCAGACTTT  
TTATTGACATTTTTTGCTTTGAAAATTATAATACCATGATAAAAATTCCTT  
TCAAAACATTAGAATCCATCCTCTATTTCTGTTTATGTCTTGGAAATCCA  
GTTCACTACTTCCACTAAAGACTGCAGTCATTTGCTTCTAATTGGGCTGC  
GTGTGCACTCCATCTCAATTGCAGGGCAAAGCTGCCTGAAGCATCTCATT  
AGTCAGAGGCTGGCAATAAACATCTTCTGCAGCCTACATTTCTGCCAGGA  
AAGGGCTTTACTCCTCTGTCCAGCTAATGGTGTTCTAGGCTCCTAATTGT  
CTCACATAAAAAATCCCCAATATTTAAGTGTCTCATCAGAAAAACAAA  
AAGCAACCATGGTGTCAAACCTAAAGCTCCATGACATATTCTAGAATAAG  
GGAACCCAGCTGGTTCAGCAATCAGCCCCAGAGAGAAGAGGAAGCATCCT

ACCAGTTTGC AAGACTCACTGGGGAGATACTACTTAAGAAGACAACCTGA  
TTCTCTCTTCCCTCCGACACCTCTCCATTTCTTTCCCTTTCTCTTCCACT  
TGAAGATTTTGTGGTTGACTTGAAGGCCAGAGAGGAGGTCAAGGAATTTT  
CTTAAGTTGCTACCACAGATGACAATCAATAAAATGTAATTCCCAAACCTA  
AGAGAATTTTTCAGGAAAAATCCAGGAGCAACTTCCCCATACCCAGCCAG  
ACAGGCTCTTATGAGATGTCAATGTCACCTAGAATGGTTTGGAGGAAGA  
AGTTCTAGGCCAGGGACTAATTTTTATTTACTGAGTACAGTAGTAAGGAG  
TCTTAGTTCTTAACCTGGGACCACATACTGTTTCGTTTCAGTTTAAGTTGAT  
ATAAGTATAATAGAACAGTGACTCGAACACAGTGAATAGCCAGTAAACAT  
TAGCTATTATCAGTAATAGTAGTTTTAATGTTCTGACTTACCATTATTAA  
ATGCTAATTACTAGGAGGTAGATCTCACTTAACACCATCAATAACCTTGT  
CATGTAAGCACTATATCTTCTCAATTTACAGATGGGGGAACTGAAGTTTG  
ATTGGTCATGTAAGTTGCCCAATGGTTACTCCATGTGAGGATATTGGTCA  
TACTGCGGTAGTCACATTTCTGTAAATAGATTTGATGCACGGATGCATTT  
TATTTGGTTCACAAATAAAAAAGAATTTGTGTTTCAACACTTTGAGTCAGT  
GTGAAATTTGGATGCCTTGCTAGTCACTTCCTATTATGGACCCTCGCTTT  
CTTTTGTCATTTTTGTGTTGCTTACCCTGTCTCTATTTTCACCAAATATTT  
ACTAAGGGCCTCTTGTGTGCTGGGCACTGTAAAAGATGGGAATGATGGTT  
TCGAACACAACAGAAAAACATACTTTTAAGGAGTTTCAATCTCTGTTAC  
AGAGCATACACTAGTTGATGATGGAGATATGTGATGGTGAATTATTTACA  
TAGACAACACCAAATCTGCTACCTTTCCAAGATAAAATTAGAAGTTGGTA  
TATCTTTGAGAGTTTCTCAACAGCTTCTCTTAAACAGAAAGCACAGTTGG  
CTGCCAAGGTCTAATTTGGGAAACATCAGAAACAATTTTGTCTTAAA  
TAACTTCTGGACTTGTACAGCACTAAAAATCACCACTCAAACTCATTG  
CTTCTGGTTAATGCAATGTCTCTTGATATAATCGTCATCTTACATATTCA  
ATGTTGATATGTTTGGATAGATCTGGTGAGTCTAGGGATTTAACCTTTGT  
ACAATAATTATAGGGTAGATCTGGTGAGTCTAAGGATTTAACCTTTGTAC  
AATAATTATAGAACCCATTATCATAAATTGATCACATTACGTGACAAAT  
ACTTCCTTCAAAAAGATTTACTTTGCCGTTTTTATTCTTTTTTTCTTTAA  
GTAAGCTCTATGCCATTATAGGACTTGAAGTCACTGACTCTGAGATTAAG  
AATTGCATAGTCTACCTACCCAGCCAATCAGGTGCCAGGCAAATACTTT  
TGATGGCAGAATGAAATGGGAAAATTTAGGCTGAATCTGGGGAAATTTGA  
GTTGCTGGGAACTCTTGATGGGATGGTCCATGGAAACCCACAGCCAGCT  
GCAGAGGTGAGAACTATAGCAATAGTCTATATTTGTTTCATTTCTCTCTT  
ATCTCTGGTACTTTAGGTGAACAAACTGGTAGGGACTAAAGTTTGAGAT  
TTTAAGTGGCATTATATCCAAATGACCATTGCTCATAATGATGCTGAAGG  
GGTCTGTGGATACCTTTGGTTGGGGCCCCATGTTTTTCTTCAGGAAGACG  
ATGAGGGCTGGATGTTGAAGGCAAATCAAGTAGAGGGCAGATGGCTTTTT  
TTGGTACCTCAAGATCCAGGACTCCCCACTGTACACATGCTTGGTGCTTT  
GAGAAGATGACTTTTGTAGCCCTCATCAACTTATGTCCTTAATAGTCTGA  
CTTTCAGGTGGGTTAGCCCATGAGGGCATTAACTGTGCTCAGAGAGAT  
CAGCCGCTACTTCTTTGGTAGTCTCTCTGCCAAGTTTATAACAAGTTT  
ATGCTATAGTTAGCCCTAGGGTACGTCACCATCCCTATGAGTTTCCCTTA  
ACCTCCTATATCTCTGTAAATACTCCCTTTTAACTTTTCTTAATTTCT  
CCATATTTTTCAGCTTTGTCACTGATTAATTCATACCATGTTGATCACAGC  
TAATACTAACTATTCTGTAAATAGTGTATTCTGTAAATAGCTAAATGC  
AACAAGCACATGCAGTTTGATATTTATGTACTCTCTTTTCCCGGACATTG  
TTACGTACTGTAGTGTCTCTTTTACTCTAACAGCTCATGGAAAAGTTTG  
ATTAGTCTCCCCATTTTCCACTTGAATAAACAGAGGCAAGTTAAATAATA  
TGCTCAAAATGAACCATGTTTAGGAGCAAATTGTTGAATCCAGGAAGT  
TGTGTACCAAGTACACTGATTTGTAGAGGGCTTTATACAAGTATAAAGGG  
AGGGAGTAATTCTAAAAACAAAACAGAAAATTAAGGAGCAGGGCCAGCA  
AATGGTGACCTATAAAGGAACAAGAGGCTAAGTTTATAAGACAAATGAAA  
AGCAATTTCCAGCACCCGTGTAAATGAGAAAAATGTATTAACGCATTAGAA  
CGAATAAGCTAAAAGGTGCTCAAGTGCCAAGTACTTCTGAAGCAAGGTCC  
TCTCTGATTTGAACTCTATTTGTTGCATAGTATGCAATTTCCAAAAAGA  
AGTATTTGCATGATCCAGGACCAAAATCTTACTTGAGTGTCAATTGTCAC  
ATTTTTGTTCTTTCTAAAAATGTCAAATTCTCTACTTTTCCTGAAACATC

TTCTTTCTCTGCCTGATGGAACCAAAGGGAAATGGGAATTTACCAGATTT  
AATTCAAATTTAAAGACAGTGAACCTTTTAAACAACACCAATTTGAACGCA  
TTCCATTATATGCTGATTTTTTTTTTGGTACAGTATTGTGAATGTATTTT  
CTTACCCTTTCTTTCCACGAGCTAGCTTTATTGTAAGAATACAGTTTGT  
AATACATATAGCCACATGATATGTGTTAATTCAACAAAAACCCAGACT  
AAGTAGAACAACTGGTGGTTGCCAGAGGGGTGGTGTCTGGGATGGAGGGA  
AGGCAAAACAGATAAAGGAGAATAAGAGTTACAGACTTCCAGTTGTAAAA  
TAACTGGAAGGAAATGGAACCTTGTACTTAGCAAGAATTAAGAAGAAATA  
ATTCTGCTTCCTTCCTGTCAGATATTTTAAGTTATTTATAAATGATCTTA  
CCTCAATAATTTTCAGTATAATAAACATAATTAAATCTGGTTTTGATTTTT  
GAAAAATGTTTAGTGCTTTAGGAAAATTACAGTTTGGATGCTCACTGTTAT  
AAGGAAAGCAATACATATAAATCTATAAGAGACAGAAAACAAGCTCTAAA  
AATACACACTGAGTGTCAATTGAAGGCTTTTTGATTTGTTTTGCACATATT  
TAAATGATTTCTTAAGCCCAATATTTTCAATTAATGAAAATTCACATTGCAA  
ATTTCTTTTTATTAATAATAAATAACAGTGATCAGAAACCATAAATTTATT  
CTATGATTTAATATTTCTTTTTTGGTTTTGTCTCCATATTTATTAAATTTAA  
TTTGTACAGTACCTTGTATGAGGTTAAAAGTACTATTGAGTCTATTTTTTC  
TCTCTTGTGTAAAGGCTGCCAGTTAAGTCAGTATCAAGTTAGAATCTTTA  
CTCTCTACAGTTGACCACTGAACAATGCAGGGCTTAGGGGTGCTGATTCC  
TGTGCTGCCAAAAATCTGTGCATGACTTTTGAAGTCCCCCAAACTTAACT  
CCTAATAGCTTACTATTGACTGGATGGCTTACCTGATAACAGAAACAATC  
CACACATATTTTGTATATTCTATGTATTAATATACGGAACAATTACAATA  
AGGCAAGCTAGAGAAAAGCAAAATGTTATTAAGAAAATCATAAGGAAGAGA  
AAATACATCTATAGCACTGTGCTATATTTAGAAAAAAATCCACATATAAA  
TGGACCTGTTTCAGTTCAAAGCTGTGTTGTTCAAGGGTCAATGCTGGTTAC  
TTATATAATTCTCTCACTATCTCTGCATGATTTAGAGATTTTTGGCAGCA  
ATTAACATAAAATAACTTGAGTCCCTCTTGAGCAAGAACATATGAAAGGGT  
TTATCAAATACCTCAGAATTAGTGATAGTATTGGGTCTCAGCAAAGGGCA  
TATACTAGAAATGTCTCAAGGTTCTGTTCAATGTTTCTGGAACCTGCTGC  
TTCTCCTGAGCTGCTTTCTGTCTTCACTCCCTACCGTATCCATGCCCTTT  
GACTTTTCTCTCCTTCTTGTCTTTACTTGGGATAATTCTAAGCTAGTGG  
ACATCCTCTCAGTCCCACTCCAAATCTATGCAGAGATGTGGACTGACT  
TAGTTTGGATCAAGAAGTTGCCGTGGTCCATTTCAGTTATGGCCAGGTCG  
TGAAATAAAGCAACATCCGTGAGGGGTACCTCTCATGAAAAAGGGAAT  
TAACAGAGAAAAAGGAGATTTGGGGTGACCTGGGAAGACACACAAATCTT  
TATACCCATCCATTTGTAAATGGTTTTCTGAGCTCAACCAAAGACTGTTTA  
TTTTAAGTGCCCTGCTTTAAATATGTTTTATTGCCTGTCATTTAAATTTG  
CTTTTGATTGCTTTTGAAAAAAGAGGGCTATAAACCTTTTCAAAGCAAA  
GGTTAAATAGGATCATCTTGATTTCAAGCTGGAATATTTGAGGAACGAG  
TTCTTAAATGGGGGAGACTGGGGAAGGTGAACATATTTTATTGCTATGA  
ATTCAGCGTTCTCTCCTGAAATTCATTGTTTTCTTTATTCTTATATCTGC  
TCACCCAATCCTGATTATTGGAATTATAGTCCATTATAAAATGCTATATT  
TTATTATAGAGAATATTCTAAAAATATAAAAAAGTACATACCAAGGAAAA  
CAAACATAGCCTCCCACCAAAACAAGCAATACATATAACCCTTGTATCTT  
TCATCCAATGGAGCACCTGCTGACATTTGAAACAGTCAATCCAGAAGGTC  
CTTGCTCGAGTGTGAGCTGCCCTAGCTGAGTAGATTTCAGTTCCAGGACAG  
TTTCTAACCCTTTTGAGTGTTCCGGTTGCTCTTTGGATTTGACCATAG  
AATTAGAACTGTTTGATTCTCAATTCTTAGCTTCCTTTGTGGATTTTTGT  
TTGTCTTCTTCCCAGGTCACCTGGGTTTTATACTTCTTTTGGTAGGATTG  
CATCCAGTAGCTGGATCCCAGCCCTACATTTGATGTCCCCACTGAAACAA  
TTTAGTTCTCCAAGAGGAGATTGGGATATATTTATATTTTGGTGGTATA  
TTTCACTCCAGTCTTTAGTATCCAAATAGTTTCTCTTTATTGTGTTACTT  
GGGTTTATGTGGTTTATGCTGACTTTTTTTTTTTTTCAATTTTATAT  
TCCATTGCACTAATCAGATTCTGTGTATGCTGTCTTCACATCTATATTAC  
CTGACATAAACTTCGGCATCTCTCTCCACACTTTGCCCTCAAATAATCTAA  
TTACATAAAAGAAAACAAGATAGACTATTTTAATGACAGGTGGAGGCAAG  
GACTTCCATTGTACTACACGTTTGAAATGCTTCAAATCTTCCCCACATT  
AATCTCCTCAATCTTATCTTTGCCATTTCAGAATTTCTTCTCTCCCTTCAC

CACTTCCCAACCAAGGCAATACTCAGGTTATCCAGCACCCCTCTTTCCAGT  
GCCTATCTTTATTTTTTTCTCCTCTTTCCTGTTTAGAGAAATTTGATTAG  
TTTTACATAAATACACTTTTCCGGAATACAACCCTTCACTTACTATTACT  
TAAAAATAAATGAGGAATTATAAGTTAAATTTTTTTTTCTTACATTCTAGG  
ACTTTAAGAAACACCATTTAAATGGCTGATTAATATTATTCACAATTGAC  
TTATTGTTTATTGAAATCCTTCATTACTTCACCTTTAAGATGGTTTCCTT  
TTTCGACTATGATGTGAAATAGTTTGTACAAAGTTTTCGCTCTAGCTTTT  
GATTTTTTGTCTTAATCTCCATTGACATACTAGATCAAACTATGAATGC  
TCTTAATAAAAAATTCCAAAAATAATTCCTTTATATTTTTGGGAGCAATA  
TATGAGGGCCTATTTTTACTATACCTAGTTAGATATGCATATTATAGATTT  
TTTCAAAAAGGTGTTAAATAATTAATAATGGCTTATAATTTGCACATTTCT  
TTTTAACAGGTCATATTGAATAACTGTTTACTAATTATATTTCTGAATTT  
AATTATAATTTTTATATTTGTGTTTTGAATAAGTCATGAGGGATTGGGTCA  
TGCTGTGAAAATGTACTAACCCCAAAATATCAGTGTAAGCCATTTTGGA  
TTCAACAGCTCTCCTGGGCACCTTTCTTCTAAGATTGGCACAGGACATGCT  
GTTCCCTTGCAAGTCTACCTTGCTTGCTTTTATGTAATATCTGGAACCC  
CGACTTCCAAGGGTTAGTATGTCAGCAGAATAGGTCCCATCCAGATTTTC  
ACTGCCTCAGCCTGCAAAGAACATGCTTCTCTTCTTACAGTTCACTG  
GTCAAACTGGTTGAATCACTCCACTCAGACATAAGAGCACAGAGAGAGA  
GGAACCAGATATTTCTGAGAACCAGCAATCTCCCAACACATGCGTAGTCT  
ATCCTTCATCCTTTTACTGATTGTTAGGCAACCCAAAGCATACAACTCT  
TTGTTTAATATAAAAACATCAGCCTCTGATTCTCCCTTGCTGCAGACTTT  
TTTAAGTTTTCTATTTGCCTTTAAATTGTGGCCTATTCTGTATTTGCCAA  
GAGTTTTCTGTCACAAGTATTGAAATTGCTTAGGAAGAATCAAGAAGTGT  
CATTATATTATTTGTAAAGAAAATGTCAGAGAGAAACATGTCAAACCTCG  
AGTCTTTCTCTAAAGATCGCTTTATCAGTTAAGTCCTGAAGGAAGTAGAG  
GATCTAATCAAAAACAGCTGACTTAGCGATTGTGATGGAAAAGAGAGAAG  
TACATAAAAAGAAAACATATTAGATGAACCTTTTTACATTAGGGTATTTGA  
TTTGAAAAATGAGCAGTTGAGGTACTTAATTGCTCTAGTGGTTCTAGACC  
TTGCTTTGCTTTCATTATGGCTAAATTTTCCCAGGAGATGTTTGATTCT  
ATCTTCTCGGAAGAAGAGCACCCACACAAGTGAATTAAAAATATAAGCTAA  
ATTCAGCTTTGTTCAAGTATGCCTCCACCTAGTGTCTCTGCTCTGCTCCC  
CATCTCCGTCCCACCCACTCCCCAGGAAGAAAGAAAGACAATATGAAT  
TTATTCATGCTTAAAGGTAAATGAGCTATAAGATTTTTGTTTACTTCAT  
TGATGTCTGACTAATAGTATGAGGATTGTCTTACTACAAACACTTATTGA  
CACTCTTCAATAGCCATGGCTCTGTGATCTGTCTGGAATCAGGCATGAAA  
TTTGATATAAACATGATTTCTGAATTATATAGATAAGCTTTGCTAAAGTA  
CTTCTCCGTGCTTTCTTCCATTTCTTTTTTAGTTCTCTCCCAACAAACAT  
TTTATTAACTTTAACATCTGTCATCTTCTGCAAGATTTATTATGCAGGT  
CAAAATCACATGCCATTTTTTTTTTTTTTTTATTGAAAAGAGCAATTTTCAG  
CTGACACAATCCAACGCATTTATTCTGGGTATTATTATGCAGAATTTTG  
ACTTGAAAATTTTTAATTTGAGTTTAGATTGAACCTTTGTTTCTGAAA  
TTGCTTCCCTGTACTTCTTTATATAATCTTTCCTTGATTTCTATTACTT  
CTGTGGTTTTCATTTGGTACAGATTTTATAGAGTTAGAGAAATCAAGGATC  
AAGCATCTCTACCCTGCTTCCAAATGTAGCTCATACTGACTCAGTTTTG  
CTAAAGGGATGATTGTTAAGCAGGAAAAAAGGAATGAAATCTCAGCAAAG  
TAATGATTACACACAGTTAGTACAACTTAACCAGAAGAAGCGACCTGAT  
TAAAAACAGAGTTGTTATCTGCTAGTAGGAGGTGTAGGTAGGAAAATGGC  
AGTTTCCCTAATAAAATGGAATTTATTAAGTAGCTAAGTCTCATAAAAAT  
CTGTTCTGCTGAAAATATGCTGCATGTATTTACAACATTAAAGGGAAAGTG  
ATCTATGATATTCTAATCTGAAGAGCATCAATGCTAAATTTTAAAAGCCTG  
ATACGACAGACAAGAATGGAAGGAGGAATCTCCAATATATTCATTTTGT  
GTTCAGAAAAGGAGACCCCTTTCTGTGGAGTCATGGATGTCTGTGGGTGA  
TCTTCTTATAAATTACTATCAGACCAGCCTCCCTGGAATACGGTAGGGTT  
AGGTAGGGTGTTTAATGTGGAGGAAGCCACCAGGTGTACAAGGTTTAGCT  
AGTTAGGTAAGTCTGAAAATACAGTTTCTAGACTTATACTTCACGG  
AGATTAAGTTTAGGAAGCTCATTAAGATCTAGGATCCTAGTAGAAAGAGT  
AAGAATACAGAAGTTTGTAAACTTGCCAAATTCCTAAGTGTTTTTAGCTC

TTTGGTGACAAGAGGGGAAGAGAGTTTTGTTTACAAACATATGGCCAAAG  
TTGATAAGATCTAATTATATGTTTGCAGCTGTTTTCGAATCTGTAAATATC  
TGAAGTTGGTCAACATTATCGACGCATGACAAAAGCAGTATAAATAAAGG  
AAATTAGCTAAAAATTGAAACAACAACAATGCCTTTTGAAGGGAGGA  
AATTAGGAGCTGAGTTTTCTAAGTGTGACTTAAACAGGATAAAGATCGGA  
ACAACAATGCTCTACGTACATAAAAAGTTTACACCTCATTAAGGAGCTCT  
GGAACCAATTTCTCTGTACTGGAAAACCTCTGACAAAATTCTCACCAGTT  
TGGACATACTTTGAGCAAATAAAAATTCATTAGTGTTATAAGGGACAGCTT  
TGGTCATTTAGCTAAATTAGAAAACCTCTTAAAAACAAGTCAAGATTTTAG  
AACATTTTTATTGAATGGTTTTAAATAGATTGTAAAAAAATTAGGGCAAA  
ATACAGTGTTCCTGAGAAAGGATAACTGTGAATGGATCTAGATTTGCCA  
AGAGCAATAGTTCCATACATAAGATGATCCGTTTTCCAAAGAACTTCATC  
ATAAGAACAAGAAATTACAAAATAAGGAGCCATTTGTATGTTTAAAGGCA  
GGAGTATGGGTGGGAATAGTTGGGGGAGTTGATGGATGTTGATCATTCAA  
ATTCTAAAATACAGATTAATCAAACCTAGGTAATTTTATATTAAATAAATG  
AAATATTTGAGGAAACAGAGTAATTTATATGTAAATTTTTTACCCTTAA  
CATCTACTACCAGAACCTGTTTCTGTACCTGAAACAGAAATATTCAATATG  
TTTGCCAAATAAAGGTAATACTCCCATTGGACCAACAAGTTTAACGTCTG  
CTCAATACTGCTTTTACTGTGTGTATAAATGTGCAAGTATATGTAAGTAC  
ATATTTGTGATATGTTGCATGTTTAGGTACATATGTTTTAATGGCAGGGG  
TACAAGGTACAACAACCTTGTTATTTACATGAAAGGGAAAAAGGTAATATT  
CAGGCATGATTACAGACAATTGGCCTGATGAGGCAGTTCCCTAAATATTTG  
TGCATCTACCACCTATCATTTGGGGCTTGTGTTTTGCCAGGACCATTTAA  
CCACTTCATGTTAACCAGCTTCAGCTAGTATGCCATTAACACTACAATTG  
GCTATTGTGGTGTCTGTCAGAAATGTCAAGATGACCGAGATCACTTATCAC  
AGAACAGAGTCAATAGGATATTTTTAAAAATTCACATTTACTATACCAAT  
AGCTGGATGCCAAGTATTCATCTGTTCCAGTGAAGATAACTCATCCCACC  
CCATAACTATAACTGAGTCTTCCATTTGGTTAAATTCATATATGTCCATT  
ATAATCCTATGTATTTGATTTCCATAGGGGTTATACTACTGAGGTGAACA  
AGGATCTAATAGGGATCACCAAGTATCATTTAAGTCCTTGGGGAGTATTGC  
TAATACTGCATTCAACTTCGTATCTTGGCTAAAGGAGAAAAAGTTTCAGG  
GACTACACTTGAAGGCTCTTATTCTACAAGTTGAGGGTCTATCAGCTCC  
TAGGTAGATCCAACCTAAATATGCACTTGAGGACAGGGGGAGTAATCACA  
GGATGAATTTTCTGACATATTTGAATCACCATCACATGGACCAAGAACAG  
ATTTTTTTTTTTTTCTGGAGCCCATAAACCTTCACTCTGACCAAAGACTA  
TGATGGAGTATTGAGTCTCCTACTAAGCTCATGTCAAAACTTGCATCTAT  
CATGCTTTAAGAAATCTGGTCTCCTTGAAGGAAAACCTTAAGCAGTGAAT  
TCAATTCCTGTGAACCTGACTTGATCTAGAAATGTTACAATGACTTTATC  
AGTTCTTGATTTTTTTCTGGCCATATAAGGCAAGTAATATAATTTGATGT  
CTGTCTATCTTACTCTGGAATACTACATTCTGTTAGTTTTACCATAGAT  
GCCCATGAGTCCGGTAACCTGATGGCCTCTCTGTCCCTATTGCTCATTGA  
ATGGATTGACTACCTTGCCCTCTGTGAATGCTGGGAATGACCCTGAGTTTT  
CAGCCATCAATAAAATGGGACCTAAATCTCTATAATCACAAGGAACAGAT  
GAAGTGTATGAAATATATAAATGGATGATGCACACATGTATGTGTGTATG  
TGTATCTGAATAATCTTAAAAGTTCAATTATACATCTGTCAATGTTATCA  
AATCCATAGGATTTTATTGAGAGAACATATTAAATGTCCAAAGAAATGGC  
AATATATTTCTATAAAGCAAACATGGAATCAGTGTTATCTAATTAAGTGTA  
ATACAGCTGAACATTAATAATAAATAGATTACAACCTTCTCCTAAGCTTG  
TAGAAATTAGAAAATCACTTGTAAATGACTCTCAGATCACTGAGAAGTTAA  
AGCTGCAATTGCAGTCTATTCTAGTGATGAGCAGCAGTTAGAACACTTTG  
AACAGTGTGGACTGCAACCAACATTAAAAATTCATAGCATTAAAGCCATTT  
CACTATTAATTACAAAAATAAAATTAAGCATTTATCTGAGGATTAAAAAG  
AAAAATATGAATAAAAAGGTAAGGGATAGGGTGCCTGGATGTGGCTCTGTC  
TGTCAGCATTTGGCCTTTGACTCAGGTCATGATCCTGGGGTCCCTGAAATT  
GAGCCCCACTCAGTGTCCAGCTCCCTGCTTAGCAGAGGAGTTTGCTTTTC  
CCTCTCCCTCTTCTGCTCCCCCTCTCATGCTCTCTTGCTCTGACAAATAA  
AATCTTTTTTTTTTAAAAAAGAGTAAGAGATATGGAGGAAGAACT  
TATAAAATGAGAAATTAGTGGTGTAGGTCATACAAAAATGGAATTCCTAA

GAAAAATCCCTTTGTTTTTCACTTTTAGGTATACCAAAAAAATTTAGGAA  
CAAGAATGGTGGCAAACTACTGGTAAAATATTTTTTCAGAAGTATAAGAG  
ACAATGTGTAACCTTCATTGGAAAATGTGATTGCACAGGATTATCACCGAG  
GAAAAATATAAATTTTATATGAATGACATAATTGCCTCATTAATAATATGAA  
ATGCTATTTAAACAAGAAAAATGAAAAGGCAACAGGGGGAAAAAGATCAAT  
AGGAGAAGAGCAGTAGATACCAGATCAATTTTCCTCTAAAGGAACTGTCC  
TCATCTTAATTTATAATGAAGTGATATTAAGACCAGGGAATATATGACTT  
GCACACCATTCAAAAACTCTCATGGCATGAAAGTCAGGCAATATTCAAGC  
ACTAGCCTCTCAAAGACAGAGGATTTACAAAATGTTGTGATATTGTATTG  
TTTGAAAAATAATTTAAAATCCCCTTCTAATTTTATTTCCCATCGGTTTT  
CCATACCAGTTTTCCATTTTAGACACCATAACTGTAATCAGCCATGTTCA  
TGCAAGTACAAAGGGTGACAAAGAGACACTCAGATATATGAAGGAAATGA  
GCTCAAGAAAGGAAGCAACTTTTACCATTGCCTCTGAGAGGTCGTATCTT  
ATCCTTTACTACTGATTAGATATTCAATAATTATTGAAGTGCCTATAATG  
AACAAACACTGTGTTTCAGTGCTAGAGGTACTCCCCCAAGAGAAATAGCTG  
GAATGGTATTGAAGTTGCACATACTGTCAAAGAGTATTTGTTCTCTTGT  
TCTTAAACTAAATTTCTGTAGAGTATTTGTGACCTAGGACTTGGAACAGG  
GACTATGTTTTAAAACTGAAGGATGATGATCCAAGTCACACATATGCCA  
GTAGAAAGTACAACTGACCCCTGAACAACCTGGGGATCAGGGGCACCGAA  
CCCTGGTACAGTAAAAAATCAAGTATACTTTTTCTCCCCACACCTCAAA  
CTTAAGTACGAGTAGCCTCCTGTTGACAAGAAGCCTTCCAGTAACCTAA  
AAATCAATTAAGACATACTTTGTGTATGTATTCTATACTGTATTCTTTTT  
TTTTTTTTTACTCTAAATAGCATATTTTTTTTTTTATTGGTGTTCAATTTA  
CTAACATACAGAATAACACCCAGTGCCCGTCACCCATTCACTCCCACCCC  
CCGCCCTCCTCCCCTTCTACCACCCCTAGTTTGTTCCTCCAGAGTTAGCAG  
TCTTTACGTTCTGTCTCCCTTCTGATATTTCCACACATTTCTTCTCCC  
TTCCCTTATATTCCCTTTCACTATTATTTATATTCCCCAAATGAATGAGA  
ACATGTAATGTTTGTCTTCTCCGACTGACTTACTTCACTCAGCATAATA  
CCCTCCAGTTCCATCCACGTTGAAGCAAATGGTGGGTATTTGTCATTTCT  
AATAGCTGAGTAATATTCCATTGTATACATAAAACCACATCTTCTTTATCC  
ATTCATCTTTTCGTTGGACACCGAGGCTCCTTCCACAGTTTGGCTATCGTG  
GCCATTGCTGCTAGAAACATCGGGGTGCAGGTGTCCCGGCGTTTCATTGC  
ATTTGTATCTTTGGGGTAAATCCCCAACAGTGCAATTGCTGGGTCTGATAGG  
GCAGGTATATTTTTAACTGTTTGAGGAACCTCCACACAGTTTTCCAGAGT  
GGCTGCACCAGTTCACATTCTTAAAGGAAGCTAGAATAAAATGTTAAGAA  
AATCATAAGGAAGAGAAAAATACATTAATAGAACTGTATTTATCAGAAAAC  
CCATATAAGTAGACCTACCAGAGCTCAACCCATGTTGATCAAGGGTCAAC  
TGAATAGTAATCACAGTGCTAATGGGAGAAAGGTGGCACATCCAGATTGG  
ACAGATAGAATTTAAAAATGGAGGAGGGGAGCTATTTGCAAAGGTAGGGG  
TCAGGTTTAGAAAAAGTAACAAGGAGTACTGCCATACAGTGAGGATGCTA  
GGGATCCATAAGTATGTTACCTGAACATAAAAGGGGGAGGCGATGGAGCC  
ATGACCAGATTCTGACTCAAGAGGAATAAAGTGGGGCTCCTTAAAGAAGC  
TGCGAGCTTCAGTAGTTAGATGCTGCCGGCCTATGGGAACATGCCAGAGA  
AGCGGACCACACTCCCCCTTCCCTGTTATGTCTATGTCTGTCAAACCCAA  
CCAGAAGCTAGATGTCAACAGAATCCATCACTAGTCTACATGGGTCTGCC  
CCCCTAGTGCATATAGCAAGCTGGACGAGGGTAAATAGTAGGTCTGGAAC  
AGCAAACAATATCTCAAACAGAATATTGGGATTTTGTTTTTCCTAAAATG  
TAGAACC GGCTTCTACTTCTGTATTCTATAAGAATTGGTCTGATTTGTCA  
AAAATAAGCAGCATAAGCACACATCACTCAGCATCAGGGAAATACAA  
ATCAAAACCACAATGATAGAACATGAAAGACTCCTAACTCTGGGAACGA  
ACTAGGGGTGGTGGAAAGGGGAGGTGGACGGGGGTGGGGGTGACTGAGTG  
ATGGGCACTGAGGTGGGCACTGACGGGATGAGCACTGGGTGTTTTTCTAT  
ATGTTGGCAAATTGAACACAAATAAAAAATAAATTTATATAAAAAAACCA  
CAATGAGGTATCACCTCACACCTATCAGAATGGCTAAAAATTAACAAGGCA  
GGAGGTAACAGATATTGGCAAAGATATGGAGAAAGAGGAACCTCTTACA  
CTGTTGGTGGGAAGGCAAACTGGTATAGCCACTCTAGGTTCCCTCAAGAAG  
TGAAAAATAGAGCTGCCCTATGACTAAGTAATTGCACTACTAGGTATTTA  
CCCCAAAGGTACAAGTGATGATCTGAAGGGGCACCTGCACCCAGTGT

TTACAGCAGCAATGTCCACAATAGCCAAACTACAGAAAGAGCTGAAATGT  
CCATTGACAGATGGATAAAGAAGATGTAGTACTATGGAATATTACTCAGC  
CATCAGAAAGGATGAATCCTTACCCTTTACATCGACATGGATAGAAGTGG  
AGGGAGGGTATTGTGCTGAGAGAAATAAATCAGGGAAAGATATTTATCAT  
ATGTTCCACTCATGTGGAATATAAGAAACAGCACAGAGGATCATAGGGG  
AGGGGAGGGAAAATGGAACGGAAAGAGGGAGACAAAACATGAGAGATGCT  
TGAAGTGTAGAAAACAAATTGACGGTTGCTGAAGGGAAGGTGGGGGATGAG  
GTAATTGGGTGATGCATATTAAGGAGAGCATGTGATGTGATGAGCACTGG  
GTGTTATATGCAACTGATAAATTTTTGAACACTACATCTGAACTAATGA  
TGTCCATATATGTCGGCTAATTGAATTTCAATTAAAAAACTGGCATAAAA  
TAAAAATATATAACATATTAATATTTAATGATTTTGTGAAAAGGCTATCCT  
GTCCCTCCAATTGCCTGGCCACATGACATAGTTAGAGTACTGGCTTATACG  
TTTGTAGGCTTGCACTCCTTAGACCTACTCTTTAGAGTATGTCTTTGATAC  
CAAGCTCACCTTGAACATTTGCAGCACCTGAAGCAAGAGTAAAAAGAGAG  
ACTCACATACCATATGTCAAATATTTAAAAGTTACATATCAAGCTAACAG  
ACTGTTAAATAAAATCTGTTCTATTCTCTCTCTTGGCAAATATATCTTC  
ATAATTATAAAATTGAAAAGATATGTTCAAAGGCTTAGCTTTTATGTGACC  
GAAAGCTGGCAAATACCAAAGATGAGTGAATTTACTTATTACTCTGCAT  
GCCTGGTGTCTGTTTCATAAGCCAGCAATCTTTGGATGAGTAATGAAATA  
GATATACACAATTCATAATGATTGTATATTTAATAACATTTATGTTTAT  
TGCTTTCATTCTAGTAGGATCAGTGACGTTTATGTAATCAATATTTTAC  
CTAATTGGTATACTATTGATAGATAAGATTTAACATTTTAAATATAAATG  
TAGTGAAAGCATTTAAATATATGTCTTAATCTACTTTTAAATTATTCAACA  
ACTATTTTAGTTAATAACCTTATATTAGTGAAATCTAAATCTATTATAAG  
TAAATTAATTTGTAACACATTCATAAATTATTTCTCTTAGATATTCAAA  
AGCTAATTTATAAGTAGTAAATATCACAACTTCAAGCAGAATTCCTTAAA  
CAGAGATGAAATTGAAATTTGTATTTTGAAAATTTAAATTATGTTAAATT  
TATAAAATAAACTAGGGATTTAGCATTCAACGCCTACCTGATAATGGAG  
CTTTCAAGTTTCACAATTATGTCTAAGATGTAGATATTTGGAAGTTTAAA  
AGTAATAACTTTAAGATTTATGCAACTGTGATGAATATCTCCAGGCTTGT  
GAATTACAACATGAGAAGCCAGAAAATAGTATCTCAGCATTACTGAGAGA  
AAAAAAAAAAAAAACACTTTAACCAATAATGTAATGCTCTCATGCTATCT  
CAAAAGGGAAATTTGATGAGGTGGTTAATTTGTCTTTTTTGTGTGTGTGA  
AGCATTTTCGAGCATTCAAGCCCTCTCCCTACTCTGAAACAGTGTCTGCCT  
CTTATGTTGGCAGGGACCCAAACCCAAAGATCAATACATTTGGTCTCAGT  
GGACTTTTGATACAAGAATAGAGTATGAGAGATGTGAAGATGTGTTTTCT  
GAGCCTGAAAGGGGTAGTCATGAGCACAGGTGTTGAGAAAACGCTGTGC  
CTGTGAGTGCTCACTTCTGAGTGAGGTGCAATTGTGCTCTCTAGTCAATC  
ATTCATTGTCTCGTGCTATGCAGAACCGTTTGAAGCACGAGGCCAGCAA  
GGGCCACATCAGCCCAGATCTAAGGGTGGTTCTGCTTGATCCTTAGGAAG  
AAAATTAATTTTTTAAAAAGACAAGAAGATGTGCATACCAATACACATGC  
CCATGTTCCCTCCATGCTTTCTTACACACCTACTATGCCTCCAGTGAGGTG  
TGGGCGCTCTTTATGAGCATGTACATGCAGATTTATCTGACAAATATGCT  
TTATCCTTCAGATATAAATCTTATTAAGACTTCTTGCAATATTAGAAATA  
TGGCAGCTATGAAATGAGTTTCCATCTCAATCATGTTCTAATTCAGTTC  
AATGAGTAATGCTCTTAAAGAGGTATAAGGCGTGGTAGGGCCTGTAGACA  
ATGATCTCTAGTGGTAATTGCTCAGAGCCTAAATTCCTCTAGTTAGAAAG  
TTAGGAGTGATCCTATTGGAGAAGGAAAATAGATCCATCAAGCACTCATG  
GGAAGATTTCTCCATTGCAGAGCTGTTTGTGTTTTGTTTGGTTGTTTTGTT  
CCTTTTTTGTAGTAGAATGTGTTCTTCAAATTTAGAACTTACTCAAAA  
TTTGTATATTTAGTTACAACCTCAAAAACCTATGTCTTGCAATGTTCAGTGT  
CTCTCTTCCTTAGGATAAAAACTACAAAAGTTGGCATAAGCGTTCCATTT  
TTCTCTAGTCCTCTCAAAGAGAAATCTTCGAAATTACTTAAATGAGTTC  
TGACACTTATATTTCACTCTTTAAACTGTAGGTTATCAGGGCACTTGGG  
TGGTGCAGTTGGTTATGTGTCCAACCTCGGTTTCAGCTCTGGTCATGAT  
CTCAGGGTCTGGGATTGAATGCCTTATAGGGCTCCTTGTTTCAGCAGGGA  
CTCTCCTAAATTTTCTCTCTCCATCTCCCTCTGCCCTTACCTCTGTGTT  
CATTTCTTTTAAATAGATAAATCTTAAAAAACCTGTACGTTA

TCATTGCAAACATTTTGTATTTTAGTGGAAGTCTCTCACTCTTAAAAAAT  
TGATAATTTGTTGAACCTGAGCTGAAACTATAGCTTGTCATCTTTTCTGT  
AGATCTATGAAAACAAAAGCAAATTACTGATAAAAGAAAAAAGTTACAAA  
ATACATCACTAATCAACAATTTTGTGTATATATAAAATAATCAGTTCCTT  
AGCTATGGTGTGGAATTCACCTAATCTGGAATCCCACATATGAGTAGTTC  
AAAAATGTACTTTTGGTTTAGAAGGTCATTTAGGGATTTGAGGTTGACCC  
AAATTTCCCTAGTAAACTCTCCCTTTTCACTGGTTTTACTCCTTTTTATG  
AGAAAAATAAACTAAAGGAAAAATAGAACCAATACGATGTAAATTGCATT  
CTATAAATCTCAATCTTTTTGGTGATGGTGACACAAACCATAAATTATAT  
TCATCAATGAAGAGAGTTGAACACAAATTTAGTGTTCTTTTATTACCCAG  
AGTTCATGACCAGTAGCTTTTCAAAGTTCTCTATTATGTAATGGAGGAGG  
GGTAGAGAAAAAGTTGAAAAAAATAGATCTAATTTTGTGTGGACTTCCTT  
GCTGACAAATCAGCAATCCCAGACTCCTGAGCATTTTTGATACATTTAGT  
TCATCGCTGCTGAAAACACAAACTCTGTGATGGTTGGAATGGATCCCATG  
TTTCCAAATGAACCAGGTAATCCTGTGCAATCATTAACAAGGCTCTCTAT  
CAATAGCTGGATATATGTGTGATTCTAACAAGACACTAACATTTAGAATA  
AATCAAGTTTGAATCACTTGAACCTACAACCTACACAAATCATGGTAAGTTT  
TTATAGGGCTTGATGGTTTCTTTCCATTTTAATTCCTTAGAAGGATAT  
TTGCTGCAAGTTTGGAAAGTGGTACTCTATTGGCTAGAGTTTCCAGTA  
TTCTGTGTTTTGTTTGGTTTTACTCTGCTTTAAAAAAAATAATGAATTTA  
TATGCCTTTAGATAGTGCTGCAGTCCCCACAATGCCCTATTTTATAATAT  
CAATCCCATTGGAAATTTCTAGCAATTATCTGAGTTTTGTGAGTTTTGTT  
TTTCTACCATGTTCTCCATTCCCTTTTTATGAAAGCCTGTGTATCTATTT  
AGGATTCTCTCTTCATGTCTTGATTATTTGGAAAAAAAATCTATATTCA  
AATAAAATTTCTTTATCTCTGTCCCTCCATTGTGGGTGAACATTCTTTGTA  
TCATTCTTTCATTCTCAGATTCTCTTTGAAAAGGTACTATTTCCGAGTAC  
ACCTTTCTACTGTGTCTTTTGTTTAATGACTGCCATTTTAATGTCCATGA  
TTTTCCAGTTGCTTATTTTTTTATGGATACTTATTGTTTCACTTACACCT  
GTACTTTTTTTCCACAAAAATGTGATTATTTTACTCCATCTCTAAAAAG  
TTCTGAATTCCTTGGGTTGCGCTAATCCAGAACCTGGATTTATACAGGC  
AATTGAGATACCTCATTACGGTGATAATGGACAGATTGCAGGCTATGTGA  
GTAACTGGTAGGGTAGTAGGCCCAAAGCACTTATTTGAGGCAATCCCA  
GTTTTCCCTCCTAAATATACAGCATTGTATGCTGTAAATCTCATACAGGAC  
AATTATAGGCCATGCTTACCTTACAGGAATTGAAGTTCTCATTGTCCTTT  
GCCTCGATGCTGACTACACTCCCTTTTGCAGATGTTAGCCTATCAAATAT  
TCTAAGATTACCTTTAGGTCTCCCCTATATCACCTTTTCTTTAAGCCATT  
GCTAGTTGGGTTTTTTTTCCCCCATTATTTTCCATTTGATAATTTCTGGT  
CCAACTGGTCTCCTTTAGAAAGATTTCAACATAGGGACATCTGGGTGGTT  
CAGTCAGTGAAGTGTCTGCCTTCAGCTCAGGTCATGATCTTAGGGGCCCTA  
GGGTGGAGCCCTGCATTGGGCTCTCTGCTCAGTGGGGGTCTGCTTCTCC  
TTTTCCCTCTTCCCCTTCCCTCCTTCATGCTCTCTCTTAAATACATAAAA  
TCTTTTTTAAAAAAGAACAATTTCAAGTATGTTTATATATTGGGAGTTCCA  
GAAGTATTACCGATTAAATCCAAAAACATCCTATTGGCAAATAAATGGAG  
TTATTATAAATACTATATTTGTAAAATGTGATAGAACATGCGATGTATTA  
ATAAAATATGCCAGATGGGGCTTAAATTATACAAGTATTGAATGTTGATT  
AGAAGGATAGGCTGAGGGGGAGGAGCAAGACGGCGGAAGAGCAGGGTCCC  
CAAATCACCTGTCCCCACCAAACCTACCTAGAAAACCTTCAAATTATCCTG  
AAAATCTATGAATTCGGCCTGAGATTTAAAGAGAGACCAGCTGGAATGCT  
ACAGTGAGAAGAGTTTCGCGCTTCTATCAAGGTAGGAAGACGGGGAAAAAG  
AAGTAAAGAAACAAGAGCTTCCAAGGGGGAGGGGCCCCGCGAGGAGCCGG  
GCTGAGGCCGGGGCGAGTGTCCCAGGACAGGAGAGCCCCGTCCCGGAGA  
CGCAGGAGCTGCACCGACCTTCCCGGGCGGAAGGGGCTCCAGGGAGGTG  
GAGCAGGACCAGGAGGGCGGGATGCCCTCGGGCTCCCCGGGACAGTAAC  
AGCAACTGCGCGCCAGGAGAGTGCGCCGAGCTCCCTAAGGGCTGCAGCG  
CGCACCGCGGGACCCGAGCAGCTCGGGGGGGCTCGGGGGCGGCTCCGCG  
GAGGGGGCTGCGCGGCCCCGGGAGCAGCTCGGTGGGGCTCGGGCAGAGGA  
AGAGGCTCCGTGCGGAGGGGGCTGCGCGGTTCCAGGAGCAGCTCGGAGGG  
GCTTGGGCGGCAGCTCCGCGGAAGGGGCTGCGCGGCCCGGGAGCGCGAAT

CCACCAGCGCAGGCTCCGGAGCACAGGGCGCCGGGACACAGCCCAGGATC  
CCGCCTCCCCCGGGACAGGCAGAGGCCGGGAGGGCCCAGGACAGCGAGGA  
CGCTCCTGCCCCAGCTGAGCAGATCAGCGGCCCCGCCCCGAGCCTCCAG  
GCCCTGCAGACGGAGTTCTTCCCTGCGGAGCTGAATCCAGGTTTCCAGAGCTG  
CCCCGCCACTGGGGCTGTTCCCTCCTGCGGCCTCACGGGGTAAACAACCCC  
CACTGAGCCCTGCACCAGGCAGGGGCACAGCAGCTCCCCCAACTGCTAAC  
ACCTGAAAATCAGCACAGCAGGCCCTCCCCAGAACACCAGCTAGACTG  
ACTGACAACCTCCAGGGGAACCCAAGGGACTTAAAGTACACAGAATCAGA  
AGATACTCCCCTGTGGTTCTTTTTTTTTTTTTTTTTTTTTTTTTTTTGT  
TTTTTTTTTTTTTTTTTTTTTTTTTTTTTTTTTTTTTTTTTTTTTCTTCC  
CCCACCCCCTTTTTTTCTCCTTTCTTTTTCTTTCTTTTTCTTTCTTTTT  
TTTTTTCGTTTTTTTTTTCTTACCTTTTTTTTTTCTCTTTCTTTTTCTTTC  
CTTCTTTCTCTCCTCTCTTTTTTCTCTTTTTTCCCAATACAACTTGCTTTTG  
GCCACTCTGCACTGAGCAAAATGACTAGAAGGAAAACCTCACCTCAAAAG  
AAAGAATCAGAAACAGTCCTCTCTCCCACAGAGTTACAAAATCTGGATTA  
CAATTCAATGTCAGAAAGCCAATTCAGAAGCACTATTATACAGCTACTGG  
TGGCTCTAGAAAAAAGTATAAAAGGACTCAAGAGACTTCGTGACTGCAGAA  
TTTAGAGCTAATCAGGCAGAAAATTAAAAATCAATTGAATGAGATGCAATC  
CAAACTAGAAGTCCTAACGACGAGGGTTAACGAGGTGGAAGAACGAGTGA  
GTGACATAGAAGACAAGTTGATAGCAAAGAGGGAAACTGAGGAAAAAAGA  
GACAAACAATTAAAAGACCATGAAGATAGATTAAGGGAAATAAACGACAG  
CCTGAGGAAGAAAAACCTACGTTTAAATTGGGGTTCCCCGAGGGTGCCGAAA  
GGGACAGAGGGCCAGAATATGTATTTGAACAAATTCTAGCTGAAAACTTT  
CCTAATCTGGGAAGGGAAACAGGCATTCAGATCCAGGAAATAGAGAGATC  
CCCCCTAAAATCAATAAAAAACCGTTCAACACCTCGACATTTAATTGTGA  
AGCCTGCAAATTCCAAAGATAAGGAGAAGATCCTTAAAGCAGCAAGAGAC  
AAGAAATCCCTGACTTTTATGGGGAGGAGTATTAGGGTAACAGCAGACCT  
CTCCACAGAGACCTGGCAGGCCAGAAAGGGCTGGCAGGATATATTCAGGG  
TCCTAAATGAGAAGAACATGCAACCAAGAATACTTTATCCAGCAAGGCTC  
TCATTCAAAATGGAAGGAGAGATAAAGAGCTTCCAAGACAGGCAGCAACT  
TAAAGAATATGTGACCTCCAAACCAGCTCTGCAAGAAATTTTAAGGGGGA  
CTCTTAAATTTCCCCTTTAAGAAGAAGTTCAGTGGAACAGTCCACAAAAA  
CAAAGACTGAATAGATATCATGATGACACTAAACTCATATCTCTCAATAG  
TAACTCTGAATGTGAACGGGCTTAATGACCCCATCAAAAGGCGCAGGGTT  
TCAGACTGGATAAAAAAGCAGGACCCATCTATTTGCTGTCTACAAGAGAC  
TCATTTTAGACAGAAGGACACCTACAGCCTGAAAATAAAAGGTTGGAGAA  
CCATTTACCATTTCGAATGGTCCTCAAAAGAAAGCAGGGGTAGCCATCCTT  
ATATCAGATAAACTAAAATTTACCCCAAGACTGTAGTGAGAGATGAAGA  
GGGACACTATATCATACTTCAAGGATCTATTCAACAAGAGGACTTAACAA  
TCCTCAATATATATGTCTCCGAATGTGGGAGCTGCCAAATATATCAATCAA  
TTATTAACCAAAGTGAAGAAATACTTAGATAATAATACACTTATACTTGG  
TGACTTCAATCTAGCTCTTTCTATACTCGATAGGTCTTCTAAGCACAACA  
TCTCCAAAGAAACGAGAGCTTTAAATGATACACTGGACCAGATGGATTTT  
ACAGATATCTACAGAACTTTACATCCAAACTCAACTGAATACACATTCTT  
CTCAAGCGCACATGGAACCTTCTCCAGAATAGAACACATATTGGGTCACA  
AATCGGGTCTGAACCGATACCAAAAGATTGGGATTGTCCCCTGCGTATTC  
TCAGACCATAATGCCTTGAAATTAGAACTAAATCACAACAAGAAGTTTGG  
AAGGACCTCAAACACGTGGAGGTTAAGGACCATCCTGCTAAAAGATAAAA  
GGGTCAACCAGGAAATTAAGGAAGAATTAAAAAGATTGGAAGGAACTAAT  
GGAATGAGGATACAACCGTTCAAAATCTTTGGGATGCAGCAAAAGCAGT  
CCTAAGGGGGAAATACATCGCAATACAAGCATCCATTCAAAAACCTGGAAA  
GGACTCAAATACAAAAGCTAACCTTACACATAAAGGAGCGAGAGAAAAAA  
CAGCAAATAGATCCTATACCCAAGAGAAGAAGGGAGTTAATAAAGATTTCG  
AGCAGAACTCAACGAAATCGAGACCAGAAGAACTGTGGAACAGATCAACA  
GAACCAGGAGTTGGTTCTTTGAAAGAATTAACAAGATAGATAAACCATTA  
GCCAGCCTTATTAAAAAAGAGAGAGAAGACTCAAATTAATAAAATCAT  
GAATGAGAAAGGAGAGATCACTACCAACACCAAGGAAATACAAACGATTT  
TAAAAACATATTATGAACAGCTATACGCCAATAAATTAGGCAATCTAGAA

GAAATGGACGCATTCTCTGGAAAGCCACAACTACCAAACTGGAACAGGA  
AGAAATAGAAAACCTGAACAGGCCAATAACCAGGGAGGAAATTGAAGCAG  
TCATCAAAAACCTCCCAAGACACAAGAGTCCAGGGCCAGATGGCTTCCCA  
GGGGAATTTTATCAAACGTTTAAAGAAGAAACCATACCTATTCTCCTAAA  
GCTGTTTGGAAAGATAGAAAGAGATGGAGTACTTCCAAATTCGTTCTATG  
AGGCCAGCATCACCTTAATTCCAAAGCCAGACAAAGACCCCAACAAAAAG  
GAGAATTACAGACCAACATCCCTGATGAACATGGATGCAAAAATTCTCAA  
CAAGATACTGGCCAATAGGATCCAACAGTACATTAAGAAAATTATTACC  
ATGACCAAGTAGGATTTATCCCTGGGACACAAGGCTGGTTCAACACCCGT  
AAAACAATCAATGTGATTTCATCATATCAGCAAGAGAAAAACCAAGAACCA  
TATGATCCTCTCATTGGATGCAGAGAAAGCATTTGACAAAATACAGCATC  
CATTCTGATCAAACTCTTCGGAGTGTAGGGATAGAGGGAACATTCTCTC  
GACATCTTAAAAGCCATCTATGAAAAGCCACAGCAAAATATCATTCTCAA  
TGGGGAAGCACTGGGAGCCTTTCCCTAAGATCAGGAACAAGACAGGGAT  
GTCCACTCTCACCCTGCTGTTCAACATAGTACTGGAAGTCCTAGCCTCA  
GCAATCAGACAACAAAAAGACATTAAAGGCATTCAAATTTGGCAAAGAAGA  
AGTCAAACCTCTCCCTCTTCGCCGATGACATGATACTCTACATAGAAAACC  
CAAAAGTCTCCACCCCAAGATTGCTAGAACTCATAACAGCAATTTCGGTAGC  
GTGGCAGGATACAAAATCAATGCCCAGAAGTCAGTGGCATTCTCTATACAC  
TAACAATGAGACTGAAGAAAAGAGAAATTAAGGGGTCAATCCCATTACAA  
TTGCACCGAAAAGCATAAGATACCTAGGAATAAACCTCACCAAAGATGTA  
AAGGATCTATACCCTCAAACTATAGAACACTTTTGAAAAGAAATTGAGGA  
AGACACAAAGAGATGGAAAAATATTCATGCTCATGGATTGGCAGAATTA  
ATATTGTGAAAATGTCAATGTTACCCAGGGCAATATACACGTTTAATGCA  
ATCCCTATCAAAATACCATGGACTTTCTTCAGAGAGTTAGAACGAATTAT  
TTTAAGATTAGTGTGGAATCAGAAAAGACCCCGAATAGCCAGGGGAATTT  
TAAAAAAGAAAACCATATCTGGGGGCATCACAATGCCAGATTCCAGGTTG  
TACTACAAAGCTGTGGTCATCAAGACAGTGTGGTACTGGCACAAAAACAG  
ACACATAGATCAATGGAACAGAATAGAGAATCCAGAAGTGGACCCTGAAC  
TTTATGGGCAACTAATATTCGATAGAGGAGGAAAGACTATCCATTGGAAG  
AAAGACAGTCTCTTCAATAAATGGTGCTGGGAAAATTGGACATCCACATG  
CAGAAGAATGAACTAGACCACTCTCTTTCACCATACACAAAGATAAACT  
CAAAATGGATGAAAGATCTAAATGTGAGACAAGATTCCATCAAAATCCTA  
GAGAAGAACACAGGCAACACCCCTTTTTGAACTCGGCCATAGTAACTTCTT  
GCAAGATACATCCATGAAGGCAAAAGAAAACAAAAGCAAAAATGAACTATT  
GGGACTTTATCAAGATAAGAAGCTTTTGCACAGCAAAGGATACAGTCAAC  
AAAACCTCAAAGACAACCTACAGAATGGGAGAAGATATTTGCAAGTGACAT  
ATCAGATAAAGGGCTAGTTTCCAAGATCTATAAAGAACTTATTAACTCA  
ACACCAAAGAAACAAACAAGCCAATCATGAAATGGGCAAAAAGACATGAAC  
AGAAATCTCACAGAGGAAGACATAGACATGGCCAACATGCATATGAGAAA  
ATTCTCTGCATCACTTGCCATCAGGGAAATACAAATCAAAACCACAATGA  
GATACCACCTCACACCAGTGAGAATGGGGAAAATTAACAAGGCAGGAAAC  
AACAAATGTTGGAGAGGATGCGGAGAAAAGGGAACCCCTTTTACACTGTTG  
GTGGGAATGTGAACTGGTGCAGCCACTCTGGAAAACGTGTGGAGGTTCC  
TCAAACAGTTAAAAATAGACCTGCCCTACGACCCAACAATTGCACTGTTG  
GGGATTTACCCCAAAGATACAAATGCAATGAAACGCCGGGACACCTGCAC  
CCCGATGTTTCTAGCAGCAATGGCCACGATAGCCAACTGTGGAAGGAGC  
CTCGGTGTCCAACGAAAGATGAATGGATAAAGAAGCTGTGTTTATGTAT  
ACAATGGAATATTACTCAGCTATTAGAAATGACAAATACCCACCATTTCG  
TTCAACGTGGATGGAACCTGGAGGGTATTATGCTGAGTGAAGTAAGTCAGT  
CGGAGAAGGACAAACATTACATGTTCTCATTCAATTTGGGGAATATAAATA  
ATAGTGAAAGGGAATATAAGGGAAGGGAGAAGAAATGTGTGGGAAATATC  
AGAAAGGGAGACAGAACGTAAAGACTGCTAACTCTGGGAAACGAACTAGG  
GGTGGTAGAAGGGGAGGAGGGCGGGGGTGGGAGTGAATGGGTGACGGGC  
ACTGGGTGTTATTCTGTATGTTAGTAAATTGAACACCAATAAAAAATAAAA  
AATAAAAAAAGAAAGGATAGGCTGAGGGATCCCTGGGTGGCACAGC  
AGTTTAGCGCCTGCCTTTGGCCCAGGGCACGATCCTGGAGACCTGGAATA  
GAATCCCACATCCGGCTCCTGGTGCATGGAGCCTGCTTCTGCCTCCGCCT

ATGTCTCTGCCTCTTTCTCTCTCTCTCTCTGTGTGACTATCATAAATAAA  
TTTAAAAAAAAGAAGGAAAAAAGAAAAAGAACCTCAGTGCATGCTAAAAT  
TAGTGCATATGACCTTAGGTTTACGTGAGTAGAACTGATGATTATCTGCT  
TATCAGCAGTGTTAGCACTTTCAGTGCTTCATTCTACAGATGAATAAACCC  
TGAAGCCCCAAACAAGTTATTTAGTGACAAAACCTAGAATCAAAACCAAAGT  
CTACTGAATTTGAATCATTGTTTAATTAAAAAAATCAGATAAATGAGATT  
TAATGTTCTATATTAGACAAAATGTCTGCTTTGCATAGATTTCAAAGGA  
CATTATGACAAAACATGTCATTGGATGTTGAGCCTTTTACATTTTCATAT  
CTTTTCTCTAAAACCCCCAAACATAGGGATCCCTGGGTGGCGCCGCGGTTTA  
GCGCCTGCCTTTGGCCCAGGGCGCGATCCTGGAGATCCGGGATCGAATCC  
CACGTCGGGCTCCCGGTGCATGGAGCCTGCTTCTCCCTCTGCCTGTGTCT  
CTGCCCTCTCCCTCTCTCTCTGTGTGACTATCATAAATAAATAAAAAAATT  
AAAAATAAAAAATAAAAAATAAAACCCCCAAACATATGATTTAAATCTTTTT  
TTTAAAGATATTATTTATTTGAGAGACAGGAGAGAGAGCATGAGCAAGGT  
GTGGGAGGAGGTGGAGGAAGGGGCAGAGGAAGAGGGAGAGAGAGAAGTAG  
ACCCTCCACTGAGTAGGGAGCCTGACACAGGGCTTGATCCCAGGATCCTG  
AGATCATGACCTGTGCAAAGGCAGATGGCTAATCGACTGAGCCACGTAGG  
AGCCCCATAATCTTCTTTTTAACAAATAATGTATGAAACCACTATCTTCA  
TTCCATCTATGATAGTCACTTGGGGGTATTCTTGAATATCATAAATGAG  
GGATGAAGTAAGGTTTAGAGATGGTCTGAGAGTCTAATTGGTAAGTTTTT  
ATTGATGCTAACCATATGTTAACATAACCGTACATTAACATAAAAAGCTA  
AAAAAAAACCATAAAAAGCTTAAAAGGTAAGAGTCTTGATGGGAGTGG  
GGTATCAAAATAGAGTCAATATAAAAACCTGTCCTATTAATAACACGTC  
TGTGACTTTTATAAAATATGTCAAAATAATTTTAATAGTTAAAATATTGA  
TAATTCACGAATTAAAAAATATAATAAGGCCTAGTCATGGAAATCAAATT  
TAAATCACCGATGACTCATAACACATACTTTCCAGAATGACAGAAATTT  
AAAAAAAATGATTGCACTTTAGATAAAATTGGAGAAAATAGAATGGAAA  
TATAAATATGAGAAATCCTATCGTATTTTTGAGGATTAAAAGCTGGTTCA  
TGTATTCCTTAAATAGATAATGATGTATATCATATCACCTTGGAATTTAG  
ATTCTGTAGACAAAACGAAAAGAGTGGGGTTAGGGTGTTAAACAATTAAT  
ATTTACAATATACCAAAAATATATTCTATCCCACTCCTTAAGATTTTGAT  
GAAAACCTTACATGTATCAACACATCTACTTAAAAATGGGGGAGAGAATTC  
ATAGTTCCTTAAATATTATTTCAAGTGATACTGAAGCAAATAATTTTCATG  
GAGGCTAGCGCCCCACAAAGAACTCTGGCTAGAGGTAGCTTGTGAAATGT  
TGGCCCACTTTGAAATGCTGGCCTCCTTCTCGATTATGCCCTCAACAGCA  
ACTGTAACCCATCAGCTGCCTGTTTGAACCATGTGGACAGATGCCCATGA  
ATGCCGGAAGAGGCCTCCTTGGTATTTTATTGGCAATAACTCAAAGCTTA  
TTAAAGTCCAGATGGAGAGGGACCTGCAGCGTATTTAAGCCCATATGCC  
AATTGGGTTCTACACTATTTAATAGCTTGCATTCTTATCATGATTCCTTT  
CTCTTGCTCCTACTTTGATTTTCTCCAAAGTGTTTAGTATCTTGAAGTTGG  
TGTCTCCTCATGTATCTTTAAACCTGGTTCTAATGCCCATCTGTAAAGC  
ACTTAGGTTAAATTCTATGCATGATATTTTACTATTTTATATTGGTGT  
TAAATAAACATTGAACCATGAAGAGGCAATTGGGTGAGTCATTTATGACT  
CTTTGTATGTAGCTCTATTAAATTAAAAATGTCTGGTTTTTAATCCAATA  
ATATTTTCCTAAACACATTAAGGCTATTATGCACACATGGCATGCCATCT  
CTGTAAGATGAATTCGTCTTGTAAATATTGTGTCCATTAACTGATACC  
TAGAACTTACCTCATGCTAGTCAAGCTAGTAGTCTATTTATGGTTTTTAA  
AGGCATGAAATCAAAATAACTATAAATAAAAACAACCTCTATTTGTCTCAG  
TGGCCAGGAAGTGAACCTCATAATTCTATACATAGCCATTGGCCTTATT  
GTCTTCATCTGTTGCCCACTGACTCAATCCCAAATTTCTTAAGTTCTACT  
TCCTGTCTTAAATCTTTACAATAGTCCAGGGCTCTCCTTTCTCTTAATTC  
CTATTACATTTAAAGGGTCTGGCCACTCATTTTACACTTCATCTTGTACT  
GTCCAGAATTGTTATTTACCACCTTCCTGACTTTGTCTTCTCTCCACATT  
TATAAGCTTAAGGGGGGAAGTGATCGTGTCTGTTTCTGTATCCACA  
CCATGCTTATGTGTTCCGTGCCCTGCAAACCTTGTGTGAACATGTCCTAT  
TCAGTGGGTTTCCACAGCACAAAGATTCATTTCTAAAAATAGCTTATATTAT  
GCTGTATTGTAATTGTCCATTTATTACTCTGCAATGCTCATATGATGGCA  
TGTTTTTAAGAACAGAGCCCATGTGTGTGTTTAAAAGTTTGTTCATT

ATGATATCAGTAGGATTTAGATAGCCCCAGAGATGGAAATATGGGCCACA  
CTTGTTTCTCAGGCATATCCTAAGTGAAGGAACATAGGCAGCTATGGGAC  
TTTGGTAGATTTCTTTTCTCATTACAGACCAATTACTGAGTCTCCTTGA  
ATATGTCTCACTGCATTAATCTTCACTATGACCATTTGGAGAGTTTAGTC  
AGTAGGTAAAGTCTTCCTTGAGGCCTAGAGTGGAGAATAGTCTCTTTTGA  
ACTCAATTTTGAATTCTCATTTTCAATTTGTTTCTAATTCTGACATGGTAC  
TAATTGAAGATACATGTTAGAGAACTTCAGAACCTAAACGACTCACAAG  
AATGGGGTAATGAGAACACTGGCATTGAAAATGTAATAGAAAAGCTTACT  
GACCTAAAGGTCACGTTACCAAAATTTTGCCGAGAAAGAGAAAAAAATG  
TCTAAAATAGAGGTAACAAAGTCCTTGCACTAAACCCACAGAAAATTAAA  
AGTAAGCAGTTAAGAAAAACAAGAGAGGTAAGAGGGGAATTGCTAGACAC  
AAGCATACTGACCACAGTCAGGGATTATGACTAACTGCAATTGGGTTTCGC  
TAGACATGTAAGTTTTCTTTTCCCTAAGTGTGATAGAATTTTAAAGGCAC  
ATCGGTTCTCCCTACAGGGTAGCTATCATCTTTGCCTATAAGATCTTAGG  
TGGGTAAGGGGTGCACGTGTCCCAAGGAATTGGGACTATATGCTAATAGA  
TATCCCTCAGTTTCCCCCAAACCTCTATAACCAGGTGCTAAAAATTCAAA  
TTCATATGCTGAAGCCCTAATCTACAATGTAATGCTGTGTGAAGATGACA  
CCTTTGGGATAGTTAGGATAAGATGAAATCATGGTGGTGGGGACCTCATG  
ATGGGATTAGTGCTCCTTTAAGAAGAGACACCAGGTTCGGTCTCTCTCTCT  
CTCTCTCTGCCTTATGAAGACACACACACAAAATATAGTTTTCTGCAAGC  
TAGAAAGAGAGCTCTCATCAGACCCAACCATGCTAGTACCCTAATCTCAG  
ACTTCTGGCCTCCAGAACTATAAGAAAACAAATCTCTGTTAATTAGCCAC  
CCAGTCAATGCTATTTTATTATTGTAGTCCAAGCTAAGACAATGGGTGAC  
AATGGATAATGATGATCTATCTTCTATCTGTGTCTCTAAGTAATGAGATC  
CTTCTCTCGTTTCCAGAACTATTTCCCTTTATAGAGCTTACAACACTATG  
GTGCACACAAGGACTACATTTTAAATTCCTTTGAGGAAAAGAATCTTGG  
CATATTCATGTTTGCTTCTCTGCAGCAAGCACAGTGACAGAGCTTGATAG  
AGTTTTTACTGTGAAATATAACACTGACACAGAAAACCACACAGAACAAC  
TGTGTAGCTTAATGAATTATTAAGACAAGCTTTCTTCTCCCTTATTA  
CCTTACAATTTATTGCTAAAGAAATCAGATCTTTGGACCCTATACTTCTC  
CACAGTCCTGATTTTGCATGTCCCTTTGCATTTCCCAAACATTGGTGGTT  
GGGTTTATAGTCTTGATCAGATCCTGGTTTGATGATTTGGGCAATGCTAC  
TTCATTGGTGATGTGGTTATTCATCAGGGCAGGAGAGTCACAATGCTGGT  
TGTTTCGCTCTCAATTTCTCTCTCTCTCTTTTTTTCTAGTTGTCCTCTTTT  
ACAAGACTTTTTTAGAGAGACTCAGTGGAGCTGCTCTGAGAATTTTTATTT  
ATGTATTTTTAAATTTTTAAAAAGATTTTATTTATTCATGAGAGACACA  
CAGAGAGAGGCAGAAACATAGTTAGAGAGAGAAGCAGGCTGCATCCAGGG  
AGCCCAATGTGGGACTCGATCCAGGGACTCCAGGATCATGCCCTGGGCCA  
AAGGCAGACACTCAACCCCTGAACTACCCAGGCATCCCTACTCTGAAAAT  
TTTTAAAGTGAAAGCCACTTTGGTTCGTCCTTTGAAGATCCAGCCTGGTC  
ATAACTGTAAAAAGTAATTTGTCGTTTCTAGTTTGAACTATTGCAAATA  
GTGCTGCTATGAAAAATTCTGTACGTGTCTTTGGGGGACATGTGGGCT  
TTTTCTGTTTTTTATTTTATTTTATTTTATTTTATTTTATTTTATTTTA  
TTTTATTTTATTTTATTTTATTTAAATTCAAGTTACTTAACATGTAGTGTA  
TTACTAGTTTCAGGGGTAGAATTTAGTGATTTCATCTGTTGCATATAACAC  
CCCGTGTTATATGAGCTCATATGAGCTCACATCAGGGCTCATTATGTCAA  
GTGCCCTCTTAAATGCCCATCATCCAATTACTCCACTCCCCTTTCTCCTC  
CCCTCTAACAACCATCAGTTTGTTCCTACAGTGAAGAGTCTCTTAAGGT  
TTGCCTCTCTGTTTTTTATCTTATTTGTCTTCCCTTCCCTATATTCATC  
TGTTTTTTTTCTTAAATTCACATATGAGTGAAACCATATGTTATTCATC  
ATTCTCTGACTTATTTCTCTTAGCATAATATCCTCTAGCTTCATCCATGT  
TGTTACAAATGGCAAGATTTCAATTTTGGATGGCTGAGTAATATTCCA  
CTGTGTATAGGCACCACTTTTATTCACCCATCAGTGGACATCTGGGAT  
CTTTCCATATTCAAGTATTGTGGACATTGCTGCTATAAACATTGGGGTGC  
TTGTGCCCTTTGAATCACTATTTTGTATCCTTTGTATAAATACCTAGG  
AGTGCAAATCCTGGGTCATACAGTAGTTCTATTTTTAACTTTTTGAGGAA  
CCTCCATATTGTTTTCCAGAGTTGCTGCACCAGTTGGCATTTCCACTAAC  
AGTGTAAGGGTTCATTCATCATTTCTCTCCATCCTCATCAACATCTGTT

GTTTCCGGAGTGGTTTAAATTTTAGCCATTCTGACCAGTGTGAGATGGCAT  
CTCATTGTGGTTTTGATTTGTATCTCCCTGATGATGAGTGATGTTGAACA  
TTTTTTTTCATATGGTAGCCATTTATCGTCTTTGGAGAAATGGACACGTCT  
TCTGCCCATTTGTTGAATGGATTTTTTTGTTTTTTGAGGTGTTGAGTTTG  
ATAAGTTATTTATAACTTTTGGATAGTAGCCCTTTATCTCATATGTCATT  
TGCAAATATCTTCTCCCATTCATAGGTCACCTTTTAGTTTTGTTGATTG  
TTTCCTTTGCTGTGCAAAAGCTTTTTATCTTGATGAAGTCCCAATAGTTC  
ATGTTTGCTTTTTGTTTCCCTTGCCTCTAGGGACGTGTCTAGTAAGAAGCT  
GCTGTGGCCAAAGTCAAAGAGGTTGTTGCCTGTGTTCTCCTCTAGGATTT  
TAATGGATTCCCTGTCTTACATTTAGGTCTTTCATCCATTTTTAAATTTAT  
TTTTGTGTATAGTGCAAGAAGCTGATCCAGTTTCATTCTTTTGCACATGT  
CTATCTAATTTTTCCCAACACTATTTGTTGAAAAGACTTTTTTCCCTTGGA  
TATTTTTTCCCTGCTTTGTTGAAGATGAGTTGACCATATACTTGAGGGTCC  
ATTTCTGGGTTCTGTATTCTGTTCCATTGATCTATGGGTCTGTTTTTTTT  
GCCAGTACCATACTGTCTTGATGATTACAGCTTCAGAATACAGCTTGAAG  
TCTGGAATGGTGGCACCTCCAGCTTTGTTTTTCTTTTTCAACATTCCTTT  
GGCTATTCAGGGTCCCTTTCTGGTTCCTACAAATTTTAGAATTGTTTGTT  
CCAGCTCTGTAAAAATGCTGGTGTTATTTTGATAGGGATTGCATTGAATG  
TGTAGATTGCTTTGGGCAGTTTAGACATTTTAATAATATTTGTTCTTCCA  
ACCCATGATCGTGGAATGTTTTTCCATTTCTTTGTGTCTTCTTCAATTTT  
TTTCATAAGTGTTCTATAGTTTTTCAGAGTACAGATCTTTTGACTCTTTGG  
TAAGGTTTATTCCTGGGTATCTTACGGTTTTTAGTGCAGTTGTAAATGGG  
GACAGTTCCTTGATTTGTCTTCTGCTTCATTGCTAGTGTATAGAAATGCA  
ACAGACTTCTGTGCATTGATTTTATATCCTGTGATTTTACTGAATTCCTG  
TACCAGTTCCTGGCAATTTTTTGGTGGAGTCTTTTAAGTTTTCTACATAG  
AGTATCCTATTGTCTGCAGAGTTAAAGTTCGACTTCTTTGATGATTTGGA  
TGCGTTTTATTTCTTTTTGTTGTCTGATTACTGAAGCTAGGACTTCCAGT  
ACTATGTTGAACAACAGTGGTGAGAGTGGACATCCCTGCTGTGTTCCCTGA  
CCTTAGGGGAAAGGCTCTCAGTTTTTCCCCATTAAGGATGATGTTAGCTG  
TGGCTCTTTCATATGCAGCCTTTATGATGTTGATGTGTGTTCCCTCTATC  
CCTACTTTGTTGAGAATTTTTATGAAGAAAGAATGTTCTGTTTTGTCAA  
TGCTTTTTCTGTGTCTATTGAAAGGATCATATGGTTCTTATCCTTTCTTT  
TATTAATGTGGTGTATCATGTTGATTGATTTGCAGATGTTGAACCATACT  
GGCAGCCCAGGAATAAATCCCACTTGGTCCCTGGTAAATAATCCTTTTAA  
ATACTATTGGATCCAGTAAATACTATTGGCTAGTATTTGTGGAGAACTT  
TTGCATCCATGTTTCATCAGCAATATTGGTCTGTAATCTCCTTTGTAGTG  
GGGTGTTTGGTTTTAAGATCAGGGTAATGCTGGCCTCATAGAATGCATTT  
AGAAATTTTCCCTCCATTTATATTTTTTGGAACAGTTTCAGAAGCATAGG  
TATCAATTCTTCTTTAAATGTTTGGTAGAGTTCCCCTGGGAAGCCATCTG  
GCTCTGGACTCTTGGTTTTTGAAGATTTTTGATTATGGATTCAATTTCT  
TTTCTGGTTATGGGTCTGTTCAGACTTTCTATTTCTTCTGTTTCACTTT  
TGGTAGTTTATAGGCTTCAGGAATTTATCCATTTCTTCCACATTGCCTA  
GTTTTTGGAAATATGATTGCTCATAATATTCTCTTATAAATTGTATTTCTG  
CAATGTTGGTTGTGATCTCTTTCATTCATGCTTTATTTATTTGGGTTCTT  
TCTCTCTTCTTTTTGATAAGTCTGGCTAGGGTTTTACTAATCTTATTAAT  
TCTTTCAGAGACCCAGTTCCTAGTTTTGTTGACCTGTTCTACTGTCTTTT  
TTTTTTTTTCTATATCATTGATTTCTGCTCTAATCTTTACTATTTCTTT  
TCTCCTGCTGGGTTTAGGCTTTATTTGCTGTTCTTTTTTCCAGCTCCTTTA  
GGTGTGAGGTTAGGTTGTATATTTGAGACTACTTTTGCTTCTTGAGGAAG  
GCTTGATTCTGATACACTCTTAGGCCTGCCTTTGCTGCATCCCAAAGGT  
ATTGGACTCTTGTGCTTGCATTTTTGTTGTTGTTGTTTCCATGTATTTTT  
TAAATCTTTTTTTTTTTTTTTTATTTCCCTGATTGACCCATTCAGTCTTC  
TGTAGGATGTTCTTTTACTTCCATGTATTTATGGTCCCTCCAAAATTTTT  
CTTGTTGGTTGACTTCAAGATTCATAGCATTGTGGTCTGAAAATATGCATA  
GTATGATCTCAATCTTTTTGTACCGGTGGAGTCCTGATTAGTGACCCAGT  
ATGTGACCTATTCTGGAAAATATTCATTTGCACTGGAAAAGGGTATGTA  
TTCTGCTGCTTTAGAATGAGATGGTCTGAATATATCTGTGAAGTCCTTCT  
GGTCCAGTGTATCAGTAAAAGCCCTTGTTGCCTTGTTGATCTGCTTAGAT

TATCTGTCCATTGTTGTAAATAGGGTATTAAAGTCCCCAACTATTATTGT  
TTCATTACCATTGAGTTTAAAGTTTGTATTATATATATATGTATACACA  
CACACACACACATACACACACACACACTTGGTTGCTTCCAAGTTAAGG  
GCATAAGTATTTACAATTGTTAGATCTTATTGGATAGACCCCTTTATTAT  
ATTTTCTTTCTTCATCTCTTATTTTCAGTCTTTGTTTTAAATCTAGTTTT  
TCTGATAGAAGTATGTTTTTCTGAAAGTTTTTCTGAAAGAAAGCCCCTCT  
AGCTTTCCTTTGATGTCCATTAGCATGATAAATGGCTCTCCACCCCTCA  
CTTCAATCTGGAGGTGACTTTGGGTCTAAAATGAGTCCCTTATAAGCAG  
CATATTGATGGGTCTGGTTTTTAAATCCACTTTGATACCCTATGTCTTTT  
GATTGAAGAACTTACATTCAGAGTAATCATTGAAAGATAGGAATTTAGTG  
CCATTGCATTACCTATAAAGTTCCTGTTCTGTAGATCGGGGAACATGTG  
TTTGTATTTGTGTTTTATGTGTCTGTGGTGAAATCACTGGATCATATGGT  
ATGCTCATGAGATGCTTACTACCAAAGAGTTTTTCAGTGTGGTTTCACCA  
ATTCGTATGCTTAAAGCAGTGTATGATTCCCTGCCAGCTGTTCAAATCAT  
AACCAATAGTGGGTATTGAATCTTTTTTTTTTTAAATTTTACACATTCCAG  
TGGGCATGCAGTGGTATCTCCTTTGGACATCAATTTCTATATCCCTCATG  
GCTAATGAAATTAACATACCTTCATATGTGCGATCACCATTTAACATCC  
TCTTTGGTGAAGTGCCTATTCCAGGCTCTTACCCATTTTGCTCTTGCTT  
CTTGGTCTTGTCTTTATTGATTTCTAGGAGTATTTTATAATTTCTTCCCC  
ATTCCAAATCATGTGCAGACATATTGTCTAGAGGTCAAGAGAGATTATAG  
GGAATAAGATTAAATGGCAGAACATGAATGCACACTATCATACAAACACA  
TAGAGATTTCTGAAATTTTCAGTATGATCTCCAATTTATACCAAAGTTCAT  
AAGGAGACAAAAAGCTCAAATAGCATGTAAAGTCTGTAATCATAGGTC  
AATGTCCAAATAAACTAATCTAAAATTAATAATCTTATGCTCAATCA  
GCCAAAGGTTTACTTTGTTAGGAGGATAAAGTAGAGGCCCTCTCCACCTCA  
GGTGGGTACCATTCTTTCTTTTCAGTGCTTCAGATGCTGGTTTACTTTAA  
TAATGCTCTGAGTTCACAGAGGAGTTTCCAGGGCACCAACTGCAATCTCA  
TAAAAATGTAGAAAACAACCTCACCTGCAGCCTCAGAGCAGTCAGTGCAAT  
GATATACCAAATGGTATTTTCATCAGACTCCTGTTCATCCAATGCCAAAGA  
AGAGACTCTAGAGCTAGGTACATAGAAAAAATTTCTGGTTGTCCAGGATG  
TACCAAGATGCAGCCTGATGGTGACAGTTGTCTCATTTTCAGAGTTGAAA  
TTAAACCCTGCTGGGAGAAATCTCCCATTCTTCTGTTAATTATGACACTA  
TATATAATATGTGTGTGGGAAAGGTGATAAAAAATTAGTCGATGCATACT  
ATTTCCCTTGCCTAGAGGAGCAGTTATGTAAATAATATGGCTCAGATTTA  
ACAGGTGGCAGACACTAAATATCTTGTATATGTCTGCTAATGGCCCTTTA  
AGGAAGGTGGTTGTGTTAGTCCAGGCTCTCCAAAGAAATAGAACCAATAG  
GATATACAGACATAGATGAGAGAAGATTCATTATAGGAATTGGGCCATGA  
AATTATGAAGGCTGAGAAGACCCAAGATAGGCAATCTGCAAGCTAGAGAA  
CTAGGAAAGCCAGTGGTATAATTCAGCCTAAGAACTGGGGGCAGGGGTGG  
GGGATAAGAAGGGGGTTGCTGGTGTAAGTCTTCTTCTCAAAGTCTAAAGG  
CCCAAGGTCTGAGGACAGCAGAAAAGGGGGTTCCAGCTCAAGAAGATAGA  
GAATTCGCCTTTCTTCTTTTTTTTTTTTTTTTTCTTTCCTGTTCAACCCCT  
TGAGGGATGATGATGCCACCTACATTGGGGAAGGCCATCTGCCTTATTC  
AATTTACTAATTGCAAGGCTAATCAGTTCTGGAAATACTCTCACTGACAT  
ACCCAGAAATGTTTTCCAGCTATCTGGGCATCCCTTAGCCAAGTGAGCTT  
AACATATAAAATTAATTATCACAGTACTACTCTGATTATCAACCCTGTCT  
TACGAATATGAACATTGAAGTGCAGATTGTTTAAGAACTCACTCAAGGC  
TACAAAGCTGGTTGGCAGGTGACAGTTTTTATACTGAAGTTACCTTTTTCC  
ACTTTGCTTCTAAGCTCTCTTTCTGGTGCCCTGGTGCTGCAGTGTGTGTT  
GTCTCTCTGGGGACCCAGGATTTGTTTCCTCCCAGGAGCAGGCATTTTTTA  
GATCTGTGTACATTATCTGTGTTCCACATTTGTCTGTGTATATTCAAG  
CCCATGAAACATACCTCAAAGCAAATTGGAGGAAAGGCTTTTTCTCACTG  
TATCCCTCATTTGGCTAAAGAACAATTACCCTCATGGATTCCCTAAAGCCA  
GGCAGCTGGGGATGTATCTGCAGCTTTCATCCCTAGAGCCTGTTGAGGAC  
CAATATTCCTGGCATGAGCATTGTAAAACATTGGCTGTCTCACCTTTTG  
AATATTCTGGGCCCTGAAAGCATGTCTTCCTGCTATGTGTTTTCTCTGTG  
AAGGTAGTTTATATTCTCTATTTAATAATGATCTAGCATAATAGAAGTT  
GCTTCTTCTAAACTCATCCTTTCTCCGTGGGGAGCTCTTAGTAAAAAGTG

GAGAGCGGCCAAGATATATAAAATTTCCCTTGTAaaaaATACATAAAATAAA  
TATCAAGAAAGACACAAATACACACATTGGTTAAGATCCCAATCCCAAAT  
GCCAAAAAGAAATCAGGTGGGTAGCTAGAAGGTGATGACAGGCTGAAGGT  
TTTTGTTGTAGGTATTAATAACAGAAAAGTATCAACTGTAAAAGCAAAT  
CAGTTGACCCAGGAAGTTTCATACAACTGAGAGTAGAGAAAATTGGCAAA  
GTAAAGTTACCTGGGATGTTAGAGGTGAACAGGATATCAGGCATAGTGAA  
CTCAGCTCTTCCATTTGCCAAGGGGAAGAAAGGAATGATGATGGCATAGG  
GCAGATCCAATGTAATCAAGTTTACATAGTAGATGGAGCAGAGATGAAAG  
ATTTCCATCTTAAGACTTCTAGTTTGGGTAGTAGCAGGTGAGATCCTCTA  
CCCAGGGAAGAGGACTAGGGGGCAGGGCTTGCAGATTTGGGAAGCATCAC  
ACAGTTAAAAAATAATCCACTTCAATTCAAACAAAGTTAGTTAACCAGA  
GAAACCTAGGTAGAATTTATCATGAAAACTAGAGAATTATAGCCTGCAT  
GTAGAACATGTAAAACGTTATATAGCTTGTGCCCAATACTTGATTGAGTT  
TTAATTAACCTTTCTTATATTGCTAGTTTTCAATGTGTTATCTCTCAGTTC  
TTAACCTTTTCAGTGCCATCTTATGCTTCTTTGATAGCAGATGTTGGGAGC  
TCTATTAGGAGATCATTTTTGAATGTCAAATCCTGTGTGTCAATAGACCT  
AATTACCTTACAGAAAAGCAAGCAACCATCTGTGTAAGCCAGCCAGCAAG  
AAAGTGCTCCCTCCTCTGGCTGAAAATCTTCTCCTTACCTTCTTTGGCTC  
TTATAGTCCATTTTCAGTTGAAGAGAGAATCTACCCTTTATACCTGGGATA  
TGATTTATAACTTTGTGTTTCACTGGTCTGTTTTAATCTGAGATTCCGTA  
TTTCTGTTATAGCCAAGTGGTGGTTATTACCCAGCTCCTGGGCAAGCCTC  
AGCTTAGTTCTGAATAATGGTTGTTCAAGAACAATACAGAGAAACAGTAG  
AGGCAGGGGATCTACCTTTCTGCTGCTTGCCTTGTCCCTCTAGGACAAGG  
AGTAGGTCCAAAGGACCAAGAGCTGAAAGTAACCACAACCTTCCCACCCC  
ATAGGCAGTGTCCGCTGTCCATATCTAATAGATATAATGAGCTCTCACCC  
AGGCCTGTGCTTTCTAAGTGTTCAGGCTGCTCTCCTTTTAAGGGGAAGTT  
GGGGAGAGGATGAGGCTAGGGTGGGGGAAGGAAGAAAAATCCTGTTGTGT  
CCATCAACAGGTGAAGCCTAAAAATTTCACTGGAAAAAGTTATGGAAGAA  
GTAACAGCTGCAGGCCTGTTTGGAGCAAGTCAGCAGAGTAGTTTCCATCT  
GGCATCTGTTTCATCTGCAGAAGAATTTTTTTTTTCTTTTTTAATAAAGG  
CTTGAGCTGAAGGCCACTTTATTTAGGAGATGTTAAGTCCCAGGATACC  
AATGGCTTTGCAAGCTGCCAGCATAACCTCCTCATCCCCTTCTTACACA  
CCTCCCACCAGCCTGTCATGGTCTTGCTCAGTGAAAAAAGAACATCCA  
GAGATTTAAATAGCTCTAGTGCAAGGTGAAAACCTTCAAGCCACACAGAA  
GTGTCAGCGAGCAGTGAATCGGACTGGATGGGAAAGGTGCAAAAGTTTAC  
CTTTATAGTTAACGTATAGGGTCAGGTGCATAGTAGATATTCAATAAGCT  
TCTGTGTTTTGGAAAAAGTAAAAAAAAAAAAACAAAAAAACCCAACAAGC  
TCTTTGTTTTGTATGACTAGGAGGAAAGAAACAAGTCCTTCTGCAAACT  
TAAAAATACTTTCTGGGGCCTCAGGGTCATGTTGTTCTCAATGTGAAAAG  
TGATAGAACAGCGTATTGGATGATCTCTTTAAGAAAGGGTTTTACATAAG  
AATAACCTGGTTTTCAAAATTTAATATATAGAAGCGAAATCCAATCTTGAT  
ACAATCAGGGTTAAGTAATCATCACAAAAGCAATCATCACAGAACAAGG  
ATGCCCTTAAAGAATTTGGGTCTCTGTAGAAACGTTTACTACCTTATACT  
TTTCAGAAATCAATGGAAGGCAAGAAATATCTCAAGAACTTAGATAAAACA  
GAAGGAAAGTAGATAACCCCCCCCCCTTTTTTTTTTACAAATGTGAACATATG  
TTTATGGTTCCTTGAATTGACCCTGAAATTTCTTTTTTCATTTAATATCTGA  
GATAGCACAAATGATAAATGCCTTACTGGATCTTGGTTAGGCATAGGTAAT  
CTTTATTGTTGCTAACAACGAGAAGAGAGAAGAAGAAATAAGGCAGATGA  
CAGATAGCCAAAGGGTAAGGGTAATCAGAGATAAAACTCCCATCGGATAT  
GATATGGTGATATTTTATTGACTTAGAATCTTCAAAATCCCCTATTCTTGA  
AAAATGATGACTGTTTTGCAGTCATTCTGAACAGGATTCTCTATACTAAG  
GGTATTACAGATAGAATTTCCACATTCTTTCTCTACCTATAATATATTT  
ATACTATAAGCAGGTCAAACCTTTAGCCCCCTTCCATTAGGATTTTCAAACC  
AAGCTGTCTCATAGCTTTGATCAGGGAAAAAAATTGAATCTAGCCTGAAC  
TTCTTCTAAATGTAAAGATTGTCCTCCTAGCTTTGCTGGGATCCTAACAC  
AGGGTCAGTGAGCAAGATAGAGGAAGAAGAAAAATTAATGGCCAGTAATT  
ATTTTATTTCAGTACTTAAGGTTCTACAACAGGCTCCAAATGATGATGATA  
AATGTCAGATAGAAATCTATTTTTTCAGAATTCCTCTCGGGAAGAATATTA

TGTTTGTTTAGAAAATGTGTTTTGATAAGTTGTCTAGAGCTATGACTAAG  
ACTGCAATTGCATATTAAAGTGAAAAAAAAAAAAACAGCTGAGAAATAGTC  
AAAGGAGAGTGATGATCTTCCCTCTGTTTGCGTGGTTGCCATATTCTCTG  
GGGCAGAGTCTTGCTTCATGCATAGGCAACCCCCAGGGGTTTGTAAAAC  
ATACATTTGGTCCAGTATGGCTGTGGTACAGCTCAGAGTCCTGGGGTCGA  
TAAAGCACCCAGATGATGCCCAAGCTGCTAGCCCAAGGGCACTGAATAGC  
CACTTTGTAGAAAGCACTGATTAAATTTTCTCTGCACATTTTGGGGTAGA  
CATTGGAAGAGCATGAATTATCCTGTGTAACGGAAGACCTATTCTGCATA  
CTAGAAAAGCTAGAGAGATTTGGGGCAAGCCCACCAGAGCGGAATCACTG  
AAGAGGCTCAGTGGGGCAGCATTAGGTTACTAAGAATGTTTACTTAAGCT  
GTTGCTCTCAGGGATGCAATGGAAAATCCTCTTCCGGTTGCTCATAAAAC  
ATATTCAATTAAAGGTCCACAGCAAACTAAGAGGTTCTCAGTTTTGCAT  
TCAGGTAGGCCTGGGAGAAAACCAAGGATAAAAGAGCAGGAAGCTAAGGAG  
CCCAGTGACACCTGAATGCCCAAACCAAAAGGGATAATTGCCAGCCATAA  
GCATATTTATCTGTGTGTCAGCCACCTAAGTTCTTTGCATGTTCTTCTATTA  
CTATCGTCTTTTTCAATACAAGAAGACCTAAGACCCCTGCTTTCAAACCC  
TCACCTACAAAGCCCAAGACTACATACAATCATCCAGGAGCTGAAAAAA  
ATGTCTTTTTCTTTAGAAAAAAAATTATTTTATTTACATTCAGTTAATT  
AACATATAATAGGTGATTATTTTCATTTTCAACCTGAAGGAGGGAAAACC  
AATCTCTCTCTGCATCCCTCTTTCTCTATGTTTTTCTATCTCCACCCCCA  
CCTAATAATTTATGAGGAGAGTAAGCATTCCTGAGAGCTGTTTTGTTTTT  
TTTAAATTTTATTTATTTATTCATGAGAAACCCAGAGACACAGGCAGAGG  
GAGAAGCAGGCTCCATGCGGGGAGCACCACGCAGGACTCGATCCTGGATC  
CCCAGGATCACGCCCTGGGCTGAAGGCAGCACTAAACCACTGAGCCACCC  
GGGCTGCCCTGAGAACTGTTTTTAAATTTATATTCCCTCACCTTTTATAA  
CATCTTGAAATCTTCCCCTTGTTTACAGTCACACCTCTCACTGCATTAA  
CACACCTTCATTCTGTAACTCCTACTTTGAGTGAGTCATCAGGCTTTTA  
AGGTGAAGTAAATTAAAGTGATCACAAAGGAATTATAGCAGGGTTTTTTT  
TTTTTTCTAGAGGAATTTCCCTTTATAAAAAATTATACCTACCGCTCAGC  
AGAAGAAAGAGAATATGACCAAGAGCTTTGAAGTTCTTGAGTATCCTTCT  
CTGAAAGGTAAGTGCTACCCTGGAATTTTGTATTCAATTGGTCTCTTGCTT  
TCCTTTTAGCCTGCAAATAAATGTGTGTGTCCCTAAAATAGGTGTTTTGC  
ATTCTTTGTTTAGCATGTATCATGTTAAATGTTTTCTCCTGTAGTTTGTT  
TCCAATCAATATTCTGTTTGCGAGAGTCACTGATGCAGAGTAGGACGTTG  
CAATCCATTCATTTTTTCAACACTGGTATTTTTTTCAAGACATGGTGGGAC  
AGGATGTGAGACTGGTTTTCTGGTTGTTTCGCTTTTTCTTTACTATTATT  
AAAAATGTTTTTCCTTAAATCCAGGAGTCCCACAACCTATTTTCTCTCTAC  
TCACCATATTTTATCTATTCCCACCTTACTTTAGGTCAGAAGTTCTTATC  
CATGGCTGCTTATTAATAATCACCTGGGAAAGATTTTAAACCTCCTGATGT  
CCACATTGTGCTCTGGGCAAACTGCAACAGAATCTCTGGGGGTGGGACTC  
AGGTATTAGCATTCCGCAAGGTTCTTCAGGTGCTACCAACGTGCATGCAG  
ACAAGTTTTTGTTTGTTTATTTATTTTTTAAAGATTTTGTTTATTTATTC  
ATGAGAGACATAGAGAGAGAGAGGCGAGAGACACAGGCAGAGGGAGAAGCA  
GGCTCCATGCAGGGAGCCCGACGTGGGACTCGATCCAGGGACTCCAGGAT  
CACACCCTGGGTGCTTTAACCCTGAGCCACCCAGGCTGTCCAGACAAG  
TTTTTGTTACATTGCTTTTCGTTCTGCCTCATTTGAAAGGAAAAAATGTTTT  
ACTGGTTCCAGCTAAATGATCCATCACAATCCAGAAATCCATCCTCACTAGCC  
TTTTTTTTAAGCTTGATGGCTTGCCCATCCATCTACTCATGTCAACTGTG  
CCCAATTTTGGACATTGGTTTAGTAGAGTCTAAACAATGCCTGTTGGAGAAA  
TATTAACATTATCATGGTTCACTCTGGGTAACTTTGCAAGGCCAAGCCCTT  
GTTTACCCTTAACCCAAAGGTTAAGACCCAAAATTTGACCCATTCTTTTA  
AAAAATCCACATCATAAAAACAAAACAAAATACAGCTTTTTGTTCTGAAGT  
CAATAATTATTAACCTAGAGTCACATGATCTGCCCTGATCCTTTTCTGG  
GAAATATGTTCTTTTGGCCACTATCCATTTCTTTAAGCAGAACCCTTGGT  
AGAGGATGAGTCAATAGGGTACATGGTGACTCAGGCTCTAAGTAAAACAG  
AATGAATTGATTTAATGCCTTGAGAAGTAGCTTGTTACCCAATTATGCAA  
AATGTAACCTGATATCCAAGAAAGCCATCATCTAGCAGGATCTATGAGCT

GGGAGTAAACTCCTCATTACCCCAATGGGAAAATATTAGATAGAGAGCTA  
TTATTCATTCTTTAGAGAGCTTGATAATAACAACCTCAGAGGTGACTTGAA  
ACAGTAAGCAACTAATACTCTAAGAGCAGAGCACAGTAAAATAAATCTGC  
TAGCTATGTCTGGTGTGTTGGGCGGGGGTTCGTTAATGTTCTTTGTCAACC  
ATGTCATGTATTTTCCCTGAAGGGTGCTACTACTGGTGTTAACAATTACT  
CTCAACCTTCCATCTATCTCAAACCTTTTTTTTTTTTTTAATTCCAAGCCA  
ATTTTGTA AAAAGTCAATTTTATATTCACCTATTTCTCCTTTTTTGTTT  
CAAATTTTTTTTTTTAGATTTTATTTATTTAGTCATAAGAGACACACACA  
GAGAGGCAGAGACAGGTAGGTAGAGGGAGAAGCAGGCACTCCATGGGGAG  
CCTGATGCAGGACTCGATCCCAGGACCCCAGGGTCACGACCTGAGCCAAG  
GCAGATGCTCAACCACAGAGCCATCCAGGTGCCCCCTGTTGCAAATTTTT  
ATTTAAATTCTAGTTAACAGATAGTGTAATAATGGTTTCAGGAGTAGAAT  
TTAGTGATTTCATCACTTATAACACCTGGTGCCCATCACAAACAGGCTCCCT  
CCTTAATATTCATCTTCTAAGAATAAAAAATTGAGGGGAAAAGAACTTG  
GAAAAATACAAGACTTAAATAATATCTACACAGCTCTCTTATGGTTATGG  
GAAGTTTACAGAACATTTAGGTCATGCTGAACCTAATACCTAGTCTAGGA  
GCTTATTCAGGCAACACTTTTTAATGCCGTTGATGTTATTTAGTGATAAT  
GAAATAGTAGTCTGACTTCTTTCTTGCCCAAGTGATTGTGGTTTTGCCC  
TTCAAATTCCTAAGATACGGACCTTTCAGAGACTGGAGAATGGATTCT  
TACTAAAATTTTCTAATTTCTGCAATCAAATGGCATGTTGCCCTTGCCCT  
ATTTTCTTTGTAAGTCTACTTGTATTATCAGAACTTAAATAAGCCTAGA  
TTAAAGGTAGGTTTTATGGGCATACGTAACTTCTTGATAGATGAGTTT  
TGAGCCATTTTACACACTCCGAAATGTTTCAGTTGTTGATGATTCTGTATT  
GGCAATAAAGAAGAAGAAAAAGAAAAATCACTTAGAAGCAGTAAAGCCAA  
AGGTTTTTGGTAATTAGTTTCCATCACAGGGAAATAAAGAAGCAAATAAT  
CAGATTGATTATAAATTTTGTTAGTTACAAGTTACATTGCTAGGGGAGTG  
GGTTTTCTTCTTTTACATCTGAATGCCTCAGAACTTTTATAAAAGATCTG  
GTATCAGAGCCACACTTGGGTGAAGAATAGTAGGAAAAAGTTAGATGGA  
TAATATTCACATGTTTTAAATATTGAAGAGATGATATAAATTTATGTTAT  
TTATTAAGATTCAATTTATCTACAAGGGAGGTGAAGAATTTTTTCTAATG  
AACATAAGAGGGGGCATAGTAGAAGAGAAAGAAACGTTGAAATAAAGATA  
TCAGAAAAGGACAGTTCCCTACTGACTAATTTTTCTTTATTTAAAAAATT  
ATATTTGTCTCTATTTCTTTACATGTAGCTTCTAGTTAAAATTTTTGGTG  
TTGGAGCATGAAGAATATTTACCCCTCTTGAGGTTTATTTTTGTTTTGT  
TTTGTGTTTTGTTTTGTTTTGTTTGTGTTTTGTAAATATTAAGACTAA  
AGCAACCCCTACCCATATTTTTATCTGGAGGTGTTAGCATTTAACTTTA  
ACAGTGGACATGATTTCTATGCAAGAATAAGCAGAAATCCATGCTTATAT  
TCAGAGTTTCCACTTAATTTCTCTGGGTATCTGCCTCTCTGTTGCCATGC  
AGTAGGATTATGATCACAGAATGCCCCAAATTATGCAATAACTTACATTC  
TTGTAATAACGTTTTTACTGACTACATGAATGCCATGTGATCTATTAATGG  
GAAGATTAATAGTAAGCGTATTATTACAGAATTTGGTTTATATTTTGAGA  
TTAGCCATTGATCGTTACATGTTTTTACTGACGTGGTTAATGGCAGAAG  
ACGTACAATAAATTGTATTAAATCAGATTACTATTCTATTGCTTTTGGCC  
ATCTAGCTTAGTTGAATAGGAAAAATATACGCTGAGTATAGGGTTGCAGGT  
TCAATCCAGGTGTACCTCTCACCCCTGCTGGATGTTTCTCAGATGCAATC  
TTTGTTTTCCAAAGAGAGAATCCAAGGGAGAGGGCATAGATGGAGTAACC  
CACACACCCACACGTGTACATAAACACTCCCTTAAATTAGATATATTT  
TCTGATGGTTGATCAGAGCTGTAATCCATTTATATATGACAGCATGATTA  
GTGTCATGAACCATGTCTCTGATTTAATAAACGCACTCCATTGAAAAACA  
GAATCCAGCAGACCCTTTTAATTTGCTTTTCTTGACACTTAAGACACCT  
GATGGAAACCTGGACATAGTCTCTAAATGCAAAATAAAATGGAAATTTGA  
GACTGATTTCCAAACAAAGGATATCGATCTTGGCATGAGTCCCTCCCTTAGGC  
TTTTACTAATATCAAGACCAAAGTAATGCTATTTTGTCTTTCTCTCTCT  
CCTCCTTCCCCTCTTCCCCTCCTTGCTCTCTTGATTTCTCTTCCCCC  
TAATACTTTTATCCTAATAGTTAACAACAATAGCAAACACAGGCATTCTTA  
TATTTAGTTACTGCTCTAAGGCTGTCCCCTATTAAGTCAAGTGATCTTC  
ATGATAGGGTTTTGGATTAGGTATTATAATTATCTTTATAGATTGAGAAAG  
TGAGATCCAAACAGAAAAGGTAACATCCTTGGTGTTAAATTGCTAGCCAG

TGTCAGAGGTAGGATTTGAATTCAGGTCATCTGATTTTGTCTGGCAGTAG  
GTGTGGTCCTAATCATTACAATCTCCTGTGTAGAGATAGGTTATAGACTG  
AACCACGAAATTAAATTTTACACCTAGGGCAGCCCATGTGGCTCAGGGGT  
TTAGTGCCGCCTTCAGCCCAGATCGTGATCCTGGAGACCCGGGATGGAGA  
CCCATGTCGGGCTCCCTGCATGGAGCTTGCTTCACCCCTGCCTGTGTCT  
CTCCCTCATTTTCTCTCTCTCTCTGTGTCTCTCATGAATCAATAAATA  
AAATCTTTAAAAGAAATAAAATAAATTTTACATCTAATTAATTTAAAGTG  
ATATTTGAGATAGATATCCTGCTTGAATTACCGATGTCCATATGTTTAAA  
ATATTTTATATTTTCAATTCAAACTACGCAGTAATTTCTAACTCTACAAA  
GTTAAATACAGTCATTGCCAAAAGCGTTATCTGCTAGACCTGCTTTGGAT  
AAGAATAATTTTAAAGGCTATATTCATTGTGAACATGTCATTGCATGTTAT  
TAACTCAAACCTTTAAAAGCTAAGAAACCTTTGTGATGGAGATCAAATGTC  
TCCCTGCCGTCTTCATCCTGCCTGCCACTGAAAACCTATCATCTCCACGTA  
TGCACAAAGGCAAATTTTTAGCCTAGCCTTTCTGAATTTTTATTTTTTTA  
ATTAGCAAGATCCAAGTACATGAGATTAACTTATAATTTTGCTATTGAT  
GTTTTGGAGAGATCAAAAATACTTTAAACAGATCACTTAAAAAATTCAA  
CACTTTCCAAGTATCTGGAAAACCAACAATTGTTGAGCTTTAATGATGA  
GTTCTTTTTTTTTTTTTTAAAGATTTTATTTGTATATTCATGAGAGACAC  
AGAGGCAGAAACATAGGCAGAGAGAGAAGCAGGCTCCCTATAGGGATCCT  
GACGCAGGACTCGATCCCAGGACCCAGGATCATGACCTGAGCCGAAGGC  
AGCCACTCAACCACTTAGCCACCCAGGCGTCCCTTAATGATGAGTTCTAA  
GTAGAACTCATACACACACACACACATGAATGCATATATAAATGTG  
TATATATATATAAATGTGTGTTTTTCTCTTCTGTATATCATATACATAC  
GTGTAATAAAGCAGTATGCTAATATGTAGTGGGCAAGCAACAGTTGTCAG  
AGGATTTCTAACTGCATCTGTGCAATGCAATTTGGCCATGTGAAACATTT  
TATTTTTTAATCTCATACTTAATAATGCCACATGGAATGAAAATGTATTC  
ATTCCTTTTCTATACCTTGAAGCATGTATCCTGGAGTCACAAAACCACTT  
ATTACCAGGGAGGTATTAGTCTTTGAAGTATGTATAATTACAGGAGAAGT  
TAACTCACTCAACTTTACTGGGTTTTATGCTTTATAGCAGAAGATGATT  
GTAATTCCTTTAATTAGCAGAATTTTAAAAATCCAGTAGCTTGAAGAAT  
ATTTTCTGGTTTTTGTCTAGGGATCATTGTCAACCTTCCAGCATGGTAAT  
TTAATGTCCCCTGAAATGTTATATGCCAGAATGATTAAGTATCATTACAA  
GGGGAATTTTATACAAAGGCAAATACCATACCCGATCATGTTCACTCA  
ATTACAATTAAAGTGAATGCACTTTAATAACACTCAGCAGTTTGTTTATC  
ACGCAGAGGGAAACAGGTGCACTACGCTACAGCAATTCATCTCATTTATA  
CCTGAGACATGTAGCTGAAATCACCCCTTCTGTCTATCTTCTTTATTAGGG  
TTACATTTATTTGGTAAAGCTTTGGAAGGAAATAAAAAATAGGCATATCAC  
ATAACAATGCCAACCTCTTTCTGCACAGACTTGAATAGTTTAAGCACCTC  
CATATCTTCCAAATACATTCCCTGGGCAACATTTCCCTCTTGAGTCTAATT  
AGAGTCTATTCTGTGTATTTACAAACAGGAAGCAACCAGGGCTGTGACCT  
CATAATCTTCACTCAGAGGCCTCCTCAATTAACCTGAGGTATTGGTGTTA  
TTTGGGAATGGACACTGGGGTCATTGTAAGGTCTCTATGTGACAAGGGCA  
AACGACTTCCTTTTTCTCCCTAAACATGACAATTATGTTGTTTTCAATG  
ATTAACCTTGACAATTAGAGGCATTTTCTAGAAATTTTAAACGACCCAATTC  
TAATAGTCCCTGAAAATAGGCAACAGGTAGTTTGGATTTATACTTTAAAGA  
TCAAAATATATGGATGAAACTTGAAGAAAAAAAAAACTGACACATAACAG  
AGTAGAAAAGGTCCATTACACCAAGAGGGTTGTGGACAAAGGTAATTAAT  
AGGTCCATAAAAAGCGTTCACATCTCCAAAGGACAAAGAAGTAGTGCCAG  
CTATAAACTGATAACATTTTAGGGTTTTTTTTGGGGGAGAGGGGGGATAA  
TGCTTATGTAAATGCCTATCTCCATGAAAACAGATAAGGATTCTGAGAT  
AATTAAAGACAAAAAAGATTGTCTCCTTGATGGTGTAGACCAGCACTA  
TTTTAATAGAGTCCATTTTCAAGTCTGTACAACCTAAAAATATTATTATCAT  
AATACCTCTTGATTTAACTGGGTGAAATTTTATCTTCACTTCCTTCTACA  
TTTTCTTTTAGGTACAGCATTCATAGATATTGTTTTTTTTTAATTCTTT  
ATTTATTCATGACAAATACAGAGAGAGGCAGAGACATAGGCAGAGGGAGA  
AGCAGGCTCCCTGTGGGGAACACAATGTGGGACTCTATCCTAGGACCCCG  
GGGTCATGACCTAAGCTGAAGGCAGACACTCAACCCACTGAGCCACCCAG  
GTGCCCTATAAATATTGTTTTGGAGAATATGTGTTGTTTAGCAGAGGAG

GGGGTGGTATTAACAAGAATATGTAGCATCTAGGCATAGGAAAGCCCCAA  
TTAGCGCTGCAGTTAACAATTATAGAATTATAAATTAAGCCATCAA  
ATAGGGGTAGTATTTATTATCACATTTTAATGATAGTATCCCTAAGAAAG  
CACCACAAGCTTCACACCAGCTTGTTCTCCTGTCCGTTCACCTCAAAGA  
ACAAATTAAGTGGGCAGTGGTTAATTTGCCTACTACATAAATAGCCTAAA  
TACTTATATATATTGCATTTGGTTACTGCAGGCAATGCTAGAGATGTAGT  
GTGGTTCAAAATATTGCTGAAGACTAGCAAGCATAAACGCTTTTTTAAAT  
GTCAACTTGTTCTTTTTCTTAGTTGCATTTGTTGAAATCCCAAGATCCCT  
GAGGAGCTCAGGTCATGAATTTATTGCTAGTAAATCAATTTAATATTCAA  
ACACATTCTACATGTTCCGTGTTGCTTGCTCTGAATTTGGCAGCTTAAGG  
ACGGGTGGCACAAAAAAGAAACCTTGAATTAATATCAGTTTCTCTTCTG  
CCCTCGCAAGAAAATTTCTACAGAAAAAAGAAAAACCCACAGGAGCCA  
AATCTATTTTCTCTTTATTATTTATATTACAAGTAACTGGTACAGAGAGA  
TACTTAACAGATTTAAAAATTGAAGATGCTGGCAAGGATAAATGTGCCGT  
TCCCCAAATTTCCATGCATTGCAAATACTACCGTTATTAATAAAAACAAT  
AAGGGTGTACTATGTGCCAGAACTGCTAAATACTTCACAAGGATTTTCT  
TTAGCTCCATTAATCTATAAGATAGTTTCTATAGCTACCCCTCATTGTAGG  
CATGAATAAGCTGAATTTCTAGAGAGAATGAATTACATGCTCAAGATCACA  
TAGCCAGGAAGACGCAAAACCAGGCATTGAATGGAGGCAAGAGAGATGGC  
AATCTCATTTTCTTGATCCTAGACTGTATAGCCTACTATTTTCATTGACT  
TTTTCTCAGAGTCAGTTCCCTTCTCTGTGTGCTTGGCTATTACTTAACATG  
CTATGAGGTTTACAGAATTATCTTTCCAAAAGGCCGACCCAGAGAAGGAA  
GAAAGGGGGTTCCAGTTGTTGATATACCTCAAGATGAGTCCGGGACATTG  
GATGTGGGATTGAAGAGGTCAGCATAGAATACTACAAATCAGAGGAAGAA  
AGGTAGGTGCTTTGGAAGGTAAGCAGTGCTGCTGCGGATAACTAGATATT  
CGTATATAGATAAAGCAAACAATACCCTGGATACTCAGAATGAAGTTCTA  
CATAGGAGGTAGTGATAGTCTTGAGTCCACTGAAAGGTGGCAAAGGGTTA  
GGAATGAGGTGGTGCTCTCTGGAGTTACAGGCAAAGGGTAGGGGGGTGGA  
ATGCGACACAATCATTACATTCTTAGGAATGAATTTTGCACAGTATTTCC  
CTAACTGTAGAAAGATGAGCAAATAGATACCATTTAATCTACTAATCTA  
CTTAGTATCCATCAGGATTCCATGTCACAGTTCCCACTAGAACTGAGCTA  
AACTGTATATAAGGGTTATGAGACATTTATTTGAGATAAACTTCTATAAT  
CATCACAGTTTGGACACTGTCCGTTGTAGGGCATTGATTTATTTAACTC  
CTGTATGGCTGCACTGTTTTGAATCTAGAATCTGTGGAGCAAAAAGCATT  
ATTTTGAAGGCTTAGTAGAAACCTGTTTCTCCTGGGATGGATAAGTTAA  
ACTATAAACTAGATCAAATGACATTTCTGAAAAGCATATGATCCAGAGAA  
CTGATCCATGGAAATTACTCATGGAGAATATTTACTGTTTATTTTAGATA  
ATCTTTGGGGATTGAGGACACTTTGTGCTATATCAAGACTAGAGCAGTCC  
CACTGAAAAGCTGGAGAAATATCCACGGTTTGGTTCTGGGTGGTTTAAAC  
CGGTCTGTTCCACTCAGTTTCCAGGATTTACAATGCAAATCCCCTTCATC  
CATTCACCTGGGAAGTCCCTGTTATAAAGTATATAATTACATAGTATTTT  
TTTTTTAGATTTTATTTATTTATTCATGAGAGACACAGAGAGAGAGGCAG  
AGAGAGAGAAGAAAGCTCCATGCAGTGAGCCCGACGCGGGACTCGATCCC  
AGGTCTCCAGGATCATGCCCTGGGCTGAAGGCAGGTGCCAAACCGCTGAG  
CCACCCAGGCATCCCTACATAGTATTTTCAGTGGAGAGTTTAAATATTTT  
CCAATAGTTGTAAAGATTTCAATGTACACTCAACTCTAGAACAAAGAAGG  
GATAGGTTAGGGGATACTGTTCTTTCTTCGTGGCCAGGTGGGTGAAAA  
AGGCAATCTAAAGGAATGTACAAGATACCAGAATCCTTCATCCCTGGGTC  
AGGAACCTCTATACTCCCCAAGATAAGGATTTTTTAACACCGTAAGTACTG  
AATATCCTATGTGAGATTTCCAGACTTCTGAATTGTCACATTACTTCAGT  
CCTTCAAGGTAGTGTCAAAAGAAGCTTTGAAAAGTGACATGACCAATTA  
AAGGTAGAGAAGTTTCTTTTCCAAGTATTTCCCATGTGAGCCTGAGA  
TGATACAAGAGACCACAACCTGGGAATGATGGTAAGATTTAAATGTAAAG  
ACTTCTTATAGATGTCAGAGGGCGGAGACGTGACCAGGCAATAAGTCACA  
AAATTGGAAAGACCATACACATAGGATTTTCTTTGTACGTAGAACTATG  
GTCAGTCAGTAACTGAGGCAAAATATAGGCACTGTTTTAAGCAGAAAGAG  
GCAAAAAAAGAAATTGAAAAGTAGAAGAAATGTGGTAGCATGATTTGAGAA  
AAGATTTATGGAATTTGATGTGGAAGATAATGTTTGATTTTATTTATAC

TCTTTGTGTTTGGAACCTCGAGCCTTACTGGCTCCTGTGGCCTTCCCCCTG  
CTTAGGAAAAAATCATGTCAAATACTCTATTTTAACCCCTAAGGTTA  
ACTCCATGATTAATAGGTTTTTAATAATAATAAAAAAAAACCCTAACTT  
TTCCCAGGCTTCTTTTGAATGAAGTGAAGCAGTTGGTGAAAGAGAAAGCA  
GAAAAATAAAGAGAAAGCCATATGTAGGACCTGTTGAGTATCGCCATTTG  
AAAATTTTCCTTATAACTTCAAATGCAACGCATCCATCATTTACAATAGGG  
TATGCTTGATGGAATAAACTAATGACTCTTTTCCACTCTTTACTTGTGAA  
AATATTGAGCTAAGTAAAGCATTTGTATTTACTCCTTTTCCTAGTCTGTT  
ATTAGGCCCTAATTGAGTAGAACCTTGTAGTTTAAAGTGAGAAGAAAAA  
ATCTGGAAGTGGCCATTACAACATGCTTCTGAAACCTAGTAGAGATACTA  
CAAAGAGACAGCTGTATGCAAAATGTAGTCATTAGTCAGTGAGTGGGTTA  
AACTGGAGCTTAAGAACCCATACTGGAGTTTGAAGTGCAGCTTTTCAACT  
TATTAGCTATGTGTCCCTTTGGGCAAATTCTCTAAGCTCCAGGTTAAAAT  
TGCATGTGCACTGTATTATGGCCCTGTGATCTTTGGCAAGTCACCTAATT  
AATATCTTGGAGCCTCAGTTTCTTCATCTGTGAAATGGACATAATAGTAT  
TCATCCTAGGGCAGCCCCAGTGGCTCAGCGGTTTAGTGCTGCCTTCAACC  
CAGGGCGTGATCCTGGAGTCCCGGGATGGAGACGCATGTCGGGCTCCCTG  
CATGGAGCCTGCTTCTCCCTCTGCCTTTGTCTCTGCCTCTCTCTCTCT  
CTCCCTGTCTCTCATGCATAAAATAAAATAAAATAAATAGTATATAG  
ATAGATCTATAGATCTGTGATGTGGATGATATGAAGTGATACACTGAGAA  
GCACATAAGACTTTTCTGTCCATGATGTGAGCCTATCATGATTGAAGGTA  
ACATGGCATAACGATTAATCCTCTTCAAATGGTAGTCATGATAAATGCT  
TGAGGGAACATAACATGGACATGCAATTCAACCAATGAAAAAATGACAT  
TAGAGGCTGCTCTAGATGAAAAATGCAGGGAAGGCCACTCTGTGGAGGTGA  
TATCTGAGCAGAGACCTGTACAAGAACCCAAAGAAAAGATGATCATCCTT  
GGTGGTAACCAAATAAAAGCAAGTGAACCAATCAAAGAAAGAATAATTA  
GTCTATCAAATTGACAAAAATAAAAGGATACAGTGAGGGAATGAGAATAC  
AAGCTCTTCTAGAAGAATTTTCTAAAGAGCAGTTAAAAATGTGAATATTC  
CTTGACCCACATTTATACTTTTAGAGTATTGTCTACAGACCCATCAGAAC  
AAATGTTACATTGGTGCATAGAGTTTTATGGCAATATTTCTCTAGCATT  
AATGCTTTCGTTTTTTTCTTTTTAATTTGTAAAGCTATTTATATCTTGAG  
TGTTTATATTAATGTGGAAAACCTAAGCATTTCATCATTTAGAAATAACT  
GGTTCATTATACTACTTATTATGTGCAATGCAATGTTAAAGCCATAGC  
TACTCAATATTCCACTACTATTCTTTTAGGTAGAGAGGGTTGCGTGATT  
TTAGTTTTTTTGACACACATGACATAAAATCATTGATTTGTGATTTTTTTC  
TGTTTGATAGCCATCCTAATGGATGATTAGAAAGAGAGGATATAAATTTG  
CCATTTTGGCTTATCTGTGCATCTCATCTCAGTGCTTACATCTCAGAACC  
AAGATGTTATCCCAGAACTGGATTTTGGCAGCCACTTTCCAAGTCATTGT  
CTGAGAAATGTATGTGATATACTTCTCTTGGAGACAATGGAACAAAAGTC  
AGGACACCTGGTTTTTCCCCTTCTACAAACAAGGCATGAGGTCATGGAGA  
AAGTCATTTTTCCAAAGAATCCTTATGCCAAAGTATGAGAGCTATGTTTT  
GACAGTATCCCACGAGGTTTACATTGCAGTGTCTGCATCTGGATTCAAGC  
CCATGACCTTGTGTGAAACTTGATTTGATGATCTTCAACTGATTTAACAA  
ACATATATGAGCACCCACCATGGGTCAGGTGCAGTGCTCAGGGCAGGGGG  
CATCATCAAGATGCATAAAACACGATCCCTATCTTCAAAGGATTTCCAAT  
TGAATGAGAATTTGAGTTTTATATAGGAAGTAAAGGCATTTTTGCACAGA  
GTTCTAGGTGCCACTAGCCATAATATTTTATCAGAATATCAAGTTTGCTT  
GATTTTCTGATATCTGCAATTGAGTTGGAGCAATGAAGTCTAGGTTTCCT  
GGTCCTAAATACAATGCTTTTGTCCATCGAAGTTGAATTAAATTGGAGTTT  
TCTAAGATTGGTGAGTTTTCTTAAGATCGATCAATGATAGTTTCTTGATGA  
ATGTATAATTTCTTAAATGATGAATCATGCCATTGTCTGTTGATAGGTTG  
CGATAATTTATAACTTTGCCAAACCAATTTTAACATCCTGGGACATTTCA  
TATAACTGACTTTTCAATACTTCCTTGGCCAGAGACTTCCTTTAATTCCA  
TATTTACAATTAACCTTTAAGTTATTATAGATAGGGAATTAAAGAACTG  
AATAAGTGTTAAAAAGCAATTACCCACTCTTATGGCTACACCTTAGATAT  
TTGTTATAATATAAACTACTCTACCTATAGATTCTTAATCTCTGATATC  
TCATCCCACCTTGGGGTCTCCTCGCTCTCCACATCTCTCACTTTCTGA  
CCCCACCTGCTTTGCCATGATCTTATCTCATTAAATTCCTTGTAGTAGT

GATGTAAAGGGACAGATGGTAACCACACTTATGATGAACATAGCATAATG  
TATAAGCTTTTCAAATCAGTAAGTTGTACACCTGAAACTAATATAACATT  
GTGTGTTGATGGTACTCAAAAAAATTTTTTTTATCAACTTCCTCCTTCCC  
CAATACACCCAATCCCTGATGATATATCATGTCAACTTAGGTTAGGCCAA  
TCATGTTTCCTGTTCCAGAAATAAAACCTCAGGTGATGATTCACAGGGAA  
TTACAGTAAATGGCCTTTGGTCAATAAGGGTAAATTCTGAGAGTATATGA  
AGGCACCAACACTTTTTATGACAGGAAGTAACACATTTATTTTCCATGTA  
TTTTCTTTTACCTATTTGGCAAATAATTTTCATTCAATTCCTACAACTC  
TAAATTGAGCCCTTGGGATCCCAGCAAAGGGAAATCTACCTAAAATAAAA  
AGAACAATGTGTCAAACAATAAGGCTTTCTCAAGGGAGAATACTGTAGTC  
ATACAGAATAACAGCATTGGCAGCAAGATAATTCATCTTGAACAGAATCT  
ATATCCAAAGAATGACTCTTGTTAAAGAATAAAAAATTAACCTCACATCAAG  
AAACTATATAAAAAAGTGTTGACATTTAAAACCTCCCTCAAAAAAGGGTCT  
GAGTTTGGACCAAAGGACTTCCTTCCAAATGTGACCACACAGGAATACAA  
AGCAAAGTCTTGACTGATATTTATTTGGATTGTAGAGGCTTTGACAAA  
GAGCAGCACTGAAGAGAAAAATCAGACTTGGGATGAAGTATCTTTACAGTA  
AATACTGATTGATGCACTGTCTGGAAAATCTAAAGCAGCCTTTGAATTTT  
ATTAATGAAGTTAGTACAGGTAAAACAAAAACAAAAACAAAAACAAATAT  
AGGTACATAAAGAGAAGATGACCAAGCAGTATCACCAGTATAAAAAATAGT  
GTTGTTGTTGCTATTGTTTACATTTTGGTGTAAACATTCTCCAAAACAGT  
CTTTCTTCTTTTCTCTCTTGTCCCCCAGCCCATCTCCACCATGTATGTGT  
GTGTGTGGGTATGTGTGTGTGTTGGAGAGAGAAAGAGAGGGAAGGCATT  
GTTCTCTTTCAACATGATAAGTCCTTAGTATTATCTGGCTTTTAAATTGG  
GGAAACATTTCTTTTACATCTTGATTTTGGTTCTGTTCCACCTCTTTTCA  
CCCTTTCCCTTAAGAAGGGTGATTTTTTGTATATCAGATCTATCTCATCA  
GGCCTCCATGTTTATCATGCTTTTCTAATAATCATTTTCTCTAGTTTCAA  
GTGGAATCAGTTGACACCTACCTTCCACATGATTTATTCACATTTTTAGG  
AAATGAATCCTGATCTTTGTGTGTCAGTATCAATGTCATAATCCCTTCCT  
CCCATTAAATGTCCCTGGGGTTCCTTAACCCATCTATCATGAAGATGGGCC  
CAGAGAAAGCACAACTACTGTGACTGTGAAGGGGGAACGTGTAACAAATT  
CCAGGAATCCTGACATGAAGATAAAAGCAGAATCTGAAGAGATAAAGATT  
TTCGGGTAGAAAGAATGGTTGAACAAAGACCTAGAGATACAGTAACATCT  
ATGAATTAAGGTAAGTCTAACTTTATCTATAATGTTAGGTGTATGAATAG  
AAGCAATAGAAATAAGATGAGGAAGATCTGGGCCCAGATTGTGAAGATAA  
TGTAACATACTAAAAATACGAAGTACAGTGGAAAATGAGAACACAGATCC  
AAAGGTACAATAGACTCTATGGACGGTCTGTATGGAGGAAAGAAATGAAG  
AGACACTCCAAAAGCTGGGTGATTCTATCCTACCCACCCACCCCCAGT  
TTCTCAAAGCAACAAAATACAGGCTTCCTCATATAAAGTTCTAACCCACC  
AGGATCTGTTCAAGAATTAGAATGTTATAATCACATAGGGGTGGCTTTCC  
AGTTGTAAGTTGCCAAATTTCCAGAGGCCCTTTTAAAGAATGCTGATAAT  
AGGTATTTCTAAGAGATCACAGTATTTGTCTAGCCTAAACAAACAAACAG  
CTCTAGCAGTTTCCTGAGACCCCAACATTCTTCCCCTAACCAAGTAGGTTA  
CATTTCATCTTGTTCTGTTCTTTTGGGCTGACTTCTTCACAAAGACTAAG  
AAGTATACTTTTTATCTGAAGCTTAATCAGAAGCTCTCCTTAATGTATTT  
CTAATATCACATTTCAAAGATTTCTAATGTCCCTGCTATGATACACCGTA  
CAGTCAAAATGATAACACAGGTACATGACTTCGACATGGTCCTTGGTATT  
CCTCCTCGAGAGTTTGTCTCTTTTGTAGAATTTACATCCAAGTCCTTA  
CAACCCTTAAACCTCCAGCAGAAATAGGTATAAGCTGTAAGAGAAAATGA  
TCCCTGAGCTCATCCCCTTTTCATGGAACTTTCTAAGGTATAAAAAATAAA  
ACAAGCCAATAGCATTATAGAAAAATGTGATATCCAAATAGAATTGTTTAT  
AAATAGAATGTTTTACAAAGTTTCCATGAGGGATCAGCTGTCCTTTAACC  
CCCTGCTTGCTGACTTTTTCCAGCCCACTAGCTAAATTAAGGCTTAGGAA  
AAAAATTACCTATGCATTGTGTTTTATGTGGCTGTTTCATCTATTTTTATA  
TGCTGTGGATATATGACATCAGTTTCATTACAAACATATCAAGACGCCCCC  
ACAGACACTACAACACACGTATATTTGCAGACATGAGGGGGAATATGAAC  
TAATTCTTGCAAGTTTATGTTGCCAGATGAGCTGTACCCTAACCAAGCTC  
TAATAGGACTGGGGTGAGACAGTGTGCTTGGTGTCTCCCTTAAGCCTG  
TTGTCCTGATGTAGTTGACAATAGCACCCCTTGTTTGCACCTCAAAGTG

TCCCCTTCAGATGATAAAATTCTGCGATCACTCCAAGTATGAGACAAGTTA  
TCGGTTATTTGTGATTACTGTAGTACTCAGGAGAAGGTAGCTGAGAAATA  
ATTCAACAAATTGTCTAGCAGAGACAGATACCACTCAGTTAAAACCAGAT  
TTCAGGACAAATGGAATTATAAAGATTGTTTTGGTTTTGCCAAAGGGCAG  
CATCACTATTTCAAATTAGCTATGCTATTTTCTTCTTTCTCTATCCTGT  
TTCTTTCTCTCTTTGACAACAAATACATAACATAATCCAGCTAGAGTATA  
GTGTGCTACACAACGATGATTTGACTTATATAATTATACTCTGGTAAATG  
TAAGAAGCCTAAATACAGGGAAAAGAAAAGCTGCTTTCTTAATATAGGAAT  
GTCAACTGTGTTCTATGACCCGGGTACTAACACCTTTCTTACTTCCAAT  
TGACAATTGGCATTGAGATTCTAGACAAGTAATAGCAGTTCCAGGGCTTT  
ACTTTTCTGACCGTGGATGTCTAAGGTAGAAAATGAACAGAAGTACTGGG  
TGTTTTTTAAAAGCTTCTAAATGCTAGTTTTCCCCCTTATATCAATCTAAA  
ATGGTTGTATATACTTATACATGAGGATATTGTACAAATACACCATAATC  
AAAATGCATAAGTAGTTTCATATAATTTTAATTCTTGTACTTTTTTCAAAGG  
CATGTGACTTATTTATATAGTATTCATTGACTTGATGTTTTATTATTTTG  
CACTTACTGTATAACCCTTAGGAAATGAAAACATGCAGATGACAGCTTTG  
TGATAGTGTGGTAATCACCCCTGTGAATGATGTGTCCAGATAAAATCAAT  
TTATTCTTAAGATAATCAGGAAAAAGCATGATTTCAAAGTCAGGAAGTCA  
AGTTACATGAATGGAAATATCACACATTATCCTTCTTAATTGCTGGTGGT  
GGACAGGAGACATCTCAATTTGCATATATAAATTTAGTGAGCAGGAAATG  
GTGTATACAGCACGCTCACAATTGGACCAAGCCATGCTGGAAAATTCAAA  
CTTGGTGTGAGAAATAGAAAATGAAAAATTGACAACATAGGATGTACAGA  
ATCTTTGGCCCTTCCATCAATCTCAGAAAAAATTTCATTTTGAGAGTGTG  
TCTAAGATGAGCATTTTATAAAACACATGAGGCAAGGAACACAGATGTTG  
GATTAACATTTAATGAGTTCAAATCCCATAGATCCAAATTCCTAATCT  
TGTGCCCTTGAATCCATTTGTCAACTACTATCAGTGTCCCCTGTAAAATG  
ATTTAGATGAGTTATTGATCTAAGGCATTTCAGTATAGTGCCTGACCTATA  
GTAAATCAGGTGAGTATCCTCTCCATTCACCTGTGAATAGAGAGAACCCT  
GCTATTATTGCAACAGACCTCCTAACTTTGGTTGCTAAAGGAGTTTGTTG  
AAACAAAGAATAACTAGAGTGTCTCACCCATTTAGGATTTCTTTTTAAAG  
CCAAACAGGTCAATAGATTAATACTCATTATCTTTTAACTTTTGCCTGC  
CAACAGGATTAACTGGCAGGCATATTCCTCCCTTACCATCTTGGTAGGC  
AAACTGATAGCTCCCTGAAACTGTTTCTATTTTCTCAGACATCTGCTTTT  
TCTATAATCATTATAATTATATTTGTTGGCAGATTTGGATATGACCTTGG  
CTTTGGGAAAGCAGATTTCAAAATATTCATAGAGAAAAAATAAGTATGAT  
CCCATGTCAGAGAGATTCTTTGAAAAAAATTTCTGATTTTGAAATCACAA  
TTCCAATGAGAAAAAATTAGGGACAGAAGGATTAGTCATCATAGCTGGTA  
GATAAATTTCTGAAAACTTTTCAGTGGACATGCCAAGCACAGGCTGATCC  
CATACACGAAAAAAAAAAAAAAAAAAGATAAATTGAAAGGTGGAGG  
TGGAATCCAGTTAGAGAAAAGTCCAAAAAGATCCAAAAAGTTATTTAAGA  
GAGTGATAGGACTTTAAAAGCAATGAATAGGAAATAAGAACGAGGTAGGA  
AGAGGCTCACAGTTTGAAGAAGCTGGTGTCTGCCTCACAGGTGACAGATG  
GAAGGCAGAGCAGCTGAACCTGGATTTTATTTTGGCACTTTAAGCAAAG  
AAAAAAATAAATAAAATGGAAGGTACAGAGAGGAACCTATAACACCTGAG  
ATGAGGACATAGTAATAATAGCTGATCAGGTTTCAGTTCAAGTAATTTTAG  
TTCAAATAGTAACGCTAATAGTAATACCAGCAAACACAGTGGGCTCGGTA  
TCTGTGAGGCATGGTTCTAAGTGTCTTATTCTTAATGCTCATTGCAACC  
TCATGAGGTAGGTTTTACCTATTGTTACCCCGAGCTTACACATAAAGGAA  
ACTAAAGTATAAGGAAGTTAAACAGTCCCAACTTACCCAAGATGTTAGAA  
GGTGTGAGAGTGTGAGTTAAGAATGAGTTGCAAATTCATAACACAAAAAAT  
AGAGTTTCTCAGCTTTTATTCTTTTCAAATGTGAAGAAAAGTTTCCAGA  
GGTCCCAGCAGAATTTTCCAGAATTGCATCTATCTTATCAGTTGGCAAG  
GAAGATGAGACCACCATTTGGACTTGTATCAAACAAGGTTTACCATGGA  
GCAGGGGGGGAAAAAGCCCCAATAGCCCCAGAACAATAATAATATGCCCT  
CCCAAAGGAGGTGAACAAGGTCAGGAATCTGCAATAAGGAAGGAGGAAGG  
GGGAAGAAGGAAGACTGTGCCCCACAATCTGTACTTGTTATTTTTTTAAT  
TTTATTTATTTATTTATTTATTTATTTATTTATTTATTTATTTAGAGAGA  
ATGCATGTGTAAGTGGGGGAAGAGAGGCAGAGGGAGGAAAGAGAATCAAG

CAGATTCCACGCCACGACGCGGATCTAATGACCCTGAGATCATGACCCGAG  
TCGAAATCAAGAGTTGATGGTGAAGTACTGAGCTACCCAGGCACCTCTG  
TTTTTGCTATTTTTTAACAATAAAATAAATTTGTTAATAAAATAAAATAAAT  
TTAGTTTTTATTTAATAGAATAGGAATTTAATAGAAAGAACAAAAATGGAA  
GTAAAATGGAAGGGTTTGATAATTTTCAGATAAACATTTTTTTCAGCATAAA  
AGTTGCTAGTTTTTCTAAGATGTCCCCAATGTTAAAAATATAGATTTATT  
TTTTTTAAAAACTTTGAGATTTGGTGTTTTATTTTTTTTTTAATGTTTAAAG  
ATTTTATTTATTTATTCATGAAAGATACAGAGACAGAAAGGCAGAGACAC  
AGGCAGAGGGGAGAAGCAGGCTCCATGCAGGGAGCCCTATGTGGGACTTGA  
TTCTGGGACTCCAGGATAACGCCCTGAGCTGAAGGCAGGTGCTCAACCA  
TGAGCCACCCAGGCATCCTGAGATTTGGTCTTTATAAATATTCAAGTTTT  
TACATTTCTATAATCTCCCAGGTTTTAAAAATTTTGTGTTTAAATGATTA  
TAATACTAATGAACATCTCTTTTATCATTTCTTAATATCTTAATGGCAGTG  
ATCACTTGATTGGTTGAATTTTCATTATCAACATATTATCCTTGTAACCTC  
ATATTGAATTCTCTTATGCATTTTTATTTTCAGTATTCTGTTTTGATTGTC  
TGACTTCCTTTGACACTATCAGACTTTACCTTCTTAAGTTTTTGTAGTGG  
AGTGTGCTGTATCTCACACCCCTCTTCTTCATGATTTCTTCCCTCTCTCA  
TCCCAAGAGCCTTCAATAATCCCTCAAATAAAATAAAAGTGAAAGGAAAA  
GAGAGGAATTCGACACATCTGAGGGGAAGGGATAGTAGTATAATAGCTGA  
TCAGTTTTTCATATAGATAGATGGCATATTTTCATTTAATTTCTGGACCTT  
CTATAATTACCCAATGGGGTAGAATTTATTGCTTCCTGGATAAGTATAAA  
AAGTGCACCTTCTGAGTTCTTGGATGTCTGAGAGTGATTTTACTCTGACC  
TTATGATTGATTGGTTATTTAGCTGGAGATTTAAATTTTATAGTAAAGAAC  
TGTATATCATGGAAATATTGAGGCAACAGTTTTTGTCGTTTAGCAAGAAAT  
CTGATTTCAATTTCTTTGTAGGCAACTTTTTCTCTCTCTTCTCTGTGGA  
AGTTTTGGAGGGCCTTCTCTTTATTCTTTGAGTTCTGAAATAACAATGGGG  
TAGACAAAGGGAACTTTCTGCTTGAAAAATCCTATCTTTAACTAACTTCT  
GTTAGTTTCTATATATTGTTGCTTTGATAATATTCTGTTCTGTGTTTTCA  
CTATTCTCTTTCTGGATCTCCTGTTATTTATAGGTTGGGCCACCTGGATT  
TCTTCTCTATGCATTGTATTTTTCTCTCACATAAAACAAACAAAAGTAA  
ACCCCTTTTTTGTGTTGCACTTTAAAGATTTTCTTATTATTATGTAAGCT  
TCCCATTCTCTCAGGTGGAAATGTGTTTGGTACAGTCATGGAGCAGCTAGC  
AGTGGCAGGAATAGTGTATGTTTCCATGGTATATAGTCACAGAAATGAAG  
GAAATTAAGAATATTATCTGCTACTCTATGGTAACAAGTGGAATCTTA  
AAGACGATGGTTTCTTTCTTTTTTTTTTATGAATTTATTTTTTATTGGTGT  
TCAATTTGCCAAAAAGATGGATGGTTTCTTAACAAAAAGTAAATTTGTGAA  
AATCGAGACACAGACTTTTTACTTATATCCTATGATTTTGGAGTTTAATA  
TTTTTTTTGTCTATATGCCAAAATTTTGCTTCCCGATAAAATTTAAAAATAATC  
ACTTATTAATGTATGATAGCATAATCATTATAATACTTATATATTCATAT  
GTTTTTAAATGTTAATGCTGTTTTATAAATGAAATTACTGAAAAATAAGTA  
TTATTTTTCAGATTTTTTTTCCAATCCACTTAGAATGTCCAGGGTACTGTGT  
TTTAAGTCATTGGAATAATTCTTCAATGAGTATTTATGTCTCCAACCTCA  
AAATAGAGAAAAATCTGATTTTCGTTTTTCCCTTCATTCTTATGAATTTTT  
ACTATAATTTTTAGTTATATCAAATATTTATGTAATTTCCAAAATCAAGA  
CAAATAATATAAAGACAAAATAATTTAGAGAAATCTAACCATGATTTTTTA  
CCATGATTATTTATATACAGATATGCTTTTATCCTTCCTCCCTCTTAGG  
TAAATAGTATCACACAGTATACATTTTGTTTACCTGGTTTTCTGTCTTTTT  
AAGTTTATAGCTTGGAGATTATGCCAGAGAAGTATTTATTTCTTTTTTTTA  
CACATAAACAGTATTTAGTTCCATGATATGCGTACCATAATTTATTCAAC  
TGTGCCCATATCACAAGACTGTCAACAACAATTTCCCTGTATACATTAG  
TTCATATTTTTTGTCAACCATATTTTGGGATAAATACCTATAAATTTGGATT  
TCTTTGTCAAATGATAAGTGCATATGTAGTTTTTATTAAGTTTTTATCAAAG  
TCTGCTCTGTTAAACATAGTACACTTTGCATCCTTCACACTTCTATTGCA  
AAAGCCTGTTTTTCTACCCTAACTACAAAATGTTATCAAACCTTTTGATA  
TTTGCCAATTTGGATAAGTGACAAATAGGATGGTTGTAATTTGTCTACAGAA  
GCACTTTTACAGGAGCTGGTTATGAAATCATTTTGGCAGCTCTCAATTTA  
TTTTTGATGTAAATTAGAGTAAATAGAATTGAAATTTAAATTTAAGAAAT  
GCATTATGTAGTAAGTGCTATTTTTGTAAAGCTTATTTTGTGAGTAGGAGT

TTGTGTATGTGTGTTGAAGCACAATATAAAATATTTTCCTCAAAGAGAAC  
TGGAATAATGATAAAAAGATTTTAAATCACTATTCTAAAGAGTTTCCAGA  
CGTCTTTGAGAGAGAAGTTCATCCGTGTCTAGGCTTCTATCTCCTTTGCC  
AGCTTTACCTCTCAACCTCTCTGCTTACAAGTGAGGCATGCTCCCTGAGT  
AAATATGCTATGGGTGTCTCCATGCCTTGGCTCAAACAATTTCTTTTGTG  
TGGGATACTTTTCTCCATTGACTGCATGGCGCATGCCTACTCATCTTTT  
AAAATTTTACTTTCAGTGCCCTTATTTTATGAAACTCTCCTCAATCGGTAC  
CTACTACACTTGCACAAAATTCATGGTGTTCATACAGTATTTTATTGT  
ACCTCTTTGTATAAAGTACATGTTTCTCCCATATGCAATAAGATATTTG  
AATGTAGGCATTACATTGTGTTTATTTCTTTATTTTTTTTAAGATTTTAT  
TTATTTATTCATGAGAGACACAGAAAGAGAGAGGCAGAGACATAGGCAGA  
GGGAGAAGCAGGCTCCATGAACGGAGCCTGACGTGGGACTTGATCCCAGA  
ATTCCAGGATCAAGCCTTGGGCTGAAGGAGGCGCTAAACCGCTGAGCCAC  
CCAGGCTGCCCTGTTTCTTTTAGTACATAACACTGTAATCAACTCAA  
TAAACATACATGTAATGAAAATGCATAAATTATAACTTTATAATAGAT  
TCATTAATTTTTTCTTAGTTACTCTTTTTCAGGTTGCTATAGCAGAGAAA  
TCCCATAGGTAGTATGTCTTGTCTTTGGTAGAGCATCCTGCAATCTTATA  
TGCAGATACTTATAATAAAGGGAGATTGAGGACTGAAGATAGAACTAGGA  
ACATTTTGAGGTTTCTCAAAGCAGAGCCTGTGACAAAAGGCTTCCACACA  
GATAGCTCCTGACCCAGGAGTGAAGGAGACAGAAAAAGTGAAGCTGGAAA  
AGAGATAAACTAACACAACAGGTGTTATTGGCCCTTGCTAATGAGAAATG  
ATGCTTGATTCTTGGAAGAAGGCAGAGATCAAGTGATTCCCATATTCATG  
CTTCATTTCTCTTTGAAGGCACTTTGTAATTCACAAGGAGAAACCAGATT  
TATTTCTGAACAAAGGAAATAGATATTGAAGGCAAAGGTTAGGGCTTGGG  
GAGCAGCAGACTACTGAACAGGTGGAGTGGCAGAGAAGAGATTCCAACA  
TGCTGTAAAAATTCACCTCATGTACTTAATCAGCTACAAATATGTACCTG  
CTCAGGGTGATAATCAGCAGGTCCCCAGAGGATAAGTGTGGGAGGACAGA  
GGGCAGGGCAGAGACTTCACAGCTACAGAGTCTGTGAGAAATGGAGTTG  
GTCATTGCCATGGTAGAGACATATTGGTGAACCTCCCCTGGAAATTTAGT  
TGAAGACCCAGAAAAACCACATGCTTAGGAGAAGGGACAATTTTCTAGAT  
TAAAAAAAATAAGCCAAAATGTAGCATCCTTATTAATACTAAAACCAA  
GACATCAACAATTTATCTGCCTGTCAGAACAAAATGATATTTATAGAAAG  
ATGGTGCAATACAGAGCATCTATACTGTATCACCTACAATATCCAGAAAG  
CACTAAAAGTAGTGTCTATATTTAAAGCAGCAGCAGTGATTCTTAATGA  
AAAAGTAAAATGGTCAATCGAAACAGATTTCAGAGGTGGTCCAGTTGCTAA  
ACAGTGTGACTGGGCAACTCTGAGCTTCAGTTTTCAACCCCCACAGAGTT  
GCTGTAATAACTAAATGTGTTAATTGTATTTAAAGTTGATTATTGGGAT  
AAAATTATATATGATTATCCTATCAAAAATGAAAGCAAACAATAAAAAGA  
AATACACCAAACCTTCTGCACAATAAAGGAAATCATCCGTAAA  
ATGAAAAGCCAACCTACTGAATAGGAGAACTATTTGCAAATCATAGATA  
TGATAAGACATATGGTTAATATCAAACTATATGAAAACTCACAACTTA  
ATAGAAAAAATCTGATTAAAACTGAGCAAAAGATTTGAATAGACATTTA  
TCCAAAGAAGTCCTATGGATGGCCAACATCACTAATCATGTAGGACATGT  
AAATGAAAATGAGGTATCACTTCACACCTGTTAGAATGGATATTAGCAAA  
AAGCCAAGAGATACCAAGTGTGGCAAGGATGTGGAGTAAAGAGAATCCT  
TGTGTTGATAGGAATGTAAATTGGTACAGCCATTATAGAAAGCAATAAGG  
AGATTCTCAAAAAAATAAAAAATAGAACTATAGGATCTGGTGATTCTACT  
TCTGGGTATACGAAGAAAAATGAAAACACTAATTTGAAAAGATGTATGCAC  
TTCTATGTTTCATTAAATGTTATTTATAATAGCCAAGACATGGAAATAAGA  
TGTGTCCATTATGATGGATGAATGGATTTTTTTTTAAAGTGGTACACACACA  
CACACACACACACACAGTGAATACTATTTCAGCCATTAAAAATAACGA  
AATGCTACAATTTGTGACATGGATGGACCTCGAGGGCACTATGCTAAGTG  
AAATAAGCCAGAGAACGACAAATACTATATGATCTCACGTGTGGAATCTA  
AAAGAGAACCAAGCTCATAGGTACCAAGAACAGATGGGCAGTTGCCAGAG  
ATGGAGGGGTTGGGGGTGGGTGAAATGGATGAAGGGAGTCAGAAGGTACA  
AACCCTCAACTATAAATAAGTCGTGGGGATGGTGACGAGAGTTGTTACAA  
AAAAAAAATGAAAGAAAGCCTGGTTTGATGGAACTTATTCTACAGAGTT  
GGTTGGCATTTATTTCAAGGGAGATAGGTGGTTTACTCAGGGCTTTGCAA

TCAGAAAGAACTAGCTGTGTGGCATTGAGCAGACTTCATCTCTCTGACCT  
TCAGTTTTTCCCAAACACAATTGCGAAGTATTAGAGTACCTGTCTTGAGGG  
CACTGAGAAGCTATTTCGAGTGTCAAGGATATGCAGAAATGACTGCAGTTC  
CTGGTCAACTGTGAGCCAACAATGTGGTGAAGCTGTAAAAAAAAAAAAA  
AAAGTTTAAAGTGAGAAGAGTGTGATAGAATTATGTTCCAGGAATGAACT  
GTAGTAAACCCCACTGAGCCATTCTGAAAGATGAAGACATCTTTTAAGAT  
GTACACAGACAGGCTTTTTCTGACTAGAGGGTGGCAAGGCTCGAAGTAACT  
GGAGAAGTCATCCCTGGGAAGATGAAAAAGGGAAGCACTTTTGACAGGCT  
GCTGTGTTGAAGAGGCGTCAGATTTGGTCTGTGCTGTTCCACAGGTGGGA  
CTGTGACCACTATTAAGACCCCTCGGGAAGGCAGATTTTCATCTCCGTCTTA  
GGAAGCACTTTGAAACAACCTAGAGCAATCCAGTGATAGAGTGGCCCAATT  
CAAGAAGTAGTAATCGCCCTGTCACCAAAAGCTTTTCAGCAGATGTTGAC  
TTCTGCTGAGGATCATTTTTGGAGGAAATTCCTGCATTTTGTAGGAAGTTG  
GACTAGATGACCTCTCATGTTGCTTCCAGCAACAAGATTTAACTTTGTGG  
AAATTTCCATATTTGGGCTTTTTTTTTTTTTTTAAGTTATACTCTGCTTTAG  
TAGCTTTTTTTTTCCATGCGGATTAAATGGATAAAAAATTCCTTGTTATTTA  
AAAGGTGAGTCAAAAGGAAAAATAGCATGTGCGACGATAAAGCAGCCCAA  
CAGTTCATCACGCATCTTAAAAACACAAGTCAGAGCACTAGACAACCTCA  
AAGGGGACCACACCATTTGCCAGAAGTGCTGGCCAAGAAGCCAGCTGCTCC  
TGGAAAAATACATTTCCCAGCTTGGCATCTGAGCCTCATGATTGCTGTCC  
AGGGAGGTGGAAGAAGAATGGGTTTATGGGCAGCCATAAATAACTAAGGC  
ACTGAAATTTCTGAAAATGGGCCAGTTTCTTCATTATGATTCAGACCCAA  
ATAGGAAAGAGCTACTGTTCCAGTTTGAAGGCAAGGGAGCTGTAACCACC  
CAATTAGGAAAACCTAATGAAAAATAATTGTAACTCTGTATTATTCAATC  
AGATAAGTGCTCTGCAGAATTCTTCACACTAAATCTTGAGTTGATATTTT  
TATCTGCAAAGATATGAGGAGGGAGAAATGGAAATGATTTGGGGAGGATC  
TCCAGGGAATGCCAGAGAGGAAGACCGTATTGCTGTATCTATATAATCTA  
ACCTGAGGCTTATGTTCCCTCAAAGGACAGTGGAACACATGCCTGGAACCT  
GTTAAGAAACCTGAAGTTTGGACAGAGGAGTCCTCATGACTTAGTCCTTA  
AGCCTCTTCCAGAATTTTGGCATTCTAAAAATGGATGAAAGATCTAAATG  
TGAGACAAGAGTCCATCAAAATCCTAGAGGAGAACACAGGCAACACCCTT  
TTTGAACTCGGCCACAGTAACTTCTTGCAAGATACATCCATGAAGGCAA  
AGAAACAAAAGCAAAAATGAACTATTGGGACTTCATCAAGATAAGAAGCT  
TTTGACAGCAAAGGATACACTCGACAAAACCTAAAAGACAACCTACAGAA  
TGGGAGAAGATATTTGCAAAATGACATATCAGATAAAGGGCTAGTTTCCAA  
GATCTATAAAGAACTTATTAAAGAAACAAACAATCCAATCATGAAATGGG  
CAAAAGACATGAAGAGAAATCTCACAGAGGAAGACATAGACTTGGCCAAC  
ATGCACCTGAGAAAATGCTCTGCATCACTTGTTCATCAGGGAAATACAAAT  
CAAAACCACAATGAGATCCCACCTCACACCAGTGAGAATGGGGAAAATTA  
GCAAGGCAGGAAACCACAAATGTTGGAGAGGATGCGGAGAAAAGGGAATC  
CTCTTACACTGTTGGTGGGAATGTGAACTGGTGCAGCCACTCTGGAAAAC  
CGTGTGGAGGTTCTCAAAGAGTTAAAAATAGACCTGCCCTACGACCCAG  
CAATTGCACTGTTGGGGATTACCTCAAAGATACAGATGCAGTGAAACGC  
CGGGACACCTGCACCCCGATGTTTATAGCAACAATGTCCACAATAGCCAA  
ACTGTGGAAGGAGCCTCGGTGTCCATCGAAAGATGAGTGGATAAAGATGT  
GGTTTATGTATACAATGGAATATTCCTCAGCCATTAGAAATGACAAATAC  
CCACCATTGTGCTTCAACGTGGATGGACCTGGAGGGTATTATGCTGAGTGA  
AGTAAGTCAATCGGAGAGGACAAACATTATATGTTCTCATTTATTTGGG  
GAATATAAACAATAGTGAAAGGGAATATAAGGGAAGGGAGAAGAAATGTG  
TGGGAAATATCAGAAAGGGGAGACAGAATATCAAGACTCCTAACTCTGGGA  
AACAAACTAGGGGTGGTAGAAGGGGAGGAGGGTGGGGGTGGGAGTGAAT  
GGGTGACGGGCACTGGGGGTATTCTGTATGTTGGTAAATTGAACACCAA  
TAAAAAATAAATTTAAAAAATGCATCTTGTCTCTACATGGACTTCTTC  
CTCCCTATAGCCATTCATTAAATAGTCCTTTGTTATATCTATGATGCTCT  
AGTATTTTTCTAGGTGCTTAATATCCAGAAGTGAGTAAGATCTGGTGCCT  
GCTCTTTCCAAATGCAAAAGAGCAGTGTATCTCAAGTTGCTTTGTTCT  
CTCCTTGGTAGTTATATACGTGGTGTGAGTTGAAAGGAAGTTGGTAATGA  
GAGAAGTGAATGGAGAGTCATTTGCCTTGTCCTCCTCCTATAGCATCCTT

TTGCAAGTGGAGTAAAGCCCTATGATTAAATTTAAAAATATATGAGAGGTA  
CCCACAATATGAAGGTTTTTTTTTTTTCTCAACACACTGAAAATCCAGTA  
TGTTTTAAGATAATTAACCTCAGTAGGATACATTTTGCCTTCTCCTGGAAG  
ATTAACCCATATATTCCAGAAAGCCCTTCTATCGGTTCTTCTCAATTTCT  
CCGATACTGTCTTACACTCCTCCTGAAGGCTACATTCAAATAAAATGAGC  
TTACCCTTCTCCTTTGCTTCATGGAAATAACTCAGTCTGCCTAGGCTGAC  
AGGTAGTTCTACTAGAAGAACCTGATATTCCCTTCATAACCAGGTCAGAGA  
ATTTAATATTTTAAAGTCTTGAGCCAACCTTCTCCAAGTTGTTTTGTTTTA  
TCCGTCAGTGCATGAACCAAATTATTGTTTAAATGCAGGAGATACATGGAA  
AGAGCGAAGAGGAGTAATTATTGGTACATATTCTATTTCCCTTTAAGATTT  
TTAAAGGTTAAAAAAGATTTTTTAAAGGTTTTTAAAGGTATTTAAACATGG  
GACAAATATCAAATGTTTCTATAATCTTTACATTTAAAAATGCCTGACATC  
GCCTTGAGAGAGTCTGAACAAGTAGATATCACAAGAGCCTCTAGGAATCT  
GTACCTTTTTCTTTCTAAACCTGAATCTTTCCGGATAATATTGCTGATTGT  
CTGTCCAGCCTAGGGACCATTTCTCAGATACGGATTTTCAACCCTGGATG  
TGGATTAGAATCACATAGGGAACCTTAAAGATTGTGATGTCGAAGCTGTA  
TGCTACATCAATTAACCTCAAGAGTTTCCAGAGGTGGAACCTGAGCATCAGT  
ACTGGTTATTTCTCTCAATGGAGAGAGAAGCAATAGATCTTGATCTTTGT  
GATCTTTCAGTTAATGAGAAGGGAAGGACAAGGAGACAGAAGTTGAGAGG  
GAAGAGAAGTAAGAATATGTGTTAACCCTCTTCTGTGTGTTTCTCAACTG  
AAAGTCAGGCACTGGGTACTTTTTAAACTTCTCTTCTTTGGCATGCAGAA  
GATACAGCAAGGAACTCTTCAATAAAAACTTCTAACAGTTTTATCCCTC  
TTTCAGAAATGATATGGCTATAATCATACTAACACAGAAATGAAGTCAGA  
AAGGAGTCAGCAAGCACCAGGTCTGCTCACACTTTCACAGATACCACGGA  
TAAATCTAACAACCTAGAGATAGAACCTATAATCACATAAAATCGGACTTG  
AATTCAGGTCCCCACACTTCAAATCTGAAGATCACTTTCAGTATACAAT  
AGATGATTACTCCTCAGAAGAATTGGTGATGAAAAAAAAAAAAAGAAAGA  
AGAATTGGTGATGAAAACTAGTAGAAAGAAAAACCCATCTCAAACCATT  
TCACTATAGCACATTACCTCTCTATTTTGTGTCAATTTCTCACCTCACATA  
TTTACCTTTTTTTGTTGTTGAAAAATATTTAAGTTTTTACACTCAGCAAATT  
TCAACTATAAACACCATGTTCTATCAGATCCTCAGGTCGTAGGCACCTTA  
TAACTGAAATTTTATACCCTTTTGTCAACCTCTAGGTATTCTCACTTTAC  
CCCAGCCCCTAGCAACCCTTTTCTACTCTTTTTTACAAGTTTGACTTTTT  
TTTTAAGATACCACCATGCGGTATTTGTGTTTTTCTGGTTTTTTAACTTA  
GCACAATTGCTACTGAATTCATCTTTGTTGTCTATAAGTGACAGGACTTCT  
TTCTATTTTAAAGGCTGAATAATGTTCCATTGTATATACTATAACCACATTT  
TCTTTATCCCTTCATCCACCAATGGACACTTAGGTTGTTCCCATATAATACC  
TTGGCTACTGTGAAGAATGCTATGAACATAAGATTACAGTTCTCTTTGAG  
ATAATGATTGTGTTCCCTTTGGAACACCACAGATTAGATTGATAGGTCCC  
ACAGTAGTTCTAGCTTACACTTATTGGGGAACCTCCATATTGTCTTTTCA  
TAATGACTGTACCAGTTCACAACCAACAGTATAAAGTATTCCCTTTCCCC  
ACATCCTTACCAATGCTTATCTCTTGTCTTTTCCAGTGATTTTGTGGTT  
TTGATTTGCATTTCCCTAATGATGAGTGATGTTGAGCACATTTTGATGTT  
GGCTGTTGGCCACTTGTATGTTGTCTTTGGGAAAATGTCTATTGAAGTCC  
TCTGCCCATTTCTAATTGGTATATATATATATATATATATATATATAT  
ATTTTTTTTTTGGCTGTTGTGTTGTGAAACCATCTTGTGTATTTTATATA  
CTAACCCTTATGAGATACATGGTTTGTACATATTTTTTCCCACTCCATA  
TGTTGCCTTTTTTCAATTTGTTGATGGTTTCTTTTGCAAAGCTTTTTTAGTA  
AAATGTAGTCCCCTTTAGTTTGTCTTTTGTGCTTTTGTGTTTTTGGTG  
TTAAGTTAAAAATAATGTATTTCAAAAAAATATTTTAAAAATAATGTGTT  
TCCAAGACCAATATTAAGGAGCTTATCCCCTATGTTTTCTTCTAGGAGTT  
TTATTGCTTCAGATCTTGTGTTCAAGTCTTTCATTTCGTTTTTTTTCTTAAG  
CTAGCCATGGTCAAATTCTGTGGCTCAAACTAAGAATTTTCATGGACAG  
GGATTCTTTGGGGTAAGATTCTTCACTTCATTTCCACATCTTGCTGTCCA  
TAACACAGCCTAACTTACAAGTTAGGGGACTCTGGGAACACAGATTAAAGT  
TGTCAGAATGATAAGATAGCTTAATTGGTCAAGTAGGAGCTAAAAGAAGT  
GATAATCCAGTAGGACTCCCCTTTATAGCAATGAGAAGAGAATCCAATGC  
ACAGATTTTGAGACAATGATAGAACTGGGATTGAATTGGGCCAATCTTCC

TAACAAAGGGGTAAATCCAGGATGTGAAAAATAGCAGGACCCTGGAGGAG  
AAGGGTTTCTTTAGGTACATCTTTCTTGATAATTGAGTAATTCACAGAAG  
AAAAGCTAATATTGGAAGCACAATGAGCAGAATCCAGCTACTCAGAAGAG  
TTGGCAGGCAAGCATGACATCACAACATTGCTATAATGCCAGGAGAGATC  
CAAATAGTTTCAAGAAAACCAGGCAAGAATATTGCGCTCTTAGCCTGAGC  
CAGCAAGCTGGGAATGAGGAAGCTTGTGGGCTGACAGGGATCACTTAGTC  
AAGTGGACACTGGGTAGATGCCAGGTAGATGGAGTATAGTCAGGGGCATT  
ACTGATTCCACTCAGTGCTCGCTCTGAGGATTTAGATGTATTTCTTGCTA  
TGACTTTGAAATTAGGCAAAGTTGAAGAAGTTTGCTTTTTTCATTTGGCTA  
GGGTTTGAGAAGACTGTGCTGATGAGGGCCTTGATTAATCATTATTGTG  
GCTCATTTCTCATCAGAAGGCGATGGACGATGGGCAAACCTGTTCTCAGCAG  
ATTAGAAAATCAGATGTCTATGGCATTCAAACCCCTGCTTCACCTTTGCA  
CAGCACAGGGCAATACTGGTCTTTATACCTGACTACTGACTACTTTTGGA  
TTCAAGCGGTCCAAAAGATGCCCTGAAAGGTGTTCTAAAACCTCATACAC  
AGAGTTATTACTGGATTTAATGACCTCAAAAATATTGACATTAGGAGGGG  
AAGAGAAAAATCATAGACAACCTCTGGAACAGAGAAAATATTGACGTAGTC  
AACTGATGTTTTTAGTTACTTAAACATCACAGATCAGATCCAGTCTGTGC  
TATGACATAACTACATGGATGAGCTGAAGACTGATGTAGCACTGAATGCA  
CCTCCAACCAGAACTTGACAATGACCAGAGACCTATGAAATTCTTATTTT  
TTGATCATATTGTATTCTTCATTTCTTGGTCCTTTTTTTTTTTAATTAAT  
CTTTGCAAGGCAATATTGTTTCTTTCTGACCTCATGGGACTCTGCCTTCT  
TTGGCATGGAGTTTCCCTGGTTATGTTTTTCAGGATACTCTGAAGGACACG  
AACAAATCACATAACAGAAAGGACACAATCCTCATTCATGTTCCAATTAGG  
TTAGTGCACCTCAATTATGTTTCTTGTCTCCTGTTGTTGTTGTTATTA  
CCCTTCCTGTATTTGTTCCCAGACACCTTAAAAACATGAGTCAAGATCAC  
TTTTTAGGTGATAGGAAGGTGGGAAAGGGGAAGAGGAGTCGGTAAGAGGG  
CATGAAGAATTTTGCTTATTTCTGTATTAAATTTATTAAGCTTAAATT  
TTATCCCAGGGTTCTACATCTGTTGCATCTGTACCTTCATTCTTGATTT  
AATTGCTGAACTACATGATAATCAATATTCAGGCAACACTGTTTGTATT  
GCAATAATTTATTTACTGTTTTCAGTGTGCGGGGCTTTTTATATGCCCTC  
TGTGTCCCATCTTTTATGCTTTAAATGAGTCCTTGGGAGGAAATCTCTTA  
TTTATACAAAGAGAGAAAGATCCATACAATTCTTATTTATTAGAAATTCA  
TATCTAATTTTCTCTTTGTCCCCCTGAGGTGTGTGCATGTTTCCACAGAT  
ATTGTTAATGTATCACAAAACCATGCAATAATTGCCCTGATCATATGGAA  
TTTTTTAAAGGAGGTATTTAGATTTTTTACAATTCTACTAACCAAGAGCAG  
CAACTTTTTCTTATAAAAGCTAGATTGTAAATATTTTCAACTTTTCAGAC  
CACATGATCTCAGTTGCACTCAGATCTGCCACTGTAGTGTGAAAGCAGCA  
ATAGACAATATATTAATGGATGAATGTATCTGTGTTACAATAAACTTTA  
TTTATAAAAATAGGTGGCTGATCATATTTGGACTACAGTGTATAGTTTCT  
CAAATGCTGAGCTTGAGTTTCACTCTAAACTCACGTAGGGTATGACTCCC  
CAAATAAAGGTATATAGATATAGATACCTAGAGGTTTTCTTTAAACTAGA  
GTTTTATGAAGAAACAAAAATAAGATTTAAGGAAGGTAAATAATAGATT  
GCTTGAAATTCACTGAAGTTCCTGAACCATCTGCTATGATGAAAACCTGC  
ACACATTTATTGAAAACAAATGGCAGGTACATTGAGATGACTTCAGAATT  
AGTTTCCCTCTTTAATCCTTAACCTCATGAGAAATGGAGTGGCTCTGGAA  
CATACAAGTTGCTTTGGGAAGCACTGTTTCTGGCCTCAGAATCATTCTCA  
GTGATCACAGATGTGTTCTTTGCCTAATTATCTCTGATCTCTGATCTCTG  
AGATCAATACAGCAGATGAGCATTTGCAGGATTGTGGTCTCTCTGTGCGAT  
CCTTGCTCATCTACATCTTAAGACGAGCTGCATGAGTGTAACATATTTA  
GTTGGGAAAGGATACTTTCTTCTTGAAAATAGAATTAAATATCAAGTTCT  
TATTATACAGAAACATTGCTCATCTCCTGTGTAAGAGCATTAACACTGAGA  
GTGTCCCAAGACATACTCCCTCAGACACAAGTGTGAGCTTGGGAAGCTAC  
TCTTAATTGATTAATGTCCAGTATGTGTTCTTTTCCCTTACTGATGTCTC  
CTCAGGAAGAGAGAGGGCCATCGAGGTCTTGCTACTCAAAATGTGCTTGG  
TGGACCAGTAACATTGGCAGCATCTGGGAGCTTGTTACAAATGCCAAATC  
TCAGCCCCTACTCGGAGTTCTTTAAACATAATGTGTATTTAGGAAGTTTC  
CCCAGGTTACTCATATGTACATTAAAGTTTAAAAGCAACAGTCTACATAA  
TCCATATTTCCAACATATCTTAAATCAGTTGTAGACAAGGCATAATGCAAA

TAAATGAAATCACAAAAGAATGAGTGAATGCATGTCATTATTAAATGAGC  
AAATGTTTCCATAGATATATAAATGAGTGAATGAATGAATAACTTTCCCT  
GAAAAATCAAGTTTATAGAGTGACTAAGTAGTTTCATTAAGATGAAGTGA  
AGTTAATTATGTGAAACCCACTCCCAAACAGTAAAGACCTACATAAAAGA  
CAGTCTAGCATTGATAATACAGGCCATCTGGTGACACATCGCTGATAATG  
CATAGAACCCAGTAATAAAGTCTCCAATGCTTACATAATTATGTTTCATTT  
ATTGTGCACGTAGCTTAAAAATCTCAGCCTTCATTGGTAAAAATGCATGGG  
AAAGTGTTTCATTAAGGACATTGGTGGGTGACTGCATGTTATTGTGTATGT  
GGCCATTTCCAACCTATTGTTCCCTTCTGTGTGAATTGAATTTTCCTGTGAG  
CGCTTGCTCTTTCCCTCCCCCTTCTCTCACTCCCCCTCTCTCTCACAC  
ACACACATACAGACACACATCTTCTAGCAAATATGTACAACTCTCGATCT  
CTCCTCCATGCTGGGGAATAGAACAGAGTATCTTCATCTTTGTGTACGAC  
AGAAAAATCTTGGCTTACCAGTGTGGTTGACTGGGAAATGTCAGTTTGAA  
GAGATGACATTTTCCATCCTTTGGAATGAAAAATACATATTATTCAGTTC  
AGAAATACCCCTTATCTTCAGGAACAGATCATTCCCTCCTGTTAAGAGTGTG  
CATTGGGAAGGTTTTAGGCCAAAGTTCAGCTCAAAGAGATAAAAACTGCAT  
TAACTCAATTTTAAAGATATACAGTTTATTCTGATAGGCTGGAGGACCAC  
TGAGCTAAGGAACAGACAGAGTGTGGAACAGTTGGCATGGAATGCCCAGG  
AGTCAAAGAAATAGCACATTTCAAACTTGACCTTGATGATGTTGAATAG  
ATGGGCATGTAATGGGCGAGTGTATATTGAGGTGTTTACACTTTAGCTG  
TGGTTTAGATTTTGCACAGGATAATAAATTATTGAAAACTGTTTATCTCC  
AATACATTGGCAGTTAGCTGAGGAAGGAACCCAAATTCAGAATAAACTGA  
AATAATTCATGTTAACAAGTTCTCCAGGTCATTTATATGCACAAGAGAAT  
ACAGTAGGAAATGGAAGGTGAAACCCAAAGACAAGGCTCGACATTTGCA  
GTCAAGAAGGGTTAAGAATAGAGGCTATATTTTAGTTTGAACTAGAACC  
ACATATTTAAATATAAATATAAATCACACATCTAAGAGCACACATGTTA  
AATGAAGGTACTGCTTGGATATATCTGGGAGAATATAAAATTTTGTAGCAC  
AAAAATATTGGGTAAATTGAATATATTTGCTAGACCTTCAAAATTATACT  
GACTACAATAAAACATTTATGAAACTAGGCTGTTAATAATTCAAACCTAG  
AACAAGTAAAATTCATAAATAAGATAAACAATTTAAAAATATTTAAACCAT  
TCAAAATTTAAAGGAAATGACATTTTCACCCCTCTTAAAAAACACATTTA  
AAATTCATCCTCAATCAATGTTAAAAAAGGATGTGATAAAGCTAGCAAAG  
TTATTTAATGCTGTTGACACTATAAATTGATTAAACCATTTGAGAAATAC  
ATTTTGAGCTACATTTAGAGAAACAACACATTTGTAGGAAATCATCCCAA  
AGTAAGAAATATATGAAGTGACTTATTGCATTTTGATATGCAATAAGAAT  
AGAGGAAGTGAAATTTCTCACATTAAACCACATAATCCAGTGAAATAT  
TGCATGACTGCTTAATTATTATGTATACCTGTGATAATATGGCAAATGCT  
TATACATTTTAAAGATCATAAATGAAATTGAATCAATGAAGATTAAATC  
CTTAGAATAAATGTAAAAAATATACAAGACTATATGAGGAAAAATTTTAA  
ACCCTATTGAGAGACATAAAAGTAGACTAAAATAAACGGAAAAAGTACTTT  
CTGTTCTTAGATAGGAAGATCAGATATTACAAGAATGTCAGAATTCCCTA  
AATGGACTAACCTTAAAAAAAACACAATCACAAATGTATTATATTGGAAAA  
GCTTGGGGAATTTGGCATTGCCGTGAATTGCTGTCAAGAATCCAATTTTG  
CACCTTCTGAAAGAAAATTTAGCATCACCTAACAAAAATATATTTACACT  
TGCCTTTTGACACAAAATCTTACTTCTATGAACCTTACCCTGAAGATACAT  
GTACAATAGTATGAACTACATATGTCCAAGGTTATCCTTTCCACTGTTG  
TTTAGGAAAGATGGTCTCTTTAATAAATGGTCCTAGAACAAATGAAGTAAC  
CATTTGAATAAAATCAATAAAATTTGTATTACATACCTCATGCCATACATAA  
GAGTAAAGCCCAACTGGACTGGGGATATAAACGTGAGTATTAAAAA  
AGAAAAATAGAAATAAAGTATGCAAATAATAGAAGAAAAACATGGATGAATT  
CCTTTTGTAGCTTTGATAATAGAAGCTTTCTACAATTCATAATCAATAGGC  
AATAAAATAAAACTAACAAATTTTCATGAAAACAAAAATTTTGCATGAC  
AAAACCACATAAAGTCATTTAAAAAATTGATAAGGAGAAAAATATTTATAA  
CATGTATCACTGAAATATTGTCATATTTTGCATATTTTAAATATTGAAA  
CCAAATATTTCTGGGAAAAATGACTTGTGGAACAGGAAAAATTTATTAAC  
AAGGAATTCATAATATAAGGTAAAAATGAGCATCTAACATTTGAAAAATA  
CTTATAATTAAAGAAATAAAATGTAAAACACTGAGCTACTATTTTTTACC  
TAATGGACTAACCATAAAAAATAAATCGTAATGTATTGCATTGGAGAAGC

TCGGGAAAATTGGCATTGCCATGCATTGCTGGCAAGAGTGCAACTTTGCA  
CATTCTGAAAAAAAAAACAGCATCACCCAACAAAACCTATATTTTCACTT  
GTCTTTTGACGTAACAATCTCACTTCTAGGAACCCACCCTGAAAATACAT  
GTACGATAGTATGAAAGTACATATGTCCAAGGCTCTTCCTTCTGGCACTG  
TTTGTAATTGGAAATAACTCACAAACCTAAATGGCCATACTTAGGAAGGT  
GGTTAAATAAATTATGGTGCATCCACCTAATGGAGAGCTAAGCAGCTGTT  
AAAAATGGATAAGATAAAAAAAAAATAAAAAAAAAATAAAAAATGGATAAGA  
TCTCTGTGGAATGATATAATGGTAAGAAAAAATATATTCAAAGATGAC  
CTAGAATATGCTAGTCTTCATGTAATAAGGGAAATAAGAACTAGACGTG  
TATATTTTTATTTGTAAACATAAAGAAAAGATCAGGGACTAAAGAAGAT  
GGGTCACTTACAGAGGGATGGTTGAAAGAAGTAGAAAGAAGGAGTAAACA  
GGAATGGGGTTGTAAGAGTGAGCAGAAATGCTATGACATTGTGTGTATCC  
TTTTGTGTAGCTCTGATTTTTAGAGCCATTGTAATTAACCACCGTCCCTA  
ACTAATGCAATATTAATAATCAACCAGAATGTACTAGGAAAACCTCAAAAT  
GTAATAAAATTATATCAAATGAACCTAACTGTATTATAAATAAATTATAA  
AACCATATTGGAGGAGTGGGAAGGAAATAAGTAACATAAATAACTTTAGG  
AAACAATTTGTTGACTGAATCCTCTACTCTAAAGATGAAAAAACTGAGG  
GCTCCTAGATAGCTCAGTTGGTTGAGCATCCAATCCCTGGTTTTGGCTCA  
GGTCATGATCTCAGGGTCATGGGATCATGTCCTGTATTGGGCTTGGTGCT  
GAGCTTGGAGTGTGCTTGAGATTCTCTCTCTCCCTCTCCTTCTGCTCCTC  
CCCCATTCTTGCTCACTCTATCAAATAAATAAATAAATAAATCAAAAG  
AATTATACATAAATACTAATTCATTTAGTAAATTTATCTCTCACCTTTG  
TGAGTATCATAACATAACAAAAATTTTATGTGAGTATCATACTGAAGGAA  
CAAAAGCCTTTTTAAATGTAATGAGAGCTGAATGTGTCACTGGTGGAGGA  
AGAAGTTACGAATAATGAAAGAGGAAGGCTAAAATGAACTCTGTGGCACT  
GGATTGGAACCAGAGTTATCACTATGAAATCACATGCTCACGTACACACA  
GACACAGATTTGTGTATATGTGACATTAGCATATGGCATACATTTCCCA  
GCTCTGTCTTCTAGAAGGGCCTGAGAGCAGTGAAACCCTGATAATGATGA  
GCACCACTAGCACCCAGACATTGGTTCCTAAACATCATTTTCCAATCAGA  
GGAACCAGGCTTCCTTGAGGAAGTGGTCAATTGCAGGTCTAGGGCAGAGA  
AAATGCACAATGAGCCTGGAGTGTGTTGTAATACCAAAAAATAAGAGTGTGT  
TCAGAAAAGGATGAAGCATAGTGAAAGGTCACAGCATCCAACTGAAGGG  
GGTCCTAATGGCCAAATATAGAATAATCTGAGCAAAAAATAATGATAATAAT  
TGCATTGGACTATCACTCATGGAACAAAATAATCATCCATGAGCCCACAC  
AAAACCTGAGCAATTGAATGAAAAATGAATGTCTCAGAAGGGACAGTTCCT  
TCTTACATAGGATTTCTATTTTTTTTAAATTAGTTATAGAGCAGAAGCAGG  
GGGAGAGGCGGATGGTAGTAGACAGAGAGAGAGAGAGAGAGAGAAAGAAT  
CCTCAAGCCAACTCCATGTGAGCATGAAGCTCTATGCTGGGCTCAATCTC  
ATAACCTGAGATCATGACCTGAGCCAAAATCAAGAGCCAGAGGCTTAAC  
CACTGAACCACCCAGGTGCCCCCATTAATTTCTATCAATACAATTAGGA  
AAAAAGAAGGGAACGGAATATCACCTGCAGGTAAACATCACGGTAATAGT  
TGTTGCAGGCAACATCTACCAATGAACACTAAAATTATTAAAATTATGTA  
ATTTTGAGAAGAATACTATATTCACACAGCCTCAAAGTATCTTCCTCAGG  
ATATTTATTACATTCTCCTGGATACACAAGGAAAAATGATAATTTTGCAG  
TGTATAAATTCACCTAAATCAAGAGATCAAGTAGTAACACACAGTATCAT  
GAGTGCCATGATAAGATGCACTGAAGAGAACACAACGTTACTTCTATGAT  
GTTTTTGCCCCAAAATATAGAGCTTCAGTCTAAGGAAGAAAGAAAAGTATG  
GACAACCGCAAATTGACTTTCTACAAAACAGCCGACCGGTAGTCATCAAA  
ATTGTCAAAATCTAGAAGACAGGGAAAGATTGAGGCATTGTTACAGATTG  
GAGGCAACTCAACAGACATAAAAACTAAGTATGATATGAGATCCTTAATC  
AGATTCTGCAATATAAACAGGATATATGTAGAAGAACTGGCAAAATGCAA  
ATAAGGTCTATAGTTATAGTATTTTGCTAATGTTAATTCCTAGTTTGATC  
ATTTTAGTACGTCTTATAAGATGCTAATGTTGGGGATGCTGAGTGTGTT  
AAGGGGATCTTTGTGTTACTTTTGTAACTTTTCCGTAACCTCTAAAATTAG  
ATCAAAATTTAGAACCTTGAAGAATGAATCTATACTATGATTTCTCAGAT  
CTATGGCTAACTAAAACTTGGTATTCAAAATTTTGATAAAAAATTTTAAA  
ACAACATGGAAGAGTCAAAACAGGTGTTAGAATGATGGATATTGAGGATA  
TGTATATAATCGTATATTTAAAACCTATTGTCAAAAAAATAAATAAAT

AAAAC TATTGTCTGCAGTTTTGGATGTGATTTGCATATGGCGGGATCATG  
TCTATTGCTAATGGTTCCTGCAGGACAGGAGCATCATTGGTAAAGCCTAG  
TGAAGATTTTTGGGAAATGCAGATGTATAATTTACATAATCACAGCATCAG  
AAGCTCTACATTTGGCAGGAGCCTTGGAGAACCTTTGGCCAATACAATAT  
CTCACAAGAATAATTAATAATAACAATTGCTCAGTTTTCTCTAATCGC  
CCATATACTGTCCTCATTTTAAGCAACATCTAACTTCACTCTCTACCTTT  
ACTTCCTGAAGCGTGTTTCATGCAACTCTTCCTCTAAACTATCTAAGATG  
CTTCTTATATTTCTCAACTTCTTTGGAACCTATTATCCATTGTTATATT  
GTCATCAGAGACTAACTCACTAAAATAAAAACTGAAAATGGAATTTAGGT  
GTTATCTTCATAGTAGTACACTTTTCGTGGAGAATCTGGTGTTAGCCTAAG  
GCAATTACTAATAGTAGAATATCAGGTTGTCATAATATTTGGCTGATGTG  
GATTTCTGAAGAGAGGGATAATTATTTCCGATTAGCCCCAAGAAGACACA  
TATGCATAATAAAAAAGCTCACATTGCTTCTTTTTTGTGAAAATTGATT  
TGTTTTTCTCTCCAGCAAGACAGAACAGCAATAGGATGGCATTTCCTTTCA  
GAAAAAATGGATCTTGAAACACTAACTCTACAGTTTATAAAATCAGAA  
ACATTTCTCAGAAAGTAAAACAAAAAAATAGTTTATTTTTATTTCCTTCA  
AAAGTAGTTAGTGCTTATTTTGTCTGGGTAGTATAAGGGAGAAATGTATTA  
AATGAGGGAGAGGAGAGGGTTCTCAGAACTCCTGGACCTCACCACCTCAC  
TCCATCCACTCTCTCCCCCAAATGCTCAGATAATGATTTCTGAAGATAT  
GTTCTGGGTCATTTTCTAGTAGATTTTGCTAACACTTGGCTACAGAGATT  
TTATGAAAGTCTTTTCACTGCCTGGGAGAGATCAGAAGAGAATTCATGTT  
GCTTTTGGTTTGTATCATTTAAATACCAGTGCTCCTTTTGTGTGCCAAACC  
ATACAACCCTAGGTGCCATGACATCCCCTTCTTTGATCAACCTTACCAAC  
CTCCTTTCCATTCTCTGCAACCAGTAAAATTATTCTTTCTTTAGGCCTTT  
TGCACTTGCCATTTCTCCCATCAGGAATGATCTGGTGGCTCTTCCCATGG  
CTGGTTCTCTCTCATTTTCAAGTTCAGTCCAAATATTATTTCCCAGAT  
AGACTCTCTCTGCATAACTCCCTATAAACTAGACCTGGCCCCATCTTTAG  
AAATAGTTTTCTATTACAAAACACCCTATTATCAAGGTACTTGTGAATTC  
CAAAATCACCTATTTAGTGGTCTTTTAAAAAATTTTTCTGGTTTATTCCC  
CCTATCGCCATGAAAAAGCAAGGGCTATAAAAGTAGAGGCCATATCTGCT  
TACTCTGTTCTAGACATTGTCTTAATGGTACCTCTTGGAAGTTGAAACTA  
TTACCATATTAAAGCTGAGAACTTGTTTCAGAGATTAAAGGTCATATAG  
CCACAACCTCAAATTCAGGCAGAGAGAGTACTCTTAGCCACTTTATTGAAC  
ATCAAGGATTCGATAAAATCAGGTACATGATATACTTACTACAAGATCGG  
GCACATCGCACTTAATAAAATAGCTATGTGATCCCATAAAATCCTCAGAAT  
TGCCCTTAGGGAAAACATACCTTATCTTCATATATATAATATATATAATAA  
ATGAGGTCCTAGTTGCAACTAGAGGGGTGAAATGATTTGCCCAAGGAAGT  
GGTAGAAATAGAGTCAACAGCTTGACCTGCTTTGCTTAGGTCTTTGCCAA  
GACACTCAATCCCTGGTAAACGAGGTCAACCTGCTGGAGTCCATATTGTA  
ATTTTATTTGACTCCCAAACACTTTCTCTCTTTCTCCCAATATTATATTA  
GATAGGCTTATACCTCAAGACCTATGCTGAATTTAATTGAGTTTATTGAA  
CTTAATTTTCCCCCTATTAAAGACTAAATTTTGGATATTCCTAAAATAACA  
GAAAATTTGAGATGTTCAATTTTGTGACAAATTCATGAAAGCAGTCTTGTA  
TTAAATCAATCCTTAGAACCCCTGGGAATTGTATTGTTGCAAGCACAGCAT  
TATGTACCAGCAAACAGCTGGCCCAGCCACACAGCCATGTGTACTTCCAT  
GCCGAAGGGAACCAGGTGATTGCTCTGACATTGCCAGCATTTAATTGAAG  
TCTTTTAGACAGACAAGATGTTCTGTGAGCTCTGTTCAAGGTCTACTCC  
AGGACTTCACATAAATGAGCACAGTAATTCTAGACAATTAAAGATAGACT  
AGGAACACTCCCTCACAGTTGAACCTCAATATCACTGTCAAGGGGACATT  
AAGAAAAAAAAGGGGGGGACATTAAGGATGGGAAAGTTTTTTTTGGGCAA  
AGGATTGAGATCTTTTACTGCTTTTCAAGAGATTGAAGAGCAGAGAGGAC  
ACAGGGAATTATATAAAACAATTGTGTCTAGGTGGATAGAGAACCCTTC  
ACACATGCCACTTAAGGCACCTTTTGTGTGTGTGTGTGTGTGTGTGTGTGT  
TTTTGTGTGTGTGTGTGTGTGTGTGTGTGTGTGTGTGTGTGTGTGTGTGT  
AATAATTGTTTTTGGGAATTCTGCAGCACGTCTTAACCTTTGATGATAAAGA  
ATATATTCTAAGGGCACTAAATGTCCAGATCAATTTTCCCTCCTGTTTAT  
AAGCACAGGATAACTGCAGAATCTCTGATTTACCTACTTGGAACCTGTCA  
AAATGTTCACTTTCTAAAGAATAATCAATCAGGGTCTGGAAGCTTATCTG

TGAGCTCTGTGGATTATCTCTAGCATGCAGAACTTTATGTCACACCCAGC  
TTCATCATTCTCCTTCACAACCTACTAACCTTTATGTTCCCTGGGATTTCT  
TATGCAGATAACAGATCTCCCATTTCTTTAAGTCTACTGAAGAGTTTTTAA  
TTCCAAGATTCAAAGTTGGTTAGATTCCCTATGAAAGATATTTAGAGGTA  
TTATACAATTTCCAATCACCCAACCAATCTCTTAAACATTATGCGGTTCC  
AGCGCTTTTAAAGACTTGATTTGCTTGGTACTATTAGTTCTGTATTAGCC  
AGGAGGTAAACAAGTACATCGTACACTTTTATGGTTATTTCTGACAAAAT  
TGTATGGTATGAAGTAGTCAAGAATACAAGTATGATACAACAGTGAATTACA  
GGCCACAAATAAGATATTTATACCCATGATGGCACCACAACTATTTCTTAA  
TTTATACTAATGTAAGCTACGAGAAAGAAATAAGAAACAAAATTTATTAT  
TAGCTTCCCAGAGTTTTGCATAATTTAATAATCACTCCATTTTTTTTCTAA  
CATGTTTTGATTCTGTTTTTTTTTCTTTTTTATATTTTCTAGAGTTAATAACC  
TTTGCCCTTCAACATCTACACTTTGTGTGATTTTTCTAGCTTTGTTTTGA  
TAAAGAAAGGATCCCCATTTCCCTTCAGCCACTTACTCTCCATATTACCT  
TGGGCACATCATGTATCAAACTCTCTCTCTCAAAATGTTGACAATTATAG  
TACATTCTTCAGAGTTTCCAAGAAGACTGAGTTAGAATTTAAGTAAACT  
CTTAACATATTACTTAGCAAGAAATACAATATTACTACCAACTGTAAAGA  
GAAAAAAATAAGGCTATGCTTTTAAAATGACTATTGCCAATGATGATAA  
ATTTTGAGCACTTACTATACATTTATACTGTGTGTTTCAGGTATTTAGGA  
TCTCGTGTAATTTCCAAGAACAGGGTACTATTAGTATTCAGTTTTACAGG  
TGTAATAAATGCTAGGCAGGGAAGTTAAATAACATCCCCAAGGCCACAT  
AGCCAATAAATGATTGAAATCATGATTCAGACTGTGTTAGACTAACTCTG  
GAGTCTACATTTGTATCCATTAGGCTATGCTTCTTCTTATACCAGTAATA  
ATTATAAAAGAGTGATATCAGGGTTCCCAACTGGACACTTTAACAAAAA  
ATAAAAAATAAAATAAATAAATAAATAAATAAATAAAGAAAAAAG  
AAAAAGAAAAAGAAAAAGTAAAACTAAGTGGGAGCTCTTCAAGGTAGTA  
ATCAAGAAAGTGCTTCACATTTCTAAGGCAAGATCAGATATTGAAACCTAA  
GTAGGGATTATGGGTGACACAGAATAAACCAAAACAGCTACCTGACATTA  
AACAAATACAAATCAATCAATCAATCAATCAACCAAGTAGAAAAATAATA  
TAAGTTATAGTTACATAAATATGTAAGTAAATATTCAGAAGTTGGAGGCA  
ACAGAGTATTGATGTATGTATATATATGAAATAAATTATATGTAATA  
TATACATATATAATTATATGTAATATATATTTGTGATAGCAATGTATTAA  
AAGGTACTATATGAAAATACAGTGCATTTGATCTAAAATTATCATGTAAA  
GTGAGATCAAATATTATAAATATTTCCCTTTGAAGATCATTTGTATCACCC  
AGGATATATTATTAGTATTCCTCAAATGACAATTAAGACCCCTAAAGAAT  
ACATTGCAGTTAACTGGTATACGTACACATATCATTGTTTATACTGAAAT  
ATTTTGAATGTATAGTCTACCGATAAAATGACAACCTCTGGGATTATCAG  
AGAAATTCATCTCTTCAGCAAGTTCTAGCAAGTCTACTACTACTTTAGTT  
CTTTACTGATCTGACTGCAGACCACTCTGAATCTGTCTGGAGATTTCAA  
GCATTAACCATCATTCTTTCCATCTTAATTTGATCAGCATCTACTAGTAT  
CCCTCCAATCTGGAGTGACTTCTGAGAGACAAGTGATTTTACACAACA  
GAATCGTTCATAGCTTATTGATTGGAATTAGAGGCTGGTATGTAAGGATG  
CTTTGCAATTCCTAAGTTTCTATATATACTGAATTGAATTCACCACTGCC  
ACACATGAATAAGAAAGGATCTAGGGGGTTCCCTCGGTTGCTCAGCCAGTT  
AAGCATCTGACTCTTGATTTGCGCTCAGGTCATGATCTCAGGGTTGTGAG  
ATGGGTCCCCGTGTAGGGATTCAAGCTCAGCATGGAATCTGCTTGAGATT  
CCCTCTCCTTCTCCCTGTGCCCCGCCCTGTGTGCTTGCTCTCTCTCGCT  
CAAAATAAATAAAATGTTTTAAAAAAAGGTTCTAAATAAAGCTAAAATTC  
ACCTTTTGAGTGATAGGATATTCAATCTCAATTGTTACTGGTCTATCTCC  
CTTCACCAAAGAAAAGTAAAGGAAATATATTATGCTAAAGAAGGCTCTCCA  
GTCCCTCAGTGCAATGCAGTGCTCCATGGGTCACCATCCAAGCTGGTCCT  
CTTGTTAGGAGTTAATTGGACAGTTAGGGAGTTGGGGCCAGGATCCCCAA  
CAAGAAAATATGGAGTCAGGACAGCTAAGATAAAACAGCACTGATACTCT  
GCTTTGCAGCCTTTGCATAAATGACTTCTGAAAAATGTCCTAAAATAAGA  
CAACCGCAAAGCATTTGTCAATATCATAGGCAAGAGGCAGTTAAAACCTA  
CAACCCAGATGTCAGCAAAAGAACACCATCAGCATGTGGGCATTAACT  
AATAAGTTATATGACCAAAGCCCTGATTGGCACAACCTCAGCACACCCTGA  
TTGCTTAAGATAGTTCTGCAAGAGTTCTATAAAATCCCAATACTTAGAA

ACTCTGGGGGCAACCCACTTAGGTTGGGTTGCCTCTCCAGTAACTCTGTA  
CTCTTGCTTAATAAACTTTGCTTTGCTGCCCACCACTCTTCATTTGATCT  
ACCTCCTCATTCTTCCAAGTGGCATGACGGAGAGCCACAGGCACTAAATG  
GGACAAAAATCATATAACACCCCCCTGTCATGGCTGTGTCTCCATCATTT  
CCCTTGAGTAGGAGGACCCATGTCTTAAGTAAAAATATCAGCCAAATATC  
CATAAAATGGGAACAGTTTGCATGTTTGAAAAATATTTTAAGAGTATCTG  
TGCTCAATATTCATAGATATGCTTGGCTTCCTGTAGCATAAAAAATAA  
CTTCACTCAAGTAATTGTTAAATAATTAGAACTATGTGTTCCCTTTCTGCT  
GCTACCAAAATGAAATCTATTGGCAGTTGACTAAGGAGATCAGCTAGCTA  
GATTGGAGTGGGGGGTGAGGGGAATCAATTGTTTCATACATATTATTAGG  
GACACTTAAACAATTTTATGTACTTTGTAAAAGATGTTGTAATCAACTTA  
AATGTTTCCAAAACCTTCTTCTGTTTCAATTTTTAATGGATACGCAGGAACA  
GATTTTATTAATAAAAAAAAAAAGAATTCTGAAAAATAAAACATTTTGCA  
GGGGTTCTTATAATTGACATTCAAAGCAAATTAGAGGTGAATTTGGATGA  
AAAGTAAAGGCATCCTCTCTGATTGAGGAAACACCAAGATGGGGATTGGG  
GGTGGGTGGGTTACACATTGGCAAATACCACATAATGAACTTTATGAATG  
AGGGAAGAGAGACCTCGTAGGACTTTTACGTTTGAAGGCATATTCTAAGG  
CACAAATACAGATGAATCTGTGAAATGAACAGGAAGCAACCAGATGTGTG  
CATGTCGCTGTCAGCAGACAGAGAGACCTGCAGAAATGCAGAGGGCATA  
CTGCCCCCTCATGTACATCAGTAGTGACCAAACATTGGGAAAGTGTCTGC  
TGAAATACCAACTAGGGAACCTATTATGCTTAAAAATATTGCCTTGCACTT  
GCCTGATAGCCTTGAGCTGTTCAAGAAGAGCATGGTCAGCGAGGTACAG  
AGTGTGTTGTTCTCTCTGTTTTCCAACATGCATGTCACGATGAGTAACACAA  
ATGGCATTTTTTCTTGATTAGACGTTGTGTTTCATGACTATTGGTTTACT  
GGCTCTCACAAACAGTTTGTGTGGAGGGAGTTTTATTAGCTCTGTTCTAC  
AATAGCAGAACTGAAGGTTAGTTTAAATGACTTGCTTCATGTTCTCTCC  
ACCTCTCCAAGTCCACCATCCAAACCAAAAAACAAAAAGGAAAGAGAA  
AGAAGAAAGAAAGAAAAAGAAAGAAAGAAAGAAAGAAAGAAAGAAAGAA  
GAAAGAAAGAAAGAAAGAAAAAGAAAGAAAGAAAGAAAGAAAGAAAGAA  
AAAGAAAAAATACATTGAGGAAGCAAGATTTTCAGCTCAGCCTTGAGAA  
TTTTAGGACATAATTCTATACTTATCAAAATTCTATGGTGTGAGATTTTT  
CTTTTCCTTTTAAAGTCTTAATAAATAAAGATTTGTAAGTGTCTTGAGCAG  
CCACATGCTTCTTTCTGTATCTCAGCTATGCCTACAGAAAGCCTCAGTGG  
TGTTGTTGTTTAAAGATTTGATTTGTCTCAAAGAGAGAGAGGGTATGAGC  
AGGGGGAGAAAGAAAGGGAGAAGCAGACTTCCTGCTCAGCAGGGAGCCTG  
ATGTGGGACTCTATCCCAGGACCCCTGGGATCATAATCTGAGCCTAAGTCA  
GACGCTTAACTGACTGAGCCAGCCAGGTGCTCCTGAGAAAGCCTGTCTTT  
ATGGCCACATCCAAAGTGACACTATCATGCTAATGGTGAATTATCATAAC  
CTTGTTTATAGGTAAAAGAAAAGTTATAGAAGTAACAGCAAATAGCATAA  
TAATGGTGGTAACTAGAGGCAAAAGAAGAAAAAATTAACTTTCTGTAGCG  
TTTTCAAATCAGGAACTTTAGGAAAAGAAGAAGAAATGAAGTTATTGCCCA  
CCCCACCCCAACCCACCCCATCCCAAAATCTGCATTTTTTCATGGCTGTA  
CAAATATGTTTCTAAAAGGACCTCTAAAATGCATGGCCATGCTATTTCTG  
GGTGAAGTGGTCAAATGCCAGCTAGTTTCTGATATCTTTGTAGTATATT  
TTTCAAGCTTTTTTTTTGTTTTGTTTTTTTTGAAAGAATTTAGGTAGATTCT  
CTTGATTTTCCCTTTCTTGTTTTAACTGGTATTAACCTAATATTACTTT  
CCTGCAGGATGAGCTATTTATGATTGGGAAGATAAGATGCTGACACCTTA  
AGTGAATTGCAGACTAATTCAGAACAGCCATTGTTATGCTTATCATTATT  
GTTCTGTTAAATCATTTGTGGACTATTTTTTTTTTTTTTTTTTTTTAGGTT  
GAAGCTCCTGTTCTTCATGTAACATTTTAGAATTTGAAGGTTTTTCAGTC  
ATCTATCACCAAGGATACAAAGCAAACCTGGTTTTATTTTTTTTATTATTTT  
TATTTTTTTTTAATTTTTTATTTATGATAGTCACACAGAGAGAGAGAG  
AGAGAGAGAGAGGGGCAGAGACACAGGCAGAGGGAGAAGGGAGAAGCAGG  
CTCCATGCACCAGGAGCCCGACGTGGGATTGATCTCGGGTCTCCAGGAT  
CGCGCCCTGGGCCAAAGGCAGGCGCCAAACCGCTGCGCCACCCAGGGATC  
CCAGCAAACCTGGTTTTTAAATTCCAAATAACCAAACACCGTAACCTGGCT  
TTCTGGATTTCCTGGGAGAAGGAATGCATTTCTTATAAATACTCTACCTACT  
TATCTATGATCATCTATTAGTTATATATAACTATGATTGAGAACAGTATA

ATTCTATAATTGAACATATTCTCTGCTAAAAAATAGAAAAGTGGCAGAC  
TTTGGCAGCTTTTAGAATTCATTTTTTCATGCTTCATGTGTGTTTAAACCT  
AAGTAATGATTATTTCTCAACTTCTCCTATTCCAATAATATTTTCATTTGG  
AAAAGCCAATGTCATTAGCATGGCAGTGGTACTCTTCTCCCTGGAAGGAA  
TTAATGTCTCGTGTATTGGTATTTGTGGGGAGACCCCTCACCAAATCAT  
TATCAGTGACCTTCTGCATTTCCCTTATGCCCCAGACCACATCCTTGAGA  
GTTATGTCAAAAGCATTCACTCCGAAATATAAAAGTAATTCTTAAACAA  
AAATAAAATAACTCAAAGAAAGGGCAAAGATCTGAATGGCCACCTCAGT  
AAAGAAGTTATACACATGGAAAATATGCATATGAAAAGATCCTCCACATC  
ATATGTCAGTAGGGAAAGATAAATCAAACAACCTGTGAGGGATCCCTGGG  
TGGCTCAGCGTTTAGCACCACCTTCAGCCCAGGGCGTGATCCTGGAGAC  
CCGGGATCAAGTCCACATCAGGCTCCCTGCATGGAGCCTGCTTCTTCTT  
CTTCTGCTGCATCTCTGCCTTTCTCTCTCTCTGTGTATCATGAATA  
AATAAAATCTTAAAAAAAAAAAACTGTGAGATACACACACCTATTAGAA  
TGGCCAGAATCCAAACACTAACAACACTAAACACCTGTGAGGCTATAGA  
GCAGCAGGTGAGCCACTTTGGAAGATGGTCTTTTACAAAATTAAACATCT  
TCATAGCAAATAATCCAGCAATCATGTGGCTTGGTGTGTTATCCAAAGGAG  
TTGAAAACCTTACATCCACACAAAACTGCACACAGATGGTTTGTTTATAG  
CAGATTTATTCTTAATTGCCAAAACGTGGAAGCAACCACGATGTCCTTCA  
GGAGGTGAATGAATAAAATAAACTTTGATCTATCCGAACAATGGAATATTA  
TTTGGCATTAAAAACAACAGCAAAACAAAACAGAAGAGCTATGGAGCCA  
TTAAAAGACACAGAGGAATCTTAAGTCCACATTTCTCAGTAAAAGAAGAC  
AATCAGTCATTTGTATGGAATATGGAGGCTACATACTGTACGACTCCAAC  
TATGACATCCTGGAGGAGGCAAACTAGGGAGACAGTAAAAAGATCAGTG  
GTTACAGGGGAAGGCTGAGGATTTGGAGGGATGATGAGAATAAGCACAGAG  
GATTTTATAGGACAGTGAAGCTATTCTGTATGATGCTATAATGGTGGATAT  
GTGACATTTACATTTGCTAAAAAGTAAAACCCATAAAATGTACCATACCA  
AGAGTGAACCTTAATATAAACTATGGACTTCGACTGATAAAGATATAGGA  
ATATAGGTTCTATTCTGGGTAGTGGGGTGGGTGTAGATAGTAAAGGATG  
CTGTGGCACATTATGTAGGAATTCATGATACTTTTCATTTAATTCTGCTG  
TGAACCTAAAGCTGCACCAAAAAAAAAATAATAATAATAATCCTATTTAA  
AAAGAGGGGGAAATCACTTTCAAAATATGCTCATAGAAGGTAGCAGTACA  
GGAGAATGTTGGCTTCTCTGTCAATATAGCTCTTAAAAGAAAACGACCAG  
TTTCTCTAAATCCAAGTGCTTTAAACACATTTATCCTTCGGCATTGTCTT  
TGAGTCCATTAAAAATCTCTTTTATTTCTCAATCTGTGCCATATTGTGT  
TGAAAAAATAAAGGACTAGCTTTAACGATGAAGGAATCATTATAAATCAT  
TAATAATTCAAAACCTATTAAACAACAAAATACAATAGCGGCATTTCTCTT  
AAGGGAACCTAGGCAATGTGCTCTGTGCATTTTGGAGGCTTTATTCTGGCT  
ATCGTTTATCCATCTCTCTGGCACAGATGTGGTTATTTTCCGCCTTTTCC  
TCATTTGCATTCTAATAAAGAGTTAGCAGTGAAAAAGAGATTGTAGATTG  
GAACATTAGAGATTCAAAAGTATTTTAAATATTCCAGAAAGCAAACCTTG  
AATGTTCACTCTAGGTTTTGTGGTAAGACCTGTCCCATCTGTGGAACCTGG  
AATTTTCGCATTTTCTACTGCTGATATCTAGCCCAGCCATGTTGAAAATT  
AACAACTCTGGGTCAATTCAAGTGTTTCTTAAACTCCTCTGACCAAATG  
GCTGAAATTAATAATGTAGGAAACAACAGATGTTGGTGAGGATGCAGAGA  
AAGACGAACTCTCTCACACTGTTGGGTGGGAATGCAAGCTGATGCAACCA  
CTCTGGAAAGCAGAAATAGAGATTCCCTCAAAAAGTTCAACATAGAGCTACC  
CTGCGACCCAGCAATTGCATACTAGGTATTTATCCAAAGGATACAAACA  
TAGTGATTTGAGGGGGCAGATGCACCCCAATCTTTACAGCAGCAATATCC  
ACAGTAGTCAAACCTACAGAAAGAGTCCAGATGTCCATCAACAGATGAATG  
GATTAGAAGATGTGGTATATACTTCTTAGGGAATATTATTAGCCATCAA  
AAAGAATGAAATCTTGCCGTTGGCAGTCATCAAACCTTGCCATTTGCAAT  
GATGTGGACAGAAGCTAGAGGGTATTATGTTAAGTGAAATAAGTCAGTCAG  
AGAAAGACAAATATGATATGATCTCACTCATATATAGAATTTAAGAAACA  
AAACAGATGAACATAGGAGAAGGGAAGGAAAGAAAAACAAAATAAGATGA  
AAATGGAAAGGGAGAGGGAGGCAAACCATAAGAGACTCTTTACTATAAGA  
AACAAACTGAGGGTTGCTGGAGGGGAAGTAGGTGGAGTGATGGGGTAACT  
GGGTGATGAGCATGAAAGAGGGCACTCAAAGTAATGTGCACTGGGTGTTG

TATGAACTGATGAATTACTAAATTCTACCCCTGAACTGATAATACACT  
AGATGTTAACTAACTTAAATTTAAATAAAGAATTAAAAAATAAAACCCC  
CTCTGACCAAAATTTACACAGCTAGCTAGAAGAATCAGACCAGTTATTTG  
GGGGGTATGGTAGTGGTTATTCTCCTAATGGTGGCAAAGATATTTAAGAA  
ACTAGAATCACAGAATGTAAATTCAGCATCATGTTAATACTGAAGCATC  
ATTACATTTTTCTCAAATTATGAATGGTTTTAATATTTGGGATTAGAGGT  
TTATAGTGAAGGGCTAGTAGGGAAGTGAAGGTCAGGGAAACCAGCACCCA  
AGTGGGAGCTTCAGCACTAGAACGGATTCTCAGGATCTTGCTTACAGTGT  
CTCCAAATCTCAAGAATCCCTGAGATTTAAAGAAGAATAAGAACCCCTGG  
GAATCTCCTAATGATTTATATCAGTCTGAAGTTCCTATGTGGATAATTAT  
CAAAAGTTCAGTGAACACACATTCTGCTTCAGACATCCTGTCAAGGCCAT  
TCATCCTTCTGTCCAGACTTCCCAGTTGGACTCCAATACCTGCCTTTCTT  
ACTTGTTAACCCTGAATCAGATACATGAGCACATTCTGGAACTGTAGCT  
CTCAGTTCCTTCTCTGCACTTAGAGGAAAACCTGAGAAGGAGCTGGCGGT  
GATGTCCAGTGAAAACAGTCAAGTGCATGTACCATGATCCTGCTTCTTTC  
ACTTTAAGTATCCAATTCAATATATCTACATACGTATTTTTTTCTACATA  
CATATTTTTTAAAAGCAATTACAACCCTGACGTATATGCCTGAATGGCTTA  
TTTTACTATTTGGAATTTAAATTCAGAATGAAAGAAAAAGACGTTTGG  
GTATACAGAGCTTCTTGGATCTATAGATTATTGGCTTTCATTAAATTTGC  
GACGTTTTTGGCCATTATTTCTTCCACTAGTTCCCCCTTTCACTCTCTT  
CTCTCCTTGTGGCACACTCATTACACACACATGTATGCTTGGTAGTGTTT  
CAGAGATCTCTGAAGTTTTGTAAATTTTCCCATTGATCTATCTTCAACTT  
CATCGATTCTTTTTTATTTTCTTTTTCTGCCCATATGACTCTTCTGTTG  
TAACTGTCAAGTGAACTTTTCATTTTAATTATTTTACTTTCCAAATCCCA  
AATCCTCATTTTTTTTTCTACAACGCCATCTCCTTAATACGAGTTAATA  
CAAGTTTCTGTTCAATTGAATCATGTATCATACTTTCCTTTTACTCTTT  
CAGTATGGCATTCTTTAGCTATTTGGATTCCCTTGAATCTAAAACCAGGG  
CTGGGGGGACATACACACACAGTTTCTATTGATTACCCCTCTTTTTTCTG  
AGTTTGAGGCACATTTTCTATGCTTCACATATTTTCTGTGGAATATT  
GCATATTTTCAACAATATTGGCTTTTTTCTCCTGAGAATTGTTTTGGCT  
TTTGTTTTGTGTTGTTGTTATTGTTGTTGCTTTGTTTTGTTTTCTTCA  
TTAAATCTGTGATGTATGTCTCCCTCTAAATGTGTGGCTTTGGATGTTTC  
TGCTGAGTTGTTTTGTTATTTTATTTTATTTTCAAGTTTGCTTTCCTA  
TGTGTATTTTCTAGGAATAGCTTACTGTTTCAAGTACAGGATTAAAGATTAT  
TTTCAAACACCTCAAACCTATGAGTCTTCTACTCTCTGCTGACAATCTG  
TATGCAAGTTAAGGAACAGATTCAAACAGGCTGCTTTAGATTTATCCTTT  
TTTCTTTCTTTTTTTTCTTTTTCTTTCTTTCTTTTTTTTTTTTTTTACTA  
TCCATAGAACTTTCTTGTGTCTCCTTTGAGCGTGTGCCCTGGCACCAAAG  
GCCAGAGATGTACAAGCAGCTTAAATCCGTTGTGATCTCTGCTGTATACC  
CACATTGCTTCTGGCCAATCCCAGATGTGTAGAAAGCTTATCAAACCCCC  
TATGTGTGCTCATTTACTGGAACCTTGTTTAATCACTAGCTATGCAAAT  
TTAAGCAAATAGAGCTCCTAGCCTCTCTTTTCACTTGCATCAGGATTGCC  
CTTGTATTAGTTAGGGTCTCCAGAGAAACAGAACAAATCAAATACACCT  
ACAAACACACATACACACATATATGAAAATACATGTGTATTTTTTGCAT  
ATTTACATTTAATCATGTGTTTATGGAACTAGGAAGTCCATAATCAGGT  
ATCTGCAAGGCATCTGAGACCCAGGAAAGCCAGTGGTTAGTTCTAATCTG  
AGTCCAAAGCCTTGAGAACCAGGAGTGTCCATGATGTAACCTTCTAGTCTG  
ATAGCAAAAAGCCAACCTCCAGCTCAAGCAGTAAGTCAGAGAAAGAGAAT  
TCTCTCTTCTTCTGTCTTCTCCTCCATTTTATTTAGGCTTTCAACAGGTTGG  
CAGATTCCCTACTTTGGGGAGGACAATCTGCTGTACTTACTCTATGGGTCC  
AGATACTAATATCTGCCTGAAACATTCTCACAGACACACCAGAAATAAT  
ATTTAACCAAATATCTGGACATCCTGTGACCCACTCAAGCTGACCCATGA  
AATTAATCATCACAACTTTAATAATAGTGTTCTAAATTCTGTGTAATC  
TTACTAGCAGTGACAGTGACAGCCTGCCTCTCCCTGGCTGAATTATCATG  
GGCAGAGCCAGTGAGGTCATGGGATCCATCCTAGGCAAGAACCCATAGG  
CTCATGCTGTTCTTACCCAAAGTTTCATAGTATTCATGAATAGATGCTGT  
TTACTGATGTTTCGATGTTGGGTGATTTCTAGATTTTGTAGCAATCTGAA  
ATGATTGTGTTTGACAGTTTTGCCCAGTTTTATGGTTCCTTTCGGTTAGA

AGATAGTTGGCTTCTCTAATCCCATTATGCTGCGGAAGGAGATTTTATTAACTATAAATTTATCTAGAGTATATAACTCCTTTTCAACATATCCCTTTACCA TTCCAAGCCTGTGCAAAAAGAGACACACACAGAGGATGAGAGAGAGACAG AGAGAAAAAGAGAGAGAGAGAGATCAGTGATCCAGAAAATGTATCACTTC ACAACACTTCAGCAAAAAGATCTTGCCCTTTCAACTCAAATGAACCTTGC TTTGAATCTTGGAATTATAAATTCTACTATATGTACTCTGGAAAAAAC ACTCAAACCTCTTTGAGCCTCCTCTGTAAAACAGGAATCTTAGCTGGGTTT TTGTAAAGACAAAATGCCTTGGCTATAATGTGTACTTAATGAATGCTCGT TTTCTTTATTATACCCCTTCTCTTTGCTTTCCATAAGCATATGCTATGTG TAACTGCCTGATTTTATGTTTGGTGTTTAAAACTGCATTAGATCGTGTA TTTGGTTATTGATGTTTAAAGAGTACATAGCTATAATTATTGGTAATTCT AGAGACACAATGGAGAAATGTTTTCTGAAGCAACCAACACCCCTCTGGTT TGATGCCCCAAGAAATGCAGCCCTATTCTTGTGTTTTTACAAGCCTTATGTT GATTTATGTTTGCAAATGTACTTTTGGTAGTTTTCTTAGGCTATATTCCC AGTGTCTTGGCTTTAGATAACCATTGTATATATATTTTTTGCAGTATTTTC TAAGTGTTACAAGGAAGAAGGAATGAAGGGGATAAAATGCATGTTAGTTT TTGTGGGATAAAATCCAAACCAACTGATTCTAGTGGAACCTTCCCTTTTTT TCCCCCAATCTTTCTCTTGGTCAGTTATAATATCATTACATATAGCATT AATATCATTACAGCACTCTCAGTGTTTCTTCTCTGAACAAATTCACTCAA CCACAACCTAGTTACTAGACTAGTATTTCAATTCTAAGTACTGGTCATGAC TAGGAAGTGAAGCAAAGAAAAAACCTTTGTAATAACAAAGGTTATAGTCT CATTTAGAGAATATATCCATTTTCTGCATCTTGCTTATATACATTTTCAT TTTATGTGTATGCCTAAATACATTGTGAGTTTGACAAACCTTATACCGTAA TTTTGAAAAATGAATCTGCTTTTCTCCATGACTATTAACCTCTTAATAGTA AGAGACATGATTTATTTTCCCTTGAATTATTACCTCTCTCATAGGAGAG AGTATCAGACATCAAAGATCAACCTGGCTTTGTAGAAACAACACTGGAAT TGAAGTGGAAATGGAACACAAAGTTTTCTCTGTCTGCCCCTCATTGTATG ATCTTGGTTAAGTAAATCAACTTCTCTGAATTTTGCTTCCCTTCTATTCA GTAATGAGATTATTTAATCCCGAAGTTTCCCTATTGCTGATAAAATGCTAT GACTCTGCAATCCTCTTACATTGGTCTGAATTTTATCTATGATGTCTTTA AATAATTTATAAAATAAATGCTGCTATTTGCTGTCTGCCTGATTATACCT AAGGTTCTCTGGTATATTTGTTCCATTAGGTGTTGGATGTTATTTTCAGA GATACGATTTAAAGTTTCCAGGCAGCTAGACTAATCTCTTTTGAGATTGG GACCTCATTTGGTTATGGCCTCACATTAATAATCAGTTTATTGTACCATG AACTTCCCCACTAATTCATCTTATATTTGTGAATCTATATTATATCTATA TTTATATCAATTTCTAGATCAGGACATTTAAGAATATGATTTGAGAACAT TCCAGAATAGGATCTCTTTAGTCCTGTTCTTAAGCCCTAGAGTACCTTAA GATTTATTTCTTTATTTAGAACAATCTCTTCTTTCAGTGCCTAAATTTAT TATATCCCATCTACCTAAAAGCTTTGAAAAATATCTTCAAGTGTTCAATTT ACATCTGGTGGTGAGAAGAGGCATGGGGAACATAAACTACTGGCCAGACC CTGTTTCAGAATTCTTCTATTTGCTTAGCTCCATTGTGACTCCAGCAAAGA GTTAAGCTAAAAAAAAAAAAAAAAAAAAAAAAAAAAAAAAATCCTTAAC TCATGTACCTTCAGTGTTCTGTGGGAACAATGGAATAGAAAAGCAGCACA TTATAGGCCTCACCCAAAGAAGGGGCTCAGGTTTGTACATTTCAACCTCA TCTAGTCTCCATCTTATTAATGGTTTAATTTTGGCAGCTACACACCCAAG AGTGAAAGACATAAAATCCACAATTTTACCACAGCTGTTTCTACTTCCCT CTACAAAATTATTTAAACACCTTGTGACCTAAGGGGAAGGATAAATGAA TGACTTTCCAAATGAATTATCTCCTGTCTGCTGTGTCAATTTCAGAAGTAC TTGCTAATGGACAGAATAATCTTTTACAATTATCTTTTCATGATCTGGAGA TTTAAAACTGTACTTAATCCCTGTTCCATATGTTTTCATCTTAGAATG CATTTCATAGAGAAGCAGAATTGCTATAAGAAATATGGAATCATGCTTCA TTTGAGAAAGCAGAGAGGAGTTTACTAAATACCTCTAAAATCCTTCTGAAA TCTTGTCTTCAGAGGGGAGCTTCAGGATCACATCTTTAGGATTTGGAAAC GTAAATTGTGCTGCCAAAGAGTTTTCTTTTTTTTATAAGTAGTGAGCTATA CAAACATGTTTTGAAATACCATTTTGGAGATACAAAGTCCAGATTTCATAT TAAAATTCAAAGGAAATTGAATTACATAGTGGTAATAACACCCCTACCTG GTCATCTGTTAGTAATGCCATGGTAAATATAATTTTCAGTGATAAATCTCT GCCAGTACTACCATGTCCCTGTTCCACAACCACAGAGCATATACACATAC

ACAAAAAGGAGTAAGACAAGGAGGGGGAAAAAGCCACTAAAACACCTCA  
CATAATAAGTCAACACTTATAGTATTAAAATATCAACCCTTTGGACAAAA  
GAAAATAGGAATGATAACTGATCCTAAGTCAGGTACAATCTTGAATATTT  
CTTTCATCGATAGAGATCTTGCAGCTGAAGTTATGTGAGAAAGGTTAATT  
AGATTAAAATTAACCTCTACCACTGACTATGGGGATCTTAATCATGCAAAT  
GCTTGAATCTTACTATTTTTTTTTTTCAGCTTGATACCCAGAGGTGATGTTT  
GCTTAGCTCAAAATGACTTTTTTCTCTTGCCACAACACCCAATGGAATG  
TGTCTCCGGCAGCCAAAATTGAACATAGTTGATTGAACAAGGGTAAGCAC  
TTGAAAGGAATGGGACCAATAAGATCCTCTCCCCTAAAAGCTGGACAGAA  
TGGCTAAGTGGTTCTCATCAGCTTGAGAGAGAGAAAAATTTCCGAGGTTAG  
CACAATCATTTACCTGAATTCACTATTGGCAAATAATGCCATTCCATGA  
AAAGGTATGACGGATATGTCCAGAGAGATTACAAACATCTCAACCTGGGC  
TCCTTAAAGTCTCCATTTCTTCATTCCAGTTGTTGCCTACTTTCTAACCC  
TGATTTCTAGAGACATTGCTCACTATTAATAAGCTTCTTTTCTGATACTT  
ATATGAACAAAAATTGATTTGAATGGTTATACCCCCAAAATTCCTGTCTCA  
TACAGGTAACATAGAAATATAATAACTACTTTAACCTAACTATACCTAAT  
TTTAGAAATGAAAATGAAATGTAACAATGTGATGACAATTCTGAGAAATA  
GAAATTCTAAAGAACATACTACAGTTTTTATTGACACATTGCAGATAGTG  
ATTATTGAATAATTCTTGAATCTTTTTTACTCATTTAAGGGTAAAATTTT  
TTAACAAATATATGTGAGTAGGGTATCTTGAAAAAGCCACAGTTTAATTGG  
CATACAAATCACAACTGCTTTGGGGAAATATTTTAATATTAATCTGGTT  
TGTGTCTACTTAGTGTGAAAAGTTCCGAGTTTTTTCCCTCTCAACCAATA  
TTCTCTGAAATTTCTTGCTCTCAGAATGTGTAGAAAGACAACATATTATC  
CTTCTCCAATCGGAATCATCACACGTTGGTTAGGCTTTTATTTCTCCT  
ATAAAATGTCTTTTATTTAATAGGATCTATTTCCCAGGTGTTAAATTTTC  
CAGAAGAATAATTTCCCTTGTTTTAACTCCTGGCCTGTATGGCATTGGTC  
TCTCTTGACTAGTTACTTGCATATAAAAAGAGTTAATTTAAATTCAGTC  
CCGCAACCTATTTTCCACTGTTTGTAGATGACATTACGTAGTGGAACCTA  
ATATAGGTCCTTGTTAAAATGTTTTCTATTTCAAAAGTGATTTATTTTG  
AATTCAATTTCCAGTTATTAATATAAACATCTAATTCAAAAATGTAATG  
TCTTAATAACAAAGTCCATTGAATTGGGACAAATTTCTGTCTGTTTCAGG  
AGACTGGGGTAGAAATCTTTATATGGGTAGAGTTCTATTGTCATTTTAAC  
ATTAATGCATGTGGTATCATAAAATCCATATTGGTATAAACATTAGTCAC  
TAGGCCACAGACTTCCTTTTTCATTTTTATATATGTACCAAATGATGCAA  
AACATGTTACACTAGGGGGTAGCTTTTTTATACTTCTGGGTCACCACTTGT  
TGGAAGAGAGAACAATGGGCTAGATCTAGAGAGAAAGAGATCTTCTTTT  
TTTCTTTCTTTCTTTCTTTCTTTCTTTCTTTCTTTCTTTCTTTCTTT  
CTTTCCTCTTCCTTTCTTTTAATACTGGCTACAAGTAGGCAAGTTTAACC  
AAGAGGAAATTTAAAATATCATCTTGTTAACATTTTCCACATCTGCAAG  
GCCTATCCTTAGAAGATTTAATTTTAAAAAGATTTCTCTTATCATGAAC  
AGGTTATGACATAAGCCAAGTACTAAATTCTAGTTTAATATCTTCTTAGA  
GCAGTTTTCTTAGAATCCTGTGAAGTTCTGTGTTGCTTATTCTCCCCTT  
CTTGCCTGCCACTTTCCAAAACCTCCTGACTCCCTTTCTCCATGATTTGT  
AATCTCTGTGATCCTTCAAGGCTCACATAAGACCTCAACAAAACCTTTCT  
CAAAGTTCAAGGCAACAGCTACTTCTTCCATACTTGATTTATCATAATA  
GGATTCATGCTTGGCATTTAGTGGTACAAGGAGAAATAAACATTTATTAA  
TGAATGGTTCCTCTTTGGTAGATATTTTTTAGTCTATTATAATTTCTAATT  
CATCTCTCATTTATCTAATTTGGTAAACTAATAGAATGATTCCTCAAAGT  
ACAGATATTACAATAACAATATCTTCTGTCTTTGCCATCACCCAAGTAA  
GCTTTGAAAAACACTTATGTTTGTCTTACAGAGCCAGTCTTCTTTTGATT  
AGGTCTTAAATAGCTCCTAATTTCTACTGAACATACATGAAATCTGTAGGA  
TTAATTTTCTTTTTCTCTCCTTTAATTAGATCCTTCTTTTCTTCATAATC  
CATTATCATTTTCTTGAATATAAAATAAAAAATAAATAAATGGACAATTAAG  
CTAAAAAATAAAGCATGACATCATATTGGGCAAACAAGCTATCAACATAG  
GTTAGTTAAATAATAATTGAAGATATATGTATACAGTGCCACAAGACAAG  
GTATGTTCCATTGGTGAGGACAATGGCTCATGTAGTTTCACAGGAGAGAG  
AGGTTACATTCATCATGAATGAACTGAGACAACCTGCATAGAAGAGGGGAC  
TTTTTCTCTGGGCCTAGAAGAATTGTTTGAAATGGGAGCAAATGCATTTT

AGGCAAGAGAGGTAAGTATGAAGAAAGGAAAGGAAGTAAGATAATGCAGG  
GATTGTTGGATTGACTAGCTAGCAGCAAAGAGCAGACAAGATTAAAAAGA  
AAGATGAAAAACAAAACAAAAGACTAAAAGGGAAGATGGATTGTTG  
GACAGTAGAAGGTCTGAATAGCATGCTAAGAATTTAAGGGTTTACCCTTG  
AGGAAATGAAAGAACTGAGTTTTTTTTTTTTTTTTTTTTTTTTTTAAGA  
AACTGAGTTTTAAACCAGAATTAAAGTGTACATTCAAAGACTTAGCT  
TGTTGCAGATTTAGTTAATTTGATAAGGAAGAGACTGAAGGAAAGGAGAT  
GGGACTGTTGATGGAGCACTGAAGGGAAGTATGAGAGCCTAAAGTGAAT  
ATGTGGCATCACAAAAGAAAAACAAAAATAACTGCTGCATGACATGGA  
AAGAGGAACCCACTGGGCTTGGAGACTCAAGGAGTTTTGTAAGGTTAAAG  
CATCAAAAGTCCCAAAGTACTATAAGAAAAACAGAAAAAGAGAAAAAG  
AAAAAGAAAGAAAGAAAGAAAGAAAGAAAGAAAGAAAGAAAGAAAGAAAG  
GAAAGAAAGAAAGAAAGAAAGAAAGAAAGAAAGAAAGAAAGAAAGAAAG  
CATGTCAAAAAGAAAGAGGGGAATATTCATCTTTGGAATTACTTAGTAATGA  
AAAGTTTATTCCCTCCAGTGGAGAGTTCACAGTTACACTGGTATGCTCC  
TTTCAACAACTAGGGTCTTCCAAGTACTTGAATACCTTGATTTTAGAAG  
TATTCTTTTTCAATTGTGTGAATCTACATAGCTCCTGAGAGTAAGACGCT  
ACAATGTATTGAATGCACAGCACACCAAATCTCCCAGAAATATCCTTTATG  
GGGACAACTCTCTAAAAAACTATTGAAAATGTGTTGAATTTACATACTCA  
TAACCTGACACAAATTTCTCCTTGTTGCCCAACCTCTGACCTTCCCCATA  
CACACACATACGCACACACACAAACACACACACTCTCTCTCTCACACA  
CATTCTTAACTGGCTTTTTTAGGCTGCAACAGAAGTCCCTTTGTAAGTCTG  
CTCAAGGAAGATGCGATTAAAGATAATTTGAAATAACCATTTTTCCCCACC  
TGGGCTTATTAAAGCTAGATGTTTATCTAGAGGCATTCTGCACCTAACTA  
TAAGCTGGGAGACCCAGTGTCAACAGTAGTAGCAAAAAATGAAAATTAC  
TATAAAAATTCATATTTTAAAGAGAAAGGTATCTTTTAAACAAAGTTTATA  
AATTGAGATATGCAAAATGAGTTTGTAACTCTGTGGAAAACTGTCTCAGG  
ATATTTGATATAAATGCATTATATGTAGGGGTACATACTTTTAAAGAGCAA  
AACCAATGCTCTTAATTGCTCATAAAAGAGTGAATAATTAATAGATCTAT  
TAAGGCATACCTTCTATACTTTATGAATTTAATACTGAAAAGTAGTATAA  
ATAAGAAAAAGCATTGAGCAAGGAAAACAGGCTATTGAACTGAATTCTGA  
AGTGTGTGTGTGTGTGTGTGTGTGTGTGTGTGTGTGGCTGGAGGTAGA  
AGTTTGAAATGCTCTTAAATATTTTTTATAAATAGAATACTATCAGAAT  
ACTATTTTAAAGAAAAATAAAGTTAGGAAGTTTAACTCATTCACAAATGG  
CAGGTTAGGAAGATGATGGAGACTTAAATTGGGAAGTCAATTTAAAAAGCT  
GCTCTGGTAAATCCATGCTGTGGATACCTCTCCTCTCCATGTATGTAGAG  
ATGGCCACTATTGCAGGAACACAGGTTATAAGTAAATTCTAAATAAATTG  
CAAAGAGCTGAGGGCCAAGACGTGTGGCCATCCAAGTAGAAGGGTAAAGT  
ACTTTTCTCAGCCACGCTGCTCATTCACTTGGTAAATCACAAGGAACTG  
TCCTCTGTGGGATCTCAGAATACGTTAGTTATCAAGCACAAGGGTGAGAA  
CCGTCTTGACATACTTCTCTCAGGGTTAAATAATCTGGATTCTGAGAGT  
CCATGGAGAAAAGAGAGATGAATTAGAGGAATTAACCTGGGAACTTATCTT  
AGTCACATGTGTGCATTTACGCGAGTGCACAATCTAATTGTTTTTTTTT  
TTTTATAGTGAAAGGTTATCTCTAATTCGTACTGATAGGAAGCCACGAGC  
TGTGTTCTGAACAATTTACTAAATATAAACGGCTGATACATGCTTTCGTG  
ATCCAAATGAGGGCTTTTCTACTTCTCACATTTTGATGGCTTGCTCACT  
TGTTTGTTTTCTCAAATTTCTTGCAGTGCAGATCTTGATCTGTTACCTT  
TGTACAAAGCGAGCCAATTGGGGAAATCCGCTCTCACTGCTCCTCTACTG  
AGGAAGAACAACAGTGGATTAATGATTTTCGATGTTTCAGGCAAACTAGCT  
AATTCACATACAAATTAATAATTTAATGTAACCTATGATAGTTTTATTGCA  
TGTTATTGCTTCAAAAAAAGAAAAAGAAAGAAATCTCCACCCCTTG  
GAAGTTTTTTCCTAATTAATTTGTAATCTGTCCATTGCATCCTGCCCTAAT  
TAAAAAAATTAATTAATTTAAAAAATAATAAATGCCATGATTCCTGCT  
TTACCTATCATCCCACAGTACATATTGACGTCGTTTTTATGGGCGTAATG  
TTAGTGGGCAAAATGTCAATGCATAACATTAATATGTAGCAATATTAAT  
GCCAAACAATGATTTAAGCCGCAGGAGAATCTTATAGGTCAACTTCTAGT  
TGATTGCTATCTTAATAGGAGAGTAAAAAATGTTATACATCCCAATACTC  
CCAAAAGTGATTCTCAAAGGGTGATTTTGCCCTCAGGGTACGTTTGGC

AAGGTCTGGAGAGTTTTGATTAGCCTGGCTGGAGGGGGTTTACTACTGAC  
ATCTAGTGGGTAGAGGTCAGGCCTGCTGGTAAACATGCTGAATTACAAAA  
AACGGGCCACCCCTACCCCAAAAAACAATTCTCTAATCAAAATGTAAATA  
GGATTCCCTATTTTCCCTTTTCTGCACTATAAACTAACAACTTTTTTTC  
ACTGATGAAGGGTTTGCTTCCTATTTTAGGGAATTGTGTATATGTGTGTG  
TGTGTGTGTGTGTGTGTGTGTGTGTGTGTGTGTGTGTGTGTGTGTGTGT  
CTGAAGATAAAATAAATTCTCTCAACTTAAACAAGCCAGAAGCAAAACAT  
GCCTTCCTACCATTGCCTAATATAATAATTAAAATTACTAAATCAAATTT  
CAAAATCCAACCTTACGGAGAAGAAACAAAGAGCATATGTTCTCTGTAGAG  
TATTAGAATAATGCATTGGGTCACCATTAATTATTAAATGAAGCTACAAG  
TATGACAATAGCAAAAATATAAAAATGTAATATGTAAAAAATGTTAAAA  
AGTAACAAAAAAGTAAAAATGTACATTTTTGTCCCTTATTCATAAAAT  
GGCAATTTTTCTGCAATGGCTAATCTCTGAAGTTGGGAAGACAAAAAAGGA  
ATTTGATGTTCCCTCTTTACATTTATGATTTAATTTCCAGAGTGACTTCTT  
ATTGTAACGTAAATTTCTTTCTTGACTAGAGGTCCATCTGGGACTATTTAT  
AAAAATAAAGTGTATTTTCAAGTCCTTTGCAAAGCTAATCAACAATGACA  
GAAAAATAGCCTAGAATTGCCTTGGGCTAATTGTGGGTAGAACTGTGCAA  
AGAGACATAAGGGAACCATTTGGAATGATGGAGATATTCTATATCTTGAT  
AGGGGTGGTGATTGCATAAGTGTGTGATTTGTCAAACTCATTGGATAC  
ACTTAAATGGGTGCACTTGAGTATAAGTAAATTGTATAATAATAAGCA  
GGGTGGGTTTTTTTTTTAATTGCCTGCTTTGGATAATAAATCATATGGCT  
ATTTTACTCCTAAATCTAGTCAAAGTAGCATCTCACACTCAGATTTGGTA  
ATCAAGTAACACATTATTTTATGTGTGCAATGGCTACGAACAACTAGAAC  
ATCCTCTGTGTGCTCTGCCCATACCAAATCATTTCCCTTCTCTTTGTTTTA  
AAGATGAGGAAACAGAACCCCAAAGATTTTGATAGTAAAAATATCCTTTAC  
TTTGAAAAAAGAAATATCTAAGGCATTACACTATTATAATTA  
CATTACTCATAGGTAAATTATGAACTCTGGAACTAGCTACCTTGCTTTT  
TTTTTTTTTAAAGATTTGTTTATTTATATTAGAGAGAAAGTGGAGGGAG  
GAGCAGAGGGAGAGGGAGAGATTGAATCTCAAGCAGACTCCCACTGAAT  
GTGGAGCCAAATGCTGAGCTCAGTCTCATGACCCCAAGACCATGACCTGA  
TTTGAAATCAAGAGTTGGAGGCTCAACCAACTGAGCCACCCAGGTGCCCC  
TGGAAGCTAGCTACCTTTCTGAAGGACACACAGTTATATAGTGAATATGC  
CAAGAACACAATGTATACTTTCCTTAGCTTTTCACCATGATGTTTGGGCT  
GATCCTGTAATACATTAGATCTAACCTGGATGGAAAGAGAACTGTATGAA  
TAATTAAGTTGGGTCATATATACTCCAGATCTAACCCGGCATAGTTGGGA  
TTTCTGACATAGGGTCACTATAGATGCTATTTTCTCTGTCATTTTTTGACA  
TAATGTATTGCATTCTATAACCTAAAAGAGCTCATGACTATTTGTTTTTA  
CATTGAGATGGGACAGACATCCTTTCCTTTTAAACACAGGTACAAATCAAG  
ATACACCAAGTAAAGACACCTAAAATTGGTTTATCTTAACTTAGCTTGA  
TGATGGAAAAGTTGATGAGACAGTGTGTGTCAGTGAGGTTCCCTAATAGGAAA  
CAAATGGAATAATCAAACAAGGAAAACCTGAGAACATCTGGTTGACAAAG  
GACCCATGTGGGGGTCTGGTAAGGAAAGCACAAAGATAAACGGCATGAGA  
GGGCAGCAAAATGATTATATCACTCCTAGGATCAGCAGATAAAATATAAG  
GTGCTCCATTAAATTTATATTTCAAGTAAATAACAAATAAATGTTATAAA  
TGTTTTAGTATAAATAGGCCATGTTCTCTTGCTTTTTTTTTTTTTTCCCC  
TAAATCTTGTGACTCTAAGTCTACTCCTCTCTACCAAATAAAACACAGAA  
GAACAGAGCCAGCTTCTGGGCAGACCAGAAGACAGGGATTGGACAAAGC  
AGATAAGATGTCACAAGTATGGAAGGAGCCTCGGTGTCCAACGAAAGATG  
AATGGATAAAGAAGATGTGGTTTATGTATACAATGGAATATTACTCAGCT  
ATTAGAAATGACAAATACCCACCATTTGCTTCAACGTGGATGGAAGTGA  
GGGTATTATGCTGAGTGAAGTAAGTCAGTCGGAGAAGGACAAACATTATA  
TGTTCTCATTCATTTGGGGAATATAAATAATAGTGAAAGGGAAAATAAGG  
GAAGGGAGAAGAAATGTGTGGGAAATATCAGAAAGGGAGACAGAACATAA  
AGACTGCTAACTCTGGGAAACGAACAGGGGTGGTAGAAGGGGAGGAGGG  
CGGGAGCTGGGAGTGAATGGGTGACGGGCACTGGGTGTTATTCTGTATGT  
TAGTAAATTGAACACCAATAAAAAAAAAAAAAAAAAAAGATGTCACA  
AGTAGAGGAGAGAGAGAGTGAGGGACCCCCACAGTGAGGGAGCCTGTGGA  
TGAGGCATCTGGCCTCACTTTTCTCCCACCGCCTGACTTCGACACAACT

TCCCAGTGTCTGAACCCCCAAAAGACCAGCTTCCTAAGACAGAGCACAGGA  
AAAAAGGAAGGGCAGAGTGAATCTGGAGGAACAAATAGAACTATCTAGT  
CCAGAGAGGATTACATTCCCTAGCATAGCCAAGGCAGTGGCCACACTTTGG  
ACAAAGGAATTTAATACCTGAAGTGACACCTGATTATAAGTGAACCTAA  
AATTCATTTCAAAAATAAAATCAATAGGAATATATAAACTGATGTACATA  
GTATATTTTTTATTCAAAATATTTATCCTGTGTAACACAGTTCTAAACAGG  
GAACATAAATTGTACCAAAAAAATACATGAAGTGACTCAATGGAATACTC  
AAGAAAACCAGGTTGCCACTTCTTTCAAAGAGGAAAAATAAGTCAAAATG  
GAAACCAGATTACAGCATCCACATAAGAAAAAAATATGATAGTCCGAG  
CCTATGGCATTCTCTTACAAAAGCAGGTAAATGAAGTCCAACTTCTA  
TAGAGTAAATCCAATATTCTTTATGGATAGATTGTTTTAAGATTTAAAG  
ACTTTTAAAAACCATTCCAGATATGTCACTCTACAATTATATTGCTTATG  
GTAGCCATTGCTTATGATGACACATAAATATTTTCTGACCAAAGCATTTT  
GTAAAAATTTATCTGCACTCATGATTTTCAGATACCTTAAAAATGTTTCATGA  
TAAGGGAACCTTAAATAGTAACTTACACAGTACGATCACAAATCATGAT  
AAAAATAACATGCAAAAGCATAGACACAAAATACATGTGCATACATATCT  
ATCCGGAAATACATGCACAAAAACAATGACATTACTTGTAAATTCTGGATA  
TAGGAACTACGGGTGACATTTTATCATATTTTTACTTTACTTTCTAAATG  
TACCATTCTAAATGATTTTTTATAATCAGCCAAAAGAAAAATAAGTAACAT  
TTTAATATTCTTTTGTGAGGGTTTTATGTTCTAGAATAATCATTTTAATT  
GTCCTTTTACATTACTTGTGATTCTGGTGAAAAATGATTCAAAAGAAGA  
ACATACTTACTCTAGGATAACACATTGGAAATACCCCAGAGAAGAAGACT  
GTAACTTTGTGTGTTCTTTTAGTTTTCATAGTAAAATGGAAATTGTTTGT  
AGTTGTTGCCAAGAATAAGGCTTTGTAACTTTGAGTTTGGCACACACCAT  
ATACTACATATCACTATCCAAATGTTGCTGGAAAATCTGAAGACTTTTTT  
AGACACTTTTACAAGAGTGAGCGAAGTATTATCTTATCACAGTTAACAAT  
TATATGTTTCATTCTCTTGAATGAGTACAGGGGAAAACATCAAGGGACATT  
TCTGGCCTGGCATCCTGAGTCTCCATATTTGGCATTGGAATGACTATCAC  
TCCATAATTGGGCTAGTGTCCAGGGAAAGTAGAAATGGCTCACGGTAGGG  
GACATGCACTTGGCAGTGTGTTGGGCCATTTCTCAACATTTTCAGTAACTGG  
AATGCCTCATTTCTCTGTGTCGACAGTCCTGAGTAACATAGTAGTACCCA  
GGAGATCATTTAACTCTAATTTTTTTTTTAAATAGGTAGCTTTTCCAGG  
CAAACATAGCATTTTGCATCTTAAGCCCTGTCATCACCCATAGGAAAAAA  
ATATATATGATGTATTTCTTTTCATGCATCTAAGTTCAAATTTTTTGAGGT  
CATTCTTTTTTTTTCCAAATAATGGCTGGATACAGTCCTTTTTTTTTTTTT  
TTCTCTCCTTTCTAAGTTTCAACAGCTTACCCTTAAAAGACATAGATTAA  
AGAAATGCTAAGACTTGCATTTTTTTCTAAAACAAAGATTAGTGCTCACT  
GTATGAAGCCAATATCCCTCTATAGGAAAAAATAATATTAATAATTAGAG  
GATTTCTAAATTGCTGAATAAGGATGTGGCAAGTGTGTTATTTTTTATTT  
TTAAGTGCACTCTGAAGTCTCGGGGTGTGGCTTGCAGCAAATACAAAACA  
GGACATTGTCAAGTTAACAGAGAAGAGAATGTGAGGCCCAAATTGCTTAT  
TTCAGTTTGAGCTTCTGCTGCAGGTGGATAAACAGGGTCCACTGGAAGGG  
CCCAGTATCATTTACTCACTGGGTGATAAGAGAATAATGTATGGTCCCTA  
CCACTCCATGTTAATTACAAAAGAAGAATAGTGTTCTTTTAGCTCCGTG  
TCACCAAACATATGTGAGACAGTCAGGAATATTTAGTGTTTAGGGGAGAGA  
ACTGAATCACAGTACGAACAATTTGGTCAAATTATGTTCTTGAGGTCTTT  
CATTTGTCCTCCCCCAAACATCCATACTTGTTGTGCGGCATATTCAGCA  
ATTAATAATTAAATTATTTTAAATTTTAAAATTAAAATTTTAGGATAATT  
TTCAAAAACCTTTCCCTTGAAACACATACACTCCCACCGTTACATGCATACT  
TTCCATATGCCGCATCTATTAGAATTAAGTCAAGACAAAAAATGAGAATG  
CGTCCCTGTATATTAGGAATTCCTTAAGGCTAGCAACTAGGAAATACTCA  
CATAACAAACCTGTAAGCAGTATCTCCATCCCAAAGAATGGAAATGTGAA  
TAAATTCAGGGGTAGCTTACTTTTTTCACTGTGGAATAACCACTTCAACAG  
GATTTTAGTTATAGAAGTTAATATTAGGACCTGGGTTTGATTTGGGAGGG  
GGAGGGCGTTCCGACACCTGATGCAGATTTTCTAGTATTTTAAATTGGTT  
ATACTTAACAGATCTAAGTCTGCACAGCATTCTTCTTTGCTCTTGTTTGA  
TTTTTGCAATTCCTTTTATCAAATTCCTAATGCCTTATTGAGGGGCGAAAATG  
TGTCACTAGGAGGTAATGCATTTGGTCCTTAGTGATTTGAAGGAGAGACA

CATGGACACAATGAAAATGCAATCCTGACCTTCCTCTCCTACTGGGTGAC  
ACAGAATGAACTGCGATGGCTACAGTTCCACACATTGCTGCTGTCGCATG  
TACTGCACTTGCAAAGACTGTGTAGCCTATCTTTGTGAAATATGCCAAGG  
TACTTCCTCTTGTGTACTAATTAATGAGTGGCCTAAGGGATGCCAGAAGG  
CAAGGCTACTTCTCTGGCTAAAAAGTGGGTTTCTCTGAGGCCCATGGGCA  
CTCCAGGCTTTGGGGCTCCCCATCAGATCTTTTCTGGGGATACCTGCTCT  
GACCATGACTATTCCAGGACCTAAGAGTTCCTGTATCTAACTGTTGTCAT  
TAGCTAATCTTTCTATTTTATTTTCCTTCTATATTTTCTGATGCAAGAAC  
TCTGAAAAGATGCTTCATGTGATTTGGGAAAACAGAGACACTGCTCTGGT  
TTTATCCTCCCATGAGATACTGTGGATATGAGAGAGCAGGCATAGCATTG  
GGAAAAGCAAAATCCAGGGCACCTGGATGGCTCAGTGGTTGAGCATCTGC  
CTTTAGCTCAGGCCCTGATCACAGGGCCTGGATGGGGTTCCCTGTGGGGA  
GCCTGCTTCCCTCTGTGCCTATGTCTCTGCCTCTCTCTCTGTGTCTTTCA  
TGAATAAACAGATTTTTTTTTTAAAAAAAAGGAAAAGGAAAAATCCAAAA  
TCTTAAGGAGAAACAGCAAGTTAAATATGGCAGATTTCTTCTCCTCCCA  
GCCTCATTAATAAACAATAAAATTAACATTAAGAAGGAGAAAAA  
AGAAAAAATAAAAGGAGAACTCTACAAAAACAAAAAATAGAGA  
GAACTCAAATACAATTGAGAAATTTCAACAGACTTTAAGAAACTGCAGA  
TTGAGGAAAGGAAAGACTTGGCAGATAGGAAGAATTTGCAACCTAAGAG  
TTTGACTGGCCCTAAAAATCTCATAAGAGTTAGACTCCAGACTATGGCTA  
CTACCCAGAGGTGAGGTAAAGTGGAGTGCTGAGTATACACAAAGTAGTTG  
AAAGAAATGGGAGCCTCAGTTCTGAAACAACAAGGAAAAGAAATCTCTCA  
ACAATGTGAGGGATCCTGGGAGTAGATCTATCTCACTGGAGCCTCTGATA  
AGACCACAGCCTTGATTTTCTGCTCAAAAGAGAACCTGGAGTAGAAG  
ACCCAGATGAGTCATGCCAGCACCTGACTTACAGAACTTAGAGATCATA  
AATGTGTTTTAAGCCCCTGGGTTTATGGTAACTTGCTATGCAGCATCAA  
AACCAATACAGTCTCTCAAACTCCTTCCCATATCCTCCACCTGGAATTTT  
AGCAACTAGGAGTAGAACCCATCTCAAGAAGATTAAAGAATTGTTTGCT  
TTAAAACCTAAGAGGTGTGATTTACTTGCCAGAGGGACTTCTAACTAAAT  
GGCCAGCTGCAGTCTGATCACCCACATGCAAACCCATTAATAATATGC  
ATCTTGATATTATATGTATGTTATGGAATTCCAAAGGTTTTTCTAGAGT  
TATACCAGAGGATCACCAGAAATTTGAATAAGAATTTCCAATCTGAAGAC  
ACCAACAAACAAATTAAGGTATCCAGAGAAAACAGAGGCAATTCAGAT  
GAAGAAAGAAAGAAAGAAAGAAAGAAAGAAAGAAAGAAAGAAAGAAAG  
GAAAGAAAGAAAGAAAGAGAAAGAGGAAAGGAAAGAAAGAAATTAGAATTCA  
GGTTCCTATAAAACATGTCAGATCCTTTTTATTTTCAGATATCCTTTTGA  
TGCTCAATTACTTTTGATCATCTGTTAGCTAGGTACTATAACTTCTTTGT  
AAGGGCAGAAAATAAATGTTTTTTCCCTTATTACTTCTTCCTGATTCTG  
AGGACCAGTGCTAGTTCAATCATTTTCATTTTGTGATAATAGAGACCTAA  
TTCAAAAATCTTTTCAAAGCTTTGTGATCTTTTAATGCCAAATAAACATA  
CAACGAAATTGTAATTTTTAATCTGATAGTCAAGAGCTGAAAGAAATGTT  
AGGATAAATGAAATGAGTTTTGCTAGACATTCTGAAAGGAGGTATTTTTTA  
AATGTTACCTTGTGATAACATATGTCAAATGTATTATAAGCATTGCTATA  
ATCTCCTCTGAACACTACTTGTCAAACCTTACCTCCAATAAAGCATAACT  
GCTGGAGGATTGGCTAATCACAAGTAAAGACAGAAAGTAAATCCTTCCT  
TTTTTCTGTTGAATCTTCACAAAACTTGCACCTTCTGTTTCTCATCTTT  
AGAGAAAACCTCATGTGTTTTTCTGAGAAAAATACTCTTGAAATATTGA  
ATTAATAAAAAAGTCTTAATTATAACATTTTTTAAAAAGATTTTATTTA  
TTCATAAGAGACAGAGAGAGAGAGAGAGAGGCATAGATAGGCAGAGGG  
AGAAGCAGGCTCCATGCAGGGAGCCCGACGTGGGACTCGATCTCGGGTCC  
CCAGGATCAGGCCCTGGGCTGAAGGCGGCACTAAACCACTGAGCCCCCGG  
GGCTGCCCCCTTAATTATAACATTTTAATGATGATTTGCCGCATGTGTTAA  
AAAAAATAGAGAGAGTGTAGTAATTAGGCACTCTACAGATCTTTTCCCCA  
GAATATAGAAATCAAATAAGAATTCATTGGAAAACCCCTGATCTCCTACT  
TTCTTCTTTAATTAATACTTATAAATTATTTGAAGTATTTTCCATTTTTTA  
TTTTTGATATTTTAATTTGGAGCCCATCATCTGGTCTACAGATTGTGGA  
GTCTTGTAAGAGTTTAACAACCAGAAAAAATATAATTAAAGCCCTAATG  
TGTATTTTTTTGCAGATTTCTTATACGTAAATACTATCACAATGGTCCAT

TTTAAGCTACAAACGTGCTATCACTGAAGGCGAAGTTGGAAAGAGATGCT  
CACAATTGGTTCTCATGAGCCAGTGCAAGTCAGCTCCAATATACCACTGT  
ATTTAACCAGTATATTTTCATATTTTCAGGCCCTATGATTCTCAGATGCTTT  
AATTTAAAATAAGTATATGTTCAATTTAAAAACATGAGTATATCATAGAG  
CTTGTGCCAATGGATGACTTACTTTTTTTTTTCTCTGGTGGTGATTTGAA  
ATGTTTAAAATATTACTGATTTTATGCAAAAAAATACTAGGATTGCTTTG  
ATGATTTAATGTTGCTACATATATTGTTGGTGCTAATGGAAATGATCAAA  
ATTAACTTGGAATAATTTAAATTTGCTTCTTTTTTTCTTAGTGATTTCTC  
TAACTCAAAAGCATCAATATACACCTTTTTTCTAATCTCTAGAAAATTATA  
TTAGGGAAGTATGCCCTTTTAAATTTGATAGATACCATCTCCACATTATT  
TGTAAGTTTATATAAAATTCAGATCCATGAAAGATTAGTAAGAAGAAAAAT  
AAGAGAAAGTGTTTTGAATGTAGCCCAATAACAAAACAGTAATTCTATAA  
TTACACAAACACCGAAATCACCAGTTCTAATTTCTCTACTTTCTCTTTCC  
ACTATTAACCAACGTGATTTACTGAGTCTCCTGGTTTTCACTTGTGCTCAT  
GAAATTCCTCATGATTCTAAAAAGCTGAATGGAAGTATGATGTAGAAAATG  
ATTGCAAATAGAATTTTTGTGTACTAATTAAGACTAATGTTGTGTGACAA  
AAATGCTCCTGGTGATCCTGGAAGGAAAGTGAGCCAAGTTTATTCATGAG  
AAAAGTGCTGTTTTCTCTGCTCAGAGAGAGAACTGACTCTCTGTAAGTC  
AGGCTCCCCACCAAAAACAGACCCCTACATGGAGATGTATGTACAAAAGA  
TTTCCTTGAGAGAGGTCTTAAGCCCATCACCTATAAGGAGCAAGGAGAGA  
AGGACTGAAGGAGAAGCAGATGCATCACGGGGTTTAGCCAATCCAGAGGG  
AAGTCTGCAACTGGAATGGTCCTTTCAAGATGCCTCAAGTCAAGGCAAA  
GGAGTGAGACCTGATGCAGAGACAAATCACTGAACATAGACCATCCCCAA  
GGAGGAGACATAAATTCTCTTCAGCCAAGGACAATCCTAGAGAGGGACTC  
AGCTGTGTCAGCAGGAGATACTCCCAGCGTCTAGAGTGAGTGCCAGGAAT  
GAGAGCTTGGATCTGGAAGTAGAGATGCTGAGGACCCTGTTTCAGAGCACT  
GCGAGTACAATCTCATTAACAATGAACCTCTTATCCTAGCTCTACTTCT  
TTTCATTATTAATATTCTATTTTCAGTTTTTTTTGAAGCTGAGGAGATCGTA  
ATTGCTTCTTAGTCATTTACATTCTGTTTGGAAGTGAACAGTTTAGTTTC  
TCTACATGTTATTATTTCTAAACTATTTTCTTATGGAGTATCATTCCCTT  
AGCATGAGATGTTCAAGCCACTGAATGCAGATAACAGATACAATATTAAG  
TGTTAGAGGAAATGTTTCACGTTTTGTGTTTTTCTTTTTTTTTTAAGAT  
TTTATTTATTTATTCATGGGAGACACAAAGAGAGAGGTGGAGACACAGAC  
AGAGGGAGAAGCAGGCTCCCCACAGGGAGCCCAATGTGGAACCTCCATCCT  
AGGACCCCGGGATCATGACCTGAGCCAAAGGCAGACACTCAATCACTGAG  
CCCAGGTGCCCTCACCTTTTATGTTTTTAAGAAATGAATTTGTTTGAGTA  
TGATTTTTATTACAGTCAATCGTGAATGGCAAAAGTTGGAAAAGCCCTTT  
GATGTTTCTTGATTAGGTAAATCCAAGCCATTTATATTCCAGTTAATTTA  
CACAGTAACATCAGTGAGGTCATAAATAGTGGGTGTATTTTCACAGGAGC  
TAACCATCACCTTTAAAGTCCAGATGTGGGATCCCTGGGTGCCGCAGCGG  
TTTGGCGCCTGCCTTTGGCCCGGGCGCGATCCTGGAGACCCGGGATCGA  
ATCCACATAGGGCTCCCAGCATGGAGCCTGCTTCTCCCTCTGCCTGTGT  
CTCTGCCTCTCTGTCTCTCTCCGTGTGACTATCATGAATAAATAAATAAA  
ATCTTTAAAAAAAATTAAGTCCAGATGTCCCAAGGTACGTCTTGTTG  
AACTAGTTATGAAGCTTTCATGGTAACAGGATAGGGAACAAGTATTAATT  
GGATAGGAGATGGCATCCAACATGGATTACACTTTATATTCTCAGGGTTT  
TCAAGGTGAATGTCTTGCAAGTTATATCCTAGTTTTTGAACCTGTTGAACA  
AGAGATAGAGATTTACCTTTTCAATGTGCCTGTGTTATAACCTATTTTAT  
TAAGTGTGTGTGTGTGTGTGTGTGTGTGTGTGTGTGTGTGTGTGTGTGT  
TATTTGACAATTCTGGCTTCAGTTTTTATCTCTCAGGAAAGCTAAAGTAGT  
GGATATAAACCTACACTTTTCTGTTACATAACAACATGTGATTTTCAAAG  
AGGGGAAAGTAACTATTTAGCCTAATGTGGTTAAAGAATTTCAGGGTTAG  
ATAACAGCCACATTTTCTACTTCTCTTTTCTTGCACATTATATTCAATTT  
TAACCTCACTGCTTTCTAGATGAAGCATTTGAAACATAAAAAAATTACAG  
TTCTTGACACATAAAGGCTTAAATAGTTATTAATGATATTCTTCCAAAG  
GTAATTTATTAATGTCATCATTGGCATCTTGGATCATCATAAATAGCCTA  
GAATCTGAATTTTGCTGATACAGTATCTGTTCCCAGCTAAACTACTGGT  
CCTCATAATCTATGATGTTTCATCATTATATATATATATAATGTATATA

TATACATAAATTTATTATATATATAAAAATTCATAATTCTCTCTTTCTATA  
TATATATATATAATTTTTCTTGATTGGGAGAAAATTTTCATTTTTATCCC  
AAATATTCTGAATGCATAATAGAAACATTGTCAACATCTGGTGGAAAAC  
CCCACCAGAAATTAATTACATAGTGAAATATTGCATTTGACTGTTTCCAA  
GAATCCAAAACCTTCATCATACTGATAATAGGCAATTGGGCACTCAGGAT  
ATTGAGACAGAATAATTTCTAGGCATTACACTAGGGAGGAAGACAGATT  
TCCAATGGGCCCAGAGCTGTTGGAAAGGAAACAAAGAATAAAATTTCTTA  
GTCTATCTCTTTTTTCACTTCTAAAATGCTAAAAATCACAATTCTCTGTCA  
CCCACACTATTTTTATTTTTGATTTAAAGTATATTATCTACATAGTCTCTAT  
ATGTTTACTAATTGTCTCTCTAGTTATTTTAGAAGTTATTGAGCGAAGGC  
TATTTAAAATTTCTCTATAAAATACTGTTGGAACAATTGGATACCTATATGG  
AAAAAAAAGGAACTTTGAGCCATGCTTGTGCCATATACAAAAATAAACAG  
AAAGTGGATCATGGACCTAAATGTAAAATGTAAAGCTATAGCATTTCTTA  
AAGAATACTTAAGGGGAAAAATGGCTTGTTAAAATTTGGCTGTGTAAAAAT  
TCCTTAGACTCAACCCAGAAAGCATGAACCACAAAAATTGATAAATCATA  
TTTTATCAAAATTA AAAATCTCTGTTCTTCATAAGACATTGTGAAGGGGA  
TAGCATGACCATAGATTAGCAGAAGATTTTTGCAAATAATATATCTGATA  
AGAGACTTGCATATAAAGAATTTTTAGAACTTGAAAAAGCAAAGCAAAC  
AATGGATTTTTTTTTTAAGAATAAAGAATTTAGCAAGCACCTTACCAAAGA  
AGATACACAGATGAGGAATAGACACATGAAAATTTGGCTCAACATTATTAG  
TCATTTAGAAAATGAATTTTTAAAAACACAATGGAATATCACTTCCTACTA  
AATAGAATTGCTAAAATTCAAAAGACAGACCATACGTAGTTTTGACAAAGA  
TGTGGAATAATTGAAACTCTCATGTACTGCTGGTGGGAATGTAAACAGAT  
AGAACCCTTTGGAAAAATCATTTGGCAGTTATCTAAACATTTAAAAATA  
AATCTACAGTATAACCCAGCCATTCTACTCCTTGGTATTTTAAGGGAAAG  
CATGTACCCATATAAAAAACATGTACAGGAATGTTTACAGAAAGTTGATGC  
TCCTGTATGTGAAAGGATACAGACTGACAAAAATGTATTTGTCCATCAA  
CAGGAAAGTGGATAAAAATAATTGTTTTCTATACATAATGTTCTATTATAA  
TATATTGTTATAAAAATAATATATACAATATAAGTAATTATATTATTATTT  
CTATATTATATAATTACATACTATTATATCTTAACATTATATATATCATG  
GGCTATTAGTAATACAAAACAATGAGTTATTAATAAACATCACAAGATGG  
CTGAGTCTCAAAACAAATGTGCAGAGGAAAAGCAGAAAGACAAAGAATAC  
AACTGTATGATTCCATCTCTGGAAAATTATAGGAAAATTCAACTAAAAT  
ATAGGAACAGAAAAAAAAGATTGGATACCTAGGGATGGGCGTGCAATAG  
AAAATGTAAAGAAGAATTGTAAAGGGGTACAGGAAAATTTGAGGGGCTAA  
CACATATGCTCAGTGACTCTATTATGATAACTGATTTACAAGCATCTAAA  
TAAAGCAAAATTTATCACATTGCAGACTTTAAATATGTGCAGACAATTAT  
ACCTCCATAAAGCTATAAAAAATTTGGAAAAGTAGTTGTCACTAGGGGAA  
AGGGAGCAGTCTATGATAGAGAAGAGCTTCTGGGATGTATCAACATTCTG  
TTTCTTGACTTAGGCATAAAAAACCCAGGTGTTTTTTTTATTACACTTCA  
TTCAGCTGAATAAGACACTATTTTATGTTTATGCACTATTTGTTTATTGT  
ATTTTATAAATTTCTAAAAGTTTAAAAAATAATATATACATTATATTGGAA  
ACTATAATTTCTTTAAATAGGTAATTATCCCTAAAATTCATGAATTTTG  
TCATTATTCCTTAATAACAGCCTCAATAATTACTCATTACTTATAATTAT  
TTCTTCATAAATTGTATAATTCTTAATAATGCCAACCTGGGCCTTAATAG  
TGGTATATACACACCCCTTTATGTGAATTTATAAATTATGTACAGTTTAG  
GTTTCTTTTGGAAATTGAAGCTGGTCTTTACTTTACATTCTATGCAAAC  
TGCTTTTAAAGATAAACCCAGAAAACACAATTGAGTCATATCTCTTTGA  
GCCTCGTTGGTGGTCCATGCATCATGGAATGTCTGTTAATTTTTCCGGT  
GGTACTGCTAGGTTTATGGCAACATTTGGAAGAGTGGCAACTGGGAATAG  
TGACTATTTTTATTTTATGTTTATCTTTATGGCTTAACCATATTCTGTAGT  
CATTAGGTACAGTGACTCTCTCATCCCCTGGGGTACAATATTATATTTAT  
TGTACGCATTTATCTTGTCTCTGTTGGTTCATTTTCTTTTCCATCCACGG  
TGAATTTCTTTCTGCCTTCCACATTACATCTAGGAGTCCTTGCATTCAA  
TTGCTCAAAAGACATTATTATCATGGAGTGAAGTCTATATGAAGTCTGGG  
AGGAAGTGTGTGTATCTATAAATGGCTTCAAGAAAATGTCCTCAGTAGTC  
AAGGAGAATGATGATCATGTGTCCAGAATTTAGAAGTGGGAAAAAATTTA  
TAAAATATTAGTGTCCATAGAGCAAAATGAAAAACACATCCAAATGTTAT

GAAGGAAAAACATAATTTATTAAAAAAGGAAACATTTGAAGCAGTGACGG  
GGATTGCTTTCTCAGTGATGGTCCTGGTCTGTGGCACTAAAGAATATCAT  
TTTTCTTTTGAATAGGCCCTAGGTCTTATGGATACATGATTATTTCCATT  
TTGAAGATTTATGCCAAGGAGTCTTAATGCTAAACCTGAGACAACAGAGA  
GAATCAGGTTCAAAGTGAAGTTTAGATTTTTGTACCGTGTATTTTGTAC  
ACACAGTAAGAGCATCAGCCATACTAAAGCACACATATTGTGACCTAAT  
AAGAAAGAACATACAAATCTGTATACAAGAGAAGAGTCTCTTATGGAACA  
GGTTCCTTTTATACTGAGAACTAGCATGGACACTTCAAATGGTAATCTTTC  
CCATTTGCACCATTTCATAAAGTCATAAACTCAGAAAGACATATTCAAATA  
AATTGTATGCTCTAGTGAACCTACTCTTCTCCTCCACTACCTTTCTTTTA  
TGCATGTTTTTTCATTTAACCATGATACAATCATCATTTGATTTCTCCTTT  
TCTGGACCACATTTAAAAAATAGTTAAATAGCATGTCTGCTTCAGGCCTT  
CAAATTACTTTATCATTAAAAAAAAAAACCTATGTTAAGCAAAATGAATA  
GGTAAACGAACTTATGGTTTTTTGGCAACATAGGTTTCAAAGACACTTTT  
TGTTTTACCCAATAAAAAAATTTACCTCTTTTGTTTTATGAACCCATTTTAC  
TTCAAGTATTTCCAGGCATCTCCCTGCAATTAAGTTGCTTCTAATTTTTT  
CCAGCTGTGATCTTAGTTTGTGGGGGGCATTCAATAGGCTATACCAGTTC  
TAAGAATTACACTGTCACTTATGTGCAGAAGGCATGATACTATACATAGA  
AAACCCTACAGACTCAACCAAAAAATTAGAAGTTCCAAGTGAATTCAGTA  
AAGCTGGAGGATAAAAAAGTTAATACTCAGAAATCAGTTATGTTTCTATAC  
ACTAATAACAAAGTAGCAGAGTGAGAAATTACTAAAACAATTCATTTCAC  
AAATGCACCAAAAAGAATAAAAAATCTAGGAACAGACTTCACCAAGGAGC  
TGAAATACTTACTCTTGAAATTATAAAACATTGATAAAAAGAAATTGAAAG  
CAGCACAAATAGTAAGCTATCCCATGCTCGTGAAATGGAAGAATTAATAT  
TGTTAAGTGTTTCATACTGCCCCAAGCGATCTACAGGTTAGAAACAATCCC  
TATCAAAATGTCAATAGCATTTTTTCACAGAATGAGAGCATATAATACTGA  
AACTTGTATGGAACCACAAAAGACCCCTATTAGCCAAAGCAATCTTGAGA  
AAGAAGAACAAAGCTGGAGTTATCACAATGCCAGATTTCAAGATACAGTA  
TAAACTATAGTAATCAAAACAGTATGGTAATAGAACAAAAACAAACAC  
TTGAATTAAGTGCCTTACAATGGCAATATACCTGTCTATGAACATTTTCA  
AGCAATGTGAATTAAAGAGAGACAATTGTACTTTTCTTATTTGAATC  
ATTAAAAGTCAAATAAAAAAAGACAAATCAGTTATGCTTGTTGAGGGT  
GACATCTGCTGCCAATTAAGTCTTATCGTTAAATTGAGGCAGGGGGGAA  
TGTTGCTATTTCTTTGAGATAATCCTACAGGTATTTATAGTTGTTGGGCA  
ATTCTCAATACTTTTCAATTTTTTAAGATCCACATAGTATATGCTATAAAAT  
GCATTACATTATATTACTTTAGATACACATAGTTCTTCTTACTGAAGTTT  
GCTCAGTACAATGCAAGGTTAGATTTAAATGATCCCTTTGCCTCATTTT  
CTACATGAGAATTCAAGCACGCAGCATAATTTTTTCATCAGGTTTATGCAA  
AGGTCAATACTATCCATTCAATTAATGGGTAAATATTTCTATCCAAAAA  
TAAATTTGCTAGAAATAGTGCAGATCTTGTGTTTCATTTTGAAAATAATAC  
AAGCAATTCCTACTGTTTGGAAAATGTCTTCTGGAGAGCTCTCTCCATCCC  
ACAATCATGATTTGTGAATGATACCACCAGTTTGGCAAAGTTTTCATCTC  
TTCTGGGGAGAGAGAGGTGGAAGAAAGCACAAATTGTTTCTAAATTACAT  
TATTTTATTGTTTTAATAAAATGAGACTGACCTTTCCTTCCATCAGCAG  
TTGAAGGTACCAGTGTGTAGGAAGGCATATCCATACATCTCTAGAGGAAA  
TCCATCTGTAAGAAAATAATGTTTCATGACTTTATCTGCAAGGAGGCTCT  
AAATAGGGCATAGTCATAAAGGAGTCATCTGGGACAGTAGACCTACCTAA  
TCTGTCAACTGTTAGAGCAAAACAAATGAGATACTGTTTCACACTAGCCA  
ATATTTACTAAAGACCTACCTACATTGTTTTTAAATCCTTGAAACATCAGA  
GGCAGGGTCAGTCCTAATGTCTTAATTTTATGGATGAACAAACAAAGAGT  
TCAGAGAGGTTGATACAGTTGTTAAAAGACAGAGCTAGGCTTTGCTTCCAG  
GTTTGTCTGGCCCCACAGCACATCCTTTTTTCCCATTATGTTAGTCTTATT  
ACTTCTTACTTTGAAAGCAATATAAAGAAGCTATTTTAAGAGTAGGTGAA  
GAGTCACTGGACCTCAGCCTTCCTGTATATGAAATTGCAAAGGAATAAA  
CAGAAATAATAACAACCGAAAAATATACCTTTACAGCCAGCATCTCAAAT  
AAGAAACATCCAAAGTGGGACCCAAAGCAACGACTTCAGCTTTCTCAGAG  
TTATTTTCATGAATGTTCTTTTCATATTGAGCTGCTCTTAAGTTTTGAAAG  
AAAGTAATTATAATCATGATGGTGATGATGTTGAAACTTTACATTTCTAA

CCAACTCAGCATCATTGCATAAGAAATCTTATAATGGTTGGAAGGAATGC  
TTGTCTACAAGTCTACTCCAATTACATAACAGTAGCACCAATGGGCACTG  
AGTGATAAATATACTGAAACATGAAATCAGTCCTTTGAATTTAGGTACAG  
TGCCATTTGTGCCAAATGAAGAACCAAAACATGAAACAATTTTCAATTTTTA  
ACTTAAAATCATATCTTGTGCAAAGCTGACATGGTTTTACGCTATCATG  
GTATCATTACATTATAAGCACAACTCCAGAAAATGATGAACAGTAGAGCA  
ATCAAATCCATGAAATTGTTTATCTCTGAGAGATCGTGTCTCGACCCTCA  
TCTAGCTTTTTGTTTTAATGTGCGCATTTTTTTTTTAAAAGGATCTTAAGGTT  
CTTAAAGCCACGTTTTATCCTCTGCCAGATATCAGGACTGTTGTTATTTT  
ATTCAGTTCTCTTCTCATAATTTTCAGAAAAATCTGAAAACATAAAGGTTA  
ATTAATTTCTGATGTCTTACAAATGATTGACACAGTCCAAGAGTTAAAGA  
AAACACATTTTTTTTCCAAGTTTAAAGACCTGAGATGGGATTTTCAGAATCA  
AACGTGCCTGCGGATTGCTTTTTCAATGGTGGGCCTTGCTCTTAGATTGTC  
CTTTTTTCCATTACCATTTCCAGGTTTTTTTTTTTTTCCAAAAATCTCCTGTGA  
GGTCCGAATAGTAGCCAGCATTCTGTCTTTGGCTGATGAGCCTGTACATT  
TCCTAATCCAACACTTCTCTTAAAAAAGGAATGTAGAAAATATATTGCAA  
TTAATAGTAATGGGGGTGTCTTACAATTTTCCAAACCTTGAAACTTGCC  
TGCTATTCTTTCTTATTCTTGGTTGAAAGCAAAACAATCAAAACCCAAG  
GAAGGAAAAGAGGCCCGGCTAGCAGAACTTGAAGCTGCTGCCAGATGCTT  
CCCAACCTTTATCCCTGGGTGTCATTTTGTTTTTTACGCCATTTAGGTATA  
CTTGTTCAAAGGCTTTTCAAAGTGCGACAATCCTGCAAAACGAGAGTTA  
CTACAGCCCAAGGGCACTTTCTCTTTCTTACTCAGCGAGGCTTGGTACAC  
ATCTGTTTCCATCCACAGTCACTTGTTTCAAGGCACCTGCGTTATGTCTC  
AAGGCTCTGTTTTGAGCTGCTCTCAGCGCCTGTATGTCCCTGCTTCCCCT  
GCTTCGGCAGTGTTTTCTGTCCCTCTTCCTCTGTCTTTTCTAAGAATTT  
ATTTATAGTCCTTGTTGCATACAACCTTGAAACTCAGAAATGGGAGTAGAG  
CTGGCCAGCCGCTCATTTGTCTGTTCTGAAGCCCAACAGGTTTCATTCAA  
CCACAGACTCCCTGGAGGGTCTTTGGGTTCTTGCCCTTCTCAGTTTCAGGG  
GGGCTCCTTGCCCCAGTGAATTTTTGGGAAAAGCATAGCAGCCTTCACT  
AATCTTGAATGTACTAGGCATCTAACATGAATCTAATGCTGTGTGAGGAC  
CTGAAGGTGATACCAGATTGTATTACATTGTCCCTTACCCCAAGACTTTGT  
AGCAATTCAAAAAAGATAATTATTAAATAATAATTATAATAACAATAATA  
AAAGATGAAGAGAGGAAGAAGGAGGAGAAGGGGAATAAGTAGTAGTGGTA  
GTAGTAGTAGTAGTAGTAGTAGTAGTAGTAGTAGTAGTAGTAGTAGTAGT  
AGGATTCTAATCCTGGAGCAATTTTTAGGGAAAAAAAAAATATTTCCAAG  
TCTGGGATAATCAAGGAGGGCTTCATTACAGGTGAAACTCTAACAAGA  
CATCAAAGAGAGGATAGAAAGAGTGGAACCTTCCTTTTCTTTTCTTTTCT  
TTCTTTCTTTCTTTCTTTCTTTCTTTCTTTCTTTCTTTCTTTCTTTCTTT  
CTTTCTTTCTTTCTTTCTTTCTTTCTTTCTTTCTTTCTTTCTTTCTTTCTTT  
AATACAGAGAGAGAGGCAGAGACATAGGCAGAGAGAGAAGCAGGCTCCAC  
TTAGGAAGCCGGATGTGGGACTTGATCCCAGGTGTCCAGGATCATGCCCT  
GGGCTGAAGGTGGTGCTAAACCACTGAGCCACTCAGGTAACCCAGGTTGG  
AATTTTCATAAGCGATAAAGAACAGAAATCATACTGATTCAACAACACTT  
TTATCCACTTTTTCTCTATGTATCCAATCTGCTAACGTGTATTTAGTAC  
ACGCAACATGCCAGATATTTTTGTTAAGGCCTCACAAGGACAAAAAGATG  
AGCAACCAAAGTCCCCACCCTAGCAAACAAGGATAAAATGTATTGAGGAT  
GCAGCAAAACAATGGTAACAAAGGTGATATCTGCTTGAGTCAAGAAAGTG  
CAAAGGTTTTCTGGGAGCACAGTGAAAAGAGTGGAATAATAGCAAAGTACT  
CCCAGAGAAGTTAATAGTGAACATTTGAAATGAGAGGGACTAACATGACT  
AAAACCTTTATTTTAAATATAAATTAAGAACCAAAGCCAGAGTGCAAGAC  
TCAAGAAGAGCCAAAGATAAGGAGAAAATCTTCCAAAATTTTATTCTGGA  
GTGAGTAATAATATTGATGAATGTGGAAGATGCCTCATAAAGTCAGATAT  
TCAGAGATTTTAACATTAGAAGTAATTTAAATAAATATATTCCTGTCCAG  
GGGTGTCTGTGTGGCTCAGTGGGTGAAGCATCTGCCTTTGGCTTGGGTCA  
TGATCCTGGGGTCTTGGGATCAAGCCCCACATCAGCTTCTCCCTCTTCCT  
CTGCCCTGCCACTCCCTCAGCTTGTGCTTCTCTCCCTTTCTCTCTGCCAAA  
TAAATAAATAAAAAATCTCTAAAAAAATATATTCCCATCTGTTCTTATTAG  
TAGAAGGGCCTTAAGCCATAGCTCCCCCTCAAATTCATAGATCAAGTG

CACAATCAAAGTGCACCTTAGGTTTATCAGCTGATTAAATCCTCCTGACAG  
GACAACGATTATGATGATGATGACAATCCCCTTTTTACCAAAGAGGAAAC  
TGAGGCAGAGGATGATGAAGCAGCTTTTTTAAAGGCTCACAGCTTCTAAG  
TTTGCGAGTTGGGCCTAGAACGTGGGATCCTGGATCTGGTTCTTGAATTC  
TAAACTGTCCGGCTACCATTCTCAGGCTTGAACCCAGAGAAGGAGGAGG  
AGGAGGAAGAGGAGAAGAAGAAAGAGGAAGAGGCAAGAAGACATAGTGTT  
GATTCACAAACTGGCCCCACACACGGAGAGCCAGGAGAGATGGGAAACAC  
AGACAGGCCACTCCAGGTGGGCAGGTGGTGGGTTCAAGAAGCAAAGGGGA  
GTTAACTTATGAGACTTGTCTCTGGTGCTGCCAAAGGAGTAGATCTCCAC  
ACCCAACACCATAATCTTCAGTGTTTCTACAAAGGCCCTAAAGAGGCTCC  
ATCATGTATACCATCTTTCTCAAGGCTGTGTCTTGGAAACCGTTCCCAC  
TGTCATCCCAGAGGGTGGAAATATACATTGTACATTTCAAGGACAGGGAGG  
GGTGAGGAACCTCCAGTGCCCCAAGCCCAGCTCCTGGGTACATGTGGTC  
ATGTCCTCTCCATGACCTCCTTCAACACTCCTGGTGACTGGCTCCTAGAA  
TCTCTTATGCAGCATCCCATTTCCACAATGTGCCCTGAGCAATCAGCAAG  
CAGTTTTGTGAGCATGGAGGTGGCTCATTTGGTGGCCGTCTGGCTGCATT  
GCGGCAGACGCCACAGTAACATTAGAGACACATGCAAAAAGAAAACACGGC  
TTACGAGAATGATTCTCGTAATGATTCAAAATAAGTACCAATTTTTTTTT  
CCTCCAAGAGCTCCATAATCCAAACCACTGATTTATTATGCCCCCTAGGC  
TGGGGGTGAGATCCCTCAGGGCATTCACTCGCAACCTCATGTGATTTACT  
AAAGATGATACAGTAGTGAACCTTATCAGGTATGAATATACACCATTGGAT  
ACTGGCACAGGTAACTTTTTGAGAAGCAATAATGTCCAAGGCTCTTCTAT  
TTTGAAGGACAACTTTTCCCATTAGAGATATTTAGAGTTCAGTAAGGAC  
AGACTTTGTCAACTATTATTTAAGACTTGTGGGTGAATTTGGTAATGGC  
TTCTATGTGTGCTATAATGTCCACCAAGTCAATGGAAGGAATAAAGACAG  
CAGCAACCTTAGCAGAAGAAAAGAGAATATGCCCATCTAGTCTCAAGGAG  
AGGGTGGTTGGCAACTCTAGGAACCTGACTGGGTGTAAATACCATACAT  
GTTGCATGTTGGCTGCAGGAAGCAGCAATGTGAGATGTGAGGAGATGGAC  
TTGGAGCCAGATATTCAGTCCAGAACCCTTCTACCTTCTCTTCTTTCA  
ATGGTGCATGTTCTATTCTGATATAGTGCATTTCAATAGGTCCAGCTTG  
TGGCAGGACAATGGGGTCCCAGTGGAGATTGAGTAGTTCCCTCTCATCTA  
GAGGTACAAAGTAACTCACCATTTCCAGTGGGAAGTCTCAATGCAAATTC  
CAGGACACAATGCCTTTTCGAGGTATGATGGGACTTGGTGTTCTCGGCAG  
CATGCATATTGATCCATGGTGAGGAGGAATCAGTGGTGGTTTCTTGCAAC  
TTCCATACATTCTTAGTATTGAGTATATTAGCAGGGGTCCCCATTCTGGA  
ATACGGGGCAGATATCTTACTCTTGTAGCAGACATAGAAAAATAGAAGAG  
GGGCACCTGGGTGGCTCAGTCATTTAAGTGTCTGCCTTTGGCTCAGATCA  
TGATCCTGGGGTCTTGGGATAGAGCCTTGCATCAGGCTCCCTGCTCAGCA  
GGGAGTCTGTTTTTCCCTTTCCCTTTGCCTCTCCCCACCCCCACTTGTG  
TTTTTTTCTCTCTCTCTCAAATGAATGGGTGAGAAAAATCTTAAAAAA  
AAAGAAAAATAGATGGTATTTAAGTCTAGCTGTGCATTAGGAAGGCATT  
CCTTCCCTTTTGCATTTTCCCTAGAGACGTGAAATTGAGATTTGCATGGC  
TTCCAAATATAACCTCTGTAGACTACTATTTTCTTGAAGGACTAGAATT  
TCTGAGTCCCAACTATGAGTAAGAAGTTCAATTTTGTATGATTTATATGT  
CTTGGAATGGACTGCTTATAAAATAACTTCTAATCTTCGAGACATACGGA  
GCTTCCATGAGTGACAACGTCAAAGTACAAATGTTTTCCAAAACCTCAGA  
ACTGTGACTTACATTACAGTAACACATATCAAATATTTTATTCAACTTAT  
TAATTAATGAGGAATCCAGTAAGATGTTACAAGTAGTTCCAATGAGAATT  
TGACCCACAGAAATGTATATTTCTCAAATAAACAAAAATAATTTACATTGC  
AGCGAACAGGAACATTTACATTCAAAGTTCAAAGTTGTGATATAGCCAA  
ATTCAATGGCAAATCAGTAAAACTACTCACCTATTTCCAAGGCCTGGGT  
GGTTTTCCCTGACATGGAAATTTCTTAACAATTAAAGTAGAGGAAGAAATC  
ATAGGAAGAAACAAATGAAAAACAAAAACATGGCTATACAACAGCTATA  
CAATGTTGTAGGGCAGGAAAAATAATATAATGAAAAAGATTTATTTAAAA  
TATTGGCTTTAACTATTGTGTCTGCAAATTTTTTTTGAAGATGCTATT  
TATTTATTCATGAGAGACACACAGAGAGAGAAGCAGAGACATAGGCAGAA  
GGGGGAGTGGGCTCCCTGTGAGGAGCCCAATGCAGGACTCGATCCCAGGA  
CCTGAGCTAGAGGCAGATGCTCAACCACTGAGCCACCCAGATGCCCCATG

GTCTGCAATATTAAGTTGTTATTGCTGTTGTTATTTTTTAAATCTGAGAG  
TCTTCTTCACCTAAGTAATGGGTAGCATCCTGTTCTGATTTATCTTTTTTC  
TTCTTCTTGTGCTCAAACCCAGACTAGACATTCTCAAGATGTAAAGCTTCT  
CCCCCAGGCAGGTCCAAATAAAGAGGTTAGAATGGCTGTGAAAAGCTTCT  
GTTGTAGTTGGTGTAAAAAAGAAAAAAGAAAAAGAAAAAGAAAAAGAAA  
AAGAAAAAAGAAAAAAGAAAAAAGAAAAAGGGAAAAAAGAAAAAGAAAAG  
GAAAGGAAAAGAAAAAGAAAAAAGAAAAAGAAAAAAGAAAAAGAAAAAGAAA  
AGAAAGAAAAGAAAAAGAAAAAAGAAAAAAGAAAAAGAAAAAGAAAAAGAAA  
AAAGAAAAAAGAAAAAGACATCTAGAAATTTCAAGGAAATTCAGCTGCCTAA  
GTTCTTTAAGCATAGTGGAAAGCTTGGTTTCTGGTCATCAGAGTACAATG  
AAAATCCAAGTGACCAAGAGAATTGCTGAGACTCTCGGCCATTTGAACAT  
GTGTAAACCTTCAATTTACTGAAAAGGACTCCAATCATGCATCTGAAGAC  
CTCACTTTTATACATTGTCAAAAATGTCAGAATGATTTTCAGATGAAAGATTT  
CTATTTTTCCTCCTAGTGTATATAAAAACAAAATTAAGACTTTTTTGTCCCC  
TTTCTCATTTTCAACCCGATAAGGTTTAAAGCTTGGAAAGCAATTACATTT  
ATGCTTTTGCCATGTTTGGCTGAAAGTTTAAACTTGAAATAGAGTTGAGAT  
TGATAGCACTTATAGTCTGCCACAGTGTAATTGTTATCCAGGTTCTGGAA  
GCCAAACACAATCTGAGAATGGCACTTGTATCGTGTTTTTTAAAAGCTTG  
ATTCTGTTTTCCTCTCATTACACGAGTCCTGTGCATAAACCCATCTAGAA  
AGTTTATCAACAACATTTAATGTATAATTCACAGCTTATCCTTCCTTTTA  
ACTGCTTGGGTGGTTAAAAAGTAAGGTTGATTTGTTTCTTTCTACATTAGA  
AATGTACCTTTCAAAGAGGATTTTGTCTCAAAAAAAAAAAAAAAAAAGGATT  
TTGTCTCATTTGACATGGTGATGTATGCAGCTTATTTTGTTTGGAATTAG  
CAACTTTTCTCCAGTGGAATAAGATGACCTTTATCTTGCCATTCAGAAGA  
GATTATTAAATGAAGCCAACATTTGGCTGGCTAAAATTCACAAAATCATG  
AAATAAAGGTATACCACCTAAAGTCGGGATAATCACCAAGATATTTTTTAA  
AAAGAGAAAAAGAAAAAGAATCTTTCAGTGTGGTTGCTTCTACAGAGGAT  
GAGAGACTGAAGCAAATGGTCAGGAAGGAGGTGAGAGAGAAGGGAGACAT  
CCTTCGTTTTTTTGCAAGCCCTCACTTGGATACAGATTGCTTCTATACAAC  
ACTAGTAAAAATGAGGTGAATAATAGCTACATAAAAAATAAGATCATGGC  
ACTTCTATTAAATTAAGAATACTTTGGGACACCTGTGTTGACTTAGTTGG  
TGAAGCGTCTAACTCTCAATTTTGGCTCAGGTCATGAAGTCAAGGGGGGT  
GAGATCCAGCCCCACAATGGACCCACAGTGGGCTTGAGGCCTGCTTAAT  
ATTCTCTCTCTCCCTCTCCCCCTGCTCCTTTTACCCTCAAAAAAACCTT  
AAGAACATTTTGAATAAAATAAATTTAAAAATGAAGCTAAGCAAATTTTG  
TAGATTTATATCAATTGTACGGTAAAGTTGTCATAATATTTGAGTGAGA  
AATTCAAGGTAAAAATAGAGGTATGTATGTTATAATAATCCAACTATATA  
AAAACAAAAGCATATGCATTTACATTTCTCTGTGCACCTTTTATGCAAAA  
TAGGGATCAAATTATACAATGATGTCTCTTCTATTTCTTTATCTGGTTCT  
TTGAATCTTTGTTTTTCACTCTGCTGCATGATAATGTAAGAGGTTACTACT  
GCTCCTCTTTCCAAACCTAAAAATTTTTTTATTTTTTATTTATTTTTTTTT  
ACTTTTTTTTTTCAAACCTAAAAATTTTTTAAGCTTTATTTTTTAGTAGATGA  
AACTTTCCTTCCAATTAAGAGCTTTGGCAGGCGTGATGGGTTAAGCAGTG  
TCCCCTCGAGATGTATGTCTGCTCAGAACTTCAGAATGTAACCTCGTTTG  
AAAACAGGGTCTTGGCAGGTGTGATTAGGTTTCAGATGACTTGTACTTGAT  
TAGAACTGGTCCTCAATCCAGTGACTAATGTTTTTAGAAGAAGAAGAGAG  
GATACAGAGAGAAAGAAGACCATGTGAAGATATAGGCAGAGAACGGAGGG  
ATATAGCTACACACCAAGGAATGCCAAGAATTCCCAGGAGCTACCATAAG  
CTAGGAAAAGGCAAGGAGATTCTTTCTAGAGCCATGGACTGCCTACAC  
CTTGATTTTCAGACCTCTAGACGCTGGAAGTTGAGTGAATAAACAGCTGTT  
GTTTTAAATCACCATGTTTATGGTTCTTTGTCTTGCCGTGCTAGGAAAC  
TAATACAGAAATGCGACCATCATATCATCATCTCGACAAGAGAGGAG  
TTTCTCTGGACTTTAGAGTTGGTCTGCTAAGCCTTGGGTAACCTCAAAGG  
ACCTTCATGATTCCCCAGGGAACCACTGCCAGGAACAAGTGGAACAGT  
GCCATTGGGGTATCATTCTTTGCTTTCAGCACATCAGGTACTACTTTTCC  
TAAACCTTAACCAAATACTTTAAAGGAAAAATATTCTATTTTTTACTTACA  
AAAGTAGAGTGCTATGTATGTTTCTCAAACCATATTTTGCTAAACAATGG  
TTCCAGAAGATTTTAATAGGAAGGTGAAAATGGAAAGGGAAAAATTTTCAG

GATCCCAAACTTTGAAAATATTTTCATGATAAGTACTTCTTTTGTAGAAT  
TTTTAAAAAATATTGTATTTATTTATTTGGGAGAGAAAAGATAAAGCATG  
GGTGGGGTGGTGGGGGGAGAGCAGTGGGAAAGGGAGAGGCAGACTGCCCA  
CTGAGCCTGGGCTTCATCCCAGGACCCTAAGATCATAACCTCAGCTGAAG  
GCAGACACTTAACTGACTGAGCCACCCAGGCGCCCCCTCTTGGAGATTCTT  
AAGCACATTGAGATTCTGAAAGATCCTGAGGAAAAACCAATTTATCTCTG  
GTTAACATAAATTCCACACTTTTAGAAAAACATGGAATGGAATTTGGGTA  
AGCCCTGGAAGAATGGAATTCAGTTGGCCCCAAGAAGACTACATCGTAG  
CCTGGCCACCTATTGCCATGAAACGTGGATGTACACACCACCTCCATTTT  
CTTCTCCTAAGACCAGAAATATTACCTGCCCTGTCAATGCCACAGGGTTG  
TTAGAATAGTCAGCTTGCTATTGTTACATTTTTTCTACTTTATGTCTCTAT  
CCCTTACACTACCTCATACCTGGGATGTTGATCATACCCATATTACCTAT  
CTAAGAAAGCAGATACAAAATAACCAACATATGTAAAAGCATCTTGGAAT  
ATAAAATAAAATTTTGTATAGGTAGAAGATTGAATTTGCTACTTGATTTA  
CTTGATTTTTTCTAATTTATTGATGCTATGTTAGGAAGTTAAGAAGTTTTT  
CACTATTCCCATCCCCTATAAACTGGATGCCACTTCTGAGGTTAGCACTT  
GCATCTTGCCAGTTATGTTTATAGAATTAGGGACACTGATAGCATTTTGT  
TTGTTTGTGAGCCATCCTCCAAAGCATAGGAAAAGGGCATTATTTTCACT  
GTACCTCCATTGATGTGTCTCCATATTTCTTTTGCACCTCTGTACTTCTGT  
ATGTACTCTGTATGAGGGTGTGTTACAGATTATTTTCACTAGGGATAAC  
AGCTACATGCATATTAACCTTCAATGGAAAATGAAATATACATTTATATGT  
AACACTGGAAGTATTTGTTTTGCTGTGTGTCACACTGTCTAGCAAAAGGGAT  
CATTATACGAAGGTCTGCAATTGGCCCATAGAGAGACTCTTCATCACAT  
CTTCAACTGAATATTAACAAAAGGGCTATCTTTTTTCAAGAAAATATAGGATT  
CCTAACAAGTAATTGAAACAAAAGTGAATATTATTAAGGGTTTGACATACC  
AACAAAGTCTCAATAGATTAAATACACGCGCATTTATAATTGTGCATTT  
ATAACGGATTTAAGACGACGCATTGTCTAATTGTATTTGTTGCTTAACAG  
ATTCTTTCCAAGTCAAAGATAAGTCCCTACTTTTGAAAAATGAAGATGT  
TAGCTAAAATCTACACACACATGCAGACACTATGTGCGTATTTTTTAAAAG  
ACTAAACGATGTGGTTCAAAAGATTTTTTACACTTGAAAGACGGGATCAAT  
TGCCTACATAATTCTAATTTTCCCGTTAATTTTCAATTCTGTGGTTTACT  
TTTGTTCATTTGGAAGTAACTTTTAACAACAACAAAAAAATGCATGAG  
TATGTACCGCAGTTCTATATGGATCAAACAGACTTTTACACACACAAAAA  
CAACAGTATCCAGCTTCTAAGGTTCTTTTTTACATAATATATGCAGAGAATG  
ACTTATTACTTGTCACTTAAAAAAACATACATTTCTCTCCTGTTGGGCA  
TTTCGTGAAACCATCTCGGTAACATACTGCATGTCCATATGTAGACAATG  
TGTAATAATAGACCTTGGGTATTTTGCCATGGTTTGTAGTATATGCATTGG  
TGTTGCTGCCAAGTTTCCATTCTTTTTTACCAAAGAAGTTGCCTAAATTG  
TTAATGCAGAATATTTTAAACATAGAATGTCATCCAAACCTATTTTTTCCC  
TAATATACTTTTTTAAAGGGGAAAAGGTCAGAATATTCCAATCAATTGAC  
GTACTAGATCTAATTTATGCACCGAAGCTCTCAAACTGTGCGTCATCTG  
ACCATTTTCCATTTGTTGCTAATGAGATTAGTGATAGATTTCTTACTGAA  
TTTATAATCCATATTACAAGTAAAGAGAGAAAACAGATTATGGAAGACCAG  
TAGCTGTTGCAGTATTTTGTGTTGTGAAGGGCCAGTTATGGACACCTGGAA  
ATGGAATTGGAAGACTCTCCAGGAAAACAGAGACAAATCATTAACCCTT  
TCCATCTTGTAAGAATAAAGAGTAACTTGAGACTGGTAACCTAGAACTAT  
TTTAAGGAATATGGACTGCTTTTTTGAGGACATAGCTAGTGCCATCTTTCC  
AGAGTAGAATATTGGCCTTGCAGAAATGATGGGCAAAATGCTAAAAACGG  
ATTTTCACCACTCGCTGCTATTCCAAATGAGATGCTACGTTTCCAAAGAG  
TCTTCCATGGAAAGAAAAAGTAAGTTAGTGAAAATAAGAATTTCCATGTG  
TCTATGAAAGAACAACATGTTCTTGCCAGTAGGACTGGTAAAAGTCCCCC  
TCCTCAAAAATATTAAATAAAAATAAAAGGATAACAACAACACTTTTTTAAA  
AAGAGGAAAAATTTTTGAAAATATGTTTAAAAGGAAAAACAACCGACACCG  
AACCCCTGAAAACCTGGAATACCAGGCTTAGTTCTGTTTGAAAAATCTAA  
ACGAATCCAGGCCCTTTTTTCAGATGCATTTAAGGTTTTGTGTTTGTGTA  
TCTGTTTTTTGTTTGTGTTTGTGTTTGTGTTTCCATTTGTATCTGTTGCT  
TACAATACAATAAACATTGACAACTTTGAAAACCAACCCTACTTTTCAC  
ACAAATGGAGTATGCCACCATTTTAACATCAAAGAGTATCAGTGCTGCC

AGTCTAAGAATCCAAGGAACATTGATTCAAACATTTCTCCTTCTGCAACC  
TATTCCTGTTGGTCATTTATCACTGTGAATAGAAGGGAGGAGTATCTAAT  
GACATGTCAGCAGAAAGGCATGAATTATATAATTCCATCTTCTTTTACTC  
GGTTTTTAATAGGTTGGTAGCTTCTATTAGGTACCTGGGTAACATCAGAA  
GAGGAGTTTTCTGTAGATTTCTTGTTTTCCCTCCTCTGTAACCTACAGAG  
GGTGGGACTGGTTGGCCTCAGTGGTCCTCTCCAGCTTTAGTTTTTGTATCT  
AAGATGCTGTCTTAGAGATGAGGATCAACTCTGTAATGAAGCTGGGGTAA  
GTTCTCGCTTCTTTACACCACATCTACTCAGTTCTAATTCCAGAATTGTG  
CTCCTTTCTAAAGATTTTCAGAGATAGACTCTTTAAAGGTGACATAGCTAG  
GAGCTAAGGGAATCAAGAAAGGAATGAGATTATGAAGGTTGAATTCCTGT  
TTCGGCTATCCATACCCTTGGTAAATTACTGCATTTCTCGGAATCTCCAC  
TGTAGGGGTGGGAGTGATCATCTCATAAAGCTAGGCTCAGGAATAATGTG  
TTAACATATGCAAAGTACTTACAGAAATGCCTGATGGGAAAGTAAGTGCT  
CTATAAGTGTTTTGCTATTATTATCGTCCCCTCTTAATTAAACAACCTCAAG  
GTAGTTGCTGATGGTAAACATTTGTATTTAATACTGTTCCCTAACGTACTA  
ATCAATTTATTAGAAGTTAAACATTTACTCAAAAGTTAAAAATAAAACACT  
GGTAATGAGATTATCATAATTTGCAAATGATAGAGTTGTCTATTTTGAAA  
ACCTAAGAGGCACAAATCTTCAACGATCATAAACACTAACACATTTTTTA  
AAAGTTATCATAGCTTTTTCTGCAGAATAATAATAAATATTATTATTTGGA  
AAAAATAATGGGAACAAAATCTCACTCACAATGGGAGCAAGGTATAAAATA  
GGAATAAATGTAACAAATTTCAATTTAACAATGAAAAAATATCTACTGA  
GGAACAAGACAGAACACAATGAAAAAGATAGAAAGGCATACTCTGATTA  
TAGATTGGAACAGTTCTCTATATTTTAATATACATCAGTCATACCCT  
AAATAACCCCTATCTATTTAAGATATGTGAATTTTATTATATATAAATTAT  
GCCTTCATAAAAAATTCTCCTCATCTGTTTTCAAATTGATAGAATAATTC  
CGAAATTCACCTATGAAAAATAAATATTTGAAAAATACAACAGAGGAATA  
AATTGAGATGCATTATCCTATTAAATAAGAAATTGCAGGGCAGCCTTAGT  
GGCGTAGTGGTTTAGCGCCGCTTCAGCCCAGGGCGTGATCCTGGAGAGC  
CCGGATCGAGTCCCACGTGCGGCTCCCTGCGTGAGCCTGCTTCTCCCTC  
TACCTGTGTCTCTGCCTTGCTCTCTCTGTATTTCTCATGAATAAATAAAT  
AAGATATTTTAAATAAATAAATAAATAAATAAGAACTACTGTACATTTG  
GAACCCAAAGGGATATTTCGATTTAATGGTAAAGAATGGGTAGTTCATTAA  
TAGATCCAACATTGTAGCCAGCCTCCAAGATAGCCCCTAGATACTTCTTG  
TCTCCTGATATTCATTCATGTCCTTATTCTTCCCTTCAAACATTGAATAG  
TGCTGACCTACCCTACAATAGGATATTGTAGAAATAAATATACTTGGCTT  
TTGATGAAAGGCAGTGTGCCTTTTGTCTTATTCCCTTTTGCATCACCTGC  
TTTGGGAGAAGTCAACTACTATGTTCTGAGGGTATACAAGAAACCCCAA  
GGAAAAGTCCATATTACAAAGAACTGAGGCTTCTTGAAACAGTCAGAAGC  
TACTTACAAGCAATTTGTATGAACCATCTTGGAAGTAAATCTTCCAACCT  
CAGTTCAAGCCTGGAGATGATGATAGCTCTGGTAACATGTTGACTGTAAC  
CTCTGTAAACCTCTTTAAAGACTCCAAGCCAGAATCACTCAGGTTAGCTG  
CACTCAAATCTTGAACAATAGAACTCTGGGACAGCAAAGATTTATCAT  
TGTTTTGAGCCATTAAAGTTTTGAAGTAATTTATTATAAAGTAATAGGTAA  
CTAATACACCCAGATATATAAGGATAAATTATCATATGGCTTGCACCTTG  
ATGGGAATAGAGAGGCTATCCAATAATCATATCTTATTAAAAACGAATAT  
ACATAACACAGATGTGAATCTTGAGAAGAAATATGAAACCATCAAAGTAT  
TTAAAAATAACATATTAGGATGCATAACCCTGGATTTGAGGACTTTATTA  
TAAGCATTACATTTGAAACAAATCTCAAAAAGAATCATATTAATAGATTT  
ATAATCATAACATGTAAACTATTTGCATTAAATAGTACACAAGCAAAT  
GAGAAAAGAAACATGTATCTGGCAGAAAGGTTATTCATATACATAAACAC  
AAATTCAAAATTTAAAAAAATTAACCTTATAATGTAACATTAGATGAAAA  
AGGTATACATCTGGGCAGCCAGGTGGCTCAGCTGTTTAGTGCCGCCTTC  
AGCCCAGGGCGTGATCCTGGAGTCCCTGGGATCGAGTCCCACGTCAGGCTC  
CCTGCATGGAGCCTGCTTCTCTCTCTGCCTGTGTCTCTGCCTCTCTCTCT  
GTGTGTCTCTCATGGATAAATAATAAATCTTAAAAAAGAAAAGGAAAAG  
AAAAGAAAAGAAAAGAAAAGAAAAGAAAAGAAAAGAAAAGAAAAG  
AAAAAGGTATACATCAAACCAACTGGGGTTTATCCCAAGAATAAGTGGAT  
GATTTGCATTAGAAAATACATTTTTGTTTGTCTTACTTTTTTGTGTGTTTA

TTTTGTTTTTTCTTTTAGAAAAATACATTTTTTTTAAATTATGATCTCAAAC  
TAGGAATAGAAGCCCAATGTGGGACTTGATCCCAGGATCCTGTGAGTGTG  
ACCTCAGCCAAAGGCGCATACTTAACCTACTGAGCCACCCAGGTGCTCCA  
GCTTTTATTTTATTTTTTATTTATTTTTTTTTTAAAGATTTTCTTTTTTTTT  
TTTATTTTTGTTTATTTATGATAGTCACAGAGAGAGAGAGAGAGAAGC  
AGAGACACAGGCTGAGGGAGAAGCAGGCTCCATGCACCGGGAGCCCAACG  
TGGGATTTCGATCCCGGGTCTCCAGGATTGCGCCCTGGGCCAAAGGCAGGC  
GCCAAACCGCTGCGCCACCCAGGGATCCCCGGCGCTCCAGCTTTTAGTAG  
CTGAATTTTTTAAAGTACAGGACAGTTACAGACTCATGTGAAAAAATTCT  
AAGATCACTTTTCGGATCCAAAGTTAGGTATTCCTTTAAAACATTAATCTC  
CTCTTAGCATTCAACATCTAATTTTCTCAAGGATTTAGGAAAATGATTGT  
CCAAGGATGGACAGAAAGGTTTTAGTTCTCATCCATCTTTATAGTTCTTG  
GAATGATTACTCTCTCCAAATAATGGTCACCTATGTTTTGAGACTACTGT  
TTACATATGACAAACTTATCGTGTTCTCTTTTCCTAACACCAATTGTTGA  
AGGTAGCATATCATTTTCATTTTATAAGTTGGGTGTCATTAGCTAGTCCTG  
CAAAGAACTTCCTGAATCACAGTAATAACATGATTCATGCCAGAGAGAGT  
GTATTTTATGGATGTGTTGGGAAATTTTAAAGTTTGAAAAATCAATGATT  
GTTGAAATGAAGAGCCATGTTGATAAAAATGCTGGCATGACTTGTGTTTG  
TTTTTCTAAAAAGCTCTGGTAGTCACAGATCACAAATTTAAATATCATA  
TATCTTTTAAATGCTAAATGAAAGAAGCCTGATGCATTTTGGGAAGTAA  
TTCTGGAAGTGTAAGTACCTTTTAAAAATAAATTTAAACACATTTTACTT  
CTTGGGACTATTTCTCATGTCTATAAATAGACAATGAAAATTGGACTC  
CCCTCAGGCCAATAAATAAAAATAAATCTTTTAGGATTCTTTAGCTTTTG  
AATGGGATGGATTAAATGGAACCTATCTGGGTAAGACATAAAAGTCAAAA  
TTTGGTTAATATATGTTTCAGATTTTTTTTTTTTCACTTTAATCAGGCTTG  
ATGTTTCCTGCTTCCAGGACAAGCATCCAACTCTAAAAATCCAGGGAGA  
GACTATTTAGCAGAATGTCTGGCCTCTTCCGTAAATGAAAAGACAGGTAA  
TATTCATAAAAGAACACTTCTATGAAATTTCCATCATCGAGTTCCAGCTA  
AAGCAGCTTAGATGAGTGTCTATTAGTCTGCATTTTCCCCATGGTGGTA  
AGTGAGAATGGGGTGGCCCCTGGAACCTATTCAGGACAAATAGTTTTCCTC  
TCCTCTCCATTAGCTGCCAGTTCTTTCCCTCCATCAGGATTCCATCAACA  
TATTTTCAACAAAACATGACGTTAAAGGCGTGATTGTGATTCCCCTCATT  
CTGGTCTATAATCTCATTTCGACTTTCCTCAACACAGTACTCTGAGGTTTG  
TTTTTATTCATTTGAACATTTGTGACAATGTGTCTTAAAAATTGTCTTG  
GCATTTTCTTTCCAAGCCTTAAACCTTATCAGGTTGAAATGAAAAGGGA  
TCAAAAAGTCTTTAATTTTGTTTTATATGCACTAGGAGGAAAATAGATGG  
TTTCACTGGTAAGAACAGATGCTTCACTGTTTTCTGACTATCGAGGCAAC  
TCTTTGTTTTGTGTTCTAAATAGTAAAGGTAGAAAAAAATCCTTACATAT  
ATCAGGCTAATATTTATTTTAAAGGAAAGTGCTGTTTTGGGGAACGATGC  
CTGTTTACATCAGTCGGAGATGGTATTAGTACAGGCACTGTGTGTTTCTC  
AAACACGAGATACACTCTTGTCTAGGGGTACAAAGGCTTCATCATAAAAC  
CTTGGTTAGAACTGGACAATTGCACAGCTTTGCTTTTGTCTGACTCCATT  
CTAATCTGTTGACTTTTAAAATTGAATGAGAGACATTGTTTCCTGAGAGG  
AGGGCATGAAAGCCTCAGAACACAATGAGGAGATAGCATGACTCACCTTG  
GAGTACCTGCCTTCCAGGTGCTCGCTGCCTGATTATTCTTATTCCAGGTG  
AAGAGTTCAACTGGTAGGGGCCCTGATTCCCTAAAAGTAATAATAGATGAA  
GTTCAGAGAAAAGAAATCCTACAAAGGAAAGGATAAGTGAGTTAGGAAAA  
GAAAAAAAAAAAAAAAAAGAAAAAGAAATGGAATTTGAAAGAATAAAAT  
GAATAAGGAAAAGTTTACATTCAAACCTAGAGAATTGTGCAGTGCCCATTA  
AAAGAGGATAGTAAGATAACCCAAGGAGTGGATTGGTTATTTTGATTGTA  
TCTTCTAAAACCTCTTAGGCAGAGAGTTATTTTTGAAGATAATAATCCAAA  
TCTCACAGGACCATTACTCTGGGGGCGGGGTGGGGTGAGGTGCTTTGGC  
ATTTCAATTAAGCTTAAATACTGTTGTGAATCGAATTTGGGGAGATGAAA  
TGGAAGCTTAAAGGAGAAAGCCAGGCCTTAGTCAAGCATGTGAAACAGGT  
GATGTGTCTCTTCAGAACCCAGCTAGCAAATGCTGAAGATTTACTGCTGG  
TGGGTCCTCTCTTGGTCTGTCTCCCTCTTCCCCTAAACTCCTAACCCA  
GTTTGGGGTCTGTTAGTTACATTGCCTAGTCTGAGTCTCTTGCTGCCAC  
CAGTGTTGAGGTGAGAGATAACCATTTCCCTAAGGCATCCCATTTGTCCAA

CGGCATGTAAATCTTCAGACTTTATGCCGGTCACTCTGTGCTTCCCAGTT  
GCAAACCACCCATAGGCAACACATCTCATGCATGGTACACATGCTGCTTC  
TTTCAGTGTTAGTATTTTTGGATATAATATATAGTCTTTGAGGTTTAGATT  
TTCAAGGTAGGTATCTCAGACTCAGATAAAGTAAAGGAAGCATTTAGGTT  
TTTTAAGATAAAAAGCTCCTTGTTTGGGCACTCATGCCAACGAATTAGGC  
AGCTATCTACAGAAAGGAAATAAACTCAAGTGGTTGAAAGTAGGGTTTCC  
ATAGCGAATGTTCTGCATTGGTCTGCTTCACAACCTTTGTGGCTGACAGA  
TTTCAGCCAGGTTTCCTTAACTTCATCTGTAAAATAGAAATAATTGCAGCT  
ACTTCATGGACTATTGTGAGTCTACAATTGAGGTAATGATACAGATAAAA  
TACCTGCTAGGGTTTCCAGCATGCGTTGAGCATTCACTCTGGCATGTAGT  
AAGCTACTAATATTTGTCTGTGGTGGCAGTGGTTACCATACTCCTGATGA  
GAAAGAGTGGTGCTGAGTGGAGAGACCTGTTGATAGGTTTCATGGCAAGGA  
GGAAGATGAAACCACGCGTATCAGCAGCGCTCTGGCAGGGAACGAAAC  
ACAATTAATTCAAATGGTTAATTGGAGAGAGTTCAATGAAGGGAATATTT  
GCTGAGGTAGGGCAGGATTAACAGAATCATAAAGGGATGGCACCGTGCCC  
AGAACTACCTTCTGAGGCTCACCAGTCCAGACATAAAATCCTCTAAACCTG  
GAAGAGAGAAGGAGAAAAATTGGGTACTAGAACCCAGAGAGAGTTGCAGA  
TGTTGACGAGGAGTCACCCCTGCAAAAGCCATAGTGGAAGGTGACAGCCC  
CACAGAAAGTGACAGAAGGCTACATGCCCACTTTCTGTGCCTCTGATGA  
TAACTCTCACTGGAAGAGCACAGCCAGAGGCCAGAAGAAAGATCCTAGGC  
TTTGTAGTTTCTACAGTGAAGCTCCCTTGATGGAAGCAAGCCTGAGAAT  
AAATCTGGAAGGGCAGAGAGTAATGCTAGTGGACCAGAACACCAGATTTA  
CAATTTATTTTTTCATGAACTTCGATTCTTGCCAGTATTATGAAAGTAGGA  
TTTAGCACTTGTTATTTAAAGAACCCTCTAAAGTTGCTTTGTGGGGCCCTG  
GAGCTTTGTGGATTGGAGCTTGGATCTTTGACTTACAGCTATATCGTAAT  
ACTGATATCTCAGAATCCCTGGGAGCATAACCTTGAAATACTTAGATTCT  
GCTTTTAAACAGTAAAAAGCCCAGTTTTCTGTCAAACAGGACATCACTAA  
TTTAGATATAGTTTCTAACAAGCAGAGTTTCTGTCAATAGGTTAATTTAA  
TTAAATTATCAAATTTGAAAGTTTATATCAATAAAGTGAAAACCAGATAA  
AATACATAAATCCAATTTATTTCTTGGACATGTGGACATTGTTTGAAGTG  
TGGTTCCCGTAGAATAAGCCACTACTATGATTCCAAGACTGTACCCCTT  
TCAAACAAGCTCTCAATTCTGCTTATTGTGTTATTTGAAAATAAAGGGG  
GGATTACAAAATAAATTTGGAGGTTTTGCTACTAACTGTATGATGAATAT  
TGTGCAAGCATTTTTTTTTTTTTTGTGCAAGCATTTTTAATCCACTTTGGC  
TGCTTGGACTTTCACGTTGGAGTCTAACGGTAGAATTAATTTGGGATAAA  
TGCTGACTAGTGTTTAACATTTGCATTTTAAAGTTGTCTCTTCCTGAATCA  
TTATAAATTATTGCAAACCTGACTTAAATGTTAAAGCTAGTATATTCATT  
ACACTGAACAACCTCATTAAGAAGATTCCAAGATATTGGAAGCCTTTTTTG  
CTCCAAAATTTCTTGAATGAGATAGCATGTCTGAATGATAAACATCTGG  
AGGACGGGATCTTTTTAGGTAGCACAGACCTCTGCATATAGTACTTCTAA  
AATAATTGTCAGCTCAGTGGACTTTAGGGTAGATGTAGAATAAAAGTGAA  
ATTCACAACCTATTAATACTAGTAAATATTTGCTTTGTAATAGAAGTAATA  
TACTTCTAACCATGCATACATATCTATAGTGGTTAAGTATGTCAAAGTCA  
AAGTATGGTTAAATTCACATGTCAAATATTCCAAATAACATGTATAACGT  
CAACATCCAAAACCTGTCATTCAAACCATGTCCCATTAAAAGCAAAAATA  
AACAGTTCAAAGAGAAGATCAGGAAGTATTTGACATAATGATTGTATCAT  
AATAAAATATTTATAGTACTCTCTTTCATCCAGGAACTATTTGATACCA  
TCATGGAGTGAATAAAGTTGGAAGCAAGGAAAGAGTATTGACGTCAACAC  
TTATTATATTAGTGAAACAAATAGTGAGAGAATGTTTAGAGAATCCCGTG  
ACAATGAAACAAGTGAATATTCACCTTTGAACTAACACATCAGGAACATTT  
AGATGCATTTTAAAAAAGTGGATTGTGATAATAGGAAATCAGGCTATTA  
GCTTTATGTTTTTATTGGAAGTAATCTTAAATGTTATTGCTTAATTTA  
AAAAAAGTTATAAATTCATAATTTTTTAACTACTCTCCACCCATAATACT  
GCTTCTCTTTAGCAATATCACCGATATTAATCCAATATTATTAGGTCTTT  
TATTTCACTTGTCCATTTATAGGTGTGTGATGGAGGCCAACACAAACATT  
AACAGAAAGAACAATGAAAAAGATGCTAGGAGTCAAAGAAAACCTCTGCCC  
TCCTTATTTTTTGGAGCTAGCAAAGGCAAAGAAAAAGTACTAACTCAATTAG  
TTAAAAACAGAGAGAACAGACAAGGAATTCAGCAATATGTAACCTCTAAGT

AGATATCATCAATATCAAGATTATCTCATTTAATTCCAATCAGTGTCCCA  
GTTCTTATGACATTTCCCTTCTGGGAAATGGCAGTTATCTTGGCATTGC  
AGCTGTCAGGAGCGCATACTGTTTTTTACTCTCTAGTTTCTTGCTTTCAG  
GAACTGGATGAAAAAGTCAGTACTCCAAAAGAGCCAAGGGCTGGAAAGCC  
ATCTTTCTTGTGTCGATCTTCCCTATCTAGATGCAACATGTACTATAAGTGA  
TAAAAATTTGTTTTATCATGATAGATTCTAAATTCTTTTAAATTCCCCTGG  
ACTGTCATGAAAAACAGAAATATTCTCCAAGACCGAAGATTTCTAATCCT  
TGGCGGTTAGGTACAGGACATATCTTACAGAAAGCAAGAGACCTGCTTAT  
GTTTAATGTCTGGATCCCACCATTTGAAATGCACGCCTTTGGGTTATTAA  
GGAAATACATGGATTTTCCAGCTTCTTCCCCTCCTCCCCTCAGTGAATGT  
GCCTTTTAGGAGAAGTTTCCACAAAACCAAATAGATTTTGCTAAGACATG  
AGAGGAGAGTAAGGCATAATCCTGAATGAGCCAGGCTAGAGAGGGACACA  
CAGTTCGAGGTTTCTGGGTAGCAAAAATGACAACTTAAGAATCCCAGTAA  
CAAAGGGGAAAGAAGAGATCTCTTAAGTGAAAGAGTCAGTGATAAAATCT  
CAAGGTTAAAAATAATTTTAAAAGGGTATACTGTGAGAGAGGACTTAAGA  
ACAGAAATTATGGGCAGCCCAGGTGGCTCAGAGGTTTAGCACCACCTTCA  
GCCCAGCATGTGATCCTGGAGTCCCTGAGATCGAGTCCCACGTCAGGCTTC  
CTGCATGGAGCCTGCTTCTCCCTCTGCCTGGGTCTCTGTCTCTCTCTC  
TCTGTGTGTCTCTTATGAATAAAATAAAATCTTAAAAAAGAACAGA  
AATTATACAAGCATAACTTCTATTTGTTGAATTAAGCAACATGCAGT  
AGGTTTCCGGAAGAATGCTACAGTAGTGATGTAGGGTTTTTCATCTCCTTG  
AATCTCTTTCTCCAATCCAAGTACTAACCAGGCCTGAATCCCTTTCTATA  
AATAAGCAGAGCAGCAATGGTAGCAAGACTACTAAGTTATTGAGAAAATG  
ATATCTGAGCAAAAACATAAAGAACATGAAGGAATTAGTTACATGAGTAT  
CAGAGAAAAGTGTAATCCAGGCAGAGAAAAGACACTTCCAGGAGGCTCTA  
TGGCTGGAGGGAGCCTTGTGTGTTCAAGGACGAGCTCGGGGAACAGGAAC  
AGGGTGGCTAGTGCAGAGGAAATCAGGAGTGGCAGGAGAGGAAGTCAAAG  
CTGAGGTGGGGAGGTCACTCATCCAGGATTTACCTTCTACTCTGCATGA  
TGTGAAGATTCAATTGGAAGGTTTTAAGCACTGGAGTGGTGAACATGCTT  
AATAGCTCCCTCCCTCTGCCATAATAAGACATATTCGTAGGAACTCTTCC  
CAAAAAAGCTAAGAAAAAGGACATAGAAAAAGGATGGGATGGGAGTACCT  
GGGTGCTCAGTGGTTGAGCATCTGCTTTTGGCTCAGGTCTTGATCCCAA  
GGTCTGGGATCGAGTTCCACATCAGGTTCCCCACAGGGAGCCTGCTTCT  
CCCTCTGCCTATGTCTCTGCCTCTCTGTGTCTCTCATGAATAAATAAATA  
AAATCTTAAAAAGGAAAAAAGAAAAAGGATGGGATAATACATGCTAAAT  
TCTTTACAGTAGGACTTAAGGGTACCGAAAAAGGTAAATTCATGTTTTTT  
TCCTTCTTTCTACATCTCTGATTGATTTATTTTACTTCTTATGAGAATGT  
ATTACTTTTGTTTTATATATATATATAACATATATGTTATATATATATAT  
GTTATATATATATATTATATATATAAGATTTTGTATCCTATCCCAAGTCA  
GTCATCTTATTCTTCAACAGCTTTTGTCTTAAAGCAAGTTTTCTCATTG  
TAGTTTGAAATATTTTCGTATAACTTCTCTCCAACCTGCTCCTAGTTTTAA  
TTGTTAGGAGGTAAAGAGACTGGGCTTAATAATTCTCCAAGACATCTCAT  
CAGCTTGCTGCAGAGAGGTGTTGGAGAAGCCTATAGAACATTCTACAAAT  
TTCACAACTTAACCAAAGGCTGGCCCCCATAGTGGGCAGAAGTAAACAA  
GACAGTAAGAGGAGGAAATAAGCGATGGAGGAAGTGTGGTGGGAACACGC  
ACTTCTCTGGGTTATAAAAAAGAACTTGGCATCAAACGTTGGGCAATCTT  
CTAAAAATCATAGGTAAGTGACCCAGGAAAACGATTGAGAAATGTGAGGTC  
CTAGCCTGCTGCGGAAGGCAGCACC AATGAAGAACGATTGAGAAATACAG  
TCTGGAGAGGACTTAACACCTCTTATTGGTTTCAAAGTGGACGGCTTCT  
GTTACCAGAATTATTTTAGAAATGTTATCTCATATTTTCCATGCTTGCA  
TTATTTCTTTCCCTTTCTAATTTTACACCTGACTGCCCTGAGTAGGGGTGT  
GTGAGGATGGGGAGGGGTCAGAGGAGGAAATGGTAGTTTAAAAACACA  
AAGGAATACAAATCTCTTAGACTCAAGTATAAAAAGCCAACGTTTCTCTT  
CCCACGAAATCATTCTGCTGCAATTAAACCAACTTACGGGACTCTCTCCA  
CAATTAGAAAAGCACTTAATAGATCGCAAACGTTATAGAAGGGTTGGTT  
AATTAATAAATAAGGGAATGTAATATTCATCAATAAGTACAAGACTCATTC  
ATCCTGCTTGCTGAGAAGAACC TAGGAGGCGAGACATGGAGAAGAAAACA  
TGAGACTGCCTTTTCCCTATAAAGCCTGTTTCTCTTAAATGAGAGGCTGT

GCCCCTCACCGAACCGAAGGTATCCTATCACCTTAAGGAATGCTCTTTAT  
AATAAAAATTGTGATTAAGAAAGCATTTATTTTCCAGCTAATATAAGGCA  
TGGGACTAAAGGTACATAGACTAGAAAATGTTTTCTGTTCTACAGAAGT  
CTGTCATATCAGAACACATGTAAACATAAAACATGCATTACCAAATCGAC  
AAGGGCCAACCAAGTCCAGTAAAGGCTCAAAGGCTGGTGCAAAGCAGAGCG  
ATCAGAACACAATGCCACTGAGATAAGCACCGTAGGTAGAGAGAGACCGT  
GGAAGTTAAAAACAAGTTCATTTCTCAAGAAGGACAACCTCTTTGCTTATC  
AAAAAGTCACTTTTTTTTTCCCCCAAGCAAACCTGAAACCCAGAAGAAACA  
CAAGCAAAAAGTCTGATACGATATTTTCAAGCAAGTATTATAAACACTATAA  
GAATACTATAATATAATAATACTATAATATAATAATATATAGAAGGTATA  
TAATATAATAATACTATCATATACTAATAATAACCACAATTTTTGGTTAA  
GCTCTTTCTAATTTCCAGGAAAAAGGCTACCTATCCGATGTGCTTAAGTG  
AATTAGTTCACCTCAACAAACCAATTTAATTTGTGAGAGATTACAATGCCT  
GAAGAGGAGCTGGTCCCTCCAACAAAGTCGGGTTGCCTCTACCACTCAAGC  
TTTGCCATCAGCAGTTTCCAAACTGGCTGTGCACATCTCTGTGGACATAT  
AAAATGACCTGCTGGGGTATAAGCAGAAAATCTGAAAGAGGTTTCATTTCA  
ATTTTTGTGTTTTGTTCTTTAAAAATTGTTTTTGTATAGGATATACAATA  
TGAATAATATAGTAAGCTTATATAGTATATAAATACGAAAATTTACATAT  
ACTGTGGGTTGTGCTTAAAAATATGTAATGATAGGAATGTGCAATCTAAAA  
AGTTTGGAAGAAGTCTCAAACTATTAAGCCATATGGTCCCCAGATTCA  
GACCAACCAAAAAATATATATATATAAATTTCTTTCAAAAATTTCTTTCA  
GCACATTTTTATCAATTTTGTTAAGCCAAATAAAAAATCTCCAAGTGAAAT  
TCAATTCTATTGCACACTCTAGAAAAATTGTTAGAAAAATCTGCTATTGTA  
GTAGCTCAAGACCGTAGATTATAGATTGCGAATTGTAGGGTAGGGTTGCA  
ATTTATAAGGGAAAAGGGACTTCTGGAGGCAAAATAATATTGTCTAGACA  
TTTGAAC TGATACAGATCAAGATACTGTAAAAACCCGTTATAAATAGCAA  
ATATTAAATCTTTAAAAATAGTCCATTTGGGTCCAGTTAATATTTATTTCT  
CTTCATTATAACATGATACATCAGGCATTAGGCAAAATGAGAAGACTTCT  
TTGTAATGAAATGTCCCTTGCTTAGTATTTTCTGTTTAAAGGAATTGA  
TTTGAACAATGCATATAAGAAAGCTATCTATCACCATGGCTAAATATATA  
AATGAAAAGGCACAATATTAATAGTTTTTATTATGATACTGTAATAGTTT  
TCCATTACTGGTGTAACAGATCACCAAAAATTTAGTGGTTCAAAACAGTA  
TAAATTTGATAATCTTATGTTTCTGGAGATCAGAAGTCCTAAATGGGCTT  
TATAGGCTAACATCAAGGTAGCTGCAAGCTGCATTCTTCTAGAGACTCT  
AGGGGAGAATATGTTTCTTAACTCTTCCAGCTTCTAGAAGTCCCCTGCA  
TTTCTTGGTTCATGATCCATAGCCAAAGGAAATCACTTCAATCTGCTTCT  
GTCACCATATCACCTTCTCTTACTCTGACTCTAGAACCTGCCTCTTACAT  
CCAGGTCATCTGGATAATCTAGGATAATCATCCTGTCTCAAGATCCTGAC  
TTAATCCCATCTGCAAAGTTCCTTTTCTTGTAAAGGTAATATATTGCCA  
GTTCCAGAGAATAGGGTATGGCATCCTCAGGAAGCCCTATTAGCTGCAC  
AGTTTGCCACCTGGTTCCCAAAGATTACGTCCATTTACACGCACAATA  
TATTCATCTCACCACAGGATCCCCCAACTGTCAACCCATTAGAGCATCA  
GCTCAAATCCCAAATCTCATCTAAGTCTTATCAGCTCCAAAGTCCCAAAT  
CTCATCATCTAAATCATCTAAATTAGGCATAGATGAGGCTCTGGGTCTAA  
TCCATCATGGAGCAAAATCCCTCTCCATCTGTTGGGCCTGTGAAAGTAAA  
AAATAAGTCATCTGCTCCCAAGATACACTGGTGAGACTGGTATAGGACAA  
GAGTTGATAGTAGTAGAAATCCCTGATCCAAAGGGATAAAACAGAAGGAA  
AGACATAATCACAGGTCCCAAGGAATTTACAAATTCAGCAGGGCAAATT  
AGAATTCAAGGCTCATGAATTGAGTATCTATCCTCTGGACCTGTGGCTCT  
GCCCTCAGACTTGTCCCTCTGTTTCTTGAAGGATAGTGGTAAGATGAAA  
TTCATCATTTTCGTACACCTAATATCTTCTAAGAGGTAAGTGGTTTCATCAG  
CCTGTTTCTGACTGTAGGATTTGGGGGATAAGATAGCCTTCTTTATTT  
TAACTTGTCAATTGTGCTTTTGTAGTCCAACTTATGGTGTTCATTGATA  
TAACATTCTAAAAGCCTTGTGGGTCTCCCATTTGTGTCTGGGGAATTTAC  
TTCATTACACATGAGGCTCCTTCACAAATCTTCCCTGGATAAACATATCT  
CTATTCTGGCCTCTACTGAGCTGTCTGATGAAATTCATCATTCGTACAC  
CTAATATCTTCTAAGAGCCTTCTATGTGATTGAACATTCTGACCTTTTGG  
TCCCTGCCAGGCACCAACAGAACGTCTATCCAGCCACATCCTTGGCTTTCT

TTCCAGAGCACTATGCTGGCCATGAATCTCTTAATTTTAACATATTCTGA  
AATCTGGATAAGCTAAGAATTTCCCAAGCCAGTAAGTTCTGGTTCCTTTG  
GGCTTTATGGTTCCTTTTTTCACTTTTTTCTTTCCTCTCATATTTTACTA  
TAAGCAGCAAGAAGAAATCAGGTTGCACCTTCAACGCTTTGCTTGGAAAT  
TTCTCAGATAAATATACAAATTCATTCTTTGCAAATCTTGCTTTCTACC  
TCATCTCAGGACAAAATCCAGCTAAGTCTTCTGTTACCAGATAACAGGGG  
TCTTCTTCCCTCCAGTTTCCAAAAATTTTGTCTCATTGCCTTCTGAACC  
TGAATAGCAATGATTTAACACATGTATTTCTACTAAAATTATTCCTGTGA  
TGGGGTAGTTATTGTCTAGAAAGAGATAGGTTTTCTCTATTGCTCTTCTA  
ATTTCTTCTGAGTGTTCCACCAGCAGTATCTTGAATGCCCATATTTTTGC  
CAATGATCTGTTTATGTTGATCTTAGAATTTTCTAAAAATAACAGAAGTTT  
GTTTTTTTTGTATTTTCTACTATGCTCTTCCCTATTCTTCCAGCTGTCTG  
CCTCTTACCCAATCTGAAAGTGATTTCTACATTTTTAGGTATTTCTTACA  
TACAGCCTCACCCCACTTCCAGGTCAGTACATAGCATTTGTTGAATCAT  
GGCTACCATCTTCCAGGCACTCCGTAAACATCTTAATTAATTATCTCAAC  
AACTATCCAAGGGAAATATTATACCTATTTTTACAAATGTGGAAGACCATT  
TAAGATTATTGAAAAGTTTAGTCTTTGTAGGTCAGCAACATAGATTCAA  
ATTCTGGTTTCATCACTCTTTTGTGTAATATTTTTTGGGAAAATCACTTA  
ATCTCTTAAAACTTTGCTTCAATTTCCCTTAAAGTTAACAGTGTATATAC  
AACTTACCATGCAAAAAGATTTTTTCTTTCTTTCTTTCTTTCTTTCTTTCT  
TTTCTCTTTCTTTCTTTCTTTCTTTCTTTCTTTCTTTCTTTCTTTCTTTCT  
TTTCTTTCTTTCTTTCTTTTTTCTTCTTCTTTCTTTCTTTCTTTCTTTCT  
TTTCTTTTTCTTTTTCTTATTTCTCTTTTTTCTTTTTTGTAAAGGCTTA  
TATAACATATGTAATATGCTTGCTTTGTGGGTATGTAATAGGAATTATTT  
TTCTCGACATTTTTGTGTAATTTTGCTACATATGGTATTAATCATTGG  
AAGAGGATATCACCAGAGGAGAGGAGATATATGTGATAAGGATAACTGGT  
AAATCAGAATAAAATAGACACATTCAGAGAAAACAAGCTGTTATAGATGAT  
GAAGTTTTCTGAAAGTCCTTTGGTGATTGAAACACCTTAGGGGGGCACTT  
GACGGGATGAGCACTGGGTGTTATTTCTATATGTTGGCAAATTGAACACCA  
ATAAAAAATAAATTTATTAAAAAAAAGAAACACCTTTTATACTCCATCCA  
TTGCTTTTCTTGAGGATACTTAGTAGTTAAGATATCAGACGTCTTGGGGC  
TCCTGGGTGGCTCAGTCAGTTGAGGGTCTGACTCTTGGTTTCGGCTCAGG  
TCATGATCTCAGTTAGCCCCGCGTTGGGCTCCATGCTGAGCCCAGAGTCT  
GTGTGAAGATTTCTCTTCTCTCTCTTTGTCCCTCCTCTCTCTCTCTCAC  
TCTCTCTCTCACTCTCTCTCTTGTCTCTCCCCAAAATAAATAAGTAGAT  
CTTTAAAAAAGATATCAGATCTCATGAATTGATTAAAGAAAAGATGAAT  
TCAGGAAATTTTTTATCTGATGAAAACTCAGACATAGAGGAGCTCTGTAT  
TTCTGTGAAAATGTATTAATGCATAAGTGCCAATATCAGCTTGAAGAAAA  
AGAAAGTGTTATGATAATCTTTGGTTCAAATCTATCTTCTAATTATATTA  
TTTAAGGAGAAAATACAATTGTTGGATTGTCCATTTTGGGGATTTAAAT  
GTTTAATAAAAAAAGATTGCGCATTAAAGTAAACAGAAAAAAGAAAGA  
AGAAGAAGCCCCCTGGGACTATATTTATTACTTGCTTTCTCTATAAAGGAA  
GGATTGTTTAAACAGTCAATTTTAACATAAACCAACTCAGGAGTCATCT  
CAGAACTACCCCTTGGAACCTGTCTGAAAATAGAAGTTTATCACTTGTC  
TTTTTAAAGGATATCCAAC TAGGAAAAACATTTGTAATCCACAGTTTGG  
AATCCTTATAGCATAATTCCTGACTATTGTTTTTCAAACAGATTTTATG  
GCTGGCAGCGAGTGAGGCAGTTAATTTATATATTTATGTATAAATATGTA  
CTGTGCTAGTGACCTCAAATAATTGTTATCTTGGTAGATCTAAGATAAGA  
ATTACTAATGCTATTATTTTTTCAAAGACTTGATTTTTTAGGGAGTTTT  
AGATTTACGACAAAACAGAGAGAAAGACACAAAGATTACAAATATCCTTT  
GCCCCACACAGCCTTCCCCATTATGAACATCACTTACCAAATAGGACA  
TTTTTTTTACCAAGGACAAACCTACACTTGACACATTACAATTACCCAA  
AGTCTGTAGTTTAACTTAGGGTCACTCGTGGTGGTGTACGTTTTATGGG  
TTTTGGGAAAAATAACATCTATCCATCATTATAATACTATACAGAGTATTT  
TCACTGCTCTAGAAATTCCTTGCTCTGTCTTTTTCATCCCTCCCTCCAC  
TCTCACCCAGCAACCATGGTTTTATTTTCTTTAATTTCAAGATTTTATT  
TATTCATTTCATGAGAGACCCAGAGAGAGAGGCAGAGACACAGGCAGAGGG  
AAAAACAGGCTCCCTGCCGGGAGCCTGATGTGGAGCTTGATCCCAGGACC

CTGCAATCACAACCTGAGCCAAAGGCAGATGCTCAATCACTGAGCCACCC  
AGGTGCCCCAACCATGGGTTTTCTTGTTCTCTCTACAGTTTTGTCTTTTC  
CAGAGCATTCTACAGTTAAAATCATAACAGCATGCAGCCTTCTCAGATTGG  
CTCCATTCACTTATGTATTTAAAGTTTTTCCATATCTTTTCATGGCTTCA  
TAGCTCATTTGCTTTTAGCACTGAATAATATTCTATTCTCTGAATGTATC  
ACTGTTGATGTATTGCTCACCTATTGAAGAATGCATTTATTGCTTCCAA  
GTTTGGGCAACTATGAATAAAGCTACTACAGATATCCATGTAAAAGGTTT  
TTGTGCACATAAGTTTTCAACTCCTTTGGGTAAATACCAGGAAGTGGGAT  
TGTTGGATCATATGGTAAGAGCATGATTGTTTTGTAAGAAATCTCTGAAG  
TGTTTTCAAAGTGTCTGAACTGTTTTTATACTTTTACCAGCAAAGCATGA  
GAGTTCCTGTTGCTTCACATCCTCATAGCATTTGATACTATCAGCATTCT  
GGGTTTTGACCATTCCAATAGGTGTGTAGCCATATGTCATTATTGTTTTA  
ATCAGCATTCTCAGATGACATAGGATGTGGAACATATTCTCATATGCCT  
CTTTGCCATCTGTATGTCTTCTTTGGTGAGATGTCTGTAAAGGTCTTTGG  
CTCATTTCTTAATCAGGTTTTTTTATTTTCTTACTGTTGAGTTTTAAGAAT  
TATTTGTATATTTTGGATAAAAAGTCCTTTATCCCATGTGTCTTTTGAAAA  
TATTTCCCTCTGTGGCTTATCTTCTAATCTCCTGATGGTGCCATTTGCAGA  
GCAGAAGTTTTTAATTTTAGTAGATTCCAGGTATTGATTATTTATTTTCG  
TGGATTGTATCTTTGGTATTGTATCTAAAAGGACATCACCATCCCCAAC  
TCAACTAGGTTTTCTCCTCTGTTATCTTCTGGGAGATTTATAGGGTTTGT  
TTGTTTGCTTGTTTTAGCTTTAGGTCTATGACCCATTTTGAGTTCATTTT  
TGTGAAGGATGTAAGGTGTGTGTCCACACTTATTTGTTCCGCATGTAGAA  
TCAAAGTCTGCTTTCTTTTCATCTCTACCCATTCTTGAAGCTCTCTCCA  
TTTCTCATTAATAAGGATGCCATCCTCTAAATCAGTTATTTTTTCTTGTT  
GGGCACCATGGGCTCTTCAGGAAATACTGCTTTGCTGAACTTCACCTGGT  
GGTCTAGCTTCATTTTTTTCTGTCTGCCTAACTGGATGAAAACCTCATC  
CTGGATATTAATCAGGGTAACTACATCTACATATCAGGTTAAGGCAGAAG  
CTATTTCTTGTAAGTCAATTTTTTCTGCAAATTCCAATTTTCAGACATA  
GAAAAATAATGATCTCCTATTTTCCAGAAAGGCACAAGATTTGCCTCAGC  
CAATCACTGTTTACCTCTTTTTCTTCTCCTCAGGGCACTTTCTATTTCTTT  
CAGCAAAGTTAGATTCCCATGGTGCTTTGGGGGTCTACTGTTAAATTGCT  
CTTCTATTAAGTAATATAAAACATGAGCATACCTCAACAGTGGAAAAAG  
AGTCTTTTATGCTTGTTGTTTCAAGATGTCTAAAGTTGTAGTATCCACA  
ATAGCCAAATTATGGAAAGAGCGCAAATGTCCATTGAGATGAATGGATAA  
AGAAGATATAAAGAAGATGTGCAATAGCCAACTATGGAAGGAGCCTCGG  
TGTCCATCGAAAGATGAGTGGATAAAGAAGATGTGGTCTATGTATACAAT  
GGAATATTACTCAGCCATTAGAAATGACAAATACCCACCATTGCTTCGA  
TGTGGATGGAAGTGGAGGGTATTATGCTGAGTAAAATAAGTCAATCTGAA  
AAGGACAAACATTATATGGTCTCATTCAATTTGGGGAATATAAAAATTAGT  
GAAAGGGAATAAAGGGAAGGAGAGAAAATGAGTGAATAATCAGTGAGG  
GTGATAAAACATGAGAGACACCTAACTCTGGGAAATGAACAAGGCATAGT  
GGAAAGGGAGGTAGGCAGGGGTTGGGGTGACTGGGTGATGGGCACTGAG  
GGGGGCACTTGGCAGGATGAGCACTGGGTGTTATGCTAAATGTTGGCAAA  
TTGAACTCCAAAAAAAAAAAAAAAAAAGATGTGGCACATATACACAATGGA  
ATATTATTAGCCATCAAAAAGAATGAAATCTTGCAATTTGCAATGATGT  
GGTTGGAGCTAGAATGTATTAATATTAAGCAAAACAAGTCAGTTAAAGAA  
TGACAAATACCATATGATTTCACTCATATGTGCAATTTAAGAAACAAAAC  
AGATCAACATAAGGAAAAGGGGAAAAATAGGGAGGCAAACCATAAAAGAC  
TCTTAACATATAGAGAAATAACAGGATTGATGGAGGGAGGGGCATGGGAT  
GGGATTAAATGGGTGATGGTCATTAAAGAGGGGACTTACTGTGATGAACA  
CTGGGTGTTACATATAAGTGACGAGTTGCTAAATTCTACTCCTGAAACCA  
AGATTACACTATATGTTAACTAAATAGAATTTAAATAAAAACTTGAAGAC  
ACCTGGGTGGCTCAGTGGTTGAGTGCCTGCCTTTGGCTCAGGTTATAATC  
CCAGGGTCCCTGGGGTTGAGTCCCTCATCAGGCTCCCCACAGGGATCCTGC  
TTCTCCCTCAACCTATATCTCTGCCTATATCTCTCCCTCTCTCTCTCT  
CTCTGTGTCTCTCATGAAGAAATAAATAAAAAATATTGTGGACGTCTGGGT  
GGCTCAGCAGTGAATGTCTAGCTTTGGCTCAGGACATGATCCCGGATCTA  
GGATCAAGTCCTGCATCTGGCTTCCTGTGGGGAGCCTGCTTCTCCTTCTG

CCTATGTCTCTGCCTCTCTCTCTATCTCTCTGTGTGTGTCTCTCATGAAT  
AAATAAATAAATCTTTAAAAAGAAAGTATTAAAAATAAATAAAAACTTGA  
AATAAAAAATTAAAAAATAAAAAAGAAATAAAATCATAAGACAAAAAAGAT  
GTCTAAATACCAGTCTCATCATTTTTTGAAGAATAGAACCCTCATGCTTAG  
GAAACAGCTCAGGTTTCCTTCATACCCAAAGAATACTTGAAAGGCCATTTT  
CTTTTCCACTATACAATTATTTTAAGTGTGCCTACTATTAGCCCTATTG  
CCTTTATAAGCTGATATGTGCATAGTCAGGTATAGAATGTTTCATATCCA  
AGAAAACATATACTGTGTTGTGAGCTAAATGACACATTACTAATTGTTTA  
TTTTCACTTATTTTTATCTGCCTCTTGTGGGTTGAGTTGCTGCCAATGTC  
TTTAGCTCAATAAATGTTCTGTATATACTCTTCCTGGCTTCATAATCAAC  
TTGTAGCTTCTAGTCACATCTCAAATAAATATTGGCAAAGCAATTCAAAT  
CCTTAAATGCCTCAGCAGATTGATACATTCTCAGCTAGACAAAAAATAA  
AAACAGAATCCTGAATGTGCATCGTGTGTGTGCAGCCTTTATCACAGGGTT  
CTTTGACTACAGTAGATTCAATGAGTCAAACAACCTTTTCCATGTTCTCT  
CAGACTCTGAAATCTTGGGCTAAGTAAGAGTGATGTTTAATATCCTGCGA  
GTGTATTTGTATTTGATAGTAGTTTCCTGTGAAACAAAAGAGAATTGGGG  
AAAAATGAGCTTATGTATTGGCTTTGACAGAACCCATTATGGTAAATTCA  
AAAGAAGCTGGGTGGCAAACATAACTGTTGAACTGGCAAATGGCCATGGT  
CAAGAACGTGTTCTGGGAATTATACTCAAGAAAAAAATGTTAAGCTCATA  
AGCCTCTTTTTTCTCTTTTGAGGACTTGCGTGCAGATGTCATCCAAGAA  
GGGTCTCTTCTACTTCTGTCTTTATCAGAGTCTTCATTTCTGAACAGTC  
AAGTCCAGGTAAATCATCATTTTTTTTTTCCCCTCAACAATTATAAAGTCA  
CAAAGACATGAAGACAGAGCCAAAGGGAAGCCAGAACCCTGGAGTTTGGA  
ATCAGCTGGAATATTTACTATCTCACCATAGTGGTGGCCGATGTAGATGT  
ATTTAGGTAGTAATAGCCTCAAGATTCTTGTGGCATCCCTTTTGTGGC  
AGCAGTCCTTCCCAGATCCAACCTCTCTCTTAGAAGCCAAAGACACAGGT  
GGTCCCTCCTGATTTCTTTCCATGCTGTATCTCTCTTTCTTTTGCAAGCT  
CTGCTTTTTGTATCTGTCTCTCAATCAAAAATGCAAAATGCTTTTGAATCC  
ATTGAAAATGTCAGTTTTATGCTGCATGGTTCAATTACCCCAGAGGATTA  
TGTGGAAGCTGCTTTGTGGTGGAGGGTAATCCAAAATCTACACAAAGC  
CAGTGTGTGTTGCCATTTAGTCAACTATACCGTATGACATGGCAGTTTG  
AGAAGGTAGTCAGCCTCCTTTAGGGAGGTCAATTATGCCCCGGTATTTTCT  
ATGTATTGTGCTTGAAAGCAGCCTAATATTCATTAATTATTTTCATTTTG  
GTTTACTTCTTTGACCTTAAGGCCCTCAGAATTCCTTGTGTAACAGAAT  
CTAGATACATATTTTGAAACATATGTATTTTTAGTTTCTAAACAGAAAA  
ATTGCACTGCTGGTTTAGGTGACAATTCAATAGGAGGAAGTGAATATCT  
TGACCTAATACCTAAAAGAAAAATGCTGAGGGTTTACCGCTTCTATGTGCA  
TAATATTTTTGTTACTAAATCCCTCCCCATTAAGGACTTTTTTGCGAAAA  
ATAGTTGTCTTTGGATAGAGGATAGAGGATAGAGGATAATGTCTTCATTT  
TGAACTGAGGGGTAATATGCTTAGCTCTTCTGTACATTACCCATTTGCA  
TTTAGAAGCAAACCTCTATAATTTCCCCTTATACAACAAATATATACATAA  
GAATGAAAATATTGTAATATTCCTTATAAAAGTCTCACTGGGCCAGGGAA  
TGAGGAGACTATGGGCCATAATCCCTACTGAGTAAATGGCAGGAAGAATG  
CAATGTGTCAAATAACCTACTTTCATTTGATCTACAGCAGAGAATTATAA  
TTTCTTATTTGAGATTCTTTCATTTTGTATTTGTTGGTGGCA  
AATAATTAGGAAAGTATATGATCCATTGAGGAAAGAACTTGACCAGCTTT  
TGTGAATTGAAGAAGTCGAGAGCAAATGTAGACAAATATTCAGAGAGGAC  
ATAAGCATGATCTCAAATTAGTAAGCATTGTATTCAATTCTCCTATTT  
TGGATTTTAGTGACCAAAAGTATCAGCCTAGATTTATCCGTGTATGTTAC  
AGTTCAATTACTTGGTGAAGGAAAAGATGCAAAATACACTTTGAATGTAAA  
GAAGCAAAGTGGGGGTAGAGAAAAGAGATCTCTATTTGTGTTTTTTAAAT  
GTCTTTTATTTCTTGGAGCTTCCTGATTTTGGCAAGATGATCAAGAAGAA  
GACCGAGAGAATTGAAGTAACCTATTCTTATCATTCAATGTGGGAGTTATT  
CCTCTTTGCTTCTCTACAAAACCAGTAGCTCCAACCACATTCTGAGTTC  
TTCTTTACAAAACATGTTTAAATCTGACAAACTGCTGGGAAAAGACAAAAG  
AATCTGAGCTTGATCTCAGAAACACTATCAATCTCTTCTTCACCTCAGA  
CACTCCTTTGAAGACACTTAAGAAATCTCCCAAAATAAGAGATAGGAATG  
TTTAATTTGAAGAATTTGGGTAAAGATTACTGCACACAAGGTTATTTGTAT

AATAGTGGGTGCAGGGGTGCCTGAGTGGCTCAATTGGTTAAGCAGTCAGG  
ATCTGGGCTCAGGTCAGGATCTCAGGGCCCTGGGATTGAGCTCCTGCGTG  
GGGCTCCACGCTCAGCACGGAGTCTACATGAGGATTCTCTCTCTCACTCT  
CCCCTGCCCCTCCCCCTCTTGCTGTGCTCGTGCTCTCTCTCTCTCTCTC  
TCTAAAATAAGTAAATAAAATAAATCCTTAAAAAAATTAATTGGCAGAGTC  
CCATCAGTCAAAAACATTAAGAATCTTCTCATACATTTCAATGTTTCGATA  
AATTATTTTTTCTCCATCTCGGTGCCCAGAATGAGCACAAATGGTTGCATG  
ATTTATGTAGATATATGCAAAAGCTCTGCCAACAGGTACATGTGGGAGAA  
TCAAAATCTGCTGTCTCCACATATTCCTTGACCTCCCCCTCTGCTCCTC  
TTTAACAAGTACTGTGCTCTCCGTGCGTTATTTTCTCTCGTTGCTCTCAC  
TTTGCTTTTTATACCTCTGCTCAAGTCGTTGCCCCCAATTGGACTGCCTGC  
TCCTATCTTTTTCTTCCAACCAAAGCATACCATCTGTAAGTTCCAAATAA  
AGACCAAGTTCTTCCCATAGCCTTCCTTGTCTGGATACGTGTCTGTCTCGC  
CCCTGAAGCATTAGGACACACCATGCACCTCTGTACGTTGTGTGTGTGTGT  
GTGTGTGTGTGCGCTTCTTCTTTCCACTTGTTGTTTTGGTTTTCTCCATCA  
CAAGTATTTCAAGCTTCTTCAACAAAAAGGACCATATTTCAATAGTAGTT  
ACTACCCACTGAGTGCTCATTACACAAAAGTAGCAAAATATATTGGTGCA  
AACATTGCAAAGCAAGTGATGAAAGAATCAAATTGAAGTTTCTTGTATAA  
CCATTGTGGTGTTATGTGCAATAGACATCTGGCCCCATTCACATACCTGAG  
AGTAAAAGTTGCAATGGCAGAAATGCTGGTTTTCCACTTTATTGTCTTTCT  
TTTATAGCCAGAGAACCCTTCCACGTAGCTAGATGTGGTAACATAACTA  
GACCTGGCTAATGGGAAATGAGCAGAAGTGCTATGTACAATTCCTGTGAT  
AAGTCTTTAAAGGGAGAAGGCCAGAACCTCTCTACTCTTTCTAATAGCAA  
CCTGACAGCTGAAGCACGAGTAACCATTTTGGACCAGGAAGGAGCCTGGG  
GACATACTATCATGCATTACATTATCAGCCATGGACATATAACCTATAT  
GTAAGGAAGGGGGTATGAAAACTGATAAAGAAAAGCAGAGAAATTTCT  
TTTTTTTTTCTTTTTCTTTTTTTTTTAAACCACTGTTGGCTGGGTTTTTA  
ACCTTTACCACTGAATATTATCTGATACCTTCATTTAAATTAGAAGTTG  
CACATTTTCAGTTTACCTAGGACAGTCCTGGATTACAGTGAGGCTTCACT  
GTAATATCCCTACAATGGCTCATCAATCTCAAAAATATCTGGCTTAGATG  
GCGTGTTTTATGGTGATGCTACATAATCCTCTCGATTCCAAATATTTCTA  
GCTGCAAAAACATTTATGGAAATGACATTTTTCTAGGAGTTTAAATGTA  
AAACAGCTAAAAATGGAGTTACTCTGGGTAAACAGGGTTGGAATGGTTA  
CAGTTTGTCTTAATAACTACACATCACAGGCGAGGCCTGAGTTAGCATGT  
ATGTGTGGTTTTTTTTGAGGGGGGGGTATTTATATATTCCTCACTTTTTTT  
TTCTACACAGGATGGGAATTTCTAACAATAAAAAATATAATATTGTTCTT  
CGAGATACATGTAATGATAAATACAAGAAAGAAATAAGAAAAATCTACTG  
CACAGTATTAATTAAAAGGGTCTTTCCCAATTGTGTTCTACCGATTTTCA  
CCAATTTACTAAATCTGCATGATCCTTACACACTCATGGGATAAGTACTT  
GGGTGATCCCAGTTTACCAGAGAGAAAATTGAGGCTTAAATTTTCACTGA  
CTTTCCATGGTTGCATAGCTTCTGAGTAAAGGGCAAAGCTGAACCTCAAC  
CTAAGGTCTATAGATGAGGAACTGAGACCTGGGGCCTGGTGAAATAAACA  
AGAAACAGGGAAGTTTATTAGAGCCAACCAATGGGATCCTGGCCTTCTGG  
GAAGTTCAACTGTAAACTGTCTGATAGATGGGAAGGAAAACAACCTTT  
TATTTAGCTTTATGTAAATGATGCTAGCCACTTCCAGTTTCTCTAAGGAA  
GGCAACCAAAAATAACTACCTTTGAGTGGATCCTTCTTTCAAAGTGTTATC  
TTCAGAGCTGGAGGCCCATGTGGATTACGGATGATATGGTACTCTGAGT  
GGTTTGAGGTCTCTGTATTATCCTAGTAATGGAATCCTAAGGGATTTCTA  
ACCGTGTATTAGGCTTTTACAGGAGTAAGACTACTGGCTGAAAACATGAAGG  
GAGGGAAGCCCAAGATGTGCTTCTCATGCACCATGTGTGGTGCCTGGTTG  
ACACATATTAGGTTTTCAGATGTGCTGAGGTTCTAAAATACTTTGCCTTTT  
GGCTGGAGCTTGAGTAGCCAGGATCTGTAGAGTCTCCTTTTTTTTTCCCC  
CCAATGTATAGAGTACCATGCACCTTAGGGTCATTTGCTTCGTGCCCTTTG  
ACATTATGGGAAGCCCTAGCCTAAAGCACCTGGAACCTGCAAAAACCAAGA  
GAGAGAGAGGCCAGGAGAATTCCCTGAGCTGAAGAACATGTGATTGTGAT  
ATCTTTGAAAATAGTTTCTGTAAATACAGATAGAGTCTTCCTTGCATACG  
TATGACATACTGTTAGGTTACAAATGGGGTGAAGTGTATTTTGGGTGCATT  
TAGCAAAGCTAAGAAATACATACAAGTCTGGTCCATCCTGGAAAACTGG

AGTACACATTTCAGTGCACATTAGCTGGGCATTAACGTTCCCTTCAAACT  
CCCCCTCCCTGAAAGAGTTATTTCAATGGACAGAAACACCAGCAAGTATTT  
TCTGTGATGAAAATATTTTTTCCCATGACTGCTAACAGTTTGTGCCTGA  
TCCTTCCCAACAAACCAAGTACTTAATATGTTTTTCATGAGCCCCGCCATT  
TCTTGACAATGCATTCAACCTCCCCATCTGAGGTTTTTCAGAGTAGATTGT  
TATAATAAAGGGCAGCATAACAGGACAAGTTAGTTGAGGATGTCAGAGCAT  
AGAAACCAGAACTGATGTTTTATGACTGTTGTCATTATGATGGTTCCTTTA  
GGTCATGTGAGCTATCTGCATATCTACGTATCTACATATCTACATAGTGC  
TGCATGTTTTATTAGAAGAACAGGCAGGTAGCATTTCACACAGTGTCTC  
CTGTGTAAGGCTCAGGGGGGACGGGGTGGGCATTCTTTAGATCAGTGTTT  
CTCAAATTGTGATCTGTACATCACTATCAACCAGGATTAGGAACTAAAA  
TAGCTTGAAGATATTGGGGTTATATGCTTTTTTAAAAATATATTTTATTTG  
TTCATGAGAGACACACACACACAGAGACAGAGACATAGGCAGAGGGGG  
AAGCAGGCTCCCTGTGAGGATCCCGATGTGGAACTCGATCCCAGAACCCT  
GGGACCACGACTTGAGCCAAAGGCAGGTGCTCAACCACTGAGCCACCCAG  
GTGCCCTGGGGTTATATGCTTTAAGTAATAGTACATCTAGAACAAAACAT  
TTAAGACTGAATAAGTGGTTGAAGAACAGTGAAGGATGAGGCTCTTTCCA  
TTTTTTTCTACTAAACATCCTTTACATGGTTGACTTTTGTCCATATTCTT  
TTGTGGTTACTAGATGACACTGTGCCTCTGTCAATCCACCTTCCTTCCAG  
AGAGGAGAAAAGAAGAAGTAAGAAGAGGTTAAAGGTCATATTAACCTTTA  
TGAAAAATACAAAATTATTTCCAGAAGCTGTCTCTTACATGTCACTAAG  
CAGGATTCATCACATGGCTACCGTCAATTCATATTTGGCAAAGGTGAATA  
AGATTATGGTGACCAGTCATGGCCAAGGTGACCAGCTGCCTATCAAAGAG  
TGTTGCTTCCCTTTTCATAGTTGAGAATGGTTGCTGAGAAAGCCCTTCCTC  
CATAAGAGCAAGCTGCATTTCCAAGTCTCTCTAAAATGTAGATGGAGCCA  
TGTGGCCAGATCCTGACAATAGAATGTACATGGTAGTAATCATGTCTCTT  
CCATAAGGAAATGGGAAGGAGGTGTCCCTTCCCTCTGCATTCCTGTGTG  
TGTGTGTGTGTGTGTGTGTGTGTGTGTGTGTGTGTGTGTGTGTGTGTGT  
AAGGCCAGGAGACATGGTCAAGCTGTAAGATGTCCGTGAATTACCACATA  
GAACACCACCTGATATACACCCACTTTGACTCCTATATGAATGAGAAATG  
AATTTTCATTTTGTGTGATTTATGAAGTTTGCCTGGTCAACTTGTTACAGA  
GCTAGTCCTACCCTAACTGATACATTGGTTTAGGCCTGTCATGACTCATC  
TAAGTGGAGAGCGTAAGAGACTATTCCTTTGAGTCGTAGGTGTCTCCCTG  
CTTCTAATTCATTAATTGAGCCTCCATTAGGGGGGAATAAGCAGGCATAG  
ATATTATAATAGCAATAGAATATGTCTATCACCCCAAATGAGCAGTTTGG  
GGCTACCTATTGAAAATACGAAGCCCTGAATACTTTCCCGGGATTACTGA  
ATTAGGCTCAAGTGTCTACTCTTTAACAGCACTCCAAATGATTCTAATGA  
TCCCAAATTTTGGAGTAACTTTCTGCAAAGTATCATAAAGCAGCAGCCT  
ATAGATCCTTAATTTACTATGCTCCTCCAGAGCACTGATGTGTTAGACAT  
TAAAGAAGGTATTGGAGGGCAGCCCTGGTGGCTCAGCAGTTTAGCAAACC  
CAGGGCGTGATCCTGGATATCCAGGATCGAGTCCCACGTCGGGCTCCCTG  
CGTGGAGCCTGCTTCTCCCTCTGCCCATGTCTCTGCCTCTCTCTCTCTCT  
CTCTCTCTCTCTCTCTCTCTCTCTCTCTCTCATGAATAAATAAATAAA  
ATCTTTAAATAAATAAATAAATAAATAAATAAATAAATAAATAAATAAATAA  
GTATTGGAGGCAGAAACCACCTTAAAGGTGAGTGTGAGAGCAGTCTTAAC  
GATGGTGACAGGAGATGTAAGAGATGCTGTCTACAATCACCTGGCTGGTA  
TCATGAGCATGTGACATGAAATGTCGTGGAGAGGAGGGTAGTATCCTCAA  
AATAAGACAGCAAGAAGCCTTCAGTTCACTCAGGCTTGTCATTTCATCTAA  
ACACAGTTGCCATAACACATTACTCAAAGGGTTGCAAGATAGGCCACCAA  
TAGCACCCCTGCATGCTACAATCAAGTTTTTCAAAGTTTAATGCTAGTAAGG  
ATGGCGTACCTTCTATATGCCATGGATCTCCTTCAGATACAGGTGCTGA  
AGACTCTAGAGGAGGTATGTGGAAGTGGGAAGTGAGTCACTTTTGAGCA  
TCAGGGCAGATAAGGATTTATCTTTATCTGGTTACAATGCCGGCTGGTAA  
GCCTGAACTAGATCAGTAAGTCCAAAAGATTAATATAGCAATGGTGAGCT  
GATGTAAAAAAGAGTCAAGTGAAGTCAAGTGAAGTCAAGTGAAGTGAAGTGA  
GAATATTCATAAAGAATGGAAACAGAAAAGGGAGGCACAGAGGAATTCAC  
TTGGCTAGTAAGCATGTTGCAAATATCTTTTCCACAGTTTATTTCCATGT  
TTCTGGTAGAAAAATGGCCTGAGGAGTCAAGATATCACCTAAAGTTCTTC

TGAGTAATTCACTATTTCCCTGAACTCCAAGGGACCCAAAGGGACAAGGG  
ATGGCTTAATTTGATGAAAGTAGGTAAAAATGGTGTAAATTTAGTTGGCG  
AGGGGCAGAACAAATACTGCTGATGGAGGCTCAGAGATTAGATGAAGGAT  
CTATGATCGACATGGATGAACACGAAAGGCCACCTCGTGTATCCACCTTG  
CAAGTTTGCTTAGGGAGATGGAGTTAGTGGCTGAAATATTACTTTAGGTA  
CTTTGAAATGTAATGTCTTCTGCCCTCTGGTGGTTACATTTTTTTTTTCA  
AGTTTAAGTAGGAAAATGGAATGTTTTCCCCACAGCTTGGGGAAAACAGC  
ACTAAAGGGTATCACAAGGTTCACTTGGTTGAGCTGCACTGATGATGCTC  
AACTCCCTCATTAAGAGTGCTAGCCCTTGAACAAGAAAGGAAAACACACA  
TCAGTTTTGTCAGATGGGCTAGGAAGTCTGCTTTCTCCCAACTTTTTCCCT  
CCCATTCTTCTGGAATGTTTTCCCTCATGCTTCCAACATGGGAATACTTCA  
GAGATTCCCTCAAATTCTGACTTCCCTTGAGATGGCTCTGACGTCCTGCTG  
CTTCTCAATATTTTCGATAGAAAAGCCTTTTTATGGGGTGCCTGGGGTGGG  
GTTTCAGTAGGTTAAGTGTCTGCTTTCTGCTCAGGTCATGATCCCTGGGTC  
CTGGGATGGATTGAGCCCCCTGAGTGGAGCTCTCTGCTCAGCAGGGAGTCT  
ACTTCTCCCTCTCCTTCACCCCTCCCGCCCCCAGCCAACTTGGGCTCTCT  
TTCTCAAATAAATAAATGAAGTCTTTAAAAGAGAAGAAAAGAAAAGAAA  
AGAAAAAGAAAAGAGAAAAGAAAAGAAAAGAAAAGAAAAGAAAAGAAA  
AGAAAAGAAAAGAAAAGAAAAGAAAAGAAAACATTTTTGTGACATGAAGGG  
GGCATTTCTAAAAGAACTTTAAGCAGATGACTTTCACCGGGTGATTATA  
CAGTAATACATTCAATGATGCTTGACCAGGATTTAACCAACTTGTCTCTT  
TCCCTCTGTGCTGTTTTCTGGGAGACAGAAAAGAGCCTGACCATTATCAG  
GGCAAACTGTCATTAAATTACATCAAATGCAAATAGTTGTGACTAACACC  
AGCAAAACAAAGAAATGGGAGTCCAGGAATAAACAGCACTTTAATGAAGAT  
CAGTGTTCTTCCAGCAAGAGATTTTCTAGATTCCATACAATTACAATTTG  
ACATATATACAAATATATAGAAAATAATGTATATAATGTAATATATATA  
TATATGTATCTCTAATGTATATACATATATTTATATATATTTCTACTATA  
TGTGTAAAATTTTGTGACAAATCTAATATATACACACATATATAAATATA  
TATTATATATATTTTATATATATATTATATATATATATATAAACCAAAG  
AGTATATATTACTAAGAAGACATTGGCTAATATATTTCTCTTTTGCAAAA  
AAATATTAAAATTAACATATTTAGCCCTGATATGTGAGGGATTTGTTCAA  
GAAAACCAGCCTCCATATTACAGGGATATGTTTTACACGAGTATATTATT  
ATATGTATAGCTATATATTTCCATATAATATAAACAATCATGTGTTTCAT  
AAGTATTTATGAATGAACCAAGGAATGAAGAATCTGAAAAAGTTTATAA  
CTTGCACCTGGATTTTTTTTTCAAAAAGAACTTCTTGACAACTCTACAA  
TATTGTTCAATTGGACCACATTTAGATTTCAGAGTAAAATAAAAGTTATTT  
TCAAACCTTTTAATTAAAAAGTTTATATTGTGCAAAATCCTGGGGATTGTG  
CTCATTTTAACAGCCACTGCACAGGTCAATGCTCCTACAAAATACAGGTA  
GTGGAACCTTCTGGACCTACTTCAATATTCTAAAACGACTATGAAGTAT  
GATTTGAAAACCTTGCCATTTTGCAGTTTAAAGTGGATGACTCTAAATTC  
AACTTTAAATCAAATTGTCTTCCCTGTGAGTGTAATTTCTACGTTTTT  
GGGAGGCCTTTTTATTTACTCAGCAACTGACTATTGCAGGAAGGGATGTG  
CCAATGATTTCCAGTTACCAGGAAAACCTTTGGTGCATCTTTTGGGG  
TTAGTAATATTTGATTTGCATTAGACTTCAATGTAACTTGCCATTCTAC  
TTGGCTTTCAGGAACAAAAGAATCTTAGGTTTAAATGATAATGATGGC  
TTTTGAAACAACCTTCAGCCCCTAACAACCTCCACATACACTCACAGGGGCA  
TCGATCTTTTTCTCAAATTTAAAAAGAGAGAGAGAGAGAAAAAGAGAGA  
GAAGAGAAAATAGAGAGAGAGAGAAAAGAGAAAAGAGAAAAGAGAAA  
GAAAAGAAAAGAAAAAGAAAAGAAAAGAAAAGAGAAAAGAAAAGAAA  
GAAAGAAAAGAAAAGAAAAGAAAAGAAAAGAAAAGAAAAGAAAAGAA  
AAGAAAAGGCAAAAGAACAGAGGGGTAAAGAGAGGTAGGAAGGGGAGGG  
GAGGAAAGGAAAGGAAAAGAAAAGGGAAGAAAAGAAAAAGAAAGAAAGGA  
AAGAAGAAAGGAAGAAGAAAAGAAAAGAAAAGAAAAGAAAAGAAAAGGA  
AAGAAAAGAAAGAAAAGAAAAGAAAAGAAAAGGGGAGGGGGAAGGAGGAAGG  
GAGATTAGAAGATCAGAGGGGATGCCTGGGTGGCGCAGCGTTTGGCGCC  
TGCTTTTGGCCCAGGGCACGATCCTGGAGACCCGGGATCGAATCCCACGT  
CGGGCTCCCGGTGCATGGAGCCTGCTTCTCCCTCTGCCTGTGTCTCTGCC  
TCTCTCTCTCTCTCTCTCTCTCTGTGACTATCATAAATAAATAAAAAAT

TAAAAAAAAAAGAAGATCAGAGGATATGTGTTTAAAAACAAAATATAC  
ACCTTATTCTCACACATTTGGCAAGCACAGATCCACAGATCTTGGCATA  
AACAGGTTTACATTAAATAATTCTCAATTGAACTCCTGTCCCAGTGCAG  
AAAATAAATATGCCCATGAAATAAAAACAAAAGCCTCACCGGGTTTACAC  
ACTGGAGTTGGTATTTTGGAGCATCAGAACTGAGCTATCAGTACAAGTCTA  
TGGAACCTTAAAACTGAAATTTTACCACCTTATTCGTGACCATAAGTAA  
TTATCAATAATCTCCCTCTGTACACACACTCAGACACATATTATATCTA  
TGAATCATTCTGTTTAAGATCATAGATAACTCATTTAGAATTTACCCTAT  
CCGCATTGATTATGGTGAAGAAAGTATTATTTGATATGATTATGATGAGT  
ATTATTAATCACGGTTGCTTTACTAAGCACCTAAGATGTATTTCAATGTC  
ATTTTTATTGCATATGAACACCAGAAATGTCCAAGTTAATTTACTAATT  
TTAATCACGTTTTATGGGTCACCTGTAGCCAGAAATATTATGATAGCTCA  
TTCAGATTAAATAGAATTATACACTTGACTTATTCTAAATCTAACATGAT  
ATTTTTTAGGAACTTTTGAATTTATGTACATTATGAGATACAAGGTTGAT  
TTTTATTTCAAGAACTAAAAATGAATAGCTCTGAACATCAACTATGAAATG  
AGAAATGAAATGACTCAAATGTTTCATGGACAATAGAATGGATAAGTTGTG  
GTCTATACAGACATTAGAAGAATATACAGAAACAGAACCGAATGATTCTC  
AAGTACATGCAACAATACGGATGAATCTCAAAACACATCTTTGAGTGA  
AAAGCCAGACCCAAGAGCGTACATGCTGCATGAAACTCCTTGACGAAGC  
CCACCATCGTGCAAAACCACTCTTCTCCCGTGAGCAAGACAAGAGTGTGT  
GGCAGGGATCGTGAGAAGCTTCTTTGCTGCTAGTTACGTTTCTTGACTTG  
ACCTTGCTCTGAAAGGCAGCATCCAGAGTGCTCTTTCTTAAACAGAAGCAC  
AATCATAAAAATATCAAGTTTAAAAGTCTTGTACCTGACAGCTTCCTGTT  
TTTGACAAGATGCCCCCGCCAAGATGCTTAACATGGCTCACCCGCCCTT  
TCATTGTTGACTCTTCTGAAGTCTCTTGCCTCATCTTCCTCTTCTCTTAA  
GACCTCCCCTTCTTTTCTTTCCCAACCTCCTCTATATTCGTGTATACTCG  
GCTGACTTTGATGCCTCAGGACCTCTATGATTTTCAATTTTTTTTAAATTCA  
ATTCTTCATTTGGTCTCCTCCTTAGACGTCTGATCTCTCCCCAACCTGGT  
TAGGGACCTCTCAAAGTACCATATATTTCTTTTAACTACCAGTTACCAC  
ATTACTCTGTCAATGCTTGTCAACTTCTATGTATCTCCCATCCGAACCCA  
AAGCCTGAGGACAAGGACCTTGTTTATGCGCGTTGTCAGAGCTTGGGCCT  
GGACTATCACAAGCTCTGGATATGTGTTTGTGTACCGCTCATTGAATTA  
ATTTATATCATGAGTGAGGTGTTTGAATTTCTTACTGTTATTTCTTTCTC  
TTTTGTCTTTGCTATTTATAAGGTTTTTTCATCATGGTTCACTCAGGACAT  
CTATTTGGTGAGAAATTATGACTTATGACAGAAGGTATACAATATACAAG  
GGAGAATCACTGACATAATATTTATCTTCTCACACGCAATATGTGTGGGT  
ACGCATTACCTATTTGTCTATCAGTACATGTCATGAAGGCAGGAGATATT  
ACATGTCAAAGTGCTTAAAGCAATATTTTCAAGTACTAACTCAATCTCCCT  
AAACAACTTGCAAGGTGGATAAGCAGTGTAGCCTTCTGAGGCCTCCACG  
TGCCCTCCTGTGTTGTTATTTGGTCACTCACCTGTGATAGGTATTTAGA  
TGATTGCCAGCATTTGGTTATTGTAAATAAACTGCTGTAAACATTCTTG  
CCCAAGTCTTTTTTAGGAACACATGTTTTTCAATTTCTCTAGATAAACACCT  
GAAAAATAGAATTGTGGGGTCATAGACAAATCTTTAAAAATAAAATTCTGTA  
TGTTAAGGCAAAAAAATCGAAAAAAGAGAAGATCCTTCTTGAGCTG  
CCCAAGCTTTAGTTTATTTCTGAGTGTCTACTGCATTATTTAGATTT  
CTTTTTTTTTTCTTGGCTGGAGATTTGTCTGACTTATGGGAATTTGGAAT  
TGCCCTTGCGATTGCGTGTGGTAACACAATTGTATAGAAGCTTTGTGAAA  
GTTTTTGTGTTTCCATGATGTTGAGAAGTCCAAAAATTAAGAATTATGTAC  
TCTGAGTGAAGTCTCACATGAGTGAAGTTGGTGTGCGCCAGGTGATGAGCC  
CAGGGCTTAAACAAATAAGGTAAAACAAGAGTTTTGCTTTTTTGTGTTTTG  
ATTTCTTTTTTTTTTTTTTCCAGAGTGTGGCTCAAGGACCACCTGAATCAA  
ATCACCTGAGTAGCTGATTAGACACACTTATTTTTTTTGAAGATTTATTTA  
TCTATTTATTCATGAGAGACACAGAGAGAGAGGTAGAGACATAGGCAGAG  
GGAGAAGCAGGCTCCCCACAGGAACCCGATGTAGGACTCAATCCCAGGA  
CCCAGGGATCACAACCTGAGCCAAAGGCAGAAGCTCAATCGCTGAGCCCC  
CCCAGGTGTCCCAATTAGATACACTTTTTTAACAAGCATCTTGGGGACCCT  
TATGACTGGAGAAATTTAAGAACCCTGGATCAGTCCAGAGCAGAGATAC  
CCAACCTCTGCACATCAGAATTTTCAAGGAGAGTTTTTCAAAATCAGTAAACC

CACCACACATCTAAGACCAACTAAGTCAAAATCTCTGGGCATAGGCACCA  
GGCATCCATATTCTTTAAACTCTCCAGATGGTTCTGGTGAGTCAGGGTT  
GAGAACTCCTGATCTATTCTGTGCCATGTTTAGCCAGTTGAGGGCCCTA  
CTACCTGCACCTCTGGCCTGTTGTACATCTGCATCATCTAAAGATAACT  
GGAGAGGATTTCAGGTAGAAACGTTGAGTGGGCATAACTCTTCAGGGGAGT  
TGTTATACTTGTTTCGCCCTAATCTTATTTTCATTGTGAAAAATCACAGATC  
TTTAGAAGTTAATCTATGCTTTAAATGGCAAAAGTAAATACTATGTAAGT  
TGTTAAAAAGAAGACAATAGACCCCTTTAAAAAAGGAGGGGGGCACCTGG  
GTGGCTCAGTGGTTGAGCATCTGCCTTTGGCTCAGGTCGTGATCCTGGGG  
TCCTGGGATCGAGTCCCATATTGAGCTCCCTGCATGGAGCCTGCTTCTCC  
CTCTGCCTGTGTCTGCCTCTCTCTCTCTCTCTCTCTCTCTCTCTCTCTCT  
CTGTGTGTGTGTGTGAGTCTCATGAATAAATAAATAAAATCTTAAAAAAA  
AAACAAAAACCTAAAGCAGTTTCTAATGTGAAGCCTCAAGTCAACAAACT  
GAGTTTTAACTTAGTTCTCATTTTAGTTCTCCCAGAAATGGGATCTTACG  
CCTGTCAGACAGGAATCATCTGATCAGCTCTAGCTAGGTCATCTGCCTGA  
AGGGCCCCCTACCTACTATCGCCTAACCAGCCCCCTTTTTGTCTAGTATGA  
CTTCCTCGTTCCTTTTTCTCTGGCTATACAAATCTTTCATTTCTGTACA  
GCTCCTTGGAGCTTCTTTCTATCTGCTAGATGGGATGCTGTCTGATTTGA  
ATTGATTTTTGCTCAAATGAACACTTTGGATTTTAAATATTCCCCAGTTT  
ATCTTTTAACAAGTCTCTAGGTGGTCCTTGTTAACCTTGAAAATTTTAC  
CAGCAAAAGTGGGCTTATTCAGGAGCAGCCCAGGATCGCAGGCCAGGACA  
AGCAAGCTACAGCAAAGGGCAAGTTCACAGAACAGAGGAGGGGAAGTCTA  
TTTTATAAATGAAAAGGGGAAGCTGAGAAGGCTGTTATAAACAAAAAGT  
TTACAGTATAAGCCGGGAGTACAAAGCATAGTGGCTTTTCATGGACTCAG  
GTGTGACTGTCTCTCATTGGCAGAGTCGTTGTCAGGGAAGGAGGAAAGCC  
TTTCTTCTCTGGCCAGGACAGAAAAAGTCCTATGCACCTGCCAAGGTCC  
AGCTCTTCCTGTGGAGTCTGCGATTGAGGTCGAGAGGTAGGGCATGAGAG  
CTCCCCCTGCTGGCCTCCCGACCCCATTTTTGTGAGACATCCCTTTATTA  
ATTTTCATATCATCTCACGTCCTAATTTTATCCATGCATCAACACGAATG  
TTGTTGTTAAGCCAAAGAATTAGAATCTGAAGTATGTGCCGCATAAAGAC  
CTCTTTCCTTGCAAGCAGCTTAAGGGCATGCCATTTTCAGCTTTCCTGAAA  
ACATTATAAAAAACCTTAAATGATGACTTTTTCCAAAAATAAATAAATAA  
ATAAATAAATAATAAAGTGAATAAATGATGAACCTTCTTAATGCACTACC  
GTGCAGTGGCTTAATTAGTGGAAGTGTATTATATACTCAAATTTTCAGGAA  
TGCATATATTTCAAGGAAGTGAAATGCACTTTTGGGGTAAACTTCCTAG  
GATATTCATTAGGAACGTTAAGAAAAGCCACTTTCCCCCTTTTCATTTA  
TAAAAAGAGTTCCTCTCCTTGTCTGTGAACCTTGCCCTTTGCTCCAAA  
ATTTTCAGTAAATTATTCAGTAAATTTACTTCGATAAAACGTACCTGATA  
AAGTGCATTTTCGGCTACACGTAATTGGATTTCTACTTTAATGCTAACCTT  
CCACTTTTTTAAATTTGCTAACATCGACTCGACCATATAATAATTCACCTA  
AACAGCAGCTTAAAGACTGTTTCTATTTTGTATTTCTAAATGCAACTTTC  
TGTGCCTGTCTGCTCACATATAACTGCTGTCCCCAAGGAAGTGGATTT  
TATTCTCCAATGAAATAATTTGGTGGAGTGTATCCAGACAATTGCATGAG  
TCAACTGAAGCCACGGAATTCCAGCATGCTAACTGATAGGGGGCAGAAGT  
TTTCACCTTAAATATGCCTTTTGGCATAAGGATTATTTAGACTGATTA  
TTTTTTTAGAAAAACAGTAAACACCAGAGAAGCTCTGAAACCAAACAGAAC  
TTATTCTTTTGTAAAAGCAATTTACATTGATGTGGAAAAATTTCCATTTGT  
AAGGGGGCCTCCTTCTAGGTACAGGAAAAGGAGAATGACTTAAATCTGT  
AGAGACTGTTATCAATATGGAAGATGAGGATTTAAATCTGAATAAGACCC  
ATATCTTTTGTGATGTGCTTTGCCTGAAAACCTGGCTCTCCCCACCACC  
TCCCACACCAATATCTATTTTGTCTTTACCTGGAGATGGTTATTTTCAGG  
TGATGGCTTGGGCCATTTCTGTGTAGTCATTTTTTTCTGGGTACCTCC  
GATGTATACAGGAGGTATATATGGTGTAAACATCTGTTTTTCCTCTGTT  
AAGCTCTCTTTTATTACAAAGGGTCTCAGCCAAGAACTAGAAGGATAG  
AGGAAAACCTTATCTTTTTCTCCCTACAACACCAAATAAACTTACTTTCA  
CTTTAGTGAAGAAAAGGTTTTGAATATCCAGGTAAGAACCTTTGGGTCTT  
TACTACTTAAGTTTAAATGACTTAAGCAACCAGATACAAAGTTCTATTTGA  
AGTAAGAAGTAACTTCATTTTATTCTTGAAAGAGGGCCTTGGCTGACTTC

ATTTTGACCTCAAGCTTTCTAGTTGGGTCTTCTCTCCAGCTAGTCTCAA  
GGTTCAAGTGGGAAGACTCTGAGGGCAAAGCATCCCCCATGGGAACTGAAA  
CTACCCCTCAAGCATAAGAACTGCCCTGAGCCAGCAAGACCCCCACCT  
CAATGATTGACTCCATGACAATGATCAATTTGACCTTAACTGCCACCTG  
CATGTACCCCTTACTTTGCTCCACATTTTTTCTCATAAACCTGGAAGTAT  
TTTCAGGACTTTGGAGACAATCGTTGAGATGCTAGTCTGTTGTCTTCCTA  
CCAGTGTGGCCTCAATGAAATAAATTTCTATTTTACCCTACTCACCTC  
TCTGTCTTTGGATTTTGTGAGGGAAGAGTGGCCAAACCTCATCGGTTTGG  
ATCCTCAGATCCAGGTGCTCTTTCACCCCTGCACCCCATCTAAACTCTGA  
TCCAGAAAATTGATCACTCTGAAGAAAATCCCCCTTTTCTTTGTCTCTCC  
AAATGGGTTTAGGTTGCCTATTGACAAAGCCTCGCCAGTCACCGGAACAT  
GGGACTCTCCTGATTAATAATCATATTAATCATGCCAAAATTTTCAGTAA  
AATATTCTCTTTGTTTTCAAAATTGCCATCATACGTAGAGGCTTTGAACGC  
TATGTGAAAGAATAATTTGATTGGCACAGACTATAAGTCATCTTTGAAAG  
AGCTTGGCCACCCCTCTTCCATCTGTACCATGCCAGTCATGTCTTTTTG  
GAATTCCACAGGCTATAGCCTTTGCTATGTGCCCTTTAAGCAACCCCTGT  
CCATCCACCATGCTGTTGGCCTCCTGCCATCCTTTCTAGCACACTTTAAA  
CAAATAATAATTGGCATTGCTTGGCTGAGAGTCCGTTTATTTTCTTGCT  
ACCCTTCCCAGTTGCCTTAACCATCGGATGTCTTGACAGTTGGCAAATGG  
AGACTGTAGGTCTGATATGTCACATAAGATCTGTTGGATGAATATTTTCC  
TCCAGGAAAGAGTGAAAGTGAAATCCCATCCTGACCCACCCCTCTTTCCAA  
AACATAAACATTTCTGGCTGCTGTGATTCCCCTAATCATTTAAAGCAG  
TACAGTTGTTATGGAATGGGCAGCTGAACTTCATACTTGCTGGACCATC  
TGTTCTCATATTCAGTCTCTAAGAAGATTACCTAAGTGACTGTGGTTCAC  
TTAGTAAAAGAGGGTGAGTTCCATCAGGGGACATGTAAGGACGCTGTGTC  
ACAGAAAAACAGAATTCAGAGACTCTGGAGGGACTATTTTGTGTTGTG  
TTGTTTAGAAATGGTGAATGTTTTGGAAAAATAAGACATTTCTCCAAA  
TACATAGATAACACATGAATAAACTTGTTTCCAAGTTTACAACTCATGT  
TAAATTTTTGATAGAAATGAGATACAGTGGATGAGGAAAGCCAAGTAGCT  
TCATTCCTCTCTTTCTTGAGACATATTTTCCATTGTGGAGGCATCTTACA  
CCTAAAAGGTCAGATAAAGGGAACAATTTACACATAATAAATGTCACGAA  
GTAGGGTAGGCCTGAAATATTGAGAGAGTGGATGTGAAGATGTTTTTATT  
AAGTGAAAATACTCACATAGAATTTAATTATTATTTTCCACTGTATTTTT  
GGCTTGAAACATTACGAACAATGAAGTACTTTTAATGTCGTTTCAAGAAA  
TTCGACCACGAGAACAAGACTTCTGGTTTTGTTTAAGGCTAGTAGAGGA  
GAAGTTAAAACCTCTGTGCAGGATACGCAACCCCTTATACTCTATGTAAAGA  
ATATAGATATTATAGGTTATAGGCCTTATTCAGACACGGTAATTTTTTTA  
ATGTGATCTCATATTAAGGAAATATGTGAGTTAGTTCAGTCAAACATCCA  
GTAGAAAAATAAAGCAAGGTGAGGGGTAAAAGTTATAGAGCAACAGTG  
GATTGTAATATAAGAAAAATTTCCAATTATGAAACATCCCCAAATGGGAT  
TTTCTGTTTCTTCAAGTAGCAAGCAAATCAAATCTAACTGGAAGTATTA  
GAAAAGGAACCTGGGACTCTCTGAATGAGATATGTACTTTGGGTATGGAA  
TTTGACTGGCTGGCCTTTGTGATTCCAAAGTGTTGAACAAATCATAACTC  
AAAATTATTTAACTGTGGACATTTGTGGTATGTGAGCGAAATAGGTTTCAT  
GAAAGCCAAACAGAATTTCCATTTTCTATTTGTAACCTGAGAAAATCTAAT  
TTTTAATTTACTCCCTGCTTATTTTTTAGTTGAAAAAAAATGTGGTCCT  
ATGGAGTTGACAATTTAACAAATAAATTGGGGACAGAAGGAAAGAGATTG  
AAAAAGTTGGACAACATGTTATGAAATAATCTCATAGTGCTTGTGATGTT  
TGTTTTTTATTTTGTGATTTATTTTGTGAAATGAGGAGTAATTTAAA  
CAAGAGCATAATTTAAGGAAGGATGTTTGGGGACGTGAGTGGCTCAGT  
ACGTTAAGCATCCAATTCCTTGGTTTCAACTCAGGTCATGATCTTGGGGTC  
CTGAGATCGAACCCTTCCATTGGGCTTCTTGCTGGGGGCAAGTCTGCTTGT  
GCCTTTCCCTCCCCCTCTGTCCCTTCCCTCTGCCCCCCCCCTGCTGGC  
ACATATGTGCTCACTCTCTCCTTCTCTAAAATAAGTAAATAGAATCTAAA  
AAATTTAAAAATTTTAAAAAAGAAAAGAAAATGTTTGACACTCCTACAAA  
AGCTTGGTACTCAGCAGCAGGTAAACCTGTACGGCTGCATAGGACTAAGT  
AGGTTGGCAAGCAGATTCCCTAATAGCTTTCTTGTTGAAAAAAATTGCAG  
TTCCCAGGAAAAATAAAGGGAGGGGGGAAGGATTAATATAAATATTAAA

GACAGATAATGTGAGAGACACATTTTCTCCCATTTTCCTCTGACATTTTA  
ATTAACATTCCCTTGTTTTGTTGGAGGTGATAGTGACCTACCTTAGAAAC  
TACATTTCTCAGCCTCATTTGCAGATGGAGGTATCCATGTGATTAAGATT  
TAGCCATTGACTGTAAGTGGAAGGCCCTTGAATGAGGGCTTCCAGCAAGC  
TCTGTAACAGGACTGACTCCATGACAAATTCTTTTGGCTTTTTCCCTTTG  
CTTTTGGGGTATGGACTCCAATTTGAAAAGATAAGAGCTAATACAGCAG  
AAGCTAGAAAGATCCTGAATTTTAAATGGCATTACGTATTTCCATACCA  
TTGCTGGGCAGCCTATTCTAGATTTCTGTGTGAGAGAAAAATAAACTCCC  
AACTTACATAAGCCACTGTTTTTCAGCTTTCTATCAGCTGAAAGTGATTT  
CTGACAGACAGCACAAAGACCTCTTGTCTTGAACCTCTCTGAAACATGTTTC  
ATTTATTTTTCTGCTTGTGGGGATCAGCATTTATATTTGCTCTAACTGTA  
CTCCATTCTCTGTTATAGGGAGAAAACATTTCTTAATAATCCAGTTTACC  
CCAGAGAAAAGCATTCAATAATAAATACATGAAAAAGACAAGAAGAAAAGA  
ATTTTGAAGGCACATAGGGAAATCAAAGGGGAGAATGTCTTGAACACTTT  
TGCTCTGATTTTAATAGAACTGAAAAATTTCCCTGTATCTTAAAACAGTG  
TGGCCATATCAGTTTCTTGTATGATAAATCTCTGCTCAGGAAAATTTTAC  
TTAGGATTCTGACAATCTGTTACTCATCTGAACGACTTCTTATAGGGAAT  
TCTCTTTGCTCTCTTGGTTTCATGTTTTCACTGTCTTTTATTTTCTACCC  
AACACTTACATGTTTCATAAAAAGTGCATTATATAACTTACCTTGTAAGTAT  
TATAGAGGAATCCATAAGAAAACACACAAAAAGCCTATTTAGGAAGACA  
TCATAAATCTCTACTGTAAAGCCTACTTTAGAAAATCAAGATGATAAATA  
ATTTTAAAACTTGTATTGCTTGGTCTTTATTTACAAGTTAGGAATGATA  
AATGAAAATTTCTGCATTTTATGTCCCAAGAATCATCTCCTGAAATGCAG  
ATTAAGGAGAGGACTGAATTCAAAATAGTTCAAGAAGGCAAAGAATCCTG  
CCCTCCCACCACAAAGAAAAGAAAACAAAGCAAAACCAGCACACAAAAAT  
TAAGCTAAAACTCAGTAAAGATTTTAGTTGACAATAAACAGTATATTTA  
AAAGGCTAATTCAATAGCTAAGCAAAAGATTTGAAGAGTACGTAATAATG  
GCTAACACTGACATTTTAAATGAGGGCTTGACATATTCTATATTAATTTAA  
TGTATTACCCATTTAAGAATAGATAGTAATATTGTCTAGTATATCTTAGAA  
TAGATAGTAATATTGTCTAGTATATCTTGTGCTTGTTAGTCAACCTCCAGA  
GAATAATATACAATAGTAAGTAACAGTTTTTAAAAGGCTGAACAACGTATT  
TCCCAAGAAAGAATTACTAGGATTGGGGCGGGGGGAGTCAGAAATCACGG  
CACATTAGATCATGTGTAAGGAAGGAATATGTTCAGAACATTCACAATCA  
GTGTCCAGATCATAACCCAATTCTACTTAATCCAATAAGAGCAGCTGATC  
TTTAAGTAACCACCGACTCCATCAACTTCAAATATCTTTGAGACGTGTAA  
ATCTTCCTGGTTCGTAGTATTTTGGAAAGTGTTACCTTGACACTGGCCCAA  
GTAACCACAGTGATTTTCTAAAAATGGCTATCATAGTTCTCTATGAGTAG  
TTCCAGGCAAAATATATAACCTAGACTTTTCAAATATACCATAGAAGATC  
CCCTTAGACTTCCTGGTTTACAAGCTGAGACTCTGAATGGTTGAACAAAA  
ATTCATATTCAATTTCTTGATTCATTGGAAAAATTGTCTCCTCGTGGTTA  
GCATATTTACAAAGGCACAGATTAGGACCATTTGTCTTGGCTCCACCTGT  
TGACATTGATCAATAAGCTGTTTTAGCACTCAACTACATAAAAGATTTAC  
ACTTCTTTCCATTGGAAAACATTCTTTGAAATCCACACAGTCATTTTAG  
GATCTGCTATAAAGACTCTTTTTTGTGCCATTTATAGAAACACAAACTCA  
AGCACGGAATATTTCAGGCATGAAATAACAATAATAGAAAAAAATTACTA  
TAATCCAATCATTAACATTTTAAATTGTTTAGACAGTTGGATTAGCATAC  
CATTAGCATATGCTGTTTTTAGAGTCTCAAATTAATCTATGAATAACAA  
TAATAATAGTAAGGACTTCCTAAAGACAAAAATATATAGATCAAATTTCA  
AGGTTTGGCAAAAGGAGACTTCAAATAGTTTAGTCAGAGTCTATTTCA  
GAGACTATGCTTTTGGTTATGATTATATTAATAAAATACATACATTTTGC  
ATATATTTTATCAATAAATATATAATCAATTCAACAATGGAACAGGTATT  
ATCCTGGGCGATAATCCTAGTACTGTGGGAATATGGTATGATACTTGCCT  
CCAAGGAGGTCACAGCACAGCCAAGTTTGATGACTAGTCAGGGGATAAAG  
TTAAGTAGTACAATTGTGGCAGAAGAACAACAAAACAGTCTATAGATC  
ATACCTATGAAACCAGAATTCTTTCTTGTCTTCTAAAAAGGCTCTAGAGA  
CTAATCCAGAGGAGGAATTATAAAAATTGTTTGAACGATGACAGAGTCAT  
TGCATAAGCAGAAATAATCAGGGGATCTTGATTTACGATCTTTTTATGCT  
GAACATCTAAGGGCAAGTCACTTAAATTTTCTGTCTTATTTTTCCCATT

AAGAAATAAAGATGTAAAAACACATGATCTAATTAATACACTTTCGAGAT  
GTCTTCAGATAACTGATTCATGATCATTTTGGAGACGTGTTCTGGGTGTTA  
GAGGAAAAAACTCAGTGGTAACAATAAGACTATATTTAAATATAAC  
TAAATTGCTTTTTTTTGTGAGATAATTCTCCTATATCAATGTACCAGTGT  
GTGTGTGTGTGTGTGTGTGTGTGATGCTAACTTGGACCCCATCAAAGA  
TGACAATAATTGGTTTCTTTTACTTTATCTCTACCTTTCCTACTGGGAAAA  
ATTATCATGTTAAGAATCAGAGGAAGAATAATTTAAAAAACTATGTGTAC  
CTTACCTTGAGTAAATATCCAGTCCATTAAAGTAGAAAAACATGTTTAAA  
GGGTTTGGGCTTGAAATGATGTGGAAAAAAACAGACAAAAAGCATCTGTG  
ATTCCCATCTCATTAAATCACCGCTAAACCCATCTTTGTAGTCTATGTTTT  
AATAAGAAACCAAGTCAACAAATTTGAGAACTAACAAACGCAGTGAAATT  
GGCTGGTGAAATCTGATACATATTTTTTTCAGAGATCTTTCCTACTTTTAC  
ATTAAGGCACTTTGTCTACTTAAATAGTGTACAAGCATGAATGGTGCAAA  
AGAGTGAGATTGATATATATATTATTAGTCATACTTTATAGAGGAAACATTT  
TCCAGGACAGCAAATCAGATTCTGCTGTAAACACCATAAATCAAAGACAC  
TGTAATGCTGTTCAAAAACTGTCCCTTATGCCCTATTGATCGACTGAATAT  
TGTAGGGTGAATTAATTGCTTCCACAGGTGCTACCTTTCAGCCATCCTTA  
CCCTATGTTTACATAGACATTCTCACATAGTTTACATGTCAGTGGAAGAA  
AATATATTGTAGACTCAGTCTGTGAAAAGATAAACACAGCAGAGTTTTCT  
TTTCAATGGAACCACTTTTCTCAGATGTCTATGTGCACCCAGTTAAATGA  
ATGCACAGTTGATTAAATATCAAATTTCTGGGAAAGGTCTTTCAATTATT  
ATAAATTTAAGTAACTGGCATTTTAAAGATAGGGAGTGTATTTGGTCCAT  
GGAGAAAGAGAGACAGTTGATGGAACCTACCCTCATATTAACAGCACTTTA  
CTGGGTAGCATTATCAAGATAATTTTATACAAAAGACAGGAACTACTCAC  
TTTATTAAGCAAATAGTAATTTTCCCACTTAAATGGATGTGTATTTTCT  
GATTTACTCATCTACACTGATATTATTTTAGTTTTACGAACTTTTGAAC  
CACCACCGTCCCTATCCTATGACTCAGACGAGTACCAAGTGTACCTCCTC  
TTGGTAAATGATTAACAGTTAACACTTCAGGCTTAATTTATAAAAAGGGA  
AGGAAAGCAAATATTGTAATATTCTTTTTGAACTCATTTCCCTGTGATGA  
AATATTTAAAGTCCTGTTAAATGACATGATTGGGAAAAACAATGTTCCCTG  
AGATTTTAGTAGTGGACCTTGGTCCTGATAACAAATGTGTTAAAAAATCT  
CATGGTTTTTTGGACAAACATGTACAAATGTCTGGGCTGTTACTAAAAAT  
CCAACTGCTACCATGCATGTCTAAGAATAGAGTGCTTATTACTAATTTTT  
TTCATATATTGAAAAAATCTAAGATACATCACTTTTAATGCCCTGCCCAA  
TGGCTTAGAAGAGGATTTTTCTTTATTTTTTTCTCAAACCTAAAGCTTCCC  
CCCTGGCCATGCATGAACCTTTCTGAATTTCTTAATGATTTTATTCGATC  
TTTATTCTCCATGACAACTCTCCTTGACCTTTGAAGAATGGAATGGATCC  
TGTTGCTCTCGAAGTTCACCGTAGAAATTATAATATTTATATCTTGCATC  
TTCCCCAACTACACAGACATGTATCTGACTCCAAAAGAAAAATGCAAAGAA  
CAATGCCATCTTCCACATGATTTTTCATTCCAAATTTTTTTGTGTGATCT  
AACGTGCACTGAGCATGGCCTGCTGTATCAGAATAATGCATTGTTATTAT  
GATATTAAGACAAATATTATAAAATCATTTTGAACAAATGGTAATTCAG  
AGGATGGCAGTTGGCAAAGATAAGACTCTGCAAGAGATGATGTTCCCATG  
TCTCCTTTTCCCTTACACAACATATCTTAGTTTCAGCAGACAAATTTAAA  
AAGGAACTGGTGGGCAAGAGTGTATGGCAGCGAATAGGAAGGAAGATATT  
TAGACCTCTGTGTCTGGCATCTATTTTAAGTGTGATGTGATACCATTTCT  
GATCTAAAACCTGCTCTAAGCTGCTCTAAACTCTCTAAGAGTTTTTACTCCA  
TAAAGAAGAAAAACATAGTTCAGGCTGCAAAATCTAGCTTCATAAAA  
TAAGTCTACATTTTCCGTTAGTGCTATTTTCAGTGGTCTCTTAGATTTACG  
GTAAAGAAAGTGATTTATTGTCTTAGATTTTACAACACATTCAATACTC  
CACTTGCAAAGCTTTTGGTGGAAAAATAGCATATTACAATGATGTGGCTTAC  
TCAAAATGATTTCCAATTTCAATTTTCATCATCACTGAATGAGAATCTAATG  
GACAGTCACTGGTGAGAATATGTTCTCATATAACTCTATAATTCCTGAC  
TTCTAGGAATACACAGGCCAGTGGAGACTGGAAACATATACTGTCAATCA  
TGATGCAATATATGTCATATTATAGTTATAAAAGCAAAAAATGCCTTGAAA  
GATGAATAATATGCAACTAATACTTAGCAGGAGTATTAGGGAAAGCCTCA  
GGAGAAGGGATACATGAATGGAATCAGATAGCGTGAATGAGGATCCAAAA  
TAATCCAAAATACATTAGCAGACATTTTAAAGAGAAGGAAGAGCTTGAAAT

GCCATGGTATGTTTCATGGAATACAAGATAGTTTGATACGAGTCAAATAAT  
AGGGAATAAGCTTGTAAGTAGGCAGGGCATGCCAACTGTGGAGGGTGCTG  
AAGGTATCCTAAAGATTTATATCTAATCTTGTTGACTATAGATGTCTGTC  
TTTATGATATAAATATTTGCAGTTAGACACATTATGTGAGAATTGAATCG  
ATGCCAACAAAGTCCTTTTTCCACTATATCAAGTTACGTTACCTTAAATT  
ATGTTATTTAGTAGCAAAGCCACAATTCAAATCCAGGCATTCTGATTTAT  
TTTTAAAAATTAATTATTTGAATGACATTACAGTAACATAGATGAGATGT  
GATATATGTACATGTATTCTTATGTGCTTGTGGGGGTTAAGGTAAGATGA  
TAAGCTCTCTTTTCTCTTTACAAATTCTTGTAATTCCTTGAAAAGAGAA  
TTAAGAATTAAGAGAATTCTTAACTTCAGTGTGCAGGAGGAACCTATTA  
AACATCATATTTCCAATTAATTCCAGAGATTCTGTAGATCTGTAGATCTG  
GGACAAGTTCTGTGATTCTCCATTGTAATTAATAATGCCAGGCAATTCCG  
AACCAGAGGTTCTATGGGTCACGTTTTGAGTAATAATATTTTTAAGACTT  
CAACAGTATGATGCTATGTATAATGATACAAATAAAAAATATTTGTAATAA  
TCGAAATAAATCCCATAAAGATTTACCTGAGACTGTTATATAGTTTTTTT  
AGCTATCATATGCCTTGGAAGTAACAAAATTATAATTCTTAATTTTTGAA  
CATGAAAGAATAGTTCTGGGATCCCTGGGTGGCACAGCGGTTTAGCGCCT  
GCCTTCGGCCCAGGGCTTGGTCCTGGAGTCCCAGGATCGAGTCCCACATA  
GGGTTCCCTGCATGGAGCCTGCTTCTCCCTCTGCCTGTGTCTCTGCCTCT  
CTCTCTCTCTCTCTCTCTCTCTCTGTGTGTGTCTCTCATGAATAAATA  
AAATCTTTTTTTTTTAAAGAAAAAATAGTTATTTTTCTCTTTTATGAACTC  
CTGCTTCCCTACAGCCCTCCTTAACCCACACACTAATATCATTTAGTGAG  
CTTTAATTATTCCTTCAGGATTGTAAAGTATTGATCAGCCACCTCCAGAA  
AGATCATATTGTTGAAGGCTTAGATAACTATGATTTTCTTTCTTTCAA  
ATTGAAGATATCCTAAACCTGATTCAATTTGCCTAGACTTTGTTTCCTTG  
TAAACAGTGTGTTTTTCCCCGCTAACAAAAGTTAGATTTGCCATGGTC  
GTTATATGGTTACTTTGGCCTGAAAGCTATCCTAATTTGTCTAATATTTT  
AAAGTAATTAGAGAAGCAAGTCTAAAGATTAAACTTGCTAAATCTTGGA  
TCATGCATTTATTTCTTGCAATTTGATCTTGCAAGGTGATAGGTTGGTTT  
TTCTACTACTAGCTTATACATTGAAAACATAAAATCATAAAAATCTAAA  
ATGATAATGCACACACAAGTGCTTTCCTTACAATATTTTCTAGCATTTT  
AAAAGTTAATAACTACCATTATCACCAAAGTGCAGACAACCTCAATTATG  
TGACAATGCATTTATCATGTAGTGGCTGTCCCAGTAATTCCTGAATTTA  
TAAATGACATACTGAGTGTACAGTCAAGTAGAACTACCCAAAGTGAAA  
AATGGATGGAAATTA AAAAGTAGTTGTTTTTAACAAACAAACAAATGAGT  
TATGTGGTTTCATTCCACATGTTCTAATAGTAAAAATCACAAAGAGTTG  
TTTAATTTGTTTTTAATTTCTTCCATTTCAGTTTGTTTTTAATTTCTT  
CCTATTGAGACTAAATGTAATTGCATATGAAAAAGGCTTCCAAAAAGAT  
AGAACTGCCAATATTTTGAATTGCGTATTTCTGTGTCAGTGACACAGTAAGT  
AAGCTGTATGACAGGTATAAAGGTAGTGAAATAATTTGCCCGGAAAAGCT  
AATGTCATGAGCCATTTATTTATTTGTTTCATTTCAGCCAATATGAAGCTTA  
AGTGTCTTCTGTATATAAGATGCAAACACAAATAAAACATGATTCTATGC  
AGTGGTAGAGATCCTATGCACTAGGGAATAACTAGCAAAAAAGGCATGAA  
ATCTAGCCCTGGTGGGAAGGGGCAATCAGTTCGGGACACACTTAACAGAG  
GGTCTGTCTTGAGTGCATCACAGAATGTGCTGGGAGCTGTCCAGCCTCAC  
AGTAAGGGGAGATTACTTCTCCTTCTCCTGGCATGGTGGACAGCCCAAGA  
AATTGCACCCAGATAAGTCAAATTGCTTTCAAAGAAATGTAAAAAATTTT  
GTGTTGCTAAAGCTTAAAAATATCAGGAAAGATTGGCAAGGAGACTGGAGC  
TGTTAGCATTGCCTTAACTTGCAAAGGAGCTAGCAAATACAATTCCTTAAA  
GGGAAATTCAAGGTTAAAGAAGTTTGAGATGTATGGAGGAGGCAGGACA  
GTGGCAAATCTTCTGCATATCAGTGGAGATAGTGCAGATTTGAATTAAAC  
AGAGTGACAGTTATTCTGACTTTTTTAAGGTAACCAATAGGAACTAATTT  
GTGAGCTTAAGGTACAAATACTGTACATACTGTATTGCTCAGTGGAACCT  
CCCATTTTATAGAAAGTTTAGACTTGCCCACTTGAGGTTCTCCTCATTGT  
TGAAGGGGATTAAGAGGTAAAAAATAATCTCCAGTTATGAAATAAATAA  
GTCACAGGGATGAAAAGCACAGCATGGGGAATATAGTCAATAATATTGTA  
ATAACATTGTACAGTGACAAATGGTCCCCACACTTATCATGGTGAGCATA  
GCCTAATGTATAAAATTGTCAAATTACTATGTTGTACACCTGAAACTAGT

ATAACATTGATATCAACTATACTTCAGTGCAAAACATAATAAATAAATTT  
AAAAATGATCATGTGTATACACATATGTTTCGTGCAAAATCTCTGTGTTTCT  
TCTTTTACAGTGTTTTTGTCAATTCAAGTTGTTTAAGAGCCCCAGGCCTTT  
CTTTATCTAAAAGGAATTACTTCTACTTCCAAATCCCGAATAAAGGTCAA  
AGAGAGAGAGATCTGCAAAGTCAAATCTATTTGTGGTGCTTTTGCTTTAG  
TTATTAACCCAGGCTCGCCCTTGCTGATCTATACCCTTGTGAGAATAGTA  
ATAACGCTCACACAGTGTTCCAAAATGACAGTTTTTGGTTCACATTTTGA  
TGCTCATCCTTCTGGTTTTCTTGTCAGTCTGTTAGCCAGAAGGGAGGGTT  
TCAGAGGAGCTTTCAGTCTCAGCTATAAACTGCTGAAACCAATGCTTCCA  
AACACAGCTACATACTATGCCAAGACTAGCCACCAAGCTTAAACTTTAGT  
GTAAGTCTTGGAATAAACTGGAGATTTTTTACCTCTTAATCCCCTTCA  
GCAATGAGGAGAAGTCCAAGCAGGTAAGTCTTGGAAGACCAGCTATGAAT  
CCCTCTCTCTGTGAGTGCCTCATTAATCTTGGTATTTGTTTCTCCACC  
AGCAGTTCTCTCAATCAGGGCCATCCCATCAGGCTCCCGTACCCAGAAAA  
TTTAGGAAGTCAAAATTGAAAACTTGGTGACGTCAATATATACTAAAGAA  
CGTATTAATCTTCAAACCTTTACTCTTCTCATAGAATATTGGCTGCTTAGA  
TGTATAATGACACAGAAAGGATAAAGCTTTTACAAATGACATTTGATTTT  
GGTCCAGATTTGAGTATTGTTTTACCCACTACTAACAACATATACCAATAT  
GTATCATTTTACTTTTTGGCAGTGTGAGGAAGACACAGAGCAGATAAATAT  
CTCAACAGAGAAGTAGGATTACATCTACAGCATCCTTTCACCTTTTCCAT  
ATACCATAACCTCGTCCCATGAGTGAAATCCCATCATACCTACACTCAGG  
AGGAGAGGATAGTTTGGGAGGGAATATTCGGAGCCATTTGAAAATTCTGC  
CTACCATGATGTTAAATATTTATCTACAGCTTTATCTCCATCTGTCTGTT  
TCTGAGCATCATCAATCGATTCCCTGCTAGAAGACAATGGGATAACTTGT  
ACAGTTTCTTTGTCTGATCTCTCCCATTTCAATTGTTGTAATCATTTTAA  
TTCATCAAGAGTTTTTTTTTTAATGTTACCTTTATTCCTTAGCCATAATG  
CCTCAGTTTTTTACCCTAAGTTCTATAGTTAAATGGAATTAGTGCTTACCA  
GGAGATTTTTTACCTAATTTTTCTCTGATAATAATTTCTTTATTCTTTTT  
TTTAGCAGGGAGAGGCAGAGGGAGAAGGAGAGAGAAAAATCTGAAGCAGAC  
TCCATGGCCAGCATGGAGCCCTGCTTGGGGTTTGATCTCATGACCCTGAG  
ATCATGACCTGAGCTGAAATCAAGAGTCGGTTACTGAACCCACTGAGCCA  
CCCAGGTGTCCCTAATTTCTTTATCTTAATCTCTTGGATAGGTGGATATT  
AACATCAAGATGGATGGATAGATAGATAAGTAGATGATAGATAGACGACT  
ATTTCATTTTGTCTTCTTTATTAAATGACTCTTTGCCGGTTAAAATATTC  
TTGGTCACACCTCGTTCTCTCTTGAACCTTTGTAGACAGTGATCTAATGAC  
CTCTGGCACTGAAAGTTGTGGGGGCATCAAAAACCTCAGTATACTAATGGG  
CAGCCTGGGTGGCTCAGCAGTTTAGCGCCGCCTTCAGCCCAGGGCATGAT  
GCTGGAGACCTGGGATCGAGTCCCACGTCAGGCTCCCTGCGTGGAGCCTG  
CTTCTCCCTCTGCCTGTGTCTCTGCCCTCTCTCTCTCTCTGTCTGTCTC  
TCATCAATAATTAAATAAAATCTTAGAAAAAAATTAGTAACTGATTCT  
TGGGCTTCTCTATTTGTGTTGAAACCTATTCTTTATCACTGATATTCAA  
AACTTAACCAGAATATGTTCTAATGCCAATATCTCATGTTTTTTTTTTT  
TTTTTTCTTTTCTTACACATAGAATGAAATGTACCATTCCTAGCTGAGG  
ATTCATTTTTCTCCTTGGTAAAAAGACAATCACCTATTTTCAATACTCA  
GAATAGTTTTCTTCAGCTGCATTTTTTGGATGCTTTCTATTGAGGATGCCA  
AGCATTTTTTACACTGGACCACTTGTGTCCATTCTGCACTACATTTGCAAC  
ATGGACGTTAGGGTTTTGGTCTGTTTTGTTTTGTTTTACCTTCATTCCAT  
TTTCGTAAGACATGGGGGTGGGTGTAGAGGGAAATCCTTCAAACTGCTT  
GAGTTTTTGTTCAGGGACACTTGTCTAGTTTTTTTTTCTGAAGTCTGAAC  
ATCCTGTGCCACAGCTCATGGCAGACAGTCAGGACTGCATTCCATTCTCT  
TCAGCTATGGTTCAGTCTCTCAGGGCAGGGCAGTGCCATGTAACATGGTC  
ACTCCTGACAGCCATTCCAGTCACTGTTGTAGCCTAGTGATAGAAAGTAG  
AGTGAATCTACTTAGAAAGCTTCTCTTGGCTTTCCTCTAAGGCTGCCTAT  
CTGTGCCTTTCTCTCTCTCTCTCTTTCAACTATTCTCCTTTCTATGAACC  
AAAACCTCTAAATGAAACATCTCAGGGCACCTGGGTGGCTCAGTGTTGAA  
TGTCTGCCTTTGGCTCAGGTGGTGACCCAGAGTCCTGGGATTGGGTCCC  
ACATCGGGCTTTTCGGCAGGGAACCTGCTTCTGCCTCTGCCTGTGTCTCTG

CCTCTCTCTGTGTCTCTTATGAATAAATAAATAAAAAACATTATTTTTATT  
TATTTGTTTTTTAAGAAATATCTTTCCTCTGTACTGGGTCTGGAATTTAG  
GAAGCTGCTGTAAGAAGTTATCAGACTCTTCTATAGCTTCTTTGACCCC  
TCCCCCTTCATTTTACAAGATTTGCCTAATCATGTGCATATCCTTATTGGC  
TGCTGGCATTTTTGGTGTCTCCTTATCCGTCTTTTAGCGCCTTCAATCCA  
TTTCACTGGGTCTTGGAGCCTGCTACACCCCACCATCTTCAATGGTTGAT  
TTTCATGATACACTCTTCATTTTCAAATGTTCCAAATGTCCTTGCTGGG  
AAAGAAAGGAGCTCACTGATTTTTGTTATCACTTTCTTCTAAATAGTCA  
AGGAAGCATTCATCTAAGGCCATGCTGCCTGTTGATTTGTGCTTATTGTA  
TTTAAGTTTCTAATTCTCTGACCATCTTATCCAAGCTCCTTGCACTCACT  
AGATGTGAACCTCCTCCATCCTGTAAGCTCAATTTAGGCAAGGAATATAT  
ATGTTTCTGCTTACTTAGCACAGAGCCTGGTATAGAATAAGCACCCAATA  
AGTAGTGCTGGCTGAAAGAATAAATAAGTAGGTGAATCCCTTGTGAATCC  
TTGTCATCAAAAATAAATATTAAATTTTAAATATGTTGAAGAGCAAGAT  
ACTTTCATTGTTAAGTTTATAAAAGAGATTTTACAAATACTGTTGCACTT  
TCTTGCACTAAAAGAAGTGTCAAGTTACAATAAGTGTATCTTCCTGAAA  
GTTGAATAATCAGCCGCGACGCTAATTCACATTATCTCCTCAAGCCACCT  
GACGATAATTACCTCAGTGATAAATTTGACTGAAAGAAAATTGCTCTCTTA  
TCTGGAATTTAAGTGACTGATAAAGAATTAAATGCATTTAAATAGAGAAT  
TTATTCTTCAGCACCCCTGATACTTTGACCACTGAAGTGCCCATGCCATGT  
AACAAATCAGTGCCCCCTCCCCAAAGCAAGGGAAGGCTTTACTAGTGATC  
CTTTAACCAATGCAAGGTTTTTAAACCTACCCGTTTATAGCCCAAAGGAC  
ATTTACTAATATAAGTGATAGATGGCTGAGTTGTTCCACTAATGATAATA  
GCATTTATATATGTATATTTTAAATTTTATTTATTTGAGAAACAGCAAAG  
AGCACGGGCGGGGAGGAGTAGAGAGAGAGGGTGAAGCAGACTCTCCACTG  
AGCAAGGAGCATTTATATTTATTTTTAATGTAAATTATTTAATACGTATG  
TTTTAAAATATAGATTTAATTTACTTATGAGTATACTTAATAGGAATTTG  
TCAAGTACCTATTGATATAAGGGAATGTGCTGAACACATAAATAATGTAA  
AACAAATGAGTAATATATAGCCCTTCCCCAAAATGTGCAGCTTAAGAATA  
TGTTTTAAATAGGTCAAGGTAGCCTTCTGTTGAAAATCTTCCCCAGCTTA  
ACAACCAGGCAAACACCATGTCTCTGTAGAATACTTTGGAAAATTTTCT  
ATTCTGAGCATCCCTCTTCTTCATCAGGGAATCCACTCTACGTTCCCCTA  
TCACTCTCATTAGCCTAGACATACTTTCATTTTTAGCTTGTATGTTGTCA  
TTATTTATATTCATTAATTCTAGTATCTGTCTTTTTCTTGATGTTCAGAA  
TTACTTTATACTAAATATTGGTTGATATGTTTTCTTCTCCTATGGGACCAA  
GATTTTCCAGTAAAGTGTCAATCTTTACTTAAATTTGAATTTCCAGAGCC  
TAGTTGCTTATTGAAAAATGGAAGAAACCATCAACCAGTCAATCAATATA  
CATAGTTAAAGGTGACATGCTGTTGTATTTCTGCTCCCTTTGCAAAAACA  
ACGTATCTGCAAAAATGCCATGGGCCCGAAAAGGGACAAGTGGACAAATA  
TATCATAGTGATAACATTGACCATCATTTTGAATTCAGATGAGGACTTA  
TGGGATGTTTGCTAGTCAGTATACATATGAACCATCAGGAACCTTACTTA  
ACGAGATAATCTAACAATTTGTAGAACTTCCTTGAATCTCAAAATCTCT  
CCTTTATACTTTCCACCTAATACTGTCAATATCTCAACAGCAACAAACAA  
ATGTGTGCTGTGTGCTTGCACATCAATGTCTATTTGGGTAGAGATAGAGT  
AAAAAGACAATCTGAGATGAAGTTAGAGTCAGTATACAGACCTTGAATCT  
GGCGTTATAGTTAGTAAATGCTTTAATGTTTCATCTATGCTGGTGATAATT  
CCTCTTTCTTCTGTGTCTCTTATAAAAGAGGTTAAATCTATAAGAACAA  
GGGAAAAATACTAACATATATAATATTAAGTGTGGGTGCTATTAGAAGTC  
CCCATCCAGGTTAATGTCTGGGTGTCATATGCAGTAGTTATGTGGATGGA  
ACCTTCAAAATCAAAGTTCTCCATTTGTTTTCCATAAACATTTATTCAATTT  
AAAATTTTTTAAAGATGTTACTTATTTATTTATTTGAGAGAGAGAGAGA  
AAGAGAGAGAGAGTGAAGAGTGCATGCAACATGGGCAGGGTGAGGGGC  
AGAGGGAAAGGGAGAGAGAGAATCTCAAGCAGACTCCAGGTTGAGCACAG  
AGCCCAATGTGGGGCTCGATTTACCACCCCAAGACTATAACCTGAAGGG  
AGTTGGATGCTTAAGTGAATGAGCCACCAGGAACCCCTCAATTTAGAAT  
TTGACTAGAGGACAACCTGTCCATGAATGTCACTGGGAATTTTAAATGAAA  
CAATATTTAGCGTAATTCAGGAAAGAGAAGAGTTAATAAACCTTACCAA  
TTTACATGTCCTCTCTTTCTCTTTCCCTCTCTTTCTCTCCCTTGCTTCTT

TTCTCCAGCTTCTCTCTCTCTTTCTCTATTTCTCTGTTTCAAGTGTTTA  
TGGTGAGAATTAAGTATGACTATGAAGACTCTCCAAACAAGCACTGGTCT  
GAGGAATGAGCTTGTTCCTGCTCCATGGTGATGAGCACAAGGAGCCAGC  
AATGGGTAGATGGGTAGGTAAACAGGTATTAATCTCCAGAGTCAAGTCTC  
ATTCCAAATATTCACCTAAGTCCAGCATTCAATAAAGTGTGGATCTTGAGA  
TAATAGTGCTAAGCACATAGATGAGGTTTAAACAGGTGCTCACAATACATT  
TTTTTTTTTCCATTTTAGGAAAACCTTAATCAAATAACAGTTTTTGGAAGA  
ATTCCACATTGAGACTTTCTCTCTGTATAGGTAATAACATAAACTTTAGA  
GATTAATAATTTCTCAGATTTACATACCAATTATATCATTTAGATGAC  
TTTTGTAATATTATATAAAATTCATTTTATCAACAAAAGGTGTTGAGACT  
TCAAACACATTAAAACTGAGAAAGTATCTCAAACCTCATCTCTATTTTGG  
GGCACATGGGTAGCTCGCTTCATTAAGCCTCTGACTCTTGATTTTCAGCTC  
AGGTCAGGATCTCAGGGTGGTGAGGTTGAGCCCCTCTGTGTCCATGGCAA  
TGCATGGAGCCTGTTTAAAGAGTCTCTCTCTCTCTCCCTCTGTCCCTCT  
CCCCACCACTCATACACTTTATTTCTTAAAAAAAAAATCTCTATTTTGA  
CAATCTTTTGCTTGTGATAAAATTTTCAACACAAGGCTCTCCTTTTGTGC  
TTTCCCAATATGAATATAACTATTTTAAATACATAGCAATATAGTAATAA  
ATAATCTTGTTCCATGCCAGGATAAATTTAAATTTTAAAAAATTGGAAAA  
CTATTTTATTGCCTCCTGTTTCATCCAGCTGCTGCTTGAAAAATCCAGAT  
CATAATCATAATCGCTTTTTCTTCCTTTATAATCTGGAGAAACAATACTT  
CCCCTCCATTTTCAGTCAGGTAATATGAACCTTGAACCTTGGCAATGGCTAG  
CAAGCCTTTTTGTTTATTATGTCTGTACTTTTTATTGGAGATGATGGAT  
TAGTCCAAGAAATGTGAATTTTGTGATAATAGCCAAGCTTCTCTCGGAGC  
TATGTTCTTTCTGATCTCCACTTTCAAATACAACCTGTGTCTCACTAA  
ACCCAAAGGACAACTGCTTTTTATAAGGCTTGTAAGGCTAAATTTGCTC  
CTTAAACAACAGGCTGAAGCATACTATTTTATATACGTTATCTGAGAAA  
TAAGTGAGAAATAATATGTACTGTCAATAAGATACTTTTTTTTTTCAAAT  
CAAAGGCTATGAGAAGGCCAAGTAAGCCTTCCAGATTATATATATATATA  
TAAATAAATCCAGTCCCCTAACATTCTACAACCTAAATCTACATTCTAC  
ATCTTCTAGCAAACACTCTTCTAACTTTTGGCAAATTTTCAGGATTACAC  
AAGTCTGTGATTTTTCAAGGAAAAAGGTCCTAAAGCCTCAAATCCTCTAT  
TCTCCAGTTACATGGATCAAAAAATAGGTAAATATATATATATATATGA  
AATACAAATAATTTAAGGAGAAAAATAAGAGAATGTCTAAATCATAGAGGT  
ATCTAATAAATCTATATTCTAAATCTTGATACTGGAATATATATTTATA  
GTCAAATATTTATTTTCCAATTGTCTCAGATTTCCATTTACTTGTACAG  
TAAAACAAAAAGAAAAATAATTTCCACAACATTTTATTTGCTTAGATATT  
AGATTTACCATAAAACAAAGGGAGACAGGCAGAGTCCAAGCTTTCCAGA  
ACAAAATATCTAAAATATTGTTTAAATAAAATTCATGCAACTGGCATTG  
ACATTAAACAAGAATCCACTGTAATCATTTTACATGTATTTTATTTAAT  
TTTTCTTTTGCTGAAATTTAGTAACAAAATGTGTTGGGGGATTTTGCTTT  
TAAGTCATTATGATATTATTGGCTCCCAAAACAGAGAGCTACCAGTAAAG  
CAGGTAAGATATACTGAGAGATTCCCTATGTCCAAGGCATGTTAGGCATAG  
AAAAAAATTAGGAAAAGATTCACAAAAAAAACCCCCAAAACAGAGAAGGCA  
TTGTTTCTGTCCCCAAAACATGCATAATGTATTTGTTAAGACACACATAT  
GCACATGAATAAGGATGCAAGAAAATGTTTAAATTATGTGTTGCAAAGGT  
ATATCTTAGCCTGACTCTGACTCTAAAAGCCTGTTTTCGGGTTTCATCAT  
GAGACAAC TAGCATGGGTATTTTATAAGTTATTACTAGTAGCAGAAAACA  
CAAGTCCATTTCCAAGAGCACAGGGTGGGAAGGAGATGGGAATTGAAGTG  
TCAAGTCAGATGTTCTGAGATATAAAAGGAAGGTAGCTGAGGGAGATAAT  
GTGATTCAATTACACAGAGTTCTATTTGCATAACATATGTTAAATATAGAA  
AGGGGTGTTGTTTTGGTTTCAAATGGCAGACAGAGTATGTGCTACACATT  
TTGAAATAAGGAAGGAAAGATTTGTGAGAAATGTCTGGAACACTAAAATT  
CTCTAGGGTAAAGAAGTTTGGAGAAGGAGAGGCACAGAACAGGATGAACT  
TTAATGGGCAAAGATGCTGAGAGAAGGCACGAGGAACAGGAGGTCCAGCA  
TCAATAAGAGGGTTTCAAGCTAAGAATCCACCTTGCTTACTGGCTATCCCA  
TTCCCCCTGCCCCATTAGCATTATGGACCAGGCAGTAGTGTTGGATTTG  
TGCACATGAATGCAGTCAGTGATTACAGAAGCTTGGTTGAGAGAAATAGG  
GTAATTGGTGAACCTGAGAAATAGAAAGTTCCCACATGGATGGATTATTC

TCCCTAGATCCCCACCCACAGCACTGTCTGCATGGCCCATGCATTGACTA  
AAAACATAAAAGAAACTCCAGTGTCGCGAGCTGCTTTGAGTCCTTTCACAG  
GAAGAGTACAGAGCAGAGGGAATGAGGCTCGGCTATCTGGAAGGGTTAGA  
GCACAATCCAAAACCACTAAACAGTTGCAGGATGCAAATAGCATGAGGGA  
AAGGCTAAACTCAACAACCTGGGGTGAGGGAAATTTTCACCAGAAGAAAGA  
TAATTTGTAGAAGGCTAATTATATGTATATAGATATGTGTACAGTTGCAT  
ATGTGTATATATACATGTATGTATGTATATGTATGTATATATATGGCTTT  
AAGTAAGATATGTATAGTCTTTGGCATAAAGTCTGTTTTTCGTCTGATCCC  
AAACGAGCTGTTCTTGCTTTCTTTTGATTTCTTTTTTTTTTTTTTTCCTTTT  
GATTTCTGCTTGCATGGAATCCCCTTCGCCACTTCTTCACATGATGTTGT  
TATACCTGATGGTATCTGGAATCGATCATAGCTTCAAATTCCAAACCTTTG  
CTGACTCCTAGCTCTCTCATCTTGGACAAATTAACCTAGTTATGCCTCCA  
TTTTTTTTCACTTATAAAATATACCTTTCTCATTCAGTTATCGAGAGAAAC  
AATTGTGTGAATATGTGTGGAATGTTTAGAAAGGCATAAATGTAGCATAA  
GGGAAATGTAAATGTTAACTAACATTATTACAAAGAGCGAGTCGTAAACA  
TCTTTTCATGCCTCTTCTGAATTTTCATGAGTTTCTGATAGAGCAGAAT  
TAACATAGAACACATCTGCAGCAAAAGCTGTAGGATATATTATGAAGAGC  
AAGAAATAGTCCATTTAAAAAGATCTATTTGCTTTTTGAGTCTCCCTGGG  
TTTCCATGGAACCCATAAATGCTATTTGAAAACCTAAAAAGGTGGACGCC  
ACTCCAAAAGATGAGAAATGTTCTTTTTACCTACAGATAAATGGGAAAGT  
ATTAAACATGTATTTGTTAGCTAAATTAGGGTAAGGACTTTGTAAGAACA  
GTAAAAGGTTTGCAACTAATTAGGCTCATTTAAATCCATTACTTAGCTT  
TTAATTAGGCACAAAGAGACGAGAGAATGAGACTTCTTTGTTTTCTAATT  
AAAAATGAAATTTGAAATTTGGCAGTGCCAGAAAACCTTGACCTCCTAGAAT  
GTTTTATTTCATGGCTTTAAACCAGATTTTTTTTTTTTAAAGCTAGACGTT  
AAAAAGTATGGTAAATCAAATTTGATGTTTGTCTTTACTAAGAAAAAAA  
CATTTTATTGTAAAAGTGAACCTGAAATCACTAAGTGGCATTTTGGAAATGA  
GTGAACTTTTATCAGTTAGACCCCCAGTGAATATAGAATGATGGCAACAT  
TGCACAGCTGCTTGATTTCTGTAGGAAAAAAAAAAGAATATGAAGAGTCC  
TACTAATGTCATGTACCATCAATTTCTTTCGCATTAATTTAAGAATGCTT  
AGTTTTCTAATGCTCAATAAAAAAGATTTGTATTGCAGATCATTCAAACCTA  
CATATTCACATATTTGTACTCGTCTTTGATTTGATTAGTATTTGTCACCA  
AGAAAAATCTGTTGAGTAATGTTTCAGTTTCTCTCTTCTCTCTTTCTCT  
CGCTTCTCTCTCACACATGCACGCACAGATACTCACGTGTTTAAGAAAA  
TTACTCAGTCCTTTTAAGATTTTGCTAAATCCTCTTAACTCTTTCCACTT  
ATTAAATGACTATTAATTTTCAGGTTTCAAACTAAATAGACTTTTATTTG  
ACATCTTTAGGCTGCATTTATGGGAAAAGGTACAAAGAAATTTAGACAG  
TAGTTGCTGTCAAGTAACATTTTGTAAATCATTTCATGTGATTCCTTTAAT  
ATGCATCTATTCTTGAGTTGATTTTAGGTGACTCTGAGTCACTTCTGTTA  
ATGTCAAAATGAGGGCTGAGCCCATGAATTCTACTTCATTACACACTGAG  
TCTGTGACATATAGGTAAACTCTTTTTCTGGCTCATTTTGTAGGAGATC  
CTCATGATTGAATTATGACATACATAAATAAAATGTACAGATTTTAAATT  
ACAGCTTGGTGTATTGTACCAGGTGAACACACTGAGTAAGCCCCAAAATC  
AAAATATCGTAATCACTGCCAATACCCCCAGAGCACTTCCTCAAGCCCCCT  
CCCTCACCAAGGGAAAGTAACCATTATTTTGACTTCTGTATCAGAGATT  
AGATTGTTCTGTTTTTAACTATATATAAATGGAATCTAACAGTGTGTAC  
ATTTTTCGCTCTGGTTTCTTTAGCTTAGCATTATGTCTCTGAGATTAGTC  
CATGTTGCTGTGTATAGAGTCATAATTCATCGTCTCTGTATAGCAGTATA  
TTCATTTTATACCAGATGAACATTTGTGTGTTTCTAGTTTGGGACTGTTA  
TAAATAATGTTGCTACAAATATTTTAGGCATCTTTTTGTGGTATATATG  
GTATACACATACATATATGGAATTACTGGGTCTTTAGAGTAGGAACATGT  
TCAAATTACTTAGCTACTATCAAATAATTTCCCCACGTAGCTGTACCAAT  
TTACAATCCCACCAGCAGTACATGAACTGACAATTGTCATTTTTTTGTCA  
ATTTTATTTAATTTTAGCAATTATGGTTGAGTTATATTTAATTTCTATT  
TTTCTCATTATTTTTTAGGATAACTGATAGTATGAGTATTCATGTACTCAT  
TGGCATTTTTTACGTGTCCTGTCCATTTTTTTGTGAAATATGCTCTCAAC  
ATTTTAACTCTTTCTAAAAAATAAATAAAATTGAGTTGTTACTTT  
TGAAATGATTTGTAGGAAGTATTTCTATATTATTCATATATTAAACATCT

CTTTATATATATATTTAGATATGTATTGCCTTAGTCTATACCTTGCATTT  
TACTTTTAATACTATATTTTTTATTAACAAAGTACTTAATTTCAATAGAG  
TTTCATTTTCACAATCTTTTCCTTTATGGTTAGTGCTTTTCCTGTCCTTTT  
TATGAAATAGTTGCACATCGTCAAGATGATGAAGAAAATGTTATCTTCTA  
GAAGTATTTTTGATGACTTTTTTGAAGTGTGAGATATGGAGGGGTCAGAG  
TTTGTGTGTCCTATGTGAATATAGAACATAAGTTGATCCAGTGCAGTTTAT  
TGGAAAGACCATTTCCCCCTGCTACTTAGTGCTGCACCTTGCAGTAAAT  
CAGTTGCCATTTGTGGGTTTGGGGATTCTTTATTCTGTTCCATTGGTCTA  
CTTTTCCTTTCTTTGTACCAATACTACATGGTGTTAACTCTTAATATGTC  
TTGGTATCTTGTGAGATGACTCATTCAACTCTGTTCTACCAAGTTCTTGG  
CCTGCTGAATTTCTTTGTAAGTTTATAGGCTCAACTTGTCATTTCTGTAT  
AGACATGCAAAGAAAACCTGCCAGGACTGTGATTGGGATTGTATTAAAT  
CTATAGATCCCTGTGAGGTAAAATACATCTTTACAATATTTAATTTCCCA  
ATGTAGGGACAAGTCATCCTTCCATTTACTTGGGTCTTCTTTAATTTCTC  
TGAGGTTTACAGTTTTCTGTATAGAGCTCTTTCACCTCTATCAGGAGAGA  
TTTTTTAATTTCTTTGATGATTTTTTTTAAAGATTTATTTATTTGTTTTAGA  
AAGAGAGAGAGCACAGGGGGAGGGGCAGAGAGAGAGAGGGAGAGAGTGCC  
TCAAGCAGGCTCTGCACCTAAGATCAGGACCAGAGCCAAAACCAAGAATC  
AGATCTTATTAACCATGCCACCCAGACACCCCCCAAATTCCTTTGATGGTT  
TTTAATATATCATAAATATTGTTGCATTTTTTTGACATTTTCATTTTCTAAC  
CATTAGTACTATATGGGAATATAGTTGTTTTATGTTGAATTTTGGTTCCA  
AGAATTTTCAAATTCATGTATTAATCTGTGTAATTTACCTGAAGGTTAG  
TTTGAACTTTCTTTCTCCTGAAAATAAGGATTTATTTTTGCTCTCCCATT  
CTTATATGTTTACACATATATATCTATGTATGCATGCATTGCTTTACTGT  
GCTTTCAAAGACCTTTAAGATAATATTGAACAGGTGTGGTAACAAAAGAC  
ATCCTTGTCTAGTTTTTTGATTTTCAGGAGATGAATTTCTAAGAACATGGCA  
CTAAGCATGATGCATGCTTATAGGTTTTTGTAGGTAACCTTCACCAAAT  
AAGAAATACAAACAAAAAAGCAAACAAAAAAGTACTTCTGTTTGTTC  
TAAGATTGTCAACACTCCCAGTGAATTTAAATAACAACAGCTGAGTAAAT  
GACAAAAAAAATGTATTTCTAGAAGAATCAGAGGACAAGAGAAACAATG  
AGGAATACAAGAACTAACATTTTAGAGGAAATAAACCTTTCAGAGGTGG  
AAAAGAAAGAGACCTGTGGCTGTCTCTTGCAGGTGGCATTGACATTTCAG  
AACTGGTAACAGTTGAGAATACTGGCCAGGTCCAGAAAGACTCCCCTCAG  
GGAATATGAAGTCAGCAGAACTATTAGTGGTTGTGTGGGACTAGAGTGAT  
AAAATAAGACATTTGTGGGGCTGAAAACACAGAGGCAGGAGGCTAATTAA  
CTAAACCAAAAAATTCTGAAACAGTAAAGATTCTTACCATTTCTTAGTGT  
TGGAGATACAAAGAAACCTTCCCAAATCTCAGTTAAACCCCCAAAGGG  
CCATGTCTTAGGGAGTAAGGGTAAACCAGAGGCAGAAAGAGTCCTAAGTA  
CTGTACCCAGCTTGCTGAACTCAGTCTCTCATTGGGTAAAGTGATGGGC  
TTCCCAGTCTATGGGGGAGACTGATGGAAATTCCATCATCCCATGCCTCC  
ACTTTTTTTGTAGTAAATGAACAACATACAGTAAGAAATAATTAGGTTTG  
TGCAATAGAAGCATATGGCCAAGGTCAAAAACCAAGAAAAAGGACTTTGT  
GATACCTGTAATTAATCTACTCAAGAGAATAGAGAAAAGCAAGAGAAAA  
AAAATGGAGAACTCCACAGAAAAATTTGAATCTATAAATTAGATTAGAGC  
AGCATTTCTAAAACGAAAAAATAAGACCTATGAAATGAAGAACACAAAAGA  
TAGGCTAACAATGGATTGGACAGAGAAGATGACAGGATTTCTGAACTGGA  
GATCAGGTCTGTATAAAATATACAACCTGAAAGAGAGAAGAACTGAAGGA  
AAAAAATCATAAATACACTTAGGAGATGGGGGGAATAATGTAATTATATT  
GCTTCTTCAGGCTCAATGACCATAGTTTGAATATTTAAATGATGCCAT  
TGTTTCAGGTAAACATTAATAATGATTGTTATCTGAAATATTGCCATAATTAT  
TTGAAATGTGCAGTAAACCTGAGTTCAATCCCTTCAAAATTTATAATCAG  
AAAAAGTTTTAAGCTGAACAGGATCACAAGGATGATTTATCCCAGTCTCCT  
TCATTTTATTTATGAGTTCTGAAAGGATTAAAGACTTACCCGGGTGGTT  
TTCTATCAGATAATGCTTTAGTTTTCATTACATTCTATTCACAGGCACA  
CCATCAATGGGTCTGCTAACCAACATGACCAATTAGTTGGGGGGAAGAA  
CTGAATACTTTCTTTTTCACTCTGTAGAGTATTCAGCTGTGCACTAAAAT  
AAGAAAGAGAATACTTTGGCAAACAGATTTCCAGTTGACTTGGTTTATCT  
AAATTGATTGAAAATAAAAAATTAAATTAAAAATGGAAATTTTACAATATA

TTAGTTGGCCTTTGGAATCTGCAGCTTTGCTCTTGTGCTGTTAGATATCC  
ACTGTCATATCAACTTTTCTGATCCTGTTGAATTTCCACCTCATTTCTC  
ATCCTGTTTATGTGTTAAGTCACAGTCTTAGACACTCAAGCATCTATCTG  
ATATTGCATTGTCACCTGTCATCTCTTTGTAAAGTCAGAATGCACATCCT  
AGCTCCATCCTGTACAAGCCATTCAATGTGGGTAAATTAGCTAATCCCTC  
AGAGCCTCAGTTTCTTCATGTGTGAACATAAGAATAATAAATAGCCCCTAC  
TTAATTAAATTTTGCCTTACTTGTATGATTCTGTGTTTCTCAAATGTACC  
ATTTAGTCAACAAAAAATACAATTTGTGAATAAATAAATAGTTCCTATCT  
AAGGCAGGTGTTAAAGGCAGTGAAATCCAAAAATTATAGAAGTAAACCAC  
TTAGACCAGAGAACAGCAAATATATATAACCCATGGGCCAAATCCAGTCA  
TCTGCTATCTATTCTTCTAAGTAAAGTTTATTGGCATAGCCATATCCATG  
TGTTTACATGTAAAATATGTCTGCTTTCCTACTGCAAAGGTAGCTACAGT  
TGTAACCTGAGACTGTGTAATCCACAAAATAAGAAATACTTAATATTTGGA  
CCTTTTACAGAAACAGTTTGTCTGCCCTGACTTAGAATATTGCCTGACATAA  
GGGTGAATGTTAATTATTGCTATAAATTAGCTCTTTTACCAACCAATACA  
AAATCCAGAGTTTATTATTTCTCTTAAATTCTTATTTGTAAATTTAATCG  
CCATTCAAGAAATTCATTAGATACATGCAAATTTTAATGGATTTTACATT  
AAAAGAGCATTTTGTGCAGAAAGCCCAATTTGCTGGTACAATTCTTTTTCT  
GTGGGTGAAAACAAATTTCTGGTATATTATTTTGTAACTAGAGAGTTGTA  
ATTTTGCACAGCTGGAACAAATAGATTTTACATTGGGGTTAATGATTGAA  
GGGTTTATTGAAAATTATGTAGGCTACTTTGAGCTACTGAGAGTGGACTT  
CGTTTTTACCAATATAAAAAGGCATAAGCAGTTGCTGTCTATGGCAAAAA  
AAAAAAAAAACACAGAGAAAAGAGAAGTATGTTTCTTTCTACTTGGAACATA  
ATATTATATATAAAGGAAGGATTAGTTAGGAGATGATGACTGGACAAAGC  
TTGTCTAACCAAGAAGCTTCATAAATCCGTGGTTTCTTCCTCATGCTATT  
CCTGGAAGCAGCCTCTTAAAAATTGTTCCCATGAAATGTTGGATCATAACC  
AATATGAAACCATCAGAAGGGTTTATTGTTGTAATAGTTAACACCAACAA  
TAAGTGCCAAAATGAGTCATTAGACATCTGTATTTACATGCTAAGGGAGC  
ATGTCTTAGTTTTTAGATCCAACTCAAGGTTGTAATTATTATACATGAG  
TAACCATTTCACTCAGGAAGGACATTTTGTACATACTCAATAAATAATTG  
TTTATTGAACAGCAATTAAGTAATTTCTATTGCATAATAAGGAAATCTGT  
CTAGATGAGAAGGAATTTAAATAACTATAGACATCTATAATGATTCTGAC  
ATAATATATCAGCATAAAAAGGGAGCATAGAAGTTATGACAGATGTTATAT  
TGCTCTATGATATAATAACACAGACCAAGAAATAAGCAATAACACTTAAA  
AAAACAGCTATGAGAAATAATATATAGTAAAAATCAGAACTCGGTGATTA  
ACTCAAAGTGGAATGATGGATAAAAGTAAGAAATCAGGGATCCCTGGGTG  
GCGCAGCGTTTAGCGCCTGCCTTTGGCTCAGGGCACGATCCTGGAGGCC  
CGGGATCGAGTCCCACGTGCGGCTCCCTGCTTGGAGCCTGCTTCTCCCTC  
TGCTGTGTCTCTGCCTCGCTCTCTCTGTGTGTTGTGTGTGTGTCTCTC  
ATGAATAAATAAATAAAATCTTTTAAAAAAAAGTAAGAAATCAAAGAATC  
TCTCATTCCTACTGTGTATGGAAGAAAATATATTTAATATTATCCAAATA  
AAGGATGGTCAATGTTTTGAGAATTATGGAGCTCTCCAGATAAATTCAGA  
TTCAGTGGAGAAAAAAGAGTGCAAGTCTGAACCTTTGGAATTTGAAAGAA  
GGATATTAACCCAATAGACAAAAATATTGAAATACCCATAAATGTCTGTTGA  
CAGATGAATAGACGAAGAAAATGTGATATATGCAATGGAATATTATTAC  
CCAGTAAAAGAAGGAAATCCTTCCATTTGTAGCACCATGGACAAACCTGG  
AGGATATTACAGTATGTGAAGTAAGCCAGACACAGAAAGACAAATGCTAC  
CTAAGCCCACCTTATATGTGGAATCTAGAGAAGTCATACTCATAGAAGAAG  
AAAGTAGAACAGTGGTTGCCTGGGGTTGGGGGTGAGCAAAATGTGGAGAT  
GTTGGTCAAAGGATACAGACTCTCAGTTATGAGATGAATAAGCTCTGGGG  
AATCTCCTGTACAGCATGGTGACTTTAGTTAATAAAGTTGTATGGTAAAA  
AAAAAAAAAAGTTGTGTTGAATACTTAAATTTGCTAAGAGTACATTTT  
AGGTGTTCTCGGCACACCCACACACACACACACTTACACACACACTCA  
ACTATGTGAGGTGATACATTTGTTAACTAGCTTGATTATGGTAAGAACCT  
CAGAGTGTGTACATATATTGAATCACCACATTGTATACTTTAAGCATATA  
CAATTTGCATGTGTCAATTACACACTAACAGACCTAGGAGAGGAAAGAAT  
TTGGAGGAAGAGAGAAGAGAAAAGCAAATGGTAGATATGGCCAGGTCACG  
ATGACATAAAATACCCCTCCCAAAACAAAACCAAACCAAACAAAACAAC

AGCAAAAAAAAAAAAAAAAAAAAAACAAACAAAAACAATTTTAAGAA  
GAAATTGCTTATAACTACTGACATGATCATAGAGATGTGAACAAATGACT  
CTGTGTCTGATGGTTAGGACACCATTGGCAATCTTACTCATAGTCATTTT  
GTTAAAATAACAGGAGTGAAACCTTAGTGACAACTAGAGTTTGAACAT  
ATGAAAAGGAGACAGACACTATTTGAGTAAATACGGTGGAGAAATCGGGC  
TATAAAATAAAAAATAAAAAATAAAATGTTTGTTCAGACAGTC  
CCAGAATGAAAAGTAGTATTTTTTTTTCTCAAGAAGAGGGCTTGCATGTT  
TGCCTACCTAAGACAGAATCAGCATAAAGAAAGAACTCGCCCATACGAGA  
AAGAACAAACAGAAAGGGGTTTGACAGAGGGGAGGAGTCTTGCAATAAT  
CTGGTTGATTACTCGTTTCTCTTCTTACCTGCTTCTCAGAGTTAAAGCCC  
CTTACCCACAGTTCAACTTCTATCAGTCTCCAAAATAATATGCTCTTGA  
GAGGGGACACATACAGAACGCAAAGCACCTTAGGGGTACGAAGAGCTCC  
TCTCTCCTCAATTACACACATATACGCTGCTTATACCCACAGCTAAGACT  
GGCAAATTA AACAGAGATCAATTTAGCTTGTTAGATCTTCTGGAAGTTT  
ATATGGTATAAGGAAGTCCAGTATGTCACAGGAATAGGCTTTTTAAGCTC  
TCAAGGACAAAATTCAGGATAAATTTAATCAAGTTCTATCATTTCTTT  
CTAGTTACACCCCTTCAGTTAGCTTGCCCAAGAGTAATCCATTCTATGG  
AATGGAGACTTACTGATATCTAAAGCCTCCCATTTTGGATGTCTCATCTT  
TGAGGATTTCTCCTCATAACTTATTTTCACTGTTGGTGCCTTTTGATAA  
GTGCCAGATAAATTGGAAGCAAACTAACAAGCACAATGAAAAATAAA  
AAAAATTTTTTTTGAAGAAAGGATAGTTCTGTGCGGTTCTGACAACTTTG  
CGTCAAGGCTTTTTGTGTCAAGACATCATTATGTCAAAGACATCTGTGTC  
CCCACCTGCAGATAGAACACAATTACAGAAATCCTAACAACCCAACTTG  
ACTAAAGTTGTTCACTGCATAGAAATACACTGCTCTTACAAAATTGAAAT  
TGTATGACAAGAAGAACTCAAGCTGTGGTGTGTGTGATGGAGTTATAAA  
ATATCCATGAGGAACCAAGCAAGAGATAAAGAAGACCAAGACAAGTAAT  
ATGTTTGTGACTGCAAAGCTCCGTATCGTGTCTCTGTAGTCTGGGGAAC  
TGGTATGGATGTGGTGAATCAAAAGCATGCTCTTCGGGGTAATATTCC  
CCATTTGTAACATAAGCATAGATCGTGATTTTCATGACAAATCACCACA  
TTGCCCTCTTTTAACAACCTGATTGAAAGCTCATAGATGTCTTTGAACTCT  
GATGAGGAGAGGCTTTGCAAACCAGGAATATTAACCTCAGCTGGGGTGTC  
GGAAGCTGGGGTGATAAGAAACAGTTGCTTAAATTAAGGAATTCCTACTG  
TCATTGGCATCATCCTTCTTCAAGACCACTTACATTCTTGTCTCCATTA  
GTACATATGACATTTTTTTGGCCAATTGGAAGGCTCATCTATATTCTTTAC  
GTTGACTTTTTTTTTTCCCTTGTCAAATCCAAGCCATCTCCAAGCTTTCT  
GTGATGCTCAAATAGGAAACAGTAGAAGCAACTCTCTCTGTATGCTCTTC  
TTGCTTCTATTTGGTGAACAACTTCCCTACTTGCTGGAAGAGGGTGAAAC  
TATAGGTATAGGCAAGGAAAAAGTTGTTGTATACTGTTAATTATAGGCAA  
GAATGGGTATAAACACAAGATTTAGGAGTAAATCAAATTGGAGCTAGTT  
GTGTAGGGACTACCTTCCCTAGGAGAGGGTACCTGTACCCTAGCAGAGT  
ACAGATTCAAGTAACCTTTCCTGCCTTGAATCCTCAAGACCAGGATTTGA  
GGACCTGGCTGGCATTTTGAAGAAGGTACATCCAAGCAAGACAGAAACAA  
ATTATTTAAATCAGAGGAGGTCTCAGAGCCATTCCCCATCCTTACTCAC  
TATCTGCATTTTTTAACAAAAGTGAATCTAGAAGTGGAATAAACTCTTAA  
TTTTATGTTTATTTAGTTATTGAATACAACCTCCCACCCCTTTTTTTT  
TAACCTTTTTCATCTTGAAGGTGAATCTGGAAATGCTGTCTGGCTTATAT  
TTTGAAAGGACCCCCCCCCCCCCCAATGGCTGTTGCATTGAGAATTGACT  
GTTTGAGCAGATACAGGGAAATCTGTAGGGGGACCTTGGGCATGATCCAG  
GTGACAGATCATAGGGTTAGACCAGGGTGGAACAGCAAGGTGGTCAGA  
AGAGGTCACAGTCTGGAATGTTTTGAAGGAGGAGCTCTCAAAGTGTGTG  
GACAACTGCATGTGGTCACATGAGGTATAAGTAACCGCGAGGTT  
TGTGACCTGTCCAACAGGTGTTGTTTTGTGGGGATACAGCCTGGGGAGGA  
AGTGCAGGCTCAGCTTTCAGCACATTTTGGTGGAGGGCATTGTGGAAGTG  
CTGGGAGGCAGACTTTTTTCATGGGAAAGTATACTTTCTGTTTGGGGTTT  
TTAATTGAATTGTTTCATAGCTGCCTTCTTCATTTTTTATCCATTTTTTC  
CTGGTTCTGGCATCTGGCACATAAAAAATGTGTATGACTATATCTCCTG  
CGAGCCAAACATCACCATCTTTCACACCCATTCTTCAGAGAGTAAATTGT  
CCAGAACCCCTGAAGATCCTGGGTCCTTTGGTAATGTATCAAAGTTCAGC

TTGACAAAGAGGAGGCTCAGACTGGCATGAGGCTCTCCGGACAAGATGCG  
ACCAGAAGACAGGAGAATTGATATCTTTTTTTTTTTTTCATCTTCCCCC  
CACCCCTCTTCTTTAAGGCAGACTATGTATGGACTAGTTCTAGCAGCCCA  
AAGATACCTGGTTTTCTATTGGTCTGCTCTCCATCGAAAAGTTGGAGAGTT  
TAATGTCAGAACTTGCTAACATAGCTTTGCCAAAGCCTGACATCATCCAT  
TCAATTTATTTTTTTTATTGATTTATGGTTATTACCCTTAAATAAATTTTT  
TTTTATCAGAGCAAGTCTTGCTTATGCTTGAAATTGAAATATTGTTAAGA  
AGCATATGCAAAAGTTAGTGGTCCCCTCCCTGACCCCACTCCCAAACTG  
GTCACCAGGCAACCATTTTCACAGTTTAACTATCCCTTTGTCATCTGCTT  
CAACATGTCCTGAACAAAAATAAGTATACGCTGCATCTTTCATACATGAG  
GTCTTAGCCATGTTTCCAAACAATTCAATCTCCTTAAACCATGCAGTGT  
TTCTGTTATTTCAACTACATGAAAATTATCCACTACTGAGCCTTTTATAT  
ATTATAGTCATCGGTCATTTTATTGCACATTATCTTTCTTGTGGAGGTAAT  
AATATATGTATTTTCAATTGATTTTCTCATTAAGTGCTCACACCTCCTTCAA  
CAATTCTGAAAATCATTTTTTCTATCCTGGAAGATAACCCATCTGGTTAAT  
TATTTTCCCCAAAGATGTCCATCTGGAGCTCTCTTGTCTTCCTCATGCAG  
TTTGGGTTGGTTGCCCCCACCATCTGCTGCACCATTCTTGTCTGGTCTTC  
ATTTTGGGGTACCCTTTGCCTCACTCCTAACTGCGATCTTCTGTTTCCTG  
GTTCCCATTTTCTTCATTTTCTTGTATTGTTTCTTTGTTTCAGGAGATC  
ATATTATCTAGCCATTTTCTACCCAGGACCGTTTTTGAGAGTTTGCTTG  
TTTGAAACCTTTATTTTACCCAGTTCAGTTGAATATAGAATTCTGGGATG  
GACATCATTCCTCTCACAATTTTCAAGGCATTTATCCTTTGTCTTTTGA  
AAATGTCAGTATTACTGTTGAAAGACCCAAAGTTATTATTCTTTCAGGCC  
TTGTGTATGTGCTCTACACTTTTACTTTTCATCTTTAATATCTTATATTTA  
TGTCGGGCATACTGACATTCCGTCATTTTCTTTAATAAGCTTCTGTTTT  
CTATCACATTGCCATTTCTTAGCCTGTCGCTGTTGTTCTTAATGTTCTAC  
TTCTCAAGTCATTCTCTGAAATTTTTGTTCCACTTTACTTTTCGGAGCTTC  
TTATTAAGGCTAACATACATATAATAAAGTACATCCATCGTAAGATTATA  
ACTTGATGAGTTTTTACTACTAACCATGCATGTCACACAGACAACATCCA  
AGGAACAAAAGAGTGTGAGTATCCTAAACAAGCTCACCTGCTCTCTTTTG  
ATTTCATATCCCCCATCCAATAAGGTCCTAACTTCTAACAGCACAGATT  
AGTTTTGCTTCTTTTTATTTATTTGATTCTTTAAATGGAATTGTACAGTA  
TGCATGCTTTTATTTCTGGTTTGTGTTTAGCTTGCTAAACATTTTGGTTAT  
GAGATTCAAAATTAGTGTGTGTGCAGTTGTAGATTGTTTATTGTTTATTC  
CACTGTAGGTATGTGTCTGTGTATGTGTGCACATGTGTAAGAGAGAAAAG  
CCATGATTAAAGAATTGTGGGAAGAAGGTGGGGAAATTGGATCAGACAGCC  
CAATGGTATTGATACCATTGGTAATTTTCTGGTTATTAAATTGACTGGCA  
GATTTGCAAGTGTTCACTGTATTATTTGCTTCACAATATCCATATACAT  
TGCATAGAGTACCTTAAGTATCAAATAATACAGAATTAAGGGAAAATAAA  
ATTGGGCTTGCTGTCTTTTGGTATTCCATTTCTTATTCAAACTTTAGTG  
CCATGCATTACTGAGATCTTCTGATAACAACATATTCTCAAGTGAATCAG  
CAAACTGGATCACCTTTAACAATTTTGAAAATTCTTGAGATGTTTGCCT  
CTTAGTCTTGAATATGTATGTCCTAATCTATCCTGCACCTTGTGGAACT  
TTTCTTTTTCTTCTTTTCTTGTCTTCTTTTCTCCTCCTCCTCCTCCTC  
CTCCTGCTTCTTCTTCTTCTTCTTCTTCTTCTTCTTCTTCTTCTTCT  
TCTTCTTCTTCTTCTTCTTCTTCTTCTCCTCCTCCTCCTCCTCCTCCTC  
TCCTCCTCCTTCTTCTTCTTCTTCTTTTTTTTTTTTTTTCATCAGTAGCA  
ATAGACTTGTCCTCCCATGGTTAAATAGTTAAATGCTTGATCTTTCTTTAC  
TGTACCATAAATAATGGAAGGTGCATCTTTCACATATCTGGAAAACAG  
GCTAATTTAAAAAGAAATACACTGCATTTATTTTCTTCCATGCGGTTGGA  
TACTTTGTAATGTCCCTGGAATGAAAGCACTCACTCTTCTCCTGTCAAAT  
TAAACACGGAAATATGTAGATGGTTCCATTGCTGTTAGCAACGATCTTGC  
TAGAGGAAAAACAGACTTCAAAGGCAGGCAGCAAAATGGATTTGCAAG  
TCCTGGTAAACTTTGGATCAAATCAGTCTTGAAGGCTGCTCTATCTTTAG  
AATTTTCAGGTGTGGGTAGAGCTTCCTTTTATTTTTTAAAGCTAGTTTGGG  
TTAGGAATACTAACAGATGCGATTCAAATAACCCTAATGCAATATCTAAA  
AACAAATGGTCCCTGACAAGCAAAGGTATAAAAAATATTTCTCAAGAGATC  
TCACTTCCTTTAGCAAGAGAACTAGCTTCAACTTGCAGGAAGTTAATTGA

AAATCCCCACAGAACTGAACTGAAGTGAATGCCCTTCAGAACATCAAAGC  
ATTTCTCAATTCCTTAGGTCTTTTGATCAACTCACAGTCCATTTGGCTCC  
CTCTGGTATTTTTTTAATAATAATTTCTGAAGCTTAATAGTTATTTCTTC  
AGCTTATCATAACATTTTTCCAACCTAGTTCATTCTTCTCTCACATTAG  
TCATGTTGTTTCCATTCTGGATGTGTGTTTACTTTCTAATAAGATGGTTT  
TATTTCTCAAAGATTTTCCTTTTAACTTTCAAATGAAGATAGCAAAAT  
CTAATATAAAATTTCAACGCATTTAAATTACAATGGATTATAATGTGGAA  
GTAGCTGTAGTTGTGACTAAAGTTAATTCTGAAAGCTCTAAATGAATCTT  
CATTTCCCTTAAAAACTGTGGAGCTACACGGGTGGATATGCCTCCCGAG  
CTTCCCCCTTACCCTTTCTAAATGTTTGCCTTGGATATAAATATGTTTTT  
ATATCTCAGCTAATTTACATGCAAATTCATTTCCACCCCAATCCAACCT  
TCTGCCATTTTCTGTCTGCGCCCAACGTATGCTAACACAGTTGGCTTCT  
GATTTTCAAGCTGAATGTTTGTCCCCAAAAGCAGCATAAGCATTTTTGTG  
CTTGAGCAAATAGAGTTCCAGTTTAAAATTTCACTCTCTCTCTCCGTTTT  
CTCATTTGCACATTTCCCTATATTCCTTTTTATCTCTTTTTCCACACACAT  
CTTGAGAAGAAATAAAGCAACTCAACTGATTCAACTTTAGAAGTGTATTT  
GCCAATAAGACTTTGAAAACAAAATACTCCCAAAGTGCAGGATATTTTAT  
AATCATAAATTTGCTCATTCCCATCATCCCCAAGGGAATAGAGCACGTAT  
TATTATTCCATTAAAGGAAATGAAGACTCTCTGAGCCAAGCAATTCTCTCC  
TGAGCTCCCTCCGCCCATTTTCATGTTCTAAAACCTTTCTCTGCACAAATG  
GTTTTCAAACCTTGTGAGCCATAACCTTGCAACTTGCAAGCTTCTTAA  
AGCTCACTCCCTGCAGACACTAAGAGGTAAGCCAAGTGAGTAGGGCTCTA  
GCTCCATGGCCCTCCTAGAAAACAAAGTAGCTTAGCCTCTGAGTTGTACCT  
TGTAGTTGTGTCTGACATTGTACTTGGAAAAAAGGACTCAGTGTTAAAA  
ATGACTGGAATAAATCTTCTGTAAAGTTTCCCCACGAATACTCTAGG  
TTTTTCCTAGAAAATATCCAAGTCAACAGAAAACAAAACAACAAAAACA  
AATAAAAAATAGTCAAAGCAAACTTATGCTAATGTACAAACACTTTCAA  
GTAAATGTAAGGTAGGAGAGATAACTTTTTGGATAAATGACCTGAATTTT  
TATACTTTTATGAGCTTGTAATAAAATATGTTTTATAAACATTAAAAATA  
CAAAATAAACCCAGCCATGGAAGTGAAGTCAATGCTGTCTTGAATTATG  
TCCAAAATCTCATATTAATATATCCAGATCAAGGTTGAGTCTATCTATGT  
AAAAGCACAGGAGGAAATCAGGAAATCATCCAAATAATGCTTTAAAAGTC  
TCATTTATTTTAAAAACTCTCTATTCGCAAAAATGGTGCAGAACCCCTTCA  
TCCAAGTTCCCTAATTTTGATAACTTAAATACTACTGTGATCAACACCG  
GGAAGTTAACTTTGACACAATACCATTAACTGAAGTACAGACCTTATTTA  
AGCTTTATTGGTTTTCCACAGATATCCTGTTTCTCTTCGAGGATCCCTC  
CAGAATCCCATCTAGACCATGGCTCCTTGGTCTTCTGCAATCTGTGACAG  
CTAGATCCTCAAGCTTCCTTGTTTTTCACAATCTCGACATGGTTGACGA  
GTACCAGTCAGTTATTTTGTAAAATTTAAAAATTTTAAAAATTTATGTAAA  
ACCCAGTTTGGGTTTGCCCAATACTTTTTTTTTTTTTTAAATGTTTGGATTG  
AGGTCATAAATTTTGTACAAGACTACCACAGAAAGGGCATTGTGCTTCTC  
TCAGGGCACATGATGTCAATGTGGCATTACGGGATTGCTTGGTTAAGATG  
GTACTTGATGTATTTCTCCACAGTCAAGTTATTATTTTCTCTTTGTTGT  
AAATAGCACCTTGGGAGAAATACCTTGAGACTATACCTATATCTTCGTTT  
TCTTAAACCTTTACCAGGTAATCTTAGCCTTCATGATGGTTTTTAAAAA  
TGTATTTGTACATATAAATTATAGATACGAATATATTTTATAGTATAATG  
ATTTCATATTTTCTGATTGCTGAGATTTTTTATGTGAGTCAGTGTTGAAT  
TTACCAAATAAATTTTCTGCATCTATTCCCTATGTTTAAACATTTTCTTT  
ACATTTTAGCATGGAAAATTACATTGATTAATTTCTTTTTTTTAAAGATT  
TATTTATTTATTTATTATGATAGACACAGAGAGAGAGAGAGAGACTGAG  
GCAGAGACACAGGAGAGGAGAGAGCAGGCTCCATGCCCGGAGTCTGACG  
TGGGACTTGATCCCCGGACTCCAGGGTCGCGCTCTGGGGCAAAGGCAGGT  
GCTAAACCACTGAGCCACCCAGGGATCCCCCTCATTGATTAATTTCTAA  
GTCCACAGATGGTTCTGATCAAATGACGCATGACTTTTTTCTTAGAGAAA  
TGCCCAATGCAAATGACTATTATATCTGATGTTACTATTTTGAATGATT  
TTTTTTAAAGATATTTTAATTCATTTGAGAGAGAAGAGAGCAAGCTTGGG  
GGAGGAGTGGAGGGAGATGGAGAGAGAACTAAAGCAGACTCCACGCTGA  
GCACAGAGCCCAACTGGGGGCTCTGTCCCATGACCTGGGATTACAACCTG

AGCTGAAATCAAGAGTCTACACCACCCAGGTGCCCCCTATTTTGAATGATT  
TTTTTAGAATACTGCCCAGAGCAGTATTTTCAAAGTGTGTTCTAAAGACC  
ACAACTCTACAGAATGCTCAAAAGTACTTCCATCATCAAAGAAGTTGGG  
AAACATCACATACTGTAAGTACTTTCTATCACAATATATGTTAGCAGAT  
TAAAGATTTCATATAAATCCCCAAAATACATTTATTCATCTTCTTAAGTCA  
AGTATTTCCCAAATTTATCAGACCACAGAACTCTTCCTTACCAAACATT  
CATTAACAGCTTAGGAAACCATTAACACACTTAGGAAAATTCTTGCCTTT  
TATAAATGAGCAGTTTTAGAAATGTTTATCAAATTAAGAGCTTATTAGTT  
TGTGACAATAAAGATTTACTGAACACAAGTTTTTTTACACTTTATATGAAA  
ATATTATTTCTTATCCTAATGAATAATGTAAACTATCTCTGTGAGATGA  
AAAGACATGATCAACTATTTCATATAAATAATAATTAACTTAAAAGTAAA  
CACACTGTCTATATATATTTTTTTTTTTCAGGAACAAATGTTTTATTTCTGA  
CTTTTTTCAGTGTAAGTTAAATTAAGTAAGATACAGAGACAAGTCATGAC  
ATAAAAGTAAAGTTTTTAAATTTGCAATTGCCAATTTTGATATGTGCAAAA  
AAAAAAAAAACCTTGATAATAAATGCAATATACAAAACTTCATTTACTT  
GAAGTATAATAATGCGGGGGGAGGAGCAAGACGGCGGAAGAGCAGGGTCT  
CCAAATCACCTGTCTCCACCAAACCTACCTAAAAAACCTTCAAATTATCCT  
GAAAACTATGAATTCGGCCTGAGAATTAAAGAGAGACCAGCTGGAATGC  
TACAGTGAGAAGAGTTTCGCGCATCTATCAAGGTAGGAAGACGGGGAAAAA  
GAAGTAAAGAAACAAAGGCCTCCAAGGGGGAGGGGCCGCGAGGAGCCGGG  
CTGAGGCCGGGGCGAGTGTCCCCAGGACAGGAGAGCCCCGTCCCGGAGGA  
GCAGGAGCTGCACCGACCTTCCCGGGCGGAAAGGGGCTCGCGGGGAGGTG  
GAGCAGGACCCAGGAGGGCGGGGATGCCCTCGGGCTCCCCGGGACAGTAA  
CAGCAACTGCGCGCCCCAGGAGAGTGCGCCGAGCTCCCTAAGGGCTGCAGC  
GCGCACGGCGGGACCCGGCGGGACCGGAGCAGCTGAAGGGGTTCGGGCGG  
CGGCTCCGCGGAGGGGGCTGCACGGCCCCGGGAGCAGCTCGGCCGGGCTC  
GGGCAGAGGAAGAGGCTCCGTGCGGAGGGGGCTGCGCGGTTCAGGAGCA  
GCTCGGAGGGGCTCGGGGGCGGCTCCGCGGAGGGGGCTGCGGCCCGGGAG  
CGCGAATCCAACAGCGCAGGCTCCGGAGCACAGGGCGCCGGGACACAGCC  
CAGGATCCCGCCTCCCCCGGGACAGGCAGAGGCCGGGAGGGCCCCAGGACA  
GCGAGGACGCTCCTGCCCCGAGCTGAGCAGATCAGCGCCCCCGCCGGAG  
CCTCCAGGCCCTGCAGACGGAGTTCCTGCCGAGCTGAATCCAGGTTTCC  
AGAGCTGCCCCGCCACTGGGGCTGTTCTCTCTGCGGCCTCACGGGGTGAA  
CAACCCCCACTGAGCCCTGCACCAGGCAGGGGCACAGCAGCTCCCCAAC  
TGCTAACACCTGAAAACAGCACAAACAGGCCCTCCCCCAGAACACCAGC  
TAGACTGACAACTTCCAGGAGAAAGCCAAGGGACTTAAAGTACACAGAATC  
AGAAGATACTCCCTGTGGTTCCTTTTTTTTTGTTTTGTTTTGTTTTT  
GTTTTTTTTTTGCTTTTTGATTTGTTTCCTTCCCCAACCCCCCTTTTT  
TCTCCTTCTTTTTCTCTTTTCTTCTTTTTTTTTCTTTCGTTTTTTTTT  
TCTCTTCCCTTTTTTCTCTTCTCTTTCTTCTTCTTCTTCTCTCTCTCT  
CTTTTCTCTTTTTCCCAATACAACCTTGCTTTTGGTCACTCTGCACTGAG  
CAAAATGACTAGAAGGAAAACCTCATCTCAAAGAAAGAATCAGAAACAG  
TCCTCTCTTCCACAGAGTTACAAAATCTGGATTACAATTCAATGTCAGAA  
AGCCAATTCAGAAGCACTATTATACAGCTACTGGTGGCTCTAGAAAAAG  
TATAAAGGACTCAAGAGACTTCATGACTGCAGAATTTAGAGCTAATCAGG  
CAGAAATTAAAAATCAATTGAATGAGATGCAATCCAACTAGAAGTCCTA  
ACGACGAGGGTTAACGAGGTGGAAGAACGAGTGAGTGACCTAGAAGACAA  
GTTGATAGCAAAGAGGAAAACCTGAGGAAAAAAGAGACAAACAATTAAAG  
ACCATGAAGATAGATTAAGGGAAATAAACGACAGCCTGAGAAAGAAAAAC  
CTACGTTTAATTGGGGTTCCCGAGGGCGCCGAAAGGGCCAGAGGGCCAGA  
ATATGTATTTGAACAAATTCTAGCTGAAAACTTTCTAATCTGGGAAGGG  
AAACAAGCATTTCAGATCCAGGAAATAGAGAGATCCCCCCTAAAATCAAT  
AAAAACCGTTCAACACCTCGACATTTAATTGTGAAGCTTGCAAATTCCAA  
AGATAAGGAGAAGATCCTTAAAGCAGCAAGAGACAAGAAATCCCTGACTT  
TTATGGGGAGGAGTATTAGGGTAACAGCAGACCTCTCCACAGAGACCTGG  
CAGGCCAGAAAGGGCTGGCAGGATATATTCAGGGTCTTAAATGAGAAGAA  
CATGCAACCAAGAATACTTTATCCAGCAAGGCTCTCATTCAAATGGAAG  
GAGAGATAAAGAGCTTCCAAGACAGGCAGCAACTAAAAGAATATGTAACC

TCCAAACCAGCTCTGCAAGAAATTTTAAGGGGGACTCTTAAAATTCCCCCT  
TTAAGAAGAAATTTCAGTGGAACAGTCCACAAAAACAAAGACTGAATAGAT  
ATCATGATGACACTAAACTCATATCTCTCAATAGTAACTCTGAATGTGAA  
CGGGCTTAATGACCCCATCAAAAGGCGCAGGGTTTCAGATTGGATAAAAA  
AGCAGGACCCATCTATTTGCTGTCTACAAGAGACTCATTTTAGACAGAAG  
GACACCTACAGCCTGAAAATAAAAGGTTGGAGAACCATTACCCTCGAA  
TGGTCCTCAAAAGAAAGCAGGGGTAGCCATCCTTATATCAGATAAACTAA  
AATTTACCCCAAAGACTGTAGTGAGAGATGAAGAGGGACACTATATCATA  
CTTAAAGGATCTATTCAACAAGAGGACTTAACAATCTTCAATATATATGC  
TCCGAATGTGGGAGCTGCCAAATATATCAATCAATTATTAACCAAAGTGA  
AGAAATACTTAGATAATAATACACTTATACTTGGTGACTTCAATCTAGCT  
CTTTCTATACTTGATAGGTCTTCTAAGCACAACATCTCCAAAGAAACGAG  
AGCTTTAAATGATACACTGGACCAGATGGATTTTCACAGATATTTACAGAA  
CTTTACATCCAAACTCAACTGAATACACATTCTTCTCAAGCGCACATGGA  
ACTTTCTCCAGAATAGACCACATATTGGGACACAAAATCGGGTCTGAACCG  
ATACCAAAGATTGGGATTGTCCCCTGCATATTCTCGGACCATAATGACT  
TGAAATTAGAATAAATCACAACAAGAAGTTTGGAAGGACCTCAAACACG  
TGGAGGTTAAGGACCATCCTGCAAAAAGATAAAAGGGTCAACCAGGAAAT  
TAAGGAAGAATTAATAAGATTTCATGGAACTAATGAGAATGAAGATACAA  
CCGTTCAAAATCTTTGGGATGCAGCAAAAGCAGTCCTAAGGGGGAAATAC  
ATCGCAATACAAGCATCCATTCAAAAACCTGGAAAGAACTCAAATACAAAA  
GCTAACCTTACACATAAAGGAGCTAGAGAAAAAACAGCAAATAGATCCCA  
CACCCAAGAGAAGAAGGGAGTTAATAAGATTTCGAGCAGAACTCAACGAA  
ATCGAGACCAGAAGAACTGTGGAACAGATCAACAGAACCAGGAGTTGGTT  
CTTTGAAAGAATTAATAAGATAGATAAACCATTAGCCAGCCTTATTAATA  
AGAAGAGAGAGAAGACTCGAATTAATAAAATCATGAATGAGAAAGGAGAG  
ATCACTACCAACACCAAGGAAATACAAACGATTTTAAAAACATATTATGA  
ACAGCTATACGCCAATAAATTAGGCAATCTAGAAGAAATGGACGCATTCC  
TGGAAAGCCACAACTACCAAACTGGAACAGGAAGAAATAGAAAACCTG  
AACAGGCCAATAACCAGGGAGGAACTGAAGCAGTCATCAAAAACCTCCC  
AAGACACAAGAGTCCAGGGCCAGATGGCTTCCCAGGGGAATTTTATCAAA  
CGTTTAAAGAAGAAATCATACCTATTCTCCTAAAGCTGTTTGGAAGATA  
GAAAGAGATGGAGTACTTCCAAATTCATTCTATGAAGCCAGCATCACCTT  
AATTCCAAAGCCAGACAAAGACCCCAACAAAAGGAGAATTACAGACCAA  
TATCCCTGATGAACATGGATGCAAAAATTCTCAACAAGATACTGGCCAAT  
AGGATCCAACAGTACATTAAGAAAATTATTACCATGACCAAGTAGGATT  
TATCCCTGGGACACAAGGCTGGTTCAACACCCGTAAAACAATCAATGTGA  
TTCATCATGTCTAGCAAGAGAAAAACCAAGAACCATATGATCCTCTCATTG  
GATGCAGAGAAAGCATTTGACAAAATACAGCATCCATTCTGATCAAAAC  
TCTTCAGAGTGTAGGGATAGAGGGAACATTCTCGACATCTTAAAAGCCA  
TCTATGAAAAGCCACAGCAAAATCATTCTCAATGGGGAAGCACTAGGA  
GCCTTTCCCCTAAGATCAGGAACAAGACAGGGATGTCCACTCTCACCCT  
GCTGTTCAACATAGTACTGGAAGTCCTAGCCTCGGCAATCAGACAACAAA  
AAGACATTAAGGCATTCAAATTGGCAAAGAAGTCAAACCTCTCCCTC  
TTGCGCGATGACATGATACTCTACATAGAAAACCCAAAAGTCTCCACCCC  
AAGATTGCTAGAACTCATACAGCATTTTCGGTAGCATGGCAGGATACAAA  
TCAATGCCCAGAAGTCAAGTGGCATTCTATACACTAACAATGAGACTGAA  
GAAAGAGAAATTAAGGAGTCAATCCCATTTACAATTGCACCCAAAAGCAT  
AAGATACCTAGGAATAAACCTAACCAAGATGTAAAGGATCTATACCCTC  
AAAATATAGAACACTTCTGAAAGAAATTGAGGAGGACACAAAGAGATGG  
AAAAATAATCCATGCTCATGGATTGGCAGAATTAATATTGTGAAAATGTC  
AATGTTACCCAGGGCAATATACACGTTTAAATGCAATCCCTATCAAAATAC  
CATGGACTTTCTTCAGAGAGTTAGAACAAATTATTTTAAGATTTGTGTGG  
AATCAGAAAAGGCCCCGAATAGCCAGGGGAATTTTAAAAAAGAAAACCAT  
ATCTGGGGGCATCACAATGCCAGATTTTCAGGTTGTACTACAAAGCTGTGG  
TCATCAAGACCGTGTGGTACTGGCACAAAAACAGACACATAGATCAGTGG  
AACAGAATAGAGAATCCAGAAGTGGACCCTGAACTTTATGGTCAACTAAT  
ATTCGATAAAGGAGGAAAGACTATCCATTGGAAGAAAGACAGTCTCTTCA

ATAAATGGTGCTGGGGAAATTGGACATCCACATGCAGAAGAATGAACTA  
GACCACTCTCTTTACCATAACAAAAGATAAACTCAAAATGGATGAAAGA  
TCTAAATGTGAGACAAGATTCCATCAAAATCCTAGAGAAGAACACAGGCA  
ACACCCTTTTTTGAACTCGGCCATAGTAACTTCTTGCAAGATACATCCACG  
AAGGCAAAAGAAACAAAAGCAAAAATGAACTATTGGGACTTCATCAAGAT  
AAGAAGCTTTTGCACAGCAAAGGATACAGTCAACAAAACCTCAAAGACAAC  
CTACAGAATGGGAGAAGATATTTGCAAATGACATATCAGATAAAGGGCTA  
GTTTCCAAGATCTATAAAGAAGCTTCTTAACTCAACACCAAAGAAACAAA  
CAATCCAATCATGAAATGGGCAAAAGACATGAAGAGAAATCTCACAGAGG  
AAGACATAGACATGGCCAACATGCATATGAGAAAATGTTCTGCATCACTT  
GCCATCAGGGAAATACAAATCAAACTACAATGAGATACCACCTCACACC  
AGTGAGAATGGGGATTATTAACAAGGCAGGAAACAACAAATGTTGGAGAG  
GATGCGGAGAAAAGGGAACCCCTCTTACACTGTTGGTGGGAATGTGAAGTG  
GTGCAGCCACTCTGGAAAACCTGTGTGGAGGTTTCTTCAACAGTTAAAAAT  
AGACCTGCCCTACGACCCAGCAATTGCACTGTTGGGGATTTACCCCCAAG  
ATACAAATGCAATGAAACGCCGGGACACCTGCACCCCGATGTTTCTAGCA  
GCAATGGCCACGATAGCCAAACTGTGGAAGGAGCCTCGGTGTCCAACGAA  
AGATGAATGGATAAAGAAGATGTGGTTTATGTATACAATGGAATATTACT  
CAGCTATTAGAAATGACAAATACCCACCATTTGCTTCAACGTGGATGGAA  
CTGGAGGGTATTATGCTGAGTGAAGTAAGTCAGTCGGAGAAGGACAAACA  
TTATATGTTCTCATTCAATTTGGGGAATATAAATAATAGTGAAAGGGAATA  
TAAGGGAAGGGGGAAGAAATGTGTGGGAAATATCAGAAAGGGAGACAGAA  
CGTAAAGACTGCTAACTCTGGGAAACGAACTAGGTGTGGTGGAGGGGGAG  
GAGGGCGGGGGGTGGGAGTGAATGGGTGACGGGCACTGGGTGTTATTCTG  
TATGTTAGTAAATTGAACACCAATAAAAAATAAATTAAAAAAGAA  
AAACGTGGGAGTAATCTAGCTAGTGAATGGACAAATAGTAGAATACTAT  
ATAACAGCTAAAATAGCATTTTAATAAAGCAGTTTATGATAATCTTAGAA  
AAATGATCAAACCTATTAATAATGTATAACTATACAAATAATACTTGAGAAA  
AATCTATCTGTGAAAAATTATTTAATTTGAAACCTTATAAAGCAAAATAT  
ATTCTTGTACCTCAAAAAAAAAAGTATAATAATGCTAAATTCTGAATAG  
TTCAACATGCTAAAGGAGTCTGGTGAACTAACTTTTGTAATATCTGTGA  
AAAAAAAAAGAATATGTAAAGCAAATTAATAATCATGGAGGCGACAGCAGC  
TCAGTGAATGCCATATTTTTTTAGTTCTTTTGTGAGTACTTAATATCCTA  
ATTAAAAATCTTTCTATCTACTTGCAGAAGCATTTACAACTCTGCATAA  
CCCTGAGTCTGAGTAACCTTCTCCATGCCAGTCAGCGAGCATGAATTGG  
AAGATGCTTTACAGATAGAAGCTTTTAAAATTGCTTCTTTATTAATACTACA  
GTCACACAATATTTCTTTCAATTTCTCTAAAATACTTGCTCACTCAAGAGT  
TTTTTCTGAGCCTTAGACTTCTCTTCTCACCTCTTTTCTGAGGTCAGG  
GAAAATGTGCAAGATATTTCTGAGGGCTCTAGCAATAAGAAGGTGTATG  
ACTAAGCACATCTTTTATTTGTAAAGATTTTGTGTTGTTGTTTCCCTTA  
CATGATAATGGCAGAAGAAGATGGAGACTAGTATTTATTAAGTAGCTAAT  
TTGTATTAGCACTCTTTTAGGTACTTCATGTACCTTTTAAGTCCTGGGAC  
AAACCTGAAAATGTCTCCATTTTGCAGATGAGCAAAAAGCCTAGGACAGG  
TCACTGAGCCAATAAATAGTAGGCTTGGACGTGAGTGAACCTCAAACCTGT  
CTTGTTTAAACACTGTATATTTTTCACCCTATCCCATGCTTTAAAGTGT  
GCAAAATTTCTTATTCTTTTAAAGCACACTTTAAGATCTCCGGGATTGCAA  
TTCTTCAAAGAATACTTGAATAGTCTCTGTTCTTTTACAGAGAAGAAAA  
ATGAGGTCCCATGGAATATAAGATTGCCTCTCCAGTTTCCCTGAGCTCCCC  
CCACTATCCCACCCCCACCCACCATTTCCCATATAATACCCTTTCTTAG  
GAGTCAGTCCCTTTGGAGCCTGGTTAGTCACTGTAACCTTGATCTTTCTAT  
CAGCACCTGGAAGTCCTTTGACTCACACTATGAAAGCCTCATGCTATCTT  
TTGAAGAACTCATTGTCTATTATTGGAGCCACTAGTACCATAAGGAAAAG  
AGGCTGAGAGACTCAGCCTGAGTTCTTATTGTTTCATGGTCACTTATGAAA  
ATTAAACTGAACATAGCAGGATGCTTGACAAGAAAATAGGGCCAAAACCA  
TTAAAAATGACAACATAAGAAGATGGTGCAAGGCACTTGAAATGAGTTAAT  
TAATGCACTTGGTAGCCTAACTGGATCTGCAATAACAATGCAAACATGAA  
AAAAATATAAAATAAAAAATCCCCTCAGACTTTTTGTTTCTTAACTTCTC  
CAGTCAGCATGTTTATGCATTTCTTATTGTGATCCCATTTTATATTTTCTCAG

TCTTCCTGAGCCTGCAAAATATTATGATAAATTTAGCTGTTTACTCTTTT  
GCGAGGATAGCCTGACAAATATTTCTCGATTCATTAACCAACA  
ACTGAGAACAATACTGTATTGTACTTTGTCTTTTTTGTAAAGAAAGGAAT  
ATAAAGCACTCTGTTTTGTAATGAATAGATGAATGATAATGTGCTCCTCA  
ATGGGATACTGTTTCAAAATCTATTTTATCTCTGTGCCTGGGATTTTATT  
TGTGCTTCAATCAGCTGGTTGATTAGCACTAGGTGCCAGGGCAAGAACCA  
GGCTTGCCTAAGAACAGAGTTTGGAACTATTACATATTACTCAGCATAAA  
TGATGAATATAAAAATTGACTTAAAACAAATCATTTTCTACTTCTTTGAA  
AATATCCAACGAAACAAAATTTCTCCAAACATTCAAATGTTGAATTTTAA  
AGTCCATATTATATTGAAAAAAATCTTATATTTATTTTCTTCATTGTGT  
ATATTGGCAAATGAATACTTATTTTCTTAGCAAAAACAGGTAACACTGAG  
CACATGTTTTCATTGGGGCACTTTTTGAATGCATCTTACATAATTCTCATG  
TAATTCTCATATCAACCATATGAGTAAGTATTATTGCTATTAAGATATTT  
TTAAATGGAAAAACAAAACATGGACAGGCTAAAATGACTTATCCAGGATC  
CCTTGGCTGAGGTAGGGATAAGTGTGGGATTAGAAATTAGTAAGTGGTAT  
TAGAACCCACACATTTAGCAATTAAGATGTGTTTGTATTTCCAATGCTG  
CTACTTGCTCTCTTTTTGGCCAAATCCAGTTACCTGAAAGACTCCTTTTCT  
TTTACAAAAGTATTGGTGTAATTAGGCAAGAATCTTTTCTTTCTAAACAG  
GATTAAGCTAGAAGGAAGGGACTGTAGGACTATGTTTATCAAGGTAACCTT  
CGTTCTTCAAATGTTGGTGGAATGTCCTTGTAACCAAGAAGAAACAAG  
ACGACAGTGCAAGAATTTTCTTGCTGTCAGAGTTCCCTTTCCTGGAATCA  
GGGCCAGCAACATCTTACAATTTAAACATTGTGCTCTTCTAGTAGGCACC  
TGTGGACACAATTGAAATATATTTTGTACATTTTCCCTATGAGAAGCTC  
AAATAATTCAAATGACAATTAGTGCTAGAATAACTCTCTAGTATAAAAGA  
GATCTGCTATATATGAAAATGGGTCATTTCCCTAAGAACTGAGACAAAGAC  
ACTAAAATAAAATAAAATCCTTGTAGAGCGAGACCTGGATGTTTCAGTGGT  
TGAGAATCTATCTACTTTGGCTGAGGGCGTGATGCCAGAGTTCTGGAATT  
GAGTCCCACATCGGGCTCCCTGCAGGGAGCCTGCTTTCCCTCTGCCTGT  
GTCTCTGCTTCTGTGTGTGTGTCTCTTATAAATAAAATAAACATCTTT  
AAAAAAATCCTTGATAGATGTATACGTATCTTGATATATCTATCAATGAT  
TATTCTATATATCTATAGATATATCAAGGATTTTATTTACTCTTGGTGTA  
TTGTTTTTTAGTATATCTATCTATATTTATATAAGTACATATTTACTTTT  
ATATATCTGTACATCAAGTAGATATATGGTTATGATGTATTAACCAAGAC  
AACTCGGAGGGGCTTTTGGTTAAATTTTATTTTTTTCAATCAATGTATTG  
TAGGCAAAAGTAATGGATGGATATTGTTACTTGTTTGGATTCTTCTTATT  
ATATACTTCTTTGGACTGCTTCAAACTCATTGGCTGTGGACATTCAAAA  
ACTTTTGAGAAATTTTAAAAATAGACCATCACTGAAGCTTTCTTGTCTCT  
CTCTAAATGTTTCCTTAGAGGGATCCCTGGGTGGCGCAGCGGTTTGGTGTC  
TGCCCTTTGGCCCAGGGCGCAATCCTGGAGACCCGGGATCGAATCCCATGT  
CAGGCTCCCGGTGCATGGAGCCTGCTTCTCCCTCTGCCTATGTCTCTGCC  
TCTCCCTCTCTCTCTCTCTCTCTCTCTCTCTCTCTGTAACATATCATAAAT  
AAATAAAAATTAAAAAATAAACTTAAAAAATAAATGTTCCCTTAGAA  
ACCCAACCTCCATCTAATTAACTAGAGAGATCTAGAACCTTAGAAAATA  
AGCACATGTAGGATGAACCAGGTATTTTCAGGGCAATCCATTATACTGT  
TTCTCTTTTCTTGAAGCCTCCTTTCTAAGGAGGTTCTACAAGCCCTCACT  
GAAAGGGGATTATAATCCTGGCTTCCCTGCCAATGCTCAAGCAGCAAAA  
AACTTAGCAACTATACAGATTTTACTGGGGAAAAAATGGTTATTGGCTCT  
TCTCTCCAACACTACTTAAATCATTTCTTCTGTGTGCGAGAGTAAAGAAAAATT  
CTTACTCTAAATTCTTGGTGGTTTCTAGTTAATCGACTTCTAATGAGGTA  
TCTGGCACCAGCAGCTCCATGAGGCTGAAAATGTGTCTCCTTTTGTGGA  
TTTAGTCAATCTTGTATTGAGTTTGAACACTTTTGCCAGTTCATTCAA  
TGCATGAAGGTGAACATATACCATAAAGGAATCCTCTTTAAATGTATAT  
CCATGCCAGAAATATCATGTATTATACATCATTTCTTATAAATATATAAA  
AATAATAATTACTAACATATGTAAATACTTAACCAAGTACCTTATTTTCC  
CCACCTCACCATGAAAATTATTTGGGAACAAATTCTTGTCGTTTCTCGTG  
ATCCTTTTCTTGCCATGGAGAGTCAGGAGCACGGAAGACATTTGCAGTA  
AGACCACCTCTCTCCAGATGTTCTCTCTCCCCACCACCTTTTCTTCTGCT  
CTCCTCTTTTTCTCCTCCTTTCCCTCTACATTCTCTTCTTTGGGTAAACA

CTACTTCAAAGGACAAAGGAGTCTGAGACTTCTACTCATTCTGCTTGT  
ACTAAATAATTGTTTAAATTAGTTGAAAGAGACTGATGTCTTTTTGCACAG  
AAAATAAAGTATGCATTCAAGCCAGGAACAAACAACAAAACTCAGCAAG  
GGGTGAAAGCTGAGACTACAGAATACTGGCATGTTCCCTTGTTAATGATA  
TGAAC TTGGTTAGTCTGTTTCTCTTACAAAGATTAGTCTTCTCATCTGC  
ATATTGGGATCCATGCTAGTTGTCTGAAAGATTTGACAGGCTTCATACATA  
GCACCCCTCTTCTTACCCAAGTTCTGAGAAAATTGAGAAAATGTTATAA  
AGAAGTGACAGATAGAGTCCAAATTATCACCCGGCCTAATGATAAAGTTC  
GTATCCGAGCCAATGTGAATCTCAGAATGAAACAGATAAACCACCTGTAT  
GTGCCAAGACCACCAGGGTCACACCTTGGGCATGGAGGGGCTTCACGTC  
TGGGAGGGGAGGGAAGAGAAAGAATGCATGAGAAGAAGAAGAGCTGAAGT  
AGTATGACTAATTTATTCTTCTCAAAGTTATTGGTCCAATAAATCATTTT  
ATTTCTTCTGCTGGAATAGTGATTAAGGGTGACAAAGGGTCAGAAAGTGC  
CATATTGAGGAAAACCTTCTGAAGCTGGAAGAACCATTCCCTCACATTAT  
CCCTCCAGGTTTCTGTAGTCTTAACCCATTGTGCTCAGATGCCAAGCATC  
AATCAGAGAAGCAGCCACCACCTCAGGAGAGGAGAGCAGTGATTTTCAGG  
ATGGTCTTATGTTTCAAGTTTTCATGGGCTCCTGCAATACCAGCTACACTTCT  
TTGGGATCTCCTGCTAGACCCACAAGTGGAAGGAGGGGGTCCACATTTTG  
CTCCCAGGAGGCTCTGAAATGGATCAGAAATAGAATGTAAAATAAATGGAC  
TCTTAGGCTATATTTTTTACCCAAGGCTGAAAATTCACACCTGCCATTT  
CTTTATTTCTGTCTTGAAGTGTGTCCAGCCATATAATCCACTGGAGCATA  
TCAGGACACTGTAAAAAGATTAAATGACAGTCTTATATTAGTAATAAAA  
TTGCTTCAAAC TAGAGATTCCAAGAGGGAACGAATTCAAGCAGTATCTCC  
CCATGTAAGTCAAAGATTGTATCTTAAGTATAATATATCAGTGTCCAAA  
GAAC TAACCTTCACCTAAATTCTCTTCCCTTTTTCAAATCAAAGATATGCA  
TATATATTTAATATTTTGTCAATTTATTTATATTATTTATATTATTTCAAT  
ATTTTATTTTACATTATTTTATTCTTTTCATTATTTATTTTATTTTATTTT  
TTTAATTTTATATTATACACACACACACACAGTAAGATGCAGCCAACCCTG  
CTTCTTGTCTGCTTAGATTTAGCTAAGGGGCACCTTGATGTCAACATAGA  
GTTACTTTTTTATTAGTAGCTGTAGCCTGGGCTGTTTCTCTCAAGAACTCT  
GGGTAGTTTCTTTCAGGATTTTGGAAAGTTAAATTGGCTTAACACTGAGACT  
CTGATGCCCATGTTCTTTCTTTACAGATTTCCAATAGAAAATAAACCCACAG  
AATTATCGCCAACAAATTTAGAAAATGAGATCGTCTCCGCTATGAGAGC  
TTTTTCTTAGGAAAGAGCATGGTCTCAGAACCTAGCACTTGGTATTGCCA  
AAAGCTAGAGAAGAAAACAATGTTATCTGAACAAAAGATGAACACCTTAG  
TTTTGTCTTTATTGGAATATCTCTCAGTCTGTGCCAGTTATCTAGAATCT  
ACAATCTGTAAACTTGCTTGGTGGAGAGTAAGCTTCTTGCAGATGGTTAC  
TTTTGGCACTACTCACTTATTTCCACCTGGGAGGAAAAATTTACTGGTTAC  
TCTCTTAGACATCACTGCTTTCTTGCCAAATGAAAATTTTGCAATGGCAC  
AGTCTGAACCTTCAGCTCTTTTGGTATTCTTTTTCTCTTCATATCTACA  
ATTGAAAACTATTAATTTCCATCTGTCCCTTGAGACTCATGTTTCTGCC  
ACCCTCGTTCTAAATTGAGTCCACTTCTGCACCCATACTTCTGAGTGGAG  
GCATTGCATTTTCTATTCTGTATCAAAGTGACCTGACCCACTTCTGTTGT  
TGAGTTGCTGAAGTCCAAGACACCTGCCTTCTAGGGAAAATTTCTTCCC  
AATTAAGACCCAAC TTAACCCCAACATGAGGAGGTGATGGAGTCAGTGG  
ACACATGATGCAAGATTTATCCTTTACCTTTTTCTTTCTTTTCTTTCT  
TTTTTCTTTTCTTTTCTTTTCTTTTCTTTCTTTTCTTTTCTTTTCTTT  
TTTCTTTCTTTCTTTTCTTTTCTTTTCTTTTCTTTTCTTTTCTTTTCT  
TCTTTCTTTCTTTTCTTTTCTTTTGGCTGATCTAGACCTAACATTTATGCTAA  
AGACTGAATCTTAACCAATGTACACACAACCTAGCTAGTACCAGAAATG  
TGGTTTGATCCCCTAATACCTAAAAGACTGTGTCACAGAAATGATTTTT  
CCTATGTCTGATTTTTTGCTAAGGAGAAGGTATACTTCTGAGATAAGCTAT  
AGGAGTTGATGCTGAGGCTTTCTACACCTGTTAACTGCAAGTTGGTGGCT  
TAGATGAGGCCCTCGCACAACTGCATCTTGTGTGGGCTGCCATGATTTTACTGA  
TGGCCATTGTCTTTGGAGACCATGTTGTGTGGCTGCCATGATTTTACTGA  
AGCTATTCAATAGCCCGTATACCCTGCCTGAGGTCTGAGTGACCTGAACA  
TCCTTGGAAGCCTTCTTGCTCCATGGCCCAAACCAGGACCTCAGCTGAA  
GGTTATACCCCTTTGACTGAGGCAGATAGAGATACCCCTTTGACTGAGG

AGATAGAGCCCAAGCAACTTTCACCTTGAAGCTACCTGTATGTGTGTCCAT  
GAATCTATGGAAATAGTTTGCTATGGACTAAGGCAGCACACACAGCACCA  
GGCACTTAGCACAGCCAATTAAGCTGAATGGCCTTTCACAGCAGCAA  
AGAGCCAAATACATGAGGGTAAAAATTTGCCTGGGTAAACATAAGCCTTT  
ATTAGCCACTGAGATAAGAATGTTCTTCACATACACTGTGCTCACAGCCC  
CAAAACATATATCTTAGCCAGAACAAAACCAATTAGTGGATATATCTAG  
CTTCTATAGTTCTTCCATATTCTTCATATACACAGGGGACATCAGGAAGT  
CCCAAATCACTGTGTGCAAATTTTCAATAGAAATGTCAAACATGCTCCAG  
GACAAATTGATTCTGTTTGCCTACTTTGAGAATAAAAAAGGACCGAGAGAG  
TAGGGAGGAAGAAATTTTCATGAAAATGCATTTTGAGAAAATAGTGCATGG  
ATTTTCATCCCATTCTATCCCAATTATGAGAGGTCTGGCCATCTATCTCTA  
TTCTAGACTTCCAAAGGGCTTCCAAGAGGCTATCTGGACAGTTTATTCTA  
TGATTCCAGCAGGTGAGGGGCAGAGTGGGTGCGGATCTGCCTCGCACCTG  
AGAAACCTAGAGCATGAGCAATCTTCCAATAGTCTGCATATTAGGAGAC  
ACAGGAGATGCTGCTCCATGGTGATTGCCCTGCTCTTCCAGTTATTTCCA  
AGAACAATAAAGCATCACTACTTCTCATGGACCTGATACGGGTACATGGG  
AGAGCTGATGAGAACTGTCTAGTCCAATAGAGCACACCCAATGGGGATGA  
CAAAAAGGGAAAGATGGGTGGGGGAAAAGCTGGAGGTGAACTCCTCAGGG  
CTGAAGAAGAGTACAAGCATTAATACCCTGTGTGGTGATCAACTAGAATT  
TTCCCACTCCTATCATTTTCTTCATGTGGATGGTAGTATCAAGAGTGAAC  
AAAAGATACTCTCCCTACTTAGCAAATGCCCATTTAATAGGTTTGCCATG  
AGGATTGACTTGGTTCATGGAAGTGAAAGGGTTAGCACAGTGTTCTTACTG  
TCTATGATCAATACTGGCATAACTAATGGCACATGTAGGTGAGTGACTTA  
ATGACAATCTTTCCAAGTGTATTACACATACCCTCCCTACTCTTCACC  
ATTCAGCTTGACGTATGATCATTTCTGCTACAGTACGACACACACGTTT  
CTCAAAATCACTACTTCATGCAAAAAAATCACACAATAAAAACACAGAG  
TTTGGGATACATTGAGTTAGGGGGTACAGAATCCAGAACTTAACCAAGTA  
ATACTTAAAAAACCTGATAAGAACCTCATAAAATGGTAGCACTTGCTA  
AATGGCTAAGAACTACTGAACTACTATCATAAATATGGCACGTGGGGAAG  
TTTGCTGGTGGAAGTGGGGATGGTTCAGCAGCTGGGAGTTATTGTGAAGT  
GGTAGAAGGAACACCAGAAAGTCATCACACCAGATGTGGATGGGTGTGGC  
TCGCGGTCTGGTGAGGTCTGTGTGTTTGTGTGCTTTGTATATTCCTAGAT  
GGCTCTGTTCTGAAGAGTGAAGTTTTCGGTGTTTACCCAGTGCACCCCAT  
TCATGAAAAGCACATCAGCACATACAAAATGTGTGTTCTCCTCAAACCTGG  
TCCTTAAAGTACCAATCACATTGGAACAAATTCACATTTTCAAGACAAGG  
AGAACTGACAGTGCATATTTACAAACCAGAAGCCACACATCGCCTGGCCT  
GCTTTGAAACGGTATAATTTATGAGAATATGATCTCCCAAGTGCAATGGC  
TACAGCCCTTGGATTTAGGCCATGGGTGTTGGCCAAAAGAAATATATAAT  
AGGGGAGAGAACTCTGTGGGCCCTTGTAGGAGAGCCATAACATCCTCAC  
AAAGTTACTCAACTCTCTGGCTAAATTATTTGTGAGGATGAAGACAATAC  
CTACAGGATTGTTGTGAGGTCCACAAGCAGGAAGAGGAAAAAAGAAAGAG  
GAGAAAAACAAATGGTCTTGACCAATTCTTAGAAATGACAAAGGAGATAT  
GACTCACCCACAAATATCATGTGATAGATTTGAATGGTAACCTTTTTTTT  
TATTAAAACTAAACATAGGATCATAGAAAAAATCAATATGTTTACAA  
AATCTATCAGTCAAGACCTTTATTTTTTTTAAAGATTTTATTTATTTATTC  
ATGAGAGACAGAGAGAGAGGTAAAGACACAGGTAGAGAGAGAAGCAGGCT  
CCATGCAGGGAGCCCAATATGGGACTCAATCCTGGGACTCCAGGATCACA  
CCCTGGGCTGAAGGCAGGCACCTAACCCTGAGCAACTCAGGCCTTCCTC  
AGTCAAGACCTTTAAACTCTAATTCTTCTTATTAAAAAGACTTATTTTTTA  
GGACTCATGTATTTTATTTTATAGAGAAACAGAGAGCATGAGCAGGGTGAAG  
GGCAGAGGGAGAGAAAAATATTCAAGCAGACCCTACACAGAGTGCAGAG  
CTTGATATAAGGCTCCATCCCTGAACCCTGAGATCATGACTTGAAGTGA  
ATCAAGAGTCAGTTGCTTAACTGACTGAGCTACCTAGGCATCCCTCAAGA  
TTGATTTTTTGTAAATGTCTAATTCTTTTTGTGTTTGGCGAGAAATAACA  
AATCCAATCTACCAAAATATAAAAAGTTAATTTTTTAATGATGGAAATT  
ATTAAAGAAAACAGAAGTTGTATATAAAAGCAAATTTGTGGTCACTGAAA  
ACACACATCAAAATAAAATCTTTAAACACTGTCAAAAAGAGTTGAAATATC  
ATAACAATAATATCCCATACAAAGAAATTTATAAAGTATCACAGCTTTAT

AAAAATTCAATTTTGTGTGCATTTCTATAATCTTTTGAATTTCTTTTTTTT  
TTTTTTTTTTTAAAGTCAGTGTTTGTAGGTAAGGTCCATTTCTTTAGATGA  
GAGTTTCTCAAAGAATCAAACCTGCCTTATAAGTTGTGTACACTTCCAAG  
ACATCTAGTCTAGCCTATCTGAGGTGAGTTGCTTCAGTGAAATATATTTT  
GGACAATGAGTTATTTGGCATAATGTAGCAAAGCAACTAGCTGTTTGACA  
TTTTTTTTGTTTGGTATCATGTGGGTGCTCATTTTTTAGAACCAACTCTAAA  
TAACTTTTCTCAAATATTTAGCAAGAATCATGCTATAATAGGCATTCCAG  
AAATATCCAGGGAGAATCAGCAAGCCTTTATTATACAGTCATTGGTCCTC  
ATATGCTCCTGAGGTGTTTATTACATTACAGTAGGATTTTCAGCATCTCTT  
ATTCCTTTCTCTATTAGCTCTGATTTTAATTTTTGTAGTTGTTTTTCGG  
TTTTTTGTTTTGTTTTGTTTTAGTTAAGGAAATGCAGCCATTATTTGGAA  
TTGAAAGATTTTGTTTTATTTGAGAGAGATAGAGAGAGAGCACCATCAGGG  
GATTGAGGTAGGAGAGGGGGAAGCAGGCGCCCTGTCGAGCAAGGAGCAGA  
GGATCCCAGGACCCCGAGATCATGACATGAGCTGAAGGCAGACATTTAAC  
TGACTGAGCCACCCAGGTGCTTCAAGGGCTCTGATTTTAAACAGTTTATT  
TATTTATTTATTTATTTATTTATTTATTTATTTATTTGAGAAAGATTAAGAGAG  
AATATGTGCAGGGGTGAGGGGCAGAGGGAGAGAGTGTGGAGTCCAACCTCA  
GGGCTCAATCCCAGGACTCTGAGATCATCACCTGAGCTGAAACCAAGAGT  
CCAACACTTAACTGACCAAGTCACCCAGATTTCCCAAGGACTCTGATCTT  
CAATCCTTCTGTTTTCTCAAGGTCTAACACAGCACTGAGTGCAAAGTAAA  
TTCTCTCTCTATACCAGTTAAATGTAATGAATACATTACAGGAAAGTTAG  
GGCTGAATTGTCCCAGTTTGGCTTTTTCATATATCGAAATAATCAGATGGT  
CGTTGGAACCTCTACTCGGTTTCAGCTTTTATTAGTTTCAGAAGGGGAAACA  
TTCTGGATTTTTATTTCTTCCCCATTTTTTAATGGATGAAGTCAATTTAGGT  
CACTGTGGATGTGTGGACGAGGCCATGAACTGCAAGCCTGTGTTGCTATT  
TTTATTATTGGGACTATTGAAGCCCCCTTTAAGCTGAATTTATAGACTTTC  
AAAGTGAAAAAGGAAGCAGACTAGTATGGAAGTAGTCTCTAGAGTTTCTCCT  
GCCCCCTGCCAGCCCCCAGGCCCTCAAAGTTAGACTTTTAGTTTCTTGT  
TTCCATGTCAAATCAGAACTGGACCAGTATCACTAGTTTCTCTAGGAAACC  
CTGAAAAGGATGATCTTTACATAAAGTCTTGGCCACTGTTGGAACGCA  
GCCACTTCTGGGGAAAGGCGGAGCAGCTGTTTCAGCTGCCTCATAGCAACA  
CTTCACAACAGTGTGGGAGGAAAACAGGGGAAGAGCAATGCACTTAAATTA  
AACTGCCCTGGGGAGGGTAAGGGACCCGGGCAAAAGACAATCATTGAGAA  
TCGAGGACATCTAATTAGTCAACGGATCTACTCCAAAGGGGAAGGCACTG  
ACTGAATTTTTAATGAAATCACCATAACAGGTCTTTGGTTTCATCTTCTT  
CTTGAAAGGCAATGATACACATTTAAATGCTATCGTTTAAAGAGTCCTTC  
TGTTTTGAACATACTACCAAAGGAGCAATTTTTTTTTTTAATTTGATGACT  
TTTATGTCAAAACAAGATGACAAAAGAACACCAACAGCAAAGAATAAAAG  
TCAACTGGGTATGTTTTTGTACAATTCCTACTATTTTTTCCAAAAGTTC  
ATAACGTTTCGCTCAACCACCACTTGCTTAGAATTGCCAAAACCCAGATA  
ACAATGCGAGAAGCTTCGTTCCAAACTGGTCTATTCTGCTTTTAGCGCAG  
AAACAAGTTCCTATTAGTAGCAGCATTTCTTTGAACCACGATTCAATTAA  
CTATGGGCTAGAAGAAGAGAAGGCCAACTCAAATTTGCAAGTGGAAGAG  
GAAAACATTTGAGCAGATGAAATCAAGACTGCCGTGTAGTTTGTCTGCA  
TAAAGGCACCCAGCCAGGGGGGCAAAATAAAAGCTTTAAATTCTTCTCAAG  
CTGCTATATCTCTGAGCACCAGGACCCCAAGCCACTGCTTGTCAACACAAA  
GGCGCCATCTGTTGGCCAAACCCATAGGGGGGCTACTTTATTTGTTGGAC  
TTGTGGTCAGCCAGGGAGGAGCCATTTTTCTATCAGAAACCTCAGATA  
GAATGTTAGAACCCAGGGGCCCTAGAAGGTCTTCTTGTGAGAAATCTGAT  
TTTATAAACAAGGGAATAAATGAATACCAGGGACAGCTACACAATTTGCG  
CAGCCATGTACAGAATGAAAATGGGAACCCCTGGTTTCAGAAAACAGGAAA  
GGGTACTGTTAAAAGTACTAAAATTACTTTATTTTTGAGAGCTCTCTCAGC  
TTGTCATAGTATTTTTAATTTGCTTGGTGTCAATTTCTTGATTGCTGTCCT  
CAGCAAGAAAAATTTTAAAATGTGTTTATTAGCATGAATTTCTACTTCATC  
TTTATATTCTCCAATGCCAGTTTTTAAATACAAGTAGAAGAGCATTTCACT  
GGTATGCAGACTCACCTAAATTATACAATTTGTGTTCTGTAGGTCATATA  
TGCATATGTGTTTTCCTTCAACAGTGGAATGTCATAGAAAACACTTTC  
CGCTGTTTTGTCAATTTCTTTTAAAAAAGATAGATTTTATTTATTTATTT

AGAGAGAGAGCAAGGGAGAGCTTGAGCAGGGTGAGAGGCAGAAGGAGAAG  
CAGATTCCCTGCTGGGTAGGGAGCCCAATGCAGGGCTAGATCCCGGGACT  
CCAGGATCATGACCAGAACCGAAGGTAGATGTTTAACCAACAGAGCCACC  
CAGGAGCCCTTGTTTTGTCACTTCTTGACACACGTTTTGTCAACACTGTG  
GCTTACTAATGAGTAAAGATGGGGTGAAAGGAAGGGAAGTGTGGATGCTA  
CTATCTTTTACCTTGGTGGACACCTTTTCAGCATAAATGTTTGGCTGGT  
ACCGAGAAATAACACAAGCAAGAAGTAACACAAGACATGATAGGTTCCCT  
GGTCATTTATGTTTCCAAGAATGTCACCTTCTTTCTGCATTGGAAAG  
CAACTTCCGATTTGAATAGAAAACGTGGCCACTCAGTATATCAGAGCCTT  
TCCTTACTCACTTGGAGATGAAACACGCTCACTTTGTAATCCCATTTGTTT  
CTTTACACCCTTCTCAGGAAGTTCCTGGTATAATCTGAACTGACCCCT  
GTCTCAGAGTACACAGAAAAGCTGAAAAAAAAAAAAAAAAAGACAGGCC  
ACTCCAAGCTGGTAGGTGGCAGTTTTAATAAGCAAGGGCAACTTGCACAA  
GAGGCTTATCTTGGATGGCAGCGAGATGAATGGATCCCCACACCTGCCCA  
CCAAATCTGAAAAGCTTATAGGGCCCTCACTAGGTGCAGTAACATATGCC  
ATGCAGGTGTGTTCTGCACCACGTTACTATCTCAAGGCCATGTCCTTGGA  
GCAGCCTCTGGGAGTGGGAAAGCCAAGTGGAACTCACATTCTAAAGACAG  
TGGAAGGGAAGAGGAACCTGTGAATGTAGAGGTGTAGCTCATTGGCCAAT  
TGGTGGTCGTGCTTTTTTGGTAACACTCCCCAACACTTGAATTTCCATGC  
CTTGAGGGTCTCTAGAATTTTTGTGTGTCATGGAGCATTGCAGATGCTGCAG  
GTAAAGAGTGCAGTAAGAAGACACGGTGGACATAGACATTATGCAGATCT  
CCTTCATTTACACATAGGATTTGTCGTCCCCTTGGACTTCACTCACAAAA  
CACCAGTTCGAAGATTGCATTATTAATAAATTTTCAGGTGAAAGTAGAGCAT  
TAAACCAAGCACTAGAGCCCTTCAGAGAGTGAGGCTGTGTGTCACCTGCAC  
AGGTTCACACCCATGAATCCAGCCACGACCATGGCCAGAATGATGTTA  
AATGGTTTGCCTAATAATCAACAGTAATGCCTTCCAACCACAGCTGATT  
TCTAAGCATGATTTCTATCCACTCTTCCTTTACTTAATAAACTGACCTA  
TCTAATGATTCTTCAATGTTACTCTTAGATCAAAGAAATGACAGGACACAA  
ATGTTTGGAGAAGGAAAGATGCCAACAGTGACTGAGTGCCTGCCATTTGC  
ATGGTATTTCACTAGGTACTTTTACTTACATGATCTCATTTATCCTTATT  
CTAATAAGATAGGGTGTATTTAACTCATTCTGAAGTATGGATAATAAAAA  
ACCTAGAGATATTAACCAAGTGAATCAAAGATACATAACCTATATGTTGA  
GTCAGAAATATCAATGAGATATGAACATATAGGACTTTATTTTTGTTCCA  
TACTGTCCCTTTACAACCTGTTCTGTTGTGTAGCCTTTCCATAACTCTGG  
ATGAAAACCTGAGGAGGCCTTGATATCAGGGAGTTTTTCACTCAGTATAG  
ATTGCAAACCTCAGTTTTAACTTGAAAGCTGAAATATTCAGGTTTATGTAA  
TATTCATGTGCCTGAATGGATCTAATGTTCCATTTTCTCCCCTCCTACAG  
CTGAGCTGTAGGAATTGGCCACAGCCCTGGAAGAAGGGAGGGCCATGGTA  
CATTTCTTTCTTGCTCACCTTTTCTTCCAGTTATTAGCTGGAATGGGAA  
TGGTATTAGGTAAGAGCTGAAAAGTGGAGCATGAGAGAGTGTATGAAAG  
GTAAACAAGAATGGGAAATGTATTTAAATGAGTTCTGTGTTGGCTTAGAA  
TTCTCTTTATCTCAAGGATTTTTTTTTTTCTTTTTTTTTTAACCGTGGTTCC  
TCAGAAAGTTGGACCTGCACAATTTATTAGGGACTATGACCTTAGAGCAA  
AAGTGATGGACAGGGATAATGAAACAAGGCAGGAGAGAGAACCAAAATAA  
AGATGTTTTTTTTTGTGTCAGGTCAGCCAGGATAACTGGTTGTTTCGATCCAG  
TGGGACCTTCTGAGAAGCTGTATGGCATAAGCCTTTGAAACAATCATTCA  
GCAGAGGGAGGAGAAGCTTTTATTCATTGGCTTCTATCCACTTTTGTTTA  
AAGGTCAATTTCATAGGACATTATCTCTCCTAAAGTTCAAGGGTGAACAT  
GCATGAGTGCCAAGTGAGCTTCTGCTACCATGTACAAAAAGGCCAGGG  
GCAGGTAAGAGGAATGCAGCATGGGCTTAAAGTGAGGTGGTGCCAGGATG  
CACCTGCAGGAAGCTATTTAGAGCCTGTGCAAACTCATCACTGAAGTGG  
TGGCCAAAAATCAGAGAACAATGAGATTGAATGCATCTGTTATGATACAC  
TGGAGTGCCCAAGTATAGGTACTTTCCCAGGTTCTTTGGGGGAAATTTAAT  
TTTCCCTCCCCATTTCAAACCTCTGGATGTGTGCAAGGTTGCCTCTTCATC  
AGGTGCTCCCCCCCCCTTAAGACCCTATCTTTGGGAGGTTTACTTTATACC  
TCGTCTCCTCTCTCAAAGGTTGGATCTCCTTTGCCCCCTGGGTAGGACTT  
AAGCAGCCCTAGGCCAGCTCTCTATCCTACCCAAGCCCATATCTGGTCT  
TAGTCGTGTATTCTTTGGCCTGCTATGGAATGGAAGTGTAGTTACTTCTG

ACACCAAGAAGCAGTTTTTCCCATTTTACCAGCCAAATCACCTTCCCAAAC  
TTTCTTCATGCCCTTCACATTTTCCTTGGGTGGAAGTTAGACCCCAGACTA  
CCATGTCTTCAAAGCCAAGACATATATTAGACTTTCCAAGTAGTCTTGT  
TGAAGCCTAATCCTCCCTAGGCTGGGGACAAATGAGCAGTCCCTCACAGT  
CATGACATTAGTTCTCTCCAAAGAATTCTGACAAATCCCCACATTTTATA  
CCTAGAAAGGGGGTTAGAGGTATAATAGGAATGGAATAGACTCTCATACC  
TACTTTGGCAGTTCCCTCCAGAGTGGTCTGTGTCACAATCACATGAACCCG  
TTTTCAATTGGCATTGCAGTTGGAAATAACCACAGTGGTATGAACTCCCA  
TTCCCCACTGTACGTTGGCCAGTCTTACTGTTGGTTGCCTATCTTTCTGT  
CCTCTCAGACTGAGAATTAGTTTTCTCACACGCCCTGAAGGCAGTCCAAC  
CCTGGCTGGTTTTAGAGAGTAATTAGCGCCAGAAAATCTCCATAAATTGT  
AAGGTATGTAAAGAATACTCTTTAATTCTAATTCTTAAGTAGGAAACACT  
TCCATTAATTTTAGTAATATACAATACAATTTAGAGTGGAGGGTTTTGTT  
TTTATCCTTACTGTGGCCTCTAACAAAACATATATAAAATTGTGCATAATG  
TATTGTATTTCTTATCTGAAAAAAAAGAATTTGAAATAAATCCAGTAGTT  
TTCTGGTTTTTACCCTGACTAAAAAATTTTGAGGGTTGGGGCACTTAGGTG  
GTACAGTTAAGCATCTGACTCTTACTTTTTGGCTCAGATTGTGATTTCAGG  
GTCATGAGATCAAGCCCCACATCAGGCTCTGTGTTCAATTGCAGAGTCTGC  
TTGAGATTCAAGTCTCCCTCTTCCCCCTCCTGCTCATGTTCTCTCTCTCT  
TAAATAAATAAATAAATCTTTAAAAAAGAAAAATTTGGGATCCCTGGGT  
GGCGCAGCGGTTTGGCGCCTGCCTTTGGCCCAGGGCGCGATCCTGGAGAC  
CCGGGATCGAATCCCACATCGGGCTCCCGGTGCATGGAGCCTGCTTCTCC  
CTCTGCCTGTGTCTCTGCCTCTCTCTCTCTCTCTCTGTGTGTGACT  
ATCATAAATAAATAAAAAATTAAAAAAATTTAAAAAAGAAAAATT  
TGAGGGTTGAATTTTTTAAAAGTACCTACTAAGACTTTAACAGTTATTGC  
TCTGGATTAGGGGAAAAGAAATTTCTCAGAACTAAAAATTCAAAGTACA  
AAAGCATACTGATCTCAGTACGGATGAGTTAGAAATAAATGGAAAGTAGG  
AGAGGAGGAGAAAATCAGGACCAATATTCTAGCCTGGGAGGGGGGCCAT  
TTGTACAGTCATTCTGTGAATTATTTTACCGCTGGAAACATGACTTCCT  
AAGGCTAACAGTTTTAAGCACAGTAGGGATAATGCTAAATGGTAGTATT  
TTTACTGCAAAAAGACTCAGGTACAGTTTAGAACATGCAGTTCTGAGCAA  
CAGTGCAACTGGGCAAGCTCATCAACAACTGTAGTGTGCGTATGTAACG  
GAGTTGACCAGAAAACATGGCTGTGTCCCAAAGTTAACTCCTTCTGGATC  
ATTTTAATATGATCACTAATATGACAACTCAAAGTCATTAGTGGCAAGTT  
TTGCCTGAAATATTTCTGGGTCAATCTAAGTTGTTCTTTACTAGAAAGC  
TATCAAAATTACTTATCATTACTTATTTATTGTAATCACAAATGAGGAAGT  
CCCAAAGTGATTCTTTTACCAAGTGATCGCATTACCTTTGTGTCTAAAA  
TGGCTACAAATCAGATGTGTTTTCCAGGAGCAATGTTTTCACTACTATT  
AATAAGTAGCTAGTTTTATTAATCTCAGACAAAAGATAAAGAGACATCAT  
CAGAGGATATTTAGGATTTTGTCTTGCCTTGTTTTGTTTATTCCCTCCAA  
TGCTAATGATCTGGGGAAAAAACGGTGTTTCATTATTTCCCTCCTTCAA  
CAGTATGATATTATTTAAGTAATCACTGCAGCAGAGGTCCTCGTGTTTTG  
GAAGAGGCCCATTAGCTAGTGGCACTAAACAGAAGTCATTAATAATA  
ACCAATGCAGAGGAGTCTTGCTTCTGAAAATGATTAGCATCCCATTCTA  
GCTGTACTTTTTTTTTTTTTTAAAGTGATGAATTTAAATTTTAAAGTTG  
TGCCAGGTTTCTTTGGATACTCCCTTCACTGAGTTATCTCAAGTTGCACT  
GTGTCAGCCAGAACTTTTTCTGATACTGGAGGGTGCTCAGGGAACCTCC  
GGCTTCCACAAAGACAATTTCAATTCCTTTGAGCCATTCCCTTGAGGTT  
CTGCTAATGTGTCTCCTGCTAAGGGGAGAGTGATAAAGCTTCAGTCAGCC  
TGCTATGCCGGTTGCACAGCTGTCAAGAAAGTGAAAAAGCTAGACTACTAG  
AAACATATGGTCTGTGTCATCTTTTTGAAGAGGTGATGGAGCATGGTG  
GCCACCTCGCACCTGCCCCATCTCCACAACACACCTTGAATGATTCTGG  
CCCAATGTTGGACAGCTGGAGGTTCAAATTCATCCACCAGGCTATCATTG  
AGCATGCAACGGAGAATTCCATATTATAGAAAGTTAGCTGCTTGTGAAAC  
CACCTGCTTTCTTCCCTATTTAAGGAGAAATGAATATAGCTTCATTTGCC  
ACTTGAAAAATTTATTAGATCATTGTAGGGTTTGGGGGATTTGAGGGCCA  
ATTAAACTTTTTTTTGGAGATTAAATTTGGTCTATTATGATTATTTTCTT  
GGGAAAAACACACAACCTTCTAGAATACTCAACATTCTATTTTATTTTTT

ATTTTATTTTTTTTAAAGATTTTATTTATTTATTCATGAGAGACATACACA  
GAGAGAGAGAGAGAGGCAGAGACACAGGCAGAGGGAGAAGCAGGCTCCAC  
GCAAGGAGCCTGACGTGGGACTTGATCCCAGAACTCCAGGATCACACCCT  
GGGCTGCGGGCGGTGCTAAACCGCTGCGCCACCGGGGCTGCCCTCAACAT  
TCTATTTTAATTATAATTATTGTCTTGGTCACCACACTTATTATTAGATC  
CATGATTTACATATTTAAATTAAAGAAATGTTATTAGATACTCTTTAAAA  
TTTTTAAATGCAAGTTTCCATTATTCAGTAAGTAAATTTCTTAGTGAGGA  
GGTTTTTTTCTTTCTCCTCCCTACTGATGAAGCAACATTATACATTCA  
TAATTGTTATTAGTCGATAACACATTACTGAAATTATTACTCTCTAATCA  
ACCATGGATTTACTTGTGTGTCTGTCATCAGAGTTGGTTAGAACGCCCTG  
ACGATAACTTCAACCAGTTATAGGAAGATGAGTAAACTAGGGCTTCATCT  
GGTTGTGTCAATGTATCTGACTTAACCTTTGGAGCAAGGACCCTTCTGAC  
TGCTTCTTATACATGGTGCAGCATTACTGACATCTTTTGCCCTTGTTTTA  
AGGATAATTGCTGTACTTGCACCAGCCTGGGGTTTTCTTTTACAGCCACCT  
GCTATTCACATGTTCAATCTTTTTATCTAGAATCACAAAATTGCAGTTCT  
CAGGCTTATTGACACTGCCTAATATATGAATTATTTCTTCCAGTTATTCA  
AATCCTAGAGACTTTGAGTCAAGTATACTAAAAATAAGGTAGATGGGACA  
CCTGGGTGGCTCAGTTGGTGAAGTGTTCAACTCTTGATTTCTGGCTCAGAT  
CAAGCCCCACATTGGGCTCTGTGCTGGGCATGAAGTCTGCTTAAATGCT  
TTCTCTCCCTTTGCCCTCTCCTAACTTGCACACTCAATCTCTCTCTCTC  
CTCCTCCTCTAAAATAAAATAAAATCTTTAAAAATAAAATAAAATTAA  
AAAGTAAGGAGGCAGCATTACAGCATCTCTGTTAAATGGTGCCCTTGAGTT  
TCTAAAGCAGACTTAACTGAATATGTCCCAAACCTTGCATGGTTCCAATGT  
ACCATTCACCCAACCTTACTTTAAAAATCCTATAACGGGATCCCTGTGT  
GGCTCAGCAGCTTGGTGCCTGTCTTTGACCCAGGGCATTATCCTGGAGTC  
TCGGGATCGAGTCCCATGTACAGGCGTCCCGTGTGCAGCCTGCTTCTCCCT  
CTGCCGTGTCTCTGTCTCTCTCTGTGTGTCTCTCATGAATAAATGAA  
ATAAAATCTTTAAAATTTTTTAAAAATCCTATAACTATTGCAGGGAATG  
CCTGGGTACCAAATGTATTAATTATATCTGTTTATTAGAGACCTTTTCCC  
AATTTCAACATGTTTAAAGTAGAATTGCTTTTCAAAGTGATAATTTTGTTT  
TGTCTTTGCTAATTACAACTCTTTGACTTCAAGGTCTTATCTGATCAG  
TTCAAGTACTATGATCATCTCAGAGGAACCATAGGGAGACCCCTGGCTCA  
GCCTACCCCAAGATGGCTAGGGAACCTAGGAGCATCAGGAATGCACAGAG  
GGGACGTCTAATTTAACGTTTTGTTTGGAGAAGAATCTATTGATTAGGC  
TATAATCCTATCTTTCAAAACCAAGCAGTATTAGGAATAGAGGCCACAT  
GGGAGAAAACACATGCATACACACATACACACAGACTTAGACGCACATGC  
ATGCACACAAAGCTATGGAGGTGGAAGAGTCTAGTAGAAAATTTGGTAAT  
TTTGAATTTAAAAGGTCTAAAGGCCTGAGTTTACATTTTAGCTCACAAAT  
GTACCAGATATTTTTACATGAGGTAGTCAACATTTCCCTCGCTTCAGTTTC  
TCCTTATAAAAATAGAGATGTTATGCACCTATAGACTGACCACTTGCTCA  
TACAGCCATGTGTCAAATTATAGCTACTAGTGCTAGGAAGGAAAATGAAA  
TTATGAGGCTAGTGGCTGGATCATGGATTTTAGCTGAAGGAATAAGAATG  
AAAGTTTAGGCAGAATTTGCCTCTGTATAATTTATTTTGAACAGGATCAA  
CTTATTATTTACTTATTCTATAATAATATGTTAATTATTCAGAAAAACA  
CAAATTATTTTATATATGGGTGTATATACATATACACATATATGTATGTA  
TATGTATGTATATATATATATGGTATATATATATACCATATAAAGTATTT  
ATAAATGTATAAAATACTTATAAGTAAGTGGAATCATAATACGATCCTG  
CCATCTTGTGGTAGCGTGACATTTAACAGCCATATTATTTCCCCTGATGT  
AGTGGTTTTTATCTTAATGCCATGGCTCCAGGGCACCTTTCCCCAAAATA  
AGGAAAGCAAAAGAGGTAGATGATAGATGATAGATAGATAGATAGAT  
AGATAGATAGATAGATAGATAGATAAGAAAACAGAAGGTTTTTATCAGC  
ATACACATCATTTGGTGTATACTTATTTAGCAACTTTGATGCTTTTCTTT  
TTTGGAAGGATGAATGTAATTTTTTTCTTAAGATTAAACTCGTTTATT  
GATCTTTTAAACATCATTGATTAAGTGCTTTCTATATATTAGGCACTGTGC  
TAGACCTGAGATACGTGGTTTAAACAAGAATATGTGCCGTGCCTCAAACAG  
CTCAAGATCTAACTGAAGGTAAATATTGTTACAATGTAAGGGTGATGATC  
AAACGATTTACAGAAATTCAGGTGAGCCACCGGGCTCAGAATGGTGCC  
CTTGGGGGTGGGCACCATGGAGGGGTGGGGTGGGGGTAGGGAGGGTCTT

GAAAAAAGAAAACATGAGAACTGAATATTGACAATTAGAAAATAATCTA  
GATTGCGCTAGATTAATCTGTCTAGAAACCCCCAACCAGAGGAAAACCTG  
GGAAGAAATAAGGTACGGGAAGAAGTGAATCAAAGCAGAGGGAATATCA  
TGGGTAGAGAGGAGGAGTAAAAATTTTAGTCAGATTTCTAATGTCTTTAT  
GATTGATTTGCCAGGTATCCCACCAGGTGCCAGGGTGTACAGGAGACAA  
GGCACACATGCAAATAGTATCTTATAAGGGAGGTACATATGGGAGATGA  
GTGAGAAAAAAGGGGGAGTAGATTGTCCTGAAACAAAGGGATTTGCTCTG  
ATTTTGAAGGTGAGAGAAGACCAAGATGACAAACTAAAAATTTAATTTAAA  
GAACGAAGTAAAAAAGACAGTTAATCAGGGACACAAGGGAGCAGGGGAAG  
GATGGGTAAAGAGGATGAACTAGGCACTGGGGACAATGTGAACCTTGGAAC  
TACGTACGTTCCACATTAATTAGCCTTTTCCCCAAGAAACAGAAGGAAAT  
TGGACGTGAGTAGACCAGGAAAATGCAACAGTAATGTAATGATGTGATGGG  
CAGAAATAATGTCCACTCTCCAAGAGATTTATATACTAATCCTGGAACCTG  
TGAACACTTATCTGGTGAAAAGCTAATTAAGGTTGCAGATGGAATTAAGAT  
CGTTAATCCACTGACCTTCAAAATACAGAAATGATCCCAATCTAATTATGT  
GAGCTCTTAAATGTAGGGGAGGGAGGAAAAGAGTAAGGTAGACAGACGAG  
ATAAAAGAAGGAGGAAAAGTCTAAGAAATGATGAGGAATTGACGCATCAC  
TGTTGCCTCTGATGATGGATGAAGGAGGTCATGAGCCAAGGAATTTGGGT  
GGCATCAAGCAGCTAGAAAAACGCAAGGAAGTGGCTTCTCCTGTAGAGCCT  
ATAGACAGGAACACACCCAGCTCCACTTCTTGATTTTAGCTCAGTGAGAT  
CTGTGTTGGATTTCTGACTTAAAGAAGTATACGAGAATGCGCAGAATACA  
TTTTGGCTGTTGTAGGTCACTGAGCTTGTGAGAATTTGCTTGGGCAGCAA  
CAGAAAATTAGCACATTAGATGTGTTGTCAGTGGGGAGATTAGGGCAGCT  
CTCTAGGCTGTGTTTTGGATTTTATTTTTTGTGGCCAACAGGGAGCTATT  
GTCTATTTTCAGGAAAGAAGATGACATCGTCCAGTTTGCATATTCAAAGAT  
CACGCCAACTGGCCTCACTGAGAATTGGTGAGTGGGAGCAATAGTGGACA  
CAAGGAAACATGTGAGAGGGACTCTTGCAATTACACTAATATGCAATGGTG  
ATTTGGATTAGAGCACATGGCAGCTGTGAGAAAAGAGTCATATCCACTCA  
CCTAAGAGGTATGTAGGCGGGAGAATTGACAAGGTGTGCTACCCGATAGA  
TGAGCACGTTAAGACGAAGATTTATACCCATGCTAAGATTTCTGGTTTTCT  
GATTAGGCACAGTATATTATTATTTATTGGAAAGTGCTTTAAATAATGGC  
AGAAGAGCATACTTGGTGGGAAATGCAAATTCAAATTTGGCAATGCTGAC  
TTCAAGATATTTGAGAGCTATCCAAGTAGAGATGGCCAATAGATGGTTGG  
GTTAGACTGGTTTTGTTGTTTCAGCAAAAAGATACACTTTGGACATATGTAT  
ATTTGTGAGTTGCATTTATGGGATAAAGATGAACCATGACATTGATTACA  
TTGCTTGTGAATGGTATTAAAAAAGGACTGAGAGAGAACTATGAGGCTT  
CGCAGCATTTATGGAACATAAAGATGAAGAGAACTGGTTTAGAAAAGGG  
GAAGGGGCACCAGAAATCAAATGTGTAGTGCTCCATAAGCCAGTATAATT  
CTCTTGAAGCATGGAGTGGTCAAATGTGTTACAAGCTGCAGCAGAGAGAT  
CCATAAACATAAGGACCAAAATGTTTCCATTACATTTATTGAAATAGATA  
TTATGTGAGATATTGGCAAAAGTATTATTTATGGAGTAGAAGAGAAGAAT  
CATAATTTGAGTCAGTTAGGAATGAGTGGAAGGGATGAAATGATTATAGT  
TGGTAGGGAAAAAATTGAAAGAAAAATCTGGGTAAACTACATTGCTTTCTT  
GCTTTGTTTTTCTGTCTTCATGTTACTTGAACCTTGCTTCAAAGAAACCTT  
GGTATTGGATAACAACAGAAAAATAAAATGAAACCAAAAGTCAAAGAAAA  
CCATGCTTGGCATATTATGACAAACCATCTAAAACCAAAGATGAGAAAAA  
TGTGAAAGTGTCATCTATATTGGGGGCCATGATTTAAAGACTAGAGATG  
ACTCAGCAGAAGACGTGGAGTCCAGGTGACAGTAGAAAAACATCTTCAATA  
TAATAGCAAAAGTAGTATCAACTCAGAACCTTTATATCTAATGAAATAT  
CCTTCAGGAATGAAGGAGAATTAAACATTCTGAGTTGTAGGAGTTATAA  
TAGAATTAGTTGCTCCAAAAGAAATGCTAATATTATTATTAGTCTAGAA  
GAAACTATAACCATAGAGAGAGTTGGAGATTTAAGAATAAAGGAAAAGCC  
ATGGAAGGAAAAAATATCTGAGTAAGGAAACACTATGTTTTTTTCTTCCT  
ATATTTTTTCAAAGTATGAAGAGTACTGAAAGCAAAAATTTTGACAATGTT  
CAATGTTTTGCAAATGTAATATATGTATGACAACATGACATAAGGGTTG  
TATAAAGTAAAGTCATTCTATGATTGTAATATTTCCAAACTTCAATTGA  
TTTGGTAAAAATAAATGTGAGACTGAAAAATTAGATGTGTGTATTATCA  
CCCCTAGAGTTACTTCTAATAATACAAGTAGAGAGAGCCTAAACCAATAC

ATAGACTGATTAAAATAGAATACTAAACATATTTAAATAGTCTATAATAA  
AAGGGTATACAGAAGAACAAAAAGAACATATAAACAGAACTTTTTTAAA  
GTGTGAGACCCAGTCTAATCATATCAATGTCCCATTAAATACCAATGGCC  
TAAAGACAAGGACTCAAAGTCAGAAATTGTCAGACCGAATAACATTAACA  
AAACCCAATTTTTGGGATTGTTCCCCATTATTTGAGAAACATTACCATTA  
TTTCCAATGAGTTGTCAAACACACTTGAAATATAATGACATGGATGGATT  
AAGAGCAAAACACAATGGCAACAATATAACATGTAAATGCTAATCAAAAT  
AAAGATGCAGTGGCTATATTAATATGAAACAAATTCAGAAACAAAATGAC  
AGAGGGGAAAAAAAAGAACATTTTCATAATGATTAAATGGTCAATTCATC  
AATAAAACATGGGAATCCTAAATGTTTACCCAACAAAAGTATTCAAGAAT  
GCATAAAGGAAAATAATAGAAGTGAAGAGAAACCAGACAAGCTTATCAA  
TTTCCTCAGAGACTTTAACATTCTTCTCCCATCAAATGATAGGAGTAGAC  
AGAAAAGTCAGCAAGTATATAGGAGATGTGACAACCAAAAACAACCTAATTA  
ATCAACAGATGACACTCAAAATTC AACATTTATCTATCATAACAACGTCT  
AGTTCAC TAGAAGTTTCTTTAAGTTCCTGGAAAGCATTGACAATAATAAG  
AAACTACAAC TGGCATAGACTTAATGGTTATTTTTATCCCCAGATCACAA  
ATATGGCAACACAGTCCACCACCACCAATCCTAGTCAGCACGTTGAAATA  
GTGATGGTAATGTTTAGACCTCTATGAGAGAGAGAGAGAGAGAGAGAGAG  
AGAGACTAAGAGATATACTATATACTTCATGCCCTATACAAAATTAATTC  
AAAAACAGATCATGCACCTAATTAATACACAAAAATATAGAAAAATTCAAA  
CAAAACACTGGAGAAAATGTTTGTGGCATTGTTGGTTAGGCAAAGAGATCTT  
AAGATATAAAACCAAAATCACAATCTATAAAAGTAAATGAGACTCCATTC  
AAATTAAAGACTCCATTAATATTTGCTCTGTGAAAGAAAATTGCTAAGGG  
AATGGGAAAACGAGCCATAAAATGGGAAGAAATATTTTTCTGTTATACAT  
GTCTGATAAAAGACTTGTGTCCAAAATATATAAAGGTCTCTTACAAAATA  
ACAATATAAAAATAATTTAAGTTAAAAAGAGAGAGCAATATAGTCAGACA  
CCTCAGCAAAGGAAATATACAGATGGCAAATGACCATATGAGAAGATGCT  
CAACATTATTAGCCTTAAAAATAATGTAAATTTAAACCACAACAAATACT  
GCTATACAATTATTAGAATGGCTACAGTTAAGAAAGAAAAAAAAAAGAAA  
AATGAAAATACTGAAATCCAACAAGGATATATTATATAAAATTTTAAGGC  
ATATTTTCATTCAATTGTTGGTGGGAATACAAAATGTTTGTGCTGCTATTA  
TAAAGTTAAACATGGATTTACCATATTACTCACGAATCTCATTCCTAGAC  
AGACCCTTTGGTAATTTCTACCACCACCACCACCACCCTCATGTGGTAA  
ACATCAACCAC TTTCTGTCACTAAAAATTAGTTTGTATTTCTAGAAATTG  
ATAAAAAATAGAAGGTTGAAGTATATACCTTTTTTGATGTCTTCCACTCAGC  
ATGCCTAAGTTATTAAGATTCATCCACGTTGCTAGGTGTATCAATAGCTC  
ATTCGTTTTTCATTGACTAGTATTTAATCATATGGAGATAGCTTATTTTTT  
TTAATCCATCCTCTCTTGGTAAACATTGTGTGTGTTGTTTCCATTTTTTG  
ACTATTACGAATAAAGCTGCGATGACCATTTGTGTATGAGTCTTTGTACG  
GACGCATGCTTTCA TTTCTCTCTGTTAAAAATGTAGAACTAGAATGGCAC  
GAATGAATGGCAGATGGATATTTAACTTCCTAAATAAACCATCAAATTTT  
TTTCCCAAACAGATGGTACCATGTTACGTTCCCACCAAGAGTATATTCCA  
GTGCCTTCCGGCACTTACTATGATCAATCTTTTTTCACTGTAGCCTAATTC  
AAGTAATGGTTTCTCATTGTGGTTTTAGACTGCATATCTCTAAGGACTAA  
TGGTACCAAACATCTTTCTTTTTTACCTACCTATGCTTATTTGTTATATA  
TATATATATACACACACACACTATATTTACTATATATATGTATTTACT  
ATATATATTTACTATATATATTTACTATATATATACACTATGCCTGATCA  
AATCTTTTGGCCATTCTTTCATTATGTTATCTGCAGAGTCTGTTTAAAGAC  
TGGTGACAATTCTAGTCCATGGTTATGCTTCTGAAAGCGACAGTTGGTAA  
AGCCACACATTTTTGAAGCTCAGATGGTGCATTACGGCCACCACAACCAT  
TTCTGAAAGCTAGTCAGTCAATCAACAATAAGCCCACCTGGAGAAGCACA  
TTCCCATACTTCCATAGCTTACATAGATCCCCTCCTGACTATAAAAGCCT  
TGAACCTTACCCTTTTCCAAATCCCTATTAAGATAAGCTTCCTGCCTTGCA  
ATCAGGGAAACCATGCCTAAAAAAGCACAGCTTTGCCTCCTTAAGTAAA  
TAACAAATTCAGGGAGCCTGGCTGGCTCAGTCAGTGGGACATTCAACTCT  
TGATCTCAGGGCTTGAGTTCAAGCCCCATGTTGGGTGTAGAAATTACTTT  
AAAAAAATCTTACAATGTAAGGAGTGAATTCAGTTTTTTTTTTTTTCAA  
ATGTTGGACGGCGTCTCTTCCCTCCACACCATTTAATTTATCTAATTTT

TTTCAGTATGTTTTGTGATTTAGGAGAAATCTGTTTTTCTTTCCTCAAA  
GAAAGAAAATTTCTTCCTCAATGTTTGTGAACGAGTCTTCTTTCCTAC  
TTATTTAACTATCTTTATCATAAACTAAATTTTTCTTCTTTCCTACTT  
ATTTAGCTATCTTTATCATAAACTAAATTTTTATATATTCTTGACTCTAC  
CTGAAGCACTTAATAATGGTTTTCTTTCGATTTAAAAATAAGTTTTTTTT  
TTTTTCTGGAAAAGCAGGTGCTCATTTGCTACCAAAGTCCCATCCCCTT  
ACCACTGGAGTCTTCTTAAAAAGTCTCACATAATTTAGAAATTGAGCTC  
TGATACAACCAGAGGCACTCAGCTTATTTATCTTATAGCTGCATGCTTTT  
GGCTCTTCCATTTGATCCTGTAGCAGCCTTTTATAAGACTCTTGAGCTTG  
GTCGTAGAAAAGTAGCAACAGAACAGTGGATTGCAAAAGAGAAAAAGTAA  
TGCAGAAAGAGAAAAGTAGAGAGATGCTTACTCTCATGGCCAATCAGGAAA  
TTTTTATTTCCAACCTCAGAGTCTGTGATGTTTCATAAAATCAAGGATGTT  
GTTATTTTTCTCTGCCTATCTAGCAACTAGAGGGATGACTTGCCTGTGAT  
AGACATTGAATATTTGTGGGACGAATGAATGAGTGAATGGGTGAGTAGAT  
GATTTTTGTCTTCCAGTTTATATTTACGTGAAGCACATAACAGGATCAAA  
GTAAAATACATTATTTCTTTATTATGAGTGATTACAAAAGTGGTTGGGTGGA  
GAGTCCCACAAATAGTATTTGTGAGTTAAATATAAAAGTTATACTATAGC  
ATCAGTATAAAGTTCAGATTAGAAGTTATTATTTGCCAATCAAGTGGTGTA  
GACTGTGATGACCTGGAGAGTTGTAAGTCACTGTGGGCTAAGGCAGTCTA  
CACTCGCTAGATACAGATGTACATCTGGGTTCTGAAAGGAAATTGATATT  
TTTTTAACCATGAAGCTCCCTCTTCTGATCTTCTTAAATGTGGTATTTGT  
TGCTGCTTCTTCCAATTATTGTTTTTTTTTCCATTAAGTAGCAGCTTGGT  
CACCTACCAGCTCAGGGTAGCACTGGTCCCTTGTGAGAAGAGCTCAAAGG  
CCAACCAGAAACGAACAAAGAAAATGTTGTTCCAGATTCTTATTTTGAA  
AAGGAGTCAGCACATTCTCATTTCTGTTCTTCCAAACATTGTCATTTCCCC  
AATTCTTAACATCTTTCAAACCTTGAAGATAATCTCTTTGGAATATAATA  
GTTAATTCACCTCACAGATACACATATTGTACTCTCTTTTTGTTCTTTTTA  
TTGCTACCCAAATAATTGCAGTAGAGTACAATAATTTGATATATTAAAA  
GAACCAACCAGAAGAGATCAAGGAGACATAAAATGAAATGTGATGTAGTA  
TCCTGAATTGGACTCTGGAACAGAAAAGGAACATAAGTAGAAAACCGGGT  
GGAATCCAAATGAGGTCTGAAGACACTACTAATCGTTAATAATAAGGTAC  
CAAAGTCAATTTCTTGGTTTTGACAGAAGCACCATGAAAAAGTAAGATG  
TTAGCATAAGGAGGAGCTGAATGAAGTGGATACAGGAACCCTTGTATTAT  
CTTTCGAGCTGTGCTGTAAATATACAATCGTTCTAAAAATATGCTTATTA  
AAAATTCAATAGGTAACCATGCATTTTCAGTAAGCATATTGGAGTATTTTT  
AAATTCATTATCTTATCTTTACTTCTAAAGCGAGACAGTTTTATTTCATTA  
TGTTCTGTTTGTTTCGTGTAGTGAATGGAAAGAACTCCAGAAATATTTCC  
CAACTGATTGAATTATAGAAGATCCAGGAATGTATTTGTAGTTGTCCAAC  
AGAAGACAGTTGTACCCTCCACTGTGGCCACTAGGTGGAAGTATCAGCAC  
ATCAGTAAAAATCCACTCTTCCATCCGAAGTTAAAAAAGGAAATATTTCC  
TAACCAACCCCTTTGAAAACAAACGACCTTTGAAAAATGCTATGATATGT  
CATTATTATATAGATAGTCGGAGGGAGAATTCCTAGTATGGTGATGAAGA  
TCAAGAAAGATACAAACTGGCTGTGGACAGGAATCCAGGATACTAAGATA  
TCCAGAAATAAAGTGGAAAAAATCCAGCCATTTATTTTAAACATTTT  
CAGACGTGAATCTAAGTGTAGTTGGACCGATAGCACATCTGGAGAATTAA  
CAGACATCTATCTTTCCCCAGACGTAAGTGTAGCATGCAATGTCTGAACC  
TACCAAGGCACGGAAGTCTAAAACCATCAGCACGATGCTTCAGTGCCTCA  
GTATGGGTGATGTGTTTTAAGTACAGACAAACCATTTAGACTGGATGCTAC  
CATTTACAGGACCAATCTGCATTCTTCCCTGCCACTTCTTTTTACACCTT  
GAATCGTTCAGGAAATAAAAGCACTTTCTGCTATTGGCCAATGCAAGGTG  
TCACTAGGAAGGCGATCTCTAAAACCCAAAAAGAGGAATTAAGAATAGAT  
TCCTATCTCCAAGAGGAAAAAAGCTGACTTTGAGGTTTCCAATTC  
ATTAATTTTCAATTTGTTAGTTTGAGCAATCAGATATTTGTTATGACTTGGA  
TACTGGGCCAATCAAATTTCTGTTCTCTGTGTAAACTTTCTCCCTAAAG  
ATTGATACAGGTAGGAGAGGCAACCAGGACTGTTTTTCAGAAAGATTATAT  
GAGACATAAGTCGGCACAAAGTAAACCTAGTGATTACAGCCATAATTTGA  
CAAATTAATATTTATGGAAGTCACTGCCACGGACCACATTATGTTAGATGC  
TGATGGTACTGAAATACACAAATAATGAGCTGTCCATTTTCTGGAGTTAT

CACAAAAGTTATAAAGCTCTTTAGATATGTGTCGTGTGTAAAATACATCT  
TTACCTGCTTTTCAAATTTAAAGATGCTAGAAATCTGAGAATTTATTCT  
GTCCCAGTTGTCAGGAAAATCCATATCGATACTGGCTCTTTTATTTTCT  
TTTAAGGATTTTATTTATTCATTCATGAGAGACACAGAGAGAAAGGCAGA  
GACATAGGCAGAGGGAGAAGCAGGCTCCCTGCAGGAGAACCTGATGCAGG  
ACTCGATCCCAGGACCCCGGAATCACGACCTGAGCCGAAGCCAGAAGCTC  
AACCCTGAGCCACCCAGGTGCCCTCTACTGGCTCTTTTTTTTTTTCAAT  
AATAAATTTATTTTTTATTGGTGTTCATTTGCCTCTTTTATTTTTTATT  
TTTTTTAATTTTTTATTTATTTATGATAGGCACACAGTGAGAGAGAGGCA  
GAGACACAGGCAGAGGGAGAAGCAGGCTCCATGCACCGGGAGCCTGACGT  
GGGATTCGATCCCGGTCTCCAGGATCGCGCCCTGGGCCAAAGGCAGGCG  
CCAAACCGCTGCGCCACCCAGGGATCCCAATTTGCCTCTTTTAAATAGAG  
AAAAATCTACCATCCACAGTTGAAACATTGAACATTTAGTGCTAAACATAC  
AACACTATTTGTCTCTAGCAATAGGGTCTAATTACTTTTTCTTTATTTGCA  
CATATATTTTCTGCAGTTGAAAATTTAGACAATGTCTGAGCAACACTTCCC  
ACATACACTGCCAACACAGCCATGGCAATGGTGCGCATTTCAAAAAGAT  
GCATTTTCGTTTCTTGTAGTGATGTCCAACCACCACATTCCCCATTATA  
CTCTCCTTTGCTTTATGTCCATATCCATCTATTTAATCTTTATCCAGGTT  
ATTTGGAGCAGCAGTTCCCATAGTGGAATTTTCAGGGATTAGGCTTAAT  
AGAGCCAGTCTTATAATATCTGCAGACTTAAGTGTGTAGTTAGAAAGCTG  
TTCTTCAGAAATGTAGACAACCTCTGTGAATCAAGTTCTCCCAACCGTAAG  
ACAGCATTTTTGGTAAAAAAAAAAAAAAAAAGAAAGAAAAAGAAAGAAAA  
AAAGAAAAGAAAAGAAAAAGAAAAGAAAAGAAAAGAAAAGAAAAGAAA  
GAAAAGAAAAGAAAAGAAAAGAAAAGAAAACACTTGGATAAGGACACCTG  
GGTGGCTCAGTGGTTGAGCATCTGTCTTCGGCTCAGGTTGTGATCCTGGG  
GTCTTGAGATCGAGTCTGCATCAGGCTCCCTGCACAGAGCCTGCTTCTC  
CCTCTGCCTGTGTCTCTGCCTCTCTCTCTGGGTCTCTTATGAATGAATAA  
TAAAACTTAAAAAAAAAAAAATAAAAAACCTAGACAATGACTTCTGGACAC  
TTATGATTGAGAAAGATAAGATGTAATATATGCTCTGGAAAAATTCTGCG  
AAGCCTTACTCTGTGGGTAGGAGGCAGATCAATGGGCTTCTATGGGGCAA  
CCTCCCCAACAAAGGGAGAGGAGACAATCCTACTGACCCTTCAGCGAGGAG  
AAGAATGAATGAGAGGCCAGGAAGGTGGCAACAGATGCAGTGGTGTGTGA  
TTCTTAGACATAATCTAGATTTTCTGACACATTATATTTTACATATT  
TAACATATAAAAGGAAAAAGTGTGAATCTAGATTGTTTTTGTGTACTG  
TTTTTGTTTTGGGTTTTCTTAATATAGCAGAAAATTTTAGTTACTTGACGA  
TATACTTAAAGGCACCTATAACAAACAAATAAATGAGAAAATAGCATTTT  
ATCCTGTCATTTGTGCCCAGAAATATGTCCAGTGTGGGGACAGACAAATG  
TTTCAATATAATTTTCACTGTTCAACTACTTTCCCTGATGCTGTGTCCC  
TGGAATCTGAATTCCCACAAAAACAGTCCTATTTTTGTTTTGAAAGAAA  
GAAACAAAGGTTAAAGATTGCATTGTTTGATTTTTTTTAAAGAACTGTTT  
TTGACTGATTCTTTTCAGTTTTGTATATACACCATTAATAAAAAAAAAA  
ACTAATGAATTTCTGAAAATACAAAAGAGCAGCTTGTTCTGTTGTCTATT  
AACTCCCAGAGCATTAGGTTGCCATTCTCTTATATAATCTCTGCTTGT  
TTATTTCCCAAACATTGATTTTTTAAGTGCAACACGTTGGACTTCATCACGT  
CTATGCTCCTTGAGAGTTTGCTCTTGTATTTAATTTTTTCTTCTAGATAG  
AAGATAATTTTGAAAAGAAACCATCTGAACGGCCACACAGCTAAACAAA  
ATCTGCAGAAAGTGGGTTGTTACTGGAGGCATCTTACCCAGAAGTTTCTG  
TTCTGTAGGGTTATGTGTTTTGGGAACGTCCCTGTAATGCACTGACCAGTT  
CTTGCCAGGACACAGTTTATACCTGATGGAGAAGGAATAAGCAAAGGAG  
AAAGGATGATGAATGTGTGCTCGCTGCTGCAGAAACCTTTTCCAAAGGA  
CTAACACTAACAAAAACAAAGGCGGGTTAAAAAAAAAATGTGGTGGGCCTC  
ACCTCGGACCAGGTGAGTTTACAGATTCCCCACCTCCCCTGGCCATGCG  
TCAAGAAGGCTGGGCCATCCCTGAATTCACAGCCAGGGTGGTCGTCTGTG  
TGCAGAATGTAAAGCAAACAAGGGCAAGCTGTAGCCAGATGTGGGGGCTT  
TCAGTTTCACTGGCGGTTCTGGGGTACTTGGAGTCAAAGCAGCTCACGC  
ACGTTCTTGCTTTCCACCAGGAAGCTTGGAGACGTGGAGGCTACAGGAAT  
CTGATCAGCCTTCCGTCCCCAAACTGGCCTTCTTATGCAGCAAAGGACAT  
AGGATCACTCCTCCAAGACTCCTATGAATGCCTGTGAAATACCAGCAACT

GTGTCTGAATCTCACATCCCTCCAAAAATCTGATAAGCCAATGGATCTAC  
CTGATGGGCCAAGATCCAGTAACATATTTCTGTGAGGTTGTGTCCATGC  
CCTTGTCTGTACACGGATTTCTGGAGACGTGCCATCAGTCCTTTCTACTA  
AGTAGAGATCATTTTTTGGTTATTACATCTTTAGAGAAATGGAAAGAAAAT  
TCTTTGCAGAGGCATCTCATTGTCTCTGTCCCTCTTTTCTCCACACCCAG  
CTCCAAAATCAGTAGCTTTGTTCTACTGACTTCTGACCTGTTCTTTTCATT  
TTGAATTTATTTCCCTCTAACCTCAGATATCACCTCACAAGCAAACACCA  
GGAATTTTAAAAAGCATATTCAGGAACATGGTGTTGTTATGTTAAATCAG  
CCTCGCATATTGATTAGCATTTGCCTTACCTATGAATTTAAGGAAGAGGT  
AAGAGTCAGTTCTTCTGGTTCCGGAAGATTAGTCCAACCTTTATGTTCA  
AATGTCCAGGGTCACCTATCTCTCCTTTCTTCTTTCTTTTCTTTTTTTC  
TTTTGTTTCTTTTGTCTTTCTTTCTTTCTTTTCTTTTTTTTTTTTTTGG  
ATTCTTTGTAATTTGACTGATTCACATTATCTCTGTGTCTCATTCTAAA  
ATTACATCCTGAGTTGGGTGAAATAAAAAAGATACAATTACGATCGACTA  
GAACAATGAACTGATTTTTGCAAGTCATTCCCTTTCCAAGCAGGCCTTGA  
ACTTACCTTTGTGCACTGAAAACTTTATTGATGTTCTTTCTCTAGGTACT  
GACCAAAATGAAACCAAAATTTCAATTTTACCTCATTGCGAGTCTGTTTACT  
AAAGTCACTAAATCACCTGCTTCTGACCTCAGCTAGAAGTTCAAACCTT  
TTTTACAGCCATTAACTTTTTTCAGCGTCCCACCATGCAGATGTGCCTTC  
TCTGGCTTAATCTTTTCCATACTGGATGATACAGCAGGCCTCCACCCGAT  
GTGGGCTTTGTGACAGCAGGAAAATCTCATCCATCAAATCCAATGTCCCC  
ATTTTGTGTGATATGATAAATTCAAAATACTTATTTTGCATGGCAAAGA  
GTCATAAGTTTGCTGGCAATTAAAATTGGAGACATGGGGAACGTACGTCT  
CTCAGGTCTCACCAATCCCTTATTTCTTTGCACACTTGTTAAATTCACAT  
GTGAGTCAAATTCACATAGGAGAGTCACAACCTATCTATGGTCTCATAATG  
CCTGTCCACTAGCACAGCACTCTAAATCATTTTTTCACACAAAACCGTGTC  
AAGGGCTGTGTTTGATATCTAAACTAAGAAAGAAAGGAGAAAAGCAATA  
AACTAAGAAATTGGAGACCTAAGCTTATTTTTTTTTGTGTGTGTATTACAA  
GTGGGGACAATTGCATTTTGTGGTTCTGAATCATTATGGACTTTTTTAA  
AAGCAACACTGAAGGTTAACATGTTTATTGTGCATTGCCAGACACTAAGT  
GCTGAGATATTTATTTACATTTTCTGTTTTGATTTTTCCCTAACGTGATG  
AGATGGAAGAATTATCATCCCATTTACCAGATGAAAAATGGAAGAACAG  
ATGCTTTAGAAAAATAACTCAGCCTCCTCTTCTATTCTATTTGGTCTCTG  
CATTAAAATTTTCAGTCTTTGGGTGGGTACATATAATTACGGGAGATTCA  
GAGGGCATAAAGTATCTATTTGTATTTCTTTTGGGAAAAATAAACTATA  
TTCCGACTTTGATTCTTTTCAGATGGAAAAGTGATTTCTTTGGAATGTTGA  
ATGATTTAGTTAACCATGTAGAAAGGGTTGCAACATTTGTCCACAGAATG  
GAAGGCTTGCAACTTTTCTGTGTCCCTCCCTCAACGTGAATATTCGTGAA  
GAAATTTGGGAAACATTTTGTGTAGGTGCAGATAACATTTGGAGTCTCAT  
TGGCTCTATTGTTTCCTGGAGAAAATGTAATTGTTGATTCTTAACTGATC  
GTTTAAAAATTAAATTCCTCCAAATTTATTCTATTTCTAATTGCAGATTC  
CAGCTGCCATTGGATTGGGTTTTCTGTGTTTACTTGTTCCCAAAGTCT  
CTGTAAAAGATTTTATTTCTCTAGGCAACCAGCTGGTTTTTCACATAGAT  
AAGGTCAATTAATTTGACCTTTGTTTCAATATGAAATGCATAATAAAAGC  
TAGTGCCCCAAAGACCGGATGTGGCCTTTCAGAAAAGCTACTTGCCAGGA  
CAGGGAACAATAATTTATTGCCTCATAAACCCAGTTGAAATGCTTGTTG  
CTGAGCATGGCAATGACAAGGAGACTGTGTGTCTTTATTTATTTATTTTT  
TATTCTGGGCCATAGAGATGGGAAAAAGAACCCAGCACCTGTACTATTGA  
AGATGAGAAGTGGCAGGGGCAAAAATAGGGCCGTTGTTTCTTTAAGGATC  
TGGGGACTCTAATTTGCATGTGTGTTTTTCCGCAGCTTGTTTGCCACTGA  
CAAAAATTCATAAATACAGGCTCAGAGAGTTTATTATTGACTTTTGACTG  
TAAGAGCTCATTATTAACAACTTCCCAACTCAGGCTCTGAGAGCTGT  
GCAAAATTCATCCTGCAGCAAGGTATGGAAAAGAAAGTTGAAATTGCCATT  
TATGATCAATATCAAAATGACTAGTATCTGCAGCTTGATTGATTGATCGA  
CCCAGGAATCCAATTTTAACAAATTTATGAGGATTCAAACTTTTTTGAAA  
AGATTTTATTTTTTTTATTTGATTGAGAGAGAGAGAGAGAGAGAGAGAG  
CTCAAGAACGCACAGGGATAGGGGCAGAGGGAGAAGGAGAAGCAGGCTAG  
ACACGGGATCCCAGGACCCTGAGATCCTGACCTGAGCTGAAGGCAGATGC

TCCACCAACTGAGCCCCCAGGCACCCAGGATTTTAACTTTTATAATCTA  
ACTGTATTACCATCATCTGTATACCATTAACATCTCTCACATGTGGTAT  
GTTAAGAGTGTATTATTCATTCTTCACATGAATGTGTTATGATTGACATT  
TGTATCTAATATTTTTCTGTTTATTTTTATTTTTTTTTTAAAAAGATTTTAT  
TTGTTTGAGAGAGAGAAAGAGAGATAGTGAGAGAGAGCACAAGCAGGAGG  
AGGGGCAGAGGGAGAGAGAGAGAAGCACACTCCCCACTGAGCAGGGAGCC  
CAGCACAGCTAGATCCAGGGACCCAGGGATCATGACCTGAGCCAAAGGTA  
AACACTTACCCAAGTACCCAGGTGTCCCTATTTTTCTGTATTTAA  
ACAACCCTAGATGAACCTCTTTACTTAAATCTATCATCAGCCCTTTGAT  
TACATCTTAGAAATGGGCTCATCTAAGTCAAAATATGTAGCTATTTCTTA  
GGCTCTTGTTAATGATTTAATAAGTGTAATTCAAAAAAAAAAAAAAAAA  
AAAAGAAAAAAAAAATAAGTGTAATTCATCATCTCCAGCCTCCATGTATT  
CAGAAATCCAGTATTTTAGTGTTTCTTTTGACACTGGGCTTTTCATATAC  
CTTGAATGATGGCACGCCGTAGAAAATACTTGCTCCTTAGGATGTGCCGT  
TCATTCTTAAACCAACCTTTTCCAGTTCTGCAGATGCACTCACTGGGAA  
GCTTTTCACGGATGCATCCATGCAATTTTTGGAGACCTGGTGGCAATTTG  
GATAAAGAGCACTTTCTGTGTAATAATGCAATAGGATAAGAACGCTTTCC  
AAGTAATAATGCAATAGGATGAGTAATTCTGTGTTTCTAGAGAAGTTTAC  
AGTGCACAAGGTACCACCGTCTTTGGTGTGGAAGAAACCCAGAAAGAGCA  
ACCAACAGGGATGGGTTTAGAAAGAGCACAGGAAGGAAAATGAAATGATG  
CCAAAGACAAAACCTTATTTCAAAATTTTAGCACAGCTACTTGCACATAC  
TTCTGATGAAAACATAAAATAGAGCCACCTTTCTCAAGGGTCAATGGCAA  
TACCCATCAAGGGCTTGCATTGCAGATACTCTGGCCCAGCAAGAACAATT  
TGAAGCATTATCCCAACAAAAGCATTAGGTATTCCGAACGACTATTTT  
AGCAGAAAATAGTCTGCACAAAATAAAATCGTATTTATGTATTTTGTAGAG  
ATTTTCATAGGTAGACAGACAAATAATTCATACCATGTATTTTGTGTGCA  
ACCAGCCTCTGCACTTATTCAATGCATCCTAGTAGTGGTACTTCTGTG  
TGTGATTTTATGGTGATGCTAAGTTTTATTCTTTTTCAAACTCCAAAC  
ACACAAACGTGTTCTGTTTTTAAAAGAAAAGCTACCACTAAATGCCTTT  
TTGCAATATCTACAGATGATTTGATATCAGATCTTTAAAGGGAGGGGGA  
ATCTATTTTCCTATGTTCCCTCCATCCAGTTCTCTCTGGCCCTTGCCACC  
AACACCTGGACCTAAGGTGAGTGCCATTAACACTATATTTCAAATATATT  
ATTACTTAAATAGACTTTTTGTTGACCAACTTAAGAACCTAACCACAGGG  
CAGCCCCAGTGGCTCCACAGTTTAAACACCCCTTCAGCCAGGGTGTGGT  
CCTGGAGACCCAGGATCGAGTCCCTGCATCAGGCTCCCTTCATGGAGCCTG  
CTTCTCCCTCTGCCTGTGTCTTTGCCTCTCTCTCTCTCTCTCTGTG  
TGTGTGTGTCTCTCATGAATAAATAAATAAAATCTTTTTTTTTTTTTTAA  
AGAACCCTAACTACAATATATATCATTTGGTTCCATGGAGAAAAATGTGTTT  
CAGTTTCCAAAAGCTGACATAAAAACAAATTCAACACAGCTTCTTTGTA  
CATTGAAAATTGCTTATATTTTTCTTCTTTTTTAAAAATATTTTTGAAAT  
CTTTTTTGATGTTTTTATTTATTTGTTTTTAAGATTTTATCTGACAGAGA  
GAGCAAGAGAGCACAAGCAGGAGGAGCAGCAAAGGGAGAGGGAGAAACAC  
ATTCCCTGTGGAGCAGGGAACCCAATGCAGGGCTCCACCCAGTGTCTTG  
GGATCATGACCAGAGCAGAAGGCAGAAGCTTAAGTACTGAGTGAACACCCG  
GGTGCTCTTTTTCTTGTTTTTACAACCTGAAAGCAAGTTGGCTCTGAAGT  
CATTAATTCCTGAGGGTACAGAGCACCCACAGCTAGAAATTGTGACATGG  
ACTATTTTTGATCTCCAGTGAAGAAAGCCTTTTTCTAGATTCTGGTCCTA  
TAAAGAGCATTCCTTCAGGGGGCTTTCTTTATAAATTTATTTTTAAGGT  
CATCGATTGAAATCACAACTTACTGGTGTATATATATGAACTATGCCAC  
TCCAAAATCCCTAATCTTATTTCTTTCTGGAGATCAAGCTTGCTCAAAGG  
AAGACTGTGGTCTAACCAGCTGGATAGATCCATTGCGGCAAAAACCTCAC  
CAAAATATTGTCAAATGCGTTTCCGCAGTAACTCTCAGGTAATAAGCTGA  
ATGTCTAGCTGTCCGCTCCACACTTCACTATCTGATTCTGAATAACAGT  
TGGGGCAGGTCAAGAAGAAGAGTTAAGATACACGACAGCAAAGAAAGAG  
AAGGAAGAGCATAAAAGCTCTGTTGAGTCTCAGGAACATAAACTCTCAG  
TTGTGTGCAGCAAAATTCTCATGACCCCAACGTTGAACTTTGTAAATAGG  
CTTGGCATCAAACCTCTGCCTGGAGAAAATAAAGAGGAAAAGAAAGGAGG  
GGAGGAAAAGAAGAGGAAGAAGAAAAAGAAGACCTTGCCCTGCTCGACA

CACACACATACAAATGCATCCACATATGACATGCATGCACCATTAATTTT  
GCAAGGATATATGCAACTGGCTTATTGTACACCAAATTATCAAATCTCAA  
GCTGCTGAGCACAGGATGAAACCAGTATTCTTTTCAATTTGAATCGTGACCC  
CTCTTATGTAGTGCTTCTCCCTAGGGCTTTTAAAGATTTTTTGGACTAGATT  
GAATTTGGAAGAATGATGGCAAGGTGGATGGACCATCCCCGGCCACATTT  
CTTGGAGGGGCTATTTCTAATATGTCAGTATTCTAAACTCCATAATAGGT  
GAGGAGAAAATAAAATGGATGATGAAAGTCCAAAATTTAAGTCTTGGTGG  
ATTTGACTGTCAGCGCAACTAACTTACTCAATTTAAGTCTGATTCATTTT  
GTAGTTCTATTTTTGTGTTTCTTTGCTTTAAAACTGAAAGTAGTGGGGC  
ACCTGGGTGGCTCAGTGGTTGAGCATCTACCTTCGGCTCAAGGCGTGATC  
CTGGGGTCTGGGATAGAATCCCATATCAGTCTCCCCACAGGGAGCCTGC  
TTCTCCCTCTATGTCTTTGCCTGTGTCTCTCATGAATAAAATAAATTAATT  
AATTAACAAAAACGAAAATAATATGTGTTTCTTTCAACTATTATGAAAAT  
CGAAAACCATGCATACCAAGGGACCGGGCGTTTGGAGAGCGGAGTTTCAGG  
GCCTGACTCACAGTCAGTACACAAAATAAACATTAGACAGATACAATTAT  
TATTATTATTACAGGGCTATTACTAATTTAAATCATAGACCTGGTAAGGA  
TGGATCCCCACATGTGTGAACCTAGAGCTTAGCTACTTCTATTTTTTTTT  
TTTTTTAGTACAAAAAAGTGGTTCTTTTCAGCACACAGCAGGAAACAACA  
TATTGCCCTCCTATGTTCTATAGTTAGGAATTTTAACCTATGATTTTGTT  
TGTTACTAAAATGGGAGTTTTTCATCAAATGGTTTGGAACTAATTTTCCAA  
TATAATTGCATACAGTTTACCCAATTCCATTTAAACTCATTCTACTACTG  
ATCATGCTGAGAGATACAGCAATAATGGGACCCAGGGCAACGGAATAGTT  
GAGAAATTTGTCATAGGGATGGGAGCTAGCATCTATTTGACTTGTTCTAT  
GAAAGTTCTTATGTATTTAACTGTGACTTAGACATTTCTATTTTCAGTGCT  
GCATGCTTCTTTCTGCTTTTCATCTATGTAATAGTTAAATTCGCGGAGG  
TAAATAATTTCTTGAGATTTCTCTACGATCAAATTAACCTGTCCTAGCC  
AGTAACATACTTGCTTGCAATACATTTTCTACAATTAGTAGTATAGAGGT  
CCCTTTTGATGAAGAACACTGATATCGGGAAATGTTAGGAATACCTTGCT  
AATACGGAGCTATACCTACAAAGCAGGACACTTTATATGATGCATGTAAT  
GTAATTAAGTAATGTACAATACAAGAGAGAAAAGGGCGTGATACAATTTT  
AGTTGTGATTGTCACTGGGATGGAAGATAATAGAATTTTTCCTTGGGACA  
GATGGAGTAGGAAGTGTGTGCTGAGAGGATAGCGTAAGTTTTGGAGGTTT  
TGGAGTTGAAAGTCCTAGCTGTGTCACTTAATAACTTTAGAAATTTTCAGC  
AATTAACCATTAACACTCTGTGCTCAGGTCCCCTCATCTCTGAAATGCAG  
GTAACCTTAATAATGTGCTGCTACAATATAAGACTGATGTGAAGATTG  
GGCAAAAATGGAGTTGACAGAAATATATATATATATTATTATCCCTTGAT  
ATTTATTGATATCAGCTTTGACATTTATGAAGATTATTTCAATAATTTT  
AAGATAATATATTCCAACCTTAACCAGCCTCTTCCTCATATAACCCAATG  
AACATCTATCATCTTTTAATATTTTCTATTGTACAAAATGGCTTCCTTCT  
TGTCTTACTCTTTTGATTTTCATCCTTTGCATTCTTCTGGTCACTGGTTTA  
CCTGTTATGTTGTTTGATCTTTGCCTCCTCCCTTGGGACTTACTTGAAGT  
TTTTGTTTTTCATTGACTTTTTAAAAAATTCATCTAGGTTTCCTTATTAAC  
ATTTTTTGAACAGTTAACTCATTTTAAGTTAGATTCTAAATTAGGCCACA  
AGATTCACTTGCCCATTTCCCTCAAATGCTGTAATTTGATCATCATAAA  
ATTACACCTGACTTCTCAACACCCCTTTGACCTTATGACAAAATACTGTT  
CTGCCCTTTGTTTGCCTGGGTCTTCTACTTCTTAATAAGTTTCTATATA  
GTAGACTTTTGTGTTACGGATTTTTTGAAGTACCAATAAGTCTGATAAAA  
ACATGCGAATATGCATATTTACCTTCTTGTGTTTTCTTTCATTTTTAACAA  
AAATGATTTTGTATTTTAGTAGAGAATGATCTATTTCTCTGGTGTAAATC  
CTTCGTAACTCCTCTGGTTTCATTCCATTCTAATTTTCCAGAGACATA  
TGTTCACTTCAGTTTGTGAATAATTTTCTACTAGTGCTTATCCCTTTCTT  
TATTTAATATTATCTCTTTTCTCCATCAGTTTTTCTTTTCCCTTAAAA  
ACAAATAAGCTTAGTATATGTTTGAATCAATGAATAAATACGCAAAT  
GGATATTAAGTTTTTCATGGCTTCTATTGGTCACCTGATTGCATAAATCCA  
TTAAAGAATATGACATGATTAAATAGTAGGTATCTCTGAGGAATTTTTAA  
TAGGGATTTCTATGAGGTATAAGAAAATTTTCTTATTATTCAATTTATTC  
ACTAACTACTTTGTCTAATCCTGAAACTCCAGGGTTAGTTTTGTTCTTTG  
ATGATTTCCCAAACACCTGAGGATTTATGAATTTGAAATCCAAGTTTGGC

ATTTGTAGTCTGAGAGTTTTAGGAAGGCTTCCCATTTCCGTAGACAACTT  
GAATGACGTAATCATTACAAAAGCAGAGTCCGATTGGAAATGTTTCTCTT  
TTTAAAGGAAATACGAGAAAAGCCTTTGGGAAGACTAAGCAAGCTCTTTT  
GAGAAGATATTTCTTTACAACTCTTATGCTAAATGTTATATGGTGTGTT  
TTCGTTTGTGTTGATGTTTATTTATTTATTTATTTTATAGAGCAGCTTTAG  
GTTTACAGCCAGATTGAGGGGAAGGTATGAAGATTTCCCCAGAAATCTGA  
CAGAAGCCCTTGTCCCCACCTGTGAATAGCATCTCCTGTTATCAACCTCC  
CCTGCTAGAGTAGTACATTTGTTACAGTTGATGAACCTATGGTGACCCAT  
CAACATCCCCCAGAGTCCATAGCTTACATTATAGTCCACTCTTGTTGTTG  
TACATTTTGTGGATTTGGACAAATGCATAGTGACATGCATCCATCACTAT  
GATGTCATACAGAATATTTTCACTGCCCTAAAAGTCCTTGCTCTATTT  
ATTCCCCCATCTGAAGCCTCGACAACCACTGATCTTTTTTACCATCTCCAT  
CGTTTTCTCCTTTTCCAAATGTCGTGTAGTTGGACTCATGCAGCATATTTG  
AGGGTGGTGTGTACTGAATCCCTTCAGTTTTCTGTCTTCTTTCTTTTTT  
TATTTTACTATTTTTGATCACTTTAGTTCTGCAACTTCATCATCACATCT  
TTTTCTTCTGATTAACCTTGTTTTGCTTCACCTGCTCCTGGGTTTTTAAA  
CAGTCTATACAGACTTTCACAAATAGAGACCCTCAGATATGTTGACAAAA  
TAAAAATCACTCCTAGTCTCACTGTCCATTGATGGTCTTTATAAACATGA  
CTGTGTATTTCTCTCTCTCTCTCTCTCTCTCTCTCTCTCTCTCTTTTGCT  
AAGTATAATTCATTTATGTGTATATAAACAAAACCTCATTAATAATATATA  
ATGGGAGGCTTTGCTAATTAAGCATCCCTACTCTGCAGTGTCAAAGTACC  
CTTTGCTTGTCTATCCAAGCACATTTCTCACACATTGTACGTTTCTTATG  
TGTTTATCTCTTCACCTGTACACAAAACCTCCACATTCAATTTGTTTTTGT  
TATTGAAACCTGATGAATAATACGTGTTCACTCTCAGTTAATTAAATCTA  
TGTTTCAAACCTTTCTATTTGTATCAAAGAAGTGATCAAGGAACACA  
TATTTCCCTAAGAATCTACTGTATAATTAGCCCTTTGCTAAGTGCTGGGTA  
TCATGCAAAAGAAATAATGGCCACGCTAAACACAAACATAGAGGAGGAGA  
ATGAAGATCTGGAATCCAAAGACAGAGTGATTTGCTGCATATGTTGTCTC  
TAGTGGCATGAATAAATTCCTTTATTCTGCATGTTGCAAATGAGGAAATT  
GAACTTAATGTCTGCCCCACAAAACCTATTTTGAGAATTTCCAAAATTAGT  
GCTTTCACAATATGAGGTGAGATGATAAGAAATAGTAATACCGTTGCCGT  
AATTTAGCATGGCAATACATTTACAATTCAGTGAATGCAGCATAAAGCAT  
CTTCAGTTCTTATTAATGATGTAAACTTCAACTCGTTCTTCTCTCAGCA  
AACTTGTAATAAAAAGCTGGCAATGAGATTCCATCCTGACTTAATACATG  
ATATATATTCATACTTTCCGGAAACCTTGATAATGCTTTTTACTGAATTG  
GATCTCTGACAAAAACAAGGACATTGCTTGGGAAAAAACAACAAAAA  
ACAAAAACAAAACAAAACAGCATTCTTGATGAGATTATTTTAAAAAGAAA  
TGGTTTGTCTACAAAGAGAGCACCGAGACATTAAAAAAGTAAATTAATAA  
AAAGTGCAATTATTTGATTTTAAAGTCTTAACACTTAGATTGATTACTGAA  
GCCCAAGGAACTACCATATACTTCCAGACATACTTTGAAAGACATACTTT  
CACAGTCTTTCATTTTGTACAGTATTAGCTTGATGTTGGCAAAATCTCC  
AGACTGACCATTTTGTGACCTGAGTACTTCTCTAGAGAAATTTGTACAAA  
TCCTGTGAGTTTTAATATTTATCTGCTTATTTAATATGTAACCTTAGCAT  
TTTCACAGTGAATCTTAATTGGTTTTTTTCTTAATATTTAATCCTCAAAA  
TGTAGAACATGTCTCAGTTAACTATTATGTAGCACTAAATGTGTCCTCAA  
TAAGACCTAAACAGAAATCACATTTTAAAAGGGATCACCAAAGTATATAT  
TCATATATATTATATATGCTTCATACATATTCCATTACATGGTGATTTTT  
TTACTTGTTTTATGCAACCTTCAGTGTTTCCCTCTTATGATAAAATTCAGC  
ATTCCCTGTAAATTCAGGAATTCCTCAGTGATAAAGTTCGGCTTTAATTAG  
AATTGAGATTTGTAAAGAAAGAGACTAAGCACAGGAAGTTATTAGAATAA  
CAACATGACAGCTGGAAAAATTTCAAATGGACTGATAGGACATATTAATG  
GATCCCAAATGTTTTTATTTTCTTCAATTTCTGTGTTTCCACATGAA  
AGCTAAAGAGAATGGTTTTAAGCTGAAGCATTACCTCTTTAGAGCAGATAA  
AATAAACAAACAAACTTAAAAATGACAAAACGTAAGAAAAACTATTTTT  
GAAATAGAATATTTTGATAAAATCTTTCTTTTCCCTGGCTGGTTCATATTG  
ATTGTTTATGGTGATTCCACTCATTGACTTTTTTCCCTCTTCATTTTGCCT  
GTGTAAATAGTATCCAAAAAGCATTTTTTTTTTTTTTGGATAGCTTATTGT  
GTAATTGTATATATTCAGTTAACCAGAATTGAATCAAAGCAGGGTCATTA

AAAAATTTATCTCCAGCCATCTTTTCAAACACAAGAGACTAGTCTCATGA  
TTATGTAATGCAATGTTAATAACCTTCAATTTTTCTACTTTGTCTGGTTAT  
ACACTGCTATGTGTTACTATTAACAACCATTACCAATATAATTATTAGTT  
AACATATTCTTGAAAAAAATTTTCTTGAGTATTTACCATATGTCAATTA  
ATAAGCTAAGGGAATTTATATAAATTATCTTATTCAATTCTTTAAACTG  
GTATGAGGCAGTTACTACCATCCCAATTTTCAGATTCACAGAGGATAAGTA  
ACTCATTTACGTTCTCACAACCTGTAAGAGATCAATCACATGCGGAATTAA  
ACTCATGTCTATCTGAACCTATGCCAGCTCATGTCCTAAAAACATACTTAG  
CAGATGGGGCAGGTAGATATGAGCCTCCTTTTGCAGACATGAAAACAATG  
CACTTACTACAAGTTCTCATCACTCAACTTGCTCATGAACAGTCATCAAA  
CTCTTAGGAAAGATTGATTTATTGATTGATTGATTAAACAACCTGGTAAGC  
TTTCTCACTTCACCATAACTGCTTTGTAATTTATATTTGCTCTTTAAAT  
ATCTGGGCACTTATGTTGCATAGTGGCAGCTGTCTTATGATAAATATTAG  
TTTAAATTTGGATACTAAATTTCCCATCCATGTTTGTCTGTGATTTGTCT  
CCTGATGCAAACAAGTATTCTAAAGAAACGCAATGTGGTCCAGCATTGGG  
CAATCGGTAGTTTCAGGGAACACCCCAAGAGAAGGTAAACACATTCCCTG  
GTGTTTTGCCTGGGGACATATGTTTCAGACTTCATGGCAGAGCAAAGTGGA  
GGCCAGGGAGAGGAGAAATGTCTTTGAGTTGATGAGATAAAGACAGGGAG  
TTTCAGGCTGCTGCAGCAATGTGAATTTGCAGAACAGATCCTGGAAATTA  
AGGAGTTGCATCGAGAGGCAGGTCCAGATCTACACGAGGATTTATCAAGG  
GAGCTCCACTGAGAGAATTTGTGCTGATGCAGGGCAAGTAACTGTGAGGT  
ACAGCAGAAATTGCTTCTGCAGAGATGAGAGAGAAACGGTGACACCAA  
GGTTTTTCAACAGTGGAATGGAATTTTGGCCCAGGAAAACTGGAGAAAT  
GTCTCTGCGAAGCTCAAGCATTCAGGTAAGAGCCTAGAAAAGTCACAGCT  
TAGTGATAAAGACTGTCTTTTGAATAAAGGCCATGCCCTAGGGCTCAAT  
TGAAAACCTGAAATCTCGGTGTTCTCAGAAATAATAAAACAATCAAGCCTC  
ACAGGAATAATAGGATCTGCCAGTAGCTTAACTGCCTGTCAGGAAAAAAA  
CAAACTGAAAACAAAAATAAAAAACAAAACCAAAACCAAAAAACACCCCA  
TTATTTTAAAGAAAGATGGCATAATACAGACGCTTTATAACATATCGCCAT  
AATGTGCAGACTATAATAAAAACTACTAGAATGTGGGGCACCTGGGTGG  
CACAGGCGGTGAAGCATCAGGTTCTTGTTTCAGCTCAGGTCATGATCTC  
AGTATCGTGATATCGAACCCTAAGTCGGGCTCCATGCTCAGCTTGGAGGC  
TGCTTGAGATTCTCTCTCCATCTCCCTCTGCCCCCTCCTGTTCTGCTTGC  
TGTCTCACTCTCTCTTTCAAATAAATAAATACAACTTAAAAAATATTGG  
ATATTCTTTCTGCTTTGTCAAGTATAAGTGGACCAAAGAGTTGAGGGCC  
CATTTCTGGATTCTCTATTCTGTTCCATTGATCCATGTGTCCTTCTTG  
CCAGTACCACACTGTCTTGATGACCACAGCTTTGTAGTACAACCTGAAAT  
CTGGCCTTGTGATGCCCCAGCTCTGGTTTTCTTTTTCAATATTCTTCTG  
GCTATTCCGGGGTCTTTTCTGATTCCACACAAATCTTAAGATTATTTATTT  
CAACTCTGTGAGGAAAGTCCATGGTATTTTGATAGGGATTGCATTGAACA  
TGTAATTTGCCCTGGGTGGCATAGACATTTTCACAATATTTATTCTTCCA  
TTACGTGAGCATGGAATGTTTCCCATATTTTACATCTTCCTCAATTTT  
TTTCAGAAGTGTTCTGTAGTTTTTAGGGTACAGATCCTTACCTCTTTGA  
TTAGGTTTATTCTACGTATCTTATGGTTTTGGGTGTAATTGTAAATGGA  
ATTGATTCCTTAATTTCTCTTCTTCAGTCTCATTGTTAGTGTATAGAAA  
TGCCACTGATTTCTTTGCATTGATTCTGTATCCTGCCACATTGCTGAATT  
GCTGTATGAGTTCTAGCAATCTTGGGGTGGAGTCTTTTGGGTTTTCTATA  
TACAGTATCATGTCTATGCGAAGATGGAGAGTTTGACTTCTTCTTTGCA  
TTTGAATGCCTTTTTATTTCTTTTGGGAAAAAATTAGGGAGGAAAACAAA  
CCATGAGAGACTCCTAACTCTGGGAAACAAATAAAGGGTTGTGGAAGGGG  
AGGTGAGTGGGGGTAGGGGGTAGTTAGGTGACAGGCACCTGAAGAGGGCAC  
TTGATGGGATGAGCAGCTGGGTGTTATACTGCATGTTGGCAAATTGAATTT  
AAAATAAAATAAAATAAAATAAAAAAGACAACCTCCAAAAAACAAAAAGAG  
GGAAAGTTTAAAAACATTTGAAAAAACCAAGGTTGAAAAAAATGAACAG  
AGACTCAGTGGCCTGTGCAAAAAATAGAACTGGTTTAAATATAGGTGATTG  
GAGACCAATATAGGAAGGGGAAAAAGGGAGGGCAGAAAAATTTTTTGGAG  
GGGAACCTGGGTGGCTCAGTGGTTGAGGTTCTGCCTTTAGCTCAGGGCAT  
GATCCTGGGGTCCTGGGATCAAGTCCCACATCAGGCTCCCTACAGGGAGC

CTGCTTCTCCCTCTGCCTATGTCTCTGCCTCTCTCTATGTGTCTCTCATG  
AATAAAAATATATTTTTTAAAAAATCTTAAGAAAAAGAAAATATTTTTTGA  
AGACATTACCTATTCTCAGGGGGAAAAATCAAGTTACATATCCAAGGAGT  
TCAAGGTAAACCAAGTAGAATAAATACCAAAAAACCATACTTGGTGTA  
TCACAATCATACTGCTCAAAGCTAAGAAAAGGAGAAATTTAAACTCTGCC  
AAAGGAAAAGAAAGATTACAGCTGGGGAAATTTGATTTTATTATATGAAA  
TCAACTGATTGCTCATTGATGTCAACAGATGCTAGAAAACAATCAAATTG  
TGTCTTTCAAGTGGTGAGGGAAGATGTTGACCTGGAATTGTGTATTCAGT  
GAAAAATATCCTTCAAAAAATGATGATGAAATTAAGAGAATCCCAGCCAAA  
CAATAGAGGAGAATTAATTGCTTTCAACTTTTTTACAGATGTGAAAAGGAT  
TTCTTCAGATTGAAGAAAAATGTCATTTGGTGGAACAGTCACAAGGGAA  
ATACACTCTCCTGAGAAACCCACAATGGGGTACAGCAAGGATCATCAGAC  
TATGGCCTGTGAGCCAAATCCGGCCTGCCAACGGTTTTCTGTAGTTTTATT  
GGAATGGAGCCACACCTATTCAATTTGCATACTGTCTATGGTGGCTTTTTGT  
GTTGCAATTGCAGAGCTGAATTGTGAGAGATGGTATCTGGCACTTTACAG  
GGGAAAAAATTGCCAAGTCTTATCATAGAGAGTAAGAAAGTGAAACCAT  
GATAAAATGTTTGTCCATGGACAAAATACAATATACTACAGCACAAATTA  
ATGCATTGAGGAAACCCAGGGCTTAAAAAATTAGGCTATTTGGAGATT  
TTCACTGGGGAATTGAGAGATTGAAAAAGTGAAAAATGTATGAACCTTAA  
CTAAAAGGCTTCTCCCCAGAGTCTATGCATCCGCTAGGACAGAAGAATAG  
CCAATGGTTCTTTGATGCTGCCCAGAGTTAGAGACAAGATGTGGTATAAA  
AAGTAAGATTCTGTTGGTTTTATCAGTTTTTAAGTTTACTTCAAGGCAA  
GGGTATTTTGAATTATGTTCCCCCTTTCTACACAACTAAGTAAATAAAT  
AAAGGACTTGCAGTTGGTTTTATCCTGTGTTCAACTTTTTTTTTTTTTTA  
AGACTTATTTCCGTAAGGCATTAGTTCTTGAAAAAGAATTCCTTCACAGA  
GAGGAGATTTGTGGCCAGATTGGTCTATCAGACTTGCACGAGCACAGGTG  
GGAGTTTAGGGAAATAAACAGCACCCATAAGGACCTGTTGATAAATTTGA  
GCTCAGGCTTTTCCATCCCTTATATTCTCTTTTCTCTCTCTTTTGCA  
CATCTGTGACACTGGAGTTTGGCCCAGAGGAAGAACACACAGTTGAGATA  
AAGAGATGTGTGCCAAGAGAGCCGAATATTCGGATCAGATGGGATGCAGA  
TGAACATCTGTGCCGAGAAAAAGAAAGCCAAGGGTGATATTCTTCAACATT  
GAAATAACTGTGCAGAGTTCTCCCCCTGTAAAAGCTCCCTCTTTTTTGCT  
CTGAATTTTTTCGCTTAAAGAAGTAGCATCTCTTTGTATCTGCACTTAAAG  
CTTGTCTGCCCAGTCCGAGGTGTGTGTTTGTCTCGCTTCGGTTT  
ACCAATCCAAAGGCATAGGCAAACCTCCTATTATATTGTATCCATGTTT  
AAAGTGGGCTTGACAGTCAGATTTTTGCACTGACAGGCGCACAAATAAAAA  
TCATGTACTGTTACTGGTTTTCTAGGCAGAATTATTTCAACAATTATC  
TTCAAATCTCCAATGTTCTGTGTGCTCCAAACCAATTGTCTTTATATTAA  
TAATTAAGTCGAAGTGACAGTGGATGACAGCTGCAATTGGTTTCATTTGT  
GAAGCAAGCACTGCTTTCACTATCACCATGGAATCATTCTGGCTGGGTGT  
CAGAAATTTTAAGCCATTGAATGTAACCAATTTGTAGTCAGACAAGGTG  
CACATTTTCAGGCAAACACACATTCTTGTGTGTGCGCGTGTGTAACATAA  
TACACTTGCTCGCCAAATCCCAGTAGCTTTAGTGAGATTTGTAAAGTAAA  
GGGCTACGAAATATTTGATAGACACAAAAGGTATGTCTTATGAAACAGCT  
TTGTTCCCATGTTGTCCCTTTAAGCCGAGGGCTGGCCAAAATTTTCAGTG  
AAAGGCTAGATAGAATTTTTGGCTTATAAACCATATGGTCTCTGGCCCAA  
CTAGTCAACTCTGCCCTTACAATGTGAAAGCAGCCAGAGACAATACATTC  
ATGAACAGGCATAGCTCCAATCTGATAAACTGTATTTACAAAAACAGGC  
AGCAAGGAGGATTTGGTCCATGGGCTGCTTTAAGCCATCATTCAACGTAT  
TTTATTTATAGCACGGTACGCACCATTTTTAAGTTCTTATCCCTTTCTGA  
CTATTAAAATTACAAAGTGTACCAGAGATGAGGAAAGAGTAAAAATAAA  
AATTTGGCAGTTATTTATGATCTCGAACAATCCAAAATGTATTTTATATA  
GATATAGCAGGTGATATTTACGTGGTGTGCGACAAATGACCTCCACGCAA  
TTTATCTCATTGGATTCCGGTAACAACCTTGTGAGTTACAAAGAACAGGT  
ATGATTCTTAAGCCCCATAAAGCTTAAAGAAGTTAAATGACTCACCAGG  
GTCAGAAATGCTACATGTAGAATCGGGATTTTAAACCTTCTGTTTGGGTA  
CCAAAACTTTTTATTTGGGGCAGCAAGCCACTTGGGGACTTGATTTTTGGT  
GGTAATTTTTGATTTGCGTAGAAGTGGTCCGAATGCAGCTCTTGATGCAC

AATTACTGTTGGAAGTGAAAAAGAAAGTAAATATTTTCTACATTATTCTGA  
TTAATGAAGTTAGCAAGAATGAATAATTTAAGGAAAAATAGAAACCAGCC  
TCAAAATACTGATTTTCCCCTTAATAACAGCATTTCTCTGCCTGTGTTATG  
AAGGTAATTGCCTCAGTGATCCCCTTGGCTTCCCTGTGGAGACAACACCT  
TAAACAGCCTTTTATGCAGGACTCCATCATTTCAAAAAGAGACTCTAAAA  
TGATTTGCTCCGAGCCAACTGCCGCTCGGAGGAGCTGCTATGTACACTTT  
TGGCTTCTGTACAATTTTACTGTTACAACCTTTTATTACATGAAAAGCTCA  
AAGAAGAGATAAACCCTGCTTTAGGATTTTTTGATATAGACATTGAGCCA  
TCAGCGCAGAACTGCACTCATGGATTATGTCCGTAGCTCTCTTGTCTGT  
CTAAGAACGAGTCACCTTATAATATTACCTTCTAACTTTCATCTATATTG  
ATGGTTTTTCTCCAATAAGAGCAAAATGTTTTGGAGAACTGTCTGAATA  
TCTTTACCACATTGGCCTGAGATCACAGGGTTTACAATTTCCATTCTTAA  
TTTTTTTTTTTCTTAAATGGTGCTTTTAGAGAAAACCAAGTTAAACTTTTT  
CACAGTTGTACATATATATGACATCTGAGAATGTCAGCCATTTATGAAGG  
CTTTGCTGATGCTAAAACAACATAAATATTAAGATTAAAGCTCCTCATTA  
ATATAAAGTTAGGTGAAAATGACTTGTCTGCGGGAAGTATGAGCAGTTGG  
AGGCACAGCTCTTCACACAACAAAGATGGTATCGCCAAAGTGTAAGTGA  
AAAGACAATCTGACAGATGCAAGCATCTGTTTTGCTGTACAAAGTAATGT  
CAAGTGGGAGAGGGAGAGCTGAGGTAAGGGTAGAAATCTGACAGTGAAGT  
TATTCCTTCAAATTTTATAAAGAAAAAAGAAAGAAAAAAGAAAAA  
AACAAATTTTATAAAGAGGCAGAGTCACTCTCTTCTTGGCTATAAAGAGT  
GATGCCATTCAAGGAAGCGATGAAGGAAGCGATGTTCACTTCTCGATCTA  
TTTAAGAATCGATGGTGGTGGTCCCTTCACTTGAGCCCCTGACAATCTCA  
GCTATTGAGATTACGAAAGGGGCGGAGGTGCAAGTAAGTGGCTTCCTGG  
GTTTTAAAGGTTATACGTTATTTTTGACATCATTTTCTGTCTATCAAAA  
GTTAGAAATAGTCCCTGCAAAACAGTGCCATTTGAAGTTTAACTCCATTT  
ATTGAACCTCTATCAGCAAGATGCAAAGGTAAATTACAATAGTATCATCA  
TCTACAGAGAAAGAGAGAGAAAGAGAGAGAAGACCTTTGAGGCTCTCTCA  
ATTATTTTCAAAAAGTAGAGTCTGTAAGTACTAGTCTGAGAATTAGATT  
GGTCGGTGTCTGGCAGGCACCATAAAATCTTCACATATAAAAATCGTGGGT  
TCCAATAGCGATGGGTATGGTGCGGGGTAGGGGTGGGGGTGTATCCTCG  
GACCATATAGAGCACCACAGCGTGAGTTGAGAAAGTCCTTTAACAAAAGG  
CTGTCAGATATGATTTACGGAGCTGGCCTCCATTGGGCAAGCCTCACTGA  
GCACTCTGAATTCGAGCTTTCTCCACTGGCAGACTTTTCCATAACCCAAC  
AAAGACCTAGAGTTATAGGCAGTTCATAAAAGTGATGTCTTTTGTTTAGA  
TCTAACAGGGTCTCTCAACAGGGGAGGCAGAAGCAATGAAGTGCAAAATA  
TAATATGAAATCAATTTCCCTTCTCACACGACCCTGAGAATAAAAAAAA  
GATTCTTGTTTTCTGGGGCTGCTAAAAATCCAAATGTCTTCTGGGTGGT  
TGGAACAGAAGACCCAGAGAGTTTAAAGAATATTTTTAGCTTAATTAGTTT  
AGGCACTTCATTTTGTAGACAGATTGAGTGCATGTTTCATCAGTTAGTTTC  
GGGATCACAGAAGTCTGAGTGAGATCGTTTTTCCAGATATAGGGTGAAGT  
AGTTTGAGAGAGAGGTTATGCTTAATGAGATCGACTTTCAGGGAAAAAAA  
AATGTATCAGTGGCTAAAGAAAGGGAATGCCAACTATGTTCCAGCACCA  
ACTTTAACCCTTAGAATGATTTTTGAACATGGTAACGTAACCTGCTTAGA  
TGACTCTGTGCGCCAGCAGAGATGGGTGGCAAACACACTGAACTGCATTT  
AATTGCTCATACACCATGCTATGCCTGAGGACGTGGTTATATTTCCATGT  
AACTATAACCACGGTAATGTTTGAAAACATGGATGGCATATAAAACATTT  
TATTCATTTTCAATTAATAGAATATATCATAGAAATAAAGAAGACTTCTTGT  
TCAGAGACTGTGCGGTATAAAAGTTATGTCTCTTTTTTAGTATATGATAG  
GAAACATTATACTTAAACTGTGCACTCTAGATCTTTCCATAATGTGACTC  
AAGCCCTGCTATTACAAATATATATATTCCTTTACATTTCTTCCCAAACA  
GGTTCCTTACAAGTTGTAAATTAGTCTGTACTAGTCCATCCGAGCTTATT  
TGTGACATTAGTTTTTTTTTCAAGTGATAGTTGATTTCAGCCATATAGGTAAT  
ATCATCCACTTTTTTACGTATCCTGTAGAAGGATAAATCTTTTTTTTTTTTT  
TTTTTTTTTTTTTAAATGAGAGGAAGTGGTGGGAGGGGCAGAAAGAGGAAGAG  
AATCTTAAGCAGGTTCCACGACCAGCACAGAGCCTGACGCAGAGCTTGGT  
CTCACAACCTCTGAGATCACGACCTGAGCCAAAATCAAGAATCGGATGCTT  
AATCCACTGAACCACCCAGGTGCCCTAGAAAGATAATTTTTTAACATTAT

GAAACAGAGTACCTGAATTTTCAGAGTATCAATCTGAGTTCTCTAAGAAAC  
AGACATAAAAAATGGAATTAGATATAAGCACATTAATTGAAGAAACATCTT  
TGAAGGATTAAAAAGGGGAAGAGGCTTGAAGACAGCAGATAGAGGTCTGA  
CATCTTTGAAAGAAGAGAGGGGAAGGAAGGAAATGAAGGAGGATGGGCCTC  
ACCCTGTAGGACTGCTCTGACAAAATCTTAGCCAGGCTGATGGGGAGCAA  
GAAAGATCATTTGTGAAGAAGAATCCTTCATTTCAGAAGGAGACGCTGAGCT  
CTAATATCCCAGCTGTGCTCAGGCATTATCTGGGATAAGGCTGGAAGGAG  
CGTAGCCTGCCTTCCCAAAAGGTGGCAGCTGGAGGCTATCCACCATCCAT  
ATTTGTCTCAATGGATTCTCTCCTGAGGCACAATCTGAGCCCTATATCCC  
CTGGTTGCCACAATTTAGGAATCTCATTGTGAAATATCGAAATGGTAAA  
CATGAAAAGAAATTACCTGTGTAATCATATCACAAGAGTGATTCCAACAT  
ATTGGATGCTAACGTAGATAAGACAGGTACTAACTATACAAGGCTAACTC  
AAGAAAAAAAATCTAAAATTGAAGTAGTTTTATTTCAGTTGTTTGTTTTT  
CTTAACATAGGAAAATAATGTTAAATTCAGCATTAGCAGCAATAATCCTT  
GGATCATCTCCAAGCATTTTCAGAATTCAGTGGGGCCATATTTTTCATAAGT  
AGTGGGATAGCTTATGTGTGTCATTTAAAAAAAATTAAATTCATGAATTT  
AAGAGTTGATACATATATGATGTGCCAATGGTGCCCTGCTGATTGTGCCC  
CTTCAAGAGGAACCATCTAGAACAAAAATAAATAGAAAATATGTCCTCACC  
ACCGCTTTCTTCTCTCTCACATGCTCATCTTCTTTTCAGTGGTTCAAATT  
CCCTGGAGTTGCTTTTTTTAATTTTGTGCTGCTTCCCTTCCACTAAGGATTC  
ACTAGAGCAACATGTTATCAATGAGACTTTCCCTGTCAGATTCCATAGTC  
TCATCTTATGTTTCATTTCATTAAACAGCCATTTTCTAAGATCCAGATGGAT  
GGGTTGAACACATAGTGTGAGTTGAGTAGACCTAATCCAAAAGAGCTGTC  
TAGCTTCTGTCCAACGATGGGGGTTTATTACAGGAGCACAGGGAGTGGCA  
GGGTAACATGTACCCTGGGTGCCAGCACTTCTAAGTCTGGGATGTATCGT  
GTGTTGCATGGGGAAGCAGACCCATAGCTCAGGTTTCTTTAGGACATCAT  
CCTCCACCAGATGATATTCCCTCCCTGAGTATACCTCCCCCTTCTCACCGC  
TTTGTAAGAGAGGATTTCATTCTGTTCCATTTGTCCAAAAGAAATGCAGAGT  
TTTGGGTGGGTACAGCAGGGCTGGTTGTTCCATCTCACGCCTAACTTA  
TTTATCGTGGCTGCAGCTTTGGCATCATTTCCCTTGACCAATCAATAGCTG  
CTAGGCTAGCAGGGTTTATTTCTCATGGTACTCCTGGGGTAAGTCAGAGC  
TGTTTTGTACATAAAGAACCTCTTGGGGCTGCTTTCTGCAGAAGAGGGCA  
ATTAGAATTTTATGGACTCTCCAGCACAAAGTGTTAATGTTTGATAAAACC  
TAACTATGTTACTCCTTGCACTTAACTGCATTTAACCATTGTTTCAATGC  
CTATAACTCTAGGAGCTGGGCTTGCATTCCAATCACAGAGCTCGGATTGG  
CTTCCAACCATGCTGTACGTTCTTCTGCAAAAGTCCAGACTTGCTCATCA  
ACCATTGGCTACACGCCCTACGCTAATCATGGTGCTTTTTGTAAACCAAAG  
TGAACTTTATCTTCTGATCTTGTTCATGGACTTTAACTTCTGTTTCTAGTT  
CATGATCATGATGTTTTTTAATGACAACTTGCGTCTCAATTCAGGTTGCT  
GTGTGATTACTTAGGACATCAAATCTTTGCAGCTCATATGTGGCTCAGC  
ACCATGAAAAAGTAAGGGTGTGAGGCTGTGTCTGCCAATAACAGGAGCCC  
AATAAAGTTAATTGTTTCTCCGTTAGGCACCTTGCTAGTACCCTGAACAC  
ATGGAACCGATTATCTGGCACTGCAATGTTGTAAATAAAATGTGCAAAA  
AAGAAAATACAATTATTGCTAAAGCAAAAACATACCATGAGGGGTTATTA  
AAAAAAGCAAGATGTTTTACATTTTAAGGATGTTTTGCTGCTACATGTGT  
GTGTTTGGTGAAAAACGATTAGCTCCAAGACACTGCAGTGCCAGTGTTAA  
ACTTTTCCTTCTGCCCCGTTGTCTTTTCGGTCGCCTGAAATAAATGGAAGC  
AGACTTTCTCATTTCTGAAGGAAAAATAAGTTCTTTTAAATTAAAGGCATAT  
TTTGGCAACGTTGGAACCTAGACTACCTACTTAAACATTTATACTATAA  
CTAGGATGATTCTTTAATAAGACCGTATTTACTTCTATCAGACCTCTGGG  
CAGTCTAACTCTCTATGCACTCCCTTTTATTACAAATGAATATCATCA  
CCTACAGTAACGCATTCTGGTATAGAATATAAATTACTTTGCTACATGGG  
GGGGAACCCCTTATAATCCTCTTTTAGCTATGCTTAAAAGAACCATGGG  
AATTTAATAAATACAATGTGTTTATAAGATAAAGAGTCATAATCAGGTTT  
TTTCACCTTCAAAGATTTTCCATTTCTCACCCAAATTTAACATAGTATTG  
TATTGCTAAATGTAATGTAATGCAATTGCATTAACATCAACCACTTTTCA  
TTTTAGATTGCTTTTCCCATAGAGCAAATAACGTGATGGTAAGATATTTG  
GCTGATGTGCACTAAGATTATATAAGAATGTTTTATTAGATTTGAATTTT

GTGTGCATGCCCTATAAGTAATCAAAGTATCTACATTTTCAGAAAAACATT  
GTATTAACCCATTTCGACATTGCAGACCGATTTCACGTTTTAGCCTAAAACA  
CCTGAGGATCTGAAAAATGAAAACCATTTTTGGATTTTAATATCTCTGACT  
TCAATTAAGCAAACAAAAAATAGTATTTTTCTTTTTTGTAAAGTGCCAAA  
AGTCAAGTGAAGTATATTTCGAATACATCTGAGTAAACAGATCTGGATGC  
TTGCTATTGATTGTCATGTAAAACCAAGCATTGTGTTGACCTTAAGTTTT  
AACGAGGGGCTCTTTGGTAAACAAAGAACACACACCCCATGTTAGTACAAT  
ACTTGATTTTTGCTCCATTTTTCCACATCTTGTTATGAATCATCAGAAGGAC  
GAAAAATTGAGATGTGACTGGAATCTCAAAAACGAACATTTGCCATTCAAA  
TTTTTTATTTTAATTTTCATTACAAGTGGGGCCTAGTAGGACCCACCAAAA  
TCTTATACTTTCTAAATGTCACACTTTTCATCCAATTGTCAGTTTTGTAC  
TCTGCTTACTCTATAGCTTTCTTACATTTTAAGACAATGACCAGGGCAGC  
CCGGGTGGCTCATCTGTTTAGCGCCGCCTTTGGCCTAGGGTGTGATACTG  
AGGACCCAGGATCAAGTCCCATGTCGGGCTCCCTGCATGGAGCCTGCTTC  
CCCCCTCTGCCTGTGTCTGTGCCCTCTCTCTCTCTCTGTGTGTGTCTCTC  
ATGGATAAATAAATAAAATCTTTAAAAAAAATTAAAAAACTAAAGAATGA  
CCAGGCAGGCACGAACCTTAAAAATGAACAGAAACTGATCACTTTTTTCCAA  
TGGACAGAATCAGGAGATCAAAATCTTAGATCATCACAGTCTGATCACAAT  
TTTAATAAGAACTTTTTGTGAAATCGGAGTTTAATTCATTCTTTTGTACC  
ATTCTTTCTAGCTTAGGGAATATTTGATTAGAAAAGGTCAGCATTGGTTA  
GGCCAGAAGGAAGCAAATAGTACAACCTCGAGAAACTGGATTGGCCTGGAG  
TGAATTTACATGGAAGCACTGTCACCCCTTCTCAACCAAAAGCTCAGAT  
AGAGCATTAATGAGAAAAATCAAGTGCATAGCCTAGCTATGACTTCAAATT  
GTTAAATATAATATGCTTACAGCTGCATAGTATGATTTAAATGATATAAA  
ATATAACACTGTAGCATTTCCAAGAGGAAGTAATTTAGGGTAATGGCTTT  
AACTCCCTTTTACTAAAAATGTTGCTAGCTGCCAACAAATTTAAAAGGGAC  
TTTGTTACCATCAAGACAAGCCCCCTCAATTCCAATGAGATGATGACTCAC  
TGTTGATAACCCTGATTTCTTTGAGATTTTGATGTGTAGAGAAAAAAGA  
TGATTTGGCTACTATTAATAAGCATCTGTGCAAAATAGAAACAGTCATTG  
TGAAGCATGTAGCCAGAGGCTATTTGAAAGGGAATCTGGAAGATAATTAT  
AGGATTCATAAATGACATAACTAGGTTTTGGCAACTTTTTAGAAAAATT  
TGCAGACAGATATTGTATGTTTAGTAGGTTAACTAAATCATCCAAATTAC  
TCTTTTTATTTCGTGTTACAAGTAATGTAATATAACTACTCTATATTTTAT  
AGATTTGGCATAATCAACATGATTTAATATACTTACATTCACATGTATAC  
TCAACTTTTTCTATTCATTTTCGAGTGGGTTTCAAGGAAGCTAAATTTTGAA  
GTTTAATATATAAACACGTGAGTACTGCGCATTAGAGAAAAAAACATTTT  
ATTTTAAAAAGTAATCTGTTAGAGTCATTCCACATTAGAATTTTTTTTAG  
CAAGCAAGCAACCATTAAATATTTAAAGATATTTATTTTTCTATCTATGC  
TAGCTCCATGATTTTCAAATTTCTCATAAGTAAGCAGATTTTCCATGTAA  
TCTTACTTGAAATCCTAATATGTGAAAACAGGTAAATAATTATCTTATTA  
CTATATTTATTTTATAAAATTTAATGTTTATTAAATGATTAACCTCCAATG  
ATGGCTGAGGCATTGTACAGAAACCACAAGATCACCTTGTTCAACACGGA  
CATCCTTGAAATAATAGCTTCGAAGTGTTAATGGCAATTTTACTTACATT  
TCAATTACTATTTGCTCCTGTATTTTTATTTGGTTGCACAATACTCAGAA  
AACCTTGATTTGTTAAACCAATAATACATGGTGACCGATTTTAAAGCTCT  
ACCCCTCAAGTTTCAGGAAAAGTATCATAATAGCGATATCTCATTGTGAAA  
TTTTCCACATGATCTGTTCAATTTACAGCACAAAGGAACATGTTCCCTAAA  
ATGCAAACACTTTGCGATATAAATATTGTGTTTGTAACGGTGTCAAAGAAA  
GCATATAAATCATGCATATCAAAAATGCGGAATGCCATGTGTGCAGAATC  
ACTACAACAACCTTGTTAGTAACCGGAAGGTTCTCTGGAACCCAGCATTTT  
CAAAACCACAATGGTCATTGGAGAAAAATATTAATAGTTACCATAATATG  
AATAATAATTTTGTCTTGGCATTTAGAATTGATTTAATAAAAGCACACG  
TGGGAAAAATTTAAGAATTGAAGGTTATCGGGGCAGCCCGGTTGCTCAGT  
GGTTTAGCACCTGCCTTCAGCCCAGGGTGTGATCCTTGAGACCCGGGATC  
GAGCCCCACGTCAGGCTCCCTGCATGGAGCCTGCTTCTCCCTCTGCCTGT  
GTCTCTGCCTCTCTCTCTGTCTCTCTCTGTGTCTCTCATGAATAAATA  
AATAAAATCTTTAAAAAGTGAAAGTTATCGGAGGTTGTGTGAGTAGTAGA  
GAACCCCTGATAATAGTGTCAATTACAAACGGAAATGTATTTCTTACATAA

ACAAAATCCAGAGATAGGTCAGTTCATGTTCAAATCCAACTGATTATCCT  
ACTCACTTTTTACCCAGCAAGATGGGACAGGTGTTAGGAGAGATATATGG  
CTCTTACCCTTTTCAGGGCCCTTTTTGGCATTGTCATACTGCTGCTATTTA  
CACCCCATTAATCAGAAATAAATTACATGACCACGTATGATTGCAGGGAA  
TCTGGAATGGCGATCTTTATCTGGATGACCTGTAGTTTCCATTCCCAAGA  
AGGAGGAGGGAAGGAAGCAACCACGTCCCAAATGCTAAGAGCAAGTTCTC  
TTTCTTTGCCTTCCACCTGTCACCTCTAAGTCACGGCACGTTTAATTTACG  
CTTGGAATTCTGTGTATCTTAGAAAACACACCAACTTCATCATTTGGTTC  
TTCAAACCAGAATCACTATGGGTTTTCTATAGAAGTGTAGCCCTCCCTG  
CTGCCCCACAGCTTCCACTTGAGACCCAGAATGGTACATGTCCTCAGTC  
TGGAACCAATGACTAGAAAACCTTCAATCCCATTTCTTCTTTCAAGCGT  
CAATCCCCAACTAATTTCTGCCACGTTGCAGTTATTCTCCAGCATCTTTG  
GGTAATTGTTTTCTGTATTTTTGTCCAGAGCTTTTAGTTGTTATCTCTAGGA  
CACTTTGTCCAATAAAAAGCTTATCGATCAAAACTGGAAGTAGAAAACAT  
AGAAGTTTTTTTTCTTGATGGAAGTATGGCTGCTTCTTTTGTGCTCAG  
ATTCAGCCTAAATGTCATCTCTTTAAGGTTTTTCTCTGACTGTAATTTAA  
AGTAGCTTTTAACTCTTTGTATAAAAAAGCAGCCTATTTGAGGGTGTG  
TGGGTGGCTCAGTTGGTTAGGCATCCAAATCTTGATTTTCAGCTCAGGTCA  
TGTTCTCAGGGCATGAGATCGAGCCCCGCATTGGGCTCTACACTGAGTGC  
GTGTAGCACACTCTTTCTCTCTAAAACAAAACAAAACAAAACAATTCTAT  
TTTAAGACCATGCATAGCACTATCCACAGCCTATGTTTTCTTACTCTTT  
CTTCAAATCTCTGAAGTTAAGTGAAGTGAAGTCAATAAGATCTTCTGTGTAT  
ATAACACACTCTGTTATCTTCTACACACACACACACACAAACACACACA  
CACATACATATGTACACACATCTACAATGATCCTATTTTCCAATTTGCCT  
GGGCTAGTCTCAGATTATGCCCCTTGTCATGGCATAATGATTAATAATAT  
CTTCCAGTCTTCTCAAAATTGTCTAGATTGGACGGGTAATTATATCTTAA  
TGTTTAAACACCTCTTATGTTGCTCTATTTTCTTCCCATCACTGATCA  
TCACCTGCTACAGTAGAGTTTGTGTCCATACAAATACAGAAATATATTTA  
CTACATTATATATAATATATGCCTATATATTAAGATACATGTCTATCTCC  
TCATACTAGAATGTGAAGTATGAAGGCAGGAGCTTTTCTGTTTAGCTCA  
CTGTTAAATATTAGTGGCTATGGCAGTCCTTGCCACAGAGAACTTTTGTC  
AAAGGAGCAAATGAATAAATCAATTTCTCTCTATAACTTACATGATAC  
TGAGACCTGATATTTATATTTCTCCCCATTTATCTCCCATTTCTGGCATA  
CAATAGGACTCCAATATATTAATAAATTAATCTTAAATTTAAATTTAAAT  
TTAAATTTACTGTTTCTGCTTTGAGGTTAATCATATGTGAATGATGAGCT  
ATGATATCGGCATAGGCAACTTGACTGAGTTTCTTCTACTGATGCATAGA  
TCCTGTTTATCTCAAAGATCATGATTCTTATGAATTCACAGTCAGATTTT  
CATTTATATCATATGAACAGAGAGAACTAAGGCATTAGTCCCCCAGATT  
AAGGATCACTTTGCTCAGTTGTGAGTGGTGGGACAAGCCCTCTCAAAGAG  
GCCTGTTTTCTAATCCTTGAAAACCATAAATATATCACCTTGCAAGGCAA  
AATGGACTTTGAAGTTATGATTATGTTAAAAGTCTTGAGAGAGGGAGATT  
TTCTTAGATGATCTGGGTACAAACCAATATAATCACAAGAGTTCTTTTAA  
GTCTGAAAAGTTAGCATCAGAGAGAAATTCAAAGATGTTACCCTCCTGGC  
TTTGAAGAAGGAGGAAGGGCCACGAGCCAAAAAATGCAGTCAGCCTCCAT  
AACTGGAAAAGGCAAGGGGAGCAATCTCCTCTAGAGCCTCCAGAGGGAGC  
AGAGCCTGCTGACACCTTGATTTTAGCTCAAGAAAACCCATTTAAGACCT  
CTGATCTTTCAGAACTGTGAGGTAGTATTGAGAAACCTACTATTCTCTTCC  
TTCCGCTCTATCCTATTATGAAAGCGGTACAACCACAGCCAGATTCTAAC  
TGTGGCAGCCTCTTCGTATGCTGGGTGTCAAAGTGAAAATCATGCTTCCC  
TGGGACTCAAGATGTAAGATTGGCCCTAAGAAGCCCCCTCCCTGATCATAT  
GAGCATGTGGAACCCAAATTGAGGTACTGCCACCACCCACATCATGGAA  
CAGAAGGGTGGGAAGCCAGAGCCACCTGCCAAGCCACAGCCAGTACCCAC  
AGCATAACAGGGTCTCCTCGGCAGCTGGATCTAGAGTTTGGATTTCACTC  
TGTAAGACCTTCAAAAAATCTCTGAAAAGAAGTGTAAAGATAGTAAATA  
TATATTGTTTTAAGCCACTAGATATATGGTAATTCACTACAATTGCAACA  
GGAAGCTAATGCAGACTGCATGAAGCTTCTTTGGTGTCAATCCCTGCCAG  
ATGGAGAATTTTCCCTACTGATCTATTGGAAGGTAGAGAACTAGATATGT  
CTCTGTTCTGAATTTCTTCCAGGCTCAATGCCATCTCCAAAAATTGCTCT

GTATAACCTAGAGAGCAGCTGCTAGGGCTTCTGCTGGGAAAAAAGGCAGC  
AGGTACCTGCTTCATTTTCTGGAAGAGAGGAAGGGATTCTGCCATGCAG  
CTGTCTCCAGTGAGCTCCAATCCCTAGGGCTGCACAGCCTAGCCATTGT  
CTCTATGTTGACCGGATCTTACCTTGCAGTCAGCTGCTCCAACATTACTT  
CAGCTTTAGGTTTGCTTTTTCTATAATGTCAATTACATGACAAGTTTGTT  
CTTTAAGAAAGGTTTTGATTTGGGGGGTCACTTGAGTGGTTCAGTTGGTT  
AAGCATTCGACTCTTGATTTTCAAGCTCAGATCATGATCTCAGGGTTGAGAT  
CAAGCCCCACATCGGGCTCCTCATCAGGCATGGAGCCTGTTTAAGATTCT  
CTCTCTCTCTGCCACTCCCCCTGCCCTGCTTTTGCATGTTCTCTCTCACT  
CTCTCTAAATAGGAAGGAAGGAAGGAAGGAGAAAGAAAGAAAGAAAGAA  
GAAAGAAAGAAGAAAGAAAGAAAGAAAGAAAGAAAGAAAGAAAGAAAGAA  
GAAAGAAAGAAAGAAAGAAAGAAAGAAAGAAAGAAAGAAAGAAAGAAAGAA  
AGAAAGAAAGAAAGAAAGAAAGAAAGAAAGAAAGAAAGAAAGAAAGAAAGAA  
AAGAAAGAAAGATTTCTAGTATTTTAAATCACTGACAGCACCTTTTATCC  
TTTGTTCTTACTGCTACCGTGGCTTCATTATTTTTCAATAGCTTTATTGC  
TAGTTCAGTGGGATTTTGGTGAAGAAAATTAGGCAAATACATGTGTTTGGT  
CTGTCATCCTGACTTGGAAGTTCTGTTTTATAGTGCCCTTCTGCTACGT  
GTTTGGTTCCTTTTTGTTCTACTCATCCCCATGTGTCTCTACTTGCAAAG  
TACTGGGAGATTACATAGGGGATTTTTTTTTTGTGTTGTTGCAGTGATCAA  
AGATTCTTGGGGGCAGTGCCCTCATTATCTGTTAGGCCTGGTGTCTATGA  
TTGAAAACAGGTGCAGCCAAACCTTTACTTTGCCTACCACTTCTGTCTGC  
ATCAAATGAAAAGCAGGAGTAAGTTTTCTGTGGGATCTTGCCCTCCTTCT  
CAACACTCTTGTGCCGGAGAACTTTCCAAAATATTGGCAAGGATCTGGAT  
TTGTGGCTGGCCAATGGTCCCACATCCTGTCATGACCCCCACACATTTTG  
CAGCTTATCTCAAAGGATCTCATAGGAGATCGTTGTGTGGCTCTCCAGGA  
GTCATACCTTCCATGCAATTTCAATTTAATCAGCCACCTTGCAATTCAGTG  
TATTATGGGTCAATTGATCCATCCTTTAATATTTTTACATGATCGAGTCA  
TTCTTTGAAATTTCTATAGATGGATGGAAGCATTCCCTTATTTCTAAATC  
GGATTCCGTACTCTCCTCTCAATACATTCCCTTTGTGCGTGAGTTAAAGAT  
GGAGATTAAACATTTGTGCCCAAATCACCATGTCAAGAGCAGTTCTGGT  
ATGTTAACGTAACCAATATGCTTATGACATCTATTCTATGTTTTTATGAG  
AAGTTAACTTAGACATCAGTTTATCCATTATGGCTTCATTTTATAATTTA  
ATCCTAAATTGCAGGTGGCTCAGTGCATGCTTGCGTGATGCTTTTGTGAA  
TTCTGTGGTATTTTAACAATAGAAGAAAGCCTAACCTAGTAGACAAAATA  
TGGTTTCTAACACTTAAGGCCAACATGAATGACATTTGTACTTTGCTGT  
CTACACCAGAGAGCCCCAGCATAGAAGTATGCCAAAAATGACAAAGCATA  
ACCCTGAAGGAGATAGACGTCCAGAAATATTACAGACACTTGGAAGAA  
GATAGACAAGTGGTTTCATGATTCTGTCAACAGAGAGGGAAGGCCCAAGT  
TTCTGAGCTGAACTATGATAGCAAAGAGAAAGGTAAATCCCAGGGGAAGA  
GAACTGGCTCAGAAAGGAAGTTAGGTACCAAACCTTTGGAGGCGGATAG  
GAGACCGGAGGAAGAGCTAGATAATTATAGCATTTTATCTGTCACACTAT  
CTTTTATTCATCCTGCTGAACTAAAAGTAAAATTGCAAACTACCGGCCT  
TATGGAAAGCACCTTTGCAAATTTTATGGCTTTGCAGTTAAAGTATTAGA  
ATTTACTAACTGCCTGGGCTCAGATACGTGTACTCAAAATATGTTTTGAC  
TTCCTTAAGCTTGGGCCAGTGATGTTCCATCAACCTGGGTGACATTTAT  
TATAAAAACCTCAAAAGTTCTGTTATCATATCAATAAAAATTTTCAAAGCTT  
AGTTAGGCATTATAAAAAAAAAAATCACTTCTCATGACACAGATAGAGATTC  
CCCAATGGACCAACAACCACTGTTCCCAATTGTTTTACTCTCTTCAATA  
AAGGATTCCCAGCAAATGTTTCGGAAGAAATCCTACGCCTTCCAGGGATAG  
GCAGCTGGGAAAAAGGAAGGTTAATACACAGAAAGCTGTGGACTGTC  
CCAGTCCATTCTTCAGTTCCTTGATTGAAGGCATTAAGTTTTATTTTAT  
TAACTTCTTTCTTGCCCTTCAAAAGTCGAGGGTGCTCACTCCAGGGCTCG  
TGCAGAACTGCCCCAGGGAACCTCAGAGCAGAGGTTTGAAACCACAGCTG  
GCGGTGATTAGGAGGATTGGGGGAGATCAGTGCTTGATTAACTTTCAGCT  
GCTCTTGGTTTGCCTCAGTTCCTGCAGGAGAATTAATCCGTAGGTTTCGAG  
TAAATTTTGGATCTTAATGGATACCAGATACATTGAGCCCACCCAGACCA  
CCAAGATTTAGCAATCCCTTTTCTCACATTTAAATTGTACAAATGAATTC  
ATTCTCCTTACCCAGTGGCCAAAATAACTCCACCTCACTGTTTTTCTCC

CACGGCACTCTCTTCATTGTGCCTTCTGTTCTAGGAGAGCGTATGTAGGT  
TCTTTAAGGTAAGATCCGGTCGTAGCTTTTGTTCATTTCTGGAGCATGAGT  
TTAACCTCTTTCACCCAAAGAGTCCGTTGGATGAATAAGAACACATTCTG  
CTTCCTTCCCTCTTGACTTGTGTTCAATGCACAGAAAATTATTTTCAGCTCT  
ACCATCAAGAGTCTTCACTGTCCACCTCTGTGCCACAGGGATTAACCCTC  
CTCCTCAATTGAATTTTTGCCATCCTGGTTAAAGATTCTTGAATTGGAGA  
TGGAGAATAATTATCACAAATCATCATTATCTTGATAACATGGAAAGGTA  
AAAGATCATTAGACATTTTTACAAGAACCCATGTTTGGGGATTCTTACAG  
CCTTCCCTTTATTGATACATTTTATTAAAAGGGAGATTCTTCATCTAACC  
CCTTCCTTGCTAACTGAATATTCTTGTGAAGTGAAGAACTCCACGAAAG  
AAAAGTTGGCACACGAGTAATGTGCACATATTTGTTGAATTTCAAGAGAC  
TTCTATTTTTCTGATAGATTATTGTGATAGCATTGACCTATGAGACCCAC  
AGTGTTAAGATCAGAGACACGTAAATAAAAAATAAAGTATTAATCAACATA  
CATAAATCAAACAGAAATTTTCCCTAACAAGCATGTAACCTCATTTCCCTTT  
GTAGAATCTAATTGCAGGAAGTGGCAGGAAAGAAAGTGAGAGGGCGCAAA  
GCTTATTGTAATGCTCGCGTATGCCTCTGAGAATTTTAATTTAACTAAAC  
GAGAGAGGTAAATTTTCCATTTGTGACTTCTTGAATTACTATGATCAACT  
TGCTTTCAGATTCACATATTCATTTTATTCTCTTACGACAATATTTATTA  
GCCCTATACTAACACAGATTTTTCAGAGCTAAGTGTTTCTTAGGAAATGTT  
AACAGTTATATTCTGTAAGCATCATCCCTCCTGCCTGAGCTCCTCCACCA  
ATATTGGACAAATTCAGTGCATATTTGTATATCTCTATCATTACTTTTA  
TCACACTTACTTTCTCTCAATTCTCCCCTCCCAGAAACCTGCCTCCATT  
AAGGTGACCCATTTATTTTATTTGTCAATACAGTGTTATTCTACATTTTG  
CCCTTGCTTCAATCATTTCTCTGACCGGCTATGCTCTACTCCTTGCTATT  
TGCTGCATCCTAAGTGATTCCCAGGCTCCATCTTCAATCAGAACCATCCT  
ATCCACAGACTTTTCCTTGATTTCTCCAGAGTTTATTCATTTTCCTTCAT  
TTTAATATGACTCCTTGTTTGAGTCATATACTTAGCACTCAGTGACTGGT  
TTCTTGTTTTATGATTCATCTTGTTTTCTTGTTTTATGATTCATCATCAT  
TTGGTGAGATTATCTAGTCTCTGTAACCTTGATGATAACCTCTCAAGGAAG  
GAGGAACACTTTTCAAAATAAATAGGAATCACTTCTTGTTTCATAGAAGTA  
GTGTTTTTTTTTACAAATATTTGCAAATCATAATGCTTGTGATACTAAC  
AAAAGGAATAGTAGAACATCATTTACATTTTCTTTGATTTAGAGTACCAA  
GAAAAAAATCTCACGTGCTTGGAGAAAAAATGCCGTTAACTGTCCGT  
ATCTACAAATATTACTGCATTAAGTTCTGGGAAATGAATGACAGATGACA  
AGTATAGACTATAAGCTTCCCCTAGATTGTGAGTGCCATGGAAATGAAA  
GCCTTAACCATCCTACTGTTTTCCAGGGTATGTAGCCTAATACATAGTAT  
GTTGTACCTAGTTGATGGTCAACAAATAATTTTGAATGAATCAAAGAAT  
GAACAAGTAAGTGAAAGAATCCAGATAAACTAAGTGTAAGGCAATGT  
TTCTGACAGATAAACAGAGGAATATTAACGGAATGGCTACCTGTATTCTG  
ACATAGGGACTCATCTAGATTCATGACCAGAGATAACTTAACCTTGCTTG  
CCTCGAGACAATGAATGTGTTTCATATATTTAAATACATTGAAAATCAGAG  
AAAAATGAAAAAATGAAAGAAGCTTTCTCTGTGTATCAATGTATTTGCAC  
CTTAAGTTGGCCAACATTTCACTTTTGCTAAGGGGATTAGCATTTTGAGC  
ACATTAGAAAATTCATGATATTTCCAAAGCAGTTAAATCCATCTTGTTTA  
CTCAGCAGTTGATTACTTAAGTTAGTGGGTGAAGTTCTTTCTAGGTTGAG  
CACTGGTTTTCTCTGTTTTCTTGGTCTCCTTTATAGTCTATGGCCTTCAAT  
AAATTGAGTACATCACTGACGGTGCTGGAAAGACTAAATCCTCAAAGTGA  
TGGGGTGATTAAAAAAATAAGGATTTAAGGGGATTAGAAGAGACAATTC  
ATGCTTCTTCCCTGCATCATCTCTTCCCTATAGTGACTGGAGATCCTTGGT  
ACAGATACCCTGCTCTCACTACTCATACCCAGGGCTTCAGCTTACCTGAT  
TTCATGAACATTATCTCTATTGCTCATCAAATTCAGCCCTCCAAGT  
TCAGTTGATTTTCATCTGATGGCTGGAAGAACTGATTTAACCCTTTTCGC  
TAAAGCATAGGTGTCTGGGCCATGTTTCCCTGAAGACACTGCATTTTTTAC  
AATTGTGCTAACTCAGATATATATCTACATGTTGGATCTTTTTCAAGGTT  
TTCCAAAAAAGTTCCATTAAACACAAAATAGACTCCTTCTAGAAATAT  
TCTATAACAGGCTAATACTTTTTAAGGAGTCAGTTCCTAGGAATTGCTTCA  
GCCGACATCATTTACAAAATGCCTTCTGTACTTGAATCCCTCAAATGTCT  
CTTTCTCTACAGAGGTCACATTTTACATAAGCTCTCCCATTCACACTTGGA

ACCAGCAAGCCACATATCATTCCAGTGGTTGGATATGTACTGCCTTGGTC  
TCGCGAAGACAGGGGGAGTATGAAGAAGACAACAGCAATGATAGCCGAGG  
CTTGTGTGCATGTGTGCTGGGGAGTGGCGTGTCTGTGCAAAAGCATGTTG  
GAGCAAAGGACAGGCAGTCACATGTGTTATAGATCGTTCATTACTGGGTT  
GAGGACTTCCAGAATACAGGTCCCACACGCTCCTTCTGTGGTTGCAATCC  
ATCATTACTCATGAAATTAATCAGGTGTATAGTAACATAAGAAATAATA  
TCAACCACAGCCTTCTGGAAAAGGAGTCAGGATTTTTGAAATCAATTCTA  
ATGTGTCTCACATTGGGAGTCAAGTAATATGAACAGAGCAGTTACCCAGC  
ACATAAGATTGCTAGACCCAGCCTGTTAAGCCTGAAGAAAAGACACTTTA  
AAAAGAAAGCACTAAAAGGAAGATACTCCAAAATTCAGGAAATGTTGTTG  
AAACCCAGTTCCAGTTGAGAAAAGAGCAATAGAAATGGAGATAAAGGGAC  
ACCTGGGTGGCTCAGTGGTTGAGTGTCTGCCTTTGGCTCAGGGTATGATC  
CCAGGGTCCGGGATCGAGTCTCACATCGTGCTGCCCCGAGGGAGCCTGCT  
TCTCCTTCTGTCTATGTCTCTGCCTGTCTCTGCCTCACATAAATAAATAA  
ATAAAATCTTAAAAAACAACAGAGATAAAGCCTTTTTAATCAAGTGACT  
CTGTAACCATTTTTTGAAGCCATTGAAGTACTAAACTGTGTTTGAGGAAA  
GATGATGTTTCATCATTAATTTTTCTGAAGGATTACATCTACTCAGGAGAT  
CATATAAGAAATGATCTGTTGGATTAATGCAAGAGGAACTTGTCAGCATT  
TAAGATGACGAAGGACCTCTTTGTCTTTCTGGAAACACTGTGACACACGT  
TCATTCTTGCGGGGCCCTCTCTGCTCCCGTTTTGCTCATTTCTCCATGTA  
TGAGAACTCCTGCTCCCCATTTCCCTGCTCCTCATTAGACACCGTAAGGG  
TCACTGACAAGCAGTGGTCTTTTTATAGAAATGAGGGTCTGGCATGAAGG  
TGTCCTGGAGTTTGAATAACTTTCTCTTCCCCTAGGATCCTGCAAATCAA  
AGTTGAGGTCCATTGCCAAAGACTCTGGCTCGGCTGGAGGCAGTGCTTGG  
AAGGAAGGGGGGCGGTTATCTTTGCACTGGAGGATGTCCTTGCTGTATC  
TTCCCTGCTGTAAACTACAGTTTTTCAGAGGCTACTGACCTGGGAGCTTT  
CATCAGCCTTCAACCCACTTTTAATAACAACAAGCTCAGGGAATCCAGGG  
GGCTGTTTACCTGCGTCTGGAACCTCTGACAAACATCTCCTCAGGGTTCTG  
CCTGGGAAGCCCACCTCCGCTTCATGGGGGCCTATCTCCTCCCCTGGACC  
AGTTCTGGAGGTAACAGCAAAACATCACCTTTTAGAATGAAACCTGCAAAT  
AAAAACAATTAACCCACCCACCACCAGCCCCCTCCCTGCCTCCCAGAG  
GTATTTTTGAGCCCAGTGCTTACCTTAATGTTCTGTTTACTGTTTTTCT  
TACTGAATCTTTCAACAGCCACCATCCTGGGAGTTGGGTCATGGTGATT  
CCACGTTCTCATTAATCATCATGGCCAGGGATCCCAGCACACGGGCTGGG  
CCCAGAAGCTTGTGGGCCTTCTTGCTGCAACAAACAGCCTGCAGAATGTG  
TTTGCTTCATATGTCAGACACTGTTAGCTTTGAACTGGGGGCCTGGTGTG  
TGAACATGAAGCCCAGCCGTGTCAGTCTCAGGATGGAGGTGACATCGGA  
GCTCTGAGCCCTGAGATGGTGGGTTTTGGCTGAATGGCTTGCTGCTTAGG  
CCTAGAGATTTAAAAAATGGATGAAATTTGATTCAAGTGGTCAATGTCCT  
AAACGAAGTGTTGCCCTTGGGGATCTTTTGAGTCAAAATCACATGAACAA  
AGTGCTGCAGAGGTATTTTGATTAAAGTTGCATGCTCAATTCCTTGGGCTT  
CCTTCTTCTTTTTTCTCCTAAATTTTATTTATTTATTCATGAGAGACAC  
ACAGAGAGAGGCAGAGACACAGACAGGGGAGAAGCAGGCTCCCTGCGGAG  
AACCTCATGTGCAACTTGATCCCAGGACCCCGGGATCATGACCTGAGCCA  
AAGGCAGACGCTCAACCACTGAGCCACCCAGGGGCCCCAAAGAGAGTTTC  
TTTCTAAAGTGATTTCTCCTTGTTCTCCCACATATGTCTCTCTCTCTC  
TCTCTCTCTGTCTCCCTGGTCTCTGCCTCTTATCACCATGAATGGGATCA  
CACGGCTCTTCTTGAATCAGATTCTTTACAAACACTTTTCATTTCCAATT  
ACCTAAGTGATTTCTCACTGTTCTGGAAGCCTGCTTCATATAAAGTCAAC  
TCTAAAAGTTCAGCATTACAAGCTCCCTGATTATTTCAAGCATATTACTT  
TCTTCTTACCAGTCGAACAATATATGGAGAGTCGTAAGTTCAGAAATCTC  
CTTGTGGAAAGTTAGCTTAAAGAAAAGGAGAACCTCTAAACTTTATACCTC  
CTTATCTGATAAAATTTTTGGGAGTGACTACCCAAAATTTACCGAAAATAA  
AAGGATTTTTCTTGTCTATCAGACAACCTTTCTAGGTATAATGCAAAGCCCC  
AAATCACACACAAGCGCAATGTTCAAGAGTTCCAGAGGTAATGTTCTCC  
GAGAATGTGAAGGCTCTGGTATGGGGATTGTGTTTTCTATCCCTCTAGCC  
TAAAAATCTTTGATGGGGAAGATCTTGCCACCGGGGGACATTTAACAAGG  
TCCAGAGACATTTTTGGTTGACACAGCTGGGGAGAAGGGTTGCTCCTGAC

ATTCAATCACCCTGGCCAGGGAGGCTGCCCAGCATCCTACAATGCAGAG  
GAACCTTCTGCCTCCAAACAAAGAAATTTCTGGCTCAAAATGTCAATAA  
TGGCTGAGGCTGAGGCACACAGGTCTGGTCTATGTCAAAATTCAGCTCAG  
TGCTTTACGGATATTGGGCACTCAATAAATGCTCGAGGAATAAAGACATG  
AATAAATCAAGGTTTCTGAACTAGAATCCATGTTTCATTTGTGCTCATTGC  
TGCTCCCTTATTAATCTGTTTGGCCCTGGATCTTGCCCTGGCTGCCTGGAC  
TCCTGTACCTTCCTATTTCTTCCTGCCCTACCTCAGCTCCAACCTAGGTC  
TATCGGCTTCATCCTGCCCATGGCCTACGCCTGCTAGGCCTCAGTCTTCC  
AAGTCGACAGCCCATCGAGCCAGAAGACCACAACAGCAGAATCAATAAGA  
AGATCTGGAATTGGGAGTGGCAACAGTCGCCACCACCTATTCTAAACAGT  
GACGTCACCTTGATGGATTTTCGGCAACTTTCCCATTTTATGCCAGGCTCTG  
TTGATACAAGTGCTGTGCTCTAATGAAGTTAAACTCAATATATTTTTTTT  
CCTCTAGTTATAACTGGCAATAATTTTGCAAGTTCCCAGCTACCGTGGAA  
TCCATTTGGGGAAGGCAAAAGAAAGCAAACAAGCTCCAGTATGAAATGTAA  
TTGTGGTTGCCACATGTGAAACAGGTTAGCTACCAACTTCTCTTGTTCGC  
CGGACTCTGGTTTACAGACACTCACTTTTGCTTAAATCAAGTACATTTCA  
CTGATAGGAAATGGAGACAATTATCTGGGCATTTTATTGAAAGAAAAATG  
ACTTTTCTGGAAACGTCCAGATTACGGAGACAAAACGATTGTGAGAATC  
TATCGCTGGAGGGTCTCCGAACATTTTTCAGATTACTCCTCAGAGAGATG  
TGGAAATATACTTTATGCCAACGTCTAGACATGTGACTCATTAATTAATG  
CAAACGTATTATATGCTAACTCATGGACCTTGTGTCACGTTTCATCAGCA  
TGAGGTAGAGAGTGATATCTACATAGTGAAGGCCCTGAGGTCCAGAGAG  
GTTGAGGCACTCCCAAGATCACACAGATGGGGAAAGAGGCTTAACCTAAT  
ATCAGAAAGAATACAGAATGAAACCTAAAGTTCCTTAAGACTCTAGAAAA  
CTCTTTAGACAACCATTGGAAAGTTTGACATCTGACACGATGAGATATCC  
TTCATACCCTTCCAGCAATAAAATAAAATGTTCTATTCTCACCAGTGTGAG  
ATTTCCACCAGTTTATGTCTGCATGTCTCCCTCATGTTACCCTTCCAGTT  
AACCAACTTCATGAAAGGATAATTTGTCTCTAAATGGATAGTTCTCAGG  
GCACCTGGGTGGCTCAGGGGTGAGCGTCTACCTTTGGCTCAGGTCATGA  
TCCTGGGGTTCCTGGGATCGAGTCCGTGATTGGGCTCCCCATGGGGAGCCT  
GCTTCTCCCTCTTGCCCTGTGTATCTGCCTCTTTCTGTGTCTCTCATGAGT  
GAATAAATAAAATCTTAAAAAAGAAAGCAGATAGTTCTGTCTCATCT  
TAACGGAAGCAAATCATATACTATTTCAAATCTTTTTTTAGAACATTTT  
TCCTCTAAAAATCATAGGTAAACAACTGAGCCACATTCTAACATCTCACT  
TCGTTTTAGATTTGTGAGTATAAACACTTCATTGTATCGTTAGGTGGAAG  
TCCTTGGCCACCTTAAAAATAAATTTGAGTGCAGTTTCATGAGGAAAAT  
GTTTCCATGGGTAGAGAAGATACTCTGGTAAAAAATAAGGAAAA  
CGGGAGGTACTTATAGCTACTGCAAGTTTCTTTTCTTAATCGTACTTAAT  
TCATCTTATAAGTAACTCTATTTGTACAAGCAAAAGCACACATTTTATT  
TAAGTAGACCAATTTGCAGAGAGCCCTGTACGTACATCTGTAACCTACTA  
TAAACACGAACACACAGAGTCCCTTATGCTTATTGTTTTTTAATATTTT  
TATTTTCATATCAAGGATTTCTACTGACGTCAATGGCAGTCTCAGGATTGG  
AATGAGTAGTAAAGATTTAACAGGCAGTGGCTATAAGAGGATTTTCACTC  
ATTCAGTGAAGAAAAAAGAAAAAGAAAAAGAAAAAGAAAAAGAAAAAG  
AAAAGAAAAAGAAAGCCCTTGCATAAGTGATCTATCTAACCAAGTGAATCC  
TAGTTTAAGAAATTTTCATCCATTTCCGTTTTTATGAGTGGAATAAACAA  
AGCCCTAATAAGAATAATCGAACACGGCTTAAGGTTTCAGATGCTTGAAT  
GTTTTAGTTGGGTGGAAGCTTGTAAATAAATTACTTTCTATTCCAACCCAA  
TACAGTACATTTCCATTTCCAAATACTCTTTACCAGAATTTCCACAATTA  
TATAGGGAAATAAAGGATTAGGAATTTATGTGAAATAAATTTGCTTATAA  
ATTCACATTTTTTATTGACACTTTACAAATTGGTCTCCAAATATCCTATCC  
ATTTTAAGACTTGCAGCAATCCCTGTCCACTTTGCCAACATTTTTTTTCA  
GAAAGTTTCTTGAGGTTGTGAGATATTAATAATATCCACAAGATGTGTTG  
TACTATGAGATCCTGCATCAGATTCTGAATTTCTACTTTCACCACGGGAA  
GGGGATGATAACTTGCCACTTAATAATATCTTCGTCTCCTCTGGTTTTAA  
AATAGCATTTTTCAGGGCGCCTGGGTGGCTCAGTTGCTAAGTGTGAGACT  
CCTGATTTTCAGTTTCAGGTCACAATCTCAGCTTCATGAGCCCCATGTTGGG  
CTCTGCATTGAGCATAGAGCCTGCTTAAAATTCTCTCTGTCTCTCCTACT

ACCATTCCCCACCTCTCTAAAAAAATATTAAAATAAATTAAAAACAAAA  
AACAAAAAATAAAAAAAATTAAAAAAACATAGTCTTTTCCAGGTAATTC  
AGTCTCTGGCAGAAAAAAATTAGATTTTCATATTTCTCCTCCTTCTTCT  
TCACATTGTGTCTAGGTGTTCCCACTAGAGTAGGAGATTGTTTCCCTGAC  
CTAAGATTAGAGAAAGGGGCTCAGCTAATGAGCACCCAAAGAAAACCTAA  
TACCATTTTTTATAATCTTAGGAGATGTTGCGGGGGTGTTGGTGTGCACAG  
ACAGAGGAATAGATCATGTAACCTATTTGCTCTGCCTCATTTCTGATAAG  
GAAAGAAATTAGAAAGTTTTTCAATTTCCATTTTTTCCAACAATAATACTG  
GTTATTTTTTTAGTCTTCAGAGAGGAAATCTGCATTTGTTAGAACTCGGAG  
CTTTGTAGTCATTTTAATAACACACAGAAGTGTTTATGTGCATGGGATGG  
GGGAAAAAGTGAAATAAATTTTCTGCAATTTTTTTTTTTTTTTTTTTTTT  
TTTTTACTTCCAACCTCCACTTCTAACTGGTTATGCCAGCAGTGGCTGTGA  
ATTTACGCTTCTAGAAGCAGATATTGATAATTCACTATACCTATGTTATC  
TGTTATCTTGGGAGGAGAAGAAAAATATCTGGCTTTGAAACCGATATGGG  
TCTTGGGGTAAAAGCGGGATCAGTTTTCCTTACGTGGAATCCCTAGTGCAC  
AGCGCTGCTTAAGGGGAAGCCTGTGTTCCCCTCTTTCACTTTGTATGAAA  
AACATAAATTTCCCCCGAGTCCCATGCTAAGATCCAGGCAGCAAGTCTCA  
CAAGCCTGATTTTCCCGGTTCTCCCCCCTGCACCCCGAACGCTGTTCCC  
CTGTTCCCCATGAATCACACAGGCCTTGTTTTTACCACCCAGCTTATTTG  
ATGCCCGTGAAAGATGAATGGCTTTGCCTAAAACAATTAAACAATGGCAA  
AACCGAAGTGACACAGAGTAAACCTTACTGCCCTGCAGAGCTCCCTTT  
CTCTTTTTCCTGTTTCTGAGACCAGGTCTGGGTTTCTTTGCCATCCCTCG  
TATTTGCTGGAATCTTCTAATCACTGGTGTTTCTCTTTGGAAATTTGAA  
ATTCCGGTCATTTGTCTTTTCTCATTTTCTTTCCAGGAGGAAGCAGTGCT  
CTGTATGAAAGCTCTACCGGATAGAGCATGTGTGGATCTGGATGGGGTCT  
TGATCCTGGCACTTGGGACTATGTGGCTCTGACCCCTGGGTCTATCACTT  
CAGGATGTTACTTCTCTCACTTGCAAAGGTGGTTGCCTTGCTTTGACTCT  
TAAGGTACTTGGGAAGTCACAAAAATATGATCTATATAGAAGCAGCTTGG  
AAATTTGAAAATGTGCTGAATAGGGGGTACCTGGGAGGCTCAGCCTGTTG  
AGCAGCTGACTCTTGATTTTTGCTCAGGGTCTGGGATCAAGCCCAGCAT  
GACGATCCTGCTTGGTGGTGTGGTAAGGTGTCTGCTTGAAGATTTCTCT  
CCCTCTCCCTCTGCTTCTCCCTCTGCTTCTCTCTCTCTCTCAAATAAA  
TAAGTAAATCTTTAAAAAAATAAAATGAACTGAATAGGAAAGGAATCAG  
ACCAATAAGTCTTATGGCAAACGTTAGCAAAGTCTATTCCAGTGTTTCCT  
GGAATATTCCTTAATTGGGACAGAAATACTTAATTTTTTAATGGCAAGTAG  
CAATCTGGGTGGCTGTTGCTATAATTACATTTCAAATTTCTACCTTACC  
ATGAGATATGACTTGATTGAGGACCAAATCTTCCTTACCTGCAAAGTAT  
TTTGCCACTAATTTGTATCACCTGAAAATGCAACCATGAAAGCCCTCAA  
TTGTTCAACAATAATAAAGTTTCTGGAGAGTCATTGTGGCTTTCTTCAC  
TTCATGCTCACAGAGCAAACAGGTTAAATTATATTTGGTTTGGCTGCCAG  
GGTATGTAGAAGGCAGCACTTATCAGGGACCAGGATTATGGGTCTTTATG  
ATGGTGGTAGAGTGCCCTGGAGAGTGAAGCACATTTCCACGATGAGCACT  
TCATAGTGTTGCCTTGAACAGCCCTCATCTACGCAGCCCAGCAATGAGCT  
AGCTCACCCCGGAAGGTTGCAAGGGTGCTAATATACAAATTCCTTTCACAT  
TTGGCATCCAAGAACATCATGGTTCTCATTCTAGCACATCTGAAGACATA  
AACTTGAGCTCTTCCAAATCCATCAGATAGTCCTTGTCTCTTTCCAAATC  
CTATAAACACAGGCAAGGAGGCAGGGATTTAGTGATGTCACTCAACCGAA  
CAACCCTTGATGAGGCTAGATGCATTTCAGCCTACTTGCCCTGTGCCTGTC  
AACTTCTGCTTTTGAGCTTCATCGTACATTGGGAGGATTTATTCTTTCCCT  
TTGTGTGACAGGGGAAAAATAAGCAAGGTAAACATCAGTTCTCTTGGGAC  
CAGAGCCTTTAGGAAGCAGCCCAAGGTATCACCTATTCCCAAAGTGAGAG  
AAACATCCCTGTAAGTATCAGAGGGTCACATGGCCTAACTTAGAAGGGAC  
TCATGTATGTACGTGGATCACTGAAACGTGAGGATAGCCTGGTGAGGGTG  
AGCTATCTCCAGGGATGTGTGGCAGTAACTTGACCATGTTTGGATGAGTG  
TGTCCAGGTGGTTCAATGCCATGGACACATACTACTGAACATCTGTATTG  
GTGAATTCAGTGTAAGAGAAGCCAGGACAATGAGGCCATGGGGGAATT  
TCAGGTGAAGCAGCTTGCTACCCTCTGGGAATGGGGGCAGTACGTGCAGG  
CTTGTGTCCTTCAGAAAAGAGAGCACAGAGACAAAAACCCATGAGTGGTC

GCCCCAACCCCATATGAGGTGAAATGATAGGGGGAGTGAAAACAGAGAT  
GATTGATAAACTCCCTCTTGAGACTCCTTTGTAAAAATCCACGTGCCTAT  
GGTCTTTAAAAAGGATTAAAGAGATTAAAAAACAAACAAGTGGACAAACA  
AATTTTGGGGGCCAATGTGGAAACACATGGTACTTGAGGGGATTAAGGAG  
AAAAGCACAAACAAAGAGAGAGAAACAAAAGACAGATTTCATCTACCAATTGT  
ATCCATTTTTTAGGAATTGGGATAAAGAGTCCCCTGAGGAATGTTTCTGGA  
AGAAAAGGATTAATCAGTCGATTCCCTGAGAATTTGACCCTTGATTAAATC  
CTCCTTGCCATATTGACTCAAGTTTCCAAGATTAAGGAGCCACAATTACT  
ATGTTCCAGATGAAGCTCTTCTCTTTCCCTTGTCAGGTTGTTTATCAAGT  
AACAGTGGCAGATATTGATGACATGCAGCTGCACGGAGAATGGGACTCG  
CTAGATACCCCTGAGCCTGAGGGAGCTGCAGGACTTAAAACTATTGAAA  
GTTGAAGGGCCCTAGAGCCTATGGCTTCCCTGAACAAAGGGGATCCACGT  
CCCCCAGTACGCCCCCTTCAATCACACCTATCCTTGGTGTAGGGTGGTGG  
AGACAATGGAAATTGTGCCTGGGAGCCACACACAGCCACTGCCGTGCTGT  
CTCTGCACATGCTCTATCGTGCTTGTCTCTACCTTTGCTTAAAACTAAAT  
AAACCTGGCACTGGCTGAATCTATTGTGTGCATCTGACTTGCCAGTCTGA  
ACTCAACACTGATCAAGTCTCATGGCTCTAAAGGAGAGAGAGGTGGGATA  
AGAAAACCCCTCCTGTGAACCTTGTAAGAAGTGTGTTGGGGTGAGAGAAACAG  
AACATCATGAAAATGTCTGGATCCACTATTCTAATTACATGATTAGAA  
TATTCAGATGGGTGCACAGGTGGGAAGGCCAGAGAAAAGGAACATGTAC  
TTAGCATGCATGAATGAGTCAAGGTCTCTGTGCTGAAGAACATTTAGCAC  
GTAAATTTCCCAGCAATAATTTAAAATGATTTATGTAGAAGAAGAGCTGCC  
AATGCTAAAATGTCCCACCTAAATACTGGTGACATGCTATATGCTTTTCC  
TAGTATTTTTCTAGGACCCCCAAAGAATCTATTTGAATAGAAAAATAATAG  
AAGTTCATGACTTACTTAAACACCTGTGGTTTGGTGGTTTGGAGGTTGGA  
TACAACATCATTTTTCCATACAAGTAATTTAGGTTAAAAGGAATTTAAGTA  
GCTCAAAGCTGAACACTGGATTCTGTTGCTTTGGGGTTCACCTGCTAATC  
ATTCATTTATAGCATATCTCCTATGGATATTTTTCTGTAAGTCTCATTTT  
GAAAGCAGTCTATTCTGACCATATTTTTCAAGGAAATAAAACGTGGTGGT  
GATTTAGGAGGCTCTTAAACAAATGTCATTAGTAAGGTTTCGTAAAGCCAG  
ACAAAGACAAGCACAAAGACAAGCAAATCTCAACAGTTCGGTATTGACAA  
GAGCATGGGCCCCGATGTCAAGAAGGCTAAGAAAATAATTCAGACAGAATC  
TAGCAGCAAATAGAATTTAGCATTTAAACAAGCAATTAAATACATTGTGT  
AGTTGCAAATAAAAAAATGAAATGAAGTTGGTTAGTGTTTTCACTTTGAT  
TCTGGGACTTTGTATCACAAAGATCAACTCACCTGGGGGACAGACGCTGGG  
GATTTATATCTCCATGATGACTAATAATGATCTTAAGTTTCCAGGGAGTG  
TCAGGTGAATAATTACCTTGCGCATTGCAACTCTCCTGTCAGTTATGGAG  
CTTCAGAGGACTGAGGCACCATCTCCAACATTCTGAAACCATAGAGTTG  
TTTTTATGAGTGATCGATCACTATTTAACTTCTACCAAATTTTGATTCCC  
TTTTACCATTTCTTCTGCCCCCTCCCCTACCTCTGGCCACCAGTCTAT  
GGTCTGTATATATGAGCTTGGTTTTTGTTTTTGTTTTAGATTCCACATAT  
AAGAGAGATCATGCAGTATTTGCCAATTTTAGACAATTTAGTATTTTAGA  
TAATTTAACAAAATAGCCTTGAGTTCCAGTTTAAAAGAAATAATTGAAT  
AGCTAATCTTAAACTGAGATTTTAAACGGATTTATTTCTCATTTATAT  
TAATACATTAGAACACAGGCAACCATTTATTATGGAAGTTAATTTTGCAA  
TCAGTGACACAGATGCGAAGCATTTACAAGGACCATGCAAAACAAATAGT  
TTTCTAAGTCCCCTGGGTGAGGATGAGGAACAGGGAAAAGTTCACAGCTGA  
TAAGATATAGGGTTCGGATGTTTGGAGGCTAAGAAGTTAGTCACCTTTAG  
TTAAAGTTGGAGCCTTGGATTTCTTTTTTTTTTAAATATATTTTATTTATT  
TACTCATGAGAGCAGATTAAGAGAGAGAGAGAGAGAGACACAGACAG  
AGGGAGAAGCAGGCTCCATGCAGGGAGCCGATGTGGGACTCGATCCCAG  
GACTCCAGGACTACGCCCTGAGCCGAAGGCAGGCACCAAACCACTGAGCC  
CTCAGGGATCCCCGAGCCTTGGAATTTCTAAAGGTGTTGTGGTTCCTAA  
CACTCTTAACCAACTCAGGCTTAAAGCAGCAGAAAAGCCCTTAATCCTTT  
ATTGGTATGAATTAGTTGTTGTTTTTAAATAAATTCAGTTACTGTATTCTT  
TTTTATTACAATAATTTTATTTTTTAAAGAAAGAAATATTGGGCTACCTTC  
ACTTAAATAGTTTTGAGCTGAAATAAAGAAAATTTAAGGACCATTAATG  
CTGTATGCTTCGAAAACATGGTCCCAATTTTAGGTGCCATGATCCTGGGT

ACTTAGTCCTTGAGTCTGGATTTGCAGGGGCCTGGTGTGTCTATGAGGAA  
TAGAAGAAGTGAGGGAGCCGACAGTGATGCTTCTGGAGATGAACACAACA  
GAATGCAGATATTCACCCATGTACCTGGGGTCCACCTTTACAAATTCCAG  
ATCAAAACAATGCATTACACAGGCATCTAAACACTGGAGCAGTGGTGGTA  
TCTTTTCCAAATTTCCATAATCTCCTTCTAGTTAAATTTCTCTTTGGTAG  
ATATTTTGTTCCTTGAACAACATTTCTCCAAAGCTGACCTTTCCCATGCCT  
TACTGAATGTTGGGGCTTTGTCAGAATATTTATTTTGTACATCCCCAAT  
TATGAGGTATGTCAGAGGCTGTGGTTGTCTTTTCTCCATGTTTGTAGTC  
ATTGGAGATTTCAAGCTCCATCCAGACTTTGCTACATTGCCCACCTTTTTT  
TGAAATGCCTTTGTTTCACTTCATCACTAATCTCATCGCGAAAAGATTAT  
ACCCTGGAGCCCACATTAACATTTCTCCTAGGTTGTATTTTATACAGCTCT  
GACTCAAAAAGATTGAGTTTGGAAAGCCTTCAGTTTTCACATGTCCCTTATG  
CTAATGGTCTATTTCGGTAACCTTCTAATATTCGGTAACCTTCTAACAGCA  
ACTGTACCTGCCAAATAAGTGAGGGGGGAAGGAACACTTTTATTTAGATT  
GAATGCAAAAAAAAAAATTTCTATTTTCTTGTTTATTTAAAAAAAAAAG  
AAACTAGGTTGAACAGAGTTAGAATCAATTGAACAGTTAATCTCTTTTCT  
TATGCATCTAAAGATATCCCCATGTGGAGATTGATCAGTGCTAATATATT  
CAATATATTCATCACCCAAAGGAAAGCTCTGGCTACTGAAGTGAGGCTAT  
AATCCATGGGATTTCTAATTTTATAATTAATTCTCAACTGACCTCTGTC  
CCACAGATGTGCTTGGAATCATTTGCAGGTTCTGCTGCACCTGACACCT  
AATGAAAGGTCAATTAGAGAAGGGGAGTCCTTCCCTAGCTAACTCCAGGT  
TGTTTACCTCGTAATGAAAACAAATCTTTTTACTACAAAAGCAGCTTAC  
TCATTTGGATGTCCCCCTGCCTCGTTCCCTCTCAATTCTCCTTGCAATT  
TGGCAAAACAAAGCGAGGCCATAATTAATGTTTTTTTTTCCCCCTTTCC  
TCCTTTACCTGGGTTGAACATTATGGGCAGAATTTCAAGATGATTTATGA  
CATCATCTCATCACCCAAATATGGAACCATTTACATGAGAAAAGATGTT  
TCCATGGAGAAAAGAAAAAGAAAAAAAAGGACTCATCTGAAAAATAAA  
AGTAACTTCATAAAATGTGAAATTCACCTTTTCCAGAACTTCAGGATG  
ATATTGTATCTCCCAGACTAGAGAGAGCAGTCAGGGTAAGAAATAACAAG  
CTGAAAGTAGGCTTCTAAGAAACAGAAGAGAACTAATAGTTCAGTTAAC  
CTATCAAGGATAGACTCCGCAGAGAAATAAAACCAAAAGAGCTAAGAAC  
ATCCCCCTCTTAAAGTTTGAAAAAGAAATGAAGAGATGAAGTCCAGAAAATA  
AAAATGAGAGACAACGATAACAAGATCTAATAACAGAAATTGCAGAGAAT  
GAAATAGAGAATCTGCAAAGTGAAAACAATACCCAAATCAAGAAGATGTA  
AAACCTAATCTCCAAGCTAAAAACGAATGGGATCCTTCACATCAAGAGGT  
TACAAAAATTCTAAGAAAAAAGATAATAAAAAGCTACATATATATGTAA  
ATATATGTATATAGTACATTTATAAAACAAATATATGTATTTATAAAATT  
CAGAAACAGATGGGGAAAATCCTATAAACATACAGGTATGTTGGTTAAAC  
CATTGCTTAGGTATCATAGAAAACTTTAAACACTTTTAGAAATGCAAGGG  
CTCAGAACGTAGAACACCCATTTACCCAGAGAAAACTCTGGCCAATGGA  
ACATAAATAAAAATAATTAATTCAATACCGGGAAAGATAAGGTAGAAGAA  
AAATGATGATGAACAGTGAAACCACTAAAATATAAGAGGATTAGTAATTG  
TTAAAGTCATTGGGACACCAAGAAAATGTACAAGTAGTTAGTCAAAGAAT  
ATGAAAATTGGAAGGTTGTCAGGAAGAAAGAGAAAGTAAGGGCTTACAAA  
AATTCATATTTTTTTCATAATAGAGACAATATTAATGGCTTTATCCGCAT  
CAAGCACAGAGAACTACACTCATATTCTATGGTACTCACCTGAATATTT  
GCTTACAAACAAAATCCAGCTCTGATGAACTTAAGTAGACAAGGGATTCA  
TGGCAAGGGCTTTAGGCAGCTCTCTCGTAATGGACAGGGAGTTTGAAGAA  
AGAGGTTCAGGCAGAGACAGAGGAAGGCAATCACACCAGAATCCTGAA  
TGAGAACATGATTTGTATGCTTTTACCAGAACCATCATCCAGCGCCCTT  
GCCAACGTGGTTGGCACCCTGCTCTTCATGCCATGACCAGCTGTGGGGT  
CTTAATTACCCTGCCACCCTTGGGAATAAGCTTTGCCATAAACTGCATCT  
CCATCTCAAGAGAACCACCAATGTGCAAAGTCCATGGTAGGGACCTCCA  
ACTGGCTGAGCTAAGGACATTTGCCACCTCTTGGCTGCCAAAAGGATAC  
AGCCATGTATCCGCTCTGCCTCCCCCTTGATGGGATATCTGTAGTTTGAA  
AAATGTGACAGAACAATTGTCCATTCCAGAAAAACACACACACAAAGGTA  
CATACACATCCTCACATTTTTTAAATGCCGTGAGAATTGAAGCCCTTTGGT  
AGAAAAAATAGAAAAGCATTGGACTATATAAATTATACATGTATATATAT

TTTTTCTTGAGTCAAGGGTTTAGAGCAGCAAAAGAAGACCATCATTCTA  
GGAATGATGCTTAAAGTCAGCACGAGACCTCTCATTCTCTTCAGCACA  
TCCTACCACTCCAATGGAGGACCACAGTCACCACTACATTTGGCTGGAAG  
ACCAAACGCAGGACTGCGAAAATGAATGCTTATGTCTCTAGTATAATGAG  
GCTTCAGATTTCAGGTAAACCTAAAATGACTCTTTTCCCAGTGAATTTTAC  
CTAAATGTCAAAGTTGTGTGCCAGGACTAGCTCCAAATATTTTCATTGC  
CACCTGATCTGGCCTAGAGACAAGAACATAACTTATAGAGGCTCCAGTT  
GCAGTGAACATACAGTGAGTCACTTTTATTTTATAAGGATTTCCCTGCC  
AAGTTCTAAAACATGGAACCTTGCATTAGCATGCTTGAGACAGCACACAG  
TGTTTGAGGGTCTTCATTGATTTCTGCTTCTCAACATTTTGGAAATTTA  
AAATGGCCATGATTTTCAACTTTTCAAATATTATTTTATCCCTTTGCT  
AAATCTTGAGGTCTAAAGATGTCAAGATACTATCCCTCTATTTTTTTCTT  
TATTTAGATAATTTTGCTGTTGCTTTATGACTGTTCTTCTGAATATCAAT  
GACCAATCCCAGAGAATTTTATCTCTAGGATTTACCTATTCTTTTCAAAT  
GGAGATTTTCATCCTGATGCCAAAAATTAGAAAAGTATCTTCAGATTTTTT  
GATAACTTTGATAGTTACTGTCAAACCTCATAAATATTATTTCAACTTAT  
ATTAGAACTACAGGACCCAGCTTACATATCCAGAGGATTATGATGTTTCT  
GAGCTGAGGTTGATGATAGTTTAGTCATTAGTCAACGAATACTTAATGGA  
CTACCTGTGTACCGAGCACACCTCTAGGCATTGGAAACACAATTGTACAA  
TAAAGACAAAAATCCTGCCTGCCCACAGCTTCCATTCCAGTAGGAGAGGC  
AGAAAATTAATAAAACAACCAAAGTAGAGAGCCGGTTACAATACGATAAC  
TGAGGTGGGGGAAAACACACAAGAAGGAGGGAAATGGGTTTGTAACTTTA  
AATGAGGTGGTTATGAAGGTCTTACTTCCAACATGACTTTAACACATGGA  
CTTGAAGAATGTGAGCGATGATGGCTGTGACATCTGGGGAAAGAACTCTC  
TGGTCGGGGGAAATCACCTGTAGAAATAGCATTTGAATAGCCCGTGAAAA  
GACCACAGTGTCTGAGGAGTATGAAGGGACTAGTGCAGCAGCCACGTGGG  
CACAGCAGGTAGGTGACCATGCTGATGCTGAACGTACCTGAAAGATAGTC  
AATGTGCTCAGAAAATGGCATTAAGCCATTTTCATTAAGCCATGCAAGGAG  
CATGGTAAGGTGCTTTATGTGTTTCACTCAGCAGAGAAAGGGGAGTCACA  
GCAAAAAGGGACCCTCAAGCCGTGCCATCCATGTGGATGGAAGGGTGCCA  
TGAATACAGGAGAGCTTAATAAACATTTAATGAATTAATCTAAAGCAAGC  
TCATATATGCAAAGATGCCAGGTTAAGAACAGATGGAAAATATGTTTTTT  
CAGGTCTTCATCATCGTTTGAATATTCATAGTCTGAAGCACAAGGAGGGA  
AGGTGCTGGTTTACTGTACATGACCGAAATGAGATAGATTTGAAGTTGTG  
AGTGGTAGCAAGTTAGCATCTTGGCAGAACAAAAAGGCTTCAAGGAAAT  
GTCAGAGACAGAGAGCCCTGGTGGCCCTCAGAACTGGAGAAAATAAATGT  
TCCATATAACAGTTTCAGTTTCGGAATCAGATACTAAAAGGGAGCAAATCAC  
ACTATCTTAATTCGGTAGCAACACTTTCCCTTGGCCAAGAGAGAGGTTGT  
GTCACAGTCTCATCCGTCCTTCACAGCCGATGTCCATAAATGTCTATTGA  
ATTAATTGCAGGTTTATGCCATACCTAAGGAAAGTTCTTGAGGCACCGA  
GTTCCACACTACGACCAAACCATCTTGTCTAAGCTTCTCTCAGCAGCTC  
TGGACAAAAGCTCTCTGTTGAGAATGAACACTTTGCCAAATTGGCAGCAT  
CCGTTAGTTTTTCTTTTTTCCCTTAGTTTTAGAAGTCCATGATCCATCTC  
GATCCTGTCTTGCCTGATAAGATTTTGGCAGACTATAGACTGACTTGACC  
TAGAACTTGCTTTTTGTTTTGTCCGGAGTTTTTTGTTCGTTTGTTTTT  
GTCTGTTAGCATATCCATACCAATCTGATGGGCCAAAAAGTGTACCAACG  
CTTGTCCTTGTATCAGACATCATGCATAAAAAGAGAGGATAGAAACAAG  
TATTTCGAAGATTCTGCTGCTTCAAAAATAAAGCAACACTACCTTAGTTA  
TCATTCATCACTGCTCTTGGAGGCAAGTTCTTTTACAAATGAAGAGAATG  
ACTTTGAAGCAAGTCAAGACCACATTGCTTATCATAACATAATCAGATTGA  
GCTGATTTGAAAATTTCGTGCTGTTTCCCTACAATACATCCATGCTCTCA  
AAGCTGAGTTAACTCTATGTTGGCGGATGGATTAATGAGGGTTTTGTCTG  
ATTCTTTCCTTACATATACACCCTACCTCTGTGATATTCCAAATTAAAA  
ACCTTCTCTGCGTGTTTAGCACAAAGCAAAAACCCGAGGCGAGGAACAGT  
GGGACACTGAGATGGGTTCAATTCCCTCCACTCAGATGTAGGCTATGCTA  
GGGACCTTATATCCACCATACTAGGTCACCTTTACAACTTGATATTAA  
ATAACATGGTGATCTTCATAAATTTATTTTTGAGGACAAGAGGTAATAACA  
TCTCTTCATTTAGTTGTGTTAGAGCTGATAACTAGCAGAGCTGAGATTGG

ACAGCTGTCCATATGTCTCCAAGTCTTTGAAATCTATTTTTTCACTGTT  
ACTGTCTTTCTTACATTATTTTTCTGTCTAGATTCTCCCACTTTTCCAAA  
AAGTTTGATATTTGTAATGTTATTAATTGCAACAGACAAAGCTCTCTGAT  
AGCAGAGCATATTCTTTTTGAATATGGCTGGGAACCCCTGGGTGTCTTTTT  
TATTTAAGATCTTATTTATTTATTTATTTATTTATTTATTTATTTATTTA  
TTTAAGAGAGAAAGGAGAGCTCAAACAGGGGGAACAGCAGAGGGAGAGGG  
AGAAGCAGGCTCCCCACTGAGCAAGGAGGCTGTCTGGAGCTCTATCCCA  
GGACCCTGGGATCATGACCTGAGCAGAAGGCAGATGAACCATCCAGCGCC  
CAGGTTGGCATTCTTAAGCAGTATAGTTGGAGCATCTCAGCATCTAACAC  
CACAGAACCTAATTACCACCTGCAGTAAAGGTAAGAGCAGAATGTATCAA  
ATTATTTACAGAAGTATCCCCATTTTATGAGCATGCAGACTTAAAGAGAT  
ACACACAGAAAAAACAAAAATAAAAAAGTGAATTAGATATTCAGTGTCA  
CTCATAGACCTCAATCCCATCCCCTGCCCTTTGAACAGGGTTGAACTGTG  
AATAACAATTGAACTGAGAAGTCCAGGGACTTCTTCAAGACTCTGGGGAC  
ACTGGCAGACGGATTGGTTTACACAGGGCACCTTCTCAGCATTTGTGGCC  
ATCCCATATTACCAAGAAGAGAATATACGTGAAAATCTCTATGCAAAATT  
TGTTTTTCATTTATGAATATCATTATAAATGCAAAACATGCTAATTGTATA  
CTATTAAAAATATACAGACATTCTAGGGACCCCTGAGTGCCTCAGTTGGT  
TAAACATAGGACTCTTAGAGCTCTGGTCATGATCTCAGGGCCCTGGGATC  
CAGCCCCACATTGTCTGGGGTCCCAGCTGAGTGGGAAGTTTCTGATGGAGA  
TTTTCTCTCTTTCTCTGACTCTGCCCCCTCCCCCAGCACATGCTCTGTCCC  
TGCCCCCTGTCTCTGTCTCTGTCTCTCTGTAAAATAAATATTTTAAAT  
AAATATTTAAAAAATATACAGAATTTCCATCCATAAGCCCATTAATAAT  
AAGTAACATATGTAAACAAGTTAACACATGTTTTACCAAAATTTTAAATC  
CTACATTTGAAAAATATAACATATATAATACATTTTCGGCTTACCATATTG  
CATGTTATAACATACTGTATACAACCTTTCTATTTTATCGTAGATGGAAC  
AGCTCATTTCTTTTAAATGACTACCTTGTACTGTATTATTTAGTTATCACT  
GCAACATTTCAAGTTTACTGTTTCTAAAAAAGGTGGAATAAACATTTGT  
ATACATATCTTTTTGTTTTTATATTTCTAAATGTTATTAGAGTTAGAAAG  
GACTGCTTTGTAGGTACATTATATAAATTAGATATAGGTTGGTTGTTTACC  
AAAATTGTGATACTTTAAATTTCTACTGATAGTTAAAAGTAAATGACTGT  
TTTTTTTTTTTTTTAATTGTCCAACCTGGGGTATGACTCTTTTTGATCTT  
TCCATTTGGATAAAGAAAGCATCTCATTGTTAAATGCAAATATATCCCTT  
ACTGCAAGTTTGATTCTTTTGAAAGACTGTATTAGAAATTTGTATTTTTC  
TGTGAATTGCCCATTCATATCTTAATGTAATTTTATTATTGGAATGCAGA  
CTGATTTCTAAATGTCTTTCTGGTTGATTTTTATACACTTACAGGCATTA  
ATTTATTACCACATCTGTTGGAAATATTTTGCTGGGTCTCTTTCAAGA  
GTCATCCTGACTTTTGGTCTTTGTTTATTTGCTTGTTTTTGTTACACAA  
AATGTTACGTTTTAATTCAATTAGAATAACAAATATTCTTTTTTCTGTTA  
TTTGACTTAATGATATCCTTAAAAAGAACTTTCCACTTACAGTTTATTTT  
AAAACATTACCTATATTTGCTTTTATTCCATTAAAATCTCTATATTTACA  
TTTACTACTTGGTACATAGAGCAAGGTTGGAATTCAACTTTAAACAT  
TTTTGTATTTATTTACTTTAAAAATAGTTATCCTTAAAGTCTAAGGGCTT  
ACAACCGGTACAGTAGTCTCTCACAGAGCTGTATTTTAGGGTGGATAACA  
TCACGAAGCATTTTTATGAATAAGTATTTACATCTAGCAAATATAACTA  
TGTAGGTAAGTGTATATACACATAAAACTATACATATAAAAGTATATATG  
TATGAGCATACACATAATTATATTTAATATTAGGATTATGTATATATGTA  
AAAATAATCTTATCTGTACACCAAATATTTTAATTTGTTTGAAGTGT  
TTTTTTTTTACCAAAATACGAATCTTAGAATATTACAAACAGTAAATAAA  
TTTACACATTAAATTAGAGTTTATAATTTTGTATTTAATGTAGTTCCT  
GAAAACCTATGTTAGATTCTGAGTTCAGCAAATCTGAAAAATTTTTT  
TTTTAACAAATCTTTCAAATAGGCTGCTTTTACGGTCTTTTCAGGAAGCA  
ACCCTAAGAAATATAAACTTAAGATAAATGGACCTAATTACTTAAATGA  
TGATTTCTGTCTTTAAAAAATTTGAATATATACTTTATCTCATCCTAC  
TTAATAACATAAACAGACATAACTGAAGACTTTTGTAATAATACCCTT  
TCCAGTTCAATTATCCAGAACACAACTTGAGTCAGTTTATAAGTAAATTG  
ATTTTCAAGTGGTGGCTTTTTTTTTTTCATTTCTAATAATTCCTAATATA  
TTTACTTTCAAAAACCTGGGTGCTCTTTTTTTTTTAAATTTTTTTTTTCTGG

GTGCTCTTTAATACAAAGATGACAGTTAATTTTCATCTTGTGCTGAGAAAA  
TTTCAGAAATGCATGTAAAGGAGCCTCAAATCGACCCAAGTTTACTTACC  
TTGAAAACCAAATTTAAAATCGAAACAACCTTAGATCATATGATTTTTCT  
CTTTTTTAGCTGCTGCTGTTTGTAGCATACTAGGATGGAGAGAGAAGAGA  
AATTCGCTACATGAATATGATTCCACTTACACTTAACCTAATATGTAGA  
AAGTTGTTTCATATTTGTTAAGCATCTAAGATCCAGCATGTATCCTAAAAA  
TGGAAAACAGCAAGGCTCTACTCCAAAATAAAGGAGAGAAAAAAGAGAAA  
GAACAGATTATACCAATAAACAATAATTTGAACCTCTGCTTTTTAAAAAAT  
GCAGTATCAACCCTAATAAAATAGATCTCATAATCTGTCATTTCCCTCAA  
GTCAAATCTTAAGTCAATAAACATGTAAATTAGACGAAAATGTCTCTCCA  
TGGATATTTGCTTAAGTAGTTTCTAAATACCACTGTATGCAGAAAGAAAT  
GGTTTATTTTACTATGCTCTTGCAATTTAAAAAGAAAAATTCATATTACAG  
AGACTATCTTGAACATCCTTTAAATTGTTTTTTTTTTTTCCCTTTAGCC  
CTGCATTTTTAAATTAACCAAGAGAAATTTAAAGAAGAACCAGAGAAAACC  
AGTGCAAGATGACAGGATGATTTTTATTTTATGTATGAGTCTAAATGAGAT  
TTTAGAGAATGGATACCGTATTCCCTTAAGTGGATCTGTGTGGTCAAAGAC  
CATTAGGCAACTTTGGAAGATTCCATAGGGACACCTGGGGCCAGACGTTT  
GTATCCCCTGACTGAGTCCACTGTTTGTCTTTCTGCATGGAGAATTAA  
TAAATGTATCAATCTTCTACTAGCGGCCCTGAACTAGAGAACATAAAGGA  
AATAGAATAAGTGGGAAAAAAATTCACATGTGCCATTTCCCTTCCCCTA  
ACTCCTAATCTTCTCTCTTCTGCGCATTGAACTTATTTTTCTTTCAGATT  
TTTTCATATTATTCTTTTTTTTTCTCTTGTATTAGTTATGTCTCTTAGCA  
TTCTGACTTCATTGCCCTTCTCTGCCTTAAAGTGATGTCTTACCACCTG  
GGTGGGGGCTGTAATTTAATGGAATTGGCCACCTTTGCATACCTTCTGCT  
CAGAAGATCAGTCAGTGGCCTTGAAGTGTCCGATTTTCATTAAATGATTTT  
AGTTTCAAGGGGGAAAAAAATTTAAATGGAAAGTTAAGGAACTGCACTC  
AGGAAACACGTATGGTGCCAACAGCCTTAGAGCACGGGATTCCAAAAGTC  
ATTTCAACATTTCTGAACTGATAAGCTAATTAATTATTTAAACAGAAACA  
CTCTGAAGATACCTATGACCAAGGTTAGAAATACACTCCTTTTCAATCCC  
TCTTTCTTTCTTTTTGTATTCTGTAACTGCAGAGTGTGCTTTTCAAGTG  
CACCAGGATGATTCCAAGTCAATTATAGAGGTTTCAAATCACAGCAAAGA  
ATCAGAGGAGCTAAAAAATACATAAATTACATTAAAAAAAGATTACTGGT  
TGTTTTTTTTAACATTTAAATCTTTGTTGTACACCAACCGTTTCAAACTC  
TACTGTGGCAAATTTAGAAATATAATGCTAGGTATCATCTATCTATCTA  
TCTATCTATCTATCTATCTATCTATCTGAATCAGCTGAACGTCCTC  
CCCCACATCTCCCCTTACAACCTACAATGGTTGGTCCATCACTCCTGTTAC  
AGATGGCTGGAAAGTAAAGATAGTGAATCACAATGAAGCAAATGAAATG  
AAATGAAGTAAATAAAATGAAATAAAATGAAATAAAATAAAATAAAATA  
AACAGTTCTGTGAATTTGTTAGTGAGAATTTATTGTGTGGGTTTCATAGTC  
TTAAAAGCTGGTACCCAAGTTCCTCTAAGGCATCCGTCTTCCTTTAGTCA  
AATAGAGTGGTTAGTCATTTTGGTGTGGAACATAGAAAGTGAGGGACAA  
ACAAATCCAAGAGTTGAACTGCAATATGATCTGTATGTTCAAGTTGTCCTC  
CTAAGAGGAGAGGAGGAACAAGCTGGGCATCCTCATTAGATTCTGGAGCT  
CAGGTTTGTGTAATGGTCATGGGATTTTGAAAGCACAGAGGCAGAACCA  
CTGAATTTTATATTCTTAGCATCACTATGATATAAATCTCTTTACCCAAT  
TATTTCAAAAGCCAATTTAATATAATGTAATATAATATAACATAAATAAT  
AAATGCTTTTCGGTATCAATTTGGTTTTCTATTTCTGGGGGGGGAGAGGG  
GTCCTTTGACTTCTGTAGAAATAAGTGAAAAGTACTGAGTGTTTTTTGGT  
CACACAGAAAGGGATGGCAGAGTAGGTCAAACAGGTTACAATCAGGAAAA  
TTGATTATTCCAATGGGAGGGTTTAAATAGAAGGAATAGATTAAAGAGGGAT  
TGGGAGCTCAAAGGGGAAAAATGGGGAGCATTGCGGTAACAGTATGAGAAA  
ATGTTGGTGAAGTAAATACACACAGACACTTGTTAAAAATGGCGAGGCA  
GATTTAATTTCGATTGCTGGAGAGAGGCTTTGGGTCAGAATTGAGCACAG  
CTCCACAGCAGTCAAAGGTGGGAGAGTTTCTAAATGCTAGAGTCAGCTA  
GGGAAGAGTGCTGGACATTGGTCAATGTCATCAGGCCATCCATGTTTGCT  
AAATTGTCACTTAACCCAGGTTAGTCTCCAGCCTCCAACAGAGACAGAG  
ACTGAGAGGGACTAACTTCCTTGTTGGTTACATCCTTGTTGGTTACATCA  
CCAAGGATGGATCCCAGGTCCTTGAGAAAGACATTCTTGAGTTGCAAAAT

TGGCAAAAGATCTGGAGAAGAATTCCATCTCAGAGGGGCAGAACAAAGAA  
TTTGTAATCACAAGTTTTCCAAAGTTAATGTTCTAAGAAAAAGAAGGTC  
AGAGATCTGTGGTCAGGAAGAAAGTTGTCTAAAGTTCAAGCTGAGG  
AGAATGTTGGGGCATCGTGGGCAAGAGGAGAAAAAAGGGGGAAAAATCA  
TCAAAATGTTTTCAAATGGCAGAGGGGACCCGGGCACTGGGAATCAAACCTAC  
AGAGGAAAGGACAGTGCTCAACCAACCAACTGAGCCACTCAGGCACCCTG  
CACACAATATTTTTTTTTTTTTTAAAGCTAGAGTAATTCCTTTTTTTTTTTTT  
TAAAGGACTTTGTGTATAGTAGGCTTGCTTAAGCATTTAGGTAGATAGTC  
ATATCATAGTGATGCCAAGAATATAAAACTGACTAGTTCTACCCATGTGC  
TTAAAAAGAACTGAGGGTTCTGGGTGTGTGGCTATGGCAGGCCGCCACTG  
GATGTCCTCATGCCCACACCACTGACCAAAGGTACAGCTAAGGAATCAG  
CAGAATTTCAACAGGGTAAGTTGGTTGACTTTTTGTTTATACAGTGCTAAC  
TAACCTTTTCGTGGTGGCTACAAAGCAGCAGAAAGAAAATCTTCTAAGACAA  
ATTTTTAAAAGAAAATAAATAATATTAATAATGTGAAGCTCATATGTCA  
AATAATTGGATAGATGCTAGCCCATCCATGCAGGATGATCCTTATACTTG  
TGAAAGTTAGTACAGAGTTGAAGGGACAGAACATTTTCTTTTCTTATCTT  
TTCTTTTTTTAAAGATTTTGTGTTGTGTACATGTGAGAGAGAGACAGAGC  
AAGCATGAGTGGGGGGCAACAGGAGAAGGAGAAGCAGGGAGCCCCATGTG  
GGGCTCCATCCCAGGACTCTGAGATCATGGCCTGAGCCAAAAGCAGACAC  
TTAACCCTGAGCCACCCAGCCACCCCTAACAGAATATTTTCTAGTCAAC  
ATTCACCCATACCCAAATGTATTGACCCAACTGGAGACACACATTTTTGT  
TAGACATTGTAATCCCTCCAAAAGAGGTAATATATGTGTTAATACATTCT  
TAAATGTTTGTGTTTATTTAAGACATGCATGGGGATCCCTGGGTGGCGCAG  
CGGTTTGGCGCCTGCCTTTGGCCCAGGGCGCGATCCTGGAGACCCGGGAT  
CGAATCCCACGTTGGGCTCCCAGTGCATGGAGCCTGCTTCTCCCTCTGCC  
TATGTCTCTGCCTCTCTCTCTCTCTCTCTGTGACTATCATAAATAAAT  
AAAAAAAAAAATTAATAAAAAAAAAAAGACATGCATGTTTATTCCCCATA  
CACTTTTGGTAACTTTAATTAAAGGCTCTTTGCTTCCCTAACTCAGAAAC  
TGAAATTAGCTGTTGCTCTTCTTTGCCCTGGTTTGTGAAATGCTAATAGC  
ATTCATTCTGTGGCTTGGTCTATAGCAAAAGAGGAAATGGAGATCTTGT  
TTATCAGCAAACTAATCACATCAACCCACTTTTATTATCATCTAACCTGCCA  
TGTTTCCCTACTTTCTCAAGAACAGTTGAAAGCCTGCTTGCATTCAATTCT  
TTTGTTCAACATTTATTAAGTGCTTACTGTGTAACAAACATTGCTAGATG  
ATCTTCTGCTTGAATTTTCTCAATAGTCCATTTTAATTTTTTATGTTAT  
GTGTGTTCCAGGCTCCAACAGTATCTATGGTTAATAAGCAAAGATGAGTA  
GACAGTTAAGGAAATTCAGAAAACAATTATTTTGAAGAAAAAGGAATGCA  
TGCTCGGCAATAGTTTAGGTTTTGAACCAAGCAATTTGGGTTCTTGGGT  
TCCAATTCATCTGATACAAACACAAACCCTATGTTTCAGGATATGGGTTG  
GCACGTACTTCACTGTTAATGTAAATGAGAAAAATGGGCTTTGGCGCATT  
TCTACATTTGTGTATTTCTACATCCCCAAGAGAAAAATGGCTTCTGGGAG  
TAGAATGTGCAGACTGTGGCTAATCAGCATCTATAGCCTTCTACATTTCA  
CTCCAGAGAGGAGCCCCACAATATGTTTGTGCTGATAATGTTTTCCTTGTTG  
AAATGTTTATATTTATGTTTATTTTACTATACACTCAAGTGCCTACTG  
GTTTTAAATCATCTATAATTAAACAACCTTTTCAAATGTAGAATTTTCATG  
TTCCTTACATCTTAATCCTTTCATCCTGTGTGGATAAGTAATATGTTTAA  
TAGTTAATTTTTATTGAGTGATATCCTAGGCCACACAATGTTCTAATCAC  
ACCTTACGTGAATCAACTCATTCATCTTTATGACACCTAACTACCTATG  
AGGTCAGTACTACATCTCAAGTAAGTAAGTAATTTGCCTAAGGCTTCACA  
ATAAATCTAAGTCCAAGGGATATGCATATTTGACCACCGCATGCCACTGT  
CTCTAATGGTTAATAAATAATTGACAGATTTCCATGCAATCAGGCTCAATT  
CGCTTTTGTGTACATCATCCTATTTATTACTCATGGGAATCCTAGATAGT  
AAAGGTGTTATTGCCTCTCTGTGAAAATGAGGATATTGAGGCCAAGACA  
GTTAAGTGAGGTACACAGCTAGTAAGAAGCGAAGGAGATATTTGAACTT  
GGTCAAACCTGCTTCCAGACTCTGTGACCTTGCTCAATCTGCTACACCAGA  
ATAAACAGCATAAGAAAACCTAATTGAATTTTTTCAGAAATTTTGTCTACA  
TCAGTAAGGCAAAAAAAAAAGAAAAGAAATATTCATCACTTCTACTTCGGTAT  
TAGAAATTAATAAATCAAATGTTTAGAATGAATAATTCTATATTCTCTAT  
ACAGGGGACCTCAATGTGGTAGTGGGTCAAGGTCATTTCAATTTAAGAAAC

CACCACAAAGAAATTAAAGCAAAGGGGAAAACAAAAAAGGGCATCGACTA  
TCTGCATAGGAGAGTGAGATCTCAACTATGCTTAACAAGGGAACAAGGCT  
GGTGTCTTCTCAACCAATGTCTCTTTTTCTTCCTAACCCAATATTCAACAC  
AGAGGAAAAGTTGAGAGTGAGATTAAGTGGTGCATTGGATTAAATCACCAA  
ATAAACCATAGGGCTTGGATTATAGGAAGAAGTCTGATATTCATATCCTA  
GGGGGAAAAGAAAAGACATCTAAGAAAAGATAAGAAGTTTCATGGGAAG  
AACTAATGAAGCAATCATTGTGCATGGATAATGAAGATGAAGAAATTCTA  
GACTCAGTACCTCACAAGCCCCAGGAAGGGTCATAGAATTTTGAGGCATT  
TGTCTCCATTCCCAGCCCATCCTCTTCGAAGCTTCCCTTGTGCCTTCCTG  
TCTGTAGGTTTTCTGATACCCAAGGGTGGTTCTGTTTTCTTTCTTTTTG  
GCATCTTGTAGATTTACGTTTCATCCATTGAGGCACATTGAGGTGACCTG  
CCAAATAACTCTTTTTGGCAAAAAGAGTGTGCTGGGTTATTACTCTTTGG  
TCCAAATGAGCCAGACTGACTGTCTACACTGTGGGAATAGGCCAGATAAT  
TACTTTAACCATATCTTTCCCTTTAGCTGTGTATACATGGTCCCTCGTCTT  
CTAGATAAACTTGGTTAAACCTCATAGTGAATAATTACTGGCAAGTAGCC  
ATGTGCCTAGAGTAATTTAATGTTTCATCTTTGGTTTCTACGGGGTGCTAG  
TGACAAAAGCAAGTTTTGTTTATAGTTATGTTAAAAGGATTTCTTTTCA  
CAATTTAAAAGAAAATCTCTAGAACATGAAGAAAAGAGCACTCAGCAGTG  
GCGGCGGGGGGATGCTGATTCCAAATTTTCTCGGGAATCACAGACACAG  
TGCAAGAAGAAGCTAGTGTAGGTTAGCTTTTAGAAGCAGAAAGCCAGTAG  
AAAAATATACCACATTGCTCCTGCCTTACAAGTCAAGCAAATTTTATTACA  
TTTAAAACATGCCTTCTGATGTAATGTCAGTATTTCTTTTGAATGCAAGG  
ACCAGAGTTGCATTTTATTACAGAAGCTAAACAACCTTGATTTTCCATGAA  
CTACTGTGTCTTGCAATTGCAGAGAGTGAGAGAGACAGAGAGAGAAAATG  
AAGACAAAAGGTAGAGATCCAAATTATAAATTGTGTTATGTATCGGTTTC  
AGAACCAGAAGGAAGGATTTGAACCTATCTCTCTTCTTTGCCTTGTGAAG  
ATGTGAACAATTACCATCTTAATCTTCTGTAAAGCCTGCTTAGGAGGCT  
TAAATTAGATCACATAAAAAATGACTTGGTAAGCTGTAGAACACTAAAAT  
GCTAAATGTTCTTCACTAAATGACAGGAAAGATGTTTTAAATTGGTTTAA  
GATTTGCATACATTTCAAGAACAAAACAAAAACACATCATGTTGGGGTA  
AAATGGATTAGGATGGCAAGAGAATGTCAGTGAAGAGACAGACAGTTCTG  
GGAATCATCAAATCGAGAAGAAAACCACTTATGCAAATTTACACTTTC  
CTCTCTTCAGCTGCCACAAAAGAAACCTAGGAATTCAGAGAGAAGGGAG  
AGGGGAGCAGGAGCAGGATGCAAATTTGTGATGTATATGAATACCTTCGT  
GCTTTGGGGTCCAGAATTTTCTTTTAGGAACTCTCCAAGACCATGATGA  
AACCGATTTCTTTTTAATTGAAATATATTTGACATATAACGTTGTATAAA  
TTTAAATCATACAACACGTTGATTGACACATTTATGTATTTATAATATGA  
TTGTAATTGTAGCCATAGTTGGCACCTCCATCATATCACCTAATTACCAT  
TTTCTTTTGTCTCAGAAATAATTAAGATCTAGTCTCTTAGCAAGTTTGAA  
GACATAATACAGTGTGTCTGTATTTTCTCTACTGTGCATTACATCTCCA  
TTACATCTCCAGTGGCAAATTTGTACCCTTAAACAACATCTCTCTTATCC  
CCCACCCACAGCCCTGGGAAGCACCATTTTACTCTCCTTTTTTATGAG  
TTTGTTTTTTTTAATATTCCACATATCAGTGATATCAAACAATATTTGTC  
TTTCTCTGACCTATCTCACTTAGCACAAATGTCCTTGAAGTCCATCCATGT  
TGTTACAACCTGGGAGGTTTTCTTCTTTCTCATGGCTGAGTAATACTCCA  
TTGTGTGTGTATAGTTATATATATATTATATATGTATATCCATATCTATCTA  
TTTATATGCTTACATGGTATCTATATATAGAAGTCATATATATATATTAT  
ACATGTATTTCCACATCTATCTGTCTATGCGTATGAATGGATAGAGATAG  
ATAGATAGATAGATAGATAGATAGATATAATATCTCCTTTATCCAT  
TCATCTGTTGATGGCACTTAGGTTGTTTTTCATATCTTGGTTACTATGAAT  
AATGTTTTTAATAATCATGGCAGTGCATATAGCTCTTTGATATCCTTTTCCT  
CAAAAGAAAAATCCTTAAGAGCAGGAACATTGATTATCTTCTTCACAGTT  
TGTTCTCAAACCTAGAACACTGCCAGCCACACTGGGACCTCAGTAAATA  
TTTTTTGAATGAATGAAGATATTTTAGGTAGCCAGGATAGCTCAGCAGAA  
ACATAAAAATAGGACAATGTGGTGAGTCCGAAAAAAGGCTGTGTGAAGAA  
GGAGAGTGGCAAAGAAAATTGAAAAGGTAGTTTAATGTGGGGTAGCATCT  
TGAATGCAACAGCAATATCTCAACAACATTCATATGAAGAGTCCTTAGTG  
CAATTCCATACCCATATGTTTAAATATGGTGTGACCCAATTTTAAGGGAA

ACCGTGTGCTGCCTAAACCACTGAGAGTGACATCAAGGTGGACTTCCTTT  
GGGACACTATGATTCTAAGGTGTTAAACACGTTTCTTCACGGCATGTCTT  
ATAGCTCCTTAAAGAATTCTGAGCTATGGAAATTATTGTGTTTAATATGG  
ATAATATGGGTATACAAATAGATATGTGGTATTTTAATGTAAAGCAGGAC  
CATAAATAGAACAACCTTTCTGGATAACTGCCTAGTTCATGTGGAGAATTT  
CAATCAGAAAGTCAGTAACGTACCTCATCTCAAGGAATACCAGCATATTC  
TCCTCCACATAAATTCAAGTATCCATAGCAACTTGAGTTGTGTTGACTTG  
ATAGAACAACCTAGCTTTTTCTGAAGAAGATTTTAGTATACCAGTTATTTGT  
ATCAGATTACTGTGCACCAAATTAAGTAACTCTATGTTTAGAGAAAATTG  
GAAACATAACACTGAATTTGAGAAAGAAAAGAGCTGTTACTTCCATGTGT  
ATTCTAATAGCAGGAAGGATTTCTCTACGTTCAACAAAAAACAAACAAA  
AAGAAGCATCTCTGCTGAAAAATTACCAGCTGTACCACAGAGTCACAACCT  
GAAATGATTCTTAACAAGAACAAACATTCCAACCTATCTGAAAAAGTTGGA  
AAAAGAAGCCAAAAGTACTTAGATTGTGTTTTAATCACAATGAGAACTGT  
TGTGTTTGGTAAGAAACATAGACAACCTGAAATCAATGGAGTGTAATTCT  
ACTGTGGAGAAGCTTTCAATACAGATATAATTTTCATATAAAGCACAGTTC  
CAAGAATATTACAATCCAGAAAAGGAGCTCATAAAAAAGTTTCTGAGGAT  
TTTTAACTACTATTGAAAGATCTAATATTACATTAGGAAGTAGTGACTC  
AAATTACCAAGCCATTGTAAACACAGCAGAGAAAATACCAAGAACTGGGAG  
TCTTCATTTTATAGAAGAAAAATCTACATTTTCTATTAAGAGACCTGTGAA  
TGGAGAAGAGATAATCAGAAGGAAAGAACTAAATAGAATTGCAAAAGCTA  
TGTTCAAAGTAGAAAGTGGGAAGGAGAAGGGAGTAAGTAGTCAAATGTTT  
CCAATTGCCAACAGTAAATTCTAACGGTGAAGCCTAATTAGCTGTCTCTA  
GTTTTTCAGAAGCTATGTTTGTCTCGAGATAAAGTTTTGTCAAAGAGATA  
AAAGAGATAAAGATAAGTCAAAGGAGCAAGGAAATTTTTTGTCTGTCTA  
GGCTTAAAATCTCTTTCACACTTACTCACTCCAGGAACAACCTCTATGCT  
CTGAAGTTCTCTATGTCTCCATTGTACTTCCTGCGAAATGTGTTCTTCTG  
GGGATGTGGGTGTGAGTGTAGGTGTGTGTGTTCTCATGTGCATGTGCACG  
CGTGCTGTGTGCAACATAGTTGTTAATGTTGCTTCTTCTCTCTTTCTTA  
TTTGGAGTCTCCCTTCTTTGTCTAGCTCATTCTATGCTGACAACCTCCAATG  
GAATGCCAGATTTTCTCTTTCTTTGCTTTGTTATTAATTATTAATTATTA  
TTATTAATATTATTAATTTTTTATGGAGGGATAAAGGGGTAGAAGTTTAG  
AATGCTCAAACCTTTTTCTGATGGTGCTGTCTGATTATTCCTACTCTGCT  
GCAAGTGATGATTTTCTGCTCACCTGGCAGGGGTAGAAGACAGTGTGTG  
ACAAAATGATCTTGAACTTTCCCATGGACCTTTTTTTTTTTTTTTTTTTC  
CCATGGATCTTTTAATACATTACAGGCTACACTGAAGGTATTCCAACCTCA  
GGATAGCTTATTACCTTTTTTTTTTTCATCCACCATCTTCTAATTGAGTAC  
AGTTGGGCATGACAAAACCTGAAGGACTCCATGAGTATACTCAGATAAATG  
TTTTTGTAACCCCTCAGTGAATACTTGGCCACCAGCTATAATAGCGACAT  
ACACATATCCTTCTCTATCACACAAATCCTTGCAAAACATTTGGATTCT  
ACTCCAAATATTAACAACAAATCTAAGAAAAAATACTTCTCTATAACAT  
TTTCTTTTGCTTGAAATAACAACTCTTTAGTAATGATGACATCTCTACA  
TAAACTTTTGTTAAAAAATATTAGTGTAATTACTTATTCATGAATTAAAG  
ATATCTGAATCAAAAAGAACAGTGTGGGGGGACAAAGTCGATTCCATCCT  
TTCAAGCCTACAGATTTGCACTGTTTTGTAGACTTGTTGTAATTCTCC  
ATGTAGCAACACAGATTTTGAATTTTCGTGGAAATTCCTCTTAAATCCTCA  
TAATAGTCTTGCTGTGAGTCTTAATTTTTTAATGATAGGCACTTTTATTTA  
CTTTTTTGTTGTTGTTGTTGACTATTTTCTTAAGTGTTTAGTGGGAAA  
TTGGAATAGGCTGCACAATGTTCTTTTAGCCTAGCCCCATTTTAGACTAA  
AGATAGCATTTGTTCAATTCTTAATATTCTTTTTTTGTTGTTTGTCTTT  
TCTTTTATCTTTCCATTGAATGCCAACCAGGATCAGAATGTTTTACCAA  
CATCTGTTTTATTATTTTATTAAACCCAAGGAACATAAGACTGTACACAT  
GCACATTGTTTATAGGTTTACATATAGCCCTCAGATGACTTCCTCACATT  
TATCTTGATGATTTGGCTCCAAATCCATCTTTTGAATTCATTTTTTTTT  
CCTTGCCTTCAAAGCCAAGCATGTTTCTAAGTGGTACTGGTTGGATGATC  
ACAACAGAATCTCAAACAAGCCAATGTTCTATGTTTTATGTTTCAGAACTA  
ACAAACACATCCTATGGCTTTTATGAGTGCCTTTACAACAAAGCCAAAAG  
TGTGTGAGCTCAATCACGACCATCACTTACTCTGAGGAATATGGAGAAAT

GAAGGAATTCTTCTGGAATTATGTAGAGAATTATGGAATCAGGATGTTCT  
TGCTCTACTTGATTTGTTGATTAATGAACAAAGAGGCAGGTATTTTGTT  
TTTCACTTTTAAATATCTCCATAATAAGCCTTTTATGGTGATGGTAGATTA  
TTTTATACTTTCAAGTAGAAGTAAAAAGTTTCTAAAGTTGTAGAGCTGTC  
TACGTTCTATTCCAAATCAGTGAAGTATATCTGTAAACAGACTCACCTCT  
CTGGCCTGTTATTTTAAATATGAGTTTCACACTCTATCCTCAAGCCTACT  
TTTTTCTTTTTGTAAATAGATATAGTATTTGGGGGAAAACACATATTGC  
TCAACTCCAATATATTTTTTAAATTAGGAAAAAACTACTTTCTTTGGAAT  
TTTTAATTACATAGTTTTATTTCCCAAACCACTAAGTTGTTATAGACATT  
TAACATTCTTTTTGTTAGGGGCACCTGGTGGCCAGTAGGTTGAGCATTT  
GACTCTTGTTTTTAACTCAGGTGGTGAAGTCTAGGTCATGATCTTAGGGTC  
ATGGAATCGAGTCCAACATTAGGCTTGAGCTCAGTACAGAGTCTGCTTCA  
GTTTCTCTCTCCCTCTCTCTCTGCTCTTTCTTTCTCTAAAATTAATAAA  
TAAATCTTTAAAAATGTTCCATAGGTTATAATTTTATTGGTTTTGGAAAT  
ATACAGACAATGCCGTGCTGGCCCAAATTTACTCTGAAAATATTTTTGC  
AAAATTAAGGATATTGCCTTTTAAAGGACAGCTTGGTGATTGCTACTAAGT  
CTCCCACCCATATTCAGTTTGGATTTCGGATGTTGCTTACATTTGTGGGGC  
GTCTGTTTATGTCTTTTATTCTCCGTAAACTAACTATGCTGTTGGACTA  
TCAAAATGTATATTTATTTACTTATATATCAAGGTATCATCATGATTTTT  
TGTTTTATAGAATAGGTAATGGCTCTGATTTATCTCTTTTGAGATCATTG  
AGACTTTGCAAGTAATGTAGTCTAAGTGAATTGTCTCTGTTACCTAGCT  
AGTGAGGAATAGAAGTGGTTAGGACAAGGCATCTTGAGTCCTCCTCAAGA  
GCTCAGCAGAGATAGCGTCATTTAATTTAAAGCTGATAGACTTATAAAGG  
AGTAAAGGAAAATAATCAGCTGTATTCATACCCCAAAGATCCTTATTCTT  
CTAGCTAGTATAGTTGGAGACCAGGGTTTCAGAGTCAGAAAGAACTCAAG  
TCAAAATATCATTTGACGAGCTTTGTGACTTGGGGCTAGCTATGCTTTATT  
TACCTCTTGTAATAATGGAGTAGCAACAGTCTAATTATTAAATAATGTAA  
TAACAGTAAAGTTCCCTGCCATATGGTAAACATGCAGTACGTGAGTGTGTG  
TGTGTGTATATATATATATACATATATATATATATGTATATATATAGTTA  
TAGAAAATATAGAGGGGGGAGGAGCAAGACGGCGGAAGAGCAGGGTCTCC  
AAATCACCTGTCTCCACCAAACCTACCTAGAAAACCTTCAAATTATCCTGA  
AAATCTATGAATTCGGCCTGAGATTTAAAGAGAGACCAGCTGGAATGCTA  
CAGTGAGAAGAGTTCGCGCTTCTATCAAGGTAGGAAGACGGGGAAAAAGA  
AGTAAAGAAACAAAGGCCTCCAAGGGGGAGGGGCCGGGAGGAGCCGGGCT  
GAGGCCGGGGCGAGTGTCCCCAGGACAGGAGAGCCCCGTCCCGGAGGAGC  
AGGAGCTGCACCGACCTTCCCGGGGGAAAGGGGCTCGCGGGGAGTTGGAG  
CAGGACCCAGGAGGGCGGGGATGCCCTCGGGTTCCTCGGGACAGTAACAG  
CAACTGCGCGCCAGGAGAGTGCGCCGAGCTCCCTAAGGGCTGCAGCGCG  
CGGCGGGACCCGAGCAGCTCGGAGGGGCTCGGGGGCGGCTCCGCGGAGG  
GGGCTCCGCGGAGGGGGCTGCGCGGTTCCAGGAGCAGCTCGGAGGGGCTC  
GGGCGGCGGCTCCGCGGAGGGGGTTGCGCGGCCCGGAGCGCAATCCAA  
CAGCGCAGGCCCCGAGCACAGGGCGCCGGGACACAGCCAGGATCCGGC  
CTCCCCCGGACAGGCAGAGACCGGGAGGGGCCAGGACAGCAAGGACGCT  
CCTGCCCCAGCTGAGCACATCAGCGGCCCGCCCGGAGCCTCCAGGCCCT  
GCAGACGGAGAGCTCTGGGGTTACTGCGGGGGCTGACTCCAGGGCTCCAG  
AGCTGGCCCCGCCACTGGGGCTGTTCTCCTGCGGCCCTCACGGGTAAACA  
ACCCCCACTGAGCCCTGCACCAGGCAGGGGCACAGCAGCTCCCCAACTG  
CTAACACCTGAAAATCAGCACAGGCCCCCTCCCCAGAAAGATCAGCTA  
GACAACTTCCAGGAGAAGCCAAGGGACTTAAAGAACACAGAATCAGAAGA  
TACTCCCCGGTGTTCTTTTTTTTTTTGTTTGTGTTGTTTGTGTTTGTGTTTGT  
TTTGTGTTTGTGTTTGTGTTTGTGTTTGTGTTTGTGTTTGTGTTTGTGTTTGT  
CTCCTTTCTTTTTCTTTCTTTCTTTCTTTCTTTCTTTCTTTCTTTCTTTCTTTCT  
TTTCTTTCTTTCTTTCTTTCTTTCTTTCTTTCTTTCTTTCTTTCTTTCTTTCTTTCT  
TCTCTTTTTCTTTCTTTTCCCAATAACAATTGCTTTTGGCCACTCTGCACT  
GAGCAAAATGACTAGAAGGAAAACCTCACCTCAAAAGAAAGAATCAGAAA  
CAGTCCTCTCTCCACAGAGTTACAAAATCTGGATTACAATTCAATGTCA  
GAAAGCCAATTGAGAAGCACTATTATACAGCTACTGGTGGCTCTAGAAAA  
AAGTATAAAGGACTCAAGAGACTTCATGACTGCAGAAATTTAGAGCTAATC

AGGCAGAAATTAAAAATCAATTGAATGAGATGCAATCCAAACTAGAAAGTC  
CTAACGACGAGGGTTAACGAGGTGGAAGAACGAGTGAGTGACGTAGAAGA  
CAAGTTGATAGCAAAGAGGGAACTGAGGAAAAAGAGACAAACAATTAA  
AAGACCATGAAGATAGATTAAGGGAAATAAACGACAGCCTGAGGAAGAAA  
AACCTACGTTTTAATTGGGGTTCCCGAGGGCGCCGAAAGGGACAGAGGGCC  
AGAATATGTATTTGAACAAATTCTAGCTGAAAACCTTCTCTAATCTGGGAA  
GGGAAACAGGCATTTCAGATCCAGGAAATAGAGAGATCCCCCCTAAAATC  
AATAAAAACCGTTCAACACCTCGGCATTTAATTGTGAAGCTTGCAAATTC  
CAAAGATAAGGAGAAGATCCTTAAAGCAGCAAGAGACAAGAAATCCCTGA  
CTTTTATGGGGAGGAGTATTAGGGTAACAGCAGACCTCTCCACAGAGACC  
TGGCAGGCCAGAAAGGGCTGGCAGGATATATTCAGGGTCCTAAATGAGAA  
GAACATGCAACCAAGAATACTTTATCCAGCAAGGCTCTCATTCAAATGG  
AAGGAGAGATAAAGAGCTTCCAAGACAGGCAGCAACTAACAGAATATGTG  
ACCTCCAAACCAGCTCTGCAAGAAAATTTAAGGGGGACTCTTAAAATTCC  
CCTTTAAGAAGAAGTTTCAGTGGAACGGTCCACAAAAACAAAGACTGAATA  
GATATCATGATGACACTAAACTCATATCTCTCAATAGTAACTGAATGTGA  
ACGGGCTTAATGACCCCATCAAAAGGCGCAGGGTTTCAGACTGGATAAAA  
AAGCAGGACCCATCTATTTGCTGTCTACAAGAGACTCATTTTAGACAGAA  
GGACACCTACAGCCTGAAAAATAAAGGTTGGAGAACCATTTACCATTCTGA  
ATGGTCCCTCAAAAGAAAGCAGGGGTAGCCATCCTTATATCAGATAAACTA  
AAATTTACCCCAAAGACTGTAGTGAGAGATGAAGAGGGGACACTATATCAT  
ACTTAAAGGATCTATTCAACAAGAGGACTTAACAATCCTCAATATATATG  
CTCCGAATGTGGGAGCTGCCAAATATATAAATCAATTATTAACCAAAGTG  
AAGAAATACTTAGATAATAATACACTTATACTTGGTGACTTCAATCTAGC  
TCTTTCTATACTCGATAGGTCTTCTAAGCACAAACATCTCCAAAGAAACGA  
GAGCTTTAAATGATACACTGGACCAGGTGGATTTACAGATATCTACAGA  
ACTTTACATCCAACTCAACTGAATACACATTCTTCTCAAGCGCACATGG  
AACTTTCTCCAGAATAGACCACATATTGGGACACAAATCGGGTCTGAACC  
GATACCAAAGATTGGGATTGTCCCCTGCATATTCTCGGACCATAATGCC  
TTGAAATTAGAACTAAATCACAACAAGAAGTTTGGAAGGACCTCAAACAC  
GTGGAGGTTAAGGACCATCTTGCTAAAAGATAATAGGGTCAACCAGGAAA  
TTAAGGAAGAATTAAAAAGATTTCATGGAACTAATGAGAATGAAGATACA  
ACCGTTCAAAATCTTTGGGATGCAGCAAAAGCAGTCCTAAGGGGGAAATA  
CATCGCAATACAAGCATCCATTCAAAAACCTGGAAGAACTCAAATACAAA  
AGCTAACCTTACACATAAAGGAGCTAGAGAAAAACAGCAAATAGATCCT  
ACACCCAAGAGAAGAAGGGAGTTAATAAAGATTTCGAGCAGAACTCAACGA  
AATCGAGACCAGAAGAACTGTGGAACAGATCAACAGAACCAGGAGTTGGT  
TCTTTGAAAGAATTAATAAGATAGATAAACCATTAGCCAGCCTTATTAAA  
AAGAAGAGAGAGAAGACTCAAATTAATAAAATCATGAATGAGAAAGGAGA  
GATCACTACCAACACCAAGGAAATACAAACGATTTTAAAAACATATTATG  
AACAGCTATACGCCAATAAATTAGGCAATCTAGAAGAAATGGACGCATTC  
CTGGAAAGCCACAACTACCAAACTGGAACAGGAAGAAATAGAAAACCG  
GAACAGGCCAATAACCAGGGAGGAAATTGAAGCAGTCATCAAAAACCTCC  
CAAGACACAAGAGTCCAGGGCCAGATGGCTTCCCAGGGGAATTTTATCAA  
ACGTTTAAAGAAGAAACCATACCTATTCTCTTAAAGCTGTTTGGAAAGAT  
AGAAAGAGATGGAGTACTTCCAAATTCGTTCTATGAGGCCAGCATCACCT  
TAATTCCAAAACAGAGAAAGACCCACCAAAAAGGAGAATTACAGACCA  
ATATCCCTGATGAACATGGATGCAAAAATTCTCAACAAGATACTGGCCAA  
TAGGATCCAACAGTACATTAAGAAAATTATCCACCATGACCAAGTAGGAT  
TTATCCCTGGGACACAAGGCTGGTTCAACACCCGTAAACAATCAATGTG  
ACTCATCATATCAGCAAGAGAAAAACCAAGAACCATATGATCCTCTCATT  
AGATGCAGAGAAAGCATTTGACAAAATACAGCATCCATTCTGATCAAAA  
CTCTTCAGAGTGTAGGGATAGAGGGAACATTCTCGACATCTTAAAAGCC  
ATCTATGAAAAGCCACAGCAAATATCATTCTCAATGGGGAAGCACTAGG  
AGCCTTTCCCCTAAGATCAGGAACAAGACAGGGATGTCCACTCTCACCAC  
TGCTGTTCAACATAGTACTGGAAGTCCTAGCCTCAGCAATCAGACAACAA  
AAAGACATTAAAGGCATTCAAATTTGGCAAAGAAGAAGTCAAACCTCTCCCT  
CTTCGCCGATGACATGATACTCTACATAGAAAACCCAAAAGTCTCCACCC

CAAGATTGCTAGAACTCATACAGCAATTCGGTAGCATGGCAGGATACAAA  
ATCAATGCCCAGAAGTCAGTGGCATTCTCTATACACTAACAATGAGACTGA  
AGAAAAGAGAAATTAAGGAGTCAATCCCATTCTACAATTGCACCGAAAAGCA  
TAAGATACCTAGGAATAAACCTCACCAAAGATGTAAAGGATCTATACCCT  
CAAACTATAGAACACTTCTGAAAGAAATTGAGGAAGACACAAAGAGATG  
GAAAAATATTCCATGCTCATGGATTGGCAGAATTAATATTGTGAAAATGT  
CAATGTTACCCAGGGCAATATACACGTTTAATGCAATCCCTATCAAAATA  
CCATGGACTTTCTTCAGAGAGTTAGAACAAATTATTTTAAGATTTGTGTG  
GAATCAGAAAAGACCCCGAATAGCCAGGGGAATTTTAAAAAGAAAACCA  
TATCTGGGGGCATCACAATGCCAGATTTTCAGGTTGTACTACAAAGCTGTG  
GTCATCAAGACAGTGTGGTACTGGCACAAAACAGACACATAGATCAGTG  
GAACAGAATAGAGAATCCAGAAGTGGACCCTGAACTTTATGGGCAACTAA  
TATTCGATAAAGGAGGAAAAGACTATCCATTGGAAGAAAAGACAGTCTCTTC  
AATAAATGGTGTTGGGAAAAATTGGACATCCACATGCAGAAGAATGAACT  
AGACCACTCTCTTTACCATACACAAAGATAAACTCAAAATGGATGAAAG  
ATCTAAATGTGAGACAAGATTCCATCAAAATCCTAGAGAAGAACACAGGC  
AACACCCTTTTTGAACTCGGCCATAGTAACTTCTTGCAAGATACATCCAC  
GAAGGCCAAAAGAAACAAAAGCAAAAATGAACTATTGGGACTTCATCAAGA  
TAAGAAGCTTTTGCACAGCAAAGGATACAGTCAACAAAACCTCAAAGACAA  
CCTACAGAATGGGAGAAGATATTTGCAAATGACATATCAGATAAAGGGCT  
AGTTTCCAAGATCTATAAAGAACTTATTAACTCAACACCAAAGAAACAA  
ACAATCCAATCATGAAATGGGCAAAAGACATGAAGAGAAATCTCACAGAG  
GAAGACATAGACATGGCCAACATGCATATGAGAAAATGTTCTGCATCACT  
TGCCATCAGGGAAATACAAATCAAACTACAATGAGATACCACCTCACAC  
CAGTGAGAAATGGGAAAAATTAACAAGGCAGGAAACAACAAATGTTGGAGA  
GGATGCGGAGAAAAGGGAACCTCTTACACTGTTGGTGGGAATGTGAACT  
GGTGCAGCCACTCTGGAACCTGTGTGGAGGTTCTCAAACAGTTAAAAA  
TAGACCTGCCCTACGACCCAGCAATTGCACTGTTGGGGATTTACCCCAA  
GATACAAATGCAATGAAACGCCGGGACACCTGCACCCCGATGTTTATAGC  
AGCAATGGCCACGATAGCCAAACTGTGGAAGAGCCTCGGTGTCCAACGAA  
AGATGAATGGATAAAGAAGATGTGGTTTATGTATACAATGGAATATTACT  
CAGCTATTAGAAATGACAAATACCCACCATTGCTTCAACGTGGATGGAA  
CTGGAGGGTATTATGCTGAGTGAAGTAAGTCAGTCGGAGAAGGACAAACA  
TTATATGTTCTCATTCAATTTGGGGAATATAAATAATAGTGAAAGGGAATA  
TAAGGGAAGGGAGAAGAAATGTGTGGGAAATATCAGAAAGGGAGACAGAA  
CGTAAAGACTGCTAACTCTGGGAAACGAACTAGGGGTGGTAGAAGGGGAG  
GAGGGCGGGGGTGGGAGTGAATGGGTGACGGGCACTGGGTGTTATTCTG  
TATGTTAGTAAATTGAACACCAATAAAAAATAAATTAAAAA  
GAAAGCCAGTGGCAGAGTAGGAGTAAAAAAGAAAAAGTAATTTTGT  
AGAAATAATCACAAAACCTATTTTAGCAGAAAGCATTAAGAGAACACAT  
AGATTACTCTTCAGGTGTAGTTAAGGAAAGCTTGAAATGATTTTACAG  
ACTATAAGAAATCCCTGAACATTAAATATGTATGAGGCACTACGGGAATA  
AAATGGTACAGTGTATTTCTCTCAAAAAAAAAAAAAAAAAAGAAAAG  
AAAATATAAAATTATGATGTATTTATTCTTCTCCAACCAAAATTCTA  
AGGTTATCATTCTAATGCTATGCAACATTGTTTATATTGGGGCTAAAAA  
GTCTGAAGTCTATTACGAATTGTCACAGAACAACAAATGAATACGGCAA  
TCCTCAGTTCCTACTGAGGGGTACTTAGCTTTTCAGGAGATATTTGGCA  
ATGTCTGGAGACATTTTTGGTTATCACAAGGGAAAGGGAGCGCAGGTGC  
CACTGGCATCAAGTGGACAGAATCCATGGATATTGCTAAATATTCTACAA  
TGCACAAGACAGACCTCACAACAATAAATAATATCGCCTAAAATAACAAG  
ATCGAGACAGAGAAATCTTGAAAACATTCTCAAGCTCTTCCCCTCAAATG  
ACCTGATGGCAAAAATGGATTCCCATTTCCATAAGATCAATTCAAATGAA  
ATTATAGCTTGGGTTTAATTATATTCAATTCAACTTATCACAACGAACTT  
TTATTTTCAGAAAAACAGTTTCTGATATGCTTTTAAGTTTTTCATATGTT  
TTAGATCACATTCATTAAATATAATTACAATATATTACATATAGAAATTT  
AGGGCACAATTATAAATGCCATGATTCAAGAAATACTGTTTTAATTTAGC  
TTGTAGAACTGTGAGCTCACTTAGTTCTTTTTGAACATTTTGGCTTGGG  
AATATATATATATATATGTGTGTGTGTGTGTGTGTGTGTGTGTGTATA

CATATACTTACATACATACATATATTCTTAAATACAAATACATATATATA  
TATATAATATATATATATAACACACACACATATATATCCTCAGCTTTC  
CAATGCAACGGATAACAAATACAAAGAATGAAAATACCTAATTGAAGATC  
CACATAATTCTCCTAAGTAGTCTATCATCTGGTTGAAATATTTACATTT  
AAAAATGTTTTCTGCTTAACAGCAAGCAAACAAATGCCAAGATATTCAGAT  
TACTGTGCTCACATTTTTCTTCACATTCCACCATTGTAGCCTTGAAAACC  
TAGAGACTGAAGAACAATTCTGTCTAATTTCTTGACTAGATTGTAAAGA  
TAATTTTCTAACCAGGCTAAGATGTACTCTGCTGAGTTAAAAAGACTATA  
TAGAACCTAGGTGTCCCTCAAAAAGAAAAGGCTATATAGAGGTAAGTGGG  
ATCCCGTAAAAGGATTACGTTGCAATTTTCTTCTCCTTATTTCTCTCTC  
TTCATTTCTTAAAGTTTCTCCTTAGTTGAGACAAAAGGGCAATATCTCTG  
GACTTCCAGAGTGAAGATCTTGACCGATAGCCCACCAACTATCTCATGAT  
TAACTCTGATCTTGACCACGTTTTTGTGTTTTGTTTTGCTTTGTTTTTTTT  
TTTTACCTTAGTCTCATTTTTTAAAATGAGGATAATACCTGCAACACAAAG  
GTTTTTCATATATATTTATATTTATATTTATATTTATATGTTTGAAAAACA  
TATATATTTGAAATATTAACCAAGGCATACAGATACATTTTTTTTTTAAAA  
TCTCCAAATTTACCCATTTAAAATCACTTGACTGAAGGATTTTTTTTAAAT  
TTTTATTATTTTTTAAAGATTGTATTTATCCATGAGAGACAGAAAGAGAGG  
CAGAGAGGCAGAGGTAGAAGCAGGCTCCCTGAGGAGACCCTGATATGGGA  
CTTGGTCTTAGGACCCCGGGATCATGATCTAAGCCAAAGGCAGACACTCA  
ACCACTGAGCAACCCAGGTGTCCCATTTTCACTTTTTTTAAAGATTTAT  
TTATTTTATTTTAGAGACAGTGGATGAGCAGAGGGAGAGAGGGAATCCCA  
AGCAGTCTCCATGCTCAGCAGGAGTCCAAGGAGGGGCTCTATCCCACCAC  
CCCGAGATGACAACGCCAGCCTAGACCACGAGTCTGAGGCTTAGTCAACT  
GCACCACCCAGGGGCCCCCTATTAATTCTTTTATCTATTCATTCAACAAAT  
ATTTTGTAGCACAGTGTGGCTACTAGAAATACAAAGACAACCAATAGCA  
TTTAGTCTCTGCTCTCAAGAAGCCTGAGGTCTACAAGGGGAACAGATGC  
CATTCACATGCTAGTACAACTACACACATGATTGAAAATGGGCTGTTTT  
GGTGAAGTACATGGAGCACAGGTAAGCGATGTCAGGTATAAAAGTTTCTG  
TGGGAATGTGTGGAAGTGGGTGCTGCAGATGGAATCAGGGTTCAGAGGTGG  
GGATAGTGCATCACAGATAGGTAACAGCACTCATGGCTCCTGCAAGTGGA  
GCATGTGGCATGAACAAAGCTGGAACTGAATGAAGGTCATGGGACCAGA  
GGGTAGAGGGAGAAGGAGCACATAGGAAGAGGTAATCATTTCCACAGTAC  
ATAACTGTTTGGTTTCCACATTCTAAATATGCCACTTCATGTTGTTCTCTC  
AAAGATTCCCTGTGAGGTAGATACCATCCATAATGCAGTTTTATAGATGAG  
GCTATCCAGGTTTCAAGAAATTAACCTTACACAGGGTCTACTCTCAGCTAG  
TAACTGGCAGAGTAGGGGGGGGTTCCACTGCTGGAGCTGAGGGTTTAAAC  
CTCTCAACAGTGTAGAGGTAAAGAGTTTAAATATGGATCAGACCACCCAGG  
GATCTGTTTTTTTTTTTTTTTTCTTTATTCTAAGAGCAATACAAAGACATT  
GAAGGGTTTTAACTGGGAATTGGTAAGACCTGGTTTAGGTTTTAAATCAA  
AATAATAAGTCTGCCTGTATTGTGGAAGCCAATGACTGGATTAATTGGT  
GCAACCATGAAACAAAGACTAGTTAAAAAAGACTAGTTAACTG  
TGGAAGAAGTGGCACTGTCCAGTAGCAATGGAAAAACATGGATATGCGT  
GTCGTGAATTCATCTGCAAACTCAATATTTACCTTCTGTGAATGCCTACA  
GCAGAGCATCTAACTCATATACCAATTAGTTAAACTCCTTTGGTTAGTA  
ATTAATTGATTTGTAGAGCTGAATTGAATGCTAAAATGATATATCCAGCA  
GTTAATTTATCAATTTTAGATTTAACCATAAAGATTGGGCTCAATCCCTT  
TTTTCTGGATTTCTATCCAATAAGGTTTCTGATGTCTACAATGGTCTC  
ACTTGAATATCCATACAAATTTTTTACACATTTTCATATGTAGTGTA  
TTACAAATGAATAAACAGATAAAAAATGTATTTCTTTTAAATATTA  
AACTAACTGAGCTCTAGTATTCAAAATTCCAACCTGAAAAACAGAGATA  
AATATTGTTTATTCTATTGAACAGATTAGGAAACATAAACTCACACAAA  
AACAAAAACAAAAACAAAAACAAAAACAAAAACAGATTTCCTTAGAGCT  
ATTCTCCTGGAAATGATGGGGCCAGTATTCAAGTTCAGGCATTTGTCACC  
AATTAATGGTACCAGGCTACTGCTCCTTAAGGAATGGGAGGCTCACGATT  
AAACCACTCACTCACAACCAATAAGAAGAAAACATTTTTTAAAAAATGTTG  
TACTTGTTAATGATTATAATCCATGAATGTATTATCATTCTTCTATCAGA  
CAGCAGCCTTGGTTTTGTAGTCCTATCATTAGAAAATCCTCATATGAAGC

ACAAAATGGACTTAAGATTAAAGACGGTTCTGAAAGAAAAAATATTAC  
AATTCTAGCTATCTTGGAGCAAAGAATCTGTGGGTGTGCATTCGCGTGTG  
CATGCTTGCCTGAATAATCATCTTCCCTATGTACTGTATCTGTAAATGTA  
GCCAGGGATGCTAACATAATGCATCCTCAATACACCTCAAGGTGACTCTA  
AGAAAAAATACCTGTCTATCAATATTTGAGCTAGTAGTTTAAAAAGTAAA  
ATAAAATCAGAACAAAATCTTTCAAGTCTTTAAAAATTTTGCTCTTGAAGG  
AAATGCCTAGAAAAACCATCTTTGGCATTTTGCATACTCTTCTTGTTTCTCAG  
GAAACCACTTAAAAATGTGTAAGATTTATTCTATATAGTTGAAACAAAATA  
CTTTTTGTTTTCTATCAGATTTCTTGGAAAGATATTTGTTTTCAAGATGTTT  
GTCACCACTTGTAAAGTAAACATAAAGGATTTTCTTACTGGAGACATTTT  
GTGCTGTGGTTCCCAATCTAGGTTTTCCGAGATCCCGGATTTGGGAAGA  
ATCTTTCTTTTTTAAAAAGTTTTATTAAATGTTAACTCTTGTCAGGCCTCT  
TAGAAGACTACAGAAACAGATTGCAAATTTCTTACTAGACTGGCTCTGAAGTT  
TGGGGGCTGAGAATTTCTCTCACAGAACATTTCTTACTAATTTAAAAATAT  
TTCTTCTCAAGAAAGAAGGAAAAAATAACATCCTTTCTGTTGTGAA  
AAGGTTTTCAGATTCCAAAATCTAATATTTCTACATTGGTAAAAATATGCTA  
TTAATTAGAGTTAAGAAAAAATAATAAATAAATACCTCACCTTTCATCT  
GAGACTTCTAAGAGCATTATACAGCAGGGAAGTTTACAGACTCACACAG  
GGAGACAGAACCTATAGTCAAAGCCTGAAAGAAAATTGAAAATGAAATGG  
TTTTTAAAAATAGGCAATGATTGCAAATCTAGATATCCATGGTAGATTGTT  
TGCAAAAGTGGCCAAGATCATGGTTCTCCCTATGTTTCGCACCATGGGTTT  
GTTCCCTCTCACAAATGACTCTGAATTTAGACAAAAGGAACAATAATAAAT  
TGATGTACTTGAGACATGAAAAGCGTTTGTACCTTCAGATCCAGGAAGCC  
TATGACCACTATCATGTGACAGAGTCTTGGCCATCCTGCTAGAAGATGAG  
AGATATGTGACCTAGTCACTCATCACATCACTTGGCCTTGAGCTAAGCAT  
CTGAGTATTAGGGAGGGCCTCCCCGAGCAGCCCCAGGCAAACCAGCCCAG  
ACTCAAAGAACCCTCAGGAGATCCTCAGATTTAAGAAAATTCGATATGC  
ATAGGTGTCTGCTTGTACTAATTTAATCAATGACCAAAAACAAAGGATCAC  
ATATAAGGGCCAGTATTTATGGAGATTTTAAATCTTCTGGTAGTTCTTAT  
ATCATTCAGGGTTCCAAAAGGAATGGGCAGGTGCACACAATGGGGATTTT  
CAGGGGAATTTTAAATGAAAGAGTTATTTCCAGAAGTGTGGGTAGGGATAA  
GTTAACTCTTGAGTGATGCTGAGACTTCCAGAACTAGCGACATTGGGTTG  
GTTTACAACCTCTGGGGGTCTCAAGGACCATAGGGTAAAGGGGTTTCAGCA  
GGATCTAGTGAAAATAGTGGGAAGGAGAGGTGAAAGAGAAGCCAGCCAAC  
AAAAACCAGCGTTTAGGGAAACAGAGTCATGGGTGCTGATGTACAGATGC  
AGCAGGGAAGAAATGCTCAGGTAATTTCTAGACCCACCAAATCAGAAGCCA  
GAAGGCGAGGAGGTGCTGGGGATTTCATCACCTAGGGCACAAGCCTCCCAG  
GCCATAGGACAGGGCAGAGAAACAGGGTGCATGTGTGTGCAGGGACAGTG  
GAGGGGTGGGGATACAGTTTTACCCAAGGGCAATGCACGCTACTGCTCTC  
TTCATTGCTCAGCCTCCAATAAGCAACAAATTCAGGGCAGGGTACAATA  
AAAAGTGTACTGAGGCCTGAAATTTGGGAAATAGTCTGGTGTGATCCTGG  
AATTCGATTAAATGGGATTTGAATTTCTGTTTCTGCCACGGATAGCTGTGT  
AACAGGCAGGTAGCCTGCCCTGTGTCTCAGTTTTACCATTGTGTGAATGG  
AACAACAATAAATTTCTGAAAGAGGTTTCGCAAGGACCCCTCACATCTAAAA  
CCTGGTTCCTTCCATGCTAGAACTATCCCTGCCGCTCACAACCTACCCTTT  
AAAAATGTAACATTGCATTTCAAAATATTTATAACAGCCTGAAAGAAAAT  
CCCCAGATCTCGCGCAGTAAGCTACCAGCTTCCAGAACGTTCACTTTTCT  
TTTTTTCAATATTTCAAAGTCATAAATAAATCCTACTTTTATGTGCACTG  
TGGCCTATATTGTTTTCAGAGATTGGTTCCCTAATCCTTATTTTTCTTCTCCT  
CCAAGTTCTCACATTGCCACACACCAAGACACACGCTTCTTTTCTTCTAC  
GCCCTAAGTATTAGTTTCTTATCAAACGCAGTTCGGCACCAAATCACAAT  
TTCCAGGCAAAATGAGATCAAGACCAGAGACTTTCCAAAAATCATTGGCT  
TGTATACTTACAGAAATACCAACCCGCATTTACCATTAAATCAAATCCAT  
TTGCATGCCACTAATATTCTCTAGATTCTTATTGTAAGTGGTCTTAATTC  
TGTCTTTGGGATATTGTGAATTCTCTAAGATCCCGTTGGCCAACAGCGCC  
TGTGCCGAATCTGAAAATGTGCATGTTTGATGTAGCTTGTGATGTGAGGA  
AACAACTTACAGCCTTAAAAATCCTTCATTAAATTAAATATTATCTTAAG  
AAATCCTAATTAACCTTAATCTTCACCTCCATCTTCATTTTCGTCTCTGTG

ACTTCATTCGAGCCTGGCCTGCCTATGACCTGGAGCACATTGGCTTCACA  
TTAGATAAAATGTTACTAAAGCCTCCCAAATAACCTTTTAATTACCTCT  
TAAACTCTATAAAGAGAATTGGCTTTTTTAGTGTGACATCATCCCAGGATG  
GTTTTAGCACACTAATTTTATTCCTTGCTGCGCTAATTTAACTTGGTTT  
ACAGAGATAACCAACCAGATGTTGAAATATTTAAATAGGTTATCTCTGTG  
CATTTCTGCTCCTACAAAGAGGTTGCAGCCAAAGGATACCTCAACGTTTC  
TCCGCACAGTTTTGCATTTATTGATTACACATTTATTTTGTAGTGTCTTG  
CAAAAAGCACCACAAATAACGGTCTGGTTGGCATAATAACAAAGATTCTG  
AGGGAGCAAAAGATACTTTAGAGACACAATGACAAGTGATCGTTTTTAAA  
GTCATCGAAGTAGGGGCACCTGGGAGGCTCCGTGATTAAGCATCTGCGTT  
CGGCTCAGTTTGTGACCCAGGGCCCTGGGCTCGAGTCTGCATTGGGCT  
CCCTACAAGGAGCCTGCTTCTCCCTCTGCCTGTGTTTTCTGCCTCTCTCTG  
TGTCTCTCATGAATAAAATAAAATAAAATCTTAAAAGAAAAAAAATAAAAC  
CCAAATGAAAGTAGGTGGTCACTGATAAGTATCATGACTACCGGATGGTG  
CAAATTAGTGTACCCCATCTTTGCTGTTATAACCGTATCAGATTTTTAAAA  
AATGAGTACACACCACACATACCTGATGATATTTATTTATTCATAATTTA  
TGTGCATATATTTCTATATTACTCCATTAATACGAACATATAAACGGAAA  
TAAAAAGACAAATACCACATGTATTTTTTTTTTTTTTTTAGATTCCACTTG  
TAAGTGAAAGCAAATGGTTTCTTCCCTCTCTGACTTATTTCACTTGGCAT  
AATGTCTCAGGGCACATCCATGTTGTCACAAGTGACAAGATTTCTTCTT  
TTTTAGGGCTGCATTATACTCCATTACGTGTATATGTGTGTGTGTATCCC  
ATTTTCTCTCTGCATTTTTCCCAGGAAGTACACAGTGCTAAGATGCTTC  
AAGCTTACATCACATTACACACACTGTGGGTGTATGCACCGCATCTCCT  
TATCTTCTTCCCACCCCACTCTACCCCTTACCAGCCAGTGTCAGACTCT  
CAGTACCATTACAGGAGGATTAATCCCATCACCCAACTGTTCTTGGTGCT  
TTGCTTACATCTCCTGGTGAGAAATCCTATTACCTTTTCCAGATTAAAT  
CTCTACTGTTCACTTTTATCCAAGACATAGATTTTTCAAAGTATCTCTG  
ATTTTTTAGTGAAAGGAGGCCAGGTGATTACTTGATGTAGATCACCGATTT  
TTTTTTTCAGCTAGTCTCAATTATTTGGCTCTGCATAATTTTCTAGATAA  
TTCCCATTACTTTTGTCTAACCCCTCTAATCCAAGTGTATGGTAATTCTTT  
GGTAGAAAATGAATTCCTTGAGTTTAGGAGCTTATTCATATCTGATCTGT  
GATATCAGAACATAAAATTTATATGCAGGTATAAGTTTACAGAACTGTT  
TACAATAATAGATAATAAAATGTATTTATCTGTGATCATTCTGATTGT  
TATTTCAAACCTCTCATTTGGCTCTCTGATAGAATATGAATCTCATCAATA  
AAAAATTAAGTTAGGTTTTTCTCTCTGAACTTGCAATTAAGTTCCAGAAGA  
GAGAAGGTTTGGTAATAATCAATCTCCATCAATTGGTGCACAATATACAT  
ACCAAATGGCCCCCACTATTTTTGGCCGTATGTATGGATGCTTGTCTTC  
AATACAGTCTGCTGAGAACCTACTATTTGCCTAGTTCTGAGCTAATTAGT  
GGGTAGATTTTTAATAAAATGAATGAAGGCTTTCATAACTTCAGTTATGGT  
TTCAAGTCAAGTCTCTCCCTCCCTGAACTGTTCAAACAAGTAAGTGATA  
AATGGTATCTGAATATTGGTTTACGTAGATTTGTTCTTCAGGCTTCTGGA  
ATAATGATCCCATGGTGTACTTTAGGCTTTGTAGCCTGAGCACAAGATAT  
GTTCTTTTTATTATACTCAGGGTTTTGTGGTAACTTTTTTTTTCTTTATT  
CTTTTTTCTTCTGTGAGAGTATTTATCTTACCACCATAAGCAATCAAA  
GACTATTCTGAGTTTAAGATAGGAATGGTGTTTAGTAATGGTCATGCCTC  
CGGAGTCAGACCCACTAAAGCTGACTCTGCACTTGACCAAGAGTATGATC  
TGGGATAAGTTACAAAAATCCCTTCTTCTTCTTCTTCTCATCTTAATAT  
GGCAATAATAAATAGTGCCATCTCTCTAGATTATTGTGAGGACTGTGCCC  
AGCACAAAATAGTCAGTAATAATACCACTTCTTTTCATGAACATTAAATC  
CAATAGGAGAAAAATAGATGCACACAGATTGCTTATGCATTTTCTTGCA  
TTATCTCCATGGTGCCAGGTCCATTTCTGTAAGGTAAGCCATCACTCTCA  
GGTTTTCAATGAAAGATTATTCACTCTGGGACCTCAGTTCCTGCATTATT  
CATGCCATTCTGCATGCAGCTAGATTTATGTGTGAGGAAAAACATACAAA  
TGGAATCCGATTTACTTGACAAGTTCCTGAAGCATTTGATTTATGTTTG  
AGTAAATAAAGACATATCTTATAGGTATTGGCTTCCCTTCTCTTTAGAAA  
TGGAAGTGCAATGCTTCAAATTTCTTTCTTGGAAGCATGGACTCCTGAA  
GTTTTGCAAGCAATGCAACTCCAAGTCGTACACTTTTCAGTTTTCTACCGG  
GCTCATTGTGTTTTTGTGTTTCACTTAGGCCTCTCAGTGTCAAGACAAT

GGGAAATCTACTGGAAAAGATTCAAGAGCTTACAGCTTAGAAACAAATTA  
TATAAGAAACTAAAATAGGGAATTCAAATGTAAAATTTTACCTTCATCAA  
GGTACCTGGTATTCTGGTTATAAATATCATCCAAAATCCCCTGATTCTAT  
GGAGCATTTAACATTGCAAATAACTCTCCCTCCAGAGGGTCCTAAATTGG  
CTTGAGGATTTTACCCAGCCTTGTATCCACTGAATTTATTTTGCACAAA  
TGTCTCAAGTAGGTGAATGTATAGATCAGAGGCCGTTTTCTCAGCAGCCA  
TTTTCTTAGACCCTAATTTTTGATCTGGTTAAAAACAAAGTCTTTGGGCA  
ACCTAAATAAATTCTCATCAGTACTCCTTGAAATATCAATGTCATGGAAA  
ATGAAGAAAGACTGAGCAAGCGTCAAAGGAAACAAGAGAGAGACAGCAAC  
TAAATGCATGTGATACCGTGAATTGGATTCTGGAACAGAAAAATGATGCT  
TATGGAAGCAGGAGTGAATTCCAAATAAAGTCTGGGGCTTAGTGAATAGC  
AACATACCAGTGTTGGTTTTCTGAATTTGGGTAAATATGCAATGGCAGCCT  
CGGATGCTAACATTAGGAGAGTCTGAAACAGGCCATGGGTATACTGGAAC  
TCTGTATCATCCTTGCAAATATACCATAAATCTAAAAATTACTCCAAAAAA  
GAAAGTTTACCGAAGACTTACAATGGTAACAAAAGCTCTTTGAACATGGA  
ATACAAGAAAATTAATGTTTTCTCTTTCGTGGACAGTTTTTACCAAAAAAA  
AAAAAAAAAAAAAGAAGACGAAGAAGAAGAGGATATCTCTAGGTCACCTTGCT  
CTTCTCTCATCTTTTGATATCTAAATTATTATGACCTCAAAAAAATTACT  
GAGACTGTTATGGCAGAGGCACTTCTTGGAATCACCCAATGTGAATGAA  
AGTTTATTTGGTTATTTCATTCAACCCAGAGCTCCTTTTTCTGTTAATTTT  
TATAAAAAATTTCTATATATGTCACCAAAACATGAAAAACAATTTATCA  
GTAGATACAGTAGCAGACTGATGGAACCCCTACGGTTCAAGTCATAATTT  
TAAACTAAGGATATTTTGGGGCACCTGGGCAGCTCAGTTGATTGAGTGA  
CTGACTCTTGATCTCAGCTTAGGTATTGATCTCAGGGTCATGAGTTCAAG  
CCCAACATTGGGCTCCACACTGGGCATGGAGCCTACTTCAAATAAATAG  
ATAAAAAATAAATCAAGAATATTTTTAAGTTAGGATTAATGAATGATAA  
TATGTAAATAGGAAGTGAACATTTTTAAAAAAATTACATTTTTATATAA  
CAATCCGAAGGAATAGAGGACTATTGGTAAATGGGTCCATAATCTGTCTT  
TTCCAGTCATGTCACGTCTCAAAGTAACACCTTTCAATTGTTGCCCAATA  
AAATAATCAGAATAAAATTTTCATTCCTTATAACAATGTAGGTGTCATTG  
TGAATATATTATCCCCAAACATTTTCTTTTCTTTTCTTTTTTTAGATTTT  
TATTTATTTTTTCATTTCACGAGAAACACACAGAGAGAGAGGGAGGCAGAG  
ACACAGGCAGAGGGAGAAGCAGGCTCCATGCAGGGAGCCCAATGCAGGAC  
CCAGGACCCCAGAATCACACCTGAGCCAAAGACAGACACTCAACCACTG  
AGCTACCCCAAGTGCCCCGCCCTCCCCAAACATTTTCTCATTCACCTTCCCA  
TCGTTGCTATTCAACATTGTTGGTGCCATGGGTGGTTTACCCTGGAGCTA  
AAGCTAAAGCTTGGGTTTAGGTCTTATTTACATGGTGCCCTGCATGGTCA  
TATGCATTTATAAAGTTTGAAGAAATAAGTTACTTGAAGTGCATTGCTT  
TTGACAATCATCTGTCTCTACTCTGACATCCCTTCCATTACAGATTCTGA  
TCCCTAATGAGTAGCATTGGAGTGACCAAGAGAGCATTTACAGAGACCTG  
GCTAAAGGGAAGGGGAATTTGAGATGCATATGCATTTAATTTTAGTGTAT  
TGGATATATTTCTGTAGTGCACATAACTTTTATGTATTTTACAAGTTTC  
TAGGTGCTGGGGTCTGAAAATCCTCCACAAATGTATCTATTACCCATTGT  
GCCGCCTCATCAGGGGCAGTGACAAAGTACAGAGCCAGCAGTCTATGAAG  
ATATGCATGCATCCTATGGTGCCAGCAATGGGAGAACAATGTTTATAGA  
AGAGAAATGATATTTCTTATTTCCACAGAAGCTAATATATGGAAAATTCT  
TTTTTTTTTATGGAAAATCTTCTACAGTGCGTGGTCCTTATATGAAAGA  
AGCCTCATTTCCACAATTTGACAGCATTCTTAAAAATTACAGGATGTCAC  
CAAAAAGTTATAACACTTAAAGAACTTTTATCACTTGTGAGAAAAATAA  
ATCAGCCATCATAGATAGTTGACTGAATTATCTTTTTATTCTCCATACAG  
AAAATATTTTTAAAGATTTTGGTGTGTTATGAACAGGTTATCAAAGAGTA  
GGTAGCTGAAAATGTATGTAATAATTTTAGAAGTATTTATGTTTCAT  
TTTTTCGTGTTTTTGTAAATTTCTGAGCCTTTTAAAAATCTGTCATTTGT  
GGATCCTGTCATTCTAGCTACACATTAATATTCACATCTCGTTTTTACT  
CGTCTTTTTTATTATATTTTTTACAAAGAGTCTGCAAAAGTGTGTGAGCTT  
CAGGCTTTACAAAACCTAAATCTGTGTCTGTTTGTAAGACACTTTATAAA  
TTTATAATTGTGTGGCATTTCACAAATTGGACCAAAAGCTTACATAGAG  
TCGTCTAGCACCCCTAGTACAATCATTCACATTTGTAGACACAGAATCATC

TACAACACAGAGATAAGAAACAAGGCAGGTGGCAGCTGTCCTGAGTCCCC  
TCTCTCTCTCTGCCTGACTAGAACTTACCTCTTCTCCACGTCTCCTCTT  
GGCTGAGGTGAATTCTGTGACTTGCTAAGGTGTGCAGAATCTTCTTTAAC  
ACTTTAGCTTAGCTAGATGCCCAATTGTGATCCCCTCACCTTGGCCTAGA  
ATCTGGCTGCTGTGCCCCCGGTGAAAGGTTAGTGTTGCTAAGCTCATACT  
CCCCCTCCAGCGGAGACTCAATTCCCACCTAATAATTTGTGTTAAGCAGTA  
ATCAGTGATGTGCTTCATAAAATATGGACTAAAAGGTAGTTCTAGGGGGA  
AATGAAGAGATTTTGTCTCTATATTCCAAAAGATGCTGGGAAGTAACCT  
AAATTTTACATATTGCTTTAACTTTTGTACTACACAGTGAAAAGTAATAC  
AGCTATTTATTTTAAATCTTGAAAGAGGTAATGCAATACACTTTAAACCC  
AAATAATGGCATGAAAATGAGCAATCTAATAATATCCAAGCATTAGGAGA  
TAATGATTCCAATATTAAGTTTtagggTACAAAAGAAACCCAAGTACATTC  
TCAAGGCATAAGAGCAAATAGAAATAATAGCTTAGATGAGTCATTCAATT  
ATTTAGAAAGATGTTTCTTTTGGGGAAGAAAGAATAGAGAAAGAGAGAGA  
GACAGGGAGAGAAGAGAGAGAGAGAGAGAGAAGCTAACCATGAGACTCTT  
AAGAATAGAGAACAAACTGAGGGTTGATGGCTGGAGGTGGGTGGGGGATG  
GACATTAAGGAGGGGCCCTGGTTATGATGAGCATTGGGCGTTGTATTTAAG  
TGATGAATCACTAAATTCTACTCCTGGAAATAATATTACACTCTGCATTA  
ACTAACCGAATTTAAAGACAAATCTGAATAAAATAAAATAAAATAAAAT  
AAAAATAATAAAATAAAAAAGATGTTTCTTTCTAGCATAAAAATTAATGAG  
AATTAATAATTACACAACCTTATATATACACATATATATGTACACAGAGT  
CCTCCTTCTGCCAGTATTGTGATATAAAATTTATTCTTAACAAAAAATCA  
TTCTTGTTGTGCAAATACCAATTTCCATAGTTATTTTTTAATGTTTTTAA  
CTTCTTAACCTTGTTTTTAGATGTTTTGTATAATAGTTTGCTATTGGGAT  
CCCTGGGTGGCTCAGGGGTGAGCATCTGCCTTCAGCTCAGGGCGTGATC  
CTGGAGTCCCGGGATGGAGTCCACATCGGGCTCCCTGCATGGAGCCTGC  
TTCTCCCTCTGCCTGTGTCTCTGCCTCTCTGTCTCTGTATCTCTCATGAA  
TAAATAAATAAAGTCTTAAAAAAAAGTTTGCTATTGGATTATATTTTC  
CCTGTCTGGCCATTAAATGATCTACTTTTACAATGGTATCATATTTTGC  
TGGCATCATTTTTCTCCACTCCTCCCCTGTTCTTCTGCTTCATCTTTTT  
CTAAGCTCCATTATACCCACATTCACATTTGTGGCTTTCAGAGAGGGCC  
AAAATGCACAGCAAAGGAAAAACATCATAAATTCATTACGAAACTCTACTG  
TGTGATTCTTTATATATTCTTCTGTCTGCAAAGAGTATATTAATGGGAA  
TTTCTAATTTCTTCTTCAGAAAGTGAATAGTGTGAGTTGTTGAATTCCT  
GGGCCACTAATACATTTTAAAGGCTGACACTATTCAATTTGTATGTTGAA  
AGACACCTTCTCATCCAGTAAATCAATGAATATTGTGAAAAACAGTTGAC  
CTCTTTTTTTTTCTTTTTCCCGTCTCTGCAGGGTACATCAACACTTTCTTG  
GGCCAAAAGGAAAGAGAATACACATTTCTTCTATTTCTCAGATTTTCTGG  
CCCAAAGTACCTTTATTTATTGACCCACCATTAAATGCCTAAGCTATTCA  
GTAAACTCATAGTCTCCCTTCAGCAAGTTTTAATCTTTCAAGTCATAG  
ATACGTTACATATTTCTTTAACTTAAACAAACATTTCTTAACCTCCTACA  
TGTGTTATAAAACATTTTGTACACGCTTGTCTTAATCTTCTCAGGTTGC  
TATGACAAAGATACTGTAAAAAGGGCAGCTCATAAATAGCAAAGGCGGAT  
TCTCACAGTCTTGGAGGCTGGGAAGTGTGAGATCGTGGCATAGATTGAGG  
GTGTGATGAGAGCTTCCTTGTGATGGTGGTCTTACTATAACCTCACATG  
GCTGAAGAAGCAAGGGGCATTGCTGGGGCCTCTTACAGGGCATGAATCCC  
TCAGCCTTCATGATCCTACCACCTCCAAAGGCCCATCTCCAAATATCAT  
CATATCCGGGATTAGGTGTCAACACAGAAACTTGGTGGGGGTGGGAGGGG  
GTAAGCATTGAGTCCATAGCAGTATTTTACACATGTCAAGTCATTCAAT  
GTGCAAAGCAACCTGAGAAAGGAAGATCATTGTTGCCAGTTTGCATATAA  
TAATAAATAGAGGGCTCGGAGAAATTAATAAAAAAATCAACCAAGTGTGC  
AGAGTTGGACAAGGCCAGTTGGAGTTTCCCCACTCTATGTAAGTGGAAAA  
GAGCATGGACTCTGAGGTCACACTTAGGTTGGCTGGTCCCTCCACTGGCAA  
GTTCTAAGGTCTTGAGTAGGTTACTTCTCTACACCTCAATTTTCTACT  
CATAAAATGGAGGTAATATTAAGTGCCATAGAGGATATTTGTCAATGATT  
AAATGAAATAATATATTAAAGGAGCTCAAATTTGTATAGAAGGCTTCAGC  
TAGCTGTGGCATATAATTTCTGAACCCAAATCCAGTGCTTTCTCCTAAAT  
CCCACTCACTCCTCATCAAAATCTGCCTCTATAGATAGATGAAGGAAAAC

AGAACAACAATGGAGGAAAAATTTATTAAAGATGTGATGTTTTACTTCCA  
AGTCCAAGACTCATAATTCTATAAATTAGCAGACACCTCACATCACATTT  
AAATGTCTCTGCCTCCACTTTTCAGAAGGCACTTCCCCCTTCATGCCAATC  
CCCCTAATTGTATCACGTTACAACAAGTACAACATCATCGAGAAAAGCTTT  
AAAATACAAGAATCAAGAAGCATAACATGTATATGAGCAAGTGGGAACT  
AGAGAAGCTTTGTTTTCAATTATAGATTTCTGCGTAGCCAACTTCACTGC  
CTTCCTTAAATGGAAAAAGAGCTTAATGGAAAACCTCTGTTCTGTATGTTA  
AAAATCAAATTTGTGAAGATTTTATTAAGGAAAACCAAAACAACCTTTCCA  
TTTCTGGTTTTTAACCTAGAGCCAAATATGTTAGCCTAACAAGTTGGGGT  
GGGTGGGAAAGCAAACCGAGCAAATGCAGCATTTTAAAAATAATAATA  
ATAATAATAATAATAATAATAATGTTCTTGATAAAAAGCATAGGCTTC  
AAATGGCTATTTATGTTTGGTTTACATATGATCTCATGGGATACAGCTCA  
TTAAGTGATTATATGAAAAACACAAGAAAATCATTTTATCCAAGCAGTAGC  
CCCTCCAAATTTTCATCTCGAGTTAACCACAGTCCCTTAATGTTCCATTAG  
TATGGGGGAAAGTTCAAATTCAGAAATGCATAAATGAGCTCTCCAAAGGA  
AGGCATACGTCTATTTGGTTTTCTAGGTCTGGGCAAACGTTTCAGACAACT  
GTGTATTTTATCAAACTAACTATAAATATCTTTTCGATGCACATCCAATT  
ACCATGCAGGTCATTGTAAGTGACATGTCTGCAAAATTCCTGGAGCACTCA  
CTCTTTCCTTATTATAAAAAGCAACTACCTTAAGTTAATTGCCTTTTCTAT  
TTCAATCCGTTGGAGTGCTGCATGGCCGGTGCCCTAGGACAGAAACAGAA  
TTTAGAAAAAACTATTGCTACTGAAGCCTCTACCAGCTACACAGAGATCC  
TGTTTTAGTTTAGATAAAATGCCAAATACTCTTGGGCCCTATCTCTGTTAC  
CCACATTATTTCAAGTGTTTTTCATTTTCACTGGAGAGATTAGGGCTATCA  
CCTCCCAATCAAATTGAGAAATGATAAATTTATTGAAGATTCTGAAGATT  
CTGATTTTCAACTTGGAACATCAATACTTCAAGCCAATAGGAATCTCTCT  
GGTATCCAACACCATGAAAAAATTAAGAAGGGATTTAAGATAACCAACGC  
TGAGCCTGGTTTTACACTAATAGGCAAAACCAACATAAGGAAGTCACAGAG  
AAATAATCCACACCATAGATTTATATCTAACTTAATAAGCAGGGCAAAAC  
TCTCTCCAAAGACTCAGCCATGATAAATGATGCTTCAAATGCTTTTACTT  
TTATAACCGAAAGTGTGTAGATGTGTCAAAAAGATGCACCCTCCTAGGAA  
ACAAGGTAAAACACACTAGGTGCAAACGAATATGCTTTGTATAAACTTG  
AAGTCATTTTCACTTTAAAGAGAAAGTTATTCAATGATACTGACTTTTCC  
ATTCAACAAGAGGAGCTCTAGAAAAAATTTAATGTCTTAAGGATGTGGTA  
AATTGCTTTGTAATATAAAATCATATTTGAGGGTTGTGTAAGCTCTAAAG  
TGTATGATGGATATAAACCAAGGATCAAAAATTTTCATGAGCACATCTCT  
TATCCTAGAGATGGCCACTTCCTTCATTCTATTTGCATCCTTAGTCCAGA  
TTGTAGGGATCCACTCCTACAGACAACTGCCTCCTAACTCATCCCCTGCC  
CCTAGTAGCACCTCTGAAAAGAACTTCAGCTACATTCCTACCACTAATAT  
CTTTAAACAAGTCAGATGTGAACATGTCAGTCCTCAGCTGAAAACCTAAT  
AGATCCTCCTAGCCCATGGAGTATAAAGTCTGATCTAAGATCTTGGCTTT  
ACCGACATGGCTTTGCTGATTTCCAATTTTATCATGTACTACTTACCTTC  
CCTGGATCACTGCATGCCATGATCTCACAAACACCAAACTACTTGTGGTCG  
CTTACAGACAACAAGCTCATGTAATACCTACTTGTCTTCGCTGCTGACTC  
TTCCCACCTGGGTTAAGAATAATTATGTTCCCCCTGCCTCAACAACCTGCC  
CCCTTTGTATGTTTGGGTAACAGATATGGTTCAAGAGTAAGACAGCTGGC  
CACATACATGATTTTCATGACACTCCCCATTTGTCTCATTCATTTTACTC  
TCTCCTCAGAATACTTTGGCACCTTAAGTGCACCTTTATTTTTTTTTTAATT  
TTTATTTATTTATGATAGTCACACACAGAGGGAGAGGCAGAGACACAG  
GCAGAGGGAGAAGCAGGCCCCATGCACCAGGAGCCGACGTGGGACTCGA  
TCCCGGGTCTCCAGGATCGCGCCCTGGGTCAAAGGCAGGCGCCAAACCGC  
TGCGCCACCCAGGGATCCCAACTGCACCTTTATTATTGTATTTCATTTATCC  
TTCACTGTTTTCTGTTATTGTAGTGCATTTTCAGGTTTGAGTTCTACTGTT  
AATTCTTTTTCTTTCTAGTTTTTATTTAAATTCTACTTAGTTAATATACA  
ATGTAATGTTAGTTTCAGGTGTTAGAATTTTATGATTTGTCACCTTACATG  
CAGCCAGTGCTCATCACAAGTGTCTTCCTTAATCCCCATCACCTATTTTA  
TCCATTTCCCCACTCACCTCCCCCTCTGGTAACCATTAGTTTGTTCATA  
GTTAAGAGTCTTTTTTTTTTTTTTTTTTCTTCCGAGGTTTATTTGTTTTG  
TTTCTTAAATTCTATATATGGAGGGATGCCTGGGTGGCTCAGTGGTTGAG

CATCTGCCTCCGGCTCAAGGCATGATCCCAGGGTCCTGGGATCGAGGCCT  
GCATTGGACACCCCACAAGGAGCCTGCTTCTCCTTTTGCCTATGTCTCTG  
CCTCTCTGTATCTCTCATGAAAAATAAATAAAATCTTTTAAAGAATTCT  
ATACATAAGTTAAATCATATGGTATTTTTCTTTCCCTGATTGACTTATTT  
CACTTAGCCCCACCCCACCTTATTTCACTTGGCCCCACTTAGCCCCATAAT  
ACACTCTAGCCCCACCCATGTCATTGCAAATAGCAAGATTTTATTCTTTT  
TGATGGCCGAGTAATCTTCCATTGCAATATATACCACATTTTCTTTATTC  
ATTCATCAGTTGATGGACATTTGGGCTCTTTCCATAATTTGGCTATTGTT  
GATAATGCTGCTATGAATGTCAGGGTGCATATATTTCTTTGAATTAATAT  
TCTGTTTTTAAATATTTTATTTATTTTATTCATGAAAGACACACACACACAC  
ACACACACAGGGAGAGGGGAGAGACACAGGAAAAGGAGAAGCAGGCTCC  
ATGCAGGGAGCCCAATGCAGGACTCGATCCCGGGACTCCAGGATCATGCC  
CTGGGCTGAAGGCAGGTGCCAAACTGCTGAGCCACACAGGGATCCTTGAA  
TTAATATTTCTTGATTTCTTTGAGTAAATACCTAGTAGTGTCATTGCCGGA  
TCATTCAGTTGTTATATTTTTTAACTTTTTTGAGGAATCTCCATCTTGTTTT  
CCACAGCACTGCACCTGTTGGCATTCCCACCAACAGTGTAAGGGTTCA  
CCTTTCTCCATCTTCTCACCAACACCTGTTGTTTCCCTGTGTTGTTAATTT  
TAGCCATTCTGACAAGTGTGAGGTAGTATCTCATTGTGGTTTTGATTTAT  
ATTTCCCTGATGATGAATAATGTTGAACTATTATTAGACTTGAAAATCCT  
AGTGGGCAGAAGTAGTGTGTTTTTATTTATTTTATTTTGCTGTATAATGT  
CTTATAAAATTCATATTCATAGTTGATGAGTCATATTTATTAGACTAAAA  
TGAACCGGGATCTTTTGGCTAGATTAAATCCATGCAACTGTATACTAAGGT  
GACCTTTTTGTTTCTTTGTTTGCTTGCTTGTTTAAAGATTAAAAATCATTC  
TCCACAGTTGATTGACAAAAGATTGTACTGAGAGAAGGCCAGAGTGGCAC  
TTGGGTGGCTCATTTGGTTGGGCAGTTGACTCTTGATTTGAGCTGAGGTC  
ATGATCTCAGGGTTCTGGGATCAAGCCCTGTGTGAGGCTCCATGCTCACC  
AGGGAGTCTCTTTGAGGATTCACCTTCTCTTTCCCTCTTCCCCTGCCGTTT  
CCTCCTCTCTAAATAAATGGATAAACTTTAAAAAGAAAAAAGAAAAAG  
GCCAGAATTTGCACAGAATAAGTATCTGGGAAAGGAGGCCACTACATCCT  
CTTAAATATTTTAGAATTAGATAAAACAGAGAAATAAAATGTATTGTGGT  
CTCTTATTTTTTAAAAAAGTGAAGCACTAGAGGTGAGGAAAGTAATAGGAA  
TAGCATACTTTTAAAGTGTGTCTCCATTTTTTATGCTAAAAAGAAAAAGAT  
GTTTTATAAGACGACAGTAGAAAAATATTTTCATTAGATAAACCCAGTTC  
CATAAACAAACATGCACATAAAAGCCTATCATTATTTATCTAAAAAGCAT  
TTTCTTGGAAGATGTTTTTCTTTTTTAACTGTCAAATACAAGCACTCAT  
AAGTCTGATCTTGCACACTGAAATCATCTGATGTCACCACTAAAGTTCAA  
AATGTTGCCCTCTACTGCTGAATATATTTTTTTTCATTCATCCTCAGATATT  
ATCAAGTGCCCTACCACATGCCAGTCCCTGGTGCTGGAGTTAATATATTGT  
GTTTCTGTGTGGAGGATGGTGGGGGAAGGGTGAGAGGACAGTAGAGAACA  
AAACAAACAAAAATAACGACAGAAATAAATAAGGCAAGACCCTGTCCCTG  
GGAAGTTCACCTTTTGCCCTGTGTGTAATAAGCCAATAATCCAAATGCAA  
GGGAGGGGAGGACAGAAGATGCCTTGATCATATTCAAAATGCCTGATGCT  
TAATATAGATTGTAAAAAAGTAACGCTCCCCTGAATCTTTGCATTCAAAT  
ATTCTCCGATATTTTCATTACAATAGCTACATAATTTTTTCACCGAATGTTT  
CTTTGAAGCTTAACCAGGTTTTTAATTTTTATTTTCACAAATTACTGTCA  
CAAAGAAGGTTGTGTTACTAGCATCCCTTTGTATTTGACAACATCTTTGT  
TCATTTTTTTTAGGATGGCTTCCCTAAGAAGAGAGTTGATTAGTCAACTTTA  
AATCTGAATATTTTACCGGATTACTTAAAAAATGATAACCTAAATGTGTAT  
TTCCAAAATTATAGGAGAATGTACCTCTCATCTCAATTATTTTCAATATT  
TGTCATTTTTTATTGATAAGAAATGCATTGTGTGAGGCATTAGTGCCTCAT  
GCTTTCTTTTTTCCAAATGAGAATTTTTATCTGTAAATATCTGTGTATGT  
CTTTTTTCGCATTATTTCATTCCCTTCGAGGTGTAATTTCCCCTTATTTAGTT  
ATTAGCAAGCTTTATAGATTGCACATATTTCCCCAGTCTATAGTTTGACC  
CTCTGATTTTAAATTAAGATAGTTATACCATCTCGCGACGCCTAGGTGGCCC  
AGTGAGCGGTTGAGCATCTGCCCTTGGTTTCAGGTCAGGATCCCAGGGTCC  
TGGGATCAAGTTCCACATCGGGCTCCCTGGATGGAGCCTGCTTCTCCCTC  
TGCTGTGTCTCTGCCTCTCTCTCTCTGTGTGTGTGTGTGTGTCTCTCAG  
GAATAAATAAATAAAATCTTTAAATAAAAAAGATAGTTATACCATCTACC

CTTAAC TTT CATGTGTG CAAATATCTT CACTATG TTTTTCCTTTTG TTTT  
AATGCTGACAAAAGCTTCCTTCATTCTAACAGCAAGTAGATATTTAGCTA  
TATATTTTTGAGGTTCTTTTTGGTTGTTCTTCCTCTTCTTTCATATATTT  
GATTGTGGAATCAATGCAGAATTTATTTTGGTAAATGGCACCTGGTGATG  
CTCTGACAGCATGTTCAAAATATTACAAATCTAATACAATTATGGTTAAC  
CCTTTCTTTTACTACAGATTTTGT TACTCTACCTCCAAAAATTAAGTAAA  
TTCAAGTGTCCACATGAATTATTTATGAGATCTCTCTTCTGCATGATTGA  
TCAGTCTATATATTCTGGTGTGAGGAGCACCCATTTAAAATTAATATAGT  
TTAATAAGATGCTTTAATATCTCCTCTGATAGGTCTCTCTCCCTTTGTAA  
CTGTGATCACTACACTTTTTAGATGTGCTGTTATTGGTTTGT CACCCCTA  
CTTCCCAGAAGATTCTTCATGGCCACAGAAGTGAGTGATGGCTCCCCATA  
TCCTAGCTAGTCCAGATTCCAGTCTTTAAAGAAAAGAGAGGATTGGA  
AAGAGAAGGGAAAAAATTA AATTGCCTTCTTTCTTCCCAATGTTTCTCA  
TTAGGTATGGTGTCTGCATATCACTTTAAAAAACTCAACTCTTCTAAAA  
CATGAAAATCAATACAGATTCTGGCAATAGGTTACCTTTTGGTTTTAATT  
TTTAGTAGTACTTGAAGTTTTCAACATTTGTAAATTATGGTTAATTTGTT  
AGGGGTAAATTGAGAAAAATTTACCCAGAGAGCCCTGCCTGGCTTTTTATA  
ATGATTGGTCAAACTCACAAAGGACCATATCATATGTTAGGAACAAAGA  
TGTAAGACAGATGGTTGAGAATGGATCAATAGAAGGAAGGGTAAAGCTTG  
CTCTTTCGGGAATGAAATTGTCTATTCTCTCCTGGAGGTAAACATCTAGA  
TATTTCCCAATCGATTAATAACGTAGCTATTCTGTGTTATTTTCCACGTAT  
CTGTGAAATACTGTGGGAATTGGGTAAAATGTTTCCCTACAGAAACAAAT  
CTTGAACGTGTGAATTTAAATTACAGAATTCATTTGATTCTAATGGATGCT  
ATACATTTGAAATCTAGCTGTTGTGATTGTTTCCTAACCTCAGATATCAC  
TCACCTTCTGTACTGATGGGAGTTTGTACCTGTCTGAAGGTACCAGCACT  
GAAGTTGTGAGGCTATTCCCTCTGGGGTCTTATTTCTTGTGCTCGATTTGC  
TGATGTTGAAATGTCTCATATTCTACTGGGCACAAATATTCCAAACATTA  
CTCACCGAAATTAAAGGAAGGTAGACCATATTGGAATGGAATTACTCATT  
CACTTCAATGCAGTCTAACATGGCTAATTCCATGCGGGAGTCTTAAGTTT  
AAATAAACTTTCCATGGCAATCTATTTTCTGAAGACTTTTGCTTTGTTTG  
AATTCTTTTATAGAAGGACATTTCCCTCCATATGTTTATTCTCACAGACA  
AATACAGGAAAAAGCCCACTTGCTCTTGTTGACCTTTCTGCTTAGCAACT  
ATTACTTTCCTTAGCTCAAAGGTAATTCTTTATTCAAGAGGGCCTTATTT  
AGAACACATGATAGGCATT CAGAGTTTTCCAGTAGCCTCTGAATACCACA  
GAGTATTTATTTACATTGTATAAAATTAGAGGAAATGACGGGGTATGCAT  
TTGAACTAGAAGCAACAGCCTAATTCTCTTTATGGAGAGATTCAGTCAAT  
GTCACTTTGTGGGTGGGTGGGGGCGGTGGGGGGAGGGGACTCAAATCAC  
AGACATTTTAAGCAATACAGGTTTTTGT TACCCAACAATGAATTATATTG  
TGCTGCTTTCTAAATAAGACCAAGGCAGTGAATTATGGACAATTTCTATC  
CTGTGCATTGTCTTCGAGTACATTTTGATTCTCTGTCTTAGGAAGCCAAGG  
CATAAGGAATCACCTTTGCTGACCTAGCCCAAGAAGGACTACTTTAGGGG  
GAAACATTATTTAAAAAGGACTGATATGCATCTAATAGGATATCTAACTT  
TACAGGAGCCCATGTGTTTGACACAGATCGTTAACAGAAAATCAGCTAC  
TGACCACCCAGTGGCTGATATTACAAATAGAATTTGTACCAGAACAGATC  
ACAACTCTTGTCTTTCTATTGTCTTAACAAGGGAGCATCTTACTTATTT  
AGTTTGAATTTAGATATACTTGGCAGCAAATTTTGTAGAACGGAACAATC  
AAGTGTAATGTCTGGGACAAAATGCTATAGAAATGTACTCTTGATGTTTCT  
TAAAGTAACATGAAAAGGTAATATATCAACTCAAAGGGCAAAAATACTTC  
ACAGTACCTATCTCGTGGGATGTTTATTATGAAAAACAAATAGCAATTAC  
AAAACAAGGACATAAAAGCAATTCTAGAAATAAAAGCTGGCTGGGATCAA  
TATTATGCAGATACCAAAGTGTTAACTATATATCTCCATCTTAAGAAAA  
TCTTAGGAAGAAAAAATAGTAACTGACACTAAAAATAGGCTTGATGGAT  
CCATAATAATAAATTCCCATTGAACAAGGTCAATTTTTCAAAGTAATTGC  
TTCACATATCCAAATCCTTATGATTTAAACTCTTCTTAGAAGACATTTTA  
TAAATCACTTTGCAGAAATCCTTATTAAAGACCCTATTTTGT TTTCTCAA  
CTCCACAGAAGGGAAGGTAGCCCTGGTGACGTCTCAATTTTAGTAGGGTG  
AGATCCTTACTGGACTCCTGATCTGTAGAACTGTGAAATCATAAATATGT  
GTTCTTTTAAGCCCCCAGCCCCCAAATATAATCTGTTTAATTTATCAG

GCTCAATGAGGAACCAATGCAAGAAAGAATATATGGGTTGGGGATGCCTG  
GCTGGCTCAGTTGGTAGAACATGTGACTCTTGATCTCAGGGTTGAGTTTG  
AGACCCACTTTGGGTATAGAGATTATTTAAAAATAAAATCTTTTTCAAAA  
ATATTATTTATTTATTTATTTATTTATTTATTTATTTATTTATTTAAGAG  
AGCAAGCAAGCGAGCAAGAGAGAGCATGAGTGGAAGGAATAGAAAAGGAG  
AGGTAGAAGCAGACTCCCCGCTGAGCAGCGAGCCCTACATGGGGCTCAAT  
CCAGTGACTCTGGGATCATGACCTGAGCCGAAGGCAGAAAGTTTAAGTAAC  
TGAGCCACCTAGGTACCCCTTAAGAATAAAATCTTTAAAAAATTATGTAC  
AGATTGAAACATTGTCATTTTCACCTGTATATACCTCAGAACCCTAAAAT  
CCAGAATAAGTTTTGCCAATACAACCTCAATGAAGATTCTAATAAAAGAA  
TTCTTTAAGGATATAAAAAAGAACATTTTAAGAGCAGGTTCTATATTAAA  
ATATGATTTTGAAATACTCTAGTGAGTTTCATATTATTTAGAAAACTCC  
ACTAAATATCAAATGTAATTCATACACACATTGATTTAACAAGAGTTAGA  
TATAGCAATTTGTGTGTTGAAAAACAATTATTTTCCAAATTTATGCATTC  
ACATATTTATATGGTTGTGTATATATGCATATGTGTACGTATATAGATAT  
AGAATTTAAAGTGTTTTATTTGTAAATAGCATGCTATTAGGAAATATTTAT  
TTTTTCCTTTTCATTTTTCTGTTTTTTAAATATTTAATATTAATATAGAC  
ATACTGATGGTATACTTGGAAGCAGGCTTATGGGATGGTTAAATACCCTA  
ACAAAACATGTTTTTTGTATATCTCTTATCACATCCAATTAGGATCCAT  
ATAATGTTAAGTTGCCTACAATTGAGGAACTTGGTTAGAGTTGGACAGC  
CAGATGGATCCATTGTAATGTACATTTTCCCATTCAATAATTATTATCAA  
GGTCTCAATATTGTAAAAAAATGTTAAATCAACACAATTTTGTAGGACA  
TGCAAATTCTTTTTGGGGGGTTATTTGGAGTTAATAATCATTTTCACTTT  
ATTAATATTATTTTGTATTATGTCTTCTGTGCCATGAGAAAATTGGTCTA  
TATTTTTTTCTCTTTTAAATTTAGAGAGTAAGTTCTGTCCATTGAGACCT  
ACTTCTGTGTTTCACCTCAGGTAACAGTCATCTATTCCCTCCAACATGATA  
ATCTTTTCTCTCCTATCACATTTGCTTTTCTCCTTGCTCACTCCAGCCACC  
TCACAATAAAAAAAGCAGGGGATTGTAATTATCATCTATTTATCAGCTGC  
AATTATGGAAAGGAAGAGATGGCACACTTACCGTAAGCAAGTGGATGTTA  
GACCTGTACCTGGATACACTCTCCTCTCTTCTCTAATATAACATAACAT  
AAGTCTGAAAGAAAGCCAGCTAACACAGTCCCTAAAGGCCAGCTTCCCCA  
GCACAGGGGTAGTGCAGGGGGAGAGCAGATAAAGGATCTGTAGGACCAAA  
TGGATGATGTCCAGCACTCTCTCCTTTGAGGTTTGAATTTGTCTGCTAA  
ACACTCTAAAGCAATTGTTTTAAATTTCTGTGAGCCTCAGATAATTTTGAG  
AACTTGAGGAAGACTATAATCTCTCAATACCCTCAAATATACCTGTAAAC  
ACAGATGAACATGCACACACATACACATGCACATGTGCACACACACACAC  
ACACACACAAAGATACCACAATGGGGTTTGCATTTTAGCAAGCCTTAGG  
AACTGCTTGAGCCTATCCAAAGATCCAGGTTAAGAAATATCTACTGTATA  
TTAACAACGTTTAGGGATCTTATTTTTTTTCTCACGTGAATATTTTAATT  
CTACTTTCTTTGGCAAAATAAAGGAGGGTTTTTATCTAACTTTGTGGCCT  
CTGAGCCAATCAATTGTCTGGAAAACATACGGACAATCAAGAGAATACTC  
TTGTCAAGAAATTCACCCCTGGCAATCACATCAATATGGAAATGATTTGC  
AAGTATTTATTTTAAAATACATTTATGGGATTTAAGAGTTTTAAGTGAGG  
GTGTATATTCAAACAGCAGTATTTAAACGGTTTATATTAAACTATTCTA  
ATTCACTATAGCTGCAAGTTAGACATACTTCATGTTCAAAGTCATTTGTT  
ATACAACCAACTCTTCTATTACAAACTCTTCTAGGATAATTTGGAAATGG  
GCTGAATTAATGATATATTTTAAAAGCAAAACGTTGCAATTTTTTGGGGGG  
GAAATGTTGAAGTATTTTTGAGTTGTAGAGAAAACACTCGTGCCTCTGAT  
AGAAATCCAATGAATGGTGCTTCTTTAAAGGATATATGGATCATGGTCGG  
AGACCCAGGGGAAAGCTGAAATCTGTGTGGTGATATAACTGTCACATCGA  
CACAGGAACGGGTCTGTGTGATATTAGCCTGGCTAATCATTTTGCTAATTG  
GACAGCCAGTTGAGCCACAGTGCAAAGTCAGATCGGTTTCACTTTAACT  
ACTCACACAGATGATGTTTGACTCAAATGCATTACTTTATATCAACACAC  
CAAATGGCTGTAAAAATAATACCACATGTGTTGCTGCTTCTTTTTAATAA  
GTGTCTTCCTCAATTTTCCCTGTTATAATAGAGATTTTAACACAGAAAAA  
TTAAAGGTTATTTTAAAGGGTATCAGTTGAAAAAGGCACCCATAAGATTTT  
GGAAATAAATCCTGCTCCCAGGGCAGCTCCTAGCATCATTAATCTGTCAC  
TTGCCCTTCCTTGAAGCAACTCCATTCAAGTGGACCTACCTTTTGATTTT

CTGGGTAAGAAGCACCATGTCTTCTTTCTGCTTCCTTCATACAAATTAT  
GTGGCTTCATCTCAAAAATCAAATCAAGTTTTTAAACAAATATATCCCAT  
TTCTCCCTTTTTAGATTTTTTATAAATTAGATTCTTGCACATATTTCCATG  
TATTAAGTGAAATGCACGATTATTTTGAATATGCCAGACTAGTCTATAG  
TGCCAAATCAAATAGGCTGCATATCTTATGAGAAACAGAACCCCTTACTG  
ACTGATGGTTGAGATCAGGCTCTTCCTTTTATTAGTGATTTTTATCTTCA  
AAGTTAAAAAATATATATATTGTAAAGTTCCCATTTGTATAGGTGGTCCAG  
GATCTGCCAGCTAGTTACTGAAGATACCCCTCAAGGGAAGGACTTTTGCA  
GTCGATTTATATAAAACAATCCGGATTAGTGTATTTTCAGATCAATTGAAT  
TAGGTTGGCGCCAAAACCTAGTAGGCATTGGCCTTGAAGACAAGAAGTATT  
AAAACCTAAGGATGAGACTTTACACAACCTAGTAAATATTAAGCTTTCAA  
AATAAGTTCTTTTGTGGTAATGAATATGAGTTTTTGCATTTTCTGGCTGG  
ATAACTTATTATTTCTCAAAAACAAAACCTACTCTTTAGAGAATTTTTTAA  
AAGATTGTTTAGGACCTTTAGTATTTTAGAGGATTTGAATATCTATCATG  
CTACTTTATAATGGGATTTAAACCTGTTGATCAAAATCCCTACCAGGTCAA  
TCTATTAACCTAGGAATCAGGAAAATGGATCTAAGTTTCATTTCCCTTTGTT  
TCTCCTGTTTAAACGTTTGCTGCAAGTGCAAATGGACATTGAAGTAAATAA  
TGGTAAGAGAATCTTGCCGTAGCCATACATCTTGGCACTGTGGAAAAAGC  
TGACCCAAGTGGGAAAATACATTATCTTGGGAGCGTCTGGGTGGCTCAGT  
CGGTAAAGCATCCAACCTCTTGTTTTTCAGCTCTGGTCATGATCTTGGGGTT  
GTGAGATCGAGCCCCTGGTGGGGCTCCACACTCAACAAGGAGTCTGCTTG  
AGATTCTCTCATTCTCCCTCTGCTCACGTGTTCACTCAAGCACTCTGTCT  
CTCTAAAATAAATAAATAAACGCTCTACGTATATACTACATATGTAAAAA  
TCTTGAAAAATGATTGATTTTGAGTATGTGCATTCAAAGAGAATAACAAA  
TTGTCCCATTTGTTGCTTCAATAGGTAAAAATGGAAATATCTAAACTCAT  
ATTAATCTATATACATTCCCTTGAATGCTCTACCATCTTATCTTTATGAC  
TGCATCTGCTGTTCCCTCTGCCTGTGATACTTTTTTGCTACCCATGTTCA  
CTCTGTTCTCACCAAGCCTGCCTTTCTGACTCACAGTTCTCTGGTCTAAG  
GCTCAAGTCAATTCCCTCCAGGGAGGCCTTCCTGCATTCTTTCCACCTCC  
TGCCAGGATGTTAGAAATTCCTTTTCTGAGGGGTGCCTGGGTGGCTCAGT  
GGGTAAAGCGTCTGCCTTCAGCTCAGGTCACGATCCTGGGGTCCTGAGAT  
TGAGCCCCCTGGAGGGGTTCCTTGCTTGGCAGGAAGTCTGCTTCTCCCTCT  
CCTTCTGCTCCCTCTCTGTCTGCTCTCTCTCTCAAATAGATAAGTAAAT  
CTTCGAAAAAAAAAAAAAGAAAAATAAATTTATTCTCCTTTTTCTGTAA  
TTTATTTAGCCTCATATACTCTTATTTTACTAAAGCATTTTTTAACACTG  
CCTTCTAACAGCTAACTTGTCTTTCTCCCTGAGAAAGTTCTTAAGAATA  
GTTTTTATCTTAGAATCATTCACCCAGAATACTATCTGACTTTCATATG  
ATAGATCATAAATAAATACTCATTGCATTGAATTGGCACCCAATCATTTG  
GACAACTTTTCAAATTTAAATCTGAGTTTATGGCTATAGTAATCCAGGC  
TTTCTTTCCCTTGGCATGGCTAGGTTGGCCTATGGATACTCTTGGTGTAGT  
TGCCATAGACACATGCAGCCAGGAAATCAGTGTTTCCTTCTCAGAGCTTC  
AAATGTCACATGTTATAATTGTGGTCATTTGTCCAGTCAGTAATTCAAAG  
GCCTCATCTTGAGAATGAGGAAATAAAAAGATCAAACCAAGTTTTATATT  
CTTTTGACCTTGACATTACATAGTGAAAATAACATATGTTTATTATAAAC  
TCCGTAAAGGACTGAAAATATTTTCTTCGTTTCTGTATTCTAGTGGCAGT  
GCACTGTTACTGTGATTGAAATCCGTATTGAATTAATAAGCAAGTAGCAT  
GACTTTTCAAGATTACTACTGTCACTAGTGATGTATTTCTTCATTAGAAG  
CAGATCTTCCCTGCCTCTTTGAAACTGGGATCTGGATTATTATTTATTTTA  
TTTTATTTATTTATTTCTAGAGAAACAGAGAGAGAGAGCAGAGACATAGG  
CAGAAGGAGAAGCAGGCTCCCTATAGGGAGCCTGATGCAGGTCTCAATCA  
CAGGACCCCGGGATCACAATGATCTGAGCCAAAGGCAGATGCTCCACCAC  
TGAGCCACCCCATAGTTGGTGGGTCTGGTGCTCCTGGGGACTGGATTATT  
TAGATATGTGATATACTGTCAACTAAGAATGGGTTTGGCTATAGGGACGT  
CAAGTTGTCTTGGTTAAAACAGAACTACTATTACAATCTAGAATATTGA  
ATAGTAAGTAAAGCCCTGTTTAACTGTGCTAGCGGCCCATGTGAAAAACT  
CACTCTGGCCTTCAAGACTCTGCAAAATATTATAGTTCACCAGTTAATAT  
CCTTTCTCTTATTCATCAGGGTGCAGCCCCAGTAGCCTTTTGCATAGTTT  
CTCTAGCATGGTTGTTTCTGCCCTAAAGTTTTTGTTCCTTACTTTTGCTGT

CAAACCTTCTCAAAGCTGATTTGGTTTCCTGTCATCCAACCTCCCAGTGTG  
AATGTGTCTTTAAAATATCTTCCCTAATGATAAACATAAGTAGCTTCCTT  
CTGTCTTGCTCTATTCCATCACTCAGTGTTACTTGTCTCATCACATTTAC  
CATCCAAAAAATTATCTAGTTTGTGTTTTGTTTTCTGGTCCAATGGAATAG  
ATGATAGATAGATAGATAGATAGATAGATAGATAGATAGATAGATAGATAG  
ATAGGCGATAGATCGATAGATAAGAGGGTCTTTGAGAACAGGGTCCTTAT  
TCCTTGCAGCTGTGGTTTTCTCACTGCCTGAAACAGTGTTAATTTATTGA  
ATGAAATGGATTTTCAAATAAGTGTGAGCTCTTTTTGTCTATGCCTCCAG  
GATATAAGTGACTACTGAGAATGTATGTGGTACACCCAGGTATTACGTAT  
GTCTATAGTATACGATGTGTAATATAGTACATGATTTTGTTCGAAGTCAG  
ACTGCAGAAGTCAGTAGCACATCATCAATGATCTGTTTAAATATAGGTTG  
AAAAAGAGGAAAAATTTGTTTTTAGCACCTAATTCAAATTTAAGAAAAAA  
AGCACTGCACTGTGAATACTTATTATAATTTGGTTGAAACTGATCTGATG  
TGGACTTAAGGTGCATTAGAGGTGTTTGGAATCGAAGACAAGAGTCTGTA  
AAGATAATATATTATTCTAGCCTTCATTGCTTCCCCGAAAATTGAAAGTGC  
GTTCTCCATGATCCTCCTTAGGGAAAGGAGACTTATTCAGAGTGGGAGTT  
TGCCTGCATTTGATTGTTTCAGCTGTATATCAACTGGCGTGGGTTCAGCAG  
GGGTCTCTGCCATTCTGCATTCAATCCTCCAGAAAATCACCACCCAAATA  
TCCTACAACAGGGATCAGGCTTCGGTTTAAAGTGCTGCTCCCCTCACATAC  
TTGTGTTCTAGTCATTTAGAAAAGTGTGATTA AAAAACCATTATGTGCCCT  
AACAGATGTGACCTTGAAGAGTCTACTAAGGTTTTAAAAAAAAGGTGC  
AAAGCAATAGTGGTTAGACTAACACCAGGAAAGTATTATATGAGCTGAAC  
CACATTGAAAACTTCTCATTGATTACTACCTTCTGTTTTCAAGAAAAATA  
CCACGATGTTTAAAGAAATGAGCTGCAACGTTCTAAATCAGCTCCCCTTGC  
CCCATCTCTCTGCTCTCCTGGTTCTAATGAGAGACAAATTAACCTTAGAT  
GGTTTCTGAATTTAAAATACTCTTCGCTGGAAGAGGATTATTGTATTGTT  
ACATCTTCATTTTCTCTACTCTCAGATAATTTCTTTATGTACCAAGAAA  
ATATAAAACAAACAAAATACAACCATGGAAACCATTTAGAAAATGAGATC  
CCCCACCTTTAAAAAAAATCTCTCTTGTAAGTACTAATGCACGCTTG  
GCAATCGTGAGGAAATAAACAACCTATCTTTTATTAAGCATGCTACTCCTG  
ATTTCCCTGAGAGTTCATAAAATCACCTCAATATTTTTGTATTTACTAT  
AATTGACTATATCTTGCCACAAATGTGCTGCTACTGAGCTGCCAATGTT  
AGAATATGTAAAATAAGTTGTCAGTACAATAGGAGAGCTTTTTAACAAGT  
AACAACCTCTCCTGTTTGTAAGGACTGATACCATATCCTTCTCTCTGCTG  
TCATTTCTTTATCCTATGTATGACCAATGATATAAATTAATAGGAAATCT  
CCTCGGCAAAGGGTAGAGTCTGCCATCATGGGAATTTGTCTACTGAATCG  
GACTCAGTAATATTAGGCATAAGATATATTTGCCTGAAAAATCTATTAGC  
AATACACATATGTGTTTCATTAGCATTTATAGTAACGTTAGAATAGTTAT  
TTTTTTGCCCTCAATTATGAGCCTGAAAAGTGTGTTTTTCAGCTTCATTTTT  
ATCTTTTCTTTATATGGATTCATAGTGTGTTATAAGCAATAGGACAATTTA  
AAAAAGGCTATCGGGAATCAGAAAAGGTAGCTTCGAACCCCTCATGTGAC  
ACTCAGAGGGCTGGCTATACGAGTTAAGGCTTTACAATTGCACAATGCAT  
TATTAAATTATAAGCACCTTTGATATATTACCAAGTAAGGAGATATTTTG  
TAACAATTTTTAAGTTAAAAAGTTTTTAAAAGGCCTCTAATATTATCCAA  
TGTA AAAAATGGAGGTGAGAATATTAGGAGTAGCTATATCCAACCTCTTG  
AAAATTGGAGTAAATTTGTTGTTTGAAATCAGCCCCTGTAAACATAGGTG  
TTTGTCCCTTCTGACACCAACCAACTATGAAATTACCTTAAAGTCTGTAA  
AATAATATTCTGCTACTGTGGGTAATTACATGTTATGCATATTTTAATTG  
TTTAAATAGAGTGTGCTGAATGAACCTGGGGAAAAGCGTCATCCTTCA  
TCTCTGCCTCAGGAGAAGGTATCAAAGAAGTGAAGGAAAGTAGTTAGGATT  
GGAATGAAGGCATTTAATTGCTTAGTGAACCAAGTCATGGCTGTTCTTCC  
GTTGAACATATTAGCATTATCTCTCCAACAGGAAACAGAAATTTATCAGGT  
AGCATAAAAGAACAAGAGAGTTGTCTTAGAAACAGAAAGCAGAATTGTT  
TCCAAACCAACCGGTTCAAGAGGATGCCTTTTCATCAGATTTCTGTGTCCA  
CAGCCTCACTCTACCCAGGGTTCTAGTAAAAGCTAGCAGAATGAGTCATG  
AATTCAGTAGTGTTAAATGTAGCTCATACAAAATGGAGTAGTAATGTAA  
CTCATCTACATGCTCTACCAGATATGATTCCGGGCAATGTTAAGATTTCT  
AAGGATGCCAGAGCTATAAAGGTGAATATGGTGACTTGTAAGATCTTTTG

AACACAGAAGAGTAGACTAGTCACAAGGTAGGAAAGATACCAAGACTCAGG  
 ATAACCTTCTTTATAGTCCAGAGACATTGGTGTCAATATACAGACCTGAGG  
 TAAGACGTAAAGTTGGAAGGTGCCATGTTCAACCTGGCTAGACAGAAATT  
 CTTTCTTGAAATTTCTACTTTATAAAAACTAGTTTCCTACTAAGGAAATATA  
 TCCCTTCTAAGGAATATAAGGAATATATTCCTTCCTTCAAAGTTTGCCT  
 AACAAACGTTAAGTGTTTCTGATTTGGAGGGGAGAAGAGATTTTGCTAGG  
 AAGGTATGGAAGTAGAAGACAATGCAGTGAGAAGTTTCTGTGGAACTC  
 TATGTCTGAAGACTGCTACATGATTTTTTTTTGGCATATCACTTCCTCTAT  
 GCGAATTGCATCTCATGTATGAGATGGAAGGAATGATAATGACTCATAGA  
 ACTATTGACAGGATCATAGGAGATAATGTCTCTAAAGGGCCAAATGCAAT  
 GTCTGGAGCACAGTAAACTGAAAAATTTGTTCCATAAAGTTCCTTCAGAA  
 AACTCCCCATATGTCTGGAATAAAATGAAGGAAGAGGAATTTTTGCATTA  
 CTTTCTCACTGTCTATTTTTGGTTAAAAATTTAAGTAGGAAACAGCATGGAC  
 TTAGGTGGCGGTAATGTAGTTGTGATATCAGGAATTTCTGTGCTCAAAGA  
 CTAAGAAGAACAAAGAAGGGGAAACAGAAAATGGCCCAGATCAGCTCTAG  
 AGAGAAAACAATCTTCCTGCCATTGGAAATTCCCAGAGTTTGCAAGAACT  
 GGTGGCACTCTGTATCTGTAAATCCAGTCAAAGGAACAAATAAGCACTCT  
 AGTCGATGAGTTATTATCCAGTGCCTTCAGTACATAGGATGGAGGTCATA  
 GCAATAGGAAGATGTTTAGACAGTTCTTTAGAACAGAAGAACGAGAGGGT  
 GGGGACATAGGTAAAACCTCTTAGAACGGGATCTAGCTTTCTGCATTTAAC  
 ATTGATCAAAACTTTCCATGAATGAGGGCATCCCAGGTGGCTCAGCGGTT  
 GAAGCCACCTTCAACCCAGGGCGTGATCCTGGAGACCAGTGATCGAGTCC  
 CGTGTCAGGTTCCCTGCATGGAGCCTGCTTCTCTCTCTGCCCCACCCCTT  
 GTGTGTGTGTGTGTGTGTGTGTGTGTGTCTCCCATGAATAAAATAAAATAAA  
 ATCTTTAAAAAAATGAATTGTTACATTGAATGAATTGTTACATGAAGCAT  
 ATGTCTTAAAGGTGGTGAACAGTTAGAAAGACAGGCATCTCTGCTCCAC  
 TCTGGTCCCATAAATCTTGACTATACAGTTGTAAGAGAATATTATTTTTT  
 ATATAGAGAATACCCCTTGCCAAGACAATTTAGTAAGACAACCTTTAGAT  
 TAAAGAAATATATGATTATTCTTCTCTCTCAATAACTGTAAGAGATCTT  
 ATAAACCTTGTATGAATGCATTTTTTCTACTCGGCTTCATAGATCACCAA  
 ATAATATGCTTCAACTACAGATGGCAGTAAGTTTGATTTTAAACAAAGAA  
 GATTTAGATAAAATTTCAAGGTCTGCATAAAAATTTTTTTAGAAATATTCAT  
 GAATTCTGATCTCACGCGTTTTTCAACAATAACACTTTTGATTTTAAAC  
 AATTTGATCACCTTTACAGTAATGATTAATCTCTATAATAATAAATACTT  
 TATTTAAATTTGCACATAGGATTTAAATTTTTATGACTTATATAAGACTA  
 TTGACAACATCTCAATCCACATTTTTTGACTTATGCTTGTGGAGACCCAAG  
 AAATAATCTACATCGTAATTCGCAACTGATTTTTTAGTCTTAAAAATAAA  
 ACCCTAAATATATCAGTATCTCTTTCTCTAACAAATGATGATACTTATAT  
 ATGATATGGTAATTAGGTATAGCTTCAAGCATATCTGTCTTGGTAAATGA  
 AAGAAACATGAGTAAACATTGATCATATGGCAGATAAACAACCTTACAGAC  
 ATAAATAGATTTTTGTATTCTCAGTTTGTTCTGTTTCGTTGCATGTGAG  
 TTAAGTGGGGGGATCAAAAAATAAAAAAGAGATGTAAAAATTAGTCCCTCA  
 GCCCAAGATTTCTGATTACTGAAAGAGTTTGATTAGTTTAAAGAAATTTT  
 GCACTGATGCAAGAGGCACATTATAACTAACTTTTTAAATTTCTTTACTGT  
 TAAAATACAAGTGCTCTATAAATGGCCACCGCTGTGTTGTAACATTGAA  
 GCATGACGAATACATCCAGGTTTCAGGTCTTCTCTGCATATTTAATACGTTA  
 AGTACCATTAAAGAAACACTTTATAAAAAAACTGTTTTCGAAGAGTTGATTA  
 TAAATTAAAAATATTAACAGCCCACTAAGGGATCCAATATAGGGACTTACAT  
 GATCATGTCTGTTCTTTAAATAAAGAAATAAATTGAAGTATTATAATATT  
 TCATGTGTTTTGATGTAAACAATGACTTCATGGGATCAAGCAGGAACCA  
 AGCTAATTTCCCATCAATTGCAGTGTGCAAGATTGTCCTACTGTAATATT  
 TTGGTTTTAGGGCATTAGGACTTATTTCTAGCAGAATGCTGGAGGAGAAC  
 TATTCAGTTCTGACATGGTCATTCAATTCCTGTCTCAGGACCTAGGTACAT  
 TTTAATAGATGGGATGAGAGAGAAAGGGCTGTTTTGTCTCTCAAAGAATT  
 GCTAAACCAGATGTTGAGCAGGGAGGAGAGATTTTCAAATTCTAGCCGAA  
 AAGCACCATCCAAAGAATTAAAAAACTGACAGCCAATCGGTAAACAATGCCT  
 CCAGCCAGATAGCATTGAGCCTTCAGAGTCCACCTCTGGTCACTTCTTTTT  
 CTCCTCAGTGAGGTGACTTTTTCCAGGTCACTTCTTATTGTATATTTGTG

AGGATTTGTGCTAGAAAGCGTGCAGACCACCGTCTGCTCCGCAGATCAAAG  
GCATCCATCTCCAAAGTTCCTCATCGAAACAAGGGTCAATGTTGCGAAAC  
TTCATTCCCTGAAAACCACTCAAAAAATGAATTGCAGACACTGATGAGTT  
TTAATTCTTAAAAGAATCTGGTCTCTAGGATAGTTAGCTAAAGAAAGGAA  
AATACAGTAATACCCTGCGATTATAATCAATCAGCCTAGATTACCATATT  
TTCTATCTGGTTCCTCAGAGAGGAAAAAAGAAAGTGATGTTGCCACACTT  
CAACGGCATTGTGTTAACAGTCTTTCATTCTGTCCCAGCAAGCAAAAGCT  
TTTGATAAATGTTATCAATTTTATTTACATATAAATAGATGGTGATACAA  
GTCTAAGCTTATTTTCAAGACATAAAGCTGTGTTTCTGAATGAAATTTGC  
CTTTTAGGAGGTGAGGCGGTCTTCCCTGAACCTCAAGATTCTTCACACTA  
TGTTGTCTCAGAGGATTTATAGCAAGAGCTGAAAATACCAAAAACGAAG  
AAACTGAACCCCAAATTTTCTGATTCTCAGGATGGGAAGGCATTTGAAGT  
TTCACAGTGATCCAACAGAGGGCAGTGGAATTCCACAGAAGAATCTGATG  
GCCCTGTGCTGAAAAATAGATCCCCAGAATGTAAATCTCTGAAGAGAAAT  
CTGTTTTAACACAGCTACCTCAGGAAAAGGGGAATTATTGCACTTAATTA  
AAGTGATTGACACCATATGTGGCCCCACCTCTCCACCTCTACTTTTTGG  
ATTCATTAATGATTAAAAAAAAAAAAAAAAAATCAGACCCTAGTAAGGCCAGT  
ATTCCTGCAGCGTCTGTGACTTAACCCCTAAAACATTAATCCTATAAAAA  
TTAGGCTTAAACAAAAGCTAGTTAGCAAACAGAAGCCTTTCAGATGAGA  
CAATTTATGTTTATTATCTCTGTAACCTCGGAGAACTTCACTGGGCTGCT  
TTTAAATATTGTTCTTTTAAATGACCATTTGTATGTTCTTCTGTAATATA  
TTAATTTCAAACACAGAAAAGCTCCCAGTATTTTTTGCCCATATACTGAA  
TATAAAAATTTGAATATTCTACTCCATGTAAATAGAAATAGACATAACCA  
TTTTACCTGTCTGATTCTCCGTATACCTGAAATTCCTTGATCTTTGAGGA  
GAATACAGTCATTTCCTGTTGAAAATGAAACCTTTTTGTTATGACTTGGAC  
ACCAATTAAAAAATTAATCCAACCTAAACTCTTTGAAAACAGAGAATATA  
CCAAAGCATCCGATTTTCAAAGCGTTTTTAAGACTTCCTCTTCTCTAGTC  
TCTTCGTGATCACTTTTCTTGTGATCAAATTGAGTTTTTACTTTTATAC  
TCTTCAAAGCACACACGCTTAGAGGTAGAAGCACATATTACTTTAACATT  
TCAATTTGTTCCCTGAATTAACATCTCAAATCTAGATTTTTCCAGGTTTTA  
ATTCTGTTATAAATAGATTGGGTTTTTTTTTCTTCATAATTTTTAAGATT  
ATAGCATTTTACCTAAAACATCCATTAAGTTCTGATTATAAAATAGTCAA  
CAATAATTGCAGAGCATTTAGAGAATATAGACACCAATATAAAATCAAAT  
TAAAATTGCCCATACTTCTATCTCCCAGGGATATGCCATCAGAGTGATAA  
TGCTTTCCTATCCCATTTTTTTTCACACAGGTGGAACATAAATACACATTT  
CACATGATGTGATGTGATTTTTTACATATATATCAATATATATTTTACA  
TACGTATGTGCATATATACACACATACATGTGCTTTTACGTTTAGAACTA  
TCATCTGTGGAATATATTTAATAACATTGGATTATACCAACTATAGAAT  
TTTTTAAGTTTTCCTACCTCACCTAATATGCTTCGAAGACTTCCCCAGATC  
TTTACTTTCTGGCTGTGATTTTAAATAACTACTATCACATCATATGGACT  
TAGCTTATTTACCTCCTTTTCTTTGTAGATCATTGATTATCTGACACTT  
CAGTATATTGATTCCAAAGTCAAAAAAGATTTTACAATTCCAAGTCTTTT  
GAATTGAAAGTTCTGTATCTTTTTTTTTTAGTTCTGTATCTTTTAAATTA  
GATTCATTACAAGTCCAAATAAATAGTGACTGCAATAAAAAAACTAAAAGA  
TAAGGAAAATTTTGCATGTTTTTAGGGATGAAATAAATACTTTTAAAGACT  
ATTTTAAAAACACGAATAAAGAAAAGTGAAGTTTGTATCTTTCCCTTCAT  
ATAAATATTTGTACAGATGAATGCATTTTTTGTGCATAATGAAATTATTT  
TGACCCTTTTTTGTTAAGGAAAGATAGAATACATGCCATTTTTATCAATAT  
TCATTACCCGCAACTATCCTGAAATACTATTTCTGTGACGGTACAAAGCT  
CAAGTGAGAGATCAGATATTTTATTATGTTATTCAAATCATACTCCTAA  
TAACATAAATTTGAATGCTATGTACATAATACTTAAATCTTAATGAAGTT  
GGGGGAAGCTCATATTAAGAGAAAAGTGCTGTTGGTGAAAAGAGCTGTTTC  
CCCCACCTCACTTTCCAGAAATCCTAGTTTTTCAAAAAAACTGTGTGCTGA  
ATCACTTTTATACAATAATATAAAAACTTTTGTACTGCTTGTAAAATAAC  
TGTATACCTTACCCTCTGCAGAATGAATACAGAATTCATTTTCATGTAGTA  
GTAGCCGTTACAAATTTTTTGAATACTTAGTTTCATGGAGGTGTATATCTA  
TATAAAGATCTATTTTCTGTAGGTTTTCTATACCTTGCAGTTTTAAGAGG  
CCTTTTATGATTTGGGGAGCATGCAGAGAATGTTGAGGGAATTTGGATTTC

TAGCATTAGGTATGAGAAAACCTTAGAATTAGCTGAAATGCTGATAAAATA  
ATGTAGTTATTCTATTCCAGAGCAAGCTGAGAACCGAATACTGTTTTTTG  
ATGCAAATTCAAATGTCCATTCCATCAGAACATAATCATATGTTCTCTTA  
AAAATAATAATGTGTTCCCTTTAACCTTCTGAGGTCTTCTCATATGTGCAA  
TTGCATAACTATGCTTAATATAAAAAGTATAATATATACATATACATACAT  
TTAGAGAGAAATTTAGAGTACAAGGAGAGTATACAGAGAGTGTATACAAA  
TAAAAACACCTGATTATATATGCACTGAACTATTTTCAGCTCATAATTTG  
AAAAGGAAAAAGAAATAGCAAGTTGAAGAATCCTACATTTCTTTACACT  
CCGGCCTATGGATTTTTTTTTTTTTTAATTTTTATTTTTTTAAACAAAGAA  
ACATTTTCAGCCTTAATCATACTCTGAGTAAATGAAAGCGTTCCTGCATG  
TTTGAATTTTCGAGGTTTTGTATTTTCACTGGGAGTCAGGCTTTCACAG  
TTTTTTAACTACCTTAAAACCTTGTTAACTTTTCAGCTGAAATTGCTGTTT  
AACAAATGTTATGTCCTTGTGGGAATACAGGATCTTACAAAAACAGTGTT  
GAGGAACCTCTAGTCCCAGAGCAATCTAAATCTCAACCTGGGTGTAAGCAA  
TGGTAGCTGGTGGCAGGACCTCCAACCTGAAGGGCCATCGATGTTTAAAG  
ACACAAGGATACACTGGAATGAAGATCTCTCAAGAATAAGAATTGGTGTA  
TGGAAATGCTTTACTGGTGGACAGTGACAGGGACCAGGTCTCCTGCTGCT  
GATCGCGGGGTACACCAGATGATGCTCAGGACCCCTTTCCATGCTGAGGA  
AGGGGTAGCAAACTTTCTGGTGACTTCTGGGTAGCCTGGGCTCTCCATC  
TGCCCCCACCTGGTGCTTCCCTGGATAGCAGCGAGTAAGAGAGAGTCCCG  
GGCTGAGATAGAGTCAGCCCGCAGCTGGGAGCTAAGTTCCAGTGTTGAAG  
GCTTTAATTCTAAGTGAAAATGAAAAGCCAAGCTGGGAACCACCTGAAGA  
TTTCAACAGTCCATGGGTAAGGAAAGAGCTCAGGATATTTTTCTTTGAAG  
TCCACCAAAGGGAGACCAAAAAGAGCGTGAAGACTGGATAGGAATCAGAA  
CAATTAAGGATTTGTGATCAGGGATTTAGATCCCTGGTATAAAATATCCT  
ACACTATGAGGATGTTGTTCATAGTTTAAACAAATGTGTTATGTTCTTTC  
CTTCTGAGCGTTGGTTCTAAAGCAGTGGTTCTCAAACCGGGGTGAGTTTG  
CTCCCAAGTGACAGCTGGAAATGTTGGGAGACGTTTTGGTTGTCACATCC  
AGGAGAAAGGATGCTCCTGGTATCTAGAGGGCGGAGGCCAAAAGGATTGC  
TCCAAAGCAGCCTGCAATGAACGGGACAGCCCTTCGTAACAAAGAATTAT  
CCCACCTCAGATGTCACTGTACCAAAGTTGAGAAATCCTGTTGTAGATCA  
CAGGACTGATGTCTTTTGACATCAGATCATAGGACCGTGCTACTAATGA  
AATGCAGCTAATCGATCTTAAAAATTACGTCTAAATGGAACATATGTGGCC  
TCCAATCAACATGCTGTACTGGCACACCGATTTCCTGCGTTGGTCATATTC  
GTGTGGTTTTTCACGATTTTATTATTTCACTTAAAATGTGCGCCTCAAAGAG  
AAAACGTGCATCTAGAGGGTCTAGAATGCAAATGGCCCTAAACAATAAAT  
GAAACGAAATAAAAGAGACCTTTCAAATTAAGTAAGGGAGGAGGAAAAAA  
AAAAAAACAAGAGAAAAAGCTGTAGAAATAAAAAGTAAGTGTGCCTGGTA  
ATGTAATAAAGTGTTGTATTTTTGTAAGGCACATATTGAACTATAAAAGA  
AAAAGGCATTGGGTTTCGTCCGAATTGTGCTGTATTCTCATCACAGGCTC  
TCCCTCCTCGAGAGCTTTCTAGACCTCTCTGAAACAGACATTGTGGGGT  
GTGAACTGTCAAACGGAGACAAAAGGCTTCCAAGGGGCTAGTGTTCAT  
TAGAAGGCACTTGCTTTCCATCTCAAACCAAGCGTGCATGTGATGAAGT  
CTGTTTTTTCTAAACTTTGGCAGCAGCTGACCAGTAAAAATTTGGGCTTTG  
CCGGAAGTCTTAGCTACAGCAGTGGCAAGGGTTAATATTAAACCCACCAC  
ACCATTTTGCACAATCTCCCAGGAGATCTCTCAATGGATTTCCACTGCCA  
CTGGAAATAATGGCTCACAGCTGCAGCAACCCGTGGTAACACTTGATATT  
CCCGTCGCAAGCGGGGCCAGTGCTTTTCAGTGGAATGAGAAAATCACTAAC  
GCTATGCTGTACATTGTGCGGGGGTTCAGGGTTCCAAAGCCACAACCTTC  
ACTGACCCCTCAGCCCAACAGCCTCCCCCCCCCAACCTGCCCCAGGCTG  
CCTCTGGCTGGGTCCCTTATCTCCTCGTTTTATGAGAAGCACACATTTGC  
GGGCATGAGCCCAGGGAGAGCCAATGAAGAGCCACAGGGAGACTGAGATC  
TCCGTGGGAAAGGGAATTGATTTGTTTTGCACAGAGTAATTGTCATCTAC  
TTAGAGAGAATCTGGGGTTATTCTTTCAAACCTGAGAAATGAGAGGCCAA  
AGGTGTTATGTGATTTAAATGTGGTGAAATGTTTTTTATTCCTTCCCCCA  
AACCATCTAATCTCTCCAAGCCATGGTGTCCAGTGCTAGAAGGCCATCG  
TGAGAGATGCCATGCTCTTGGCATAAACTTTGAATGGCAGAGATGATTG  
GTGAAAAATGGAACCACCTCCAGAGAAATATGATGAACCATTATGAAGAG

CAGTCCTCAAGCAGGGCAGCCCCAGAGATTGGGATGCTCTTTGTACATCT  
TCCCCAATCCCCATCCTCTGATAAATCAACCCTCACTCAATCAGGCCTCC  
ATTCAGTACTCACTCTCGTGTGCCAACTTGTGCCATGCACAGGACAAA  
GCACGTGGCTGGTATCATTCTCTGCGCAATGTTCTCATTACAGGGCCTGG  
TCTGCAGCCACCCCTCAGGCCCTCCAGATACAGCAGTGATTTAAAGGGA  
TCCCAGTCTTCATCTCCCTGCCCTGTGAATTGTGAACCAATTAAATGCTT  
TATTTTTACCGGTTGTATGGGGTGTGATGAAATACCATGCATGGTGCAGG  
TATGGACATGCATGCACATGTATGTCTGTAAGGGAGCTTTGTGAGCCTTT  
CCAGGAATCCCAACAATCCTCTGCAAAGCTGAAAATTGGCTGTGACAGTAT  
TTTAAAGAATCAGAAAGCTCGGGAGCTACTCGATGATGTCATGGAGGTCC  
CTTGAGAAAATGTGGTCATTAAGTGAGTTGCATGTGGTGATAAGAAGCCA  
TTAAAATAAACAGAACTTCTCTATAATTACTAAATTTCCCAGAAAAACAA  
TTAGAGTGCTTGAGACATTTTTGTGTCTGTCTTCCACTGAGTTCAAAGTTT  
CCGCTCCCACCCGCCCCCCCAACACACACACCATTTTCCAAAAAGTGCTC  
GCTGAAATTGTGCAGCATAGCCAGAAGAGAAAAGAATTGGAGGCCCTCT  
GGAGTATTTGACAGAAATTTTTGTGTGTTTAAATTTTCTTTTAAACAGTG  
GGGAGCTCTGAAACAAAATGGAAGAAATGGACTTTTTCTATGTGAAAAAC  
AATCACTTGCAAGTCATTTTGCATGATGTTAAGTTCTGAGGGGTGTAATA  
ATTAACACAGCAGCCTTCTATTAGTCGATCATATACATGGGTGTGTTCTA  
TGCCTTATATACACCTTATATGTACCTTATAAACATATTACGTGCCTGAG  
CACAAACACGTTCAATTGATAATACTAACTATCATAATTTATTCTCTTA  
CTTCTTTCTTAAAAGCCATGCTATTAGCACCTGGAATCCCAGGATTGGG  
AATACATTTTCTGTCCATCAGATTCTTTTTTTTTTTTTTAAAGATTTTATG  
TATTTATTCATGAGAGACAAAGAGAGAGAGGCAGAGACACAGGCAGAGGG  
AGAAGCAGGCTTCCTGCAAGGGACCCGAGGTGAGATTCGATCCCAGGACC  
CTGGGATCATGACCTGAGCCAAAGGCAGATGCTCAACCACTGAGCCACCC  
AGGCACTCCTAGGCCATCAGATTCTTATTAATAATTGAAATGATAAACG  
TGAAAGCTTTCCTGGAGCATATTTTCATGCAAATAAATAAACGAAGA  
AACTCCATGGATTAAATTTCCATCTTCACGTCTAAGACTAAAATGGAAG  
CTGAAGAAGAGGAAGGAGAAGGTTAGGAAGGAGAAAGGGACCAAAGGGTG  
GGTAAGGTAGGGCACAAAAGCCAGGGACAATCTCCATGGACTGCACATGT  
TGGCGGGCGCTGGTCCCACCTAAGTGACTGATGGCATCCTGTATCAGGAC  
ATAATGTATCCCTGGACCTGAAGCTAACATTTTTTTGTGAATTAAATCCT  
CTTTTTTTTACGTACATAATCACTTCAGAGAAGCTTTATTTTACCTTA  
AAGGATAACAAAATATGAAATTATGTCAGTTTGAGGTGCATTGCAGGCTC  
TCACTCATCCAATGGCTTGGCCACTTTATCAGAGATTTATTTATTTATTT  
GAGAGGGGAGGGGCAGAGGGAGAGGAAGAGAGAAGATCTCAAGCAGACTC  
CCCACTCAGCAGGGAGCTGGATGTGGAGTTCCATCCCATGACCCTGAGAT  
TACGACCTCACGACCGAAACCAAGAATCAGAGGCTTAACCAATTGAAGCC  
CCCTGGGCACTCCTGGCTATTTTTTATTATTTTCAAGATGACCTGTTTCAAG  
AGTCTCAGCAGACAACTGCAGTCCCTCCCATCTCCCTAAAACATTTAAC  
TTTTCTTTCTTTGTCTTGAATAGCATCTAGTCCTTATTGCGATCCTAGC  
ATACATTTCCATGTAGATTAATTTCTACTTACATGTGTCTTGCCTTTGCG  
TCTAGAGTATATGCTAGAAGACAGAGGTGAGGTTGTATTCATCAAAACAG  
CATCAGGATCCCAAATTTTATTTGGGAAGACACCCAATAAAATTATGTGG  
AAGGAATAAGCAAAAGAATGAATAAATGGGTCATTTCACTGTGATTTGTG  
GAATGCATGGGCTTGCAGAATGCCTGACTAGGAACGAGATTTGCTTATGC  
TTTCCCAGCATATGTGGCATTGTGAGAGACATGCCTCTAGCACATCGTACA  
TCTCTTAGAATACAGAAGATGGAAGAGATGACTGTTCTCCTAGGATGTCTG  
GAGAGGAATGTCTGTAAAGCTCTCATTTTTATAAATAATCTACCAAATTTA  
AACCTTGTTCAAATGTTTATAACAGAGAACATGTTTTTAGTGGTTGCAAG  
AGAGCAATGACCTCTAGCATCTATTAATAGTCTGCCAACTTTTGGTTACT  
AAATTTATCATAAGGGATAAATGTTATTTTTCTGCACCATATAGAATTTTC  
TGTGAGAACTGAACTAAATTTAGACAAATAACATACAGATTATGCGTAG  
GCTTCACTCATATGGGTATAAAAAATAAATATCATGTGTGCATATAGTCAC  
GTACTTAATATCAGATTTTTTTTTATGTGGATAGACTTCTATTATTTTAC  
TAATGGAGCAGAAGCGGAGATAATTTAAAACGATCCATGAGGGGATCCC  
TGGGTGGCTCAGTGGTTGAGCATCTGTTTCATCCCAGATCGTGATCCTGGG

GTCTTGGCATTGAGTCCCACGTCGGGCTCCCCGCACGGAGCCTGCTTCTC  
CCTCTGCCTGTGTCTCTGCCTCTCTCTGTGTCTCTCATGAATAAATAA  
ATAAATAATCTTAAAAAAAACAATCCATGATGTTCTTTGGAATGCATTT  
TTAAGCCTTTGTTTTTATATGTTTGTGTTACTTCTGAAACCAATTTTAAA  
CAGAGTGCTGAAGTCACACTGAGGACATCATTCCATCCAGGTAAGGCTAA  
TACATATAAACTCCCTGCACCCCTGCCTCTAAATATCTCAGCATGCTCTA  
AGTTGGGAATGGGGAGAATCTTTTCCCTTGGAATATTACACAGCATCA  
AATAATGACTCAAATTCTTTTAGGATTAGGAAGTTAATAGAAAAAGGTC  
TTGGTTTTATGGGAATGCCATAGTTAGTTAAAACAGGACCAAGTGAAGTA  
TAAAGAGATGTTGACAAAATCGAGTCGTAGAGAAGGCACATTATTACTTG  
TATTCTCTGTCCCTTGCTAATCTCCTTGGTCTGAAAGCAGCTGTGGACCT  
CCCCTGGGAACAGGCAATGCTGACTGGCAGCTGGTAAGCACCTGTTGGGT  
TGTGCTGGTGGTTATGGCTGGTGTTCCTTTTGATTGGACAGGGCATCTGT  
TTCTGATTGGTTGTTGCCCATGCTCTCCCGGTCATTATGTATCTTCAACA  
TCAGCCCTGGGAATAGGTAACCGAGCTGTACTCTTGATACTTGTACATTT  
GGCTCATGTACCGAAGAAGGTTATCTTTGTGCGGAATTTGAATGAGTGAAG  
GTATGTCTAGTCAATTCAAGGATGGGGGGTGGGGTGGGGAATGGTTCAAA  
GCACTGCAAAATAGGTGAGGGGTATACGTTTCAGAATACTTTTAAGGAAA  
AATAGAATGGCAAGCCACAGAAATTACTGATTAGCAATTTTATAAGTAGG  
TCAGGTGAAGAATCCATGCATATGACTCATGGGCAAGGTGATGCTGTAA  
TGACTTAGAAAATAATGATCCCAACAGGAGGTTAATATACTTATTTAGC  
TATGACCTTTCCCTTTGTAAAATGCATCCTTCCCTTTCCATAGGTAGTGTA  
GAGACATTTTATCGCCATCAATATTTCCAAAGAGTAAAAACAAGTGGAGTA  
AGAATTAATGAGACTTCTTTCTATTTTTACTTCCTACTCTTGTGAGAAAT  
AGAAAATCAGGGAAAACAGAGAGGCATGAAGCTCCAGGAGAAAGAGTGGT  
GATAGCTCTGCATAGAACTGAATCCACCTCTACCCGACGTTAGACATTCA  
CTTGAACAAATAAACGAATAATGGCACTTCACAACTATTTTAAAAAAA  
AGTCAGACTGTGAAGGTATGCTTAGTGGCTAGACACAGCTGGAATAATT  
GGGAAACAGAGTCCAGTGCAAAAGAGTTTAAAAACCACATGGTCTCAATG  
ATATTTTCATAGTGCTCCAAGCAATTTCTTCCACAAGTCAAATGGTTTC  
AAGACTCTCCAGCTCAAAATTACCTACAAAACATAAATGCCAAAAAAGG  
TAACTGCAATGCATTATGGACAAAACAACCAGTAACCTTGAGGAAATT  
CCTTGTCAAAATTGTGAATGGGACACTTCGTGGCATAGGCAGCCATTGCC  
CTGCCTTTAATACAACTGTCTGGTGTCCCTCGTCTACTCTGGGGAAGAGA  
AGAAGTAATGATTCCCACACGCTGCTGCGAGATACACTGGAGTCACCTGC  
GTCTGTTTATTTCTGTGGGTGGTGGTGGCGAGGAGATCTGGAACAAGCCC  
ATGAGAATGTACGCATAAGTGACTGTTTACTGTGAAAGCACTTTGCCTCC  
ATAGGCAAAGCTTTACTTTTCAAGGTGACTTTGTGAGTTAATTGATAAGTGA  
CTCACAGCAGGGCTTAGAACACCTTCCCCAATATTACAGTCAAAGTCACC  
ATCAACATAGAGAGATCATGAACACCTAAATACCAGAAGTCAAAAATCCC  
ACACCTAATTTGTGTCTCTAATCTTGCTCATCATTGATAGGGAAAGGATT  
ACTGTTTAATTATATTCTTCAAGGGGGCATGATGCCACAAATTTCTTACTT  
TTAAATCTTCTAATCATGAAACAGGATGCTATCCCATGATAATGTCATCC  
AGTGATAGACATTTTTTTTTCTAGCCAATTAAACATATTAGCAGCTGTTT  
AGTTAACACACTGCATGCAAGGAACCTTCCAAGCATTTTACATATATAA  
ACTTCATTTACACGTTGTAAAATAATTTATTATCCTCGCATGCCAGCTGA  
GAAGACTAAGGTTCAAGGACAATAAGTAAATAGCACAAAGACAGTGAAATT  
TGTCATGGGTTGGGCTAGGATTCCATTCTCTTTTCCAATGCGTGAAAAA  
CAGACACATCAGGAAAAAGTAAAGCTAGTACAGGAGTTAATTATTTCTCA  
ACATAAAACAACAACAGATTCCATTGTTACAAACTCTTTTCATTTCATCT  
CCATGAAGGTCAAATACAAAATCCTAAATAACTCCCAAATTAATATGGCT  
TCAGATTTTGCTATGATGGAACAGGTGTGGGATTTGGGACTCGATCCAA  
AGATATTGGTAACATAACTATCAGAGGAGATAAAAAATCCAAGACTCCCA  
GAATCTACTAGTGGATCTTTCAAATGTGTAAGGTGGTGGCAAAGCTTAGC  
GGTAGCACAAATGAATACACCCAGAAAGGTCTCTACAATTTCTTCCACTA  
TGCAGATGCTACATGAAGAGCATTTTTAGGTCTCTTTCCAGGAGCCTATA  
TGCTTCTATGCACTCATAATCCAATTACTTTACTTTTTAATGATAAATAA  
AAGAGGTTTTAACTTCACACACACACACACACACAAAGTTTTTTCTCTGC

ATTCTTAATACTTTAGATAAGAATGACATTGTATAGGAGCTGGCAACTGC  
AGACCGCAGGCCAGATTGACCCCTTGTCTGCTTTTGTAAATAAAGTTTTTA  
TTGGAAAACAGCTAGGCTCATTCTTTAGCAGTCATCCACGGCTGCTTTC  
AGTGCGCAACAGCAGAGTTGAGTAGTTTCAACAGAGACTGGCTGCAGAGC  
CAAAAATATTTACTGTCTGGTGCTATCCAGAAAAAGTTTGCCACCTTCTG  
ACCTAGACGATTGTGGCATATGTTTAAAAAAAAAAAAAAAAAAGAGGAG  
GTGGAGGAGGAGGAAAGTCAAGACTACTGAGGCCATAGCAGACAAAGGGA  
GACTGAGTTGAAATTTTCATGCTCCTTTCCAGACAGTGCCCTGGGTCCCAG  
TGGTGTGCCATCTGTCATTGTACCATCATGATCATTATTGCAGAGGACAC  
CTATTTGGCCTAATTGCAGTAATGCCACAGACAGAATTTGCAGAAAAAAG  
AAAAGTTGCCAGAGCCTGTTAGTTTGAGATAACATTTTATTGAATCCTCA  
CCCTATTACAGAATTTTCAGTCCCCGCTTCATCTCTGCCCCAAAGCCCAAC  
TCCTCCAGTGTTTTTAATAAGAGGTAATTATTTTTGTAGGGTTTTAAACA  
AATCTCAGTGGAATTCAAATATTTTTTCAGAACTGTCATAGGAGGTATATT  
TTAGGGTAGAATCAGTGTTGAGTTAGCTATTTTCACACACCACAAAAGATG  
TTAAACTGATTGAAATCATGAGAGAAAAATCACTAGTAGACACATAAGCA  
GTTTCATGCAGTCATCATCTCTCACCAGAAACACAGTACAGAAAGGTTAAA  
TGATAGGAGGATTTGGGATGCTTCTCTCTAGCTGTGGATATGAATTAGA  
ACTCTTGATGAGGAATAAAAATAGACTGGAAATCCTTAAAATCAAAGTGA  
AAAGCATGGTCTAGAATCCCGTAGACTCTTACTAATCAATGCCAGCAGGT  
AGTTCAATCTTCTAATATTTTAACTACTACATAGCTCAGAAAAATTCTTG  
GGGAATGATACAATTATATCATACCTAGTCACATAACCAATTTTGTTTTCC  
ACATACATTAAAACCTTTGTATGGCTCAAATCACATTCCCTCAATCTATAGA  
CAATATAAATATTTGATATAACATGGCTTGGTCTGTTAAAAAGATACCAA  
ACTTGTCTCTGATAGAAGTAAAAGAAATCCTGCATCATATGTATAAGGTA  
ATGGGTGGTATATCTACAATTGCTTCTCTGCTATATGATCACTATCTTTA  
TATAACCTGGCTACCCCAATGTTGATTTTTTTTAAACAAGAGGACTGTACT  
GAAAGTGATACATTGTATCACTCAAGACATTGAGCAGAAAAATAATATAC  
TTTCAGATTGTCTTCTTGAACATTAATTCTTTCCTTCACATATTCAGGC  
AATAAACTATCTTAAGCATTGGTAAGATACACCAATAAGGCTGGCCTC  
TATTTTTTAAATTTGGTGTTACTAATAATATGAAATTGAATTCTCTTATT  
TTTCTGATAATGTTAAATTAATCTCCATGTCAGTCTATAAAAGTGCAAAAG  
TGAATAAATAAGAATGAATACTCTAATAAATGCTTATATTTAAGTACGAT  
GCTTCCATTCTTCTTAAGTACTAAATAAACAGTTTTTTTTTGGGGGGGG  
TGAGGTGGGGTCATAGAAAAAGAGATTGTGTCAACATTTTGTGTCTTCG  
GAGACACACTTGAAAACCTAACAAAAATTTTCAAACCTTGGTGTGAATAA  
GCACAATTTTAAAGTATGTCCATTTTCCAGAAACAAATATGATGAGTTTT  
GTGAGTCTTTGGTTAAATGTTTCATTGACCACCCAGACCAAAGGCATTTA  
TACAAATCTTCTAAGATACACCCATCCATTAAAAGGCCACAAAGCAAAAT  
GCCAAGCAGCACATCCCAGTCAGAGTGGATACAGCCATGTGCTAGAAATT  
ATTAGATGAATCGTCTATTTCTGGTTTTGTGAATGAGCTATTCTGTGTCT  
CAGATGCTCTGACTCTTAAAATAGGGAGTGAATTTCCACACCCACAACCT  
GGTTACCGTGCTGGTCTCTCTCTGTGACTAGATTCCATTCCCTGTCTT  
TTCTTCTTTCTGCATCGGATGCTTCTCTTGCAATAAATACTGCTTTACC  
TGGGCTCCTTGGATCTTTAGCTTCCGGTTGAGCTTGGTCAAGGGGAAGCA  
CTGACAGGAAAGATGACAGAAAGAAAGAGACAGAGATATTTATTTCTCTG  
GCTCTTCACAGTTGGGCTGTCATATTGGTGGTGCGTACGTCCCTTTACTT  
ATGGCCACAGCTTCTAAGGGACGGCCCTTGCTAGGGCTACATAGTGTTG  
CTCGTCAATGAGCATTTTACCATTCCTTGAAGACTCCTCTGGGTCTACTC  
ACATCTCTGTAAATAGGTGTTCTTTTTCTTCCAGATTTATTGAGGTAT  
AATTGACAAAATTGAGATGCCTGGGTGGCTCAGCGGTTGAGCATCTGCCT  
TTGGCCCAGGGCATGATCCTGGAATCCCAGGATCGAGTCCCATATTGGGC  
TCCCTGCATGGAGTCTGCTTCTCCCTCTGCCTCTCTCCCTCTCTCTCTCT  
CCCTCTCTCTCTCATGAATAAATAAATAACAATCTTTAAAAAAAATTGACA  
AAATTGTACATATTTAAGATGTGCAACATGATTATGTGACATATGTATAC  
ATTGTGAAATGATTGTAAACCATCAATTTTATGAAAACATTATCATCTT  
AGATAGTTACCTTTTTTTTGAATGGTGAGAACAAATTAAGATCTACTGTTT  
TAGTAAATTTCAATTATGATAGTCTTATTACCTATAGTTACCATGGTTTA

CATTAGATCCTCAAAACATATGTATCTTTTTTTTTTAAGATTTTATTTATT  
TATTCATGAGAGACAGAGAGAGAGAGAGAGAGAGAGAGAGAGAGAGGGGC  
AGAGACACAGGAAGAGGGGAGAAGCAGGCTCCATGCAGGGAGCCGGACGTG  
GGACTCAATCCCGGGTCTCCAGGATCAGGCCCTGGGCCAAAGGCAGCGCC  
AAACCGCTGAGCCACCAGGGCTGCCCCAAACATATGTATCTTATAACTGA  
AAGTTTGCACCCTTTGACCAACATTTCTCCATTTCCCTCATCCTACAACC  
CCTTACAGCCACTGTTAATATTCTCTGCCTCTGAGACTTTGATATTTTTTA  
GATTCCACAGATAAACGAAATCATAACAGTATTTGTCTTTCTGTCTCTGG  
TTTATTTCACTTAGCATAATGTCCTCCAGGTTTCATCCATATTGTTATGTA  
TGGTGGGATTTTCTTCTTTTTTCGGAGTTCAATAGTATTCCATTTTGTATA  
TATGCCACATTTTTTCATCCACTGATGGACACTTAGGTTTTTTTTTCCATAC  
TTAGCTATTATGAATAATGCTGCAGTGAATATGGGAGTGAGTGCAGACGT  
CTCTTTGAGATATTGATGTCATTTCCCTTTGTGTATACACCCAAAAAGTGA  
GATTGTTGGATCATATGGCAGTGTTGCCAAGGATGTGGGGAAAAGATAAT  
CCTTGTGTACCATTGGTAAGAAATGTGAATTGGTACAGCCATGATGGCAAA  
CAGTATGGTGATTCCCTCAAAAAATAAAAAATAGAAATTCCCTATGATCCA  
GCAATAGATATTTCTTTAATATTTCTTCACTTAATTGAGATTTTCGCTTC  
CTGTGAGAAATCTGCCTGAAAAGACTTTTCACCCCTTGATGATATATTACTG  
CAGATTGACAAACATACACAAAACCTAATTTGCTTTCAACAATTTATCACT  
GGGGCGCTGGTTGGCCAGTTGGTTAATGTCAGACTGTTGGTTTCGGCTC  
AGGTCATGATCTCAGGATCATGGGATCAAGTCTCACATCGGGTTCTGCAC  
TGAGTGTGGAGCTTGCTTAAGATTCTCTTCTTCTCCTTCTGCCCCCTTCCC  
TCTACTCATGCACACATACTCTTCTTAAAAAAGAAATCTATTTAAACC  
CCCCAAAAACAATTTATCACTAAGGATTAAATGTAAAAATAATAAATAG  
ATAGAAGAAATGTTCCGGTAAGCTTTTTTGGGAAATTAGTTAATAATGGA  
AACTGTGTTCACTGTTAGTAGGACTATTTTCATACAGGATGGTGGAGACTG  
GAGCACATTTTGAAGGCTTTCACCGAGGTTTCAGCATCTCGATTTCTAGC  
AAATCTGTTGAAAATGGAAGAGCCACAAAAAGTAGCAGCATAACACTATA  
ATCATGTTTTGAGTATTACATGCATGCAGGAATGAAAAGGAAGAACTGAC  
AATTATTGAGTGTTCACCATGACAACCACTGTATGAGTCACTTAAGCA  
TTATGTAATTTATGTAAATGTATGCAATCCTATTCTCAACTCTAGCAAGT  
ATTTATTATTAGATTACAGTACAAATGAGCAAATTGAATCTTACAAAA  
TTAAGCCATTGACAGCTGTTGCCCGTCAGAGCATCAACTGATTCCTTTGT  
CATTAGCTGGTATTTGCTCCTAATGTTACAGGTTACCTATAACTCAGGTT  
GTCAATATGTTTACTATGTCTCCTCATGCTGGCCTCACACACCTTTAAT  
ATCTGTTGGCATTCTCAAATATGTCTGTGATCCTTTGATATGTAGGAATT  
TTAGCTATGAGTTTCCCTCACCATCCACCTAGGTGCTCACCATTCTAC  
TCTGGCCAGATTACAACTTCGCTCCAGGGTGAAAGGTCTTTTCAGGAAG  
ATCTTAGAAAGCAAGGCCATGATTTTATTTGTTCTCAACCACAGATTTT  
AATCTGAATTTCAATCGAACGAGATTGAGGGTGATGGGACACTTTTCAGA  
GCATCACTGCATAGAAACCAACCATATTCTCTTAGATCCTCTTCAATGCA  
TGATCAGAGTTTTCTTTTGTAGGGACATGTTGTCATACTTTTCTTTTTTT  
TAATTTTAAAGGTAAGTACAACACTAGCTTTTGCTCTCAAAATGTATAGA  
ATAACTAGAAGACGTTTTGCTCTGTCAAGATCATACAACTCAGTCTCCTT  
TTTTACCTTATGGACATTGTTAAAATTATATTTTGAATTTAAAGCTGAG  
GAAGAATTTTTATTCTAGGCATTATTTTCTTTTTTCTTAAAGCTATTAA  
AGCCATCATATTAGTGAATCATGAGCCACTGAGAACCATTGAGAATTACC  
TGGAACAAATGCATTGCTTATTAATCAAGATATCCTCTCTATTCTACAT  
AAGTCTGTGGCCATGTCTACTTCACATATGTCTACATTTATGTTAACATA  
ACATCCACATGTGCATGAATTATGTATGTGTACGACCAGTGAATGGATT  
CTAATTTATTAAGAACAGTAGTGAATAATAGACTTGTCTATTAAAGAAC  
AGTAGTATAATAATAAACTTGTTGGTGGAATATACCCCATACAATTACA  
TCTGTGTTTTTCAGCCTTAGAAGACCCTGGCAGAGTCATGCAGTGATGCAT  
GTCAATATTTTTAAATAATACAAATTTTGAATGATAGCCATATAAATCAG  
TTTCACTAAAACTATGTCAATTGGGCAGTTTTTCTATAAACGTATTCTT  
CTATTTGCAGCATAAAAATAAACACTGTAAAACACTATTATAGATAGTTTG  
CTAGCTAGAGGTACACATTGAATGTGACTTGAATTCTTGGAACCAATGG  
AAATGTGATGCATAAAAAACTAAAGGTTCAAGAGTTGATAGTTTGGTAAC

ATAATGTTTGTCACTGTGGTAAGATTATATAAAAATCCATGCATCTATTTT  
GCATTTATTACATTAGTCACCCATCCCCTGCTAAAAATGAAGTGGTTGCA  
AATGGGCTTCATCAAATATTATACCTCCTGTTAGCCCTTGTCCCAACCTT  
AAAAAAGGCTGACTTAACCAATCAATTTGCAATTTTGCATTATTAAGAA  
CATATTCTCTTCATACCATTGAAAAAAGCATCTGTATATCATGTTCTCA  
TTCCAGAACATTGCCCCCTGGCCAAAGCTTTCTTCTTAACAACATAAAAAG  
TAAAAAATGCAGAAAACAGCTAGTCCCAGAAAATTCAGTTTAAATGCTCA  
GCATTCCCTTTAACAGAAATTGCAGGTAGAATTTTCATCTGTATTAGTCAGG  
GTTTTAGAATAGCAGGTAGGATGTGGATCTAACTGTCAAATTTCTATGAG  
TAATTTAATTGGCATTGGATAAATTTGGTTATATTTTTGACTGCTTGGTA  
TTTAAAGTTTCTTCTTTTTTTTTCTTCCCATTGTGTAGATGGCCCTGAATC  
TAAGAACCATTTAGTGTGGCAATTTTCTCCCCTGATGACCTAAGCCCCG  
TGTCTCCCTCAACAACCTCCTGCTTTTAAAACTATGGTATATTTCTGGTT  
ACATATGATGAATTGAACACACACATTTATATTTTCTTCTTCTCAAACCTA  
CACAAATCAAAGTAAATGTATAAAAAAGAAATAAACTGTGGAGGCTACCT  
TACATAGCTTATGATGATCCCTGCCTCTTGGTATTCACAACTTCTGTAGT  
CTCTGCATATTTTACCAAGGTTGGTCTGTTTGACCAGTATCATAGGGCAG  
AGGTGTTACTTTTGAAATTAGGTTATAAAAAATATAAGGTTTCTTTTTCTC  
TCTCTCTTACCTCTCATTGCAGGGGAAACAACTATTATATTGTGAGCCT  
CCTGGTGGAGAGATCCATATCCACACGGGGGGAATCTGAACTTCTGCTC  
AACAGTGAGAAAGGGGTCTGCCTCCAACCATATGAGTGATTTTGAAATGG  
GTTTTCCATCCTCATTTGAGCCTTTAGCTGGTGGCAGCCCCAGCAGAAAG  
CTTGATAGTAATCTCAGGAAAACCGCTAGGCTACTACTATCCAACCTAAGC  
CACACCCAGATACCCAAGCCTCAGAATCTCTGAGATATAATAAATATTTG  
TTATTTTTCATCAGTTGAGCTTTGGGTAATTTGTTACATGGCACTAAATAG  
CTAATGTATACATCTGCAATGAGAAAGAGATCATGAGTATATTCACCAGT  
TGTTAAAGAAATGAAGAAGGATGTGGATGTTTGACAGGAGAAGATGCCAAT  
GAAGAGCAACCCAACCTCATACCATAGAACCTTTGTAAAGACTCAGGAATTG  
GAGTCACAAAACATCAAAGAAAGTGACAGTAGGACAAGGGAGTAAAAACA  
GAAGAATTAAGTGCAAGTATATACAAGGAACAATCATATCTCAATATTAT  
ATCTGCTCCCTAAAAGAGAAAAGAAATATCTGTTCTTTGGAGAAAGCAAACC  
AAGAGAGCTCCAGACTGTGGGAACAGCCCTGATAGATGGTTAGTGGAGGA  
TGCTGATCTGAAAACAGGAGGTTTAGGTGAAAATTCATGCATAAGCTCAG  
GAGACATCAGCCTCCTTCTGACTTTCTACTCAAGCATATGTTATCCAGGG  
CAATCTACTTGCAAATACAGGCAAGTTTGTATTCTTTTCAGGAAAACACA  
CACACACACACACAGAAAAAGAGATAGAGAAAGAGAGATAGACAAATGCA  
TAAAGATTCTATTGTTTGGAGTCCCTTAACAAAACAGCAGAACTCTACCA  
GTTACCACAAAATAAAAACCCGTAGTTGATATAAGTCCCCGTCACAAACAT  
TGAACCTCCAATCAGTTTTTTGATGTTTCATCCTTAAACATAAATGGGAA  
GTCATTTTTTCATCAGACATTGGAAGAAAGCCTGAATACCTGAAACAGAAA  
GATTAAAAAATAATAACTAGAAGAGGGGAGGAAGGAGTCAGGGGGAATA  
ATGGACTTGATGGGATTAAGGAGTATACCTGTGATGCACGGGGCGATGGG  
TGGAAGTGTGCAATCACTATATTGTACACCTGAAACTAGTATTTCACTGT  
ATGTTAACTAATTGGGATTAAAAATAAAAACAAAAGGGATCCCTGGATGGC  
TCAGCAGTTTAGCGCCTGCCTTTGGCCCAGGGTGTGATCCTGGAGGCCTG  
GGATCGAGTCCCCTTCGGGATACCTGCATGGAGCCTGCTTCTCCCTCTG  
CCTGTGTCTCTGCCTCTCTGTCTTTATCTCTATCTTTGTCTCTCATGAAT  
AAATAAATAAAATCTAAAAAAAAGAAAAGAAATAACTGGACAAAAAACT  
AAAGGGCATTAGATAAAACTTTGAAAATGCCCTTATAAACTTAAGTCA  
ACAAGAGAATATAAAATATTGAATTTATACACAAGAATGGAATGTAAGAA  
ATAAATAAAAACAGAGTTTTTGCAACTAAAAAGATGAGAGCTACACTTTT  
TTAAAAAACATAGTTGGATGGGAAGATAATTCTGAGTCAAGTGTGATGAT  
AGTAGAACAAAAATTAAAAATGATCAGCAATAACAGAGGAAAAATAAGAA  
AATTAGAGAGTTGGTACATGAGATCCACTGTCTAGCTAATGAGTCTCATG  
AAAAAAAAAAAAAACCCAGCAATTTTCAGGGAAGTAAATTTATCAAAGATAT  
ATTACCCCAAAAAATGTTTACTAGAACAGAACTTGAAATTTTATATTAAA  
AGTGACCATCAAGTGACAAGCATAAAATGAGGCAAAAGGTACAATAAAAA  
GTCAAGGTGGTTGACAAATGCTTTCAAAGGAACTCAGATAAAGAGTTC

ATTGATACCTGATAGTTTTTATTTTTTTTCAAATGGTAAACCTTCTATT  
TATAGTAAATTACCTATTTTCTTACATAATTATGTTTAAATTATTATTTAT  
ATTTTCATTTTGTTTTAAATCATTTTCCTGACTTAGTCAACATGCCACTT  
TTCTTTAAAACCTAAGTAGCCACTATTTGTTTTGTTTAGTTTTGCTTCTG  
GTTTTGCCACCCATGTGTTGAACACAACCTGTTTCAGGGTCTAGCCGTATTT  
ACTTAGGTCCAGTTTTTTCATCAGCCAAGTGGTAAAAGTTATTTTCATATT  
GGGGAATCTTGGAATATACAACATTTGATGCAAAACATCCCTTCCCAC  
GCATTTATTTATGTATTTTTTTTCTTCCCTAAAGTATAGTACATGCCTAA  
TTGCCTTCTCCCATGTATTAATTTAATGAAATGCCTCTTTACAAGAATTG  
CTTGCTAATGATAGGATTTGAGTTGTGGCAGGCAATATTTAGGGTATTTA  
TTTTTAAATAGGGATGATATGTGTATTTATGGGCAATGGTCCCATTTCC  
CTTGAGAGCCATAGACATTTTTTTGAAGCTTATTTTCTTATAAGTATAAA  
CTTCTTCCCTGGGTATGGAGCCATTAAAAGTGAATCTAATTTCAACGCACA  
TTTAATATACCAATATTTGCATTCATAGTGGCCTATTTTTTACCAAAGA  
TTGGTAGTCAGTGTGGTTGGAATTTCTATAAGCTGTGAATGAGGTGGAGGG  
GAAAAAATATATACGTATTTATTTTACATATATAACTTTTGACGTGT  
TTATATTTAAAAATTTAATACTTTAAAAAGCCAGCACAGTCGTTTATACTT  
TTTTTAAAATAGTATAAAGAGCAGTGACAGTGACAAAAGTGTCTGTTTCTG  
CCTTGCCCTCAAAGAAAGCATAATTAATCTTTCAGAAGACATTTATTAAC  
CCAGATGATGATTTTACAATGTGGATTCCACCTGATGTACTTTTCAGTTA  
ATATGTGTTTAAATTTCTGACCTTGGAGACACTACCTCATAAGAGGTAGACC  
AACAGCGTGAAAATGACAAAAGAGTCTCTGAATATTTTTACTGGGGATGA  
CCGCCATGGGCAGGGTAAAGCCATAATGGTAAGGTGAGTGGTGAGACACT  
GCCTTGGCCAACCTTACCGGCTTAACCAAGCGTGAAAGCAGGTCTCCAG  
CCAAGTCTGTCTGTGGTGGGCAAAGGAAATTTGGAGAAGGCTTCACTCCAC  
AGTTGGCTTTGACTGAGCAACAGTTGGTCAGCGCATTTGTGTTTATGAGAA  
TAAGACCATGGGCATAATCCAGACCCATCCAGTTAACATCATTTATTTTC  
CATGACCACCAACTGCACCATTAGCCCTGCCAACAAATATTAGAAATGCTC  
ACATTTGGTTACCAGGACAATTTGGGCAAGAAGCAGCTCAGTACAACCTGTC  
CTCAATGCTGTGGATAAAGAGGCTTAGATGACATGGTCAGCATGATTGTG  
TTTGCATTTATCTACATACTATCATTTTCCACATATACTAGGTTTAAATCA  
TTATAATTAGAACTTAGGTGAGAGTGGCATATAAATGGACAAGGCAACAT  
TACAGGGCAATAGATGAATTTCTATCACAGGGACTTGGGGGAGGTTCTCTGG  
AATGTAGCAGGTGAAATCCCCACATTTCTTCATGCCTAGCTTTTCTAGTTA  
ATGTACAGCTGAACTAGGGTGTGTGGGGGGGATCTAAGTTATCTAGTTAG  
GGTCAACACCTCAACAATCAGGATTTTTCAGAAGTGAAACAATATGAGTTA  
TGAGAGTATATACTCCAAATATTTATTTTACTCTCTTCTCTAATATTTA  
AGCTATAAAATAGAGGTAACTGGAGAAGCTTGATATTAAGTTTCTTTTCA  
ATCAGATTATAAAATAACAACCTTGCAAGCTATGGAATTATTTAGGAGCCA  
TGTGGAGGCGCACGTGAGTTGAAGACAAAAGCACGTGTTGATGCTGGAAT  
GGGTGGTGGCGGTGACAGTGAGGTGAGGATGAGAGAGAGGATTTGGAGA  
CACATGTGAAGAGGTGGAGGTGGTGAGAGCAGTGGTGGCTTGGATGACAA  
TAGTCTCCCTGGTTCCAGTTACATAACAATATAGTCAGCATTCTCCCCCA  
ACTTTTATTTACCTAGTATTCCGGGCTTGTGGCCATAAACCTTCTCAATC  
CTTCTCTTTCTCTCTGACCCCTGAAGGACTTGTCTACCTCATTTCATC  
TTGAAACAAGAATATACTTCTTTGTATTAGTCTTCATCTATCACACATAT  
TTTTGTACACCATGTAGGTTCTAATTTCTAGAAATTGGTGTATATTA  
TATACTTATAAATATTGTTTTTCACTAGAGAGAAGGTGGGAAGAGCTGTTG  
TCTTAACAGCATCTGAATGTAATATTAAGGGCACTGTGTATCCTTGA  
AAATCTGTATTATACAACAACAGTGGTGATCAAAAGATGTGTTGATGCT  
CTGGGAGAAAAGAGCCTGAGCAATAAATAAGACTAAGCTCGCAGCAAACA  
GAAAAATAAAACAACAATTTGGGGGAAAAAACCCAAATGCTAAAAGCCCT  
ACTAATTCCTGTGTCTTGTATGTCATTCTCCACAACCTAGACTGCTGGGT  
TAAGGCCCTGAGTCCTTCCATCATCTTAGCACCAATGCCCTTCAGACAGA  
CAGCCAGAAGCACAGTGGTAGTTACTAGAAGAAGGTAGTTACTAGTTATT  
AGAAGAAGTGATAAGACAAAGCTTAAGGAATCATGAGGGTGTTCAAAAA  
AAAGGTATTAGAAAGAACCTCTTATAGGACTTATTTGGGTGGTTTCAGAG  
AAGGGCTAAGAAAGCAAACTTTCCAGAAGGCAGGACAACCTCCATGATTA

TTTCAATAAATCTACCTATAGAGTGGGGAGACAAGAACAAAAATAAAGCC  
CTAGTTGGTGAGGCGTCGCTCTATCATTTTTAGCCAAGAGAGGGTGGTGT  
TGGTAAATTTTGAGGGGGGGGCACTCTGTGTTGAGACAAAAATATGAGTTGT  
CACATGGCCCTGTTTTGTCTCTTTTGTCTATGGTCTCGGGACGCCTTGTCT  
AAGCCTGGTATTCTGTGAGACCGGTCATGTTGATAGAAATGGCATGGTCT  
CCTATGCATGCCAGGCCAGCTTCTGAGGGTCAAGAAGTTTGCTCTTTTTTC  
TTTCTTTCCCTATACTATACTAGGATTCCGTAGTGGCTTCATTTCTGTAC  
CCAAGAAAAAGTTATTTATTGTTGAAATGAAATGATTCTTCACCGATAAT  
CATTTCAAAGTACTGTTTCTCACTCTAATGATGATAGTGATGGTCATTGA  
GGGACAATAATACTAAAAGACCAACAAAGGAAAGGAGAGGGTTTGAGATA  
AAAGCTGAGGAGGAAGTGAGGAGAGTAGCTCAGTGAGTGCTGACCAAGCC  
CCAGAACTGCCTTATCTTCTCTCCTAAACACCTGACCATTTGAGGCATCC  
CCTGGTGGTGTACCTGCATTTCTCAGCTCAGAACCCCTAGGGGCCTAAC  
GTGGAATAATTGGGGGGGGTGGCACTCTACAATAAATGAGTGTCTTTGGT  
TAGTATCCCCAAAAGCAAAGGATTCACATAAAATTATTTTTAATTGAATT  
ATGATCAACATAATCTAATCAAATATTTAAATCTAATCAAAGTTAATAT  
TTTTTCTTTCTTTCTTTTTTTTTTAAAGAATATTTCCAGGAAACACCAG  
TAGGGAATTAAGGAAGGGAGATGGGGAAGGAAAGGAAGCTAAGAGTCAGG  
TATTCAGCAAAGTCCCACAAAAAAGTCACCAATAAATAGTAAGTGAGGG  
AGTGAGTAAATCAATAAAACAAAATTCAAGATCATAAAAAAAGAAGAGTT  
GTCAGGAGGACAAGAGGGTCCATGAAATCCTAAGTAAGGAGGCTTTCGTT  
GTCCACAAAGTAAGTGGGTGTCTGTGGTCCAGTGGCTCTCAAATGTCAGC  
AGCATCAGAAACACCTGGAAGGCTCGTTCAACTGTAGTCTCTCATTTCAGT  
AGGTGCGGGTGGGACTCAATAATTTTTATTATTTTTAACATGTTCCCAAG  
CAAAGCTGCTGTTCCAAGGGCACCACACTTTGTAAAAGGCTGACAGAGCA  
TGAGGACAGTCTTTCGGCCAAGAGACGCAGATGCTGGCTCCTGGGTGCGA  
AGCAACGGTTGCTGGCACAGATGTAAACCGTGCAGCAGCCCTGGGGTGTG  
CACAGAGCACTACAGCAGCTGCTCCAGTCTGGACCTAGGGCTGTCTGAAT  
CCAGATCTGGTACTGTCAGCATTTGTGGTATATCCCTTCTCAGCTGTGTG  
CTACAAGAAGCCACAGAATAAACCCTGGAGGCTTGTCCATGTTAATAA  
AGATGGGCAGCATGGGATGGACTGCATAGCTAATTTACATGATTTGTTTG  
AGGGATGTGTTAGGTAAAAATGCTTAAAAATATTTTATTTATTTATTTAT  
TTATTTATTTATTTATTTATTTATTTATTTATTTATTTATTTAGACATAGAGGC  
AGCAGAGACACAGGCAGAGGGAGAAGCAGGCTCTCTGCAGGGAGCCCAAT  
GTGGGACTCGATCCCACGACCCAGGATCAAGACCTGAGCCAAAGGCAGA  
TGCTCAACCACTGAGCCACCCAGGCTCCCCAGTAAAAATTTTCTAAAAAAT  
TATGTATTTGGCACTTTGGCTGGTACTTTGTGTTCTGCTTTGTGTTCAAG  
CCCTAGAACCATAGCTGCACATTTTCACGATAACCGAATTTTAGCTGTGA  
AATTTCAAAGGTACTACATGCTACTACTATAGGATTCCCTTTGAGTCTCA  
TGATTCAGTTTTTAATTTACCTCATTTTGTGTCAGTCAGGAAAGGTGATTCA  
TTTTTATATAGCTAACCAAACTTGATTTACGTTTATGACTCTGTAAGAC  
AGATCCTATCAATAAATTCACAATTCATAGAAGATTAGTCTGTGAATACC  
TTGTTCTACATTTTGGGCTTAGGGAATAGGTCGCTGTACCTAGGAGCATA  
AAATCTCCATTTCTCCAGTCCAGGTTTAAGCCAACAAGAGGGTTCCTTGT  
CACACTGGGCAGAAGCACAGGTAAGCAGAAATGTTCTGGAAAGAGTTTAG  
GGCAAAAGTGGATGCCAGTGCAAAGTTTATCTATGTTACACTTTTTTCT  
ATGGGCAGTAAGAATAATTCTTGTCTATGCTTGACTCAGACAGTACAAG  
GGCTTTCCATATGTTTACACACAAATCTTCACTGCACCCAGTGAGGTAAA  
TACATGAGGGTTTGGCAGAAATGAAGCCTGTTCCATGCATTTTTTCATGAG  
AGAAATTTCAATAAAGTGAAATAACTCGGTGTCCCAAAACACTATGCCAAC  
AAATGACAAGGAAGGCTGTTTACATTTGGATTGTGCAACCAGAACAGCTT  
GGGTTTCTTACATTCCAAGGCTTCCAGCCAGGCCTTTTCAGTTAATCCATT  
AAAAAAAAAAAAATGAAGTTCAATTAAAAAAAAAAAAAACTGTTTCAACAAC  
TACCTGGAAAACACGTATCATTAGAGAATTGTGTTTAAATGGGATTCCTT  
GAAAAACAATTACTGTCATACATAAAATTTCTATTTATATATGCAAAGTT  
AGTTGGGATTTTCAGCCAAATTATGCCAATTATTTATTATGTCTTGAATA  
CTGGAAAAATCCATAGAGTTGAAGCAAAATTTTTTGTCTTGAATTTTCT  
GAACATCCATTCTTGCATACCTACGGGACACTCATGTATAACCCAGTAAA

CCTCAAAAAGTGCTGAGTAGGCATGGTAAACAGTTAAATAATAAATGGAA  
AAAGAAGAGGTAGCAGAAATGTGAAATATCTCCCAATGTCAGCTACTATT  
CTTCTATAAAGAGCGGTCATTCTCAAAACGTGGCCCCCAAATCAGTCATA  
TCCACACCACCTGAGACTCTGTTAGAACGCAAATTCTAGGGGTCCTGCCT  
CAGACCCACTAAATTTGCAACGCTGGGTTTGGGGTTCAATACTGTGTGCC  
CTAAAGAGGCTCCCAAGTGTTGTGGTACATGCCAAAGTTGGAGAACTAA  
TGGCCTGGCCACCAATATGGGAAGGCTAAATAACAATAGAACTAAAAATA  
GTGTGTAACACAGTATGGCCCCACAGCAGAGATCATTTTATTTTTGTTCT  
TGTTTGTGTAAGTGTATGCATAAATAGAAAAGAAAGAAAGGAGAGAGGGA  
ATGGGGGGTGGGGTAGAGAGAGAGAAGGCCAAATGTTAATAGCTTTACAG  
GCGATTTATTTTTGCTGCATACTTTTTAGCATTTTCCAAGATTTCTTCAT  
TGAATAGTATTGGTTTTGCGATTAGAACTATGTTATTAAGGAGAACAAC  
ATGTTAATAAAGAGAAAAAGCAATATATTCTTATATTATTGTGGTGCCTTG  
AGAAATTGTGCCCAGCTCTAGTGTAGCGATGTATAAAGCAAAAACCGTTG  
TCCGGTAGGCAGCAGATGTACAGAAGCAGCTCTGCTCTCTTCATAAAGTA  
GGAAAACTGTCAGCACAGGGCTTATAACCACATTTCCACCTGCTCTTAT  
GGTAGGCACTTTCAACTGCTGGAACACAGCTGGCTGAAATGTGGGGAATC  
CTTTGCTGAAAGCAACCACTGCCATGGGGTCTTTCACATTCACATTCCTT  
CTGGGAGTCCAACATCTCCTTGGCTTTGGTTGCAAATGTAGATGCTCATG  
GCTTCTTTGTTACACCATTTGATAATTGAAAATGTCTTTTTTTTTTTTA  
AATGACTGAAATGGTGAATGCTTACTTTTTGGGAACTATCTGGAGCCACT  
CTTGAGAGTGAAAGAGAAAAAGCCAGACGGGACTTTCTAAATGTCTGA  
CCTGAGCCTACCCTGGAATTGCCAAGCAATTCAGAAGCAAATCTGTCTT  
TCAAAGGGTATGAGTTTCTGCTGCTGTTATAACAAAGTACCATAAATGT  
AATGGCTTACAACAACAACACAAATTTATTCTCTCACATTTCTTCCCGAA  
ATTTATTTTCGGAAATATAAGAGAATAAAAGTCCTAAAAATCAAAGTTGGT  
AAGGTTGCCTTCCTTTTGGAGGGTCCAGGGGAGAATCAATTTCTTGTCT  
TTTCTAGCTTCTGGAGACCACCTACATTCCTTGGTTTATGGCCTTGTTCA  
GATATTCTGACTTCTGTCTCCATCATCGTGTCTCCTTCTTTGACTCTGAC  
TCTAATGCCTCCCTTCCAAGGATTCTGTGATTCCACTGCACCCATCGAG  
ATAATCCAAGAGAGCCTCCCTATCCCAACATCCTTAACTTAATCACGTGT  
GTGAAATCCCTTCTGTCTATGGAAGGTAACATATTTACAGGCTCTGGGGGA  
AAGGGGAAGCATTATTTTGCCTATCATAAAAAGGGAGAAAGTTTTCAATA  
TTAACCTACAGTATTCTTTATCCACATAGCTAAAGAATATTATTCCTGTC  
CCATTTGCTAAAGATGGAGAGACAGACTTCAAGAGTTATATAAATATTTA  
TCCTTGACAATGACAGAGTCCATGCAATGTGCTAGTGAGGAAAACCAAGC  
TTCTGTGGCAAGATGAAGTTGAATTTCCAACCTATTGTATTTAAAGAAAA  
AAAACCACCTCTGCTTTAGTTATTACAAAAGTTATGCATGATGATTGAAC  
ATAACATTTAAAATACAGATAAAAGGAAACGAAGACAAAGAAAATGACAG  
TCTCTTGAATTTATATACATATTTGTTTCTATTTTAACAAAACCTGGACCA  
CAATGCACAGCCTGTTTTAGAACTCCTGTTTTATTACTCCCTTGTGAAAT  
CTTTTCTGATAGCATTATTCATTTACTAAGTTCCGCAAAGTCAGAAATTA  
TTACACAATTTCTCTGATGTTATTGGAGATGTAGGTTGCTTTTAATCCTT  
TGATTTCAATAATATTGTTTGTGAGCATTCTAACAGGTCAGGTCAATCT  
CTGTGCACATTCTGTGTTATTTACTATAGTAAAATGACAAGGGCAAAAA  
AAAAATGGCTGACTATTTTTAAGTACTTACTTCCATAATTGATGATGCCA  
GGGCCCTAAAATCACATAAAGGCAATAATATAAAGATAATATTTGGGACC  
ATTCCACTTTTTTTTTGAAAGAATTTCTCCATCACTTTTTTGGAGATAGAA  
AGTTCAGAGTCAAGTGTGTTAGTTATAACAATAAACACTTATACTTCATTT  
AAAGAGATGGTAAGTAAATATATCTGGGATCCAGCTATTTAAACAGCCTT  
CATTTAAAATGTATGGCATGTAATTTTCATCTCTACAGAGAAAGACTTACC  
TTGCCCTGGGCAGAGACAGCTCTAGTAGTGAACATGGTGGACAAATCCAG  
GCAGTAACTGGAAGACCAGCAAAAAGCATGGGCTGGCTGAAGGCCAAATG  
AAACTTTGTTAAAGAAAAATATCTGCAGGGTGATTTTTTGAAGACACAAA  
AATTAAGTAAATGCTCATCAGTGTAGTCCAATCATGAGATGTTCCAAC  
GCCCTGCGGATTTTACAAACCTGTAAGAAAGAATGAACGTGTTTTCTTTG  
ACACTGGAGTTGGTTACCAAATGCTGAGACCTTAGAAATCAGGTGGGTGG  
TTTCTGTTGAAAAGTTACAGTATACAAATAATGACAACCTAATTTTATTGA

GGGATCTCTGCATTGCGATACGATGTTCCATGTTTGTATGCAGTTTTATA  
AGTACTCCTCACAGCATTTTTTAAAAAGGAGGTTACCCATTCTACAAATG  
TAAACTGAGGCTGGAAAATTTAGTAAGATTTAGAAGTTGAAAATGATCA  
TAGAGTTAATACAAGTTGGCTCAGGTCCGAAGAACACCAAAATCTATCAT  
ATTAACATGCTCCTTTGGCCTCAAGAAAGTAAGAGGAAGAAGGCATAGAA  
GGGAGGATTTCAAATTAAGTTAATGACAAAATAATTTTTTTGAAAATGT  
CTAAGTAATGATAACATATTCATAATATAAGATTCAAGGAACTAGCCAA  
TATTTACATTTTTTACATGAAATCAATCTTTAAATCAACATGAAATTTTGG  
AAAATATAAATTCATATATATATATATCTTTATATACAGTGGTGGCCTTT  
GAATGCTAGAGTCTTAAATTACTCGTTTAACTAATCATCTTATTAGCATT  
TTCTATAATGGAGATGGCAGTATATTTTATAAATTACTTTTAAAAAAGAC  
AGAATACATAACCATTTTATTAATAAGAAAAAAGAAAAACAGAAAGGA  
AGGGCCCCCTTTAAAGATTTCTCGGATCTTCCATAAAATAAGATATGCAA  
GGGAAGTGATCATTTTTTTCTTATCAGTATTACAGGTATGGTGTAGACA  
TAAACACATTCTGTGCAGCGTTTAATTTGTGAGACTAATAAAATTTGCAA  
TGTCCAAGGAATATTGTGACAAATCAGTCCACTACACATTTTCTCTTGAA  
AACCATAGGAAATATGCACGTGCAAGAATGAAACATAACCTGACACTGAA  
GTCTTATTGTAGAACTCAAACAACCTCATCTTGCTACCAGGGATTTAGATT  
CCCAAATACTTTATAGTAGTAAACATACATCAAGACCTGATTCTCTCCAC  
TTTAATCATTATACACACTGCAATTGCAATTAAGTAAAAACATGTTAATT  
TCAATCAAACCATAACAGACCGTGGGATCTAGAAAATGTCTGGAGCAACT  
AGAAAATAGCACAATAATTTGAAGTCCTAGGCTTTTCTTGAGACGTAGACA  
GCCTTTGAACATTATATTGGTCTCAGCTTGGGAACTGAAAATCACTTGTA  
ATGAATTCAATTCAATTTCTTTAATCTGTGAACTCATAGAGTTAATGCAG  
GTGAGGTTATTTGTTTTCAATGAGCCATTTAATATAATGAAGGAGGGTTT  
TTGTAATCCCTAATTAATTCTTGCCCTCAGCCCACCAATTGATTAATAAC  
CCATGGGAGTGAACAGTCAGCCACCTCCCCTTCCAAATAATTGCTATGCT  
GGTAGGAATGTCACATTCAAAATCACCATCATTAATAATAACAAATCT  
GAGTAAATGATGGTGGCATTAAATGAGTCAAACAAGTTCAATTCTTATTG  
ATTAATTGGTGAAATGTATATCATAAGCACTGCAAATCTACCTTAAATAA  
ATGTAAGAGTGGAGAAGGGAGCTGTGGTTTTTATTGAGACTACTTCAACT  
ATCCAAACAAGTGTTTTCTTTTTTTAGTGAGCAGAATATAATATAGGACTG  
TGCAAGATGACTGGCTGCTATATTTAACTCAGACAAATGCATAACAAATC  
ACTATTCTGTAGTGCAAAGGCACACCTCATAGGCTCCTGTTTCTTTCTTT  
CCTTTTTTTTTTTTTTTTTCTTTCCCTTGGGGCCTGGATATAAGACCACAGC  
CATCTAAATAATCCTCCAGAAATAAACCAATGAAATTGTGAGTCTGACAA  
CAGACACAGTATTATACCTGCAGCTGGTAAATGTTTCCATAGTCCAACCA  
CCTTTCAGTAAAAATTTATCCCGGGGAAAGTCAGCAACTAAGATTTT  
AACTACTTTTCTGCAATAGAAAAGTTTGGAGCAATTGAGACTTCATAAAT  
TTCATTATTTATGGCCTTTATTTTTCTTAGAGAATTACCCACCCATCAAG  
TATATTGTGAAAATACTACTACTGTATTACTATATTCCCATATAAATAAT  
TTTTTTAAAAATTTGGGTGATTAACTATGAGACTACCTCATAAGAAAGT  
ACCTAATTCAAAACCATTTTATTGTTTTCTGCATTACTTGCTGTGTTCA  
TAATTGTCGAATGAGCATTTCAATTACATGAATATTGGGAGACTAAAAAT  
GTTCTGTAATGTTTTGGCCAATTACCTGACTGTGAACCTCTACTGACTGG  
CCTACTCTGTTTTGGTGGGGATCCTAAAAGTTAGAATGCTTGGACATTGG  
ATCCTACCTGTTCTCTCCATAGAAAAAGAATTTATTTTCAGCACAACTTT  
GAATTCAGGAACATAATTTCTAATAGATACTATGCTAATACTGGGGTATGA  
CCTGGTGAGTTTTAGTCTCTGCTACTGTGCGATGCACTGTGGTGCTGGAAA  
GAAAGCACATTTCTACAGAATAGTAAGCAACTCCCAGAACTTTGGTGAGA  
AGATAGTCCCAATCATTAACAAAGTTTGCATTACTTATTAGAAGTTAA  
GGTGTGACCCCTTTTACCTAACACACTAGTTCCAGGAATCCATCTGTATA  
CGTATGTATGGCAAAGATATGTGTATAACGGTGCTCACCACAATACTCCA  
AATGTTATTTGTAATGGCAAAGAACAGCAATGTAGGAAAAGATTCACAAA  
AGGAAAACATTTGTAATTTCTTTCTTGCTCCTGAATTCTTCCGAGAAACACA  
GCCTTGAGATGGCTAGCTTGTAGGCGTATTAGGGGAATCGATCCCAATC  
AATGGGAGTGAAACACAGGAGTAATATGATAGAAAAGGAGGGGAAATAC  
CAATCGCAGGGCATGTTATTGATCTGCATTTCCAGAGGGCAATAATTTAT

CATCGCCTATCGATCTTGCTGGAGGGGACCCTCCAAAGAAATATATAGTT  
TGTCTTGCTATTATTTCTGAGGGTTGGAATCTGATATTTGTCCCCTCCA  
AAATTCATGAGTTTTTCTACGGAGCCTCAGCTTCCTTGCTCCCTCACATT  
CTCTCATTGTAAGAATTTCTGATCAATTGCCACAGATGTCCCAAATGGGG  
GACATTGGCAGAGAAATGGCAGAGAAATCAAAGACCAGAAAGGGAAGGTC  
ATGCAGTGTGGCTGAGACAAGGGGCTGTCAGACTCAGCCTGTGAACCACA  
AGAGCAGATGAAGCACTGCGTCAGCTGTCTCTCAGAAATTGTATTTGGCC  
ATTTTCATTTTCATTCAGTTAAAAATGTATTGACCTTTTGATTTCTGTTTT  
TGATTCATTGGTTCTTCAGATGTATATTATTTAATTTCTAAACATTTGGG  
ATTTCCCAGATATCCTTCCATTGTTGATGTCTAATTTAGTTATGCTGTGG  
ACAGAAAACAGGCTTTGCATGATTTTAACACTTTTAAGTCATTGAGTTGG  
TTTAATGGCAAAAAATATGGCCTGTCCCAGTGAATTATCCATGTGGATTT  
GAACGTGTATTCTGTGTATTGGGTAGAATGGTCTCTAGAGGTCAACGAGG  
TCAAGCTGGATGATGGTGCTATTTCAGGACTTCTATGTCTTCATAGGTCTCT  
CAGACTAATTTCTTATTAAATCCTGAAAGACAGGGGATCCCTGGGTGGCG  
CAGTGGTTTTAGCGCCTGCCTTTGGCCCAGGGCGCGATCCTGGAGACCCGG  
GATCGAATCCACGTCAGGCTCCCGGTGCATGGAGCCTGCTTCTCCCTCT  
GCCTGTGTCTCTGCCTCTCTCTCTCTCTGTGACTATCATAAATAAGTA  
AAAAATTAAAAAAAAAAAAAAAAACAAAGATCAAAAAAAAAATAAAAAATAAAA  
TAAATCCTGAAAGACAATGCTAACGTTTCCCACTGTGATTGTGGATGTCT  
TTCTTCCATACTATCAGTTTTTCGAGTCATGTATTCTGAAGCCCTGTTCTG  
AAATATTTAAATTATGTCCTTGGGGAAGAAACATTATCATTTTGTAAATGC  
TCCCTCATTATTTCTGGTAACGTTCTTTTTTTGACATTTAATTTATCTGA  
TATAAGTAGTCTTTCTAGATTTGTTTTAATTATGGTGGAATTCCTCTTAT  
CTTAGGCAATCCACGGTTCATACTTACAGTGGAATTTATCCTGGGCAATAC  
ATAGTTGGGTCTTACTTTTTTATGCAACTTAATAATCCCTGCCTCTTAAT  
TCACAATTTTTGTATAATCCTTGTTGTTATCTCTTCAATTTCTGCCTTC  
TCTCTCTTCTGGATCTTTGCCTGCACATAGGTTGGGCCATCTGATTGTAT  
CCCACGGTTCTTGAATGACCTACATTGCTTTTCCCACTTTTCTTTTTTCAT  
TTTGTGTTTTCTTTGTTTAAATTTCTACTTAGCCATCTTCAAGTTCATGA  
ATTCTTTTCCTTGAGGTGTCAAGTTGGTTGTGAAGAAATATACAGCTATG  
ATCATTCAGTAAGGAAACCATGTCCTCAATGCTTTAAGACAAAACAAGGC  
TTGGGTATCTTCTCTACTCCCCCTATGCCATTTTTTTTTTAAGATCTCAGG  
AATATGGGGGCATGTGGGTGGCTCAGTGGTTGAGCGTCTGCCTTCGGCTC  
AGGGTGTGATCCCGGGGTCTGGGACTGAGTCACACATCAGGATCCCCAC  
AGGGAGCCTGCTTCTCCCTCTGCTTATGTATCTGTCTCTGTCTCTCTCTG  
TGTGTGTATTTTCATGAATAAATAAATAAAATCTTTTAAAAAAATCCCAGG  
AATAAAGAATCATAATGGAAACATTTTAAGTGTCTGGAAGTGTCCCTGC  
TAATAAAAATTACTTTACAGTCAAAGATACTTTGTTGAATTGTTAAGGAT  
ATTTGCCAATAAATATTGTAAGCTTTGGGGTTAAGACTGACTTCATTTTC  
GTTATGGGAACACAGCTTCTATGTGACATCTCTTAAATAAGAGCTACCAG  
CATCCCTATAAATATTGATATGGCATAAATGAGAGGCAGCTGAAGGTTTT  
TCAGACTGATTCTATGAGGTTGAGCCATTAATATGGATACACAAAAAGGA  
TAGTATAAAAACGCTGCTGCAGAGGCTTATTTTTTTTACATGCCTTGATT  
ACATGATAACTTTGTTTCTACTTCCACCTTCACCAATTCATAGTTACAT  
ATCTGTTGATGTTATTTCATTTTGGACATTCTTTCTTTAATGAACATAAATA  
TCACCAGTCTGATGCCTATTATTTTGGGGTAAACTAAAAACACACCCATT  
AGGAACACACTTGATTTTATTATAGCCTGTGAAACAATTATGATAAAAGAT  
GGCCTTCATTACCTTAGTCCTCACCTTCAGCAGCTTCAAATACCTTTTGG  
AAAAAAGAAAAAAAACATAGGAGTAAATAAATAATGAAGTAATTTTCCTT  
TGGGTTTTGGAAAAAAGATAGGCTTTTCATTAAGTTCACATTTACACTTT  
CTCGTGTTTTCTTTATACCTGTTTACATGTTTGTGCGATGGCAGGCTAG  
GGCTTCGGGGTAGAATATTAGCTATGGAAAATTTTTCTCTGTACAAATC  
CATATGGCCTAGTTAATAATAATTATTGAGTTAAATCTGTATACTTACTCT  
AGGAAATTCAAGTCTTTTCTAAGAATTCCATTTATAAGTGTGTTTCTGCA  
TCCTGTGGACACACAAGATAGAATTTAGAGGTGTCACCAAGCCTCTTAAA  
TAAGTCAGTTTGGACATGGCAATACCTTGAAACCTACGTGCTCTGAGCCA  
AGTAGATGTATGTACGGCCTTTGAGTTACATTGACAACAACCTTTCAAGAT

TTAAGAATTTGATCTAGGTAGAATGATGTGAATGGGCCTTCTTGAATTAT  
TTCAGAAGATAATGAGAATTATTCTGAGGGGCTCGTTCTTATGATATTAA  
CAGAGCATCTTGATGGCACTGGAGTTAAAGGACACTCTAATAATTGCTTT  
CTATAAATAACAAGAAGTTAAAGGTTGTACCGAAAAATAAAATCTTTAGGA  
TATGGTAGTGTGGCTTTGGAACACCTAAATTCCAAGTTTTTAGGAAAAGG  
GTGGTGTCAAACACAGACTTTGGGGTAATTACAGTCTCCTACCTGGAGAC  
AGCTTGTATTAGAAGCTTCACAGTATGATATTCTTCCTTTATTCCAGGTA  
CCTATTTTTTAAGTCGCAAATAACTCCAAATGTTGGTGGCTGAAAACAATA  
ACCATTTATTTGTTAATGTACTAGGAGAGAATTCCAGCATCTCTCCCTTT  
TTTTAAATAAGGACAACAAATAGACCTGGGTCCGACACTCATAACTTAAT  
GACCTAAATCTAATTACTTCTCAAGTGGTCCATTTCCAAATGCCATCAC  
GTTGAGGGGTAGCACTTCAGTATGAATTGGGGGGGGGGGACACAATTTG  
GTCCATAACAGATATTGATCTGTTATTTTTCTTACAGTTATCTTTGTTTGG  
CTTGAGTATCAGGATAACCGCTGGTCTCATAAATTGTGTTGAGGCCTCAT  
AAAATGTAAGGTATGATCTCTCTTCTATTTTATCTTCATGTACAATTTATA  
TTCTTTCTTTCTTAAAGGTTCTATAGAATTTATCAAGGAACCCATCTATG  
CCTCTCTCTCTCCATATATATATGTGTGTGTACACACACACACACACA  
CATATAATTTTTGAATGTTTTAAACTACAAATTCCATTTGTCCTTTTCCA  
AAAATTGACCTTAGTTTTTGGGTAATTCTAATTCCATAGACAGAGTTTTGT  
GTTTCTGAATTTCAATTGAGATCAGTTTCCTATGTCTCTTGCTTCCCAC  
GCTCCATCTCTCACACCACATGCTGGAATAGCCCCATGAAAATTGGTAT  
TTGCAAACTATGTATAAGACTCAATGCAATTCATTCATCAGGGGCATCTA  
TAGTACAATCCAAACAACACACACACACACACACACACACACACGGGAGG  
GAGTGGCTCTTGATTTAGATGATAACGCTTTGTCTCCATTGCTCCAATC  
AGAAACAAGCATTGGGGATTCCTTTTGGAACCTCGCCCCACATTTGACTA  
GCAGAATACACTTAATGCCATAATTATTTGCTGGATCCCTGAGAGATTTA  
CTTAACAGAGGCTCAGAGAGAGAAAGAGAGAGAGAGAGAATGGGGAATTT  
TCTGGAACTAATTAGCTTTAAACCTTAGCTTTCAAAAAAAAAAAAAAAAA  
GCCCCAAACCTTAGCTTTCCCTTTCAATTGACTTTGCCACACAAGATCA  
GATTGGCAGAGTAGCAATATAAACTTTATTTGCTGGGATTGATTCTGGAC  
ACATAACACGTTTTCTGCTGGAATATGTGTAAGTATAGGTATAAATGGAT  
GCACTTTCCCCTAATGCTTTGCATTACAGAGGCTTAAAAATACCTGCATAA  
AATGTAGTCTTTCTTTCTAAAGAAATTGATTTATATGGATGCTGTTTTAC  
GACGCCCTACAGTATTCGTAAAGTAAAATATGTTCTAAATCCTGCAGCTC  
TAACTGTGTGATCCCTACTGCCATTATTTTAGTCTACAGAAATTAGGCTG  
GTAATTATCTGACTCCACAGTTATGAGGCACGTACTTTATCTCGTATACA  
TTTGTTTAAAGTGATCTATGGTTTTGTCTTATGAAGATATATTTAATGCT  
GGCTCTTAGATTCTTCTAGACAATGTGAACATAAATAGATAACAAATATA  
TTCTTAGATCGAATAGATGTGGTATTTTCTTCTTAAAAGATATGGCCATT  
CTGGTAACATTCTGGAATGATGTAGAAGATAGGAAAGCATTTCAGTGTAG  
CTCCCAAGTTATTTGAACATATAAAGACAACGATTAAATAATTTTGAAGT  
AGATTTTGGAGTATTCTTAATTGAAAGGCTTTCCTCATAATTGGAACTT  
CAAGGTTAGTGATGAGCAAAAATGTGAAATGAAGAACCTGATATCTAAAT  
ATCAGATTGATCCTATTTACACACTTTCACTGAAGTCTTCTCGCTGTTA  
TAGTTAATAAATGTTATTTTTATCAGTTTTTAAATGGTACTTGAATAGACA  
TTTTTATTTTGAGAAAGTAATGCATTAAAATCTTGAGGGAAATTTAAGCA  
GAAATAAGCAAAAACGATTTTATCTTTCCAGGAGCATCTACAGACAGT  
GTTCCCTCCGGAAGGTATGAATACCTATAGTACACATATAATATTCTGGA  
TAATCAAAAGGTAATATCATCATGTAGCAGACATTTGTAGGGCTGAGTCT  
TCAAAATTCCTCCTTCTAGGGATGCCTGGGTGGCTCAGCAGTTGAGCGTCT  
GCCTTCAGCCCAGGGCGTGATCCTGGAGTCCAGGGATCAGGTCCACGTA  
GGGCTCCCTGCATGGGGCCTGCCTCTCCCTCTGCCTGTGTCTCTGCCTCT  
CTCTCTTTGTGTCTCTCATGAATAAATAAGATAACTTAAAAAAAAATACCT  
CTTTCTAGAAATAGACACTTTCTCTCCTCTCTTCTTTAGCATTTTGCCTC  
TGCTGTCTGTCTGTCTGTCTGTCTGCCGAAACACAATGTGTGAGCTTCTT  
TAGCATTTTGAATTTGGTTTTCCACCCTTGGACACAAAAGTAAAAGTCTC  
ATGAAAAAAAAATCCATTGGGAGACAGCAGACTGATCTCCAGCCCTGAGT  
ATGCCACAGATCATGTGAGCTGAGGGGAAGCCACCTCCCCTCAGGACCTC

GGGCATCTTATCCCAGTATTACTCACCGACTCATTTTTTTTTTTTAAATGA  
GCATATATTGAGTGCGAACTATGTGCTAGACACCTGTGATGACACAAAGT  
TTATGGGGGTAAACAACAACAAAACATCATAATTACAGTTCCTAAGAGAC  
ACAGGCTAGAATTTTATCCCGGCCTTCTGACTCTAAAGCTTTTCAACACT  
CAAGTATGATACTCATATGAAGTGATAGTAATTTAAAGCCCCATATTTTG  
CCCATTGTATTTAGCTTTTTATACACAGCAAAATAGTATATTGTCCCAAT  
AATTATTCAAATGTAAGTAGATATCTCAGTCCCATATTTATACGAAGAAA  
TATAAATTATACATACCCACAAGCCCTTTAAATATGCTTTCACCTTTAAA  
ATTACATTTGGGGGTGCTTTGTGAAAATAAAATAACTGTTGATTTATGG  
GTCTTAATAAGAGTCCGATCCTTTCTTATAATAGAAGTGTTATTTATGTT  
GTTCCCGTTAAGACAGGAAAGTTTCTCCATGGGGGAGGAAGCCATCTGAT  
TTCCCTTTGGGGGTCTTAAAAGTGATTTTCTATTTTACAAGCTAGAAAGG  
AGACCCCTGTGTACTCTGCTTTATGCATCCAAAGCTTATCTTTTCTTGAA  
AACCCACTCAATCCCTTTATGATTTGTGCCCATGAATCTTCCCTGACCT  
CTTCAACTTGTGATCTCATGCTGCTCTAAACTAACCACACCGACTCTCCT  
TTCAACGATGGAATCAGGGAACACAGGATAGAAGCAGATAGCAATGCTCC  
CAAAACAGGGAACTGAGGCACACACCAAGTGAGAGAATTGAGAAAGCCTT  
AAAGGTTAAGCATTGCCAAAGGCTCAGAAATTTAGAGTAGCTTTCTGGAA  
ACAGGACAATGACTGATTCCAGCAAAAGATGTTCTCATGTATAAGTCCAG  
GCACCTGGAGGACAATGATCCAACAGATGCCTCATGCTAAGTCATTTGTG  
CTTCTCCTGGGGATAGAAAAATAGATTTTAGGGTGTATCATAGAATAAA  
CAGGTAGAGATAAGATGACTTCAGTAGAGGAAAAGGAATTCGAAGGTATG  
GTGTCCTAACTTTTCCACTGTGTTCTCTTTGTTATTAGTATTATTTTAA  
ACTAGCTTAAATTTTATTGTTTTGAGAATTTACTCAGTGGATATACTATT  
AATGTTGCGAGTTAGTTAACTTTTGATTAACTAATCGACGTCAAAGCTCA  
AGGTGACTTATACCACTAATTGCATTTTTTAGTGGCTTATAACAAATAAC  
TACTTATTTCTTGCTCAAGGGTTGGTTGTGGGTCCACAGGACTTGACCA  
GGAGCATCTGGGCCTGGCTTCACGTCTTGAGTTGTATTCCAGTTGACCTT  
ACAGGTTTCCTTCTTGTTCTATTCTGTTGGATCTCAGGCACGCTTGGA  
AAAACAAATCACAAAAGTGTGTTCTAAGCCTCTGTGTGTGTGTGTGTG  
TGTGTGTGTGTGTGTGATGTTTGCTACTATTCTATCACCAAAGCAAGTC  
ACATAGTCATAGGCCCAAGCCCCACAGCAGAGGGTCAGGAAAGTGTCTGT  
CCATAGCAGGAGGCCCTGAAGTCATAACAAGACTGTAGTTATTATAAAGG  
AGAGAAGAAGTGACAATAAGAAATTTAATCCATCACATAAAGTTAACAAC  
GTACCAAACGCTTATGAGAAAAATCAGTATTTCCCCATAGCAATCTTTCT  
GAGCACCTAATTCTGCTTTCCAAGAGGCAAATATTTTCTATTGCTTTTAG  
TGTTTACCTTTATCTATCTACCTATCTATCGATCTATCATCCATCCAAT  
ATATTCAGTAAATAATTTGTGTTTATATGTAATATAAATCGGTATTTAT  
ATTAATAAATTTTAAACATTATCCTATTCTGTAAACAGTTAATAAGTGTT  
TGGCTTTGTTGCACACTCATCTATGTTTTCCATCCTCCCATTATGTCAAT  
ATAATTCATCACAAATTTGGGGGTAAATCTGTTACCAGTGTTTACATTAT  
GTTATTGATGTAATTCAGTCTTACATAATACCTTTTAAATTTCTTATAC  
TTAACAATTTTAAATCTGCTTAAATCCCTTTGTACCTATTTCTATTTTTT  
AATGTTCCAAAAGACATTGACAGGTCTTTGGACCCCTGCCATTAATTTTT  
CCTGGTCTTCAAGCAAAGATCCTAGCACTCTATTAATTACATCCCCTGCC  
TCCAACGCAAGTGCCCTCAGACACCATCTCCCCCTGCCTCCCCCAACTCT  
CAGAACTTTTCATCCTTCTCTCTGAGCCCTCTATTATCTATTCTCATG  
CAAACCCCTCATTTCTTTACTTCTCCACTTGAGATACTATTATCTCA  
AGTAACCAATATTCTATTAGTATTCAAAGTTTCTGTTGAAAAGTCAAATT  
TCAGATTCTTAGCATGTTTCTTTGTCTCGCGAGTTTTTAGTGTATCCACT  
TTATTCTTTTAAAGTTTGAATTCACAACAACATATCTGTTGCGGATTACT  
GTTCTAATTAGTGACTTTTTTCACTACTGAAGACTCATTTTTGAGTTTGGGA  
AATTGTCTTTTTGTTACTACTATTATTACAATTTATTTACTTATTTTATCC  
CATCTCTGAATCTTCTGGAATTCCTTATTTTCATTATCTTTTCTCTCCTA  
CTTTTCATCTTCTTTATTTTGCTTTCTGGACAAAATTTCTCTGTATTACT  
CTGGCCGATGTCACCGACATCTCTTGCTTAATTAATATAATGCCTTCTC  
AATTAATTTTTCTTGACCTGGCTCTTGCTTCATTATAGTCCAGGCTCAACA  
TAGCAACCTTTTAAAATTTGTCAGAATAAATATTCTTGCCTCAGACTTT

GCAGTGGTTTTGTATTCTGTATTTTCAGAGTAGGAGTTAACATCTTCATAGC  
AGCCAACAGGGTTCTTCTTGGACTAGAACATCTTTAGCCCTCTGTTCTGC  
TTTCTGACTTTTTCTCTCTTGGCTCTCATTCTGTGTTAGACTCACCAACTGC  
TTTCCTAGTTCTCTGACATAGTGTGTTGTCTTATGGAAATAAAAAGTGAGC  
CACAGATGAATGCCACATGTGTAGCTTTAAATTTTTAGTAACCAATTAAA  
AATAATGAAAAC TAGGTGAAATTAATTTATTAATATATTTAACTGAACCT  
AATGTGTTTCAAATTTATCTTTTAAATTTATCTTTTAAAATTATTTAATG  
AGAAAATTTTACATTTGGTCTTCAAAGACTGATACATATTTTACATTTAC  
AGCACCCTCAATCAGCTCAGCACTTGATCTATAACTATCCTGAGATCCA  
GAGATCTCCCAAATGGAAGCAAGAGGTCAGGCCTTGCATTAAGCCAATCC  
TTGTGTACGGACCACCCCGGAGGGAAGCATACAGCAGCTTCCTTCCACTG  
AGGGCAAGCGATGCCCAAGAGAGGCATTGCTGTGAGTTTTGGGCAGGGAA  
GAGTCCTGAACCATTAAGTCCCTCCAGTCTGGAGGGAGGATCTGAGCCAG  
GCACCACAGGATGTAAAAATAAAAAGTAAGATGTAATAAAAAGTTAAAAAAA  
GATGCAGCAGGCAGGCCTTTTAAAAACACACATTTGTTTACAAC TAACAC  
CTTTTTTAAAAATCTGAGACACACTATTAATTGAAAAACAATGATTGCTCA  
TTACTGTTAAGAGTTAAGAGTTTTTTTGGATGCCTGGGTGGCTCAGTGGTT  
GGGCATCTGTCTTCAGTTCAGGGCGTGATCCTGGGATCCTGGGATCGAGT  
CCCACATCAGGATCCCTGTGAGGAGCCTGCTTCTCCCTCTGCCTGTGTCT  
CTGCCTTGCTCTGTGTGTCTCTCATGAATAAATAAAATAAAATCTTTAAAA  
AAAGAGTCAAGGGATCCCTGGGTGGCGCAGCGGTTTGGCGCCTGTCTTTG  
GCCCAGGGCACGATCTTGGAGACCCGGGATCGAATCCCACATCGGGCTCC  
CGGTGCATGGAGCCTGCTTCTCCCTCTGCCTGTGTGTGTCTCTGCCTCTC  
TCTCTCTCACTGTGTGCCTATCATAAATAAATTAAAAAAAATTAAAAAAA  
AAATGAAAAATAAAAAAGAGTCAAGAGTTTTTTAGTGGGTCAGTAATTTA  
AGCACAAGGATCTAAATAATTCCAGGTTTAAAACCTAGATCAAAACATCG  
AAAGGAAGAAATATAAATGTATATATATATACACATATATATGTATAATG  
TCATTATATTACTATATATGGGATAACTGATTTATCGTGAGAGATAAATT  
CTATCCATATGCTTAAATCTCCTCCAATAATTTTTATTAAGTCATGATG  
AGATTAAAGGAATATACTAACTCTTCCTTCTGATAAAGCAGGTTAGGAGA  
AATTAAATTGAAGAAACATTGGTGAAAATCCTTCTAACATACAAAAGTCA  
GGAAGAGTGAGTCTGAGACTTAGGGCCAAGATATGACTCGGGAGTGATAC  
TGAATGCGCTTCAAATGGGTTTCCTTTTGTGTCCTGGACCAGAAGCATTT  
GCAGCAATCTGTGAAAGAGATACACACCAGGCAGAAAGTCCAGTGGACAG  
TGAGGTTTCTTCTTGATCAGGCGAGCTTGTCACTGATATTTCAAGCAGCA  
GCACCAGAAAGGGTATCAGGCAGAGACATATTGTGTTCAAGGACTGAAGG  
CAAGCAGAGCAAACAGGGCTTATTGATAGCGGTCCCCAGCACGGCAGCGT  
CCCCAAGCACACAGAGATAAAACAGCACTGCTGGAAATGCTAACTTGTCC  
ACACTTTGTATTGCTGAAGTGGTAATGAGGATGCATATCTATTATATCGG  
TTCATATTAGGTTTGGCTGCCTGGCAGGAAATCCAAGTAAGTGCGGCCCA  
AAGGAGGTGTGCTGCATAAAAGTTACTGAAAGTGGAGAAGGAGAGAGAGA  
ATCAGAACTGAAGAGATTTCCAGAAGATGTGGGGCAATAAGGAGCACAAG  
TAATGATCAAAATAGAAGAAAGCCCTTGAGAAGGTAGAAGAAATGTGTGG  
GAAATATCAGAAAGGGAGACAGAACGTAAAGACTGCTAACTCTGGGAAAC  
GAACTAGGGGTGGTAGAAGGGGAGGAGGGCGGGGGGTGGGAGTGAATGGG  
TGACGGGCACTGGGTGTTATTCTGTATGTTAGTAAATTGAACACCAATAA  
AAAAAAATTAAAAAAAAAAAAAAAAAAAAAAAGAAAGCCCTTGAGTGAA  
AAAAGTGGATCTCTCTTAGGCGAATGATACAGCAAGGACAACCAATTGAA  
ATAGACCAATCTATGATGGGTCTTATGCTACCTAACCTTTAAAAAATAA  
AAATAAGGAAGCAGTTCAAAAGCGTCTGGCAAACAATATAAATACAATAA  
AATTTGTTACCAGCCCAGGAAGAAATCAGGCTGCCTTCTAGTCCCTC  
CTCAGCCTTAAACACAGGAATGCAATGGGAAATCTGCAGGGAATGAATTA  
TTTCTAATGATTTCTATTACCAAACAGGTATTTTAACCATAAGGTATGAA  
TCAAACACAAAAAGAAAGACATACTCATGTTCTTTCTTTAAAAGCGCTCT  
TTGGAGGCAGTCCTTAGCTAAATGAATCCAAAAAAGCCCTCAAAAGTAAG  
CAGTTTATAAAGTGATATTAGTAGAAAGCACAAAATCCATTTAACTAGT  
TATGAGAAATCAAGTATTAAGTATGATTATTTTTTAAAAGGCAACTAT  
TGGGTGACTCAGTTGTTTAAGCGTTTGACTCTTGATCTCAGTTCAGGTCT

TGATCTCATGAGGTCAAGCCCCATGTTGGGCTCCATGCTGAGTGTGGAGT  
TGATTTTAAAAAAAACAATAATTATCAAAAGAACAGATACATAATGTAA  
AATGATTATCATAAACAAGTTCTAAATATCCAGTTCATATCCCCCAAAGT  
GAGGGACTGGGATTTATAGAAGGACATAAAAAATATGCTAATTTGCTAAAT  
ATGCTAACTATGCTCATCTCAGATAGGGTGGAGTCAGCAAATAGCATTTA  
ATCACTGACATTGGTAAAGAGAAAAATATCAAGCTCAAGTGTTCATTTT  
CCCCAAAAAATAAAAGGTGAGCATGCATAGTGTTAAGCAAAAGTTATTAT  
TTGAAAATCTGAGGTAAATACCTATGCTGAAAAAGTAAAAACAAAACCA  
TAGGAATGAAAATATTGAACTTGGTATCCAACTCACAAAATTATTAGTG  
ATGACAATAAATATAAATGAATTAAAGCCCCTCAATTAAAATATGAAAAC  
TCTTATAAATCAAAAATACAATCCAGAAATTTGTAAGAAATGAGGCAGTA  
TGGAAATTTGGATTTGTGAAACCTCATCTCCAAAAATAACAAAATAAGAT  
TTATGAAGTAAAGGTAGCAAAAGAGGTACAGTTAATGGTGAGACAACATA  
GGGCTTTTAGCCTAACATAAAACAGTAAAAACACCTTATACAATCTTCTG  
TACTCTATATAAAAGTGTAGGACAAATTGGAACCAATTGAAAGATGTCCC  
ACTTAAGAAGGAGCAGAAGAGAGCAAAGTGAGATATTTTTTAAAATTTTT  
ACTACCATCCCCTCGAAATTAGTGGAGCCAGTGAAATGTATGTGCAGTCAT  
TTGGACAAAGAAGAGAAAAATATTCTCTTTTGAGCTTTTCTTTGCTTGTG  
GAAAACCATCAACTAACTACATAAAAGCACATTCATGAAAGCTGGAAGGA  
GAGTCAACATTAACCTCCCCGCTCTAACCTGTTACTCTCTGGAAAAATG  
GTAACCGTGGACAGACCAGTGTATGATCTCCTAGCTCTAACTCATTAGCA  
GGAAAAAAAATTTGTAAAAAAGAGAGAGAGAGAGAGAGAGAGAGAGAGAG  
AAAGAATTGTTTCAGCTACTCCAAGTGACAAATTTCAATCCACCAAGTTTT  
CTAACCTCTGAAGCAAGAAGGCTGAAGGCTCATCCCCCTGGGATTGGACG  
AAGGAAGGGTTCAGAGTGACCTCAGTACAGGACACGGAGTATAATTCAA  
GGCAAGGAACACGCTGTGGCTCCACACACCCAGTGTGCTCGCCTTTCTC  
TATTTTGTTCCTTCAGTTGACTAAGCATATAAATCTTAACACTCATA  
CTTCAACTTGATGTCATATTGGAAGCATTGTATCTGTATGTAGGTAAAG  
GGATTACAAAAGAGAAAAATAATCAAATCAAATCTAAACACAGTTTGAA  
AAGTAAACAGGTGAAAAGAGTCAAGCATTGAGAGAGGGATGGTTAATATA  
GAGCTAGAGTAAGTAAAGATTATTGCTATAGAAAAAGGTATATTTATTA  
ATAAAATGCAAAGTGAGTTTCCACAAAAAGTTACAGATAGCGTATACAA  
AACTAGTTTTGGATAAGAATGGCTTTTCAAATCCTTCAGAAAAAGACAGT  
TTATCCGCAGTCACAATTCACACCTTACTTACAGGAAACAGTTTGAACC  
TTCATATTTTATATCAAAATAAATTTCAACTTGATAAAAAGATAGATCAA  
AATTTTTTTAAGATTTAGAAATAAATTTGGTGAATATTTATCTGATCCT  
GGTGAGGGAAGTCTTTCCACACAAAAGCAAGGGAAGGAAAAGGAATCATA  
GTAGAAATGATAAAACATTTTGAATATGTAAAGTTAAAAACTTGGTATT  
TTAAAAAAGATATCATAAAACAAAAGTAACTGGTGAGCAAAAACCTGGGTA  
GCATTTGGGAGAGAAAAAAGATTTATATGTATTCTATTGTATGCATGAAA  
ATTTTCACTTAACATGGCACATTGGAAGTGAATTCCATGAACAGTTCTGA  
GTTCTGAGCAAAATTTTGTAGTAGGCATGCTTAATTGCTTCTTGATTCT  
GTATTAGATTTGGGGCAGGGCAGCCCGGGTGGCTCAGTGGTTTAGCACCG  
CCTTCGGCCAGGGTGTGATCCTGGAGACCCGGGATCAAGTCCCATGTCT  
GGCTCTTTGCATGGAGCCTGCTTCTCCCTCTGCCTGTTCTCTGCCTCTCT  
CTCTCTCTCATGCTCTGTGTCTCTCATTAATAAAAAAATAAAATATTTTT  
AAAAATAGATTTGGGACAATTACTTGAAGGCAGTAGCAGGATGAACCTTAT  
AAAAGAATAGATTAAAAAATAAAATAAATAATAGATTTTGGAGTTTGAC  
AAGTCATGTTAGAAATCCTTCAAACATCCACTAGTCCTTTGCCATGTGTA  
TGTCACACAACCTTCTTGAGTCTCAATTTGAAATTGTGACATTTGACTAA  
TTGGTTTTGTGTCAGTATGAATGAATATTAGTTTTTTTCTCTCTCTTTTAT  
CCCAAAGGTTAATGGATTCCAAATCTCTAAATAACACATCTTAAAGATAA  
CTCCCTAAACTAAGATGGTTGGCAAGGTATCCTATGTGGGTAAAATTGGC  
CTGGATCATTTGGTAAATAAAGTTTTATCAGAACACAAGCATACCCATTT  
TTTTTACATGTTGTCCACGCTACCCTCACCCTATAACAGCAAAGTTGAAT  
CATTGTGATAGAGATTTTCTGTCTGCAAATCCTAAAAATAACATACGGCC  
CTATAGAAAAACTACCTCTACTCCTGGAGTAACTGTATTGTGACTTATT  
AGTCGCTAGAAGACAATGCACTCATGAAATCTATGAGGAAAGCAAGATTT

[illegible]

GAGCACACACACACCCCTTCAGAAGCTCAAGAAGGCTCTATATTAATATT  
AGCAGTAGTTGTATCTAGGCAGTGGGATTTCTAATTATTTAAGATGGTCT  
GTTTTTCAGAGTATTAGTATTAATTTTTTTTTTCTGGAATCATGATGTACT  
ACTCAACTAATCTGAAAGTTCTAATGCAAGATTTGACCCATCTTCACTCA  
GATACTTCCTGGAAAAATCCAAGTTTTTCAGTTTTAGAAATTATCTTCTCT  
GGGTGATATTTCAGAATATGTGAACATGCACATTTTCGCTATGTACAGTG  
GAAAAATTTCTGAATCAAATTTCCAATTTAGGTAAATCTTATGGAATACTT  
GGAAGCATAGATATTTCTAATTTCCCTACATATTCACCGAGAATGACATGA  
GGTGGTTGTGTTGGGGGAAGTGAAGAGTTTATAGAGACAATGGTAGA  
GCTGTGCTGATAAGTTTGGGCAATATTCATAGATAAGAGTATGACTAAC  
TTCTGCTCAGGTAACAGTACTCTAATTTGAAGTGGCCATTCATAATTTTG  
TCTCCTATTAATTGTTTTTGACCTTTGAAAAAGGAATTTCAAGAGAATGG  
CAAAGTTACAAATCAAACTTAAATCAGATTAAGACAACGAGTGGGGACCT  
GGGAGAAATTAGTGATTTCTTTTATATTTTGGATGAATTCAGCTCAATCC  
TTACTTAGATATCTTCCTTATCTGTCTATGGCTTCAATTATGTAAAGTCAT  
CCCAGGAGTCAATACTCTCCCTGCATTTCTGTTTGTAGCAAATTTCTGGC  
TACTCCGTAGCTTTTACCTGGAAATATACACCTGTCTCATTCACTTCTCA  
GAATGGGAAGCCATCCATGCCTTTCATTTCTGAATCTCTTATATTAGGT  
TTATTGAGAGCAACCAACTACAATGAGGACCTAGTGTGTGCTGGGTACCA  
GGGCAAGTGCTAAGGATATAGTGGCAGACAAGCTAGGGACATCCCAGTGT  
TCCAACAGCAATCACAGGCCGTTATGGGGGAAACACAATATGCTATGAGA  
TCATTGGAGGTGATGGAGGGAGTGTATTGCAGAACAGGAAATTGCTTGTA  
CAGAAATTTTATAGAGAAAGTTATCATGTTGAAAAATGGGATATTTAAAAG  
TCAAGGAGCAGACTAAGATAGAGTTTTTTTGTGTTTCTTGAAAAGAATG  
GCTTATAGATTATTTTGAAGTGCAGAAATAGTTGCTGAAAAGGGGTCTTTT  
AAATAAATTCACACAGGGCATGACAAGTAGAAAGTGACAGTAGTGACCAG  
CAAGAGGGGATAATAACTATATTCATCTTAATGTGTGTGTGCCAGTTCTGT  
TTACACTGATGCTGGAAATTCAGAACTTGGGATCTGGGATAAGGATATG  
CTGAAATGAGTATATGGAAGTCAAAGGGTTTCTGTCTCTTTTTCTTTTGT  
CCCTTTCAGTAACTACACAGAAAAGTTGCTTTCCCTGGGGTGCTTCTAGGG  
GACTTAGTTGGTGAAGTGTCTGCCTTCAGCTCAGGTCATGATCCCAGGGT  
CCTGGGATGGAGATGAGCTCTGCTCAGGGCTCTGTGCTCAGTGAGGGGCC  
TGCTGGTCCCTTTCCCTCTGCCCTTCCCTCCCTCCACCTCATGCACACT  
CTCACTCTCTCTTTCTTTTAAATAAATAAAGATATAAAATCTTTTTTAAA  
AGGTGAGGTGCTGCCTGGCTGACTGAGTTGGTTAAGCATCTGACTCTTGA  
TTTCAGCTCAGGTCATGATCTCAGGGGTAGTGAGAAGGAGCCCCCTCGAGG  
GAGTCTGCTTCTCTCTTTGCTCTCCTTTGTCCCTCCCTAGCTCTCTTGCT  
CTCTCTCTCTCTCTCTCAAATAAATAAATCTTTTTTAAAAGTTGTTTT  
CCTTCTGTACTGTACAGAACTTTTACTTATCTTCCCAGTCCTATCTGTG  
AAAAGTCTAAAGAGAAAGAACCTCCATTTGCAGCCCAACAGAATGTGGGG  
AGAGGGGAGGATTTTTTAAATAGATAACTCAATAGTTTTTTTGCATTTTT  
AAAAATTATTTTTTTTACTGAAATAACCCCTGAAAGTGTTAAGTTACAAAA  
AAAATTACTGAAGAAGAATATATTAAATTTGTGGGGGGAAAGGAAAAAAG  
ACACACCCCCAAATTTTAATACTAATATGAAGATCATAATTTAGCATAAA  
AGAATATATTATAGGGACTTGCCCATCCCGGTAAATGTAAATGAAATTAA  
TACAACAAAGCATAAACACACTTTGGCAATAAATAGGTTTTGATAAGTTA  
AATGAGCTTTTTTTTTTGTGTGTATATTGATGTGCAGTGACAGGTAACATA  
TTTGCTTTTCCAGTTTCTGAAAGTTATAAGAGTTTTAGGAACCAAGTGGA  
CAGGCATGCGTGAGCACTCTGAGGATAAATCTATGATATTTGCAAGGAAA  
ACGAAGGAAGAGAAGCCACACCGGTGGGCTAGGAGAAATGTGTCATACATA  
GGAATCCCTCAAATTAATCTCACTCAATCAGCTGAGTGAGAAAAGTGTCA  
CATTTCACTGACTACTCTGGCACTCATTTTCTCTCTACAAGCAAATACT  
AAAAATCAAAGCTTCAAACCAGACTCTGGCAAGATGCTTTCTCTAAATGA  
CTGAGCACATGACAATGAGTTTTAGTTATAACTGAAATTTTATATACGCA  
TTCATTTGGCAGCTCTGTGATTATAGGGTGGCCCTGGCTATATAGTACTT  
TTGTTCAAATAAAATCTTTTTCAGTGCACTTGACACAGGGAGACCCAATAT  
CCGTTTGTCAAACCTCTCTACTTTCTGGTGCCAAACAGATATCTACATGGT  
CAGCCTGCTGATCTGTTGATAATTTTACATGCTTGAAGTCAGGTTTTATG

ATCTCACCATCTGAAGACATCAAAACATAGAAGGCACCAGACGACGGCAG  
TCACTTGATATATCCCCTCTCTCATTTTTTGTGTTTTTGTTCAGGTTGATGG  
AAAAATGTAAATGTAGGTTTGGATATCAGGATGTTAGCACAAACCCTAGGG  
GGAAAGGGTAGTTTTCTTTGTAACCTGGCAGGCCTGGAATGGCCGCTTCT  
GACATCATGGGTATTTTTAATGAAATATTAATGACTCTGATTTTAATAGG  
AATTTTCAGCACAACTAAATTAAGCCATTGGAAAAGGGATATGGTCCCGT  
TAAGAACAGTAAAACCGTAAGCCCCCTTCCTGAAGAGTAGCTGTGGGTAG  
TTAAAGTGACAATCAATTTAACCAGGCCATATTGCTTTGTAAGTCTCTGA  
AGTGTGAAGTCCCAGCATGCCTGATGTATTTTCATTTTAATTTTCCTTTTGG  
ACAGAGCTATGGTTAGTGGGGAACCTCACACACAAAAAAGGGAAAAAAA  
TGTGCAAAAGAGGAGGAAATTATTTAACCCTTTCAGAAAAGCTATGCAATG  
CATTTAGTGAAGTAAAGAAAAATAAGCATGATTAGATTTCTCCTTTTGT  
TTTAAAGAAAGATCAAAGTGGAGCAGCATAGTAAGTCATGATGACCAATC  
TTACTGATAATTTCTGCTAAAAAGCCCTGAAATGCTCTCTTAACACTTATT  
TTCAGTTGTTTGTGTTTGTGTTTTTAAAGAAACTAGCGATTCAAACCAA  
ATCTTCCTTTGCTCTTTCTATATAAAGGAAGATAAAAAAATCATGTCATT  
TCGTATTATTTTTTTCAATCTCTCCTTGGAAATAACACATCTCAACGGTCA  
ATTGCTGATCTGTTGATAATTCTGCATCTTAGAAATCACATTTCAAGATA  
TGGCTTTTGGAGGCAAATCAGCTTTGATGTCTTCGGAATGGTGCCCTTGT  
CCATTTTTTACAAAAAGCCAGATAAATCTGAAGGACTTTTTTAAAAATTGT  
AAACGTTTCCTACACAGAAGGCGCAGCTACCTGCAGAAGTTTCTGTGAGA  
CTGTTTTTGTTCAAAGCAGTCAGGAGAGAAGATAGCAATTATGTGGTGG  
AATGTGGAAGGCAGAGTTAGATTCAGAGTCAGGAGAGCTAAATTTGACTT  
TGATTAGCTTTGACACAAATTCATGATTTGATATTGTTAAAGTCATTTGT  
CTCCCTTGGTTTCATTTTTTTTTTTCATTATTCTCTCCATGAATACTGGGA  
TGCATATGAGAGACAAAGCACCTTTTGAGATTTTTTGTGTGTTCAAAGTAT  
CAATTTTAATTTACATAAAAGATTAGCTATTGAAAAAAGGCAAGTTTTG  
CTGAAAGTGTGATATTCTTAATACAAATTTAAAGGTGGCTGTCTGTATTA  
AAATCACCTACTGGGATACTTTTATCCAAGGATTATTTTAATACCAAAAA  
TAATGAAGGACACGGTTCTGTGTCCTTGTATAAAGAATGGAAAGCATGAC  
CACATTCTTTTGATAAGAATAGCACATATCAACTCATCTTTAGTGAAAT  
TTCATCAAATTAATGTCTCTGAAGTGCAGTTGTGGTAATATTACTCATTC  
TGGTGGAAAAAATAGTCTAATGGCTCCCTAGACTAAAGATAGAATTCCT  
TTCCTAGACCGACCTTCAAAGCATTCAGGATTTTCATTTACTTAACCTTA  
ACGCTGTCCAATATCTTTTCCATTATTGCCAAACTGCACTCTTTTCTC  
TAATCTTGCTTACTCCTATTGCCTCTCTCTGGGATTCTCTTTGACATCAA  
CAGTAGACGTCGAAATGTACCCAGCATTCAAGGTCTAAAGCAAATGCCAT  
CTGGTTTAGCCAATCTATTGATTGCACATGATTTCTTCTTCTGATTCT  
CATAGTAGCCAAATTTTGTGGTCATAAAGAGTTAGCTTAAACATTGGCCC  
TACTAATTGAGGTTACTGTCTCACTTATTCCCCCTGAACTATGAGGCTA  
TCTGGAAGGTATTAAAAATGTCTTCCACAAAGCGTTGAGAGATGGGACGC  
ACATGACCAATCTCGCCTGTAGTATGTGTACAGTTCCTTCTATTTCTACT  
GTTGCCTTCTGTTATATCACATGTTCCTTTTTAATTTATAAATAAATAAC  
CTATTAATACTATATACTATGGGTAGAAACATACAGATATTCCACTATTA  
AATGGCACAGTATACATACGTTAACATTTTCGGTCTTGGCATAAGGAATTT  
CATTCCCCACTCCAAAGAGTCAGGAGGGACCAGAGCCTCTCTCTGCTTTC  
TTCTCCAGCCCCAGGGGGGTGGGGGAGTGGGGAACACATGGGCATGTGA  
CCTCAAGGCTTAACCAATCAGATCCTTGTGAGGATTTGGATCCTGAGCAA  
GTAAGACAAAGATGAAGAGCAGGTTATAACTCATACACAGAAGTGACAGG  
GACAGGGTGCTACAGCCACAGCATCCTGGCCAACATGTCTCTCCTACAAC  
GTATGGCCTCTCCCTTCTTGCCACCTCTGTCTGGTATGGTTTCCCAGAC  
TGTTACATCAATTGTGTGACGCCCTGGTCTACTCAATTTCTCTTTGCTT  
AAGAAAGCCACTGAAAGCAATACAGATCTCAAATTTAACTAATATCGACC  
TCGGAGTTCTTGAACGCAGAACAAGTGAAGTGAAGTGAATTCCTGGTTTCA  
TTGTTTTAGTTAGCTGGATTACCTCTCTGTAAGAATTTGTCAACTATCAC  
CCCAAGTATAGAAATGTCAGGACAAATGCTTGAGACTTTCTCCTTACTTG  
CCAGTTTTTGTGTTCTCTAGCTTTTTTCCAAAGATGACTTATGTTTTTAGC  
ATCACTGTAAACTCAAGGATACAAACATATGTGAAATGTTTCTAATACTT

GCAGCTCTGGTGCGAATAAAATTCAAAGTGTCCACCTATGTTTGCAGGG  
GCCTCTTCAATTCGACTTCTGAGTCTTAAAAAAAAAAAAAAAAACAAAA  
AACACGGTAGTTTTGGATAGCATCCCTGGTTTCTGTAGGCAAATATTT  
CTTAAGCGTATCTTATGTATTTCCCTGCTCAGACCTTGAGTCAAACATTT  
TCCTCAGAGACAGATTTTCTTGGAGACAATGGGTGCAACTTTTTAGTGAT  
ATTCTATTCAAATGTGTTACGTCTTCTGTTCTTTTACTCCCCAGGAAAAT  
GAAAATCTTTATATTGTAATCTAAATATTAAAAATAACAAAAGTGTA  
TGTTCTCCACAGTCTGCTTGCTTTTAAGTGAGAATTTCTGGATAAAACA  
GTCATTTTGGGGGGAGTTCAATAGCCAAAAAATGGTCCAAAGAACTTTAG  
ACAAAATCGAGAACAAATTTTGTAAAGGTTGCATCACTTTCTTGCAACAAA  
CAAACAATCTATGTTTGAATCAGTTAAGAACTCCAACCTAACCTGACTT  
TTAGAAAACAGGAAATATCTTCTATAACTGAAATGAAAAATAGGGATGTCA  
AATCCCCCAGTATTTTCAAGGCATCCAAAGCCCAATAATGTCACCAAGGACT  
CATGTTCTTTAACTGCTCAGTCTTCCAGTTTCTGGCTCCATCCTAAAAC  
AGTTCCTTTTAGGCTTAGGAGAGATGCTAGGTAATCCCAACCACTCTAAGC  
ATTACAGCTGACATGACAACTTCCAGGAGTTAGAGAGATAGATGGTGGAG  
GAAGCTAATGGTTTTACATCTAGTACGCATGTCTCTTAGCACAGAAGGG  
ATGGACTCCACCTAGCAACCTCATTTCCCTAACCTTTGCAACTGAGGATGA  
CTAAGTGACCAGGTTTCAAGGGCAATGGGATGTGAACATAAGCCATGCTATG  
GAAAGGAGATACAGTGCTATGTTTCTAAGTCACAGTCTTTTGAGGTTTTT  
GTTTGTCTGTTTTATACCACCTACCTCATCTGGCTAGGCACCACCACCAA  
TACACAGACCCTCTCTATAGGTGTCATTTTTTAAATTAAGAAATTTTATCA  
CAGAAAGTGCCTAAAACCTCTAAAGGTTTTTTTTTGTGTTGTTGTTGTTT  
TTTTTGTCCATGCCCAAGCCAATTAAATGCAGGAAAAATTGAAAACATCA  
TACCTATTATCGTGAATTCTTAGAATTATCAGGGCCTCTGCGCTTGAAC  
GGGGATGTGAATATGCTTCCAAACAGCACATAAGTATGTGGAATACTAAA  
CAAACAAAGTGATTGTTTGAAGGAAGAAAGTAGAAATTAACCTAGCGACC  
CTAATATAATTGCTATATTTAAAAATTTATCATATCTTATCCTCATATAA  
ATGTGAGAATACATACCATGCAATCATATTCAGTGTTGCTTCAATCACAG  
TGTGTAGTGTGATGTGTGTGGGTGTGTGTGAGAGAGAACAACAGATAGGC  
ACACACCCAGAGCCCCACGCACCTGTATAATATTACTTAATTCATAGTGT  
ATGTTTAGTTTTCTTCTGCTTTTTCTTTTTTTTTTTTAAAGATTTATTT  
ATTTATGATAGACATAGAGAGAGAGAGAGAGAGGCAGAGACACAGGAGGAG  
GAGAAGCAGGCTCCATGCCAGGAGCCTGACATGGGACTCGATCCCGGGTC  
TCCAGGATCACACCCTGAGCCAAAGGCAGGCGCCAAACCGCGGAGCCACC  
CAGGGATCCCCTCTGCTTTTTTCATTTAAATTATGCATGCATCTCCATGTG  
ACTAAAGCTTTTAATTATCATTCATTAGTGCTCACAAAAAAATTCATTG  
AGTAAAAACACTGCACTGTACTTTAATTACATCACCTGACCTTAGTGGCC  
CCCTACCTGTGCAAACTAGAGTCTCATTTGTTTCCAAGGAATGTTGTAAT  
CAATGCTTTCATGGGTATGACTTTTTTTTTTCTTTTAGATTATTTTATCA  
GAAAACATCCCCAGAAAGTTCAAATCACAGTAATCATTTATTGTTATCCTT  
ACTACATATTGGCAAATTACTTTCCAAAAGTCTCTACCAAGTTTACTCT  
TCGAATAACATAAGAACATAACACATAAGTATAACCTTGCTCGGTTGGAA  
TTTACGTTTTTAAATTTGCCACCTTAATGAGGGTAGAGTGTACATCATTA  
TTAATGCCATTTACCATTATTGTTAAATGAGACAAAAATTTGCTCTGTATA  
TCTTTTTCCTTGATCTCTGTTTGATTTTCCCTCGGGATTTTAATATTTT  
CTTACCAAAGTTTTAAGTTGTTTTTAAAAACAAAATAGTCCCCTTTTGGAT  
ATATTTATTTCAAAGGCAATCTGAAAGCTTAGACAGCTATTAACAAATAG  
TTGGCAACTGGCCATTTTTTAAAAATTTCTTATGTATATGAACACACATT  
CATCATTTGTCCTTTTAGGATCCACTTGGATATTTCAAATTACTTATTTT  
TCCTCGTGTAATTTAGTAAAAATGTATAAAGTTATAAGAAAAATTCATT  
GAGTTTCAAATAAGATAGCATCTAGTACACGACTTCTTACCAGAAGA  
GGTATAATCATCCTATTTTAACTTCCTTCCAAGGATATTCTATATATACA  
AGTTATATATTTTTTTGTCTCTCAATTACCAAAAAATATCCCCAGAGAG  
TAGTAAATTTTCTAAAGGACCTGCTCTTTTCTTTATCCTGGAAGAAA  
CTATGTACAAGATTTTATGCTTACCAGACTTTGAGTGGTCAAGGAAGCAC  
ACAACAAATATGGATGCGTTTTGGAGTTTGGGGAGTTGTCTTGTGTTTATC  
CTTCTCCACAAACCAGATTGAAATTTCTCCCTAGAAATCTTGATCTTTTG

CCGTATCATTTCCCAACAAATGTGGCACTGATAAGTATTTGAATAATTCT  
CGCATCACCTCAATTATTTTTTTGTAACCATCTGAAGTTAGCGACAAAAAC  
TATTTTCATCATTGTGGGGGCATCAGGTGTGTTGGGATGAGAGGTAGCTG  
CCGTATCAAATGAAGAATATTCGGATGATGCACGCTGAGTGAGGCACAAG  
CCACTCATGTGGGTGGCCAGGTAGCTTTCTCTGCATCCAAGCTCCAGTTT  
GAGGAAATGAAAACCCAGGGCCATTTCCATGGAAGGAACGGTTTTAAGA  
CACCCATACGAATGAAGTAAAGTGACAGGATTTGTTACTTACAGATTCCCT  
GATATGGGGGGGCTGGCAGTGGAGAGGGCAGTGAGCCAGGGCATTCCCCA  
TGCCAGGTCAACAAGGGAGCAGGAGACCAGACCAAGAGCAGGGTTGCGTCA  
CTGGTTACTGATAAGGTAGTTGGGCAGAGGCCACTAACTTTTCACAGACT  
CAACTCCACGTGGTTATTTTTAAAAGGTGCCCCGGGGAAAAGCAGAGCAGGA  
ACTTGGGACAGGAATCCTAAACTCAGCTCCTTCTCTAAATGTCCAGACTC  
TGGGTTTGAACAGGTTGCACACTGTACAATACCTGAGCAGTATCTCAGAG  
CGGCTGTTTTTCTCATGACATCAGAGGAGGTGAAGAAGCCCTAGCAGGGGT  
CAGACCACCCGGAGGGGATGGTCTTGGAACCATAACGTGTGTCAACCCTGA  
TGTAAGTCAGTGGGATAATGCCATCGTTTTCCCGATGACTTTTTTGAACTG  
AGGAACTGACACGCTCATTCTGTTGGAAGACGTGTCTCCTCCAGGCTGTG  
ATGGCGCATGAGAGAACAGGTCAGAAGAAATAATTGGTACTTGATTCTT  
AGCTGCTTATCGTTGTGTTTCTTGATGACATAAATGGTTGAATTTGTAA  
TACACAAAACCTTTGATTTTCATTTTAGAAGAATTGTATGTCAGACACACCC  
CAATGGGAATCACTCATTCTAGGACTTTGGCCTTTGTGAGATTGACCTTC  
ATCCTAGAAGAAGAGACACACACGTGTATTAGGGTAGAGCAGAGAACAAT  
GGGAAATACTGAAATGCATACAAGCTCCATGGGAACTACATCTTGAATCT  
GGTTTACTCTCTGCCATAGCTCCAATGTTCTCTGAGCTATGCCTAAGACCT  
AACAAATATTTGTTAAATTCCAGGAGAACACACTGGGAAAAAAGTCTTAG  
GAGAACTTTATTTCTTTGGGAAAACATTTCTGTGTATTGTAAAAGAATTA  
CTTACCTTCGCGCACTGTATGGGTCTGTCTGACATATCTCTGAAAAACAC  
GACACAATGAATTTGAAATAAAATATACAATTGGAAGCTAATTTTCTTAG  
CATGTTTTCTTTCTGACTTTAAACAAATAATTATGAAATGAGCGATTCC  
CAATAATGACCACACAATCTAAGGTTTTGTATTTTTCTTCTCTGTTAACC  
CTAGACCCTGTTATTGAAATGGAAAGTTAAGCTGACATTTTTGCAAGTTT  
TTTTTCTTCTTTTTTATAGTCTAAAGGTTAATGAGCTGTCGTGTGGTTTA  
GTGCTGTGTGTGCTAAGCTAGCACCTAATATGTTAAGTTGGGCGTGATT  
AAGCCTTCCAAAGAAAAGTGGTCTCTGACAGTATGGATGGGGGCAGGGAG  
GACAGAAGGGAAGAAGCCAGTACCATTGTGCTCGTGTTATTGCTCAAGAA  
AGGTGGTCCCTGGTCAGCGCACACTGCTGTTTGGGACTTTATATACAAGCT  
GGTCTCAGGGGGAACATAAAATATCCCACATTCCATTTGAGAGGTGCTGG  
GTTATAGGTTATTGACCAGTTTAGGGATTTATAGCTGGAGTCAGTAATTG  
TTAAGGAAAAATGGCTTGACAATTTATTATAGTGGAGACCTGCTGGAAA  
AGTTAAATATAGATTTACCTAAGAACTAAGTTGATCTTAGTAATAATAGG  
TATGTCTGCGTGTGTGTGCACGCACAGAGTTATATTCTTATACTTTAATA  
GAGACTATGCCTTTCATTTTCATAGACAAGTGTTATAGTATTAATTCAGG  
TGCATGTATCACAGGAATAAGAATACTACATGCTGTTTCATAAGAATATA  
TAGGTTATTGTATATAACTGAAATGCTGACAAATAAATCCTTTCTGAACA  
ATGAGAAGCTGTTAATTGGTTTCAGATTTGAGAGTAGTAGAGGAAGATAT  
AGAAAAGAATAGCTACTATTTTACTTGTGGTTTCTTATCCCACCACCAC  
TTTGCTCCTTCTCCAAAAAATATGACCACACAATTGAAAATCTGAACA  
GGGACACCTGGGTGGCTCAGAGGTTGAGCGTCTGCCTTTAGCTCAGGGTG  
TGATCCCGGGGTTCCAGAATTGAGTCCACATTGGGCTCTCTGCATGGAG  
CCTACTTCGCCCTCTGCCTCTACCTCTGTCTTGCCTCTCCCTCTCTGTG  
TCTCTCATGAATAAATAAAATCCTTTTTTAAAAAATAAAATCTTAAT  
GAATTAAGCAACTAATTTTAAATTTACAGATTTTACAAGTAGGAGATT  
TAATTATACCCCGATTCTTTCTGATGCTTAATCCTGAAAGAACACATAG  
CTCAAGATTTAGTGCTAAAATTTAGTTTGATATTTTATGCTGACTTCGA  
ATATTTTGGAAAAAATCTCTCTAAAAAACATTCAACAAGCAGGTGCTAC  
TGAAAAGGTCTTGGGCAAGTTTCAAGTAAGAATTGTGGATTTCTGTTTAC  
TTGAATTTTACAAGCGACAATTGAACGCCTAGTGTGCACCCACCAGATGA  
GTTGTAGGGGAATAGCCTCAACATATAGGCCTATATCCCCTTTCAGATAC

ACAAAGATGAAACCAATAGCATAGAAAAATAGAGAAGACAGGGTGCTTCG  
CTAGGGGAGAGGATCACACCCACAGGAGACACCTCCTGGGAATTCTGCAA  
TGCATAACTCTTCACCTACAAAGAAACGACCCAGAAGAGATCCGACTAAA  
ACCCCTCTATACTCAGCCTGCCACATCTCATCTTTGTCCCCAACACAGA  
ACAAGAACCAGAATTAAGAAGAGGTGAGCTGGTGTCAATTACAAATCTTC  
GGGAACAATGTGGTTACAGAGAAGTCCGGGGAGAGAAAGAATCAGAGAGG  
GTTTCTACCTAACAAACACCTTCGCTGAGCAAAGACAGGTGCTTTCCACC  
GCAGAGTATGTTACACTAAATTTACCCAGAAAACAGGTATTGAGTGCCT  
TTCATGCATCCAACCTTTATTTTGTGAGGCTACGTTGATGAAAGAACACAA  
GCAAGGTAGTTGTGTTATGGAACCTTGTTCATTTCTGTGAGGGAAGACCA  
AAAGTAAACAAGTGATAAGTGATCAGAATTGTTTCTTAATGTCACAGTTA  
ACATAAGAGACTGAGGTGATGATAAAATCAAAAGTAACTGGAGGTGGCCA  
ACTTAAGGAGGTTCTGAGAGGTCTATCATAAAAAGTGACCTCTGGGCAGA  
GACTGGAAGGTTGAGGACAAGCCAGTGGGGATGGAGCAGCCCTCAGAGAT  
GGAACACCCATCCTGTGTTTATAGAGAATGAAAGGCACAAGGCACAGCTACC  
AAGTCCTAACTTTGTGCATTAGACTTTTATAGAAATAATTACCATGACTAAT  
TTAGATAGCTATTTAACTACCTCCAGAGTTTGAAGGAAACATGAGGCATT  
TTGGGACTCCTGAAAACAAGACCTGTTGTACATACAGAAAGTATACACACA  
AAGAAAAGGATAATAATTTAGAAATGAGGTAAAAGAGATGTCACTAGATG  
ATAAAGCCAACTCATTCTGATGGTCAAGGTTGAAGATACGTAGATGACA  
AACAGTGAAGATTAGGGGAAATGAATGGATAAAATAAAAGTATTCACAGC  
TTACATTTTCTTATGTGTCTTACCAGAGAGGTAGATTTGTGCTAACAGGT  
GCTCTCCAAGTAAGGTAGGTCCAGAATGAGGTGCATATTTCCCTCCCTTCTT  
TCTTAATGTTTATTTGTTGATATGGGAGTCAAACAAAGCATCCTTTATCT  
CATGAGTAGGTGAACTTCTATCCTAGTTCATGTGGGCTGCTATAATAAA  
TTGCCATAAACCATGTGGCTTATAAACAACAGAAATTTATTTCCCTCTCAT  
TCTGGAGGCTGGAAGTCCACCATCACGGTGCCTGCAGATTCTATGCCTGG  
CAAGGGCCTGCTTCCTAGTTCATAGATGACCTTTATTTCACTGAGTCCTT  
ATATTGGAAGGGATTTCTCTGGAAGCTCTTTCACAAGGTTGCCATCTCAT  
TCATGAGATTCATGACCTAACCAACCCCCCTAAGTGCCACCCACATACC  
ATGACAAATGAGGATGGGTTTCAATGTATGAATTTTAGAGGGATACAAACA  
TGCAATTTGTGCCACCATCACTTTAAAATTCACGTTCAAGCATGTTAAGGC  
CTTGCTTGAGTACTCTTGGGCCATGTAGCACCATGCGAGGGGACACATGA  
GGCCATGGGACAGACATGCTCCAGCTCCTAGGAGCATATCCTTCCCTAGG  
AAATTACAAGGTGTTTCAGCTCAAAATCAGTTCCAAGCATACCGCTACAC  
TGAGTTCAAAACCTAATACAGTAAGAGGTAAATGGCATTAATAATAGGCC  
AAATTCACTACCTTTTTTTCTGATTTATTGTCTTTATTTACTTAAGGTGC  
ATTCATTTTAAAGCTGTACCGCCAACAGGGTACACGTAATATTCCCAAAG  
CTGAGTATTCGCCCATAAGCTGGAAGCCACTGAACGGTCATTACAGAGTG  
TGCCATTTATTCCACTATAACCTTTCAGCTTCAAATCTGCTCTTTTGGG  
TTGGTTGCATGATGTGGGGCCAGGAGTCTACCATCCACATGCCTGCTCTT  
CAGCGCCATGTGGCCAGTGATGGTGAAGGTGAACTGGGCCTTGGGAGGCT  
GATGGGGCCCCCTGGCTCTGTACCTGGGCTTCTGTACGTTTCTGTGTTG  
TATTGCTCCTGTGCCATGGTGCTTCATTCTGACAGCAGCTGTGAAAGCCA  
GTCTGTCTCCCTGCGCTTGTAGACCAGCCCCAGTGTGCCACCTGTCATT  
AGCCATCCAGCGCCCCCTGCCCAAGGGTCCAATCCTCAATGCCACCAGCT  
TGCAGATCTGAGCTCAGAGACTGTCAGGACCAGTGAGCAGTGACCCCTTC  
CTCATAAGTCTGCCAAGTGCACTCCTCAGGCTTAGGAGTGTGATTACTTC  
CAATGTTCACTAGTCAATGGGGTGGTGTACCGGTGGTGACATTGCAGCGA  
CTTCTTCATGCTATCTTCATGTCTCCTGGGAGTTCCCTCAATATCTGATTTT  
AGTCCCTTTACTTCTCTGTGTTAAGTAACTCCTGTGATTCTCTGCATCCTG  
TCTAGGTACTGAGTGATCCCAGCAAGCAGATCAAAGGTAGCATTTAGGGG  
TGGATCAGCTGAAGAGATCACAGGAGCACACTCAGGTGCCATGCGTGTTC  
CCCCCTGCCCATTCAAAATGATCCACCATGTACTATACCTCCTTTTTTGT  
GGGCTAGGTACATAACACTGTCACCGCTTTTCTCTTACCTTCGATGGGACA  
TCTTGGTAGACTCGGACATTTGGACTCCCACACGTCACTGAGGATGTGAG  
TCTCTAAAATGTGTACCGTTTCTTTTCCATTCTGATTGTTTCAAGATTCA  
AACTATTTGGTGCAACAGGTCCAACAAAATGGTCAAAATAAAATATTAC

TGTATGGGCTCAATGGCAGAATAAAGATGAGAGTAAAGAGATTACGAACT  
TGCAGATGAGCCCGTAGATATTATCTAATATGAAGAAAAAAAAAAGAAAG  
AAATTAAAAAGCATGAAAGAAGGTAAGTGTAGGACAATACTAATAAAGAG  
TCAGTACACATGTGGAAAACATCTGAAAACACTACTATACGGGTTTTAAAAA  
CTGAATGGATATTAAAAAGATAGGTTATTACTGTGTTATGAGCCAACTGA  
GATGATTGCTAAAACAATCCAGGGGATTTAAAAAAGACCCAGAATCTCAA  
AGAGTAATATTAAAAATGTTAAGGATACAACCCACAATTACTTGGATGTAA  
TTATGAAAAATCAAGAAAATCTCAACAACCTTGTAGGGGGAGAAGTAGATA  
ACACTAATGTGGAATGATCAGACTAATTTAAAGTAACATATCATAATTAAG  
CTCCAGGAAGTAAGATAAAATGCTCTTGAAATGAATGAAAGATAGAACGT  
CTTAGCAGAGAAAATAAGATATACGAAAAAGAACGAAATGAAACATTGAGA  
ACCTAAAAATAAAGTTATTATTTTTTTAAAAAGAATAAAGTTAAAAA  
AATCAATAACAAAATGAGATGACAGTGGAGTCAGAGAAAATAGATCAATA  
GAAATTACTCATTCTGGAAAAAAATTGAAAAAATAACAGAGCTTC  
ACGTACCTGCAAGACAATTCTCAAAGTCTAATATTCCTGCCATTAGAGTT  
TCAAAAATAAAGACAAAAGAGGGTGGTACAGAAAAATAGTTGAAGAAATA  
ATGGTTGAAAACGTTGCGAATTTTGTAAAATATGTAAATTTTCAGTATCG  
AGGCTCAGTGAATCTCAAATAGGATGAACTAAAAAAAAAAAAATCCAC  
TCCCAGACACATCATAATCAAAGTCTATAAACTATAAGCCAGGGGGTGA  
AATGTGACAGCAGCCAGAGAAGGAAAAATGAAATGAAAAATTACATGTA  
AGGAAGCACCATTTGAAAGACTCCAGGTTTCTCATCTGAAGACAAAAATA  
AACATACACAAAAGTAGAGAAAATTCATTTTATGCGTATTTCTAAAATG  
ATGGATCAAATACATTTTGGTGATGAAAGTTAGTTTTTTGAGAAGTAAA  
GCAACCAAACAAAATCCCCGTGATGATAGGAATTCCTAAGTTTTTACTC  
TTCTTTGAGATCAGCACTTAGATGGAAAGAAGCATAGATAATGTGAACT  
TTTAGTTTTTTCAACTTAATGTAAAAATCTTATCTTTGAATGAAATATGT  
AGACTTATATTTTCTGTCTAAAAGTGCATGAAGGGGTATTGTATATAA  
TAGCAATATTTCTCACTGACCACCAAACCTTTAATGGGATCTTTATCTTAA  
ATGTGGTGACATTATTGAAGAGAGACACTTTCCTATATAATTGTATTCTA  
TAATAGTTTCTAGCTAAGACATACATGTTTGTAGAGATTTGCTAAATCAC  
AGAAAGAATGAGAGATCCTATCTTTAAAAAATGTGTTTGTGTTGTTTTT  
TTCCCCAGAAAGAGAGAGCGGGGAGTGACAGAGGCAGAGGGAGAGAGATA  
GAGAGAATCCCAAGCAGATTCCCCACTGGGCATAGAGCCCAACATGGGGC  
TCAATCTCATGACCCCAAGATCATAACCTGAGCCAAAAACAAGAGCCAGA  
TGTTTAACCCATTGAGCCACCCAGGTGCCCCAATAAGGAGAGATCCTAAT  
GAATAAACATGTGATGCAAAATATATTGTTTTTCAATATTCTCAGCATTT  
ACTGTGTTACCACTTAACAAAAATTAACAGTTAAGAAAAGAAAAAGATG  
ATCAGAGATAAGAAACAAAGTATGGAATGCACTTAAAAAATAGATGAA  
GATTGGTATAGGAAAGATAGTTTGACTTAAAGTGACCTTGAACCTCATA  
ACCACATGATATAAAAATCTCCTAATCATGCATAAGCTGGCAAAGGCTTT  
CTTCAATATTTCCCTCTACAAGGGTGTAAACCAATCTCCTCTTTATGGTC  
CAGACTGACATTTTTGTCTCATGAAAGATACAGAGACTCGAAATAATTTT  
ATCAGAATGGACTTTTTAAATATGTTTTTTTTTAAAGTGACAGGTCAAT  
ATTTTTTAAAGTGTATCTTTAACTATTTTCTTACAAAAACACATTGAGA  
GATGGGCACTAATTTTGTAAAGGAAACAACGGAGGAAGTAGCATGTTTTTA  
AAAGCCTCCCAGCCATGTGGCCGCTGCTCTGTGCCTTTTGTCTCAATGGT  
TTCTTGAGCATAGGTGAAAAACACGACTCTCATAATATTACTTGAGCCTT  
CTCTCTTCTTGGTCTCTTTTAGGACGGTCATTGGGGGAATCACCAGATG  
GGAAGAAAGCTTTCAAATCCATTACTCCTTTTCTATCCCTTCAACACCTT  
CAGATGTCCAGTGGGGTTTTCACAGGTTCTAAGATTACTTTAGTGATTCA  
GCAAAGCCCTTTGAATTGTGTTTACAGGAAGGGAATACTATTCTCTTTCTAA  
TTCTCCTAGGCATTACCTTTCTTCTTAAGAATACAGACAAAAAGCTAA  
AATATTACTCCTAGTGAATTAAATAAAATAATCACTATGGAGCTAACCCC  
TACATTTACCAAGTCCAGTGAGCAACAATGAAACAAGAGCGGGGAAGCAG  
ATCATCAAACAATATTGACTTACATAGGTAAACACTAACCTAAAAGTCC  
ATGGTGACAACCATATAAATGTGGAGAAAACAGGGCAGCCCGGGGGGCT  
CAGTGGTTTAGCACTGCCTTCAGCCAGGGCGTGATCCTGGAGACCCGGG  
GTCGAGTCCCAGATAGGGCTCCCTGCATGGAGCCTGCTTCTCCCTCTGCC

TTTGTCTTTGTCTCTTTCTCTCTTTCTCATGAATAAATAAATAAATAA  
AATGTGGAGAAAACAGAAATTAAAAGCAGATAAAAAATAGTCCCAACTCTG  
ACGGTAATCTGAAGTGGGGAGCTGGGCAGTCCTGTAGGACTGGAGCCCTT  
AACTGCTGGGATCTAACAAAACTCCAGGGAGATAGAGTCAGGGTAGAAT  
TGAATTTAGTGTACCTGACTAGTGTTAGAAAAGTGCTCAATGGGTGGCAA  
GCCCACACATCTGGTGTGAGAAGGGAGTTGTAGCGTGAAAGTAGAGGAAA  
CACATTGAGTTTTCCATAGACATAGGAGCACCAACATTATTTGAGAACT  
TAATTATGACTGTCCTTTGTAGAGAGGTGGCTGTCCTCTGATTAAAGGAG  
ATATTGTTACAGAATTTGGCTGTTGATGGAAATGGGACTGGTCGAATGTC  
AAAATAATAGGGGTGGAAGGTCATTAAATCACCAGAGACAAGATGGGTGC  
AATTACTATAATGAGAACAAAGTGAAAGTGATATCTAGGGAGCTTGTTCT  
ACAGAGGGTTGTACAGATGGGAGTCTCTATCTCCACTAAGAATATGAAGA  
TGGGGAACAGAAAAAGTATTGTTTCAGACTTTGCAATAAAAAAGTAAAGGA  
TGGATGGGTGACCAGGAACTGCAGTCTGCCATAGTAGTGAAATATTTGG  
CCAAGTTTTGGAACCTGAGTCACTTTGTAGATCCAGAATCCATCAACAGT  
AAAAGAACCTGAGCTCTCATGAAGGACACTACAACACTATGTCAACTGTA  
TTATCAGACATTTCAAGGGTTTTTCAGAGATTTTTTGGGCAAAGGGTCTAAGA  
TCATGTGAACACTCAGTAACCTGAAGCTTCATCGTGGCCTCCCGTGGAAT  
TCTCACAGAGGTCCACCTCACAGTGAGTCCCAAATATCTGCGGACCTGCC  
TGATACCAGGTCACAGCTCCCAAAGGGATAAATTAAATAGGCATCCCTGA  
TATTTGACAAATTATCTACATTGGTTTTGTGGGCATGGATCGGAAGATGTA  
TTACCGTGGGAGAAGCCAAGTGGGAACTTGCCCAAGATGGCAAGTCCAA  
CACAATTCTGCATCTCAAGAAGGAAGAGAAGAGATATTGGCACTACTTTT  
GATGACCAAAGAGGTCTAAAAACATCAGACAGCCCCCTCAAGGTGACAAC  
GAAATGCCAATCACTTAACCAAATAACAGCTCCAGTTGTAATAGCTCGTT  
TTATAATGTCTACGCTAGAGCAGATTAAAATGGACTCAGGTACATGCTGC  
AGCCTTTCATTTGGCAAACCTATATTTCTTTTGCATCCTTCTCAGGCAGAAA  
GCTCAGAAATAATTCCAATTAACACGGGATGGGTAAAAGTAAGTACTTTC  
AATCTTGCTTCCCAACTACGTTAACCTCTCTGAAGTTGTTTTATAACAGAG  
TTTGAAGAGAACTGAGTTCTCTGGACTTCCTTTAGAATTATATTGATCCA  
CTCACTGGCATAGTATTGACTGGAGTGGACATGCAAGGATTGGAAAGTTT  
CCTGGACCAGAGGAACAAAGTCTGCACTTCGTTCCACAAGCATGTCAGCTC  
AAGATGAGATTACATGACAAAAATACACAGTGGCCACACCTCAGCCCTCC  
CGGAGAAAGGCCCTGTAAAGACACCAATGAGAGGAAACAGTGGTAGAACTT  
CAGGCAATGAACCTGGCCATCCACTTCATGAGAGAGAAAAAAAAGTCA  
CCTAACACATAGCTGGTGGTTAACCATAACTGGTTAATCATGAGTTTGGA  
AAGAGAAGTAGTAAATAATTAATGCACTGGATTCCCTCTAAATTCATGTC  
CACCCATACCCACAAGATGTGACTTTATTTGGAAATAGGGTCTTTGTAGA  
TATAATTAGCTAACATGAGGTATCCTGGATGAGGGTAGGTCCTTTTCTA  
ATGATGAAGAGTCCTTATAAGAAGAGGAGAGGACACATGGATACACAGAA  
GGAATAAGTCTCTGAGATGACACAGAGACACAGAGGGAAGAAGCCACAAC  
ACAACAGTGTGAGAGATTGGGATGATGCATCTACAGGCCAAGGAAACCAA  
CCCTTGACAGCAGCCACCAGGAGCCAGGAGAAAGGTCTGGAACAGTTCCT  
CCCACACAGCCTTCCAAAGAAGCCAAGTCTGCCAACACCTCGATTTTAGA  
CCTCTGGCCTCTGGAACCTGTGTGAGAATAAATTTCTCTAGTTTTTAAGACC  
TCCAGTTGGTGGTGATTTGTTACAGTGGCCCTGAGAACTAATACGCCTG  
GGGACAAGAAAATCTGGGGAAAAGGCAAATGGAAAGACCAACGGGAGAGA  
GCAAAAAGTTTTAAGTGTTTTTTGTATTTTCATGTTAACACCCGCGAGAGAGC  
ATCTGCTATACAGGAGGCCTTAAACATCCAGGTACATGGTGATTTCGATGC  
CCGCCAGGTGCCCTGACAGTCCACTCCCGCAGCATCTCCGTAAGTGCCTC  
CCTCCCTTTATTACATTAATATTTTTATTATTCTCAAATTAGAGAACATC  
AGTGTCCACCCAAAGGAGACGGTATTAAAATTGCAAGTGGGAAACAACT  
TGAGAATTTAATGTGAAATAGAAAACCCAAAGCCTTTACTTAAGAAGTGA  
AATATGTAGTGTATATACATGCACAAACATGTGCACAAACGCACATAGTT  
ACACATACACACGCCTAAATATAATCTAGAGAATGAGGCAACACTGTGCA  
GATATGAAATGTTGGTTATTTTTGCTTTGGGTTTGGCTGCACAAGGGTGTG  
TTAAAAAACAAAATTCAAATATATTTAGTATCTATCATTCATGAAACCAG  
CCAAAGGATTGGAAGGCTCATGGCTGGAGCCCGGTTGTATCGTCTTTGTT

TGGTCTGCATTTCAAGTTAAAATTAGCTCCCTTTTCCTTCCCATATATAA  
GCATGCTGTTATTGCCTACGAACATAGCATGACAGTTTCATAAGTAGAAA  
TAAATTGTTAGATAGATACTTAGATAGATAAATAAATTTAAAAAGCCATA  
TTGAAGAATAAGAAAAAACATACATATATAAATAATATCTAAAGGAATC  
ACCATGGCTACATAAATTCCTATACGATTATGATTAAGCGAGGTAGATTT  
TCGAAGCCTGATAGATGTAGAACAATTAAGAAGATATTATGGGAGGAACA  
TAATGACTGAGTAAGTTTAATATATTCCAGTAGGGAAAAATACAACATCTG  
TAAAGCCATGCATACCCCCATGGAACCTTTGTCCCAAAGCAGTGTACAGT  
TAGAAGGACTCAGTCTAAGCAACCAAAAGTAATTTCAAATATATAAATT  
TTTCATGACAATCCCCTAAATCACCCATAATTAGGACCATAACATGATTTT  
GAGTTTTAAGCCCTCCATTGTGATATGTATTTTTTGAATGCACGATTCAT  
ACAGTGGCATAGGCATATACTATAAATAAGGCAATGAAAATTTAATTTTG  
CATTATTTTTAAATTATATGACAGAGGGGAAATAATTCCATGCATGTATAG  
CTTAACTCCTTTCAAATTTAATAAGTGCATTCTTTGAAGCCAGCACAAAT  
CACATCCCTCACTTCTGTTTTTTAAGCTGAAGAAATGGGCATATCCTCAG  
GAGAACTGAGGATGCATCAAATGTATCCCTGCTTCAATAGCCTGATTCCC  
TTCCACACTATGGCTGTGACCCCACTTTTCTCTCTTCCACTTCACTAAAA  
TAAAAATTTCTAATCTTTACACATGAGGTACTTTGCTATTTCCATCCTCTC  
GTTTCCTTCCCTGGCTCTCTCCCACCTAATTCCAAAAACTTCTCAAATGA  
AACAGCAATCTAGACAGTTCTCTGTCTATCAGAAGGGGAAAGAAAAATCTA  
GGAATTGTCAAAGGTGAAAAACATTTTATCCTGTAATACTAACAGTGACAA  
TGAAACATGAAGAATCAAGTAGGAAGGCACTGAGTCCACCTTATGGGTTT  
ACTATGTATACTTACTATTTTAAACCACACAAATTGCCATATCAGTTCAT  
CGAAAAATAACCAAATATTGGCTCTTTTCATATGATTTGGCCCAATATAAT  
AAGGTACATAAAGAAATCAACTCTTCACATCCTTGGTGGGTAAATAAGCA  
TCAAATAATCCAGTCACCTGTCTTACCTCTATTACTCTACAATTCTCTGT  
TGTTGCAAGTGCCGACATGTGGGCTTTTCCAGAAATGTTGAGGTCATTTA  
TCTCCATTATTAAGTGATGTCTTATCACCCAAGTGTTCTAGTGACTCTCT  
ACTTAAGGCAGAGACCTCTCTTTTGGCTGATCTTATCCAGATATCCTTTC  
AGAACATCTTTTTGTAAATTGAAGTTTTAGTTTTAGATGTACAACATAGT  
GATTGCGAAATTATATACATTATGTACTGCTCACCGTGATAGGTTGTACA  
GTTGCCATCCGTCACCATAACAAGTTATTACCATATTATTGATTATATTC  
CTTATGCTGTACTTTTTCATTCCTATGACTTATTGATTTTGTAAATGGGAAG  
TATGTACCTCTTAATCTCCGTCACCAATAGGTGACGCCTATCCCCTTACC  
CCCTCCCTCCCATCTGGCAACCACCAGTTTGCTCTCTTTATTAATGAGTC  
TGTTTCTGGTTTTGTTTGTGTTTTGTTTTGTTTTAGATTCCATGTATAAGTG  
GAGTCATGTGGTATTTGTTTCTGCCTACTTATTTCACTTAGCATTATACC  
CTCTAGACCCACCCATGTTGTTGCAAGATTTCAATTTATATATATAATATA  
TTATATTATTATATAGTATATTTATTATATATTATATATTATATAATAGC  
ATATTATATATTATATTAATAATATTTTCATTCATATATATATATATATTT  
GTGGGGGCGCCTGGGTGGCTCAGTGGTTGAGCATCTGCCTTCAACTTATC  
CTGGGGTCCTAGGATCAAGTCCCACATCAGGCTCTCTATGGGGAGCCTGC  
TTTTTCCTCTGCCTATGTCTCTGCCTCTCTCTGTGTGTCTTCTGAATA  
AAAAAATCTTTTTTTAAAACTTATATATTTATATATGTAAGTATATATC  
TGGAACACATATATATGTGTATATACAATAGCTATAAAAAATATATATAC  
CACATCTTTATCCATCCATCTACCCATGGACACTTAGGTCGCTTCCGTAT  
CTTGGCTATTACAAAAAATGTTGCAATAAACATAAGGGTGATATATCTT  
TTCGAATTAGCGTTTTTGTGTTTTCTTCAGGTATAAAACCCAGAGGTGGAAT  
TACTGGGTCATATGGTATTTCTATTTTTTAACCTTTTGGAGAACCTCCATA  
CTGTTTCCTTTTCAAGACATCTTGGTTGTTCCGTAAATCCACACAGGCCCC  
CAGTCAACACCCAAACAGACCTCCTCACTCTAAACCATAGCCTTCTTCTA  
ACATTTTATACTACACACTCTGGAATCTTTATTTGTATTATTTTCCGTAA  
GCCCTTCATCATTTTTTAGAAACAAAACTGTGCATGCTCTGCTATCTAAG  
TCAAAGAGTTGCTCATTTTCCATTTGTGTTTTTATTTAATTTAGTCCAGAA  
CCAAATATTATGATAATATTTTAAATGCCAATGAATGATGTCAATGCCGAG  
GCTGAAAAATGAAACCAAGTGATGTCACTTTTATCAGTTGGAATAAA  
ACAGGTTGATTGTGGTTTGCAGATTAATAATTGGTTAATCATAACACATGT  
AGTCTTTGGAATGTGTGTAAAACCCATTTTACACAGTGCCTAATAATTCT

AGAGAGATTATTCCAAAGGGGGAAAAATTACCTTCATCACTGGGCTTCCA  
AAAAAATAAGCAGAAGTGGAATTAACGTAATTGCTTAATTAACAACATTCA  
CCAAAAGCCTCCAAGTGTATAGAATTAATCATCTTATTGTAAGATTCAATT  
AGAAAGTAATGGGCATAGTGAGAACATTGCACATCTGGGAATAATTTTGT  
TCCATTAAAAATAAAAAATAAATACACCTTAGAAAACACTATTTTGACAAT  
AATTCGCTCCCTGCTTTGTCTTAAAAACAAAGGTTCTGTTCACTCACAC  
AGTCTATAAATAACACACCATAATCGTATTTCCAAGAATCTGAAGTATGT  
GAATGACAAGAGTCACAAGATGATCCATTTTGGTAGCATCCTTTTCCCCC  
AAAGAACCTCTGAGCCTTGATAAATGGTCAGTAAAAGTGCGAAAATCTAT  
ATTATTCTTTGTTCCATGAGGATTATATTTTCAATATACTAGTTTATAGT  
CATCAGAACCTAAGCTCTAGTTAGCAGTTTATAAATTGGAGGTTTAAAAA  
CTGATGTATAGAACTTATTTTCCAAATATAATTAATAAGTTAAAAATAAA  
ATACCTTTTCAGTTGTAGGGGAGAAGGAAGAAAGGAAATTAGCATTATCAGA  
AGGGGGTTCAGTTGTTCTATCCTTTGACATTTAAGTGATCATTATTAAACT  
ACCATTAACCTCTAGCTTCCTGAAGACAATCAAGTATGAAATCACTCCTTG  
TAAAAATGTCTTCTGCCATTTTCAAAGATTCATTATTGTTTTGGGATACAC  
TGGGTAGTTGTGATTCAACTTCAAATTGAGAAAAACATTTGATTGTTCCA  
ACAAATTACCTAGAGGAAATGCTTCTGTTTTATTCTCTTTTTGCCTCACA  
TGTGCAGGGTCAATGGTCACTGGGTATGAGGGTCATTGGGTATTGCTCAT  
GGTTAGGTCTGATCCCCTTGAAGACTATAGTTTTAACTAATGTAAACGCC  
AATGATAACTTCCAACTAGATCTTTAGACCCTAGTTTTTTACTGACTTT  
GGTTATCCATATATGTACAATGTTAGAGGTAATAATAGTAAAAACACCAA  
TAGCTACTAAGTTTAATAAATATTTAGGTACCAGCTGCTGAATTAGCTTA  
ACTAAGAACACTTTGCCTTTACTTCTATTTTCTCCTGGATAAAACCTTT  
AAAAATCTCCTTTTTTCTCCATAATAATTCATCTCATACCCTCACTTTTA  
CGTACCCCATTTGGCAAGACGAAAGCTTGGAAGGTAGCCAAGGACCATCT  
TTTGTTCCTTAAACATTTCCCTTGTGCATTTATTCCACCCCTGCCAAGTG  
GTTTATCAAATATTCTTGTAAACATAAAAGAGTAAAAAAAATCTCCTGC  
TGAAGAAATAACATTTTTCCATATTGTTACATTATTAATGAGTCTAGAAA  
GTTCAATTGAATTGTATGGCAGCAGTCTCCAGTTCTAATTAGAATCACCT  
GAGAACTTTAAAAACACATTTTCTGGGACCCACCCAGACCTACTACTC  
TGAATCTCCCAGGGCAGACCAGAACTCTGGATAGATTTTATCAGTCTCA  
GGTGATTCTGGGGAGGAGCCAAGTTTGGAACCACCGATCTATGGAAATA  
GTTTTTGTATATACCCATAGCCTCCCATTTACCGATATTTGACCAAATA  
TTTTGGCAAGAGACCAGAATTTGGTCACACAGAAAAGATATTGATGAACT  
GTTTCTTCATCTTTCACTTCCAATAATTTCTTTATATCCCATAAAATGAC  
AGAGACAAGACTTAAGATAAAACAAGCATTTTTCAGCCTGCTTCTTACCC  
TGGAGAGATACTTAAGGAAATACTTATCTAGGGTTTCTCCTCCAAACCC  
ATGCTGTCTACTTGCTAGGGTGTGTTAAGTATTACAGAAAGCCTGTGCTG  
ATTCTCAAGCTACTGATAAGAAAGCCATTTTATTTTTAAAGCTATGGAGT  
AACAAAATGAACAGTTGTCCAATATCAGTGTCAATTTTTGATTCTTGGA  
ACATGGCTAACAGTACAAAACCTTTGACAAATCTCTCTGAGGTTTATTACA  
GAATTTACATCGTTTGTGTGAATCCTAATTCATACAAATTTGGGGAGACA  
ATTTACTCAATCCACAATTA AAAAGCAAAAACCTGTACAATTCTGTCAAGA  
TAATAACCAACATCATGGTCAATCATATAGTATCATTGAATGACCTTCTT  
TTGATACTGAGTATTTGAAAACAAATACTGCGCCCAGAAATACAACTGT  
GTGCTTGCCAGAGGCAGAGAATGAATATGACAGCATAAATTTCTATAATTT  
ATGCACAAAATGTGTGTGAAGTTTTGGTGAAATTGAAATCAGATTGAAA  
TTTTTAGGAGATATTTGTTAAATTGATGCTTTCTTATGTTTCAAGTGA  
GAAATTTGTGAGGATTTCTTTTCCACTATTTTCTTTTTTAGTATATGCA  
AATTCAAGTTCAATTTGAGTATGTGGAGACTTTGCATCCTTCAAGTTACT  
ACCTTTATAACAAGCAAGATATTAATAATTCCGTATTATTAACATGTTTT  
CATTATGACCTAATTGTTAGCTATACTTACATGTTTCCAGCACTTTGTGG  
CTTATAAAATGTTTTACATATATCTCATTTCTTTGATTGCAACGTGTAC  
CTTCTATTTACATTTTAATACTTCTCAAATAATTGGATGAATCTTAAAAA  
GCAATATGCTTACTTAACATGCTAAATGTGTTCTTTTCGTCAAAGCTTTC  
TACGAGCCTTATTATAATCCATGGCACGTTACAATCAAGGAAATATGGTA  
TTATTGTAGCTGATTCTAAAGACAATACTGTAAAGTTGACAGGATTTCTA

TTTTCTCATTTAAGCAACAAGGAAATTATGCCGTAATTAAAACATAAGT  
CTTTGGATTCCAGTATGCCTCCCAATGGATTGTACACTGCTAAAGTTATC  
ATATGTCAAAATGTACATTTATTTTAACATGAAAAAGTATTTAGTTTGAA  
AACAAACACGAGCACAAAAGAAGAATATGGTGGTGTGTGGTATGGTTTTG  
TCTAACAAGGGCTTCCAAAAGGAAATATAATATGTTTAGTTTCAAGTATC  
CCTTATACAAGGAGAGTCACTGTGGTAAGCATCTCTGTGAGGCGTGGGGCT  
CAGGCAAAGCAAACCTCCATCCTTTCAATTTCTTTGTTTGCTGAAGAATGC  
TACCTACCTAATACCCCATGATAATCTTTGGCCCGTGAAACACGCCAAGC  
TCTGCCTGTTTCTCTCAACTTGGTGGTGACAGCTTCCAGCTGGACACCTG  
ATCAATCATACCTGTCAATTGGTCTCCATGTCTAGGGCGTGATTGCTTTTG  
TTTGTTTGTTTTCTTAGCTTGCTCTGCTGCTTTACTGGCAGGCTTCCTCG  
GTTGTCCATTTAAAGCCAAATGTGAAAGTAGCAAACCTCCACCATCTGGGG  
AAAAGGGAAAGGGTCTGGCACATCTCACTGGCCTTGATTGTATCAAAACT  
CCTGGAGGCAGCAGATATTTTCCTCAGTGCAGACATGTTTTGGCTGCAGT  
TGGTCTGAAGAAAGAGGAGAGGTGGGTTTGGGTGGTGTTTTGGTTTTCA  
TTCTCCGTTTTCTTTCTTTCTTTCTTTCTTTCTTTCTTTCTTTCTTTCTC  
TCCTCTCCTCTCCTCTCCTCTCCTCCCTTCCCTCTTTCTTTCTTTCTTT  
TTTTCTTTCTTTCTTTCTTTCTTTCTTTCTTTCTTTCTTTCTTTCTTTCT  
TTTCTTTCTTCTCTCTTTCTCTTTCTTTCTTTCTTTCTTTCTTTCTTTCT  
TTTCTTTCTTCTCTCTTTCTCTTTCTTTCTTTCTTTCTTTCTTTCTTTCT  
TTTCTTTCTTCTCTCTTTCTCTTTCTTTCTTTCTTTCTTTCTTTCTTTCT  
CTTTATATGTTGAACATGGATTGGATAATAGGATAGAATGTAGGATGTCT  
TTGAAGATTCCCTCCTGCAATGAAATTTTTATCTACTTTGACCATTCAAAA  
GAGTACTTCAATCTCCACAGACACGTGACTGTAAATATGGCTTTTCCAAA  
ATATAAGGGCCTTCTTTGGCTCCTGGAAGGAAAGTATTAAAGTTTATATT  
TATTTATTCAATGATCTATGGAAGAAGTGACATAAAACACTTCTCTATTA  
ACCTTTCTTTTTTTTTTTAAAGCCCCAACTGTGAAGCTTAGCAGCAAGC  
AGGATCTATGAGAGCTTATCAGTATGTACTCAGGGTGAAAAATGGCATAA  
ACACACAGCAACCCTCCCTGGAACCTAGAATTTTACATCTTTAGAACCTC  
TCTAGCAAAGCATTCTGAGGAAATCATTCACAGGTACACCTCTTCTTCGG  
TGTGTTTCTTTTTCTATTCTCACTGTGTAGGTGTCAAAACATGTTACCAA  
CTAAGGAATATGTTTCATTTCTCCCAGGCTACTACAGCATTCTGTAGGAT  
TTGACTTCTGCAGAAACAAGGAAGAAAGATGTCTGTCTGTGCAGTGCCCC  
TTAGGTTTTGAGGACTAAAAAGCACCTGCCATGCGAGTGGAACAAGGA  
AATTAGGAAACAGCAGCTTCAAGTTGCGCAAGTTTATAAATGCCACCT  
TCACTGACTTACAAAGGGATCACGTGCCAATAAGCCCAACAAAGCTGAAA  
ATACTGTGAGTCCAAAATGCGCTTAATATGCGTAACCTACTCAACATCAG  
AGACTTGTCTACCTTAAACATGCTCTGAATACTTACATTAGCCTACAGAT  
GGACAAAGTCATCTAACACAAAACCTATTTTATAACAAAATGTTGAGGAT  
CTCATGTAATTGATTGAGCGCTGGACTGCGAGTGACAAACAGAATGGTTG  
TCCGTGCACTGGCTGTATACCCTCGTAATTACTGGGTTGACTGGGTGTGG  
CTGGTGATGCCAGCATCAGGGGACAGGATTATAGTGCAATTTCACTATCC  
CAGAAACAGATCCAGGTCCATGAGCAGGGGCCATGCTAATCTTCTCTGTA  
TGGGTCCAATTTTAGTGTATGTGCTGCCAAGCAAGCACCAGAAACAGAT  
CCAAATTTCCAAATTCAAAGTACGGTTTCTACTGAATCTGTATCATTTTTG  
CATCATGGTAAAAGTGAATTATCATAAGTCTGGGACTTTCTGTAGTCACA  
AAGCAGATAGCTACAGCAAGGACTCAGCTCCTACAGGACCACGCGGAAGG  
AAAAATATGCCCATATCCACCTAAATACAATCCAAACATAGTGTCTTAAG  
TTTGGGAAGGACATGTATGAATACACAAGATCTCTATATTCAGAGAGAC  
AAACATAACATCCTAGAGAAAAAAAATCTTGGTATCATTTCTAGCAAG  
AACTCCAACAGCTGTGGTGTGAGTGGGACAGAGCTGAAAGATGAAGCCA  
GCCAGACTATCCTTTCTGCCACAAATGAAAACAAAGGAAAAATAAAGAG  
CAAAAGAAAATTTATTTCATAAGCATATGCTCAATTCCCATCAGATCGAGG  
GCAGCCTTTTGGAAAAAAAAGCACCCACCTAAAGAAGCTACTAGATAA  
TTCTTACACTCCTCCTCCTCAATCACCCTACCATTTTAAATATTTGCTT  
CTTTTTCAGACTTGCTCATCTGGAACCTAAGTTAATTCAATGTAGCTGT  
TATTGTTTATATCACTGGGTACAGCATCCTGGGGGGCGGGGGGCAGGTGC  
ATGGGTGATGAATTACCAAGATGATTAAATTGTTTCATTTCTTTGACAAAG  
GAAAGTTTCCAGCATGTTTTGTCTGGAGTACCTCGCAGCTATACAGGATG

ATGTGCTATGATGCAACAAAAAATAGACATTGCTGTTATCATCTGTGATT  
AAAGTTTTCATTACATAAGTGCATAGAATACATTTTCACCATTCCCTGTAA  
GAAATTGTTTTCTTACTTTTCAGAGGATTCCCTATAACCACCAGTATTTCTAT  
CCAACAGGAGCCGGAATGAAATTTAAAAAACAGCAAGAGAGAAAGACTC  
AAAGTTTTGCATTGTGATGATTAAATTATAAATGCATAGAATTCTTTTTT  
TTTCCTTTTCAAGTCATTGTTATATTATTACAGGCATCTGCAAAATGGGT  
ATAACATTACATGGGTTAGTTACAAATATACTATGAATATGAAGTACATA  
AAATTAAAGGATTGAACACCTTCATAAAGACCATGTGATTTATCCCTAAT  
ATCAGTTTGGAGGAAATTGGAAGTAGATAAGTAGCCTACACAGAAAGAGT  
CAAAGATCTTATTTTCTTAATGTAAAATGTAGATCCAAATCAATGGATGG  
CAATAAGAATCTTAATAATTTTAAGATAGTAACATAATCAGAAACTGTGG  
AATGGCAGGAAGTGTGGTTGATGGAAGCTCAAATCGATAGAGGTTTGGGC  
AGAGCACTGATTTTTTTTTTTTAGGAACAAAGTTGTGATGACCCATACAAG  
AGTTTTGCCTTGTGGCAGTGATAATATAATGGGATATATCTTCCAAAAAT  
AGCTAATACTTATGCTAAAGAAAACACATTATTACTGAAATTCCTTCCAG  
ATTCTTAGGGAAAGCATATATGAGTTTGTGGTCTCTTATAAAGCTTACTG  
CGAACACATTTTGATTTTGTGTTTTGTTTTGAACATGATTTTATTCTCCAAG  
TTCTCAGCCAGCCAAATCTGTGCTTTATCTTCTCGCTTTGGTATGATGCC  
TGAACAAGGCCTTTCAAAACAGCTTCCTGTCTGGCTTGTTTAAACATAC  
CTCTTCACTGTCTCTGGGCTGAGCTTAAGGGAGGATATGAAGTCAACAAG  
TATAAGGTGAAAATAAATAACCATCCAGTTCAAACAAACCACTTGCCTCA  
GTCAATAGTTTCTGGCCCCAGTTCAGTTGTACCCAACAAAGTTCCTTAGA  
TATCTCATTATCATGCTTCTTTAAGGTTAACTCTTCAAAGATTATCTTGT  
TTTGAAGTTCTAAACATCACAAATGCTAAAATGACTCAGGTATTATCATG  
TATTGATGATTATGATGTCTTCTGGAAAATGAAAACCTCAGGCGTCTAA  
TCAATAAAATAATTTTGAGTCTTTGAACTGGTTCAGGTCAATTTTCTT  
GGCAGTTTTTGGCTTCCTGAATTATACTGACCCAAACCATGAATAATGA  
TCTAAAATTGCACAATATACAGAAACCATCTGTTTCGATAGGAACAAGAGG  
ATGATGTCATGGGGCCATTTCTAATCTCGATTTAATGTCTGCCAGTGCT  
GATGTCACTGGCTTGGCAACCCATTGGCAGACTCCAATTTGTTAAGGATG  
AGTAGGTTCAAGAAGGAAATGTATCACTGAGCAGAGAAGGACTTCTCAT  
TTTTTCTGGATTGGAGGTGGACTAACGAGAAACAGCAAGGGTTGAGAGT  
AGAACAACCTGGTATATACTCCACTGACTAAGAGAAGTACTACAGTTCAC  
AAACATGTCCCTGTCTCATTTGCATTTGTCTTCTGAAAACCAAGATGTTG  
CAGAAGTTTTCTCAGAAGTCAAACATAGTTGCACCAAAAATAAAATGGTAA  
GGAGTAGTCTTTGCTCAGCTGTCCAGAGGAAAATCTGGAAGTCAAACCTGA  
ATGGGACTGTATGACAGATGAACGATCTATGAACTCTAAGGTTTGATTTT  
TACCTAAGTGTTGAATTCAGGAACCATAACAATCATCCATCTACACTCAA  
CCCTGAGAGATTTATCCTTTTTTGGGGTCCACACAACAACAGAAGTGAC  
AAATAAGTGATATTAAGAAGTTTGAGAGAATTCAAAGGAGTACAACAAAA  
ATGATTAAAGGGTTAGATTATCACTTCTGGGTAAATGTTAAAAAATTT  
GGGACACTGTTGAAGAGAGGAGCAGTAAAGGAACATGAGGAGCTCAGACA  
TATGGGATTTCCTTGCTGAAGAACTATTGCCTACATACCAAAACAATAGC  
AACAACAACAACAACAACAACAATAATGCTGCAGCTTTAAGGATTTAG  
CAGAGAAAAGAAATAATGTTTTTTCAAGGTAGCATTTTGTCCGAATTAC  
TGGTGATATAAAAATTGAATTGATTATCCACTTAAACCTGTGTCAGAAGGG  
CACGCGAGTGACTCAGTCCATTAAGCATCTGACTCTTGATCTCAGCTCAG  
GTCTCGACCTCAGGAATGAGTCCAAGCCCGATGTTGGGCTCCATGCTGCA  
TGTGGAGCCTACTTAAAAACAAAAACAAAAACAGTGTCAGAGTTCTCAA  
TTGTTAAATCAAATTATTTTCACTGAATGAAGGTCAGCTTATATAAGATTT  
AGTGACTTCTTAATGAATTTTGAAGTACATTTAATTAACAGACTAGATA  
CATTAAGTGTATATTTTGTATCTGATTAAATAATGTAGGGGAACTTGT  
AAAAGCTGATGCCAACTGTCACTGGTCTAAAATATTATAATGACACAGTA  
GACAATTGTGAGTTTTTLAGGTACACCTCAGAAGTGTACAAAAGAGTTACT  
AATTTACAATGAGACATATACATTGCATGTGAACATTGTATATGTATAGA  
GATGAAGCTCTATAAATTATCATATAAAGGCTTTCCATTTTAATTTTTTC  
CTTAATTTTTTAATGCAAAAGTTTACACCTGTACAAGGACACAAATCCC  
ATTTAATATTATTTTAAGATGATAGAGTTTTCCATAAGTTTCTATAAAGA

GAAAGTTTGCAGGTCCGAGGAAACAAACAGATTCTGTTTCCGTCTTTAAA  
ACTTTTTTGAACAGTTAGATTTTATGGAAATAAACTTATGGAAATTTT  
AATTATGGAAATTTTTTCCCAGTAAATCATGTTTCATATGAACTTTGGAGA  
ATAAAAATTGAAGGGTTTTAAATGTTTTATTATGAAAACGTAAAACACAA  
AAACATATATGGAGTATGTACTTTATGCGATTAAGGAGAATTGCTAAACA  
ATTGTAAATTAATACCAAGACCCAGAGGGGATAGTCAAGGAAAGAAAGTT  
TTCTTGATTGCAGCCTAGTTAAGCAATTTAATTAGAAGGGCTGCTTTACA  
AATATGTGCAATTTTGCCAATGGGAAATGAGTTTTCTGGTGATAGGTAGA  
AACACTGATGAGTCCCAGCCAGGATATCATTACAAAGACAAAAGGTCACT  
GGGCCCTCCTGACAACAAGCACATGTTTTCCATTGGATGCCTCCCCTATG  
GTGAATTTTCTTGCCACTCATTAGAATTTATTGACACATAATTCCCCTGC  
AAAAGAGATTGTGGAAAATGTAGTCTTACATAATCTTTCTCTTCTATTTT  
TCTCTGAAGAACTGAGTGAAAGGTGTATCACAGTGGCCGTTTAGGTGGTG  
ATGATGAAGCTGAGAGGGAGGAGAGAAGGTGAGGGATGCATGCAAAATGT  
CCATTTGCCATTTTGAAGCATACGCAGACCTTTAAATGGTTCACTTATCT  
CATATTGTAAACTCCAACCTTGAGGAGAAATATTCACCAGACAGGTCATAA  
ATCATGCCCCAAAGACAGGTGCAATAAATACCAATGTCAAAAAGTTACAAA  
GTAAAATTATATTGTTTTGACAAGGCTTCCAGATGCGCTGACAACAGGGC  
AAGTAAATGGTCTCCTTTCTGAGAGCCACATTGCTGGTACTTGGGTGGG  
GAGAAGGATCGCAAGCCATCATGAGAAGAACAGCATCCCAGAGTGTTAAC  
GCTTGTCCTTCTTACTATACTCAAGGAAACAGCGAGCAAAGATGCCTCTG  
TCTATGCAAGGACGTCAATTACGTTACAATCCCATCGGTGAAAAAAGCTTT  
TAGGGCAGAGTCACATAACCATAAGGAAGACATTGAACATGCACCTAGTTC  
CCACCCCTTTTTGGAAAAATTTGCTTCTAAATCACATTGCGGTGAATTGTA  
TATAAGGATATGCACACACATATGTATATATACTTTTTTAAATTATTTTT  
TTTATCTGAATATAGTTGACACACAATGTTACTTTAGTTTCAGGTGTACA  
ACCTAGTGATTCAACTTTTCTGTGCTGTATGCCGTGCTCACAAGTGTAGC  
CACCACCTGTACCATAACAACGCCATTACCATATCATTGAGTATGTTCTT  
TATGCTGGGCCTTTTATTCCCATGGCTTATTCATCCCATAACTGAGAGCC  
TGTATCTCCCCTCCCCTTACCTATTTTGCCCATCCCCCGCATCATCC  
TCTCTGGCGACCTTGAGTTTGTCTCTGTATTTATAGATCATTTTGTGTTG  
TTTATTCATTTGTTCTGTTTTGTTTTGGGTGCCATATATCAGTGAAAAACA  
TATGGTATTTGTTTTTCTAGTCTGACTTATTTCAATTAGGACAATGCACT  
CTAGGTTTCATCCATGCTGTTGCAAATGACCCAGTCTCATCATTTTAAAGG  
CTGTGTTATATTCTGTTGTTATATATACTTAAATAAATACACATAAACAT  
ACATTAAACATTAACTGTTTATTTTTTTTATTGATTTATGATAGTCACACA  
GAGAGAGAGAGAGAGGCAGAGACATAGGCAGAGGGAGAAGCAGGCTCCAT  
GCACCAGGAGCCCGACGTGGGATTCGATCCTGGGTCTCCAGGATTGCGCC  
CTGGGCCAAAGGCAGGCGCCAAACCGCTGCGTCACCCAGGGATCCCTAAA  
CATTAACGTTTTAATGAAACTACCCAGATAACTTTTTATAAAAAACTTAT  
TTATTTGAGAGAGAGAGTGTGTGTGTGTGTGTGTGTGTGGTGTGTGTGTG  
AGACAGGGAGAGAGAAGAGGGGTGTAGAGGAAAAGGTAGAAGGAAAGAAT  
CTCAAGCAGACTCCCATAAGTGTGTAGCCAGTCTGGGGTTCCATTTCA  
TGATCTTGAGATCATGACCTCAGAGGAAATCAAGAGTTGGACGCCTGGGA  
CGCTTGGGTGGCTCAGAGGTTGGGAGTCTGCCTTGGGCTCAGGGCCTGAT  
CCTGGCATCCCGGGATCAAGTCCCACATCCGGCTCCCTGCAGGGAGCCTG  
CTTCTCCCTCTGCCTATGTCTCTGCCTCTCTCTCTTCTCTCTCTCTCTG  
TCTTTCATGAATAAATAAATAAAATCTTAAAAAAAATTTGGACGCTGAGC  
AGACTAAGCCACTCAGTAGCTCCTTCTGTAAATGAATCATTTATATAAGA  
GATCTTTTTGTAAATGAATTACTAAGTATTTGTTTTATCATTTGTATAAAT  
CCGGATTTTAAACATACTTAAGTGAAAATACTTTTATATGAACTGTATTCT  
TTCTTATACAAAACAGCTTCATTAAATTTAAGTAAATTTCATGTCTTTG  
TTCTCTTAATAGAGGTATTAGCAGTAACAGAAACATTAAATGACAAACA  
TCATATAGTTTTATTTATTAGCACACACTAACACAACAGGATGCCAAAAA  
TCTCTCCAATTTTGCTGTATGTTTCTGTCTTAGTCGTAGTCGCATGAAAA  
TACCAATGTTATTTGTTGAGCAATTAACCTTAAATTTTCTGTGTGCTTAT  
ACTACAGATATATCCAGCTTCTGGTAATGTATTAAGGGCTATAAGTAATT  
ACCTGAACAGTTAACTTCCCTTAAATATCTTAATTGGAAGTAAACAAATA

GGATATATATTTTTTCAAAATTTGAGGGATAGAAATAAGGGTTTAAATTAT  
ATGCCCTCTGGAGGCACTTGGGTGGCTCCAACCTCTTGGTTTCAGCTCAG  
GTCAGGATCTCTGGGTCTAGGAAGGAGCTCTCCTACTGGACTTCACACT  
CAGCAGGGAGTCTCCTTATGGGGTTTTCTCTCTCCCTCTCCCTCTGCCTC  
TCTCCTAGCCTGCTCTCTCTCACTCTCGAAGGTCAATCTTTTTAAAAAA  
TAAATAAATACATACACACACAAAAATAAATTATATTCCCTCTGCATAGC  
AATGTTGAGTTTGTACCTGAATAATTCAATTGTACAGTTCGGTTTTAATA  
ATAATCTCTATTTGTCCGAATGGATCCTACTATTTAGATATTTACTGTAA  
ATGGAGGGGTGCAGAATTCAATAATTGGCCAAATGCATAATAAGTAAAAG  
AGTTCCAAATCTGTATTAGATATGAAGAAAATGAAAGATAAGCACAGCAT  
CAACTTAAAAACATTTTACTTGGATACATTTAGATTGACATGAGATCTAA  
CTCCCATCTTCTCTTCTGGTTGCCTGCTTAGAATAATACCAGACTGAGAT  
TGGAGGTTTTCAAAACACTGTCTAAACTTCCAACCCGTGGCCTGTTGAGGA  
AGTGAACCTCAAGAGTTTTTTTATATAATCCCTCTAAAAAGGGCTCCACATT  
GGTAATTCAGCTACACATCCCTAGGTTAAAATGTTATTTTTCTCTCTCTC  
TTTGGGGGAAGAAACAAATCACAAAAGTGTGCTTAATTAATATGCTTGA  
CATTCCAACATGTGATATCAGTTACATTATTTTGCATTTATTCCTTGGGA  
GTCAGGTGAGTTACGTACTTCTCACGAAGAAATGAATTCTTTTGCTGAGT  
TGCATGTGGTGAGCTAGACTTATGACCTAGGGATGCAGAAGTCAGGGGTA  
GAAGGCCTGGTAGCAACATTCTATAAACCTAGCCAATGTGTTGCCCTGGA  
AAGGAATGTGCTACCATAAAATGAAGGCACTTGGAGGGCAAGGGTCATGGT  
ATGTAATTAGCACAGGCTATTTAAGGAAGAATAAGAAAAAATGTTTTAC  
AAGCTGGTAGAAAGAGAAGCAAAATAATCATTTAAATGTTCCAATTGTGAG  
TTCCGACAGTGTGTGTGGTTTTATTTACAAGCAACTTTCTTACTAGTAAA  
AGGCAAAGCAATACTGAAAAATTAGGTATTCGCAGGTACCTTGCAGTGCA  
CATTACATGGCCCCCTCTTCGAGCTTATTTGCATAAGGTTAATCCCTAGA  
ACTCCATTTTTTCTCTTATTTCTAAAGCTTGTTCTGGCATTTGGTCAAATG  
ATAAGTGGAATAAAATAAAATTTGGAATCTTATTTAGACTATGACAGAG  
CCTTCGGCCCATTCTGTAAAGGAAAGGACAATGGATTCTGGTTTATAAAA  
GTGAGGGATTACAAAGGAAGCTGAAAAGCTTTTCTCTGGACAGCCCAGC  
CACCTAATGCTTGTGATCCATTAATGTCACCTCTTAGGAATATCCAGTTGG  
CCATTTATGTTGGCAAATTGAACACCAATAAAAAATAAATTTATAAAAA  
ATAAATAAAAAATAAAATAAATGAACCAAATTTTCAGCTGTACTTTTAGTA  
TAGCAACTGACTTAGTGTTTAGTATAGGGGGTGACTTCTGTTTGAGAAGA  
GGTAAGTTCAAGGTCATGTGAAATGAGTGTTACAGGCTTTAGTGCATGTT  
AATTACACTTACTGCTTTTCACATGGAAAAATAAAAAATTTTTAAAAGA  
AAAAATATTCAACTATTAAGTTATTCAAGTAGTAAATCTTCCCATCATCTA  
TGTAAACTGAAATTAATAATATGACAACTAAGTAAATAAAGGCACTTCTGT  
ACTTCTAACAGGTTGCTAAATACATGTGCTGGCATTTCCTTGGAAATCCT  
ATGCAGAGTAACACGTGGGTGGGTATCTTATTCTGAACTTGTCACTAGG  
CAATCCTTTTGTGTTATACTCAAGTTATACTACTGGTCAACCCACAGTTG  
TTTCTATTCCAGGTGCAAGTTAAATTTTATTGTGATTATATTATATAACT  
ATATAACTATTTATATTATATATAAACTTCTCTTCTCGACATCATTACCT  
GAGCAGTTGCGATCTTTGATCAAAAAAGTTGATAATGGAAGACTGTCTCA  
CTGGGAAGGATGCTATGAGTTTAAGATGGAATCTGGGGACTGGTTTCCA  
TTCTTTGTTTCCTATAGTGGGCAGTAAAAAAGAACAAATTAATGGAGTGA  
AACATGATCTCTTGCCTGCTAAATTCCAAGGAACATAATGTGATATTTAAT  
TACTTACAGATATTGACCTTTTTCCCACTGATTTTTTAGTTTATCTCCATT  
TTTTTTTCATTATGCAGTTTGTGTTTGTGTTATTTTCTTTTAAAGTTAGAA  
CTCACATGAAGATGCTATGCAACCAACAGGACTGAGGGCAGGATTCAGAA  
GAGTTACTTTATTAAGACATTGCTTTCACCAGCTTACAATATTGCTATCA  
TGGATACAAATAAATCACCAACATTTGACAGTGGATTGTGCTTAAATTG  
TGTCTAGTCTGATTAAATCCTTATTTGATTTTGTCTTCATTGAAATACTT  
AAGCATGTGCTAAGTGATATAATCTGGATGTTTTAATTTTAATTCCTAAA  
AACTGAAATCAAATAGATGATGTACCTATTTCACTTCCATGTTTTAAATG  
ACTTAATTTGAGCTGTACTGAATACCATATAAAAAATTTAATTGTGGCTT  
TACTGTATTTGTTCTTGTGTTAAATAATTCACAAGATCCCTCCCACTCTCTT  
GCTTTAACATCATGTGAGAAGAGGAATAAACTTGGGAACTGACTTCACA

ATCTGTAAGGACCACACAAATTGTCCATTAATTATTCTGTAAATACTTCA  
AATAGTAAGTCTGTTTTCCCAAGCAAGATTGTAAACTCCTTGAGGACAAG  
AATTATAGACTACTGAAATTCCTAGCAATATCTAGAGCCAGGACTGAATT  
TGTCACGGGTGTTTTATTAATACTTTGGGTTGAAGAATTGAAATTTACTCT  
CTTGGTAAAGGAAACCCCAAAAAAGAGCAAGAGACAAATTAGTTTAGAAT  
TTATTGCCACCTGCTTCTTTAGGCTCTATAAAACATATAGGGTCTTGACA  
AATTCATTAGGTTTTCTTTTTGTGTCTAGATAGTGCTTTAAATAGCATAG  
TTCCCATTTTAACAATTATTGTTTAATTATAAAAGCAATAGATATTCTTC  
AAAAAAGTTTTATTTTTTAAAATTTTTAAAGATTTTTATTTATTTATTCATG  
AATGACACAGAGAGAGAGGCAGAAGCACAGGCAGAGAGAGAAGCAGGCCC  
CATGCAGGGAGCCCCGACGTGGGACTTGATCCTGGGACTCCAGGATCATGC  
CCTGAGCTGCAGACAGATGCTCACCCACTGAGCCATCCAGGAGTACCCCC  
CCAAAAAATTTTTTAAATCAAAATATTTAATAAGGAAAAATGAAAATTGTCT  
GTGGATCCAACATCAGAGAGATAGGCCAATTATTTGTATACATTAGTGTC  
CATAATTTGTAGATTTTACAAATGGTGAATTACATTATATGTGTAGTTTT  
AGTATCTTACTTTTTTATATACAAGAATACATTTTTCTCATTAAATTAAAT  
AGTCTATAAAGTATTTCAAGTGGATTTATTTTCTATAATAAGTGAATATG  
GCCATTTCTTTGTTATCCTATTATTAATTTTTTTACCTTTAATTTTGTTA  
TTTCTATAAGGAGCAAAGTGCCATAAACACCAATGACAAATTGGTGTGC  
ATCTTTGACTATTTTATTTTGGTCAATTTCAAGGAGTAGAAAAGTTAATT  
CAAAAGGACAATCTTTATTAATTTTGGCTTATTACGCCAATTGTTTTAAA  
TGATATATATTTGGAAGACCTTTGTAAGTAAAAGATTGTCTTTTGTGAT  
CTTCTCTTCCTTTTTCTGGCCACATACCCACATGGCCTAGTCATTATCT  
TCTGCTATTTAATACCAAAGGAATTCCTGCTAGGGATCTGCCTTTTTTCAG  
TTAATCCTTGCTCTGTGCAGTCTTTTCCTTCTTCTTCTTCTTCTTTT  
TTTTTTTTTAAAGATATAATCATCTAGAACAGCAGGTCCCTACAGAGAAC  
TCTAACATTTGCTTTTAATCAAAAAGACAAAGTTTATATTAAACTCAGTAA  
ACAAAATCAGGGGACTTGTATAAATAACAATTTATGCATATCATTTTCAT  
TTTTGCTGACACTTTTGATTCTGGTATTGATGTTTTGCCAGGTTGTGAAA  
CTCAGAGGGCAAAGTGCAAGGTTCAAAGTGGCTCTTTGCCTCAAGGTTT  
ATTGAAAATAAAACATCGACGGAAGTCCGCTCAAGTAATTTGAGGAACT  
TTTTTTTTCTTCTAGGAAGGATGTCATTATTTGGTTTTTAGGGTTAAGTC  
TGCTTAGAGAGAAAAATAATAGAGTGAAAACAGGCTTGAAACATTAGAAA  
GCCAGCAGAGAACTCCTATAGAATTATGTGACTTAATGCAGGTATGTAAA  
ATTTTCAAGGAAAACATCTCATTCGATATTGAACGTCCCTTCATCTATTC  
ATCATCCAAATATTGAAGCTTTAGCTCCATGTCACCAATCCCAAAAGACA  
GTTGCCACATGGATGAATAAAGAAGAGAGCACTCAAAGTTATGCTATTTT  
AAATTTATTTTAATCATAAAATCGATTTTTGAAAATCAACACAACCAATG  
GATTGTCATTCTGCAGAAAAAGACAAAGTTAATTTTTCATTTCTGCCTTCC  
TAACTATTGTTTTGCCTTCACAGGAGCACTGGCTGAGAGTGTTTCCGTCC  
ACCCACAAGACAAGTGTGCCACAGGCGGAGCTGTTTTTAAAGATAACTGG  
AAACACCACAGAAATGTTCTCCAACCTTTGCCTTGAAATTGTCGTACCTTG  
AGATTCTCAATGCATTTGTTAGAAAGTGTCCATCCAATTTACAAGGATTT  
TAACAATCTTTCTTAGGTCGGATTGCAAAGTAAGCCAGAAATCACACACT  
TCAGCAATCTTTCCAGCGTCAGGAAGTAGACCTGGTTATTTTCAACCAA  
ATTAGACATCACTTTGGATGTTTATTCTCCCAATTAGCTGCTTTTTGCCT  
AATCCTTCTAAGTTTCTTTATGATTTTTTTTTAAAGAATTCTCTTAGTTTCT  
GATTACTAGAGGCTTTAAGTGTGGTCTATTGGAAATCTTCATCACATGTA  
GAGGGGAACACAAAATCATTATGGAACAAGGCTCCAGCTAACAGGTACC  
CTCAAGCAATCTGAAGACTGATGGAATAGCATGAAAATGGAGCCAGAAAA  
TTAAGCTAAAAGTGGTTGATACAAATTACATAGTGCTGTACTTTTCCAAA  
ACTGGCATGTCTGGGTATGTGAGGTCTTAGTTTTTCCAGAAGCTTATATTT  
TAGTGATAGAAGGCATAGCACACCAATAAGTAACAATGATTAGAAAAGAA  
AATGTCAGATACTGTTAAGAAAAATTTAGGTAAGTGTGCTGTGAGCAAAC  
AAAGCAGTGTGACAAGTGATGAAGGTCTTTAGAAAAGCATACTCAAG  
AAAGACCCCATTCAGGAGATGGTAGCCGGGGTCCATCCTGAATGAGAAGC  
TGGCCATGTAAAGCTCCTTGAAAGAGAGGACAAAGAAAAATAATAGGAAGC  
ATAAGGACCTAGAGTGAGGATAAGATTTTTGTGGTTGTTCTGTTTTGTTT

TCTCCCTTTGGGATCAAAAAGGTCAAGATTGCTGGAATGCAATTTGTATA  
GAGCAGAAGGGTATATGATATGGATCAAAAGTAAGCAGGGACTAGGTAAT  
GCATTAGTGCAGTGAACACAATGGCGGCTATAGGACAGTGAAATTTACTG  
ATTTAATTCTTAAATCATCCATCATTCCAGTTGCAATATTGAGTGTAGGT  
TGTTGGGGAACTAGCAGGGACGTTATCATTGGGATACTGATTGAGATGC  
AAATAGAAGAGAATCAAGAAGTGGTTGCTTAAATGAGAGAGCATCATTTT  
CTTTTATGTAATAGTAGGCGATTTAGTGTTTATATGGCAGATCCTTTGGT  
GTTGAATCTAGGCTATTTCCAGATATTCATTCTATCAACCGTAATGGGTC  
TAAAAAAGCATGGAGGGGGTAAATGAAAGGTCAATTTTCATCTACCATTCA  
GAAACAAGTCACATATCTAAGCTGGCTTGGGTCATGAGCCCAGTTGCAAA  
TCAGGCTGATGCTACAGCCATCATGCCACCATATAAAGATTGGGCCTAAA  
AGGGAATATGCTAAGGTGGTCAGCTAAAAGGATGGGAATCCTTGAATCAT  
TGAATCGACATCCTTGAGCTACTGAATTACCCTAACCCAGAAACACCCTC  
TCTTGGGGACTCTTATCATGTGAGATAATAAGTATGTTATACCTCATTCA  
TTATGAATTGGGTCTTCTGTCCCTTGCAGCCAATAGATTCCCTAGGTGACA  
AATTTTCAGGTGAAACAGGGTGAAAATATTTATCCAGTTTCTTTGGTTAGT  
CCATCCATGTGATGAACTAACATGTGTTTTTTCATTCTTAGGATCGAGAT  
CAGTCCCCTTGGAAAGTTGTCTTTTCTATCTCTGATCCTAGAACGATAAC  
ACCAGTGGTACCTTCGTGAAGCAAGTTGAAAGTTGAAGAAATCCATAGAA  
TTCGTATGCAGGGCACCTGAGTGGCTCAGTGGTTGAGTGTCTGCCATTGG  
CTCAGGTCATGATCCTGGGGTCCTGGGATCAAGTTCTGCATTGGGTTCCT  
CTCAGGAAGCCTGCTTCATGCTCTACCTGTGTCTCTGCCCTCTCTCTCT  
GTGTCTCTCATGAAAATAAAAAATAAATCTCTAAAAAAAAAAAAAAAAAGAA  
TTTGTATCCAAATCTGTGAATGGAAAACATCAGAGACTGGAGCCTAAATT  
CTATTTTCATATTTAAATCACTGATGTTCCCTAGGTTGGTGGGGGTCTCCAT  
TTTGGTTTTGCCTTGAAACCTACTATGTGGCATTTTGGTTCACTACTTGG  
GTATAGAGTCCAACAGGCAAGGGCTTTGGTGGATTTCAATTTTGCATATT  
GCACACATGTCTTAATTGCACTGAGATTTCGGTTCTTCACATGAAATATGA  
GGACTGATAAGACTATTTAATTGCATTATAATAAGATTAAGATTAATAGT  
TCACACATATTGAGGTTTTACCAGGTACCAGGCACTGTGCAAATGTTAAC  
TCTTAATAAGGGAGATGCATGTATTATTATTCCTTCCCCCTGCACTGGGT  
GAGAAAATTGAGACAAAAACCATCTAACAACCTTGCTCCAGACCATTTCAGC  
TATTAAGAGCTAGAACTAGGATTTGACTCCGAGTCATTGGGCTCTAGAGT  
GTGCTCTCTCTGCCCCCTCTGTTTTTAAATGCAATATTGCCTGCAGAGTG  
TTTGGCACATACGCATGCAATAAATGTCACCTAGTATTTTTATTTTGCAT  
TTTCCCATTTACTTTATTTTGACTTCAATGTGGGAGAGGTGATTATCCAA  
AGATGTGAATTATCCAAGGATTGTGATAGTCAGAGGCAGAGGAAATATTA  
GATTTTTCTGAGTAGGAGTAGGGTTAAAGAGTCTCAGTGCTTGAACCAGT  
CCAAAGCGAGAAACAAATGTCCAGAAGCCTTCTCTGCTCCACATCTGTTT  
TTATTTTTTCAGTTTATCAGCCTGCTGTTCCATGACAGGATTTTGCAATAT  
TCAGCTCCCCTGGTGACTTATAGGATATCAAGGGAAAAGAGAATAAAGAA  
AAGCTTTTAGCCAACTTCAGCTTTTCCTTCTTAAACTGAAGATAAGCT  
CTGGCTGGACACCATGAGGTTGGTTGAAAAGGCCAATTCATGTGTCTCCT  
CATTATCAGTGCAGAGGGGATGCTGGCCTTACCAGTGCCCAGCTCTATT  
GATAGTCCTTGTCCACAGGGTCAAGACGGTGGTGTGCGAAGATTAGACA  
AGCTTATAGCTGAGGATGCCCAAATAGAGCGTGGTTCTTCTCTCCTGGGG  
AGTGGGAGATGATCTCTGGTAGATCTTTGGTAGATGATATCTGTGTCATC  
ACACCAAAGGTGAGGTTTGATGAAAGCATGAGTAGTAGTGTGTGGAGGTA  
CATAGCTGCTGAGTCATCTCCTTACAAAACCAGCCACTTTTCATGTACA  
AGTAGAGAATGACCCTCTGCCTTTAATTTCTCATAAGAATTCATATAAAC  
TGCATCAAAAAGCCAGGCCGGTGACCTAACAGTCAATGAGTTCTCATTAG  
GGAGGAATAGCCATTGGCAGGTTGGTATGAGGAGCTTTAGTCGGGCTTT  
CGAGGTAATGCTCATCTGGCATAAAACTTTTTATGAGTGGTTGCAAATTGC  
TGACAACAATTCTTTTCTTAACTGAGAAAGATCAACTCCAGATGTTTCGCC  
TTCTGCTGGAGGAGACCAAGCCAGTGTCTCTTCCATCAGAAAAGCCACCA  
GAGTAAAAGAAGAAGTGACACCAGCATTTTGATCCCCTGAACTTCCTCTGG  
AGTTTCAGAAGTACTCAAAAGTCTCAGATCCCCACCTCAGTCGGGTCTCTC  
ATTGGGCTGCTGTTACATGGCTTCTCCAGTGTGTGGTGAGTAGAGATGGT

AAAGGATGGAAAACATTTAGGTGTCTTAAACTGTCCAGGTAGTGAGTGA  
TAGTTTGGAAAGAAACCACCAGGAAAGGCTGTGCAAAGACTGAGGCCAGA  
TTTAAACTTGTCTCATGCTGTGATCCAGAGCCAATAACCTGGTTAATTCT  
ACCCTTGGAAACCTAAGTTTTTCCCAAATAACCCAGGTGTTCTAGATGCATG  
AGGTCAATCGGAATACAGACTGGTCAAATGCTTCTTTGGTTCCTTTGTGT  
TCAGTATGTAACGAGGAAGAAGAGAGTTACACAGTGGGATTACAAACCAA  
ATGAGATAATTTATTATAAACCTGATTTAGCATAATGGATAAAATATGAT  
GCCACTTTTGACAAGAATACATATTCAGCTTCATGAAAGTGACTACTTCT  
AAATCTTTGCTACTACTCCATCTTTTACAGGTTTTTCACATTTTATTACAT  
TATATTAGATTTACTCCCCCTAACAAGTTTATTCATCATTTCAAATATT  
TTTTAGAACAATTTTTCTTTTTTATAGATTTTATTTGTAAGTCATCTCTA  
CTCCCAACTTGGGGCTGAAATTTACAACGCTGTGATAGTGAGTCTCACCT  
TCTACTGACTGAGCCAGCCAGGTGCCCCCAAACAAATATCTTTGATGCCA  
TAAATTTAGAAACTTGAATGAAGGATGAGTTTTTCTAAAAGAAAAGCAGA  
ATCATGTTATGGATACTTCTGTTTCTCTAAGTTTTCTATTTTCTGAAAAG  
TCCTCATTTTTATGATCATTTTTGAGGGTTTTTGTGTTGTTTGGCATATGA  
CTCTAGAATGGTGGGGGGGGTGGCCTGGTTTTGTTTTGTTTTGTTTT  
ATAGCACTTTAAAGATATTATTCATGTCTTTCTGCTTCCTTTGTGTTGA  
GGAGCTATAGGGCACTATAATGGTTATTTCTTGAATGCATTATGCTTAT  
TTTACTGTTTTTTTTTCTACTCTTTTTTAAAGATTTTGTTTTTTAAAG  
TAATCTCTATACCCAGTGTGGGGCTTGAACCTACAACCCCTGAGAGCAAGA  
GATGCACACTACCCTGACTGAACCAGCCAGGCATCCCTTCTATGAATTCC  
TTTGAGATTTATTTTACGCCATTTTAAAGTGATATATCTAGGTACCTTTA  
TTTTGTTTTGTATTCTTGGAGTTCACCAAGCTTCTTGGATATTTGATTTG  
AAGACTGTGATTAGTTTTTGGAAAATACCAAAGTCAATTCATTTTATTTTT  
TATTCTAGTTTTCTTTGAGTATGGTTGGCACAGGATGCTATACTAGTTTC  
AGGCGTACGACATGGTGATTCAACAATTCTATGCCTTATGCTGTGTTTAC  
CACAAGTGTAGCTACCATCTTTCACCATAACAACACTCTTACAACATCTTT  
GACTATATTCCATATGCTGTGCCTTTTTATTCCCATGATTTATTCATCCTA  
TAACTGGTTGCTTGTATCTCCCACTCCCTTTACCCATTTTGTGCATTCC  
CCCCAACCTCCCCTCTGACGACCATGAGTTTGTCTGTTATAGGTCTGA  
TTCTGTTTTTGTGTTGTTTATTCAATTTGTTTTGCTTTGTTTTGTTTCA  
GATTCCACATGTGAGTGAAATCTTATGGTATACCAAAGTCAACTTTAAAA  
TAGCTCTTGCTTCTCTCTCTCTTATTTCTTTTGTATCTTCAATTACAT  
CTATTATACTGCTTATTATTATCCCATGTCTCTCATATTGGTTCTAGGT  
TTTGGTGTTTTGTTGTTGTTGTTGTTGTTGTTGTTGTTGTTGTTGTTGTT  
CTCTCTGCTCTTCAGTTTAGATCATTTCTACTCACCTGTGTTTCCATT  
CACTGATACTTTCTTTCTTTCTTTTCTTTTTTTTTTAAAGATTTTATTTAT  
TTAGGGATCCCTGGGCGGTCCAGCGGTTTAGCGCCTGCCTTTGGCCCAGG  
GTGCGATCCTGGAGACCCGGGATAGAGTCCCACATCGGGCTCCCGGTGCA  
TGGAGCCTGCTTCTCCCTCTGCCTGTGTCTCTGCCTCTCTCTCTGTGT  
GACTATCATAAAATAAAATAAAATAAAATAAAATAAAATAAAATAAAATA  
ATTTTATTTATTTATTCATGACAGAGAGAGAGAAAGAGGCAGAGACACAG  
GCAGAGGGAGAAGCAGGCTCCATGCAGGGAGTCTGACCCGGGACTCGATC  
CCGGGTCACCAGGATCACACCCTGGGTGGAAGGCGGTGCTAAACCACTGG  
GCCACCAGGGCTGCCCCACTGATCTTTTTCTTGTGCAGTGTCTAGTCTGT  
TAAGTTTATCAGTCTTAATTTAAGGATTTTTTTTCAATTCTATTTTCCAT  
TTCTAGTTTCCATTTGATGTCTTTTGTAAAGTTCCCTTTTGTCTATTGAA  
AATTTCTATCTATCTTTCCCTTCACTGTGCACATACTCTTCTCTCTTCTT  
TAATACACTTATATTAGTTATTTCAAAGTCCTGCTAAGTGATTGCAATAT  
CTTAGTCAATGCAGAGTGGCTTCTCTCCTTGCTTTTTTCTCTTTTCCCC  
ATGGTTTTATTTTGAGGCTAAAGATTTCTCTATGCCCTTATAGCCAAAC  
AGAAGCCTTATCCTTCACTCCCTCCATTGGACATTTAGAAAAATCTTGTG  
TTTGTGAACCAATGAATAGAGAGGATCAGTTTCAATTTTAGGATTTCTCT  
AGATTCAATTAGGTCCTGCTAGTCTGTGCAGCTTTTAAATGTCTAAAGAT  
TTCTCTTTGCTCTAGCAGATACCCTCTGCCTTTGGCAGACACTATGTTTT  
ACCACCACGTGCCAGTCATGGACAACGGCCTGAGGGGAGAAGCAGCTTT  
TGATCATTGCTCACCCAAGGAGTGAGCTTCTATGGGACATAGTTCCTTC

ATATTCTGTGTGTTTACAGTTGAGTGTCTGTAGTTTATTTTCCCTGTACT  
TTACAGGTAGAAATATACCCCTTGTTTATATCTTTACAATATTTGTTGTA  
GTGGCAAGATAAACGGCATGTGTGATCCTCTATACCAAGAGTTGGCAAAC  
TATAGTTCAAATCTGGGCCACATCTGGCCTGCAGCCTATTTTTGTACAGA  
CAGTTAGCTAAGAACAGCTTTTCAAGTTTGCAAAGGATTTTAAAAGTAAG  
CAACCACCAAAGAAGAATATGCAACAGATGATACATGACTCACAAATTCT  
ATCATATTTACTACCTGACCACTTACAGAAAAATTTTATTGGTCTCCACC  
TATATTTTAATCAAATGCTAACATTGTTCACTTTGTTTTGTTTTGTTTT  
TATTCTGTTAGGCAGCAGAAGCTGAGTTAATACAAACTTGCTGCCAGCATT  
CTGGGAGCTAGTGAGGTGGAAAGCTGGGAATCTAAACATTACACGTATAA  
ACTTGTAATCAACGTCTGTTTTGCACATGAAGTCCTCCTTGTCAACTGAT  
GTCTCCCAGGCCAGATCCCATTTGGTTTTACTCACTCCAGAGAATGCACCT  
GCACAACAGTTAACTGCAGGAACATTGCTATCATTGCAACATTATTTTGT  
CTTAACACTTTCTCCTTATTCTTGTTGGGATTTGCTTTTCTCTCCTTTATT  
CCCTGAAATTATTATACTGAGGCATCCGGAAGACAGAAACAATGTATGTGC  
ATGTGATCTTCTTTCCATCTTTAACCAGACTCAGCTCTTAACTCCACTCT  
TAATGGTGTGGAAACATGCAGAGGAACTTACATAGTCAGAAGCATTGA  
AATCTGAACCAGAGGGCAGACTAGGTCATGACAGAAAAGCAATATCTCTA  
TCTCTTGGCAGATATTTGTATAGATAGTCTTAAGTGAAGTAGGACAGCTG  
TAAACAAAACACACCCTGGCAAAACAATAACATAAACCATGTTTTTATTA  
AAATCAAATGACATATAGTAATTCCTTTGCTAGCTTAATTTTATCTCAA  
TGTGGATGATAGCTAATATGAAGTCAAATTAAATGTCGGTATTCATTCT  
CCAGAAGTGCTGTTACTACAATGAAAAGAAAATTGATCTGCTATTTTTGT  
CCTGACTGTCCCTTGCCACTCCCTAAGTGGGCAAAACACTTAATTTTCTG  
AAGCTCATTGAGTGGAAAGAAAACTCAACTAGTCTTTTTTTTTTTTTTT  
CAACTAGTCTTTTATTTTATTATCTTCAAGGTCAACCTCAGCTTTATAAG  
TTTATCATCTGTTAAAAGAAAACATAAACTTACTTCATTGTGTCAGTATA  
AAGGAATCACCTTTCTGCCTTGCCAATAGAATCATTGCTAAATTTTATAT  
TTATATAAGTATTAAAATATTTCTTGGACATATATAAATCCTCTTTTTTAC  
AGTTAGGTGGAAAAATAAAGATTAGTCCATCAATTATATCAATTCAGGCA  
ATTTACCAAATGAAATCAACAAGAATCACAGAGATTCAAGATATCAGTGA  
CTCTAATCCTATAATAATTCTCTGATCAAGGTTTATTTTTTTCTTTAAAT  
AATTGTTATAGTTGAAGTCGTTGGGTAATCCCAGCAAAACAAACTACAAA  
TCCTATTAAAGAGTTTTTGCATACAATTCTGTATAAGAAATGCCTGATTA  
AATTTGTCCGACAGAAGTAAGTTGATGGGTAGTAGATTGCAAATTTTT  
GAAAAGAGGGAATAGAGGGAGGAAGGAAGTAATTTAAGGTCATGGTTTCC  
AATTTGTAAAGTTCATTTATAATATCTTTAGGGTAATTTGCTGATGACA  
GTAAAGCTTAAGGAGATAGATCAAGCTAATTCATTAAGTCTCTATCTTC  
TTGGAGAGGATTAAGAGATGGAGGAGCAATTGGTCTGCAGAATTTCAAGC  
ACCAGGGGAGTTCTGCAGACTCAGTCTGTGGACAGAACTAGCAGACCAA  
ATGATAGATCATTGCTGAATTACCTCCTTCAGTCTCAGTAGGGTAATC  
ACCATCATCATCTCAGGAATAGATTTTTTTTTTAAATCCACAATAATAAGA  
ATAGTAATAATAACTGTAATGGTAATAGGAAGAGTAACCTCCTGACATGCA  
TTAGTCATTTGCCAGGTGCTAGCTTATTTTATAAGAGGCTTCATTTCTAT  
TCATCTTTCTCACAACTATGAGAAAAATTTTATTCTTTCCCTGTCTTTT  
CAAGAAAATTGAGGTACAGAGAAGTTACATAATTTGGTCACAAATGAGGA  
GGCAAAGCCTTGTTTTAAACATAATCAGTCTGATTTTCAAGAACACATTTT  
ACTGTTCTTTATAAGATTGGATTGCCAAGTTAAATGTTCTATCCCTTGTT  
TCTATTCTGTAGAGAAATAGGTAATACTTTTCTCTAAAGACAAAAATTAC  
TTTCTAACACCCAGTCATTAGTGAAGAGGGACAAAATAGGATAAGAAAGG  
GGGCATCTGGGTGGCTCAGTTGTTAAGCTTTTGGCTCTGGTCACAATCT  
CAAGGTTGTAGGTTTGGGCTCTACACTCAGACTCTCAGAGTCTGCTTGGG  
CTTCTTTCTCTCTCCCTCCCTCTGACCCTATTTACTCCTAAAGTAAATAA  
ATAAATCTTTTTTAAAAATAGGATAAGATATAAGGAAATAAATAAAGGG  
AAAATGGAGTATAAATTCAAAAATTTTTAAGAGGCATGGACGCTAACTAT  
TCTAACAAATGGTGATTTGAATCATTCTTTCTTTCTTGTGAGTTTGGCAC  
ACAAGCAAGTCATTCAACCTCTTTAAATTCGGGTTTCCCTTTTTTAAAAAT  
TAATTAATCTATTTATTTATTCATGAGAGACACACACACAGAGAGGCA

GCTATATAAGCAGAGGGGAGAAGTAGGCTCGCTGTGAGGAGCCTGATGTGG  
AACTTGAACCCAGGACCCCGGGACCACACCCTGAGTCAAAGGCAGATTCT  
CAACCACTGAGCCACCCAAGCATCACTAAACTCCAATTCCTCATCTTTA  
CTTTGAGTATTATAAAGACCAATGATGTAATGTAGGTAAATAAACCTAAT  
ATAGCACCTAGATCAGTGAAATGATGGTGATTGCATTACCAGTGTTAAGA  
TTAGAATGTTCTCTCCAAGCAATTGGATAAAAAATTATGGAAAATAATTGT  
GTGTATTCTTTCAAATTTGTTCTGAAATCTTACCAAGTGTGTTGGAAG  
CATCTTTAGTCTTCCATACCATGAGTGATCTAGGGAGCAGCAGAGTAGCA  
GGAGCTTCTTAAAAATGCAGACACTGTGGCCACACCTCAGACCTGCCAAA  
TCCGAATCCCCAGGAGTGCTTTAAACGTTGAGAAGTACTGGTTCATAGAA  
ATGGGAAATGAACTGATGGCGTGCATACACAGGCAGAGGAAACAGTGAAA  
ATCCTTGATTTCTGGTTCAAATAATTGGAGACTGAAAAGTTAAAGAAGTT  
TTTCCCCTCATGTATTTTATTGTTGTTGGTTTGGTTTGGTTTGTTCATT  
GTTTATTTCGAGCTAATAGAAAACAAAAGGACCACAGAAGAGGAGATATCGG  
GAATAGGACACTTTAGTAATGGAACCAGGTCCCTGAGGTCTTCTTGAAC  
CAGAAAGAAATAGGATGGAACACAAAAGTGTCTGGTTTGTGGAAGGAAT  
CCAGTCTTCCAAGATAGAGAAGAAGGGGCCAGATGCAATTCATTGTGT  
GGGTACCTCTTCAGCAGGAAGCTAAAGAAGTTAGTGAACAAAGAGCAAGA  
TCTCAAGTGAGATGTGAGTAGAGCTGCCTTGAAGAAAGGAACAATGGTTT  
ATGGAGGATGGGAGAGAGGGATAATTACAGATATAATGACCTGAAGAAAT  
ACTGAAGCAGGTATGAGGACTAGGACATTTGCCAGAGTGCTTCCCGGGCC  
TGAAAGAAGATGAGCCTAACCGGGAAGCCATCCTGCCAGGCTTTGGCTTA  
CTTTGGTTCCAGAAAGGTGGAGAACTCTTCTCTGAGAGCTTGAAAATGC  
AGGTCCATGGTGATTGATGGAATGGGGACTCTAACGTGTGTGATTCAATTG  
GTCAGAAGATGAATTACAGTGGGTGGATAGATGAGGTGAAAATGAGCCT  
GGTGGCAGGAATTATCCATATCAGAATAAGGAAATGTATAAGAGAGGGAT  
GAGATAAATAAAGGCAGAGCACAAATGGGCTCAGGGGTATAGCAAGAGCC  
ATGAAAGGCATTTGGTTGAACATCCAGATACTATGGAGACTCTAATTGTC  
ATGTGCATTTGGTCCAACTAGTTTTGAAAAAGAGGGCGAAAAGGAAGGA  
GAGAAAGAGAGAAAGAGAATGAGAGACAGAGAGGAGAACCGATTGCTTTC  
TGGGACAGCACTTCAGGCTCTGAAGTCAGAAGAGTACACCCTAAAGTATG  
ATTTTATACTAGTAAGGCATCCAGGTTCTAGGGGCAACTTGCTGAACTGA  
CTCATGCTGTGTGAATGCAGCCACCATGAAATGACAGTAGTATTTATGAG  
GGGCGACCCCTCTCTTTTTGCAATTCTATCTGACCCCTTTTTATAATGAA  
GCAATATTGTCGTGCTCACTGAATCAAAGCAGGAAACCAATAGAACAGAA  
GTAGGTTAGTGGACAAATAAGTCTTCCTTCCAAACAGGAAAAGAGCTGGA  
GGGAAGAAACACATCAAAATCAATAACAGAAAGTAAAAACAAAGAATCAA  
AACCTCACTTACTTGTTCACTTTAGGGTTTTTCAGAGATGAAGCAAAATCT  
ATCCAGCAGAGAAGTTCCCATCCCACCAAGGAAACCAATCATCTCCTCTG  
GCTTAAATTTCTATCAGTTAAAGACTGGTTTTTAAGTGAAAATTTCCAAC  
TGACTGGATTTGAGGGAGTAGGAAATTAGCCAAAATTAGTCATCACCATC  
TTGTACCTTTTTCTGATCAGATTCTTTCTTCTAATCTCTAGATGAATT  
ATTCCAGATAGTTGTGTATAATGTATATATTTTATTTATGTGATATGTAT  
ATATAAGTATAAATACTCATATATATGAGTTGATATATTATATATAATAT  
ATACTCATCATATAGAAAATATTACATATAAATAAATATATATACATAAC  
ATACTTATTCTTTTATTTTTTTATTTTTTAAAAGATTATGCAAATTTGAAA  
AACTCTAAAAGAAAAAGTCTTCAGTGCAAATCATGTTTTCTTTCTGCCAA  
TGAGTTTCTGTCTCCTATTTCCCCACCTCAGAGTCACTACTATAAAGGCA  
TTAGGTAAAAAATCTATAGATAATATGGCATATACCAATGTGTATAACCT  
CCCTTTATCACACAGTTTGAGTTACTCTTTCATTCTGCATTTTCACTTTG  
TCTTGGAAGTCAGTCCATATGGATACATACAGACCTTCCTCATGCTTTTC  
TGCGAGCTGTAGCTCCCTATTACTCCATTGGATGGAACCACTACTTTG  
TTCACTAATCCCCTCTTACTGCCTGCACTTAAACATCCTTTCTGGGTGC  
TTTACCTTCTTAAAGTAATGACACAGATGCCTTCTTGACCTAATTATCTG  
CACACAATAATCTATAATCAAGACCGTAAGAATGGAATACTTTATCAGA  
ATACCAGAATATCAGAATATGTAGAATTTGATACCTTTTGCAAATTGTA  
CTGGGTAAAGAGCTATACCCCTCCATATATGTATTTAGTGACAGTTCCCC  
TCATTCTCTTTGATATTACACTTTCTGGTCTCTACTAACTAATTTATTT

AAAAATTATAGCTTTATTTTGAATTTTGAACATTTTCATATTTAAATTTAA  
TTTCTCTTTACTCTAGGAACCTGTTCTTGTTCCCTTGCCAACATTTTC  
ACTAGAATGTTTGGTTTCCCTGACCAACTTGCTTGAGTATTTTACACTAG  
CTCTTTTGCTGTCATACATGTTACAAAATTCATTGCCGTGCATTTGACTT  
TGTTTCATATGCTTTTTTGTTTTTTCTTTCCCTTTTGGGCTGAAACATTTA  
ACAAGTCTTTCTAAAGTTTTCAAAGACAAGCCACTATTACTAGATGAGGA  
TGCTGAGTAGGGAAATCTGTTTCCAGGTGTCCCTAACATATCTCCACATC  
ACACTTCCATTTCTAATGCCAAGCTACTGCCATATTTTGAGATTCAACAC  
GCTTCCATCAAGGGAAGTGCCATCATGCCACCACCTTTCAGACAGTTTAC  
ATTTATAATGCTTATATTCTCATTTTGGCTTAATTGCAAAAAGAAAGGGAT  
TTCCAACACATTTTTCTCCAACCAAGGTTTCAAACATGATTCAATGAAG  
CTACCATATATGATGTTGATAACTCATTGATTATGAAGACCTGACCTGGA  
ATGAAAAGCATATAGAATGGAAATGAAGGGTGCAATTTGAGGGGGCAATAGT  
TATAAATAACTGGCAGTGTTTTCAGAGACTGATAAGGTAAACCCACAAGGAT  
ACAGGAGTGAAGCATCCAGAATGGCTCCAGTGGGGAGAGCACATATAGTG  
TAGTGGTAGAGCTGTTTCTGTGGAAAGAGAAGGATCACAGATAGTGAGAA  
AGTGTAGGAGCAAATTTTTTTCACGTATAATTTTTTATACGCTTAGTTATATA  
TTCAGTTTTTTTTAAACAGCTGAATCATATATAAAAAATATTGTAAACTG  
GCTAAGAGAAATAAACATTTAGCAGACCACTTAGCCTGCACTATGGGGAC  
ATATTATTTTGCAGTAAGTTATAATAGTTGTGTTTCAATAGCATTGAGAT  
CCTTTATCTAATTGGATCAATTCATTAGGCCAAATGATGGTGCTCTGATG  
ATTTGAAAGCCAGATATTGCTCTGCTGCCTTAGCCAAAGTAGTTTACACCA  
GATGTTGAGACCTGGCTACACAGACAAAGCAGTCTGACCAGCTGTAGGGG  
ACCTATATTTTGGCAGCTTCATGTGAGTTCTTATTGGCTCGGGCCCTTTA  
TTCTTACAGAATTGTTTTGTGGCTAGGAAGAAACGCCGTCTTCGCAAGGT  
TCTGAGAAGCCACTGTTGCTGGGAGAGTTGCCAGAGAATGAGTGAAAAGC  
TAAGAACAGCAATCCATAGATTTGCTTTTAGGGCTTTGATACAGTACACT  
TCTGAAGGCAGTATGCCATTAGCTTGAACAGGGAGCAAAGCACCTGGTAC  
TGAGCCATTTGCCAGTAAACTGATGAATAATGAATGGGAATGCACGTAA  
TGATGAGCCAAGAGGGAGATTTTTCTATGGCTTAATCTGGCTAATGAATT  
AACATTAATGAAATTTCAATAGTGTGGGTATCTACAGGTTTCAGGTGCTT  
GAATGCTGCCCATCCCCCTCTTTACTTCTTAAATAGAAAACATCACACA  
TGCTAGTCTACCGTGCGTACACTGTCAACCCACCAGATTCTAAAATGACC  
ATAAATCTCTGTAGCTGGTGAATCTAATTCCTTGTCTCTGTGATTATTTA  
TTATGGGTAACAAATATATTTGCCATAATGCACGCCAAGTGTGGATGAGT  
GTCTTGAGATCTATTTGAAGACCTATCAGTCATCTACCTATGCTGATTTA  
ACTAAAAATCATCTGAGTTATAACTCTAATATGAGTCCATTTAAAAATAA  
TGCCGTTTTTTACAAGCTCAGATATTTTATTATTCTTCAGCATTAAATGTA  
GGCAATCTCCCACTCAGAAAGAGGAAGTGAACCTCTTATTACTCTAATCA  
GTTGGCTCCTCATTTAATTTTATCTAAAGGCATCTCTCAAATTTATCTCC  
TTACCCATTTTCATCTAACATAGTGCCATAGAGCTAGCATATGATTAAATT  
ATAAATGAGATCAGAGTTAGAGCTGTGAAAAATATGGGCAACATTCTATG  
TTGATCTCATCTATCCCTAAGGCCCTGGTCCCTCACTACATACAGTGGA  
ATTCCCATTTTACTCTGAGTGTATGCTCCATTTATCCTTAGATCTCAA  
GTGTATCTGACAAGGGTGATGTTGCACATTATAAAAATAAGATTTCTCAA  
CTCTGCCCATCTGTTAGTGATACAGCAATCTAAGTGTCTATATATAGAA  
CATATATACATTTTCTGCAATTGCATATTCTTTCAAATATTTGCACTTGGC  
ATTGCAAGGTGTCCCACTGTCTAATACAGACAAGTCATTCATTAAGCTGTC  
AGCACCTTGCTACCTTGCTCCCATAGAGGGCCCATTTCTATGTTTTCTGT  
TTCTTGTTGGATGACCTATTCATCATCATGAGCTAAGCAGTTACTCTCA  
AAACGGGTGCAACTGAGTTGTTTCATGTCAACATATGTAACTAAAGTTCT  
GCTTCTTCATTTCTAGTGGTCCAACACTTGACTGGTGACTGGAGGGCACT  
AATGGATTGGAAGAACAGCTTGCATTCATGAGAGTTAAGTTGGTGTCAAT  
ATGATGCAGCTCTTGCTGAGACATCTAAGGAAAGGGCATTAAAAGCAAA  
GAAGTAGAACAACAAGTGACAGCAAAAAAAAAAATACATGATTAATTG  
TAAACATTGTTTTGAAAAGCTGAACAGGAATCAAGAAAAGCAATTAGCTAC  
CCAGACTTACACATTATAACTATTTGGAACAGATTAAGTGGGAAATTGCA  
AAAAATATATTTAACCTAAAAGTAAAGCATCTAATATGGCATTATATGAAA

GATGAAAAATAATGAAAAATTAATTTCTGGAAAATTAGAGCTCAACCCTTC  
TGATTTTTTAGCTTTGATTTTGTGTTTCTCTTTTAAGAGGGCTTGTCTTC  
CTGAGAAATTTTCATGTTCACTGAAAAAATTAAGATCATTCTTTTTTACT  
CATTCGACATCTTAGCATATAGTCTCTGAAATATTCAAACCCCTTTCCTT  
ATTTTCTTCTTGACCTTTTGCCTAATCTATGATTATTTATATTCTAGAG  
AGCAGAAAAC TGAAAAAATAAGAGAAAATTAAATTGGCCAATTTCGCCT  
TCTAATTAACAACCTTGATTCAAGCTTGACAGAAAGTAGATTAAACTCATT  
AACTTCAGGGAGATCCGTGGTTAATCTGTACTTCCACTTAACCATGCACT  
CTGCAGCATCGGCTCTAATAAAGATGAAAAGATTGATGATAAAATGTAAG  
AGACAAATATTCTCTATTCTCTCACACCATCTTCTAAGTTACAAAGGTT  
TGGGTTTGTATTATGGGATAGAGCTGTTGATGCATTATGTTACCTAAGA  
TTTATTATTCTGAGCTTACTCTGGCAAAGGAATAGAAAAGACCACCTCAC  
TAATCAATTAAGTCATTGCATATTTTATAGTGTGTACTTTGCTGTACTCA  
CTTGAAATTTGGTGCTTAGGGGAAATGAAATGTCTTCCCTCCCCAGGACTAT  
AAAAGAGCCATGAGAAAAAAGCTAATTCCCCATCCCCAACAACAAAAA  
TATCAAATGGAGCCATCCCCATTCCAGAAACACAAATGAAAATATAGAGA  
GATTACATGAAATCATTGTGTTAATTTATCTAATTAGTATTGCTTTTCT  
GTAGAACAATACATCTAAACTATTATGATCCATGTTGGAATTAGATTTTT  
TTTGTCCCCACTATTTTCCAAGAGAAACCACTTTGTCAGACCAGAATGAG  
ACATTGTCCTATTGTGGATTACTTGTTTTTTGCTATTCTGTAACCTAAAG  
AAGCTTAGCTTTACACAGTCAGTGCCCACCATAATAACACCATAACACCA  
TTCCCCCATGATTTGAAGATTTAATTATATTGACATAAATGACAGACTCT  
AAGGAGGCCCAATAGAAGTCACAGTAGGTTTTTGCAGTGTCTGTATGTA  
TGTGTTTGTGTGTCTGTGTGTGTATAAAAATGTTATTCTCTCCAAGCTAA  
CCTGCATTGAGTATTTTAGATTGAAAAGTGCATACCTTTGATTAAATATG  
TTAATATTCTATTTTTTAAGATTATTTATTTATTTATTTATTTATT  
TGAGAGAGTTAGTGCTCTAGCACAAGCACAGGGGTGGGAGGGAGGGCAA  
AGGACAAGGAAAGGGAGAAGCAGACTCCCTATTGAGCAAGGAGCCTGATA  
CCAGGCTCTATCCCAGGATGCTAAGATCATGACCCAAGCCAAAGGCAGAT  
GCTTAAC TCACTGAACCGCCAGGTGCCCCAAATATGTTGTTAATATTCT  
TATCTCTTCATGAGTATTGTGGTCAGAAATCTGTGTTGTAGGCAGCAACT  
GGTAGCAAGACCTGGAATAACTTTTGCCATAGGGATGGTGTTCAGCTCTT  
CCATCATGTAGCTAATGGTTTCTAGATTGTGTGGGGAAAAGAACAAGGGT  
AATAAAGAGATGATTTTCATTCAAGAAATATTACCCCTAATACCACTATTT  
CAATCACAATAAATACAAAGAAAGCGTTAATGACAAACCATTGTTTGGGG  
CCAAATGAGAAAATCTAAGGGAAAAGAAAAGAGGAAGTGAGAATGCTAGC  
CATACACTTCATCAGCCTATGTGATTTCAAGTCATCCTTACAAATCTCAA  
CAGAAATGGAGGATGATTCCCTATTACTAGAGAAGGGATATCAAGGAGCAAT  
CAATGGCTGGCCTGGTTTCTTATCCAAGAATTTGATCCAGCATTTTTTCAT  
TGTTTTATATAAATCTTATTGCATTGCTATTATTATTATTATTATTATTA  
TTAATTATTATATTTTCAAGATCAATTGTGCATCTGTCAGAAATGCTACTCT  
CTAATATATGTATCATTCTCTTTTTAACATATGCATTATTTCTGATATC  
AATTGGGACATCCCAACTATTATTGCCTTCTATATTTTCATTCTCTCACT  
TTCCAATCAATCATCTTTTAAAAATGCATTTTCAACTTCTAATTTTACA  
GTAAGTATGTAATTCAGAGATTATTTTTGGTCCATTTTCCACTAAGACT  
TTCCAAGACACTTTTAAATGACACAGGGTGAGTTAATGCCTTGTTTAAGGG  
AAAGAATGATGTCTGCATTTATCCAGCACCAAAATCTCCAATACTTAGCAA  
ATCATACAGAACATGGTAGGTTGTCGATAGCTCTGTGATTGATGAATTG  
AAAGGAAAAAAGAGAGAAAAGAATAAGATTTTGAGCTATTTCTCTAGC  
TTGAAAATTATTTATAAAAAATCTTTTTTATTCTAATGTCAAATCTACATT  
AAACATTATTTACCCAGGAAC TATAGCCTCTATCAACCGATTCCAAGCA  
GAACTTAACGCAAAATAAAATGATAATTCACAAGCCCATGGTCACTCAA  
CCACTTTGTTCTCTGTGACCAAATCTTGTAATTATGGTGAGTACGGGGTA  
TAGATTTCCCAACACATTCCAAC TTCAGATATCCTCCCCATTGTTCTGA  
GAAATACATTTATGGTTTCTGACTGTATAAATGCTTTTCTTTTCTTTT  
TTTTCTTTGTTAAAAATGCTTTAAATCGCTCAAGTTTTATTTTTTTCAA  
TTTTTTAAATTTATTTATGATAATCACAGAGAGAGAGAGAGAGAGAGG  
CAGAGACACAGGCAGAGGGAGAAGCAGGCTCCATGCACCGGGAGCCTGAT

GTGGGATTCGATCCCGGGTCTCCAGGATCGCGTCCTGGGCCAAAGGCAGG  
CGCCAAACCACTGCGCCACCCAGGGATCCCATGCTTTTCTTTATTGTCAT  
AGAAAAATATGACCATTGTGTCCAAAAAAGTTTGCATACCAAAGTCTTCT  
CTAAAAAATCTCCAAAGCTGTGCTCTACCTCATGGAAATTAGGATAATT  
CCCAGAATAACACCAAAGCATGAGAATTAAAGTAGCAGAGCAGACAAAGT  
GATTAATGAAAGTAAAAGTTCATCTAGGAGACAAACTTTAAATATGAGCA  
TTACCAAAGGGACAGATAAAAAACAATTCCAAGTGAGAATCTGAAGTGTGA  
ACCTACAGAAACATGGATCAGCAATTTTCTTGGATAAGTGAGAGAGCAGA  
TTAGCGTATCAACTCTACCTAATGAGGATCTGTTGAAGATGCTCATGCAA  
GACAGTATAACGAGCATGGCCCTCACACAGAAACATATTAATGAAATGGG  
GAAACACATTAATGGACTTTTCAAACCTCCAACACTGTCTCAATCACTTT  
TACCAGTAAACAAACACAATTATACCTTCCAGAAATAAATCTGTTAGTTA  
TTGTCCAAATTCAGTTTCAGAGACTGAGTTCTAGAAACCTGCATATGTCA  
CAATATGTACAATGAAGGGTTTTCATAAACTGGACCAAGTCATTAACGAG  
TTGGAGTTTATTTTCCAATAAGTCAAATTGTGAGGGTGGTTGTTATGTTT  
TTGTTTTTATGACAATGCTCTTTTTAGCCAAATTTATATGTGGTTAATTT  
TTAAAAATACATCTAAATTACCCACTGAATTTGACTAGACTCAATTCATC  
GACATCTGTTTGCTTCCCTGCAAATGGTCCCATTTCTAAGATTTAACAAA  
TTCATACCTCTCATAATATCAATTTTCTCAGGCAATTAGTTTGGCACTGG  
AGAAAATACTGGTAACCGGACCACATAGTAGCCTGCTCAACAGGCAGGAAT  
CCAGCCGCTATCACTTATTTAAATGTACATGATGGAATTATTAGGGGGTT  
AGCTTTCCTTCTTTTAAACAACCTTAAGAACATGGTTTACAAGTGTGTTTT  
TTATGTATAAAGTTGTCCCTTCATAAGTATGGGGTCAGCATCAAAGCAT  
TCCAAATAAACATGTCAAATACTATTTTGCAAATTTAAATTTTCATAAAC  
TATAACTTCTTCATAAATAACAGCCACACACACACACACACACACACA  
CACACACACACACAAAATGATTCCCTGATTAGTGACAGATTGGGGAAAAA  
AACAGCACAAAGTTCAAAATACCTATTTTCAAATTTTACTTTTCAGCCAGG  
AAGAAATATCTTTCATCTCTTATTGACTCAAACGCTACCTCCAAAAAAG  
GGGGAGGTTAGGGGAAGAAAAAACATAATCCGGAGACATGCAAATATTT  
AATAATATCCCTTGTGTTATAAGAGTCTTATATCTACAATATTCAAACCT  
CTCAAACAAAAATAAAGCCTAACTATCACCATTGAGATCTTAGAATTTGT  
TTTCATTTAGGGGGTCACAAGTCACCTACGACCCTCTCCCCAAAAA  
CCATGAGAGAGGAACCTGTTTCTGGAAACCTTAGAATCTTAGTTTAAA  
ATTCGATGTGCTTCTTATTCAATAACATACTATATTTACTTAAAGAGGAG  
TTATCTTGGATAAAGCTCACATCAAATTTTLAGGTGAATGAAAACAA  
GAGCCAAATAAACCTTGGAATTAGGTGAACAGAGTTTCTGGTTTAAAAAT  
GGCCTCTGTCTAGAAGTCCCGTACAAAGCTTCTCCCAAACTCCCACGAAA  
AGAACTATGTAAAGACAGAAAAGATGCAAATTTACGACCTTATAAACTAA  
GATTGACAGATAATCTAGGGCCTGAATCTGGAAGGAATTTTCAATAATTC  
GAAGTCAGACATAGTTGAGTGCATTAACCAATTGGTGCCCTATGTGTGT  
GTCATCTCATGAAATAGACCAAGTCTTGACAGAATCAGAGATGCCGAGA  
GAGAGCAAACCTGATCCACACACCTCCGGGTTCAGGCAGAGAAGCAGGGT  
CTACACTGACTAAGAATGATCATAGCTGATGCTCTTTTCTCTTTCCTCCC  
TCCTCAGCCCACTCATCTCGTATGCTCTTCTAGAAATGGAAACCCCAAAA  
TTACCTGTATAATAAGAAAGAGAGAAGCAAGGGAAGCACAGGCTGGCAGT  
GACATGATAAACCCTGGCGGTATAGACCCACAAATAAAGCTCAGGAGAA  
GAGCACAAGGCAGAGACACAAGGTGGATTGCAATTGTTTCATAGAGATGTTA  
GGAGCTCTGAACATCATCTAGGTCTTCAGCTAGAGACCTGAGGTTAAGTT  
TTGCTCAGCAAACAAATGACAAGCAAGGGTCGATCCATTCAATCAGAAT  
GTGGAGTCTGGATACATTCTTATTCATTTGATGGGGGATAAAAGTAATGA  
TAATTATAACAGTTACTAAAAAGTTACCATGTGGCCAGATACTATTCTTC  
CCTCTTAGAAATATTTAATCACTAGTCCTCATAAACTCTATGCAGTAGG  
TACAATTATCCCCATTTTTCTGATGAGGAGACTGAGGCAAACAGAGTTCA  
CTTTGAAGCCATTTGTTCAATTATATGGTGGTAAACCCAGGCAGCCTAGA  
TGTAAGTCTCCGCTCTTCACTATGATTTTAAATAAATAAAAAATGTAGAA  
AATATTTTTTTTTCAAATAAAGCCTAAGTATGAATACTGTAACATGAAAT  
AAGAGAATTATTACCCTGAAGATTTTAGGAAGACCATGTGTCTGAAAACG  
ATCTATTAAAGGAACCATGATAATAGAAAGATAATAAGAACTGTTTAAC

ATCCTGAAGAGGTTCCAAGAAGACATGGCCTTTCTGAAAAAGGAATAGAA  
AGGCAAAAAGAGAGAGTTGGTTGGGTAAATGAGAAGTGGGTGAGATCAA  
TAAAGATGTAAATGTGACAGATGATTGCATTGGTGACACCAATCCAGGGC  
TTCCCTTTAGTCCCTCCCTTCGGAATGTGACTCTGAAGTTCTTCCAAGAG  
GTGAAGTCTATTTTCCTTAGCCAAGAAATGGGGTTGGCCTTGAAACATGCT  
TTGACTCATAGAATGCTCAGAAGTAGTATCATGCTGGTTCTGAAACTAGA  
CCTCAAGAGATTTTGTGTGCCTTTTCTCCCTCTATTGGGCCTCTCAATCT  
TTCAATCTGCCCTGAGCATAAGTTCAGGTACTCTGTTGGAGGATGAGGGG  
CTACATAGGGAGGTGAGGGGTGAGCCCATCTAGACCGGCAAATCCCCAG  
CCAAC TTGTCAGCTGAGTCCAGGTGAGATCAGCCAAGCCTGGCCCAGAGC  
AGCAGAACTGCCCGGTGACTCATGCACACACAAAAATACATTATTTCT  
GTTCTAGCCTATATGCTTTGGATTAGTTTATCACTTAGCCACAGCTATGT  
ACTATGGAGTCTAAATATGGACCTGGGAAAAAATAAAGGTAGAAAATGCC  
AGAAAATATCAATTACTGTCTCTGCCAATTATCTCCTTCCATTTTTATGCT  
CCCCCTAGAAAAAAAATATATGCGCCAAACTTTTTTTCTGATCATCTG  
CCCTCACAAGCTCTTTTGAAGGGGCATTAGGCCTCCATAACTACTTTGGA  
CCTAGAGTAGAAATCTGGACCACCCTAGACCCATGAGATTCTCTCTTATG  
AGAATTTAAATTTAGCTTCTGAAGAGCTAATCAGCATCTGAGAGGAAGCC  
ATTTGGAGGACAAAAATAAAATCAATACACAAAATGAAGTAGTAAAAAA  
AGCAAGTAAGACCCAGAGAAAAGAAATAGAAAAAACTATTTATGCTGCGT  
GTCTCTCCTTGGGCCCCCTAGATGTTTATACCTTGTTTCCTTTTTTT  
TTCCATTATGAAATATGTTTCCATTTTGTGTGCCTGTGAGGGTAGCCTAC  
CCATTCTCAGGACATCTCATTTCTAATTATTTCTGTGGTTTTCAATAGG  
ATGGAATGGCTATTTCCATAGGATGGAATACTCTTATTTATTGAAAGAGG  
ACAAGATCAATTTTTAGCAGCAACCACGTAGAACTATTGTAAGGTATGCT  
TGTCTAGTTTTTATTACCAGGTGCTCCCCTTTATCTAGTTGTCTGTCAC  
AAAAGGCAGTAAAAACATAGGCTTTCAGGAGAAAATTTAAATTAGTCT  
TTTCTCTTTGATTTTTATGATGTTGGGTGTGTTTACACATGAAAAATAA  
AATGGGGGGATTGATACACTTGCTGAGAAAAATCAGCTTTCATGACACA  
AAGAATATTGCAAAATAATGGGAATTTCTCTCCCCCTCCTTCCAGTGGC  
TCTTGCTGTGCAGATCCTATTCTGTTTCTCCCAGTGTTCTGGAGTGTTCT  
TCCCATCAAGTAGAGGTAAGACCTCCACAGCAGGAAACACTGCATGGAGA  
TGGAGGTGGAGATGGAATTCATGGTATTTCTACTACTTTTTGCATGAGT  
CTTCTTGTCAGTGGTGTAAGGTGTCAAACAAAGAGATTTTGGAACTGTT  
CCTCTTCTCCTTTTTTCATGTGCTCAAATCAACTATTGAAAAATCCAGTT  
TTGAAGAGCCTTCTCACTCACATCAAATCCACTGGAAAAATTGCCTGTGT  
CTCCACTTTGCTTTATCTAAAAATTTGAGTCTAAGGTGGGTTTCCTGGAA  
GGGTGTCAATCTACCATGTTTCTTTTTCTGTGCCTTTTAGAAAAATGATA  
GGTGAACCTTGCCTAAATCCAAATGAATATAACAACAGATCCAAAGAGAT  
TGAGGTGCTGATACCAAAGCTGCCTAAATGATTTATTCATGTCTTTACTA  
AAAAGGAGAGAGGTGAAGGAGAAGAAAAATGTGCCCTTGACCAGTTATTT  
CCCTTCTTTTTTCATCTTTTGTACTCATGTGCATTAACATGCCACTGGC  
CTGTTGCATAGATTGTCTGTCTCTTCTGCATTTCTATGCATAAAAAACAG  
ATCCGCTAATGCTGGTCCAGGAAGTAACAGCCTAGATCCTGAAGAGATCT  
TAGAAAAATGATCCAACCACCTAATTAACACTGATTCAAGACCATCAAACA  
ACAAGAAAACAACAGTAACAACAAAACAAGGCCAGAAAGACTGAACTAT  
ATTACTTACATGTAGTCATAGCCATCAATCCTAAATTTAAATGAATTAAA  
TGGTCAGAAAAAGAAAATTAATTAATAAAAAAAGATGAAGAGGATAAAAA  
AGAATATACAGATATTAACCTCTGAGTTTTCTGGCTTCAAGGTGAGAAAT  
AAAATGAACATTCAATTGACAGCTATGTAGGTACTATAGGAAAGAGTTTGT  
ATTTTGTGACATACAGAGGCAAGAGAAGGCAAGGAATGAGTGGGAAGG  
CTGGACCCAACTGGACATTCTACTAAAGCTTTGTATGCCTTTGGCCTAG  
TGCTTGCAAGTGCTCAGTAAATATTTGTTTTTTGACCAAATCCCTCTGTA  
GAACCCCAAGAGGGAGTGAAGAGAACACAGAGGAGCCAGATTTATAGCC  
TAGCTCCCTAAAGAGTCTAAATCTCACATTTTTTTAGTTTAAATTATAATAT  
ATATTTTGTGGAATTAATATCAATGGTGTATGTAAAGGAAGTGGAGTATA  
TCAGGCAAAGAGCAAAGGCTTACTATTATTACTGGTGGTGGTAGTAATGG  
TTGCAGAATTGAATGAGCTAGCAAGAGAAGCTCTTGGAGCAAAAGAATGT

TAACCTCCTACAAGTTTGGGCAAAGAGGGTCAGGGAGAAAAGGTGGAAGGG  
ATTCAAGAATAAGAAGTTAATTTGAGAATATAGCAGCTCCTTGCATTAAG  
AAAGGGAGTTTATCTTACCATCCCCTTAATTTGCTCTGTGAATTGTTTTTC  
CCTGTTATTACGTGGCAGAAATAAAGTTGTGTGAATTCTGAAGTCCAGGT  
CTTCATGAGTATGTGACTTTGGCCCTTTCTGTCTTGGAACCCTGAACCCA  
CAATAAAGGGAAAAGATTAAGTCAAGTCTAATGGATGATGAGAGGTCAAC  
TGGAGGAAAACCAAGGAAGCCAGTTAAAGTAGCAAGATCTGTGAGTGATG  
CCATCCTGGAACCTCCCAGCCTTAGCCTAACCATGAATGATGGGAGTCACA  
TGAGTGGTCCTAGGAAAGATCAGCAGAAGCACTCCCCATGTTGCCAAAGC  
CCAGAATAAACAACAACAACAACAATACTGTTCCAAGGCACTCAGTT  
TTGAACTGGTCTGTTACATTGCGACAAATAACTGAAATAAAAATGAGAGC  
AGGTTACTGCCATTACAAAAACCCAACTAATTGGCATTATCTTTGGACT  
GAAATCACTACAGTCATCTGATGTCCTCTGAATTTATCAGACATTTCGATT  
AAGTATATTGTCAATTCTCTATTAAAAACACAGTCTTTATAGACAAGAT  
ATTTACTATCTTATCAAGAAGATCTAGCTAACAGCAGCATAAAATTATTG  
CTATAGAAGAATCACAAACAAGTCTGTGATAACATAAAAGAAAAGGAAAGA  
GTTCTTACGGGAAACTTCATCAAGAACCAGGCAATTGAATTGGACTCACG  
AACATTCAGGCTGTAACAAAGATGGCGCTGATGAGCATTCAGCTGTGG  
GGACATCCTGAACAAAGGCCAGAGCTGAAAAAGCACAGAGGAGGTTCTG  
GGAAGAATGAACAGTCCAGGTTGACAGGTGTATGATGTGCAGGACAAGAT  
GCAGGCTTGAAGGAGTAGGAACTTGGATTGGAGGCGGAGTGCCAGGCCTT  
GAGGTCAGGCTAAGTAGATGAGACCCCTCAGGCATGAAAAAAAACATAGAA  
GGGTATGAGGAGGTGAGTCAACCTGATTTAATCAATAGCACTTCAAGGAG  
GTAGATTAAATAATAGCTCAGGACCCCTCTATGTATAATTATCAAATTTTC  
CTGACCTGTTTGAATCAAGACACTTGACGATGTGTTACACATCCTTGCC  
CTTATACTGTTTTAGAGAACAAATATTCTGGAATAATAAATGGTTTTTCT  
CTAAAAACAACATTAAACAATATAAATAATACCACCAGTTCAGATAGCCAC  
AGGATATTTTTATTCTGGGCATACCTATGCTCTATCCCAAGCTAGGGAT  
ATATTTACATCAAGTAAGACAAACTAAAGGAGTGCTATAGAGCCTTAAT  
TATACCAATAACATTCTCTGACATAATTGTCTGACTTTTTAAAATCGAGT  
TGTCTATATTTTTACTTGCTGCTTAGATCAAATTACTATTATTTCTTATT  
CAAAATTGACAAAATGTAATTTGATATAATCAGTATGCTTACCCTTCTTC  
TCTCTCATCAGATATTATCTGTTTGTTGATGGTCTACTAACAGATTCT  
ATATTTTAAAATAAGCAAGCTAAAGCAAATACATGATCTCATCACCTAT  
ATTGGGATATCCAAACATTAAACATCCTTACTAAGTTAGATTTATCAGTA  
AGAGGGACAAACAATCTCATTGGGGCTCAAATTGTGATATAACCTAAATA  
CTAGGTTGACCTTTGAAATTAACATGATTACAGTAAGAGCCAGCACATAT  
CCCTTGTTGTAATTAGTGGTTTATTATCTAATAAATGATTTAATCTAACAG  
AGATTCAGACACCACCAGGATTAGAACTCCCATGGTCCCTTATGACATTG  
TATGCAAGAATGCAATATTCCTTTAAAATCTCCAAAATAAAAGAAGCAAA  
CACCAGCTTGAGGCCAGACAAGAAGCCTGTGAACTTCAGACAGTTTTCA  
TCACAGCTGGCCAGGCCTGGGAAGTTTCAGACAAAGGACTTCCGCCTTTA  
TCTGGCCCTTATTTTGATGTCTCATTAGCTAAAGATAAAAGGAAAGATG  
TGCTTTGAAATTTAACCATTAGGACAGCAAAGAAATCAACATGCAAATGT  
CACCCATACATGAATTTGAGATGAATTCTACATTTGTCATTGCAAACCTTA  
GAACTCAGTTGGTACTTTTTACTCTCAAAGCAGTAGGATAACAACCTGTGG  
ATGAAATATGAGCATCTGATTTAGTTAAGTTGGGATTCCCTTAACCTTATAC  
ATTTATTTGCAGGAGCAGAGAAATATATATACATACAACTGATGCTTGA  
GCAATCTGGGGAGTAGGGATGCCAACGCCCACGCAGTCCAAAATCTGTGT  
ATAACTTTTGACTCCTCCAAAACCTTAACAATAGCTTACTCTTGACTGGAA  
GACTTACTGATGACACAGTCAATTAACACTTCTTTTGTATATGTATTTTA  
TACACTGAGTTCTTATTGATAGAGCTAAAGGAAAGAGGAAAGGGTTATTA  
AGAAAATCATAAGGAAGAGAAAAATGCATTTACAGTGCTGTTCTGTAAAAA  
ATCTGTGTAGAAATGGACCTAAACAGTTCAAACCTGTGTTGTTCAAGGAT  
CAAGGAAAGAGAGAGAGAGATAGGGGAAGAACAAAAAGACTATGAGAAGA  
GAGGAAATGAAAAATAAGAGTCTGATATTATGATATCCTTTAACTTCGGC  
CGCCAAGAAGGCTAGGGGTCTCCACATGAGTGTTTTCAAAAATCTTATCA  
ACTTCCATCAGGAAAACGAGCTCATTTCTTGGGAAGAGTACAGTGCAATT

CCAAAGAACCTCATACCTGTAGAAGATGGTAGTAACCCGAGATGTATGGA  
CAGTGTCCAGGATTTGCTCTACACATTTCCAGGGAAAAGATTTGCAAACCTA  
CAAAATATTAATTGGATCCATTTTCAAACCTAAGAATAATTGCACATATAT  
CTTCTGTGTCTAGTTTTTCCCTCCTGATTCAGAATTGTCTAAAGTGATT  
ATAAATAGTTTGTGTGATTTTATGAGAATTTTATGTTGGTCCCTGTATTT  
TTGCCATTAAAAAGTCCAAAGAGAATGACTTATCACCCCCAACTCTCAAC  
ATACTAAGTCATAGCTGAAAGAAGAGGGTGATTAAGGGTCAGAAAAGGAT  
CTGAAGAAGTTTGTGTTTGGAACAGAAGATTTACATTGGGGAAGGACATG  
ATGGTTGTGTCAAATAATTAGAGAAGTCCCATATAAAAGATGAACTTTA  
CTTGATCTAAGGCTGAAGTAGCAACAATATGTTAACCGCAGTGAAGAAAA  
ATATGTTGCTGTAATTTAACTCAGCCAAAAATGAGCAGTTCATCTTATAA  
GGCAGGGAAACAGGAAAACTATCCTTCAGATTCTTTTTTTTTTTTTTTTA  
ACAAGTACACTTTGGGAACATAAGGAAAACTAAGATATAATTTCTGCCTT  
AAGGATTAACATATTCTTGAAAAGGCAAAAAGTTTAGTATGTTATGGTGGT  
ACTTTAGGAAGAGCTCAAAAAATGAGTCCCTTAAATCCATGCAAGATAAGT  
GTATGTTGAAGAGGGGAGGTGTCTGGAGTACTTCCAGAATAGATAACATT  
TCAGTTGAATTTTGAAGGAAAAAGTAGAAGATAACTTAAAGTTGAAAAATA  
TTCTATGACTATTTTAGAAAAGATTTGTTAGTTTCAAGCATTAATCAAAT  
GATATTTAAATTCATCCATTCGTGAATTAAGTGATCTTACATGCCAATC  
CAAGTTAATGATTTAAAGATCTGACCTTATGTGTACCTTTGGTGGTGACA  
TAAAAATGGTGTGGTTACTATAGGACACAGCATGGCAATTCCTCAAAAAAA  
TTTTTTAAATAGAATTACTATATATGATCCAGCAATTCAACTTTTGGGGA  
TATACACAGAAGAATTGAAAGCAGGTACTCGGCTAGATGTTTGTACACCC  
ATGTTCTGTGGTAGCATCCGCAACAGCCAAAAGGTGGAAACAATTCAGTG  
TCCATCAATGTATTAGTAGATAAAAAAAGGTGTTGTCTATGTGACAATGG  
ATTATTTATTTGGCCTTAAAAAGGAAGTTAATTCTGACATCTGTTAGGACA  
TGAATAAAATTTGAAGACATTATACTAAATGAAATAAGCTGATCACAAT  
GGATGAATAAGATTTTATTCCACTTATATGAGGTTCTAGAGTAATCAAA  
TCCATAGAGACAGAAAGTGGAGTGGTGGCTACCAGGAGGTAGAGGAAGGG  
GAATGGAGTTAGTATATGATGGGTACAAAGTTTCAGTATTGCAAAAGGAA  
AACAGTTCTGTGGGTGTCAGTGATGGTACGTACCACAATATTCACCTTACT  
TGGGGCATCCAGGTGGCTCAGTTGGTTAAGTGTCTGACTCTTGGCTCAGG  
TCATGATCTCAGCGGTGTGGGATCAAGCCCCTCACTGGGCTCTGCATTGA  
ATGCAGAGTCTCCTTGTCTCTCTCCCTCTGCCCCCTCCTCTTCCCTCAAATA  
AATAAATAAATAAATAAATAAATGAATAAAATCTTAAAAATAAGAACATT  
CATGTACTTAATGGCACTGAAGTGTACATTTAAAAATGGTGAAGATGGTA  
AATTTTAGATGCATTTTACAAATTAACAAAAAAGCTTTTGAAAATACTTAT  
ATTTAAATATAAATAAATGATGTTTTTCTCTGAAAAGCTTTTGAGAATCT  
TTTTCTCGTTTCTTAGAATCAATAAATATTTGTTTACATTCATATGTATA  
CCTACATGTATATTATATATATATGTATATATAATGTATAATAATGTAT  
ATATAATACATGATTATGTATTGAGCATGTAATGATTATATATGATAATG  
AATATGTATATATGAAAGTTAAGGAGAACTATTCTACAAGATAATCTAC  
AGCTAAAATTTACAGTGATGATTTTTTTTACAGTGCTCATTTTCATATGT  
TTCTGTTTTTTCCACTTAGTTAACTTCCCCAACAGCACTGTTTGTAGAC  
AAGAAATTCATAGTTCCTAATGGCAATATTTTTTTTATAGTACTTTACTT  
TTACCTCCCTAAACCCAAAGTATTTTCAAGAGTATTTGAGAAGGAGAAAGG  
GATCATCTTTATGTCTATGTTCCACCTGGAGCTTCAGAGTCCAAGATAAT  
TGAGTTCAGTTATACCTTAATGGCACAAACCCTTGTTGCCATCCTAACAGA  
TTGTGTTTATCCTACATGGCCCAATAACTGTGCTAAGTACTTTGCATTCA  
TTACCTCATTTTTATCATAGAAGCCTCTTTTTTTATGTGTTCTAAGAAGTGT  
ATTTTATAAATATTATACAAGTGGGCCACCTGGGTGGCTCAGTGGTTGAG  
CGTCTGCCTTTGACGCAGGGTGTAATCCCAGGGTCTGAGATCAAGTCCT  
ACATTGCGCTTCTTGACAGGGAGCCTGCTTCTCCCTCTGCTTGTGTCTCTA  
CCTCTCTCTCTGTGCCTATCATGAATAAATAAATAAAATCTCTTTAAA  
AATATTATACACGTTTAATACTTTGAAGAAAATGTTAACTATATATATTT  
CCTCCCAAAGAGGAAAGTGGAACTAACTTCTCATTAGTCTGAAAGACC  
ACTCTAGGACTACATCATTCTATCTTTAGAGAAAAACAGCACTTAATAAG  
GTCAAAACTCCTTTTAAGGAAATTTATTATCATTATCTCAATTCAGATA

CTTTGGGACCTAATAGGAAAATCTGATTATGGTTGACAAAAGCAATTTAA  
AGAAAACACCTAGTATATTTTAAATTTTTTATGCAATGGATATCCTACCATA  
GTAATCTTAGCATATGTGAAATCTCTAGCCAGAGACAACAAAAAATTAT  
TGAAAAGCATCATGTCTATTTTAAGATTGGTGGGGCACCTGGGTGGCTCC  
ATGGTTGAGCATCTGCCTTTGGCTCAGGCAGCGGTCCCGGGGTCCTGGGA  
TTGAGTACCACATCGGGATTTCCGCAGGAAGCCTGCTTCTCCCTCTGTCT  
ATGTTTCTGCCTCTCTTTCTGTATCTTTCATGAATAAATAAATAAAATCT  
TAAAAAAAAGGATTGGTAATGTAAGGAATAAACCTTCAGTTATCCTTTG  
GAGGACTGCAATATTTCTATTGCTTATTGGCTACGCACACATGAAACAAT  
GTTGAATGTAATAACAAAGGAGAACTTGTTCCCTCAGTGGCTAGCTGGTTA  
TAATCAGATGAAATTACACTGTTTATTTTCAAGTAATCTAAGCAGACAAT  
GGAGAGAGGGGACAATGGACAAATTACATTGAGCGTTGAAATATTCTAGG  
TAAATACCTGTATCCTGGTGGCAAGAAGTGAAGTCTAATTTGCCTACTAA  
AATGGTGGGGAAAAAATAAAAAATAAAATGGTGGGAAATTTCTC  
ATTGACCAACTATGATGGCTTCGGACTTATGCAACAGATTCCAATTTAAA  
ACAATTGTGGTAATAAATGGGCAAATTAGCTTAAGGATTACAGCTTTACA  
ATAGCACAGCTTGCTGGCCTCAGCATTGAGCATTATTATTTTGAATCCCT  
TTAGAAGCTAAGTGTTTCAGGATTTGCTTCTTTAGCACAAACAACATCTCT  
GATTTGAAAATTATACTATTTTATCTTATAAGCATAACTGAATTTGAATG  
GAAGTTTTTGAATGAAGTTTCTGAGTAATGACAGGTATGTTTTTACTCAT  
TGTGGCAGAAGTGGCTCGTGACCCTAATTTATAGTGCAGAGTTGTTAGTG  
GGAGCAACTGTGCAGCCAAGAGCTATATTTTTCAGCTGCCCTTGCAATTA  
GGTAAAGTCAACTGACTATTTCTCACCAAAGAAATGAGAGCAAAAATGGT  
GTATGCCACTTTGGGAATGAAGTTGGTAAGAAGTGGGCATGCATTCTCTG  
TGTTCTCTTACTCTGTTTCGTAGCTGTATGTTGCTGCCCATGGTAATTTT  
GTAAGCCATACTTAGAAAATGGTAGAGACTCTCTCAATTTGTTTCCTTAA  
AAGGCTGGAGAAAGAGCCACTCCTCAAACCTAACCTACTCTCTACTGGT  
GATTAGACTTTACATGAGCCAGTATCAAGTTTCTCTTGCAATTATGACATT  
AAGCAACTAATAGTAACTTATTATTAATTAATATCAATTAATTATTATTA  
ATTAATATTAATAATATTAATTTGATGTTTTGTTTTAAGTAAGCTTTTT  
GCCCAACATGAGACTGGAACACAAACCCTGAGATCAAGAGTCCCATGCT  
CTACTGACAGTCAGCCAAATGCCCAACTAGCATTAAATTTAATTGACAATC  
TCAACCTTACATTTAATCAAAAGTCTGTTGATCCTATTTCTTTGATATAC  
ACTAAATCTGCCTCCCCCCCCCTTTTGTACTACTAGCATTTTAGTATAAG  
TCTCTATCATTTAAACTGAATAGAGATAAGGGTCTCCTATGAATTTCCC  
CACTCCCCACTCTTACTCTGGTGCCTTCTAAACATTGTACCCAGGGTGAC  
TTTTAAACTGAGAAGCAATTTATAACATTGCTTCATTCAAAGATCTTCA  
AAGGCTCTTATGATACTAAATTTATTTCTTTCAAAGCTTACAGCAGC  
CTAAAAATCTTTGAATGACTTGATCCAGCTTGCCGCTCTAGGCTGGACC  
ACACTTTCCCACCACTCCCCTGCCAGCAGGCTCTGTTTAGTCTCAGGGC  
TCTCTTGCTCAAATTGGCCCCACCTTTTCATTCTCAGAACTCGTAGTTT  
CCTTCTTTGGATGCTAGGCTCTTCTCCGAGTTGGCTCGTTTTTACCCTC  
CCTAGAAAAGCCTTCTATTAATTATTCTCTCTTTAGTTAGCCTCCCCCCC  
TACTCTCTATTATATCACTTTATTTGAGTCATTTATGGTTCTTTCCACAG  
TCTGTAGTTCTTACTCGCTGCCAATAATGTTTGGTCTCACTCATAAATTG  
TAAATTCCATGTGTGTGGGATATGTGCCAGGAGTTGACACAGAGCCTGC  
ACATAAACAGATGGCCAATACAAATATTTTAAAGAATTGTTGAATGATTA  
TTAGTTTGATTCTGTATGAAGAAGACACTGATTCTAATCACTGATATACT  
TATTAAGAACTATGAAATGGTCATAAATCTCTTTACTGAGTCTTTAGAAT  
CCCGCATCTCAGGATTGGTTGAAATCATAAAGATTATTTTGTCTAACCAC  
ATTTAGATTTCTTTTATAATCTTTTTTTTTTTTTTTTTTAAAGGACACAT  
CCTTGGTCTCATGAGCATAGCATGTCAGCCTATTTTATGATAAACATAAC  
AACTACAGAATGAGTCCCAGCAACACTTAACCACCATTTGGCTCACCCCT  
CAGCAGACCTGGATACTTCCATGGCAGATTGTTATACATCTCTGAGAAG  
TAAAGAGTAAAGACTAATTATTTTCATCTAATGACGACAAAGTCATGACTA  
GTTAGTTATACACACACACACACACACACACACAGAGCTTCGCTGT  
ATTTTAAATGAAACAGTATTAATGACCAGAACCATATATTA AAAAGAA  
ATGAATGATCAATCTTACTATAAGAATCATAATATGGTCCCTTTTCTCCA

TCCAGCTATACACTGCAATGTATTTGAAAAACCCAAGGAGGGGATCCCTG  
GGTGGCTCAGCGGCTTAGCGCCTACCTTGGCCCAGGGTGTGATCCTAGGG  
TCCCAGGATCGAGTCCCATCCAGCTCCCTGCATGGAACCTGCTTCTTC  
CCCCCTCTGCCTGTGTCTCTGCCTCTCTCTCTCTCTCACTCTCTCTGTGTG  
TGTGTGTGTCTCTCTCATGAATAAATGAAAAAATCTTTTTTTTATGT  
ATTATGAATTTGTTTTTTTTTAATTTATTTTTTATTGGTGTTCATTTAC  
TAACATACAGAATAACACCCAGTGCCCGTCACCCATTCACTCCCACCCCC  
CGCCCTCCTCCCCTTCTACCACCCCTAGTTCGTTTCCCAGAGTTAGCAGT  
CTTTACGTTCTGTCTCCCTTTCTGATATTTCCCACACATTTCTTCTCCCT  
TCCCTTATATTCCCTTTTACTATTATTTATATTCCCCAAATGAATGAGAA  
CATATAAAGTTTGTCTTCTCCGACTGACTTACTTCACTCAGCATAATAC  
CCTCCAGTTCCATCCACGTTGAAGCAAATGGTGGGTATTTGTCATTTCTA  
ATAGCTGAGTAATATTCCATTGTATACATAAACCACATCTTCTTCATCCA  
TTCATCTTTTCGTTGGACACCGAGGCTCCTTCCACAGTTTGGCTATCGTGG  
CCATTGCTGCTATAAACATCGGGGTGCAGGTGTCCCGGCGTTTCATTGCA  
TTTGTATCTTTGGGGTAAATCCCCAACAGTGCAATTGCTGGGTGCTAGGG  
CAGGTATATTTTTAACTGTTTGAAGAACCTCCACACAGTTTTCAGAGTG  
GCTGCACCAGTTCACATTCCCACCAACAGTGTAAGAGGGTTCCCTTTTCT  
CCGCATCCTCTCCAACATTTGTTGTTTCCTGCCTTGTTAATTTTCCTCAT  
TCTCACTGGTGTGAGGTGGTATCTCATTGTAGTTTTGATTTGTATTTCCC  
TGATGGCAAGTGATGCAGAACATTTTCTCATATGCATGTTGGCCATGTCT  
ATGTCTTCCTCTGTGAGATTTCTGTTTCATGTCTTTTGCCCATTTTCATGAT  
CGGATTGTTTGTTTCTTTGGTGTGAGTTTCTTAAAAAAAAAAAAAAAAAGAA  
AAACCTGGGTACTCTACTAATGAAGCCTCTTCAATCATCACTTTGAGAAA  
CATCACACTCATTTACCGTTCTTTAAAAAATCTCAGCAGCCGTAATCCAA  
AGTTTACCTAAACCCTCTTTTTTGGGATGCCTGGGCAGCTCAGTGGTTGA  
GCATTTGCCTTGGGTTCAGGTCATGATCCTGGGGCTCTGGGATCGAATCC  
CACGTCGGGCTCCCCACAGGGAGCCTGCTTCTCCCTCTGCCTGTGTCTCT  
GCCTCTCTCTGTGTCTCTCATGAATAAATAAATAAAAACTTTTTAAAAAT  
TTAAAAAACCCCTCTTTTTTGAAGGATGCAAAATGTCCTCTATAAGGTAA  
AGAATTGATGGTGACCACCGGAAAAAAATTGATTTTTTCCCTTTCCCTC  
AAGACTTCCTTAATTGAGAAGCATACATTCATGATCACTTCTGTTTGGT  
TTCCCCAAAAAACAAGATCTACATCCTACCCATTAAAGAGGGTAATGAC  
TTAATGAAAACCTACTTCTAGGCTCTGTGGGTCTGGTATGTGGAGGGAA  
GGGAGGCTATCTGCAATTTTGCTATGGATTCAAATAATCTACTATATATA  
TATATAGTGACAGGACAACTCTCATTATAAACTGCTAGCCTACAAAACC  
AGGAGAAAACCTGTCAAATAAACCTTAACCTCTGACCATGGTAGAAGAC  
CTACTACGGGGTATTAACAGAGTCAGGCCTGTCAATCACAGCCTGGTCTC  
AATGTTTGTGTTATGAATTCCAACCTGGTGGCATGAACTTGGGGGAAAA  
AACCATCGTAAGCTGAGCGAGTCCAAAAACTACAAACCTGGAGCGAAATA  
TATTTGGGGCTGAAATGACGTTACCGATGTCTGAGATGGGTTTTCTTTCT  
TCCCTCCTCCCCTCCCCTTCCCTTTTGAAAGGCGATGCTTTTATTAGAT  
TATTTCTATAGCCAAAAGACACAGCTACTGTCTGGCTGAATTTGCTGGTT  
TTCTCTTGAATTAATAAATAAATAAAGAGAAAAGGCTAACTCTTTTAA  
CAAGACAAATCGGCATAGTTTCTTCTTTCTTTTTCCTGCCAACTGAAC  
ATGTTTATACGTTTCAGATAGGACTCTGGGCCACATAATATATGACATGT  
ACCTACTTGTATGTGCGCATACCTACGTGACAAGATGGGCTTCTTACCAT  
AAGTTTACCTGTGGGTGCGCAGGTGAGTGGGAAATAGCGCTTTGCTACA  
TGAGTTAACAGCCTGCTGGGCTTGACCAAGAGCTGTTTCATTGTCATCTC  
TGCTGTACACAGACTCCTACCCACCTTGGTCATTCTGCTGCTTCATCAT  
TTTCCTTCCCAATCCTTGAAAACACTGCCATCTCCTCTGAGTGCTCAATG  
AGAGTTTAGGTAACATTACTCATTTCTTTTACTTGACAGATAAAAAAGTG  
AGGGCTTGAAAAATCAAATTGCCATCACATCGTCCAAGCCATGCGACTTA  
TGAATGGCCAACCTCGTGCTAGGAACTCTGAATTTAGGTACCGCACATTC  
TGTGTCAAGGGGACTACCAGCACTTTCCTGACCCAGCCACGGAGTCAACT  
CAAGGTCACCTCACTTGTGTTATCAAAAGAAAACAGGAAGGAAAGACACT  
TCACATGCAGGACTGAAGCTCCTCACAGGAAATGCAGATTCTTGTGGAGG  
GAAGGGGGGGGTGGAAGGTGGGCAGCCCCAACAGCTCACCTACCATCTCT

ACCCTTGTCTTTGCTAGTTTCTCGAGACTTCTTGAAACTTGCCTTTTGTG  
T TAGTATCAGTCTCTCTCCTTTGCATTGATTCCCGCATTCGCCAGAATCC  
ATGGGTCCTCGACTTTCCATCACAGAAAAGGAATTATGCCTTGGATTTTG  
TTTTGTCCCGCATCACGTTTTATTCTTTGTGTGAAGAACAGCTAGCACTT  
TGGGCCTACCATGTGTCAAGTGATCCAACAGACACCTGACATCACTTTTG  
CCTCATCTTTTAACATTTGTCTCTGTGATCAGGTGACTGCCCCCTGCAGAA  
CCAAAAAGCAAACCTGTGTTTCATCGATCCTAAAGTATGTTCTCTCTTCA  
TTAAGCTCTGCTCTTTCTGTGTCTTTTTGTATTTGAAAGTGCTGTTCTT  
CCCAAAGCAGAACTGATGTTGCTAGTCCCTTCCAGTTATACACGGTCATC  
TAACTGTGGGATGTGTTGGCGTTCATTAGCATTAATCTGCTTTCTCTTC  
TGACCAAGGAGATTGATCTATGCAGGTTCAAGGTGCCCTGTGGGTCCCA  
AATGGGTGATTTCTCTGAGGAAAATAAATAATTCTCTAAAGAGATTAGTG  
AAGGCAGACAGTGATCTGAAGGCAGATCAGTGATCTTCCATAGATTTTAA  
GGGTTTTGTTATGGGCATTACCCCAAAGGTCCCCAAAAAGTCTTTCAAGC  
ACATAGTTGCTTTACAGGTAAGACTGATATAAAAATTTAATAGGAATGATC  
ATGTTGAATTGGGACTTGTCTGGAATGAGGAAAAGGACTTATCATGAATT  
CAATGTCTTACCCCGTCTCAGCTCTTCTGTTTCTGGGCAATATAGTGATA  
TGATTCTCTCTGTGTGGAAACAGCACTCACGGTGGATTCTATTATAACTA  
GAGGCATACGTGGTGCATAGATTTAATTTGAGTCAGACCACAAAGCAAAA  
CCTAAAGCAACAATCATTTGCCAACCTCAATCCCTTGAGGGGCTGTAGA  
TGACTAACACTGTTTTGCTATAGTCTGGGAGAGAATGGGGCTATCCTTCT  
CAATAATCCACATCGTAGACCAAAAGTCTTGAAGGAGATTTTCTTTCTTC  
CTCCCTCCCTCTCTCCCTCCCTCTAACGGTCTCAAAGACTGCTCCATGTT  
GCTACATTTCATCAGTATTTATTTTTGCTGCTGAGTAGTATTCTATTGTAT  
GAATATGTCATTCTTTTATTGATGTTGAATCATCTGGAATGTTTCCAGGT  
TTTAGCTTGTATGAGTAAAGCTGCATATTAACATTCTGGAACAAGTGCTT  
TGTGGACATCATACCTAGGAATCAAGATGTTGGATCATGGGGTAGATATA  
TGAATAACTTCATTTTTAAGAATACCTAGCAGTTCTACACAGTTAATCAA  
TCCTTAGTCATATCAGGAGGCATAGAATAGTATTGTGTGTGTTCAATTTG  
CATGCCCCGTGNNNNNNNNNGGGGGCAAAGTTTTATTGGGGCCGGCCCA  
AAAAGCAAACCTTAAGGCAACATTTTTTTGCCACCCCTAATTCCTTGGG  
GGGCGGAAGAGGACAACCCCTTTTTTCTTATATTGGGGAAAAAAGGGGG  
TTACCCTTTGAAAAACCCCTTGGGGGCCCAAAATTTTGAGGGGGTTT  
TTTTTTTTTCTTCCCTCCTTTTTTCCCTCCCTCCCTCCCTCCTTGGGGGG  
CTCCCTCTTTTTTCCTTTTCCCCCCCCCCCCCCCCCGTCTCTCTCACA  
CACCCATACACACACACACACACACACACACACATTAATCAACATA  
TTCCAGTTGGCTCAAGGCTTTTCTGAATTACATGTTTATTTTGTCTTCTT  
GACTGATATTTCTCATGTCTGAGTATTGTGCCTCTAGGAAGGAAACTT  
ATATTTTTTTAAAGGAGAGCTTTTCTAAAAATCTTGCCAAAAATAAAGTG  
GCTAAAAAGGACAGCACATAAAGCTCTTCTCTGAAAGCGAGAATAATTC  
TGAGGAATTTTACTTATAACAATCACTACTTTCCAACACATTTTTTTGAAG  
GAGCAGGAAGGCCTTAATTTGAGTAAGATCAGAGAAGACAAATGATAGCG  
CCCAGGGAATGTGGGGTCACGGTGGAGGCTTAGGGCTACTGGACATAGAG  
ACATAATCCCTCTATTTCGTCTTTTTTTCATCAGTTTCTCACACTTGTAGCA  
ATTTGGAATGTGAATTATGAATAATCATTTTCAGATGACTGTCTGCTCACA  
GACTCGTCTCCTGCGCCCACTTCCCTTCTTTTCAGCCATGCAGGGGGTACA  
GATTAAATGCACCACACTCTGATTTCTATTGTCTGCATGGCTCACTTGCC  
CAGTAGGCCTGACACTGGTACCCTCCTTCTGATCAGGTGATCTGCTGC  
TTTCATCTCCTAGATGGGATCCTCTCATTTTTCCCCCAAGTAGAATACACT  
CCATCTGCCCTTGAACACATCCTGATTCTAGTCTGTGATGAGATAAAGT  
GATTTGCCTATAGATCTGTCTGCTTTACTAAGTGAGTAAGTTGAGACGA  
AGATCTTTTCTTACTTAATCATATCTTGACCACCAAGCACCATGCCTGGC  
AGATGGAAGGTGCTCAGTGAACACCAGGGATGTGTCCAGTGAGTTCCATG  
ATCCGAAACTTGTCTTGCATCAAACAATACATACATGGCCCTAGAACCCTT  
TGGCTGGCAGTTTCAAGCAACAGTCACTTTCTACAGACCTTTTCAGAATT  
TCTCTCTTCTCTACTAAATTGAAAAGTCTTTGAATTATAGAAAATTTCT  
GCGGCACCTGTGTGTGGCTCAGTCAATTAAGTGTCTGACTTATGATTTTCG  
GATCAGGTCATGATCTCAGGGTTGGGAGATCCAGTCCCTGCTTCAGGCTCT

[illegible]

AATAAGAGAGGTAGCTCTCCAGATCTATTTCGGCATGGGTCAAATCACACC  
ATTCTTGTTTTCAAACCTCCCTCTCAGACAGAACACATTCCCAGAGAGAGA  
GAGAGAGAGAGAGAGAGAGCAACCACTGAGTTCCTTCGAGTAATGAGACA  
AAGGTGATACTCAGCCTACAGAAGCCAAGAGCAGTGAAGCTTCGATAGCA  
GATGAGAGTTTGGATCTGCTGTTATGTATGAGACACATTAGGTTGGTTGG  
TTTTCCATGGTTATCCACAGCACAGGAAAACCTGTAGGCTGAAAGTAGCTT  
AAGATAGTAGAAGATTTTCTGAAAGATAGAATGAAGTCTTCTAGTTTAAA  
ACAAAAAGGGAAACAGTAAAATAAAACAAAAAGGGAAACATCTCTGACTA  
TTCTAACTAAAGACTCTTCAAGCACCAGTTATAATACAAATCGATGTATC  
TGTTAGCAGGACCTGGAAGCATCGGGTAGGAAGTTGAGCTAAATAGAAAG  
CATAGGTATTCTTTACTGAGAACATAGCTTGTGTGAGCTCTTGCGGTCAC  
AACGCATGTTATCATTGTTACTTTTCAGAAGAATTCCACCAAGTTGGTGTT  
ATTAATCTTATACCGCAGATGAGAAAACAGAAGGTCAAGAGCACTATAGG  
ACTTTCACATTTCTGGTGAAAATCTGAGCAGAGGACAAAACCATTTCTAAA  
TCCTGATGCCTACAAAGTCTGTATTTTACCCCGATATTCTTTGATGCTAA  
CAAAATCTGACCCCTGAACAGTATCTTTTCCACCAATTAAGATATTTTTTA  
AAAAATTTCCACCCCTCTTATACTATGTCTAAAACCTGTCCATATTGTCTC  
AGATGTGCTAACGAGCTATGTTTAACTTCTGAAAAATCATGGCATGTGC  
CTATTCTTACCTCCCTCCTCACTCCAGCCACCTGTTTTCTCAGATTGTC  
TTTCTTGCTGCTTCTCTACCAACCACACTTTGTGAATCTGGCTTATCTCC  
TTCTGACCGATCATTTTGTTTTCAACTCAGGAATTGTCTTCTCTCTCCAC  
CTTAAGTATACTTGATTTGCTATTTCTGTTAATACTTCTTTTCTCCTTG  
ACTTTGAGACCATCTCTTGTGAAATGTTTCTCGGGACCAGCCCTCTTCTG  
ACTCAAACCTTGAAGAACTGCAGAAAGCAGAAAATAATATTTGCGACCTC  
TGAAATTTCTATTGTTATAATTGCCCATATACAAGCAAGCAGCAAATTGCA  
GAGTCTCTTATATGATGTTTCCAGTTCTCTCATTTGCTCTCGGTACATAT  
CCTCCCTCATAAAAAAGAAGTATAAATTCCTTAGAGAAAGGGTTATATG  
TGCAGACATACCTATTACTCAAAAATGGAGCTTACGATGAAATTTAAAAA  
GACATTTTTTTTAAATTTATTTATTTCAATCAAGGCTCATATTGGATGCAAAA  
AGCCTCCCGTGTTTTTTTTGTGATCTGAAATTTGATGGAAGTACCCAGTT  
GATTTTGATCACTCCTAAATCAAAGCCAGTGTAGATTTATATTTACATGA  
CTGATTATATTAAAGGAAGGGGCTAACTCGAGATTTTCTTATAGTGAAAA  
CCAGATTTGTCTCTAATTGGGAAAGTCTTCTTTTCTTAAGCCCTTTATTA  
CCCCCAAATCAGCAAACATGCAGTAGAATTGAAAAAAAAAAAAAAAAAAAA  
AGACAATACAGAAAATTGCCAAGTATTCAGGATTAGGAAAAAAAAAAAAAAAA  
ACAGGCACAATTTATTGAGAATTTATTACGTGCTAGAGTCTAACCACCCA  
TTTCATGTATCTTTAAGGATCAGTTTTCTAGCACATCTGTGCGAACCGTC  
ATTCAGCATACATGAGTCCAAAGTGTTAACGCGAAGAAAAAACCTCCC  
ACCTTTTAGCTTTTGTTTTGTTTTTGTTTTTTTTTTTTTTTTGCTTACAA  
TGTTACATCATGTTTTCCCTGTAGATTTACAAGCACATATTCAAACCTGGA  
ACCTATTTTTTCTAATGGAATCTTGCTTTTTTTTTTTTTTTTGGCCAGTC  
TATTGAGATCCCTATAAGAGTACAAATAGTACAAGTGCATGCACACAAAT  
ACACAGTGAATAATAAACTAAGTATTTTTTAATATTTGTGTTTTTCTCAC  
AGTGTAAGATGGGGCAAAGGAATTATTACATTTTTTGAAATTTCAATTCAT  
CTTAGAAGGCTTTTTCTTAAATCTGAGGAAGGTGCCTCTGTCACTTGGT  
TACACACCATCTGCAGCTCACACAGGCTGAAAGTCAACGTGGAGAGAACT  
GCTGTATAAGAGCCATCACACGTTTACCCTTGACTTCAGATCGCCTACAT  
GCTCTTGAAC TAGAAATATTGCTGAGGGTTTGCCAAACACGCAAAGGCCA  
TGGCTTTTACCATTTTTGCAAGCAAAGGAAACAGCATTTGAACCTCTTCTG  
AAAACTTTTTTTTTTTACATTTAAGAGGCGCCACACGAACGAACTGCCA  
TAAATAACGTGTGCTAACATTTTCCAAAACTGGACATCAATTAATGCTA  
ATTTATGAGGAACTTCTTTTGAAGAGCATAGTCCAGACTCATAACTACT  
GAAAAGACTCATTAATATAAATGTTAAGGGAGTTTCTTTTTTTTAAAGGGA  
GGGCATTAAGGTAAATGCATATCATTACATTGAAAGCTCATAATTTATTG  
AAAATTCAGTGGAAGGAACTTTTACACTATATGTTTCCAAAGGTAATGT  
TTTAGCACATTAATCAAGAAAAATAAGTAAGGTTGAGGATGTGACCTTAA  
GAAAGACATGCAGTGAAAATCCAGCTTAATGATACCTAACGTTTATTGAC  
TAAGTACTACATGCATCGTTATGTATATGCTATCTTGTTTATTTTCTCCA

AACAATATTATGGTGTAGATAATATTATTATTGCCACTTTGCAACTGAGA  
AATCTGAAAATCAAGCAGCTTAAGTCATGTGCTGTAAGTCACAAAGCTAA  
CAACTGGTGAAGCTCGGATTCAGAACCCCATTTCTTAAACCACATGCAAT  
ACTACATTTTCTGCTGTTGAGAATTGTCAGCATGTATGGACAAATTTAG  
GTAACCTTATGTAATGCTTTATTCTCCAGGATCTCTCATAATCAAATCGT  
TTTTTCATGAGTTAACATATACATTTGAAACACACACAAATTAATTTGA  
TTATGGTTGTCTTAAGTAATTTCTTTGTTGAAATAAAAGTGAAAAAATTT  
ACATTTATTTGGTTCCTTTAGGGATCGTGTGTGTGTGTGTCTGTGTGTAT  
GTGTGTGTGTGTCCGTGCGTATGCAGATGTGAGGATATTTTGGTAGAGAA  
AAGACGGCACATTGAGGAGAATGAGAGAAAGCAAGAATATATTACCCACA  
ATCTTAAGATCGACTAGTTAATGACTAATAGATGCCTATCTATTGCCTAA  
TAAATGATAGATTTCTGGTAGATGTACATATTTCTCCTACAACCTGCAAT  
CAACCTTGTAATTGGGCAAGATTCTAGCGACACATGGATGTTTCATCATC  
TTAGTAGACAGTAAATATATAGATCCTTCTAGAACAATAGTTCTCAAAC  
TTGATCATCCTTCAGAATCATCTGAAAGGTTTGCTAAACACAGGCTCCCA  
GGCTCTTGTTTCTACTTTTATAGGTCTAGAGTGGGGCCTGTGAATTTGCA  
CTTCTGACAAGTTCCGGAGACATGCTGTTGTGCTATTCTAGGAACCCAC  
TTTGAGATTCCTCCGATAGAGCAGGCACTCTTAATGGAATATACGTAAA  
CCCATAATGTACTTTAGTGATAGTTGTAAAACCTGTTCAATGAATAGTGTA  
GTTTGTGTTAGATCAATGAATAAAACATATATTAAGTAGTTACTAACAG  
ATTTATAAATAATTGTCATATTCAGTTCACAGAACAACTAAAAGATTAA  
TATCCAATAATAATTTGCTATGATTACTGAATAACTTCAGACTTTCTAAG  
TCATTTTGTAGCTACTAGCAATCTACTCAGGCATTTGATGTAACCTTTGGG  
CTAAAAAATAAGAAAAGAAAAAGAAAAAATAAGAAAAGATGAACTCT  
GAGCCACTCCTTTCTGAATTCCTCATAGGAACTGCAAAGCTTTCAACTTG  
TATAAATTGAAGAGGGAACCTCATTCAAATGGACCACACTCAGCATAGA  
ATTAAAGGAGTTATACTTGTFTTTTTTTAAGATTTTATTTATTTGAGAGA  
GAGAGAGAGAGCGAGAGAGCCAGAGAACACAAGCAGGGGGGAGCAGCAGA  
GGGAGGCGGAGAAGCGGGCTCTATCCTGAGCAGGGAGTCTAATGTGGGAC  
TCTATCCCAGGATCCTGGGATCATGATCTGAGCTGAAGGCAGACGCTTAA  
CAGACTGAGCGACCCAGGCACCCCAAAGGAGTCATATTTGGATGATTAAA  
TATTTAGAGCTTATCAATGAAAAGATAATGATATGATGCCAGGATAAACA  
AAGAGAATTCACCAAGGAAATAAGAGGAAAAATTAAGGATAAAGTTAAGC  
AGAATAAAAGATATCATTTGAAATTGTGAAAGTACAAATCCTGTCTATGT  
TTTCTCAATAATTTGCTTTAAGAAAAAGCTTTCCCCGTGAATTTATTCAT  
GGGTAGACAGTTGGTAAAGGTGAGTATGAAATACTTCCAAAGTTTATCTA  
ACATTAGTTTCCTAAAAAACAACAGACAAACAACAACAACAAACTCCC  
ACCATATCCGTGTTCTCTGATTCTTTGGGAAACATTTGTGTATCAGTCATA  
TAAAGTCCTCTGTAACCTGAATGAAGGAGTATGAGTTTAACATGCAAAATT  
CACTACATGAAACTGTGTGAAATGTTTCAATTATTTCTATAATAACATTT  
AACATGTTCCAGATACAGTGCATTAAGCACACAGCCAAGAAACGTTCCAA  
GCCTATGCTGTTTTTTCATTTGGGTGTATTATAAGTGTATGAAACACATGT  
TAGGAATATATTTTCATATTCTGCATTTGTAAAATATCAAATTTATATCAG  
CAGAAACCACAAGGCAGCACAGGAGCTGCCCCAGAGCAAGGCCATTTTG  
CAATCAAACCTTTTAACACCACATTATCATTTTAAAGAACAAATCTCCTGG  
TTGAAATGAAGAAAATGATTTTCACAACTCATGGAAATTTTCTTTATGTA  
TTTATTACAGGATTCAAAACACATACTCAACAAGAATTAGTCTCAAGT  
TTCTATTTTGTGTAATATGTACCATGCTCAAATGCATACTACAAATAAA  
ATTAATTCATCTTGTTTATCTTATTCATTCTACAGGAGAGATATAATTT  
TGTGAGATTGCTGAAGTTTATACCGTGGTTCTTCAGATTATTCTATGCTA  
AAAAAAGCTATCAAAATTATTCTTCTCACAAGCTAAATAAATTTATTTAC  
AAACATCACCTTTTCGTATTTGATCTTAAGAGCCAGATGAAACATTGATAA  
TTTTTTCTGAGAAATTTACTTATGCCACAGAATTTACCTTGCAATCCCTAA  
ATATTAAGCTTCCTCCACATCTTATTTTATAATTATAGATGATAGTAT  
GTTAACAGTTATATTTTATTTTAAATTATAGATCACATGGATTTGGGTCAG  
ACCAGCACGATTTGTTTTATATTGAATTATTTTCTAATATAAGTACTTTT  
GTGTCTGGTTCCACTATCATTTATGGTCACGTTTACAAATCCTAAATTACA  
TACTCACTTCCTGGACCTGGAAGATCCTGGCCAGTTTAGGATACATTTGA

GATAAGCTGATTTCAAAATAGTGCCTAAAATATCAGGGTAAAGCTCAGCC  
TACACTGGTTTCAGTGTACAACCTCTCTACAGTCATGGATCTTACCATGGAA  
TTTTTCCCACAATAAGAGAACTATTTGATCAGTGTGCCTCTGTGGCTCC  
TACACCGAGTAAGCAAGTTACTTAATTTCTCTTTCCCTCAGTTTTCTCATT  
GGGCAAATAGGGAGAGGAATAATACCCACCTCATCAATTCTTTGTGAGGA  
CTTACTAAGTTAAAACCTGTAATGTACTGAAAAAAATAGCTTATTGAAC  
ATAGCAAACACGACAGAGGTGTAGGTAATATTATTGGTCCCTGGTAACAC  
TGTGTTCTCAGTACCTGCCTAAAAGGAACATGCATTTAATAAATAAAGAG  
CAAATTAATAAATAAAATAATGAAGTCCTTTTTTGGATTCCACCACAGGCT  
TTGGTTTGGACCTCTCTAATAAGATATACTATATTTTTGTATTGCATGAAA  
ATGTTTGTCTCAGGTTACATTCTCTCCTGCATTTCTTGTTAGGCAAAGAGT  
GTATCCTGTTTCATATTTGTAGCGCTGCAGTGACAAGGAACACAGGATATA  
TCTGTTATGAGCATGTGTGGAATGAATTAACAACAACAGACGAGCCAAA  
GAAATGTGAGAGACTTTACCTCTCAATCATTAATTTTTTAAATTTATTTTT  
ATTCCATATTTCTAGAGCAACTGGTCTGTGGATGACATTTTGCCGCATGT  
GATACAAAAATGCATCAGAGTCCCTTACTTCAAGAAAAATTATAAATGAAT  
AGGGAAGGCAAATAACACACAATGCTTATACATGAGTAATAGCTGACTC  
ACAATAGAGTATTATACGAAATGCTGAGAAATTCCACTGGAAGAAGACAT  
CGTTCCCAGCATCGCAGAGCGCCAGAAAGGCATCACGAAATTGTACCAAG  
TTATCTCTCTCTAGAGCAGCCTGAGAGCAAACAAGGGCATTCTCTCTTT  
TCCCCACTGGACTGGTTCAATTGACATTTGTTTTGTTTTATTATGAATTA  
AATTTGCGGCTATTTCTACCCAGACTCACTAAACCACCTGTGAATTCAT  
CAAAGTGGTGAAGTGGATTAAACAATAATTCATGGGCTTTTTTGGATTCTT  
GTAGCCATAGCTTGATATTAATATCTGTTTGTGTTGACTTTGGGGCTATAT  
ATTAGGAAGCCAAGGAATTAGCGAAGCTGCTTAAACTCATCAGTACATTA  
GTATTTAATAAAGTGTTCCCAGCTATCAGTAAGCAGGGCTCTGTGCTCCC  
CAGCAAACACTAACCACAGGGAAAGCATATTTGATGAAGAGCCAGGAGCA  
ACTATAACCAAACCTTGATCATTTGCAGTGTCTGATCGGTTAAAATAGCT  
AATCAGGCAAGCTTGTGTAGACCCAGCATTGGCTACCATGACCCACTTTG  
AGCATGTGTGTGTGTGTGTGTGTGTGTGTGTGTGTGTGTGTGTGTGTGT  
CTTTTTACTTTGGTAGAAATGGCTTGACCCAAATGTGAATGGGCCTGGCA  
AGATGTGTTATATTTACAAAATTTCTAATCAGAGTGGAGGATCCAGGAGG  
CTAATGCCAACCCCGGGCCTGAGGCATCCTGCAATTAACATTGTCAAGTG  
TTCCCTGCCTGTAAACAGTTACCTCACGTTACCTCAGAGCATGAGGCCAT  
GTTTGACATGAGAGCCGGCAGCCACAGTATGGCTTAGCTAAAATTCTGA  
CTTCTGGAAGTCATTTTCTACCACGTGCACGTTTCAATAAATCTGCAAAA  
TAACTTAACCAAAGAGACCCTGGGTGATTTTTCTTTCTTTTTTTTTTTGT  
TTCCCCCTCCCCACCCCTGCCCAACAAAGCTGTAAACTAAGTCCCCCTTT  
ATCGCAAAAGTCTCCACTGTGTAATCCAATGGGCTTTCAGGGTTTGCTTT  
CACACATGTTTGTCTCTTCTGCGCCACTAAATTGTATCAGCTGCTCTGG  
ATTTGGGTTTGATGGTGATTGCTGAGGTGGGAGAGGCAGTGGCTGTATTT  
GTTGGCTACTTTTTTTCACAAAATGTACCAGTTGGGGAGTACAGTTGGGG  
GCATTCATGGAATTTACTAGATATATAGGTTATTTCATTAGCTTTTTAAT  
TTGGTCTTTGGTCAAGATAAGATAAAAACCTTGAGATCTAGACTCTCTTA  
TACTTTCTGTTTCACACCACATTATATATAATAATATGGCATTATAAAAA  
ATAATATTATGGCATTATATATATCCATTATATTGATCTACATATGCATAA  
CCATACCGACCCTATTAATATATAAATTGAATATATATATGACTATAACA  
CTATATATAGTAACGATGCATATGTTTCTTTTAAATTTTTTTAAATGTTT  
TGTTTTAAAGGAGAGTGTTGATTTTTTTTAAAGATTTATTTATTTATTTA  
TTCATTATCAGAGACTCACAGAGAGAGGCAGAGACACAGGCAGAGGGAG  
AAGCAGGCTCCATGCAGGGAGCCCGACATGGGACCTGATCCCAGGACTCC  
AGAATCATGACCTGAGCCAAAGGCAGATGCTCAACTGCTGAGCCACCCAG  
GGATCCCCCTATATTATTTATTTTTTAAAGAGATTTTATTTATTTGTTTGAG  
ACAGAGAGAGAGAACACTAACAGAGGGAGAGGAAGAGTGAGAAGCAGATT  
CCCCACTGAGCAGGGAGCCCGATGTGGGACTTGATCCCATGACCCTGGAA  
TTATGACCTGAGCCAAAGGCAGACAATTAACCGACTGAACCACCCAGGTG  
TCCTTATAAGACATTATTTCTAATAATAAATTACTGAGTAGTTATGTGG  
GCAATGCATACAGTGTCTGTCTAAACTAAACAGTTTGTGTGTTTCATGTTTT

TTGATAAATGTAAATCTCCTAAAGTCAAATAAATGTTTTGCACATATTTA  
TGTGTGGATGTGCTTGTGCTACTTTTAATAGAACCAAAACATGAGATAAT  
ATGGCCAACCCAGAGTCTTAAATGGATTTATTAGGAAGAATGACTATTCA  
GTCGTAACAAAAAGCTTTGATTTCACTTTCCCAAAATGAACCTTCCCCTT  
CCATGAGCCTTCTTTAGCATGTGCAGTCTAAGTTAGAGCTATCAGTCTTG  
AGGAACCTAGATTTTAATCCTAGCCATATGGCTAAGCCACTGGGTGACTG  
GACAAGTCACTGCATCTTTTGGGGTCTTGTTATCATTCAATAAACTGGAG  
AATAACATACTTGTATTACTTCCTCATGAATTTTTTTTTTGGCCTGGTTA  
AACAAAATAACACATGTGCTACATTTTGAAAACGTTAGTAGTATCATTCC  
TAAAAAATAAAGATACTGCTAACATTATAGGAATTACAATGTAGTGATCA  
TGGTTATTTTCCTTTTTATGTTTTTCTTGGTTTTTCTTCTCTTTTTCA  
CATCTTTACTAATATTTCTGACCATTCCCTGCCCTTTCTATAAGCAAATAT  
CTACATGGTTTTCTGCAATAAGTTGGATAATAAATATTTGGGGCTTTGTA  
AGCTCACGATCTCCATTGCACACACTCAATTCTGTCAATTACGGCATGAAA  
GCAGTCACAGGTAATTATAAGCAAATGGGCATGGCTGTGTTCTATTAATA  
CCCTGTGAACGATGAAACTTTAATTTTCATGTAATTTTTTACATGTTCTGAT  
ATAGCATTTCATCTTTGGATTTTTTTTTTCCAACACTTAAAAACAGAGAGAAT  
ATCGTTCCTTAACTTTTTGGTCCTACGAAACAGGTTGTCTGGGACAGATTCC  
TCCTGGGGGCCATAGTTTGTGCTGACTCGTGCTCCATGCAGAGAGCTAACCT  
CAGTACCATGTTCCAGATGAAAAGGGCAGTTCTTGGCTTACAGGAAGGGG  
TACTAGTAGTTGGAGGTCACCTCAAATCCAGGTTTCACCTCCAGCTTAAA  
TTCCAGGGAGAGAAAAAATAATCCAGGGAGAAAAACAAAATAAGTGTTT  
TAAAAATATAATCTGGGCACCTGGGTGGCTCAGTCGGTTCAGCATCTACC  
TTCAGCTCAGGTTGTGATCCTGGGGTCTGGGATCAAGTCCCGCATTGAG  
CTCCCCCTCAGGGATCCTGCTTCTCCCTCTGCCTGTTTGTGTGTGTGTG  
TGTGTGTGTGTGTGTGTGTGTGTGTGTGTGTGTGTGTGTGTGTGTGTG  
TTTTAAAAAATGTATATATATTAATTTTTTGATATTGATATAAAATCAATA  
TCATATATAAATTTTGATATTGATATAAAAAATCAATAATGTATACTTCTT  
TCAGACCACTTATCTTCAGACAGAAGGTCAAAGTGCTGATTTTTTAATTCT  
TTTACATTTCAGCTCACTGTAACGGGCCAACACTTCATCAGTGATGTTACA  
ATGTTTTTAAAGTGAAAACGTAAGCTAGAAATCACTTTAAATCCTCTCTTT  
CTATGGAGGAGGGAAGTCCATCCTACTGAAGTAGAATAACTTGCTCAAA  
ATCAGTACAGGTTGAACTAGAACTCATATGTTCCAAGAGGGGGGCTCTT  
TTCACGTCATGATTATGTTTTACTCTAATTGCTCCTGGAAGCTCATCCCA  
AGCAAAAACAGAACCAAAGTAACAAACTCTTGGACCTTCTGTAATTGTA  
GGTTAAGATGCTGACTCAGTTATTTCTCTCTCATTTTAGAAATACATGGC  
AGAGAGAGGGTTTTGAATACATGCCAGTGGCCTGCTAAGTATCCCCAGTT  
TTCAGGTAAAGTTTTAGGGCAAACAACTGTTGGCCAGCTGCTGGGTTTGA  
CTGCTGTCTCTGTTTATATCGTATGTTCTTTTCGTGGGCTACTAAAAATC  
TTTAAGGTCTTATCCTCAGAAAACCTTGCCCTAGCAGACATGGCACCACGG  
GAATTGCTTTTTTGATTTGGCTGGGGGATCCACAGCCCCACAATAAACTT  
CCCCATTGGATCTGCAACCTGGTTTCTCTGAGAGTTTCGACGCTCACCATC  
ACCTAAGGCCACGCTTCAAATCCTGCAGCTTTTCATTCTCATGCAAACAG  
ACACCAGAATGGAAGGTGGTGCATATATTATCCACATCTGTCTGCTACA  
AATCCTGCTCAGTTTCATGCTTTTAGGACAAATTCAGGCAAAGGGCCAC  
TGGGAGAGGCTCCATTTCTCAGTACCCTATGCCCAACTCTGTCAGTGAGG  
CAGCAGAATAATTTCTTTCATAAGGTCTGTCCCAGCCAAAAACAACATAC  
CCATGCCCTGTGGCATGGGATCTCCAAAGGGAAGGGACTGTGTTCTGAAT  
TACACTCCAAGGGGAGCTGACCTGAGATCAGATGCCTTAAGACCTGGAAA  
GCAGTGAGACAGGAATATATCAAAGATGGACTTTATCATTTGGGTATGGTT  
GGAAAAATCAATTTTCTATATATGGAACCATGGCATGGATAAAATCCTCCT  
CTCTCATAGTCTGCTCTCCTTCCCCCCCCCCTTGATATAAATTAGAAGGA  
CTGCATTTGTATCTGGGTATCAACACTAAAGAAACAAGCATCTCAAAGTC  
GGAGCCAATCATTTTAAACGATGGAAAAACAAGCCTTCTTTTAGAAAGAC  
ATGGAAAGATGTCATTTATATGCACAGATTAAATTAGCAAAAAATATAGG  
CCCATTCAAGGTCCCTGCTGTGCTTCTTTATGTATCTAATGGAAAAATTG  
CTCCTGATCCAGGATTTTATTATTATTGTTATTATTTGAAATGCCACCTT  
AGAAAAAATTTCCATTTCGATACCCACCTTACTAGGAGAGGCTCAGTACA

AAAATAAATAGTTGAAAATGTGCTGTGACTAAAATAGCGTTAGCCAAATT  
AATGCTAAATTTCCATCTGGACTTCAACATGCTACCACCCAGAAATATTT  
TCTGGATCTCATTTCTATCTAGCTTTTTTTTTTGTGTTGTCGTTCTTTTT  
TTCTTTTCTTTTCTTTCTTTGGTTTGTTCGTTTTGTTTTGAGATTCTTT  
CCATTTGATCTTCTATGGCAATAGGGTTGGGCAGTTGGTAGAAGGAAAAT  
TACTTTATCACAACCTGAGGCTTACCTCCCATCTCTAGGAGGCAGCTAAT  
AGTCTAGAGATGGAGGTAGGATATTCCTGATACCTTTAGGAAGGGGGCAC  
CTGTAATGGTGGTCTTCCCCCAATCTACTTGGCTGCTGGACCTTTTAGCA  
GATTTATTCTTGGCTACAACATAAGGAAGCAGAGTCTCTGACACCAGGGC  
ACACTATTTCTGCATCTTTTCATATGTCTTGTGATAATCATGACTTTACA  
ACTTTTAATGAGTAGAGGAATAAACAAATATGGAATCAAGCAGAGCCTCA  
AACAGAAAAGCTGGACAAAACCAGATAGTGAAATAGTACGATAGTCCCCAT  
AATCTAAAATATTCTTATTATTGGCAGTTCCAAAAAGCCCTGGTACGTTG  
AACAAATTAACACCCACAACCTGAGTCTCTCTGAAATGAACTAAATTCTTA  
CTATGGTGGAGGTGGTTGGCGGGGAGGCAGCTAAAAACAGATTAGAAATC  
CTAAGGTCAAGGCCCTCTTCCAAGTTTACTTACTAATTCACTCTTTGACC  
TTGTACAAGTCACACAACCTATCTGGGTCTCTAGTTCTTTATTTTAAAAAA  
TGGGACTAATAACAGCTGTGCTGCCAACCTCTTGGTAGTATCTAAGCAGG  
TTATTGAATAGTTGCAAATGACCTTTGGAAGCACTAAAAATGTGCTATAA  
TCACAGCACCTTTTTTTCTTTCACCAGGAAGACCAGCACCAATTATTTTA  
TAGCTTAAAGACATTGTTATTTGAAAATTCAAACTAAAAATTTATTGGGCA  
TCTCTTCTATGCTAGGCACTGTGCTCGGCACTTTATATAAATATTGTCTT  
CAACCCACAAAATTCTTGGAAAGTTAAGTATCTTTATTCTAACATTACAAA  
AGTATAACCAAATCTCAGAGAGCTGAAATGACTTGTTTAAGATTGTACAC  
TCTATGTGGTGGAAAGTGCCATTAGATCCACAGTTGGCTAATCCCAAACC  
GTAGGTGTTAATCATCCACTACACAGTATAGAGACCTATTGCTGGAAATG  
AAGGTTCCCTGTTTCAGTTTATTTTAGGCCAGTTTAGTAGTTTTGTGCAAA  
GCTCATCAGATGGATGGGACTTTTTTTTTTTTATTAGGTTGGAGGTAATG  
CTTTTTGGTAATATCTGGAACCAGTGGTCTCAGGATCTATCCACTGTGGT  
CCCTAAGTGACATTCCACATAGTCTGTGTATAGAAAAATAAGTGTCAAGT  
GGGTGTTGTGTGTGTGTGTGTTATAATAAAGAAAGAAATTAAGTGTAA  
AAATATAATTATTTTCCCTACTTATATATTTTTTAAATTTATTAGCAGTAG  
CTACTGCCACTTTCTTTCCCTATTAAATACCAGATCCTATACTAGATCC  
TGAGGGGGCAAAACCAAACATGTTCTCAATCTCAAGATTTCAAAGTTCACA  
TGGTGGAAACAAAGTTAAGAGTCTATTGAGAAGGCAGGTTGTAGTTTTAG  
CCTAGGGTCAGGGAAGAAGTAAACACCTGTGACAGATATTTAGAAGGTAG  
ATATTTAGAAAGTAAAAACCAGTAAATCTTGATTATTGACTCAATACAAT  
GGGGAAGGGACATGGAAGAGAAAGAAGTCTCAAGGATGCCTTGCAAGTGA  
GAAAGAAAACCTCTGGAGTACAGTGGCATTTCCTTATCATAGAGTAGTAG  
TGAGGATTAGGGCAATGGAGGGATTTATGCAAATTTGATTACATATATGG  
GAATTCACATAGGCATTCAATAAACGCTAGATTGCATCTTCGACGGATC  
ATTCATAATTGATAAACAAAGCTTCCTATTTATCTCAAAATGAAAATCAC  
ATGTGTGCATGTGCTTATTTGAGTATGACTTATTTCTTAAAAAAAAGA  
TTTTATTTATTTATTAGAGAGAGAGAGAAAGTAAGAGAAAGAGCACAAAGC  
CAGGTAGAGGGGCAGAGGGAGAGGAAGAGGAAGAAGCAGACTCCTCACTG  
AGCCAGGAGCCAGACATGGGCTCACCCAGGACCCTGAGATCATGACATT  
TAAAAGTCAGATGCCTAACCAACTCAGCCACCCAGGAACCCCTAATCTGG  
AAGACATATTGTAGGAAGGAATCTAAAGATAGGCTACCTCTTTCTTTAT  
AGGCTCTGAAACCTTCTTGTCACCTTTGGTACAGCAACCTACTGTCCACTT  
TTTCCTCCTAAGGCTACAATAGAAGGAGCAGAAATAGCCTGGTTGAGTTT  
CCTTCTCTTGCCCTCCCTCTGGTTAAGGCTCAGTCAATAGTGCTAATGA  
GCTGTGAAATGGCCAAGAGGTAACAGAAAAAAGGAGAAGGAAAATAAAGG  
GATCAGAATTCAAATACTATACGTTTTTGGTGCTTGTGAGGACTTATATT  
TTGCTTATATTCTAAGAATTTGAAATACAATTTGAAAAATAAAGAAGG  
TGGCTACCATGGTGCAGGGTATAACAGATTTTTTTTTTCTACTTACAAAAA  
CTGATTTTATTTTATTTTTTAATTTTTTCGTTTAAACTCAATTAGCCAACA  
TATAGTACATCATTAGTTTCAGGTGTAGTGTTCAATACCTTATCAGTTGC  
ATTTAACACCCAGCGCTCATCACATCACAAGCCCTCCTTAATGCCCAATA

CTTGTTGAACATATCAACTTCCTCTCTGTATCAGTTTTCTACTAATTTTAC  
CTTGTTCTGATTGTCATCAGACAAGGATCTTAGTGACTGGTGGTGGGGAG  
CTGTAGGAGGTTTTGTGGAATAGGACATCATTTTTAGGGGTATAAGTCTTCA  
TCAGAAAATATACTGTAAAGCTCTTTCCTTCCATATCTAAGTCAGGATAA  
CAGAGGAGGCATTTCATTCTAGGTCCTATGATAAACAATGAAGGAATACA  
AATGGGTTCTACTAGACTAACGAAATGACACTTACAGGGATGCATTATATC  
AGTGAGCTCTGAAAATTTAATCACACTGCAATTTGTTAGCCTCTAAAAAG  
ACCCCCCTCAAAATGAAAAGAAATAGGAAACATCAATCTAAAATATTATT  
AATTTGAACTCTGATTA AAAACATTAGT CACAGGTT CAGCTATCACTGTTT  
GGAATAAATGAATGATATTAAGGGTAGATTTGAAATTAATAACTAACTT  
GAGTTTGAGGTTTAAAATCATATTCTATGAATCATATTTTTCTCCTTTCA  
CTCCCTTATTTTTACTGTATCTTTGGTACTTGCTGCACTTTCTATCTTTAT  
CACGTCAACAGTTCCCTTCAGTGAAAAGGC AAAAGTTAATATTACAAAAT  
TAAATCTGAATTATTTCTCATTTGGACAAATTCTTACGGTTGAATGCACA  
CATTAGTGAGGCTTTGCTTCTTAGGGTAGGACTACTTATTTTTACATATC  
CAGGATGGCTTCAAGAATAATTTAGGTGAATTACTAGGTTTCAAAAGAAA  
TAGGATTTTTTCATTACAGAATTTAAGTTCAGTAAGAAAGCCCCCTTTCCTG  
GTAGCAATCGAACATGCTGCTCTAAGGGACATGTGTTGAAATAGGGCTCA  
ATTCACTGGTAAGAGACTATTTCTAACCCAGCATCATGGGTCCAGCAGAG  
CCACAGGGTGGGGATGTGAGTCTACAGATAAGCCTCTGCTTGCCTGAACA  
CCCACAAAGAAACATTCAGTGGTCGGGTACCCTGAATCCTGAAACCACAA  
ACCAAGGGAGTCCGTCCAAAGCTCCTTTACCAAGTTTAAATTGTGTGGAT  
GTGTGTGCTACCTTTTTCATCCATTTCCCTCAGGTTACAAGCAGGCACAGAA  
CTGACATTTATGTTCTCTAAAAGACGTCTTATTATCACTCACTTGGTATC  
AGCCAAC TGATGAAAGCAAAAATGCACTTTGGGAACTACCGAACGGCTAC  
TTTTCGTCATGTCATCTTTGGCATTTCCTTGGCCCAGCTGAATTAAGGG  
ACAACTGAGTCATTGCTAGCTGCCTTCCATATCACCTATTTCTCAAGGA  
ATCAAAGTAAAAGTTATAAAAATAATTAAAAGGCCAAGCTATTGTTTTCCC  
TGATAGGACGACTAAGCACTAGCATTTCTGTAGCACCTGGATCAGGCATG  
CTGTGGTTTTCTATTATTCACACAGATTTGCAGTTTTCAAAATGTATTAGA  
ACATATCCAAGGTCTATTTCCACAAGTAACTCCTGCTGCATTGGGGGGA  
AAATGTAAGAGTTTTTACAAGGTTTCAGATGCTTTTACACTACCTTACAAT  
ATAGAACATGGCAATTTTATGTAATTTTCACTTATTCTTGTTCTGAGTG  
AGAGTGTGACTCTCTTAATCCAACACCAGAACTATAACCGTGAGGGGCA  
TTTCGATCCACATTGCCACCCCAGCACTGAATTTGAATATGTTATACTCA  
GGCTTCTGTCAAAAGAAATTTTCCAGAACTTCCACGTCAACACCTTCTCT  
GGACCAAGGGGAGAAGGAAAAGTTTCAGTGATAAATTAGTCCATATCCAT  
GATTTCAAGGCATATTATATGCTTGAGAGATGAAAGACTAATTTCTTTAT  
ACACATGCACACACACAGATAAATATACACACAATTTGTCCTAGTAAT  
AAGCTTAGCATTAACATAGTGATGATATAGGTATATTATTTATTTTTAAA  
GTTGTAAATAACAACAAAATAGTTTATTTTTCTCTTTGAATAAACCTTT  
AAATAACTGTCTCTTTCTCCTGTCCAGAAAATCATGGCCCTATTAATTCC  
CCACGAGTCTGATTTTAATCCTTTCTTTCACTATCCTCATCCTTCAGATC  
TTCCAGAGCTTGTTTCATGAGCCCTGCATTTCCATGAAGATAGAATGAGGC  
ATGCATATATACCTTCTTTTGGTACTGGCGGGAAAATAATTGAAATGCAT  
AATGGGTATGCAATTATTTAAGGCATTGATTGTGTCAACATACCAAACCTT  
TTAAATAACTTAGTAATTTCAAATGTTTGTGAGTATATTAAAGTTTAAAA  
ATATTCATATATTTATTTGACTGGTTTACCATTTAAACCACATATGACTG  
GTTAATTTTGCTCCTGTCTCTTTTGGTATCATTTAGGGACGCTTTCTACCT  
CAAATATGATGTGTCTCTTAAAGCCTCTTTATAATAGAAATGCACTGATTTG  
TGATAACTCAAGAATGATGATGTGATTCTTGACATAAAAAGAAGTCATT  
AAATCATTTTTAAGACCTGGCTCGTAAGGAAATCAGTAAATTTTAGAGCAA  
ATTTCAAGAGGTGAGAAATCCCACACTGTAAGCTTCCAGTAATATATATC  
TTATATTAAACCCAGACATTTTAAAAATGTATTTTATGGTTGTTATTTAT  
GTAATATTGGCTTTTAGGAATTTTTTTTCAGCATTTAGTGTCTTTGTAAC  
TAAATATAATATATAGAATTGCTGAAGAAAGAAAAGGTTTATCTCTTTAT  
GCCACTTAAACACACAATTTTCATATGGGTCATGCTTTTATATGTACTTTC  
ACTGATTCTGTGAAATCTGAAAACAAAGTGAGAATACAATTGACCCTTAA

ACTAAGCAGGGGTTAGAGATGTTGACACCCTCTCCCACCCTGCACAGTTG  
AAAATCCGTGCATTAAAAAAGAAAAAGAAAACCCATGTATAATTTTT  
GAGTCTCCAGAACTTAATACTAATTGCCTACTGTTGACTGGAAGCCTT  
ACTAATAACATAAACAATCGATTAAACATATATTTTGTATGTTATATGCAT  
GACATACTGTATTCTTACATGAAGTAAGCTAGAGGGTGATATTTAGAAAA  
TCATAAGGAATGGGCACCTGGGTGGCTCAGTCAGTTAAGCATCCAACCTCT  
TGATTTTGGCACATCTTAGGGTTGTGAGATCGAGCCTTTTGGCTCAGATC  
ATGACTCTGTGCTGAGTGTGGAGCCTGCTTAAGATTCTCTCTCTCCCTCT  
CCTTCTGCCCCCTCCCATCCTCTCCCTCTCTTTAAAAAAAATCATAAGGA  
AGAGAAAATACATTTATAGTACTATACTGTATTTATTTTAAAACTCAC  
AAGTGGACCAGGGCAGTTGTGTTACTCTGAGGAAGTGCATTCTATATCCA  
TGCAATATAGCAGGTAACCTCTTGAAAGAGGGTGAAGGTAGGAGATGCTTT  
TAATTGGAAGGGAAAAGGTGGTTTCAATTTAATGAATCAGCTTCATTTTT  
ACACTGTTTTCCCTTCTCAAAATTTGACAGTCAAAATTTGAGTTTGGTTTTA  
GCCACACACTTGTCTTCTACTCTTTCCTTTCACACCTGCCACGAAGTAGAT  
AAAGGTGTGAGAAATGTGAGCCCAGTCCAGTCACGCAGTTTTTAAAAAATG  
GTCACGGTAATAGGTGTCAAAACAGAGTTGTGGTTGTAAGAAAGAAAAATA  
TGACTGCTTTAATTTTAAATGTTTGTAGCATTGGCAATATATTTGGCTGTTG  
TCCTCTTGTCCATATTTTCTTTGAGTATTTGGCTCTGTGAAGAAGACAAT  
ACATTTCTATTACTATTTTAAAGTTTTAAGAGCCATTAATGTATTTATACA  
TAATGCTTGGGGTGGGGGGAGTTATTAGTGTCTAGTTAGTTTAGGTTAAG  
CATTTAAATATCAAAAATATCAAACTGTCACATAACAATGGTAAACT  
ACCAAAAGCTATGCTGGTATATATATGTTATAGATTTGTATATTTATCAT  
TTGTATTTGGGAGTAGTCTTTAAAATGATCTGCAAAGTAATTTAAAAAA  
TTATTAATATTTACTTAAAAATTTTGAAGGTTTATTTAAATGTTCCCAAG  
ACAATCTCATTTTTGTTTTATTTTACTTTTTGTTTTATTTTCAATTCATTT  
TACTATTTTATTTTATTATGGGGGATGAAGTACATAGTAAAAAACAAC  
AACAACAACAACAACAAAAAACCAGTGTGACAATTATTGACTCACAAT  
AACTAAAAAGCTTTAGAAGAAAGTAACACATTCCAGTCTCAAATCTAA  
TTCTGATTGCAAAATTAGGTATTTTTGGAAGAGGAGTATGGAAAAAAT  
AAGTAAGTGTGCAACATCTAGAAATCTTCCTTCCCTAGTAGACTGTGCC  
TGCTAGGGTTCGGGGTAGGTATTCAGGAAGTCTGTGGCAACTATTTATTC  
AGGAAAAAGCCACATGAGTGTTCCTCTATGCCATGAACTGTTGCATGTT  
TTGTTAACTGTTTAGAATTGGTCTGTGAACTGAATCCTCATGTGCAGAA  
TTTTAATTTTCACATTTTGTCTTTCAAACCCCTGTGCACCATTAAGAAG  
ACAGAGAACCCCAAGGTCACAGCAGGAATCTTCCAAGTGGGGCACAGTGC  
TGAGCAGCACAAATTCAGTGAACAGGAGCAAAACAGAACTTGTATTCCT  
GCCTACCTTTTATCTACAAATGTTTGCTAATATTTAATATACAGCTGTAT  
ATGAGTGTCTCCCATGTCTGTGTCACCTTACAATGTATGGATTGGCATGA  
GCATGTAGCAGATGCTCTTTCTTTCCCTATAATAGCAAGGCACTGTGAAA  
TATGCAATTTAAATAATATTTAAGTAGATGGACAGACTATAATGTCTGCT  
TTTAACTAATCCAACACTCCTGAAATGGATACATGGCCTAGATGGTTTCT  
ACAAAGAAGTCTTTCTGTGAATCCCTCCTCTACTTTTGCCACCCATTAAC  
TGTGTGACTTGAACACTTGAACAGTTCACATCTCTGAGCATCTGTTTCCT  
TATTCAAACCTCGGATAATGGCATATTCTTCACTGACTATAGAAGGCATTA  
AATGAGTTAATAGATATAAATATCTTAGAACAGTGACTAGAACATACAAC  
TTAAGACCAATTGCTATCACCTTAATACAATTATGTTTGCTAATGAAAGT  
AGGAATCAACAAAGAAAAATCATAGAGCTGTGCTGCTTTTACTCTGAG  
AAAAAGTTTTCCCTCAGGCATTGTATTAATCAGTGTTTTCCAGAGAAATA  
AAACCAATAGGATGTGTGTATGAGTGTGTGTATATGTGTGTATACA  
TACATATGTGTGTAGACACAAAGAAAGAGGTTTTGGGATGCTTGGGTGGT  
TCAGTTGGTTAAGTGTCTGTCTTGGCCTAGGTCATGATCCCAGAGTTCT  
GCTCAGCAGGGAGTCCACGTCTCCTTCCACTCCTCTCCCCTCTCATGCTT  
GTGTATGCTCTCTCTAAAAATAAATAAATAAAAAAAGAGAAAAAAGAGG  
TTTTAAGGAATTGGCTCTCATGACTGTGGAGGCTAGCAAGTCTGAAATCC  
GTAGGGTGGAGAGCCCTAAAAAAGTTGATGCTGAAACCATAGAGCTTAAG  
GGAAACCTAGAGGCAGTATTCTTTCTTCCTTTTCTTGGGTTACCTCAGG  
CTTTTGTCTTAACATCTTCAACCGATTGGATGATGTCTACCCACATTATG

GAGGGTAATTTGCATTACTCAAAGTCGACTGATTTAAACAGTAACCACAT  
CAAAAAAAAAAAAAAGGAAAAAAAAAGAACCTTCACGGTAACATCTAGAAT  
GGTGTGTTGACTGAACATCTGGACACCACAGTTCAAGCAAGTTGACACATA  
AAATCAGCCATCACAGACAACTACAAGTCAAAAACAATAAGAAGCTAAT  
CAGAACCAATCTATTAGTCATGTATTCATTTACTCTTCATTCACTTTTT  
AATCTGCCAGACTCTTTCTATCAACTGGTCTGTCAATTCTAGGTTCTGAGA  
ACATAACAGTCAACAAAATAAGTTAGTCCCTCAATCAAGAGAGGTTATAT  
TCTCGTGGTGGTAGATAAACGGTAAACAAATAGATAGCTTAAAAAAATC  
TATACATACAAGTGCTTACATTGGTTAGATGGTGATGATTTGCAGAGTAA  
GGGGAGTGAGGAATGTTGTGGGTGGAGAAGGATATACTGTCAGTAGAGGC  
CCAAGAAGCAGAAACATGAAGGAAATGAAGGAGCTACCCATGCAAATACT  
ATGAGGAAGAGCATCCCAACAAAAGGCAGGGCATGGAATGTTCTTGATA  
CGTTCAAGGATCTGCAAGGAGTATTTTGAGCAAAAGAGAGGCATAGTTCTG  
ATTTACCTTGTGACAGTAGAAGACTCTAAGTATTGTGTGACCAACAGACT  
CTGTGGGGACAATTGGGACAATCTCTAGAAGGGTACTTCAATATTACAAT  
GTTGGGAGGGTGATGATGGCAAGGACCAGAGTGGCAGCAGTGATGGTCAG  
TGGCTTGCTCAGATTTTCAGAAAATAGGATGTTTTGAAGGTAGAGTCAAAAA  
GATTTATTGATGAATAGGGTATGATTTGTGAAATAAAAAAGAAGACTGGT  
TGTCTCCATGGCTTTAAGCCTGAACAAAGGGAGAGTTACAGTTGTCCTTT  
ACAACTATGGTGACAAATGCGGGGAGAAGCCATGAAGGAGAGAAACATGGA  
GTTGGGCTGGGACCTTCTAAATCTGAGATGCTTAACAGACATAGAGGTAG  
GGGTATCAAGTCAGTGTCTCTAGAACTATCTGGAGTGCAGTTGAGAGGAT  
CAGGCTTGAGATGGAATTTGTAAGTCATCAGCAGTTGGATAGAAAGCCA  
TGAATGTGCATGAGATCAACTACATGCATACTACGTCTGACTGGGTGATG  
GATGGTATACTCTGCCATTTAGAACTCTTGAGAGAACAGAATGAAATAGC  
AAAGTAAACATAGGGTCAGAAAGGTAAGCTTGGAAGGAAGAGAAAGAGTGC  
TTCCCAAGGGTCAAGTGAAGATAGTATGTCAAGGAGGAGGGAATGGCCAC  
CCTTGTCAGAGTCTGTTGGATGGCCACATATCACGAGATGAAGAATTAGT  
GGATGGATTTACATCTGTGAAGGTCATTGGTGACCTTGGAAGAGCTATG  
TCAGTGGGGCAGTGCTCTAGGTGAAAGAGGAGTCATAGGAAACATTTGGA  
AGAAATTTGCTATAAAGTGAGATGTAGAAGAGGAAAAAGTAAGTCTCCTTT  
TACCTTCTAGGTTTTTGGCTAAGACCTTTTGTAATAAAAGATGGACTAA  
CAAGAGAAAAACCAACAGAAGTTTAATAGCATGTAAATCTCTTGATATA  
CGAGGAAGATACCCAGAAAAACTGAGTAATTTCCAAAAAGTGGTCTAAGC  
CACTATCTTCAATATCATCTCCAGCTAAAGACAAAAGGTAAGAGGGGGGT  
GGTTGGGAGGAGGATGGAATATAGGAGGTTATCAGGAAAAGCATGGTGAA  
CAATATTAAAGATGTTTGTAACCTTAATTCTTTGTCTCTCCATTGATAA  
GTTTCTAGAGATTTAGTCATTCTTCTCTTCCAGGTACAGAGAGAGACATT  
CTTACAAATGGGACTTCCCTTAGAAATGTAAATGTCTTTTACAAAAGGAT  
GCCCCCCCCACGAGCTCTCACATGCATGGGCACGTGTTCTCTCACTTTC  
TCACTCTAAAATAAATAAATATTTTTTAAAGAAAGAAAGAACAGAAACA  
ATTGTTGGAACATATGTCTTGATTTAGGAGAGAAGAGGATGGAAGTTGAAG  
AAGCTGCCCTTCCACAGAAGCACTGAATCAATCCCCCTCTTATTAGCAAG  
AATGAAGCAGAGCATTTATCCACAAAAACAAGAAGGGGTCAAAAGTGGC  
CGTAGACACCATTGCCTTGCTCTTATTAAATACATTATCTGTAGTATAGC  
TAGTATTAGTATATTAGTGAGAACCACAAAAGATGTTTATGTATGCTGTT  
AATACTAAAAGATTTATATTCTCTTACATCTTAAAAACTGATTTTGAATG  
TATTTAATATTGTCTTTGTCAATAAATGTACAAAGATGCTTGTATTTGAA  
ATAAATAAAAAATATATTAGGGAATAATTCTAAAATGTAAATTAATATTGGT  
AGGGGTTTTATAACCAAACCAAAGGGTTTACCCCTTGGGGTGATCAAA  
TTGAAGGCAACACATGGAAGTATTGAAAACAAGTAACCTTTTATCACTTG  
TTGCAAGTAAGGAGACAAAGAGCTTTCAAACACCATCTCCTCATTGGGT  
TAGTACAGGAAACTTTTATTAGGGCATCGGGAGTGCTTCAGGAGGTGGG  
AGCAGGGAGCTTGACAGAGGCATTGTTGGTTCGATTGCACGTACTTAGCA  
TGTC AACATGTTGTGCATACATGGTATGTTAAAAAAAATGGCAGAAAAC  
CCCACCCGTAGGAGGGGCTCTTAGTATTATAATCACCTAAAAGTAACCTTT  
GGGTCAGCTCAAGGGGGCTTCAGAGTAGACCCTCAGCTCCCATCTGGCTC  
AAACTGGCTCACATAAGGGGGCTCCAGGTGAGACACCCAGTTGGGCTTCT

CCTTGGCTTGAAGTCTGGTTCTACAAAACAAAACACATTCCTTATTCCCT  
TGATTAAGTTCATTCATCCGAGCTCTCAGTGTATCATAGGAGTTTA  
GAGACCATAATTGTGGAAAGTTGTGTGTATGCGGTAGGTGGGGCGGTGGA  
ATGTTTAAAGTTAAGCATTAGAAGATTTAAAGGTTAAGATGTTAACATTG  
AAAAGTTAAGAAAATCAATTCAGAGAGTCTAAAGACCTGTTAAAGACTTT  
AATTTTTTTTCTTATCCAGAATGGTGAGGCATCAGAGAATTTGAAGAAATG  
GAACAAAAGGGTCCATTCCATCTAAGTTTCAAAAACTTTCTCTCATGGA  
GAAAAGTTATGAGGCTTTTACTGTAATAGCAAGAGAGGAGAGAAAGAGAT  
GGAAAGAGACACACAGAGAGAGGATGATGATAAGGACCTGAATTTGAGAA  
ATAATAGTAACATTTGGGGAGGAAAGGACAGATTGAAGAAGCCTGAGAGA  
TGGTGGTGGTATTTATTGAGATAAACCTAAAGGGTCAGTAAGAGAATAA  
TTTGTCTAGGAAGCCCTGGAAGAGGTGGGGGAGAGGGGAAATGATTCATTTA  
TTTTTGGATACATCCAATTCCAAATTCCTGTGGCCAACCCCAGTTGGTCT  
ATCCAGCAGGCAGTTTTTGGAGTGTACATCTGGAGCCCAGAAAGGCATTC  
TAAGTATTGAAATGTTGGATTTCATTAGTTTAACTGAAATATTGCATTCC  
GACCTGTCTACCATTGGTATATACCCTCCTGTTTCATGCTTTTTTTGTAC  
TTAGACTACTTATATATGTCCATAAATAAACAGTGTCTGGTTTTTTTA  
AAAAAATAGCTTGCATAAGTGGTACCAAGATGTGTTTACACTCACTGTTA  
TGCTGATACATTGATCCAGTTTCAGAGGTTGGCAAACAATGGCCCAGGGGC  
CAAAATCTGATCCACCACCTGTTTTTGTGCAGCCTTCAAACCTGAAAAAGT  
TTTTTTTTTCAAATGAACATTTGCAATCAATTTGATGATATGAAACATTA  
ACTTTGAACCTCAATTAGATGAAATTTTACCCCATAAAGGGAGTCCTATT  
TTTCTCATTAGTAGACTTGTATTACAAAATAAAATAAAGTAGTACCTAAT  
TTTTACTACTATATTTTGAATTAAAAGAAAAAAAACAACCACCCACATG  
GAAATTTTTTCTGGAACCTACATAAGTACCTATATAATACCCTCAACTGAT  
AGCTTGGCTTGTAAAGATCTAAAAAAGTAACTTGATCAAGGGAATTCATT  
AATATTGACAATTGATGCTTTTCCATTTTATAAGTACATGATTATTTATG  
TATCCATTAATTAATAAACTACATTTTCATTGTTTTGTATTTTTTGCTATT  
AGAAACAATGCTTCAGAACTATCTTTATGTGTGTTCTTTTACACATGAAT  
GACACTTTATCTATGTATGAACTTAAATGTGGTTTTGTTGGCTTAGAGGG  
TATGTGTACCTTCATCTTTTTTATATATTGCCTATTCATTACACAAAGTG  
CTCTGACAGTTTACATCCCAATCAGTGGTGGGAGAATTTCTCACCAATAA  
CTTAACCAATACTTGTTAATTTCTTAACTTTATATAATGTAATTAATAT  
AATTTCATATTTGAACTATGAATTGCTTAAAAACATGTCTTGTAGTTTCT  
AAAATCTATTTTTTAAATCTATCAATCTCTTTCTATTGTATGGACTTTTTT  
ATTAAAAAGTTGATCTAACGGAACTGACATGCAGATATTTACAACATAG  
TATATAGTCAATTTGTATCAACGTTCCATGTGTTCTTGAGAAGAATTTGT  
ATTTTATAAATGCATTCTGTCTTTCTATAAGCAATTAAAGCAATCACTT  
CTCGGCCTTTTGGCTGAGATCAAGTGTAGTACAGGCAACCAACCAATCA  
TTTATAATGTTGAACTCTATCATCTACTTTTTATTTTAAGATTTTATTTA  
TTTATTTGAGAGAGAGAGATTGAGTGAGAGAGCACATGAGCAGGTGGTA  
GGGGGAGGGGACCGGGGAGAAGCAGAGAGAGAAGGAGAAGCCCACATGCC  
ATTGAGCAGAGAGCCCAATGCGGGCTCCATCCCAGCATCCCAAGATCATG  
AGCTGAGGCAATGCAGACGCTTAACTGACTGAGCCACTAATGACCCTATC  
ATCTACATTTGCCTGATTTATTGAATTACTCTTACAGAAAGGCATGCATT  
ATTGCAAATTAAATTTCTCTTTGACCTGTTATCAATGATTGCTTTATATA  
TTTGGGCCTGTATTGTTAGATACATATAGATTTAATTTTGTGTTTGTGTT  
CTAGTAAATGGCTCCTTCATCATTAAGTCATGACTCTCCTTTTACCCAAA  
AATCTACTTTCCAATATTGATAATGATGTATCAGCTTTCATTTGCTTGCT  
ATTTCCAGTTATATTTTCTCCATATCTTTATTTTCTATCTTCCAATAAC  
AGGATATTTTTTAAAAAATCTCTCAAAGCACTAGGTCATTTTATTTTTCC  
AGTTTTTAAATATAGTCTTTTACAGAAGACTGTATTTTGTGTCAGGTAA  
TGTACTTGCTGATATCTTGCAGATCTTTAAACCATCATATTGTGCATTC  
TCTATTTACCATACTTTTTTTTGCCTCTCTTTTATTCTTTTCTTAACTT  
TTATCTATGTAAGCCCATTTTACTCCCTTAATTCTTTTGAATGTGCTCAT  
TTTATTCTTAATTGCCTACTCTTAAGTTTTAAAAATAATTAATAGACTTTA  
TTTTTTAGTTCAATTTTAGATTTCATAGAATAATTGAGTAGATTGTATGTAG  
AGTCCCATATATAACACACCTCCAGCCTTATTATACAGTTTTTATTTTTAA

AATTTTGCACCAGTGTAACAGTTTTATTACAGTTAATGAACCAATATTGG  
TACAGTGTCATTTACTATAATCCATAGTCTGCATCAAGTTTCACTCTTTG  
TTTTGTAGAGTTCTATGGATTTTGACAGATGCATAATGATAGGTATGCGC  
CATTACATTTTTCATACAGAATGGGTTTACCTGTGCTTCACTTATTCATTC  
CTTTCCTCCCTTCCCCGGAATCCCTTGCAACCACTGATCTTCTCACTGTT  
TCCCATCATTTTGCCTTTTCCAAATTGTCATGTATTTGGAATCCTCTATT  
ATGTAGCCTACCCAAAGTGGCTTCTTTCACCTTAGCAATATGCATTTAAGC  
TTCTCCATGTGTTTCTGTAGCTCAATCGTTTTTTTTGTTTTGTTTTGTTT  
TTTTGTTTTTGTGTTTTGTTTTGATAATGAATGCTCTGCTGTATAGCTAGC  
TGTGCCAGTTTGTGTTATCCATTACCTACTGGGTTGCTTCCAGTTTAGGA  
CAATTACAAATAAATATTTGTATGCAGCCTTTTGTGTGGACATGAGTTTT  
CAACTCATTTTCGGTAAATACCAAGGAGTGTGATGCTGCATCATAGAGTGA  
ATATGTTTTGGTTTTTACAAGATGCCACCAAAGTGTCTTCCAAAGTGTCTC  
ACTATTTTTCATTCTCTCCAGAGAGAATGGGCATTGCTGTTGCTCTGCATT  
ATCTGCAGCATTGGATGCTGTAGTTTTTTTTAAATTTTAGCTATTCTAATA  
GGTATGTAGTAGTGGTATCTCATTTTTTATTTTAAATTTACGATTCCCTAAT  
GATATATGATATTGATAATATTTATTTTTTATTAATAGACTATATTTTAA  
AAATAAACTATTTTATTAACAGGTATAATTTTAAATTTCTCATGGGAGAAT  
TTTTCCCTTACCAGTCCAGACAGACAGCAAATTTCCCTGTCCCAACGTGTG  
CTAGTGGATTAACTTTTGCTGTTTCCATTTTCATAGGGGTTACATTCCCTC  
ACAGTCATTTGGGTTGTACAGGAGTCTCAGAATCAACTTTTGCTCAGTGG  
TTTCAAATCCATATTTTCTACCTGGTAGTGGGCCATAGGATTCCAGATAG  
CCATGATGCTGCTGTAACCTGGCATATGTGATTCCCTCTTTTTTATTTTT  
ATTTTTTGGTTTGGTATCCCCCTCCTAGTTCCCCGAATTTGGCTTTTCCAT  
TCATTCTCTCATTCCTAACTATCTGTTAAGTAAGGCATCATCTAGGGGCA  
CCTGGGTGGCTCAGTTGTTTAGGCCTCTGCCTTCAGCTCAGGTCATGGTC  
TCAACGTCCTAGAATCAAGCCCCACGTCAGGCTTCCCACTGGGTGCTCTG  
TGGAGCTTGCTCTCCCTCTACCTCCCCCTGTTTGTGTTTTCTCTCTCTCT  
CTCTCTCTCTCATCTCTCTCTGTCAAATAAGTAAAAAATAAGGCATCAT  
TTAAACACAGCCTCTCACTTTATGGGCTAGAAGCTAAATAGTTTACAAAA  
TTACTGAGATAATAGAATTTTATAATGAGGATACGTGAATATTTTTCTTT  
ATTTACATTAGGAAAAAAATTTAAATAAAAAAGCTAAGTTACCATCTTA  
AGAAATAGAAAAGAGAAGAGCAAAGTGAACCAAAGAAGCAGAAGGAAGG  
AAATAATGAAGAAGAGATGGTGGGGTTTTTTTTTTTTTTCATTTTAAAC  
AGAAAAATAACAGAAAAATCAGTAAAAAGAAAGGCTGAATTTAAAAAAT  
TAATAAATTTTATAAAACAGTAAGAAGGCTCCAGTTGTGAACCTAGGAAGG  
AGGTTCTCACCAGATCATCATCATGCCGACACCTTGACCTTGGACTTACT  
AGCTAAAGTCAGAATTAAGGAAAAATAAATTTGTTGTTTAGAACTACCCA  
GCTGCCTCTTTCACATCAGCCTAAAAAATACTATAGCTATTAAATAAAT  
TGAATCCATAGCTAAAATCATCCAATAAAGAAAACCTTTAGGCCCATTTGA  
TTTCACTAGCAAATTCTCCCAAATATTAAGAAATAACACAAACACTATGC  
AGTATCTTTCAGTAGATGAGAAAGGAGGGAACACTCTACAACATATTTTA  
TGATGCCAACATTACCTTGATAGCAAAACCAGATAAAACATTAAAAGGC  
AGAAAGACCATAAATCAATATACTCATGAACATAGATGAAATAATCTCAA  
TAAACACCACCGATTGAATTCAGTATATGTAAAATGTATAATTCTATCA  
AATAAAATTTATCTTAGGAATACAAAGCCAGTTCAACATTCAAAAATCAA  
TCAGTGTCTATCTATCATATCAGCAGAATAAAAGTAAAACCAAAAAAAAAA  
AAAAAAGGTAATTACCTTAATGGATGTGAAAAGCATTGATAAGGCTTA  
ACAGATTCTATTTATAATAAAAACTCTCAGCAATCTAGGGATAGGAAAAGA  
TTTCTGAACATGAAAAAGGCATCCACAGGGAGAAAGAGCTTAAGCTAT  
TATTACACTCAGTTGTGAAAACCTGGATGCTTTCTCCCTAAAATTGGGTA  
CAAGATAAGGATGCACCTGCTTCCCTACTCCTATTTCATCACCATACTGGAA  
ATCCTGGCCAATGAAATAACACACGAAAAAGAAATAAAAGGAATACAAAT  
TTTAAAAGGAAGAAATGAACTCTCTTTTTCACAGTTAATACCATCTACAT  
AGAAAATCTCAAGGATTAGTTCAAATTAACCACCAAGAGCTATGACTAC  
ATAACTATTACAATGGTAAGAAACAAAAACAAACACAAACACCTGACGTT  
GCCAAGTGCAATGAGGACAGAGAGTAATTGGAATTCTTATGCATTGCTGG  
TGCGGGTGCAAAATTATATGGCAAAACATTTTGGCAACTTCTAATAAACT

TAAACATACACTTACCATCGGATTGAGTAATCTTGCTTCTAAGTATTTAA  
TCAAAAAGAAATGAAAATTTATGGTCATTCAAAAACCTATATATGGATGGT  
TTTAATAGCTTTACTCAGAATCACCAAAAACCTGGAACAACCTGAATGTC  
TTTCAACACATGAATGAATCAACAAGCTGAGGAACATCCACACAATGGAA  
TATTACTCAGTAATGAAAAAGAATGAACTTCTCAAGTGGAATGGCATGGA  
TGAATCTCAAATGCATATATTATGTAGTCTTAAAAAGCTGAATATTACTG  
ATTGCATTTAAAAGTTTTTCTATAAAAAGCAAACTAAACAGAGAAGATA  
TTAGTAGTTGCAAGGGGTTGAGTAGAGAAGGACTGACTACATAAGAGTAG  
CATCAGGGAATTTTTTTATATCATGGAGGCATATTTACTGTTTTCCATGG  
CAATTACATGATTTTTAAAATTTTTGTAGAACTACATACTAAAAGAGTAAA  
TTTTTATTGTACATAAAATTTTTAAAATAAAATAATGACATGAATCTTGATTA  
TCATATCATACTGTATCTTTTTCTTATTAAAAATAAAATACTCACTACATA  
TGTAGCTGGATTTTTGTAATTAACCTTTCCACCTTCCTGTGGAAGTTCCAA  
TACTAGTCACTGGCTGAGTTAAGAATTAGAGAGATGATCTGATTTGCAAT  
CATCATTTTTCATGTTCTAAAATAAACTAATTTATATTTCCAAAATTTTTTC  
CTAAGATGGATGACTCCAGTAATTTCTTCACCTCCCTCATTCCATTTCCAG  
TAACACTAATAACTTTGGGTTTTCTTAAATTTGGCCCCACCCTAAGGCAAAG  
ACAACCTCTTGTGGGGATCAGCTTCTTGGTGAGAATAGGATGTTTCCACC  
CACCCTGTATATTGACACTTGCTATGCTTCTAGCCATAAATCACTTGAT  
GACATCACATTGTTGCTATAAAATCCATGAACAAATAAGCTATCCTTCCAT  
TAGGGAACATAAAATGGTCCATTTTCAGACTCAGTCTGCATACTGTTTAT  
GGGTTGCTTGCTGCTTTTACAGGGTTTTTACAAGAGAACATCCACTGTTTCT  
TTCTGGCGCTACTCCAGAGAGCAATGTTAACATTGCCCATTTTCCAAGAT  
ATTTGGTGGAACACTGCATAACAGAGCCACATTTTCCATCAGGGACCTG  
CACCATATTTTAGTCTCTATTTTCCCAGACAAATTAACCCACTGTTTTTA  
TGAGGTTCTTCAAACGGGCTACACAGTAGCTCATTTTATTAAGTATGGAT  
ACTGCCACTCAGAAAACCAATCATATGATAACAGAGCCTAGAGCTTACAG  
ATCGTAGAACATATTAATTACTACCTCAGTGTCTGACTCTAAATTACTTA  
CCTTCCTTAAGGAAAGTTGGGCAATGGGCTAGTGTATGACATTGGAATGG  
AAAGCACCATGAGCTCAGGTATCTGCTGAGGTGGGGAGGGGTGGAACAG  
TATGGGATCCTAAGCACTGAGCATCAAGAAGGGAGTACATTTTTACACC  
GCTCATTCCTTCATTTCTTTATTTGAGCCAAAAATGAAGCTCCAGTATC  
AACACTCAATTCTATAATTTTCTTCATGTTTTTAAAGTCAGCAATTTAG  
TTTGAGATTTCAACCCAAAAGTAAGTCGTAGTAACAATGAATAAGTGGTA  
AAGAGATTCCTCAGTTTAGCTCAAAGAAAGAGATAATAGATAGATGATAC  
ATAGCTGAAGCTACATGCATATACACTTATAGAAATGTGTATCCATTTAT  
AATTATATGTAATTTATAGAAATATATACATATTTATAGAAACACAAGGA  
TTCAAAGTTTTGAATTGTTACTGACTAGCCCATTCAGTTATTATTGTTAG  
ATTATCCAAGCCAATCCCTGGTTTTTGTCTTTTATTTTTTACTCTTT  
GTCATCAAAATTGAATTACTTAGGTTCAACAGGTTTGGGATGGTTCCTTG  
GTTATTTCTATGATTCCTGGTCTTTTGCTTAACAAATAGCAATTAGAGT  
AACACTCAATAAGATAGGCTAAATTCATTTATGCTATGACAGGCACTGTA  
GTGAGGGTTGCCTATGTTTTATCATTTTAAACTACTACAACCTCTATGGG  
GCATGCGCTGTTATTATTTCCACCTTGCTAGATTAGAAAAATAAGCATCAG  
AATATTGAACACTTACCCAAAGTTGTCCAACCTGTTAAAGAGGATCCTGA  
TTTTTGAATGCATGTCTAAATGACTCCAGGGAACATTCTCTTAGAAATAA  
CATAACCCTGACCCAATTATTAGTAATTTAAATAAGACAAGTGAGTATGT  
TGCTATTTGGTAAATAAAGGACCTTACTAGGAAAGAGAGAGATAACTATC  
GTGAACCACTTAGAGAATATAATAAAGCTATATATAGACCATCTCCCTC  
CAAAACCATCCATAAATACTCAAAATATTTTTTCATAATTCTGCCCACT  
GATTTGAGATGTTCAAAAAGAAACCTAACAATAAGGCCATTTAAAATCTG  
TATTTGTCTATTCTTTCTTAAACCAATAGGATATGTATATATGAAATTT  
ATTATGATAAGGAATTTGGTTGTCTGCTGTTTTGCTGTCTGCAGTCTGCAA  
TCTGGACATTCAGGAAAGCCAGCGGTATGGTTCTGGTCTGAGTCCAATGG  
CCTGAGAACCTGAGAAGCAGACCGTGTAAGTCCTAGTCTGTGTATAAAAG  
ACTGATGTCCCTGCTCCAGAAGACAGGCAGGAAGAAAAAAGGAATGAATT  
CTTCCTTCCTCTACCTTTTACACTATTCAGGCCCTCACTGGATTGGGTAA  
CACCACCCACAATGGGGAGAGCATTTACCTTTACTGAGTCCTCTGACTC

AAAGGCTACCTCATTTGTAGCACCCCTCACAGGAACAACCAAAAATAATTT  
TTATTTAGATACCTGAGCTTCCTCTGATCCAGTCAGGTTGACACATAAAC  
TGAAC TAACACACCCTTATGTCTCAAGTGATTTTGCATTTTTTGTGGTTT  
TATTTGTTTACAGTAGTTTCAAGGCAATTTGGGATCATGAAGAGATATAA  
AAGGTGGCCAATACAAAATGCAAAGTCCAGGCTTCATTGTCAGATCAGCC  
TAAATTTAAATTTATCTTTCTGGGGCACCTGGCTGGCTCAGTCGGTAAGG  
TGTCTGACTCTTTAATTTTCAGATCAGGTCATGATCTCAGGGTCATGAGAT  
CAAGCCCAGGTCAGGCTCCATGCAGGGCCTGCTTGAGACTCTCCTTCTCT  
CTCTGCCCCACCCCTAATTTTCTCTCTCAAATAAAATAAATCAAGTCTTTA  
AAAAAAATTTATCTTTCTGATCTTCTTACTATGGGAATGTGAGCAAGTTA  
TTTAAATTCCCAAGATTCCATTTCCCATATATAAAGAGAGGATTAACCT  
CATAGATTTTTATTAGGTTTTTAAAGAAGATATATTTGAAACCCAGCAAAT  
TCTTTGGTACATACTATAGGGACTCGATATCTAGAAGTAGTTACTGTTAG  
TCCAAAGTTCAGTGTGGCATAGTACATGTGTGCACATGTATGGTGGTGGT  
GGTGATATGTGTTTGTGTTGGGGTGGGTGGGGGCTTCTCCCTTTCCAAAT  
AATTGAGTTAGAACTACATTGTTTGTTCACATAAAATACTCTACCCCAAC  
CAGGAGCAAAAAAAAAAATTTTTTTTAAATAAAATAAAGAAAGCCCTATAC  
AATTA AAAACCAAAAAATTTGGCAAGATGGACCTGATCTGCAAGGAGAAAT  
GTGTTGCTCATGAAGTAAAAATTTGAAGAAAAGAAGAAGTGTGTGGCAGAA  
ACAAGTGAAAACTGAATTCACAAAATGTCCTTATATTCAATATCAAATA  
GTCCATTAAACTAACAACAAGAGCAGCAAAAAGATGTACAGAGAGGAGCA  
GCTGACCAAGAGCACTCAGCTGTGCTGGTCACAGCAAAATAGAGATCAGGA  
GACTCATAGGTGACAGCAGCAAGTGGAATCCCTGGGAGATACAGCAAGA  
ACTAGATGATGACATGGGATTTTCCCTTCCTGAGGTCTCTGTCTCAGAAT  
TCCCAACTCAACTTGATGCAGAAAAAAATTATAACCATGCTTTTCTTTTA  
TGCTTTCCATGTGGATAGAGTTCCAAAATCACATCATGGCAATGATACCA  
CTAATGCCTTGATTCAAATGAAGAATCTTCGAAAGGCAAGATCACTCAA  
CATTTTATCACCACATTCCTCCAAATAGGTATATTTCTGGGGCTCCAGG  
AAAACCGTCCTGTATCTGGCTTTAAATGAAGATTTAATTGCGACCAGGAA  
CTCATCTCAAGTGTCCATCTTTAAATTAAGATTGAAGTCATTGCCTTCTG  
AGGGTTGTTTTCAATTTTTGTGGGCAGAAGTGACTGGTCAGAGTACTGGA  
GAAATTGGAATGTCTGCTGGTAGTTCATCAAATAGTTGCCAGCCTAAATA  
TGACCCAAATTGTGTTTTCTTATTGAGGCTTCATTTGGGCCTAAGTCTTG  
TTCCAAGACCCTGGTCTTTTCGACAGGAAAGCTCTAGATGCCAAGTATCAG  
CAAGGAAACATAATTATTACTAAAATTGAAGCAGGTACTATGAAATCTTT  
TCATTTCAATTTGGAAATATAAGATGAAGAGTTTAAATATTAAC TCAATCA  
GTCAGTTTAAATTAGGTACAGTGTATTACAGTTAATAGCATTAAAGATCA  
CTAATACAGCTCCTTGAAAAACAAGCAAAGTATTATAGTTAGTCCAAGTA  
GACATATTCTACAACGATTTGATTATATTTATATGTTTTCTTGCAAAC TC  
CAGTGGTATTTCTCAAGATTTTTTAGGTGTCAACATATGGTTTCAATTTCT  
TCTGAAATATATAGCATAGCTTGTTCTCAGAGCAAATGCTGCCAAACAGG  
ACTTGTAATGTATCTTGAGGTAAACTTAACATCTCGTCCTTTCCCTATA  
GGGCTCCTTGACTAATGGCTGCATAACCACCTCAGATGGAAAATCACACC  
ATTACCCAAACGAGGTTTTCTCAACTGAAAAGGGAAATGCATTTCCCTTT  
CTTATGTCTACTAATCTATACTATCACACAAGTTTGGCCATCGAGAAGAT  
AAAAATATAGGCATGTTTAGCTACTTCATAGTTGCCAGTGATGATCAATT  
TTGTAACAAC TCAAAC TAAAGGGATTGGGATACACCATCAGTAAAGCAGA  
ATATTTTCCGTAGAAGGCATCTTTAAATGATTCTGAAAAATCCCTGGTCT  
GCTGTTGCTCCAAACACAGAAAGAGGAAAATTTTTTTACAGGGCTATATT  
TGATGTCTAATAAAAAATATTGCCAGAAATTGTGATAACTCTCATTTCCCTG  
ATGGAGCAAATATTGTATAGAATTGTTTAAATTTTAAGGTACATTTCAA  
TTCACTATTTGTGCACTTAATAACACATTCAAAGTTTTCTGTTTATCTTG  
TGTGTGTGTATGCATAGATATGTGTATATATGTATAAAACGTGTGTAT  
TTGTCTGTTTTTTTTTAAATACAAC TCAAGGATGTAAATTTACAAATTCAGT  
TTGACATGTGTATGTTTTGTCTATACTATAACCCGAATCCAAGTAGTGTA  
TGAATCCACTTTTTATTTTTTAACACCTCATAGACATTTCCCTATGTTATAA  
ATTCTCAGGGAACATGGAGTTGGGTGGTTTCATTGGCTTTGCACAGCGTT  
CATCCCTGTGAATATGTGTGTATCCACTGCTGATAAAGATGCAACATGG

CTCATATACAGAAAATATTTCAAACCTTTCGTTTTTATATTTGGGTAACAA  
GATGACAAAATTGGTGAGAAAAGGAAGGATTTTTGTCTCTGAAATTGTCT  
CCTAAGTTCCAAATGATTATCTTGAAGTCATAAACAATCCAGCAGTCCAT  
TAAACCGTATCTCTCAATTACTCACGATTTCCATGCTTGGCCACCTTCAC  
ACTATTACTGTTTTGTCTCATACCAAAGATGTTTATAAAAATATGTATAAA  
GAAACAGACTAAATAGAACAGGACAATGGTGTGCTTCAGTGAGAACAGAG  
CATGTTTCGGTGCATTTCCCTCAGCAACATTGGGAACATGTTGTAGGAAGA  
TTAAGACTCCAATTACTTTTTGTGAGTTTAATACTTTCTTTCTTTTGATTG  
TAAAAAATAAAAGAGATTATATGTAATAATGTTTAAAAATACATATAAAG  
GAAGACAATAAAATGAAAACCTGCCTAAGCCACTGCAGAGATGTGTAACC  
ACTTGTGTTTTCTGTCTATCTTAAATAAAAAATAGGCCTATAACCTACAGA  
ATTTCCCTTAAATATAAAAGATGGCTCAGACCCCCCTAAATTTCTTAGAGGT  
CCTGGTACCTTGTCTCTGATGCTTCCCTTGAGCAATAGCTCACATTTATT  
ATGAATGGCCTTTTTGGTGGCTGGATTTTGGGGCAGTGCTACAAAGGGACT  
TCAGGCCTCCCCAAATCTTTCTGTTATTAGTAACTGATTCCTCTGGGAT  
AACATTTAATTTATCCTCTAAACTGAAAATATTTTGAAGGGTTAGATAAC  
CAGTCAAAATTAACAACTAGGACTCACAGTATGTAGTGCATAATTGTAT  
GGTGTGTTGGTTCAGAGAATAGTCATAGGGAGAAAAGGCATTTGATGGAAGT  
TGGGTTGAGGTGGACAAGGGTGAGGACTATTAGGAACAGGTGCCTTTCTA  
TTATTTTTTGAGCGAGAGCACCAGAGAGAGATCAAGGTGGGTAAGGGGAAA  
GGGAGAAGCGTGAGGGGAGAGGGAGAAGGAGAATCTCCAGCAGCTTCCAT  
GCTCAGCACGGATCCCTATAGGAGCTCAATCTCACAACCCTGAGATCATG  
ATCTGAGCCAAAATCAAGAGTTGGTTGCTTAACCAAATGAACCATCCAGG  
TGCCCCAGGAACAGGTGCTTTTAAGAGCAAATCTATTGGGCACATGTGCT  
TCCTTCCACAACCTCAGAAGCACAGATTTATAGCTCTTTCTGACATTTAAG  
AAGCAATTGTTATTCTAAAGAAGCTGCACTTTGCTGGGTTAGCCACCCAG  
GTGCTGGAGCTGCGCTAGAATTCGATTCTCTCACTTCACAGCTGTGTGC  
CCTGGGCACATTTACCAAACCTTGTCTGTGTTTTCATCTGTGAAATGGGA  
ATTATCATCCCTAGTGGCATATGACTATCAAGAGGAGTCCATGAGGCAAT  
TAATGGGGACTCTTATGGAAGTGTCTGGGATATAGGAAGCGCTGCCTAAG  
TATTGGCTCTTGAGAATGCAACTCTATCTAGAGGGAGATGGATGAACGCA  
AGGAGGCCTTGCCCTTGAAGAGCTCACGTCCAAAGCATGGATCTGGTCCG  
TCTCATCTGCTAACTTCAACTAAGAATTCTGAGGTTTTAATTCAAGTTCA  
GAGAAAAAAGGAGCACCTGGTGTGCAGAAGAGGGTATTATCATCGTATCG  
CGCATTTTCATGACTTTCCCTACTAAGATGAAGGAAAAACAAAATCAACAT  
TTTCATGAGTTATTTTTACAACCTAATGATCTCCCTTAAACATAAGTGC  
ATGGCCTAATGTAACGTAATACTCTTTCATTTCATAAAGTTTATGTATTTG  
AGTTACTTGCAGTGAACATTCATACAACAATTTGTTTCATTTTTGACATA  
TTTTCTACCCTCAAACCACTGTGTTCTTCCATTTTCATAAAAAGGAATAGA  
GAAATCATAAAGAAGACATAAGAAAAAAGAAACAATAATTAAGAAGTGA  
TGATTGTATTTTGAAGAAGGACCAGCTTTTGTAGATGCATCTGTTTCT  
TACTTGGCTCCCTAAAGTTCTGTTTCATCACGTATTTTCGCTGCAAAAGTAC  
TTGGCTTTATAATGATTTGAAAGCCTGTTTCTGTTTGCTCAATCTGCCA  
CAAGCAAACGGAGGCAAACAAATGCTTGGTAAATGAAGAATGATCAAAAT  
GGCCTAATACATCAGCCTAGCCAATAACAGATGTCCTCTCTGGATAGCCA  
TTTACAAAATTACTGACAATGCAAATCATGATCAGAAAAACAAATCTGTA  
AGGTACAATTCTTTTAACTTAAATTAATCATACATAAATCTGTAGAGTTA  
GCTGGCCTTGAATATATGCCCATATATGCACATCTTTATCAATCTTCATG  
TACATCTCTGTATTTTCAATTTCCAAATACGTAAACATCTGCTGGAACATA  
CCCTTCTCAGTGTACTTGTAGTTATAGCAAAAAGCTTGACTTTAGGGGCTT  
ATAAAAAAATCCTCTTTTCAAAAAAACAACAAAACAAAACAA  
AACATTGAAAGTGGAATAATTTACCACAAAATTAATATTTACATAAATG  
GATTTTCTCTATATATAACTAAACGGTCACATCAATCATTTGAAACTTAA  
AATGTATTCTTTAACTCCAACAACACTACATTCCTTATTCAAAATTTATAAT  
TTGTAGCTAATTCATTAGCAATATTTCTCCTAGTTGAGCAAAATAATAGA  
AACATAACATTTACTTTACTCCTAAGATACAGATATTAGAATTTAAATCT  
GATTTCTAGTAAATGTATTTAATAATTTAAAAGTTATTTTGGGGAAAAAT  
ATGTTATATGGGTTTTTATAGAGATAAAGTTAACTAGATGTGGTCTTTGGAG

CCTTAATTAGAAGGATATAGTTCTGAAATATGTCCCTTGTTTAATGTACC  
AGAACCAAAGTGTAGAAACACTTTAACAGATTGTCATACAAATTAGCTCC  
ATTTAAAACGTGTTTTCATTAATTTCTTCTGATTTTCTAGTTTGTAGACAT  
CCCCAAAAGAGCAGAGAAAATCAGGGGACAGAATGTGTGTAATTTCAATCT  
GAAGTTAAGTACTGTTAATATTAAAGTGCATTTTTTTATTTTTTAATAATA  
AATTTATTTTTTATTGGTGTTC AATTTGCCAACATACAGAATAACACCCAG  
TGCTCATCCCGTCAAGTGCCTCCCTCAGTGCCCGCCACCAAGTCACCCCC  
ATCCCCCGCCCTCCTCCCCCTTTCACCACCCCTAGTTTCGTTTCCCAGAGTT  
AGGAGTCTTGCAAGTTCTGTCTCCCTTTCTGATATTTCTTACCCATTTTTT  
AAAAATTTTTTATTTATTTATTCATGAGAGACACACACACACAGAGGCA  
GAGACACAGGCAGAGAGAGAAGCAGGCTGCATGCAGGGAGCCTGATTTGG  
GACTAGATTCTGGGTCTCCAGGACCACACCCTGGGCTGAAGGCAGCACTA  
AACAGCTGAGCCACCCAGGCTGCCCAGCACATTTCTTTTTTAAGTAATTT  
AGTAATTTGTGATTTTACATGATCAACATTACACTGTATATAATTCCCATG  
ATACTTTTATTTCTTAACTCTGTAATATAAGCAATTTCTTATGTCATCT  
AAACCAAGAGATGAAAATGAGCTTTGAAAATTGGACTCTAATGGCCATCT  
AATTTCCAATGGTCTGTAATTGGAGTCCGCCAACCTTTTTTATGAAAGACC  
AGGTAGTCAAGATGTTTGGTATTGAGAACCAGTGGTCTTTTTCCCAACTA  
CTTAGCTCTGCTCTTGCAAGTCCAAAGCAGACTGACTATGGGCAAACAAA  
TGGGTGTGGCTGTTTCCAATACAACTTTATTTATGGTTATTAAATTTTGA  
ATTTTCATGGAATATGTACATGTCACAAAACATAATTCTTCTTTTCATGTT  
TTTTCTCAACCATTTAAAAATGTAAAAACCATCCTTAACTCCTAGGCAAA  
ATAAACAGGAGGCCAGCTGAATTTGGCATCAGATCTTAGTTTGATGATCC  
CTGGTTTATAGTTTCTTTAACTTACGATATCTCTGAGTCTCTCCTAGGGA  
AGCTATGATTCTGTTTACCTGTTTGGATTCCATATTGGACCTTTTTATAA  
TATCTGAAAAGAGTGCCAGCAGTTACTTGACTTTTAAATGGAAACATTTAA  
CCAAC TGAGAGATTTTGTGTAAAGGGCTTCTAGAAATTCATTCTAAACTG  
GGCATCTCCACACTCTAAATCCAAGCTGATGTAGAGGAGGAAACATTTT  
CCTCAACCTTCTTAGGGTTGCTTCTGGCTGGGTGTGCAAATTAACTGA  
CAAAGACAGTTTAAACATTTTTTTTTTAAAGCATAACATTTATTTAAGTT  
TTATGTGACCTGGAGCCTCCATAAGGAAATGAAGACCCCAAAGAAACATT  
AAGACCTGTGCACTTTAAATGCTAGGTGTGATGAGTGGAAGTTCTAGAGA  
AATACAGGTTAAGGAGTATGAAGTAATGGTAGTAAACTGGGGAAAAGTCA  
GTGAGGCCTTTTGTTC A AATCTGCTTGAGATCCCTTTGTTCTCAGAGAT  
AAGGATGCTCCTTTCTGGGGATATAGGGTGGCACCTCTCTCATGAATGT  
TTTATGACCTGCTTCAGGACAGAAAAGCAAGCAGGCAAGGAGGTCAGAGT  
AACCTGCCTGTTTCTGCCATTTTTTCAAACACCTTCAACTTGAAATATTC  
AATATGCCAAGGTGCCATATTTGGGGTAGCATGTCTGAACCCTATCCC  
GAATTTATGGAACGTTTGAAATAGTTTGCTTTCTTACCAGTGATTGTAAT  
TTGTCATTGTTCTTTCAAATGGTTACTTTCAA AATGATGACAGGTGATTA  
AAAAAAAAAAAAAGATATGCTGCCATTTGTGAGAAATACTTCTTAAGGTG  
AGAAAAAAGGAAAAATACTAAAAAAAGGAAAGCTACTGTGTGAGAAAAAT  
CAACAAAGGCACCATGAATATGCCTTCCCTTCAAACATCAGGTCTGAGA  
GGGCTCCAAAGGAGCGTTCTAACTTGGGAAAGGAGGCCAGAACCCTCTGT  
AGGGCAGGTGGTGCCTTCCAGGAACAATTTTCTGGAATGGTTGGTCAAGG  
ATGGTCCATCAGAAAGGAAGAATTGTTCCATATGAATTAACAGCCACTGTT  
TGGGCAATTTGGATTTTATTAAAAAGGATGGGGAAGAGGTGGGGCTACTG  
TCAGGTGTAAGAGGGGATGAGGAGAAATGATGGGGTTGGGGAGACACGCA  
TAGGGCTATGGGTGGAAAATTCACTGTCACACTGCACTAGTGACCTATTAC  
AGAGTACTTAAATTAGA ACTATACCTTATAAAGAGGCCATTTGCTAGAGT  
CTGTATCACGTTTTCTTCTACTTCCACAATGCTAAAAACAGGATTACTGT  
GTGGGCTTAATTACTATAAGAAAGTTATTGTTAAATTCTCTACTGATTAT  
ATTTAACAGGTGGATGCAGTAAATTCAGCCGCAATCAGATCCATGATGCA  
GAAATGTGTCATTAAAAATCCTCAAATAAGGCGCGGGTTGAGCAATATTC  
AACAGACCAATTATTTTCTCAAAGCAATTAAATAACAATAACAATATTA  
GCTTTTCCTAGAATGAATGATGATCATATGACAGGAACATTATCTTATGA  
CAGAGCATGAGCTAGGTATTATAATCTTTTTTTTTTTTAAAGATTGTATTT  
ATTTATTTGACAGAGAGTAGAGCACAAGCAGGAGGAGTGGCAGGGAGAGG

GAGGGAAAGAAACATGGGGCTGGATCCCAGGACCCCAGGATCATGACATG  
AGCTGAAGGCCGAGATTTAGCAAGTGAGCCACGCAGGCACTCCATTATAA  
TCTTGATTTTTAAAAATGAAGCTGCCAAAACCTTAGAGATTTTAAGCAACAT  
AGATCACATAGCCAATGGAAGTGAGCATCTGAACTCGGGCAGCCTTGTGC  
CTACCATATCCTTAACTATTAGGCCACAGAGATAAAGACTCGATTATTGA  
CGACGCGGCTTAAAACTAATTACAGATCATTTCTGCAGAATTCATTCTCT  
GGGGAATTTTATTTCTAGAAAAATAATTGGCAAAACGACCTACAATAGT  
GACCGCTTCTCAGTGTATATAAGGACCGCGTTAGTGATTGCACCATGCAA  
TTTCACTGGTCCCTGCAATATGCCCAAAAGTGATGATTCAATCTTGTTA  
GAGAAAATCAGTCCTCAAGAGAAGATTCATGGGCAGAACCCAGTCACTCT  
TCTTTTTTCCTCCAGAATTAAGAGCCAACTCTAACATGTTCTTTTAGATT  
TCCTAAAAGGAAGGGGGGAATAATGACCCAGGAGAGCACACTGAGACAAC  
ACAATTTGCATATCTTAACAGCCTCCCATGGTGCCCTGCAAATGGAGAAC  
AGTTGAAGGATATAGAGTTTCTTTTACACAGCATAACCAGCGGAAATGAC  
CACTGATGTTAATTTGAAACAGAATGAGACAGCTACACTGAGGTGCCTTG  
AGGAAGTATACAAAGAGAGCCTTCTCTCTTGACAGAGGTGCTGACATTGG  
GTGAGTCCATCCTGCGCAGCTGATGGTAGGAAGGGCACATCCTGAAATCT  
CAACACCTGGATAGAGCTCGGGAGATTTTGAAAGAAAAGCTAGACAGACGG  
TTTCTCATAATGACACTGCAAAAATCCCAAAGGCATCTGCAGCTGGCTCG  
CTTAGAATCTGAGTTAAAAAAGAGACACAACCTTTTTTTC  
TAGAAAGGCTCATTTATCCATGTAAACAAAGTTAAGCTACTTAATAAATC  
CTTTCTAAGTTCCCATTTGGGGTAGACCTATTTTGTCTTTACGGCTCTTT  
CTGGGGGCTCGGAAATTCTTGGTTGTCATCAACCTGCTTTAATCCCAAGC  
ACAGCCCCAGAACAGAGAAGCGTCCGTTTCATATTGAAAGCAACTGAACAA  
TCTTTGCAGAATTTGATTTTCTATTTGTTTTCCCCCATTAATAATATCA  
TCTCCCCCAATCCATATGCAATTCAAAGGGAATTCAGTGGGAATTTTG  
TGGGTTAGCGTTTAATAAGACATGTGACCGATCCACTTTTCTGTAACCGT  
GACACCAATATCAATCTGTTTGCTTTCCCAAATAATCAGTTTCAGCGTAT  
CATTAACGGTCTCGAAGATGAGTGATTAATGCACTGGGTCAGGGAAAAA  
GAAAACACTCTTTCCTCAGGGATGAGAGGCATCCAGTAGAAAAGGGGAA  
CTCAGGACTTCAAGCATGAGCTGCTTTTCCCTAACCTGTAGAGCAGTGAC  
ATATAGCTTCTTAGTGACAGAATTGACGTGAGGTTAAACAGAATGAAAA  
CGATATAAAACCATCATGTGAGTGTACAGTGCAAGGCCATTTGTTACAAG  
ATAATTTATTATTACAGGTTTCAGATACACTGCCTTGACGCCACCTTGAAA  
CCTTCTTAGAACACAGTGAGATCAGAATAAATAATGAATAGAACATAGC  
TCCCTCTGGCTGTATCGTGAATTCCTAGCCTACATAATTTATGCACAGTG  
AAAGACTAAAGAAAAAAAAAATCAAACAGAAAATGTCTGGCTCTCACCT  
GGAAGACTTTATAACTTGTTTTAGGATTAAATGATACACTGGTGCAATGA  
ATAGTCATACACAGACACACATACACACACACAAAATCTCTATCTCTAG  
CTAAGAAAATGGAACGTCCACATCAGAAGCAAGGAAATTTTTCAGAGAAA  
AGAAGTATCTCTCTGCGAGACCTCACAAACCCAGAAAACCTAGTCCGACCC  
TCAAAGTGGGCTGTAACCTGTGTGACAAGGAGGAACTAGAGAGAGGTCC  
AGAGAAGAAATCTTTGTGAGATAAGACTTCATAAAAATGCCCTACCTCTG  
GGAGATAAAAGTGCCAATTACATGCTTATGATTTATTTGATTTTATTTGG  
TTTCCATAGAGAGGCCACTCTTGGTTTTGTTTTTTTGTGTTGTTTTTTT  
TTCTTGCGTCAATTGAGCAATGCAGTTGACATAGAACATTGTGTAGACTG  
AAGTCACACAAGGTGTTGACCTGATACACTTACATGTGGCAAGGTTATGA  
TACCCTGTTGTTAGTCAACTCTCACTACCCTTCTTTTCTGTGATGATA  
CCATTTAAGATCAATCCTCAAGAGGCCACTCTTAAACATCTATGTATAT  
GAACAAATCTAAAACTGGTGTAATTCACATGTTCAAGTGTGAAAGGG  
AACGCCAGCTCACCTCAAGTGCCAAGTGCAGAGTGAGGCTTTGACTCTGA  
CTCCCTTCGCATATTACCTGTTGATGGGAAATGGTACCACCAGGTCCCT  
CAAGAGTCTCCTGCTTTCTCGGAGATGCACCCTCCAGTAGCCCCCTTCCAC  
GTGTGGCACTGAAAGGCCCTTCCCTGGAGCCCAGCCAACACCTGCTCAGAGA  
AGGAAGTAACGACACAAGTGAGGGTCGCCGAATGACGCGGACAATTCTTA  
GGATCTTTGTATAACCTAAGAGTTTAAATTTATCAACTATGACAAAATAG  
TTTTGGGGGCTGAAATGGGGGGGAAAAAACCCTAATTAAATGGTAAAA  
TGTGTTAGTAGGCTGTGAATTAGACAAAATTATGCTGCCACCTCTGTCTG

GCTAAAAATCGAATCATGGAATTACCGTGGTGCAAAAAGTGAGGACATTA  
ACGTTTAATTGCTTGGCTAAAAGAAAATGCCACAGCACGGGGGAAATAAA  
ACTTCACCAAATAAGGATTAGATTAAAACTGGGAGCCATCACCCATGGCT  
TCAGTGGCTCCTGTGAGCTCCGACAGCTTTCGAATTGCTTAAATAGTTAG  
AAAGGTGACTGTAACATTGACCAGCAAATGACATAAAATCCAGAATTAATT  
ATAAAGGCTTACATAAGCAAAAAGAAAGGGGCTCGCTGGATCCAGGCTTA  
TTGTGAGATGTCAGCATAATGAAATTTTAATCAGTTTGTTTATTTAAGGA  
AGAATTAATTGCATATCATATTGCAGAAAATATAGTGCAGTTGTAAAGTT  
ACCTGACTTCAGATCTTATGTAAGTGGATCAGTTGTATCTTAATTTTCTT  
GGGCAATTTATATAGTTTTGGGGGTTTATCAGGCCTGTGTTTCAGCTTGTC  
ATATTCAGTCAAATTAAGTGATGCTTATGAGATCTTTCAAGGGGCTCTT  
TCATTTTTTTTAGGGAAATGCCCCCTTCTTTGCCATCCCCACGCCTCCTGAA  
ATGTCATTCTTCCACCTACTATGGAGTAAGTTATTTATGGATTGTTTTTA  
ATTTATGAAGTGGTGAGGGGTGCCATAGTTAGCTGGATGCCCCCATGAAG  
TCCTACAGATCAATGGTGAAGCCATCCATTTACCAATTGACTTTTAACCC  
TCTCTAGCTGACAAAACAGGATTTATGTTTCATGCAAAAGAAAATGAGCTAA  
ACCTTTGAATATAACCGGGTTTTTGTGTGCAACCTGAGTGTACTGCCCCCT  
GAAAAACACCTATTTCTTAGAAATAGAGAGTGGATTGGAGCTAGCACTTG  
CCACAGAAGAAACCATAGGGCTTTGATGTTCAAAGTCAGAATATCCATTT  
TTATTGTGCTTCATGCAATTTCCAGATCAGTTTCCATCAGTGAATAACT  
GTCTTATATACACATTATAGCCTATCATAGTACTAAGAGTTTCTTAGCTA  
CAAAAATGTATTTCCCTTTTGGCGTTTATCCTGGAATTCAGTATAAATAAC  
ATAACCGAAAATGGGATAGAGTAAAAGATCTTTGCTTCAGGAGGACAGAT  
TTCTATATATGACATTAGTTACTATTACATAGATTATTTGGGTAAAGATT  
TATTGAAACCTCCAAATCCACCCATCAGTGTACCAATAGTGCTTTGTGA  
GGAGTCCAAGCCTGCATATTATTAGCGTATTTTCATTGAGTGCTTAGTAGA  
TGCGAGGCACCATTTGTTAAGGGCTTGATGTAGACTCTTCTTGCTGTCTCCT  
GGTAATGTTATGAGTTAAGCATTATAATTATTATCCAAATTATAAAGAGG  
GAGAACTGAGGCTCAAACCTGCCAAATCACACTGTGCTGGTACAACCTGTT  
AAGAAGTGGTATACCGTAATAATCATGTTTTTTGATTTTCTCTATTTTAG  
GATGCTTTCACATCTTGGAACCTTACAAACCCCAGGAGGGAAGAGACTGG  
ACTTCCAGGGTCAGCTAATTCCTAGAGACCTCAATCAACTTGCCCTTGAG  
CACAGTTTTGAGATGCAAACCAGACAATTCAGAGTTCAATCACCTTCTTT  
GTCAACTTCTCACTGACCAAGCTATTGTTCTTTCTGCTTTTAATCACCTC  
AGGGCCAGGTTTGGAACAACCTTGAGACCACCTCTATAGGCCAGAGTCGGC  
CAGAAGTTGTTTTCAAACGGTCCAATCCTAAACCTGTTCAGCTGCTTACCT  
TGCCCTCACTCCTTCCTTCCTGCTAAACTCACAAATAAAAGCTCTGGTCCAC  
ACTTCTCTATACTCCCTCAGCCTCCAGACTGACCTTGGTACTTTCCTGT  
GTGGACCTGTAGCAGCCAAGGGCAGGCTGCCTCACAATGGGTCACTTTGT  
CATGAAAATTATTTTGAGTTAAAAAGCAATCAAAACCCAGGAGATTTAGG  
AAAAGCACTTAACCTGCCCCCTCAAATGCCTAAAATAATTTATATAGAAGA  
CCTGCTCCAGGAATGGAACATATCATCGGAGCTATCACCATGGACAACCTAC  
ATTGGGTTGTAAAGCTAGGCAGGGTTAATAGGGAGGAAGCTTGCGAGGCCT  
GTTTGATCAAAGTCTCTCTTTTCCAATCGTTTCAGACCTTGAGGGAACA  
GAAAATTCCTTGCTTCCCTCACAGTCCATGTAGAGTGATGCTTGTTCCCTC  
ATCTGGGGAACCTGTAGTAACAACTATCTTTTCACCAATAACCATCTTC  
TGATCTCTTGGCCTCACCATACCTGACTAGGAACAAAATCCTGGCACATT  
ATAAAACACGTGCCAAGGGTTGAGTCAAAGTCCTTTGACTGCATAAACTC  
CCCTCACTGCTTTTCAAACCCAAGGGTGGTCTTCTTCTCCTCTTTACTT  
TCAATTTTAAATAATAAGCTTTACAGGAAATCACAAAGAAATGTACA  
AGGAGCTCTTATGTGCCTTCCACCCAGCTCCACCAATGGCCACACCTTGT  
GCAACTAGAAATTCAGTATCACAACTAAGACATTGACATTGGTACAATCCA  
CACACATATTTTAGACTTACCCACTCATGTGTATGTGTGTATAGCTCTG  
CGCAATCTTATCACATGTATAGTTTCTCTTGCTGCCACCGAAATCAAGGT  
GCTCAATTATAGCATCATCACAAAGCTTTCTGCAATAACTTATTTATAGT  
TACACCTACACCTCCCATTCCTAACCCAGGCAACAATTAATCTATTCTT  
CACAGATGTTGTATGCATGGAATCATGCAGTGTATATCCTGAGATTTGTG  
CTTTTTCTTCCCCTCCGAATTATTTCTTGGAGATTAATACAAGTTCTTGC

ACTTACTCCTTTTTATTGCTGAGTAGGATTCAATAGTATGGGTTCCACCAC  
AGTTTGCTTAGCTATTCATCCACTGAAGGACATCTGGATAGTTTCCAGAG  
TAAAACTGGGATGGATAAAGCTATGAACATTTATGCGCAAGTTTCTGTAT  
GATACGTCGATGGCTTCCAGTGAAACACACTTCCCCGACATGCTCACCCCTC  
ACGTTGTCCTCTCCCCCTCAAATATGGGTTGGCCCAGTGAATCATATTAA  
CCAGTAGAAGTGACACTGTGCCAATTCTGAGCCTAAAGCTTAGGAAGTTT  
TGCTCTGGCCCTTTTGGAAGTTAACTACCCTGAGAACCCAGTCCTATAAG  
GAAACCCAAGCTAACCACACAGAGAGGCCTGGGGGTGGGGGGGACAGCAG  
GGGAAGAATCAAGAAATCTAGGCAGAAGTGTGAACCAAGGCTACTGGCCA  
ACCCATACATCTGCGTTCCAGCAAACCATCATCATCAACCTTCCAGCCAT  
GTGAGTTAGCCTGCTTGGGAGTGTAGCCTTAAGCCACCCCCACAACCCCC  
ACCCCTACCTATGCCACTGAAGAACATGAGCTACGCTTCCAAAGCACTGA  
TCAAAAAGGCAGAATTGTGGCAGATAAATAAAGTGGTTATTATTTTAAACC  
ACTAAGTTGTTAGTAAGTTTCGTCCTACCAAAAACTATACATAACAATACA  
TAATTAGAGCGGAAATACACATCCTACTTTAACTAGGTCCTGGACCTAGT  
TAACATATTAGTTCTTTCATTAATTTGCTAAAATCCCAGGATATTATTTTA  
AGTAAATGTAGTTATCAACCATACAGATTTAAATAGGTAATAGGCAACAA  
TGCGTATTTTATATAATGTAAACATGTAGTGTATTTGGATATTCTAGAAA  
TGCTCTGGATCTGGAGTCACAGATCAACAATCAATCCCCAGCTCTATCCC  
TAACATGCTTTGAAATACCACATGCCATGAACAACCTGTTAGGATCAGACA  
AAAGAATTGATCTAAAGTTATTTTCGTATGCTGTAAGACATCAAAGTATTT  
TGTAGTGGCTCACAATCGATTTCAGTTGTTGATTGATAAATGGGTACAAAG  
AAAAACACAGGTGCTGATTATAGTTTAAATAACACTGAATTAAAAAAAAAAT  
AAATAAAGAACACTGAATTTAGCCCACCATCACCTTTATTATCAAACCTCT  
CACAGTATGTTTCAGACATTATACAAAGTATACTATTATACTTTTATTAAT  
TTATGCAAAACCCCATGACTTTTAATAAATTGAACATATAATTAACCTCA  
CATGAAAGCAGAAGTGACTAGTAATAATGTAGCTAATTTGAATTAGACAA  
AGAATCACATTTTATTTTATTTTCATAACTTTACATAACGACTACCACAGC  
AGAGAGGGGAGAGAATAATTAAGCTCGCGTGCCCAAAATACATCTATCGAT  
GAGTTTCAATCATCTTCTCTTTGCTCTTTTTCTGCCCCAAAAAAAAAAAA  
AAACCAAAAAAAAAAATTACGACTTGACAGCATCTGATGTAGTGGCAGACA  
TACACTTTGCAAATTTTTGTTTGTTCCTAAGCTATTTTGGCTTTCTTTC  
GTCATTGAGTCCAAATTAAGTGTGGTTAATGTGGTTACATTTTACTGGA  
GCTACTAAAATAAGGTTACATAAAGCAGAAAATGGAAATAAAAGTTTACA  
ACAAGCTTCATTCTGCTTTCTTCTTTGAAGCTCAGTGGAAAGTATGAGA  
GCATTGCACATTCAAGGCTTTGCATATTATTAAACTAAAAAAAATTATAA  
AGAACATGACAAGCTGAAAGGAAAAAGAAGCACACAAGCCAGTACAAATT  
CTAGCTGTTGATCATTTCCCCTTCATGATATTCCCCTTCATGGTCCATGG  
AGAAAAGCATCACAAATTCTGCCTAATACCATGTTTCCCTAATGTCCCAA  
ACCTGGAAAATTTAAAAAAGTGAGTTTCTTTGGGTTTATGCTGCACTAGA  
TAATCAATTTGTGGCCGATGTTTTCTCCTCACCTAATTTCTCAGTTGTTTT  
GGAATTCATCAAATGTGTTTCGCTAGTACTCAAAGTAGATCAAAGCAGGT  
CAGTGACAAAAACACAAATGGAAACATTTGGTCCCAGTTAGTATGAAATTC  
ATTTTCAGAAAAATATGGTCACAAAAACTAGGTGAATGAGGAAAGACACTA  
AGGAAATGAACAGGCTTCCAGGTATACATTATTTGGAGGAATTCCTCAAT  
CGTAGGCTTCCATGGTGAGGACTATTTCTCTTCTACCCAGCATTCTTCTG  
ACAAATGACACAGTTTAAAGTTGTTTTGCTAGTTGAGATCTCAGTCTGCC  
ACTTAAACATCTCAGAGGATTTTGTCCATTTCCCCTAATTGTAAAAGT  
GAGATTGTAATAGAGAGAAGTTGAAAAAATTATTTGAATCTGAATTTTAA  
AAAAAATTCAAATTCATTGTTTCAGTTGAGAGTATGTTGCAAATGGTTCAT  
TCATGGAAAGTGCCTAATAACACACCTATCCTACCCTGTGTTAAGCTAGCC  
ACCTTCTGAATATATAAATTTGATCAAATTATAAAAAGCTAAGTATAGAAA  
TAATCAAATATGCTTATCGCTTTGACCAAAAGGATGCTTCTCTGATGGCA  
CATGATTAGGCACGGATGCAAGACCCTGGTGGTTACAATAAGTATTTGAT  
GAATTGCTTAAATTCCTCAAATTATTTTATTCATTTTTTACAAATGTGGGC  
ATCACCCTACATCATAGGTTCTCCAATTGTAACAAAAAAGATATGTCT  
TAAATAACTGTATTAAAAAAAATTGGGGGCACCTGGATGGCTCAGTGGG  
TTAAGCATCTGCCTTTGGCTCAGGTCATGATCCCAGGGTCCTGGGATGGA

GCCCAGGATAGAGCCTGGGATTGAGCCCTGGATGCAGCTCCCTCCATGAA  
GCCCCAGATGGAGCCCAGCTTCATCCTGCTGGGCAGGGAGCCTGCTTCTG  
CTGCTTTTCCTTGCTAGTGCTCTCTCACTTTCTCTCAAATAAAATAACAAA  
TAAATCTTTTAAAAATTTTCAAATAGTAGTGAAATTAAGAAGGGAATACT  
TTACTCTTAAATTTCTCTAATATTTTCATTTACAGATCCACACCTCTAATA  
GATTCTGAGTATAAATCTTTGATCTTAAAAAATTTTCATCTAGATTTTAGA  
TATACATTTAAGGGTGGTCTAGATCTCTCTTTGATCATAGGCTCTTAAGT  
TACTAAGTGCTGTATACACAATATTAAATACAGTATATTAGAGCAGAGAG  
TGGATATGAGTATTTGGCAACTAACTAGTCAAACCTTCAGATATGTTTATT  
TAATTTAATAAAAAGTGTAGTTGGAGGAAGAAAGCAACTTTTGAAGAGC  
AAAGCTATTTTGGATTAACTTTCTAAAACTTCAAAAAATTAGTTGTAGT  
ATTTTCCTATGTTGCTTTTAGCCTTAAATATTATGGCAACAGAATCTTTT  
CCATCCCTCAAATTTGTCAAAAAACAAAACTAAAAACAAGCAACCAATCAA  
ACAAAACAAAAGTACTCACCTGTATTTTCTTCTAATCCTTTAGTATTTTTG  
TTTTCTACCATTTAAATTATTATTTTCACCTGGGACTTAACTTTATGTAAC  
TTAAGTTTTATTTCATATTTTAAACCAGTTTTCCCTAACTCTATAATCAAAT  
AAAAATGCTATTTCCGCAGTGCTTTTGAAATGCCACTCTTACTAAAACTA  
CTTCCCTGCATCTAATCTCTCTCTGACCTCACCCATCTTTTCAGACCATT  
TCATACTGGAGCCATTGCTGCAGCTCTCTGTGGACTCAGATCTGAGGGTA  
GTTTGTCTCCTCTGAAAACAAATCTCTCCTTTTCAGCCCCAGGACTTCCT  
CCACCACAGTGGCATAGGACGCATGGTGAAACTACTCAGCCACTAGGACA  
CACACGCAAATCTGTAGGTATAAGTGAATAGTACCCTTGACCAAGGACAA  
CCCCTGATCAGTGTGTGGGACAGGAGACCAGATGATACACTACTTTTCTG  
GCTTCGTCACTGACAAAGATGTATTGTACATGGCTCCTCAGAGTATCCCC  
AGTGGGACCAGTTCCGGCTGCCCATTTGAGTTATCAGCCAAATAATGCTA  
TATTGGCTTTGCCTCTTTCTTGTTCATCTTCCAAGTCTCCAGCTCCT  
ATCCCTTGGGATAATTCTTGCATGCAATAAATTATCTGGATGCAGTAAT  
TTGTTTTAAACTGATTTTAAAGCAAACCAAAGGGGCACCTGGGTGGATCA  
GTGGTTGAGTGTCTACCTTTGGCTCAGGGCGTGATCCAGAGTCCTGGGA  
TTGAGTCCCACATCAGGCTCCCTGCAGGGAACCTGTTTCTCCATCTGCCT  
ATGTCTCTGTCTCTGTCTCTCCACCAGTGTCTCTCATGAATAAATAAAAG  
TCTTAAAAAATAAACAAGCTAAGAAAACCATCATTTATTCTTGATTCT  
TGTTTCTTGACCTGATTCTGTACCATTAAACTGTCTTTCATGGCTTTAT  
AACATATTTGAATACCTGTAAAGGTAATTGTACATACTATACTTTATT  
TGAAAATTACCCTGGTTGCTCTAGTGACTTATCTTTTTTCAGATTAATTTT  
GAACCATTTAAACAACCTCCAAAGTCGCATTTCATTTTTCAAATTGGAACT  
AATTTATTTCTCTCCAATTTTCATATCCCTCTAATTATCAGCTGTATGGAT  
TTGTGGGGTTATTTTTCTTAATGCCCCCATATCCTCTTTTACGAGTTAAA  
GGAAATAATTCTTCTTCACTGAGTTGATATGAATAATAATCAGGTTATA  
CACACACATATTAATAATTACACAGTTGCTGACATTTAGTATACCCTAAA  
CATTCACAATGGATTATATATATTCTGATATCACAATAATATTAAATCTC  
CTAATCTATAAAGATAGCATATTGTTTCATGACTGAAAGGAAACCTCATA  
TTCCACAGTAAAATCTAGTATTTTCTTTTTATAGTCCTATATTTTTTCT  
GTAAAACTTTTCTATGATTTTTTGGGGTATATTTTAATGACAATTTTGGAT  
GAGATAATATTAATGTCAATTTCCATCTAATTAAAATGAAAATGTTATGT  
TTATTCAGCTGTGCTTAATGCTTTGTATATGCTACATCAATTATTTATTC  
TTATAACAGTTGTTTGAGATGAGAACTATTATTAGTTCTATTTTACAGAT  
AAAGAAAAAGACACAGAAAAGTTGAATATTATCCCCCAGCTAGTAAAGAA  
CTAATTCCAAATTTGAGTTCAAGGCTAATCTTGATCTTATAAGAAAACAAT  
TGATCATTTCTATATTGTTTATAACAAGTGACCAACAACCTTACATTTGT  
TATATATACTTATTTTTGTTTAGTTCACTTGCTTTTTTAAAAAGATAATCAT  
ATTAATTCTAGTTACTGATATCTTCTTTCTAATATTTATCTTTGTAATGA  
TTTTCTGAACAAATAGAGCTTCGATGAATTAAAAGCAATACATTTTCTAA  
CTCATATTTTCATGTTGTTAACAGAAATAAAAGACAAATGTTCTAGGGAGA  
GAGTACCTCCCCATTTCTAAATCTAAAATATTTTGCTAAATCTGTTTGCC  
AAACCCTGAACACCTAAGAGTTCCCCCATCTTTTCTTTAAAAATAAGATA  
CCGCCACCACCATATAATTGTCCCAACCTCATCTTGTTAGACATTTTCTGA  
TGCTTGGCTTGGAAGGCCAACTCTAAGATACTCAGGAGCATATGGCAGG

GAAAGGTGTTTGGGATCAGGTTAACCACCTTTCCCACCCAGGACACCACA  
TTTGGCTCACAGTTCCCTCCAGATGCTTCACACAAACCAAAGGACAGGT  
CTGGAGTCCAAGTTCTGAGAGAGCAGCTTAATTTCCAAAGGGCACATGAC  
TAAGAGGTAACCTGAATTTTCCAGTAAGTCCTTTGCCTTCTTTTCCCTTC  
AAATTCATAGACGGCAATATTGAAATTGAGGCCCTGCATGGTGATAGCTC  
CTTCCCAGATGAACTTGTTTATTCACAAGACCCAAGGCATTGAGCCAACA  
GACTGATTCTCAGACAGTCTCCACATTCCTCCTATGAGCCAGGGAGAGC  
AAAGAACAGCACCCATGTGTAAAGAAGGAGCAGATCTGACCTCAAAAGCA  
AGCCAGATGAAAGTGAGAAATGACATCAGCAAGAGAAAAATTGCAATAATT  
CATCAAAGTCATTCCATGGTTGTTTTATTGAATGGTTTTCCCAGGTGACT  
GATTTGTGTCCATTCTATAAGATTTCAGATATCAGGACCTTTGCAACTCATT  
TGCTCCATGTTCTAGCATATTTCTTGAAGCTCTTTCTCAAACCTGGTGAT  
AAGTGTTTCTACAGCCTCAAGAAGGTTAAATGAGTCTATGTAGGGTTTTT  
GAAAGGAGGAAAAAATATTGTTTGCTCTCATTAAACTTTGTTGAGAGCC  
ACAGGACAAAAATGATTTTATGGTAACCTCTCCCCACTTAAAAAAAAAAAA  
AAAAAAAAAAAAAAGCCCCACTACATTGTGAGCAACTATTTGGTGATAGAA  
TGTTTAGGAGGTATATATGTATTATTCCTATATTTAGACAATCCACTAATC  
TGTTTAAACAAAAACAAAGCTCAAACTCCATCTTATAGATGTATAAAT  
GGAGAAAATGAAACAGAGCACTACATGTCTCCTGTAGACATAAATGATG  
TCTATAAATATATATCAAAGATATCTTCTTTTCTTTTAAAGATTTTATTTA  
TTTATTCATGAGAGACACTGAGAGAGAGACAGAAGGAGAAGCCTGATGCA  
GGACTTGATCCCATCAAAGATGTCTTCTGATAAAGGAAAAATACTATAATA  
CCATAAAAGCCAGTCTATTATTTATTGATCTCTCAATAATGTATAAAATG  
TCAACACTGCTCCACAGGTCTACAATCTTTCCATGATGGAATCTATGATC  
CTCTGTAAACAAATGTGTGAAACAATAGGACAATTTCCATTAGACACAAC  
AACAAAAATAAATGAAAGAAGGACACAACCTCTAATTGAAAGTTCTAAGAA  
TAGGAACTGTCCCTGTTTTAGTGAAAGTAGATTATCCGGCCACCAAATTA  
AATCAAATACTCATTGTCTCTCTCAAATACAGTCCTCTGAGCTCTTTTGG  
GAAAAAAACAAAAACAAAAACAAAAACAAACCCTGCTCGGAGAGA  
TCAGAAAAGAGAATGGTAGCTTTGGCAAAACCCAGGAAGACAGAGGGGCC  
TAGGAGGAGTTTCAGGGGAGCAGGAGGGGCAAGGTGAAGAAGGATTTAAGA  
GATGTGTGCATCCAGGTGAGCACCGAAACACACGCAGCCATGCGATTTTT  
ATAAGGGAAACGACTTTTCAGAGAAATAAAATATAGAAGTGGCTAGTCTT  
GGTTTAAAGGAATAACAGAAGGCCCAAATTAAATAGCATTTTATTAGCTTT  
TTAAGTGGAGTGACTCAAACATGACTTGTTTTAAAAACATAAGACATCCA  
ATTAACCCGACTTCTGAGCCTGACATTTAAAGGGCCACTGATCTTAGGAG  
GGATAGGCCCTTGAGGTTTCTGGAATCGATCCGTAATTGGTAGTGCAAG  
CGCACACAGATGCTCCCTTAGGGTATGCGTATTTGCACACGCTCAGACAT  
GCACCTAGGCTATGAAATGGCCTGCTTTGCCACAACCCACTGCTGATGAG  
AACACCCACCCCCCAGGGAGGAGGAGGGGGGCAAGCGGATGAAAGTGA  
ATTGGCGCTAAGCGCCAGGATGCAGGAGGGGATGAAAGATGCTGAGTGTG  
TGCCCTGGGCTCCCCAGCCTTGGGCCCTCCCCAGGCCTACCCGCCCCCCC  
CAGGGCCACAGCTCCCCGGGTCCCTCCATAGCCGAGTGAGCCGTTGGGC  
TGATCCCAGAGCCCCCATAACACAGCCTTCCTTTTACCACCTTCCGTTTAT  
ACAAAGACTGGCTTATCCCAATTTTTTTTCCCCTGTTGCCTTTGCAATGA  
AAAGCTCTCCACGCGCAGCCTAATAAAGTTCTACGCCTACCCCCACCCCC  
AGCCCCCAAATCCCTGCCAAAAAAAAGAAAGGGAGACTTAAACCTGGAAC  
TCATTTAGCTAAAGGGACTTTAGTTAACAAGAAAGTTACCCATCATGGAC  
TGCAGGTAACACCTCCCGTGATCCTAAATCCATTACCTGGAGACTTACCC  
AGGCTGAGTTTGATTTTATGAACTGTGAGGTTGCAATGTTGAAAGTCTGC  
AAATTGGACATAAATTGGACGCAAAAGACTGGGGGAGCCGAGTGATTTTC  
TCTCTAACGGTGAGAGCAGGCTCTGGCTCTCACCGGGGATTTCCTGTAATC  
TGGAGCGCTTCCAGGGATGAGTGCCTGGGTCCCCACGTCTCTCAATCTGG  
GACTTCCCTCAACCCCCCCCCCATACCCACCCCGCAAAAGAAGGTTTGA  
CTCCAACCTCAAGCGCCCCACCAAGAACAACCTGTGAATCAATCAATTCC  
TCTGCTGGAGGAATGTGCATGAGCGTGCACACGTGCACACACGCGCACCC  
AGGTCTGAGATCAGTAACAGAAAATGAGTTTTCTCCTACTCCTTGCCCC  
TACTGTCAACAACGTCTGCTGGTGTTTTTGAAGTGGACCACTTTTCATCCG

CCCCCTCGCTTGTCATTTTTTCACAATTGTATTTTCAGAGAGCACAGCTGAT  
GGCCATGAGGTATGCGGTACGACCGGCTTCTGGGTTTTAAGGAACACCA  
CGGTGGCTTTTCAGATTAGCCATACCTTCTGCTTTCCATTTTCATTGAGCAT  
TGATTGATTTTTTTTTCTCTTTTTTACTTTGTTCACTTATTTATCCATTT  
AATTTTTACTTTAGGGAAGGAGCTAAGGATGGCCCAGAGATCAAAGCCCA  
GGAAGGCCACATGTGTCCTAACTGAAGTAGAAGGCCAGGTATAACTAAT  
TATGTAATAGAGATAAAACAGGAAGATGCAGGGAGGGAGAGATTAAATCC  
ACCTGGAAGTTGGGGTGGAAAAAAAAGTATGAGTCTGGGCTTCAAAAAC  
GAATTGCAGTTCTCCAAAAGGAAAAGTGGTGTGGTCTCGGGTGGAGAGTA  
AAGATACGTATCCCCGGGCAGAGAGAGGGATTTTAGGGAGATGGCCAGAG  
AAAAGTTCATGGGATGGCCATTGGAGTGACATGACCATGGTCCCTAAACA  
CAGGGGAGGAGAGGAATAACAAGGGATAAAAGTCTGAACATGTCCTTATG  
GCCGAACCCAAATGCCATGCTGACAGGTTTGCACCTTTATTCATATGGAA  
TAGTAGAAGTTTCTAGAATATTGACAACATTGAGAAGTATATCATAAGCT  
TGTGTATAAAAAATGTGCTCAAGGCAACAACAGCATACATGTGTCTCAAAT  
GCATAAACCGACCATAGTTCAAACGATGGCACACTATATAATATTTTTAAA  
CAAAATAAATAGATCAAATGCTTTTCTGAAGTGAAGTAAATTTTTTTTTAA  
ATTGTGTATGACCTATCATTATTAACATTCAAAATCTAAAAGAACACATG  
AAGTATGTTTTTATGGATTCCCTGATGGTAAAAAGTACCTGTGAGGAGGT  
CGAAGGGAACATGGATACATCTGCGATGTTTTACTTTTTTTTTTAATAAAC  
AAAGCATAAAGTTGGAATCTCAAGCCAATATGACGAGATAGTCACAACCTC  
TTTTATGTGGGCTCTAGGCACTTGGATATGAGTGTCTTCTGAATTTTCCA  
TAGGACTTGAATATTTTGTAAATTTTTAAAGGGCAAATTCCTAGATCTCTT  
TTCTCCACACACTTGCTGCTTCTGCTCAATCTAAAGCTTCCCCAAATAT  
TTCTGAGAGTCTTGGGGAGCATCTCACATATGGTCATAAATAAACGTGGT  
CAGTCACCTTGGATGTCCCTTGGGTAGTTCTGGTCCCTATAGGAGGGACCA  
GGGCTGCTTCCCTGTCTCTCCCATGCCTCAATGAGTGCCAGTATCTTTC  
TTAGCTCTGACAGCACTTATTGATTTTTATTTATTTTTTTTTTGGGGGGG  
GTAGGTGAGATGGGCAGAGGGAAAGTGAGAGAATCTTAAGTAGGCTCCAC  
ACCCAGCACAGAGCCCAATGCAGATCTCGATCATGACCTGAGCTGACATC  
GAGTCAGATGCTCAACGGACTGAGGCACCCAGACACCCCTGAAACATATT  
TTGGTTCCAAAAGCTCACCAGGCACCACAGATAAATGAAAGCAAGTAACC  
TTTGGTCTTTTGTGTTACCCACAGTTCACAGGATACCAAGCAGTGATTAT  
TTTGCTCTTAGGGTATAAAAAATTTTTTAGTAAAATAGATCTTCTAGCTTT  
AGTTGTACAGTGTTCCCTCTGGATGAAGCTTCTAAATCCAGTAGGCTAATC  
ACAGGCTCCTGGCTGAACTCAGAATCATCTGTCATCTCTGACAACTCAGA  
TTTTATTACTTGATCAAGCTTTACTTTTTTAATTCCTTATTTCCACAAGA  
TGAGTTTCTCCCAAAGGCTCCCCAAGCCCACCTACAGATAAATGTCTTGT  
CATAACTGCCCATCAGTTTCAACGACATGCCCAGACATAGTTTAGGCTCA  
AGTTGGGTCTCTCCCTACACCAGGAAGTTTATTCTGGCAGAAGAATGTGG  
GACAGGCTGGAACAGGAAGAGGCTGGAGTCAGGGAGGCCGGGCAAGAAG  
GAGCTACTGCAAATATACAGGCACATTTTTATTTTCACATTTAATCATTC  
ACAGGCAGTCTTCCCTTGTGATGTACCGTGGGTGCACTACAGCACACATA  
TTCTATCTGTACACACTGCAGTGGGGTGTCTCTACTTCGTCAATCTGAA  
AATCAATGCATTGAGAACTGAGCCTTCAGAGGAGTATCTCATGAGGTTT  
CTTGACTCTCCCTCATCTGCAGGTATGGCCCTGAACCAGAAAACCCCTCTG  
GAAGATAACAGAGGGATGAGGAAGAAGGATGAAAGAGGTGATTCCAAACA  
TTACATAAGTGTTGTCTTTACATATGCCTTTACATAGTTGGCGCTCTGAA  
CTCTTTATTGTACCCAGGACCACTACTTCGAAAACAGTGGTGTAAAAGC  
AACCAAACCCAAACAGCTATGGGACATATTTAGAATCACCGATCAGGCCC  
ACCTTCTCTCATTATTTATTTAAATGTGAGTTCTAAAAGCCAATGCCTA  
CAGATCTCATGGATGGAGCCTTGTGACCTCAACTGGTCTTAGGCATGGT  
TCCAAGGAGAACCTCAACTGGTCTTAGGCATGGTTCCAAGGAGACCTCAA  
CTGGTCTTAGGCATGGTTCCAAGGAGAATGAAGACAAGATAAGAAATAAG  
CAAACCTTCTTTTTTTTTTTTTTTTAAAGATTTTATTTATTTATCCATGAGA  
GTCTTAGAGAGAGAGGGGCAGAGACACAGGCAGAGGGAGAAGCAGGCTCC  
GGGCAGGTCTCGATCCCGGGTCTTAGGGTCGCGCCCTGGGCTGAAGGCA  
GGCGCTCAACCTCTGAGCCACCCAGGCATCCTGCAACCTTTCAATATTGC

CTTGAAGTAGATAAATAGCTCCATTTGATTTGTTCCCTTTAGTACAAAGG  
CCAGTGTTCCTTAGGTGAACGCTGTTTTCTCCCCAGTCTCATTTGCAAATGT  
GTTAGGTTTTCTACAGTTCTGGATGCTCGCTGTATTACTGTAGGAAAAGT  
CATCCACCACTGAAGAGACTATAGCACAGCATACATCTGAAAGTATTCTC  
TTTTAATATCCTCACAGTACAACCAATAACAGATGGAGTTGGCTGGAGCA  
CATGGTTGATTCCAGTCTTAAGCATATTTATGTGGACCGCGCAAGCAAAT  
AACTGGGCCCTAACTCAGCCAATTGCTACCTAGCAGGCTATGAGAGCTCT  
TTTCTAATGTTTTCAACTACTGTCATTGCTACTGTTATAAGCCAACAAAA  
CAATATTTCAATACGGTTCCCCCTATGTCACCTTGCCATCATAGTATTTTAG  
GGATGGCCCAGGTTTTCTCATAAGCCCTGTTTTCTTTTTAAACTATTGGGG  
AAATGCAAGAAGTTTCATCCACATGGCATGAGGACAACCTTCTCCACTTT  
TCCCTTTGATTTTGGTGTAACCGAGCCAATCAATAAAGCTGGATTATCAG  
CAATATCTTCATTGCGAGGCAGGAGAAATCAACTTTGACCACAATATGAT  
TCCTTTGAATTTCTTTGTGTCCCAAATGCAGTTGAAAAATGCATGACGAT  
AGCCAAACTGTGGAAGGAGCCTCGGTGTCCAACGAAAGATGAATGGATAA  
AGAAGATGTGGTTTTATGTATACAATGGAATATTACTCAGCTATTAGAAAT  
GACAAATACCCACCATTTGCTTCAACGTGGATGGAAGTGAAGGGTATTAT  
GCTGAGTGAAGTAAGTCAGTCGGAGAAGGACAAACATTATATGTTCTCAT  
TCATTTGGGGAATATAAAATAATAGTGAAAGGGAAAAATAAGGGAAGGGAGA  
AGAAATGTGTGGGAAATATCAGAAAGGGAGACAGAACGTAAAGACTGCTA  
ACTCTGGGAAACGAAGTAGGGGTGGTAGAAGGGGAGGAGGGCGGGGGGTG  
GGAGTGAATGGGTGACGGGCACTGGGTGTTATTCTGTATGTTAGTAAATT  
GAACACCAATAAAAAATAAAATAAAAAATAAAATAAAATAAAATAAA  
TAAATAAATAAATAAATAAATAAATAAATAAATAAATAAATAAATAA  
AAGAAAAATGCATGACGAGGTGCTTGAGCTTCTACGGTTAACTCTACCTC  
TCTCTTTCACAAAATAAAACAGCGTTCCATTCTTACACAAGGAAATTTTA  
AGGAGTCCACTGTTGTGGGAGGTCAACATTATCAATAATGTAATTAAGCT  
TCTTAAGAAGAAGTGGATAATTGTCTAAGCAATTGCCAGCTCAAATAATG  
ATAAAAGTGAAATCGAGTCGTCTGCTGCAGGGTGTAAGCTGAGTAGCGGT  
GGTAGTTGGGGAAGGCAGTTCCTCTGCTATTTATTTATCATATTTACCG  
GACTCTCCCATTCAGGAAAAAGCCTGAGGGCACAGTTAGGAATGGCTAAA  
TGTGGTGGCATAGAAGTTACCTTTTTATCTATTTATTTTTCTTTCTGTA  
TCTTACAAGGACATGTAAATACAGGAAAAGCTATCAGAAGCAGTTGTGTT  
GCTCAGGCTGCTTTATGGGCTGTTGTTGTGTATAGCTGGGGGGTTTTCAG  
CCCCCTAAAAACACTAGGACCAACTTCTATGAACATAAAGGATGTTCTT  
GGGCTTTTATTGTACAGTACAAGCTGTGCTTTCTGCCTGAATCCAGAAC  
CAAGAACCTAAAAGAAGTAAAGCATGACTACATGTCAAAAAGAAAAATAA  
ACTATTTTCCCGATTCCATCCTCTGTTCTCACCTGTGTATTTAATCCCT  
GTAGTTGACATGAACTGTTGTATAATTTTTGAGCTTTGCAGCTGTAGAA  
TAGAGAATGTGAAGTGGTAATACTCTCATTGAAATAGGACCATAGTGCCG  
GGCTTTGCATGCCCTCTTGAGTGGCACACAGCACTGCTAAGGTATAGAAA  
AGCTTCTCTGAGATGAGATAATTTACAATCAGGATTGTGTATATTAC  
TGGATACTCCTAATGCAGGAAAGGCTCACTGTTGGGCCAGCTGCCAGCTG  
GGTATCCAGTCTTCCTGGGACAGGCAGTCCAATGGTAATCCGAACATCAT  
CAGGGTACATGTAGACTTTGGAAGGGATTCCCATAGGAGGATGCCCAAGA  
GCACAGCCCTGAGTGTTGGGAATTTATTAGAATAAAAAGAAAAACAATC  
ATAAAGGTCATAAAGCCATAAGGGCTGTGAGAACACCAAAGTAGTGAAAG  
TGTCGTTTATTATTTCTGATCACCACCAAGCCTAGGAACATTCTTGGATAC  
CTGTGATGATATAATCACAAGCTCCGAAACCTAAGATGTCTCATCTAATT  
CTTTGTTATGATTTTCTACTGCCAGCCTGATTCTCATTTCCACAAAGAG  
AGTCACTAAATGCTATTACTACTTCCAGTAGAGCATTTATCCATTTTTTT  
TTCTGATTAAAGAGGAATTACATGATTTAAATATAATGTGAGGGACAAC  
GCCTAAACAATTTTCAAAGATCAATGCTAACAGTGGTTGGAGACATGCCT  
AAGCAAACAAGTCTCGTTGTATTCTCACTATTGCTTGAATATGGATTGCA  
CTCTCTGTCTTTTTTCTAAATATCTTTTAAATTAATTCTCTGTTAGAAGT  
ATATTTTGTAAAGAGATATTTTTCTAATATTTTCTAATCCATAACATGGAT  
TTTCATATGAATATTATGTAATTTAGTTAACCAGCTATACTTTTTTGTATA  
TTTCAAAATTCTGTTTAGCATGATTTGTAGCTTTTCTGAACATGCCTGTA

TGCAGAACTATTGCTATTTTCTGGGAAAAAAAAACCAATATAATCTAGAA  
TATGGATTATAGAATCAAATAAATATCTATAAGACCTTAGATGAATATCA  
CAAACTATCCTCTAGAAATATTTTGCTCATTTTACCACACAAGCAAGTC  
ACCTTCTTTTTTATTATGCTGGTTTTATTTTATTTTGTTTTGTTTTTTTAA  
AGCAACATGGGCAAAATAAATTATAAACTCACGAACCTTCAATATGTGA  
AAAGAAACATGTATCTGTCTATCAGTTTTATTGTGGCCGGTCCTCACCTGA  
TCAGAAGAAATAACACCATTGCACACAGCTGCCAAGGGATTAGGACTAAC  
CAGTTATCCTCACTGTGCCCACATCCTCCATTTCTGAAACTGAGACATA  
GCTTAACCATATTTATCTCATTGCAGCAGACATGAATGGGCTCATGTTAC  
ACAGTAACACGGTGTAACCATCACCACGAAAAGAATATTCTTGTTGTAG  
GCGGAACATGTGACAAAAATGAGGAAATGTCTTTTGGAAATATTTTTGGA  
GGATTCTAGACACAAGATAGGGTACAATCCATAAATATCTCCGCGTCTGA  
GGTGGGACTGACATTTGGGATTCTCAGAATTCTCAGAACTTCCTTCCTGT  
TCTGGGAAGTAATAACGAACCTTCTCTGTTGATAAATGGTTACTTACCC  
GTTATACATTGTGAACCGCCATTTTGGTCACATTTAGATTAGATCTGCAT  
AATTTATGAATAGAACATTAAAAACAAGAACAATAGTGTGAACACTGTCAG  
AGAGTGAATTCTGGTTACTATACAGATAGCTCAAACCAAAGTTTCTTATC  
ACAGGCCATTTGAAATTAACCTGGTGGAGTATAGAAAAGGTCTAGGTTCT  
TCAGTCAAGTGATTAGAAGCCCTGGTGTAGACGTGATGCTACAACATGAA  
AGAAACATGCCAGCCTTTGGAATTTGACAGACTTGGATTTAAATGGCTG  
CTGTGTGAGACTGCATGCATGTCTTATCTTTTTTTAAAAATCTTATCTTT  
TTCATTTAATTGACAAGGATTTGGTGGGAGAAAGTATAGAATGAGCTGAA  
TGTAGAATAAAATATTTAATAAATGATAATTATTAGGATTCAGTGTAAAA  
TGCCTAGAAATACTAAATATGGAATGGATTATCTGAGCTGCTTCCTGCCC  
ATTGGCAAATCCCAAGGTTTACGAGTATAGCTAAAGTCATCATAAAGCCC  
ACTGAATAATTAATTCACCTACTTTGGTCCAAATCTCCAATAATTATTCG  
AGATAAACTACACTGGGTTAGATCCTAGGGTTATAGAGAGAAATAACTCA  
CAATCTTCCTCTGTGCAAACAAATAGGGTGCCTCTAATACCTACCCAAAG  
ATAGAGAATAGTTCCTATCTCTAGTTATTCATATACCATTCTCAAATTAA  
TAGTCAGTTACTGCTTCCCAGTGTTCTGCTTTTGAAACCAAACCCCTGAA  
TCATTTATCTTTCTTTACATAAAAACTGCCCAATTTCTACCTTATTTTTTC  
TGGACTTTTCCTAGCCTTTGCAAACATTGCTATGACTTTTATTTTGTGGA  
CTAATATGTACAAAGACATGACCCATTCTTAATTAAGAATTATGAAGGA  
ATTCCTAACTATCTGGGAATGAATCTTGGAATTAATAATTTATCCATGAGC  
CCTCTGCTTTTAAATTTATAGTAACATTTTCATCCGTTCAACAAATTATG  
CACTTTGTGGAAGCGGGATATTTACGTAAGTTTAGGCTAGCAAGCAGAAA  
AATTTTCAAAGCCAAAATAAGTATCTCTTGCCCTGAGGAAGGTGTGAAG  
GGGTAAAGATTTGCAAAGGACTGCTTTTCTTCGGGTGGTGGTTTGAACA  
ATCTGCCCTCAGAAGTGATATAAATAAGCCCTTCTATGAAAATAAGGAGAG  
GAGAGCCAAGCACGAAGGCAAATGAGAAAGGTAACCTTGCCCTCATTAAAC  
TTCATCATATGAATCATTAGATTATCTTAAGAACTGAGAAATTCTACTTA  
TCACATCACTGCGGTTATATTAAAATAAAACCCTCCAAAGACCAAATGGA  
CACAAGTTGAGGATTATTTTCTCTCTCTAGAGTTTTCCATGAGGTCTTTT  
GTCCCCGTCTCTTTTCTACCCATTAGTGCAAATAACTGATAGGCGACTGT  
GTGAAACGTGAAGTGTGGGCTGGGTAAAGACTTACTCTCCTTGGAACA  
TGAATGAGGGCAAAAAGTCCAATTGAATGGTAACCAAAACAAGACATTCT  
GACTGCTCGGTCTATGATGGAAGGTACCTCTCATAACAGAGAGGACTTTG  
ACATTTTATTTCTCTTCTATGAGAGGGATCAAGGTGGGTAGACTTCTTC  
CCTTTCCCCTCAAATACTAGCTCAGTTCTCTGAATACTAGAGCATTATTT  
GCAGATTAATTTATTTGTAGATTTTAAAATCCAGTTCGTTTTCTTTTTT  
TTTGTAGTGTTTACTTAGGAGAGATCGAATAGAGAATGGAAAGAAAAAGA  
AGAAAAAAAAGCACACATTTGGGTGAGTAACAGAATTAACACACACTAG  
ATCCTTTGATAGGCGGGAGAGAGGTTTGTTCAGGACCGGGTCCCCTAGAA  
TTTTGAAAAGAAGAAGAAAACATGAAGGCATTTCTTTTAACTTTTGGA  
GCAGACTAATTTGGAGTTTATAATTAATTTAGGACCATTAAACATTATATG  
GAGGTGGGGGGACAAATTACCCACAGCATCTCAATCCTCCGGTGGAAGC  
ATATCCAAAATAAATGCTGTCCCTTGATACTGTACCATGAAATACATTTT  
TAAGAAACCCTTGGCGCCTTCTCCCTGAATTTCCAACATCGTCTGCTAAA

GAAACTTTTCAATGAAACCACACAGGTACCGCCTCAGAAAAAAAAAAAAA  
AAAAATCATGGCACCAGAGAGCATTTTCCAGCCAGTTAGCTGGATGTATT  
CACATTTTTTCATATTAGCCAAGAGATGTTTGGGATAGCATCCATAGCATA  
AGGATTTCTTACAGAATTTAAGATGTATTTTTCTAATGAGACAGTCTCCT  
GATCTCTGTCTCTTGTCTCTCTGCAGCTATCTACGTATTTATCTTTGTCT  
ATCTGTCCCTCCCTCATTTTCAATCAGTGTCTTCTACTTAATTTGGAAGG  
GAGACATTCCCTATGACCCAAACAATAGGCTCACCCACATTTCAGGACCTC  
AAAGCATTTCATCTTAGTGCTTCCTCGTGGTTATCATTCAAATAAATTACT  
TAACAACACTGAGTCAATTGTCATTTACTTTTTACATAAATATGAATTAG  
ACAAATGTAATATTTACAATAAGAGGAAATTATGAAAGGAGAAGGTAAGG  
GGCATACAATAAGAGTATCTTTTCCTTTTCTGAAGGAAAAACATGCAGA  
TGTTCCTTAGCAAGAGAGTTGTTTCTCAGGTATATTTTCATTTCAGTCAGCC  
AGGGGAAAAAACAACACAGAACAATAATCACAAGCATTCAAGCAACTGTA  
TTTTAAAAATTATAAGTCAGGTACCATTTTTCTAAAAATGAATTATGGAA  
GAAATAAACTAGTCAACACTATATCAGAATCTCATTTTTCTGTTCTGTCA  
GGATTTCCCTGAGACCCAGAGCACTGAGGTGCCTACCTTGGTTCTGGAGC  
TTCCAGATCCCCACACTTTGGAATGGTCTATAAGATCATCCAGGTGGGAT  
ACCCAGATGGGGCAACATATGAGACCCAGTTTCTGTTTTCTCCTTTGA  
GGCATATTTCTGGTCTTTATTCAAATGTGGGGCTGACCAGACACCCTTAT  
GAAGTCATCCTGGGTTTAGTGTGGGGAACACTGAACCCAGAAAAATAGCC  
TGGCAAGTCAATCTCTGGTACTTGGATTACTGTCTTTCTTTAACTTCCAT  
GTCGGTTACTATTCTTGATAACTTTGATGTCCATATAAAAAAGAATCCTT  
CAATAGCCGACCAGTGTATCTCTTCTTCAGATACTACAGTGTTTTGGGC  
AGCCCGGTGGCTCCGTGGTTTAGCGCTGCCTTCGGTTCAGGGCCTGATC  
CTGGAGACCCGGGATCGAGTCCACATCGGGCTCCCTGCGTGGAGCCTGC  
TTGCCCTCTCTCTCTCTCACTCTCTCTCTCTCTCTCTCTGCCTCTCATG  
AATAAATAAAATAAAATAAAATCTTAAAAAAGGAATTACTTTAGATACTA  
CAATGTTTCTTCACCCTTCTGACTTATACAGTCAGTCGTTGACTTATGAT  
ATGGCATACCAAGATTTGGTCACCACTGGTAACTATACCAACTCTAAAAT  
CTTAATTTTAAACAGTGTCTGTCTTTGACCATGTATTAACACTAACCCTC  
CAGTTCACTTATGCTGGTTCACCCAATTCACCTACCCATCTATAGCACTA  
CATTTTCATTATCCATCAAAACCTCTTTATATCCAAGTGTTTCATTTCTCT  
TCTTAAGCAATCTATGCCCCGTCTAGTACAATGACCGATTCCCTGCATAT  
ACCATAAAATATGCCCAGCAATACCCAACCTCTAGTGAACCCATTAACCAC  
TTACTCAATGTCTGGATCTGAGTATCTGAACTATCCTTGAAGTAAGACAG  
GTGACAAATTCATGATCACAAGTAAGCCCCCAAATTTCTGGATTATTTG  
AGCATTTTAATAGAGTCATTTTTCCCTCCCACTGTATTTTTCTCTAAAATA  
TTCAACACCTTCACTCCTAATTTCTCAGTTGAAGACTCGATTCCCACTTC  
AAAAAGAAAATAGATCTAATAAGAATCCTTATCTGACTGCAACCACATCT  
ATGGATCCAATTGCATATGCACCATATGTTGAAATTTATCTCCTTTTAAA  
GTACATGAACTTCCCTGCTTTTATTCACAGCTAATTGTATACTCTGGATC  
TATTCCTCTCTGCCCTCTTAGAATTCATTTCTCTGGGATTCTCCCTTTCT  
ATTCTGCTCACCTACTTCAAACATTCTAATGATTTCATTACATTGGTATT  
CAAGTGTAACCTTAATATCACCCACCTTTAAAGGCCTTCTTTAGATCTCA  
TGTCCATCTTTATTTACTGTTACATTTTTCCATTCTCTTTGCTACCAATA  
ATCATCAAGAGTTGTTTATAGTCTGTGTTCCTAATTCCTTAGCTTCCATT  
CTGTTCTTAGATCACTGCAATTGGACCTTCATCCCCATTACTCCATAGAT  
ATTTCTCACACTATCACTAACAACATGAACCTTGTGAATGGTGATGCTTC  
TAATACTCATTTTAAACACATTTTAAATAACCTTTTAAATATTATATTTA  
AATATTAAATATAATAATAAATAACATTTTAGCATCAATAGACACAGAGAA  
CCAATCCCTTCCCTCTTGAAAGTCTTTGTTTTCTAGATATTTTTTCCCCA  
GCACTAACTCTCATCTGGTTTTATTTTTCTATTATTAATTAATTAATTAAT  
TAATTAATTTATTTATTTATTTATGATAGTCACAGAGAGAGAGAGAGAGA  
GAGAGGCAGAGACACAGGCAGAGGGAGAAGTAGGCTCCATGCACCGGGAG  
CCCGATGTGGGATTGATCCCGGTCTCCAGGATCGCGCCCTGGGCCAAA  
GGCAGGCGCCAAACCACTGCGCCACCCAGGGATCCTATTTCTTACCACCC  
TTTCTGAAGTGTTTCTTCTCCCTTACTGGACCTTAAACATTCAAATGCC  
CTAGAGCCCCTTTTCTCAACCTTCCTGTCTTTTCCAGTTATACCTAATTC

TCAGTTTTTCATTTGTTCTCATGGTTTTAAAATACTATATGTATGCTGAAGA  
GTCTCCAATTTTCATCTCTAGACCAGTCTTCTGAGCTCAAGAATTACATC  
TGA CTGCCTATTTGGGAGCTCCATTAGGATATCGAATTGCCATCACAATA  
GAACATGGCCAAAAGACAAAAGTCTTGATTTTCCCCCAAAAAGTATTCC  
AAAATTTTAGTAGACATTTTCTAGTAAACAATGTCACCACCCTTGGTCATT  
TAGAAATGGAAACGAAGAATTTTCCCTGGTTATGCTTTCTTCTTTATGTA  
AAACATCTACTCTAAGAGCAAGTCATGTCAGCTCTGCCTCCAGAGTATTT  
TATAAATTC AAGCTTTTTTCCATCACACTACTAAAATCATATTGCAAGGT  
CAACATCTTCTCTAGCCTGGATTATTCTGCTAGCTTTCTGACCAGTCTCT  
CCACCTCTAGCCTGACCCACTCACTCAGGGTTGCCTATCTCACCATTTCC  
TCCACAATGCAACAAGAGTGATGTTTTTTTTCCAAATTGTGACTGTTCTCA  
CACCTTCCCCAGCTTAAAACCTTCTTTTTTTTTTTAATTTTTATTTATTT  
ATTTATTTATGATAGTCACAGAGAGAGAGACAGAGAGACAGAGACACA  
GGCAGAGGGGAGAAGCAGGCTCCATGCACCGGGAGCCCCGACGTGGGATTCTG  
ATCCCAGGTCTCCGGGATTGCGCCCTGGGCCGAAGGCAGGCGCCAAACAG  
CTGCGCCACCCAGGGATCCCAGCTTAAAACCTTCTAATTGTTTGCAACCA  
GATTATCCTGTGTGGATTACAAGCCCCCTATGCGACTTGCACCTTGCCTGT  
CCATCGGATCTCTACTCTCTCATTTCTTCTGATGTTCTTTCTTCATATGC  
TTTAGGGCCACTCTTCTGTCTCAAATCTGACATGCTTATTACTGTCTCAG  
GACTCCCATTTGTTATTTCTCCATGTAGGACACTTTATTCCCTTTAGATT  
TCCTCAGCTGCTTACTTCTCATCACTGAGGTTCCAAATCATAAGTAACCT  
TAGTGATGATGTTTCTGACCACCTGAGTGAAAATGAACACCTGATCTCTA  
TCACATTACTCTGGGTTTACCCCCTTTTTCTTCTTTATAGTACTTTTCAA  
AAGTTGGAAGTGCCTTATTCATTTTGTGTTTCAATTTTTGTATCTCCTCTT  
AAACCCAACTAGAAGGCAAACTTTTATTCGTTGTTTCAATTCAAACTTGTT  
CATTGCTGTACCCCCAAACCTAGAAAGGAAATTGTTACTTTGACTTTTAA  
AAGAACCATTAAATTTGCTCATTTGGACTAGCCACACCTCCCTCCATTGA  
GATACAAAGTGTGAAGCATGCTTCAGAAATCCCAGCAAACTTTAATGCAC  
TCCCATCAGTTGATTATAGACAAATGAAGAATAACAAAGTGACTCATTGT  
CTCAGACAACTGTCCATAGGTTAATACAGAATCTCTCTACCTTATAGGGC  
AGACTGCCAGGTCAGAGATTGGGGCAGTCTAGTTAAGTTAAACCAAGGTA  
CCCGGATTTTTTTTTTTTTCATGCAAGCAGAGCAATGGTGATAGTGCCTAT  
CAGCAGAGGACCCTAGTGCCCTAGGGGTGTTTGAAAAGCAACTGGGTCAT  
ATGAAAGACTCCTCTGTCCCTCCTTTCCCCAGTGTCAATCTTTAATTTAG  
AAGAAAAGAAAATTACAGCTCTCTTATTTGGCTGTATTAAAATTTATGGG  
GCAGGGTGGTTTCCAGGCTGCTGCTCCTGCCGGGCACTGCTCTGATGATA  
TATGACTGTGACATGTCACCAGTGTAGCCAGGCTCTGATGATCCATTGCC  
GCAACAAGTCATTTGTCTATACATCACTGCCTCAACAGCTACCCCCATCCG  
GGCCTCTCCTGTACTCTCCAGCAGGGAGTCGTGGCTCAAAACAAGCTCCA  
TGTTCCCACTGCACTCCCACCACCACCGTTTACCACGCATTTCTACTC  
TCAGTGGAAGGGAAGAAAAATAGTTTTTTAGTAGCAAACTCTATGGGAGGA  
TCTTAAGACTTTTAAAGGTAAAGGGTTCGTATACCCTGATGCTGTAAACT  
GCTAGCAAAACAATGATTACAGGAAGGTGCTTTATACTCTTGGAAGCCAC  
ACTAATAATAATAATTAAAAAAACACTAGTAAATAGTTAGGTAGCACCCA  
ATTATTGACAGCCATTCTCCTAAGGATTATATGCATTAACTAACTTAATC  
CTCTAACAATCCCTTAGGGGGATGGTACTATCAGCAACCATTTACAGAT  
GAAGAAAATGGGGGCATACAAAGATGAATTTTCCCACTGTCATTGAGTAA  
AATAAGTGGCAGAGATGGCATAGAAACCTGGGAAACCCGGAGCTGGAACC  
TTTACCCTCAACCATTGGTGTCATGATGTGTATACTTCAATGTCCAATCCT  
AGTGGTTCCTCATGTAGGCTTATATTGACCCCTGACTTCTAGGGCCAAAT  
AAACACATGGGCACAGTACAGGTATCTTATCATTTATGTGTCACTGTCAT  
TTATAATAACACCCTTAGCAATTGCTTGTTAGATTCTACAGTATGTAAT  
AGGTGCTTTGCTTATGTTTAGATCTTCCAACACTGAAAAATATTGTTTTA  
TTTCCTTCTGTTTTGAGTAGATGTGTAGAGAAGTAAATAAAAAAATTACT  
GAAGATATTTTCAAAGAAGGCACCTTGAAAGGGGAATAAAGAGGAAGACCA  
AATGATTAGGGACAGCTATACATTAAAAGGAGTGGGTGACTGGAAATAAT  
TTCTGTAGAATTGCTGAAATGACATTTGTATACATTTTATGTAAGTCAAC  
TTAATGACAATCTATTCAAATGTCACCTAAGACAGAACTATAGAGTATGT

CTGCTTTTTTGTTCCAACTGAAAGTTAAAGCTTATGGAGGGGATAGGAAA  
TCCCTTCACGGGTTCATATTCTTCACAATTCTTAGCATTC AATCAAAACA  
GGTTGATCTGCAAAAGAAAAATAATAATAATTTGGGCTTCATTAAAATGC  
AGAACTTCTGCATTGGGAAATACATGGTTAAGAAAACAAAGGTAAACCAC  
AGACAAGCTTTTTATGTAAATAACACATCTGGTAAAGGATGTGTACCCAAG  
ATATATAAAGAACTTCTTGGGCAGCCTGGGTGGCTTAGTGGTTTAGTGCC  
ACCTTCGGCCCAGGGTATGATCCTGGAGACCTGGGATCGAGTCCACGTC  
AGGCTCCCTGCATGGAGGCTGCTTCTCCCTCTGCCTGTGTCTCTGCCTCT  
CTGTTTCTCTCTGTGTCTCACATGAATAAATAAATAAAATCTTAAAAAAA  
AAAGAACTTCTCTTCACCTCAATAATAAAAAAAACCTCAATTAATAAATA  
AGCCAAAGATCCAACAGATACATTACCAGAGAGATATAAAGACAGGAAAT  
AATTATGTGAAAATATTCAGCATCATTAAATCATTAGAGAAATGCAAAATA  
AAATAACAGTAAGAGACCATTCCACACATGTTACAAGGGCTAAAATCCAA  
AAACAAAACAAAACAAAACAAAACAAAAAAACCTGATAATACTAATGT  
TGGTAAGGAAAAAGAATTACAGAAACTCTCATTGTTGATTGCTGGTCAGG  
GATGCAAACTGGTGCGGTCATTTTGGAAGACAGTTTGGCATTTCCTACA  
AAGCTAACCCGAGTCTCAACCTATAGCCCTGCAGTCATGCTCCTAGGTAA  
TTACCCAACCTGACTGAAAATGTACAGCTATCCAAAACAAGAATATGCATA  
TTTATAGCAGATTTCTTCAGAGTTGTCAAAAAGTACAAAAAATCCTTCAA  
TAAATATATGCATAAACTGTGTTTTATCCATAAAGCTAATACTATTTGGT  
AATAAAAAGGAACGGGCTATTAAGCCACACGTAGTTGATTTTTAAATACA  
TTTTGCTAAGTGAAAAAGAGCCAGTCGGTAAAGGCTACACATTGTCTGTT  
TCCATTTATATGACATTCTGGAAGTGACAAAACCTGTAGAGGTAATATACA  
GATCGGTATTTGCCAAAAGGTGGAATTGGGTGGTGAAGCAATGAGAACT  
TTTTTAGGGGAGTACCACCATTTTGCACAAAAGTATAATAAAAATACATG  
AGCCTAAGTATTTGTCAAAACCCAAAGATCTTTTCAGCATGAAGAGTGAT  
CTTTAACAGAATCATTTCAGGAGTTATAGGAGATTCCGGGATATAGCCAC  
CTTTACTTAAAGGTATGAAACAACCTTACTCAAGGAGATTAAAAAAA  
AGTACTGATTTAAGTAACTTTGGAATGAGTTAAATCTTTATGATTAAAA  
GCAGAAAAGACTGTTAGTAAGCCTGGTACTAGTTGATAGTTTTGGGTAA  
TAGCTCACAAAGTATAAAAAAAAATCCATGAGTGCTTCTCTGATATAAAT  
AAGTAACTTAATAAATAATTACAGAATAGTCAAATTTCCCATTCAGAAGA  
ATTTAAAATAATTTATGTACATATTACGTACATTGATGTACATATTCCCC  
CTCAACAAAGTGAGGCATAGCTCCCACTCCTAAAGGGTGGGCTCTCCATA  
CTGACTTCCTTCCAATGAGTATAGGGTGGAAAGGGGAAAAAGGAGTAACT  
TGACTGTGAAGAATTCTGACAAACACTACTTCACCCAGGTAATCAAGATA  
TCTACAGTAATAAATCATGTTGATAGGGCGGCCTAGATGGCTCAGTGGTT  
TAGCGCCGCCTTCAGCCCAGGTGTGATCCTGGAGACACGGAATCGAGTCC  
CACGTCGGGCTCCCTGCATGGAGCCTGCTTCTCCATCTGCCTGTGTCTCT  
GCCTCTCTCTCTCTCTCTCTCTCTCTCTGTGTGTGTGTGTGTCTCTCA  
TGAATAAATAAATAAAATCTTTAAAAAATAAATCATGTTGATAAATGTA  
TCCTTGGTATGAGAGTATGTAAATGGCACTTTACTTCTATAGATGTCCTC  
CAAAAACCCATAACTTCAGTCTAATAATGAAAAAAGAGAAATG  
CCAATAGGTGAGCATTCTACAAAATGCTGACCTGTACTCATCAAACTAT  
CAAAACCATCAAAAACAAGGAAAATCTGGAGCATGTGGATGGCACAGCTG  
GTTGAGCATCTAAGTCTTGGTTTTGGCTCAGGTCTCAGGGTTGTGAGATC  
CTGCCCCATGTTGGGCTCTGTGCTCAGTGCAGAAGTCTGCTTGAGATTGT  
CTCTCCTACGCCTCCCACTCATGCTCTCTCTCTCTCACACACACACAC  
ACACACACACACAAATAAATAAATAAATAAATAAATAAATAAATCTTAAA  
AACACAAAACGGAAAGCTGAGAAACTCACACCAAGGGAACCTAAGG  
AGTCACAACAGCTAAATGTAACAATACTTTGGTTGGAATCCTGGAACAGA  
ATAGACATTAATAAAAAGTGAAGCAATCTCAGTCAAGAATGGACTTTAAT  
TTAAAATAATCTATCAATATCGGTTCAATTAATTGTGACAAATATGCTATG  
CTGATATAAGATGTTAACACGAGAAAAACAAGATGTGGGTTATAAGGGAA  
GTTGGTGCTATTTTTCAGAGTGTTCCTGTAAGCTAAAGATACTGTAAATT  
AAGAGATTATTAACACAGATAAATGAATCTCAGACTTATTGCCAATAAA  
AATGTAAATAAGTTATTTTGCAAAACGCAAGCACACAAACCTTTAGAGT  
GCTTGATTTGACAGATATTTTTAAAGACTTTAGCTTGACAAAATTCACT

AATGCTAAAGGAACTCTTGCAAAAAAACTCAGCATTTTAAAGAAAGGCGG  
GAAAAAATAAAATCAACTGAGCCTGTTTACCAAGACAATCCACTATGCCC  
TCAAAATCTAAGGAAAATGTCCCATGCTGCGGGATCCTGGAGACTTGGA  
TCGAGTCCCACGTCAAGGCTCCTTGCGTGGAGCCTGCTTCTCCCTCTGCCT  
GTGTCTCTGCCTCCCCCCTGCCCCCGTCTCTCATGAATAAATAAATAA  
AATCTTTAAAAAATAATTTAAAAAAAAGAAAAGAAAAGGTCCTATGCTAA  
AAAGCACTGGAAAAAAAATCCCATGCTCTCCTGTTAAGAGGTGGAATT  
AGGAAACTCACTGATGATGAAGTAATGTGATCAAATCACTACAGGGTTTG  
AGATTTGATTTCATGAAGAGAGACCCAGTTTTTAAATGGGTGGATAAGGAC  
TGACAGCTGTGAAAAGTTATTTTAAAGACAGCATCAGTCCAAAATCTTTT  
TACTTGACTTACCAGACTTAATAACGAATACAGTCACACTTGACAAATTC  
TATTCTGAATATCCAAGAATCCATCTGTGCCTCTTGCTTGGAGACTTTCC  
ATTCTCTATGCATTCAACTATAAGCTTTGGTGAGCATTTGACTCTTTAGG  
GAAGAGGTTAGAATGTTATATATCAGGACAATATAAGCCTCCCTATTTTATT  
ACATTTTCAGATATTTTGGAAATGTTGCTGGTTACGTGTTTACGCTTCGTT  
TATGGTGTTGCTTGGCCCATGGAACCCTCAGTTGGTTATTGGGATATTGG  
GATCCCCAGTGAACAGTCTCACTCAGGAAGACCAGCTCTGCATTTGAAAA  
ACATTTAAGTGGATCAGAGCCATGCCTTAAACTGTACCAACTGCTAGTTG  
TAACTTCTTCATATGCCACTGTGTGGTGGAAAAATCACAAATTCGCCCTT  
GGTTTTCTTAAGGAGTCTTCTCTGAAGGGAGGGGTAGTGGATTCTTAAT  
ATCTGTGCTGCCGTGGCCTCCAAAGCCAGACATTCCCTCGTGAATATTCCC  
CCAGGCCAGGCCTTTTATTCCAGGCCGAATATTGAGGCCAGCAATCAATA  
AGTTGGTTCTCCATCTGCCTTTGACAGAGGAAACACCAGGCTGACACCAG  
CCAGTCTGGGATCAGCTGTTTCCCGGCCTTTGATCTGCTCAGCTAGGGCT  
GTCTAAGCTCCCTGGGCCTCTGCTTCAGCTTAGATACAGGCCACGTCTCTG  
CTGATATCTCCTCCAAGGCCTATTGTAGCCATTGTATTTGAGGAGGGGAT  
CACCTGTCAAAGTGACTGGTTACAACCCCTCCTTGACTGCGGGAAGCCTT  
TTTGATTCTGGGGCAGATGATAATGAGAGTCTAATTGAGTGATTAATACTACC  
TCAACTGACTTGGAGGTTTTAATGACACCTCTACATTATGGTCTGCGTTT  
CTCAGCAGGCCCTCAGTTTGTAACTGTAGGTCCGTGATATTTGCAATTAT  
AAGCCTTTCCTTTAAACCAGCAGGGATTTAATAAATGGACTTGGTTAATCA  
TAGCTAGATGCTCCTCACATCCGACTTTGTTGTGAAAAACATGTATAAGT  
TCAAGCACATGATTGGATGATTAAACAGGCCATTTCAAGTCCGTGGCTC  
TATGCATAAGAGGGAGACTGAGTTTGGGAAGATTTGGGTAAACCAAATCTT  
GATGACCAACATAAGCTTCAAGAAGGGAAAAATATCTAAAGATAAGAACT  
GGTTTTTAAAGTGTTGCCATGCCTATGAGAGCCTGCCTAGATATACTGTCT  
TTAATTAAGTGGGTCTGAAGAGCCTATTAATGCAATGTTAAAGGAACCA  
GTCTCCATGGGTCTCACAGTGGGAAAGGTATCCAGGGCTTTCAATTTAC  
AAGGTCTTATTACAAAAGTGCCCTGCTGTTCTGGTCCGTGTTCTTTCTGC  
CTGGGAGCAATTTAATGATCTGCTTTAGAGCAGAGAAATGGTCAGAGAGA  
AAATGTTCAAGTGTTATGTGTTAGCAATCAAATACCCAATGGAATTTACAA  
TGGTAACCAGACACTTCCTTTTCATATCAAAGTAGAACAAGGACAATGAC  
ATAAATACATTTGATTTGAAAAACCCTAATTGAACAACTGGTAGTCCTC  
TGTGAGTGTTTGTGATAGTATGAGGCTAGTATTGACTATGATGCAAAGT  
GCAAATGATCTAGATGAAATGTACAATGTAAGAGAAAAAAAAGGAAGAGA  
AGGAAGAAAGAAAGCTTTTTTAAAGAGAATATGGCTTTTGACTTGAAAAT  
ACCTTAATGATCTGTTCTTCATTTATTCAACATCATTTAAGAAATATTTA  
TAATTATCTAAAAAAAAGAAAATATTTATAATTATCTATCATGTCCCA  
GGTCTTCTATTGCCTATGGTGGGGTTAACCACATATCCACATGGTGCTTGC  
AGGCAAGTAACATAATCCACCCACTTTTCCCTTTCTTTATTCACTTAAGTGC  
TGATAAATGACTATAATGTAACAATTATTATTATATTCTGTTGATAATAT  
TTTGATTACCTTTATTTCCCTAGGCCTAAATGCAAAGGCCTAAAAATATC  
ATTGGTGAATAAACAAACAAATGAATATTTATGGAAAAATTCCTGATCTG  
GTCGATGCGGTCTCTACTGAAAGCACAGACATAAAACAAATACTTACGGT  
GCAATGTGATAAAAAAATATATATATATATATATATATATATATATATA  
TATATATAAAATAGCAATTTGCACATGGTGCTAAGAAACCATGGAAGTGG  
GACTTAGTCACTCCTTAATTGAAGTAAGAAAATATAGAAGATGTGAAA  
TTTCAACTGAGTGTGATGAGTTTAGAGAGTCAAGGTGGAAGACAATTCAG

AATCGGAGATGAGCTTTGGGCATCTGTTCTTTTAAAAATAGAGATTCTAAA  
ATGCATGAAACTTACATTTTACAGAGTGAGGAGTCCTTTATTTCCAAAGG  
AACTAGCATCAACTAAATGACATAAGAAGAGTTTAAGAATCCTATGTTTT  
CAATCTTCAAACGTAGATAGTTGCCCTTAGAGTTTGTCTTATCTAGGA  
ATAACATATTAGACTAACAGGCGGGTAGGTGAACCAAGCTACTTACACTT  
TGAAATTTAAGAGAACACTGCAAAATTTTAACTTTATCTGGCGTACACTT  
TCACCAATAGGATCAGTCTTTCTTCTAGTAAAAGCAAAAACATGGTCTCA  
GGCACAACATCCAAGACAACCTCTGGGATCTCCTCTAGTCTTGCCCCAATG  
TCATAGTCTACTTTCTCAGATTCACCTTTTCTGACCTTTCAACATACTGT  
ATACCCAAGATATTTCTATAATAAGAGGAATTAAAGCATTGGCTTGAGCC  
CTAAAATGACAACTCCTCTCTAGACAAATGGCTTTAGGCTACATCGCTA  
AAAACCTTCCTCCAGGTTTAAAGTCAAGAATTATTTGCTTCTGAGGATGGTT  
TACACTCACACTGTACTTTAACAATGCTCGCAGGTAGATAAAGTGTATCA  
GGATGTCAAATATGCTGAGTTTCAATTGAACTGGACCATGTCAGGTCTTTGA  
TTCAAAAACAATGAGATGGCATTACATATTATGTAAAAATAGAAAATGTGGA  
GAAAAATGTTGCATACTACAAGAATCATTACTGTGACCTCTTGCTAGAG  
GAGAAGCAACCAGACCACTCGAAAATTGAACCCATGAGAGCACAACAAGG  
CTGTGACCCCTGGCTGGTCACCCATATGAAGTGTGTTTGTGCTGACACTAC  
ATACACAAAATATAACTCAGTTTGTAGCAGACACTGCTGTAGTTCCGTACG  
AGCAAGTGCGTGCAATGAAAAAGCAAATTGGTGATAGCAGTAACTCAGTA  
AGTTTATAATGTACAATTGCCACTTGGAAAAGGAACACTTTCTAGTGGGA  
AAGCTAATAAGGGCAGACAATTGATGAGGTGAGGTAAAAGGTCTAAATTG  
ATGACTTTGGAAAACCTGCAAAATGATCATACTGTTACGAGTTGACACTTTA  
ACAAAACAGGTTTGAACCTGTGTAGGTGCACCTTTACACAGATTTTTTTCAT  
ATAAATGTGGTACAGTTTCAAGTAAATGTATTTTTTCTTCCCTCTGATGCTA  
TTAGTAGCATTTTCTTCTCTCTAGCTTATTTGATTGTAAGAATATGTATA  
TGATTGTAAGAATACAGTGTATGATATATATAACATACAAAATACATATT  
AATTGACTGTATTGTTGAGACTCCTAGTCAACAGTAGGCTATTGGTAGT  
TACGCTTTAGGGGAGTCAAACTTATACTTGGCTTTTCAAAGCTCAGGG  
GGTCAGTGCTGCTACCACTCACATTGCGTAGGGGTCAACTGTTCTTTTCAT  
TTAAGGTCTCATAGATGCTGTCTCTAACCATGAAACCAGTTGGTTTTTTC  
ATGGGGGGGAGCAGTTACTGGATGTGGAGGAACTAAAACAATAATTTGTCC  
CAAATAATTATTTTGTGTTGTCAGAAAATATACCCAAGCTTTTTTGCTTTTT  
TCTTAATCCTTTTTTCAAACACATGCTCCTATATCCCGGGTGTCTCTTAT  
TTGTTAGCTGGAAATGCCTAATAACATATCTTGCCATTGAAATGGCCTCA  
GAAGAGAATCTCTATTACATATACATTTTATGTTGTCTTTTGGGGTTTT  
ATAGGATAATATTTGATATCTTCATAGGCTTCCCTAAGGAGAATGAATCT  
GAATGAAAAGTCAGTTACTGGAATCAATATCTCTAGAATACAAATATATC  
GTAACCTATAAAATGTTACTTTCAAGAAGCAGCCTTCTATTTCTTCAAGT  
TTTGCCTGTAAAAAAATGTCTCTCTCAATGCTATCAGGCTATTACTATT  
TTGTCTATTCAAATATTGAAAATCCTGGGCATCCCTGGGTGGCTCAGTGG  
TTTAGCGCCTGCCTTTGGCTCAGGGCATGATCTTGAGTCCCAGGATCAA  
GTCCCCGAATCAGGCTCCCTGCATGGAGCCTGTTTCTCCCTCTGCCTGTG  
TCTCTTCCCTCTGTCTGTCTGTCTCATGAATAAATAAATAAATATT  
TAAACAAACCCAAATACTGAAAATCCACTGAGGCTGCAACATTTCTCAC  
ATCTAAATGAACCTTGTGCAATCCTCAAGCAAAAGAATCACGCATTTTC  
AGCATACACAACCTTGCAGCTCACACTCTAGCATGAGCCATAATAATAG  
CACCCAAATAATGTTTTACATGCGTATAACATGTCTTTCCTCTTTTAGA  
AGTATGACTTAGAGAAGTTTATCTGGAAAAGTGTATATAGACATGTGCAC  
GTGCACACACACACATGATGGAGTGATCTGCAAGATGTGATGTCACA  
CTATATATAACCTTCAAATAACCTGTGATTGGTATGAGGAAGACATGAAA  
AACTCTAAAGAACATATTTTAAAGAGTTAAAAAGCATTGAATATTCATTT  
TCCTACTCTATAGGAAAGGAGTTGAACATCTTACTAATTCATTAAGAAA  
AATCACTAGCCATTCTCTCTTATAAGATCATAGACTGTTACAGTCTTGG  
AGCAGGAAGAAAAGACCTGGTACAGTAATTCTACAGAAAGGACTTAGGAT  
ATCCAGCTTTCTAAATAGTGAAAATCCAAAGAGAAAACCTGTGACTTGTCT  
ACCATCCCAGAGCTATGTGTTGGCCTTGCTGAAATTAGGACCCAAGTGTT  
CTTGGTATACACCACCCTGTTTTCTTCTCCGTATGCTACCTTTACTT

CTACTTAATGTGAATTTTGTGGGGGGTAGAAGGGAAATAGTCTTTCTCCG  
GGAAGAAAGAAGCTCAAGTCCATGAGCAAGGTTGCTGCTGATTCAAGTTG  
GTTTCGATTGGAACATGGCAGACTGTGGTTTGCTTTATTTGGCCAGGAGCA  
TTTCTCTGTAACTGAGGATTCATTAGTTTGAAGTACTGGCCTTTTGCCT  
CTTTCCAAGGCCATTTTAGATGCAAATTGTACCCCAGACATCATTTTTAA  
GTGACAGGAAAATCTCTGGAGATAACAAGAATCAGTCTGTGAAATTTATG  
GACCTTTGCATTTTCTAATCCTTCTTGATAAATGACTCAGTTTCCAGCC  
AGGGTCTGAACTTAAGAGTTGATAAAGCATCAGCTGAAGTTGCTGGCTAC  
TAAATCAATGTAAGCGATGGCTTAATCAGCCTTTCTGCTCCTTCCACTGC  
CTTCCCCCAGAATTTCCCGCAGACTTCTATGGAGCCAGGTCAGCAAGAGAC  
AGCTCCCCAACAGACCATCTGTAGCCATCAGACAGCATGGGAAGAGAATG  
TTGACCAGCAGAGTGACTCAGTTCCTACTATTGAGGCTATTGGCATTCTGC  
AGAGCAAGACAGAAATCCTTAATTTAGAGGTTGTGGAAGTTTGGGGAGCA  
CTGGGTGTTTATACTGTATGTTGGCAAATCGAACTTCAATTAACAAAAA  
AGTTTGGGGAGGAGTTGTATGCCAGGGGGAACATTAGAGCAAAATGAGTT  
ACAGTAGGAGGTTGACAACTTGGTCATTTGAAGAGAAAAACCTCTGGTG  
ATACCTCGTACCTAGCTGGCTTTGAAAATCTCGAGTAAGAATTCATACCC  
AGGGGGGAGAACCCACAGCATATTCGAAGGTTTGCAAACCTTGTGAGTG  
GGGACAGAGCATAGCTTTTGATCAAGGGAAGGCCTTCTTCAGTTTTCTCC  
TCCAAAATTAGGTTATGGGAATTTCTCAAAAAGCCCATCTGCTCCTGGCA  
GATTGAGATGGGTGTCCACTTTTTTTCTTTTTTTTTTAAGATTTTATTTAT  
TTATTTGAGAGAGAGAACGCGAGCCTGATGCCAGGCTAGATCCCAGAACC  
CTGAGATCATGACCTGGGCCGAAAACAGATGCTTTACCAACTGAGCCACC  
CAGGTATTCCTGGGTTTCCACTTTTCTGAAACCAAAGTTTGGCATGTAA  
TTTTAAGTGTAGATTGACGTCACACAGAGAAATCTCTACAGCCCTTGATT  
GCTTACCCAGTGTGGCAGTTTGTTCATTAAATCGTGTTGCCCATATAA  
GGAGGTAGTTTAATTACAATGGAATAAAAGTGTAAACGAGGTGTCCAGTG  
TTTAGTTGAGTGTTTAACTGAGGTGTCTTTCTGCACCCGGGCCACGAAG  
AAGCCCGAGGTGCACCCTGGCTTGCTTGCCTTTGTGCACAGGTGAATTGA  
TAATTCACGACTCTCAGCCATCACTCCCTAAGCCTGACTCCAGGAGAAACA  
TGAAGACCGTGAGGAAGAAGAGGGAGCTGAGAGGTATGGCTTTCTCTATC  
CTGTTTGTAGGATCCCAGAGTGGTTGTCAAGGTAAAGTCTTACTAGACA  
GATGCTATGAACTGCTGCTTGACTAAGAATAAACCTACCATGAGGGGAAA  
GGAAGTCTATTTTGGGGAGACAGTAAGAGTTTCCCTATATTCTCTCTATT  
GAGGTCCTTTTGGTCTTCTCAGCTTTGGCGTTTAAAGTGAGATCCAAGAC  
ACAACAGCAAGACCACCTCCAGGGGGAGGCAGGGGGGTGTAGGGTTTAAAA  
ATGCAAATTCTCAGGTCTCAATTCAAACCTTGCTTACAGCAATTTCAAATT  
TTCAATTCTCTGTATGTACTTTAAAGCTTGAGAAACACTGTTTTTTTTTA  
ATAAATTTATTTTTTATTGGTGTTCAATTTACCAACATACAGAATATCAC  
CCAATGCTCATCCCATCAAGTCCTCCCCTCAGTACCCATCACCCAGTCAC  
CCCCACCCGAGAAACACTGTTCTAAAGAAAGCACCCAATAAAGCTTTTCT  
TCCTTGAGGGTCTTAAGACTTCCATGGTAGCCCAAGCTTCTTGTGGTCAA  
ATCTACCTCTTTGAAGAGAAATAAATTATATAGATATAAATATAAATATA  
GGTAAATAGATATACACAATTATGTGCCTATATGCATATGTGTGCCTATA  
TGAAAACCAAGTTTTCTCTGCATGAGATACTCATTGTGTTTTTTAATGAT  
TCACATGAATTAAGGCTGTTTTTCTCTCCCTCCATCCTTTCTCTTCCTCC  
TTCCCTCCACATACTACCTACTACCTCTTTCTCTCTAAGATACTACCTACT  
TCCCCTTGCTCTCCAAGATATGGAGAATCAAATCTATCAGTCCATAAACC  
TTCAGTATTTTAGCATGGAGACAAAAGCGTCTTCTCTTGCTGGTTTAAAG  
ATCTCTATGGAGGTGAGGGGTTGAGAGTCTGTATTCTTCGACATGAATGT  
GAGATTTTGTGGCAGACTGATTGATAAAGTGTCACTGCGATCCCCGCC  
TGAAATCACAATAAAGCATTCCTCAGGGCCTGTATTGAAGGCCAAAACCT  
TAATGCAGTGGGATCTCCTATAAAAAACATTAAACCTTTTTTCATAATTAAA  
AATTTAACAATTTAGTTTTCGGTTGCATGCAGGTTTCCCTAAATGGGTAGA  
CTTGAAAAAACAAAGCTTATTTTTTCATCTTTTTTGGGAATGTCCTTAAGC  
AGGTACAAAGAACTTTGTGGCCAGATGGGAGTTTGTTTAATAAACCAAAA  
GCTTGCTCTAAAACCAAGTTCCCTTTTTTTTAGTGGAATTTAAATAAATTA  
CTGAGTAAACAAATATTTACTTTTAGCCAATTGCTACAGTAGGAGACAGA

AATGATAGGTTTTCTAGTAATAATTTTTGGATTTTCATATACACACTTA  
GCTCTGTACTGCTTCATTTCAAACTCAGGGAAAATATCTATGATTACAG  
ATATAAACTGGTATCCCTGGAGTTTTAAAAATATTTTCTTCCAGATAATT  
TTCCACATCCAAATTTAGAGAGTAAATGATCCAATCCTTCCTTCTGATGG  
CAAAGGGGAAACACAGAGTAGAGGAATGCAAATTAGGTATACTCATAGTC  
AAATTGGATTTTTGAATAACAGTAAACAGTGATCATCATTAACAATAATA  
GTATTTAGATAAGGAAAATATTGTAGCTTAATGTTTTTCCAATATCGTAT  
CCTTTGGAGTTAGAATAACCACAATATTCTTCTTGGAAGTGAAATAATCC  
CACAGATCCAACAGATAAATGAATCAAGAAAAAAAAAACTAGAGAAAAC  
AAGCAGCCCATCTTTCAATTTCTAATTTATATGTCTGTACACTTTTTTCAT  
TTATGATTTTCTTATGACCAATGTCATAGCAACAGATCCAGAATGAGACA  
ATCACATTTGTGGTGAAATAGCAATTCACATTATTCTTGTTTTATGTCATG  
TCTCTAAGTACTAAAATACTGTAATGCACAGCTGGATAGTCAGAGAGGAT  
TCATCTATTATCTATCTATCTATCTATCTATCTATCTATCTATCACT  
GATTTATTTTTTAGGAGCCAGACAGGTATTAGAAAATACCAGCCAGGTATT  
TTCCAGGTCTCCAGGAAAGCAAAATTGAATGCATTTTTGTGTGTATGTGT  
ATAAATATGCTGCCAGAAAGGAAATTTGCATGGTATTATGTGCTTACACA  
GACTGAACTGGAAGGAAGTAATTTATGCAGATATATTTATGATGATTTAG  
ACTCGTTCTGCACATAGTATTAATTTTTAAAATTAATACTTATTTTAAAT  
TACACAAACAGCAAAATTTATTGGGAAACATTGTATAATTCAGAAACATT  
GTATTCTCTAGGTTTAAAAGGATGAGTATACAAATTACTAACCTTACAGG  
TTTACTGAGAGAGAAAGAGATGGGGAGAGAGAGGGTGAGAGAAGAGAGAG  
AGGCATGAATTTTTAGCAGAATGAACGTCCACTGATTCCATATTATTGAA  
TATCATCTAAGGGCTCAATTTCCCTCCCAATCGCCAAAGTCCTTTCTATT  
CCTAAATTTCACTAGGTCTTGCTTTCAATTTCTAATAAACAGTGTGATT  
AGGATATTTTTCCCTGAGAAATTTCAATAAGGAAACATATTCATATTTAA  
AACTGACAAAAATCCTTTTCGCACATTAAAGATATATGATTGTCATCCGTC  
AACAGAGAGAAGGTTGAAAGAATAAACAGCAATGGAATATTCAGAGTTAA  
TGGGTTAGAGTGAGGAACCTAGAACCTTTGGAAAATTTAGAAAAGTTTGC  
TAGGAAGTGTGAACTCAGCTAGGAATCCAGAAGCACATACATAAAGCTAA  
AGGGAAATAATATGAGTTCTCAATACTAGGGAGTAGGACACACTAGAAGC  
AAGCTTTGCTTTCTCCAGAACTTTGCCACTGCTAACTCTGTCAGAATTAC  
ACACACACACACACACACACACACACAAAAGGAAGCTGATGAAATGCT  
TCTGGAACAACCCGATTCATGGATTTTGAAATAGTGGATACATGTGCCAC  
CTTTTAGTCATTTCTGGCTTTTAAGTTTCTGGGCAAAATGAATAATCAC  
AAAGAGAGTACACAGAGTAATACATGTTATGAAGGACTAGCTAGTAATTG  
TGGTTAGGCTTCTGTGCAATATTTACTACCTGGTGGCCCCACCTGAGAGT  
GGCTCATGGGCAACTGCCCCCTCCCTTCTCTGCATCGCCACACCAGGCTGT  
GCCAGTTGCCTAACCAGTCCATGGCTCAGGAGGACTTCGCAGGTCCCTTG  
AGTCGCAGGAATCAATTCTTGCTCCAGAGACACTCTTGGCAACTTCAGGA  
GGTCCGGCAAAGATACAGTGGTGTCTTTGTATCTTGCGTTCTTCAAATT  
CTCTTCTACGTTAAAAGGTGACTTTCCCTGAGCAGGAGCTCCTCTACATAT  
CCCAGAGGCAAGGTGGGTGACAGCCGTAAATTTTGGCCTGTTTCCTGTTG  
GTTTGTTTTAATGAGTTACTTGCAATATAAACTCAAACCCTGCAATGGAG  
GGCTCCATACTAGGTCTTGAGGTTAAAGGTTTCATGAGGAACACAAATCC  
CCAACTGGCCTAGAGTCCAACATATGCTCCTGTTTTTCTTGAAAATCTGC  
ATGTATAAAGCAGGGCCTCTCTCTTTCTTCAGATCTATATAAGAATGGGC  
ACATACTTGATTTCAAGCCCAGGGAATGCAAAGCCCACATATCCGAACG  
CATCAAGGTAAATTAGCAACAAAAGTCTTTCCATTTAATAATATCCAAG  
CTGGCAAGAAGACAGTGTTGATATATGTAATTCAAGCATTTGCTCCTCTT  
CATATGGAAGCAAGTCTATCACCTGGTAATATCCACACTTCTTAGAAG  
AGTGTGTGCACTTAAATAACTTCACTCTTATTACACTAACAGTATATTAA  
ATCTATAATCTAGATCACTAACATGTCTAGGGAGATGAAAAACATCTATT  
TGCCCTCCTCTGCTTTGCTCAATCTTAAGATGGGAAATACTATGGTCTGAA  
TGTCTGTGTCTGCCCCCGCCCCAATTCAAACATTGAAGTTTTAAACCT  
CAAGATAATAGTATTAGACATGGAGCCTTTGGTAGGTGGCTAGATCACTG  
GGGTGGGACCTTAGGATTGGGATTCTGTTGTTATAAAAAGAAACCCAGA  
GAATTCATTTATCCTTCCACCATATGAGGACACAGTGAAAAGACCTCTCT

GTGAACCAGAACAAAGGCTCTCTCCGCAACCCAACCATGGTGGCATCCTT  
GTCTTGGAATTTCTAGTCTTCAGAACCATGAGAAATAAATTCCTGTTTTCT  
ATATGCCATCCAGTTTATGGCATTGGAATGGCAGCCGAAAGGACTA  
AGACAGGAGGGTAGGTAGGTACTTACTTATTTTGAAGAAGTTGTTATTT  
GTTTACAATCTCATCAGAAATTTCTGAGGGGATCCCTGGGTGGCTCAGCA  
GTTTAGCACCTGCCTTTGGCCCAGGGTGTGATCCTGGAGTCCCAGCATCG  
AGTCCCACATCAGGCTCCCTGCATGGAGCCTGCTTCTCCCTCTGCCTGTG  
TCTCTGCCTCTCTCTCTCTTTTTCTCTCTCTGTCTCATTAATAAATAAAT  
AAAATCTTAAAAAAAAAAATTTCTGCTCCAGGGGCACCTGGGTGGCTCAGT  
CCATTAGGCATTTGACTCTTATTTTTATTTTTTATTTTTTATTTATTTT  
TATTTTTTTATAAATTTATTTTTTATTGGTGTTCAATTAGGCATTTGACT  
CTTGATTCTGGCTCAAATCATGATCTCAGGATCCTGGGATGGAGCCCTGC  
ATCGAGCTTCCTGCTCATCTGGGAGTCTGCTTCTTCCCTCTCCCTCTGCCC  
CTCCTCATGCTCTCTTTCTCTCTCTCTCTCTCTTTTTTTTTTTTTTAAG  
AAATTTGTGCTCAGGGACAATATCCTTATTTTACAATTTTTTATACTGCCC  
AAAGCACCTAATGCAGTGCCTTGTAGATACATCTGTTGATAAACAAATGA  
ATGGGTGGATCTACTAAAAGAAGACCATAAGTGTACCTTAAAGTCTTAGA  
AAAAATGTGGCAAACAGACATTTAAATAAATGCTAGCTCTTATATTCATTT  
CCATAGAATGAAGCAGGTGGTTAGACGTGATAATCCTCTCAATTCTCCCT  
CTCGTTGTCTCTTGAGTGCATATATTTGGGGTTTTTGTAGTATGTCTC  
CCCCGCCAGCCCCACATTTATTTTACAGCTTTGTCTACCTTGGGCACT  
GACTCTCTTACCTCTGACAGGGATGCAGACACGGGCTTCACAAATAAATT  
GGAATCAGAGGAGCCCATGGCTGGGCTTTTAGAGTTAATGGACGGAGTAA  
TAAAAATGAACCAGAGATAAGTGTGCTGATTGCAGTGGCCAAGACATAGAT  
GAAGTGATGTCATGGGAAACACCTGGAATCTTGGTCAGCTCTCTTCTCAC  
TGAGAACGTGCTATCAAGTCTCTGGTCTGTGGTTTTGCCCCAAAACCCC  
AGGCAGCATCTGAAAAGAATGCACTGAAGCAACTCTTCTCTTTCTAAATA  
TATCTTTGAAAAGACACTCTAGATAGTCTGTTTAAATTTGGGAACAATTT  
TGTCAGGAAATGTATAGTCCATGTTACACTTAACAAGAAAGTGTTTATCC  
AAAGCGTTAATACAGATGAGTCATCTCACACTCAAATGCCAATTCTTTGG  
AGGTGGGATTTCCCGTAAACAGCCAGACACTTTGAACTTATGGTTTTCACT  
TTATGTCATACTCTAACCCTAAAACAACACACCACCATGGAGTTCTTCC  
CTGCTAAACCAAAACACACCCACCTCATGGAACTGACTCTGGAAAAATG  
AGAAAGGAAAGTATCTTTCTAGAGAAAGCTCATGTTTCATCTCCTGGATTT  
TTGATGGATCTTTCCCTGCAAAATAGGACCTGGTTACACTCAGCACACTGG  
TTTGAGACCCGGGAGCTGGCTCTAGCTAGGGTGAGTTGCTCTGCAAACG  
TTATCTACACCTACAAGGACCCAGGCAACTCTTGAGAGAATGACCTGCTT  
TGGGGATTTGACAACCTCTCAGCTTCGCTCATGAAAACAATTACAGATTC  
AAAGCTCCCTTTTGCCTTTCTTGCCTCACCTTCTCCATGCCTACGTTATA  
GTGCCATTACTTCTTCCTTCGTCCACCTTCCCCTGCTTGAAGGCAAGGGT  
CCCCATCTTAAGAGTTTTTTCAGTCTCCACTCGTAACACAGTCCCTCCCATC  
ACACTGGAAGTACTCCACAAATGCTTGTGAATAAATGAAGGAATGAGAA  
TCTTTTTATTATTTCAATGTATTCACTTCACTTAGCACTATATGAATT  
AGGTAATTGGAATTATGGTTGAGGACAGTATGTTGCTTCCCCTTGGTACT  
TTTATAATGTAGAGCAATTTCTATAAACTCTGGCCTCAGAATTTGGTAGT  
TACTTGTTTTGGGTATATGTGTTTTTCTCTAGAGCAGCCCTTGGAAATA  
CCAGTAGGATTAATAATTACGGTGATGTCTTTACGCACAACCTCAGTACACTG  
GAAGTATTGAACCAATGTGGCTATGCCTTTAGAACTATTTAAGTATCTG  
GGTATCAGTTAGTCAGGGCACCGTCTCTGTTTCATCTGACCTGCACAGCAA  
ATCTCCATGAAAATGATGTGTTAAAGGTGGAACCTTTCATATCCTGAGGA  
GACGGTGTGAAAGTCTGAAGTAATTTTTTGGCGTAGAATGAATGAGTGAT  
TGGGAACATTAGAGTACAATGTAGAATTTAATCCCTGCCATGAGCACGGG  
AAAGCCCTGGGCACAGTTGAGACTGCATTTTATCTGTATGAACAATGATT  
TTATCTGCATATTCCAAGTGGCAGCTGAGGGTGGTTAATTGGATTTTTCA  
GACCTTTCATCAATCAAGAAGGAGGAGAGATAAAAGGAAGAGAGAAAGC  
GAGGGATTTTAAACTTGAATTATCAAGATTTACTGCTTCTCAATTGCCA  
TGTCCCTGATGTGTTTTAATCACTTGTAAAGATGTGTTGAAAGGAACTCT  
TATGAGTAATAAAGAGTAGAAGTTTGTGAATGATTTATAGATAGAAATAT

ATGGAAGTGAATTTAAAATCTCTCCCTCTAATTTGCCGGGTGTTTTGTTTT  
GTTTTGTAAAGTAGGTTCTTTTATATTTTTTATTGAGATATAATTTACA  
CAGATTTTTTAAGTTCCATGAATTTTGACAAAAGCATACACCCCTGTGAGC  
CACACCGCACTTACCACCCCTCTTGGAAAACCCACCATTCTGATTCTTATA  
GATTAATTTTTGCCTCTTCTGGAATTTTCATGTAAATGAAATCAATTAGTAT  
ACACTAATTTTTATCTACCTTCTTTATATTATGAGACTATCCTGCAATATG  
TTTAACCATCCTCTTCATGGACATTTGGACAGCTTTAAGTTTTTGTCTAT  
TACAAATAAAATTTCTTATGAACATTCTTGCATGCGGTATTTTTTCTTGCA  
TGTGTTTTTTGGTAGACTTATATTTTTCTGTTTTTGTGGCTAGATAACCAG  
AGGCAAAATTCCTGGGTACAGAGTTGGTAGGTGTATATGTAACCTTTATG  
AGAACTATCATAGTGATTTCTGTGTTTTATTTTTATTCTTATTTTTTAAG  
AGGAAATGTCCATCTATTTATTTATTTATTTATTTATTTATTTATTTATT  
TATAGATTTTTATTTATTTATTTATTCATGAGAGACACACAGAGAGAGAGAAG  
CAGAGACATAGGCAGAGGGGAGAAGCAGGCTCCATGCAGGGAGCTCCTGAC  
ATGGGACTCGATCCCGGGTGTCCAGGACAAGGCCATGGGTGTAAGGCGGT  
GCTAAACAGCTGAGCCATCCGGGCTGCCCTGATTTCTGTGTTTTCTATTCT  
CACAGCAGTATTTGAGAATTGTGGCTGATTCACATTCTCACTAATACTTG  
ATGTTGTATGACTTCTTTATTTTAGGCAGGCAAAGGGGGCATGTCATGAT  
ATCTTATAGTCGCTTTAATCTGCAATTCCTAGTGCGTGTATGATGTTGAG  
CACTGTCATTGTTTTGGGCTGTTAGAGCAAAAATACCATAGGTTGGGTGGC  
TTATAAGAACAACCTCTATTGTTGAAGGACTTCTAAACTGCTCTATTAC  
TTACTTGGGTGAGATTCAGTTTTATCATATGTAAAGTAGGGATAATTTAC  
CGTCTTCAAGATACCATTAGGAGAATAAATCATGCGCATACAGCACTCAC  
TTAAGTACTACTAAGTAAATTGCAATTGGCGTCTATGAAGTGAATGGGT  
GTGACACAGATCTTCCAAGAAAACCATCTCTATTCTACTCATGACTAGGT  
ATGTCATCATGGCCCCAGAACACTTATTATTCACCCATCAATGGATGAAT  
GGATAAAAATGATGTAGAAATATACATAATGGAATATTTCTTCAGCCACGA  
GAAAGAAGGAAATCCTGCCATTTGTGACAACATGGATGGATCTTGATGGC  
ATTGTGTAAGTGAATAAGTCAGACAGAGAAAGACAAATAGTGTAAGATA  
TCACTTCTATGTGGAATCTAAAACAGCTGAACACATAGAAACAAAGTAGA  
ATGATGGTTACCAAAGACTGGGGTGTAGAGCAGCTGGGGAAATGCTGG  
TCGAAGGGTACAAACCTGCGGTTAAAAGATGAATAAGTTCTGGAGATCTA  
AGGCAGCATTGTGAATATAGCCAGCAATACTGTATCATAGGCTAAAGTTC  
TAAGAGAGGAGATCTTAAGTGTTCTTACCCTGAAAGGAAATGACAATTAT  
GTGAGGTGGTAGATATGTTAGCTACTGCTACAGTGGTAATCATATTCTAA  
TATATAAGTATATCAAAACAATACCTTGTACACATAAACTTACATAATGT  
TATGTCAATTCTATCTCGATTTAAAAATCTCTCTTTTTTTGGAAATGAT  
ATCTGTGTAGACTTAAAGTTTCAGTCTCAAGATTTTTTTCTCAACTCTTC  
TATCACTCATTTAGGTTTTTTTTTTTTTTTACATTTTATTTATTTATTCAT  
GAAAGACATAGAGAGAGGCAGAGGCACCGACAGAGGGAGAAGCAGGCTCC  
ATGCAGGAAGCCCGATGTGGGACTTGATCCTGGGACTCTGGGATCACACC  
CTGAGCCAAAAGCAGACGCTCAACCACTGAGCCACCCAGGCATCCCCATC  
ACTTGTTTTTAAAGTCCCTGAAAAGACCTGTATTATCTCTTCCTTCTAGC  
AACAACTCTGTCTTATGTCTAAAAATAACTATTCTTGAGCACGTAGGTG  
GCTCAGTCAGTTAAAGCATCTGACTCTTGATTTTCAGCTCAGGTCATGATC  
TCAGGGTTGTGAGATTGAGCCCCATGTCGGGGTGTGTGCTCAGGGGGAGG  
TCCACTTGAGATTCTCTCCCACTGCTCTCTCTCTCTCCCCCTTTCTCTC  
TCTAAATAAATAAATCTTTAAAAACAATTTTCTGTGTAGCCTTTTCAATTTT  
CAACTCCATTTGTGTTTTTCATATGGAAAGTCTATACTAAGGACTAAGTTA  
CATTAAGAAGTGGCTGACAGCAAGTTATTTGCATCACCCAGGCAAATAA  
AGATACCTGGCTCCTTGACATCTTTCTTAGTTGTCTGTTTATTCAACGA  
GGTAACCTGGAAAGCATTTTCATTTTTCAGGTGTTCAATAAATACCTGACAAC  
TGGTTACCAAGAGTTTCAGCTACAGTCTATGCAAAAAAAGAGATTAATGT  
TATACTGCACAATTAGCATATCTGGCAAATGTAGACTTGGGTCCACATTT  
ATTGATGTACCATTTCTAGATTTAGAAAGAGCTTGAGATGGCTTACAT  
ACTTTTTTAGTAGATAAGCTAATATGCACAAATCAATTTGATTTGTACTA  
GTTTCAGCCAGTGTGTATGTTTCCAGATAAAAAATATTATCTCCATTTAAA  
TATTTATTTGCTCATTGTCAATGTCAAATTGTGCTACAAATGCCTGATCA

AAGATGATTAATAATAATGAAATCCTTAATACAGTTACTGTAGAGCTCAT  
CATTTCCCTTGTCTCAGGCCCAATTATAAACTCTATATTTTCACCATTTC  
TTAAGAGATCTTAAGAGTCAAAATTTTAAATCACATGTACATTCCCTATT  
AACAAATAAAATAGTAATAATACTATTTATGAATGTTAGATACTATACT  
ATTACCTAATAAGTACTTATGCTGATATTGTTGAAGGCATATTTTATCCT  
TAATTTATAGATAAGAATCTCATGCATATAGAAATTACTTATCCTTCCAA  
TATAAGTTATAGAGCTGAAACTTCACTATAGGTCTCTCTAATGCCAAAGA  
CCAAGCAACTAAATGATATTGAAAATTCGGGATCCCTGGGTGGCGCAGCG  
GTTTGGCGCCTGCCTTTGGCCCAGGGCGCGATCCTGGAGACCCGGGATCG  
AATCCCACGTCAGGCTCCCGGTGCATGGAGCCTGCTTCTCCCTCTGCCTG  
TGTCTCTGCCTCTCTCTCTCTCTCTGTGTGTGTGACTGTCATAAATAA  
ATAAAAAATATATATAATGAAAATCCACATGCAAGTTTCAGAACTGGACA  
CAATCACAAATCACAAATTTGTGATCAATGATTAAAGGATAACAGGACTTG  
GTTCTCAATCTTGCAACAGTTTTTCTTTGATATTCTTAAAGAAATGTGATC  
TCATTTCAATTATTGAATCCATAAGAATAGATGTCAATGTAGGTAGTGGA  
GGTTTCACACTAAGAACTTAACTTTCTAAGTAGCCATATGGAGATATCA  
GGATGACAAAGACACCTGTAATTTTAATCAAAACATCAAAGCTCCAAAGC  
AAGATGGCTTCTTGAGTCTATAAGACCACTGAGGGTAAAAATCTGATTTA  
GTGAAATATATTTAATTTATTTTAAGATACAAAGTTACATCTAAAGAAAT  
CTGGCATAACTTGTGCAACTATTATATCAATAAATCTTGCTTCAGTAAAG  
AGATTTTTAAAGTAAAAATTTAAAACTATTTTAAAGGCATTTTAAATAT  
CTAAATATTTTATGAAGATTTAAAGATGATAAAAAATCTAAATGTCCATA  
GAATTAATTAATACAGATGATCTGAGTTTGCTGTTTTGCAAACATGGGCA  
AAAAATATGCTGCTGCTAACGATTATTCAATGTTCTAGTTAACTTCAGAT  
CATATGAGGGTGTGGAGAAAACTGATAGAATTGTGTTTCATCGTGACCTC  
CCCAAGCACCTAGCACATGGAAGAGAGTAGAACAGGTCAAACAATAGGAC  
TTGTGACTGAACAAAATATGGGGCATTATACATTATGTAGCATTAGCCAT  
GTGTTGTTACCTTGGAATAAATTTATGACGAAACATAAATTAGAATTA  
ATTACCAAACATTCACTACTTGAAAATACTGCATATAATGATATTTATC  
TTTTTAAGTAATTTTTTTTACTATCCTATTGCCATCTAAATGTTAAACATT  
AGATAACCAGAACATTACATGACTAGACATAATGGACAATTTCTTAGGAG  
ATACAACTACTGGATTGAGTCAGGAAGGAAATCAGAATATACCTGTAAA  
AATAAAAAGCCTGGATTACTAATCAGAAGTCTTCCACAAAGAAATGTCC  
TGGCCTAGATAGCTCTACGGGTGAATTCTACCAAACAGTGAGATAAGAAA  
TAACACCAATCTTGCAAACTCTTCTAAGAATAGAAGGGGAATACTTCTAA  
ACTCATTTGATGAGGCAGATTTTACCCTTACATAAAAAACCAACAAAGAC  
ATCACAAGGAAGGAAAACGATTAAACAATATTTCTATAAATTTAAACCT  
GAAAATAAATTACTAGGAACTGAATCTAGCAGTCTATAAAAAGGGATTA  
TACACCATGAACATATCAGACTTACTCAGGATTGTAAGACTGGTTCAACA  
TTAGAATTTCCAATTACATACACCATTTTAAACAGAATAAAGGGAAAAGAGC  
ACATGATTATCTCAATCAACAGAGAAAGAATATTTGACCAAATCATCACT  
TTTTCATGAAAAAAAAAAAACTACCCAGCAAACCTCAGATGGAAGGCAAC  
TTCTCTAACCCAATAGAGTGTCTATAAAAAATTCTATAGCTGGTATCATAT  
TAATGGTGAAAAATTGAAAGCTTTCTCCCTAAGATCAGGAACAAGACAAG  
GACATCTGATCTACCAATTCTATTCACTATTGTACTGGAAATTTTAGCC  
AGGGCAACTGGGCAGGAAAAATTAAATAAAGAGCATCCAGATTGGACAAGA  
AGAAGCAAAACTATCTTTATTTGCTGATGACATGAGCTTGGGTATGCAAA  
ATCCTAAGGAATCCATGGAATACTATTAAACATAAATTAAAGAGTTCACT  
AGAATTGTAGGGTGTAACATCAATATGCACAAATCAATTTGATTTTTTATA  
CACTAGCAATGAAAAATTTGAAAAATAAGAAAATTCCGCTTACAGAAGAAC  
CAAAACAATATGATCCATAGGAATAAACCTAACCAATAAGTGCAAGCT  
TACAGTTTGAAAAGTGTAATAATTGCTGAAAGAAATTGAAGAAAATCTA  
AATAAATAAGAAAAAATCCCAAATTTATGGATCAGGGGACTCATTTTTTA  
TTTTGTTAAATGAGAATATGCCCAAAGCCATCTATCTACAAGTCAGTG  
CAATCTTTATCAAAATTGTGACAAGCTTTTTTTTTTTTTCCAGAAAATGAT  
AAGTTGATCCTAGACTTCACCTGGACATTTGAGCAATAATTCAAGCAACC  
CAGGATAGCCAGAGCAATCCAGAAAAGAACACAGCAGGAGGACTTACTTT  
TCCCCATATAAACTTTTATCACAAAGCTACAGTAATGAAAACGTGTTGGTGG

TGGCACACAAGGATAGATAAAATAGATAAAATGGGGTAGAACTTAAAGTCTA  
GTCATACACTCACATTTGTGGTCAATGATTTTTTAACAAAGGGTCAAGAT  
GATTCAATATGGAAAAATAGTCTTTTTTTTAACAAGTAGTGATGTGATAG  
TTGGGTAGTCACATGCAAAAGAATGAAACCAACACTTTCCTTGCACCAT  
ATACTCATTATCTCCAAATGGATCGTAAACTTAAATGTAAGAGCTGAAAC  
CATAAACTCTTAGAAGAAGTCCGGGAGTAAATTTACATGACCTTGGGT  
AAACACAGCTTCTTAGATATGACAGCAAAACCACAAGTGATAAAAAATA  
ATAAATTGCACTTGATCAAAAATAAAATTTATGTATTCCAAAGGATACCA  
CATGAAGAAGTTAAAGACAATCCACAGGACAGGAGAAAATATTTGCAAA  
CCATATCTTTGATACAGTAACTGTATCTAGACCATATAAAGAATTCTTAT  
GGGGTGCCTGGCTGGATCAGTCTGTTAGGTGTCTGTCTTTGGCTCAAGCA  
AGTCATGATTTACAGGGTCTGGGATGGAGCCCTGCATCGGGCTCCCTGCT  
CCATGGGGAGCCTGCTTCTCCCTCTCCTCGCTGTCTCATGTTCTCTCTAT  
CTCTGCTGCTATCTCTGTATCTCTCAAATAAATGAATATAATCCTAAAAA  
GAATTCTTACAACCTCAATAATGAAAAACAAATACAGAGCTTTAAATAG  
GTAAAGTAGCCGAATAGACATTTCTTCAAAAAAAAAATAAAATAAAAAA  
AAGAAAGAAAGAAAAAGGAAGAAGAGAAACAAACATTCAATAAGCACATG  
AAAAGTTGCTTGATATCATTATACAAGGATCTGGGCAGAGGTTGCTCTAA  
AGATATACAAATGGCCAATGATCACATGGAAAGATTCTCATTCTCATTAG  
CCATTAGTGAATGCAAATCAAAGGCATGATTTTATGTTACATTTTATACC  
AACGTGATTTTATGCCAACACTCATTGGCATGGCTCTAATGAAAATGACA  
GAAAGTAACAAGTGCTAGGGATGCTGGAGAGAAATCAAAATGCTTACACG  
CTGCTGGTGAGAACGTAAAAATGGTAAAACCACTGTCAAGCTGTTTGGCAG  
ATTCTCGTCAGTGTAACATAGTGCGACCCAGCAATTCCATTTCTAGATA  
TATACTCAAGAGGAATGGACACTTATGCCAGCACAAAACTTGTATACGA  
ATGTTTACAGCAGCTGTATTCACAGTGGCCAAGAAATGGGAAAAACCCAA  
ATGTCCCTTGACCGAAGGATGGGAAAATAAAAGTAATGCATTTCATGCAG  
TGGAATAGTATTTGGCAATATAAAGGAATGTATATAGAGATGAACTTTGA  
AAAATATCACGCTTCGTGAAATTATGCTGAGTGATTACATTTGTTTTCAA  
AACAGAAAGAAAGAGAAACCTCAGCTCAACCCATGCTGGAGTCCTCACAC  
TTCCTGACATGTCACTGTGGAGCGTTTAATGGTAGGGACCTCTGAACAAC  
AGGATTAAAGACACACTAAATTTCTATTGCTACATTCCCCATGGCTGACCC  
ATACTGTTCTTTTATAGTAAAGGATTCACCTGTAAGAGAGATATGAGTA  
GGGCTAGTCTGTTTACCTAGGTGGTAAAATTAAAGCTCTCATTTTGTACT  
TTGTGGGAGGGCTTGTAATGCGTAACTCTTCTTTACAATTTCTCTGAGT  
ATCTGGTACAAAACAGAGGACATCTCTTCTTGAAATCCACCAAACCCCT  
CTTCTCCCAGGAAGAGTTCACAGAGGGTCCCCATGTGAGTGATGAAAAT  
GCTCTTTACCTTGAGTTGTAAATTCCTCCCAGAGCTTATTCATAAATGAC  
TAGACAAAGCAGCCACAACATAATTCACCTTCACAGTCTATTTCTCCACT  
AGTATTTAGACACAACCTAGGAATCCCTGCCTGCATTTGGTACTACAGATA  
AAATATTTGATAGACAGAGCAGTAAGGTAGTTAGATAAGCAGATTGAAAA  
TACTCTGGAATATGTACACGTTGTAGGAGAACAGATGCAAGGTGTTCTA  
GGGGCTCAAAGAAAGGAAGCTAACCCAACTACGATGGTCAAGGAAAGCC  
TCTAGCAGGCTTTAAATTGTCACCTGAAGTCATAATTTGCTTCTAAAAAG  
GATGGAGAGGAGAGGAGGGCAGAGGAAGGGCATTCTTGACAATTATTAAT  
GAGATGAAAGGCAGGATGTTGGGAGAACATGCATGTGTGGTCATCTGCAA  
GTGGTGAGACACATGAGATTATTAGCGGGGCTGCCCATGAGCTGAAGCAA  
AAAATTGATGACTCAGATGAACCTTTATTCCAAAGAGTTCTGAGTTTACAC  
CAAAGGCGTGTGTGAATTTTGAAAGACCACTCTAACTAAAGCATAGGAG  
ACAGAGTAGAGGGACATAAAAGTGAAGCCGGGAAAAAAGCAAAGTCTAC  
TGGCATTACCAAAGAAGCTTCAACCTGAACAAAAGTAGAAACACTTGAG  
ATGTAGCAAGGGATGGATTTTAGAGCAGTTAATAGATATAATGACACTAT  
GGGTAATTGGGGTAAGGGAATGAAGGAGAGGGATGGTTTAGGGTGACTCT  
CAGCATGCTCTTGTGAACAGCTAAAGACAGGAAGACAGAATCATATAATT  
TATTGAGAAAGGGAGGTTGGAAAAGCAGTGTCTATTTGCTCCATGAAACA  
AGCTGAGATGTGCTTGGCACACATTTTCGTTTGTGGTGTTCCCCAAATATC  
TAGAAGGTTGTTGAGCACAGAACCTTTGTAGCGCAGGAGACTCAATCACAT  
GCAAGAGAACACTGGAGAGTCGTTGTCAATTTAACTGATGAGGAGGGAAGA

GTTGTTTCATGGAAAAGACCAAGAATGACCAGAGAGAAGTTTTGAAAAAGA  
CTGTTAAATGAGAACATCATAGACACCAAAGAGATGAGGTATTTTCAAGG  
GAGGAGTCAAGAGTCTCAAATTAGGCAGATAAGTCATGTCACAATAGAGC  
TGAAAAAAATGTCCCCTAGATTTTTTTTTTTTTTTTTTTTTTTTTTTTTT  
TAAAGGGCATGCTCCAGAATTTTGTGAGAGCCTTCCATTGAAGTCCCCAC  
ATCAGGCTGGATGGATGGCAAGGTGGGGAGTGAACGGACTGGGAGCTGAG  
TCAGTGCAGAAAGTGAATAATCACTGCAAAAACATTGCTGTGGAAGAGGA  
GAGAGAAATATGGACATAAGCGGAAATAACTGTGGACATTATTTATTTCT  
CTCTTTTCTTTTACATTTTAGTGGGATATTTAGATTGCTTTTATGTTTAG  
AAGAAGGAGATGGTGGACCGAGGGTTAGTGCTATTGTTTCAAGATGAGGA  
GAAATACCAGAGACACATCTGAGAAGAGAAATGCCATGGAGCACAGCAAG  
AGGAATGAAGTTTGTGCAGAAGAGCTACCCCTTTTTCTTCGAGGAGGGAG  
GATAGATGGAAAAGCAGATAACTGAGTAAACTGTTGCTTATTTCCCTTG  
GAAGTCCCAAACAGTAAAGAAAACACAATCTCACTGACCAATAATTGATGA  
TGCCATGTCCAAGTGTCTCCGTCTGGCAGGAAGAGCATATGATTTAAGAT  
CGAGGATCTGCCTCCCTGTCTGCATCGGGGCCATTAGGTGGGGAAAAAAA  
TAGGCTTGGTGAGTGGGGGTAGGTAGAGGGGACAAATGAACTCTCCCTGG  
GTCTGATCTCACTATATTTTTATCCTCCAGGGAAGAGAACAGATGTTCTC  
TTTTTTGTTGAGAAAGCATCATGCTTCCCTCCCCAACTTCATTTTAAACAA  
GAGGTTTCAAGAGAGGCCACCCACAGCTCCGAGTGTTCCCACTGAGAGGA  
AAAAATAATGCCAAACCCATGTGCTCTGAGCAAGGAGGAGCAGCTGAAGA  
GAAAGGGGGGGGGGAGAGAAAAAAAAGACGACTTTATAACCAGAACTCC  
TTGGCTGGATTAGGGGCAAAGATGACATTAATTTTATCATGCTTTTACTC  
TTATTATTTTTCAACCACTAATAATTCATTGCCATTGATAACAGACCATG  
TAACAACCTTGTTAGTGATCATCCCAGTTTACTAAGCCCAGAAAGTCTGGA  
AGTTCTTAGGAAAAAACTGTCTAACATTATTTTCTCCCTGGGGATTAACA  
TGGCATTGGGGATGGTATAGAATCCAGGTTATAAAATAGTAAAAAATGAT  
GAGTACTAACAGTGGTGAACAGAAGTTTTTTTTGTGTTTCCATAGGAAAGC  
AGGTGAGAACTGAGAAATCTGGAGTCAGAAAAAGAAAAAAAATCTAGA  
TTATAACACCACCTGTTGCCTTTGGCAAATATAGCCTTTGAGAAAATTAT  
TTAATATTTCTATGTATCAATTTTCTCAACCAGAAAAATACTTAGTCTAAA  
ATCACATTGTTTAGGGTTAAATAAGTGGATAAATGCAAAATATTACATATA  
CTTATATTTAATATTATTTTATTTAATATTATTTTATTATACATTTAT  
ACTATGTTTATTTACTTATTATTACATAATTAAGATCTTACCAGAAAACA  
GAATTCACAGATGGTTCAAGTGTGTAGACACTTTAAAGAAGAACTACTT  
TTAGAGATAAAGATGGGATAAGGGCATGTAAGGGAATAATAGTAAAGTTT  
GAAGAGACTTAACAATTGTGGGAAGCCATTAGCACCCCAAGGGATGCGGG  
GACAAAACAGTGTACCAGAGGTAGCCAAGATCTAAAACCACTGGAACCA  
TGGAAAAAGGGATGCCCAGGCGGGGTCCTAGTCATGAGGGCATATAGCC  
TCTGCCAGATTTGATGTCTATGCAGGGAGGAATCAGGAGAAGGAACTCCT  
GATCTTATTTTCTCCCATCTGTATCCTTTTTTGTATGTCTGCCATTGGCT  
GAAGGCAACAGAATCTAACCAATGAAGCAAATTGGGTGATGCTTTCTGCA  
AAGGTCAAAATTCAGGGCACAGAGTAGGACACAGAAGAGTACAGAAAAA  
TCTTGGATCAGGACAGCACTAAGTAAAATACTAAAAGATAGTTCCCTAGAA  
GATAGTAAAAGCTTAACAAATATCACCTAAAATTGTTATAACTCTCAAGT  
TGACTGTGTTGATGAAGAAGGAGATGATGATGGTTATGATCAGGACCATG  
TATTATAGAAAAGCCTAGAGAAGGAAAGTTTGAGGAATGCATATATTTAT  
GTCTTTCTTTATTTTTTTTTTCAAATAAAAATATTAAGTGCTAGGCATGTGG  
CCAGCACTAATCTCCAAGGATTACAAAGGATTGATGGAGGACACAGATAT  
GAAATTGTTGCAATACAAAATGATATGTTCTGGGATGCCTGGGTGTCTCA  
GTTTAGAAGTGTCCGACTCTTGATTTTCAATCAGATCAGGTCATGACTTTAGGGC  
AATGAGATCGAGCCCTGCATCAGGCTCCACGCTGGGTGTGAAGCCTGCCT  
AAGATTCTCTCTCACCCCTCTCCCTCTGTCCCTCCCTCCTCTTTAAAAAA  
ACGAACAAATAAATGTTCAAATGTTTGGGGAGATACATATCCAGTGCTTA  
AGACAGTACATTGGCTTACTAAGAAAAATTTGGAGAAGTTTCTACACAAAA  
TAGTTTATCATATCAGCCTGAGATGAACATTTTCATGTACTGATATAATA  
ACTAACAAATTGTATGACATGGAATTGCATATGCTTTTTTAAAAATTTT  
TTTAAATTCAGTTTGCCAACATATAGTATAACACCCAGTGCTCATCCCAT

CAAGTGCCCTCTTTGATGCCTGTCACCCTGCATATAGTTTTCAATAGAAA  
TTCCAAACTAATGTATATTACTAAAACAATGGAAATAATAAAATGAAAA  
AACTAAACAAAGAGTAAAAAAAACCTATTTTTATTGAATAAAATCTTAT  
ATTTTCTATTCTTAAAAATTCAGAAGCACCATCTAAATTGTTGGTTTTTT  
TTTTTTAACTTTCTAAGGGTGTTGACTTTTTTCTTTGTGAATTATGACCA  
TCGAAAGACACACAAAAAATTTATTTTCAGCCCTGCTAAAGCTAAAATGAT  
TTTAAAAATAATATTTAGTGTGTAGCTTTTATACATATCACTAGAAATAT  
TTTCACTGACTTTAAAAATGTGCTTGAATTTATATTTAAGGATTTATGTA  
ACCTAAATAATAGAGAGTAAAGATAAATAAAGCTCAGTTCATGCAATTTT  
TTCTTTTCAGTGATAGGGAAAGTGAGACACAAAGAATCTAAGTACCTGGT  
ATTATGTAAATATATGGAGGCATAATTTGAAGCCGGTGTTTCACCATTTT  
CTGTATTTCTTAAAGTCAGTGGTGAAATACAGAAAGAATAATTTTCCTTTG  
ATACATCTCCAATTCTCTTATTTGTTATTTCTCAATGTTTTATTGCTGGA  
AAACACTAACATAGACCTTAGTTGCTGGATGAATTAATCTAATCTACATG  
GTCAGTTAACTCCATGCGTGATCTTCTGGATGTTTTTACTTTATCTCTT  
CAAGGCTACACTTCCCTCCGGTTTGTATGGAGAAAGCAGAGTGTGAGAGCC  
TTGAAGCCATTCACTCATGTTCCCTGTCTCCTCAGTTTGGCAGCTTTGCTC  
AACCTGACTCTTCCATAGCAGGTGTTTCTTGACATGAATGACCAACAAA  
CTGTATGAATACTTTCCGTTTTATTTATGGGGAAAAAAGTTAATGTTACA  
CTGAAGTTAAACTTTTCGCTAGGTATTGCTGGAAAATGGGACACCAAAGG  
AGTCTCAAGGTGTGTTTATTCCCTCTTGAGGGAGGTGTGGCGAATACAGA  
GAAAGAGTTTGGAATTTGAGGTAAATGTTTTGTAAAATGTGAAATATAA  
AAGCATATCTCATGTATAAAATGATTCTTATATAGTATTTCCATGGATTT  
CTGTATAAAATTGAAATACAAGATAATAATAATGACAGCAGGAGGTAGC  
ATCTCATTTATAAGAACTTCTTACATAACTTAACTGGAAAAAAAAAAAA  
AGTATAGTATCTTCCCTCCCTCTCCATCATTATCCCCACTGGCCATTAAAT  
GGACCAAAGTTGAAGAAGGTGGCCTTGCCTAAGAATTTTAAAGGATTTA  
GCAGGGCATGACTTCATGGCTTTCAAAGACCCGGGCAGCTCACTGCTCAT  
GTTGATCATGGTCAAAGCTCTCAGCAGGGGTACCTGTTCTAGGGAGGAG  
CTGAGGGATTTGTGTGGTGTGTGTGCTCTAAGAGGAACAGAGCACAA  
AGACAGGAAGTGGGAAGAGAGAAAGGAGGCCTGAACAGTGCGGCAGGTTG  
TTGAAGCTTCAGTTGTGCTAAGAGGCACCTTGGCTCAGCAGTCTGTCCCG  
CAAATGATGGACTTTCCATTCATCTGTTTCACTATCTCTGCTCTTTGCAA  
ATGATTTCTCTTCTACTTGATGCCAGGTGGGAACAGACTCAAAGTGCCTC  
CCAGCTCTACGTAAAAATATACTGGCATTCCCACTTTCTCTTTGGCTTTG  
GATAAGAATACATTTCTCGTCTTTTCCAATATAACTTCTTTCTCTGTTCT  
GGGTCCAAACCCCTCAAACACCTGGCCCGTATGTTCTCTTCCCTCTCTGTA  
GGCTCCTTCCCTCTGTGATAGCTTGTCTTAAACAGCATCAAACATG  
TTGAACCTTCATCATGCTTCCCTCCCCTGATGTATCTTGAAAGAATAACA  
CCAGCTTGTTACAAATCCTTCACCTCCAATTCATTGTTCAACCCTCTTCA  
TCTTGGGTCCATCCGCTACAATTGCATTAAAATCGCGATTTCAAGTCAAC  
AATGACCTATGTATTTAATCCAATGAGCAGTTTTCTTCTTCTTTAGCACT  
GGAACCTTTGGCAATTTTGAGATTTTTCTTCTTCTTCTTCTTCTTAAACC  
CTCCTGGTTAAAGCTCCCAATCTTATAGATTGGTGATCATAGCACATATG  
ACTCAAACAGCACCTATACGCCCTAGCTCCTGCCTCATGCTCTAAACAAC  
TATATTTCTCTCTATTGGCTTTGCCAATTAAAGGCCCCAGAGTAACCCAA  
ACTTGAAATGTCTACAAGTCAGTCCTTCTTACTTCCCCGAGGTCTTCAAG  
TCCAATTCTTTTATTACCATCTTAAGGAAGCTGCATTACCACCCAGCAGG  
TCTCCTGAGCTAGAAATCTGCCATGATGTCCTCCAATTCATCACTCTGTA  
TACCATCAGGTCTGTGGTTTCTCCCTCCAATGACTCTCAGGGCTGGTTC  
CTTCTCTGAATCAATATTTTATTTTCTCAGACCTCCATTATTTCTTTCCCGA  
ATAATGCATTTGTCTTCCATCTTACTATAGATCTGATTAAGGAGTCACC  
CCATTTCTACTGCTATAAAATGTAAATACGATCCTATTATTTCTCATTGGC  
AACCTTCTGTGTGTCCTTAGACATGACAATACCGAACTAGTAGGCATG  
ACATACACATCTGGTGTCCATCCTTTGATACATCCTCCTTCCATGACCTC  
ATCTCTTTATCCTGCCTTATAAAGCATCCAATAGCCATATTGAGTTAACT  
AAAGTTCCCTGAAATGCACCATAATCTGAGAGAGCTCTCAGCATTTTGTGC  
CTGCTTTAGCTCCTTCTGGAACCTCCTGCCATATTCTCTGACTTATTTCT

ACAACTTTGCTGAACTCCAATGTGGCAGCATTTTCTCCAGAGTGCCTTCC  
TGGAACCTCTCTTGCTGAATTTGATGTCTTTCTTCTGTTTTCTCAGACTAT  
CTTTTGCATATTGATCATTTTATAACACTGCATTTTAATGTCCAGATTAGT  
CATTTGCCTTTCCCCCTAAAATGCAAAATCCTCCAATTCCTAGCCTATGA  
CTCCCACATCTGCATTTTAAATACCTAGTAGTGAATCTGACACCAAGGAC  
ATGTTTGCTATATAGGTATTGACTAAACCACTACTACAATCTCAGATAAG  
ATGCACACGTGTATTACAATTACAGACTATATTGAAGTTAACGTCAGCCA  
CTGGATAATACAAGTCAATTCATTTGCTTATTTGTTATTATCCTGCCAAG  
GTTGATTTTATATATTTGCTTACATCCATGTTATTGTGCTTAGGATAAAA  
TGGTGACCTCCCGTTTGAATTTACATATTTTGCTCTCACAGCAGGGAA  
CTATACTAAGTCAGCATTTTTATGCCTCAAACCTACCTTCAAGGCATAAGG  
TCTTACTTAAATAATAAATGATCAGCCTTCAAGCGTCAATTAGAATCAG  
AATCATAATAATTTCTTTCTGGAAAGGACAGTCTTAAGAGACATGTATTT  
CAACTGTAGTTGAACTGACTCATGAATTTGATAATTGTTCTTCCTGCTGT  
GAGTGTTAGCTTTTTATTCTTCTCTTAGTCCAACATTATCAAGTCCCCTGC  
AACTGTAGAATCTGTGCAAGTCACTCAAAATTGTTATACAAAAATGCACA  
CTTATGTAGAGGCTGATTCAGTCAATTCAAAACAGTCTGGAAAAAAAAGA  
AAATTCAGCCAAATGAAAATTTGAGGGTGGGAAGTCATGTTATTGTTTT  
TTTTCTCAAACCTATTGTCTTTAGCCTAGAGCAAAAGTAAATGTTAAGTA  
GTCCCTGCAGGGATATCTGACATGAAGTGTTCAATTAAGCTGAAGACATAG  
CCAGCAAGTATAAACAGGTTAGTGTGGCTCTCCATGATGCAGAAATTTCT  
TCACAGATATTCAAGCAATGCCTTTGATATACTAGTTCCTGGGCCATGGG  
GATAGAAGTGCTAGGTCATGGGAAATCTCTCCTCTTTGAAAAGATTACCA  
TGCAATGAGAGATATGTATTTGTTTTTTCAAGCTTTTATTTATTCATTCA  
TGACAGACACACAGAGAGAGGCAGAGACATAGGCAGAGGGAGAAGCAGGC  
CCCCTGTGGGGAGCCCGATGCGGGACTCGATGCCAGGACCCTGAAATGAT  
GACATGAGCCGAAGGCAGATGCTCAACCACTGAGCCAGACAGATGCCCCA  
AGATATATATTTGTTAATTTTATTCCAATGTATTTGATGCTATGATAAAT  
CGTGGACAGTATCCTATGGAAGCACAGAAATGATAGCTCCAGGATCAGAA  
AATATTTCTGACCTAACTGACCACTAAGTTCATTTCTAATGGAGAGGTT  
AAGAAAGGGGAGAGTTATTGATTTACTACATTATAGAAAATTTGAAGCAG  
AAGGCATATGTGGTATGCTATGAAATATGGGACAGAATGGGGCGCATATC  
TGGGCGATGTACTAGTGGCTTGGTGCTACTCAAAAAGAAGGTAAGTCAGA  
GAAGAACAGGGTAAGGTAGCAATGTGAGAAAAGGCTAGGACTCAGAGAAT  
CTCAGATTTTTTTCTGTTGGTAATAGGATGCCCTTGAGAGGTTTTTCATG  
CAGGAGAAAGGCATGGCCAGAGTTTTGTTTGAGAAGACCACTCTGGAAGC  
AATGTAGACGGTGGACTGGATTGAGGAAATTGGAACCAAGATTGAAGACA  
GCTATGATACTCAACATTACCGATGTTGGGACCTATTCCAGAACTTTGGA  
AGTGGGATGAAAATAAAGGCACACATTTGAGGAATATTTGAGTGGCAAGG  
TGCAGAAATCGTTTCAAGTGAAATCGAAAATCTACCAGATTTACCTGACA  
TTGAACATCTCAAATTTATTTGTTCCAGGCCAAAACCACTGCAGTCACCA  
TCGATGCTCTTAGGGCTTCCCAGCCAGATCTGTTGGGTTCACTCCTGCCC  
AACCATGCCCTGCTCACGCGTACGCGTGTGTGTGCACACGCACACTCTGGC  
TGCATGCTGTTTACAATGCTCTGCTTAAAGGGTGCAGAGCCGCACATAAT  
TCTATCACAAATGAAGTCGTGAAATTCATTTAGGGCCTAGGCATAGCTT  
CTCAATTTGGAAAGCTAAAAGCCAATGCTGGAGCAGGGACGGAGGAGGGA  
AAAGTCATAGGGGAGCTGACTTATCCTCTGTTCTTCATTTCACTTTGAAA  
GTAAATACAGTGGCCTTGGGCTCTAGGATACAAAGCAAATAATGGGCAAT  
TATTCAGTTAATATGATCACTGTAGACAGTGAAACCAGATAATGCCTGCT  
GCGCTCCTCCATGCACCCGCCCTCCCAGCGCACGTTGTTTTGTCTACAC  
AGACATTTCCAAATATAGCCCAGGTATGTTGTTTCAGGAGCAGAGCTGCT  
AGTCCAGTTTGAGGTCTGTCTTTGGGCCCCGATTTTGCAGAGTGCAGTGTC  
TCAGTAAATTACAAAATACGTGTCTTCTGTTACGTGGAGACGGTTGAGCA  
CCAGAGGGAGGCAGGGCTTCCCTTTCAACGGTGGTGATCCATATGTTTGGT  
TTTTTTAAGGGCTTCCATGAAAAACTGAAACGGGGAAATAAATACGTTCA  
GCCTTTAATTTTTAAGGTATATTGGGAACTTAGAGAGCAGTTCATTTGGT  
AAAAAATTTCTACTGTCTCCCTCTTTTTTTTTCTTTTCTTTTTTTTTTTA  
TACTCTACAGCTGAAGAATGCAGTTGATGTAAAACCGATTTTCCCTTGTT

TTGAAGGAAATTTCCAATGTCCAGAAGTTCCTTCTTTCTTATTGCAAGTG  
AGTTTGTTCCTTCAAATTTAGGCAGAAAGAAGAAATTCCTCTCTTCTTTCTT  
TAATTTAAGCAGACTGTTCCCTAAGTACATTTTTTTAAAAGGCTACAGAGGT  
AAAACCTAGGCTACGGTGGTGATATTAGCTCCAGGAAAAATAGTCTGATTT  
ACACTTGAATGCAGTTATTTCAACTTTTCAAGTAATGTAATCTTACAGAG  
ACCTTGGTTCCAAAAATATGACAATGTATTAAGTAGAAAATCAAACCTTCA  
CAGGATCATTTTTATTTCCATTAAATTCCTCTGAATATTGAAGAAGGCA  
ATATTTGGTTTTATTATTGTTAATTCCAAATATAATAAATATTTCGTCTCA  
ATCTGAGTTGATTTATTATCATTTAAAGCAGTAAAATATTTGAAGCTTTC  
ACTATATAGAAGATATCATAGGATTTGATCCAACTACTATTTTTTTTAAA  
TTTCTCTGTTGCTAAAAGTAGCATGGTCTAAATTCCTAGAAAGCATACAT  
TATAGACATAACTTTTTTTTCGAGGAAACAATAATAATTTTTCTTACAGTTA  
TTAAAGAATATATCATAGAAAATTATTGTTTTGTGGCAAAGGAAAATAATA  
CCTGTGTAGTTACTAGATAATATTGTCATTATGTGCTATACATGTGTACC  
ATTTTACATTTGTTACTACTACTGGGATTTTTCTTTTTCTTACTTATAATT  
TCTCCATGATTAGTTACTTTTTTAAAAATTTTTTATTTTATTTTATTTTAT  
TTATTTATGATAGGCACACAGTGAGAGAGAGAGAAGCAGAGACACAGGCA  
GAGGGAGAAGCAGGCTCCATGCACCGGGAGCCCCGACGTGGGATTTGATCC  
CGGGTCTCCAGGATCACGCCCTGGGCCAAAGGCAGGCGCCAAACCGCTGC  
GCCACCCAGGGATCCCGGTACTTTTTAAGCTTGATAAATCATCTTTCAAG  
TAATTACTGAAAAGTGCTATCAAAAAATAAATTTTAGGGACGGCTGAGTG  
ACTCCAGTGGTTGAACATCTGCCTTCAGCTCAGGTCTTGATATCAGGGTC  
CTGGGATCGAGTTCTGCATCAGGTTCCCTGGATGGAGCCTACTTCTCCCT  
CTGCCTGTGTCTCTGCCTCTCTCTGTGTCTCTCATGAATAAAAAATAAAA  
TATTTAAAAAATGAAAATAAGGGGATCCCTGGGTGGCTCAGCGGTATAGC  
ACCTGCCCTTGGCCCAGGGCATGATCCTGGAGACCTGGGCTCCCTGCATG  
GGGCTGCTTCTCCCTCTGCCGGTGTCTCTGCCTCTCTCTCTCTCTCTCT  
CTCTCTGGTCTCTCATGAATAAATAAATAAAATCTTAAACAAAATGAAAA  
TAAATAAACATTTAAAAAATATCTTTGAGCTAGTCTATACAGTCCAACAC  
CCTGTTACTCTCAAAATTATCTGTTAATTTCTCATAAAAAGGTAGTGGCT  
TAATATCTCTAATATACCTAGAAAGCAATAACAAAGTGTCTTAAGTGTTA  
TCAACAGGAAGCAGATTCTCTATGACAGGAGCATGAATGGTAGAGCCCAA  
AGGCTGGACTGACTGATTGCTTTTACGGTTTTACTTTCATTCCAGTTAT  
CATACAGTATAATACTAATTTCTTTTGTACAATATAGTGATTTGATACTT  
CTGCACAACACCCTGTGTTCAACACATAAATTGCACTCCTTAATCCCCATC  
ACCTAATTTGTTTTAAAGATTGTATTTATTAGAGAGAGAGAGGAGTGCAT  
GTACACGTCAGTGCAGGAGCAGGGGGAGGGGCAGAGGGAGAGGGAGAAGC  
AGACTCCCTGCTGAGTAGAGAACCCTGACGTGGGGCTCTATCCAGGACCCC  
AAGGTCAAGACCTGAGCTGAAAGGAGATGTTTAAACAGACTGAGTCACCCA  
GATGCCCCCTCCCTATCACCCATTTAATCCTTCTGCTATTTGTTCTATATT  
TGTTCTCTATAGTTAAGGATCTGTTTTATGATTTGTCTCTCTCTCTTTT  
TATCCCTTTGCTCACTAGTATTCTTAAATTCCACATGAGGGAATTCATAT  
TCTATTTGTGTTTCCCTGAAACATATCACCTGTGTTTCCCTTATTTCACT  
TAGCATCGTACCCTGTAGCCCCAGCCAGGTTGTTGCAAATGCCAAGATAT  
CGTACTTTCTTATGGCTGAATAACATCTCATTGGGTATATATATATATAT  
ATATACACACACACACATACACACATATATATATATATATACCATATCTA  
CCTTTTTCCCCCTTACATCTATAAATCTATGGTTAGGATTTAACTACTCC  
TACTTATTATCTCTTTGACTCTGTCCACCTATTTACCTGTCCAGGTCTT  
TTTCTCTGTACCAATTATCTTCACTCCTCTCATTTTTTTTTAAAGATTTG  
ATTTATTTATTTCATGAGAGACACAGACAGAGGCAGAGAGATAAGCAGAGG  
GAGAAGCAGGCTCCCCACTGAGCAGAGAGCCTGATGTGGGACTTGACCCC  
AGGATCCTGGGATCACAACTGAGCCAAAGGCAGAAGTCAATCTCTGAGC  
CACCCAGGTGTCCCAATTCTCTCATTTTTTTATCAAATGTAGAAAGGGC  
TCATAATGGAATGAGATGATAGAGCTGTAAGAATTATTCAAATTCATGAC  
ACTAAATTATTTGATTTGTGTCTCCATATAGTGTCAATAATGGCTGTCTAT  
TATTATTTTTGTATATTGGGCTGATTTAAGTCACTGTTGGTAAGATTTTT  
CAGGTGGATGAAGTTGGGAGTGGGAAAAAGGGAGCTGAGATAGTGGTGT  
TTATTGAACATAATTTAATGATTTATAATGTATTTATAATGAAAAGGTCAA

TATCAGGCTCAATTTAATTAGATTGTCTTATCCAGGTTGGTGTGGAATTG  
GGGGTGAGCAATAAACACTGAATCAAAAACCAACCAAGAAGGCAGTGGGG  
CTTCCTCATTACATAAGCTGAATAAGTGAAGCAAATGATTAAAGTCCCCT  
TGGAAGTTAAAAAATAATTTGAGGCCAAGGCCATCTTAGGGTTTAAA  
TACCCCATCTGTAATCCCTCGTATCAAATCAGTATTCATTGTGTATCAAA  
TTTTAAATATGTGCCTTAGTCCTCTCAACACTCTTATAAAGTTTTAGAAT  
TTACCTTCAAAAACCTATGTTTGCATTGCGATTGAGCATCATTTTCAGCACC  
TGCAGGGAAGGGGCAATGAACACAGAAAATAAGCTCACTGTTCTTGCTAA  
TGTAGACAAAAGGACTCTGTAGAAAGTGCTTCTTGGGGTGCCTAAGTGGC  
TTAGTTGGTTAAGCATCCTTCTTTGGCTGAGGTCATTATCCCAGGGTCTT  
GAGATCAAGCCCCACATCAGGCTCCCTGCTCAGCAGGGAATTTGCTTCTC  
ACTCTCCTTCTGCCCTCCCCCTCATGCTCTCTCTGTCTCATTTTTCTCTCT  
CTCAAATGAATAAATAAAATAGTTTGTTTTTTTTTTTTTTTAAAGAAAGCG  
CTTCTTAAGAATGTTAGTGTGTTAGCAGTAACTGCAATTCAAATAAGTGT  
GTTACAGGAGGGACTATGAATATCAATGCTCCTTACTATGGAAAAACAAA  
CAAAAAAGGACATCTCTGCCAACGCCATAGCCTTGAGGGTTACGAAACAT  
GCCATTTGATTGTCTTCAATCTTCTGTATGAATTGCCTACAAGATTCTTC  
ATCTTCCCTGGACATGATTAATGGGAGCATATATCAACTCCAGGGGCTTC  
CACCTTCTCTACTGAGCTTCCCTTAAGAGGATCATCTACCATGGGGAACA  
ATAAAAGATAGCTGGAACCTAAACCAAAAAAAGCATAAGGGTGGGGAGAA  
AATCAATCTATTTACCACTAAACCTCAAATAAATAGATGACCCTGCTAG  
CAGCGCCCTTGGAGCCCTAATGAGATACAAATTGATCGACAAATGTTCTC  
CCTATGGGAACTGTGACCTATTCAGCTCCAAAGAGCCAAAGACCGAGTT  
AAACCTCTTAAATATCACACCCCTTGGTGCTTTAACCATTTTCCTTTGTT  
GCTCTTTAATTTGAGACATTTGTCAAGGAAAGAAAATATATGCCTTCTGG  
GAATCCCTTGTGGAGTTACAAAGGATGCAAATCTGGCCTGAGATATGGT  
AAGCTTTCCAAGAACGTCAAAACTCACACTGTTGCTTTTCTCATTTATTG  
CCCAGTTTTTCAGCTGGAGCTGGAATATGCCCTTCAACTCCATCTAACAA  
TGCTTTTTCATAATGGATGCGTACCTAATATGAGAAGAGCATGCGCCATAG  
GTTTTAGACACCCATAGGATCACTGCTGAAACCAAAAGCCCCATTTTTAA  
TCCCCAGATTAAACAAGGACAACCAGGAGGTGGAGAAGAGAAACAAAAA  
GCTCATGGGTATGTCATCAGGAAGAAGGAAGCTGATGAACCTTGTGGTTT  
GTTTTGCTTACTTATCCAGGAGAATGAGACCTGTCACTGGGATTTCTGTAT  
TCAGCTTTATGTTGCTTGGAGCAAACCAATTTCTATCCCAGAATCTCAGT  
TGCTTCCCTCTGTCATGGGAAAAGATCAGAGTATACAACCCAAGGGTCTTT  
TTGGGGTCTGTGATTTTTATTTATTTTCCCTTAGGCAGATTTGGGCCCTAAA  
CAGTAGCAAACAAATTGCCAAAGATGAAAACCTGAGAAAAACATCATTTT  
CTTAATGACTTAAAAGACGGCAAAAATACCAGGTGATATAAGATGTCAAG  
AGCTCGTTACGCTTTTTGTAAATACATTTATATTACATTTTCATCATTCCAA  
TACTCTTGGCCCTAAAGAAATCTTGTGTCTGTATCAAATGGATCCTCTGGT  
CCAACTTCCCTATTTTCATGGAAGAGGAAGCTGCTGTCTAAATCTCAGAGT  
TCCCAAATTATAGGAGATAGTGAGAGATGGAGAATATTTGTGAAAAGGGG  
GGATATATTATTTCCAAGGCATGCATGTTAACACACATGCAGGTAACACA  
TACACACATACTTAATTCAAATAGTTTTTGAAAACGGTACTGAGTAAAAGT  
ATAAAATGAAAATACATTTTGTCCCTTTCCTTCGGGGGACTTTGATATGA  
GAGCTATGATATATATAAGTAAATTCAATACATGGAATTATGTCATTAGA  
ACAGATAGAATAGTGTAAAGAAGGAGGGAAGCCGTTTCCCACAGGGAGA  
GTCAAGGAAGGCTTTGTGGAGGATGTCATTTGAGATGGGCCATAAAACAT  
GGATACTGTTTTATATTTTAAAGACATTTCTGGGTGGAGGAAACAGAATCCA  
TCCATTTTACTCACTCATTTCATTTACTCATTACCCAACATCTATTA  
AGCAATGACAATGGAGGAGGCATTTGTGTTTGATCCCAGACTATGAAATTA  
AATAAAACGAGGTCTTTGCCCTCAGGGGGTAGCACTTATTTGAAAACAG  
CTAGGTGACCAGTTGATCTACATCATAAAATATGTGTAAGGGAATGGAGG  
ACATAAAATAGGGAAGGCAGATTGGAATCTAATTGTGGAAGACCTGAAT  
CTCAGCTTGATTTTTTTTTTTTTTTTAGATTTTATTTATTCATGAGAGACA  
CACAGAGAGAGGCAGAGACACAGGCAGAGGGAGAAGGAGGCTCCCTGTGG  
GAGGCCCCGATGTGGGATTGAGTCCCAGGACCCCAAGATCACGACCTGAGC  
TGAAAGCAGAAGCTCAACCACTGAGCCAGCCAGGTGCCGCTCAGCTTGAT

CTTTATTTGAAAGGCAATGAGAGGGTCACACAGGTTTCTAAGAAGATTGC  
AAGTACAACCTTGATCAGCATCATGCTTTAGATAAAGGTCACCAAGCAGCC  
ATAGGCAGCACAGGATAGATCTCAAAAAGTAAAAGTAACTAGATAGAACTCAAG  
ATGAAAAAAGGAAAGAAAATTTTAGCAAACCAACACAAGGTTACTAATGA  
TTTAGTACCTCTATTTGCAAAGCCTGACTCGGATAATCTCCTCGAGCTCC  
AGAACCAATATTTCTTCTGAAATGGCTCTCCTGAAGAGTCTTAACACTTT  
AAAAATACAAACATATGAAATCTCCGGAAGGAAGACCGGAAGGACTACAT  
GGGGGGGATGCGGGGTGGCAGGGGCACAAGGCCAGAAAGGTAGAGGGAC  
TTGTCCAAGGTCATAAAGTGACTCAGAGAAGAGTCAGGAAAAGGCTCCAT  
GAGTCATGGTTCCCAGCTTCTGCTCTGACCACCAGATGAAGCTCCTCCTT  
AGCAACGAGAGAGGACTCAGCCTTGATGCAGCCAACTGGCTCTGTCTCT  
ACTTCTTTGGCCTCCCCTAATGTCAGGACCATATCCTGTTACATTCTGTT  
CCACACCCCAGAATAAGTTCCAATGAACACATTTTGGCTAGGTGGAAAGT  
GGTAGCAATGAGGTAGTTACCTTGGAATATGACACCACCAGTGGCCAGT  
GCAGGTAGTAGGGCCAGAGTTGGAATGAAATGAGCAGATTCTAGGTCTG  
CAATGGGAACCATTCAGTTTACAAGGGTAAAGGTACTCAATGAATCTGGA  
CAATATGGGAAAAGAAGACCATGGGTCAAGGGAGATTTGGGAGCATCTGC  
TCTTCGCTAATAAAACAGTCGTGCTCTGGGATAATATCTCACAATAAGGA  
AATGAGTATATTAGGATCAAAAATGCCCTGAGGAGTTTGTGATATCATCA  
AAGATGCCCCGTTTTTTGTTAAAATAATACTTGCCGTCATCCTCCAATCCC  
TGAGATTCTAATTTACCCTTTTGCGGGCAAAGAGGATGGTTTTTACTGGG  
ATTGTTTTTAAACCTCAGTCAACTCCAATACTCATCCTGGATGGAAACCA  
CTCTTGCAAAATATCAGATTTGTGGTATGGGAGTAAATGTAAATTTTTCC  
TTTTTTTTTTTTTTTTGATTTGTACTTGCCATTATTCTTCCTTCTGGGCC  
TAGAATCTTCTTTTGCCGTTAATCATGTATGGCTCATTGAAATTATTGTT  
AAATTGCAATTTAATATAGCTTTTAATGCGCAATATTA AAAACATACGTT  
GGTCATTTATGGTGTAGAAATACAAGTATTCCTTGACAGATCTGTAGGC  
ATTCCTTGACAGTTCCAAGGTAAAGGTATATTTACAAGCGTCTGGGAGAAA  
TGAGTAATAATACCTTTTTCTTATGAACTATCAGTGTGGGAAAGCCAGT  
GTACTTAATAATTCTTTATAGTGGAGGGTGTATAAATACAGTGTGTGTAC  
TTGTATGGGCAAAATATGGCATTA AAAAATTTAAATTTCAATTTAAATAAA  
CTAGCTACATCCTTGAAAATCTGTCAAAACCATGGAAAGCTGAGCTTCG  
CCATTAAGGGATGCATGCATAGGTGATAAAAATCTGAATAAATGCAAAAT  
AACTTATCACCAAAGTCAGAAAAGTGTTACCTCTAGGGGTCGGGAGGAGG  
TTTTGTGAGAGAGGGCACATGGAGGGGGGTAGTTCTAAGGGCCAGCCATG  
TTCTATTTTTTGACCTAGGTGGTGGTTACCCAGATGTTTCCTTTATTATA  
TTGTTAACTGTCCAAATATGTTTTATACAGTTTTCTGCATATAAGTTAC  
AATTCACAATAAAAAAAGTTTTAAAAGTTGGATAGTGCTGGAAGACTC  
CGTAATAAAAAACAGCTGTTTCTTGTCTCTTTTTCTCATCTTTTAAT  
TCCTTTTCAACAGATGAAGCCACGCTAGCTGTTCTACTGGTATGGATCT  
ATGTGTTTCTAAAGAAAATGATTATATATCTATTTTTCAATTTAAAGTT  
TACAGGTCATGTATCTGCTTCTCTATAGGTGATGGAGAATTAAGTCCA  
GTGCTTATTCCTCAACACACACAGGCGTGGGTGGGCTCTTTTCCTTCCTC  
CATCCTGCTCCCAGAGTCTTTTGGTTAAATTAATATTCAGTGCACACCTT  
ATTATGACTGGGCATATTTTGTATAGCTTAGCCACCCAGTACTTTAAG  
ATTACATTTACACCCTTTTGTACATTTTTACGCTCTCCTGATGGTTAAAT  
TTACTTCTGTTTTGTTTGTCTTTCATTTTTGTTCTATGTAACCATCACTC  
TTTTGGCTTCAACTATTTCCAAAGTGAAACAGTAAATGTCCCCAATATT  
CTATTCCAACATTAGATATTCTATTGGTTTGTGACGTGTGCGTGTGCACA  
TGTTTGTGCTTTTGTGCTATCTCCTTTCTGTTGCCTAAAGCCACATAAG  
ACATTGTTTCAGGTCTGCTATCTTAGCTGTCTTCCTAAGACTTCTCTTAC  
CATCATCCTGGAAGTTGTCTTCACTTCTTCCCTATTTCAATAATCCTACA  
TATTCCTCTTTTTATGGATTACTGCCTTGGAGTGTGACGCCAGGAGCTTCC  
TGGA AAAAGATGTATGGCAGGTAATTTTTATGAGTGTGGCAAGTCTGAA  
AATACCCTGATTCTACTATTACACCTCCTGATGGTTTGATAGAATTATAA  
TTATAGTTTGGGATTTTTTTTTCCAAAATTTTGAAGACCTATTTCTGCTGT  
ATTCAAGCTCCCAGTAATCTCATTCATAGTTTTTCTTTGCATGTGCCTTA  
TATTTGTTTGGTTTTTTCTTCCTAGAAGCTTTTAAGATATTTTCTTTATTA

CTGGTGACCTAAACCTTTCTTACAAGGCACCTTGATGTGAATGGAATTTT  
TTTTTATTTGTAATATCAGACACAAGGTGATGTCTTTAAATCTAGAACT  
CATGGGTTGTTTGTTCGTTTTGTTTTAATCCCATGTAAAGCGC  
TTATATGCATTTTGTATGATTTGTCTCTAAATTCCTCTTCTCATGGT  
GGGTATCCCTGGTCATCTTTGGTTTTCTCTCATTTCCTTTTTTTAAAA  
TCTGTCTTCTAATTATTTGGTGGATTTCTATCATTCTGTCCAATTTTTC  
ATTTCTCCTTTGACAATCTCCCTCTTTCTTACATAGAGGTATACTATGC  
TCTTACAAAAGATTGATTTAGGGACCCACTCTTGGCTTAAGATACATGTG  
CAGATTTTCTTTAGGATAAAAAATAAAACCATTTAGCATGCATTCACAATT  
TGGCTCCTGCATCCCTTTGTAGTTCACTGTGTTATTGCTGCCCACAACCTA  
TCCATACACTCTTGAACAATTCCCAGTTCTTTGGGTGCTATGTTCTCTTT  
CATCTTACTTGTTACTCTTCTTTGCCTTGGGATGTTTATCTCTGTCTTT  
CTCTGGTCAACTCCTACTTAATAATTCCATTTAAAAGCATATTCTTCTTG  
AAACTGTTTCTTTTCTTTCTTTTTTGAAGCAGGATCATATTTGGACATT  
CTTAGAATATGCTAAATTACCTTGCTTCCAAATACTTTTGGTATAGGTGA  
TATTTTATTTAAATATTCATTTTAGGGCACCTGGATATCTCAGTGGTTG  
AGTGTCTGCCTTTAGCTCAGGTTGTGATCCCGGGATCACGGTCCTGGGAT  
CAAGTCCCATATTGGGTTCCATGCGAGGATCTTGCTTCTCCCTCTGCCTG  
TGTCTTTACCTCTCTTTGTGTGTCTCTTTTGAATAAAATAAAATCT  
TTTATAAAAAGTTTCATTTTACGTGATTATAAATGAAGTACATATTCATAC  
TATATCCTTAAAATATATTACATTTTAAAATTTTATTTATTTATTTAAAT  
TTCTTAAAGTTTAAATTCAATTAACATAATGATGCCTTACTGGTAGAGGT  
AGAGTTCAGTGATCCATCAGTCTTATATACACCCAGTGCTCATCACATCA  
CGTGCCCTCTGTCTATGCCCATCACCCAGTTGCCCATCCCCCACCCACC  
GCCCCCTCAGCGACCCTCATTTTGTTCCTATGATTAAGAGTCTCTAATG  
GTTTGTCTCCTTCTCTGATTTTCATTTTGTTTTATTTTTCTCTGTTCCT  
CTATGCTCCTCTGTTTTGTTCCTTAAATTCCACATATGAGTGAGGTCACA  
TGATAATTGTCTTCTCTGATTGACTTATTTTGGCTTAGCGTAATATCCTC  
TAGTTGAATGTGTTTTCTAACCCACTTCTTTTAGGCAATACACACTTTCC  
CACCTTGTTACAGTGACCCTGCTAATTAGCTCCAGAGTGCTGTATTCC  
TCACTTCATGTCAATTTATTACACAGTATCACAGTTGTTAATCATCTCCCC  
TGTGAGATCTATTGTGCATTGTACTTGGGTAGGAGCCATGTCAGTCTTGT  
GTGCCCATCACTTACCAAGTTTGGGGGTGATAGTCTGGACTCAGTATATG  
AGGATATGAGGATAGTACTTGTTGCATGTATTAAGTGCTTACAGTGTTCC  
CTATATTATTTTAACTGTCCCTCATGTATTTCATTCATATAACCATCACAA  
AGTCCTGGTGAGGTTGCTCCTACTATTATTCCTTTTTCAAAGACAGGATC  
ATTATAAAAAAATTAATAAATAAATAAATAAATAAATAAATAAATAAAT  
AAATAAAGATAGGATCACTGAGGTTAAGTGGAATTCTCAATTCACCTGTA  
AGTGACACTTACTGATCTAAACCTAGACCTTCTGGTTCAGACCCTCCAT  
TTGCAACCCCTCACAAATGAATACTTGAATGGGCCTAGGCAACAAAACACA  
AATTCGACTTTTCACAAAGGGAAAATAATTCTCAAATTAGTGCCATAGAA  
ATGGAATTGCATAGAAAAGAGAGCTGACTTTCGGATATCTTCATAAAATG  
TGTCTAAGATTCTTTTTTCACTCTAGATATGAAAGCCTTATGCAAATCTC  
GATATTTTTAATCTCTAGAAAAGAACTTCCCAAGATATTTCAAAGTTTA  
GCTAAATAAAACCTTTACATTAATAAAGATGAGAATATCAAACCTCGTTT  
TGTCTTTCTCAAAGAGGATATATATTTCAAATCTATTTAAAAGTTACTTT  
CATAAATAACTGCATTTTACATACCTTAAACTTGCTAGTGCAACATAAATGG  
AAGATTTAGGCCATTTGAGGAGCTACATGTGAAAAGTTTAAAACCTAAGC  
ATAAGATGTTAAGATGCAACATCTTAGAATAAGATGAAGAATCATATCAT  
ACCTCAAGACCAAGTTTTTGTCTTTTGAATAGTCCCTTTCTCT  
TCCATATCTGAATTAGCAAAAGGACACAAGGGCATAACAGTGAAATAGCT  
TAAGTTTTTTTTTTTTTCCCAAATCACAGCCTTACCAATATATGAAAG  
GATTCATTGAAGAAAACCTACAAATTCATTTTGAATAAGGCAAGCTTCAT  
GGCTGGGCAACTTGTTCTTTCCACAGGGTCTGCACTTAGAAGAGTCCCA  
TACTTGCTTAATGTTTTGGCTACGGCTGTTTAAAAATTATAGTCACTG  
TTAAACAAGAGGCTCACATTTTCAATTTGCACTGGGTCTGAAATTTAGT  
TGGCTCATGCTATCTTTTGGCCAGATGTCCCTTCACATCAGAGGAAGCTG  
TGGTTGAATATTCAAAGCAGAGACCTAGGAGCTGGGATCACCAACTCCAA

TAAAAAAAAAAAAATCCATGACCTTTGATGAATTATTCAGCCTCTGCCCC  
ATTTGGACTTCATGGTGGCTCTACTACCTGCTTCTTCCCATTTAATTCAT  
AGCCGCATCATCAATTTCCAGCTGAAATATTTTCAGTGGTCTGTTCATTTA  
TTTTGTTGTCTTTTCATTTTCCCTGATTCAATTTGTTCTTCACTCTGCTAC  
CATTTATATACAAAATGAGTTCCCTTCTCCAAAATAAATGCTCATGTTTC  
TGTATCTGTCTGTGCTTATTCCATTCTTTAGTGAAGAATGTTCTTTTCTG  
ATGCATCTGCAGATTGTAGTTCTTGCTCATTAAATCTGATAGGAGTCTTA  
GTTACAAGACAGCAGAACATTGACCCGGACTAATTCAAGAGGAAAGAAGG  
AAATTATTATTTTTTAATTATAAAAAGTTTATAGATTTATAGATATGGCT  
GAGTTCAGGACACAGAAGGTTACTAGCACCCAGAATCTCAGCACTGAATG  
GTATCCTTTCCATCGTGTTATCTTCAATCTCAAGCTACACTTGTGACTCC  
AGCAGCCCCATGCTCACATCACTACAAAACAGATCCAACCTGGCCATAGG  
TCCACAAATCCATAGATTTAATAGTGATAACAGGGACACATGGGTGGTAC  
AGTCAGTGAAGTGTCTGATTCTTGGTTTGGGCTCAGGTCGTGATCTCGGG  
GTCATGAGATTGAGCCCCACATTGGGCTCTACACTCACCATGGAGTCTAC  
TTGAGATTCTCTCTCCCCCTTGCCCCCTCTGCTTGTGCTCTCTTTTTCTCT  
TTCTAAAATAAATAAATCTTTTTAAAAAGATGGTGATGATCAATGTTTTAG  
GTTTTATAATATTTATTGATCTGAGACTGATATAATGGGGTTTTCTGATT  
AATTTGGCCTATAATGACCTGAGACTGATAGAATAATGGGGTTTTCTGAT  
TAATTTGGCCTATAATCATGAATACTGGGTGGAGTTTCTTCCATTTGAAT  
CATATAGATAAAAAACAAAGGGGATATGTCCCCACTTCACTCTGGCATCA  
GAAGAAAAGGGAGTTGATATTGAGATGATCCTCAGGTTCATAACCACTTG  
TGTTGGTACAGCATTGAAACACTCACCTATTTGTTGATAATGAGCCTTTT  
TCAAGTGGCCTGAAATCTTATGTCTGTTCTAGACAGATTGGCCACACTCA  
GTATCACTCTGATGTCTCTGAGATCTACAAGCTAAAGGGTTAAGGACTGG  
CCACAGCAGAGGGCTTCTAGAATTCTTCTTAGACTCCAAGATCAGCTCTC  
ATGTGGCTGGCTTCACAACTCTGCCTTATTGGTTGTTTTATATATTTATT  
TGTCTGGGGAAAAAAGTTTCATCTTTAGGATAACGAGAACTTTTAATGGT  
AGTGTTTTAGGATTTAAATTTGATAGCAAATGTTAGACAACCAAATCATG  
AGTGGCTTAAACAACAAGGAGGCTTAATTTTGGTCACATAAAAACAGGTG  
GACAGCCCCGTGCTGGTTTGGCAGCTTCTTAGTAACCTGGGAAACTCTAGG  
TTTTTCTTTTGTGTTGTTCTGCCATTTTTCATAACTGACTACAGCTTGTG  
ATATGAAATGTTTCTCAAGCCCAGTCATCATTTTGCCTTTCATACAGCAT  
GAGATGGCTGAAGGGCATACTCCCATTCTTTAATGACATTTCCCTAGACCT  
CCATATGTCTCCTAGAAAGTTACATACACAATTCCCTTATATTTTATTGGT  
CAGAACTTAATCTGCGCATGTAGTTCTAAGAAACAAAGTCCATGCGATTA  
TTCTAGAACCATGTGTCTAACAAAATAGTAAGATCTTATTGTTATAGAAA  
AAAACCCAGGTATAAGTAGACAATTGCTTCATAGTCTTCAACTCATCATG  
GGAAAAAGATCTTAGGAACATCATCTTCAAGAAATGTTTGATGGGCTAT  
TGGAACCTTAGCAGAAAGGGGGAAAGAAGAAAGCAAGAAAGCAAAAAAAC  
AAGCAAGCAAGAAAGAAAGCGAGAGATCAAGAGCTACTGAGATAGAGCAA  
GAGAGCCAGCAGGAAAAAGAAGAAAAAAAAAAAAACCTTATTTTATATC  
TCAAACTGGTAATGAGGGACCATGTAGAAACCATGACTTTTATTCTGAAG  
AGAGAGGGTCTCTCTTCTAAACTCTATTTTCCATACCTCCATCCAATATA  
GGTGTTTTTCTTTCTGCTTGATCTCAACCACATATGGCACATGAAATACA  
AGCAGGAATTGTGTATGTTCAAACTCTAACTCCTCTGGCTAATACTTGT  
CTCTCTCTTCTCTAAACTCTTAAACACTTAGAGCTTATATGAAGCAATT  
AATTTACTGAACAAATATATATTGAGCATATGCTATAGGTAGAATGTTCA  
TTTAGGAGCTAGGGAAACATTAGTGACCAAAAAAGTTACATTTTTTTCAAG  
CATAGAAAAACTAAAAAATGAATAAGTAAATGATGGTTTGTGCTATACAT  
TGGCAAAATAGAGGGAGGTATGGGAGACTGGGAGGACTGCGAGTTCTGGG  
AGTGGGGACTTGCAATTTTTTAAGTAAGGTACCCCACTGAGAAGGTGGTAT  
TTAAACAAATAAAGAAGGCAAGAGAATGAAGTACTAAGAAATCTGGGAGA  
AGAATCTTTTAGGCCTGGGAAGAAGAAGCTCAAATGTCTCGATGTGGAAG  
CATGCCCATCCCGTGAATAAATATCTATTAACTGGCCCTGCCAGAGTGTG  
TGCAAGTGGGAGATGAGGTCAGAGACTAACTACATCACAGAGTGCCTACT  
AGGCCATTTAAGACTTTGTATTTTACTCTGAATGAAATGTGAAGTCATTT  
AAAGATTTTTGAACAGAGAAGGAGCATGATCTGTACTAGGTTTTAGAAAC

ATCATGCAGTTAGCAGGATTAAGATCAGACTTTGGAGAAATATGAGTAGA  
GGTAAGAAGAGCAACTTGAATGTACTGCAATAATTTAAGACAATACTAT  
ATAGACATTATATATAGAGAGAAGATAATGCCAACAGTATAAACTGACAG  
GTTGGACATGGGGCGTGAAAGAAAAGGAGGAATCTAGAATGACATTAAGA  
CATTTGAAGAATGGAGTTATGATTTGGCCAAGATGGTAAGGCGTAAGAAG  
CTTTTGGGCAAATTCAGTAGTTCAGTCTGTTAGACATCCAAATGGAGGT  
GTTGAGTAGTTGTCTGGCTAAGTGGAACAGCCTGAGCTAGAAATGTAAAT  
GTGGGGATCCTTAGCATATGGGTGGTATCTCTACCATGCTACTGTCTGAA  
ATCACCAAGACACTGAGTGGGGGGTAGGAAAAAAAAATAAGAAAACCCAT  
GGTTTGGGCATGAGGGGTGGATGGCATATTCAGTGTTCAGGTTGACAG  
GAATAAATGAAGTACCAAAGGAGAGTGATAATGAGCAGCTAATGAAGAAA  
GCTAAAAAAAAAAAAAAAAAATGTAGTGTGATACTATGGAATCCAAGCA  
ATGAAAGTGTTCAGGATGAGTGACGACCAACTGTGCTAAACACATGCT  
GACAGATCATAAGAGTTGAGGACTAATCATTGATCATGGATGTTAACTAC  
ATTGAGAGTCTCTGAGGATCTAAACAAGAAAAGTTTTAGTGGAAGAGTAG  
GGGCAAAGCCTGGTTGGAGTGGGTTTAAATAATATGGAAAGATACAAA  
TTGAATACAAGGAATCGTTTTCTGAAATTTTGTCTATCTGGGGGAACAGTT  
TGCTTTCCTTCCCAAGACACAATAAATAACAGCGTGTTCGAATCACGATG  
ACAACACTATTGAAAGAGACAATTTGCTAATATAAGAATAAGAGGAAATA  
AGTGCTGGAGCAGTAATCCTGATGGACCAGCTGGATCAGAGCATAAATAG  
TTGGCCCACAGTCACAAGATGGCAGAGGATTTGGGTGAGGAACTGGGAGG  
TCAGTGGCCTGGTGAAGATTTTGTAGGTGTTCTTATGTCTTACCTTTAA  
CTAGTTTCTCACTAAGTCACTGATATTATGTTTATCTGTTAAGATTATTT  
TTCCAGGCCAAAACCTGTCTTATGTATTTTTTTCAACACCTGTCTAGCCA  
AGATATGAGTAATTGTTTATTTAACTTTGATAAATAACATGGCAAATAGG  
CACTCCACTATTATCAGTGAATAATTATCTCTAAAACACTTGAGACCAGA  
ACGGCTCCTGTGATAAAATCTTAAGTGTGATATTTACTGACAAAAGATAT  
CATCGATGAAGTAGATTTTACCCATAGGTTATTAAGAATTGATAAAAAC  
CAGTTTTAGTTTTTGAAGTCTACTCTTCTTGGTTTAAATGTGGGTTTTTC  
TTTCATTTTACTGTGAAATGTACTTCACATGGAAACATGAATAAAATAGA  
TGTATCATAATGTGAACCACATATGATTAAGTAAATATAACATTGCCTTC  
CCTCAAATAAAGAAATGACATCATCATCCCTTGGGAGACTCAGGTTCCC  
TTCTAGGACCATCTTGCCCGTCGAGGTAAC TGCCATCCAGACTTATATTA  
AAATCATTTCCATTTTCTTCATGGTTCATCACCTACGTGTGTCCCTTTAA  
GTGATAGTGTTTATTTTTATCTGTCTTTGAGCTTATATGAATGGAGTCCT  
ATCCCTTTGTGTGTGATTTGTTCTGGGGGTGAGCGAGTGTGCATGTGTGT  
TAAAAAATGTTAATATTTGGAGAATTTGACTGAAGGCTATTTGGGAAAGT  
TCTGATATTTCAACATTTCTGAAAGTCTGGAATTAAAAAATAAAAAATA  
CAAAGCATCTTTAAGTGTGCATTTTCTATCCTGTTGCAGTGCCACCTCTG  
CCATCCATTAAGTGTATATATATGTATATATGGTCTATTGTTGAGCTGCC  
AAATACTTTTGCATTGATCTATATGTTTATCTCTGTGTAAATTCACCTT  
ATTTTAATTACTATAGCTTTAAATGAGGTTTGATATTAGGAAGGGAAAG  
TTCTCCACATGTCCTTCATTAAGAGTTCCTAATTATTTATGATCTGTTG  
CAATTTCATGTAAATTGCAAAATGTGCTCGTCAAGGTCTACCACAGGAAA  
AAAAATGGCATTTTTTATTGGGATTGCATAAATCTGAAGATCAATTTCGAA  
GACCTGAACTATTTCCAATATTAAGGCAATTACCAAAGAGATAAGCAAAA  
ACCCCTCACTTTAATTATGAATTTGCTCATTTTTTCTTTTAGCTAGTTTTTA  
TTCTGTATTTCATGATGTTTTGTAGCATAAAGCCATGTCATTTAGTCCACA  
TACATCTGGAGTTGCGACATTTTCTAATGAATTAAATCTTTAATCACTA  
TGAAGTGACTCTTTAACTCAAAAAGTATCACTAGTATAAAATCCATTTCA  
TTAATATCTGCTTTTCAGCAAGAGATTTGGTCTCAACGACTTAGCCTATTA  
GTAGAAAACAGAAATCTACATTTAAATCTTAATCCATCTGCCAGGACTTGT  
TATATATGGTGTAAACAGAGAGATAGTTTCATTATTTTCTAAGGGCAGA  
CCAGTGGCTCAGTGCTTTTTTCAGTGCTAATTGCTCTTTTCTAAGTAATTG  
GTCAGGTCATCTTGTGATATATCAAGAGTCCATATACCAGTGGGTTTATT  
TCTGTACTCTACTTGCTCTGCTGCTGAAACACTTGTGAGCACATAGCAGC  
ACTGACAAGATATTAAGGAGTGACCGTGCCAAAATTTATGGGAAAGCTGG  
AACCGAGATAGCTACAAAGAAAAGTACCGTGATACGGTGCTGATGGGATT

TACCTACACTGGCAAACCTGGTCTGGTAACTTTGGCAACCACAAGGGGGC  
AGGGAAGGGTGTTCACTGGGTGCGAAGTCCAGTCCCAAAGTCTTTCCAAG  
GTAGAAAGTCAGGTGGAACCTCCCACATCAATATAGGACTACCAAGATTC  
TAAGGTGGTTATTGGTAAGAAATAGAGAGAAGGGGTAGAAACAGATACAT  
AATTACAGCTCATTTGCATGTTGTTAGACATCATCATGTAGAGTCAAGAT  
GTATTTTGTATTATTTATAAGGACTTTTTTTTTTTTAAAGATTTTAAATTTAT  
TTATTTCCCTGAGAGACACACAGCTAAAAAGGCAGAGACACAGGCAGAGGG  
AGAAGCAGCTTCCTGCAAGAAGCCGGAAGTGGGACTTGATCCTGTACCCT  
GGGATCATGATCTGAGCCAAAGGCAGACACTCAACCACTGAGCCACCCAA  
GTGCCCTTTATAAAAACTATTATACTCTCTTTAGCTCCAAGCAATTGTCC  
ACATACATAATCTCATCTCTTCTTTTTTTTTTTCTTTCCAGCGACAC  
TATTTCTCTCCATTCTGCAGTTAAGTGTAAGAGATTCACCTGAGGGTAAG  
AAATAGGTTTTCAATATTTCTAGTTGTAAATATTTTAGAATTTTTTCATCC  
TGGTATATCTTAGATATGAATGTTTATTAGCTCTCTCATCTTTTTGTAC  
CCCAACTCCAATAGAATCTCCAGTTGAGAAAGCTTTGTTTTAGTCAAATC  
AAATTAATATTATGAGCTCTAAAAAGCTACAACGAATGCCAATTATAA  
CAATATATTATTTTTACTTCTTAGCTAAGGGGAAAGAGTTAGTGACAGAA  
CCTTGGAATAAAATTATTTCTGTACATTGAAAGCAAATGAGTGAACTG  
AATATGCTTATTTTCATCCATAAAATTAGCCATGTAGCTTCTGAATGCTTG  
AGCCATGGAATGAAACACTCAATTTCTTAAAAAGAGGCTAAAATATTATA  
CCTACTATATCAACCCCAAATCAAAATTCTGATAAATCATTATTGTCTTC  
ATGCATAGATTCCCAAAGTTGTTCTCTCTGCTGGGATTCTACAGAAAACA  
CCTAAAAAGTCATGGATATTTTAGCTTGCATATGAAATTAAATATATTAT  
TGCTCTTCCACCCACATATTCATTGAATATTGTTTTACAGCTAAATTTTT  
AAGAAGAGAATATTAAAGTTAATGATTAAATCAAGTCCTCGATCGAGCTA  
CCATCCCAATAAAATGGATTTTCTTTCACCACATGTGTGTCAGAGTTATT  
TGCCTAATCATATTTATTTTCTTGGTCTTCTCCCCCTGTTTTTTTTTTTT  
TAATCAGACACTGATATCATTTTAAAGTTTTGTTTTGTTTTGTTTTTACAT  
CTTGCTTATTTTCTTAGGATATTCAGCTAGTGGTGGAGAAGAAAGAAAA  
TAATGGGTGAAAGAGCTAAATGCTAGGCTGCCTTTCAAATCATACTTTCA  
AACATCCTGCAAATCCACATTTCCCTGCTCATCCTTTTTTTCTTGATCAA  
TATTTCTTCGTTTTTTATGACTCTCCATATGAACAGTATCTGCATGAAT  
GTTTCTGTTTGCAGAACTCACATAGATTTTGTTATATAAAATTACACATT  
GTGCATACAAGTGGATATCTTGTTTTGTTCAAATATGCTTACATAAAGG  
TTTTCATGTAACAAAACAAAAAAGGAAATCGATTCTGAATTTGGCTCA  
TTGCCTAATTTATTACTACTTTATTTTATTTGACACTCAGACACAAGTTT  
GTTTTCATGGCTCAGATAAAGAACTGGACACCCAGTCCCTTCTGTGGG  
AATTTGGTCTCATTTATGTGACACCACCCAGATTACCTCCACCCCTTCCT  
TACCACGCCCCATACTCACCTAAAGTGAGTTAAAAATATTTATTGGGT  
GTGAGAGTAAGGATTCTTTTTTCTAAATTTTCATATAAAATAATGGTGCA  
GTATTGGTCATGACCAACAGAGTCTAAGGCTCCTTTGTAACCACTAAATG  
TAGGAAAACCCACAAATTACTGTTGGAGAGGGGTGGCCTTGAGTTCTGG  
CTTCAATGACCCTCTCCCTCTAAATTCAAATACCCTGCATCTGTGTAAAT  
AAACATCTCTAGGTGTATGGTAAGGGAATATTTAGCACGAATATGTTTCA  
TACAAAATTAGCAGCAAAGAAAAACTTTAGGCTTGTAATTACATAAAAAA  
ATTTAAGCCGTTAGCATAATTAAGATGTTTCTTCCCTTTTCCCTTAAACA  
GGTAGGATATGATCCATCATCTTTTGGCGTGGATACTCTCATTGATTGAA  
TTTCCAAAGTACTATTTTTTTTTTCTTCTTCCCTCCATGAAAGATGTATAATGA  
TACTTGATTCTGGCAAGAAGCTAAAGTCTAACATTAAATGTTTATTGGT  
TATAAACACTAAATTTAGCATTGAGTGTCTGCCAATGGGATCTAGGGGGA  
GGAAGCCAATGGATAAGCTTCTTACTTGGGAGATACTAGCTAAAAGTCTC  
ATGTTAGCTATAAGTAGAAAGGAAGTGAATTCAGACAAGATAAAGCCTG  
AGTCATTTGGCTCTAGAGAGCATGTCTTAGTTTTCACACTCATTTTCCCA  
TTTTTGTTTGTTCCTTTTCTGTTCCTAGTTTCTGATATCAAACTTCCTT  
TTGAAAGCAATGCTGAAAAGTCTAGCTTAGAGCTCTGTAGGGAGGTAGT  
AACTCATGAAAGTATATATTCAGGGAGGTGCTCATGGATGTAGTCTAGTC  
TGTCATCTTGCTTTTGAATTCTTGGAATCATTGTATCTTAACACATTTT  
ATGTTTTGGAAGTGATGAAAAAGTGACCTCGACTCAACTGGATCTTGGA

CATTATCTCCAGATAAGTCAGACACCCACTGCCTACAGGTTTATCTCATT  
CTTAATAGAAGGAATGGAAGTACATATTATCAGTTCATGTCATTAGAAGA  
CTTCTGAGTAATAGTATCGGAGAGAGTATAAGTTTCCAAGGTGATAGAGA  
AAACTTCTAAACTGCATATATATCTTTTCAGACTCATCTTGGACCACCAGT  
ATGGTCAAAAGCCTTTTATGATTTCTTATCTCCAACGGAATCACAATAGA  
GGCCAGCCGCACAATGCTATAGAGGTCATCTGCCGTAGCCTTCTCATTTA  
TAAGCGTGACAACGGAGTCACTTAGGTAAAGGTTGTGGGAGGATCAGAGT  
TGGCAGTAGATCAGAACTAAAACCCAATTCTTTTGACTCATCGGCCAGTG  
TTCCTTCACATTCATTAATTCTGTTTACAGATAGTCTCTCATGTTGTTTT  
TCATATCCCTCTACTTGTGTCCAAGACCCATCAAAACCTTGCCCCATCTA  
ACCAATTAATTTTCATTTTCTGTTAGTCTCACAACATGAACATTTTCATCAC  
CATCAAGCTGAACTCCTAGCTTCTATTTATCCCTTGCTAGAGGGACCAAA  
TATCTCATTTTTGGCCAGGACTGCTCTGGTTTTAGCACTGAAAAATCCGGT  
GGACCTTTTTCAATTCCAAGCAAACCTGGCTTAGTTGATCACTCCACCACAT  
ACACTTCTTGGGTACCATTGCTTTAATCTTCTTTTTTTTTTTTCCCTAAGA  
TTTTATTTATTTATTCATAAGAGACACAGAAAGAGAGAGAGAGAGAGA  
GAGAGAGAGACAGAGACACAGGCAGAGAGAGAAGCAGGCTCCATTCAGGG  
AGACTGACGTGGGACTCGATCCCGGGTCTCCAGGATCACACCCTGGGCCA  
AAGGCAGTGCTAAATCGCTGAGCCACCCGGGCTGCCCCACTTTAATCTTCC  
TGTCTGCAATTTTCTTCCCCCATTTCCAGATTTTCTGGATGATTGAAGAA  
AGCTCAAAACCCATTTTCATTCAGGCAGCCTTCAATTCTCATCCTTACCTT  
TCTATGGTTCTTAAATTGTGCTTTACACAAGTAAACTTTTAATTAAAGGC  
TAGCTTGCCTTGCTTGAAGATTATTCAAGACACATCATCTCTCCTAGAGT  
CAAAAAGTAGACTATAACTTATTATGGAATAGATCAAAAGAGATAAAATGA  
AGTTTGCTTCAGGGAAGTGCTGCTGTAAGGTAGGCACTGCCATAGGTACT  
TGGTCTCATTTATAGCATCAGACACTGTAAGGTTGGTATTACTAAATCTA  
TTTTACATTAATCCATTAAGTTGAACAGAGTATTTGACCAAATTCAAAC  
CCAGGCCTATCTGGCTCCTTCCACTACACCACACTTGCTGCGTAGCAAAC  
ACGTTGAATGTTTTTGAATGTCTCACAGCTATTAACAAAGCACAGAGCCT  
AAAGTACATTCTCAAGAAATCCTTGCTATTTTGTCTGATTGCTTTTCTA  
TTTAAATCTACAAAGTCACGCTAATAGTGGCAGAGGAAGTAGGTTTACTA  
ATTTATTTTTTGAATAGTAAGTCAGAGAAAATGTGCCTTTCACCCACTT  
GAAGCAGAGTTGTATTTTCATAGGCTGGTTAATAATCATCAATGAGTTCAT  
TCTCTGTGTCTTATTCCTGGAGACTTAAGAATAAGGCCAAAATGATCAAT  
GTCTTCTCTCTCTATCTATAATGTCTTGTCTATAATTTTGACTTTCTCTGC  
CTTTCTTACTTTTTTTCCTTTAAAAAAAAGCTTTAGATCTACACTGCTCA  
GTAGAGTAGCCACTACCCCCAGCATGGCTCGTAAAAGTGAGACATTCTGT  
ATGCATGGAATACACCCCAGATTTCAAAGATAGAATAAAAAATAAGAATG  
TAATATAGTCTGTAGTGATTTTTTAAATATTGATTACATGTTTAAATGA  
TGACATTTAGAACATATCGGGTTAAAGAAAACATTAAGATTTGATCTTGC  
CTGTTCCTTTTACCTTTAAAAATTTTGGCTATCAGAAATTTTCAATTAG  
CAATAATCGCGCCTTGGATAAACCTCATTGGCTATGATACTGTCACTGCG  
CAAAGCTTGGCTATCAGAAATTTTAAACATTACACATGCGGCTTGCATTTT  
GGATCTGTTGGGTATCATTACTATAGATGATTTCTGGAGACATAGGGTGA  
TGAATATTTTTTATTCATTTTCCTTTGAGAAAATACCATGCTTTAATACA  
GTCGTTTAGAATTTTTTCCCGATAAAATTATATATTTAAATATTATGTTAG  
GCTTTCAAATTAATAAATGTTAACGTACATCCCTAGATATGATGAGACAA  
TGATTTTTTTTTCCCGATAAGTAAATAACAGTAAAAGGGAAGTTACGTAAG  
TCACATGTATATAAGTGTGACAGTGAAATTTTCAAGTATTGTTTTTGAAGCA  
TGCAATCATGATATTTCAAAGATACACACTTAATAAGCCTCTTCTTACTTTG  
GATTTCTGTATGTTTGTGATGGAACCTTAATTTTAAATCAAACCTGATAGTTG  
AGAAAAATAAACAAAAAAATTCATAGTCACTCGGAAAAACACAAGATACT  
TTTTTTGGGAGGGCGCATAGTACACAGTGCAACTATTTTTTAAATCTTT  
TCAGAGATGCCTGGGTGGCTCAGTGGTTGAACATCTGCCTTTGGCTCAGG  
GTGTGATCCCGGGTCTGGGATCGAGTCCTGCATCAGGCTCCCTGCATG  
GAGCCTGCTTCTCCCTTTGCCGTGTGTCTCTGCCTCTCTCTCTCTGTG  
TCTCTCATGAATGAATAAATTAATCTAAAAAAGCTACCTT  
TACAGAGCTGGAATCTGTGATACTCAGATCTGACAAAGCTCTGAATCCTG

TACAGCATTCTTATCAAAGGATGGCAGTAAATTGCTTCATTAAAGCTC  
TTACAGGAAGCAAAATGCTCCACCCTCTTGCAGCTGGTGTGATTTAGGAA  
TTCCCTAGTAAATGTACTAATTATTTCTAAATGATGGAGCTTTCCCCAGTT  
CCATTTCCAAATCCTAGCCAACAGATTGACAGAAGACCATAGGAGAGAGG  
TCTGTGGGTATAGGTTCAGGGCATGTGTGCACACACAAAAAGGAACAGGA  
TCCCCTTTGGTCACTGAGTAAGTGCCTATGGTAGCCTGGGACTTCCTGGT  
CCAGGGAACCTCGGCAGAGTAGCTCTTTTAATAACTGAGGGGGCCTGGAAT  
TCAATAATGCAAACAACAGCCTATTTTACGAAGTTTCTCCATTTTTATGA  
TTTCTATCTCTTGGTCAGAAGCCTCCAAGGAAAGTAAGGTTCCCTTGATTT  
TACAAACAAAAGACAAAAACGCTGAATGTTCCAGGTGTAGACTGGAGTC  
ACCAAGGAAATGATGACTACTGGAATCATAAAATAATTCTTAGACATGTC  
TAAATATTCCCTCATCAGCGGAGAGCCGGAGCAGGTGTGCAGGGAGGCGCA  
CAGGTAGAAGAGAAGGTGGCCCAGCAGCCTTATCAGCAGGGTGGCATTG  
GCATTTTCTGCAGGACCGTGGTTCATGTCACTCGGGCTCTTTGATCTCAGA  
ACAGCAGAGAAGCATTCATATTTGCTTTTTCTCTTGCTCAGCACCTAAAAA  
TGCTCTCAGTACACTCATCAAATCATTGGTGATGATAACTTCCTGAGGA  
TCAAAACAGGCGAAGAGTATTTTCGACAAATAAAAGTAATATTAACAAGACA  
TCATGTTTATCCCTTTTCAGGAAGTGGCTGATAGAGCGATGGAGATTTACC  
ATGGGAATGAATAAAGCAGAATTTCTGATGAAAGTGTTGAGGGGCATTTG  
GCATCCACCAGTATCCATCAGGCAGTGAGCCTCTTGTGCAGGGGTGATGG  
TAAGCACAGACGTTTCCCAGCACCTTACTGTGTGACGGTCATGCCGCTTG  
GCCCTTTACCTGCACTCTTTTATTCAATTCTCATGATACACCTGGGATAA  
GGGGCAACGATCATCTCTATTTTAGAGATGAGAGAACTGGATCAGAATTC  
AAGGAACTGGCCCGAGGTCAACAGGTAGTAAGGTGAGAAGGTGTGTGAGC  
CAGCAAGAAGCGGTGCCACCTTGGCCATGCATCAGAACCATGGGGGCAGC  
TTATAGTAAATCACAGATGTGCAGGCCCCATCAGAGATCCTGACAGAGTG  
TCTGAGGTTGGGTCTGGTTATCTGATGAGTGGACAAGGTCCCTCAAGGAAT  
CTGATGTAAATGAGAACGTCAGAACAAACCGATCTAACATCACAGCCCTCG  
GAGGCCAACTTCCCTGCCACTGACATTCTGCAGGAGACTGACGGCTCTTG  
AATCTGATTTAGTCTCTTAAAGCTCCAGTGATTAATGTGGAAGCCTCCC  
CTTTTGGCAACGTGTTTCAGCTTATATGCTTCTTCCCTGTTGGCAGAACTC  
AGGGTCTGCCCTGTTTACTAGCCTCCCTGTGTGGAGAGATTAGTGATTTT  
TTGGTCTTGGCTTCTGCTGATAGGATTCATGCCAGAGAATGAGTGTGGAC  
CTTCGTTTTCAAAGTAGAGGCTCTGGCTGCTTTATACAAATGATACTCTA  
GCTCAGTCCCCCAAATCCACAGAAAGCCTTTTCAACAATGTGTATACACG  
TAGTTCAGCCCCCACTTCCCTCTTAGTCTGAAGAATGGATAAAATTCC  
TAAACCACCTAGTAGGGTAGGGAAGATTAGACATGGGGGGGGGTACAGTA  
GAGAATGAGGGAATAAAGTTGGTCACTCTGGCCTCTTCCAGCTTCCTTT  
GCTCTCTGTTCTTTGAGATTTAGAAGTGTAGTGGGTTTAGATTAATATAT  
TCTTGGCGTTGTTTCTGTTCAAAGAAAAGGGAGGGGTGTCAGCGGTGT  
CTGATATCAAATAATTTAACCAGAAGGGTAGGTAAGTGAAAGCAAAGAAA  
GGTCTAGGCTCATTTTTCAACAGGTTAAATTAAGGAGGAGGAGGAGGAGG  
CTTCAGATATCATTCATTTTGATCCAAGGCATGTTGACCAAACACCAACT  
AAGTACTTTGAAATGTTCTCACTATATTGTGAGCTGGAATAAACGGTAT  
TGAATGAATTTATTACTGAAGGCATTGTGTTGTATACAAACAGAATGAAA  
GCTGGTGCCTGACTTTAAGAGAAGAGGCATTTTTTTTTTGAAGATTTTATT  
TATTTTATTTGAGAGAGAGAGTGCACGAGCCGGGAGGAAGGACAGAGGGA  
GAAGCAGATGTCCCGCTGAGCAGGGAGCTTCATGTGGGGCTGGATCCCAG  
GACCTTAAATGATGACCTGAACCTGAAGGCAGACGCTTAACCGACTGAGC  
CACCAGGTGCCCTAAGAGAAGAGTTTCAATCAGTTATGGGAGGAATGC  
AAAGTTTTTGTGCAACTAGCTGCAGCTTAAGGTAGAATACGACAGAAGGT  
TGTTGTGAAGTCACAATAGGCAGAGAAATTAGTATTGATCAGGGAGAGTA  
GATGACACAGGAGCTAGTTTTCTATGTCCAAACTGGCTCTCACAGAAGCT  
TCACGGACATATTCTCCTGGAGTCGCTCATGGCCATGCCAACAGAGGAGA  
GAAGGGGAGGGTGGGAGGAGGAGGGTAGGGAGACAGGCTTTCAGGAAAC  
TTTTAAAGTCTGTTCATGGAGAGGATCCGGTTGTGACTTTCTAGGATGTGT  
GGGGCGGGGAGGGGGGGGGAGTAAAAAGAACCCGAGCAAAGGCACAGAAG  
ATGTGTTCTGATTTAAACTAGATGACAGTTTTTCTCTCCCCATGGGTTGAC

CGAATGTACTAGTTTCTTAGAGCTGCTATAACAAAATACCACAACTGAG  
TGGTTTAAAAACAACAAAAAATTATTCCTCACAGTCCTTAGGCTAGCAG  
CCCCAGTTGAGGTGTGAGCAGAAAGAATCTGTTTTTCTCTCTCCTAG  
CTCCAGGTGGTTGTGTCAATCCTTAGTGTCTGTCAACTGAGGGACCCTCA  
AATGTCTGCCTTCATCCTTACATGATATATTCCCCCATGTGTCTCTGTGT  
CTTCGCATGGCCTTCTATAAAGACACCAGCAACTGGACTTAGGACTCAC  
TCCAGTCCAGTATGGCCTCATCTTAGCTAATTATACCTGTAAAGCTCATT  
TTATTTATTTATTTCTGAGAGACACACAGAGAGAGAGAGAGAGAGAGA  
GAGAGAGAGGCAGAGACACAGGCAGAGGGAGAAGCAGGCTCCATGCAGGG  
AGCCCGATGTGGGACTCAATCCCAGGACCCAGGATTAGACCCTGAGTCG  
AAAGAAGAACTCAACCGCTGAGCCACCCAGGCATCCCTATAAAGCTCATT  
TTTAAGTGAGGTCACATTCTTTTTTTTTTTTTTCTAAGATTTTATTTAT  
TTATTCCTGAGAGAGAGAGACACACACACACACACACACACACACACA  
CAGAGAGAGAGAGAGAGAGAGAGAGAGGCAAAGACACAGGCAGAAGGAGAAGCA  
GGATCCATGTAGGGAGCCCAATGTGGGACTTGATCCCAGGACTCCAGGAT  
CACGCCAAAGGTAGACGCTAATCCACTGAGCCACCCAGGGATCCCCCATG  
AGGTCACATTCTAAAGTTCCAGGGGGGCCATGAATTTTAGGAGAAAAACA  
CTAGTTAAACCCAGTCCACTGGGCCACATTTTTGATGCTGCTGTATAAAGA  
CATCACTGTTTTTGATAATTTCCACAGTTCTATAAAATCTCAGCAAAGGA  
AAACCAAAGAACTTAGAAATTAAAGCTGATTGGAATCAAAGAGATGAAA  
GCCCTTATCAGGGGTCTTGTTCAATCAGGAAGTCTATTGGCCAACGGTGA  
GCTCAGTGCAGGAAGATAGAGGAATCTATGTCGCATAAGATCTGGCAAAG  
GGGAGATTGTTGGCAGGTAAGTAATTGGCCTAATCTTTGACATAGAAATG  
TTAGTCCTTTTTATCCTCAGACAGGTTGATTCTATGTTCCCTACTTCCAAA  
TTCCAATGGATTCTTGCTTGTTGATACACCTTGCAATATATATATGCATT  
TTTCCCCCTTTTCATCCCCTGTGAGAAAAGGGTCAAACAGTATGAAGTTT  
TGTGACTATATTTGGCAACACTGAAGACAGAGCTCATATAAACATGGGGA  
TGAGCTACTGACCAAGGTATCAAAGGATGGAGAGGATTTTGTAAAGTGGTG  
ATGGAGGACCTCCCTCAGCTGAAGAAGCAGCATAGTTTCAGAAGTGAGGA  
AGTGAATGTTCTGATCAGCTTGTCAAGTTGTCCCGCTTGGCCAAATTGTT  
GTACTCCCATAGTCAAATCTAATGGGACATAGTTCTGAAAAGTTATGTTG  
GGGTCAGATAGTGGGCAGCTTGGAATAACAGGTCAAGAAAGGAGTTTGA  
TATATTATAAAAGTACTAGATTGCATCCAAGATCTTTAAGCGGGGTGGG  
GGGTGGGGGTGGGGCATGATCAGGTCATGTGATAAATGTATCTGAGAGG  
GAAAAGGATGAGGATGAAGTTATCTTTCAGTGAGGATTTGAATAACCCAC  
ATGAGAAGGGCTGTGTATTTGCACTGGGACGTTGGTCCTGTGAATGGAAA  
TAAGACGCTGCAGAGAACTTCAGAAGCAGAAATCATATGCCTTGAAGAT  
AAGGCATTGAGAGAAAAGTTCAATAAATCACTTGGACTTCCAGTTGGATC  
GAGAGAGTGATAAGGCAAATAATAGCATAGTTAATCAAGAAAAAGAACCT  
GAGGAGAAAAACACGCTTTTGTGCGTTTTTGTGGCTTGAGAAAAGATC  
ATCCATTTGATTATACATCTATTGAGTTTAACGGTGCCAGTAAACCATCC  
ATATGGGGATGTTTAGGTGGAAGCTGAAATGTAAAATCTGGACCTTGGCA  
GAAATCCCTCGGTTTTTCACAATGTAATATGGTAGAGGGCCACAGGAAAGT  
GTTAGCTGCATGAGTAGAGATGTTTCTCAGGAAGAGGGTATGAAGGGAAG  
ACCAGGGAGACCCTGGGCATGAACTCAGTAAAACCTAGAAAGGTTCTTT  
GCAGGTGGAGCCAATCATTGTTTTTACACGTTGGAGCCTCAACGTGTGTG  
TGTGTGTGTATGTGTGTGTGTGTGTGTTTAAAAATAAGAACAACA  
CCAAAAACAAATGAGAGAAAGAGCTAGAAAAGAGCTGTTGGTTTTAAAGAG  
AAATCTGTGATGGGGAGGTGAAACGCAGCAAGCTGTTGCAATGCATGGA  
TTTTCTTTTGTGAGTGAGTTGAAATAGGAGAATCAAGGAAGTGAGGGATG  
AAATGAAAGTGGCTTCTGCTGATAGCGTGTTTAAAAATGCCTGTCACTGGT  
TCATAACTGGGAACACAGCCAAATGAAGCTCAGGGCAGTCAGAAGGACTG  
GGGAGAGAAGGATAAGGTAAATGACTAGAAGTCTCCATCATGATTATGAA  
CAGGTTCAATCGGAGTGGAATAATGGGAAGGGAGAGAAAAAGAGAATGTG  
ATCAGACACAGCATTTAGATCAGCATGTGGCTATTTTTTATATTTTTATG  
TCTTATAGAAATGGTATCAGGACTTCCATTTTTTAAATTTGCTTTTTTAAAA  
TTCACACCAGCCACTTACTGGCCATACCAGGAAAAATAGGCACCTAGTGT  
CAGGTAAGTCCAGGAGACAATTCCAGCACAAAGACCTGACCAAAGGGGCG

AATGCTCAGTAGAGAATCAGGAAGGTTGGCTTTTACTGGGATTTAGCCAG  
AAGAATAGAGATAATCATCCAGTTGTTCCCTAAGAGCAAAATGGAACAGGA  
ATTGAGAGAGCACAAAGAGGGATCATCCAAGCCACGGAAGAGACCCAAGT  
TGGTTCTGTGTCGTTCTGACTCATGTGTATCCTTAAAATCAATCCAGTCT  
TTCGGGGAGCCCAATTAAGTAGCCAATCCTGCATAATATGATTAAAAATA  
GTATAAAAATAGAAATAAGCCAATCGGAGAAGGACAAACATTATATGGTC  
TCATTCAATTTGAGGAATATAAAAAATAGTGACAGGGAATAAAGGGGAAAG  
GAGAAAAAATGAGTGGGAAATATCAGAAAGGGAGACGGAACATGAGAGA  
CTCCTAACTCTGGGAAACGAACCTAGGGGTGGTGGAAAGGGAGGAGGGCGG  
GGGGTGGGGGTGACTGGGTGGCGGGCACTGAGGGGGACACTTGATGGGAT  
GAGCACTGGGTGTTATTCTGTATGTTGGCAAATTGAACACCAATAAAAAA  
TAAATTTATAAAAAGATAGCACATGGAAAGCAAGGGTCCACACAGACTCG  
ACGAGTTGATGAGTCTCACGAACAGACACTGCTGATGCTTCACTGTGAAC  
CTAATTTCCCCTGCGTGTTTCATCTCCTTTGGGAACCTGGACCAGCCTCCA  
TCACCTTTGTGGCAATCTGCCACAACCTTCTAGACAATATGTTCAATGTAA  
CACACCTAACCTAGGTTCTGAATATGCAACAACAGGATGCCGCTGTCTCC  
CTATCATAACTGTCTCCATCCTTGGGAGGGTAGTTAGCAAAGCTACTGAG  
CACTAATCTCCTTCATGTTGAAAATAAAACAAACAAAAAAGTACATTCC  
TTCAGCATCATACAGATTTGACTTGTTGCTCGCTAAACTCGATGTGGGTG  
TACATGATCGACCGAATTAACCTCCCCTGGCAAAGCTAATAGGGACCCGGA  
GCATTTGGTTTTTGGCTTGCAAAGTGATACATCTGTAGTATTCCAAAGAGA  
GGCGAAGAAAAGTAGAGGCTCTCAGATTTCTTTCTTTGTTTCAATTTCTGCT  
TCCTGTTGGATGTTGGGAGGGGTGACCAGCCTCTGGGGATTAAGACATT  
CAAAGTGGTCAGTAATTTCCATAATAGGATTCCGTGATCAGATTCAAAAG  
CAAAGAACAATAATAGGAGAGGATAAGAAGGATGAATGACTGCCTGTCT  
AAAGTAGGCTCTGGGAGCTGGGAAACAGGAATTTTGAAGAGAGCATTTTG  
TTTGTCCTCAAGACATACACAAATACTAGGCACTATTTAAAGGAGGAAGT  
CTTGATGTCTTAGGGCATTATGGAATGGTTTCTATTCCAATAATGCACC  
ACAAAGTTGAAAGAACAAGAATGACATTTTAAAAAGGAGAAAAATGGAAT  
TGGGAAAAAATTTAGCAGTCAGCTGTTAGAACAAATTTTGGAAAGAGCAA  
CTGGAGCTCTGAGAGTAGGCAGGAAGAAAGAACCTAAGGCCAGATTTCTT  
CCTGATTTTGACTTTTAAATGAATCAGTAATGTGTAGAGTCATGTTTAGGA  
TACTTTCGGAAAAAGGCATTAGCTTACTTCTTTACGGAATCAAAAAACA  
ACAAATAAGGGATTTGGATTGAAAATCAATCTCTTTTTCTCTCTCCTTCT  
CTTCTTTCTCTCCTAATATGTATCTTTATCCATGTCAGACTCACTGTTTG  
TCCTCTTGATTGCGTTTTCGTAGTTTTATGTTTTAGGTAGTGATGTTAACA  
CTATTGCTTCCAATGTTGAAGTTAACAACAGGCTATGGAGTCAGACCAAC  
CCGTTTCAATTCTCCATCCATTGATCTCTGTTAAGTCACACTTCTGAGAA  
TCAGGTTTTGTTTGCTTTCTATTAAGACTATTTTTTTAGAGCATTTTTTAA  
GTTTACGACAAAATTAAGAGGGAAGTACAGAGATGTGCCCCAGCCCCAAC  
ACATGCTTAGCTTCTCCTATTACTGATATCACTCACCAGGATGATATCTT  
TTCTTTTTTTAAAATATGGATGAACCTGTATTGATGCATCATAATCACCC  
AAAGTCCATAATTTACGTGAACGTGCATGTAAATTCCTGGTGTGTACGT  
TCTCCGGGTATGCACAAAAACATAATGACACGTACCCAACATTAAAAGGT  
CATGCAGAGCAGTTTCACTGCCCTAAAAGTGTGTGTGTATAAATACAAGA  
AATAAAACATTGAAAACCCATATTTGAAAAAAGAGTAGCATTACCCTGT  
GGGGTTGTTATGAGATTAAATGTGATACACATAAAGCACTTAGCAAATAA  
AAAATGTGAGTATTACTTTATTATTGATGATATTTAAAAATTGAATTTTC  
CCTCCTGTGTCCATTGTCTTTCCCTGCTCCAGAAGCAATTGCTATAATG  
AATTTGGTTTTATAGTCTTACGATCTACAATAAAGTTATGAATATACATGC  
ATTTTATCATGTTCTCTGTATGTGCAGGTACATGCACCTTTGTGCTTTCA  
CTTTTACATAAATAATAAAATAATGTTCAATTTCCCTTCTGTAACCTAATTT  
TTCACCTCAATTTAGTTTTTGAAATTATTCATTCTGATATATATGTCTCTT  
GTTCAATTTCTTTTAAAGTGTGCATACATTATTCTGTGCATATAAAAATCCCAT  
ATTTTATTTGCCTTGTACCTTTCAATGAACCTTTTGGCTCATTTCTGACTT  
GGAGTAATTATAAGCAGTTAACATGGGTATTCTCATGCACATGTCCTTTT  
GCATATGGCTGTTTGTTATTGTTTTTATAAATTATATACCTAGAAATGGA  
CTTTCTGAGTTATAGGCATGCACATTTTTTAGTTTTGCTAGGTATTTCCAC

ATTTCTCCAAAGTAGTAGTACCAATTTATGCTTCAGTAGTTTGTGAAAG  
TTCTGCTTTCTGATCATGAATAAAAATACCACACCTCTTACTTTCTGCA  
GTTTTGTAAAATAGCATTTTATCTTTGTTTTGATTTACATTTAAGCAGTT  
CTTCCAGAACAATGTAAGAGATAAGGAAAAGCTGAAAAATAGTATGAAAA  
TTCGAGGCATCACAAATTTTTTCCCCCTAACTTCAACTTTAACTTTATA  
GCCAGGTAAACTGAACAGTTTTTCAAATTCTTTGAATATTTGAATTTATT  
GTTTTTTGAAATGCTTTCTTAAACATTTTGCCTATTTTTTCCCTGAGTTA  
TATGCCATTTTCTAACTGACTTGTTAGTCTTTATACTGAATACTAATCTC  
TTATGGTTCCTAGATGATGTTAACTTTGGTAATGGTATCTGTGGTTATATG  
GCTTCCTCTTTGTTTCACCATAGCTATATTTATTCATCTCTCATTTTATG  
CTTCAAGTCTTTGTTTGAAATTGTGTTTGCAGTTTTCTGCAGTTCCAATG  
GTTATCAAAGTTTAGCATGCACAACCATCGTTTGGAGAGCTAGTTCAAAG  
GACATAATTCTGGCCTCCCTCTCTTGAAGATTAAGAAGTTCTAAGGTAA  
AGTTTGCACAGAGTAAGTTCTTTAAAAAAGATGCTCATGCAAGGTGATC  
TCCAAATATACCTTGGAATAATGCTGGGGTGCACCATATTGGAATTACCAC  
CAGAAGACCAGGAACTGCTCTCCATTGAATCATTGTATTTCTTTTTGAG  
TTCACAAAAAATATGTTGGGGGAGGGGTGCTCTCTGTCTGAAGCAGCA  
CCAAATCTGGGGAACGCATGGAGACAAATGTGCAGAATCATTCTGGTAA  
TGACGAAGGAATACTGACTTTTTTCAGCCCTTCTAACGTTTCTGAACCGA  
GGAAGGGTAAATCCATGTATTACAAGAATTATGGGCAATTAAAAACAAGA  
TCCTGCAAAGGCATATTTTCTTTATTTTATTCACGTCTTCTGGTGAATTT  
TTTTTTAAAGCAGTGCTTCCAAACAGCTATTTTGAAATGAACAATAAACA  
CAGCACAAAGTATCTAAGACACAAGCTTTTAATGAGAACAAATGTAAGAGA  
TAAAGAAAAGCTGAAAAATAGTATGAAAAATCGGGGCATCACAAGTGTTT  
TTTTTTCCCCCTAACTTCAAGGAATTAAAGAGAGATTGGACTTAGGTCTT  
TTTCTTGTTCTCAGCCAGATTTATTTCCCTTTTGTATTTATGTGCAATAT  
CAAATGTTTTAATGTTGTGGGTTTGTCTGAACTCCATTAATAAAGTGGC  
TTCTGTCTTAGCTTAGGTAAGCTATTCACCTAATTTAGGAAATAACTGA  
TCCATGTTTTGAGACAAAGCTCTTTTGTTTAAAGGACTTTAAGATTAGAA  
TGACAACCAAGGGACATTTGACACAAATCCCAGAAAGTCTGAGAATGGA  
TTTTCTCTGTTTAGCACATTGCTGCAGTTGAAAACATTAAACAGAAGAG  
AAATGTCCAGGAGAAAAGCTCCCATTTACCCAGCCGAAGTAGTAGAACTG  
ATATATTCTTTCCAACAGCCTTTGTTTATACTCCTCAGAGGAATAGATGA  
ATTCTAGTTAGGTGTTTTGGTCAGTTTTATTAGGAAGTTGACTCAGGTCT  
GTATTGCTTTTAGAAGCCAGACAGAGGGCAGGAGTCTACTCACAAATCT  
TTAGGAAGTGTTGAAAGCTGAGTCATTTACAGACGTGTAAATCCTGTTGCA  
ACAAACAGCACATATTTGCTTATTTTGGACAGATATAGAAAGAAAAAAT  
TAGATGTGAATTTAATATCAAAATGGAGGCCGGATGAAATGGATGAAAAG  
ACGGACATGGCGGCATGGAAAGATCTCTTTCTGCTCCTCTGTCCCCCTGC  
TCTACCTGAAATATTCTGCTCTCTCCCCACCCTCACTTCACTCTCAGCCA  
TCAGAGGGAAACAAGAGGAAATTCCCAATCACACAATGATCCATACAGTA  
AATTATATCATGTGCTCTTTGGAAAAAGTGTAACCTCAACTTTAGAGTG  
AATGTTACCTTTACACTGAGAATGGTCAAAATATTCCAAAAATGAACAAT  
GTTTGAAGATAAATTAACCTTGCTATATTGCAAGTTGATTTTAAAGATAAG  
GGATATATATGGATACATATGTTATGTTATATGTATACGTATCCATATAT  
ATGTCTGGGTTTTGGAAAAATCTGTGATTGAATGAGTAAATAAAACACTTC  
CAAATAGACAATTAATTACTTTTGTATAGAAATCTCAAACACCTCAAATA  
TACATGCATAGGTTTGTCAACAGCCTCTCCAAAACATGTAATTCCTGTTT  
CATAGCTCGATTGACAGGAAGCTCTTCAGTGCTTTGTTTCCAGGAACACA  
GAGAGCCAGGGTGTTAAGTGAAGACTAAAATGTAGGGGATCTGACTCCAG  
TCTGGCCACCTCAAACCATATACACCATGAATGGCCACATGCCTCACCTTT  
CTCCTGAACTCTGATAGTAAATATTTGACTGGTAGAGCTGGTGAGGACCT  
GAATAGTAAATATTTTACGAGGGGAAATGGGAACCTCCCCTTTGCTCTGTC  
CTACCTTTTCATTAAACATATTAATTTATATTAAGTGGGAACCAGATTAT  
TCTCTATTTACCCCTGTCAATAATTATTCATCATCTTGAATCCTGAATCC  
TGCTTCTATCATAAAGGGGACACACTTTTTTTTTTTCTTTTGCCAGATTGG  
GATAAATCTAAAGATGTTAATGGAGCATGCAGCATTGATTGAGAAAAAT  
CAGGAGCCTCAGATAACACATAGTGCACGTGGATGATTTATTATCTGATA

AAAAGTAGAGTGATCAACAGAGTCATCTTTTTTCCCCCTTCGTCCTTCCC  
ATCAAACCTTCATCTTTCTTTAAGGACTTAATAAGTGAGATCCCGGGCTGC  
TGATTCCCTGCCTATCCAGGTTTTAGAACTTGGCGGACTCCTTCCTCT  
TTTCTCTGAGGGGCAACAGCTGGTTTTTCATTACGCATCAGATTATGATA  
CACACCGAAAAGAAAATGGTCACAATGAATAAAGAGGGAGTTCTGGTAAT  
ACTGTGGTTTTGTTCTGGGGGTGTCAAGGTGAAGAATCCATCCTGTTCTT  
CAGACCACTGTAAACTTAATCCATTTTCATTATACACACGAATGAAATTCA  
GCAGTGTTCCTTAAGAACCTCTGTCGCTTTTATTTACTGTGGGAGAGGC  
CCCTTGGTTTTCTTTCTTCTTCTTCTTGGTAGAACGCTAATGCATTTTAT  
ATGCTCTTTAATCTCAGTCCCAGTTCTGTCAATATTTGAGCTTATCTTAA  
AGCGAAGAACTCCAAAGGAAAGTCAAAGAAAGTAAATTCTCATTCGGAA  
GGCAAATAACAATTATTTTCATTAAACATCCAAATCACAAAGTGCCCCCTT  
GGACCAGTTCTAGTTATAAAACAAAAGGGAGCAGTTTCCCCCAAATCCCTC  
CCTTTGTGATCAACACTTAAAAAGTCGCAAGTTTTCTAATATGGGATTAA  
CCTTCCCCAACATGTATCATTCTGCTAACAAATTCAGTGACACTGCGAGT  
GGTGATCTCTGCATGTGTCTCTCTATCTTGGGAGTGGCTATTCCTCAA  
GATGACAGGTGGGCAGTGGGGACCTAGATAGTGATCCCAGGTTGGCCAC  
TGTGGTTTCCTTATGAAACATCACTGAGAGAGCAGCACGGCAATCTGCAT  
CTCCACATGAGCCAAGCAATTGTGATTGCCTTTTGGTCCTTCACACTGT  
GATGCAGACAGAAATGCAGACTCGAGTTTAATTCATGATTATGGATCCCA  
CCAGGGCTGTACAGTTGCTCAGATGGTTTGAAACATTTTCCCATGAGCT  
CCCCTTTTATAAACTCTGGTGATTATGTTCTCTTAATAAAAAAGGAGCC  
CAATCTGGGGGAACCTGAGTGGGCTGAGTGTGGGTCTGGTCATGATCTT  
GGGGTCATGGGATCAAGCCCTGCATTGGGCTCCACACCGAATCTGCTTCT  
CCTTCTCCTTCCCCTCCAGCTCCTCCCTCTGTACTCTCTCTTGTCTGTC  
TCAATAAATGGATAAAATCTTACCAAAAAAAAAAAAAAAAAAAGAG  
CCCAACCTTAACAAAAGCATTCACAAAAGACACATTTTGGTTTCCCATAC  
TGTAGCTTCTTAAGCAACAGGAGGATGGCCAAGTGTGGTGGATGGGGTTT  
GCTGGTAAGTGGGGTTTTTACACTCTCCACAGGGCAGGAAAATGCAGGCA  
CAAAGAAAAGCATATATATAAACATCTACTATTAATAAATGGAGATGGGCT  
GGTGGCTTACAATTCCCCCCACTTCTGGGTTCTAGCAAGGAGAATAAAG  
AGATGCAAACATTCTTTTAGCACAAAACCTTAGGGGACTGTTTATATGGA  
CAGTGCAAAAACCTGGTTTGTCTGCAGATTCCACACCTGGAGGACAGATT  
CCACATGCTGCCGTGGCTCTTCCCTTTCTCCTTGTTCAGTTTTTTACA  
CCATTGGGGACCCCACTTCCATCCTGCTGGGAAGCAATTAGTGCTGAAGG  
AATGGCAACTAACACACAAGTGGCAGGGTCATGAGGATAGGGAGCAAGAC  
GGGGGGAAGAAAGAAAGAGAGGCCATGGGGGACCAAAGAAAGGAGCTTG  
GAAGCCAGGCAGCTTCCTCTGGACGCTGCTAATGGAATAGCCATATGAGT  
ACTCCAAAGGTAAGCTGGAGGAGCTTGAATCTGCATAAAAAACAAAAAAG  
CCAAATCTGGTATAAGAGAAGAGAGCAGTGTGGCCGTAGAACTTTCTGC  
TATGAGGCAATAACCTGCAACCTGCACTGTCCAAGGTAGTGGCCATTTGT  
GGCACATGTGCAAGTGAACATGTTCAATGTGGCCAGTGCCATTAAGGAAG  
TGCCAATTTGGGGTGAATGGAGCTTTTTATTCTATTAACGTCATGTACT  
CTTAAGAGTCATATGTGGCAAGTGGCTACCACATTGGACAGTGCAGGGAC  
AGAGCAGCTGCTCATGGATCCCTACCTCTTTGTGTGAACCCTTTAGCAAT  
ATCAAGATATTACCCCAAATGAAGGACTGTTTATGTATTATTATGGATAC  
TTTGTGTTTGGTTAACATAAAGAACAAAGTTAACTACCCCAATACATGGC  
ACAGTGGGGAAAGGCTCTGGAATCAGATGGAATTGACCTTACACCCTAAT  
CTCACTACATAATGGTTCTGTGACTTTGGGCAGGACACTGAATCTATTTT  
ATACTTTGTTTCTTCTTCTGACAAAATGAAATTAATAATGGCCATTCACT  
TGAGGGTCACGATGATAGAATTAAGTGAGTTTGCCAAACCCTGTAAGTTC  
TGTGGTGGGTCCCCCACCCTGAGTTGGCGACTTCTGTGTCTAACCGTTA  
AGTAATTTATCCAGGATCATTATAGACCTAAAATAATAAAGATGATGAT  
AATTATAATAGCAACAGAATAGCAACAACAATAAATCCAGTTAGCACTGT  
ATTTTATTATACCTTCTACACACTAGCTAACTAACTTTGTTGTATCAAAA  
AAACCACAAAATATAATGGTTTAAAGAATAAAGTATTTATTTCTCTGCC  
ATATTACTGCCCCGAGCTGAGCAGTTCAGACTGATGGGGTGGCTCAGTTG  
CATGAGGGCAACTGAGGTCTCTACTTTTCCCCCTTTTGTTCCTGTCTAC

ACCCCTCTCACCCCCTCAGAGCAGGCACTGGTAAACCACAACCTCAAAGCT  
CAGATCCAGCCTGCTCTCTATTTTTGTATATGAAGTTTACTGAAACATG  
ACCATTCCTGCTTATGTATGTGTTACCTATGGCGGTTCTGATGTCCTAAA  
GCAGAGTGGAGTATTGCAGAAGACCATATGGCTACAAAAATCGGAAATAT  
TTTCTACATGACCCTCTAGAGAAGAAGTTAGCAAACCCCTGGCCTAGAGT  
ACCATGGTCCTCTGCAGGCTTGAAGCTGGATCATAGGCTCAACCGTGTCA  
TAGGGAAGGACACAGGCAGAAGTTTTTTTAAGGAGAGGAAGATGGCACAC  
ATGACCTCCCTCCCCCATTTTCATTCATTTTTTAAATTCACATAACAGAT  
ATTTGAACCCAAATTTATTCTAGCCACAACCTCGAGCTACTTGCAACATAT  
CCCTCTGGTGAACATTTGGCCACATGGCAATATCCAGACACTTAGAAGTT  
CCAGAAGTTTCACATATATGTATGTTGTATATGGTCTCCAGGTGAGGCTG  
TGTGGCCAGCTTAAGCTCATTATTATTAACCTTTCCACTTCGCAACTATAA  
AGTGTTACCTGGCGATGGGATCATCTGATTAAGGAATAAATAGCTCCGGA  
GAAGACCCAGATGGAAGGCAAGACAGCAGCAGTAACATTTTTCATATAATT  
GAGATCCCATAATAGGAGATTGAGTTTCCTAACTAATAAATGTTTTCAAG  
CTTCTGCTATATGCCAGATTTTGGGAACACACAGGTGAAAAAGCCATGTG  
GTCTCTGTGAATGTTGAAATTCAGCAATCTACTTAATACTCTGAGAAATT  
CGTGTCTGACAGCCACATTCTTCTAAGATACTTCATACAGGGAAGAGTA  
CTATCCCTTTTCTGACTCAGCAATAAGTTTCTTCTTGAGGAAGAAATTAG  
TTTTATATACAGACAGACTTATGTTTGCTCCGTCAGCTTCCTTTCTTGTA  
AGGCTGAACTGCACATTTATTCTTTCAAAGGCAAGACATAAAATTCCAAA  
CACAGATATAGGTCTATATGTGATTTCCCATAAAGGATGTATAAACTAAT  
TAATGTTCTGGTAACACTTTATAGGATACAGGGTTTCAGAGAAGCATTCC  
ACTGAATTTATAACTCCGTAACCATTTGGCCATTGACTGTTTTGTAGCTA  
ATCCTGTTATAATTACAGTAGAAACAAAATAAAACACCAAACAACCACCT  
AAGTGGCATGTGTAGAATGTTTTCACTTACAAGTCATTCTTATAAAAAGT  
GTCTCCTTTGATCCTTACAGAAAAGACATGATATATATACGATTTAATAG  
ATTAAGGAGATAGGAAATAAAGCTGGGGCTCTGAGATCTGATCTCCTAAT  
CATCCCCCGAAGTGCATCTAATTTGTTTGAAAAATTAAACTAATAAGA  
ATGAAATCCTAAGGGGACAACCTGGGTATGAATATTGAATTTCTGGCTACA  
GTAGAATTTGTTACCGTTTACATGGAAGTTCGTGATAATAAAATAGAACA  
GCAGAGAAAAGAAAACCCCTGGACTATGAGTGAAACACTGTGTTAGTTCAAC  
TTCTGGATGTCCAGCTCTTGTGAATCATAACAGCTGGAAATGAGGACCAG  
GAAACTGCCACTTAATGAGCCACCGACGAGACTCTGATCAAGTCCAATGA  
GAGGGCTGTACACTAAAAGAGCATCCAGTGTCTTGGGATAAATAAAAAGG  
AGATGGCACAGATCCTGTGAGTTGAAAGGGAAAAGAGAAAGTTTGTGAAT  
CATTTTTTTTTAAATTTATTTATCAACAAATATTTATTAAAGATGTATGAT  
ATGCCAAGTCCTGTGCTGGGTGCTAGGAGACCATGGTAAGCCGAAGAAGC  
AAGGCCTTTCTACTCATGGAGTTTATGCTCAAGATAAACATTATAAAAGA  
AGCCAAATTGGCATATGATGACAGACTGGATAAGAACAATTAAGCAGGGG  
GATTGTTTCTGACTGGTTCTAAAATTTCCAGTACTGAACATTAGGGGGGA  
AATGTGCTTTTCGTTTAAATGGAGGAATTGGTCAGTGTGATCACTACCATT  
GGAAATGTGTTTCCTTTTAATTTTGTCAAGAGTAAGTTTCAAAAAAGAGAG  
AGAGAGAGTGAGTAGGTTTCAGCTGATATAAGAAGGTGAATTTAGGATCC  
TCTGAAAAAGCAGGAAAGGAAGACAAGAATTCATTTTGGGTACAGGCCAG  
GGGGAAGCAGATGTGCATATAGTCCAAAGAATAGTTAACATCATGCAGGT  
GAATAAATGGATCTAGAAAGTGAGACCTTAAAGAGGAGAGAGTGGCAGAT  
AAAATGTTTGGCTTTTCTGCTCACAGCGGAGAAAAGGGAGATGAAGCAAAG  
TGGTGATATGAAGCAAATACAGAGGAAAGCAGAAATAGAAGCATTAGAAA  
ATCATGCAGCTGGAAACCAAGGAAGAATTTCAAGGACAAAATTCAGGTCA  
CACAGAGGTGAGGGAGCTTAAGGATTGGGGATGGCCATTTGAGTAAGTCA  
AGCTGAGCATTTCTGAGAGTGGACCTAGGAGGGCGATGGCACGTGGAAAG  
AAGATTTTCGGATGATTGACTGTGACCGGGTAGATAGAATGCAGGGATTGG  
TAGAGGCTGGCTGATGAAGAATATAAATTTGAAAGTTGACCAAAGACATA  
CTAGGTTAAAGTTAAGAGGAGTTTCATACACACACACACAAACACACAC  
AAACACACACACACACAAAAACCCATATATATCATTACTTACAGAAAATA  
GGAACAACAACAACAAAAAAGCCCATGCAAAAGAGTACTTGAAAATT  
GTACAAAAAGAGTGAAAAATTCTGTAAATGGTGAAGAAATGGGTCCAGAG

GAGTTTTAATAGTTCGGAATAACTCCCTTTCAAGTCACATATTTCTAAGA  
AATAAGATCTCCTGGATCTATTAAAATGCAATCGTTAACAGTTTTTACTT  
GCATTTACTTGTTTTACGTTCTGACTGTGGAAGGAGGTCAGTGTTCATGC  
CACGAGGCACTGAAATGACATGACCAAGGTAAAATTTTCTGTCTGTGCA  
AACGTGCCTATCTGGGTTTTTCCCCAGGTGATCACCTAACCCCTCAATAT  
TTTTTCCACCAGGTGGCAATGCCCCCTTACGATTGAAGAACTGAAAACCTC  
AACCTGACAGAAACAGTGAATAATCTGGATTTCTAAAAGAACATTCTGAC  
AACTGTCTTTGTTTAGAAAAGTTGACATTTTCATCAGAGTTGCCTCCTGGA  
AAATCCATTACGGATCTCCAAACTGCTGATTATACACAACCTGAATAAGA  
AACCTAAGAGAGGGTAAGAGAGTGCTTTATATCAAAAAGAGGTCACCCGA  
TGTCTTGAGCGAAAAGGGAGTTTTCTAGAAAAGGAAAGGAAAGGTTTT  
CTCATAATCTGAAATTTGGGGAGTACTGGGCAAATAATCAAAACTCTGAG  
ATCTCCTCAAGAAAGAAAGGATGAGTGAGATAATTAAGACAGACCACAAA  
ATGAAGGAGTAAGGGGAAAAATTCAGGGATTTCATCAATATTCCTGAATTAG  
TAATCGATACATATTTGTTGAAGGGTGACAGGAGAGAAAAAGGAGAGCCT  
TATAAGATGTAGTTAGGTTTTAGTCCTCCAGAAGTTGTTGAAAACCTGAA  
AGGAAACTTATTTATATATTAGGGTATAGAATAGGACAGGGGTGCGCCAA  
CTGTGGTCCCTGACCTATATCTGGCCTACTATCTGTTTCTGCAAACCAA  
TTTTGTTGGAACAGCCACACTCACTTATTTACACGTTGCCTCTGGCACTT  
CCAGGAGCTTTAAGAGCAGAACTGTGCATTTACAATAGGGACCATCTGAC  
GGGCAAACCCTGAAATACTCATTATTTGGCCCTTTGTGGTAAGGTTTGCC  
TCTCCCTGCAGTAGTGTTTAAGGGCAGGGGTTTCGGAACCAGACAAAGGTG  
GACCTTAGTCCCGGTTCTAATATTTAAGAGCTGCTTGACTCTGAATAAAT  
CTTAAGGATTAAAGCAAGTCCTGCTTTTAAAACCCCTTAGCAGCACCCCTGC  
TGGTACAGAAGCCATGTTAGCCCTCGCTGCCTTCTTTCTAAAGTAGATG  
AGAAAATTTCTCAGTGACACTCATCAGCCTTCAAACACCAGCACCAAAA  
TCCTTGGTCAATTTCTAGAACTGAGAACAAATGCACCCCATTTGGAGGCTGC  
TTTCTTCAAGTAGTGGCTCTGTTTCTTCTTCTTCTGCAAGGTCATGTTT  
CTTTTTTCTTTTTTTTTTTTTTTTAAAGATTTTATTTATTTATCTGAGAGA  
GAGAGAGAGAGAGAGAGACAAAGAGAGAGAGCATGAGTGGATGGGGAGAG  
GAAGCAGAGGGAGAGGGGGAAGCAGGCTCCCTACTATGCAGGGAGCCCGG  
CATGGGACTCGATCCCAGGACCCCTGAGATCATGACCTGAGCCAAAGGCAG  
ATGCTTCACCAACTGAGCCACCCAGGCGCCCCCGAGTCACACTTCTGGTA  
TTTAGCAGTCAATAAATACCTTCTAGGCTTGGGGCTGTCCAGGTCTGATA  
CCCATCACAGTCCCAGACCAAAAGCCTGGGTCCCGAATCTCATAAAATGC  
GATGGAAACATGAAGGGTGGAAAGGATTTGGAGCTTGTTTGGAGCTGC  
TTGTGACCCGGGGTATCTAAGGTCCAAACCTGGCTCACGGAACATGTCAA  
GATGATTTCAATGGTTCTCAATCTAATTTCGAACGGATCCAGTGCTTAGT  
TAGCTGCCAGCAGAGGCCTTTGGCAAACACCTGTAGGAGAGTGTCTGAAT  
GTAAAGTGTGAATCACTGGAAATGGGAACGCTGTCAAAATAAGGGAATTA  
CGTTCATTAGAGGTGTGGTAGCTCAATTTACTGCGCCAGCACATAATGAT  
CGCGGCTGGCACTGAATGCTTAAC TAGCGCAAACCCACCCAAACTTGGCA  
AAATAGGTGACCCCAACCCACCCAGCCTCTTGGCTCTCTCGCCAGGTTAA  
ATGTGCTTAAATTAGTAAAAAACTGGGTTTGGACTGTGGGCCTTCCTTGC  
CTTCTAGATTGGGGCTGTGCTGTGTCAACACCTTAAGGACAAAAAGCAAA  
CAGACCCCACTCTGTTTGTGGGGTCGTGGGCCTGACATATGAGGGGAGAG  
GTATTGCCTCTAGAGTCACAGGGTCTTCAGGGGCTCTTATTAACAGCTTC  
AGGAACCTTATGTTTACGGCCCTATAGGCACACTTTTTCAAGACTATGTTTA  
TTTATTTATGCATTTATTTGTTTAAAGACTTTATTTATTTGGGAGAGAGA  
GAACATAAGTGGGTGGAGGCAATGAGCAGGGAACCTGATGCAGGACTCCA  
TCCCAGGACCCCTGAGATCATGACCTGAGCTGAAGACAGACGCTTTACTGA  
TGGAGCCACCCAGGCACCCCCCACCCACAACCTGCATGTAAATCCCTGCC  
TCTTGATAGAAAAGTAGGCAGGTCCCTCAGAGAAAAAAGCTGAGTGCACGT  
AGGACTGCTTTTTGGTACCATTGCAACCATCCTGGCCACGGCACAGAAGCT  
GTGGGTAGTGGGGACAGTGTGACCCTGGTCCACCCTCTGACACAGAGACC  
TTAAAATCTAAGTGAGGCTCACGTGGGCCTGTGGAACATGTCAAACACA  
ATATGTTTGCTGCTTTTCTCGTCATGGAAGAGCAAGCTGTACCTGTTTCA  
AGTGATAATGTCTCAATTCGATATGTCTAAATCCTCTTTTGCACACGATT

TGCACTGTGGAATTTATTTCACAAGAGATTTCATTTAGGGCACCTGGGTGGC  
TAAGTCGATGAAGCATCTGCCTTTGGCTCAGGTCATGATCTCGGGGTCCC  
GATATGGAGCCCCGCATTGGGCTCCCTGCTCAATGGGGGGAGTCTGCTTC  
CCCCCTCCTTGTGTGCTCACTCTCTTTCTCTCTCAAATAAATAAATAAAGT  
CTTAAAAAGAGAGAGAAAGGTTTCATTTAGTGTTTTTCTAATTGCCCTGTG  
TGGAAAATGAAAGTGAGTACCATGCCCTCACAGAACTTCGATCCAAAGAG  
TTATAAATCATTTGCAGAATGGTGACTATTAGGTAAGAGAAGGGTACAGG  
GTAAAGTGAGAAAAGAGTCAAGGGAATTCACCCAATGGTGATGTTGGACC  
TGGACGGTAAAAGGGACACGGCAGTAATAACACCTAGTGTTTTGTTATTC  
CTTGCCCCACTGCCCTCCGTTATATTTTCTAAGAAGAAAATTGAAGATTT  
ACCTAAAAGTAATAATTGTTGTAGACATGTACTCTTCTTACTTTTTCTCA  
GCAGCATGTTGTACTAGTGCTGCTGAATTTCCCTAAAAATCCAGATGAAAC  
CGGTAGAAGTTTGGAAAAGAACATTCAAGGGATGGAGTGACCCGTGTTT  
CATGACATGTAGATTATTTCTTGAAATTTGTCCATTAGTCAGGAATGGA  
CAAGCAGAGACATTATGTAAACCCCTGGTACCAGTCTTCTGTGCAGTTA  
CACTGGGGGGCCTCGCAGGCCTGGCATCCTTTTTTTTTTTTTTTTTTTTT  
AAGGAAAAGAATTGAGAAGACACCACCACACTTGGTTAAGAGAAAAAAG  
CATAACCGGGCTTCATTTTTTTTAGACAAATATGTTACTTATGGTTTGCTT  
ATTTGCTTTTCATCATAAAATTTTCATCATAACATCTTTATGCTCAAGTTA  
ACTGAGATATCTGTACTAACTGATATCTGTCATTTTGTGATGTCTTGTA  
AACACAGCTGGCCTAAATAATATTTCCCTAACTAACAGCCAAAATAAATGA  
GTTTTTGAAGGTTACTTTTTTAGGTAATCCCCTTAATAAACATTTATTGAG  
CATCTACAATGTGTTATGTGTCAGGCAATGAGAACAGAGAATTATGAGC  
AAGACAGAAATAAATTCTTACCCTCTTCTTCAGATGAAAAGAACAGACAT  
TTATCATGATAGTAATGATTAAGAAAAAAGAGCCAAAGAAGGTAT  
CCCCTACATTGTGGAAGAAGAAGGCCATTACAATTACATGGAAAGTTG  
GGAATGTGGCTGAGCAGGGAAAAGAGCAGAGAGCTTCCCCAAGAATAATTA  
ATAGAGAATTGGCTGCAATTTTATTAGCAGGAGACGTTTTTCATGACCTTC  
TGCTGTGGCTCCTCAGGCTTTGGCTTAATGTAAAGATGCATGAGGAGGTG  
CTTGCAATTTGAAGAGGAAAAACAAGTAACAAAGTAGAGTGAATGTGGTAA  
ATGGGGAGATAAACCCCAAAAGAGCTCAATGATAAAGAAAATTGGGAGAG  
AACATAAAAAGATTGGATGATTGGTTTCTTTTTTTAAAGAATGAAAACA  
AAATGTTAAAAGAAAATCTATTTTATAAGGGTTTTCCCTCACTGCAGAG  
ATCACAACCTCAGTTAATGGGGGAGCTCATCCCCTGCATCCCCAGTCCGT  
TTGCTTTTCGCTCACATCTTCTCCCCAAGTTCTGCATCAGACTCTCCTA  
TGCTGGATATGGCAGAAAAAGCCATCCATTTCACTTGCAGGGGTGTGAAT  
GCATTTTCTCTGATGTTGTTGTAGAGAAATTGCAAGGAGAAAAACCCCT  
TAATCAAAATGTAGAAGTTTTTCTGGATTAAATCCTTAGTGCCCTTTCT  
ATTGTGTACCTGGAGCTGCTTCAGGGGGAACCTCTGCCTTTCTCCAACCT  
TCACGTGCACAATGGGAAGTACGAAGCATTGCACATGCAGGGGTTAGTGT  
GGGAAAGTCTTATATGGGCTCTGGGCCCAAGGAGGTTAGAGGTTTGCTA  
TGAAATAGTATTTAGGAAGCATTTTTTTCAAAGATTTTATTCATTTATTT  
GAGAGAAAGAGATTGAGAGAAAGAGAGAGAGAATGAATGAGGGGGAGAGG  
CAGAGGGAGAGGGAGGAGACTCTTCCCTCGTTGTGAAGGGAGCCCGATGC  
AGGACTCCATCCCAGGACCCCTGAGATAATGACCTGAGCCAAAGGCAGACA  
CTTAAGTGAAGTACCAAGGTGCCCCTAGGAAGCATTTTTTAAAAGTTACT  
AATACTAAAATCATGCTAACCTGTAATATTTAGGCTCTGTGGACATCTTC  
AAGTTGTAGCCCTTTAAGACTTTTTGTTTTGTTTTGTTTTTAGCCCTTTA  
AGACTTACGTTACCTTAAACGCTCGTGTGTTTGCAAAAAAACAACAAAA  
CAAAAAACAACAAAAAAGTATGTTACTTAATAAAAAATACAGGATAG  
AGTGACTTTTTTGTGTTGCTTTTCTTTTAGTATTATTGCCAGGCAAC  
TGTATGGCAATTAATAATAATCATATCAATGAATAACAATATTTATTTT  
GCATTTTTTTTACAAGTTATGAATTGTGAAAAATCAGAGCCTACCAAATT  
TTCTCAGGGAACTCCTAAAAATCTCCATGAGAGGGATGTTGGATATTCTT  
ATCCTGAACAGTTTATAAAGGAATTGTATTTACTGAATACATGCAAAAT  
ATTGTTCTCAAAGCTTTACATATAGAAGCCCAATCTTCACAAACACCTCC  
TGGGGTAACTGTTTCTGATGATCTCTACAGACAGAAGAAGAACTAAGAC  
AAGAAGCAGTTATATAACTTGGGCCAAACACCAGCTGGTTAATGCTGAAG

CCTGGAACCCAACCCAGGCAGCTTGACTCTTGTGCATGGAAGACAACATA  
CCGTAGAGACAAGTCAACACTCAACAGTGAAATCATAACCCGGAGTACTT  
TATACTTTTTCTTTTTTCTTTTTCTTTTAAAAAATGGAATAAAATATGCTC  
AGTGTCAAATACTCAGGAACTTAAGAAAATCATAGGAGTACACATAGAT  
ATTACCTAAATCACGTATTTCAAACCCAGACATCATCCTCTTAACATAT  
TAGGCTGCTATGGGTGTTTAGTTGGGTTTTCTTTGCCACATAAAACCAC  
ATTGTCATATTCTACTGTGGCTTGTTTTCTTGTTTATTAAGATGTCCTCA  
ATATGTTTTTGTGACTAAATAGTCTTCTAACTCAGGGATCAGCAATCTAT  
GGTCCACAGGCCAAACTGTGTGGCCTGTCATCTTTTTTGTAATAAAGCT  
TTATTGTAACAGCCACACCTATTTGTTTACATATTGTCTACAGCTGCTTC  
GAGAGCTACACTGACAGGGTTTCATAATTATAACAGAGACCCTGCAGCCCA  
CAGACACCAAAACATTTACTCTCTTGCCAACCTGATCCTGATCCTCATCT  
TGATTTTAAATAACTATGCTAATAACTACTTTACTAATTATGCTAATGTGG  
TATAAACAAAATTCTATATTAGTATTTAAGTTAATAGCAGTATGGCATACT  
TGTGTGATAGTCCATTTACCGGAATAACAAAAGTTCCCAATACTTTGAGG  
GGGAAAAAAGTATTTCTAGGACCTATTTAAAGTGCCTTTAAAAACGAA  
CTAGGGGTGGTAGAAGGGGAGGAGGGCGGGGGGTGGGAGTGAATGGGTGA  
CGGGCACTGGGTGTTATTCTGTATGATAGTAAATTGAACACCAATAAAAA  
AATAAATTAAAAAAAATAAAATAAAAGTGCCTTTAAATAATTACCTAACA  
TGGGGACACCTCAGTGGCTCAGCAGTTGAGTGTCTGCCTTCGGCTCAGGG  
CATGATCTGGGGTCTGGGATCAAGTCCCTTATCGGGCTCCCTGCAGGGA  
GCCTGCTTCTCTCTGTGTATCTGTCTATGAATAAATAAATGAAATCTTAAA  
AAATAATAATAAATTACCTAACATGGATTTCCGTAAAAGAACAATGTA  
CAGAGTCACTGTGTGATATATCATCCAATGTAGAAGTCTGACAGGATAAG  
AGTAGCATACCTGGACTGTCCAGAGCAAAGTGAATCTGTGGTCACTTCCT  
AATGTTTAAACAATCCAATCATATTTTCTCATTCAGCTAAGTCTCCAAC  
GCGTTGCAATTCTTGCAATTGATCTTCCAGTCTTCTCTCTTCCTTCCACT  
TCTCTCTTCTGAAGGGAGACTATTTCTTCAAGAGGTAAATAACCCTCACAC  
TAGATATCAAGACACCCCAGAAGTGTTCCTGAGCTCCCTTTAAAGGCTCT  
TTCTGGGCTACGAATAGAAAAATCCCATGTGCTTTTGCAACTAATCCCTT  
AGATCTTTGTGCCTTCTCTCTTGATTCCCTGACGTTCTCCACACAATTTGT  
TCACTAGAAAATACATGAGTTTTATGTTGTGCTAGAGCCATTAAAGGGAA  
CATTTAGAGAAAGGAGGAAAAATAAAAAATAGTTAAAAAAAACAACCCA  
AGGAATTTCTTTCCAAGAAAATGCACCATGGTGGCTCCGAATGGGCTCCT  
GCTCGGAAATGCTGAATCTTGTGTATGAACCCTTCAATGGCAAAGGAAAA  
CAGGCCACCCTTATTAGAAATTTTCTACAGCTAGAGATGTAACATCATAG  
CTAAATTCAGTCGGAGACAGGTCGAGCAACAAAAACCAGGAGCCAAAGCA  
GTCTAGTCGGCTCTGAAATTTGATTCAGGCACCAGATTATGAATAGATTT  
AACTAGTTCGCCAAATGAAAATGTAGATTTTGGCACTGTCTGAATTTTTT  
TTTGGGGGGGGAGGGAGTATTCTATATGTGGAGTCCCAGTACACACTGAG  
GGGATATGAAAAAGAGCTTTTATATTGTATAACTACTCAGCGTATGTTA  
AGAGAGAGGGGGGAAAAAAAACAATTAACCAATAAATGCCAAAAAAAAG  
TCCAAACTCTTTTCACTGCCTAGAGCATCCAACCTTCTTCTATTTACCTTA  
CTTTTGCATTATTCAAAATGACACAGCGACAGCCATCAATAGCCAAGTAG  
TTACTCATGTAACTTATTATTAAATTGCTTACATCTGGTCTAGTCCCTT  
CCCGTAGGAACCTGTGATATGGTAAGAGGCTCAAATCCACAGCAGGTGAG  
TAGCACATTGTCTAGGATATGGAAATCAAATTTTAATTGTCCTGAGG  
TTTCTCAGATTCCCTTCCCTTTCCTGGCGAGGGTGGCAATGTGTGCCACT  
GACACAGTGAACCTCAATTTCTTCTATTTCCCTAGCATGGGCCCTCAGA  
GCACTATTATTCCAGGCTTTGTGATGATAAACAAAGATTAAACAAATGA  
AAATAAATGACTGAGCATGGGGATCTCTTTCTACCTTTTATACTGCGACCT  
GCTTCTCTTCAATCTCCAGTCTTGTAAGTACTTGGTTTTAATAAAAGTTTG  
CAAATTGCCCTTCATGAAAACATACGTCCCAACACCAAAAAAGCAAACCTA  
CATTGAAAAATCGTTCTGCTGGTATTTGATGTACACAAAAAGAATTTAA  
TAAAGCACAATTATAGGCAGTTTCTGATAACTCTCTTTTACCTATAAC  
ATGGTGCTTCTGGGGGGATTGAAAGGTAGGTGGTCAAGTGATTCTGTTTC  
CTATGTGTGTTGAGTGACTGCCATAATTGGAATTATTCTGATAATTTCAA  
CCGAAGAAGATAACTTCTAGTTTGTGTGTTATGAAAAAGCAGAGTGTTG

GACCCTGCATCTTTAAAGGCTATATGGTAGGGTATAGGGGGCCCAAGGAT  
CAGATTCTGGGTCTACCACTTTCTAGGCTGCATCACTTTGAGATCAAGTG  
TCTTAATCTTTCCAAGACATTGGTTCCTCACCTCAACGTTAGGATAATGA  
TACTAATCTAATGAGATTTTAGAACATGGCAGATATCATAAAAAAAAAA  
ATTCCATTGTGTTTTGACCCACTGAATGAGTCACTGAGGGATGTATAATA  
AATAGCAAATAGTTTCTACTCAGAAAGAACTGATGCTCAAAAGCAAGCAT  
ACAGTTACAAATTATTCTGAATTTAGTAGAGACTAGTAGGGTGCAAAGAA  
ATAGAATGGAAAGGAAAAACGAGTGACATGTGAGAATAGTACAAATGAAA  
ATATTAAAAAGATCGCATGAAAGAAAGGAAGGGAGGGAGGGAGGGAGGGA  
GGGAGGGAACAAAGGAAGGAAGGAAGGAAGGAAGGAAGGAAGGAAG  
GAAGGAAGGAAGGTGCTTTGCCTTTTATCCAGCTTTTAACTTCAGGTGA  
GAAATTTACCCCTGGTGGTATTGAGATCTGACTAACATTCACCTTTAAAT  
ATAAACAGGTTTTATCTGTACATTCACATAAATTATAAAAAATCTAGTTAT  
CTAATATGTTGTGATGAACTCATTGTATTTCTAAAGCCAGGCAATAAACC  
AGTTTATATTAGCATTTACTATGTCCTTAGTCACTCGGATAAGCAGTATT  
TATAGTGTTCTGTATGTCTAGGCTGAAAATGAATTACGATATCATAGCGT  
TTTAGCATTGGCAAAATCCACGTAAGTATATCTTGTCTTATTTTGCCAAGA  
TAGCAATCCTAAACACAGAGATAAGGTTCTGTGCCCAAGGTAACAACTC  
GGGTAACAGTAAAAACCTATTCTCAGACTTTTGTCTCATCTTGGCACTA  
TCATTCAAACCATCACAGTATGCTCTGACTGGGGAAATGAGGCCTGATTC  
CTAGCATCATGTCTAATCTGTGATGTTGCTCATCGTTGATGATTTTTATA  
CGCTTAAATACGTTTTGCTTTATTTGCAAAATGTGCATGTGGGCGAGACA  
AGAACATTTATGTTAATAGACTGACTCGTGTATCACTCAGTGCATTCCAT  
AGAATAAAGGGATATTTTTGTAAAAAAAATATTGAGGTGAGTATTTTAC  
CCATATACGTTTTTAAATACCACAAGTCTATAGACCACATGTGTACAGA  
TAGAAAAACAAACATGAAACCTCTAGAGGTGTGTTTTGATTATAGATGCC  
AGTTACTTGTGGTTGCATTTCACTCTGATTCCGTTTCAAGTATGTGCTCTA  
GGAAGTAGTAAAAGGTAGATGTTTAAAAGTAAAATATAATAAAAAAGAA  
AATGTAAAGGAAAAGCCGGACATATGCATATTTTCTGTCTATTAGTGGTG  
ACACATTGTGATGAAAAGGGTCTAAGTATTGAAGGTATATCATTAGCAGA  
GAAAATACACACATCTTTTTCTTTGCTTTCCCCTCATGACACCACTGAGA  
TTTCAGCCCAAACAGCACTGCCATCTGATGAGCGCTCAGGTGTTGTGACT  
GGAGCGATAGGCACTGTGACAAGGGCATTGTGAAAGAGTATGCAATGATTT  
GAAACAAAAAACAACAAAAAGAAAAAAGAAAGAAAGAAAGAAAGAAAG  
AAAGAAAGAAAGAAAGAAAGAAAGAAAGAAAGAAAGAAAGAAAGAAAG  
AAAGAGAAAGAAAGAAAGAAAGAAAGAAAGAAAGAAAGAAAGAAAGAAAG  
GAAGGAAGAAAGAAAGAAAGAAAGAAAGAAAGAAAGAAAGAAAGAAAG  
AAAGAAAGAAAGAAAGAAAGAAAGAAAGAAAGAAAGAAAGAAAGAAAG  
ATTAGGAGTGTATATAGCTGTGTGTTTCTCTAAACTATAAATCTCCCAGG  
TTTCTATAGAGGATCAACAAAAGCCTAAGAATAAAGTGAATTTGCTCATT  
GCCTACTGTTTGGTTGAGTGAAAATATAGAATATAAAATTATTCTTTGGA  
ACAAGCAATAGGAGAGGTTTAAACACAGTACAGTAATGTTACATAGTACTG  
ACGTAGTATGGATTTAATACAGCATGCATTGTTAGTGAGTGAGTGTAAT  
ACAGCCATGTGTGTTTATGTGCATCCATCTATCTATATCCATACAAACAT  
AAATGTCTACACAGTCATTTCTTTATAAATGAGAAAAAGGAATTAATAAT  
AATGAAATTGTATTTTATTCTTTGCTTTGTGACAGCCAGTTTGCTCAGAG  
TAAACTCATAGCCAAATTCTCCCAAGAAAGTCTAATCGAAACAAACAA  
AAGAAAACAAAAACAAATCAAAGATTGGTTAGTTGTCACTTTTATTGGA  
TAATGAATATAATATGATTAAAGTTAGCTATTTAAAAGGAAATTATGGCT  
ACAATACATTTTATTATGTCCAAAAGAAATTTATAAGATGATATATGGA  
CTCATTTGATAGAATCTAAACCCATTCCCTTATCTTTAAAAAATGTGTAA  
AATTAGAAATAAGATATTTCCCTTTACATGATAAAGAACATCTTTCTCAA  
ATTAAGAGGTCAAAAACAATAGAAGCATTATACAAAAATCAACCAGTAC  
ATTTGGAGACAAATATTACTACTATTTTTTAAAAATATTACTACTATTATT  
AAAAATCTTTGACACACAAAGATTTAAAAATGGCTCATAACAGGTGAAAAG  
TTGTTTAAATCTCTTTCATAATTTATGAAATGCACATTTTAAAAAACCA  
CTGAGATATCATTTCTTGCCATCAAGTTTGTGGAAAAATGGAACAATTTCT  
TTTAGAAAAGATGAGGGAAAAATAACCACTCTTATACATTGATAGCAGATA

CACAACTTGCCAGAGGGAAATTCAGCAATACCTTTCAATACGACCCATA  
CTCTTATTTTTTTGATGCAGCAATCTCACTTCTAGGAATTTGTCTTGCCTT  
CAACAATACAAAAAGACACACGCATAAAAGGATTCATGCATCACCATTTG  
TGA CTGCAAAATAGTGGAACAACTGAATATATTTAAGAAAATGGTTAA  
GTCAACCATGGTACATTCACACAGCGGAGTACTATGCAACTGTACAAAAG  
AATAAGGAAGACCTAAGATGGACTGATTTCCAGGAAATGTGGTTAACTGA  
AAAAGAAATGAATAAAATTTTCTATAGCCCTTTCATAAAAAGAAAGAAGG  
GGCTATAAGAAAATGCATATGTATCTTCTCATTTGACAAAAAGGAATACA  
GAAGAATCAGCTAGTCACTAATGATACTGGTCACCTTACAAAGGGTGGGTA  
CAAACATGGTGGAGCTAGTGGGGCTGGGAAGAGGTCACCTGGAGATGCCA  
AAGGAGCCATGTTTTCTCTGAGCAAGCTTTTTTCTTGCATATACATACACA  
AGAAATCAACAAATCAAGTCAACCAGGCTTTTGGGAAAAATCCCCAAATG  
GAACACAAAGAGCCTACAAATGAACCTAACTACTACTAATGAGAAGCATA  
ACCAAATGGAAGGAAGTGGAGAAGAAAAGAATGAATGTAAAGTAACTTGG  
GCAAAAAAAAAAAAAATGACCAAGTACTTGTGCTGTCAACCTAAAGACAA  
ATATATATATATATAAATAGTGTCTCCAGCTAGGAAACAGGTCAGCAAC  
ACTAAAGCCATGTGCTTCGTGTGCTGCAGGATTGAGAATGTAAGTACATA  
TACTGTGGAAGCAAGAGCCAGCCTTCACACTGCTGAAGACAGGAGTTCCA  
GGTAAAGAAAATGTGAAAGCTAGAACGAGCTTTGTGGGGTTGGACTGGG  
ATCAGAGGTGTATGAACTCACTGGTTTAAAAATACAGGCAGACGGAGAAG  
TATGTATGCACATGTGCATAGTTCTTAGCTCTGCCCCACCAAGCGGCCCTT  
GAAGCAATTATACTCAGCAGCAGTGAGCACACCAAGGTCCCGATCGTGGT  
TTTGAAATATCATTTTCAAGTAAAATGAACCGAGGGGCTGGGAGGATGA  
TGCTGGGGCAGGGGAAGCACAAAGTGAATCTGGGACAAGACTGTTGCACC  
CAAAAGGAAGGAAGTGTAAAGAGAACATCGCCAGCATGTCAAAGTACACA  
GGAGGCAACTGGAAGTAGCTCCCAAGGGTCAGATCCAGGACAATTTGAAC  
AACGAAAGAGACAGGCATAGCGGAGGATTATGCAATAAATGTCACGGAGT  
CCAGACGAATATATGTAATTGAACATATAAATAAATGAGGGAAGAGAAAA  
AGCTCTTGCCCAATGTAGAGTTTCAATTAAGAACATCATAATGTGGCATT  
TTATTGCTTCTGGTATATACTTTCTTGAGAATCAGTTTAAAGTAGTAGAG  
ATATGGGGTGAGAATGTCTTTATAAGTTTTTCTACATCCTATGAGAATA  
GAGAACACCTTCCAAGTGGCGTGTGTATGGACATATACCAACATATAAAA  
TAACATTTTTTCATGTATATATGTAAAAAATTTACCTAAGTATAATTATCC  
ATATATATTTATGTGCAGATACAAAGTTTTACAAATATAGAACAAAATTA  
TATATAGTTATATATGTAATCAATACGTGTTATGTATGTGTGTGTATG  
TAGTTTTTTTTGTTTTGTTTGGGATCTCAATAAATGTAAATCTTACAGTCT  
TAGGAAGCTTATTTCAAGGCTAACTTTATTTGCATTTTATATTACACCT  
CCAGATATTTATTAAGTGCAAGAAGAAAATTGAAGCAGTGTGCTTTCT  
TGGCAAGTCGAAGTGAGGTAAGGAAACATCTGTAGTCTTTAGCCCTTGCT  
GAAGCCCATGATATAATTTATTTGCAAATTAGTCTATACAATTACGACTC  
TTTGCTCTTCAGACTTTCTACTCTGGATTGAACCTGCTCATTGTTTTGAT  
GAAGTAACCTCCTCCGTTTTGTCTTAAAAACAAATAACAGGAACAGAAAC  
ATCTACCCTCACCTCTGCTTTCTGTCTGTTACGTAGTGATGGGCATGCTC  
TACCCTGCAATCAAATGCAATCCAGTGCTCAGCAACATTTTCTATATGC  
TTCTGAGGTCCGTAGGAACATTATTTGATCCAGAAATTATCTCACTAACC  
TGGAGGCCAGTGGATTTTCACTGGGTAGGACTTCAGCACAGAGAATCCA  
CATGCTGTTTTTGATACTCATTAATCATCTAGCTAATTTGTTTTAACATA  
GGAGTGCTGACAGCAGACGAATGTTATTATAGCAACGGTGACTGCATAAT  
CCAGACTATTATGGCATTAACATTTACGAAGCTGGCAGTTCCATGTTTCCAG  
ATATGGTCATTGTTGTCTTTCTGTCTGATTGCAATTATATCTATATTTAA  
TTCACATCTGCTATAATCAGGGTGGACTAGATAGGGCCAGCGGGATAA  
ATGGATTGCAACTTTTTTTTTTCATATTTTGATCATTATGCCAATAAATAT  
ATTGGAAGCCTGGGGTTTTATGAATCTGACAAGTATATGGATTTTAATATT  
CTGCAGTTTAAAATGAAAGTAAAGTTTACTGTGCAATATACCACGTATTT  
GCAGTATGACTTTAATGTCTTGTCATCACAAGTAGTGAAATTAACCAAT  
TTGGGGAACCTTTGTCTCTACCTTATAAAGACGAGAGAAGTAAACAGTG  
TTATATATTGTCCTATTTTGAATTCTAGAAACATGTACATGTTCTCAC  
ATGGATATTTAATGGCCTACACATATTTTAACTTTTCAAGCTATGTTTCT

CTTTGCTATTTTCTATTACTCTCACTTATTTCTGAACGAGATCATTTTTTC  
CTATGCTGTTAAAAATAACGCCTAAACAGGTTGTATCTTATCTAAGGTCT  
TTCAACTTGCTAATGGTTGAACTGGACTCTAGCTAATGTTCCCTAATTTTC  
CAGATTTCGGGGACTCTCCATTAACATAACAACCTTGTCTTTGCTCCAGAT  
ACACCATGGCTTCTCAGTTTTTAATAAAATTAAAAGCTGAGCCTGGTACCC  
GAAACTCAAGAGATGTCAAGACCCCTTCTTCCTTCTTTCAAACGTGTGCC  
ATGAACACCTTCTTCTCTCATCCTCTTGTTTCATGGCATTTCAAAAAATA  
CCCCTAGGGTAGATGGCACTCCAGTTTTTTGAGCTGTAATTTTCTAAGTCA  
CGATCAAGAAGTATTTAGCAATGTATTTCTTGATGCACCTTATTCTCTGA  
GAGAAATATATTAGATGCCTTTAATGGATTGAGAGATATTAAATGCAAGG  
GAGAAACCAAGATGTTTGAAAGGACTTCTGTTCACTGCACCAAACCTGCAA  
CTTTTACCCAGTAGGATAATAGAGGAAATAAATGGTTCTTTCCCTGACAT  
GTTTACATTGTTATCTAGAGTCTTTCAAACAGTAGCAGAGCTGTGGTTCT  
CTTGATTTGCTCACTCATTCTATTATTAGAGAAATTCTTAACCTCTTCCA  
AGGGGAGCCATTTTTCTGTCTTCACTCTTTTTCTAGGGCCCATTTCCAGT  
TCATCAGGATACTGTCAAGGACGTTGAAAGTGTGTCCATGCTTCCTCCTCC  
CCATATGTGGTAGAGCTGGCTCAGTTATCTCTCCCATGTAGTGAGCTCAT  
GGGCTTTACGCATGACAAAAGGCAATTTGACACTTACGTCATTTTGTGTTG  
TGACTTGCTAGCCAACCAATGTTGATAGTATTAATAATGAACCCTGTCT  
GTCTAAAAAAGAAATGCAACCCTGTCTGTCTAAAAAAGAAATGCAACACT  
GTCTAAAAATGAAATGCAACATGGCATTGAGGAAAAATTTTTTCAGTCAGC  
AAAGTACCTCTTTTACTTACAATGTAGAAGAAGATAACGTTGATCAAGTA  
GTAAATTATTTAAGAAAAATGGATTTTTTAGATTTTCAGTTGTAACCTAGA  
CAGTGATAAGTAAAGAGCACATAAATACATCTTATAAATTTACAAATTTT  
GATGATCACATATCTTATAAATTTACTAATTTTGAAGGAACTTTTCATG  
AAATTAAGTCATTTAATTAAGGAGATATTACAACATTGAACTCTGAGCTG  
CATCTTTTAAGGCAAGTAGAAGGAATACCATTGTATATAAAGGGATATTG  
AAGGTCTAGAACCAATAACTTGCTTAAGATATATTATTTCAAACCTAAA  
TGCAAATATTAAGTCCTTGTATATATCTTTTATACAAACATGTTATTTAT  
TTCAATTCAGTGTTTTTATCTGGAATTCAGGTCCTTTTGGTTTACTTATT  
TTGTATTATTAATGTTCCACCGAACTTTTAATGACTATAAATGCAAAATAT  
TACATACATCTGTAAATAAAGTTAAGAATTTTCTTAGGGATGAAGTAAAA  
ATAAAACCATAGTTTCATAAAAAAGTTCATTTGAGTTTCTATCCATTCTAA  
CATCAGAATAAGACTACTCCTGTTTTATAAAGTTAAAAGGGCTCTTTGGA  
TGTGATCTTTTTTTTTCTTTGCTAAGACATAACCTAAGTTTTACTTTTCCTG  
TTACGTGAGGCAGAGTGGGTACCAGATAAATTTGATAATAATTATTAGATA  
GAGAAAAATAATTATTTTAAGGCATATTTTGGGAAGTTGCAATTAGCATCTT  
ATCTTGGAATTTGAGTATTATTATTATTTAATTTACAATGTAAACATGTA  
ATTCAGTACATTTATATAATTCGTTGAAGCAAATTAATCTTAGGAAAATA  
AACAGAATACATGCTTTTGTCTGGAACCAGACGAGAGCATCCTCAGGGCA  
AGTTCCTGATTCCCTTACTCCCTTCTTTACCTCAAGCTGTGAGAAGGGGG  
CTGTCTTGAGACTTAGAGTGTTTCATCCTTCCAAAAGAAGCATAAATCGAG  
GGCAAAAGGATAGGTCCTTATTTTAAGATGCGAAGACGAGGTGGTTTGAA  
AATAGTGCTGCAGTGGAACATTTGATGTGAGTAGCAAAGCAGAAGTCAA  
GAAGACGGAAGCCAAGAGAAGGGATTTTTGAATGCCAGACTTTTTTCGGTG  
TGTGCATCTGATTAGGAAAACTGAATTATTTCTATACATTGAAAAGAGTG  
TTTTTCTGATGAAATTTACTTTCATTATCTTATGAGTCCATCTGAATTTT  
GTTCAACATAAATTAGAATATCCTACTAATATTTTAGAATTTATTAATCAG  
AAAGTATATATATATACACACAACCTGTTTTTTGAAATTTATTGGCAATG  
TTTAACATGATAATATTACAGATTACAAAAAAGTAACTGTGTTTTGAAA  
TTATTAGTAATGTTTAACATGATAATATTTCAGATTTCACTCCTGCTGAAT  
CACAATGAGCTTCCAATTTGCCCTTAAATCTTGTAAGAATAACAACATA  
GGAGAGAAAATCACTACCAAGTATAAAAAACCTAAAAGTGAGGGACACCT  
GAGGGTCTTAGTGGTTGAGTATCTGCGTTTGACTCAGGTCGTGATCCTGG  
GGTCTGGGATCGAGTCTGCATTTGGGAGTCCCTGTAGGGAGCCTGCCTC  
TCCCTCTGCCTATGTCTCTGCTGTCTGTGTCTCTCATAAATAAATAA  
ATGAAATCTTTAAAAAAGAACTAAACTAAAAATGGATTAATCTTCCTTG  
AAAACCATCCACTGGTTTCTTGTCTCAGTTAAGATATAAGAAAGCTAAG

GCAAAAAATAAGTCAAATGACATATCTCAGTTCCAAATAGCAAGTGTC  
AGACTTTTATGAAATGTCATAGCTAATGACTCAGTCCTCAACATTCTTGC  
AATGATTTTGTATTTAATAAGGATAAGGACTAGAGCAGAATATATATACCC  
TAACCCAGGTCTTAAAAACCTACCAAATCATTACTTGCCCTTCCGATTG  
CATTTTCTAAGCTAACTAACTGGTTATTTAGGTATAAGGGTCTTTGTAA  
GAGCCTAAGTTTATTGTATTTCTATCTCCAAAAGAGTAAAGCCAATACT  
TTTTCAATCACATTTTTTAAATTTAAACTTTATTTTAAATTATATCAACAT  
AATTTAATAGTATATGTGATTTCTAGATGGTTTTCCCCAAAGTTACATCA  
TTTTTTACGAAAGAAGTGTAGATTTCTACTGCTCCTAGATCTAAATAAAA  
TTAAATAAATAAAGTAGCATGATAAAATATTTTATTTCAAATCTACCTTC  
TCCATATTATTCATAGTTTATATCTTTTTTAAATTATTTAATTTCTATTT  
GTAATGTCAGATTTTATATCTAATAAGGCAGCATAAAAGGCATACCAACT  
ATACTTATCATGTGGTATATGTAAATTTATATGCATTTTAAAGATCATAA  
TGTATTACTTGAAACTGCAATAATAAAGAGAAGGCCCAAAAAGATTTCT  
GAATTTTGGCAGAGGAATTTTGCAGATTATTTAGATTTGGCCATTTGATA  
GAACAAGAACCACCTTAGTACATAACCCACATAAACATTACAGTTAGTGC  
AATTCAAGCGTAGGTGAACTTAGGGACATAATTTATTTTGGAAATATGA  
TAATTTGTGGGGTTTTTTTTTGTAAATGTAAATGTTGGCTGTCTGTCTTA  
AATTTATGATATACATAAGTCAGAAGAATCAGCTTAGAGATGACTTGTCT  
CTATTTCCATTGTCTTTTTTTCTATGACTTATGTAATTAATAATTGAGAA  
AAAAGAAAGAAACAAAGAAAGAAAGACAAAGAAAAAGCTGACCTGAAATGA  
TATTCAAGGTCAAGTTTTTGACAGCATTTAATGACCTCTAACACATTAATA  
ATTAAGTTAAATTTTTTAAACAATGGTCATTGGAGAATGATAGTTCCAGTC  
AAATGAAGGAAATAGGGAGGTTTTTTTGTAAATTTATTTAAAGCTGGTCTG  
AAAAGAGAGAGAGAGACTGATTCAGAGAAATCTCCCATGAGAACATGGTC  
TCATGGCATTTCTAACCTGATTTCCAGGCCAGAGAAATCTGTATGGATAT  
TCAAACCTTTGAATGGTTATGCACATCAAACCTTATGAACCTTTGGAGAGTC  
ATCCTTCATTAGGCTTGACTTCAGTGGGAATAAGCAGCAAGAACAGATG  
GGCTACTAAGGCAAAGGTCTCCATGCTAATCATATCAAGAAAGACCAAAC  
CAAGGAAAAGATACACATAGTGCATTTCATGATTGTTTCAGCCCTCCAAAT  
GAGAAGGTTTCTCTAAGGTTTATTGCAGATATCAACCAATTTTTTAAAAA  
AATAGTTAGAATTTTTTTTTTATAATTTGCACATGAAGTGAATACAGTTC  
CTAGGTAAAGAGCAAAGCACATGGTCCATAGCAATGATGTAAACTCAAAG  
GGTCAATTTGGAGGATCCCTATTATGAATATGATTTTTTTTTTTTACATGG  
GGTCAGAATTTAAGGACATTAAAGTTCAAGCTCACTTAGGAGGAGAGTTA  
AAATGAAAACCACAGGAAAGATTCCCCAAAAGCACAAAGTGTAAAGATTCTG  
GGTGATAAAAACCTTAAGGCCTATGTGCAAGCATAAGCTACCAGCTCTGTT  
ACCAAGTTTATGAGCCAGGAAGCAAATGCAGCAGAAAGTATCTCTCCATGA  
GTAGTTTATGGGAGACATAATGAGAATAGGCACATCTTTTTTTTTTTTTT  
TCATTTCCACCTAGTATTTTTCTTAGCAAGTGTTGTAAGAAATGCTAATT  
CATCAATAGATAATTCTGTCCATAAGTGAACAAATAAAAGGTAAGAGAAA  
AAATCACAAAAGAGTCAATAGATTAAATAAATAATCTTGTGGTAAAAATA  
GATTAATCTACAGTCTTTCATCTTCCAAAAGTTGAGCTGGGTAGATCC  
TAAAAGACCTAAAATCTTCACTTATTGATTGTAAACTAGTTCAACAAAT  
GCTCTATTTTGACAGTGCATTCTTTTCTTCTGTGTTTTACAAATTAGTAA  
TTTGACAAACGATATTGTATTTTATTTGAAGGAAAAAATAATATTTTTTC  
AGACTTTTCCTCCTACCTCACATTTCCCTCTAAAGGAAAGAGAAAAAATAT  
ATGAATCTTGAAACAGTATTGATGTGGCTTTCTTTTCCCATTTTTATTCA  
TTCTCTTTCTACCTTTCCCTCCCTCTCTCCCCTTTTCTTTCTTACATTCA  
TGGAACCCATGGGCCAAGCATTTGGATCCTCTTCCATTCTCACTGAATGGA  
AGTTCTTGAACACCAAAGTGTTGAGTCCAAAGGCAAGGAATCAAACCTTG  
GTTGGACTGTATGCTGAAAAGACAAGGATAGAAAGTGCCCTGTTATCAGG  
ATGAGCCTGGGAGTCAGTTCTGATTTCAGACCCCTCATGGTCCCCTAGCA  
CATAGGTCAATTACCTCTTGAAGAGACACCGAGAAGTCAAGTCTTCCTGC  
CTGGAAGTTGCAAGAGGAAAGACAGATTTGCCAAGATCCTGTCTGTTACT  
GCCTGATGTGGAGTTTTATGAACAGTGGAAGGAAAAAGGAAATATCTTC  
TTAATTTGGTCTCTATTAGCTCTTTCCATCCTCTCACTGGTGTTGAATAA  
GTTTTTTTTTCTTAAAAAAATAATAACATTTTTTGTAGTATAGAAATTTAT

GCCAGTCTGGTTAAGAACAATCTTTGTGTCGCTGGTCTGACTGAGTTATA  
ATATACCACCGAGTGTAAGTACCATTTTGTGCTAAGGAAACATGTG  
AAGTTGCTATTTAAACCTGTTCTATGTCTTCACATTAAGCTCTGTTGAA  
TGCATTATATTACCACGTTGAAAAACCCAGTTTGTAAACATAATTTTCAT  
TTAAACCATTAAATGGAAGGTTTGCAGCTCATGTTGGCAAACTGGAGC  
CTCCAATAATGAACAAAAGGCAGCCCCAACTTTGAATGGAGCTAACTG  
GGCATAACAGACATCTCCAAGCAGGCATCTTTGTTACATTTTGTCAATTT  
TAGGTATGGCTGCTGTGCACATAAATGTGATGTTTCATGTTGGTCAGTTC  
CTGTCTATTGAGGAAACACAGTTCATTTTCCAATGCTTGCTTTATCATC  
AGGGCTGAGCACATGGTATCTTAAATCGTGGCATGAAATCGAGCCCCTGC  
TAAGAGGGCTCGCTATGGATCAGCTTGGCTGCCACCCTCCTGCCGTTGG  
CATCATTTTTTCAGTGGCCAATGTGCCAATTAGATTTTTTACCTCAGGTAAC  
TCTTCAAAAAGAAATGCCTAATCATTTTTAATAGGATGGGCGACATCTTAGA  
GGGAAAAAATAACAAAATTTAAAGTTGATTTTTAACCTGCAATGAAAAACAA  
GCCATGGGGTGTTTTCCATGTGAAATCTTGGATGTCATACAATGGATGGAG  
GGCAAAACAACCAAAACAGGGAAAGGGGAGGAGGGAAGAAGGAAAGTTTG  
CTTGAGTCATTTTCGGCCAAGGTCTGCTTCTAACTAAAGTTCATGGAATG  
GGTTTAGAATTTCAAAATGCTGCTGACAATTAGCTACACTTGGTGTGAGG  
CACTCGAGAAGAAAAGCCTTAGAAAGAATCCTTCCTTTTTATACCTTAGC  
CTATCTCAAAGGTCAAGTAATCATGTTGACAATGTTTGAAAAAATGTCA  
CTTCCTATTTGGGGTTTTTTTTCTGTCTTAATAAATAAGTCATTTACTCCA  
TGGCAAGGAGCCTGAAGAGAGAGACAGAACACTAGTGTTCAGGTCTACAA  
TTTTGTTTTAGTGGTTCGTTTTTAAAAAATAACATTTCTTCTAAAATAAAGA  
CATAGACACAAAGATTGAGAGCGGGAAGAAAAGGGAGAAAAGAGAAAGAGA  
GAGAGAAAGGTTACTATTCTAGAACCTGATCAGTGATAGAATGGGAGATA  
GAAGAGATTTCTTTTTACTTTCCACCCCTTTATACAGCTCCACATTAGGC  
AGTAACAGACATAATTCTCATTTGATTCCTTGCTTTTGGACATTCAGGA  
CTTCCATTAAAGTGCAAAGGGAATAGGATCCAATGGCTGGCCCATGGGTTC  
TATGAATGTAAGAAGAGAAACAGAAACATCTTCCAGAAGCAGCTTTCTA  
TAGCCACAGACTCTCTATCTCAATTTAAAGATATTTTTACACCAGTACAG  
CCCATTAAATTAATTAATCTTTCAGTTCCAAAAGTTTAGAAGGCCTATTG  
CTCTTCAGTGCTACATGCTTCTCAATGTTAGAAATGTCTTCCTTCAGTCT  
GTTCCAAATTTTTTTTTCTGCAAACCTAAGTGTGTGTGTGTGTGCATGCACA  
TGATTATATCTTGGGGAGCCTATCTGTTTTAGTCTTTCAAGTATTTAGTC  
CATCTCTTACTGATTATATCACATTAGGCAAATGACTTGACACCTCCCCT  
CTGAACCTTATTTAGTTTTCTCATCAATAAAATCAGGATATTCCTGATGA  
GAAGTATAAAAGTGATATAAAACACCCAGCAGAGAATTTGGCACGAGTT  
GGCCACAATAACAAAATAATTTATTTATTTTTTTTATTGAAAATAAGGTT  
CATAACAAAATGTCAATACTTCCAATAATCACTTTTATCCTATTGGAAA  
GTTCTGTGTTGGGAATCTAGGTGAGTGGTTTTTATCACCATCATATTTGT  
TGTCAAACCTTTTTGTCTAGTTTTATCACTCCTGTACTTGAACCTAATCAT  
TAAGTGCCCCCAAATGATGTCTTAAGCATATAGCCTCCTAAATCTAGT  
AGGTGTGTTTTCAAACCTGATGAGGAGATTCAAAGTCCATTTGTTCTATGT  
ATTTAGTGCCCCCTCAGACTCCCGGAAGAGTGTTGACCAGGCAGTGAGACA  
AATGTGTCGTGTGAAATTTGCCAGACAGACATTGGTCATATCGGTGAAAT  
ATGGCTCTGAGCCAAGTCCAAGGGAATTCTTTAGTTTTCACTGTGCACTG  
GACCAGGATAAGTATGTTTCAGTGTGATGGTAGCACACATTGAGAGAAGCC  
TCCACCCGAAGACAAAGAACTTGGTTGAGGGTTTTCTGGCCTCTACAGTG  
AAGATTTTTTGCCTCAGCTATGAAACATGTTCTTCTTTAAACAAGCTCTT  
TAATTTAATATCTTGTCAACACATTTTCATTTCTGATATTTTCCAAAACAA  
TTTTATCCCAAATGTCCATACACCGATGAGTGGAAAAGCCCAACATGATA  
TTATGGTGCAATACTATTTGTCAATCAAAAAAGGCATGGGGCAACTGAG  
TGGCTTTGGCTAAGGTGATGATCTCAGGGTCTTGGGATCGAGTACTGCAT  
CAGGCTCTGCTTCTCTGTCTCCCTGTGCTCCTCCCCTGCTCATGTTATCT  
CTCTTTCTCTCTCTCAAATAAAATAAAATATTTTTTAAAGGGCATAGAAT  
ACTAACCAATACAACATAGATGAGCATCAAAATCTTTATGCTAAATGAAA  
GAAGTCAGACACAAGACTGTATAGTGTGAGATTCCATTTCTATGAAATAT  
CTTGAACATGTGAATCTAGATAGAAAGTAGAAAGTAGGGATCCCTGGGTG

GCGCAGTGGTATGGCGCCTGCCTTGGCCCAGGGCGCGATCCTGGAGACCT  
GGGATCGAATCCACATTGGGCTCCCGGTGCATGGAGCCTGCTTCTCCCT  
CTGCCTGTGTCTCTGCCTCTGTGTGTGTGTGTGTGACTATCATAAATA  
AATAAAAAATTTTAAAAAATTTTAAAAAAGAAAGTAGAAAGTAGATAGAAA  
GTAGATTTCATGAGCTCCTGGGACTGGTTCTGGGGAGTGAAGTGTCAATGGG  
CATCAGAGATCTCACGCTGGTGGTGGAAATATCCGAATGTTGGACGGTAG  
TGATGCTTCCACAACCTTGGCAAGTCAACTAAAAACTATTGAACCGTATAC  
TTCAAATGAGTGAATTGTGCAATATGCAAATTACATCTCCAGAAAGCTTT  
TAAACAGCAACTATAAAGATTTTACATTTTATTCATTTTCTCTAGGTTAA  
TACTGATGGGAGAAAATAACCCCTTGTTTACTACTATCATCTGAGACATT  
TTTTTTGCTACAGCAAAGCCAGGTCACCTTTAAAGGAGAGCGCTGCATTA  
TCCCACAATGCCAGACTCCACCTGATAGTGTTGGAGCAGGTGGTGAACAT  
GTGCAGAAGACAGGGCCACAGTGCTAAAAGCATTGATTTGGGGACTTCTG  
TGCAAATGGTCTTTTATTCCTTCCTATACTTAACTGCCTGTCTAAAATGTT  
GACCCTACTAAAAAAGCCATAGGGGCGAGTCACGGAGAATTACTTATTTA  
TTTGTGTTTCATAGGACCCCTTCTGTCTAGATGTTTTACAGATTAAAGAAAGG  
AAGAGAAAGTTCTGCACGAAGGAACACAAAACGAAGGCCAAGTTTTCTTT  
CTGTCAATTACTCTACGACCCCTACCCCTCCTCCTTCCCTTTTTTCCCTC  
AGCTCCATATTGCTACTTTGACAAATGACAATGCAAGAGAATTTATGTTG  
GGTCTTGGAGATTAGCACATTATCACAAGCAAAACAGAGCCCTCCGCTTC  
TGCCGCTGGGGAGCGATTGAGAAAGGCTTTGAACGTGATGCATGGGTCAA  
GACCCATTTCTGAAGAAGCAAGGATGCTGTTATGCTGGGACAGGTCTGGA  
TAAAAGCCCTTGGAGAGCCAGGTGAAGACACTCTGGGCTGGATGAGGAGC  
ATTTAGCCAGAAAGCTCATTCTGGGAAGGAAAGAGGAACCGGGTAGCTCC  
CCGAAGACCTCTGTGTTGAATGATTTAAGGCTACCTGTAGGAAATGCCTT  
TTGCTTTATTGCTTTTTTAGTCTCCCTGCTTTTCAGGGGGGAGAAATGAAG  
AAACACAACACAGACCTTCCCTTCCCTCGGCTCCTGTCAGTATTTCCCCAG  
GACGTTTTGGTGGGAACTCAGTCCCATCATAGTTTCTATAAGATTCTTCC  
ACAATAACAAGCCAGTCTGCAGGTGGGATCCCAGATTAAACCACGGCAGG  
CAACAGAGGGTTTTAGTTTTTGAAACATGTTCAATTATATGCACACTTAT  
TTTAAAAGCTTGCAGTGCTGGGGCACCTGGGTGGCTCAGTGGTTGAACGT  
CTGCCTTCAGCTCAAGGTGTGATTCCAGGGTCTGGGATTGAGTCCCACC  
CACATCAGGCTCCCTGCATGGAGCCTGCTACTCCCTCTGCCTATGTCTCT  
GCCTCTCTCTATGTGTCTCTCGTAAATGAATAAAATCTTAGAAGGTAAAA  
AAAAAAAAAAAAAAAAAGGTTTGCATGCTTAGTTTACATTACTGGGCTT  
CAGCATTTGAAATGTAAGGCACAAAGCAACTTCAGGGGAAAAAAAAACTCA  
AACATCAAATTTTGGATTGAAATAGAATTGGGGAATACACAATATTAACC  
CAGTCCCTAAATTATAGAAAAAAATGGACAAAATAATCTTGAGAAAGTAT  
TCAAAAAGAAAAGCTACTTCTGAAAGTCACAAATAGCTGGGCATGATTATA  
TACCTAGCTGGTAACTTGATAACCACAATATGTCTGAATGAAATCTAAG  
TGACAATGAAAAACACTGGATGAGGCCATCATAATACAACCTTCCCGGAGA  
CTGTTTATTGGTATCTGGGAACTCATGTTATAGAGCAGAGTTTCTTAAC  
CTAAAAGCAATTTACTTTTTGGGTCCAATCATTCTTTGCTATGCAGAATA  
TCTTGTTTGCTTAAAAATGCCTAGTGGTGGGGCGCCTGGGTGGTTCAGAT  
GATTGAGTGTCTGACTCATGGTTTTGGGTGAGTGCATGATCTCTCGGTCA  
TGGGATTGAGCCCCACGTAGGACTCTGCGCTCAGTGTGGAGTCTGCTCCA  
GATTCTCTCTTCCCTCCTGCTTACTCTCTCTCTCTCAAAAAACAAAACAA  
GACAAAAAAGAAAGAAAGAAAGAAAGAAAGAAAGAAAGAAAGAAAGAA  
GAAAGAAAGAAAGAAAGAAAGAAAGAAAGAAAGAAAGAAAGAAAGAAAG  
GAGCATGCCTAGTGTAAATCCTTGCCGATACCCACTAGATAGTAGCATTC  
TCCCCAACCAAGAAATGTTGTGACACATTGTTAAATGTCCACAAGAGTGG  
GGAGCAAAATCAAGCCTGGTTGGGAAACACTGATTTAGACCAGATAGTTG  
TACACTTCAGTTTTTGACAAAGCCTTTGTCTGGTGTGTCAGTCTTCCAGT  
AAAAGTAAGATGAAGATACTTGTGGGTTGTGATGCCTTTCTGTAGAAATA  
ATTGGCTTAGAAATAAAGCCTATGTATTTCTTTTCCAGCCAAAATTTATGTA  
GCTACTGGACGTTGGATGCTATACGTATGCTTCTCAGGGCTTGACATCCA  
TTCATCACTGTTAGCTCTTCTAGACTCGCATGTCTTGGGTAGATGTTTAC  
ACAATAGTAAGAACTGTAATAGCTACTGAACACTTCAGATGTGCTAATTA

TTTAGCTGAGGTCTCTACCTATAGTATGATTTGTCATCTCACAAAATTCA  
CTTGATGGCTGTAACCATTACCATACCTATTTTATAGACGAGGCTTAAAT  
AAACTTGCCAAAGTCATTCAGTGATGGATGAATCTAGGATCACCCAATTT  
AAAGAAGGCGTTATTAAGAAAGCTGATGCTAAAGGCTATGAATGCACACG  
TTTCCATAGTTCCTTTTTTAACTTATTGGAAAATCTCCAGGAATGACGGG  
GCATGTGTTCTTTTTTTCCTAGCCTAGAGAGGGGAAAATGCTCCCAATTAC  
TTCAGGTAAAATCCCAGCTACTCTCTTGTAATGTCTAATCCTGCAGACAT  
CAGAGTGATTCTATTACTCAAAAGATCCCGAATGTCACCACATTTCTGAC  
ATTTTCACATATTCTCCGCTAATTTTTCATTTTCTCTTATAGCTCTGTAGC  
TACTTAGACAAAAGCAGAGGTACATTACCAGTGTAATATCACCCCTCAA  
AGGGTTCATTTGGTCTGGAATCATTTTTGATTGTCATCAAATGTGCTAC  
CTGAATTTAGTAGGTAGACACCAAGGGTTCTTTTAAACATCTTGCAATAC  
ACATGAAGCCTCCCCTGCAAAAAGTTATCTAGCCCAAAGTGTCAACACT  
GCTAAGGTGGAATGAGAAAATCTTGGACCAAAGGAATGTAATCAGCTTTAA  
ATGGTAAGCAAGATTTCCTTGCTGTAACCTCTTTGGGAAACATATATTCTC  
ATAAAATTAGTTGGGATATATCATTAATATCAGTTTTCTGGGGATGGTCAA  
TTAATAATACCACTCACCACTTCCTCATGGATTCTAAACGGATTGATGCA  
TAGATGGAAAGATCAAATAGAACTTCAAATATCAGTTAGAGTACCATCAA  
TATTGGATTGCAGAAATTATCCTAACCTGGATGCCAACATAAGTTTTCTA  
CATATTTCCCCATGAATTAACCTCACCTATGCACAATTAGAAAAGAGAAA  
TTAGAAAAGAGTGAAACTTCCCCAAAAGATCTGGGGTGGTTAATTTTCTG  
GGTCAACCTGACTACACCACCTGGTGCCCGAGCTGATTCATTGATTGATT  
GATTTTAAAGATTTTTATCTATTTATTCATGAGAGACACAGAGACAGAGA  
GATGCAGAGACACAGGCAGAGGGAGAAGCAGGCTCCATGCAGGGAGCCCA  
ATGTGGGACTCGATCCCGAGTCTCCAGGATCTCACCTTGGGCCGAAGGTG  
GCACTAAATCGCTGAGCCACCCAGGCTGCCCTGGTGCCCGAGATTTAACAT  
GATTTCTGGTTTGTCTGTTTCTGGATGAGATTAGCAATTGAATCTGTAAA  
ATCAATAAAGTAGATGGCCCTCCCCAATACTGGTGATATCGTCTAATCC  
ATCCTGGCCCCAAAAGAACAAGACACAGAGAAAGGGAAGATTTGTTCCCT  
AACTGCCTGCCTGCTTGAGCCAAGACATTGGTCTTCTTGGACTGGGACT  
TATACCATCAGCATCCTTGGTCCTCAGGTCTTTGGGCTTGGACTGGAATT  
ACACCATTGGTTTTCTCTGAGTGTTTCAGTTTGCAGACAGCAAATCATGGAA  
TTTCCAGCCTCCATAATCATGTGAGACAAACACTCATAATAAATCTCTT  
TATATATCTGTTGGTTCTATTTCTCTGGAGAACCCCGACTAATATAGGAC  
CCTGGGGTATTTAACACACAGAGTAAAAGAGAATGAATGTGGCCTGCAGG  
CTGAGAGAGAGTGATTCTGTATATGTAGTGATTTTATCATCAACTGGCTG  
ATCAGTGCAGTCCGCACTCAACCCAAGAGTGAGAAAAGGGGTACACAAGT  
CCAGTACATTTAAGATGGTGGAAGGTTTTTGTTCCTTTTTTTTTTAAGGA  
TCCTATTCAATTTATTTGAGGGAGAGAGAGACAGAGAGAGAGAGAGAAG  
AGCAGAGGGAGAGGGACAGAGCCTGACGGGGCGCTCAACCTCATGACCCT  
GAGATCACGACCTGAGCTGAAATCAAGAATCGGAGGCTAAATGGACTGAG  
CCACCCAGTTGCCCCAAAATGGCGGAATATTTTGTGTGTCAGGATCATGCA  
GAGACCAATGCAGAGAGAGAGGCTCTCCTTCAGCCCAAAGTCTTATTTG  
ATGGAATAGAAAAGCACTAAGGAAAGGATTATTTAAAGGTTGGAGATGAA  
GAGATCTATTAGAAGATGATTTAATGCTATAGGTGAAAAATGATGGGGT  
CTGAACTAAGGCAATAGAAGTGAATGGGAAGGAAAGAGTAACATATGAGAG  
TGATGTAGAAGATAATTCAGAAAGAAGAGTCTAGAAAGAATTATCAAGTT  
TTTTAGTTTCTAGATCTGGGGATCTACAAGATGACATAATTCGTTTAATA  
AACAGGTGCTCACTATGTGTCAAGAACCGTGGTGCACAATTTTCAAATG  
TTTACTCAGTTAATCCTCAGAGTGTAATAATGGAATAGGAATTATCACTA  
TTACCTCTTACATGTAAGAAAACATGGAGATCACATCACTTGTCCAATAT  
AACACTACTAGTAAATGGCAAATTCAAGATTTAAATCCAGATACAGAGGT  
CCAAAATATAGAGCCTTACTGCTAGTAACCCACAATTATATGAGAAAAGG  
GCAGATTTGTAGAAAATATAATACATTTTCTTGGACGTTACATTTTGT  
TTAGTCTTCTGTGGGATATTTAGTATTTCTCTCAGCAAATTCAAATAGTA  
GGTACATTTTAAAGAAAAGAGGAAAAGCTCCGTTGCCTCACCAGCTCTTGG  
TGACAATGCCTTAAGGAAAAAGGACAATGCAAAAAAAAAAATCGAAATTT  
TGGAAGTTGGCAGGGCAATGAGGATCGTATTTTGGGGAGGAAGTACCCT



TATTTTATATATATGTTATATATAATTTAATATATATAATAAATGAATAA  
GTAAATGTTTTATTTATCTCATGTATCTATGTTGATTCTTGAAGTTACAG  
CAGTGAATCTATGAGAAAAGGTTGTTTCCTAAGGTGTTTACATTCTAAGA  
AAGGGAGAAAGGCAATAAACCAGTAAGCAAACAGCTATACATGATCATTG  
CAGAGAACAGCAAGTGTTGAGAAAAATAAAATAGGATAGTGGGATTTAGA  
GAGATTGAAGATGATGTGTGAGGGAAAAGCAAAGGGTTAAGGTTGAAAAG  
AACAACTTTACAACAACCTTACAACATTCACGGAGGGTCTTCCTGAAAAG  
GTGGATATTTCTTCTAAGATATAACTAATGCAGATGGGTCAACCCAGTGA  
GAATTCAGAAAAGAGAGTTTCAGTAAGAGGAAACAGAAAGTATGTAGGT  
CTTGAGTCTAGAATGAGTTAAATGTACTTAAGAAATAGAAAGAAGACCAA  
TATAGGTAGAACATAATTTAAGAGGAAGAGTAGAATAAGTTGGAAGTAA  
AAGAAAATCAAGGTCCAAGTTCTAGAGGTCTTTTTGGGCCAGGAAAGGGA  
TTTGGGTTTTAGGCCAAGTGAAACAGAAGGCCACTGGAGAGATCTAAGTA  
GGGAGATAGGCTGTTGGGGTTCAAGAGTGGAAGAAACCAGACAGATTTTC  
AGGCTAGTCTCATCATCCAATGATATAAAACAGAGGTTGGGAATAAGGAA  
GAAGCAAGAAGCAAGAAGTGAGATGGGGCAAGTTCTTGGGTTTGGATGT  
GGGGAGAAAGAGGCAGAGAGGAAAGGAAACAATAAAGTTAGCTGCATGAAG  
GCCATGTCTCTTGTTCACACTGTACCCCTAACTGTTGGCATGTATTAG  
TACAGGTGCAATAAAAGTTCTCCACAATTACGGAAAGATAAGCTCTTTTC  
TACGTGCTTTCTATGGATTATCTGGTTTTAATTCTCACAACTTTCTGGGCT  
ACATCCTACCATTTTCCAGGTTTTATGTAGAAAGAACTCAAGTTAAATA  
GTTTAGTTAAGTAATTTCTCAAGGTTAAACAAGTGGGAAGTGGTGGTCC  
TGGAAACCAAACCAGGGTAGACTGATTTCTTCAGCACTCATGTTCTTATT  
TGCTATTTCTGGAATAAAGAATAAATGCAAGTCATTAACATCTTCCCCT  
GAAATGGTCTATATGTGGTTCTTATTAGTGGTATTCTTACTGCTTTAAT  
ATGTTTTAGCCTTGATTTCTGGTTTTATAGTAATAAGAGCCAGTATTTGT  
TGGATCCTTCCTACACACTCTACCAGGCATTTTACACTCACTGGATTAGT  
TTAATTCCTACACAAAAGCTATGAGATAGATACTGTTCTTATTCTATAGA  
TGAGAAATTAATGCGAAGAGTCTATCCCAATTTATTTAATTCCAAAGCC  
GATGATTTTAAACACAGAAGTTATTGGAAGAAGCAATGAGCATATAAAAGT  
GATCAACATCAGAGAAATCCAAGTTGAAACAGTATATATAAGGTTTTCTC  
TACATCTATAAGGATCACTAAATTTAAAAGATTGACAAAACCAAGGGTGG  
CAAGAATATGGAGAAATTGAAACCCTTGTGCAGTGCTTCTGGGGATTTAA  
AATGGCACACCTATTTTTGAAAATGTATCAGTTTCTAAAAATTAAATATA  
CACTTACTCTGTGATCCAGTAATTCACCCCTTAGGATTGTATGCAAGAGA  
GTTGCATGTACTTTGTGGCAGGCATTTTGATTCAAGGTGACATTTACTGAA  
TACTTATTAGGTACCAGGTAGGATGTGTATTAGTCAGGATTCTTCATAGA  
ATGAAGAATCTTCATAGAAACAAAACCAATAATATGTATAGGAAGATATT  
TACAATAAGGAATTAGCCATGTGATTATAGAGGCTGAGATTATTCAGACT  
CAGCAGAGCCAGTAGTTCTGTTTGAGACCAAAGGACTGAGAAGTAGATG  
TGCTGATAGTGTAAGTTCCAGTTCAAGTCAAGTCCAAAGGCAGATGAAGA  
CTGATGTCCTAGCTTAAAGTCAGTCAAGCAGAGAGAGAGAATTTTTATTCT  
TATTCAGGTCTTAATGGATTAGAAGAGGTCCACCCACAATGGAGAGAACA  
ATCTTCTCTACTAAGTTTTTAGATTTCAGATGTCAGTCTCAGCCAGAAACA  
CCTTTACTTTCACACCTAGAAATCATATTTAACCATAATCTAGGCACATA  
ATATTAATCATCACATATGATTCCTTTTATACATCATGAGGAACCCTCAC  
TAGGATGATCATATATCCCAATGTGTCTGTACCTATTGCCCTGACATTAC  
TACTAATAGCATACCTTCTCACCTTCAAAGAGTCCAGTCTGGATAGTAAA  
CTATTTAGTTGTCAAATTTCAAACCCATCTGTTCTTTTATTAGTCTGT  
TATCAATTATGGCATAAATTGATGCTAACACTATATACCATCCTTGATCCT  
CTTTCTGCTAAATGAGAGAATAAGGCTGATGATTAAAAATGCAGTTAAATG  
TCTTGACATTACCCAAAACAAATATCTATAGTGGATGGAGAAAGACAAT  
GTGTACATGCCCTCGTATCAAAATAGCCTACTCAACATGTTTCCAAAGAA  
GACATCCAGATGTCCAACAGACACGTGAAAAGATGCTCAACATCACAAGT  
CATCAGGAAAACACAAATCAAGGCTACAAGTATATATCACCTCACACCAG  
TCAGAATGGCTAGTATCAAAAAGACAAGAAATAACAAGTGCTGGTGAGGA  
CGTGGAAGAAAAGGAAACCCTTGTGCACTGTTGATGAGAAATGTAAGTTGGT  
GCAACCACTGTGGAAAACAACATGGAGTTTCCTCACAACTTAAAAATAG

AAATACCATATGATCCAGTAATTCCTCCTGGGTGTTTACCCAAAGAAA  
ACAAAAACACTAATTTGAAAAGACGTATGTCCCTCTATGTTTCTTGCAGC  
ATTATTTACAATAGGCAACATAGGGAAGCAACTCAAATCTTTACCTAGAG  
ATGAATGGATAAAGAAGATGTGGTGTATATATATGTGTATATAATGGAAT  
ATTTCTCAGCCATCAAAAAGAGTGTGAGCTTGCCATTTGTGACAATACAG  
ATGGACCTAAAACATATTATGTTAAGTGAAATATGTTAGAGAAAGAAAAA  
AAAACATATGATTTCCCTTATATGTGGAACCCAAAAACCAAGACAAATCA  
AGAAACAAACAAACAAACAATAAACAGACTCTTAAATACAGAGAACAAG  
CTGAGGAGGATGGTGGGAGGAAAGGTAAAATAGTGAAAGGGATTAAGATG  
TGCAGTCTTCCAGTTATAGAATAGATAAGGCAAGGAGATGAAAGTACAGT  
ATCGGCAATATGGCCATAATACTGTAATAATGTTATATGGTTACAGACAG  
TGATTACATTTATCACAGCGGACACTGAGTAATGTATAGAATTGTAGAAA  
TGTTCTACATCTGAAGCTAATATTACATTGTATGCCAATGATACTTCAAT  
AGTAAATTAATAATAATAAACCTAAAAAACAACCCCTATTCAAAA  
TGTCACATTTGCTCTTAACTACCAGGATAATCTTTCTCATTAAGTGAAGT  
GCAGTTTCATTGTATAAATAGTTCTATAACTTTTTTCTTACATCTTAATG  
TTGTATTCAATTAAGCGGTTTGTAGTGTGCACTACCTAAAATGATTCT  
TGAGAGAATCTCTTAATGCAACAGAGTAAATACCATCTGTCCAGGACAC  
TAAGTCCTAAGGTTCCCTGTTGCCCTCACATCTAATGAGTGCCATGATATC  
TCCTAAATTGTTTTATATTTACATTCCCTTCCCTCCCCACAGCCACTTTG  
CTCATTTGATTCTCACCTTCATTTTGGTTCTCCTGGATTATTTTCTCTAC  
CTCTTTCATGCTGCTAGAATTCTCTTATTTCAAATGATCCTTTGTGGATT  
AATCTCCAAAATAAAAATCCGATCATGTCTTTCCCTTGCTTGATCAATTC  
ACTGGGTTCCGTGTAGCATGGCATAAAAGGGATTTTGTACCTAGCTCAT  
GGTTTCGTTTCATGGACATTCTCTCCTACACATTCTAATTGAAGTGTTC  
AGGATATTCTGTTCTCCTTACTTTGGGGTTTAGGGCTTTAGAAATGCTA  
TTCCCTTTTCTGAAACTCATTCCCCAAATTGTACCTGGATAATTATTAT  
TTGCATTTCCCTATTTCTGCTTCAATGTTATATTCTCCTTTACACCTTTCC  
CAGTCCTCAAAGATGCCAGTTGCCCATACGTTTGGTGAACATCTTGCCC  
TAGCAGTTATTAAACCATGTTACATCGCCCCTATAATTCTTTCACCTCACT  
TGTAATGTTGCATACTTTTCTGTCTCTAGACAATAGACAATTTGATGACA  
AGAGGTTATGGTCATTCTAGTTATCATCATATTCCCCAGGACTATTTGCA  
TTGCCTGATATAATGTTGAGGCTCACTGAATACTTCTTGAATAAATTGAT  
CATGAATTACTCTCCATTAAATAGAGTAAGAAATGGAGAATACATCAGCT  
ACCAATTAAAAATTAATCATCACATAACTATATAAAATAAATACATCAAAT  
ACATGAAAAGAAATAGATAGGGTTGGAAGGGCGAATGGAGGGTGTGATGCT  
TTGGATAAGTTGACCATAAAGGTCTTTTCTAAAAAGGTTTGAGCTGAAGC  
CTAAGTCCTAAGATCCAAGGCCAAATGCCAAATACAAATAAGTAAGAATT  
TGTTCCCTTACATTTTCTCTGGCAGGAAGAAGAAATTCCCTTGAGGCAATGG  
GACATTAGGCACATAAGTTTGGATGAGGCAGATGTCTGGAACTTTTAGG  
AAATGAGGAGATTTTACCTATGGTATTGCCCTAGTGGGAGAAATGTGAGC  
ATATGGGGCACACCATATGATAGAGCAAAAAAGTTAAAGATACTAACAG  
GAAGAAAAAGGAGATGTAAAAAATATATATATATATAAATTATATATA  
TATATGTATATATATACACACACACTTATATTTTCTCTCTTTAAACGAGA  
GTGAAAGTTAAGCATTTAAACACTTGAGTCTATTCTTTTCTCTGAGAAC  
CTACACATTTCTGCTTTTCCAAAGGGAGTATATCCTTTTCATAAAGATTCT  
GAAAGCTTATCCCAATAAATTGCTCTTTTCACTGAAGCAAATGATTACA  
TTTATTTTTTTTAAAAACATTAAGAAGGTGATGAGATCATTTATTGTTGCT  
AAACTTTAATAGCGTCTAAGTAAGGGGGTTCGCTATTTTTTTTTTCTTG  
TTTGTCTGTTGTTTTTCCGCTCCTGCTGGACCAGTAGCAGCCTCCAAAT  
GACATGACGCTAAATCAGATTTTTTTTTTCTTTCCAATTTGAAAAGAAAA  
AAAAGCAAACCTCACCTCAGCACCAATGAGGCAGTTCATGCTGGTTTTT  
GGAAAAGGAATTAGCTCCAGAGAGAAAAATAACAAAGTCCGTTCTGAAAT  
CCTTCTATATATTGAAAGGCCAGTTTGGAAAGGAAATGCGGAAAAACAA  
ACAGAAGGTACCCAGGTTTCTTTATCATACCTGCAGAAGGATATGCTAAA  
ATCTACACAGCCATACCCTGGCGCCAGGTCTTCATTATTTTTTCTCTTTT  
AAAATGGCACCCACTGCTCTATAAAATGATCTATTGGGACTTCAAAGCCG  
TGGCAATTGCATGTGGCACAGGATGTACGCAATTAATTATGTGATGCTTA

AATGACAGGGTGTAGGAAAAATAGGGGAGAAGAAAAAGTTAAAAA  
AAACAAAAAATCCAAAGTAACTGAAAGACCTGGTTGTCTG  
CCTGCCAAGAACCAGTAGCAGATAAGGCCTCTAGTTGCCGTGGAACTCG  
GGCCTCCAGGAGCCAGAATCCAATTTAGAAACCACAAAATCAACATAAA  
CGTGTGCAAAAATAAAAAGGTTTGTGGCAAGTAATAAGGAGAAGGGTA  
CCAATGTATAAACACATGAACCAAGGTGACCTCGGCCAACTGAAGCCGT  
AATGACGATGATGTCCGTGGCAGATTTGGCACCTCCAAAATGAGCGGTAA  
CAAGACACAGTCCACGCTTTCTGTTATCAGGTAATTGCTACCTTTTTGAA  
ATATTAACCATCCACCACCTCTTCCCATACTCACCTCAAAAACATAAC  
ACCACCTTTCCTGAAAGCAGTGCTGGTAGACCTTGATTTTAGCCCAGGAG  
GCCAGAAAACAAGACAGCTAGAATTTTCGCTTGATTCTTAGACATGAATC  
ACATTCTATACCATCCAGGACAAAAGAAAAATGGATTATACGTATAGACTT  
TAGCCCTTCTGTAATATCTGGGAAGAATAATTACATTCCAAAGTAAGAAC  
CAGGCTTCACATGTGAGCTCTTACCTGCAAACTTAAGGTTATTCTAGTC  
TCTTCATTTAATTTGCTTATGTTTGGGAATAGAGAAATATAATCTAAAATA  
AAAGCTCTTGGGATGCCCCGGGTGGCTCAGCAGTTGAACATCTGACTTTGG  
AGGAGGTCGTGATCCTGAGGTCCTGGGATCAAGTCCTGCATTAAGCTCCT  
CGCAGGGACCCTGCTTCTCCCTCTGCCTGTGTCTCTGTCTCTGTCTGT  
CTCTCTCTCTCTCTGAGTCTCTCATGAATAAATACATAAAATATTTTT  
AAAAAATAAGAAAATAAAAATAAAAATAAAAATAAATAAATAAATAA  
ATATCTTTGATGGGTAGACAGCTTTTAATTCATCTATACTCCGGGAAAT  
TATTTACATAGGCAACATTATTTCTGTGCTTTTCCCTTCATTTTCTTTAGA  
GACTAAATGCTCTCTTAGATTCACTTCATTGATAGGGTGATCAATAATTT  
GCTTAAGACCAACTTTGAATTCCTTTATGCAGAGCCCTGTGAAGACCTTG  
GCCTGAATCTTCTACTCAAGTAACCCCTTTACCACTAATATAATGCTCTG  
TGTTTCCATTTATAGGATATTACCTAGCCGTATGTCTGTGTCTCTGCC  
AACTCAAAAATAATATTGAGGTTGTTTGCAAGACAGTCAAGCTGCATTGT  
GACGGTGAATGTTTGACAAATGCCACACGTTGTGGTGAGTTTGAATTGCC  
TCATGATATATATAATATTTATATTTAAAGATTTTATTTATGAGAGAG  
AGAGAGAGAGAGAGAGGAGGAGAGGAGAGAGGAGATCCATATAGGGAGCCT  
GATGTGGGACTTGATCCCAGGACTCCAGGATCACGCCCTAGGCTGAAGGC  
AGGTGCTAAACCGCTGAGCCAACCAGGAATCACCTCATGATATATTTTAA  
ATTTTATTTATGTTTTAATTTTATTTTAAATCAACAATGATCAATTTT  
AACTAATGATGTCACTGCATTATTTTATTTACTTACAGTTCAAACCCCT  
AAATTTCTTTTTTTTTTCAAAGATTTATTTGAGAGAGAGAGATGTGAG  
TCGAAGGAGGGGAGAGGGAGAGAATCTCAAACAGATTCCCCACTGAGTG  
TGGAGCCCATTGCAGGGCTCAATCCCATGACCTTGAAATCATGACCTGAG  
CTGAAACCAAGAGTTGTATGCTTAACCCACTGAGCCACACAGGCACCCTT  
AAAATCCCTAAATTTATAAGAATATTCCTTTGTTATAAGTCAGATTCTC  
AGTTACATTATTAATTAATTAATTAATTAATTAATTAATTAATTAATTA  
TTTGTAACCTAATTTATATGATCAGAACTCAGGTCCCCCTTGTCTTAT  
ATGACAGGTGGAGATATATTTTGTATTGTTTGTGTTTACAAGTTATC  
AAGAGTAAAAGTGATGCTGATTTATAGATAAAGTTTATTCAGAGCCTGAG  
AGTTCCTGTTCCCTAACCAGAAGCTGCTGCCTTCTTATGGATACAGAGCA  
CTCTTCTATTCTTGACTGTCCAACCTCTGAACCTTTTCTGAATCCTCAGC  
TTTTCTATCAAAAACACTCAGATACTTTTAAGTATTTTCTGTATACTA  
TGTTTTATTGGCACTAAGTTTCAATGATCTAGGGTACATCATAAATA  
GATAGCTTGCTACCTCTGTAAATACAATGTTGCTTATTTTCAAACAATT  
TTTTACTAATTACTCCCTTATCTCTTAGAGGTGGGCAGAATAGGCATGTT  
TAGCCTCCTTTTACAGGTGAGGAAAAATTAGATCAGAGGTGTTAAGTACT  
GTTGCCTAGCACTCAAGTGCTCCCGTTTAGGGCTCTCTACAAGCCCGTTGC  
TCCTCCTTTTCTGTGACCTTTATTACCTCCTCCTCTGACTCTCATCAACA  
CCGCTGAAAATACTTCTAATTTCTTCTGGAAATGAACTCGGTTGGATGAT  
ACTGTGCATGTACACAAGCCATATGCTGACTTTCATGTAGTGGGAAGCTC  
TGGATGGTACCCTAATAACTAAAGCTAGAAATATTAGAAATGAAAGTGAA  
GTATATTTCTTCATTTCTGACAAAAAATTTCTTTATCCCTTCTGCATTT  
TAAACCTCAAGTATTATTCCATTGATTTATCGAACATTCCACATTGGCA

TATCTCTCATACCTGGAAAATCTCTTAGCCTACACTCGTTCCTGCCCAA  
TTTAAGCAAAGAGCCAGGGTGGACTTAGTGCTTTTTTCTGTCTAGAGCT  
TATGTTTTGTGTGAGCTGCAATATATGGGAGCAGGGACCAAGCATGGTAA  
TTGATGGGTAGATGGAGAGGGCATGTCCAGATGAGGCCCTACTAGCAGTG  
GGTGTTCATGGGCATCTGTGATAGTAGCAAGAAAACAAGCACACTGAA  
GAGATAGAAGGAGGAAACCCCTGCTCCCCTGCATCTGAAGCAGTACAG  
GACAGGGTATATGAATACCAGGAGTCACAGTAGATTTGCAGACAGTTTAG  
CTGAGTGTCTTCAGACTTGGCTTTTCTTAAGTACTAGATAATTGGCCCT  
TGGAGACCAAGGATTATGGAATAATCCTAAATGTAGTCATTACGTTGTG  
AAAGGTTCTGAAGAAATAACCATTTAAAAAATACCCTTTCTCCTTTTG  
TTGTTGCCAATATAGGTTCAAGTTTGAGTTTGTGTCTTGATAATGGTAC  
TCAGATATTTGCTGGTTCTTAATTTTTATGACTGGGATGTATGACTGCGG  
ACTGACAAAACCTGTGCTATCAGCCTTTCATTATCAAAACTAGTCTCTTC  
TTTTTCTGACAGATGAAAAAGCATCTATAATGAATGTAGAAGGATCATTC  
ATGAAGGTATTTAAAGCCCGGAAGAAGAGTACCAGTACTGAGCTGACAAT  
TGAGCCAGAGAAGGCATCCTCAGACAAAATGGCATCGGTCTGTCAGCCT  
TTGAATGAGCAGTTAGACTTTAATGATGAAAGTGATGTTATCAGTGCGCT  
GAATTACGTATTACCTTATTTCTCAGAGGGAAATGTAGAAGATGTAGAAT  
CAACATTACTACCATTTCATTAAACTCTGTTTTCAAAATGTTCAAGATGGA  
GACAAGCCTGTGGGTACTTTGAAAAACAACACAAAGAGCCCTTCTCTTGA  
ACCTGGACCCAACAATTCAACTTACAAAATAAACTGAGGAACTCTCTT  
TCCTGGAAAATTTGTTAGATGCAGAAATTCAGAAAAAATTGATGAGGTA  
AAAAAGAAAGAAAAACTGCCATGCTTATACCTCCCGGGATTTTAGGTCC  
CAAATTTAAGAAATTGGAACTGCCCAAGGACAGGAAAAAGACCCTTCCCA  
AGGCTAAGAATTTACGGAAGAGGTGGTTTAGAAAAACAGTGTCTCAAG  
GGCCCAAGGACCTACAGAAAAGGCACTACAAGGAAGTGGACGTTTCAGAG  
CACCAAGGGAACAGAGTGCCAGTCATTTGTGAAGAACATGGCCAAAG  
AAAGAAGGCTCAGTGGACCATCCCCAAGGGAGCCGGAGGAGCTTCACATG  
GCCCAGAGGCCCAGGAAATTAGTGGGAACTCCGTCCACACAGAGTCTTC  
ATTCATAAAGGAGCACAAAGGCAGCAGCCTCTTCTTTCCCGAAGCAAAACA  
TAATGGGCAAGCCTTCTGCCTCCACTGCTCCAAAATCCCTACCTAAGGTG  
AAAAACAATCAGAAGACTCAACCTACCCCATTTGTTGTTTTAGAAGATGC  
GAATGCTAGAGTTAGGGAAATGGAGGCTTCAGACCAGTCTCGCATTCTG  
GAAAAAGTATATTTTCCATAAAATTCGCTCACGTATAGTCCAAAGAACA  
CCCAAGACCAAAAAAGTAAAAAGTTCAGAAAGAAAACTCACTCTCGAA  
TAGATTGATGCCTGCACAGAGGCCCTCATTGCCTGCCGTGAGGAGCCTCA  
TCGATTCCCCTTCACAGGAGGCTATTTTCATCTTCAGAAAAACGAATTCAG  
GAAAAATCCTTTTCCAGAATTATTTACTCTTTCAGAACCTTCTAAAGAAAA  
CACTACTGTAGAAAACACTACTGCACAGAATGCTTCTGAAGAAATTATTT  
CTCCAGGAAGCACTACTGTATCAGAACAACTCCCCCTGAATTCACAAAC  
CGTAGGAATCTTTCCAATACATATTTCTACTACCACCAGAGACAACCTTGT  
GCCGACTGTTAAACAAACCAATGAAACACAATGGGAATACCACAACCTTGG  
TCACTGACTTGCCCCCAAAGCCACAGGCTTCAGTGTGCAAAGCTCTCA  
TCCGCAGGTGATCTATTTGAAATTCAGCTAAACCAGCAGCTACGGTCCCT  
CATCCCGAATAATGACGTGGGAAGGCTCATTTCTCATGTTATCCGGACTT  
TGAAAAATGGACTGCTCTGAGACCAATGTGCAACTGGCCTGTGCCAAGCTT  
ATCTCCAGAACAGGCCTCCTGATGAAGCTTCTCAGCGAGCAGCAGGAAGT  
AAAGGTGTCCAAGGCAGAGTGGGATACAGACCAATGGAAGACTGAGAACT  
ATATCAATGAGAGCAGAGAAGCCAGAGTGAACAGAAAGAGCAGAAGGCA  
AGTGAAGTGAGGATAACTCCTGAAAGATGGGGTCTGAACTTTTAGTCAGT  
TTAGGACATGCAATTAAAGCACCCACGCACAAGGACCAGGGCCTCCAGT  
CTGGGTCTTGTCTTAGCCATTAAATGTTGGCTGAGACAGTGATCTGCCACT  
TTGCTCATTTAGAGAATGGTGCCACTCTTCCCAGGTAGATGAGAAGAGGA  
CTTAACATACAAGATAAATATATTATTGAAGAAAGGGCTAATGATAAAAT  
TATATAACACATTAGATTTGGTATATTTCTTAAGAACCTATACGCCACTC  
CACTGAAAGAATGAGGTTTTAGAGTAGCTTAAGAATAGTTAGCTTTCATC  
CTTTTCTTTGATTTCTAAAAAATTGTTCTTTGTTTTTTGTTTTTTGTTTT  
TTTAGCCACAAAAGAAGTTCCAGGTATGGCTATAACAACAACTCATC

TTGGCAATATCTGTGACTGTAGTAGTAATGATTTTGATTATAGTTTTCTG  
TCTCATTGAGGTAAGAACAACCATTAATTCAGATTTCCAGAAAATCTTTT  
GTCTTTATAATAGATTTCAGAATTTACAACTTAAAATCAAAGCCACTTTC  
TCACTTACTGATACTTGGTATTTCTCTTCTGTCTGACAGACTGACATGTA  
CTTCATTCTTTTTATTGCAAAGTATATTCTGGGGATTTTTATTTTATTTTA  
TTTTTTTAAAGAGAAGCAATTCTTTTTTTTTTTTTTAAAGATTTTATTTAT  
TCACGAGAGACACAGAGAGGCTGAGACACAGGCAGAGGGAGAAGCAGGCT  
CCATGCAAGGAGCCTGATGTGGGACTTGATCCTGGGTCCCCAGGATCACA  
CAATGGGCTACAGGCAGTGCTAAACCGCTACGCCACTGGGGCTGCCCTAT  
TCTGGGGATTTTTTAAAGGAACCTTTCATTGCCAGGTGATTTATGGATTAT  
AAACAAGGCAACAAGCCATTAGACTGTTTTGGGACGTTAGGTTTAAGAAG  
GCCAAGTTAACATGATAGTAACATTTCTCAACTCAAAATTTCTGTGGTTA  
GATGTACTCACCAGCCACTTTTCAGACTACCACTGATTTCTTTCCTTGGTT  
GAAATGATGAGAGATAGTATCCACCCTCATGGAGCTATATCAGTCATCCT  
GGAAAAAAGGACATGGCTTAAAGATAAAAAATATCATCTTGTTGATTAATT  
AGATTTTCTCAGCAGCTTTTTCCACACACTGAATTATGTGAATAGTTTTG  
GTTAAATACTGTAGCTAAAAATCCTTCCAGGGACTCAGGAAGAGAAGGAA  
CCTTCTCCACCCAGCAGGAGGCCCCCTGCTGAGCTTCCACAAATCCCTGA  
GGAGGGTGAACCTTCTCAATACAGGAGGAGAGCCAGGGTCATCATGCAC  
AGACTCCTGAGAAAGCTAAACCTTCTTCAACCCACCAGGAGGCCCCAACC  
CAGTATCCACAGGCCTCCGAGGAGGGAGAACCATCTCCAGCTCAGGAAGA  
GGCTTCCACTCAATTTCCACAGATGCCTGAGAAGAGTGAATCTTTAACTC  
AGGAGGAAAGCCAGGGTCAGCATCCACAGACCTCCGAGGAGGATGCACCT  
TCTCCAATCCAACAGGAAGCCCCAGCTCAGCACCCACAGGCCTCCAAGAG  
GATCAAACCTCCTCTAATCCAGGAGGAGTCCCCAACTCAGCACCCCTCAGA  
CCCCAGAGGAGGGTGAGCCTTCTCCAAACCAAACAGAGACCCAGCTCCG  
TATCCAGAGTCCCTTGAGGGCATTGAACCCGTTCCGGCCAGTCAGAGGC  
CACAGTTCAACATCCAAATCCCCTAGGGGAGGTTAAACCTTCTGCAACCC  
ATCAGAAAGCCCCAAGTCAGCATCTAAACACCTATGAGGAAGTTAACCTT  
TCTGCCACTCAGCAAGAAGCCACAGCTCAGCATCCAGAACCCTTCTGGTGA  
GGTTGAACCATCCCCAACCCAGCAGGAGGGTCCAGCTCACTCTCCAGAGC  
ATCATGTGGTAACAGTTTCTCCTCTAGGTCAGAGTCAAGCTGAGCTTTTA  
CTCTCCCCCAGAGTCACTGTAAACCTGTGGATCTGGCACTTATAACTCC  
AGAGTCCACTAATGAAGTTGAACTTCTCTACCCCAACAAGAGGCCTCAG  
CTCAGTCTGCTGTGTCCCAGGAACACTTGAAACCTTCTGCAATCCAGCAA  
GAGTTTCCAGAACAACCTTCCAGCCCCCTGCTGAAAATGTTGAACCTTCTCC  
AGTCCAGCAGGGAGTCCCAACGCAGACTGGAGATCTTCTGAGGAACTG  
AACTTTCTCCAAGCCAGCAGTGGAGCTCATCTCTGCCTCATAATAAAGAT  
TAGTCCATCAATTATATCAATTCAGGCAATTTACGAAATGAAATCAACAA  
GAATCACAGAGATTCAAGATATCAGTGACTCTAATCCTATAATAATTCTC  
TGATCAAGGTTTATTTTTTCTTTAAATAATTGTTACAGTTGAAGTCATT  
GGGTAATCCCAGCAAACAAAACCTACAAATCCTATTAAAGAGTTTTTGCAT  
ACAATTCTGTATAAGAAATGCCTGATTAAATTTTGTCCGACAGAATAAG  
TTGATGGGTAGTAGATTTGCAAGTTTTTGAAGAGGGGAATAGAGGGAGG  
AAGGAAGTAATTTAAGGTCATGGTTTCTAATTTGTAAAGTTCATTTATAA  
TATTCTTTAGGGTAATTTGCTGATGACAGTAAAGCTTAAGGAGATAGATC  
AAGCTAATTCATTAACCTGCTCTATCTTCTTGAGAGGATTAAGAGATGGA  
GGAGCAATTTGGTCTGCAGAATTTCAAGCACCAGGGGAGTTCTGCAGACTC  
AGTCTGTGGACAGAAGTACGAGACCAAAATGATAGATCATTTGGCTGAAT  
TACCTCCTTCAGTCTCAGTAGGGTAATCACCATCATCATCTCAGGAATAG  
ATTTTTTTTTTAAATCCACAATAAAGAATAGTAAATAATAACTGTAA  
TGGAATAGGAAGAGTAACCTCTGACATGCATTAGTCATTTGCCAGGTGC  
TAGCTTATTTTTATAAGAGGCTTCATTTTCAATTCATCTTTCTCACAACCTA  
TGAGAAAAATTTTATTCTTTCCCTGTCTTTTCAAGAAAATTGAGGTACAG  
AGAAGTTACATAATTTGGTCACAAATGAGGAGGCAAAGCCTTGTTTTAAA  
CATAATCAGTCTGATTTTCAGAACCAATTTTACTGTTCTTTATAAGTGGA  
TTGCCAAGTTAAATGTTCTATCCCTTGTTTCTATTCTGTAGAGAAATA  
GGTAATACTTTTTCTCTAAAGACAAAAATTACTTTCTAACACCCAGTCATT

AGTGAAGAGGGACAAAATAGGATAAGAAAGGGGGCATCTGGGTGGCTCAG  
TTGGTTAAGCTTTTGGCTCTGGTCACAATCTCAAGGTTGTAGGTTTGGGC  
TCTACACTCAGACTCTCAGAGTCTGCTTGGGCTTCTTCTCTCTCCCTCC  
CTCTGACCCTATTTACTCCTAAAGTAAATAAATAAATCTTTTTTAAAAAT  
AGGATAAGATATAAGGAAATAAATAAAAAGGGAAAATGGAGTATAAATTCA  
AAATATTTTAAAGAGGCATGGACGCTAACTATTCTAACAATGGTGATTTGA  
ATCATTTCTTTCTTTCTTGTGTCAGTTTGGCACACAAGCAAGTCATTCAACC  
TCTTTAAATTCCGGTTTCCTTTTTTAAAAATTAATTAATCTATTTATTTA  
TTCATGAGAGACACACACACAGAGAGGCAGCTATATAAGCAGAGGGAG  
AAGTAGGCTCCCTGTGAGGAGCCTGATGTGGAACCTGAACCCAGGACCCC  
GGGATCACACCCTGAGTCAAAGGCAGATTCTCAACCACTGAGCCACCCAA  
GCATCACTAAACTCCAATTTCTCATCTTTACTTTGAGTATTATAAAGAC  
CAATGATGTAATGTAGGTAAATAAACCTAATATAGCACCTAGATCAGTGA  
AATGATGGTGATTGCATTACCAGTGTTAAGATTAGAATGTTCTCTCCAAG  
CAATTGGATAAAAATTATGGAAAATAATTGTGTGTATTCTTTCAAATTT  
GTTCTGAAATCTTACCAAGTGTGTTGGAAGCATCTTTAGTCTTCCATAC  
CATGAGTGATCTAGGGAGCAGCAGAGTAGCAGGAGCTTCTTAAAAATGCA  
GACACTGTGGCCACACCTCAGACCTGCCAAATCTGAATCCCCAGGAGTGC  
TTTAAACGTTGAGAAGTACTGGTTCATAGAAATGGGAAATGAACTGATGG  
CGTGCATACACAGGCAGAGGAAACAGTGAAAATCCTTGATTTCTGGTTCA  
AATAATTGGGAGACTGAAAAGTTAAAGAAGTTTTTCCCTCATGTGTTTTA  
TTGTTGTTGGTTTGGTTTGGTTTGGTTTCCATTGTTTATTCGAGCTAATAGA  
AACAAAAGGACCACAGAAGAGGAGATATCGGGAATAGGACACTTTAGTAA  
TGGAACCAGGTCCCTGAGGTCTTCTTGAACCTCAGAAAAGAAATAGGATGGA  
ACACAAAAGTGTCTGGTTTGTGCGAAGGGAATCCAGTCCTTCCAAGATAGA  
GAAGAAGGGGCCCAGATGCAATTCATTGTGTGGGTACCTCTTCAGCAGGA  
AGCTAAAGAAGTTAGTGAACAAAGAGCAAGATCTCAAGTGAGATGTGAGT  
AGAGCTGCCTTGAAGAAAGGAACAATGGTTTATGGAGGATGGGAGAGAGG  
GATAATTACAGATATAATGACCTGAAGAAATACTGAAGCAGGTATGAGGA  
CTAGGACATTTGCCAGAGTGCTTCCCGGGCCTGAAAGAAGATGAGCCTAA  
CCGGGAAGCCATCCTGCCAGGCTTTGGCTTACTTTGGTTCCAGAAAGGTG  
GAGAACTCTTTCTCTGAGAGCTTGAAAATGCAGGTCCATGGTGATTGATG  
GAATGGGGACTCTAACGTGTGTGATTTCATTGGTCAGAAGATGAATTACAG  
TGGGTTGGATAGGTGAGGTGAAAATGAGCCTGGTGGCAGGAATTATCCAT  
ATCAGAATAAGGAAATGTATAAGAGAGGGATGAGATAAAATAAAGGCAGAG  
CACAATGGTCTCAGGGGTTATAGCAAGAGCCATGAAAGGCATTTGGTTGA  
ACATCCAGATACTATGGGAGACTCTAATTGTCATGTGCATTTGGTCCAAAC  
TAGTTTTGAAAAGAGGGAGAAAAGGAAGGAGAGAAAGAGAGAAAGAGAA  
TGAGAGACAGAGAGGAGAACCGATTGCTTTCTGGGACAGCACTTCAGGCT  
CTGAAGTCAGAAGAGTACACCCTAAAGTATGATTTTATACTAGTAAGGTT  
AGGGAAAATGAAATGTCTTCTCCCTCCCGAGGACTATAAAAGAGCCATGAGAAA  
AAAAAGCTAATTCCCATGCCCCAACAAACAAAATATCAAATGGAGCCATC  
TCCATTCCAGAAACACAAATGAAAATATAGAGAGACTCATATGAAATCAT  
TGTGTTAATTTATCTAATTAGTATTGCTTTTCTGTAGAACAATACATCTA  
AACTATTATGGTCCATGTTGGAATTAGATTTTTTTTGTCCCCACTATTTT  
CCAAGAGAAACCACTTTGTGACAGCAGAAATGAGACATTGTCCTATTGTGG  
ATTACTTGTTTTTTGTCTATTCTGTAACCTAAAGAAGCTTAGCTTTACACA  
GTCAGTGCCCAACCATAATAACACCATAACACCATTCCCCCATGATTTGAA  
GATTTAATTATATTGACATAAATGACAGACTCTAAGGAGGTCCCAATAGA  
AGTCACAGTAGGTTTGTGAGTGTGTTGTATGTATGTGTTGTGTGTCTGT  
GTGTGTATAAAAATGTTATTCTCTCCAAGCTAACCTGCATTGAGTATTTT  
AGATTGAAAAGTGCATAACCTTTGATTAAATATGTTAATATTCTATTTTTT  
AAGATTATTTATTTATTTATTTATTTATTTATTTATTTATTTATTTATTT  
ATTTATTTGAGAGAGTTTAGTGCTCTAGCACAAAGCACAGGGGTGGAAGGGA  
GGGCAAAAGGACAAGGAAAGGGAGAAGCAGACTCCCTATTGAGCAAGGAG  
CCTGATACCAGGCTCTATCCCAGGATGCTAAGATCATGACCCAAGCCAAA  
GGCAGATGCTTAACTCACTGAACCGCCAGGTGCCCCAAATATGTTGTTA  
ATATTCTTATCTCTTCATGAGTATTGTGGTCAGAAAATCTGTTTGTAGGC

AGCAACTGGTAGCAAGACCTGGAATAACCAATTCCCTAGTGCTCCTGTGC  
CACCTATCCCCCAACTTGGACTTGCCTAAGACCTAAACTCAATCACTAAG  
TGCATCAAAAGCTTTGGAGCTTGAATTTTGGGATCTGTCTTGAGTTTTCA  
TTCAAGCTCTGCCACTTTGCTTTTTGTGTTATTTTGGATAATTTATTTAA  
CCTCTCTATGCTTGTCTTGTATCTTAAAAATGGGGTAATCAAAGCCTCT  
GGCACCTAGGCACTGTTGCGAGAATTCAAATGAGATACTGTGGTAGGAAA  
GCGCAGCACAGTTTCTGGCTTATAATACATGCCTAATAAATGCATGCTCA  
TATTATGTTCTTCTTTTCAGAGATACAGTTGAAGGAAAGTTATTCCTCCA  
TACCTTGAGTTATTATTAGTAGAGCTATTGGTCTGAAATTCAGTTGTTA  
ACGTCACTTTTAACTTCTTGGAAGGACACTGCTTTCTTACACTGAAGACG  
AAAGGCAATTCAGTTGTGCCCCATCTCCACCAGCGGATAGCTCTCTGC  
CAGTTTCTCAAGATTTCTTTTAGTCACCTCCAGCTGAGTCTATCCTGG  
TACATTCTGTGCTACTTTTTAAAACCCCTACAAGCCAAGAAAACAAAACACA  
CACAAGTGGGTTCAAGCTGAGAACCACAAGCAGAAGCTCCAGGAATCC  
ACATGCCTGCAGGCACTGAAGCTGCAAACACCACCTTGTTTTAAAGTTGT  
GCCCAGGTCAGAGAACCCCAAGAAACATTTCTGTTTCAGCCATAAAGCA  
TCCAGCACTTGCACACACCATTGGAGACTCAGCTGCATTTGCTTCAATCA  
GCAGATTGAACATCCGGAGCTCAGAAAACAAAGAGCTCCTTGCTAAAGGC  
AAAAATATACAAAGTTCTTATTGGAAAGGGGACTTTTTCTGGATCTCTTG  
CTATTAAGATAGCATTTACTTCTCTTGTCTGGAACCACATCCAAGTTG  
ATAAGTCCTATGAATGAATGTAAATAATACTTCCCGCAGGAGTTTTGCAC  
ATTCTCAAAGCAGAGGGCCAGGTGACACGGGAAGCAGAGAAATGCCATTT  
TGAACAAGTCCTTCATGTAAGTAGGTCTCCCGATAATTTTTTCAGGAAGA  
GATCCTGGGGCAAGCTCATCAGTCTTTTTAATCCAAGAGGTTTCCTATTT  
TTAAAAATTATACAGGTAAAGGAACTGGCCCAGAATCATGTGTATGTTTA  
TACAAAGGGTTGACTGGTCAAGGGGCTGCATTTCTTACTAGGGCCACT  
CAGAGTTGGAGAGGAAGACCCTGCTTTAGAAAAGAGTCCCCCTGTAGGT  
CTCTGCCAGTGAGACAATAGTAACCCAATTAAACAATTCCCGAGAAAGCC  
AAGAGCAATGAAGTGAAAACCAATGAGGTGAAAGCCACTTGGATCGTTCC  
TGGATGAGGCTGCCAAATCAGTCACAGAGAACCTGAAGAGGGGACATTTT  
AATGAGGAAAAAGTCCTTGCAACAGACCTTGGTCTTCAACTCTCAATTCC  
ACCTGGAATCATCACTAGGCAAGTTGATCTGAGAGGTTTATGAAATTTGA  
AGAGTTTAAGACTCCCTCAGCCCAAACCAAGCTTTCATGAGTACAGCCGA  
ACACACAAAACTGCAGAACAAACAAAACCCGAAAAAGTTTCTTGCT  
CATCTCACTTTAAATGTTGTATCGTTAGCTTTCACCATTTAATTTTTCT  
GTTGAGCCCGTCTGGCAGCACAGTTTGGACTGTACCTCATACTTCTCTGC  
GCACAGACCCTGTCTACATGCAACACTGCTATAGAAGCCCTCCAGGTTCC  
CCTGAGGCACCACACCTCCCAACTCCCCGCCACGGCCCTCAGCTGGCCGG  
TCCTCAGAGGCTACCCAGATGCCCTTTGACACCCCAAACCAAGTACTTGA  
GACATGCATGGGACCTACACATTTGGACTGGCTCATAGCCAGGGGATGGA  
AACAGCTGTCTGTAGTCTGCTATGATATTGCTGTGGCAGGGGCATACAAA  
GAAGATCCCAGAAGCTCTCTCCAGGGCCGATCTCCACCACAGGCACAGCA  
GAATCAGAGTGAGACAACAGGATTACTCAGCAAAGGTGTCTGATTGAGCA  
GGAGCTCGGAGAACACAGAAAACTTCTTACAATACTGGAAAACAATGTA  
ACCTGCTCCTGGTGGTGAGAGGAATGTTACTGCTCTGAGTCCATGAGAAC  
ATTCAGATGCTCACAGTGTGTGGAGCAAGCCAGGAAGCGTCATGGTTGCC  
TGTCAGTAGCTTCTTGGCTGTCTGTTGCCACAATGCCTCCATCAGAGGCG  
AGGCCGATTTCAGGTGAGCAGGTGCTCCTTGGAATGCACAACACACTCCT  
TTCAAAATGTAGGTCGCGCCCTTTCCATTTCCACAAACTGGCCTATAA  
AAGCATTTCTGAATTTGGGGAAGAAATCATGCAAAAGGAACTTGTATTTT  
ACTACGTTTTCTTTTCCCCAGGCATCACAAGGCTAAAGAGAAAACGACA  
GTACAAAGCAGGGCAGAGGCTGTTTACCTGAAAACACACAGCTTGAAAAT  
AAAGGTTGGCTTCCACTCACAGGCAGGAAATGTGCCCTGATATCTCCTTC  
ACCTTTTCATGAAGCCTCCGCACCCATATCCTGACAGCAGGTGGGGGTGA  
TGGGCATGTGATGTGACAATACCAGCACAAGGGGGCTGAGCTGGGGTAAT  
GCATCGGGATAAACTCTAGTACGAGTGGTCACTAGAGCATACTGCATTTT  
AAGCAGATAATGGCATGGCAGGCCACTGAGTGTTCTCTTAGCATTTGCT  
TTCCATTCCCAAGTGACCCATCATGGGCCACAGCATTTTCTATGACATTA

AAAAAGGAGCAGTTGTGAAGGTTTATAATTTGATAATTGGTAGAAGAATG  
TCTGCGAATAAAAAATTTTAGAGATGGCCATTTTCAGCTTCCACCATAACTA  
ACCTAATGAAAATTCATCTCATGAAAATTCCTTTTCATAATTCATGAAA  
AGCTTCAGAACGTCAAAATGAAGTAATAAAATGTCAGAAATGATTCAGGA  
GCAATATAAAAAACCAACAGTTTTGTATTGGCTGCTGTTTATGTCACCTTG  
CACTGGCACTTGTTTTCTTGATTCTTGGTGGCACTAGACATACAATAGA  
TACTACAAGGTAATCAATCGGTGAGAATAATCCACACAGATGGCCACGTG  
ACACTGTTTCGAGACCATCTGACATATACATATCTTTCTTTCTTTTTATTC  
TGTGAGATTATGCCTTGGGATCCTTTTCTAAAAGCATAAACTCATCGTGA  
AAAAGCAAATCCACATTTTGTAAAAAGAAGCTTGTTTCTCTGGTATCTAA  
AACTTAATATTTCTTCATTCTGATAGACCATACACGGGTCCTTTTCTAAA  
AGAATAAACTAGTCACACACACAAATAATGTAGGAATATGGCTCCTTTGT  
TTTAGAATCTATAATATGAATTCACCTTTTTTAAATGACGAGTTCATACTT  
TAACACACTGTACATCATATCCCAAATCAGACAATAAAGGTTTAATATGT  
GAACCCAGAATGAGTTTCTGGTTAAGTACCAATGCCTGCTGGGACATTA  
TCACTAAATAACCTCACCAGAATATGGACAGAAATTAGCTCTGACGTCCA  
GCCTCGGTGTGCTGCATGCCCTCTGTGGGTACGCTGTTCTATGGAGAAGG  
TGCTGGAATTGGGGCCAGAGTCAGAAAGATCCTCAACTGTCCTCTCCGGG  
ATTTTGTACTACCTCCAAACCTGGGGTTGGTCTTTAATTTCTCTTTAAGA  
AACCAGAGCCAAGGAGCAGCTGGTACTGTTTACTCGCTTGCTGCACCTGT  
AGTTCTGCTTTGCAAGGCACAGAAATGGATTTTCTCCATGAAACATGAAT  
TTCTAGAGCTGGAGTTTACCCCATCATTCACGGGGACACAACACATCAAA  
AGCAGGAAATGAGAAAATGGCATCATTAGCGGACTGTTGAGGCTCTTCTC  
TTTTGTTTGCCTTTAAATTAATCTCTTCTGTTTACGACTCAGTGATGA  
AAACATCTTCTTTGAAGATGAATTAAGTAAAAGTGCATTGAGGAATTT  
AAGATTTATAACATAACCACCTTGAACCCTCCGTTCTTGGTGAGCCCGGA  
GAATAGCTTCAGGCAGAAATTATACATTCTGTTTCTCGATTTATGTCA  
AAATGATTTCTGAGCCTGCCATTCCTAACTCCTACATGCAACTGGACGCA  
ATTTGACCATTAGCACTGGGTAAAAAAAATGTTCTTGAATTTTTCATT  
CCTTAGGTGTGCTCTGGTCATTTTAGGAGCTAAAGCTTGAGCGTTGCCTG  
AGTCAGTCCTTGTTCAGAATGCTCTGTTGAGCAGAGCTCTCAATCCTG  
ACGACTGTGGAAGCAGGGACTTCCCTGCCATCAAGAAGCTTATAGTTCA  
TCTAGAAAGATAAAGTCAGTGCATATGGTACTTAAAGTGCCTAATTGTGT  
AATCATAATTTTATGGGCGGCCCTCCATGGCAACTTCTTAAGGTTTCTTC  
TTGTTAGTTTGACATTACTGTTGTCCAATGTAATAATCTCTAGAAGTGT  
CTACCCTGTAATGCGAACCCTAGTTGTGTCCAGCTATTGAGCACTTGAT  
CTATGGCTAGTGCCATAAGCTAAAGAGATAACATTTTGGATATGTTGAAT  
TAAATACATATTATTACTACATTAATTTAACCTGTTTATGTAGAATATAT  
AGGTATTGTTCCCATATATTTCTATTAGCACTGCCCTGCACTTTGACTC  
CCCGTATTCTATAACCAGATAAAATTAAGACATACATAATTTATTTTTTGT  
TCCTTCTATAATTCATTTCATTCATTACGATAGGTGCTTTCATTTCCCA  
CTTTATGAATGAGGAACTGAAGCAGACGAGAGGTGTGAGGTGCGGTGC  
GGGGTTTAAACTCAGGCAGTCTGACTCATCTAGCATGTTTTACTCTAGTA  
ATCCAGGGAAGAACTATGAGGGTCAGAACCAATGCGAGGTGGTGGATT  
GGAAAAGAAAGAAATGAAGTGAAGTATATCACAAGGCCATATGAACACA  
CCACAGTGACCAGTTTGTCTGTATGGCTTAAGGGAATAGAGACAGAGTTGA  
CTCCCAGATTCTCTGGCTAGGAAGATGGTATCACCACAAATAGGAGAC  
ATGTAGGAGAATTACATATAAGTGAAAATGATGAATTCAACAGTCAAATT  
GTAAGAAATCCAAGTGGAATGTCTAGTAGGCAGAGATGGATAGATAGAT  
AAACAGATAGATAGATATGGGCCCCAAGGGAGATATTTAGGTTGGATATA  
TCAATTCTTATTTCATTTGCCCTCATCTCTCCCCACTATCCCCAATG  
GCTTTTGCCTTTTGAATTACAAGGGAGCTTCATAGTTGAATGAAACATCG  
TTCTGACTTAAACATTCATTCAAGATTCTGCACAATTGGGTCCCAACCT  
TTTTGGTAAGCTCTCTCTCTCTGTGTGAACATACGCTTTGCTCCAGCCA  
AACTAATTTATGTGTATAACCTTGACACTAGTTGCACTCTCTACACACTT  
GAAGAAGGAGATTTAAAGGGAAGTGAAGCCATCAACAACACAAAATGTGGA  
ATCTAATGCTTTCCCTAAGACTTATTATTTTAAAGATTTTACTTAAAAAT  
AAAAATACGGACACGAAGAGAGGCAGAGACATAGGTAGAGGGAGAAACAAG



GATTCTTCAGGGAGATTTTCTTTTTATTTTGAGATAAAATGGAATGCTAT  
T TACTTGAGGTCTACTTTGAATGGAGCCTCTGAGTGTTTTCGACTAAGGC  
CATTTAAGTGGGATTTAAAAACGCGGCTTACTTACTATCCCAGTTTTTTG  
TTTTCTTAGGGAACTTCAAATTACACCTTTCTGTTCCAGGGTTGAGCTGC  
AGTCAGAACGCTCAATTAAAATCATCCGTAAACTGGAAGAATGTGCGAAT  
GTTAGCTTAGGAACTTAGTAATTATAAGAATTCATTTAGTTGGCTCTCTA  
CACAGAGCCTTAAATCACAAGTGAAAACATAAGGAAAAAGAAAGAGTTCC  
AATTCTGGATGCCTCTTTGGTCCATCAGGATAGAACCCCTCACATTCAC  
CGAAGGGCCATTGGACAATTTTGAGAATTCCTGCTCTAAAGAAGAAAGAT  
ATCCAAACTCGTATCCAGCAATCTTTTCCTGGTGCTCTGGCTCAGCAGAT  
AAAGAGGAAGTAACACTTCTTACTTAAGTGTATTTCTCCTTAAGGATAAA  
TGTTTTATTGGCCTAATGATTTCAGATTCATAAAATAAATCTATTAGCAAT  
ATTGTATTAGGGACTACTGATATCCCAAATGAAACCTGCCAAATAAGAAA  
TTGAGAATTGTTCCATAAAATATTCTTAAGCAGCTTACTTTATATAAAGT  
GTCTATCTCTTAGAATTTTAACTTTTATCTTTCTACTATTCTATTCTCCT  
GGCTCTCCCTCAGTTTCACACACACACACACACACACACACACACACAC  
ACACATCAGTGTGTATATAAAGCATACTACATAGTGTATGTATATTTGTA  
TATAGATATATACTTTAATAAAATTATTGATACCACAGTCATTCTCTCCTT  
CACCTTCCCTCCTGCTTTTCATTGCCATCCTGGATGCACATTCTTTCCTTT  
CCAGCCTAGCTTTCAAAGCCCATCACTTAAACTCCTCTTTCATAAATATG  
CTTTTACCCCATGCTCCTTCCACCTCACTCAGGTGGCAAAATTCACAACC  
ACAGATCAACCTAAATGTCTAGTCTTTAGATCTACCCCTGGTGACCTATC  
CCTAACACCAGTGAGAAATCACGGTTGTACAGATCAAGAGCACTATAAAC  
TTTTGGTATCTAACATTAACCTGGTTCTCAAAACTGCCCTGAAAACCTCTG  
CCATGGATTGGGTTTCTTTGAAGCACCCATGACAGGAATTCTTGACAGG  
GATTTATTGAGAGAGTGCTCACAGGAAAATGAGCGTAAGAAAAGCAGGAT  
GGGGCAGGAGGGGAAAAAAGCAAAGTTTAAATTCTAAGTGGAAAGTGGCT  
TTTGACAGTTCCATGGAAGCTCTGGGGCAGGCCAGTCAGTCATAGATGTG  
GGCTGCTGCGCCCCAATCAGGGGGTGTGGGGGGGCCTAGGAGAGCCAAGG  
CTTACTCTTCTAGGTGAAGCCATTCTCAGTGCCAGAGGGGGAGGGTGGA  
AGCCACTGGCCGCCAATATGCAGAAGCACCAGCCCAGAAAGGACCTGGAT  
GAGCCCTACATCTCTTCATTTTCTTTAGTAAGCTTTCTTGATTATTCTTC  
ATACAAGTACTCCAAGCCTCTTTTTTCTCCTACCTCTGACCTCATCATTT  
CCCTCATCATTTCTCAGCCCAGGACCTTGCTCTGTTTTCTCAGAAAATAC  
AGAAACCCAATTTGGAGTCTACTGTGGCTTCAAGACCAGAATGTCCTGA  
CTTTGCTTATGTCTCTAGTTTCTACCTTATTCACATTCATTCACTGTTTA  
AGCCCTGGTGAACCTCTTGAAATCACACATCAGACCACCCGCCCTCCTCT  
ACTCAGAATTTTGATTTTTTAAATTATCAAGAATTATGTTTATATGCTGTT  
TATTCATATAATTACATAAAGGCAACATTTATCATTGATGAAATCATG  
GGTTTTCCACTCTGAGTTCCTTCTTTGGTTTGGATTATCTTTTGCTTGG  
TTGAATTGTGAAATCCAGTAAGATTTTTTAAAGAAGGAACATACCTCCTTG  
CTAGAAAATGTCTATTGGTTGGCTTAGATTTTTTACACATACTTGCAAAA  
TACTTTAGACCGACCGTGAAATCTTGGATTGAACTCACTTTACCTCAAA  
ATTTAGTAGACATTATCTAATCTAAGTTCTGATACTGGGTGTTGCTATCA  
AAAAGTATAAGGTCCACCTTGAATCTATTCTTCATACATAAATTTGATGTT  
TTAAAAAACTTAGATGTATATATGATTGTATATTTTTGAAAATTACAGT  
AATTTACCAGGATTTATCTTGACATTAATTATTTTACATCAGTTTTTCTA  
AAGATCCCATATTTTCTGAGATCCAGATCCACTTATAAACTCAAACCTGA  
TAATTTTCGAAAAGTTTTCTACTATTTTATTCAATTAATGCATTTTCTCT  
TTAGAAAATAGGTATGTAAATGTGAGGTCTATCTGTTTTCTCTCATATGTA  
TCATCTGTATAGTCTTTCTAAATATTTCTTCTCTGTTTTCTTGATTTTTA  
AAAATCATGTTTATGATCTTTTTTCTTTTTTCTTGGTCTTTTGATTTTT  
CTTTGAACTCTAATATGTATTTTTTAAAGATTTTTTTTAAATCATGTTTTTG  
TCCCAACTAAAAGCAAAGTTTCAAGATGCAATAATCTCTACCCATTTTTTA  
AAGGACAGTATAAGAATCAGAAGTGAAGTAAAGATAAGCAAAAATAGAGA  
GATGCATTTAAAACATAACATTCCAGCTATCATATGTAATAAGTATGGAA  
TAAAAGTTTGAGTTAGTAGTAGTTTTGTTTTTTTTTTTTTAAAGAAAGAA  
ACACTGCTACATATAGCACCTCATTTGGATGTGTCTTAAGTCTTAGAAGC

TTGACTACTTTGCCTTCTCCTACAAATGGACCTTGAGAGCTTGTTTGGTG  
GTTCTAGCAGGGGAGCCCACCTGTATACACTTAGCCCCAAGGATGGTTCT  
CTTCTATCCAGGAGATAGAACTTTGGAGAGACGCATATGGAGCAGTGAGG  
GAGGAACAGGACACCTGCCTAGCCAGCCACATCAGCCTAATCAACCCTGG  
TGATTAATAGGGTAACAGATGTTGCAGACAGATCGCCCTCACATTCAGTA  
GTGGGTTGAAAAATATCATGCGTAGGTGGTTCAGTGTTGAGTGTCTGTC  
TTTGGCTCAGGTCGTGATCCCAGGTCCTGGGATGGAGTACTGTATTAGGT  
TCCCTGTAGAGAGCCTGCTTCTCCCTCTGCCTATGTCTCTGTCTCTCTCT  
CTGTGTCTCTCATGAATAAATAAATAAATCTTTAATAAAAAAGAAGAATT  
TTATTTTTCCTATAAGAGTTAAATCAAAAAATAAAAAATCATGTTTTTCT  
CAATTTTCAAACTGAAAATTTCTATATCTATTTTCAGATAATGATACTTT  
TTTCTTCGTGTGTGTGTGTGTGCGTGTGTGTGTGTGTATGGTGATTTT  
TTTTAAAGTTTATTTACGTATAATCTCTATACCCAACATGGGGCTTGAAC  
TCATGATCCCAAGATCAAGAGTCGCATGCTCTACCAATTGAGCCAGCCAG  
GCACCCTGATTTATGGTGATTTTTAAGGGACTTTTGGGGAGAAGAGTGGA  
GTAAAAATATTTTTACTCAAGCATACTTAAGCAGATGCTTTTGACACTGA  
ATTTTTTAAATGTTTAAAATTTTCTATGAGGGAATTGACTAATTTTCAATT  
GGGATAAATATGATGTGGGATTCTCAAAGGAATCAACAAATCCTAGATG  
AACATATAAAATGAGAATCTGAACTGAACACAGGAGTCTGAGCTGACTA  
AGAGTTTTACTAGTTTCTCAAGAAAAGGAACAGGACCCACACACCAGCAA  
TTTATTGATGTAAATAATTATGAGTTATCTCAAAGCAAAATAGATACCTC  
ATCAGTTCATCTTTTTGTTGTTTTTCATAAAGTACCAAGGAAAGAAGGCTT  
CCAGATTTTGTACCAATTAAGACCTGTGCCAGATGGGTCTGCAGTAAA  
GTTCTGATGCTTAAAGTGGGCAACCAAAGCAGCACTCTTTATGAAATGTC  
ACTTTAGCAAGGCTCATTATATACTCACACATGAACTAGAAATGCTCAGT  
TTTTAGTTTTCCAGAGTTCACACTTGAAATATAGCTTCAGCAATTTTCA  
CTTATTTTAGGTGTCCCAATTATGCTCATAAGTATGAAACAACCAGGCTG  
CAACTATAAECTTATCAGCAGAAGAGTTACAAAACCTATCTAAGTTGTGA  
CTATTCTACCTAACTTCAGGTCAAACCAATTAAGTGTGACCCTTTTACAG  
GAAGCATGGTTGGCAGGCTCTCAGAAGAATTTTGTGATTTTGATTTTCT  
GTGTGGATGACAGTTCATCAGTTACAACAGATTTGTGATCAGAAGGATTC  
TGGAAAGAGAGAGCCATTATCTACATACTTAAACATAGGACGGTATTTGG  
TGTTAATAACACTGATACATGTTAGAGAAGGAATGCAGTTAAAAAATCT  
GATTTACTAATAGGCATCTGGAAAATGAGCCATTCTGAGGAAAAATGTAC  
CAACTCTTGGGGCGCCTGAGTGGCTCAATCAGTTGAGCATCTGACTCTTG  
ATTTTGGCTCAGGTCATGATCTCAGGGTTGTGAGACTGAGCCCTACCTCA  
GGGCTCTGCACTAGGGGAGGAACCTACTTAGATTCTCTGTCTCTCTCTCT  
CTCTCTCTGCCTCTACTGTCACTCTCTAAAAAATAAAAAATAATAAAA  
AAAAAGGATGTAACAAGTCTAACTTAATAAAACAGTCTAAATTCATGG  
CTAACACTCTTATCATGCAGGCCACATTCAAATAGGTCATGAGAGAGTC  
TGATGTAGCTTTCCAAAACAACGTGACATTTCAAAAACCTCTCTGTCTTA  
GCATAAATCTGGTCCTTGAAATGAGATACTATGCTATGTTAGCCCCATGC  
TGCATATTTTAAACAATAATTTAAATGTGTGTATGTGTATGTATATAATT  
TTGTATACGTTTTATCTGTGCATAATAAAATACAAATGTGCACACTTCCCT  
TTGCTTATTAACAAATTGCTAACCACATAAATGCTAAGATTAAACATATG  
AGAAGTTAGGACAAGATAACTAAAGACAACCTTTATCAAAGAGTCAGTGC  
TTTAAGAAATAGCACACAGTTTCTTGTATAATAAAATCTTTTACCATGTC  
ATTTAACAGTGTGAGTGGTTCAGTAGGCAAATATATAGTGGACCCTTGAA  
CAACACGAGTTTGAACATATACATGGATCTTTTCTGATAAATATAGGATGA  
TACTATAAATATATTTTCTCTTCCCTTATGATTTTCTTGATAACATTTTCT  
TTTCTCTAGCTTACTTTATTGTGAGAATACAGCATATAATAATTTACAAC  
AAATATGCTAATTGACTATTTTATGTTATTGGCGAGGCTTCTGGTCACAGC  
ATACTCTTAGTAGTTAAGTTTCTGGGGAGTTAAAGTTATACATGGATTTT  
TGACTGTGTGGGGTAGGGCGTGGGTCAGCATCTGTAATCCTGTGTTGTTT  
AAGGTCAGCTGTTATAGGTTAACTGATACAATCTTAAACTGTCCTTT  
GACTCTGTGAGAACGGAAGATATTAGACACAAATTCTCTTTTAACCCTTT  
TCACAATTCTGTGATTTTCAATCTCTACCCTGGCACTTCTTCCCACTACCT  
TTGCACTATCATTGGCAAGCTGCTTCATGGCTAATGGTGATGCTGACAAG

AAACTATGGAGACATATGCAGGGAGTTAGGAAAGAGACTGCATGTTTGAA  
CTTGAAAGAACAGTTCCCCAACTGTGATCATTAAATACCCACTGCCAGGA  
TTTTTGGCTCTGTGTGCCATCAGTGCCTGTACTTACTTAAGATTTTCCTT  
GAATTGATGCACAATGAAGCTTATAAAATATAAACTAGAAACATTGCAGC  
ACTGCATATAAAGAAAAACAGCACACCCCGATGTGAACAGAAAACAACAA  
TAAATATAAATAGAATGGAGATCAATCAATTTTCATTCAATTTTGAAAAGA  
TCCCACTGTCTTCAGAAAGTTCTGAGTGGCACCTCACTGTATTAGTTACT  
TTTCGTTTGTGCCTTGGGAAAGTTCCAAGTGTTAAATATTGATTTAATAA  
GTATCTAATTTTTGTGACCTTCGTGCTCTTCGTATCCAAATATACATCCT  
TCAGAAATCTTTCAGGGAGCTTTTTTCGCCTAAGTAATTTATATTCCTAAC  
AGTACATTTAAATGAAGGGATCCATTTGCTAAAAACAGCCATTTGTATGT  
ATTTAAAAGATGATATAGGCATATTATCACCAAGCTAAAAATTTTCAA  
TGAAATCTGGCATAACCAGATAATCAGAAGAGAATTTAAAGTAACTTTTT  
CACTTGTGATTTTATTTAATCTAAAACCACATTTGCTTCACACTTAAAT  
CTATCTTTTCATACTAATACTGAATCAGAGAATTATGTTTATAGTAGTTGC  
CACAAAATGAATTTTCATACCTTTCTTGAATAATTATGAACATATCTAATT  
CATTCGGAAATGTATTCTTTATAGAAGTTAGCAGAGATTTTCTTTTGTA  
AGAATGTGACATTATTCCTAATTTCAACTTTTTTCATGACTTCTTCATA  
ATATCACACTATCTTATCATTTGCTTCTCCAGTGTTACCAGATTGTACTA  
GTAGGAGGACTGCATTTTCATGAATAATACAAAATACAGATGCATAATAT  
TCGTATGATTTAAACAATACTAAAGTCATTTTGGTAATTCATTTTGGGA  
ATTCATTAAAATGCAAAACATTTTAGGAAATACTATTTTATTTATAACCT  
TTACGTACCCTCAGGGCAGAATAAGGGGGAAAGGAATGTCTAGTTAGAAA  
TTTCAAAGATGGAATGTTAATCATATCTTGAAGTTGCCCCATTTAGAGAT  
AATTTAACCAACTCAAATAAATGTTCTCTAATTTTCTTTCATTAATGAG  
ATGACTAAGTTGGATACAGCATGCAAAAAGCACATGCTTTATTGTGATGA  
AAGTGTTTTTCAGACAGGATGCTGAGGCCTCTATGACTCTAAAAAGAAAA  
GTTCTTAGAGAGATTGTATCTGTGTGATTAAACAGGTCTTTATTA  
AAAGGTGACAGGAACATTTCTCATTTTCTCCACTTCTTTTTTTTTTCTT  
GCACTTTTGATCACTTTTGTGTCACAGATGGCAAGTAGAGTTGAAAGGG  
GAGTAATTTCCATGAGGTGGCAAAGTGATTAGTGATGCAGCTGGGACTAG  
AACTAAGGTCATCTACTGTGTTTTCTGCCCTGAGTGGTCATTCATCCATC  
CATCCACTCATTCATTCATTCATTCATTCATCCATTCACCACCTGGTCTG  
GCATAGGCAACAGTGAGATGAGTAGGGGCCAGGAGCTTCATGCTCTGATT  
GTTGTACTTTGATTAATAGTAATAGGATTTTACATAGTGACAGAGTATG  
ACAAGTAAGCAAAAGACAGAGAGTAATTATTTCCGGTGGTGAGTAGTAGTA  
GCAAAGTGTTGACACCAAGGTCATTTATACAAGAATCTACATGCACTGGT  
CATAGTCTTCAGAAATCTAAGGAGTTTACTGGCCTAAAGAACATACATTT  
CTAATATTGCATCAGAATGAAGGGTTCCTTTAATGTTTAGAATGCAAAG  
GAAAAATAAAAAGAGAATCGTTTTAGAGCTGACTCAAACAAGTGTATTAA  
AGTGTATTAAAGGAATGCAGTGTCAATTTCCAAAGGAGTTAGCAGTTTCC  
AAACGTGGACCTTGACATGGAACCTTCTAATCCCAAAGAGTCATGTGAG  
GATGACAGAGGTAATATGTGGAGTGTTAGGATAGCAGCTCCTATCCTGAC  
TCTATGGATTCTAATCTTCAGTAAATGGGGATGAAAATCGTATCTGGCC  
TTATAGGCTTGTTGTGAGGATTACATGAATTTCTGTGGAAAAAGTTCAGA  
ACAATCTGGCATAGAATATGTGCTGTGTGAGTGGAGTACTTTTGGTGATG  
CTGATGGTAAAGTTTCTTTCCTGAATCAGGGCTTCTGATACACGAATGCA  
CATTGTGAATCATCAAGAGGGGGATGTGTTGCAGAATTTCCCCACATTAT  
TTGGCCTTTTTGTGAGAGCACTGTTATTAGACCAATGAATATATCCTTA  
GGATATGTGGTTGGAAAATCTGGGAGTTTAAAAATATTTGGGAGTGCCT  
GCCTAGCTTAGGTGGTAGAACATGCAACTCTTGATCTCGGGATCATGAGT  
TTGAGCACCATTTTGAACACAGAGATTACTTCAAAAAATATTTAAATAT  
ATTTTGATAATTAATGCAGAGTTACATCTATCACAGGATCTTAAGAGTT  
TTGCTTCATTTCTAAGGTTCTAGATCTGGTCTAATATTTAGGGTTACTGA  
TGTAACAGTATCTGTGTAACCTGTTGATGTTGTTGAGGACGATCATGAAA  
ACCAATATTGTTTAGTATCAGTCTGTGCCAAGCACTGTGCTGATTGCAGA  
ATAATGCACAGGGTCTTTTTTACTCCTTAACAGCAGCTCTATGAGAAGCA  
ACTGAGACTTAGACGGATAATGCTCAACACAACACAAGCCCGTTGCTCAC

AAACTAAGTTGAAGAATCATAATGTAAATCCAGTTCTATGATTCCAATGC  
CCACATCTGAAACCAGGAAGTGGCACTGTCTCTCTGATTTTGAGGATAAT  
AGCCCTGACTTGTATAGTAAGAGTCGCACACATTTTAGAGTTTTGAACAC  
TGTAGAACACAGTATGAATATAGATATCATTAGTAGTATTAATAATTATGC  
TTATAATTTTTTTTTGTTTATCTCTGGGATTAAAGCAGTACAGTACCTGTG  
TACTAATTTTTGAATATTCCTTAAATAAGTAGAACTATGAAACCCACAG  
TGTCAAACTACAAAAATGCATTTTTTTGGGGGGGGGGGAACTACCAAAT  
CAGTAGTGTCTGATTAATTTTGATAAGGGAGATCTAATCTTTCATTGAAG  
ACTTAAGCTGTATGCAGAACAAGGAAAGCAACCATCCCTTTAAGAAACAT  
GGAGAAAAATTTAGTTAAACACATCATGTGTCTAGAGTACTAGGTACCAGA  
AAAACAGTATAAAGTGCCTAGTAATTTGAAAGTGATTTATTAATCAATAC  
TAAAAATTACTGAAGATTTACCCCTCAAATAATATAAAACCAATGTGAACAT  
TCAAAACAAAAAGTTTGCTGTTTATTAGCATATTTTTTAAATTTTTGAAAAT  
AAGGTCATTTCAATCCACTGCATATCAATATCTGGGTTTCTTTCAAAAAA  
TCATTTGTTTTTAATATGAAAACTAAATAAATAATTTTGAAAATTATTAT  
TTGTTCTTATAAAATAAAAAATGTCATGCTTACTGTAAGCTGGCTTATAAC  
CTCTTTCCTCTGTTCTTGATATTCTCTAAGGTGTTACTTTAGGTTTGAAT  
GGGTAACCTTACAATGTCACAGTTCTCCTGACCTGCCACATCTAGACCTA  
AATTTGCGAGATCTTCTTTCGATAATGAACACATGTAAACCTGTTCTTAC  
AAGCCCAGCAGATAAGCTCTCAGGTACTGGAGTGCCAGGAGCAATGCAAA  
TACACAGATGGAGAAGCTGAAAGACTGCACTAATGCCCTTACAATATTACT  
AATGATCCATTATTTTTTAATGGAGGACTCTTCTTCAGCAATAAAAGGAG  
AAAAAGCTTTTGAAAGCCAATCTGTACAAAGAAATCACTGTTTGCCTGGGC  
TCTTGGCTTCAGATATATACCTGAAGCCAAGAACCACAAAAGCTCTGTAT  
CTGTTCAATTTCTTCTTGCAATAATGCCCTTGGCTTGTTACTCTTCCTCC  
TGTTCTTTTCAGACACTGTCTTGGTCCTCTTCTCTTTTGCTCTGTATGTG  
TCCCTGGTGAGCTAGTCAACTGACCCAAATACTACTTCTCTTCAAGCGTC  
GCTCATATGCTTCCCAGCCAAGATCTCTCTCCTGACCTCTGGATCTGCAT  
TGGGTATCCAATGCAGCGATTAACTTATCATGTGTCTAGGCAATATGCT  
AAGCCCCTTATAGACACTGTCTTACATTATCTGCCAAAAAAAAAATCTTT  
GGGGACTAGTAAATATCCCCATTTTGTATTTGAGAATAGGGAGGCTTT  
TTTTTTTTTTTTTAAATCTGGAAATTCACAAAAATGCAATCCTTTTTTGC  
TTCTTCTACTCTTCTTTTTTACCAATTTTTGACTGGCAACATACTGCATC  
CTGGATGAACATGTCCAAGCTGTTAATGTACCATGTACCTCCAAGTGACC  
TGTTCAACCATCCCATATGTGCCCTGACCAATGGGGCATAATGTGACTA  
TTATTTACATCAACAGGCAACTGGCACAATTAACATATCTCAAGGTATT  
TGTTTTCATTTGTTCTTAGCATGTGAATAAAGCTCTCCCTACATATTCAC  
TTTAGGATCCACAGAATCTGCATACATATATATATATATGTATATACATA  
CATACATATATATATTCTATTTGAATAATTTCTTAAGCAAGTCACCTCCT  
TTCCCCACAAGTGAACTAATTTAAAAAACCTGACCTCAGTGCTACTATA  
CACCTATTACAATGGTCAAAATCAGAATAATGACAACATCTACTGCTGGT  
AAGGATGTGGAGTAGCAGCAACTCATTCATGGCTGCTAGAGCTGCAAAAT  
TGTAACAGACATTTCGGAAAACAGTGACATACAAAGCTAAACATAGTGCTA  
TTATTCAATCCAGCAATCATCTCCTAAGTATTTATCCAAATGAGTTGAA  
AACTTATGTCTACACAAAAACCTGCACACGAGTGTTTATAGCAGCTGCAT  
TTGTAATTGCCAAAAACTAGAATTGAACATTATTCAAAAAATAAAAGAAA  
TAAATTATCAAGCCACAAAAAGACATAAAGAACTGTAAATGCATACCAA  
TAAATGAAAGAAGCCAGCCTGGAAAGGCTACATAGTGTATGACTCCAGC  
TATAATGACATTCTAGAAAAAGGCAAACTATAGAGACAGTGAAGAGATCA  
GTGTTTGCTAGGGAGAAAGGAGCAAGGTGTTTTTTTAGAGCAGTGAAATAA  
ATCTGTATGATACTGTAATGGTGGATACATGACATTATGCATTTATCAAA  
ACCCACAGAACTATACAACATAAAGAGTCAGCCCTAATGTAAACCAGGGA  
TTTTGTTAATAATAATGTAACAATATCAGTTCATCAATTGTAACAAATGT  
ACCACACTAATGCAAGATGTTATTTAAAGCAGAAATGGGTGGATTGGCG  
GGGCGAGTGAGGTGGGTACATAGAATCTCTGCACATTCTGATTATTTTT  
CCACAACTTGAAACTCTTCCCCAAATCAAAGTCTATTAATTAAACAGAT  
AACTTTTTTAACTCTTCAGAGCTTTTTTATACCGATCTGTATAAATACT  
GATTTCTTACTAGTTTTCACGCTGAATAGCTAGGAAATATTGATTCTTTCA

TTTTATCCCATTAGTTATGATTCCCTGCTCTGTGTACCTTACTTCTAACA  
CTGATGCAACATGACAATGGGAATAGCAAAAGAACATTTCACTCCAGACT  
ATAAAGTTTCTTTAGATCAATTTTTTCACTAGTTTAAATCTGCCTATA  
ATTTAATCCCTGTTTCTCTATCTCACACAAAGGTATCCTACACGATTATG  
TCACTGCCTTAATGAAAATCAAAAGGTATTATGCTGAGCACAGTGTCTGG  
CATATAGCTGTAACTTAATAAAAGTCATATTATTAATATTCTCTTACCA  
TAATCTAGTGGTCCCACCAAAAAATAATTGTTAGTTTGATATTCCTTATT  
TTTAGTGACGTCATTCTGACTCTTAAGCATCCCCATATTCTTTGCTAAGT  
GTTTAAAAATAATCTATTTAAAATTTTCTTCTTGTTTTTTTTTATCCCT  
TTAAAATTTGATAATAAGTCTACAGACTTGCCATCTATAAACCTGCCCA  
TTTTGTTCTCTTAGGAAATAGCAATATACTCATGTTTTCTCTATTTTAA  
TACTTCTAGCATATGGGTCTGGAAGTTTGAACCTCTTAAAGAGACCCA  
CTGGATATATTAGTAAAGTTATCAGGCCATCTTTGCAACCTGAGACTGA  
CAAGCTCACCTGGACAACCTTGAGTTTCAATTCCTTCTACATGATATACTT  
TTTCTTATATTTCCCTTGGAAGACAATTCTTAAAGTGAAAGATGCAGTA  
ATCCAAGGATCATAGATTTTTGCTTTCCATTTAACCCCTTACCAGAGTGG  
TGCTGGGTCTCCTCCTATACACAATATAAAGAGATACTTTGTTATTGTTT  
CTGATGATATGACATTTGTTGTCAGCTCAGCTTATACCCAACTTGAGCT  
TTTTACAAGTTTGTGCTGCTTTATTAATCCTGGGACATATTGCACTTTTC  
ATCTCTTTCAAAGATTGTTTTTCAGTTTTATTGGGGTACAACCTGACAATT  
AAAAATTATATATATTTAAGGTTTATAATTTGATGATTTTGTATATACAA  
AATATACATAAATATCCACTAGAATGAAGCTAATTAACATATTCTCTACC  
CCACATAGTTATCATTTTTTTCTTTCATCTTTTTTTTTTATGATGTTAAC  
ACTTAAAATCTATCCTCTTAGCAAATTTCACTATACAATGCAATATTCT  
TAACTAGTACATGTGAGCTCCAGAACCTCTTTATCTTGGATAACTGAAAC  
TTGTACCCCTCACCAGCATCTCCCCATTTGCCCTCTGGTCACTGCCATTC  
TATTCCCTATCCCCCTTAAATAACCTTTTAAATGGCAACTCTAATTCTG  
TTTACAAAGCCTTCAATCTACAATAAACTGGAGAGAGTGGTATTTTCCAG  
GGCCTATCACAATCAGCATTCATTTGTTTATTTACACGCAATTCCTAAGC  
ATATAGTCTGAGCCAAGCACAAATGCCTGGTATTGCTATTTTCAGGGATTT  
CACTGTATAATCAACATTCAGCAAACATTTACTGAACATCTATTATATGC  
TAGCACAAAAAGACTTGTGGAAAGGAATACAAAAGAAAGGTATACAAAC  
TATAGAGGTCTCAGAGCATATGATGGGGTTAGGGATGTAAACAAGCCAAA  
GAAATCTTCCAGAAAGATGATATATTCACTGGATTTTAAAGATGAGAA  
GTTACAGATACAAAGAAATGGACAGGGCGTCTGGCAGAGGGGATGATGC  
AGACAAATGCTTAAACATTAAGATGGGCTATTTGCTTCTGAATGACCT  
TTTTGCAGTGCTCTGAAAAAGGGAGATGGTTTACCATGTCTTACAGCAGA  
TATCAACCAATATGAGCATGAACACATTTGCAAGAGATACAAATTTAGAA  
ATAATCTACAAGTTAATGCAAAAGTTTTCTTGGAGATTACATTTCTAGAA  
TTATAAGCTTATTGTCTTTCTGAGAAGCTCCCAGAACTCCCTATGAACAG  
CAGTGGGCATCATCTCTTTCGTCTCATTTTACTGTATCTGCGGAATTCAG  
ATGTAGTGAATTCCTTTCAACCTAGTAGCCCTACCCCTCTATAGGTTTAA  
ACAATTAGTCAGTTCCTAAAAGCAACTGGCAATTGGTTGGCTCTCACGGT  
ATCTAACACAATCTTCCCTCCCAAACCTGTCTTAGATCCTCTAAACTTACT  
CACTTGCATGGTGCGCAGAGAATGCCTTAGGAATCAAACCTTCTAGTTTC  
CAGAATCAGATTAAAAAGTCAGGGACACCTGGGTGGCTCAGTGGTTGAGC  
ATCTGCCTTTGGCTCAGGTCATGATCCTGGGGTCTGGGATCGAGTCCCA  
CATAGGCTTCCCTGCAAGGAGCCTGCCCCCTCCCTCTGCCTGTGTCTCTGC  
CTCTCTGTGTCTCTCATGAAAAAAGAAAAACAATAAATTTTTTTTTTAAAA  
GTCAGATTCTCCTAGGTTAAAAATACAGATTCTGCTATTTAGTAGCTGATT  
GAACCTTTGAGCAAGATATTTACCTCTTAAGTCTCTTTCATTATCTGCAA  
AATTACAATCATAATGTATACTTTTTGGGTTGCGAGGATTATGTGATATA  
TATGCGTTGAAAATATTTAGCAGCCTTCTGGACTATGAGATACCTTTAAA  
ACATAGTAGTACATGTTCTTTTAATAAGAATAATAATAAAAAATGGGAGAG  
AGAGAAAAAAAAGACCAACACTGTACAGACTCTGCAGAGGTATCAGATAT  
TATGCTCGATGTTTTATATTCCATCTCATTTAATCCCCCAACAACCCTA  
AGGGAAAAAATAATCGCTTTCTTAAAGTAAACTAAAAATGTGGTTCACAA  
CAATGTATTAAGAGCTGGTATTCAAATCCTCTTCTGTATCTCTAAAGCCT

AAATATTCTTTTCAATACATCATACTTTGAAAAATAATGATTTGCACAAG  
TATATCTATTAATCCCCAAAGCCGTGAATAGTATAGCCAAATAATTTCAA  
ATACTTTTCATATTCAGCAATGTTAAATTTATAGTTTACATACAGTTTTAA  
AAGAACAAAATTGATGTACCCCCAAACCATAAGATACCTAGGAATAAACCT  
AATCAAAGAGGTTAAGGAAGTATACTCCAAAACTACAGAACACTTATGA  
AAGAAATCGAGGAAGACATAAAGAGATAGAAAAATATTCCATGCTCATGG  
ATTGGAAGAATAAATATTGTGAAAATGTCAATGCTACACAGGGCAATTTA  
CACATTCAGTGCAATCTCTATCAAAATACCATGGACTTTCTTCACAGAGT  
TGGAACAAATAATCTTAAGATCTGTATGGAACCAGACAAGACCTCAAATA  
GCCAGAGGAATGTTGAAAAAGAAAACCAGAGCCGGGGGCATCACAATGCC  
AGATTTCAAGTTGTACTACAAAGCTGTGTTTCATCAAGACAATGTGGTACT  
GGCACAAAAACAGACACATAGATCAATGGAACAGAATAGAGAACCCAGAA  
ATAGGCCCTCAACTCTATGGTCAACTAATATTCAACAAAAGCAGGAAAGAC  
TGTCCATTGGAAAAAGACAATCTCTTCAACAAATGGTTTTGTGAAAATT  
GGACAGCCACGTGCAGAAGAATGAAACTAGACCATTCTCTTACACCAGAC  
ACAAGGATAAACTCAGAATGGATGACAGATCTAAATCAAAAATCCACCAA  
AATACTAAAGGAGAATACAGGCAACAACTTTTTTTTACTTGGCCACAGCAA  
CTTCTTGCAAGACAAGGGAAACAAAAGCAAAAATAAACTATTGGGACTTC  
CTCAAGATAAAAGGCTTCTTTCTGCACAGCAAAGGAAACGACCAACAAAA  
CTAAAGGACAACCGACAGAATAGAAGAAGATATTCGCAAATGACATCAGA  
TAAAGGGCTGGTATCCAAGATCTATAAAGAACTTATTAACTCAACACCC  
AAGAAACAAACAACCCAGTGATGAAATGGGCAGAAGACACTAGCAGACAT  
TTCTCTAAAGAAGACATAGACATGGCCCACAAGCACATGAGAAAATGCTC  
CACATCACTTGCCATCAGGGAAATACAAATCAAAACCACAATGAGATACC  
ACCTCACACCAGTGAGAATGGGGAAAATTAACAAGACAGGAAACCACAAA  
TGTTGGAGAGGATGTGGAGAAAGGGGAACCTCTGCACTGCTGGTGGGAA  
TGTGAACTGGTGTAGTGACTCTGGAAAAGTGTGGAGGTTCCTCAAAGAGT  
TAAAAATAGACCTGCCCTACGACCCAGCGATTGCACTGCTGGGGATTTAC  
CCCAAAGATACAGATGCAGTGAAACGCCGGGACACCTGCACCCCAATGTT  
TATAGCAGCAATGGCCACAATAGCCAAACTGTGGGAGGAGCCTCAGTGTC  
CATTGAAAGAGATGGATAAAGAAGCTGTGGTATATATACATATATATATA  
TATATATATATACACACAATGGGATATTACTCAGCCATCAGAAAGGATGA  
ATACTTACCATTTGTTTTTGACGTGGATGGAAGTGGAGGGTATTACGCTGA  
GTGAAGTAAGTCAGTTGGAGAAGGACAATCATTATATGGTTTCAGTTATA  
TGTGGAATACAACAAATAGTGAAAAGAACTACAAGGGAAAGGCAGGAAAC  
TGAGTGGGGAAAAATTAGAGAGGGAGACAAACCATGAGAGACTCCTAACT  
CTGGGAAACAAACAAAGGGTAGTGGAAGGGAGGTGGGGAGGGGGATGGG  
GTGACTGGGTGACAGGCACTGAGGAAGGCACTTGATGGGATGAGCACTGG  
GTGTTATACTGTGTGCTGACAAATTGAATTTAAATAAAAAATTTTTAAAA  
AAGAACAAAATTGAATCGAACATCTTATGTTCTTCTTAAATCACTAATG  
TATTAATATTTTATTTTTTTTAAAGATTTATTTATTTGAGAGGAAGAGAG  
GGAGAGCACAGAAGGAGAGGGAGACAGATAAGCAGACTCCATGCTGAACA  
CAAAACCCAATGTGGGGCTTCATTCCAGGACCCCAAGATCATGACCTGAG  
CCAAAGGCAGACACTTAACCAACTGAGCCACCCAGATGCCCTGATGTACT  
AATATTTTCAACAAAACAGGCATGAAGGGCTATCAGAAAGTAAAGTTACT  
AATTGCTATTAATGTCAAAATGAGTGGGAAGCACTTTTTTATGAATGCCC  
TTTTTATTTCCAAAGTATATGTGCCTTCCATATATGTGTTTGTGTGTATAG  
ATGCATATATAGTGCAGGTGTGTGTGTGTATATATGTATATATATCTC  
CTTTTCCATTTTTCCATCTCATATGAGTAACAATAAATAATAAAGGT  
AGAAGGTAAATCTGTTTCAGAGTATATATTCACATATATATGTATTATA  
TCTCTCTTGGGCAACAATCTGTTTATTTGTCAAGTGTGTTTTTCTGTT  
TGTTTTTCTGAGAAGTAGAAAAAGAACTTCTGGTCAATGATTCAATCTTT  
TTTCTGGTTTTTCTGTACTCAGAGGAAAAAAATTGTAATTTCAAACATAA  
GAGCAATTAAAGTTATAATACTCTCTTAAACTTGAAATTATTGATTGGAG  
ATCTCCAGTTTGGAGAAAAGAGCATGCTAATTATGTATTTTTTACATAATG  
AAATTATAAAAAAGAGTATTTTTATAAGTAAAAAATGAACTGCTTTTCC  
ACTTATACCAATATGTAAGGCTTTAAATATATGTACCAGATTGATAATTA  
AAATCCTAGTGATATGGCAAGGCAATTTTTTTTTTTGCAAGGCAATTTTTTG

AACTTGAGTAATATAAACCATTTTCATTAGGAGTTGCATTATAACCTGCAG  
AGTGGGAAAAACCAATTAGATGCAGAAACCTTGTCTTCTAGTGGTTACCT  
AGTTGCATTTTGCATAAACTCTGGTGAGCAGAGAGTCCTGAGCAATGGGT  
AGTATTAACAGTTATGGCTCATTTCCCTTTTTAGTCACATCTACGAGGGT  
TCTAAAAATGAAGTCTTTAAATTAATTATAAATGCAGAGGCCGGATATTT  
AAAACCTCTTAAGAGCAAAGGTATTTTCAATTACTTCAGACTTAAACATT  
TTGTAAAATATACTGATATGAGACATATTCCACTAATTTAATATTCCTCT  
ATTTTCCTGTTAAGTGAGCACTGTGAGCAGTAGAGATAAAGATTACTTTA  
ATTAAGTGTGCAATGAATCCCATAAAACCTTAATTGAACACTTTATTTTCA  
CATATATATTTTCTCTTACGCAAATGTTTTTCAGCCATGCTGTATACAAT  
TATCTTAAAGCTAATCCTTCAAAGAATAAGCAAAAAATTTAAGACAATTC  
AATGCTTTCAAATTCCTTATGGCATTAGGGAGTGACCTTTAGATTCTGAA  
AAGGTGAATGTTTTACATTTCTTTAAGCTGACAGGATAAACATAGACATA  
CATTTAAGTCAAATCAGTGTTTAGAATAGCCACAGCTATCTTGGTGAATG  
CAGAAATAATGACTTCTCTGGATTTTGCAAACACTGAATTACTATTACC  
AATGGTCATCCACTAGGTTGCTCCCCAGGGCACCTAATTTTGCCTAAATG  
CTGTTTTTCAGAGGACTTAAAAATATCCACTTGACAGCCAATCCCTATACAC  
AGCTGCCATTCACTTTGATATGTCATCATGTAATTACACTCATTCTTTCA  
AAGTATTCAGAACTCCCAGAGCAAATCCTACAGTTGTTGGAGCTTTGGT  
AGTCCAGAGAGGCTTACTGGCACACAATACAAAGAGTCTGAGCCTGCCCT  
TCAGCTTCCCCCTTCTCCTTCAGACCCAGCAATTGGCAAGATGACACCT  
CACTGCAACCAAGAAAATGACTATAGATTCCAGGCACTTTGGTTGTTTCA  
AGCAAGTCCTAGCATAATTGGTTACGGCAAACCCCAGACATAGGACCAA  
TGCATGTTTTCCATAAATTCTCCCTGGAAATAGCACCAGCTTGAAGCACTG  
AAGTATGAACAGTGTGAGGTCTGGATTCACCCAGCAGTTGCTCTGCAGAG  
AGGACAAAAGGCTGAATGGAAGACCTGACAACCAGCAAGTCTGAGTAGGA  
AAGGCCTATGTAAGACCCATAACCCAAACTCAAAGCATAAAACGTCTTCA  
CTCCCCCTCGTTCTGGGGAGGAGGAATTCATCCAAAGGAGGATAAAACAAA  
AGTGCTCTGTTGAATTGGTTGTGTCAGTGCTTCTATGCCAGATGTCTTTTT  
GTGATTGAAAAAACAGCAGGGACACATTCAGTGGCCCTTTAACATTTCTT  
TGCAAAATCCTCCTCTGATTTACCTCTCTACCTTGAATATGTATAAATCA  
ACTTAAATTTATTTTATTACATAAATAACACGTTTCAGCAAAAATATTTCA  
GAAACATAAATAGAAAGGAAATTAATTTTCTTGGAAAGTCACCATTAC  
CAAGAAATATTGTTGTTAATATTTTGGTGTATCATTCCAGATCTATATAC  
AACTTCATTTTAAAGGCTGCGTATTATCCCATTGTGTGAATATAACCAA  
TTTTTTTTTTAAGATTTTATTTATTTATGAGAGACACACAGAGAGAGAGG  
CAGAGACACAGGAAGAGGGGAGAAGCAGGCTCTATGTAAGGAGCCCAACGT  
GGGACTTGATCCCAAGTCTCCAGGATCACACCCTGGGCCAAAGGTGGTGC  
TAAACCATTGAGCCACCGGGGCTGCCCGGATATAACCAAATTACAGCATA  
TCCAGTTCTAAGATATTTGGTCTTTTATTGTCTTTTACTATTATAAAAAG  
AGGTGGAATAAATATTTTAAATAAAATAAAAGAATTCTCCACTAAATGCAT  
ATTTATTATATCCAGATGAAACAAGGTACTGGTTCATGAAGTCTGTTGT  
TTCGAAC TGATGGCTAGTTATTTTGGAAATTCTAATTTAAAGAGATTTT  
ATGTCATTAATTATATATACTGGTGTTCCAAATATCGTAATTTAAATTCC  
AACACATTGGGACGCTTGGGTGGCTCAGTGGTTGAGCAGCTGCCTTTGGC  
TCAGGGCCTGATCCCGGAGTCCCAGGATTGAGTGCCATATGGGGCACCTT  
CCATGGAGCCTGTCTCTCCTGTCTCTGCCTCTCTCTCTCTCTCTCTCTCT  
GTGTCTCTCATGAATAAGTGAATAAAATCTTTAAAAAATAAATAAATAA  
TTGCCAACACATGACATAGTGTAGGAGCATGCAAGAGCACACACACACAC  
ACACACGCGCGTGCGCGTGTGGCAACCTACCCTTTACCCCTTTGTCT  
TTCTTGCTTTCTTTGACTCTCTTCATTCTAACAACCTTTTCTGTCCACTTT  
TCTTCTTGCCAGCCCCCATTTTCTGTCTCTTCTACCATCTTTTA  
ACCCATCTTTCTGTCCACCATCTTTTCATGTTAAATGTCTATCCATTTATC  
TACTTATCTTTCTTACATTCAACACATATTTTCAGCATTTACTGTTTGCTA  
GGAGTTTGGCGCATTTGTTGTGATGGGTAATTAAAGAAATATTTTAACT  
CTTCAAATGGCTTTATAAATAAATGTCATCCTAAGAATGGATTGTTTTCC  
CTCTTGGTTTTACATTTGGGTGAATATCAGCATGAGTGAGGAAACATTAAA  
TACAAAAATAATTAGATCCTAAGACACTTTTTCTATGTTGGGTCATCTAT

TCCTCTTGGTTAGAAGAATTAGATTTATTCAGTTTTTTTTTTTGTTCCTGT  
CTTTCACATTTTTTATATTTTGTGTATCTTTAATTTCTGAATTAACCAGTT  
CAGAGTACATTAATTGTATGTCGTTGGTACAGTCTAAACAAAGAATTTT  
CCTAATTTTATTTAAAGCTTTTCAAATCTCACTGAAACAAAATAATATG  
AAAAAGAACAAATATTTAAATGATTATAATGTAAAATTAATGATTATAA  
TGTAAGTGAGTTTTGAATCTGATTCCTCAAGCACCTATGATCTATTTCTT  
TAAAAAAGAAATCCCTCTGGCACAAGTTCACAGAGTAGTCTAATTATTT  
TGCCTGAGAGACGTGCTTGTGTGAACACATTTGGTTTAAATCAAATATGT  
GACTTTATAGTACAGTGTGGGTGGAGTATTCATGGTATAGTTTTGTTTAA  
AACTCAATTTTTGAAGAAAAAACTTACTCGAATGAACCATATTCTGTTG  
GTCTTTGTCAACATGATTTACATGGATTTCATCATCTTTTCTCACTCACAA  
ATTTCTCTCTGTAACCCCTCTGCTCATTCTTTGCTATAACTCTAGGAAGAA  
GACTATTCTTATCTGACAAACACCAGCATGTAAAAAGCTAAGTTACAGAA  
ACCAAGAATGAAAGTGCCAAAGATGAATAGAGTGTTGAAATCAAATAGCA  
GGATCAAGGCATTAAATACAGAGACAATGGAAAATATATCATTATTTTGA  
GATAAACTTCAAGTTCTCTTCATCTAAGGAACCCCTGGGAATAGGACTTTA  
AAATATAATATCAGAAATAATGATAAAAAAACCCCTTAAGGCATTTTTTTT  
TAATTTTTTATTTATGATAGTCACACAGAGAGAGAGAGAGAGAGAGAGA  
GAGAGAGGCAGAGACACAGGCAGAGGGAGAAGCAGGCTCCATGCACCGGG  
AGCCCGACGTGGGACTCGATCCCGGGTCTCCAGGATCGCGCCCTGGGCCA  
AAGGCAGGCGCCAAACCGCTGCGCCACCCAGGGATCCCCCTTAAGGCATT  
TTAATATTGAAATTTTTATTGCCATATCTAGAGAACTGTAATAGATATATT  
AAAACTACTGTATATTCTATTAAATCTGAAGAAAATGCCTCTGATTTAGT  
ACCTGATTGAGTGGGAGGAAATCAATGGACATAATTTTAGGAGAAATATT  
TTACCAAATGTAATTAAAAAATATTTACCAGTTTGCTTATTAAGTGATGG  
AGGAATATTTTCCAAAACAGGCAAATTTGAAGTCTTCCTTGATTATTTGC  
ATAAACTGCAAAGCTGCTGCATGAAGGCTGTATTCAAAGTCACAAAGTC  
TCCTGTCTGTGTAGTTCTTGAAAACGCGGTCTTTAGTGCGCTGATGGCCG  
AGTTCCAAAGGTAACACAGGCATGCTCTACCATAATTCACACACAAAAA  
ATGGTGCTTGATAGAATTTCTAAGGTTTCTATTTAAAGTCAGGAATGC  
AGTCAATAGGGTGTAGAATATTCAGAGAAATATGGCTAAATTAATAACA  
GCTTCTAAAACAGTTATCTGGGGCTCCCCCTTGGGCCTTTGAAGAAAGAGA  
GATTAGTCTTCATGAAATTCCCCAGAGGCCCTTCCCCGTGGTCTACTTT  
GGGAGGGAGGGGCTGTGTCCCAAGACAAGTACGGAGCAGGGTGGCTGGCA  
GCCACCATGAGGATGGACGGGAAGGCTGCACGCGGAAAGCAGGGTGGACA  
GCAACGAGGCGTTTGCAACATGATGATGTCTAGTGAGGGTTGCTTGTGAT  
AGAAAAGACAAATATGGGAGAAATACATAGAAAAAAGTAAGGAGACTTAA  
GGACAGATTTACAAATTAAGGGTAGTAATGTTTAAAGAAGTTTTTGAAG  
TTTCTGGGCTGGGATGTTAGAAAAACCAGTCCAGAGGGGAAATAGTAGTGT  
TGTCTTACCCTTCCATCTGGATGTGTGTGAGTGTGTTAAGATTTTCAT  
TTATTTATTTATTTTTTTGAGAGAGAGTTGAGCATGAGTGGGAGGAGGG  
CACAGGGAGAGGGACAAGCAAGAGCCCAATGTAGGGCTCAATCCCAGGAT  
CCCAAGATCATGACCTGAGCTGAAGTCAGAAGCTTAACTGACTGAGCCAG  
GCACCTGGATGTGTTCTAATCAGAGACCCCCCAAGGCCCTGTACATTA  
AACACAGTGGCTTTGCAGATTAAGTGTATGACCATCATAGAAAATTAAC  
ATGAGGGAGTAGATGCTACTACGCAAAATCCTGGCGTGTAACAAGGAGAG  
CAAAGAAACAAGAATAGCTTCTGCAAACTCCCCCTAGCAAATGGAGGTG  
GTTTGATATGGAGAAAATGAAGGTTAGAAAAATTGAAGGTAAACAAGAA  
AGGGCTTTTGCTCAGGAAGCAAAGAATAGAAGCCATTACTTCTTATGTCT  
ACTCTGCATGCTAAGAGGGTCTTAGTCACTGCTGTAGGTCTTGCATATAG  
CAAAATACCTAGAACTAAAAAGAGTTAAACAAATGTTTGCTAGAGATAA  
TAGGAAGGAAAGAAGATAAAAAAGGAAGAAAGGAAAGAATACAGGAAGGAA  
GAAAGGCAGTCAGCAAGTGGGGGAAACAGATGAAACTAGAATGAGTTAAC  
CTATTAAATGTCTCATTTTTTATGTAAAATGGGAATATTGAAGGTTGTAAGA  
GATAACACATGGAAAGTGCTTACTATAGTGTCTGGTGTAATGGAAGTGCT  
CCAGAAATGCTAGATATTGTCATCCTTGTATCATCACCCTCATCACTAC  
CATTATCCCTTACGGCAGAAATGCTTTGCTTGGCCATGACCTACTAACAC  
ATAGTGATAATCCTCCTTCTCACATTTCAACATACTTTAACTTCCAACCTC

CTGACACTCCAAGAAATTCACCTCTGCCAAATTTACTGTATAACACCTTTGTG  
TGAAAAATCCAGAGAACAGTTTCTTACCTGACTTCACTGCAGCACTTATC  
ATTACTGATGAATTCTTAATTTTGGGAAGCCCTCTGCCTCTCTGGCTTTTG  
TTCTTCTCTTTGCCTTCAGCCATTACTCAGTGTCTTCTCTGAGCTGCTTAT  
CCTGGCCTCACAACTTGAGGGTTGGGATTCTCCAGGTTCAAGAACAAACA  
AAAGTCAAACATGTTCTTAAATTTAATTCATTTTCCAGAGAATAGAGAA  
AATGACATAATAGTCAATATTAGTCTGCAGACCAGATTGTAGAAAAAAAT  
TATTCTGCATATGTTAATGGTCCACATAGAAGGCATAGCTTATTTTTCCA  
TCCTGCATCAAATATATTTTTTACAAATGAAATGATAAGAATTTGGTTTT  
TCTAAAAGTGATACATCAAAGAAATACCTTTCTCAATCAGGTATAGTCA  
TCATTCTGGGTGGCACTTGAATTTTTCAAATGCCCATGCTATCCTTCAC  
AGTTTAAAGAAGTACTTGATGATGAGCTAGAGGCAAGTACATGCATCTTAT  
TCTGAGTTTTTAAATCCATTACTATCAACCCTTAGAAATAAATCTATAAA  
TTCTATAATACTTGCATAGTGCATATTTTAACTTTGCTTTTATAGTCAGT  
TTTCTCATATTTATTTATTTTAGAATACTAATTGCAAAGTAATACTAATA  
AAAAATATCAAAAAGATTATAGTTAACCTGGGGAAAAATACAAGAGATTT  
ATCAAGTAACAAAACATGTTTTTCAGCATCTTCGGTGTTAATCCAATGAAA  
TTCAGTGAGTCTAGGCTTCAAATGCATACACATATGGCACAAGTGAACCA  
ACCCAATTTGTACTGACAAGAACAGGTGTCTGTAGGTAGGTCATTGAAAG  
TCATCATAAACTGGAACAGGTTTACTAGTACATAAATCTTAATTTGTAGA  
TACTTGTTTTACAAGATAGCGATAGGCACATTATAGACTCTATGTATAGA  
TGGGGGACTTGTGCCATGTTCTGAACCATAGGGCATGAGGTTACCTTG  
CACAATATGGTTTATCAAGCCGTTAGCAGACGCATTTTCATTGTGAGAAAT  
CCTTAAGCTGTTCTCTGGAGAAGTTGATGTTTCTAACATCTATAGGTATC  
CCATATGGCATAGATAAGGAGATAATTATGAAAAGATGCAGGTTATCATA  
GGGAAAATTTCTCTTACGTTATTTTGCCTAAATCTAGAAAATCTGAGTTT  
ACCTCTAGACCACCAGAGCCTGGGAAAATATAGTTTGTCTTTCTGAAAGAGA  
ATTAAAGAACTCCTTATAAGAAAGGCCCTAACCGTACAGCATAAAAAGAA  
AGAAAAATGTATGTCATCCCTTGGTTATGATTTCTCTGCTTAACTTGCAC  
AGATAAAATGTCAGCCAGCCCCATTATCATCCAGTCAAATCTTCAAACCA  
CACCACCTTCTCTTCATAATATCTCTCACTTCAGGTTCTCTGATATCTTG  
AGTGGCCCATTGCCATCGTTTCTCTGCTCCAACCTGAGCCTGTGCAACTCA  
GCCATAAAATTATACCCCCAAATGCAGTTTTAGATAGATAAAATTTCTCAG  
AAAAATTATTTAAATGACCCTCTCTTACTTCTAGGATCAACTTCTAAGTA  
TTTACTCTGGCTTCCTTCAATACTCAGTCAAATGTGGCTTCGATCACTCT  
CCTTTAACTTCTTTCTCAAATAATCTTCTCTATACTCAAATAAACAAA  
CAAAAAAGCAGAATCAGACCTATAAGCACAGAAAACAAACTGAGGTTGCC  
AGAGGGGAGGCAGTGGGGGATGAACAAAATGGGTAAAAGGGAGACAGAGG  
CTTCCAGTTGTGGAATGAAGAAGTGAGGAGAATAAAGCACAGCTAGGAAT  
CAGTCAGTGATACTGTAAGGGCACGTGTGGTGACAGATGGCAGCTACAC  
TGTGTAAGCATAGCATGGATAGAGGATTTGAATCATGATGTTGTACACCT  
GAAACAAATGTAGCATGGTGTGTCTACTATTCTCAAATAAAAGAAGAAAA  
AACTCCCCTCAAACCTACCAAAGCCTCTGGCCCAGTGAAATGGAATTGGT  
TATCATCTCTATGCCTTTACTGGCCTGAACTTCCCTTTGTTTGTTTTTT  
TCCTAACTTTTTTGAACAAACCCAGGATCACATCTTACAGAAATCTTTT  
CTGACGTGCTTCCTAATCAGCCCCCACTCTGTGCTCCCTTTCCACTCTGA  
GCCTAACATGCATTGCACTGAACTGTAACCACCGATTTTATTTCTCTTGA  
AAGAGATCTGATTCTGTGTCCCATTCAACTTTGCATTGGAAGTGCTTTAC  
CCAGGCCCAGGTGTGAAGACAAACTGGGAATTCAGCAGATGTTTAAAGT  
CAGTGATTAGGCCAATTAACAATTTGCCCCCTCCCCAACAAAAAGTGTG  
TGTGTGTGTGTGTGTGTGTGTGTGTGCACGTGTGCATTTGGCACACACA  
CCTAGAGAATTTAAATTAAGTTATTTTGATTATATGTGATATAAATAGCCT  
TGCAAATAAATAAAAATAGTGACTGGGATACCTGGGTGGTTTCACTTGGTTA  
AATGTCTGCTTTTGGCTCAGGTCATGATCCCAGGGCCCTAGGATCGATCC  
CCCCGTGGGGCTCTCTGTTTCGGCAGGGAGTCTGCTTCTCCCTCTCTCTCT  
GCCTCTCTCCCCACCCTGCTCCGCTCACGCATGCTCTCTCTCAAATAAA  
TAAAGCTTTTTTTTAAAAATAAAATAAGTGGTGATTACCAAAAAGAGAGGT  
ATTTAAAAAAAAGCTCTCTACTTGTCTTTGGGTTTTATTTTTTTTATTTAT

TTTTTAAGATTTTCATTTATTTATTTATTCATGAGAGACACAGACAGAGAGAGGG  
GCAGAGACACAGGCAGAGGGAGAAGCAGGTTCCATGTAGGGAGCCTGATG  
TGGGACTCGATCCTGGGACAACCTGGGCTGAAGGCAGCGCTAAACCGCTG  
AGCCACCCAGGGATCCCCGTCTTTGGGTTTTAAAATGGTGCTGTCATCA  
GTAGTACTGGCAAAGCCAGGCTCAGAAATAAACTGTGAGAAGCACTAGGT  
AAGAGAACAGCTATACTTACTGAGGGCGGACTATGTGCTAAGGATGGTTC  
TAAGTGTTTTACAAGTAGTAACCTCCTCTATTATACACAGTGATCCACAG  
CGTAGACTGATCATGGTGTGGGGTTGTACTACTGGATTGCATAAAGGCAC  
GTGGCAGAGAGTGGGCGTAGGGGCTACAATTCCACCCTCATTTCAGCGCAT  
CTTGTCCTTGCCCTTGGCATGGGAATGAAGGAGTTCCTATTTCTTCACACA  
AAGACGCCTTTAGGTTGCAAAGTTAATAGGCAACTGTCTTTTTCCAAATT  
CACACAAAGCGACAGCATAAGCAAGTGGCATCCCTGGGGGTAGGCGCTAT  
TATTATTTCCCATCTTACAGATAAGGATATGGAGACACAAGGAAGTTAAGG  
AATCTGCCAAAGGTACACGATGGATAGGTGACAGTGACGAGATAGGTACA  
AACCAGTCTCCTGGCTCCAGGGTCTGCACCTGTTAGCACTGTGATATCT  
GCTTTTCTGTTACATGTTTGAAATGCTTTCTCCAATCTGGTTGACATTCT  
TGAATTTTACATTAACCTCACTTAATCCTCACAATAACCCCTAAGGAACTG  
GCCCCTTAGGACACACGGCTATGCCTCGGGCTCTAATCCTAAGAGATGGT  
CCTTTGTGAGCAAGGCTGTGTCTTGGTGGAACAGAGCCAAAGAGACACT  
TCAGTGATCAGAACTAATTGGCTAATTGATATGCTTCAGACATCTTGCCA  
AGCAAAAGAGAGTTTAATTA AAAACAAAATATTATTGGTAGTACTGGGGGT  
TAAATTGGTGGGGCCTGAGAAATGTTGTTAGACCTGAAATTAATAGATAT  
CAAGAAAGTCCCAACAATATGTTTATAGGTTATTGTTATTGGGAGGGAGG  
CCACTACATAAAGCAAAGTCACAAAGAATTGGATTTGCAAATGCAAATG  
CAGTTGAATATTAGATTACGTGCAGTATCTCATGTTAGAAAGGAAGGGAA  
GGATTGCTCAGTAGATAATACTGAGACAACCTGGATTAGCATTTAAAAAAT  
AAAACCTGCATCCTCACCTATGTATGAAATGACTTATATGCTAGATTATTT  
AAGGTAGTAAATTTTTTGACAACAGAATTTAGGCATACCCTAAATGAGTT  
GATAAATATGCTATAATCTTACAATGAACACTTTAATTTAAAATGCTGTT  
TCATTTTTTTATTTGCATATAAAAACGCTTTTTTCCAGTTTTATTGAGGTATA  
ACTGACAAAAACTGTACATATTTAAGGTGTATAGTGTGATGATTTGATAT  
ACCTACATATTAAAAACACGTTTTTTTTTAAAGATTTTATTTATTTATTCA  
TGAGAGACACACACAGAGAGAGAGAGAGAGAGAGAGAGAGAGAGAGAGGC  
AGAGACGCAGGCAGAGGGAGAAGCAGGCTCCATGCAGTGAGCCTGACGTG  
GGACTCGATCCTGGGACTCCAGGATCACGCCCTGAGCTGAAGGCAGACGC  
TCAACTGCTGAGCCACCCAGGCATTCCACATTGTTTCTTTTTTAAAACAAA  
ATAAAAACCAAAAAGCTCTATATAAACATTTTTTATTTTGCTTGTTTATG  
AAAGAAACCTATCTCTAGAAGAATATATAAGACATCAACAAATTTTTTTA  
TTTCTGGGTAAGGACACTGGTAGCGACGGCACACAAGTAGGGGGAAAACCT  
TCATTGCTTTACACACTTTGCGCCATGTACTATATTACCTATTCAAACAA  
TTCAACTAAAAATATAAAAACAAAACAAAAAAAAGATCTTAGTTTGACTC  
CCAGAGCTTGTACTTAGTGAACCTTGGGCTAGTTTATTCAATTGTCACAG  
ACTCATTATCTTTTTTGTAAGATGGTGATTATAATCCTTCTCATTGTTT  
TATGAGATTTAAATAAGATAATATATGAAAGCATCCTACTACAGAACCTG  
ATATATAATAGACAAAATACTAGATCTTGTTTTTCATCACTTCCCTTTTGC  
AGAGGACACAAACTCAGTGGCTAATGATTCATGCAGTCAATAGAAATGTG  
TGAAATGGGTTGAATGTAGGAGATTAGGTGGTGATAGGGACTGATAAATT  
AAAGGTACTCATTATTATCCATGTGTACATCAAAGTATAAATTATACATA  
TGTATGTACAATACGTATATGAGGTCTGCTGGCTATTCTCATTTTGCTTT  
TCTATGGGTATCTGCATTTTACAAAATTATGTGAAAATACAATATGTGTT  
TCAAACCACTGAAAAATCATTTCAGCTGTATCACACTGATGTTAAAATTA  
AAATACGTTTTCAAGTAGGTCTCCAATAGTAACTTTCTCTGAGTTGAGTTA  
TTTAATATTATTAAAGCTTTAGTTTTTTCACAGAAAAAAAAAAAAAAAAAAG  
GTCCATAGGATACACAGCTAACTGATTGCCAGACCATAACTGGGAGGTTA  
AAGCAAAGGATGCCTCTGACACCTTGGCTATTCCCTCTCTGTGACAGATTT  
GATGGAGAGAGTGCTGCTGCTTACAGCTAATAAATCTGATTGAGGTAGGA  
GTCAGGCGGAGGTGACACAGTGAAGCCAAGTCAGGAGGTCAATAATAGCA  
AAATCACTCACAGGTGGGCGGGATAATGGTCAAAGGCTACAGGAGAAGAA

TTTCAGGTACCATGTTTCAGATTTAGGGTAGGGATGATTTAGGGTAGGGAT  
GCCATCATTACTATTACTTGTGTCCTAACAACTCACTGTTTTGAATAAG  
TCAAGGTTAAAGAAACAATAGAGCAGTAAGTAAATTAACACTAGTTCACA  
ATTCTCTGGGGAGCTGCATATTCTCTGGGCAGAAGCTAGATACAGTTCA  
TAATATATATGGATTTGATATCTTTACAAATATGTATACTCTCTGAAAA  
CTAGGCACATCATCCATTAATTTTGATAACTAAATTAATTTCTAAAAGTA  
AATTAAGACCTGCATAGACTAAAGTTACTAATCAATATTTGTGAACCAGT  
CTAGAATCAGAACCACCGGAGACATAGACCAAATGGGAAACAAAGCATTT  
CACAACTATTTTTTATTACTTATTCTGTGCAAACACCTTCCTAAACCTT  
CCATGCTAGAAATGATGCAGGGTCCCTGGCCTTGTGCTATGGGAAGTCCC  
CTCCAATTACATTGTGTTTCTTTAGTGAAGAAGACTGGAGGAATTCTTGC  
TACATAAATGTACACATACTTGCCAACGAAAAGTTCTCCTAAGACCATC  
CTAATGGCATGGCATTTTCTTTCCCTCTCTTTGGAATGAGCCCAAGTAAAGA  
AAATCTGATCGTGCCACATGCAAAGGCTCTCATACCTCCCTGATATAAAG  
ACACCACTTTAAACACAGTTGGCTGTTTTCTCCCAATTATTTTTTTTCAGA  
GAGTTTCTATTTCCAATAATAGTGCTAGTCTAGAGACTGTTTGGCTCCTA  
TCTGGGAAGAACAGCTTTATATTGCCTTTACCCCTGGGATAGGATTCCCA  
GTGTTCCAATTTGCTTAATGATAATGGATCACTCTAAAAATATTCCTGATT  
TCACTTCCCCTCCCATCCTTCCCTGTAACCTCTCTCTAAGTGATTTTCGGA  
TGCAATTTCTTCTACCTATCACCTACCATGGTGCTTTTAAACCAAGGAAC  
AACCAGTAAAATTAATGCAGAAAATACAAAATGCCTTTGATGCACTCCAT  
CTTCCCTCTCTGTGTTCCCTAAGCTCTTGTGGAAATCAGCCTCTACCATT  
TTGCATTGAAAGTCTCCAAACATATGTTTGTCTCATTATCAGGATGTAAA  
ACCACCTTGAGGACTATTTTTCTTCATCTCTCTAGCCCAAGCCTCTAGCT  
CTGTGCTGACATAATGTAGGTGGAAAAATCATTTTTGATCCAAAGGGAAC  
TGAACTTAAAAGAGATTATTACTCTCTTTAAAGGAAATATATATTTTTCT  
ATCTTTTGTACTCAACCACTGTAGAATTTGTCATCTACATCTAGAACACT  
TATTAaaaaatAGAACTATGTTTAAATCAAGCACCAGTTAACTGAAAAA  
AAAAGTTAAATTAACAGGAAATTGAGAATTAATAATGACAAATTGCTTG  
GAACATATTAATAGGCATTAATGTGTTATTTATTCTTTATTTAGAAAGTAG  
GAATTATGAATGACTGACTACAGAAAGATATTTAAAGGCTCTGTTTTTT  
TTTTCTTAATGGAATAAATTTGGTCAACATAATTCACCCATTCTTTTCAT  
CATTCACTTGCCATGCAACATAATCAGAGCTCTAGATCACTTTGGGCATG  
TGAAGATTCAAAAACAATATAAATTTCTCTTTTCAAGGATATTATGAAGT  
ATGCACAGAATATGGAGCAATTTGAGTCAGCCACTAAAATTAAGTCTTC  
CACAGAAGATAGACACAGAGAAATAATAATTTGTTCCCTGTTTACAAGAAT  
AAACTTCTAGGGGCTCCTGGGTGGCTCAGTTGGTTAAGTGTTTGCCTTCT  
GCTCAGATCGAGCCCCTGCTTTGGGCTCCCTGCTCAGCAGGGAGCCTGCT  
TCTCTTCTCCTTCTCCCTCTGCTGCTCCCCTTGTTTGTGCTCTGTGTCAA  
ATAAATAAATACAATGTTTAAAAAAAAGAATAAACTTCTAAATAGAAAGA  
AAATCCCAGTCCATTGGCTGAACACAATGGGTCTGTTAAGTAGGAGCATG  
TATGATTAAGACACAAAGTTGTCACTTCCCTTGAGATAAGATGCTTTACAA  
TAAAGTCAGCTTTACTGTCAAGCTTAGAACACACAAAACAGGCATAAGAT  
ATAAGTTAATATGTTTTTGAGGTAAGCCTTTATTACCAGAAGAAAAGAAA  
AAGTGAAATAATTCTCAGTAAAATTAACAACCAAGTGTTTCTTTGTGTCAG  
GGCCCTAACACTTGTTAAATAATCCTTTGTGTACTAACAAATTATTAGGG  
TTCTCTGTGTTCTGTAATAGTGAATTTTAGTGGCTGAACCAAAGTGTTC  
ACAAGGCAATACAGACCCGTGACTCATCTAAGAATGGAAAATTTATTTTG  
TTTTTTAACCATTTTCAGTCCCAAAATGAGCTGGAGTACTGGTTATATTAC  
ATAAGAAGTGAATTACGTTTATCAATTTTCTTTCTTTTCTTTTAAAG  
ATTTTATTTTATTTATTCATAGAGACAGAGAGAGAGGAGAGAGAGAAGCA  
GGCATCATACAGAGACCCGACATGGAATTCGATCCAGGGCCTCCAGGAT  
CACGCCCTGGGCTGCAGGCGGCGCTAAACTGCTTTGCCACCGGGGCTGCC  
CTATCAATTTTTATTTAGTAAGAAGACCACATTTAGGATGATGACATCTG  
TTGCTCTTTTATAAACCGAGTTTAATGTGCTAATTCTTAGCCCCGATTG  
TCCTACTTTGGGATAATTTTTTAATTTACTTTAAAAACCACTTGGTATTTT  
TATGAGACATTTATATTTTATCAGTATATCAGCACCTGACACGAGAGAC  
ATTCAATAAATGTTTGTTTTTTAGAAAATTAAAAAAAAGACTTACACAG

TGTTTATACTATGCCAGGCATATTTCTAAGCACTTTAAATATACTAATCT  
ATTCAATTTTTCCTACTATGATGAGAAAGATCAATTTTTCTTCTGTAGAAATG  
TGGACACTGAGGTACAAAGATTGAGTAAGTTGCCCAGGTTTACACAGCCA  
GTAAGGGGCGAGAACCAGGATCTGAACTGAAGCAGTATAGCTTCAGAGAGA  
GTCCATGTTCTTACTGACTATCCGATGGTCCCCTTTTTTTAAAAAAGATT  
TTATTTATTTATTTGGCAGAAAGAGAGAGAGTGTGTGTGTGAGTGCCAGA  
GAGAACAAGGGGAACAGAATAGGGGGAGGGAGAAGCTGGCTCCCTGTGGA  
GCAGAGAACCCACGTGGGGCTTGATCCTAGAACCCTGGGATCATGACCT  
GAGCTGAGAGCAGCCTCTTAACTGACTGAACCACCTAGGCACCCCTATGT  
TCCCTTTCTGTAGTCCCATGGCTCAGAGTTATCGGGATAGTATTAAATTA  
TTACAATAACTCGGTTCAAAAAATGATCATTTCCTTCACCTTTCAAATGTT  
TCATCACCAATTTTGCTGCAATAATAAATTTGCATTTCATGGCAAAGTGTA  
GTTCCCCAATCTACATTAATATCTTAAATTGACTACTTTACGTTTAGTTA  
AAAAAATTAGCAGTTATTTATTTGCTAGATTTGTCTATGATTTTATATAC  
ATACACAATACACAGTCCATAAAACAATCTTTGAAGAAAAGGCAACAAATT  
TTGAGACAAAACATAATATAGACAATAATGATGATGGAACCAAGGAGCAAC  
CAATAATATTTTCTAAATCTATCTGCCTTGTGGCAGTAAAGGAGTCAATA  
AACACCTTTTTTAATAAAAAAGAAAACTTTTCTTTGAAGGATTGCATATTG  
CCCTTGAAGCAAGCTATGGATTTAAAAAGTTTAAGACAGCTTTTAGCACT  
CTTTTGAGGAAATACTGCATTTCTAAGGATGGCAGGAACCATGTGCTCCA  
AATAATACTAGTAAATGTTAGCTGCAACACCGTTCCATTTATATGGGATG  
TCATAAACCCAATGGAATGTTGGGAGAGTACTCAAGCATTCCTTCTAAGCA  
TGAATTCCCAAGTTGCACAATAATGCTAAGCAGCAGCATCCTAAACATAT  
GCTGTTGTTCTAGATCTCGGTTTCTGTTTATGACAGCAACGATGGTACTA  
ATGCTGGACATCTTCTAGGAGAAGGAGTTAGCATTCCTAAATCCCAGGGAC  
TCTTGATAGTTGTTTATCCCTGAGCTTCACCCCATGAGGAGTGACAATAT  
AATATGGGGAAAGGTCACTAACTGAAGAATCACGAGGGGAAGAACTCAATT  
GCAAGTTAATCAGCAACTGGTTTAGGCAAATCATTGTCTCTTTAGGCCT  
TGGTGTCTTAATGTGAATATTAATTTTCAATAGTTCATGGAATGCTGATT  
AGGATAAAATCTGACATCTGCATAAATGCTTTACAAAATAAATATGTTTT  
GTAAACAATAAATACACCAAAGCAGCTGAAGTATAAGATCACTTTATAAC  
ATTTCTGCCTTTTACCTCACTATGCTCATCTACTTTTATACTTACATATG  
ACTTTATTTGCTTCCAATCCCAGCTTTAGTCAGGAAAACCTAATTGTTCT  
CTCCACACAACCGCATCTTCAAGTCAATCCGCATGTATAACACGTTTTT  
GTTTTTCCTCTGTGTCATGCTGTACTTCTTTAGCCTTTCTAAAACTTCA  
CACAAAAGTCTATTTTGTAAAAGAAGTCCTCTCTAATTAAGCAGATGTAT  
TTATTATGCCATAATTTTTGCTGTGTCCAATGATGTACAACACATGCAGA  
CACAGGCACATGGACACACACACTATATTTATTTCTTATGCAATCATA  
CATGAATGTAGTGGTTTCCCTTTAGGGATCTAAACACAGTACTTCGTCAA  
CTTTCTTTACTCCAAATGAACTCACAAAGTAGAAAGTTGTAATTCAGAAGC  
CATTAATGAAAGAGTCCAGAAGCAGGAGGAGAGAAGAGAGGGAAGAAAT  
GAGTGAGAAGAGATCTTAAATGAGCTCTTTTATCAGATACGTGTAAAAGG  
CAAAGTAGTCATCAAAGAGCTACAACCTGCTCAGACTCAGTGCGTTGGTT  
TTTCACTACCATCTGAGCCTTCTCATCACCGGGGAACAATCTCCAGCATA  
TATTAATTTAGAGAGCACCTAGCACCAATAGTAACATCAACTTGCAGC  
CTTTAGTGCTTTGCAGTTTTGAAAGGTTTTCTTACATACTATCACATACA  
CTGGTATCAATGTGAGAATAAACCAAGAGGAATGCTATCCTAGGTGAGGA  
AAAGATTTAACTATCACATGTTTCTTATTTATTTACCTGCAAATTGGGTT  
TTCTCCTGACAAATTTTGTAAGGCACCTATTGGCTTTAGGGCATCAGGC  
ATATGTTGAGTTGTTAGTTATGAGTTGTGTGAAGATGATAAAAAATTGTA  
TGATAATACATCTATTTAGGAGATGGGATTATAATTCAGTTACACTCTCG  
AGAAAACCTGAGTTGCAGACTCAATAGGTAATTTTAAAAATTATGCTGGAAA  
AAGAGCTAATATGACATAACTTCAGGCACTAGGATTCTAATTAAATTAAA  
TATAAACAGTTATTGAGGATTGCCAAGCCCCAATTACTAGACAAAGAGGC  
AACACACAGTCAAAATTTAGAGTGAGATGTATAAGTTTTGAGCACAAGCT  
TTCATTTTCATGAGGCCAGAATTTTATACAAAATAATAATCTTGCGCGAA  
TCGGAATAGCAAGTAGACCAATAAAACAAGGAAATGTCAACCCATACAGA  
TAATAATGAAGACATAAAATCTTCCATCCATAGAAGCTTATGGTAATTTT

TCCATTTAAAGGTGAAAAACCAAATGTTTTTTCATGTAACAGATTTTTTTT  
TCGTAAAATACCGTGTATGTAAAATTTATTAACTTTTAACGTGTTTACA  
CAGACATAGGAAGCTCAATTCAAAGGAAAAAACCTTAATATTCTTTTTAA  
AACTCAAACTTTTGGAAGTTGAATTTCTTGTTGTTGTTGTAAAATAAAAT  
GTACTGAAGCCCCAAATGCTCATAATATTTCAAACATATATTTCATTTAT  
CCTTTTCCCTGTGTCATAATTTTATTAGGTGCTCCCTTAGTATTTGGAGGT  
CAAATCCATGTGCTATCAATATACCAAGTTGGTACGTGGACCTTTCTGAA  
CTGTGCTCTTAAGGAGATCCAAAAATGCTTAAATGAATTAAAAAAATTA  
GTAATCAGAATGGAATAGAAAAAACAGTAAAAACAGCTGGTAGCATTCC  
AAAGAAAAGAAACCAAATGGAGTGAGACAGAAATCATGCAGAATCTTGAA  
TATAAAGACACAAACCTGAATTTATGTTGAATATAAAAAGCAAGGAATG  
AAAGAATAGCTGGAAAGTACATTATTGTGAATAGTGAAAAGAAGATATCCA  
TTTGGAATGAGGTAATTTTAAGAGAATACATTTCAAAAAATATAAGAAAT  
ATATTCTGGCATAAGGGATTTTCATACATGAAAATATGGACTAAAGATCGA  
AAGAACGCACGTAAGAGTAACAGTGTAGCGATGGAAAAGGACAAGTTTTGT  
GCCTTTTAAAAGAAGAACTTGAAAGGAAAGATAGTATAGCAAATGCAAAG  
CTGGTTGGCATAGGAGTCCAGGATTGAGGTACTGAAAATTACTTAAGCAA  
TAATAACATAATAGAAACAAAATCTAACGGAGTAAACAGAAATGGACATA  
GCACCTGTGCATATTAATAATAGCAGGCAGAATTAATCAGGATTGAAAGG  
AAAAATTGAGTCATCAGCATGATGAGAAAGGGAGTAACACCCAAGGAGAA  
GGAGTGGACCGGAAAGAGAAGGTGACCTAATGAAATAATTCAGCAGAAGC  
TGAACCTTTAAGAATGACTGTGAATCCAAATCATCTTTAAGATTCTTGGG  
ACACCTGGCTGGCTCAGTTAGTACAGCAGGTGACTCTTTTTATCTCAGGG  
TGGAGATCAGTTAGATTCCAATGTTGGGGGTAACGATTACTTAAAAATAA  
AATCTTGAAAAAATAAAAAATAAAATTAATTTCTGTTCAAATGCCATGT  
CTTTCAAAAAGCCTTCTTTGAACACTCCTGTTCATGGTTGGTTGTCCTT  
TATTTTCCCTCTTGGGTGATGGTGATTCCCTCACACCATCATTAACCTTTCC  
TCATTATTTGGAATGCTGACTATAGTATCTTGTCAATTGTATTGCTTTTT  
GAGGAACAGGTTGCATTTATTTACATTTTTTCATGAGGCATAGTTCAATTC  
TACAAGCAGAGTGGATATCCAACAAATATTTGTCATATGGACAAATAGGT  
CAGCCTGCTTTGTTTGCAACTAGGTAATCCACATTAAGTAATAACATG  
ACTTTTGATATATGATAATTGAGTACCAGAATCAAAGGGAAAAGGTAAAT  
TTTTTGTAACCTCAAAACATTGGAGGAGTGAATCAAACAACCTCAAAGA  
AAAGATTTGGGTTAAGCAAACAAGTATGAGGCGAAGAGAAAAAATATAAG  
TTAGAATAAATTGAAAAGATAATGTGGAAGAAGAGAAATAAGACTCTAAA  
AAAATCAAAGCAAGTATTGGGGAATCAATATGAAATTGTCAAGCTTAATT  
TTATGGTCAAAAAAGTGATAATATAATTTCCATGATTTATTACTTACTGG  
TAAGAAGTTCAAGAACAAATATAGTCAATAAAATTTCCCTACTGATTTTGT  
ATTACTGATTTGAAGTGGTGCCTCGGAAATAATGGTCTAAATATATTTG  
GGTCTTTATGCAGTTTTTGGCATCAAAGCATCCAAATTGTGTTTGCCCT  
TTTTGTCTAAGGCACTTTTTAAATTCAAGTTGTTTCTACAAAGAGCACA  
TAAATCTTGATCTCTTGATATGTAATTTCTTGAAGACATGAGTTTTTA  
TTTTTTATTTATTTATTTTTTAAGATTGTATTTATTTATTAGAGACACAC  
AAAGAGAGAGACAGGCAGAGGAAGAAGCAGGCTCCATGCAGGGCGCCTGA  
CGTGGGACTCGATCCTGGGTCTCCAGGATCATGCCCTGGGCTGAAGGCAG  
CACTAAACCGCTAAGCCACTGGGGCTACCCGACACGAGATTTTAATAGTA  
AAATGGATAGGCCCTTAACATATAGCTGTGAGTGATCTCACTGAACATGTA  
TTATACCAGGCATTTTGAGATGCTTCATGCTTAGGCCACAATCATACATT  
GGATTATGTCATATGTGCTCAAATTTCACCCAAATTAGTAAAACAAACAA  
CAAACTTTTCAAATACCCACTTTTCCTTGAAAGTACTGTTTTGTCTATGT  
ATTTAGGAAACCTTAAATTAAGCTTACCAAGAGGGACATCAGATCATGT  
CACCTCAGCAACCTAAATTAAAGCCTCCTATCCCAATCCCTCCACCTCCA  
CCCTGCCACCCCTATCAACTACAAGTCATAGTTAATGTTTCAAGTCTTTGG  
GTTGATGGCCTGGATCTGTTTTTCCTACTTCTGAAAGAACTTGTCTATAA  
TATTCAGATCAGAGCTTACCTTTCTGTTTTGCTTTCTGCACTGATGAAC  
AGATCTAACCCTGAGGGACACATAAGACTGTGTCTCATAGTATGATTGA  
CAGAGACCCGCATTTAACTCTTAAAGAAATTGTTCCAACATTATGTGGAC  
TGTAGTGAACATTTTTAGAAATTGTGAAGGCATAAAACCCACAAAAGCTT

CTTCTTTTTCTTTTAAATTGAGAAACATAAAATATAAATCAATAGTTACT  
TAAAAATGTCTTTCAAAGAGCTAAATTCACCTCTGTTAATTTAAGAACATA  
AATCAAATGACAAGTAAATTATTCAATCATAAAATTATACAGATTGGTCT  
ATTTATAAATGATAGACCAGAGAGAATGTTAAGAATATATGAAAAAGTTC  
CCTTTTATGTTTTTAAATACAAAATTATAAAGTAAAAATATTTTATTTTT  
ATTTTTATTTTTTTTTTAAGAATATTCACAAATATTTTATTAATACATGTT  
GTCATATTCCCAGTATACAAGAGCCCTTGAGACACTGCCAGTATGGAAA  
GACACTAAACGTGCTCAGGGCCTTGGTCTTCTGTCTGGTTGAAGTGACCC  
CACACTCTTTTAATAGGACCACATGTGTTGTACCTCACCTGTCCACACCC  
CCGCATGGAAACAGGCTTCCCTTCAGTCAGATGCAGAGAGTGACACTCAC  
TGCCCTTTTGCAAGGATGATGGCTTCTGATGGTTATACCAGAATGGAAAAA  
ACTTGGCATCAGCTGACCACAAAGAAATTCAGACTTCATTTCCCAAAGTC  
ATTCATTCTGCTTCTCTCTGGGAAGGGCTAGAATGTCTTCAGGATGAGCA  
TAAAGATTCCCACTGCCGGAATATTCGGAATACTTTCCCTGGATTTCTCAG  
AGAGACTCATGGAGTCTGTTTCAGCTGGCTGGTTGGACTGCTTGTGGGCC  
AAGAGGATGTTTCAGCACAGCCTTCCAGCCTGGCTCTGTAGAGATACTGGC  
ATCTGTCTCCGTTCCACCATGCTCCCTGGTTTCCCTTGCCAAGTGTACAT  
TTACCCAAGGGCACCAGTCTCTATGCTGAGAGGTGGGGTCAAAGCAGCTT  
CGGGAAGATGTGTCTGAGCTGCTAGAAGAGCAGAGGCGAGCTCGTTTGGC  
TCTCCGGAGAGGACTAGACGGCACTTCCAGGCCACTACTGTCTCCTGTTC  
CCATACTTCGGGTACACAGGACGGCTTCTGGTGGTGGGGCTAGCGGCCTCT  
GGCTCAGGACGGTCAACAGGACTGGAAGAGTCCCAGCTCCGAGTTCGGGA  
GACAAATGGGACCTGGGCTCCTTTCAGCCTGCTCTGAGCCAGGAGAACATG  
TGGCATCCTGGCTCCGAGTCATCATCCTCCGAGGAGACTCAGGCACAAGA  
GGGAAGCGCTCTGGCCGTCCCTCAGGGCCTGGGATGGGGGAGCTGGTCAG  
GCCAAAGGATGCATCCAGGTCGGTCATGGATGACTCAATCTGCTGGAAGC  
CCCAGAGCCCCACCTTCCCTCATACACTGTGAACACGTTATTAGGGAGAGC  
TGCATGGGTTCCAAAGAAGAACTACAGGCCCAGCCACATACAGAGAGAAC  
ACATGCAGTGACATGGACTTGGATGTCTGAGCCTAATTTGCTTGTAGTTT  
TTCTCTCTTCAGTTCGGCAATCAAGTTCATCTTCAAGCAAGTGCAGAAGA  
AGACTGATCTTGTCTTCTGTCAAACACATAGTTTTCAAGTCCTCTGGCCT  
CAGGGAAGGAAGCTGGAGGTCCAAGTGACAAAGGCTTTGAAAACGATCTA  
GGAATTCGCTAACAAGAACAGCAGGCTCACCCAATGGCAACATCCCAAAT  
CGATCTGGGGAGGGGCTGTCTGGCCAGAAACAGAACTTTTCATGGGCAGT  
GCACAAGGCCTTCTTCAGCTCGGCACATCGGTCCCTTATATCGGTCAAAAT  
CAAAAGCTGGTTGCAAACCTGGCACAGAGAAAAGCCTGACAACTGGAGCAC  
TTGAGCATATCACATTCAACTGTGACCCAGCCATATTTTGCACAGACAAG  
TGGAGACAGCTCGGCGGGCTTACCTGCCCATTTTCAGAGAAGAAAATGTTT  
CCACTCTGCTAAAGAAGGCTTCTTTACTTGTAGATTCCAATGGCGGCTGT  
TCTGCTTGGGGTGACCCATTAACTGACTGGAATGTGGCAGATGTGTCCTT  
CGCTTCGGCGCCTCCCTCTTCCGGGGCAATCCCCTCATCTATCAGCTGCC  
GGACCTTTTGAGGGGTCCCTTCTGGGGAGCGAACAACCGCACCCCAAGTC  
TTTTCAACCCCCGAGGCAAACGCTTGCCCCCTCACTGGGCGCCGCCATCTT  
GGTCCCAAGTAAAAATATTTTAAACCAGTTTAACATATTTTAAAGAGCTT  
AGTGTCTCCAGCTAAACATACTGTGATGTTGTATGATGGATATAACATT  
GAGATCTACCTTAACTTGGGTGGTTTGGATTAGCCTTATTTTTAAATT  
TATGTTTATTGGACAAGGCCCTTAAATCTTTGGAATGCTTTATTTTCAGT  
TAATGCATTATTAACTAAAAAAGTAGGGGTAAAAAATCTGCCTACCCTC  
ACAGGGTGTTGGTAGATGAAAAAGAAAGAGTGTATGATAAAGTAACTTT  
ATTGTTATCATTTAATATCAAAAGTAGCATTTAGACATCTGGTCCCAGAG  
AAGATGGTATGGACTCACTTTTCTCTGTCCCTCCCTCTGGATGTCCTGG  
AAGTAATTCAACAAATAATTATAAAAAAGACTATAATTTTCATTAAAAATA  
CTATAATCATAAAAAATGACTTTTCAACAAAGAAAAGCCCAGGACCAGATG  
GCTTCATTGGTGAATTCTACCAACATAAAATGAAAAAGCAATGCCAATC  
CCTCTGCAACCCTTCCAAAAAAGTGAAGAGGAGGGAATACTCCCAAAGTC  
ATTTTGTGATGCCAGGATTCTCCTAATACCAAAGCAGACAAAAAAAAAAAA  
ATTACAAGAAAAGGAAATTAATAACAGCCCTGATAAATACAGATGTAAGG  
CGTCCCTGGGTGGCTCATTGGTTGAGCCTTTGCCTTTGGCTCAGGTTGTG

ATCTCGGGGTCTGAGATTGAGTCCCACATCAGGCTCCCTGCAGGGAGCT  
CACTTCTCCCGCCACCTATGTCTCTGTCTCTTGGTGTCTCTCATGAATAA  
ATAAAATATTTTAAAAATATAGATGTAAACTTCTCAACCAAATATTAGC  
AAAGTGAACCTCAATAGTTCATTAAAGAATCCTATACTCTGACCAAGTGGA  
ATTTACCACTGGGATGCAAAAGATGGTACAACATACGTAAACCAGTAATA  
TGACATACTATTTTAAATGAAATGAAAGATAAAATTATATGATCATCTCAA  
TAGAAACACAAAAGCCAATTTAAAAATTTCAACATTCATTCATGATAGAA  
AGTCTCAACAATTTGAGCAGAGAAGAAATGTATCTCAATATAATAAAAGC  
ATAATAATAAATAATAAGTTAAGCTCACAGCTAGTCAATGATGAAAGGTT  
GAAATCTTTTCCTTTAAGATAAGGAATAAGACAAGGGAGCCCATTCCCATC  
ACTTCCTTTAACATAGTAATAGAAGTCCTAGCCAAAGAAAGTAGCAAATT  
AGCAAAGAAAATTAATGAAAGGTATTCAAATCAGAAAAAGAGTAAAATTA  
TCTCTGTTTGCAAATAAGTATAATCTTACGTATAGAAAACCTAAAAACT  
ATATACCAAAAAGTTGTGAGAAAGTAATCAACAATTATATAAAGTTTTAGG  
ATACAGAAATGAATGAATTATCTGATAAAGAAATAAAGAAAATAATCCCA  
TTTGCAATAGAAATAAAAAATAAAGAAATTCTAAGGAGATCAAAGTTCTAT  
ATACTAAAAATACAAGATTTTGATGAAAAAAAACCTGAAGAAGACATATAT  
AAATGGGAACATATCCTGAATTTATGTATTGGAAGAACTAATATTGCTAA  
AATGTCCATGCTGCCCCAAAGCTATCTATAAGCTGTCTATAGACTCAATGA  
AATTGCTATCAAAATTCCAATGGCATTTTTTCACAGAATAAAAAAATCCT  
AAAACTCATATGAAATCATACTGACCCTGAATAGCAAAAAGCAATCCAGAG  
AGAAAGAACAACAAACAAAAATCAAGGCATCATGTTTACTGATTTCAA  
CTAGATCATAAAGCTAAAAATAATCAAAATGGTGTGGTACTGGCATAAAAA  
GAGACACATAGGTGGGATAGAATCAAGAATCCAGAAATAAACCCATGCAC  
TTATAGTCAACTAACATTTAATAAGAGAGCTAAGAGTACTTAATGGGAGA  
CATATAGTTTCTTCAATAAGTGATATTGAGATAACTGTATATTTCATATGC  
AGAAAAATGAAATAGGACCCCTATATCACTTGAAATGGATTAAAGACTTA  
AATATAGGATCTGAAACCAAAAAATTACCAGAAGAAAAACATAGGAAAAAGC  
TTCTTCACATTGATCTCGGCAATTAGTTTTTTGGATTGACGCCAAAACA  
CAAGCAATAAAATAGAATATAAACAAAGTGGGACTACACCAAACCTGAAAAG  
CTTCTAAATAGCAAAAGAAACAATAAAAAAATTTAAAGACAATCTATA  
GAATGGTAGAAAATATTTCAAATCATTTATCTAAAAGGAGTTAAATCCA  
AAATGTATAAGGAACTCATACAACCTAAGAGTAAAAAAGAAAAAAT  
CAGTTAAAAAATGGGCAAAGGATCTGAATAGACTTTTTTCCAAAGATGAC  
ACACAAATGGCTAACAGGTATATGAAAATGTGCTCTATATCACTAATCAT  
AAGGAAATATGTCTGAAGCACAAGGATATATCATCTCATACCTGTTAGAA  
TATTTATTATCAAAAATATAAAGATGGCAATGATGTAGAAAGAAATGGAA  
CCTTTGGGCACTGTTGCGAGGGATATAAATTGGTAGAGCCACTATGGAAA  
ACATATGGAGGCTTCTCAAAAAATTTAAAAATAGAACTACCATATGATCCA  
GAAATTCTACTTTTGGCTATGTATCTGAAGTAACTGAATCACTACTGGA  
AGAGGTATCTGCACTCCTATGTTCCCTTTCAGCTTTATTCAAATAGCCAG  
CAAATGAAAACAATCTATGTGTCCATCAATGGATGAATGGATAAAGAAAA  
TGTAATGTACGTCTACAATGGCATATTCTTCAGCTATAGGAAGAAATTCT  
GTCATTTGTTACAATATGGATGGATTGGGGGTATTATGCATAAGTTAGAT  
AGAGAAAAATACTGTAGGATATCATATATGAAATCTAGAACTCCCTCTCC  
TGCAAACCTCATAGAAACAGAGCAGAATGGAAGGCTAAGAAATGGAGGAAA  
TGGGGGGATGTTGGTCAAAAGATACAACCTCCAGTTATGAGATGAATTAG  
CTCTGGAGATATAATGTACAGCATGCTGATTACAGTTCATATTACTATGT  
ATTATACTTGAAGGTTGCTAAGAGAGTAAATCTTAAATGTTCTCATCCCA  
ACCCCCACATAAAGTAATTATATGAGTTGTTGGATGTATTACACAATA  
AACTTATTATGTGTCAATTCATTTACAATATATATGTGTATCAAATGAT  
AATGTTGTATATCGTTAACTATACAATATATCAATTATATCTCAATAAAT  
TTGGAAAAACACATGTTTAAAAATCGTTTTTTATATTTCAAAGCATGGGCAG  
TATTTTAGTTATCTTTCTAATTGATACATAATTAAGGTTTTCTGTAACACA  
GGACTGTCAACTTTGAAATTTCTTGAGACTTGCTCCACAGACTACCATGT  
ACTCATTTGTTTGAAAGTACTCTGTGTGCTTGAGAACGTACTTTCCATCT  
AAGTGCAGTGTCTATATGTGGCTTTTAAATCAAGATTACTATTTCTGTTA  
TTCAAATCTTTCTTTTTGTTTAAAAATATTGAGAAAGGAGAGGTACATGAG

GTAATATACTCCATAAATTTTTCAAATCCTCTTTTCAGATTTGTAATTTT  
TTCTTTTATATAAACTTGAAGGTATGTTATCAGATGCATATGCATTTAG  
AATTTTTTAAATCTTCCTGATTAATTAAACCTTCTATCTATTTATACATT  
TAAAAAACTAAGTTAGGGAATATCAGTGTACCCAATATTAGGGATTAGAA  
TATGGCTACAGTAATCTAGACAGGATGGTTCTGGTGCAGAGAAAGACCCA  
TAGATCAATGGAACCCAAATGATTTATGGCAAAGTTGTACACACAGTTTA  
CTGGAGGAAGGATAGCCTTTTCACCTAACAGTGCTAAAGCAAGTGGCCTC  
CATAGGCTACAGCAATAATAATAATAGTAATAATAATAATTTAAAAATCT  
CAACCTAGATCTTACACCTTATACGAAAATTATTTCAAAGTAGGTCACAG  
ACTTACAGGTCAAATATTGAAGTACACAATTTAGGGGAAAAATGAGAAAC  
TCTTTGGCGTCTAGGGCTGGTTAGAGAGTTTTTATATTTGATACTGAAAG  
CATGTTTCAGAAAAGGAAAAATTGATAAATTTGATAAATTGCTAAAAATT  
GATAAATTTGACTTCATCAAAAATTA AAAATATTTTTCTCTGCAAAAGACCC  
CGTTAAGAGGATAAAAATAAAAAATCATAGTTTGGGAGGCAATGTTTATAAA  
CAACATATCTGATAAAGGGATTTATTATATATAGAATATGTAAATAATTC  
TCAAAACCAAATTTAAAAAAATAATCTAATTAAGATTTGGGCAAAAGGCA  
TCATCAGACATGTTACCAAGCAGGATACACAGATGAGAAATAATTACATG  
AAAAGATGTTCAAGAACCACCTGGGTGGCTCAGTTGGCTAAGCGTCTGCC  
TGCCCTTTGGCTCAGGTCATGATCCCAAGGTCCTGGAAAGGAGCCCCCTGC  
TCAGTGGAGAGACTCCCTCTCCCTCCCCCCCCACACTGTGCTCTCTCTCAC  
AATCTCTCTCTCTCATATAAAATAAATAATATTTTTCAAACAGATGTTCA  
ATATCATTAGCCATTAGGGGAAATACAAATTAAAACCATAATGTAATATTA  
CACACCTCTCAGAATAACTAAAAATTTAAAAAGTCATAACACCAAATGCTG  
GAAAGGATGTAGAGAAAAATTGGTTCATTGCTGGTGGGAAGTAAAAGAATA  
TAGCCATTCTGGAAATAGTACAGCTGTTTATTCTAAAGCTAAAAATGTA  
TTTTCCAAAAACCTAGCAATTACTGTCTTGAGCTTTTATCCCAGGTAAA  
AGATCTATGTTTCATGAAAAATCCTATATACAAATGTTTGTGGCAGCTTTT  
TTCATATTAAGTAGAAGCTGGAATCAACCTAGATGTCCTTCAACAGGTAA  
ATGCTTAAACAAACAGTGGTACATAAAAAGTAGCAAACTATTGATACACA  
TACTTGAATGGGTTTCAACGAAATTAAGTTGAGTGGAAAAAAGTCCATCT  
CAAAAGTTTATTCACTGCATGATTCCATTTTTTAGAACATTTTTGAAATAC  
CAAAGAAATTGACATGGAGAACAGATTAGTGGTTGTTAAGGGTTAGGGGT  
TGTGCAGTGAGAGGGGATGGATATGGATATAAAGTGGTAGCATAAGAGAG  
TCTTATGGGATGGAAGAGTTATGAATCTTGACTGTGGTCATGGTCACATG  
TAACTACATATGTGATATAACTGCATGAAAATACACACATACACATACAT  
ACACCAGTATTTGGATAGCTAGTGAAATCAATCTGTGGATTGTACCAGTG  
TCAGTTTCCTGATTTTGATCCGGTATTATATTTCATGTAAGGTGTTAACAT  
TGGGGATCTTTGTTAGGGGTGTTTGGGCCCTCCCTAGAAATTCCTGTGAA  
TTTATAAATATTTCAAAATAAAAACTTTGAAAAGCCATATTTGAAATAT  
CTTGAAATTATTTTGCTATTGCACAAAACAAGCAGATTGATGCTGTCAA  
TATTATTTTCAAACCTGCATGCATTAAGCAGTAAAGACAAGACATAACTC  
ATTCTAAATATAAAAGAACTTGAGCAATCAAGAATAAAAGGATGCAAT  
TTTATAATCCTTACACAGGTACTATTTTATAGCCATGATAAAGATTGGAA  
GTAGAAAAGAGAAATACATAAATGATTAGTGCAAAAATGATATTTAAAT  
ATTTAACAACCTTTTATGGTCTGGACACTAATCACTCAGAGTAGATGGGGG  
CCAATTATTACAGACGTCAGCCATAAACAGAAGAATTGGTATCTATGCAA  
AGCAGTGGAAAAATCTATCCTATATGATTTTATTTTGATTTTATTTTATTA  
TTTCCTCCACAAAAGATTTATATTCCTAAAGTGTTGGTATTTTGTAGTAC  
CCCTAAGCTGAAAACACTGGAAAAGGTACTATATTATTGGATGAAGCATA  
CCTCAAAATGCTGCTATATAAAAAAATCATGACTAATATGAATAAGTACCAG  
TTAGCAAAAATAAGAACAGTTTCTATTAAAGATATTTTAAATTTCCCTCAAAT  
TTTTAATAAAACATCCTAAATATCATTATAAAAACAAAGTAACATTCAA  
TTAGTTCATAATATTTAAAGATAGGAGTTCAAAATATCAATGATTTTTTCA  
ATTCTAAAGTTTCAGTACTTGAGGGGTATCTTTAGAGTCTGTTTTTTTCT  
AATCTTTTACTCATTCAATTTGAGAGAGAGAGCAAGTGGATGAGTGAGGAG  
AGAGGGGCAGAGGGAGAGGGAGAAGCAGATGCCCCACTGATCAGGAAGAC  
CAACATGGGGCTCAATCCCAGGACTCCTAGATCATGACCAGAGCCAAAAG  
CAGATATTTAACCAATAAGCCTCCCAGGTGCCCCAGAGCCTGTTTTACTG

AATTATTCCTAGGGGAAAGCTATCAAGGTACTTTACAAACATAATCTTAG  
GTTTATTAGATCAGGAAAACAAATATTCAAAGGTGAAATTAATTTGCTCA  
TATTTATTGTTGAGAAATTAGGGTCATTAATTATCAATACAAATTTAATG  
AGACAACAGGCCAAAGCCCCCTATTTGAAAAAGAAATAAACTATGCATTCT  
AGGAACAGAATGTGAACTACAAAAATAAAATTATGTGTTTCCTAATCTGT  
GTGACAGTTAAGAAATTCACCTAAGAAATGACCTAAAACTACGTACAGAT  
GGCTAACAGACACATGAAAAGATGCTCAACATCATTTCATCATCAGGGAAA  
CACAAATCAAACTACAATGAGACATCACCTCACACCTGTCAGAATGGCT  
AAAATTAACAACACAGGATACAACAGATGTTGATGAGGATGCAGAGAAAG  
GGGAACCCTCTTATACTGTTGGTGGGAATGCAGACTGGTGCAGCCACTCT  
GGAAAAGAGTATGAAGGTTCCCTCAAAAAGTTAAAAGTAGAACTACCCTGT  
GATCCAGCAATTGCACTACTAGGTATTCACCCAAAGAATACAAAAGTACT  
AAATCAAAGGGATGCATGTATCCTGATATTTATAGCAGCATTATCCACAA  
TTGCTAATTATGGAACAATCCGACATCAATCCATAGATTGATGAATGGA  
TAAAGAGGATGTGGTACACACATATACAATTGAATATTCCTCAGCCATAA  
AAAAAGAATGAAATCTTACCATTTGTGATGACATAGATGGAGCTAGAGAG  
TATTATGCTAAGTGAATAAGTCAGAGAAAGACAAATACTGTGTGATTTT  
ACTCATATGTGTAATTTAAGAAATAAAACAGATGAACATGGGGGGTGGGA  
AGAGAGAGAAACACCAGAAAAACAGACTAACTATGGAGAACTGAGGGCTGC  
TCGAGGGGAGGGGGGAGGGGGATGGGCTAAATAGGCATTAAGAAGGGTA  
CTTGTGATGAGCACTGGGGGCTGAATATAAGTGATGAATCACTAAATTCT  
ACACCTGAAACTAATATTACACTGTATGTTAGCTAATTGGAACCTAAAAA  
TTTGGAAGAAGAAAGAAAAAGAAATGACCTAAAATTGATTAGTGTTTTCT  
ATTATTTTAGAATAGGCACCCCTTCTCATGGTCTCACTCATACGTGGAATA  
TAAGAAATAGTGAAAGGGACTATAAGGGAAAGGAGGGAAATCGAGGAGGG  
GGAATTAGAGAGGAAGACAATCCATGAGAGACTCCTAACACTGGGAAACA  
AACAAAGGATGGGATGACTGGGTGACAGGCACTAAGGAGGGCACTTGAGG  
GGATGAACACTGGGTGTTATACTATATGTTGGGAAATTGAATTCAAAGAA  
AAAAAATTTAAAAATAAATGCAAAATAAAAGGAAAACTCAGTACACTATA  
TTGATATATATAAAAAAAGGCAACCTCCTCTTGAAAAAAAATCCACTTA  
ATATATATTCCAAACATAGCTTATGCTATCTTCATTTATGTGCATTTTGG  
ACACCATTTTTTTTTAAAGATAAATAACTCAAACTTTAGTTTTAACTAAA  
TGTCATGGAATGGAGTTCTCACATAGGTAAAGAGGTTAAGATTATGTG  
ATTGTTTTTACAGCAATATGAGAAAACCTGCCTTATAATTCATACACATTG  
AATATGGAATGAAGCCACCTAGTATGTACAGCTGTGATTACAATTTTCT  
GAGAATTTAGAGCCATCGTAACAGAATAGAGGGGGACAATCTTTAATCTA  
TCAATATTAGGCTGGAATTAGCTAGGCAGATAATTTTAGCCTGCAAGGGT  
TTTGTTTCATTTCCATCTCTCCAGGATACTCTAGAATAATTCAAAGCTCTT  
TAGGTAGGCCAACTATTCTGAATTCTTCCCTCTTGTCTTCTATGAGGCTCA  
TTTGTGCTGCTCAGAACACACAGAAAAGGAAAAGAAAGGAACAGTTATTGA  
GAGCCTGTAGTGTACAAAGCACTGTCCCTTTTATTTGTGAAGCTGAATCT  
ACAGGAAACAGATATCCTTCCCATTTTTTACAGGTAAGAAACCTTAGGTTT  
TCAGAAGTGAAGAAGTACCTTCCCAAGAGCCCACAGATTTGTGTTTCGGA  
TTAGAAGTTTCCTTGACTCCAAATTTACACAATTTCTTCTTCTGAATGT  
GATAATTTAATTACATTTCACTTTAAGAAAAGAATGATCCTATGAGGTG  
TCTTCAAAAAGACTTATTTATTTATGAGAAAGAGAGTGGGGGGGGAGGG  
GCAGAGGGTGGGAATCTCAAGCAGACTTCCCCCCTGAGTGCAGAACCTG  
ACATGGGGACATGGGGCTTCATCTCATGACTCATGAGATCATGACCTGAG  
CTGAAACCAAGAGTTGCACACTCAAATGACCGAGCCACCCAGGCACCCCA  
AGGCTTGAATCATGTTTGACGTTAACCCCTATAGCTCAGTGAATCTTGGGG  
GATGTGTCAACCACTGAGATATATGTGATCAGCAATGTCTCAGGAGAAACC  
CCATGGTACTGATTGTGGGGGCCAGAGACACATATGTTGATGTTTTTTTAT  
ATGCAGTTCACTGATCTTGCTCCAAACTGTTTAATAGTTAACCACTATT  
TCTGTGGCGTTTTTGTAAAAGATTATATTGGCTTGCTAAATGGCACTCCCC  
CAAATACTAATATTAGAATCCAGTAGTAGGTGGAGATTTTTTTTTTTCTG  
CTATGTAGACTGGTGCTAAAACCTCTAAAAATGCAGAGCGATGACAAATGC  
ACAGAATGTAGTGACTTTTAGTACTTTTCGACTGTATTGTGAGAGAAGGAAG  
TATGCGTTCACGTTTAGTACATTATGCTTCAAGATAAAATGGTTGCTTTG

GTGTCAACAGATGGTTGTTTAAATATGTATTTGTATGGAGCCATCTATGTT  
CCCATGTCCCCCTTGATAACAATAAGAAAATATTTGCTAGTTTTTTTTCTC  
TAGCCCAAGAATAATTTAAATCAGTTGATAACCTCCCTTCCATCACTCTT  
TCACTCAGCTTCTTCTTTTGTAGTTGACCAAGGAATTAACTTTATGTACC  
AGTGTTAACAGAACTAAAAATGTCAACATTTACAGATCCATATCCACACA  
CGCACACACAATACATATGCACATTCATGACAGTATGCACATATATACAA  
CATCATGGAATTCATTTTGTAGAGATCAAAATTTTAATTACAATAATAAT  
AAAGAATTTATAGTTATGCAATCCAATAAGCTCTAAAATGTTCAATTTAA  
AAAATACTGCATAAAACTTTTGTCTCCAGGTAGGATGGAGTGAGAAGTTT  
ATAAACCATGAGAACACAAAAAAATCTACACAAAATGTAAAAAATAAAC  
AATTTAAAGGCATCAGCACTGCTGAAACAACAGGCCTAGGATTCCAAAGA  
GGAGAAAACCCCTGAAGAAGTGAGGGAAGAATTTGCAGCTGATTTTGTGTA  
TTCTGGGCTGTGGTAAGAACCCAGACTGCCTAGGTAGAAGGCCACTGCTA  
GAGGTTAGGGAAGCCAGCCGAAAGCTGAGGAGTCTTGAGAGCCATATGTA  
TAGATCTGCATACCACCGATTCTTTAATAACCAGCAGAATGCTATGCCTC  
TAAACACAAAAATCAATAATATTTATAGGTCCACAAGACTGTTTCTCTAT  
ATATCATGTTTGATGCCAATGACAAAATATAGACTTGAGAGATCTTAAAC  
AGACAACCCATTATCCCATGATGACATCTGTCAATTCAGAAGCTGCAAGG  
TCTAGAGGCAACAGCTAAGCTAAAACCCCTGAAATGCACCACAGGTTTT  
TGGCAGTCTTGCAATACTAGGAAGAAAAAACATTTTAAATATTGGCAT  
TTAAGATCTGCCAAGAGGAAGGCCCCACATGAACACACGGGGCCAGGATT  
TGTCTGTGGACCAATCCAGCCTGCCTCTATTTTCTGTATGGTCCAGAA  
ATGAAGACCAATTTATATACTTTTAAATGGTTGCCAAAAAATA  
ATCAAAAGTACAGTATTTTGAAATTCAAATCCTGAAAGTATACAAAACCTC  
AAATCTCTGTTCATAAACAAAGCTCCATCAAAATACATCCATGTCCTTT  
AATTATATATTGATTTGTCTGCTTTTGCATAATGAGTAGTTACAAAGAGA  
CTGGATAACCTGCAAAGCCTAAAATATAGGCTACCTACCCTTTATAGAAA  
ATGCTTGCTGACCTGCAAATAGGCTGTTAGTTGAAAACCTTGGGCAAACA  
TCCTAAGCACAGGAACAAACCAGAGATAAATCGGGTCCTACCAAACTCA  
GCCCAACCTCCTATTGGCTTAACTCCAGATTGGACTAAGTAATTAGCCTC  
CACTCTATCTCACTGGCATAAAAAAGTATAAACCTTTGCTGGAGAAAGATA  
TTATCATCTTGAGCCTCCATATAATTTTTTTTATACACATTTTACACACAT  
CCCAGCATTGAGAAAATTACTCTACTTTGTTTTTTTTTTTTTTTTTAATTT  
TTATTTATTTATGATAGTCACAGAGAGATTGAGAGAGAGGCAGAGACACA  
GGCAGAGGGAGAAGCAGGCTCCATGCACCGGGAGCCCGACGTGGGATTCTG  
ATCCCGGTCTCCGGGATCGCGCCCTGGGCCGAAGGCAGGCGCCAAACCG  
CTGCGCCACCCAGGGATCCCAGAAAATTACTCTACTTTGTTTGGTCTGAG  
TGGAACATATAAAGAAACCTCACTTAATTGGCTAGCTCAACAGCAGTCCA  
TTAACATCCAACATTTAAACACACAATTTTAACTATGTCTTAAAGAAAC  
GAAAAATAAAACAGAAGTAACAGTATTACATAAAAGCAAGTTTCTTGGA  
AGAAAACCTTAAATATGTGTCTGGAATAATAGTATTCTAACTAACTAGAT  
GTTAATTTCCATTGTATAACATTCCAGTAATATACGGAATAAAATCTAGG  
AGTTATTTATTTTGTAGAAAATGAAAACAAATAGTAATTGACTGGTTATA  
AATCATTTCTGAACTACAAGACTATATTGCAGGGCTTGTTTTTCAATGACA  
TGTGCTCCTCAGACACTGGCATCATATTTTAGGTATTTATCATCCTAAGA  
AGACAGACAAGTGCGGATGTGGGAAAACTGATAACATTGGAATATTAAA  
ATTATGCAACGTCTTATGCCTACATCTCTCCAGAATTTTAAAGTTTGAT  
TTTAACAGCTTTTTTCTAATAAAAAAGAATAACTCAAAGGAACAAGACAGCT  
GAGAAGTTCAATGTGTCAAGCACTGCAAATCGTTACATTCAATTTAATT  
AGGATATACTAAGGTTTTTACATCTGCGGCAAAAGTGAAATGTAACCTCC  
ATATATAACAGATCAGGCCATTTAATTTATAACTGATCACAATCTGCAG  
CATACGTCTTACTGGTGTCAAGGAAATATATAGCCTAATGGTGATCAAAA  
GTCCAGGTCACAGAATTTTATGGGCTTCAACCACAAGCAGTCATACTATT  
CTACAGAAAGCATACAGATATAGCTATAAATATAAAATTTAATATAGACA  
GTGGTTAAAAACTGGATATTTATGCATTCAAATATGTACATATAAACTGT  
ACACTATAATTCTTAATTGAACTCTTTACAACCTAGCTTGTGAACAGTTAC  
AGAAATGAACAATGTTATCAAAATATTATCTGATAAAGCCAGAACTATTG  
TTACAAAGGACTTTTAGAATTAGAGACTTATAAAAAAGTTGACTTTTCAA

AACTTTTTTAAAAGTTTAAACTCTCATCACTTTCTCCACTTTTAAAGAGCT  
TCTCAATGATAGATGCCTGTGAACAGGGCTCTAATAGGTTGAGGAGATAA  
AGGCTTGATTGTAGTCAAATAATAAATCAAAGGAGAGTATGCTATTTATC  
ATTTTAGCTAAATTTTAAAGTGTCTTTAACATTAAACTCAACATCTTTAA  
AAATTACAAGTGTCTGTAAACAGACTTCATCTAATTTACTAATATCAG  
TGCAAGGTTTACACCCATCTAACCCCCAACATTGTTCAAAAACATTCTTC  
ACATACATGAAAACAGTCAGTTTCTAAGCAAGTTAGTATTACTACACTAG  
AAACTAGAAAATACTAAGGATATCCCAGGACATTCATGCAACTGGTTATT  
TAATTCAAATATTTGATTAAAGGAAAGTAGCCATATGTATAGATCTGTAT  
ACCACCGATTCTTTAATAACCAGCAGAATGCTATGCCTCTAAACACAAAA  
ATCAATAATATTTATAGGTCCACAAGACTGTTTCTCTATATATCATGTTT  
GATGCCAATGAAAAGATAAGAGTCCTCAGAGAGACATATTGCAAACAAAA  
AGTCCTTAGAAGGTGGTGGAAAAGTCAGGCCAGGAGTCACATAGAACCAAC  
AGAGATGACAGAGATGTGATATCCGGCACAGTTTCCTCAGAAAGAGAAAAG  
GAAAACCACATGGCACTGCTGAAAAGCCGCGTTAATTCCTCTCTCCTCTCT  
AAGCATTAATAATACACCTTTAAAATTGTCTCAACTACATGATTGCTCC  
TGTCGGTGAGACCCTCCTTTAAGAAACACAAACATGCTCAAAGCGCAACG  
CAGAAACATCATAGAACTTAATGACCTACCATTCTCTTTGCACTCTTCT  
GGAGGTTTAGCCTTTTTTCGCAAGTCGAGGATCCAGCCATGATGTTGTCTT  
TGTGTTATGGCTGAAAAGAAAAGAGATCACTCTGAACAGACACATACTGA  
AAGGAATCAAGTTTATTTCCTTAAAAAAAAGGGGGGGGGCTGTTAGTCC  
AACAAAATTGCAATCGATACACTTAATTTGCTTACTGGTTCTAAGTAGCC  
CTGAAGGAGGTGTAAGAGTAATTGTGCAAGGCAGCTGTAAATTTGGCAAC  
CTCAGCTCCCTGTCCTCAAAGCAGCTATTTTTATTAAAAATCATCTAGAAT  
GTTGCCAAGTTCACCTCATTGAAAATGCAGAACTCATCCAGAGCAAAAGG  
AATTTATTACAAATACTGGATTCTCCACTTGAAGAGCACAGTTCGCAGG  
CTCTGATACTGTTTCCTCACTTTTGCAAAATGATTATTTTCATCTTAAAC  
CTACCCTTTTTCATAAACAGTTGTTTTGTACTCTTTAACTACAGAGCTGG  
CAGAGGCAGTATAAAAGTGATGGAAATTACAGCATGTTCCCGGGATGCCT  
ACATTTTCTCAAAAAGTGATTAATAGCAATTTTCATTAACCCATATTTAGC  
TGTGTTGCATCTAAATTTTTTTAATCCAGTTAGGCAGGCATAGGATACAA  
ATGCCTGTATTCTAGTGTCTTAGAATGGAATTTCTGGGAATTAATAATA  
ATTTAAATAACATTTGTGCTTTGGAAAAAATATCTTCTGGAAAGCCTTT  
AGTCAGGAATTTTAAAAACAGAGATGTTCTTACAACAGTGTGTCTTAAAG  
AGGCCCTGGAATCACCTGCATTGGAGTCACCTGGAGATTAACAGTGCATA  
TTCTGGGTCTTCACAGAACTACTGAATCAGAATCTTTGAGGTTGAGCCAC  
AAAATCTCCATCATTGGCAAGCACTCCAGGTGATTTTTATGCACATTATA  
ATTTGAGAACCACTCACAAGCTCAAACTGCTCTTTGGAGCTAAAGTCTT  
TACTGTGTACAGCTGTCTCAAGTGATCCCCTCTACCAACGGACAAATTAT  
CAAGGATGTGACATTTGTGAGGGCTTCAGAAAAAGAATGAACAAAGTCAC  
AGGTGTGGAAGGTGTGAGACATACAGGGAAGAGTCAAGAGGCCAATAAA  
TGGAACATGAAAGGGAACAGTAGAAAATAGTTTAGAAAATATAAATTAAAG  
CCAGATAATAGGGATATTTGAACACAGCTGTAAGAAAGTCAAATGATAAA  
GATGAAAGTCAAATGATAAAAAATTTACATATATTTTCTCTTTCTTCCTT  
GAAATTTAACTATGTTTTATTGTATCACAGACACAAGTATTAGCTAGATA  
ACCTGACAGGCAAATCTCCACTTAGAGCAAAGGTCAAAAAATTCTTCCAG  
GCAGCATATTTAATAGCAAACCTTATAGAGACCAGGTGCCTATTTAATGAA  
GAAAATTTTAAAGGTAGGAAAGAGGAAAGATAAAGACAAGCTGGGAGTGGG  
CAAGCAAGTCCAGGTGTTAAAGCACATGGTGTCTTTCTGGACGATGATCCT  
GTCTATTGTAGAGCCATCTCTGATTTGAAAACCGAGAGACATTAAGATTC  
TTGGGTCATGAAGTCTCTGCTCCAGAAGATTCCTTTTTTATTTCTGAATTT  
CACTGTGGTAAAGCGAAAATACTCTTCATCACTTCCTTCACATTTAGGA  
CCTCTGCAATGATTGATGCCCTTAAACAGGGCTCTCATAATTTGATCAGA  
TAAAGGCTGTGAATTTGGTCAAATTTGTAAATCGCCAGGAGAGTGTGCTAG  
CTTCTGTTTACTCCCAATTTGACCTTTGTAAAATCTGATGGTGCTTTATT  
ATTGAGTTTCAGAAGCAAGTACTGCAGACACTTTTGTCTCATTCTGCTCC  
TCATTTGTAGTCATGTCAATATCATCTAGTCTTTTCTCTGAACTAAAGA  
CACCCATGGAAGGAGATTATGACCACCTCAAATATGTTAGTGAAGTGGGT

TCAGTGTGTTGATGCTCTTATTTTGAATAGGCAAATTCACCTAAAAAAT  
TTTTTTTAGGGCAGCCAGGTGGCTCAGCGGTTTAGCGCGCCGCCTTCAG  
CTCAGTGTGTGATCCTGGAGACCCTGGATCGAGTCCCACGTCGGGCTCCC  
TGCATGGAGCCTGCTTCTCCCTCTGCCTGTGTCTCTGCCTCTCTCTGC  
GTCTCTCATGAATAAATAAAATAAATCTTTAAAAAGTTTTTTTTAATAGA  
CGTGACTTCATTACAAAGTGTGCATGCGCATACATGCGCATGTGCATTTG  
TGTGTAAGGCATGTTTCATGTCTGCGTTTTTATGTGTTAGGGAGAAATATT  
GGGAGTGAGCAAGGAAAATTTATTTCCCAACTTTTTAAGTACAACCTGCT  
TCTTCAAATCCTTCCTTCATTTTCGGAAAAAGTCATTTATTTCTAGGTC  
TTTTAGACATATTCACAAAAGCAAACACATCTAGGACTAAGAGGTAAGGG  
GCCATTACTAAGCCATTACAGGGAGTCAAATTACCATTTCCATATCATTC  
CACCGTTGGTCTCAAATACCGGCTAATTTCATAGAGAACTGTGAGTCTCC  
TAGCTTTTCCTGAGTTTATATAAAGCATTTTCATTACAGGATGATTGTTTTT  
TAGGTTGAAGTAGCATTAATGGTATGTCACTTTAATACACTTTGGCAGAT  
GGAGTCTCTTACGGTTAACAGCATTTTTTAGCTGATCCTCTGAAATGATTC  
TTAAAGAAATGTGGGTAGTAGTTAGTCTTAAACATCACATGAAGATACAG  
TACAGTATTTTTCAATAGTGGTTCTCCCCAGCCTTATAATTTGCATACTT  
CTCCAGGATTACAAAGGGGATATTTTTAATGCATTGGGAGACAACGGACC  
AAGTGGCTTTTCCATTTCCCTTAAATTATATATTTTTAACCTCGACAATT  
ACCTTTGAAAATAGGATTAATACTGGACAGGAACTGTGTACAAAATGG  
AATCGTTGAGGGATTTTTTCACAATCTACATAGCACTTTTCCTCAAGTTTG  
AGGATGTGATTTCTTTTTACTTCCACTGCTAAAGTAGATTTAAATAAAGC  
ATCAGTTTTCTGGATCTAACCAAATGGTGTGTACACAAATCGACAGGAAG  
GTTAAGAGGCTAATGCTATATGATCTTATATTGATACTAGTTTCTTAAAC  
AGAGACACATACACACATATATGCTGAATTTGCAAAGAAATTTTTTCCCC  
TAGCTGGAGAATGGAATAAATGTTTTCTAGGAATGCTAAATCATAGTAGT  
CTACTGCTGTATGTATTCCTATGGATAAAGTTAATGTGATGATCTTGA  
AGTGAGAGATCAAGTGGAGTGAAGTCAGTAGCTATTCAGGTTCAATCAAT  
CTCAGGTTTAAAAATCTGTATAAAAACCTTAAAAGTGGTTTATCCAACT  
CTTCCCCGATGTTAAACTGTATAATGAATCTATCTGGAGGACTGGAAAA  
AACAGAAGTGAAATTTCAATTAACCTCTGCAATAGTAGTTTAAATTCATA  
CAGAAATGGCCTTGAAGACATGATAGACTGACTTATAATGAATTAGAAAT  
TCTGTGTGTGTTTTTTTTTTTTTTTTTTTTTTTGTAAAGTTTAACTTTGC  
CAAATGACAAAAGCTGCAGGTTAAATAATAACATCTTATCTTCCTGGGG  
AAACATTCTGCTCACATAGAAAATGCTTCACTTCGACAGAAAAAGCTGCT  
GACATTATGGCATACCATTGCAAAGTTATTCTCATTATCTCGTAACATTT  
CCTGATGGTTGACTCTGTGCGGCTACGCTAGAACCTTCATATGCATCACC  
TCACTTAATGCTAATGAGCCTCTGTGGCTATAGATTTTTAATTCTGTTTT  
ACGGGAGAAACAAAGGTTAGAGAAAGGTGAGTAACTTGCCCAAGGTTACA  
CAGCTAGTGCCTGAAAGTGAAAGGGCTGGCATTAAACACAGTTACATCTG  
ATTTCCAAGTTCAAGTTTCTTAAGCTCTGAAACCAGAGGCATACTAAACC  
TAACACTTGTTTTTCATACTGAGTTGCTTTATTTGCTCCCTCAGAGAAT  
AATCAAAGATCCTTTTCTCAGAGCCTTTGCCAATAGTTTGGAATAGAGA  
CATTTATCTCCCGTTTGAGGAGAGTAATCACAAACAAATTCCTTTGTGTTG  
AATGCCTTGTAATAGTAGGTATTATATTAAATTGCAGGCTCATAGAGAT  
GAAAAGGAGGACATTGTGATTGAGGTACGGATAGCATCACTGGAAACATT  
TTTTTCCTTATAAACTTGAATTTTCCATATCAATGGCTTGATTTTAGAAA  
CTAGGGAACCAAGACTGCCTCAACCTTTTAGGTTATCTTTTCTCTCATCT  
CCAGTATTGGGTTCTCTGGAACCTTGACAAATATGATGGCCTTTAACTTG  
CCCTAGATCATGGTAACCTTACTAATTTCTAATCCATTCTCTTACTCAT  
TGCTTTTGCCGTGAGAGTCAGAGAGGGTCTTGACCAACCATGTAGTTCAA  
ACTCTCATTCAGATGTTCCAGTTATGTCTGCTTTTTTCTGTGTTCAATTCA  
GCCTCTGTTTTTAAACATTTTCAATGTTGGACATTTCACTATATAATTACG  
TAACCCAGTCCATTTCTGGGTAGTTCTTAATTATGAGACATTTATTCCTA  
CTGCTGAACAGAAATCTTTGTTCCCTATTACATAAAGCTAATGATACGGA  
TTTTGGCTTTTGGAACAGAAATAGAGTAAGTCTACAGGTTCTTCTGCATGA  
TGCAGCTTTAGATATTTCAAAATTGCTGTCAATTATTTTATTCTTAAATG  
TAGTGTTAAATAGAATTGAATATGGTGTGGAGATACGGTTTTATCAGTA

ATGAAAATGGGACTATTACTTTCTTCTCTGATTTAGATATTATCTAATTA  
TCAAAATAAAATTTGAATGACTATGTTGGGTTAGGTAGAAATAATTTATTT  
TTAATCCAAGTTGTAAGATGAGATTGCCAAAAGAGTATGATGGTTTTCA  
AAATTTATGTGCCCCCTTTATGATCCATGGACTTTTTTTTAAAGCATCAAC  
TAATTCAAGAAAAAGGTTTCCCCCTCTTGTTTTCTGTAAATAATTGCTGAT  
AATTTAAAAAATATTTTATTAGCATCTTGACTACAAAAGTGGGCTTCCC  
TTTATAAAGGACCAGTTTAAACAGGGTCTCCTGGTAAACAAAAGTTCCTGG  
ACTGTGTGTGAGAGAGAAAAGATGACAGATGAAAGCTAACCTAGAGCTAT  
CAATTAGGTCTTGTTGGTAAGTGCTGGCCTGGAAGTACAGCTATACCTT  
GGTGTCTCTCTGCCAACATCAACAATTTCTTAGCACACCAACTTCAGAG  
AAGGTCTCTCTATGACTGATGATATCAAGAGAAAAACAGACCACTCTCT  
GCTGTATCTTTTCTATTGCAGCTTTAGCCTTGCTTCATCTTTTCACCTTC  
TAGGTAAGAATTACTTAGAAAACCTGTGAGAAAATCATCCCTGCCCTTCA  
GAGTATTTAATCTATAAAGAACTCTCACTTCCTTGAACCTCTTAAAAAA  
CATCTCTTGGAAGACCAAATTTCTAAGGCTTCCTACTGAGATGTCACACAG  
TTCCCTGTAGGTGTGAGCTTTCCCTCATTGTGATGAGTCAATGAACCCAC  
ATTGGTTCAACGATATGTATGCTCCTGCTGATTTTGGCTGCAAGGTGCTG  
ATATCTTGTTATGGAAGTGACAAGTAAAATGAGAAAGACTACCTAGAATT  
TTACCAAATGTAAACCTTCTATATAAATTTCTTATGGCCTATGAAACCAGG  
TATAATAAATCTACACACAATGATACCAATTTGGACACTATATCCTTTAA  
TAAAGGCCCATTTATGCATGTTACCATGAACTGAATGAAAATCATTTTCT  
GATGGGAATCCTGCTAATGCTTTCTCTAGAGGCTCATTCTTGACATTCT  
CAGAACAGAAAGTAGGTGACCTTTTGTTTCAGGCACCTGTCTTCTGGCACC  
TCAGTTTTTTATAAGAGAATCAATCCTATCTTCCACTCAGCTGATAAAGCA  
TTTAATGCTCCACTTGACTGGCAATAAGGGCACCAGTACATCAGGTACAC  
GTCAGAAGGATGATCTTGGAATGATGGCTGTTTCGATATATTTCAAAGCA  
CAGCACAGACCTGCATCCAATTTCAAACTAAATGCCTCTCCCCCATTTCC  
TCTTAAAATCATGTGAATCAGACACTTCTGAGCTAATAATTAAAAA  
AAAAAAAAAAAAAAAAAGGAAGAAAGAAAGAGAAAGAAAAACCCACCTCT  
CCCCACTCCCCAGCCTCCTCCAGCTTCTTGACTAATACCTCTGGGCAGTT  
CACTTCAGAATGGAGCAGATTCTTGAGTGACAATGGCAAAGTGGCAGAC  
AAGTCCCCTGTACAGAAAGCACAGGCGACGCTTTCTTTGTAAAAA  
AAAAAAAAAAAAAAAAACCTCACACACACAGGAAAATACAGAGGCTGGAAC  
AAAAGACAGGGTCCCCGCACAGCGAGACGAGGCATCGCGCGCCCGTCTTG  
CGCGCGCCTCCGCCCCGATCGTCGGAGCGGCCTCGGCATCCGCGCGGACG  
ACCCCGCGTCTCCCCGGGCGGGCGGGCTCCGGCTCGGGGGCAGAGGCC  
GCGCCGCGGCGAGCCTGGGGCGGGCGCCCCGGGGTGGGGGCCATTTCAA  
ACTTAGCATATTTGGTCTCAATTAGGTGGAATGAGATAAGGCGGGCG  
CAGCCCGAGGTCTCGGGGCGCCGTGGCAGGCGGGGAGCGCCGGCTCAGC  
AGGTCCCGGGCGCCCGGCGAGCCCCGAGCCCCGGGGCCGAGCCGAGC  
CCCCCGCGCAGCCCCCGCCCGGACCCCGGCCCGGCCCGGCCCGACCC  
GACCCGCGGCGCCGAACAAAAGCCCCAGCCTGGCGGGCGGCCCGCGGGG  
GGCGCGGCAAGTTGGGGCTCGCTCACCTGGAGCCGGGCGCCGCGAGGCC  
CGGGGCCCGCTCGTCCCGCCGACCTGGCCATGCTCCTCGTCCGGCTCG  
CCGCGGACCACCTGTGCCGGCGCGCCCCGTCTCCCGTCGGCGGCCCGG  
GCGCGAGCAGAGCAGCCGCGGCCCGGCTCCGCGCCCCCGCACGCGCCC  
CGGGCTCTGCTCGTCCGAGCCGCGCAGCCACCGAACCGCCGCGGACGC  
TTTTGTTTTTCCCTCCTCTCGCAGACGAGGCGCGCGGCTCGGCCCGCC  
GCCGACGCCCCACCTGTCAGCTCCGCGCCGCCCCGCCCCGCGGGGCT  
GCCCATCGCCCCGCGCACCCCGCCCGCGGGCGCCGCGCTCGCTCC  
GGGCTCCCCCGCTCGGGAGGGGCGGGCCTCGGCGCGGTACAGTGACCC  
CCGCGGGGCGCGGGGCGGGGCGGGGCGGGGCGGGTAGTACACGCGC  
GGGCACAGTCACGGCACACGCGGCGAGGGCGCCCCGAGTCTTGCACGCG  
AAGGCACTCGGGGCCCCCTGTTGCCCCGAGAGAAAGCTAACACAGGACC  
ACGAGGTGTAATCAAAGTTCTCGGTGTGGAGCCGAGGCCGCTCACTTTC  
AGAACCGCCGACTCAACAGTGGCGGCAGCGCTCCCTCCCGGGGTAAACGG  
GCCCCGGGGCGGCCACGAGGGCGGAGGTTAGGGCGACGGGCCCCCACCC  
CCACCCCCACCCCGGCGGAGGGTCTGTCCCGGGGGGCGCCCGGAGGG

GGGCCGAGGGGATGTCTCTGCGGAGATGTCAGTGCGAGAGCAGAAATTTTC  
CGTGCAAACCCCAAGAGCTCCAGAAAGCGGCGCGGGGGGGGGGGGGGGGA  
GGCGGGGAGAGAGGAGCGCACCAAACCCCCTCCCTCGAAACGCAGGGAAC  
ACTTACCTGCCAGGTATGCGCCCCGACTGCCAGGTGGAAGGAAGCAAGCC  
CAGGACGCAGACGAGGTGCGGGGGGTGGGGGTGCTCTGAGCCCGGCTGAT  
GCACACCAAGTAATCCACGTTAGGGGGTCCGGAGCCCCCTCGCCCCATTCC  
CCGCACTTTCCACCCGAGGCCAGCCCCGGGCTGCGCGCTCCGGCCGCGCG  
GAGATGGCGGGAGCTCGCCGCGGGGGTTCCCAAGTGCCGCGTCCCGGAGC  
TCCAGGGCGCGCAGCCCCGACGCCGCGCCTCGCCTTTCTTTGCTGCGCAA  
CGCCGGCGCGAGCCCGAGGTCCCCGCCGGCATCCCCCTCTGCAGGCCCGGA  
CAGCGCCCCGGGGCAGCTCGGCCCGCGGCCCGGAGCTCGTAGGTGCGCGGG  
GCCGGGGAGGCGGAGGGGAGAAGCGCGGAGCGGCGGGCGGGCGAGCGGGCG  
AGCAGCAGCCTCCTCCGGCCCCCGCAGCCCCGCGCGCGCCCCGCGCCGCCT  
CCGCGCTCTGCCCGCCGCCGGGGCCATTTCGGCCCTTATATACCAGCCCGCC  
CGGGGGCGTGGCCGGGGCGTGGCCGAGGCGGGTGGGGGCGTGGTCTAGGC  
GTGGCCTGAGCGGGGCAGCCAGGGAGCCGCACTGCTTCTGGGAACTGTA  
GTTCCCTCCACCCCATCCCAGCTAGTGCACAACAGCTGTCGGCATGGTTG  
CCGCTCGCCCTCAACAGCGGTGCCCCCTTGCGCCCTCCCTTCGCAGGGAA  
GGCTGGGATTCCCGCCTCGCTGTCAACTCCGTTAGATCTAGGCTGGTCCT  
TGATGCACAAGGTGGGGGACCTCAAGCCCCCTAAACGCCTCCCGCGATGA  
CAAGCCTGGAGTCAGACAAACCGAGCTAGGTTGCAGTCCCAGCCTGCCAT  
GAACCGCCCGTGTGACCTTCAAGGAAGCGTGTGACCTGCGAGGCTGCAGA  
AACTGAAGTCTGATCAAGAGCATGGCAGCTCCTCAGATTCTTCATCGGAA  
GCAAAGGATATTAGAGTTTGCTTCATCTGAAGCAAAGGATATTAGAGTTT  
GCTTCCATCTGAAGCAAAGGATATTAGAGTTTGCTTCCACCGACAGAGA  
GAGCACAAGCAGTATTAACCTCACGTTAGAGACAAAAGCAAAGCTGGGAA  
CAGTTAGACAACCTTGCTTAATGTCACAGAGCAAACAACGGAGTCTGGACT  
CGAACTGAGAGTTCTCTGAGACATCTCCACTTTCTCCACAGTTCCAGATG  
GTCTGTCTATAAATCCCCCTGCAGCAGGACTGAATCCTCTCACTCTTG  
CTAGCTGCACTAGGGTTCATTTCAAGGAAGAGCGGGTGCTCTGCACAAGCT  
GGTATAAGAATGTGGCTGAGGGATGCCTGGGTGGCTCAGGGGTTGAGCAT  
CTGCCCTGGGCTCAGGTTGTGATCCCCGAGTCCCAGGAATGTTGCATTTA  
AGATGCTACAGAAATGCTTAGGAGGGGCAGTCCAGTGGGCAGCAGTTAGA  
GATATGGCCCTGGGACATTAGAGGAAAGTGAAGGCTACGGGTAAATCGACA  
GTATTTCAAGCTATGGGGCTGGATGTCAACTCTAACAAGATAAAGATGCC  
TAAATATAGGTGAGGTTAATGTCAAGGAAAGGTTTCTGGGGATATGATT  
TTTAAGTATCAGTTTAAAGACAGATTTTCTAAGATGATGTAAAGCTGTAT  
CATCTTTGCAAGCATTCGATCTAACACTGCAGCCACACATTCCTGAAGG  
ACAAATATAACAGAATACAGTGTAATGAAATACACTGAGCTGAAAGACTG  
ATTTTACCTTATGGAGGTCAGGAGTCATGCTGTCTCAACATGGTTAACA  
GCCAGCAAAGGTGATGGGGACAGGATGAGTTCGGGTGTTCTGGGTCCA  
GATCTTAACACTGTTACTAAATAATTATTACCTTAGTTAAGTACCTTAAG  
CTAAGTTTCAGCATATTCTTTGATAAGTAAGCATAACCATGGTTATGGGAC  
AAGAAATAACGTATGGGCTAATAACGTCTAGCACATCTTATGCATTCAAT  
AAAGGAGAGTTGCCATTATTTATTTTCATTGTTATTTTGTGACTGTCAG  
TATTAACCAGGTTAAAGCTACATTTCTACGGATAGAACAATACTGATTTT  
TATCATCAAAGTGACATATGTCAGAGAGAGAAACATTTCTGATCTGAGAC  
ACTGAAAGATCATCCCATGGCTTTTCTAGGTGATATGGGCTAACTCCATC  
TGTTTGATGTAATTCCAACCAAAAAAGGGAGCCTAACATTAATTATTCAC  
TTAAAATACTTGACTATTTCGTGGACAATGTTACAGGTCAGTAGAGCTTCA  
TGTACACAAACTTTACATAAATATGGCCTGAAACTAAAAGGAATGTATAG  
TTCTAAGTTTAAAGTCTAAAGGAGAAGCGATGAAGAAAACGAGTAGTAGAA  
GTAAATTGAGGACTCTTCTAAAACCTTTATTTACCTAGCGAGAATAATTC  
ATTTAGTAAAACATAAGGAGTTAAAGATTGGTAGGCTTTTTTTTTTTTTT  
TAAGATTTTATTTATTCATAGAGACAGAGACACAGGCAGAGGAAGAAGCA  
GACTCCATACAGGAAGCCTGACATGGGACTCAATCCTGGATCTCCAAGAT  
CACACCCCGGGCTTCATTAAACCTCTATGCCACCAGGGCTGCCCAAGATT  
GGTAGGCTTGATGCTTAAATGCATGCAGAATATTTTTTAAAAATACGATT

TTTTTAATAACCACAGAGCCACATAAGTGGAGTTGTACATGATTTCCAGA  
AATGAAAGAAATAAGAACTTGTAGTAGGTAGAACTAATAATGCCACTT  
TTAAAGAGGTACAAGTAAATAATGATCATGTACGTACATGTTGCTGAGA  
AATGTATTTATGCTTCTATTGGTGCTATTACACTCAGATAGCATAGCAGC  
TAAGAACATGCTTCTGGATCGATATTTCCCTATAAATAAATCCCAGTTTCT  
GGGCAAATTACTTAACAGTAGTGTGCCTCAGTGTCTTATCTATGAAATA  
GTACCTAACCCGTAAAATCTGTTAGGAGAAATAACTGAACTAGTACACAT  
AATGAAGTTAAAGAGTTTCTAGAACATGGTTAGCATCCACAAGAGGTTAA  
TTTTTACATTATTTATTATCGGTATTATCAGCATTTTTTATGTAATGGAAT  
AAAAGTACCTCAGTAAGCTTTTCTCACTTTCTAAATGCACCTCATCGATT  
ATACTATTTATGCTCTGAATTGACGTCTGATGTTAATTAGTATTATAGGC  
TCTTAGTTGATACAGGGCGGTAACTAAAATTTAAGCAAGAATTTTCTCAA  
TATTGTTTAAAGTGTCTTACATCTGGTAAACATGTATGGGAAGAAAAAAG  
GCAGGATAAAGACCCTATGCTAGAAAAAACGTGACAAAGTTCAAAAGAT  
GAAGATCTGAGTGAATATGTATGGGAAGGAGGCAATGTGAACCCTAAAGT  
TTCTATTGGATATTCTAATAAAGGATGAAGGACCAATTTCTGGTTTGGGG  
CTGTTTTCTCCATCTTTGAACACTGGGCAAAGAGCCGCTAATTTACATA  
TGTCTCATCTCCCATAAAGGGACAGAGAAGTCCAGCCAGGCTTACAGAGCC  
ACTGCAAGCATCTGTTGGCATTTGTGGCATCTATTGACTATCCAGACATC  
CCAGAGTTGGCCTGGGTAGTTGTTCTCTACCGTCCCTCAGGCTGAGAGGTC  
CAGGGACAGACATACTGTTAGGGCTGCTTAAGAAGAGTGCAAACCAATCC  
ATGTACCTTGGGACCCCTCCTGCCTAGCCCAAACCTCACAAACAAACCAA  
CCCAATTCCCTATGTCTAATATATGAATTGAAAGGAATGGTGCTTTCTAC  
ATTTACTATGACCCCAATTAATAAATTTCTAATTTACAAATAAATGTA  
TGTCAGAATACTTCATTTGATTTGCCTTATACAGAGTAGAAATGCAATA  
GAAACCAACGATTACAGGCCCAACCAAGGGCAAATATTTTATGTTTTTAGC  
TGTAAGGTATTAATCAGTAACAAACTCTGTAAGTCTTTTTGATCTCCAA  
CTTTGTTTTTTTGTGATTACTGCTTCCACTTGGCTGAATCATTTTGCTTC  
TCATATCAAAGATAGCTAAGAAAATATGTACTACCAACTTAATTCAAAA  
TCCATTACATAGTGAAAAATAAATATTTTGACAAAGATATTTTCAGAAATCA  
GAACAGAAAAGGTATCTAATTGCTTGAAAATTACCTATAGACCTATAAAT  
TGCTTTCCCTCTCATATACATTTACTTAGTTCTTCACCTTCTGAACCGCAT  
CACATTTTTTTCCGGCACAGGGTCTTTAGTAAGCAAGTTACATTATGTAC  
AATAGTGATCTTTAGCATTTATATAACAGGAAATCAGAGCAAAGGCACGG  
ATCGTTTGCTATGTGCGAATGATGGCGCTAATTCCGTTATACACATTATC  
TTATTAAACCTTGCAAACCGCCGAGGGGATGAGCACGTTTCGTGATTTTT  
GTTTTACAGAAAAGGAAGCACGCAGAGGTTCAATGACTTGCCCAAGGTCT  
GCGGCGGGTGAGTGCAAAGCCTCGCTCGCTGGATCTCAGAGGCCAGAG  
CCCCCACTCCCTTGCTTATTGCCCTCTGAACCCCTCTTTCCACCCAGC  
CCCCGTCTCCAGGGGTGGATTCAGGTTTTGTGGGACCTGAAGCTTGTAC  
CGTGTTCTGGAGGGCGGGGCAGTGCCTTTAAGAGAAATAATGAGGTTTAA  
AATACACATGAGACGAGAGACACATAGTTCGGTGCAGGGCGTAGAGGGCC  
CAAGCAGGTGAGGGGCTGCTGCTTACCACCTCCAGGGTAGGTCCCCCTC  
TGCTCCCCCACCTCCCCTGCAACTCTGCATCCCCGCCTCCAGCCACTG  
CTCTGGCTTCTGCGATCCACCGCCACGCCCCACCTGTCCCTCAAAGCGCT  
TTGACTCGAGGTGGCCAATGACACCCCAACTGCCAAGTCGAGGAGTGCTC  
TGCCGCCCCCTCCCCCTGGAAGAACTGTACCCCTGGCCTTTCCCCTCCTAC  
ACACCCCTTCTCCTCCAGCATCCTGGACACTACATTCTGGTTTCCCTCT  
CAACGTCGCCCACCTGTTTCTCTACGTTCCCTCCCTGGTGGAGCTCCTGTCA  
CCTGCTCCTTCCACACCAAGGTGAGCCTGACAGAGGAAAGAGCACAAGCTC  
TGAGAGAGCCAGACCCAGGAGGCTTTGACCCCTCGTCCCCACGTAGGAG  
CTGTGTGGCCATCAGCAAGTCGGTCACCCTCTCTGAGCCATTTTCTGCT  
CTGTATAATTGGGATGAAACGCCGTAAGTTATTTAAAAGATCAGATGACA  
TCATATATGCAGAGTGCTTAGTAGGATGGCCGGGCTCCATGGTCACTGAG  
AGCCAGTGTCACCCGAGGGCCAGTCCAAGGAGCTAGATGACCAGTTCCA  
GGGCTGACAGAGTCGCCTCATCCATGATCCCCCTGAGGACCTCGTCTTGC  
TGGGAGTGCTCGCGCCACCGCCCTCAAGCCTGTGGCCTCCTCCTACAGAT  
TTTTGAATGGCACAGGTGTCACTGCGTGGAGACAAGAAGTCTAGGCTCCA

TCCTGGACCCACCTTCCACTGCACCCACAATGTCCCTGGCATTTCATCAAC  
CGTCCGAAGATGTCCCCCATCAGCCGCGCCCTCCTCTCTGGTGGGTGCCC  
AGGTCTCTGGTCTTGCCCAGACCTCTGCACAGCCTCTACGTGATCCG  
CATTTCCACGGCCCCCGCTCTGCACCGCCCCAACCCACCTGCCTCCCCA  
GGAGGGCGAGCTTCTCAAACACATTTTCAGATCATGCTGTTTCTCTACTT  
GAGTGAGATGTACTGTCTTCCCTCCTCCACCAGGGTAAGGGCCAACCCAG  
CCACAAAGCCCAGGATTATCGGACTCCTGTCTGTCCTGTGCCTGCCTCAT  
TGCCCCCAAGGTCCCCTGCACGGCGACGATTCCCTCAGACATCCCAAAC  
TGTCTGCATTTCCCAAACATGGCACCATGTGCCTCTCCGCTCTGTGCCTG  
TGCACACTCGATTCCACCGCCTGGAAGGCTCACCCTTTTCTCTGCCAAC  
TACCGTCGGAGCCCGGTGCAAAATGTCACTGCCTCCTGGAAGCCCTCCAGG  
ATGCCCTCTCAAAAAACTAGACCAACTCCCTCTGTATCCTGCGCATGCCC  
CAATCACAGCACTATTTCGAAACCTACAACATTAGTATTTATTTCTGCTT  
CCCGGGCTACACGGTGAGCTTTCTGAGAGCAGTGAGATCTTGAAAGGCAA  
GAGAATGCAGTGGTCAGAAAGGTGAGTTCTGGAACCAGACACCCTGGGGA  
CAAATTACAGCACCTCTCAGTGCCTCTGCTCTGTTCATCTGTATCATGGGA  
TAAGGGTGGGTCCCCCTCAGAGTAGGGGTGGGGGATAAACTGGCGTAGGA  
AGACCTCACATAGGCCAGCAGTGAACAGGAACAGCAGACCATGAGCCCCA  
CACGTCATTTAAATGTTCTAGCAGCCACTTTAAAGGGCTCAAAAGAGGG  
ACGGCCTGGGTGGCTCAGTCAGTTGAGTGTCTGCCTTTGGCTCAGGTCAT  
GACCATGTCTGGGATGGACCTGGTGTAGGGCTCCCTGCTCGGCGGGGAG  
CCTGCTTCTCCATCTCTCTCTGCTCCTTTCCCCCAATTCGTGCTCACTC  
ACTCTCTCTCGCCCACTCCCTCTCTCTCAAATAAAATAAAAGCCTCAA  
AATAAAAAAGAAAAGCTCAAAAGCAGCAGCCAAGGTTAATTTTAATAAT  
GTTCAATTAACCCAGATATAATGGTATCTCACATCTTATCACCTCAATAT  
GAAATCTATTTTAAAAATATTCATGGGCTACGATGCTCTTTTTTTCATG  
TGACTCTGAAATCCAGCGTGCATTTTTTGCCTGAGACCACCTCTCGATTT  
GCATGTGCAGCTCCTGCCTGCTGCCCTGGGCTGCGTGCTCCGGGTGGCTA  
CCCTGGGAAAGGATGCTGGTAGCCTGTGCCTGGTCTCCCCCAGACTGCAC  
ACACACCCGTTTCCCTTGGCTGGTTTTGCTTTTTCTCCTTTTCACTGAAAT  
CATGCGTAGCTGTGAGTGCAGCTCTATGGTGAAGTCTGCGAGTTCCAGTG  
AACCCTGGGAAGGGGGTGAGGGGTGCCCGGGTGGCTCAGTCGGTTAAGC  
GGCTGCCCTGCAGCTCAGGGCATGATCCCAGGGTCTGGAATCGAGCCCTG  
CATTGGGCTTCTCTGCTCAGTGGGGAGCCTGCTTCTCCCTCTCCCTCAACT  
CATGTTCCCTGCTTGCTCTGTCTCTGTCTCTCAAATAAAATCTTAAAAAA  
AAAAGAAGGAAGGAAGGAAGGAAGGAAGGAAGGAAGGAAGGAAGGAAGGA  
AGGAAGGAAAAGAAAGAAAGAAAGAAAGAAAGAAAGAAAGAAAGAAAGAA  
GAAAGAAAGAAAGAAAGAAAGAAAGAAAGAAAGGAAGGGAAAGGGAAAGGG  
AGAGGGAGAGGGAGAGGGAGAGGGAGAGGGAGAGGGAGAGGGAGAGGGAG  
AGGGAAGGGAAGGGAAGGGAAGGGAAGGGAAGGGAAGGGAAGGGAAGGGA  
GGGGAAAGGAAGGGAAGGGAAGGGAAGGGAAGGGAAGGGAAGGGAAGGGA  
GAAGGGAAGGGAAGGGAAGGGAAGGGAAGGGAAGGGAAGGGAAGGGAAGGGA  
AGGGGAAGGGAAGGGGGAAGGGAAGGGGAAGGGAAGGGAAGGGAAGGGAAGG  
GAAGGGGGAAGGGAAGGGGAAACCAGAGGTGGTCTAGGGGTCTGGAAGTCT  
AGCTCCCCTGCCAATGTCCGGGTACCATGTTTACCAGGCAACCATCCAAC  
CCCCAGTGCAGCGTCCCAGGGACCCTGACTTTGGGGGAGAATCTGTACAA  
GGGAGTCTCCCCCTTTTAAGTGAATAGGCAAGAATCCTTCTCTTCTCCTT  
GGTCACTGCAGATTTAGATAGTTTTCCTTGCGTGTCCAGAGTCCAAGCAG  
CCTACAAGTGTGTGACACTGAAACACAGAGCATAATTCAACGGTCTGTGG  
CAAAGTCACTTGCAACACTCACTCACTCAGTACCTCCTAAACGCCAAGCA  
CACGAGTCCCTTCTTTCATCAAAAAACAGACAACCTGGCTGATACGGTGTT  
CAGCTCTTAAATTTGCCTTATCTTCTACGATGTAGTAATAGAGTTGCTGC  
GTCATAGGGACCTTCCACGAGTTCCTCCGCGAGGACCAACCCTAAGGCCA  
TGTGTACCTTCTCTGGGTATTCTCGAATTTGACAGTTCTAGACTTTTCAGG  
GCCGGGGCCACCTCAAAGGCTAGCATGCACTTACGGGGCTGCATTCTGAC  
GCTGGTACACACACTTCTGGCTCTCAGGGCCATCTCTGTCAATTTAAAAAA  
ATTATTTTAAAAAAACATTTTAATTGTATCTTATCACTGTGTTGGTTACA

TAAAGGTAATCCAGGTTGGCTGCATTACTACATATAATGTGCTATATTCA  
CTTTTCCTCTGATTTTGAAGAACTGAAATATTTTGTGGCCCTTGTAAG  
AGTATCATGAGCCCTGAGCACCAGGCCTCCTGCACCTACGGGATGCACTG  
GCCTGCCCAGGTAAGGCCCTTCCCGGTGGGGGACCCCTCAGGTTGTCATC  
TGTGAGTCAGGTTTTTACAGATGGAAAAATGTACGTATTTCAACCTGCGT  
CCTCTTGCTTTCCACCACACGGGAAGCCACAATCCTACCGACGTCCTGT  
GAGTCATACAGGAGCCCCGTGAGGCCACGACCCAGTCCTTCATGCCAATA  
CACTCAGGTGAGGCAGCGGGGGTGCACATCCCCCATCCCTGAAGCCTGC  
AGGTGGACTCCTCACATTTGGGTTTTTTCACGAGGATGGCGTTTCCGTGCC  
GGTCTGCAAACAGTCGGTCCCTCCTGCCTCTGTGCGCTCCCCAGGGCT  
GATGCAGAGCGGAACCGCAACGCACACCATCGGGTGCAATAATCCAATTA  
AATATCTGCCTCCCCCACCAGCACGAGCTGAGCATGAGACACGATTTTAC  
TTTTATTTCATCTCTGCTTCCCAAGGCCAGCCCACCATTCAGGAAGGAAA  
TGAAATATTTACTACGTATTGATTATAAATGCTCTCTAATTACCTTTCTA  
TGTGAAGATGTGATAAGTGAACAGAAAAGTTTTTAGCATTACGGTGCCAT  
CAGCCAAAATGCCTATCATTTCTCTCCAAGACACACACGGCAGTCTATTT  
TACACCCGAGGTCTCTCAGTACATCCTGTCCAAAATACGTTTATTACGTG  
GCAACGCTAATTACTCTTATTTTAAAGCATGCAAAAGGAGAGCATTTAC  
TGTCTACTAGCTGTGCGGGATTCCGTGAACGCAGGTGCCAAGAACGCAGC  
CCCGAGGCTGTGGCTTCCATGGTGCTGCTCCTTCTCTCACGCTCTCTCCT  
GCTCCCTTAGCCAGCTGCCACAGTGTGACCAGACCTATTCAGAGGCCCGT  
GTGACAAGGACCCAGGGCCCTCCCTCTAACAGCTCATAACGAACCAAATC  
TGGCCGACAACCTTCGAGTGAGCTGGGGAGTAGATCCCGCCCCACTTGAG  
CCTTCGGATGGCTGCAGCCCCGGTCACTACCCTGACTGCAACCTCCGGAG  
TCACCTTGGGTGAGAGGACACAGCTGCACCACACCCAGATTCCTGCCCCA  
TAGACACCTGAGAGGACACATGTTGTTTCGAGCTGCAAAGTCTGGGGTGA  
CTTGTTACTCAGCCGTGAGGTTACGAATATAAGTAAGTACTGTGAACAGT  
GCCTGGCACATATGAGCCACTTGGATATTTGCTGAGTGAGTAAAGAGAAA  
GAAAATTAGATGCGAAGGTGATGACTTATGACCTCGACTCTCTTTTAGAG  
GAAGGTGGTTAACAATTGTAGAAATACGGAACCTCTGCACCAGATCTGGAC  
AACCCCCAACATGACGGCCAGCCTGCCCCGTTGCTACTGTCCTGGTTACG  
GTTTCACACTGCTGCGTGGCGACAGCAGCATCTGCCCAATTCCCTCACCT  
CTCCTCATCCCCAACCCACCCTCACAGACCGGGTGCTGGTTTATCTTCCC  
CAAAACCCCTTGTCCAAAGCCTTCCCGGTGCCTCCCAATACCAGCATCAT  
CAAGGCAAACTGTCACTCAGCAAGGAAGCCCCTCCCAATGCTGCCCTCA  
CCGCCCTCCTCCCCGCACTGCCAGCAGTGTCTAAAGCGTAAAATTCTAC  
ATTGTGCACCAATTCTTCTGCCACAACCTACTGTATACAATTGAATAAGT  
TATAAGTCTACTATATACTCACGGAGCCCACTTAACCATGGAAATCTGAC  
TCTTTTCCCTTGGGCTGGCAAGCTCACTCCCACTCCCACTCCACACTGAC  
CCTCACCTTCGGTCCATAAAGTTAAGCAGGGCAGCTGCGCCTGACACTC  
CTCCCAGCTAGTGATCGTCCCTCTGCTCTTTGCAATCTGGCTCCCTTGCT  
CAGAATGGCCATAAATGAACATATTTTTATGGGCCCTAGCCCAGGACACC  
CTCTAAACTGCTCTCCACCTCCTCATTTAAGTCTTTCCTGCTGGAAGAAC  
AAATTCCTTGGTGAGGCCTGAGAGGCGACACCACATCACCTTGGTCAGTA  
CTGGCCCTTCCACTGTTAGCCAAACCTAGCAGGACCTTCCCTTACACTG  
CTTGCCCTAAACACCTTCCCGATCACCTCAACCCTAGGCCTCCAGTGTG  
CCCCTAGATAAGTAGTCTTGGGGGATGCCTAGAGGACCATCCCTAACATC  
CATGTCCCCTAACCCCACTGCACACGCAAAGGTCCCCGTTGAAATACACCA  
GCAGGCTGTGACTTGATTTCCCCCTCCCATCAACCCATAGAAGCTCCATA  
CCTATTGGCTCCTCCTTCATCTCCCCACTGAGAGAGGTGAGCCCCCTTCTC  
TCCAGCAAATTCTAGTGCCTTTTACATGACATGTCTGTGACTATGTGCG  
CTTTAGACCAACCATCCCATAAGCTCCTGGGGAGCTTGAATCCCTTTCC  
AACTCTAAAGCCCCTGCCTCATCCAGTTCTTCCCTCACCCCCTCAGATC  
CACCTAACAGCATTTCCCTCCTTTCACACTCACCTGCACGTGTGGGGGTGC  
ACACGCACACACATGCACACCTATGCACACAGGCCCCACGCTGTCTCTTT  
CCCACAACCTTATGAGCCAATCAAGAAGGACATTAGCATATGCCCATGTGT  
GTTTAGTAGAAGGGAGATTTTAGCTACAGGAAAATAACAGGGCTCGGGGT  
GGGGGGAAACACCTCTGTGTAAGTGACCCAAGAGATGGTCACAGGAGGTA

CCTCCCAAGAACCTTGAAAACAATCAAGAAGAAATGTTTCTGGTGAAGTC  
AAACTCATTAATCAGCAGATGAAGAGAAAAGACAGTCCTCTCGATGAGT  
GGGATTACGACACCTGGGGGGTACACGGATGCATCTAAAGAAGGCACCA  
CGTGGAAGCGGTGGCCTTCAGACCACAAATCAGACACACGCAATCACACA  
TATATGCACACAGCCCACACATGCACACGTCTACACAGCCGCAAGTATGC  
ACACACATATACCTGCACCCATACAAACTCACACATGCATGCACCCGTCC  
CCATACTTGTGAACACGCCCCACATGCATGCAGGCTGGCGCACGTGTGCA  
CACCTGCATGCTCAAGCACTCATACTCAAAGCACATGCCTACACATTTCG  
ACATGTGCACGCACACACTCATATACCTGCACTCATGCACATATACTCAT  
GCCACATATACAGGGACACACCCATGTACACACTTCAATGCGTATGCCTG  
TACATCCCCTGCACACATGCAATCACAAAAACACACCTGTGCACACGTGT  
ACTCGTGCTCTACATACACACACACACACACACACAGCTGCTCTCTGC  
ACACATCCCCACCCTTACACACACTCACCCCTGGTTCAAAGAGTTGACTG  
AGGCAGTGCCTGGCCAGCTCCACCCAATAACAATGAGGCGGACTCCTGGA  
CAGAGGGTCAGGGAGAAGGACAAGGGGAAGGGGGAGAGGTGGCCCACT  
TATCCGAGGTGAGCAGCCCCCGCAAGTTGCCACTGTGGGTACCATGGAAA  
CTGTTTCAAGGCTGAAATGTGATAAATGAGTGACGGTCCAGATCCAGTCCTA  
CCGCGGTTTCACTGTGACGGTGCAGGGGCCCCCGAGCAGTCTGACCTATT  
GGCCCTCTGCCTTTGCGGGTGACAGAGCTGCAGCAGGGCGGTACCCACC  
TAGAGGTACACTCGGTGCGAGCAGCACCAGGATTTCTGTGCAGGAGCAGG  
GCCCATGCCCTGCAGCCTCCCCCAAATGACATGGCCAAAAGCCCTCAACCA  
CTGCAGGGGCCCCGCGTGCCTGCCACCAACAGACCCCCATACAAAACCT  
ATTTCTCATTTTACCAAACAACCCACAAAGTCCAAATCCAGGTGGTAATT  
ATCCATATACATTATCGTGAGTTTTTTTAAAAATACGGCACTAAAAGAAAT  
GCTAAAGCGTATTCACCCAAAATCCTAAAACCAGAGCTGGGGTTACTCTC  
TAAGCTTGGAAGAGTTAATCCATGATCAAGACAAGGAAAAATGCGTTTC  
AAGAGGCATTCATGAGCCCATCTGGTCTAAAAATAAAACAACCAACAGA  
TATAATAATGGGAGGGGGAGGACAAAATTCTCTTAGAGAAGATTTCCAAA  
CAATATATGCAGGTACTTCCCCCTCCAGGAAACGAGCTGGCTTCCCCTCC  
TGCGGAGCGTGGGCTGAACGTGGGGACTCTCCTCTCATGGACAGAGTGTG  
GGAGGGAAAAAGAGCAAAAGTGCAGTGGAGGCACCTGGCCGAGCCGCTT  
ATCGAGTGATGAACGTGAGTGTCTCCAGGGAGAAATCACACTGATATCAC  
GTACCCCTGATGGGAGGCAAGGAGAACTGCACCTCTGTGCTACTCTGC  
CCCAGACCAGTCTATTGTTAAAAAAGAAAAAAGAAAAAAGAAAAA  
ACGGTTGAGCCAAAATTGAAGGACATTCTTCAAACGCATGACCGGCACT  
GTCCAGAATCGTCAAGGTCAATCGAAACTGCCCAGACCGGAGAAGGCTAA  
ATGCAGTGTGGGATTCCAGACTGGATCCTCCCCAGAAAAGGGTTATTGG  
GGCAGCCTGGGTGGCTCAGCGGTTTGGTGTGCTGTAGCCCAGGGCCTG  
ATCCTGGAGACCCGGGATCGAGTCCCACGTGGGCTCCCTGCATGGAGCC  
TGCTTCTCCCTCTGTCTGTGTCTCTCATGAATAAATAAATAAAATCTTTA  
AAAAAAGAAAGAAAGAAAGAAAGAAAGAAAGGATTATCGGTGAAGAAAC  
GAAGGAAATGCAGATCAAGTCTGTAGTTCAGGTGCTGGCACTGCACGGAT  
GTTAGTCTCTTAGTTTGGAGACTACCCAGGGTTACGGAAGATGTTACGA  
GAACTCTCTGTACTAATTTTCAAATTTCCCGGGAAACCCAGAATCATTA  
CAGGACGATTAAAAAGTTTATTTTAAACACTCTACTTGATCCGACAGGTG  
GATAACTGGCCCAAACCATATCCACCCTACTCCCCACCCAGGAATGAT  
ACAGTAGGATGGGGTCAGCAAGCTGTATACGCACAGCTTCACTGGCCCCA  
GGTCCACGGGCCATCAGAAAGGCAGTTGAACAGCTACTGTGTGCCAGGC  
AGTTTATTTTCTCTAATTTCCCAAACACGTGAGCACCAGTTTGCCTATA  
AATGGGAACCGGGCGGTGGGGGAAAGTTAAGGAACCTGACCTCCAGGTCA  
CAGGCGCTCTCAGGGGTGCCTCGGATCCAGGGCTGGCCCTGAAGCACC  
TGCTTCCGTGAGCCTCCTGGCCCTTTCAAGACCGGAACCATAGAAGAC  
CGCCCCCTCGCCCTATCAGAGCCCTTGGGGTCTCTTGTAAAGAGATGAGC  
CCCCCCTGGAAGGGGTCCCAGTCAGACAAGTTCTCCCTGTCCCAACA  
TCCCGGTTATTTCAAGAGCCGATACAGCACAGGACCACTAGGTGGCGACA  
GACCCACCCATGTCAAGGAGAGGTGCACAGGTGAGGACAGAGGCCACCC  
CTAGCTCGGACTCTCTTTTGCCTGAGACTTCCCAAGAGCCAAGCTTCT  
TATAGGCCACTCAGTGCACCCCCCTCACCCCTGAGATGACCTGTAGGCTC

ACCCTTCAGAGCCAGGGCTAGCAGAGCTCATCTCGACAAGCGTGCTAACC  
ATCCCCACTGTGGGGAGCAGAGCTCCTGGCCCCCATCTTTTAAACCTCAG  
AGCTCCAAAAGCAAACAAACAAACAAAAAACAAAAACAACCAAAC  
AAAAAACCTCAGAGCTCCAGACAGACAACCCGACAGCCTGGGCTTGAAC  
CTCAGCTCGGCCACTCCCTATATGCATGACCCCGGGGTCCCTGGCTTAGC  
AGAGGGCCTGGCCTTCCTCATCCAGCTCCTGGATCTAGTGATGCACAGCA  
ACTATTAAGTAAGTTAACAGGTGTGGGGAGCCTGGGTGGTGCAGTCGGGG  
AAGCATCTGACTCTTGGCTTCGGCTCAGGTCATGACCTCAGGGTCGTGAG  
ATCGAGCCCCATGTTGGGTTCGTGTGCTCAGTGGAGAGTCTGTTTGGAATT  
TCTCTCCCTCTCACTCTGCCCCCTCCTGCTTGTGTGCTGTCTCTCTCTCCC  
AGATAAATAAATCTTTAAAAAAAATAAGTTAACAGGTGAAAGTCATTTA  
AACCAGTGCTTCAGAAATGGTCTGCCAATTTTTTGGTGGTGGTTTTCTCCCT  
CTCGACGGGGTATGCCTACCCACCCCCCTGAACCCCCAACCCCTATTCCG  
TTATATGGAGAGGATATGATCTTACTGTGGTAACCATGGAAGGAGCCCTA  
ATGGACACCTGCCCTGGTGTGTATCCAGTTCCAAGAACTGAGGACTCTGT  
TTGTGGGAGATTATCTTGACCTCTAACCAGTTTCAAAGAACCCACATGGC  
GGACCATCCCCCTTATGCAGGGAGGTCAATTGGGCAGTCTGCATCGTGAGGA  
AGACACCAGGAGTCTGCATGGCAAACCTTGCTTTACTGAGATGTGGGGTTT  
CATTTCCGTTTCTGAAAAGGTCAAGGTGAATGTTTAGGAACAACAGCTTT  
AAAGCTTTTTTCTAGGCTCTGGGGGCACTGGGGTGGCTCAGTAGGTTGGGC  
ATCCGCCTTCAGCTCGGGTCACGATCCCAGGGCCTGGGATCGAGCCCTGC  
ATCGGGCTCCCTGCTCAGTGGGGAGTCTGCTTCTCCCTCTCCCTCTCCCC  
CTCCCCCTTGCTCTTTCTCAAATAAATAAGGCTTTTTTAAAAAATAAATTAA  
TTAAATGAAATAAAATTTTTTTTTTCTAGGCTAAAATACGACAGCCTGTAG  
CCAAACCTTGCCCTCGAGCTTGTAACCTCCTGTTACTCGCGTGTGCAACA  
GCTTCTGGTGACCGTCAAGCTGCAGCACAGCAGAGACAAGGCCTCCCAT  
TCTCGTGAGTCCCTCCATCTTCACATGAAGGTGGCAGCCCCATCTCAGCA  
GGGCCCTCCGCTTTAACACCCGCATGGAAGAGCCACCTCCTGGGCCTGA  
CAGCGCAGAGCTTTAAAGCTTGTGCCAGCGAGTAGTCACCAAAAAGCTC  
TGCTGCCTGCAAGCATTATGGAAGATGTGGATTGACCTGTTCCCAGTG  
GGATCCCTAGACGGGCAGCATGAGCATCGCAGGAGCTTATTAGAAATGCA  
GATCCCCGGGGCCCCACCCAAGAACTACCGCATCAGAACTCTGGGGGCAT  
AAAAAAAAAAAAAAAAAAAAAGGAACTCTGGGGGCAGAAGAGGGATCT  
GTGTTCTAACAGCGCTCACATGGCCCAGATGCACTTAGGCTGGAGAACCA  
CCACTCTGGATATTCAAGAGCATCCTTGTTTACACCGGGTTGGCCCTGCA  
CCGTCCCGCCTTCTCCTCCGAGTCACAGACCTGCTCTCTGATGCTTACACCT  
CCGTGGAGAGATGTGACAGGAGATGAACCCAGACGTACCTTGAAGTTCCA  
AAGTCTCTGTAAGAATATGGTGTGTTTGGGGGGTGGGGGAGCCCAGAGGG  
CTGGGGCATCTCTACCAAAGCACGTAGACAATGTCATCTACCGAGAATTG  
ACTGATCTAGAAAGCTCTAGACCACCCTAGACCATATCCATGCCACATTT  
AAGGATTATAGCAGACCGTTTATCCTAGCTTTGTTGCTGGTTTCATCTT  
ATTTTTTTCTACCTTTATTTGCCTTACTTATAAAAAATAAGGTTGCAAGCA  
AACTGCCTTACGTTTCAATTTGGCGACAAGGCCAAGCGTACTAAGCCTGTTG  
AACATTCTGCAAAGACCCACAACGTCTTTAAAGCACCGTCCAAGCCGGGG  
GAGAAAACGCAGTTTGGATTTTCAGGTCTTCAGCCCCAGCCTCCAGTTGG  
TACAATGTGGAGAAGCGCCTGCGATACTCTCGATACCCTCGTCTACGCAC  
TAGAGGGCACCCCTTGCCCTAGAGTCGGGCTGGCCGTCACCAGGCCCTGGG  
CAGGCTCCAGGGGCCGAAAAAGCGGTAAGAAAAAGACCCACTCCAGACCC  
CAGAACCATCTGAGCTGCAAGATGCTGCGAGATGCAGGCCCCCTCTCAGCC  
TGGCTCAGTAAGCAGGGACCTGGGGACACCAGGAGCTGCAAACCCGGGCC  
ACTCGTCTGCAATTTGTAGAGATGCCACGCTTGCCGAGTGCTATGAGGA  
TAAAAAAGACGGTACCGCTGAACATCTGAGATCACATCACTTTACAGAA  
CAATCTCCCCCACACGCAGACATGCACAGGTGCTCACCACCTCGTGACA  
GCAGCCCCAGCCCCCTGGATGGCTAGTTCCATCACCCCACTTGCAAGATGA  
GGAGTGTAATCCCCAAAGTGCAAAGTGACTTGACAGACCTGATGTCTGG  
GCCCATTGCTGGCAGAGCCTGGGGAGGTGTCACCCGGCCAGGGTGGTTTTT  
CATGTTAGCACAGCACCTCCCCAAAGGCAAACATGAGCCTGTTCTCAGGA  
GCGCCGGCCTCAGTGACCCGGAGCTGGGATAAACCTGGGGTGAGTGTGGC

TGACGGAGCCCAGGGCGCGTCCCCAGGAGCCCTGGCCCATTGCACACAGC  
GGTGGGGGGAGTCACGGCTGGGAGGTCTGCAGCCCCCTTCTCTGCCTTGA  
GACTTCCCTCCGCTGTTAAGAACCTCATCAGGTTATGCTCCACATTATGT  
TACAACTGCTGCTGTATCTCACCTATTACCAAGTGAGGTAGGAATGGGT  
GTGGGCCTCAGAGCATGTTGCCGGTGGGCCCCGAGGGACCTGCCTGCACC  
CCCCTCCCATCCCGGCATCACCCAGCAGGGTCCCTGCCCCGAGGAGTTTG  
GAAAATACAAGAAAGAGACAAGGCACCTGCCCCAAATCCCCAGAGGCCTC  
CCCGCCCAGAGGACAAGCGACCCCTCCGGGTGGTGTTCCTGCCCCAAGGC  
CAACGGTAGAGCGTGGCCTCCCTGCCACCCAGCCCCGACCCCCCGGCACC  
CCTGACAGCGGTCCCTCCAGGCCAGAAGTCCCTCACACAAATGGCCCCAA  
CAAGGAACAGCCGCCAACTTGCACAGCCACTTCGCATCAGGATCAAAAAC  
ATGGGCTAAATACACCAGCCCCAATTTTTCTCTGTACTTACCCCTTTCT  
GTCTGTCTTAATAAATATTTTATGTCAAAGCAATCCCCAACAGGGTTT  
CTGGGCAGACAATGACAATGTGAGCCTTTCCTACATCCACAAGAAGGGGG  
AGTCTGTTGAAACCTATGTACGACCCCAAGGATACGTCCCCCTTCATCA  
CGAAAGCTGCCTCCGTTCCAGCCCCGGGTGTCTGTGAATTCCTGCCTGGT  
CCACACGGGGCGGGCCCGCAGCGCACGCTGCCTTCAGATTCCAGCTCCGTG  
GCGAGGACACACCATCGTCCCTGCAAGGCGGCAGCCCTGCCTCTCCCTGT  
GTCCCCCGTGGTGTGTGAATCCAAATGCTGGGAGAAAGGGATCTGGAAAT  
AAGCTTTGCTTTGCGTACATAACTATATTCTCTGCCCCAGGAGAACATCC  
ACCCAGTGAGTGAGCCATGGCTCAGCAGGGCTCGTGCCTGGAGCCGTATG  
AGCATCCCTTCCCAGCCACCACCTCGGTTTTCCCCCTCGGTTGTCCCT  
CCCCGAGGACGAGAACTGGAGGGGGGGCAGGCTCCGTGGCTGAGCCCCG  
GGGGGAGCTGTAACCACTCCTTGGGGGACCTTCATCTCGGGGCAAGAGGC  
CTGGTCATGGTAACTGAGGCCGGGGGCACAGAGGCAGGCCCCATGGTATT  
TTTAAGGGCCATGAAAATGTTTTAATTTATTTTAAATCAGAAGAGATAA  
AAAAGAACACGAATTTCTAGGCTGAAGGAAATGTCTTACTATATAATGTC  
AATGTGGTTGTATGGAAACACACAGCTTTTGGTTCTGTTATACAGTTT  
TTTGTGTTGTTGTTGTTGTTGCTTGCTTGCTTGCTTTGTTTTGTTTTTTT  
AGGAAGGAAGAGGCCCATGAAGGCCAAAGCACCTCGGACAGTCTGCATGA  
GGCCGGGAGCAGCCCCGGAGGAAGGGACCTGTGTCCCCGAGCAGGATCCC  
TTAGGCACCCCTGCAAGTGGGCCCCAGGAAGCCCCCTCTCCGTGGGAGC  
CCCTTCTCCGCCCTGAGGGTCGAGCTTCTGCACCCACCACCCAGGACGT  
GGGTCTACATAGCTCACGTAGTTTCCCTTTGCCAAGAGACTCTTGAAAA  
ATTGGGGGAACTTTGCAAAGGGCCTCCTCCTCCAATTCTGGGTCCCAAAC  
TCTTCTACGAGGCACAGAGGGCACAGAGGGCCGGCCAGGTGCAGAAAG  
CCGGGTAGATGAAACTCTGAGCCTTTCCCTGAAACAAATCCTATGGCCAA  
GCCCCAGGCGTACCCTCCTTTCCGTCTTCTTATGATAATATCACCTAA  
CAAACTCTCTAGGATTACAGGGGCACCGAGCCTGGCCACACTGTGGTGCT  
GCCCTCCCCACTCTCTGTCTAGAACATTCTCACCCCACTGAAAGGAAAC  
CCCGCCCCCATGAAGCAGTGGCGCCCTCACCCCACTTATCCAGGCC  
TGGCGATCCTTACCCCGTTTCTGTCCCCCTTCATAGCCGAGAATCATA  
AATACGTGATCCTTTTGTTCAGCTCCTTTCACGGGCATAATGTTTTCA  
AGACTCAACTACCCTGTAGCATGTCAGGACTTCACTCTTTGTAGGGCTGA  
GGAACATTCTACTGTTCCCTTCCTTTTATTTTATTTTTCCTCCCCTT  
TGTAGGCAGGAGAGCACTCAGATGGGAAAGCGAAACCCCTCCGTGACGGAC  
ACCGTCCAAGCCCACTGGCAAGCCCTCAGCTTGGGACATAGGGACAGGGA  
CACAGGTCCTGTAGCCCCAGGACGGCGGCATGCACAAAATCAGACGCAC  
GTACATGCACCGCAGGATCCTCCCCTCTGCTCCATTCTCCGGGGCCAGG  
AGTCCAGGGCTGATTACAGCACTGACATCAGAGGATTCTAGAAGCAGCATG  
GCAAGCGGGGTCTCCAGGGTCTTGCCCATCAACCCATCTTACTGACCCTC  
TGGCAAACGCTGGGGCCTGGGCTTCCTGTTCCCCCTCCTCCATGAGGCCA  
GGGAGGACCAGCCTTGGGTCTGGGAGAGGCAGACTCAGGAAGGGGGAGG  
CAGGAGGGAGCCGAAGGAAGGGGACGGCCTCCCCAGGAGCTGAGGGAGAC  
CAGGGGATGGGCAAGCGGAGGACCCGGCCCTCCTGGGGCTCAGTGTGCAG  
TGCTGGGGGAGCAAGGGCAGCAACGAGGCTCCACGCTTTGAACACTGCGA  
GAGCTTTCCCCGCAAGTGAAGGAGGGTGAAGAGAGGGAGAGGGCACGGCC  
CCGCGACGGACAGCCCCCAGGCCTCTCCGGCCACCGCGAAGGCCGCTTC

CCGTTGACCAGGTCCCACCGCCGCCCCACCTCCCAACGGCGAGGGAGCAG  
GGGCCACAGCTCTGCTCCTCTTCCCAAACCTCACCACAGTTTCAAAGCAAC  
GGGGACAAGGGATCTCGAATTGTCAAGTCAGGAGACTCAAGTCACTGCAG  
ATGCTCGTTATTAAAAAATGCACAAAAGTACAAAGATGTT  
CATGACAGCCTTGGGGTGAGAAATGGAAACCCAAAGACCCAGCACTGGGG  
ACATGCTGAGGCAACAATGGTCCACTGAGTCAGTGGTCTCGTGCCACGA  
AGGATCGTGAACAAGGTACACTGTGACGTGGGTACGTCTCCTGTCGTGTA  
AAAGTGACGGAAGAATGGAAGGGACCCGCTACTGTGGCTCTGTCACATTG  
CTGTGATACGGATATCCGGTCGAGCGCGGCAAGGGGACCTCAGACATATT  
TCATCCCCAGGCCACTGCCAAGGGCTCGAATTTTCTGACACCGTTTCAAC  
GTGTCCCTTGCGTGAAAATGAACAGTAACAGCCTCCGTGCTCCTCGCTGT  
CACGTTTACCTCCGTGACGTTTCCCATCACCTCCCCCTCCTTTCGGGACAG  
GATTTGGAAGAGCTTTCCTGGAAGAGAAGCTCGGCCACCCCTACCACAAA  
CGTGTTTCGTGTGTATCCACGTGCACATACACACACACGCACATGCACA  
CACGTGCGCACACGCACTTGCACTCTGCAGGGCCACTTAGCAACTCTCAA  
GTCAGGGCAGTTGGTGGCACTTGGGGCCAGGCCATCAGTGCTGGGAGCAC  
ACAGCAGCTCTCCCCTTTCAAGGGCTGTTTGCTCAAGGCTCAGAGCTGCA  
GGGCAGGGCAGGGCTACAAACAGAGGAAGACTCTTCGATGCCCAGAAGGA  
ATCCCTGTTTTCCATCCCCCTCCCACACGTGCCCAGTGGTCTTGAGGAT  
GGGAAGGCAGGAGGAGAGGGGGAGAGAGGGGTGCAGCCAACATGGGAACA  
TGGACAGAGGGATCCCCCGGCGACGCGGAGCAAGGCTGAGACTCCAGTT  
TCTCCTCCAACGTGTGAAGATTTCCACACCCCACCTTGAACCTGGAAATCC  
ACTTATGGGGACCAACGGTCTTCGGTGGCAGCTGGGTGCCAGGCAGGCC  
CAAGAACATAACTGAAGAGTCTCCAGGTATCTCCAGGATGTGCAGCTCGA  
GAGGAGAAAAAAGTGGAAAGCGGAGGCCAGGAATGCACCTGCACT  
TTGCATCCTACGACTGAAATGCCCAGTCTGACCGAAAGGTAAAATGGAGA  
AAAGGCGGTTTACAGGCCTCGTCTATATGAGACGAAGCCAAAGCCGGTGG  
TCGTCTGCTGGGTACTGCCATTCAGCAAACCGTGATCCTGGGGTTTTTTT  
GCAGGTATTATTCGGGCGAGGAAACAGAACAAGACGAGAGATGTCGGAAC  
AGGAGAGAGAAAAGGAACACGAGAGGCTACGCTGGAAGGAGGATCAAACC  
ACCTGCTGTGAGATCAGGACTCTCCAGGATGTAACGTGGGCCTGGAACAG  
GGGCCGGAAGTACAAGCTGATGGCAAGGAGGCAGGATGCTGCAGAGAGG  
GCTGCCAAGTGCCAGGGGGTTCGGAGCAGCGAGTGCTTGGAACGGTGCTG  
GAGAACAGAAGGAAACCCACCGGAGCACCCCGAGGGATGGCAGCTGGGA  
AAAGCATGGACTGTGTGGCCAGGGGTGCTTGAGGTGGGGGTGGGGGGCTT  
CCCCAACAGCCCACACCCACCTCGAGGTTGCCACCAGGCATCTACCCCC  
TGCTTCTCCCCCGATGGCAGCAGCCACAGCCCTGCGGCCCTCCCTGTGG  
CACATCTGTGGGCCACCGCCTCGGAGCAAGGGCTTGGTCACCTGCTCTG  
GCCACACTGTGGCTTTGCCCCCTCTCCCCCTCCGGCCAGCCCGCACCCCC  
ATGCCCTGGCTTCTGCATCCACTTCCTCCTGGCCGTTCCGAGCAGCAGCA  
CCCCGGTTGCTCCCCTATCTGGAGCGGGTGCTACCGTCCACCCAGCCTCA  
AGCTGTCCACCTTGTATATTCCCTTCCCTGCCCCCTGGGGAGCCTCCGAG  
AACCAGACACCCAGAATGTGCTGGCTGAATGAATAAATGGCTCCTCTCT  
GTCTCCCTGCCCTCCTTGGAATGGGGCTGGGGAGGGAGGAAGGGAGGGAAA  
ACCCTGAAAATACATCTAAATGGGAAATTTAGAAAATACATCTAAAATAA  
AAAAAATTTATTTTATTATTTTATTTTATTTTATTTTATTTTATTTTATTA  
TTTTATTATTTTATTTTATTTTATTATTATTTCTTTATTTTATTTTATT  
TTTTATTTTATTTTATTTTATTTTATTTTATTTTATTTTATTTTATTTT  
AGAACAGCCCTGAGAATCAGCCAGGGAAGAGAAAAATCAGCTGCAGCCAT  
GGGGAGCGTCGGAGAGAGAGGGAATTTGCCAACATCCTCCCAGATGCTC  
TCTGGGAAGCAGGAGCGAGGCCATGGGAGGGTCAAGTCCTTCCTGGCTGG  
GAGGAGGGTTGGCACAAGTTCCAATCTTCCACTTGCTTTAATTGCCAGGA  
AACAGAGCTTCTCCGTCTGTCAATTATGACTTAATTAAGCCGAAACCGCCC  
GGAAGGAGGAAGCCAGGTCCATTAAAGCTGGCTGGCAAGGTGGGGTGTAC  
AGCTTGGGAGCCCCCGCGGGGACAGAGAAGACAGGGCTCAGACCCCCA  
GGTGGGGCCCCCGTCCCTCCCAGCACACCCCCCAACCAGGTGCATGCTTC  
TGATCAACCCGTATTGGGGCCCGCAGTTAAGTCTGGGGACACACACACAC  
ACACACACACACACACACACACACACACGACTCAACGAAAAGTCAGTCGT

GGCCCCTTGGCCACTTCTCAGAACCTCCGAGTGAAGGAAGCCAGATGTCC  
TATGACTGTGTGGACACAAGATGCCCCCATAGGGCAAATTTGCAGAGCAG  
ATGACCCAGGGCTGGCCAGGCAGCAGGAAATCTGGGCCCCTGTGAGGAGG  
GAGACAGAAATGTCTCGAAACTGCACTGTGGTGATGGTCACACGACTCTA  
CCTATCGACTGAAGTTCACGGAGTCAGACCTTTACAGAGGATGAATTTTA  
CTGGATTTAAGTTATTTCTCAATAAAGCTGTTCTTTTGTTTAAAGGTTGG  
TGTCCACGTAGGCGGCTCATAGGAAAGAATGAAGCTTCATGTTTCGGAGCC  
ACCACCTGCCCCCAGGCGCCCAAGTCCCCCGCTGACGGTCGTGGGCTGC  
ACAGACCGCAGGCTCCCAGGTCAGCTGTCTGACCTTGGGTGCGCTTCTGG  
GTTTTCTCAGCTGTAAAGTGAGGCTAATAATAGTCACCTGCAGGTGTAAT  
ATCACCAGAAGGTGGCATGTCTACACACGCAAGTGCCACTTCAGTGCTT  
TTCCCTTCCAAGTTAGCAGGTACTTAAAGAGATCTCTGCGGTGTGCCTGGC  
CCTGTGTCTGATGCTCCGGGCGACAGTCCTGTTAGAGAACGTGCTCTGGA  
TTTTCAAGTTTGCCGCCTTGTAGATGCACTCAAAAGGCAACTCAAGGTAG  
CTGAGAATAAAACCTCGTAACCAAGGTCTAAGGAGTCAGGGCTGAAAAAT  
CCAAAGGTCGAGCCACGGCCTGGAGGAGACGGGTCCCCAGGAGAGGCTCT  
CAGGGGAGCTGGGGGCCGAGCCGGCTCTGAACAGAGGCCGGAGCCTCAGG  
GAAGCACACGGCCTTCCAGTCTGGTTTAAATCCCCGCTCTGCCCCCTCA  
CCAGCCGTGACGGTGGGCAGGACAACACTGAACATCTCAAGCCACATCAG  
TAAAACAGCTGCAGAGTGGAATCCCTCCCAACGTTGATGTCAGGAGCAG  
TGACGCTGCACGGGCAGAGCCCCGACACGCAGTAGGTGCGCAGTTACCATC  
TGGCATCTGTGCCTTTAAGGAGAGGCAGCATGCGAGGGTCAAGGAGGCAG  
GGGGGAGGAGGAGGAAGGAGGGAGAGGGAGGACAAGAAAGGGGAGGGAGA  
AGAAGGAGGGAGGATGAGGGGGAGGAGGGAGGGAGGAGGAGGGAGGGAGA  
AGAAGGGAAGGGGAGGAGGGAAGGGGAGGAGGGAGAGGGAGGAGTTGGAG  
GGAGAGGAGGGAGAGGAAGAGGAGGGAGGATAAGGGGGGAGGGAGGAAGA  
GGGAGGAGGAAGAAGGAGGACCCCTTAAAACAGTGAAGGAGGCCCCCCT  
AAGTGGGGCACTCTCCAAAAGATAGGGAAGACAAGACAATTTCCCTTCAAG  
GCACAACGGGTCCCCCTCGGCACCGTCTCAGCCGCTTCATGAGGCGGATG  
CGTCGTCAGCAATGATGAAAACCTGAGGGCGGCCCCCAGGGTGGGGGCAG  
CGTGCCAGGCCCAGGGCTTGGGGCCTGCGGGGCCCGTGGGGGCTGGGCCG  
GGAGAAGAGCAGGGGAGAGCCCCCCCCGAGCGAACCCCGTCCCTCCTCGCAC  
CACGCCGGCCTCTCGGTGACACGGGCAGGGACACGCTGGCTTCTCCAGGC  
CCTCTGTCAAACACAAAACATACTGATTTACTGATGCAAACTCTCCCGCA  
AGGTGATCTGCTGACAGGTGGCGGGAACACACCGAGTGTCTGCGAGGGA  
GCACCCGCCTGTAGGGTCAACGGGGCCCCACGGGCCACCGGTGACCCTG  
AGCAAGTCACTAGACCTTGCTGAGCCTTGGGCTCTGCTGCTGCAAACTGA  
GGACAAACAAAGCCCTTGCAAGGCTACGCAGCCTGGTGCTTGGAGCACGA  
CGGCTGAGCCCAAGAGCTCGTCTGGGGCCCCCTCTCTGCGTCTGACCTTGC  
TCCTTGGTAAAACCCAGATGATGGCTATGCCTTCCCAAGGGCCACCGTGA  
GGACCGTGAGCGTGCATGTCTGTGACGCCACGTGTCTGAGCAAGCTTCCA  
CGGGGGCCGATCTGGGCATGGGTGCCCGCGCACCTCACCGCGAGAGGCGC  
CTGAACACGGAACGAGCTAGTGTGTTAGCAAGTGCCCCGACCACCCAAGA  
ATGTCAGCACAGAGAACCACGCGCAGAAACTCCTCTCTCAGAACGGGG  
TGAACGGGCCCTGGTGCGATGCTGGCCCCCTGCCTGCCCCCGACGTGCC  
CCCTGCGAGGAGTGGCTCAGAGCCGAGTGTCCACACCTGCCACCAGGATT  
CTCCATCACGGCTCCCGCGGGCAGGTGGCTGGCAGTCCAGGTGACCCAGC  
TCCGGGCTCCTGGGGGGCCGTGAGGGCTGCCGTCTGGAACAAGACCCC  
TCAGCAGAGAAGGGGCTGTGCCACTCTCCCTCTCCCCGGGACTGCTGCAC  
CTGTGGGCCCCACGAGCTGAGGTCTACAACCAGTTGGGGGTCTACAAGCC  
CCTGTGGCTAAAACCAAGAGGTGCGGGTGCCTGGGTGGCTCAGTGCTTG  
AGCATCTGTCTTTGGCTCAGGGCGTGATCCTGGGGTCTAGGGATCGAGTC  
CCACATCAGGCTCCCTGCATGGAGCCTGCTTCTCCCTCTGCCCATGTCTC  
TGCTCTCTCTGTGTGTCTCTGTGTCTCTCATGAATAAATAAATCAAAAA  
GAAAAAAAACAACCCCCAAAAGCAAGAAGGCATTAGTTAGAAACCAAAGT  
GAGTCACTGGGTTTGGGAAGACCCGTCCACAGAGGACAGCAGGGCGTCTG  
CAGAAAAGACGCAGCTGGGCAAGTGACAGGGCTGGCCGTGGAGGGTCCG  
AGGCAGAAAGCACTGGAGCAGGAAGGTCTCTGCACGGCCCCCTGCCGCC

CCAGACACCCGAGGTCTCCGGCACTATAGTGAGGACAGGTGAAGGGCGCC  
CCACCCCTTGTCCCCACGTCCCCAGGGCCTGCCTCCACTGGGAGGGCTT  
CTCTGCTCGGTTCAGACCCCCCCCCATTAGGCTCAGTGAAGGAAGCAGAAC  
CGCAGCCCACCAGGAGCCCCCAAAGGAAGACAGAGCCCTCTCTCCATCCT  
CCCTCCCAAACCCAGGGAGACTCTCATGCGGGATCTTCTCTTGGGCCAC  
CCTCACGGAGCAGAGCAGATGAGGGATCGATTCCCCCAAATCTGGCCCAG  
AATGCAAACCATCAGGCCAGCCACCCCGCCAACCTCCCACGCAGCTGGCCG  
TCCTCGCAGGGGGCCAGGACCCCGACACAGAGGCTGCAATCCGTCCGGCG  
CGGGAGTCCTCCTCGCACGCCCTCTCCCTGCCTCCCCGTCCCTCGCTCGC  
CCTGACCTTCCTAAACAAAGGTGCTTTTTTCCCCTGCTCCTCGGGGTAC  
CACATTTTCGTACAGACCTGTGCTTGTTTTCTTTCTGCTTGGGCCATCTT  
GGCTTGCTCCCCAGGCACCACCGTCCCCTGGAGACAAACCCCGTATTGT  
TTTCAGGGACCTAATAAATGACAACACTCTCCCACCCCTGCCACTTACC  
CCACCAGCCCGCCAGCTCCCCCTTTGCCCGGTGAAGCCTGCCTTGTA  
ACGTGTGGCCCTCCCCGCCGCCCCCCCTCCCACCCGATGCAAGAACAGG  
AGGCTTATGTCCAGGGGAGAGCGAAACCTGCCCGGACTAAGGGCACCTCC  
CCAGCCGCGTGTCTGTGCCGTGAAAGGTGCAGTCCAGGGAGAGGCCACGGG  
GGCGGGCAGCTCCAAAACCTCAGCCCCCGTCTCCTCCGGTTCAGGCCGAGAA  
CCAACGGGAACACACAGACATGGCCCTTAACGGTGCAGGATGATAAACAG  
GAGGATGCGCGGTCCATTTTCCAAAATGCACCTCTCGTCACCCAGAAGGC  
TCCCTTGCCCGCTGAAAAAGTCAATGCCAGGAGGGATTAAACCGAGCACA  
GGCCGACTTTTTTTCCTGGTCAAATTGTTGAGGTGACACAGGCATGCTCTG  
GGAGGGTATGTGGGCGCCCAAGGAAGGTTGATCACCGGTTAAAAAAAAA  
AAAAAAAAAAGGCTTCTGAGCTGCTTGAGTGTGGGCTGCGTCAAGTGTG  
CAAGAGCAATGAGCCAGTGACAGACACACATCATCCTGCTTGAACATAGA  
CCCGCACGTGCGTTGTTCCAAGCCTCCAAAACAATCCCCAGAGCCTCCAG  
CCTTCCTTGGGTGTGAAAGAAGCCGGAAGGGGACAGCAGCCCCACCACCC  
TATGCCCTCAACCACGTGCTCTGAGCCCGACCTCATGCTCGGTGCTGCC  
TCGTTGACCAAGCACCCAGCAGGGCCGACACAAGAGCTCAGCCACCCAGG  
AGACCGGCATCTTGACTTCTGACTCCCTACCCTTCCCTGCCGTTGGCCTG  
GCTGCCTGGGGCCAATGGGTCTCGCATTTTCCACTGGTGGCAAAGGTCCC  
ACCCTCCTCTGGGCAGGGGTGAGAGGTGGGATGACATCCTACCAGGGCA  
AGGGTGACCTGGGTCTATGGGGAAATGTGCACGAAGAACCAAGAGACAGGA  
GAGTCCGTGTGCACACCCAGGCACACAGGGCCGCGGGTATGCCCATCGTA  
AAACACGTGGTTGCATTATTTCTAGAGCAGGATGGACTCTGGGACACGTC  
CTGGTTCTCTGCCTACAACACAAGCCAAGGCTTAGAGAGGCACGGCAAGC  
TCTCCAAGATCTCCCTCCTGGGAGGCGGCAAGCTGATACAGAGACCCTGG  
ACCCAAGACAACGTGCGCCCTCCTTTAGATGGCCCATCCGTAGACGGTGG  
CACCGAAACCTCTGTGCTCTACGTCCCTGCAGTAAGTAGTTCCAAAACACT  
CACCTGTAGGAGATGAGGGCTCGCGTTGAGGCAAAGGTAAAGAAATAACC  
AGGGCACACCCACCAGCGCCGCTGCCCTGCCCGGAGTGACCCCGATCCCC  
CAGCCCCATCGGTGCTAGTTGTCACTGTGGTGTGAATGTTCCCTGGAGAT  
TATTCTGGATCCCATGGCTGGTGGCGACTTCAGGCCGGTGATGCTCATTT  
TCTCCATCCAGTCCCTGGGAGCCTGGTCCAGGAACACACCAGGGATGCAGA  
GGCCACCCCTCCGACTGTCCGAGATGGGGCTGTTGCTTCCCCTTCTTCCC  
CACCCACCCGTGCCAGCGCCTGCTTCTGAGACCCACCCAGCCTCCTCT  
TGCAGGAAGTCCACCTGCAGAGCCCGGAGCTCCTGCTGTCTGTCCGCAGA  
AGGTCAGGTTCTCACCAAGGTGGCCCTCCATCACTTTAGTCCCAGCGAT  
CCGGGGCAACTGTTGCCCTCCTGGTTTCACTGTAGGCAGCCTCAGCGGG  
GAACCAATGGCCCTTGGGCAAGGCAGGCTCTGCCACGAGGGGAAGGCCCA  
GGAGCCTCCGGCCCTGGGATGCGGGTCCCCTGATTGCCCTGGCAGCCGTG  
ATTTGTGAACAGGGACCTCACCTGGGGCCACGAAGCCCTGCTGGAAAGGCC  
TCTCCGGCTGCCGCTGCACCCCCACCCGGCCTCCCGCAGGCACCCACTCC  
TGGGGCGGGCAGACATGAGACACAGGCCACCTGGGAATTTAGGAGCCGA  
CCCTCCTGCCCTCCCCTCCTCTACCCCGCCAACCCACCACCAGGGTC  
CACCACCCGAGGAAAGAAAAATGGGGAGACAGTCACAGATTTAGGGTTCA  
GGGGGGCGCTGGGAACGGGGTCAGGGATCCTCTCTCTCAAGACATTCTGTG  
GGGAAGGTTTCCTTCTCGACCACAGCTCCCTCCAGCAAGGGCCCTTAACTC

AGCTTGTTTGCTGCAGCAGCCAGGTGGGCAGCAGAGGCTCCAGCCTCTCT  
GCTGTCTCCCCGCTAGGAGGGGGCACCCGTGCGAGACAAGCACTCCGAGG  
GCACGGGGTACAAGGGGTGCGAGAGGCTCTAACGCACAGCTTCGCTTTGC  
AGCGCTTAAGGAGCAGCTTTCCAGCCGGAGCCACGTAAAGGGAGCGAGGA  
ACAGCAAAACCCAAACCAAGCCAGGCCAGGAGGCGAGGGCCCCGGCGGCA  
CCAGCACCCCTCATGCTGTGTGACCCCGGCGCCCTCAGCTCCTCCCCTGC  
ACCCCTTGAGCTGTGCGGGGGGGGGTCTCCTGCTGGGCAGCGGGCAG  
AGGCTCGAGGCACAGACACTCCCTTGGTGATGGGAGGCCGGCGCTGTCC  
TCTCGGCCTACGTCCCAGGTCTGCAGAGCACTCAGTAGCTGTTCAACTAA  
CAAGACTCCAATTCCAACAACCAATCACGGAAACGTCTGGCTTACATGAC  
TGAGTGAAAACATCTCGCCACGCACAACAAAGGCTACGCCCCAGTTATGG  
CAACGGCCACACGTGAGGGGGCCGGGGGTGCCCCGAGACCCCCAGATGGGG  
TGCATGCACGCAACCTCGCCAGATGTGCAGGCGCATGCACACAGCTGGG  
GCCTGGCCACCAAGTGCACAAGCGTTGCCCTATCCAAATAGGCTGAAGA  
AAGAAACCAGGGATTCTCTTGGCACAACCAAGGCGAATCCGCCCCAAGGG  
TTTCTCGGGGCGCTGCAGGGGACAGCCAAGGTGGTTCCAGCAGAGTCACA  
GCCCCACTGTCCCCTGCTGAGAGTCCCCCTAAAGATAAGCTGATAAGATAA  
TGGCCCTGGAGGCTCTCCACTCCCCCAGCCCAGCCCCACCACAGACCCC  
TCTCTGTTTGCTCAGACCCCTGCTCTCAGCACAAAGTCCTTATTGGTCT  
CCCCGCAGGGGTGAAAATAAAGGGGGTTTTGTCTTCTCCCGGCGGGTCT  
GAGTGAGTTTATCTGACGCTGCAGCGGGCTTTGTAAGCTGAGTGTCCCAG  
GATAAACGCTCCCTTAAGAGTTGCTTGGCTTGGGACAGAGGGACCCTCTC  
CAGAGGAGAATGGGGAGCTTGTTCCGATGGTCTTTTAATATGGGGGGCGG  
GGTGTACGGAGGACAGGCCTCCAGCAGACTCTCACAGAAGGGTCTCTGT  
CCCGGGGCTACAATGCAGGGAATTCTTAAAGACACAGATGCAGAAAGGAA  
GAATGATTTTTTTTTATTTTTTTTCTCCCTCCTAGGAGGAGGGGAGGG  
TGAGGAGGGCGGGAAGGAAGAGGGGGTGTGGCGAGGACTTCTCCCTCCCA  
GAGCAATTACAGTTATTACCAGGCAGCTCTGCCTCCAGGACAGCAGAAAT  
GCAAGCAGGGGGAGCAACCGCTGCAGAGCAGGATTCTGGTGGCGGGGGG  
GGGGGGGGGCGGGCTGTGAGCCCTGCAGCGGGGTGGGCTCCCAAAGCCA  
GGTCGGGAACCCCCAGCAAACAGGAATCTCATGTTTTTTCTTAAGATTAT  
ATTTACTCATGAGAGACACAGAGAGAGAGGCAGAGACACAGGCAGAGGGA  
GAAGCAGGCTCCATGCAGGGAGCCCAATGCAGGACTCGATCTCAGGACCC  
CAGGATCACACCCGGAGCTGCAAGCAGATGCTCAACCACTAGGCCACCCC  
AGCGTCCCAGAAATCTTATTTTTACCGAAACGAAGGGCTCCATTCCGTC  
GTCATACTAAGAGGATCAATCCCTCGAAGGCAGTTTGAGTCCAAATGTTG  
GCTGTGGAAAGCGGGGAGGCAGGACACCCCCAGGCCCTTCAATAAATAAA  
ATTCTCTCCGGCCCCAGGGCGAGGGGGTAATTTACTCCCCCGTTGTTG  
TTGGTTTTTTTTTTAATAATAAATTTATTTTTTATTGGTATTCAATTTGC  
CAACATACAGAATAACACCCAGTGCTCATCCCTCGTTGTTTATTATGGCC  
CAAGGTCACCCCTAGCTTACGTCTGAAGACATCCCAAATATCATCACAAG  
TGATGTTTTATAAAGAAGGGCCACGAGACGGCTGCGTGTTATTTGCTT  
ATAGTTTCACGGAGCCCTTGTCAGGAAGCTGTGCGGTCCGTACGGCAGA  
AAGAGCTGGAGCGACGCGTCCGCCAAGAACAATCGGGCGTTTCTTCTTGC  
CCACCTTGCTCCCGCGCATCTGCCGAAGGCAGGGGAGACAAGGAGAC  
GCCTTCTATGCCGGGATTAATCAAGGAACCGAGTGTAACCTCGAAGGTAC  
ACAGGCAGGAGCTGAGGCCCAAGATGTGGTAAAACCCGTCCAAAGCCA  
CAAGGCAAATTAGTAAACACAGCCCCCTTGCCGAAGCCACCAATTCTAGG  
CACAAGGGACGGAAGCGTGCAACGGCCAGGGCCACTTGGAGCAGAGACCT  
GTAACCCCTCCCCAAACCAAGATGCGTACCCATCTTCCCAACGCAACGTG  
TCTGGGGGGCCTTGCCAGTCCATGGGTGCAGCACCCAGGGCCACACACAA  
AGGGCAGAGTGGCGTGGGCCCTTGACCTGTCACCTCCCCAAGATATAAAC  
TGCTTATACCAGAGTCGGCCTCAGGCCAGGTGCCGTGAATGGACGCTTCT  
GACTGTGCCGAAGGAGAAAAATCCACGTATGTGAACCAATCACCGGTACA  
TGTTACATTGTTCATGCAGACATGAGGGGAAGGGAAAGATTGGGTAAAAGC  
AAAAACAGAGAGTGAGTTTAACCCGAGGAATGACTGGACAGCAATACTGG  
ATTCTAGGGTTCTTGCCCCCTCCCGTGAGTGTCACCTAAGTACAGGGA  
GAGGGACACAGCCCCTCGGGAAGGTAGTGAAGTGCAGGTTGCAGGGAAGA

GTGAGGGCTGAGTGAGACGAGCCCACTGCAGACCTCAGGAAGGAGGACCA  
TCGGGGGCACCTCGCTGCACCCCACTGCTGTCTGTCCACTCAGGCCAACA  
GAGTTCGGGGGGCTGGTTACACTTGCCTGCACGTCCGAGGACACAGGCCA  
CCTTCACATAGTCACCGCACTTAAGCCAATGGAAGCCCAATCTTGCGCTT  
CCCAAATCCTACCCTCTGCAGCCCAAGCTCTGGGCTTCCGAGAAGAAAAC  
CCAAAGTGGAAGTGGAGCTCTGGACTAGAAAGTGGAATTTTTTTTCTCCCA  
AGTTATATCCAGCGACATTGGAGCAGAGAGACAATGGCAGCCGAAGCACA  
TAGAGCCATGAACATGCTCTCCATTTCTGTAATGCTTGCACAGTTTTATT  
TTTTTTTAAAGAATTTATTTATTTATTTATTCATGAGAGACAGAGAGAGAGAG  
AGAGAGGCAGAGACACAGGCAGAGGGAGGAGCAGGCTCCATGCAGGGAGC  
CCGACATGGGACTCGATTGAGGTCTCCAGGATCAGGCCCCGGGCCGAAG  
GCAGTGCTAAACCGCTGAGCCACCCTGGCTGCCCCCTGTTTACACAGGTTT  
TGTTTTTGTTTTTTGTTTTTTTTTTTTCACACAGGTTTTAAGCCAAGAAGAGG  
CAAGCAAAGAAGTGGGAGGAAGAATCCAAGATTCAGTCCACGCGATCCGC  
AAACTAGACACACCTCGACTGCCACCCCTCCCCAACCCCAAGGCCACACA  
GGCTCCATTCTCCACTTTCCCAATGACATCCTGTGAGCAAAGGACAGAGC  
ACGTGGTGGCTAACGGGAGCGCGGCCCAGATGGCCAAGGGTCTCTCACCT  
GCCCTTAAACCCGGGCGGAGGTGACGTTGGCCCCAGCCCTGGACGACTCTG  
TCCAGTTTCCAAGCACAAACATCAGAAGGGCAGGCCGAGCCGCAGGTGTGG  
TGTGAAAGCTCAGCTCAGCTTTGAGCTCAAGGAGTAAAGCGCACAGAACA  
CCATCCGGGGGATGAAGGGTCACAACCCTTCAACACAGCATTTCATCGG  
AGGCCCTCCATCGTGGGCCAGTCTGCCTCCCTGTCCCGCTCACACGTGTGC  
ACCCAACCTCATAAGGTTCTCTAGCGAGGATGCTAGACCACCCCTGAAT  
CACCGCTCTAAATGCCAACGATCGCAGGAGATGGAAAAATGCGACGGGACT  
CCACCTGGGCGGGCCGAGGCCTGAGCATCCCTCCCGGGATTTCACAACA  
CGGGGACTGATGACGTCGACGCACGCCCCGGGACACGGGCATCTCCTAAGT  
GCACAGACTCAGGACAATACTGGAGGGAAATGCAGGGGTTTAAAAACGAA  
ATAGACCTGCGTCCGGATCCCGACTCCACCCTTGCCAGTCGGGAGCTGGT  
GCGCAATGACTTGTAGCTCTTCCAGCGGGATTTTACACCTGCAGGGAGCA  
ACGGGAGGATGGCAAGACAGGAGGGGGAAGGCGAGGAAAGGCCTGGAACC  
CGGGGAGCAGTTAGTGATCGTGTTTTCTCGGGGTAACCTCTAGATGAACC  
TTTCCATTAAATTTGGTGTAATTTGTTTTAACTCTTGACTTCACTGAGAA  
GGGAGAAGGAAACGCTGTTTTAACTTGTCCGTGGTAAGGAGGAAGAGGG  
GAAGGATGAATCATCGCTATCGAGATGTTATCAAGTCCATGTGTGACTTT  
TGGCATTTTCCAAAAGAAGCTGGGACGCAAGCTGGCAGCCAGAAGCCAGG  
TGGATGCCGTCTATGTGCCAACCTGGAAGCAGATCAAGGTTGGGCTCCAGG  
AGGGCAGGGTGACTTCGGACAAGTGACTTAACTCTTGGGAGTCTCAGCTT  
GCCCATCGATTAAATGGGGGCAATACTGAACGGAGCAGCTAGCACACGTC  
CTAGGACATGCATCACTTGAAGACACGACAATCACCCCTCTCCTCCACTG  
CACCACCCTTCTTAAAGAGGCTATTCACATTCCAGCTTCAGAGCAGAAAT  
AATTTATCGCCATGATAATGAACCTTTTTCTCGCAATAACAAATGAGGC  
CAGCTGGGAGCACCTGCCAGGACAGCATGGCTGCCTTTAAGAGCTCACAC  
GACCCATGAGCATGAGTCACTGCTCCCCAGACAAAGCCTACCTGTGTAAT  
GTGCGGACAAAGCAAGCAAGGAGGGCCCCCACCTGGAGCTCAACAGCCTG  
GAGAGCAAAGCCATCCCTCTAACACGGAGCCCCCAGAAGCTGGGCCACAA  
GCTGGCACCTGTACCTGTGAACACATTGGAGCCATCTACATCAGTCTACG  
TGTGTGGCTGCTCCAGGTCGAGCCCTCTGTCTGGTCTGACTGGGTGCTCA  
GTCTCCTCCCCAGGAGCTCAGCGAGAAGCCTGTACAAACCCACTAGCCCC  
TGTTCCCATCACTGGGCTTTTTCACACCAGGAATAGGACAGGATTTGCCTC  
TGCCAGGTAGGCCAGGAGCAACATCCCTAGTCTGGAGGTGCTCAGAATGG  
GGGAAGGTGTTTTCTTCAATTTTAAAGGAATCTCAGGCAAGAGCTGCCAT  
TCCAAGCATCAACTGGCTATGCAAGGTAACAGCCCTTTCATGCAGGTAAAT  
GAAAACCCAGCCGTGAGTGATCCCTGCAAGGCTGGTCTTGGAGATCCCA  
GAGCCAAAGCCCTAGCTCCCTGATGGAGCAAGATGATGTCCCCTGAAAAA  
AAACAGACTCTCGGGTTTCAGAGACTCAGAGGAGGGAAGAAGTGGTAAGGT  
TCATCCATTTGCCACCTGTCACTGAGCATTACCATACTTTCCACCCTCC  
TAGGTCCCTAGCTAGACAGTGGGAAACACAATCAATTCCCTGCCACCAT  
TCGTTCTGGTGGATTATCCACTGGTCCAATTCATTTCGTAGCAAATCTGAT

ATTTCTCTGTATCCCGCCCTGCTCCTAAGGCCCTAATTTCCGTCTGCACA  
TCCCACTGGCTCTGGGGAGGGAAGCTGCCTCGACCCACAGATCAGCTGTG  
AGGCATGTGACCAAGGACAGCTAATCAGGGCATCCACCTCTTGGCACAC  
GGATGGATCACCTCCCAGGGGTGAGCTCCACAGGGTCAGCCCTCTGGAA  
AGCTGCGATCAAGGCATTCTCTTACTCTGGGTCTGTGGAGGCAGGGGTCT  
GCAATACTCCTGCCGTTCTGCTTCTACTGGGAAAGTAAAACACAAGAAT  
GAAACGAATTGGAGAAGAGCACCTAGGTGGCCCAGTGGCTGAGCGTCTGC  
CTTTGGCTCAGGTCTGTGATCCCAGGGTCTGGGATCGAGTCTGCATCAG  
GCTCCTTGACAGGGATCCTGCTTCTCCCTCTGCCTGTGTCTCTGCCTCTCT  
CTGTGTGTCTCTCATAAATAAATACATAAAATCTTGAAAACAGATAAAAA  
AGGAAAAAAAAAGAATTGGAAAAAAAAAAAAACCAGAGAGCCCAATCACCC  
CCCAATCACCCAAAAGCATAATGCATAGACTCTCCAGTCAAATTAACAA  
CCCAAACTTGATTATTTAAGCCATTAGAATTGGTTTCTCTGCAATTTG  
CAACCAAAATCACTCAACCTAAAAATAGATTTCGTTTTTTAATGAATGAGG  
AATAGAGCCCAGAGGGGCCCCGGTGACTCATACAATGTCACAAAGATGTTG  
GTGACCGGGGCCAGGATGGGACCCCAGGGTTGGGCACGTGTTAAGACCCGA  
GTCTGAACCACGGCTCCATCCTGCAAAGCTCTGGCGTCTTAAGGACATTG  
CTTAAAGTCTCTAAACCTTTTAAACCTCTGATGTCAGAGATGATGATGCC  
CACCCACAAGCAGGCCTATGAGGATGAAGAAAGAGACGCTGGAGCCATCT  
GCTCCCAGCCTGCAGAAGGCGGGCTTCTCTCTCCTTCCCGACGTAACACT  
GCTGCTCTGGCAGCCGGCACGGGTTGGCGGCTGTATTTGTTGAACCTCA  
TCCAGGGAGGCAGAAGGAACAGGGCAAAGGCCTGCTTTAGGGCACAGGTG  
ATATCAAATGGCCATTCTGACCACCACCCATGAAGGCAGCCACACAGGCA  
TCTTCCCCAAGTCATCTTCCCCCTACAGACAGATGCCAGGATGACCAGGAC  
AGAGAGAAAAGAATCTGGAAACGAGGAAAGGCTTTAATTCAAGTACAACAT  
GAGGCGGGTGGAGGAGGAGGACAGGATACAAACAGGTCAGTGGAAAGTGA  
CCAGAAAACAATTCCGGGAAAGGCGGAAAAGCCAGTGGCCAGGGTGGAA  
TTAGAAACTGGGACCATCTCAGCTCTTTGGTTAACCACATTCCTGGTTTC  
TACTAAAGAAATTTAATTA AAAAACC CAACATCTAAATTTCCCAGCTGGC  
TTGCCAGGGGCCACGGATGCCCTCAGATTGAGAGAACCTCCGCCAGGGT  
GACCTGGGGGCCACTAGACGTGTCCTGTGTGAAGTCAGAGGAGGAAGGGG  
TCACAGGCCCGGGGCCGGGGTGGGGCGATGCCATAGGCAGGCACCTCCTCC  
CTTTCCCTCCGAGAGAGAAGAAAGCCTCCTCCTCGAGCTTGGGAGCACCC  
TGTTCTTTACCCCATCCACAGGAGTAAGAACTTTGGTCTTGTGTGCTTC  
GTTTTAAAAAATAAAAAGAAACATCAGAATGGAAAAAAAAAAAAATTGAAA  
TGAACTAGAACCACATTGATGCTTCCAGGGACACGAGGTCGCTTTCT  
GTCTGCAGACACAATCGGTCCCCAGGCCACTAAGACCACTTCCTGCAAAC  
ACCTAACCCCCGCTGAGGCTGGATGCACGCTGGGGATGTCCAATAACCAG  
CCGGAAGAGTGTGAGCTTTGGGGGATCACACACAGTTTCAGGAAAAAAAA  
CCCGAAGAGGGAGCTGGGCAGCTGGGCATTCTGACCCAGCCTCGAACCCAG  
GGCTCTCCACGGGAGCCGAGACGGAGATCTATCACGGCACACGGTGCTC  
CAAAAGATGTTTCTTAACCCATGTGGCTGTGCAGAAGAGTTTCATAGAAA  
AGTTAATTTTTTTTTTCCCAAAAACAAAACAAAACAAAACACCGCCAG  
CAAACCTCATATATGAAATCTGGCCACCTAAAGAAGGCTCCCCCTGGAGT  
TCCCTCCAATGGAGACACCAATCTCCATCTTCCCAGCACCCACCCACC  
CCCATTGTACCAACACTTCCAAAATCCTCCTGTGCACGGTGTGTGCCAG  
GTGAGGAGTCAGGAGCTGGCTCCTCTGGGTGAGTGTCCACCTCCGGCACA  
TCCTTCCCTCACCTGTGCCTTGATAACCTCTTCCGTAAAAATGGGGAGGAC  
ACCTGGCTGTTTTGCGCGGGTGGGGGTGGTACCAGACGACAGGGACAC  
AAAACCACTTGTA AAAA ACTCCCATGGCAAATAATCAGGATGGAAAGAACT  
CACTAGATCATCAATCATTTTAATGCACAAAGCCGACTTGGGCCGAGCGC  
TGCCACGTAACCCCACTGCTCCTCATTTCCCCGGGGTGCTTAGCTCCC  
AGGGAAGATTCTCCCTGGGAGAGAAAAGGAGATCCACAGGCATCCCCGAG  
TGTA AAAC CAGGGTGGGAAACATTCTCACC GTGGGGGTCGACCTGCCTTT  
ATAATTAAAGTGCCACTTCACACTCGGTGGGATGGCTGTGATCAAAAACA  
AAAGCCAGGGAGTGAGTGGGGAAATCCAAACTTTTTCTGCCTCACTGCTGG  
TGGAATGTGAAATCTGCAGCTGCTTTGGA AAACAATCCGATGGTTTCTC  
AAAAAAAAAAAAAAAAAGAAAAAAAAAAGTAAAGAAAAAAAAATCACACATG

AGATGACCCTAGAGTCCAGCAACCCCACTTCTGGGCATAGGCACAGAAGA  
CCTGAAAGCGGGGACACCAACAGGTTATTTGCACACCCATGGTCAGGGCG  
GCAGTGGTCACAGTGGCCACGAGGCGGAAGCAAATCCAAGTGGCCATCGA  
TGGACGGGTGGATAAAACAAAATGCGGTCTCCGCACGGTGGGAAGGTTTTA  
AGCTTTAAAATGGGAAAGAATTGGGACACCTGTTACAACATGGGCCAACCC  
TGGGGGACGTGATGCTCAGTGACGTAAGGCAGACACGGGAAGGACAAATG  
CTCGTCCCCGCACTTCCGCAAGGTCCCTATCGATGGAGACACCAGAATG  
GTGGCCGCTGGGGTGTGAGACAGGGGGACAGGGAGTTGGTGTGGGAGGG  
CAGAGAGTCTCGGTGCGGGTCTGGGGCTGCTCACCAAGCTCTGGAGACGGA  
TGGATGGTGGCAGGACGGAGAGGCAGCGTGAGCGCCGTTAATCGCACCCA  
TAAGAAATGGTTACCCTGGTAAAATCTGCCACCATAACAAACAAAAGGTG  
AAAAATGTTTTAAATTAGCTAAGGGAGGGGGACGCCTGGGTGGCTCAGTGG  
TTGAGTGTCTGCCTTCGGCCAGGGCGTGATCCCGGGGTCCCGGGATCGA  
GTCTTGCATCGGGCTCCTTGCAGGGATCCTGCTTCTCCCTCTGCCTCTGT  
CTCTGCCTCTCTCATGAATAAATACATAAAATCTTTAAAAAAAATGAG  
CTAAGACAGGAAGGTAGGACAGCCGAAACAGTCATGGTCCCGGGAGCTCC  
TGAGGCTTCACCCACACGCTGAAGGTTGGGCCCCCGAAGGCCAGGCTCT  
CGGAGACCTCCCTTCCACACCCAAGAAGCGCCGAGAACCTTCCTCCGC  
AAAGTCAGCGAAATCAAGCGCTTCCCGCCAACCCGAAGGCCACGGGAGAA  
GGCGGCAAGGGGCTGCGGCAGTGTCCAAGGAGGCGTCCAGCAGGCACTCA  
GCACCTGCAGAAGTTGGGAGGGAGGCAGGGCGTGTGCTGGCGAATGACGG  
GCCACGCGCCGACGGTGAGGGTAATGGGACAGGACGGTCCCTCGGTGGCT  
CCAGCCGGGCGCGGGCTGACACGGGGGATCTCGGGCCGGCGGAGACGCTC  
CGTCTGCCCCGTCCCTCTCAGGCTTCCCGGCCAGCCCAAGGAAAGCACA  
GACCACTCTAAAGTGGGACAAGGTCACCCTGCAGGACATGCAAGGGGGTG  
GAGACCACACCACAGCTCCCGTAAGGGCCATTTCCCAAACGACGGTGGG  
GCCTGGCGAGGCGGTGGGCCAGGAGGTTGGGGGGGGGGGAAGCTCACA  
GACCCAGGGGGAGACTGAAGGCTGACTCATCTCTACGGACCCAGAACG  
TTATCATCCGTCCCAACGCAGCCACTTCTGTCTCAACCAACTGCAAAAAA  
AACACCTGGTTTCGAGATTTCTATGTGAAAACCTGTACCAACAAACCAA  
TGCGGGAGGAGGCGATGATTCACATCACAAACAGAATGCTTAGACAGAAA  
CCAGCCTTTTCAGCATTCTGCGCTTGATGCTTCCCTCCAGGCCTTTTCGC  
ATGTCACGTGACCGACACGATTGGTTCCGTACAGACCTTTCTCCAGGTG  
CAAACCTAGTCCGCAAAGCACGTGATTCTGAACAGGGCGTCTCTAGCCAA  
CGACACGGATCAAAGTGAGCACATTCTGTCAGGACCTTTGTCTTGCTCGT  
GGAAAGTGAGCTGGGAGCATGTGCCACATGAAGAACGGGGGGCTACCTGGC  
CGCGGAGGACCCCGACCAGCTCCGTGGGGACGGTGGACATTGCCTAAGAC  
GACAACGTCCAGAAACAGGAGGAGCAGTGGTCTGCGTGGGCCCCGACTAAC  
AGAAGCAGCGGGAAGCTGCCTATCGCGGGGCCTCTTCTTCCAAGCTCCCC  
GGGAACCTCGCAAACCCAGGGGTAGAGCCTGCAGATCTAAGTCGTCCCCAA  
AACCACAACCTGCCCCAACCTTATCATCCAACACAGCCATTCTGTCTCT  
AACCAAGCACAAAGGATACCTGATTGCCAAGACTCAGATTTCAAAGATG  
TACCTACAAACCAATAAGTGACAGTGAGGGCCCCAGCCCGGTGGAGGTA  
GGCCTGGAAGGCTTCTGGAAGAGAGAAAAGATGGTTTTATGGCTGGGTA  
AGCTTCAGCGGGGGGGAAAGTCTCAATGCAGGGTTTTGCTGGCCAAGAAA  
TCAGTCAACACCTGATCCTTAAAGTGTCATCTGTACTGGAATGGCCTG  
GGGAGCCTGTCAAAAATGCAGACCCCCAGCCCCACACATACCCAAACAG  
AGCCTCTAAGGCAGGGGAGGGCAGGATGGCTGCTGAGTGCTCATGAAGAG  
TACTCCTTCTTCTCAAGTTCCCCAGGCAATCCATTCTCGTGCAAACCACA  
ACTTGGGGAGACTGGGGGAGCGGCCAGCGAACAGTCTGGACCGGGCCCA  
CGTCCAGCTAGGGGACAGCAGAGGCTCCTGAGAAGGGAGGGCCACAAGG  
AGTCACTGAGGAGAGGGACAAGGCAGGTGTAGACAGAAGAAGCTGTTCCA  
GAAGTAGAGGCAACATCCCCAGCCCGTCTCCACCAAGACTTCCTGTTAT  
GCTCCTCGCCGAGCTGCCGGTTACGGAAACCGTCTGGGCCCGTGTGTGC  
GCACCGGGGATGGTGGGGGGGGGGGGGGGACGGGAAGGAGAGGATGAGT  
ATCCTCCAGAGCTCAGGAGGTCTAATAGGAAGGCGGGAAGGGCTTCAAAG  
AGGAGGAGAAACATCCACGCTAGGCGACCAGACCCCCAACACCCCCCA  
AAACTCTCTCTGGACAACCTGAAGTCTGTTGTGTGGAGACTCAAGTAACTC

AAAAC TTCCTGATCCCGAACAAACATCACCTCCACTCGCTCTGGGCAGCC  
GCCCCAGCAGGAGGGGACGGCCCTAACTCGAGCATACGTAGGCTGTTGA  
CGACACTGAGGCTAACGTGGTCTCTGCTGGAGGCGCAGAAGGGCCTCTGC  
CGTGGGCTTCCTCACTGAACGCAGGTCTTCCTTCTCTCATGCAAGGACAC  
TCGGGCCTCCATCCACATCAGCCACTTCCAAAACCCCTTCGGGCTGGCTC  
TCCGCAGCCCTCTTGGGTGAAAGAAGCCCCCTAAAGAAAAGGGGGATCAC  
TCCCTGGCCCTTGGGGCTGGGCAATCCCCAAAATCCAGTCCGAGGTAAGA  
GTAGAACCCATTGTTTCCTTCAAACCTGCCAAGATAACCAGGAAACACGGC  
CTCTGCTGGGTCTGCACACTTAGCAGCCCGGCACACCTGCTACTCGGGCC  
GGCGTGAGTCACCCACACAGGCATTGCACGCCGGACTTGTACGACGCGGA  
TTCGGTGCTTGGCGGCTCGCTCTCACGCACACCGGATGTCATCCATCCAC  
CTACCCCTTGGAAGACGTGTCCGGACAGATCAGGCTATAACCCAATTTTT  
ACTCAACGACTCACTCCCAGTGGAGGTGTCTGGGGGAAGGAAGGAGGGGTA  
CACAGAGAAGTTTCCTGCCATTCCCGGCGGGGGCTCCCCTTTCCTCTGGG  
CCCCGTCTGGGTCTCAGCGGCTCCGCTGGCCATAAATAGGGAGGGACGAGG  
GGCAAGTCAACCTGGGCAAGAAAGTGGAAGAAGTCTCGACTCAAAAACCT  
TCTCCGGAATAAAGACGCTCTGCTGAGCTGAATAAGGCC TAGTGTTCTCC  
TGTACAGCGCAGCGTCCACAGTTAACAATACTGCATTGTACACTTAAACA  
TTTGCTAAGAGGGAAGATCTTCTGGTAAGTGCTCTTATCAACAAAATAAT  
AATGATAATAAAGAGGGTGGGAGGGAAC TTTTGGAGGCCACGCAGGTTTA  
TGGCCTAGGCTGTGGTCAGGGTCTCACGGTGTACACTCATTACCGAGCTC  
ATCAAGTTGTATACGTTAAATTCGCACAGCTTTGTGTATGTCAATCACAC  
CTCAATAAAATGGTTTAGGAAAAAAAAAACAAAGAGGAAGAAGAGCATCTC  
CTGAATCCCTCTCAACTCCCGCTTTTTTTTTGTACGTCAGAATTTTCTGC  
AATGCAAGATTCTGAATCGGCTCCTGAGCCCGGTAAAGGACATCAGCGGG  
ACCTTAGGAGAAATCGGAATAAGGCCCAAAGAGGAGTTCAAAGTAGTCTG  
TGAATGTTAATCCCCTGGCTCTGACCACCTCGCTGTGGGTATGAAAAATG  
TTAACATT CAGGGAAGCTGGGTAAAGAGTATAGGGGAAC TCCGTGTACTA  
TTTTTGTGACTTTTCCTGTAAATCTAGATCTCTATCAAAATCAAAGTGAA  
TTCTTTAAAAAAAAAAAAAAAAAAGGACAGCAGTTTTAATCCAGCCGCTA  
CTAAATCTTCACCTGTGGCCTTGCTAAAATAATTTACAAGGTAGTCGTGG  
ACGCAAAGCATAAGTTACTCTCATGCCAATGCTGGCCTCAGGAAAACCGA  
AATGAACGAAACACTGCATTTACTCAGCAAGTGTCTTCCAGCGCCCACT  
GTCTTCTGGCTCCCAGGTGCCAGAAGGTGTGTACGGATTAAAGTGGGGAT  
CTCTTCTCCAAGCCCAGCTCCGAAATGTCCACCCAGAGGGGCATTTCTC  
CAGCTTCAGACATGACTCTGACTTAAAGCAAAGACAGTGATTTCTGGTAA  
TTTTCCAAAGGAAATAATCCAAAGGGTGGACAAAGCTTTGTGTAGAAAAG  
ATGCTCACCGAGGCTCTACTTCTAAGGGTAAACATCTAGAAATACCTTCG  
TGTCCAACAAGAGGGGAATTGTCAGATTAGGATTTGATGCCGGCAGAGGA  
ATACAGCCATTACCTGGGGAACTGTTCAAGCAAAATCGAGAGGAAAAAAG  
CAGTAAACAAAGTGTATACATTGCAGGGCTTCAGCAATGAGGAAATGCAT  
CAAAC TGCCAGCACTACTGGAAGT GAGTATTTTTTTTCTGCTTTTTTACAC  
TTTTTTTGTGGTTTTCTTTTACATTTTAAAGACTTTTTTTAATTTATTCA  
CTTGAGAGAGAGAGAGAGAGAAAAGGCAGACAGAGCCCCAGCAGGGGGAGA  
GGCAGAGGAATAGGGAGAAGCAGACCCACACTGAGCAGGGAGCCCGATG  
TGGGGCTCGATCCCAGGACCCCGAGATCATGACCTGAGCTGAAGGCAGAC  
CCTTCAGCGACGGAGCCACCCAAGCCCTCAAAGAAGAGAGAGAACACGG  
AATACTTTTAAAATCGAGTGAGGTGCAGAGGTGGAGCTGTGCGTGAATGG  
TGGGACAGTTTAAATATTTCTCTCTGGGGGCGGCAGGAGGCTGCCAGGGG  
GAGAGGGTGGGTATAAAGGCCACAGGAAAAGGTGCTGCGTCAACCTGAGC  
ATTTCCAGGGACTTGGGTGCAGCCAGAGGCACAGGCTCCAGGGGGGAGGG  
GACAGTACTAACACAGACCACCTCTTCTCCTCTGCGGTGCCTGGCCCTC  
CCTCCTTCCCCCACCCCCAGCAGGTGCTCACTGGAGGCACAGCACCTGA  
GAACACCCCCAGGGAGGCCCCCTTGACAGCTTCCAGAAGTTGTCTTTGCA  
GGAGGGACTTCTGGGCTGGAAATGGATCATCAGGGACAGGCTGCCAAGGT  
TGGGGGGGGGGGGGAGTGAATCCCACATCTGGGAAAGCATCACCAGGAAG  
CCCATCTTCCGGGTTGGGGGGGGGGGTGCTCTGGAGTTGAGCCCTAGTGG  
CAAGGAGGGAGAAGGTAAAGGAGACCCCGCTTCTCTGCACATCAAGACG

GACTAGCTCAGTCATTTCATTCAACAAACATCTATTGGGTGCGCCACTCAG  
TGACAGGCACGGGAGCTGCCCCAAACCGTGGCCTGGGCGGCCGACACAAA  
AGGACAAGGAGAGGATGCGGCTATAGATTAAAACTGGTTTGTCTTTAGCT  
CAGGGTTCAAGACTAAGCCCCCTCCCCACGCTGACCTGGAACCCGGTGCA  
TGCACAGCGGACGGTGGACGCGGTGCCCCGGGATCCTGCCGTCTCCCATC  
CTTCGGGAAGCCTTGCCACAGCACCTGGGTGGGTGGCCCTGCAGTTAA  
GCCGCTCACCAAGGCCCGGCCACAGGGACCTGGGGAGACGCCGAGCCCC  
CCACGCAGCCCGCCGAGTCTGGGTGCGCGAGGCGGCAGCGCTCCCTCCC  
GGGGTAACGGGCCCCGGGGCGGCCACGAGGGCGGAGGTTAGGGCGACGGG  
CCCCCACCCCCACCCCCACCCCCACCCCGGCGGAGGGTCTGTCCCGCGG  
GGGGCCGCCCGAGGGGGGGCCGAGGGGATGTCTCTGCGGAGATGTCAGTG  
CGAGAGCAGAAATTTCCGTGCAAACCCCAAGAGCTCCAGAAAGCGGCGCG  
GGGGGGGGGGGGGGGGGGAGGCGGGGAGAGAGGAGCGCACCAAACCCCTC  
CCTCGAAACGCAGGGAACACTTACCTGCCAGGTATGCGCCCCGACTGCCA  
GGTGGAAAGGAAGCAAGCCCAGGACGCAGACGAGGTGCGGGGGGTGGGGGT  
CGTCTGAGCCCGGCTGATGCACACCAAGTAATCCACGGTGGGGGGTCCGG  
AGCCCCCTCGCCCCATTCCCCGCACTTTCCACCCGAGGCCAGCCCCGGGCT  
GCGCGCTCCGGCCGCGCGGAGATGGCGGGAGCTCGCCGCGGGGGTTCCCA  
AGTGCCGCGTCCCGGAGCTCCAGGGCGCGCAGCCCCGACGCCGCGCCTCG  
CCTTTCTTTGCTGCGCAACGCCGGCGCGAGCCCCGAGGTCCCCGCCGGCAT  
CCCCCTCTGCAGGCCCGGACAGCGCCCGGGGCAGCTCGGCCCGCGGCCCGG  
AGCTCGTAGGTGCGCGGGGCCGGGGAGGCGGAGGGAGAAGCGCGGAGCGG  
CGGGCGGGCGAGCGGGCGAGCGGGCGAGCAGCAGCCTCCTCCGGCCCCGG  
CAGCCCCGCGCGCGCCCGCGCCGCTCCGCGCTCTGCCCCGCCGCCGGGCC  
ATTCGGCCCTTATATACCAGCCGGCCCCGGGGCGTGGCCGGGGCGTGGCC  
GAGGCGGGTGGGGGCGTGGTCTGGGCGTGGCCTGAGCGGGGCAGCCAGGG  
AGCCGCACTGCTTCCTGGGAAGTGTAGTTCCCTCCACCCATCCCAGCTA  
ATGCACAACAGCTGTGCGCATGGTTGCCGCTCGCCCTCAACAGCGGTGCC  
CCCTTGCGCCCTCCCTTCGCAGGGAAGGCTGGGATTCCCGCCTCGCTGTC  
AACTCCGTTAGATCTAGGCTGGTCCTTGATGCACAAGGTGGGGGACCTCA  
AGCCCCCTAAACGCCTCCCGCATGACAAGCCTGGAGTCAGACAAACCGA  
GCTAGGTTGCAGTCCCAGCCTGCCATGAACCGCCCGTGTGACCTTCAAGG  
AAGCGTGTGACCTGCGAGGCTGCAGAACTGAAGTCTGATCAAGAGCATG  
GCAGCCCCCTCAGATTCTTCATCGGAAGCAAAGGATATTAGAGTTTGCTTC  
CACCGGGTTGTAGAGGGAGGTGACCCCTGCACAACCGGGCCTGATCTCTC  
CGCCTCTAACACGAAGTGTAAATTTCTTAACGCTTGTTAAGTGTGGCAA  
TTTTGGTTTCGGGGTTCGGCTCCTGCAAACCAAATGCCACCTTGGGACCC  
TCCTAGAATAAAATTCTGGAGCTGCCATGGCCTTCATCAGGCTTCAGTTT  
CTGCAGCCTTCTCCTGGTGTATGGGACACCTGAGCAGCTGCACACCCTGG  
GAGCCAAAGGCGGAGTCTTCCTCAAGGAGCGCACAGTCAAGTGAGAGGC  
GACAGCGACATCGCAGTAACTATGTGGACACGCAAGGGGCTGTATGGACC  
AGGGCACCTAACTGTGCATGGTGGGGGGCATGCCAAGGCAGCCAGAGGG  
CTGGTGTCTGAGTGGAATCTGGAAGGAATGGGTAGGAAGTAGCCAAAGAG  
ACACGAAACAACAAGGCAGGCAGACAGCTGGCTGTGCGGAGAAACTGTG  
AGGGTATAAAAGAAGGAAACAGGGAGGGAGACTCACTGCAGAGGAGGGGA  
AGGGTCTTGTATTAATTTCTAGGGCTGCTGTACAAACTGGGTGGCTTAG  
AGTGACAGATGTTTATCATCTCAGAGTCCTGGAGGATTGTTACAGTTTTG  
CATACGTGGGTTCTTATCCACACACATTCCTCCAGACAATGACCCCCCAG  
CAGTAATGAGCATAGATCTGTGGTTTGTCTTCTCATACCGCTGTCCAATA  
AGAGGAACCAGGGCTCCTCAGAGAAATGGCTGGTTTTAGGATTGGGGTAG  
GAAATATACAAGATGAGCCTGGAGCATCTGGAGTGCCAGAAAGTAAGAAA  
GTGTGAACACACACACACACGTCACATGTATACACACACCCCTCACAT  
ACAAGGATAAGGGTGCATCAAAGGCATACAGAATCCCTATGAATTCGGCC  
TGAGATTTTAAAGAGAGACCAGCTGGAATGCTACAGTGAGAAGAGTTCGTG  
CATCTATCAAGGTAGGAAGACGGGGAAAAAGAAATAAAGAAACAAAGGCC  
TCCAAGGGGAGGGGCCCCGCGAGGAGCCGGGCTGAGGCCGGGGCGAGTG  
TCCCCAGGACAGGAGAGCCCCGTCCCGGAGGAGCAGGAGCTGCACCGACC  
TTCCCGGGCGGAAAGGGGCTCGCAGGGAGTTGGAGCAGGACCCAGGAGGG

CGAGGATGCCCTCGGGCTCCCCGGGACAGTAACAGCAACTGCGCGCCCAG  
GAGAGTGCGCCGAGCTCCCTAAGGGCTGCAGCGGCACGGCGGGACCCGG  
CGGGACAGGCGGGACCCGGAGCAGCTCGGGGGGCTCGGGCGGCGGCTCCG  
CGGAGGGGGCTGCGCGGCCCCAGGAGCAGCTCGGAGGGGCTCGGGCAGAG  
GAAGAGGCTCCGTGCAGAGGGGGCTGCGCGGTTCCAGGAGCAGCTCGGAG  
GGGCTTGGGCGGCAGCTCCGCGGAAGGGACTGCGCGGCCCGGGAGCGCGA  
ATCCACCAGCGCAGGCTCCGGAGCACAGGGCGCCGGGACACAGCCCAGGA  
TCCGGCCTCCCCCGGGACAGGCAGAGGCCGGGAGGGGCCAGGACAGCAAG  
GACGCTCCTGCCCCAGCTGAGCAGATCAGCGGCCCGCCCCGAGCCTCC  
AGGCCCTGCAGACGGAGTTCTTGCCTGAGCTGAATCCAGGTTTCCAGAGC  
TGCTTCGCCACTGGGGCTGTTCTCTCTGCGGCTCAGGGGGTAAACAACC  
CCCACTGAGCCCTGCACCAGGCAGGGGCACAGCAGCTCCCCCACTGCTA  
ACACCTGAGAATCAGCACAAACAGGCCCTCCCCAGAACACCAGCTAGAC  
TGACAACCTCCAGGAGAAGCCAAGGGACTTAAAGAACACAGAATCAGAAG  
ATACTCCCCGGTGGTTCTTTTTCTGTTTGTGTTTGTGTTTGTGTTT  
GTTTTGTGTTTGTGTTTGTGTTTGTGTTTGTGTTTGTGTTTGTGTTT  
TTTTCTCCTTTCTTTTTCTTTCTTTTTCTTTCTTTTTCTTTTTTTTTTCG  
TTTTTTTTTTTTCTTTTTCTTCCCTTTTTTTTTTCTTTTCTTTTTCTTTC  
CTTCTTTCTCTCCTCTCTTTTTCTCTTTTTTCCCAATACAACCTTGCTTTTG  
GCCACTCTGCACTGAGCAAAATGACTAGAAGGAAAACCTCACCTCAAAAG  
AAAGAATCAGAAACAGTCCTCTCTCCCACAGAGTTACAAAATCTGGATTA  
CAATTCAATGTCAGAAAGCCAATTCAGAAGCACTATTATACAGCTACTGG  
TGGCTCTAGAAAAAAGTATAAAGGACTCAAGAGACTTCATGACTGCAGAA  
TTTAGAGCTAATCAGGCAGAAATTAATAATCAATTGAATGAGATGCAATC  
CAAAC TAGAAGTCCTAACGACGAGGGTTAACGAGGTGGAAGAACGAGTGA  
GTGACCTAGAAGACAAGTTGATAGCAAAGAGGGAAACTGAGGAAAAAGA  
GACAAACAATTAAAAGACCATGAAGATAGATTAAGGGAAATAAACGACAG  
CCTGAGGAAGAAAAACCTACGTTTAATTGGGGTTCCCGAGGGCGCCGAAA  
GGGACAGAGGGCCAGAATATGTATTTGAACAAATTCTAGCTGAAAACTTT  
CCTAATCTGGGAAGGGAAACAGGCATTTCAGATCCAGGAAATAGAGAGATC  
CCCCCCTAAAATCAATAAAAACCGTTCAACACCTCGACATTTAATTGTG  
AAGCTTGCAAATTCCAAAGATAAGGAGAAGATCCTTAAAGCAGCAAGAGA  
CAAGAAATCCCTGACTTTTATGGGGAGGAGTATTAGGGTAACAGCAGACC  
TCTCCACAGAGACCTGGCAGGCCAGAAAGGGCTGGCAGGATATATTTCAGG  
GTCTTAAATGAGAAGAACATGCAACCAAGAATACTTTATCCAGCAAGGCT  
CTCATTCAAAATGGAAGGAGAGATAAAGAGCTTCCAAGACAGGCAGCAAC  
TAAAAGAATATGTGACCTCCAAACCAGCTCTGCAAGAAATTTTAAGGGGG  
CCTCTTAAAATTTCCCTTTAAGAAGAAGTTCAGTGGAACAGTCCACAAAA  
ACAAAGACTGAATAGATATCATGATGACACTAACTCATATCTCTCAATA  
GTAATCTGAATGTGAACGGGCTTAATGACCCCATCAAAAGGCGCAGGGT  
TTCAGACTGGATAAAAAAACAGGACCCATCTATTTGCTGTCTACAAGAGA  
CTCATTTTAGACAGAAGGACACCTACAGCCTGAAAATAAAAGGTTGGAGA  
ACCATTTACCATTGCAATGGTCCTCAAAAGAAAGCAGGGGTAGCCATCCT  
TATATCAGATAAACTAAAATTTACCCCAAAGACTGTAGTGAGAGATGAAG  
AGGGACACTATATCATACTTAAAGGATCTATTCAACAAGAGGACTTAACA  
ATCCTCAATATATATATGCTCCGAATGTGGGAGCTGCCAAATATATAAATCA  
ATTATTAACCAAAGTGAAGAAATACCTTAGATAATAATACACTTATACTTG  
GTGACTTCAATCTAGCTCTTTCTATACTCGATAGGTCTTCTAAGCAAAAC  
ATCTCCAAAGAAACGAGAGCTTTAAATGATACACTGGACCAGATGGATTT  
CACAGATATCTACAGAACTTTACATCCAAACTCAACTGAATACACATTCT  
TCTCAAGTGCACATGGAACCTTCTCCAGAATAGACCACATATTGGGTAC  
AAATCGGGTCTGAACCGATACCAAAAGATTGGGATTGTCCCTGCATATT  
CTCGGACCATAATGCCTTGAAATTAGAACTAAATCACACAAGAAGTTTG  
GAAGGACCTCAAACACGTGGAGGTTAAGGACCATCCTGCTAAAAGATAAA  
AGGGTCAACCAGGAAATTAAGGAAGAATTAAAAAGATTGATGGAACTAA  
TGAGAATGAAGATACAACCGTTCAAAATCTTTGGGATGCAGCAAAAGCAG  
TCCTAAGGGGGAAATACATCGCAATACAAGCATCCATTCAAAAACCTGGAA  
AGAACTCAAATACAAAAGCTCACCTTACACATAAAGGAGCTAGAGAAAAA

ACAGCAAATAGATCCTACACCCAAGAGAAGAAGGGAGTTAATAAAGATTTC  
GAGCAGAACTCAACGAAATCGAGACCAGAAGAACTGTGGAACAGATCAAC  
AGAACCAGGAGTTGGTTCTTTGAAAGAATTAATAAGATAGATAAACCATT  
AGCCAGCCTTATTAAAAAGAAGAGAGAGAAGACTCAAATTAATAAAATCA  
TGAATGAGAAAGGAGAGATCACTACCAACACCAAGGAAATACAAACGATT  
TTAAAAACATATTATGAACAGCTATACGCCAATAAAATAGGCAATCTAGA  
AGAAATGGACGCATTCTTGAAAGCCACAACTACCAAACTGGAACAGG  
AAGAAATAGAAAACCTGAACAGGCCAATAACCAGGGAGGAAATTGAAGCA  
GTCATCAAAAACCTCCCAAGACACAAGAGTCCAGGGCCAGATGGCTTCCC  
AGGAGAATTTTATCAAACGTTTAAAGAAGAAATCATACCTATTCTCCTAA  
AGCTGTTTGGAAGATAGAAAGAGATGGAGTACTTCCAAATTCGTTCTAT  
GAAGCCAGCATCACCTTAATTCCAAAGCCAGACAAAGACCCCGCCAAAAA  
GGAGAATTACAGACCAATATCCCTGATGAACATGGATGCAAAAATTCTCA  
ACAAGATACTGGCCAATAGGATCCAACAATACATTAAGAAAATTATTAC  
CATGACCAAGTAGCATTTTATCCCTGGGACACAAGGCTGGTTCAACACCCG  
TAAAACAATCAATGTGATTTCATCATATCAGCAAGAGAAAAACCAAGAACC  
ATATGATCCTCTCATTGGATGCAGAGAAAGCATTTGACAAAATACAGCAT  
CCATTCTGATCAAAACTCTTCAGAGTGTAGGGATCGAGGGAACATTCTCT  
CGACATCTTAAAAGCCATCTATGAAAAGCCCACAGCAAAATATCATTCTCA  
ATGGGGAAGCACTGGGAGCCTTTCCCCTAAGATCAGGAACAAGACAGGGA  
TGTCCACTCTCACCCTGCTGTTCAACATAGTACTGGAAGTCCTAGCCTC  
AGCAATCAGACAACAAAAGACATTAAAGGCATTCAAATTGGCAAAGAAG  
AAGTCAAACCTCTCCCTCTTCGCCGATGACATGATACTCTACATAGAAAAC  
CCAAAAGTCTCCACCCCAAGATTGCTAGAACTCATAACAGCAATTCGGTAG  
CGTGGCAGGATACAAAATCAATGCCCAGAAGTCAGTGGCATTCTCTATACA  
CTAACATGAGACTGAAGAAAAGAGAAATTAAGGAGTCAATCCCATTTACA  
ATTGCACCCAAAAGCATAAGATACCTAGGAATAAACCTCACCAAAGATGT  
AAAGGATCTATACCCTCAAACTATAGAACACTTCTGAAAGAAATTGAGG  
AAGACACAAAGAGATGGAAAAATATTCCATGCTTATGGATTGGCAGAATT  
AATATTGTGAAAATGTCAATGTTACCCAGGGCAATATACACGTTTAATGC  
AATCCCTATCAAAATACCATGGACTTTCTTCAGAGAGTTAGAACAAATTA  
TTTTAAGATTTGTGTGGAATCAGAAAAGACCCCGAATAGCCAGGGGAATT  
TTAAAAAAGAAAACCATATCTGGGGGCATCACAATGCCAGATTTCAGGTT  
GTACTACAAAGCTGTGGTCATCAAGACAGTGTGGTACTGGCACAAAAACA  
GACACATAGATCAGTGGAACAGAATAGAGAATCCAGAAGTGGACCCTGAA  
CTTTATGGGCAACTAATATTCGATAAAGGAGGAAAGACTATCCACTGGAA  
GAAAGACAGTCTCTTCAATAAATGGTGTCTGGGAAAATTGGACATCCACAT  
GCAGAAGAAATGAACTAGACCCTCTCTTTACCATAACACAAAGATAAAC  
TCAAAATGGATGAAAGATCTAAATGTGAGACAAGATTCCATCAAAATCCT  
AGAGAAGAACACAGGCAACACCCCTTTTTGAACTCGGCCATAGTAACTTCT  
TGCAAGATACATCCACGAAGGCAAAAGAAACAAAAGCAAAAATGAACTAT  
TGGGACTTCATCAAGATAAGAAGCTTTTGCACAGCAAAGGATACAGTCAA  
CAAACTCAAAGACAACCTACAGAATGGGAGAAGATATTTGCAAATGACA  
TATCAGATAAAGGGCTAGTTTCCAAGATCTATAAAGAACTTATTAACTC  
AACAGCAAAGAAACAAACAATCCAATCATGAAATGGGCAAAGACATGAA  
GAGAAATCTCACAGAGGAGGACATAGACATGGCCAACATGCATATGAGAA  
AATGCTCTGCATCACTTGCCATCAGGGAAATACAAATCAAACTACAATG  
AGATACCACCTCACACCAGTGAGAATGGGGAAAATTAACAAGGCAGGAAA  
CAACAAATGTTGGAGAGGATGCGGAGAAAAGGGAACCCCTTTACACTGTT  
GGTGGGACTGTGAACTGGTGCAGCCACTCTGGAAAACCTGTGTGGAGGTTT  
CTCAAACAGTTAAAAATAGACCTGCCCTACGACCCAGCAATTGCACTGTT  
GGGGATTTACCCCAAAGATACAAATGCAGTGAAACGCCGGGACACCTGCA  
CCCCGATGTTTCTAGCAGCAATGGCCACGATAGCCAAACTGTGGAAGGAG  
CCTCGGTGTCCAACGAAAGATGAATGGATAAAGAAGATGTGGTTTATGTA  
TACAATGGAATATTACTCAGCTATTAGAAATGACAAATACCCACCATTG  
CTTCAACGTGGATGGAACCTGGAGGTATTATGCTGAGTGAAGTAAGTCAG  
TCGGAGAAGGACAAACATTATATGTTCTCATTTCATTTGGGGAATATAAAT  
AATAGTGAAAGGGAAAATAAGGGAAGGGAGAAGAAATGTGTGGGAAATAT

CAGAAAGGGAGACAGAACGTAAGACTGCTAACTCTGGGAAACGAACTAG  
GGGTGGTAGAAGGGGAGGAGGGCGGGGGGTGGGAGTGAATGGGTGACGGG  
CACTGGGTGTTATTCTGTATGTTAGTAAATTGAACACCAATAGACATTAC  
TTCTATAAAAAAAAAAAAAACCACCTAGAGTTTGTTAAACTTCATGGTGT  
ATCCTCTAATTTTCATGAGGCTTCTAGGCCAAAGCATACCAAGGAGCTTTAT  
TTAATTCACCTGACCAAAAAAATGCACAACAGGTCTCTACTTGATTCCCTC  
CAATAAATGATGCAATAAAGTTTAGGTTTCCTTAGGGAAAAAAAAAAAAA  
AAGAGATGAATGAGAGACAGACAGTGGTCACAATACAAGTCCAGGATTTT  
ACACTTCCCAGCAGTCAAAGCTGATTTACCCTAATGGCAGAGGCCACTTA  
ACCCAATGTCAATTGCACAAGTTTTTTTTTTTTTTGTTTTTTTGT  
TTTGTTTTTTTAATTGCACAAGTTTTTAGGTAAGTCTGATCTTAGCATT  
AGGGATTAAAGGAGCTCCAGCTTAATATTTGGGGTATTAGCCTCATGTCT  
CATTTGTGGCCTGTCTTGTCCAGAATTTGTGAATTGTCTTTGCTTTTACC  
CTTCTTTTGGTGCTGGGTCTGGAAAAGAAATTTCCGTCTCAGTTTCCACG  
TTTGAATCCTTTCCCTTAGTTTTTGCCCCAGAGCCTATAAAATTGTCAAAA  
GTTGGTTTTCAAAGTGTCAATGCCCTTTCCTGGACCTACCTTCATGTAT  
GAAGTCCTCAACCTGTTTCAGATTTCCCTCTCTGCCTGGATCTTTGAACAA  
TATCTACTCTCAAAAGTACAGCCTCTGTGTTCTGTTTGTATTTTACAATT  
TTAGTATTTTGAAGTCTTTTTACTTGGTTAGTCTAGCTAAAGTTTTATTAA  
CCTGGCTGATCTTTTTAAGGGACTGTTGATTACCTTAATTTTTTTTTGTCT  
ATTTTTGTTTTCATTTATTCCTTTTCTTTATTATTTGTTTTGTTTTGCTC  
ACTTTGGGTTTAGTTTTGCTTTTTCTTTTTTCATTTACTTAAATTGGAAGAT  
TCAGTTATTGATTTGAGGTTATTCATTTTTAATAAAAGCATATACTGTGA  
TCATAAACTTCCTTTTTAAGCACTGCTTTAAATTCATCCTGTAAGTTATAG  
TATTTTGCATTTTTTTCTCATTCATATCAAAGTATTTTCTAATTTCTCTT  
GTGACTTCTCTGATGTCTGATTCCTGGTTAGTTTGTGTTTAAATTTCTAC  
ATATTTGTGAATTTCCCAAATTTTCTTCTATTATTGATTTCTAACCTAAT  
TCAATATAGTTAGAAAATATACTTTGTATGATTTTCAGTTCCTTTTAAATTC  
ATCGAGATTTGACTTATGACTTAACATATGATATATCCCAGAGAATATAT  
CATATATATCATATGCACTTGAAAAGAATGTGTTTAAATGCTATTGAGGGA  
CATGTTCTATTAAAGTCTATTAGGTCTATTTGCTTTATGTTGTTGGTCGGG  
TCTTTCTTTTTTTAATTTATTTATTTGAGAGAATGAGTGTGTGTGAGAGA  
GAGAGAGTGAGAGAGCGAGAGCACGTGCACTAGCAGAGGGAGGGACAGAG  
GGAGAAGTGGACTCCCTGTGGAGCAGGGAGCCTGATGTAGGGCTCTATCC  
CAGGAGCCCCTAATCATGACCTGAGCTGAAGTCAGATGCTTAACCGACTG  
AGCCACCCAGGCGCCCCAGGTCTTCTATAACATTGTTGATCTCCTGCCAA  
ACTGTTTTACTCACTATTTGAACAGATATTGAAGTCTCCAACCTATTATTG  
TTGAAGTGTTTTTTCCCTTCAATTCATCATTTTTTTCATGTCATGCAT  
TTTGAGGCTCTCTTGTTAGGCACACATATATTTATAAATTGTATATATTCC  
TGATAGATTGATCTTTCTTTCATTATACAATGTCCCTCCATATATTGAGA  
AATATTTTTTTCCCTTTAAATTTGTGCCTGATACTTGTATACTAATATATA  
TTAGTATAGCACTTCTGCTTCTTAGCATTGATGGTTGTATGGTATAACCC  
TTTTCCCCTCATTCTTTTTTTTTTCCCTCATTCTTTTACTTATCTCTCTG  
AATCTAAAGTGTATCTTCCATGAACAGCATATAAATTGTGTTTTTTTTCTGT  
ATGATAACCTTGGCTTTGATTGGATTATTTACCATTTACATGTAATGAT  
ATTAAAGATATGATGGATTCACTTCTATTATTTTGCTTTTCTGTCTTCTG  
AATGCCACAAGAATCTTTTTGTTCCTCTTTATTCCCTCTTTACTGCCTTC  
TTTTGCAATAAGTGATATTTTCTACAATAAAATTTTAAATTCCTTTAAT  
AATTTCTTTTTTTCTTTAGTAATTTCTAAATTATGTTAAAGTGTATTTT  
CTTTGTGGCTCCTCTAAGGCTTACATATATTCTCAACTTATCTGAATTTA  
CTTCAAATTTATAAATCATTATATTCAAGTGAGATATAGAACTTTACTCT  
TATAAAGCTGTATTCTCTATAGTCTTCTCTCTTTTTTTCAGTGCTATTATC  
ATGACGTGTAGTATGCTTGTATATGTTACAAAGCCAACACTATACATG  
ATTATAATTATTACTAGATTTATTTCAGAAAAGCCTATTTCCCTCCACAACA  
AGCAACCTCTGGTGCCACTCCTCGAAGTGCAGCTCTGGGCATGTGCATAA  
TCTCCCTGACCAATAGGGATGATTATGGTTTTTACCCAGACTCTCTATGTC  
TCTCCCTTTCCCTGACCTCCCCACTAAGCTTCTGGCTGCTTTGCCTCTAT  
TGATACCACACCCAGCTGTTAGCTTCCACTAATTGCTAGTTGATTGCTAG

TTGATTTCTTTTATTTTCTTTTTTTTTTAAAGATTTTATTTATTTATTCAT  
GACAGACACACAGAGAGAGAAGCAGAGACACAGACAGAGGGAGAAGCA  
GACTCCATGCAGGGAGCCTGATGTGGGATTTCGATCCCGGTCTCCAGGAT  
CACGCCCTGGACTGAAGGCGGTGCCAAACCACTGAGCCACCAGGGCTGCC  
CCTGCTCTGTTGTTTTCAACCACAAGCTTAAATTCTCCATCGACTCAACC  
AGTTAAATTCAAGCATCTTTTCCAGGTTAGTGTATTTGCAGTGTGAGG  
CATGCTCCAGCTTTAGGAGGAATATTCTGAAGTGTCTTTTCCTCTCTGTT  
AAATGTCTCGTGGTCTGTTGTTTCACTTGCTGTTAATGTGAACCTATCAG  
TGTCCCTCTTAATGGCTCACCCTAACATCTTCCTTGTTTGACAGAGTCTT  
CAGGCATGAATTTCCCATAGTCTGTTCCATACAACCTCAGTCCCTTAG  
GTAAAGTTACAGAGCTCTCTGTTTTTGTGGACTGCCTATTCTCCTGAACC  
ACTTTGACAGAACCTTTGCATGCCTGCTCTGGAGTTGGGGGAAAAGGCAA  
TAGCCCACGTGTTCCAGAGTGAACTGTTGGGTTGGCAGGTGTGCGAGGC  
CCCAGTCTTCTTGCCCTTGCTCCTCTGTGTGTGGAATCTCTGCTTCATGAA  
CGCGCTGTAACAGGGGTGATCAGAGTTCAGTATTCTTTGTCCACCAGGTC  
TTTCATCCATTCTGCCCTAGTTCTTTCAACTCTGTCTGCCTAGAATTGTT  
CTTAAACATGGTGTAGCTCTTCAGGCTGCCATGCCGGAAATCCTGCTCC  
TTTCTTGCTCTTCTTGCCCTATAGCAACATAATTTCTTTTGGACCACAA  
ATTTGGCCACAAATTTCTCCTTGCTTATTCCACTTTTCTTTTGCCCTCTGG  
GAACAGTGGAACATGTGATATGAGAACACAATGCTGAAGGCAGTCGCAGC  
ATTGGACATTAGGCTGTTGTTCTGATGGCCTCTTTACCTGATAGGTGGGT  
GAGGTTACTTTTCTCAAGCTTTGGGAAAACCTAAACAGAAAATTTTACT  
ACCACCAAAGGGAATATATGTTTCAGCAGAATCCCTGTGACTAGGTTTATA  
GTGCAGGGTCTTCTTAAAAATAGCCTCATTGCTTTCTCCAGTTTCTGTC  
CATAGAGCACCTATGTTATAACTTGATTTCTTGACTGTGCTCAGAGATTA  
AAGAGAATGTTTCAGGGAAGTGTATATGATCTATTGGAAAGTATTTTAAAG  
CTACTGGTGTAGGATCGTCGCAGATCTGGTTCAGATCTAGCCCTTTGCCC  
TTCTCCTCTCTAAGGGCCAAAGGAATATATAAACTATTATTATTTTAA  
TGCTCTCATCCTCCCCAATAACAAGGTACCCCACAATTGATAGACATTGA  
AATAAGTCTGTGGATTATGAAGATGTTTAAAGAGTTCAAAATCCCTTCTAGA  
GCTACGTAATGGAAGTGGATACAGAGTGATATGAGGGAAAGGAATGTGTT  
AAAAATTATTCTTAGACCCTTAGGATTGTGCTGTAGTATATTAATATCT  
TATCGGGAGTGTGCAAAGGGAGGACATAAAGGACTGAAGCTCCAGGAAT  
TAAAGCTGTGGTGAGGAGAGTGAGCCCATAAGGAAATGAGAAGTGGAG  
ATCAGGATGGAAGAAGGAGAAAAATCAGGAGGTTCTGGGGTAAGATAATCT  
TTTATGTAAGGAGAACAGTGAAGGTATGATTTGCTCTTGAGACTTTATGA  
CAGAGGAAGGCTGAAAAGGATCCTCTGATTCTGTGGCAAGGGTGTGATTG  
GTGACTTTAGGAGGAATCATTTGTGTGAGGATTGGGGTGGAGTTATGTTG  
TGGAGGTTTGTGGGATGAATGGGTGGTGAAGTGGTGGAGATGGACACTT  
GAGGCAGGAGATGACTGCTTCAAACCTCTTTTCCTTTTGAATCCGGGAG  
AGGCAGTTTGGAGAGCAGGAAGGTACCAGAGGAAGGAAGAGATAAGTCTTA  
CTGTGGAGAGGAAGTTTATCATAAGAAGGGATGAGGACATCAACTCTTCT  
ACTATATGGAGTGAGCATGGAGTAAAACAATATTGGAATAGGCAACCATT  
CTGGCCCTGACACTTGTTGCTTGTGTAACCTATGAAAACAAAACATTTA  
GTCTCTTTGTAGCTCCGTTTTCTCATCTGCAAGATGAAAGTAATGAAGGC  
TACGCTGAAAGGTTCCCATGTCAAATAAAATCATGTATTGATACAACAGG  
TACATAATAAGTTTCTAATAAATGTTTCTTTCTTTGCTTCACCTTGCTTG  
CCCTATTTAATTTCAAATGTAGATGAAAATGCTATTAATGTTTTGTTTCA  
TACACAGCCACCTTTACAAGAACACTGGCTATTCCATTAAAATCATCTGA  
TATTTATTGAGCACCTCTATAAACAAGAAGGGCTTAAGCATGTAGGTGA  
CAGATTTGATTGCATTTAAATATGGTTGCTCTGTCTCAATTGTAGAGAA  
AAAAAAAAGCTATATACAAGAGTGTGTAGGAGCATAGGGAATATCTA  
GGCTCCTCATAGGCCAGGTCCTGGGGACCACGATGGCTGTGTGGGAGAC  
TGACTGAACTGATTTGGGAAAATTTCTAGGTGAGAGCATCGACAGACATG  
GAAAGTGACTAGACCGGGAGGGTGAGTGGAGAGAATGAGACAAAGATGAT  
AATCTAAGTTTTGACTTGACACTCAGAGGGATATTAGTGTGAGTCATCG  
AGAATTGTCTGGTGATTGATCAGTTGAATGACTGCTGTCCCTAAAAGCT  
ATGGTAAGCACATCAGTAACATACTCCATATATCTCACTCCATATATGCT

CACTCCATATAGTAGAGGAGTTAATGTCCTCATCCCTTCTTATGATAAAC  
TTCTCTCCACAGTAAGACTTATTTCTCCTTCTCTGCTGCCTTCCTGC  
TCTCACACTGAAGCAGTCAGTCGTCTCCTGCCTCCAAGTGTCCATCTCCA  
CCAAGTCACCACCCATTTCATCCCAGAAACCTCTACAACATAACTCCACCC  
CAATCCTCACACAAATGATTCTACTAAAGTTCAGAGGATTTCTAACAAT  
AGTGTGGAATTAAATGAACTTTTGGCGTGATCTACACAGGAGAGTATGAA  
ATATATGAAAATGTCTATAAATTTTTTAGGCAGTAGTGCTCTAAGGAGTC  
CCAGAACTAATTATTGCCACATTCAGTTTTGCAGAAAATTTTTCGGTGAA  
TACTGCCAATCATGTAAAACTCCATGTGTTTCTACACGTGTCACTTATA  
GAAAAAGTTGCTACAGGAAGTTAGCAGCCTTCCCCATGCTCTTTCCAGAC  
GTGGAAAGCTCAGCTATGGCTACTGTGGGGGAGCGGGAGGAGCGAGGTAA  
GATTCCACTCAGTGCTTTTTCTTCTGTCTGTGTTTTGACTGTCATCCTTT  
CAGCTTGTAGCAAAAGGAATGGGTTTTCTGTGGCTAGATGGGCCTGAGA  
GGTTTGAAAAGTAAATCATTAAAGGGTTTCATGATGAGATTGAAATATAT  
TATTGATATGCTGAACACCACATGGGTATAAAACGAAAGCAAAGTAAACA  
GAGAATGTCTCCCCACTGACCTTAGCGAGGAATTTCCAGATGCTGTCACA  
GCAGGCTCTGTGGATGGAACCTTTGCTGCTTCCCGGAGGTCAAATTTATG  
ACCTTTCTGGACACACACACACACACACACCTGAACACATGTGTGC  
ATATACACACATTCTTCTAAAGTTGATTATTGTAAGCTTCTGGTAGTATC  
TGTTGCTTTCTCCTGCCTTGAGTGGACTTAGGACAATTTAAATGAGTTTCAG  
GGACATATATGATTTGAAGAGCCAGGAGAATTTGCCTTCTACCAGAGGAA  
GCCTAGATTCTACATTTAAATCATAATGGACACCATTGAGGTTCTTTTTT  
ATGGTTCACAGTCTAATAGAGCATCAGAGATACGAGAGAAATCTTAGCTC  
AATACCTCAATATTACAGATAAAAAATAGCAGAAGGTATAAGTACTTTAT  
CATAGTTATGATATCTATAAACTATATCATAATTTATAGTTTATATCATA  
TATCTAAACTATATCATAGTTATGATAAAGTACTTATATGAACATATAA  
GTTTCAGGCAACTGCTCTGTGGCAGAACACAGATTTAAACAAAACAAAACA  
AAAAATCTTTCTTTCTCTTTTCAGCCACATTTTATAATGTGTTATCTCCTT  
TTCAGTTTTTCTCAGTGACTTCCGAGAGACATATGAATAATCCCAAGCA  
GAGAATAATCTGCGAATCAGTTCTTCATTCCCTTTGTTTTCCCTAGAAAA  
GTTTTAGGTGAGTTATACTTCTTTAGATTATTTTGGTTTATGTGTAACC  
TATCGCTGCAGGGGTCCACGTTCCATGAACATGCCATGTGGCAGAAGAAA  
AGCAATCTGAGATTTAAACAATTAATTTCTTTTTTTATGATTTTATTTTT  
AAATAATCCTCATCCCTAATATGAGGCTTGAACTCACAACATGAGATCAA  
GAGTCACATGTTCTATCAACTGAGCCATAAAAAAATGAATTTCTACCTGT  
AGAGTTCAATGGTTTAGTTATCTGAGATTAAACATAGCTGCTTTTCTGTT  
TTATTTGCTGCAATATGCATGCTTTAATGCATGTTCTAATGAGGGTCACT  
ATACCTCAGAACTGTATGTACTTTCCATCGTACAGTTTGCTTTAAGTATA  
TTTATATTCTAAAATGCATTAAAGTGTATTTATTTCTAAAACCTAGTTTAT  
GGCAAAGTTTATAATTTATACACTAAAAATAAAGTAAAAATAAAGTAAATA  
TAAAAAATAAAAAATAATAAAGTAAATATACTCGAGGTAGAAGGGGGAT  
CACGGATTTTAGAGTAAAGTGAAACCTGGTTTCAAATCCCATCTCCTCCA  
GTTCCCCGCTTTGAGAAACACACAGGCCGATCCATGTCCCTGTTTTTTCA  
GTGGCATTGTGTGTGAACGTGGATCCCATAGCATAAGTTGCAAAGATAGT  
ATAAAATAACTCTTAAAGGCCTCATGCACCGTAGACAGTTTCGTAAGAG  
GCATGACAAAGCGAGCCAAGCAGTCCATTCCATTTTGCTTGGTTTAATGT  
TCTATCACAAATCTGTGAGCTACATTTGGACTATATCATCCTGTTAGGAA  
AAATTAATAATAAAATAATTAATTTTTCTTCTGAAAGGAAAAATTCTAT  
CCAATGCAAAGTAAATGAAAGGATAGCATGATTGTATCCTTTTGGCAT  
TCATGAAATTATTAGACTATTTCCAGCATTCTTCCACTCTTGAGAGAATG  
TGTATGCAAAGGGAACCTCCAAAGGAGCAATAGGGTCCCCATTCAACTCC  
ACTGAACATGACAGTGGCTGTAAGCAGGTTTATTTCTCTTTGCTGGTGCT  
GTCACAGCACACCCTGACCAGCAAAGGACCACGGCTGCTGCTCAGAGTGG  
GACACGTGTATTACCTGTTGGTGAGGGTCTGGCTCTCAGCTGTAATTGCT  
GGACAGCCTCTCCAGTGATCTCATCCAGTCTCTCATTTTACAGACATG  
GACATGAAAGTATACAAATTCCACTTGAAAACCTCAGTGAATAGATTTGGC  
ATCTAACAAACAGATGACCTAAGTAGAGTGTTCTGAGGTGAAGCAGGTTA  
TGCAAGTTATCAAAAAATGTGAAATGACAGTGCTTTTCAGTTTTTAAAAAT

TGCTGTGTTTTAGTTTTAGTTTCTCTAGACATTTACTTTTATTTTCCTTGA  
CTTTAATTTTCTTTTACCCTATGGATGATTGATAGACAATTAATTCCAAA  
ACAATACTTTTAAATTGCTATATGAAGGCATACTTTTTTTTCTTGAAGTT  
CCTTACTGAGCAACTGCTGTAGACAAATGCCTCCCTGTTTCTTTATTCTT  
TTTTTTTCCCCAAGAGATGAGTGATTGTTTCTTCCACAGATTAAACTGA  
ATCTCAAGGTTAGAGCATGCATTTTAGCTCTTAGTTCCACTGATTTAGTT  
CTTTTTTCCCTAACATGATTGCTTGAATACTATTTGCTTTTGTGTGTGTG  
TGACTTTTCTTCAATTATTGATTCATGTGGTTTAGGTTCTTGGTTTGGGT  
CCTTTTGTGCAACAGCTTTTTAGAGTAGTCCAAGTGGGAACATAAAGAGG  
CTATTTTAGAGGTATTTTAATCTTTGCCCAAAGCATCTGGAACCTTCTGA  
GTGAATACATTCCCACAAGTATCATAATCTGTCTGTAACAATTTTAATGA  
AAAAAATTGTAAATACCAGCCGTGTGATACTTGACGCTTAAAGCTAGAT  
TCTCTAAGAGGGGAAATAAAAAGGTGTTTCTACACTAGCTTCATTGAAGCT  
GCATTATCATTAGGGGCGAACTGACTTCTATCATGTGCAGGGGAAAGGGG  
CCAGATGTGAGTTCTGTATATCACAGACATACAAGGCATATGGTGGAAGG  
TGCTGGAGTTGGTTCATGTTTTCTTCACAGAATATGATATAACCAAAGGA  
TTCATACCTCTATTGAGTTTGTGAACCAAATTCAATTCATGTTTTAGGAA  
TTTTACAGGGTTAAATTTTAGAGATAGAAATACTTGGGTTTTTGAGAAAA  
GAACAGGGTTAAATTTTTGAGACAGAAATATTTGGGGTTATTTTCTCTTT  
AATAGTTCCAAGGTCATGCTGAATAATGTAGATGAACCTGAAAATGATT  
ATTTTTATGTGAATTTTCCCAAATATTAGTTGGTAAGATTGAGATGAGTA  
AAATATCTAAATAACTTGAGTTACTCTTTCACTTATTTATGTGTTTACTT  
ATTATTTTTTTTTTGGGGGGGGGAGATTAGGAATCATATAGTCATGTCCA  
GCCTATGTTGGCAGAAATTTGTTTATACCTAAGGTAAATAATAAAAACCT  
TGAGTCGGTTAATGGACACTGTATTTCCCTTCCTTTTTTCTTTTTCTCTT  
ATTTAAATTGTAAACAACGTATCTTATGAGGAACTGGAGAAGCAGTGAGT  
AGTCCAAAGCAAATAATTACCTTTTCTCTTTGTTTACGAGGTTTCAGAGAG  
AACTTCTTTTTCTTTTTCATTAaaaaaaacccaaaaacaaaaaactccctc  
TTCTTTCTCCAGAAAAATTTAATGGTAAGAAATAATCCCAGCCCCACTAA  
CATCGTTAATAAGAATGGAAAGCGCTGGGCATCAGCCTCACTGCCCGATG  
CCTTCTTTCCCTTCCTGAGTGAGGAATGTTAACTGCATTGTGCTGTAATG  
AGCCATGCCCAAACCTACTGTTTTCTGGTCCACTGTTTATTTGATTTCTTT  
ATTGTAATGAAACTCAGATGGTTGGTGTTTACACTAGCAGTGCTGCTGGGC  
GATCACGCTGGGAACCGTTCTAATTAGCTGCAAGTGGGTCTCAGAATTAG  
AATGGAGGAAAGAACAATTTTTAGTAACGACTTTAAATTGAAGCCCTCA  
TTTATTTTCATTATGGCCAGACCAGAAGCAAGCTAATGTTTCCCAGGTCT  
TTCCATGCAGGGCCTGTGGCTGAGCTCAGTGGAGTAGAATTCAACTATTT  
CAGATGCACTCAGCCTCCATTGCTCAAGGAAGGGGAATTTTAAGATAATA  
TTAGAATGGGCACCCACTAGAATTGTCAGGGCAGAAGACAAAGTGCACAG  
GAGCAGTGTGGTACTTTTTTCACTTTGAACACAGAGAAAGTTATGTTTT  
TTGAATTCTGTGATCTAAAAACACCTTTTCTTCCCTGAGTGTATTTTCAG  
AAATGAAATCTTTTGGTGTCCATAAAGAGTGACCAGTGAATTACATTTTA  
CCATTCAGCACATAACAGAGACCACAGGCTAACAAGAAAATGGCTTGCTC  
TAATGAGCCAGTGTTTATATATCTTCAGGATTTGTGGTATTCATTCTTTG  
GAAGCAACTAATTGGTCAATCATATGAGATTGGAACATATCCAGTCATACT  
TCATGTAGAGGGTATCTCTAACACATTTTCTGTAGCACAGAACATCTTTT  
TAATGAAGACAGCATGTAGCCAGATGTCTTCTAAGACTCCTTTTGAAATG  
TAATCTAGTATGTGAATTTGTAAAACATGATTTATAAAAATTATGCACCT  
TGCAGGGATAGTCAGAAGTTCTCTGTAGAAGCACTTATGTATATATC  
TTTGTCATATTTATTTTATTATCAACCAACATTAGGGATGTCTTTAAAAAA  
GTTTTTTTCAAGATTTTATTTATTTTGGGTGCCTGGATGGCTCAGTCGGT  
TAAGCGTCTGTCTTTGACTCAGGTGATGATCTCAGGGTCTGGGATCGAG  
TCCCTCTTCAGGCTCCCTGCTCAGCAGGGAGTTCATCTCTCCCTCTCGCT  
CTACCCCTGCTCTCTCTCTCTCGGTCACTATGTCTCTGAAATCAGTGAAT  
GAATGAATGAATCAATCTTTAAAAAAGATTTTATTTATTTGAGAAAGAA  
AGAAAGCACAGTCCGGGGGAGGGGCAGAGGGAGAAAGGAGCAGACTCCCC  
GCTGAGCAGGGAGCCTGACATGGGGCTTCATGCCAGGATTCTGGGATCAT  
GACCTCAGCTGAAGGCAGACACTCAACCAACTGAGCCACCCAGGTGCCCC

CATTGGTGATGTCTTTAATGAAAGTTTGTAGAAAAAGCAGAGTTTAAACCA  
TTTGATGATTGCTATATAGAACTCAGATGTGTTTTGCAGAAATAATACA  
CTTTTTATAAACTTGTACTGGAAGACTTTTGTCTCTGTCTTTAAATGT  
GGCAGTGTTAATAATCTGACTTTTCTCCTGATTGGGAACAAATCCTACAT  
TTGATAAAGTACTTGTACCTAGAAGAAACATTATATGTTCTCATTCAATTT  
GGGGAATATAAATAATAGTGAAAGGGAATAGAAGGGAATGGAGAAGAAAT  
GGGTGGGAAATATCAGAAGGGGAGACAGAACATGAAGACTCCTAACTCTG  
GGAAACGAAGTAGGGGTGGTAGAAGGGGAGGAGGGCATGGGGTGGGGGTG  
ACTGGGTGACGGGCACTGAGAGGGGCACTTGACGGGATGAGCACTGGGTG  
TTATTCTGTATGTTGGCAAATTTGAACACCAATAAAAAATAAATTTATTAT  
TAAAAAAGAAAAAAGAAATCTTAACAGCACTTCATACTCACTGGGA  
TTGCTGTAATCAAAAGACAAATAATAACAAGTGTGGGTGAGGATGTAGAG  
AAACGAGCTCTCATTCTCTGCTGGTGAGATTATAAAATGGTGCAGCCACT  
TTGGAAAATAGTCCAACAGTTAAGTAAGAATTACCACACGAACCAGAAAT  
TCCACCCATAGGTATACACCCAAGAGAAATGGCAACACGTGTCCACATAA  
AACTTATACATGAATATTTTTTAACAGCATTATTCATTATAGTCAAAAG  
ACAGAAACAGCAAAATGTCCATCAGCTGATGAATGAGTAAATAAAATGT  
GGTATTTCCATATAATAATAGTCAAAAGATGGAAACAGAAGAAATGGTCC  
ATCAGCTGATGAATGAGTAAACAAAATGTAATATTTCCATACAATGGAAT  
ATTATATAGCTTTAAAAGGAATGAAGCACTGATACACAATACAACTAGAT  
GAATTTTGAAAATATTATACTAAGTGAAAGAAGCCACTTACAATCCAGGT  
TTTATGGTTCCATTTATATGAAATGTGCAGAAAAGGCAATCTATAAAGTC  
AGAAAGTAGATTAGTAGTTGCTTACGGCTGGTAAAGGGGATGATGGAATT  
TGGGGGTGATAGCTAAAGGATGTGGATTGTTGAATATATTCTAAAATGTA  
TTAGTTGGACATATCTGTTAATATACTAAAAAATTGACGTATTTTAAATG  
CCATACAATTTTAATTGTATGGTGTGAATTACAGCTAAAGAAAGCTCTA  
ACAAAAATATAAATTGATGCTTACATGCTTTGACTTTACATATATATATA  
TATATATATATATATATATTTTTTTTTTTTTTTGTAAAAGAGAATGGAC  
CTATGGAAAAATTCTTTTGCAGCAACCAGGCATGCAGGACTCTGCAGTTC  
TAGGAAGTACATGTATTTCTTTTCCCACTTTTACTGATCTTGTCCCTA  
TCTGGAAAGTTTTTCCACTGTATAAAGCCTTCTCATTCTCTGTGGTCTAC  
CAGCAATGCTCTTTTCTTCTGTGAAGCCTTCCTTGATGAATCTGTCTGAA  
GACTTTTTCCTTGGTATTCTGACAGAAGCTGATGGGTAACTATCATCTCCT  
GAATGTTGATCAGAAGCATCTCTTAGATATTACTTAATTTAAATCATT  
ATAGATGAGAGCACAGACATATATAGAAGAAGAGTGCCTTACTCAAAGTC  
ACACCACTATTTTAAATATCATCAAGGTTTCTCTATAGAGTCTTGACACC  
AAGAATGAAGTGCCTCCAACCTCAAAAAATGAACAGGGAAAAAATTAT  
GTTTTTTCCTTAATTTTGTCAACATAAAATCATCTTCTTGCTCTGATACA  
CCTGACATTTCTTGCTTGATTGTGGAACCTACAGGAGGTGATATTGGAGGA  
AAGAAGTCTCTCTGGGAGGCAGAAGGTGATGCTGGAAAAGCAGGCCAAT  
TTAGAGCTTTATGGTAGGTTTGAATTTAGCTCTGAAGATTTCTTATACC  
CTTCCATCCTATTTCTAGTAAAGATATGTGTGTTATAGGGATAACCAAAT  
TTTTTTTTAAGATTTTATTTATTTATTCATGATAGACACAGAGAGAGAGA  
GAGGCAGAGACACAGGCAAAGGGAGAAGCAGGCTTCATGCAGGGAGCCCG  
ATGTGGGACTCGATCCCAGGTCTCCAGGATAAGGCCCTGGGCTGAAGGCA  
GCGCTAAACCGCTGAGCCACTTGGGGATCCCGGGAAAACCAAATTTAAAT  
GGTGATTGTTTTCTGTATGAGATAATACCCATGATCTTTATAACTTCTCC  
CTTGCATAATGTTTCAAGAGACATGATGTATGCATGATGTAAAAGAGGTAAT  
AGATGGAAAAAAGAGAAATAGCACAGGCTTTATGGGAATTCATTTTTAATC  
CAGTTAACCATGTAGATTTTGAGAGAACAATTTGGATCTGAAGGGGTCTA  
GTTCTTGGACCTATGGTAACAAACTTGTTCTTTTCTGTGTCTCCAGAAGA  
AATGATGGGTGTAAAGTAAGTAATACCTCTCTGCCTCATGGTCCTTCTAT  
GAGAGTGCATTAGAACTATAGAAGCTAAATTTCTGGAAGTTGCAATATA  
GAGTTTATAAGAATTATAATCTACATTTTCTCAACTTAGTTTTAAAAATTG  
TCTTTCTGTTTTTATGGCATCCTTACTGTTGTACTAAGAGTCACAGGCAG  
TTAAAAAAGGCACTGGGTGTTGTTCTGTATGTTGGCAAATTTGAACAC  
CAATAAAAAATAAATTTATTATTTTAAAAAATGGCACATGAGATGGTCTC  
TGTCTTTGAAAGCACTCCACTCTTTTTTCTTCTCCTGCCTGCTCTAATG

TGGATCAGCAGGCAAGGGAAGTTGCTTCTCTTGGCACGGAGTGTCTCTGTC  
CTCCAAATTCTCTTTCTGCAAAATGAAGGCAGAGATATAAATCAGGTCAGT  
CCTCTTATTCCAATCTATTTTCCATCAGAAAACCTGAGTAAATCTAATT  
TTTAAATCTTATTTAGGCAAGTCATCATTGCACCTATTTTCTCCATCAGA  
TAAACACAGAGGGAAGTCTTAGATTTGCAAACCTCCAATATATTATGCGT  
GACACAGGAAGATCCTTAGGGTAGAAATTCAAAGTGATATTTAGGGGCAG  
AAATATAACTTGAGAGAGGAAGACCCTGGAGAAGCCACCATGGCCATCCT  
TGA CT TGT TGT TGT G CAGGACCTAATATTATTGACATAACTGCATTTTAAG  
CACTGATTCTGGAATTAGACTGT TAAAGCTGAGCTATACTAATCAGCTGA  
ATTCCAGAGGGGATACAGAACAGGTGTGCTTGGCATT TTTGCTCTGTGAAT  
GTTTTTATCCTGTCTTCGATTGGTAATGATAAATCATATGTTCCTAATTC  
TGTTCTTCTGTGTCTTATTTTTAACTTCATCCCACATCAAGGAAAACAAG  
ACTGAGGGATGACTGCTGGCTTCCTTGTCTCCTCTGCAGATTCCTGAAAT  
TACGTCTTCTAAATACTGTAGGTTTTTAATTCTCCTTGGATTATTTAATC  
ACGAGTGTCTTGGTCCTGTTTGTGGATTTCATACGAAGCATCTCATAAAGG  
TGAAGGAAGGATAAGGACCCAGAGGCCCTTAGAATGGAGGCTATGTTACC  
ATCTTGGCTTGAAGTATGGAAACATCCCTGTGATTACTGTAGCCCTGAAG  
TTAAAAGGGAATTTTCGGAAGTTTAAACCATAGGACTATCTCCAGGGG  
CTCAGATATTTTATTATTATTATTCCTTCATTATTACTTTAGAAGGAATG  
AAATCAATTTGGAATTTGATTTCGATTCATACAGTAAGAAAAGTATTAGTA  
GGAGAAAAGAATTTTCAAAAATGAAGAAAGAAACATGCATTGATTTGGGAG  
GAATGAATTTTATTTTCATGCAAAGGTTAAATCACAAAGGAAAACTAAGA  
AGATATCCAAAACCAAAAACATTTCTGTAAATTGCTTTTAAAAGTGGGAC  
CAGGAGAAAAGGAATATTTTAGTTGTGACTATATTAGGAATGATAGCAATG  
ATAACTGTGGCCCAAAAACATGGAACAGATGACAAGGGGCAAAACCTCAGA  
AAGGAAGCAAATGACTTCCTCAGAGAAAATCATATCTAGATATTATGGG  
AAGTCCCTCTTAAAGCTAAAACCAGGGGCACCTGGTGGCTCAGTAGTTGA  
GCGTCTGCCTTTGGCTCAGGTCTGATCCTGGGGTCCCGGGATTGAGTCC  
CACATTGGGCTCCTTGTAAGGTGCCTGCTTCTCCCTCTGCCTATGTCTCT  
GTCTCTCTCTCCATGTTTCTCATGAATAAATAAATACAATCTTAAAAAAA  
AAAAGAAAGCTAAAACCACGGGTTTAAATGAAAGAAGCAAATTGAGAACCA  
GAGCTACTTAGAGCAAATTTGGACAATTTGAGAGGGCATCGGTGGGAGGA  
TCAGAATCCAGTCTCTGCTAGCACGATTAGGTTGAGCCTGAAGATGACAAG  
ATTATTTAAATGGGGCAGCAGGTTCAGTCTGTACCACTGGGAAACATGCT  
CTTGGGACTTTTGATTTATGAGTCTGAGCCAGCAGTCTCAAGTTGGCTCT  
CTTTGTCCCTACAATTAGGCCCAGAAACATATTATGTTCTGCTAATACAGT  
TTTTAAAAATATTTCATTTTCAAATGAGTAATTAAAAAAAACCTGAATAA  
ATCCCCGGACCCAGCACCTCACAGTGCAGCAGTCAGCTGGAGCTGAGCAA  
TGGAAGTCATCCTTGGTGAGAATTCTTACCTCTTTCTCTTGTTAATGTC  
TCCATTTGCCCAGCTTCTCTCCTTTATGTACCCACTTGGCCTCTGCAGG  
CATTTGGGCCTGTGACATCTGT TAAAAAAGAAAAAGTTATACTTAAATG  
AGACAAGCTAAAGGGAGCTGGCTGACACATAAGAGCATAGTCCAGACCTG  
GGTGAGATAATGGAGTGAGGGAGGGTGT CATGGGGGTAAAGTTAGCCTCC  
CTCAGCCTTGTA AAATTAGGCCACCTTTGGGTAAATAAGAGATGATCTTG  
GTAGACCCAGGAAGCATTAGTTTCATAGCTCTTATTGGTAGATTTTTTTT  
TATAATTTTTTATTTATTTATGATAGTCATCAGAGAGAGAGACAGGCAG  
AGACATAGGCAGAGGGAGAAGCAGGCTCCATGCACCGGGAGCCTGATGTG  
GGATTGATCCTGGGTCTCCAGGATCATGCCCTGGGCCAAAGGCAGGCGC  
CAAACCGCTGCGCCACCCAGGGATCCCTCTTATTGGTAGATTATCATAAG  
AATCCATCCATCCATCCATCCATCCATCCATCCAGAGCTGTGGGTAGATTA  
TCACAATCCAGAATCCAGAGATGTGTTGTTGAACAAAGAAATTTAAAGAA  
AAAAGAAAAAAGAAATTT CAGGGATCATGGGT CAGGTGCTCAAATCACTG  
TAGATAAATGGTTGAATCATGCCAGCTGTGTGGCTATAGGGACTTGCCTG  
ACCTGTGGCAAAGGAGACTATCTATACCTTCTATAAACTGTTCAAATGA  
AAAACAGATAAACTCTGGGGCTTGTCAAGACAAAACCTATCAAAAACATG  
CTTG CAGGACACTAGAATTTCTGGTTTATAGAGCTTGAAGGAAATTTATG  
GGGATGGCATTGCCAGAAGAAGATAGAACCATAAGAGAAACGGTTTTAGT  
ATGAAGGACCCCACTGAATACTGTAAGTGGTATTTTTGTTATTTTTTA

TTGTTATGTAATAGAATTTTAAAAATTCAATTAAGGTATTTTAATAGTTG  
TAACAAAGGGCCTTAAGTGAAGTGGAGGACTGTTTATTTCTTTAGGAAAG  
TAAGTATAATGTGGAAAGTGAGGACATGGGAATATGATGTATTTCAGAGAG  
TAAATGTTTTGTATGTTTTCCAACTCATATGTTGATTTCCCTAGCCTCTA  
TTATTGGTATTATTAGGAGATGAGGGATTATTAGGAGATGGGGATTTTGG  
GAGAGGCGATCAGTCATGAGTGTGCAGCCCTCATAAAAGAGATTAGTGCC  
CTTATAAAAGAGATGCCAGAGAGCTCCTTTTTTCCCTTCCACCATGTGAGG  
ACATAGTGAGAAGACAGCCATCTGTGACCCAGGAAGTGGGTTCTCATCAC  
CAGATCTGCTGACACCTTGAGCTTACTGGCCTCCAGAATTGTGACAAGTG  
AATACTGTTTTAAGCCACCCAGTCTAGGGGTATTTTTTACTACAGCAGCCT  
GAATGAAGTAAAGGCAAAATAAACTTGCATAAGAATAAACACAAGTATAAA  
GATAGAAGAGAACAGAGGTGATGGAGAAGAGTTAGAGATCAGAAGGAAGC  
CCACCAAGAATTGTGACCTGCGAAAACCTTCCAAAGCTCAGGATATCCAAG  
AGACATAAGAACAAGGAACAGCAATGAGAACAACAAAAGGGAAACGGACT  
CATAGCTATAGAGAACAACTGGTGGTGGCCAGAGAGGAGGGATAAGGAG  
ATGAGGGAAAGGGATTAAGAGGTCCTGACTTCCAGTACAAAATAAGCAAG  
TCATGGGGATGAAAAGTACAGCATAGAGAATTTAGTCAATAATATTATAG  
TAATTTTTTTATGGTGATAGATGGTGGACTACACTTATCATAGTGAGCATT  
TCTTAATGTATACAATTGTAGAAACACTATGTTGTACACCTGAACTAAT  
AAAAATACAGTCTGTCAACTATACTTCAGTTTTAAAAAAAATAGGGATAAT  
CAATATTTACTACTATTTTTTAATTATATGTGTGGTAACCTCCCTCACATA  
TAGAAACGTCATGAAAATCTACTTACTGTAGAAATGCCATTTTTTTGTTT  
TGTTTGTTTTTGTTTGTTTTGTTTTGTTTTGTTGGCGAGGTGCAGGTGA  
GGCAACAGATAAAATTCACGCTCTGGAGCAGAGGAAAAGAAAATGCCCATA  
GGAGATGAGATACAAGCAAAATGAACTGAGATCAAAAGTCCAGCAAGAAA  
AAGAATTTGAAGCTAGATGTGACCATGAGAACATGAGACTGGTATTTTGC  
AGGGATCTTGAGAAAGTTTTAGGCATATCCCGCAGGATGTGGAATAGGGA  
CTCAAGCCAATTTCATTTTAAATCTCAAAGGATCAAATGACCTTAGGCGAC  
ATCGCATTACAATGTTAGTTTGCCCAATGCAGAATACCTGATGCTCATTG  
AGTTTTCTTTCCTTTTAAATAAGCTTCCTGCTGATCCAGTAATAAGCTGGC  
CAATGCAATGCTAAGACCACCTTGGAACACCACCTCCCGGTGTGAATGTG  
GGAAGAGGCACTTGAAGGGGTGCTGATTCTGGGCTGAGGGTTTTCCACT  
TGGAATCCTGGTTCCAAGTTATAGTCCCATTAGAAGGATCCCCAAGGAGT  
AGACAAATGTGCTCTAGTATCCAGTCACCTGTTGGCAGACTCCAAATAAA  
AGTGAAACAAGGAGCCTTCAGAATAACCGAGTTTATGGTAGTTGGCTGGA  
ATAGAGTTTGAAAAATAAATATCGCCTTCTTCCTTGGAATGTGCAATTC  
CTGTGTGCCAGTTGATGAGACTGAAGAAATCCTTGATGTGAAACATTCC  
TATGCTGAAATCTCGGTGGTAAATCAAGAGGATGTGTTTGTGGAGACTAA  
AATCTGCAGTTATTTGCAGGGACTAATGGGACCAGGATAGATAAGTTTAG  
TAGAAAACCTTGATTAAAACACTAAAGGCTTTTCTTCTGTGGATTTAAACA  
TATTCAACTAATTTATTGAGGATATTACTTTATAAAACCTTTAAAAATTA  
TATAGTTCGTTTGACTTAGCAACAATGAGTCTCTCAAGAGAAAAGGGGGA  
TGAAATGAAATCAAACCTTGGCTGAGGCTGAGAAGTCTTCCTTTAGTACTT  
TAGACTTACCTATGTCCTTTTTTTTTTTCTTAATAGTATAGAGTGGCATA  
AATCTTATCTCCTTATGGTAGTTCTTGCATATGCTGTTTGGTAGTAGTAA  
AATTAATGTATAGTAAAAAGATAAGGTTTCTGAATATTGAATGAGCCAA  
ACTCGATGTACCTTTAAAATTTGGCTCAGGGTAGGGCCAGGAAGATTTTA  
AAATTCAGCAGTAGTTGCTATTTCAGAAGGTTGTTCTAGTACCATTGCCAG  
TAAAAACTCAAAGTGAAAGGTCTAATGTATCACACATTGGATTTGAAAAA  
CTATGTTTCAGGGTAACAAGGCAATTCTGGCTCTCTCTCTCTCTGTCTCTC  
TGTCTGTCTCTCTCACACACACACACATACTTCAGAAGTGTCCCAA  
TTGCTGTCTGACTGTGCTGATGTCCTGAGCAAACAGGGTGAGCACAGGCAG  
GAACGTCCTTTACATCCCCATTTTTGCCTTTGCAAACACACATAAAAAAAT  
AATTAATGATTAATTCATGCATGAGTTATTTGACACTTTTCTTTCTCG  
TAAGTGAAGTGTAACCCATTTGGGAAGGTATAGTTCAAGCTAGGAAAGGC  
AAAAAGGAAAGGAAAGAGGGCTTGAAAGTTGGATTGAGAAAGTACTGTGT  
TGAGGCTAATACCTGGTGATAGAACTGAAAATATTGGCTGCCAATGAGAT  
GAAATAGGACTTGGCGGGGGGGCGGTCATAATAGCAGGAGCCTCAGGTC

TACTGTGCCAGGTTTCATCTGATTGTTACTTTGGTGGTTTCTTCCATATTG  
ACTTTAAAGGATTGTCCCATTTGATGGCCACCCCGAGGGCTAAAAGAGACA  
TTAATAATAGCTACCATAACCTGAGTTCCTATTGCATGCCAGGCTCATGC  
TAAGCACTTAAAAAGAATTCTGTAAGTGAATTCTTACCATTTTATGGAG  
CAGATATTCTTATCCCGATTTTATACATAGATGAATACTGAGCTAGAGGA  
AATAATTTTTTTCTTCTATTTTGTATAATTGAAAGACAATGAATTTAG  
AATAATTAAGACTCGTATTTAGATCTTTCACCTGACCTGGGTTGTGGGAG  
AAACCGTACATTGTAAATTTACGTAGGGAGAATCTTTGTTGAATGTAAAC  
TTAGACACGAGTGTTTCTATGTGAAAAGGAAGACAGTTTTTCCAAAGAAC  
AAATTGGGGTCAGTATGTTTTATGTGGTATATGCAAGGGTCAGAGCAGGT  
ACTCTTTGCTTTCTATTTTCTTCTTTCTAGGGTCAGACTTAGTTTTCTCA  
GCTTAGTGTAAAGGAGAAGAAGCATCAGACTGGAAAGAGCCTGGAGTTTTT  
ACTGAAACATGGGATTGAAGCCTTACTCTGATACTTAGTTACTGTAGAGA  
GTTCTAAGTGTTTCAACCATCACAACTCACAGGTAAACTTGGGTATTTA  
ATTTAGATTAAAGATAATGTATACAAAATGCTTGTTAGATAGTAAGCATT  
CTATACATGGAAGTTATTTTAGGTTTGTTTTACCTCAGTAGTTAGGGAAG  
TTTTCCAAAGACCCATCATTGACCAGTATGGTGGAATCAGAATGCCTTTC  
CTTTAACCATTCAATTATGGATCAATACTCTATAAATTTATCTATGAGCTT  
CTTGACTCTACCTCTGTTCTTCTTAGGCAGCCTCTGTGCTTGGGGTAAT  
CAGTTCCTTGATTTTTTACCTAATCTAGTAGGTGTGCTTCCTCTTACCTC  
GCCAGAACTAGACTACAAATCCTAGAATCTCAGGATTTGATGCCAAATCT  
GTATGAGTTAATCTAGTTTTCTAATTCTGTCTTTCAACTGTCATCTGTA  
CTGATCCTTAACATTTAGTCTGTTCTTGAAAATACTTCTCAGGATGTCTT  
TTCTTTTCTGCCAGGAGGTCTTTCTTTATGAGATCAAGGACAACATGGG  
GTTTGATCACCAACAACCATGCCAACTCCTGCTTCTCCATGTTTCCATCA  
CTTGAAAGTTTTTTTACTGGGTTTATTAAACTATCTGGTTACTATTTGAC  
TTGATTTAAATTTTAGATGGTCCTGTGGTAACCAAACAGCTTTCCAAATT  
TCTGCTTAAACATACTGGGACAATTTTATTGGAAAATAGCCTTTAAATAT  
TTAGTTATGATCTAGGTTCTTGAGTCTTTTCAGATGTATCCATATAAAA  
ATAGAGTTCTAGTACACAGACTTTTATGAGATATAATGTGAAAATGGGCA  
TTAAGTACTTGATGCCAACTCAGCATATTCTAACACCTCCCTTTATTTGT  
CGTAGTCAAAAGTTGATCTGTTTACATGGTAAGTGCCAATACTTTAAAA  
TGTTAACTCTTAAATGGAAATAAATCTAAAGTGCATCATGCTCTTACATA  
TTTTTAAATAGTTTTTTTTCTTGATTATAAACTAATGGATATATATTGT  
AAACAATTTAGAGTAAAAAGAGGCATAAAAAAAGCAAGTCATTTACCACC  
CATCTCATGGATCTTATACTTTGCTGTTTAAACATTCCATACATTTCTCTA  
TGCATTCAGATATTTTAAAAAGAGGGTCTTAAATATACATTTTGTTTTTA  
AATCTATTTTTATTGGCTTTTCAATGTATAATCACATACAATAAAATTTA  
GCAATTTTTTAAATGTATAGGTCATTGAGTTTTGTCAAATGCACACTCTTA  
TAACCACTGCTACAATCATGATATAGGATATTTTTCATCATCCTCAAATA  
TTTCTCATATCCATTTGTAATTAATCCTTCCCAACAACCCTGGCTCCATG  
CAACAACCTGACCTGTTTTCTCCTCCTCCTCCTCCTCCTTTTCTTCTCCCC  
CTCTACCCTCCTCCTTATTTTACTTGCATATAATTGATACACAATGTTAC  
ATTAGTTTCAAGTATACAACATAGTGTTCACAACTCAGTACATTATGC  
TCTGCTCACCAAAAGTAGGGCTACCATCTGTCACCATGCAACATTATTAC  
AGTTCCCATTTGACTGTGTTCCCTATGTTTTAACTTTTATTCTTGTGACTT  
ACTCATTTCTGTAAGTGAAGCCTGCATCTCCCACTCTCCTTACCTATTT  
TATTCCCCACCATCTCCACTCTGGCAGCCATCAGTTTGTTCTCTGTATT  
TATAGGTCTATTTCTGCTTTTCTTTGTTTCAATTTGTATGGTCTTTTAGATT  
CCACATATAAGTGAAATCACCTGATATTTATCTTTCTCTGACTTATTTCA  
CTTAGCATAAATACCCTCTGGGTTTACATCCATGTTGTACATATGGCAAG  
ATCTCACACTTTATTTTATGGCTGAGTTATATCCCATTATATATATATAT  
AATGGGATATATATAATGGGATATATGTGTGTGTATATATATATATATAT  
ATATATACACACACACACACACACACGATATATGTCCCATATATATATGTA  
TATGTATACATATACCACATCTTCTTTATTTATTTATATATCAATAGACA  
CTTCGTCTGATTCCATATCTTGGCTGTTGTTAATAATGCTCCAACAAACA  
TAAGGACACATATATATTTTCAAATTAGTATTTTGGGGACTTTTTTGGGT  
AAATACTCAGTGGTAGAATTATTGGATCATAGGATAGCTCTATTTCTAAT

TTTTTGAGGAACCTCCATACTGTTTTCCACAGTGGCTGTACCAATTTGCA  
TTCCCACCAACAGTGCCTGAGGATTCCTTTCTCTCCACATCCTTGCCAAC  
ACTTGTATATTTTTATCTTTTGATTCTAGCCATTCTTACAGGTGTAAG  
GTGATATCTCATTGTGGTTTTGATTTGCATTTCCCTGAAGATTAGTGATG  
TTGAGAATCTTTTCATGTGTCTGTTAGCCATCTGTATGTTTCTTTGGGAA  
ACTGTCTATTTCAGGTCTCTGCCATTTTTTAACTGGATTGTTTAGGATT  
TTTTGGTATTGAGTTGTATACGTTTTTTTTAAAAAATATTTTGGATATTAA  
CCCCTTATTAGCTATATCATATGCAAACATCTTCTCCCAATCAGTAGGTT  
ACCTTTTTTTTTTTTTTTTCATCAGTGGTTTTCTTTGCTGTGTGGAAGCAT  
TTTATTTTTCATGTAGTCCCAGCAGCTTATTTTTGCAGCTGATCTATTTTC  
TTAATTTCTTTTTTGGATTGTTTCATTGTTGGCATATAGAAGCATTGATG  
TTTATGTGTTGATTTTGTATCCTGTAACTTTCTGAAATTCATTACTAGC  
TTTGATATTTTCTCTTTTCTAGTGTATCTTTGGGATTTTCTTTATATAGG  
ATCATGTTCATCTATGAATAGAGATAGTTTCACTTCTTCTTTCCAATTTAG  
ATACTACCCCCCCCCCGCCACCCTTGCCTAATTGCTCTGACTAGAAGTT  
CCAGTACACTGTTGAAAAGCAATAGTGAAAGCAGGCATCCTTGTCTTGTT  
CCTGGTATTATGGGGGGAAACTTTCAGGTAACTTTCACCACCAAGTATGA  
TGTTACCTATAGTTTTTTCATAAATATCATTTATTGTGTCAAGGAATTTTC  
ATTCTATTCCTAGGTTTCTAAGTGTTTTGTTATGAAATGGTGTGATT  
TGTCAGATGCTTTTTCTCCATCACTTGAGATGATCATATGGTTTGTTC  
TTCTTTCCACTAATGTGATGTGGTATATTGATTTTCTCATGTTGGACTAC  
CCTTACATTCCCTGAGATAAAACCCCACTTAATGATGGTGTATAATCCTTTC  
AGTATGATTTTATGTTTAGATTACTAATATTTTGTATTGGTAATACTATT  
TATTGATAGTCATAGGATATTGGTCTTTAGTTTTCTGGTGGTTTCTTTGT  
CTGGCTTTGGTATCAATGTAATGCTGGCCTTCTAGAATGAGTTAAGAGCT  
TTCCCATCCTCTTACTCAGTGGGGGGTGGTTAGGGAAGAAGGGGAAGAGG  
AAGAGGAAAGGAGAATATCTTAAGCAGGCTCCACATCCAGCTCAGAGTCT  
CATGTGGAGCTAGATCTCAGAACCTGAGGTGATGACCGGAGCCAAAATC  
AAGAATTGGATGCTTAACAGACTGAGCCACCCAGCCATCCCTGTAATGAG  
GTTTTTAATTATTGATCCAATCTCTTTACTTACTATATGTCTGTCCATTT  
TTTTTAAATTTCTTCTTGAGTCATTGTGGTAATAAGTGTGTTTCTCGAAA  
ATTTTCTCTTTCACCTAAGTTATCTAATTTGTTGGCACACAATTATCCAT  
AGTATTCATTGTAACCCTTTTTATTTCTGTAATGTTGGTCGTAATGTCT  
CCACTTTTCTTTTTTTATATAAATTTTATTTATTTATTCATGAAAGACAC  
AGAGAAAGGCAGAGACACAGGCAGAGGGAGAAACAGGCTCCATGCTGGGA  
GCCTGATGTGGGACCTGATTCCGGGTCTCCAGGATCACGACCTGAGCTGG  
AGGCAGATGCTTAACCGCTGAGCCACCCAGGCTTCCCTCCACTTTTATTT  
CTGAGTTTAGTTACTTGTGTCTTCTCTCTTTTTTCTTACTTAATTTGTTG  
ATCTTTTCAAAGAACAGACTTTTGGTTTTGTGATTCTTTTTATTGTTTCT  
TTTTATTGTTTTTATTGCTTCTGCTTGTTTATTTATTTGATTAATCTCT  
GCTCTACTCTTTATTATTTCTTCCCTTCTGCTACCTTTTGGGTGCTCCT  
CTTACTCTTGCCCTGAGGAATAAAGCTGTGATCAGTTGACAGAAGAAG  
AGAAAAACCAAGACTGATTTATGTATAGTTCTGCATGATATGCAGGAAC  
ACCTTAAAGTGCAGAGCTGCAGTACTTTCTGGGACGTCCCTGGTGAAGGG  
AAATCCTTCCATTGGGCAGAACTTTGAGTAGTGATCCTGGTTATTCACTT  
TGCTTGGAAGGAGAAATGGCCAGACGTGGAATTACAATCTGATTCATGGG  
TTGTGGCCAATGGTTTTGGCTGGATGCTCAGGGGCTTGGAAGAAACATGAG  
TGGAAAACTGGCAGCAGTGAAATTTGGGGAACAGGTATGTGGATAAATCT  
CTCTGAATGAGCAAAAAATATGAAGATATCTGTGTTCCATGTGAATACTC  
ACCAAAGGTTAACCTCATCAGAGAAGAGTTCTAATAATTAAATGTAGAGG  
ATTTCTTCTGTGGATACCAGTCAGCCGCTTTCTTTAGGCACCCCTGTCAT  
TGCCTAATGGACTTATGAACAAAGGGGCCATGATGACAAGGATGGAAGTT  
ATGCATAAGCTCAACAACATGGACTTCCACTCATCAAAGCCAGCCTAGCT  
CTAGCCACCACCACCACCCCGCCAGTGCCAGTCTGCTAATAGCAGAGA  
ACAATGCTAAGCCTTCGATATGGCAGCATCCCTGAGAATGATTATAAGCT  
ACCTGGTGACAGGTTGATTATGTTGGACTGTTTCCATCATGGAAGAGGCA  
GCAATTTGTTCTTACTGGAATAGACACTCTGAATATGCATTTGCTTTCCT  
TGCAAGCAGTACTTCTATCAAACCTACCATTGGTGGACTTACAGAATGTTT

TATCTATCATCATTGTATTTCTTACAGCTTTTCTTGGATCCAGGAATTTA  
CTTAACAGCAAAAGAAGTGTGGCAGTTAACTTGTGCTCATGGAATTTTTT  
TGTCTTACCATGTTTCTGCTATCCTGAAGCAGCTGGCTTTGTAAGATAG  
TGGAATGTTACAGTGCAAAGTGGGTAGCAGTGCCTTGCAGGGTTGGGACA  
AGGTTCTCTAGAAAGTTGTATGGGTTCTTAGTCAGCATCCAGTATGGTGA  
TGTTTCTTTGCTAGCCAGAATTCATGGGTCCAGGAATCAAGAGTTGGAGG  
TGGGAGTGGCATCCATACTTTTAACCCTAGTTACCCACTAGGATAATTT  
TTGCTTCTGTTCTCATGACATTATGCTCTGTTGGCCTTGAGGTCTTAGT  
TCCAAAGAGAGAAATGCTTCAACCAGGAGATACAACAATGATTCAATTGG  
ACTGGAAGGTGAGACTGCTGCTCAGCTACTTTGGGCCTCTCATGCCACCA  
AATAAACAAATGAAAATGTAATTGACGGTTGGGATGATTGATCCTGACTA  
CCAAGGAGAAATTGGACTACTACTCCATAATGGAGGCAAGGAAAACATG  
TTTAGAACACAGGATAATCCTTAGGGTGTCTCTAGTATCATCACACCCTA  
TAAGTAAGGTCAATGGAAAAATGCAACAGTCCAATCCATTCAGGAATTGA  
AGATTTAGGTCACCCCACCATGTAAAGAATCATGAAACAAATGAACAAAC  
AAAAAAGCTAAGGTTTACTGAAGGCAAAGGGAATATGGAATGGCTAGCT  
GGAAAAAGTTGCTACAAATACAGCTATTACCATGTGACCAGTTACAGAAAT  
GAGAACTGTATTTGTCTGAGTATTCCATATTGTTTCAATTTTGTATATGTT  
TGCAAATGTATATAACAAGTATATTTTTCTTCCCTCTCTTCTTCCCTTAT  
TCTATAACATAAAATATATTTACTTTATATCTCAGTATTTAAATATTATT  
TAATATGCATCATAGTATTTAAGTTGCAGAATTAAGAGCTGAGCAAGACG  
GAATTCTTTCTCAGGTTGTTTCTGATTTGAGACATCAGTCTTCTCCTGCG  
CTCAGACTTGGACTTGGACTGGAACCTATAATATTGGCTTTTCTGTTTCT  
TAGTTTGTAGGCTAAAGCTAGACCATGGACTCTCTTGGGTCTCTAGCTT  
GCTAAGTACAAATCTTGGACTTCTCAGCCTCCATCACTGTGAAAGTCAGT  
TCCTTATAGTGAGTCTTAATAGGTAGAGAGAAAAACAATATATAGACA  
TTTATACATACATCTAGCTCTAGAAGTGGTATAGATCTAGATTCATGTA  
TCTCAAAATGGTTCTGTTTTCTAGAGAAGCCAGACTAACACACTCCACA  
GCATGGATAAACTTGAAAGCATTATGCTAAGAGCAAGAAAATATTTACA  
AAAGGCCACATATTATATGATTCTATTTATATGAAATGTCCAGAATAGGC  
AAATGTCCAGAAATGTCCAGAATAGGAAGTAGATTAGTTGTTGCCTAGGA  
CTTGGGTAGTTGGGGGTGAATGGGTAGTGATTTCGTAATGAATATGATGTT  
TCTTTTGTAGTGATGAAAATGTCTGAAATTGTAGTGATTATTGCACAAT  
TGTTGCATATAGTAAATACCATGGAATTGTATACTTCAAATTTGTGTATT  
GTATGGTATGTGAATTATATCTCAATGATTGTTTTATAAAAAAAATCACT  
TGGCTCTTTCTTATGGATGTATACCTTGATTGTCTATTTATATCATCAC  
TTTGCATTTCTGTCTTCAGGCCAATACCACATTGTCTTGATTACTGTAAC  
TCTATAGTAAATATAATCAGGGAATGCAAATTATCCATTACTTTTCTTCT  
TTTGCAAAGTCTTTGGCTATTCTACATTCTTTGCATTTCTTGTAAATT  
TTAGAGTAGGCTTATCAAATCCATAAAAGGAGCTACTGGAATTTTGATT  
GGGATTGCATTGAGTCTTCACATCTTGGAGTAATTCTTATTTGTTTAGA  
TGCTCTTTTCAATTTCTCTCCTCAATTATATTTTGTAGCTGTATGCCTAAG  
TGATCATTTTTTTTATTGCTTTTGTAAGTCTTTTGTACCTTTGTTCA  
TGAGTTATATTTCACTGGATAGAGAATTCTGAGTTGGCTTTTTAAAAAATT  
TTCAGTATTTTAAAGATATTTTCCCGTTATGGCCAAGAAGTATGTGGTAG  
GTAATTCTTGTCTATGTTCTCTGCATGAATATGTTTTTACCCTAGATTGT  
TTTAAGATTTTTCTCTCTTATCATTTGGTTTTTAGCAGTTGGATTATGAAGT  
ACCATTTGTATGGTCACTTGGGTTCAATTGAGTTTTTGGATTGTGTGTTTA  
GAGTTTTTCATCAAATGTGTAAAAAATTTGGTCATTATTACTTCAAATATG  
TATTTTTTTTCTCTCTCTTTTGGCCACCCTTTCACTTGCCTGGGTTCTA  
ATTCCAGATGTGTGATACCATTTCTTTCTTTGTTTTTCCCTCTGATTTTG  
ATTGTTTTTTTGAAGATGACTTCTAATTCATTTTTTCAATTTTTTAATGTTT  
AGTGTGCTATTAATCCTCAATGTATTTTTTAAAGCTAAGTCTTTAGC  
TTTTCAAGAATAATTTTAGATATACAGAAAATTTGTGAAGATAGTATATA  
GAAAATTCCCATAGACCTCAAGCCCGATTTCCCCTGTTACTAACATTTTA  
TGTTTTATATGGCACATTTGTCAATAATGAACCAATACTAATACATTCTTA  
TTAACTAAGGTCCATACTTTACTAGAGTTTCTTCACTTCTTAACCTATGT  
CTTTTTTTCTGTTACAGAATACTATCTGAGATACCATATTACATTATTTG

TCATGTACCCTTAGGCTCCTCTTGGCTGTGATAGTTTCTCAGATTTTGCT  
TGTTTTTGTATGATCTTGATGGTTTTTAAGGAGTACTAGTCAGGTATTTTGT  
ATGATTCCCCTCTACTGGAGTTTTTCTGATGTTGTTCTCATGATTACATT  
GGGATTATGGGTTTTGGGGAGGAAGCCACAGAGAATAAGTGTGTTTTT  
TATCACATCATATCAAGAATACATTCTATAACATGCTTTATCACTGTTCC  
TGTTGAACCTTGACCACTTTACTGAGATAAGTATTTGTCAGGTTTCTTCA  
CTATAAAATCGGTCTTTTTTATTCCCTTTCCATACTGTACTGCCACTATG  
TACAGCCACAGGTAAGCACTGGGGAGTAAGCTCCCTCTTCTTGAGGTAG  
ATTATATAAATTACTTGAATTTTTTGTGCATGCAGAAGATTTGTCCGTC  
CCCCCCCCCCCCCACTTCATTTATGTATTTATTCAACAGTTTGTTTATAT  
CAGTTTGGGCTCATGGATATTCATTTATTATAATTAATACTGCTTAATTA  
ATTTTGTGCTCAAATTATTCTGCTTTAGCCATTGGGAGTTCCTTCATT  
TGGCTCCTATGTCTCTTTTACGGATTCCCTATGAATGTTGCTGTTTTTCTT  
TCTGCTTCCTTACTTTCTGGCACTACAGGATGCTCAGGCTCATCTTGCAT  
AACTCTTGCTCCACTCATAGAATCAGCCATTTCTGCAAGGAGCCCTAGTT  
CCCTTTTATTGAAGAATGCTATTAGAACCATGGTTGAAAACATTTTTAAT  
TTAGATGTATTTTTTCATGTCTAACGGTACCCTCTGGGTTCTTTTTTATATT  
TCACATTTTTTTAAAACCCATGATCATGTTTTTTTCTACATTCTTGAACAA  
ATAGAATGTCTGGTGTTTATTTATTTTTAAAGATTCTATTTATTTATTCA  
TGAGAAATACAGAGAGAGAGGCAGAGACACGTGCAGAGGGAGCAGCAGGC  
TCCCTGCAGGGAGCCCTATGCGGGACTTGATCCCAGACCCCTGGGATCAC  
AACCTGAGCCAAAGGCAGACACTCAACCACTGAGCCAACCAGGCATCCCT  
GGTGTTTTATATCATGTGTTATGGGGTGTCTACTCTGGCTTAGGGAAATA  
TGCACTATTCCCTACCATGCGTGAACCTCTGGGAGTTGTGTCCCTTCCATC  
CCAATATTTCTTCTCCTTGTTTTTGGAAGTTCTCTCTTATATAGACACAG  
ATTAGTAGTCACTCAAAATCTCAAGGGACCCCTCTGCAGAACTCCATTGC  
TCTTTTTTGTGTACTTCTCTTTTTCTTTCTTGGCCACCATGACTTCTGT  
TCTCTGTTCTCTCCATCAGTGAGATCATGGGCTTCCTTTGGGTTCCCTCCT  
ATTTATGTAGTTTGAAACTGCCTTCAAGAAGTACATTGAGATATTTTGA  
ATGCACTGTGCTTATTTCCAGCCTCTCAGGGATTACAGTATTATGATGCC  
ACTTGTCAGTATTTGAAAGCCTCATTTACATATTTTGTCTAGTTTTCT  
TTTTGCTTTTTTGTGAAAGACTAAATCCAGCCCTCATTACTCTATATTCAC  
TGGGAGAGAAAGTCAATAAACTATTTTAAATATAAATACAAATTATGAGC  
ACTTCCATGTCAATAATATCTTGTGAAATATGATTTTAATTATTGCA  
TATATTTCCATCATACACCTGGTTCAACTGTTTTCTCATCTGGTCCTTAG  
CCTTTGAACTTTGGTTATGGTGTTTTTTCATAAGCAAAAATTCATATAGTA  
GACAAATATAACAGTCTTATTTAATGGTTTTTCAAGATTTTTTGCATTTGTGA  
TTAGAAAGGCAAGGTAAATATTTGCCTGTTTCTTTTATTCTGGTTAGTTT  
GTAATTTTATTTTTTACATTAAATTCATTAATCCACCTGGGATTTATTTT  
TATATATGATGTGAGGTAATGATCTATATTTATTTTCTCCAAAGTAATAA  
AAACATGAAAATATAGAAAGAAGCATTAGGTAGATAAAAGCCACACCTAA  
TTCTATTTCTTTCTCTTCCCTTCTGGGACTCTAGTAACATGTACTTTA  
GATAATTTTCTTATGTCCCATGTCTTTTTTTTTAAAGTTTTATTTATTT  
GCTTTAGGGACAGAGAATGTGGGGTGGTGGTATAGAGGAAGAGGGAGAGA  
GAAACTCAACATACTTTGCTGAATGTGGAGCCCAACGTGGGGCTCAATCT  
CATGACCTCATGATCTGAGCTAAAACCTTAAGAGTCAGAACTCAACCAAC  
AGAACCTCCCAGGTGCCTCCCTATGTCTTGTGTGTGTGTGTGTATATATA  
TATATATTTACAAAATACTTATATATACATATATATAAATCTTTTTTATA  
TGTATTTGTGATTTTCTTTTTCTCTTCTTTGATCTAGTCTTTTTTCTGTT  
ATTTTCCATTTTACTAATTTTATGAAAGATTTTATTTATTTATTTTAAA  
GAGAGATACAGAACACAAGCAGGTGAGGGGTGAGGAATGCAGAAGGAGAG  
AGAGAATCTCAAGCAGACTCTGTGCTGAGGGCAGAGCCTGGCTGGATCCC  
ATACCCTGAGATCATGACCTGAGCCGAAATCAAGAGTAGGATGCTTACTG  
ACTGAGCCACCCAGGAGCCCGACCATTTTACTAATCTTTAATTCTGCTCT  
ATCTCATCAACTCTTGAACCCATCTATTGAATTGTATATTTATTGTTGCC  
TTTCCCCCTTCTACAATATAGGAAAATTTGGTTTATTTTTTCATGTATTTT  
AGTTCTCCAGTGAATTCTTCATCTGTTTTTTTTTTTTTGAACATTACTATT  
CATAGTTATTGTACAACAGAAATCCTGACAACTGAGAAATCTGGATCACC

AAAATGCCTATGGTATTTTATATATATATGAGGGTGATATATATTTTTTCC  
TCTTAATATATGGTCATTTGGTCTTTTTCATTGTCAATTCTTGGTGATTGGG  
ATTAAATGCTGGGCATTTTCTATTAAAAGTATAGAGGCTCTAGATTAATC  
TCCCCAAGGTGGATTTGATTTTCTAATAGCAGAAAGATTGTTCTAGGAAG  
ATCACCTTTATCCAATTAGATACTGAAACTATTCAAGGCTTTGTTTCAGG  
TTTTGTGAAAACGTGTTTCCTGTTGCCTTCACTTATAGGGCATAGCCCTGT  
AGGGTTTGAATGAACATTTACAGTGTTCCTAGCATCCCTCCTCCCTTGGC  
CTCTCCTGAGCTTTTTATTCTGGTCTCCTAAATCCTACATGATCTGGCTC  
CACTTACCTTGCTACCATGTCTTACACTATTCTCCCTCTCTACTTCTTTT  
GCTCTAATCTTACCATTCTTTCATTGCTGTTGCATAAGCATGCACACTTA  
AGTCTGCCTTAGATTTGTTGTAAAAGCTCTCTGTTCTGCCAGCATGCTT  
TTCATCAAGCCTGCCTGCTTCCCCTCACTCAGGTCCCTAGGTAAATGTC  
ACATCTGCAGAGCACTCCCAACCCTCAGCATTTTTCTATCTCATCAACCTT  
TTTACTTTATTTAGGACATTTAAAATCATGTGATTTTTTTTTCTGTTTGT  
TATTTTTTATACTTCACTGAAGTAGAAGATAAACTCCACAAAAACAGGGAC  
CTTATCTTTATTGTTTGTCTGCCCTTATTCCCAGCATCTAGAAGTGTCTCT  
CCAGTATAGTAGCTATTTGCCACATATGGCTATTGAGCACTTGAAATATG  
GCTAGTCAAAATTTGAAGTACCCCCCAAAAAAATTGAAGTATAAGAAGA  
ATAAAATACATACCAGGTTTTGGAGACTTAATATACACAAAAATAATGTA  
AAATATATTAATTGTTTTTATATTGATTATATCAAAATTATAAAATTTGG  
GATATATAGGTTAAATAAAATGTATCATTGAAATTAATTTACCTATTTT  
TTTTTCCACTATTTTTAGTGAGGTGAATACAAATTTTAGAATGTATATGT  
GGCACACATTTGTGATGTGCATTCATTTCTATTCTTCAAAATTGACCTAT  
GATAATCACTGCCGGGAAAGAGCTGTCTTTTTATTTAGGCTTTTTTTTCT  
TATTTTCTTTCTTTCTTTCTTTCTTTTCTTTCTTTCTTTCTTTCTTTCT  
TTCTTTCTTTCTTTCTTTCTTTCTTTCTTTCTTTCTTTCTTTCTTTCT  
TATCTTTCTTTCAAGATTTATTTATTTGAGAGAGAGAGATAGGGAAGGGG  
GGGGCGTAAAGGGAGTCAGGAGAGAGAGAGAATCTCAAGCAGACTCCCTG  
TTGAGCACAAAGCCCAGTGCAGGGCTCAGTATCATGACCCTGAAATCATG  
ATCTGAGTAGAAATCAAGAATTGGTTGCTTAACTGACTGAGCCACCCGGG  
GGGCTCTTCCCTATTTTCTTAATATCACAAACAGAAAAAATATGATAAT  
TTCTTGTTAGTCCAAGTTTCCAAAATGTTACTTAAATGATGACTATTGA  
GGATACAAATTTGTTTTTACTTCTTTTATTTATTTATTAAGATTTATGT  
ATTTATTTTTTAGAATGAAACAGAGAGAAAGAGCATGAGCAGGGGGAGGAT  
CAGAGGGAGAAGGAGAATCTCAAGCAGAATCCGTGCTAAACTTGGAGCCC  
AGCATGGAACTCGATCCCATGATCCTGAGCTCATGACCTGAGCTGAAATC  
AAAAGTTGGATACTTAACCAACTTAGCCACCCAGGCATCCTCATTTTTTAC  
TTTGAAAGACAGACTTCAGGGTTTTTATTTGGTGATTTGTTTAAATTTT  
TTTTCAATAACTGGTTAGTTCTCTGTATTTTTTCTATTTTGGAGTACTA  
ACCCTCACTTTTTTTCAATACAAAGTTCTGTTGAAATTATCCCCTTTCTA  
AATGATATAGTTAACTTCCTATGTGTTAAATAAAACACAAATATTTAAAA  
ACAAAAGTGTTTGGGCCTTTGTATCTTAATAAGATCAACTAGGCATTAAG  
AGAAGATAAAATTTTACAGAAGTGCTTGAAACTTTATGATACCTATTTTG  
GATGGCCAGAGGTCATTTGATCTTTTATTTTGCTGAAACTTTTGGCTTCA  
TTCTTTTGGACAGCCTACTAGTAGGCTAAGACCCCTAAAAATATTTTTGT  
ACAGGAAGGTATAACTTTTTTTTAAAGAGCAAGAAGAGTGAAAAAATGGAG  
GATAGATTCTTAAATAAGATACAATGAAACAATTCTTTTTTTCCCCTCAC  
TAGGCTATTCCATTTAGGATATGAACCTGTTCTAGGATTTTCTTTAGCCG  
AACATTTCTTGATTGGGTTTGATAAACTGTTATGAAATCACTGATTAAAC  
CAAGCAACTTTTGATTGCTTGGAACAAGATTCATTGAGCATACATACACTG  
AAATACTTACACTTGCAAACATCTATATGAATGGACAAATATATACATGA  
AAATGAAGGTATGCTTTTTAGAAGGCAGCTTAAACACCTAACAGTTTGGGG  
AAAGGCAGTGGAACATATGAGCTGTGATTTTATTTTTTTTAAAGATTTTTC  
AGGAAATGGAATAAATGGCAAATCACACCCATCAAGTTCAGTAACCTCA  
AAACACTTATTCTCAGTCTACAAGAGACTAAAACAAGACCTTTTATTCTT  
GGAATGACATTTAGTTGCTCTGGTCTTATAAGAACAGCTAAACTTTTCCT  
TCTTATTTTCTCTCTAATGAGAGAGTGGTATCTGGGTTTAGATTAATTTG  
ATTTTGAATGGCTATTTGGTCATATGCTGCAGGGCAGTAACATGACTTTT

CTTCCTGTGGAAAGGATGAAATAACCACAAATCATAAAAATTCATTTGCTG  
GTTTCATAGATAATTATTACAATGGCTACTAAATATTTCAAAGCTATAAAT  
ATTTTCCAAAGTATTATTTATGGGAACCTTCATGTAAGTAAAAAATATTTT  
CTGAACAAGAAAATATCTTCCCACATATTTTAAGATCCTAGTTTGTTCAC  
AGAATGAAATTAGGCAGACCCCCCCCCAAAAGGACAACAATATATATTTT  
AAAACATTGTAGAATTCTAATTTTTTAAAAGAGGCCTAAATTTTGAGAAA  
GGCAGGAGTTGGGCCAGTTCTGATTTCAACTGGGGAAATACTGCTCAATT  
AGAAAATGTCTCAAAGGAAGGTGTGAAATAATTGGAAGTTTGAAATAACA  
AATCAAGTCAAGGAGACTGTGCAAAAAGTCAGTCTTTAGCAAGACCACAA  
ATTATCAGGGTATCAAAATATCTGTTTCAGGGCTTGAAAACCTCTATTTAAG  
ATGAAAATAACTTGAAGGCCAAATCCTGTAGAGCAAGAAAAAATTTGAAGC  
TTGAAAAC TAATTGCTTTCAATTCATGGGT TAGAAGGCTGGCTGACCAA  
CACATTCATAGGCCAACAGCCCTACTTTCTTTTTTTTTTTTTTTTTTTTT  
TTTTTTTTTTTTTTTTTTTTTTTTTTTTTTTTTTTTATGCAGCCCTACTTTCTAA  
TGAGAAACAAAAC TTTCTCTTCTTGAGATTACTTCTGTAACTATATAGA  
TTAAACATGGACATGCATTGCTATTCTTTTGTTAAATAGATTTTTGTGTT  
TCTGAGCAAAGACACGGGACCTTAAGATCAGCCTGCTTAATTGAAAGATT  
CTAAGATTTTTTTAGAATTTATAGAGATAATTGAAGGGATTTTTTTGGTC  
ATTGTTTTGAATTTATCATAATAATTACTCTCATTCCTTTGGTGTTTGAT  
GTCTTGCCATGCCTGTAGAGGATATTCTTTGCATTCTCTATCTAAAAATA  
TGTAAGCCCTAATTTATAGATTATCCTTCACAACAGTTCTGAAGGGTCAG  
CACAGAGAAGGCTCTCATGAAAGACTTTCTTCTCACTGCTCAGTACACTG  
GCTGTGAGAATGTACTTTGCTGCAAATAACAGCATACCTTACCAAGAGTG  
ACTTTATTCTTCCCATTTAAACAAGAAGGTAGGGCTGATCTAGTGATTCAA  
CAAATCACTAATAACCCACACACAGTCTTTCTTTTGTCTATACTATATTA  
AACACCCTTCATTCTGCTTCTTGGTTGTTAACATCACTCCTGAAGATACA  
GGCAAAGGGAATGAAGGCAAGTTGGTCAGCTCCATTTATTAGTTCATCAT  
GAGCTTTTCCATAAGTCCCCCTCCAATAGCCCCTTATGTTTCCTTGAGCA  
TGCTTGGTCACATGGCTACCCCAGCTGCAAGGGAAGTAGTAAATTAGGAG  
TAATATTAAAGAGCTGGCTTAGGCCAAAATGCCTGGCTTTGGGCACTTGC  
CATCCAGACTCAAATCAGGATGTGTTAGCAAGAAAGGAGACAATGAATAG  
TTGGCAGGAAATGTTCCCGTACATGTCACCTTGAAATAAGTTTTGAGCTGG  
TGTGAAGTATTCCTGAAAATGGTATGTGTTATGTGATGTTAATCCTACTA  
TCTTTCAAGCTACCCTTTGTAATTCATTACAAAATTGATGTTTCAAATA  
TAATGGTAAAATTATATCTTGACTAAATCATCGAAGCATTGAGATGGATA  
CAGAAGAAAAATCTACAAGATTTATAACTTCAGGCCTCTTATTTATATAA  
TTCCTTTAATATGTAGACATTTGGTAAAAAGTATCAGGCTATATGTATGA  
TGGCCTTTCACAAGAGAAATAAATTGAGAAGGACCTGTCTTATTTTCATCT  
TTCATAATCTCCTTGTTGCAAGCAAACCATATTTATGTTTCCATTTTTAT  
AAATAGTGATAAAGAAAGTAATGTTTTTTTTTTTTCTTCTTTGCAAGTTA  
TTGAAAACCAAATAGGACCATACCTGGGGCACATGTACATAGAACCAACC  
TTTCACAAATGTCAC TAAGAAAAC TGATCTTAGCATCTCAGAGGATGCTT  
CTATTCATAATCCCTGCTCTTTCACCACATTTAAATGATGAATTTTTTCC  
GTGTTCTTGGTATTTCATTACACTTTTACTGATAAGTCCCAGATACCAGA  
TCTATAACTCACAAAAAATGTGTTCTATCACACCGTACCATAAAACCATG  
TCTGTCTTGCTTAACAGGCCATAGAGGATAGATAATCCAGAAATTATTGA  
AATAATATGGTCATAATTTACAATGTACCATCTTAGGACTAGATCACGAG  
GCACAAAGATAAATAACATATTACAGTAACATGGAGAAAAGGCATGGATAG  
ATTCATAAACAAGGCAAGGCAGCAGCACTCTGGAGGTAATTATTCATTGT  
GGTCAGTTTGGTAAGAACATGTTTCAGAGAGAGGACAAACCTGAATTGAT  
TTTGAAAGGTAAATAAAAGTGTGTTAGGTGGACATAAGAGTTAAGGTGGA  
AATTTGCAGGTAGAAATATGAACATGAAGATGTTATATTACATAGTAAAA  
TTTGAGAATGTTAAGTTCTCTGCAATGATTGAAACTCAGGCTGCACCAGA  
GTTATTTGTTAGATGAATATGGGTAAAGTTGAATAAAGACAGTGGAGAATA  
ATGGTCATCATATTAATGTATTCTGACTTTATCCTGTAGGGTTTTCTCTA  
GAGTCTTAAAATGATCATATTTGTGTTAAACAAGAATGCTGTGAAAAGCA  
AAGGATAGAACCATGAGCTCCAGGTATTTTCAGTCATCTAAGAATAAGACA  
ATTAGGTTCAAGCTCTGAGCTAACGCAATAACCTGGTGATTGAGAAGAAA

AGTGGTATAAGAAAAAATAGGAAATGAAAATCGACAGTTTTGAGGCTGAT  
GGAATGGGGGATATAGAGGAATCTTTCTCTTTCTGGTTTCTGTGCCTA  
AGTCCTTCTGATATTTTGCTGCCTGAACAATCATCTTATTTCCATGCTGT  
ATTAGGTGTATGGGTGTGTGTAAGGGGATTAGTTAATTAATTAAGGGAAT  
TGGCTCATGTCTCATGTGGTCATGAAGGCTAAGAAGTCTACAAACTGCT  
GTCTGCAAGCTGGAGAACCAGGGAAGCCTGTGGTATAATTCAGTTAAGTC  
CAAAGGGCTGAGAACCAGAAAGCTGCTCATGTTGGTCTCAGAGTCTGGAG  
GCCCAGAAGCCAGTAACCTCTGATATGAGAGCTCAGAAAGAGATCTCTCAC  
CCTTCCTTCACCTTTTTTTCTATTTCAGACTCTCAGTGAATTGGACTATGC  
CCACCCACACTGCTGAGGGTGGATCATCTTCACCCAGTCTATTGAATCAA  
ATGCTAATCTCTTCCAGAAACATCCTCTTAGACACTCCCTGAAATCGTGT  
TTTACTAGCTATCTGGACATTTAGCCCAGCCAAGTTGACTGGTAAAATTA  
ATCATCACACACACTTTTTTAAATTTTTTAGTGAAAAGTTATACTTTTTTTG  
GAATGTCCTCAAATATGTATCCTGACATGTTAAAACTTCAAATGCATATT  
AAGGATGGGCCCATTGTCACTGTTTCCATGACACTTCGCTTCTACCTCTT  
GGAATTCTCTTCTCCTTTCTACATGCCAGAGATATTTCTTGAGTTTTATA  
GTAACATCACATTCTCCAATGTGTTTTAGATATCTCCTGTTCCCCACAAG  
GAGAGTGCTCTTCTACTGTTGAATCCGTCTAAACTGCCAGGAAAAACAAT  
GGTGAACAAAAACTTGCCTTCTTTGTTTATGAGTCTTTTACACCTTTAG  
AAGGATAAATTGCACATAGAAAATACTCGAGGACTCTACTCAGTGAATGA  
ATTAATTTCTGCTAGAATTTGTCAACTTGAAAGTTTAAATTAGACAATTC  
AAAAATGCCTGGGGTAAGATTTAAGTACAATTGGTTTTATAGAATAAGATG  
TATATAATGGAAGTGTATTAACCTAATTATGGAAGTCCAGATAGTCA  
GATATTTAAAAAATAACCTGCAGTGAAAAGGAAGGGTAACATCCTAAGAA  
AATTTATTTGTATTTATTTTACTACCTCAGCTATTTTCTAACACTTGAGA  
TTCCAAATTAGGTACAAGAAAGTGGAGGAAAGAAAAACCAGTTGGCTCGT  
GCTCAAATGTGAAGTTGTCTTAAATGCAGATGGGCAAGGACACAACCTCT  
CCTGGCCTTGTGAGAGGTGATGGAAGCCCTCACCCCTCTTGTAATCAT  
GCAACCTAATATGAATCCCCAAACCCAAAGCAGAAATAATAAAGTTGCCAG  
CCTTAATAGCAATTGTACTGTGGGTTAGTATGAAAAGAAAGTAAATAGAA  
TTTTGTTCACTGTACTCCAAGGTACTCTGTGGAGTGAAAAGGAAACATGA  
GGGGAGAAAGGATTATTCAATAAATGGTATTGGGAGTTGCAGGTAGCCAT  
GGGGGGTGGGGGGTGGGCCATCATCACACCAGGCATCTTACCCCAAAATA  
CCTACAGAGAGGTTAAATCCTAATGTAAATAGATATATATCGGCATATG  
AAAAAAATGGAACATCTTAGCTCAGTCATCTTAGCGTGAAAGTCCTTCC  
AAACATCATATAAATACCATAATATTAATAAAAAAAAAATAGAGGTACCTGA  
GTGGCTCAGTCGGTTAAGTGTCTGACTTTGGCTTGGGTCATGATCCCAGG  
GTCTTGAGATCAAGCCCTGCATTGGCTCTGCTTTTCTTCTTCTTCTCTCTCTCTGTGTCCAA  
TAAATTAAATCTTTAAAAATAAATAAATAAAAACGTCAACAATTTGATTA  
CCTGATTTTTTTTCTTAAATTTTACTAACCCTAAAAAAAAAAAAAATTT  
TACTAACCCTAGCATACAAGGTGGGCCTTTTATTTTTTATTTTCTAAGT  
AGACTCTGTGCACAACATGGGGCTCTGTCTCATAACCTGGAGATCAAGAG  
TCACATGCTATACCAGTTGAGCCAGTCAGGCATCCCTGGTTGCATAAAGT  
TTCAACAAATTCTTATAAAAAATGCTATAAACAAAGTCAAAAGTCAAGTAA  
TAAATTGAGGAAATAGATTTGTAAAGCAGTTCAGAGACAAAGGTTTAATT  
TCTTTAATATTTGTATCTTTTATAAATCAATAAGAAAGAAGATATTTTGA  
TTTTCTTTTATGTCAATTATCTGTTAATATCCCTTTCCCATGTTTTAGGT  
TGTTTTCTTTGTAAAGTAATTATTTGACAGATATACCCGGACATATGAAT  
TTATAATAGCAGAATACTGGAATAATTGAAATATTTATAAACAGGGGAC  
TAGCTAAAAAATTATCAAACATCCATATAATAAAATACTACTGAGTTCAG  
CAGGCCATTTTTTATTGATATAAAATGATATCTATGATACATTAAGTGGGA  
AAAAAAGTCACCATTATGTATGTGTGTGAAGTATTTCTAGTGGGCT  
ACATCTGCATAAAAAGTTCTTATTCATATATGCTTCTAAATCCATGTACC  
TCTGGAAAAAAAATTAGAAAAAATGGTAATCACTGTTTTGGGTAAGGAA  
ACTAGATGCATAGGGACTGTCTGGGAGTTGAGTGAGACTATACCCATAAT  
CAAACACTTTTAGTGATTTTGCAGCTGAACATAGAAATATTCACAGTAAGT  
GAAAAAGGTAAAGCTATAAATAACCGCATATCCATTTTAGGCTAAGTTTT

AACAAC TAATGAGTTT GTTGTA AATTTAC ATTGTA ATTCAGC ATTTCAGA  
AATGAA ATTTGATATCAGA ATGAAATTGG ATTATTTGG ATTTTGTACCAT  
GTAAAA ATGTTACTCATTTGAAAA ATAATACTACAAATACGTGGAAGAGC  
AAGACTGGTGCATTGGTGTTCAC TTAGTCAACATATGTTGAGTGAGTGCC  
TTCCGAAACCAAGTCAAAGCTTGGCTCCATTCTCTCTAAACTATGTGTCT  
TGCAAA CATAATGTATCTAATACTTAATTTAATCCTTTGTGAAATGAAGA  
AAAAAAAAACACTTCAGCCTAACAGTTGTTTGTGGGATTACTAGGCTAA  
CAAGCAAAAATCAGCATTGTACTCAGGAAATATTTGAAACTGAAGCGGTG  
GAAATAAGGTTTGTGGTTGTTAATATTTAAATTATTAAGCAAAGCTTAG  
CTAGGCATTTTTCTATAGTGTT CAGAGAAGTGGTATGTTGAGAGTTAGGA  
TTGTTAAGAATGGATGAGGGGAAACCAGAGGATTTTACCTTGGCAGCTGG  
GACACCTTCAGAATTGAGAGCAAAAGACATTTCCCGCTTGAAACAGAAGC  
TTATTTATTTATTTGTATTTTTTTTACGAAAATTTATAACTTTATTTTA  
CTTTAACC ACTTATTAATAATAATTTTTTAAAATAATTTTGTCCAGAATCA  
GGCAATTGCTCTCTGTGCAACCTTGGGCAATTTACTTCATGTCTCAGGC  
CTCTGTTTCCAGATTTGCAAATTGATGACAGTACTAAGGACCTAGCTTAG  
TGTTGTTCTAAAGACTGAATGATTAATGCATATGAAAAGCTCTTAGTGCT  
ATGCCTGGCACCTGGTGCCAGCTGTATAAGCATTACCTGCTACTATCAAA  
GTAATCAGTAGCAAACCTCTAAAACTAAAAGATTGGGGTTTGTCTTCATG  
GGCAGGACAAAGATACTGGAGGGATAGAGTTCCTGATCACAGGCTCACTC  
AGAGAGTGAGAGGGGGATGCCCATGATAAAATAGGGTG TAGAGGGATAGG  
GGAAGAGAGACAAGAGGCTCCTGGAGCTACCAGGGGTGGATTATAGGCTG  
AGAACCTCCATAGAAGTTTTTAAATTCTACAGAGATAATATGGTGCATTT  
CCTGAATATTACGTCACACATTCAGTAGGGTCTGAGACTATAATCAAATG  
CATCAATAATTATATAAGTAAACATGAATATTCATATTAAGTAAACGAA  
CTAGGGGTGGTAGAAGGGGAGGAGGGCGGGGGTGGGGTGAATGGGTGGC  
GGGCACTGAGGTGGCACTTGACAGGATGAGCACTGGGTGTTATTCTGTA  
TGTTGGCAAATTGAACACCAATAAAAAGTAAATTTATTATTA AAAAAAAG  
TAAATGTGTAAATTGTTAATCACTTTTTATAGGCCATGTTTTACCAACC  
AACAAGTTTGTTACAACTTACAAAATAA CTTCAGTATTTCAAAAATAAA  
ATTAGATTTTGAATGAACTGGATTTTAGAGTTATATGTAAGAGATTGT  
AGAAGGGGCTAAGTTCATAGTAATTTTGT TTTAATTGAATAGCAAAATAT  
TAAGCATAAAGAGCATATTCAGTAGACAGGATGTGGTTGAGTTAGTCACG  
GATGGATTCTAGAGAAAGTGATTCTTGAGACTATTTTGTCTCTAAATAAC  
ATAACTATTTATTATAGTACCTATATGTTGCCCACTAATGAATCATAG  
CATAGCTCTGTGATTAGAAGAAAGCAATATGACTCTCCCAACTGCTTGTT  
AGACGAGATGGCTTATCCAATAATAAGTCCAACCAAGGGATAATTTCAA  
GGTTGAGTCAGATCTTTATGTAATTTGGAATAGAGATTTCAAAGGAACA  
TGGCTTAAATAAAGACCCAATCTTGTTACCGGTTAAAGGACACAGTTTA  
AAAGGGAGAAATCAGTGAAGGAGACCAATCCTTTCATTCAACAAATATTG  
ACTGAGTGTCTATTTCATGCCAGGCACTGATCTGTGTGTGGGATTAAAC  
GTTACACATAGGGACTTTGCCTAAATAAGACTTACAAAGTATAAAGAAGG  
TAATATCAGATACTTTAAGTGCTATGATAATAAAGTGAGTAAGGTGATT  
GGTAGTTACTGCCTACTTAGGTAAGATGGTCAAGGAAGGAAGGCTCTATG  
ATGAAGTGCCATTTGAGCCCAGATTTGATTTATTGAGGGAATCAGTCATG  
TGAGGATCTAGGAAGAATGTTTCAGGCAGAATGTACAGAAAGTTCCAAAG  
ACCTGAGGCAGGAACAAACGCATTGGCCTGTTTGAGAAAGAGGCAGAAAA  
CACCTAGCCAGCTGTGGTATAAAGGCAGGAGAGCAGTGAAAACAAAGTA  
GATTGGTCGTGGATTGGCCTTAGTGACCAGCACAGTGCTTTTAGGTTTCAT  
TCTTCACAATATGGAAGATTTTGGAAAGACCTTCAAAGAGGGGAATGACCT  
GATCTAGTTCGTGTTCTTTTATTTATTTATTTATCTATTTATCTATTTAT  
TTATTTATTTATTTATTTATTTATTTAGAGATTTATTTATTTTAGAGACA  
GAGAGTGCAGAGGGAGAGGCAGAAGGAGAGAGAAACCTAAGCAGACTCTG  
GGCTGAGCACAGAGCTGTATGTGGGCTGGATCTCATAACTCTGAGATCA  
CCACCTGAGCCGAATCAAGAGTCAGGCGCTTAACTGACTGAGCCACCCAA  
GCCTCCCTGATTCATGTTCTTAAATACAGGTTGGCTTTTTGTGGAGAAG  
AGACTGTTAATAGGAGTGAGAGTGGGAGTTAGGTTGGAGGATTTTGTGGT  
GGGGAAATTTGAGGAATTTAAGGAAACATGGCCCATTCATAGATTTGATG

TGAGGTAAGACAAGAGTGGAGGTTAAAGTGCAGATCGTTGACTTAATCAA  
GTTGAGTGGATAGTACAGTCCTAAAGCACTATTGATACATGACTGATTGA  
TGGAATGATTGAGAAAAGTGCAGATTTGGAGGCAAATATCGTAATTTAG  
GGTCAGGTTAATGTAAGAAGCTTACAAAATACATATGGCACATCTAGGTA  
TTGATATTAATTACACAAAGGACATACAGCTCAGTCCTGGGAATATGAAT  
ATGGAAGTCATAGCCTATAGGTGATATTTAAGATACAGGATAGTATAAAG  
TCACATAGTGTGAGAGAAGGTACACAGAATATAAAAAAACTGAGACAAAA  
TTTGGGTTGAGTAGTTAAGAGGAGTAAGTAAAAGAAAGGAAATGAGTAAA  
GGAAAATGCTGAGGACAGAGAAAAGAAAACCAGGTGTTGGGGAAGTCAAAA  
GAGAGACCATCCAAGTGTACCAAGTCATTTTGAGAGGTAGAGTAACATGA  
AGACAGAGAGTTGGCCACTGGATCTGGCAGCATGAAACTGTTTCTTGACC  
ACAGTAAGAGTGGAATGATAATGATATAAGGTTGGTTCCAGTTGATTGAG  
AAAAAGAACGAAAGTCAAGGTGTGGAGGTAACACAAAATACCCAGCAACT  
GAGTGAGTTTTCTTCTGAAAAGTGAGCAGAGAAAATAGAGCTGTGGCTTGAT  
AAGTGCACATGAAATGGTGATATCCTATAAGTCCACTGTGAAAATGCCTT  
GAAAATTACACAGTAATTAGGGGGCAAAGCGTATTTTTTTTTCTTAATAT  
GTTTGCTTGTAAGATGTATTTGTAGGCATGTGCTCATTTCATATGTATGGA  
TACTTCAGTTCATATTTCTTGAAAGAATAAGAAAGTGCATCTGCAACTC  
ACTCTGATGGCATGATTTTGAAGGGATTTGTCTGAAAGTCTCTATGCCCC  
TTACGGATTGCTACACTAGATCTGGAATGTCAGGTTCCCCCTGCATGCCTC  
AGCCACTTTTCAGGACGTTACAAACCAAAGGCCAACACATCTTTTCTCTT  
CTCTCTTTGGCCTTTCTCTGTAATTCGAATACAAAAATAACTCT  
GGTTTTTGTTCAGCCAGATAGCTTAACTTGGTACAAAAGTTTTAAGG  
GTATGGGGGTGTGGATTGTGGGAGAAAAACCAGCTCCTGTGCACAGGGGC  
TGAAACTTTTGAAAGGCGGTCACTGAGACCCACAGTAGAGTTTAGAAATA  
TTTTTTTTTATGAATAGATCCCTGTAAAATATGTGACTTCTTGGTATAT  
CTTGCTTATAGTATAGAACAGTATTATTCATAAGATAGCAGGAGGAATTA  
ACCTGAATTATAATTACTATGTTTTGCAGCCATTAGAGTTGGTCACAACT  
CCTGTTATTTGTGTCAATTACAGTAGCAAAGAGAATAAGATTCTAGGGCAG  
TAAATACAGGCATAGTCTTCTCCTCTTTTATCCTTCCATAATGCCTGGAT  
CAAGAAAGAATGGCCCATGAAATGGCCAGTCATCAGAAACAGATGTGTTA  
GCACGGAGGAAGAGGGAATGAGAAGATGAACACATTTTACTGAGGAGCAA  
ATCCTACATTGATGAAAGAAGACAACCTGGTTGTGAGACAATCCCCCTCCTT  
CTTTCCTGGATAGAATAAAGAGAAGGTGGCAATTTAAGACCCTACAATTA  
TATCAGTGATTACTATGAGTTAATGAGCAGCAAGGTCAAGTGACCTTTGT  
GCTCTCTGGGGGCATGTTGACTTGGATTTTGTTCCTAGGACTTTCTGGCTG  
GCTCATCAAACATTTGCCATTTACTACAACAATGATGGTTCGTGTTCAA  
GTTCATAGTGTGCTGTGCTCAAGTTGAACATGCAGGTATTGGATTCCC  
CACCCACAGTTGCCAGTTTACTTCTCATGGTCTTTCACTTTAGTAAGGAT  
AGCAGAAAACGTAACCCCTGGGAACACTGGGTCTCAGAGGCAGGGCTGGTG  
CATAGATTGCGCTGTCTGACTTTTCATGGTTAAATGAGACCTTTGTTGAC  
ACTTGACTTAAAGTGTGATTATCCCCAGTTGAAAATTTGAGAACCAGACCA  
TTTAGCAGTGGATTGGTGCCGCATGTTGCCGAGTACCCTGTGAAAGTCTT  
CACTGTGAAGGGCTAGCACACAACACCTGAAATTTATAATAACTCCAGAA  
GTGAGCTTGGATGCACTCCTTGTTTGTGGGGTTGTCTAACCACTAAATGA  
TTGATGAGGGGCCTTAGTGGATGAGAATGTTGATTCACTGAAATGTGTAA  
AATGTACATTTCTTTTTTTTCAGTATAAACTACCAATGTATGGTCAGTGT  
ATTTAAAAGGCTGGTAATGTGAGTCTTTGTTAGTGTTACCCTGTGTTTTTA  
TTTCCCTTTTGCTTTCTCTGGAACAACCTAACTCTAATGAAACCTGACGTCCT  
AGTGCTAAAATATGTTGACTCTCCCACTCTGCCCTTATTGTGCATTGAAA  
ATATGCATAAACTCTTTGCTAAATCACCAGCCTTAAAGTGTTTAGAGCTT  
CTTAGGTTTTCTCAGAGGTGATCATGGGCCCTAGCCTATTTGTTTTCTTAT  
TGAAATGTGGGGCAACCAGACATGAATGAAGGTGAGCAAACTGGAATCA  
ATAGCCAGTCCTTGCAAGTGATGATGTGATGATCACCTTCAAGGCCT  
TTGGGACCAACTGATTTCCCCAGTTGATGATGGTGAAGGATCCTGACTAA  
GTTCTTCTAGAAAGTTGCCATCACAGAAGATAACTGCCTGGTTATCTCC  
CAAGGGGAGCCCACATCCAATAAAACATCAATAGGACCGTGGTATAAAGG  
GCTGGCCATCTTGCTTACC GCGAAACAACCTCTGAAGGGACTTCCTAGCT

CCAGAGCTCTCTTTGAGACCAGCTAATAACTGTTGCAGTGCCTTTCTGTT  
CAGTTTGTCTATCTGCCCCTTCTGCTTCTTTGAGCCCTTCAAAAGTGCTG  
ATCCCAAGAGCTCTTCAGGAACTGCGTGTAAGTCTCTATCTCAGAATCT  
GGTTCCAAGACAAAGTCCGCTTTAGAGTGTTTAGAAGTTGAGCAAGCTAT  
TTCTGAAGCTGTCAGAAGTGGAGAATCCAATTCTAAATGTGAAAGACAAC  
TTTTCTGCCTTTTTTTCTTTCTTTGTAAATAGCCAAATAGACTTTTATT  
TTATTTTTTTTATTTTATTTTATTTTATTTTATTTTCTTTTCAAATAGACA  
TTTTTTTAAAAATAAATATCTCTTTAAGAGTATGGAATGGGAGTTATAAA  
GAAGCTGAGAGGAAGTCTGTAACGAGGGTTTAGTGAACTTGTTTCAGAT  
CCCAGTTCTGTCAATTTGGCATCAGTCTTTACTTTCTGATCGTTGTTTGTA  
GCAGGATGATAGCCTTCTGGGGATATTTCTCAAACAGTGTTAAAAATTCA  
GATTCATGATCTTTCTCACTAGTTAGGACTTATAGGGGGGGATCTGGTG  
ATTTGTATATAAGAATCATTCCAGGAGATACTTCTATTCAAGCAATTTTG  
GGAAAAGTGTGACCACAAGTTTATCAAATGCTGCTATTAAGAGAAGCTGT  
TTTTATAGAAATAATAATGACACATTATCTGCATGGAGCCACATTTTGTT  
ACCAGCTGCCTTACTCAACAGCTCTAGGTCCAAATAACTACCTCTTCTGC  
TCTTATATTGGTTATCAAGAAAACACAGTAATGAAATAGTAAACAAATT  
GGATGTGCAGTTTTTCAAAGCACCATTTGGTCATGATGGAGATTAATGTG  
CCCTGGTGATAGAGCAAAATAATCCCTTTGAGGCTAGAAAGCTGATGACT  
TAATGCCTTCTCTTCGTGTCCAGGAATCGGGATAGATGATGACAAAGTAG  
CTTTAGCACCTGCCTGGTAGATTGAACCTGGAGCGTGAAGGTAGGCATCT  
GTCAGTAGGCATCGTGAGCTCTTCCTTCTCAGTGATTCTTGAGATCCCCA  
ACTTCTTCCGGATGACTGGTGGTGTTCCTTACTTTGCTTTCTGTATTAC  
AGAGGCACAGATAAATGCTGGGAAATCTACTATCCATGTAGCCATATGTC  
TACAGAAGCTAATTCATGCTGCAGAACATTGTGGTATTTTAAATTTTG  
ACCCATCAGGATAAATTACCTTGATGCTGTTGCAATGATGTTAGGTCAGA  
CATATCTTTATTTTTAATTTCTTTAAACTATAACAAGTTTTTTTTTGATA  
TAACAAGTTACCTGTCAATTACAACCATAAAAAATAAAGTCATTCATGTCAT  
TTTTGTTGGCTCTGCTAGGAAGTTAGCAATTTTAGACTCAAAAATTAGAT  
TTAGTTACTCTGTCTTTCATGAGAGTATTGGGGATATCAGGATTTACCA  
CTTTTAAATAGTGATAACCAAGAAGTCTGCAGAAAATAAGCTTTATTACA  
TCTATGGTAATGAAGCTTGCTGTTCCAAGGCTCTAACAATTCCTTTGGGT  
GTCCCAAAGAGTCGGAGCCAAAGTAGCCAGAAGTGTGTCTTTTTTGACAGT  
CTAAAGACTCCACAGACATTGGTTTCCTATCCTTTGACACTTGTATGGGG  
TTGGCATTTCCTCCATAAATGTACTTGGTTTCCTCAGGATCATTCAAGTG  
GGTTCTTTGACAAATTTATAGTCCTGACTGGATTTGTGATCATAAGATA  
AAATCTTTGACAAATTTCTTTCTTCCCCCTCCTGACTTGAAATTGTGCT  
TTGCTAATTAACCTTTCAATCTGATTACCATGACTTTATTATCAAATTA  
TCTAAAGAAAATTTTACTGAAAAATAGTTCAGTAGTTATGCTGTATGTT  
TTGCCTAAGAAAAAATGTCACTATACATATTATTGCCTAGAACTTCAGA  
TATAGTGGACAATTTCACTGAGTATTTGAATATTTGGGCTACTTCAGAGT  
AGTTTTTCCCTTTTTTGCAAGATGATTTTTTAAAAACCTAGATGAAAATAC  
TTGTATTTCCATAGGTTGTGGCAGTCCATAGATGTACATAAATATAGACA  
TAGTTAAACAGTATATAGACACAAATCAGCATGAGCAATAAGATGCCTGA  
ATCAAAGTTTGCTGTGCATTTCAACCCATATTTATGGTCAGCAGACCTTT  
CACAATGGAAAAAATAGTGAACATCATATGAAATGATGCCTTAAACATT  
TTATAACCTCTAGTTGAGAAGCCAATAATCAAGCAACTTTTACTCATTTT  
TCATAGTACCAAAAGCAAACAGCAATAACAAAAACTAAAAACAAATGTTT  
GGATTATTTTATCCATTTGGATGATATTGAAGGTGCATTGAAAATAGAGA  
TGAGGTGAATAAAGATGAAGTTTCAACGGATAATATAACTAGGATT  
GGTGGTTAATGGGACTCACTGAAACATAAATTTAATGAAGACAAGAAACC  
TCTTGGTTCTAAATGGTGGGAATACAGTAATAAACAAGAGAGTGTAGGTA  
GTCAATATTTTATTCAGTAAATTAATGAATGAAAAATAAGAAATGAAGGAG  
ATAGTTTATCTCAAATTTCTTGATTGGGTGGTGAATGGGTAATCTCTT  
AAACCTGTGAGGTCCAATATGGTAGCTGCACGTGGCTATTTATATTTAAA  
CTAATTTGAAGGGTGTCTGGGTACACAGTTGGTTAAGAACCCAATTCTTG  
ATTTTCGTTTCAGGTCACAATCTCAGGGTCTGAGATCATCTCCTCCACCA  
ACCCCATACTCTCTCTCTCTGTCTTTCTCAAATAAATCTTTAAATTTAAA

CTAATTTGAATTAAAATAAAGTTAATTTATGGTTAGCCAGTCATATATCA  
GGTATTCAACAGACGCATGCTGGTAGTGGCTACCGTAGTGGACAGTATAG  
ATACGGAACATTTCCATCATCACACAAAGTTCTGTTGGTGAGCACTGCTG  
TCAGCAAATTGGCCACTGTATGTGGAAGAGCAGGAATGGGATTGCTGCCT  
TACTAAAGTGTGAGATTTCCAACATATGTTTCCAGACAAGTTGTGCTGACTTT  
GAAGACTTGACATGTTTCAAATCCAAATTCAACTTTCTTTTACATACAAC  
TCCCCCCTAAATCCCTATTTCAATGCTTATCTTTACCATTCTATCAGAAA  
ACCAGGCTCGAAACGTATTTATGTCTCTTTTTCTCCATATAGTCAGATTA  
AAATCCTATAGACTTTTTTTCCCTTAGTATCTTTCTTTTATTCCCTGCTA  
CATAGTGACTTACATAATTTGGAGTAAACTGAAATTTATAATAAGGGAAG  
ATAATTGGTCACAAGAATAAACACTCTGATTCCAGTACGGAAAAATACAT  
ACAAAAAAGGCAACGTTGTACCAACTCCATCCTTGTCTAATTTAATAT  
GTAAATAATATTGTACGGAACCTCCCAGTTAAAATTTTTTTTACAGCTTTG  
TTGAGGAAATAAATTGCATATACTTAATTGTGCATTTTGGTGAGTTTTGA  
CTTACCTGCACACCCGTGAAACCATCACCACAGTCATGATGATGAATATA  
TTTATGACCCCCAAATTACCTTATTTTTATTTATTCATGAGAGACACAGAG  
AGAGAGGAAGAGACATAGACAGAGGGAGAAGCAGGCTCCTTGCAGGGAGC  
TTGATGCAGGACTGGATCACGCCCTGAGCCAAAGGCAGATGCTCAAATGC  
TGAGCTACCCAGGTGTCCCCACATTATGCTTCTTTTACTCACTCCTGACT  
TATCTCTCTATCCCTCACCCCTTTCCTCACCTCAGCTGCTTTCTGTCACT  
ATATATTCATTTGAATTTTCTAGTTTTATGTAATTGCTCACATATGTATG  
CTTATATAAATGCTGTTTATGTGTGTGCCCTTTTTTGGTCTTACTTATTT  
CACTTGCAATACCTATTTTGAGATTTATCTATCCAATTTGATAAGTATTC  
TTTTTTTTTTTTAATTTCCGGAGTAGTGTTCCTACTACGTGGATATACTACA  
ATTTGCTTATCTATTCAATTCCTTATAGATTTCTGGGTCTTTTCCAATTT  
TTGACTATTACAAATAAATCTATTGTGAATATGTACAAATTTTTATACAA  
AATAGTGTACGTATACCTTCTTTTGTCTTGCATAAAATACTTGGAGATGGA  
ATTACTTGATCATATTGTAGGTATATATTTAAATTTTTTAGGAAAATGTCA  
AGCCATTTTCCAAAGTGGTTGTCCAAGTTTACATTTGCATAGCAATGTAA  
AGGAGTCCCATTTTTGTTCTACATTCTAACCAATACTCAATATAATTCTT  
TTTTTTTTTAAATTTTAAACAATCTAGTCAGTATATGGTAGCATCTCATTT  
TGATTTTAAATTTGCATTTAAATCACATTTTCCAAATGCTCATTTACTATC  
TGTATATCTTCTTAAATGAAGTGTGTGTTCAAACCTGGACATTTTGGGGG  
ATTGTCTTTTTATTAGTGAGCTGAGAGAGTTCTTTTACATTCGAGTCAC  
TAGTCTTTTGTATATATGTATTTTGAAAATTTCTATCAGTCTGTAGCTT  
GCCTTTTCATTTTTATAATAGTATCTTTTAAAGTGTAGGTATTTTCAATT  
TTAAGTCCAATTTAACTTTTTTTTTTTTTTAAATGTGAAGTGTGTGCTTTC  
CTGTGTCCCTCTTTAAGGAATTTCAACCGAACCCACTGTCATTAAGATTTT  
CTCCTATATTTCTTTTAAAGTCTTATAACTTATAAACTTAAACTCTA  
TATTGAGGTCCATGATCTGCTTTGACTTAAGTTTTATATGTAGTGTGAGG  
GGAAAGGATTAAGGCTCCTAGTTTTGTTTATGGCTTGTCTGATTGTTCTG  
GCAAAATGTATCAAAAACATGATTTTTTTCTCTGTTGAATTTGTCTGGTT  
GCTTGTGTTGAAAATCGATTGACCACCTACATGTGGCTCTATCTCTAGACT  
TTCTGTTCTGTTACATTGATGTCTATATTGATGCTGATACCAGATGGTTT  
TGATTACTGTAGCTTTAATAGTGGTTTTGAAATCAGGAAGTGTAATTTGT  
CCTACTCTGTTCTTCTATCAGTGGAGGGGCTATTTTCAGGGGCTTCTGAA  
TTTCTACATAAAATTTTGAATCAGGTTGTCAATTTTGATGGACACAAAAA  
GCCTGCTGAGGTTTTGACTGGGGTTGAATTTAATCTGTAGATCACACTGG  
AAAGAATTGTGTCATCTTAATAATACTGATTTTTTCCTGACCATAAACATGGT  
ATCATCTCCATTTTTTAGCTTATTGATTTTTTTTTTCACTAATGTTTTATAG  
TTTTTCAGTGTATAGGTCTTAGAAGTATTTTGTGAGATTACCCCTAAGTA  
TTTTCAGTTTTTGTGATGCAGTTGTAAATGATATTTCTTTTAAATTTCAAT  
TTCTGATCATTCATTACTATTATACAAACATAATTTGTTTTCAAAAACCA  
TGTATTCTGCAAACCTACTAAATTCACCTTTTTTTTACATCATATTTCTGT  
CTGTATATTTATTACTTCTTCTTTTGCTTTATTGCACTACCCAGAACCCTC  
CAGTAATATGTTAAACAAATGCTCAGCTGAGACATCAATGGTTTTATTGCT  
AATCAAAGAGGAAATCATTTTCATCTTTTACCATCATGTATGGTATAAACT  
TTAAAATTTTTTATGTATTCTTTTCTCAGATTTAGGAAGTTTCCTGTTTC

TAGTGTTCTGAGTGCTTATCATTTAAACTACTCTTTTTTTGAGATTTTA  
TTTATTTATTTATTTATTTATTTATTTATTTGAGAGAGAGTGAGTGAGCA  
GCGGGGAGGGAGGGTCAGAACGAGAGGGAGAGAGAGAATTTCCAGCAGAC  
TCAGTGCTTGAGGTGGAGCCCAATGCAGGGCTCGATCTCATGACCCTGAG  
ATCATGACTTGAGCTGAAATCAAGAGTTAGATGCTTAACCAACTGTTCCA  
CCCAGGTACCCCTACCTGTGTTAGTTTCTAATTGTGAACTCTGTCTCCTC  
CACTCAGGGGTATGGGTTCCCTCCATGGGCCTTGAACCTCTCTCTAGGCT  
ATACCTTCAAGCAATCATATATTTTCATCTTGTTTTTGTCTTATGCTTATT  
TTATTTTTTTTCCAGTTTTATGAGATACACCTAGCATATAGCACTGTATAA  
GTTTAAGGTGTACAGTATAATGACTTGGCATATATATTATGAAATGATAA  
CCATAGTAAGTTTAGTTACCAGTTCACTTGCTTTTTTCTTCTCCTCCAGG  
TTATAATGTGCAATGTCTAAAAATTGTTTTCACATAGATATTTTGTATAT  
CCTGGCTGGAAGTGGAAGTTTCTAATTAACCTATTTTTACTTTTTTCTCCA  
AACTATTCAATAACTGTATGCTCTGGAAAAAGTGTGCTAAGTATATCCTG  
GAAAAATACCACTATACTTAGCGCACCAGTTTGCCAATTGAAGATTCACAG  
ATGATAATTTAGATTAAGAAGATGAAAGAATTAGAGTCTAGCTATGATTC  
AGAATTTTTTAAATCACTCTCAGCTAGTCAGATAAATCTAACAATAAATA  
CTTTGAACATTCAGAGTAAGAATTTTAAAAGTGACCTTAGATTAATTTCC  
TTGGACTATATGCAGTTGTTATAGTGCTATTTAGACTGTATAATCAATAC  
TTTCCAATTTGGTAAAAAAAACAAAAATGTATATATGTAATTGTCTTAAT  
GCTCCAGCTATATAAGAATAGGCCTATGGGTTTTCACAGCACTGTAGACT  
ATGTCTGCACCCAACCTGTATATTGTCTTGCAGATTATGATTCAATAGACC  
TGGAAAGCAGCCTTGGAATCTGTATATTTATTAAATACTGCACATGAATA  
TGAAAAATGTGCTCTGTGTTCCAAATACCACACTTTGGAAACAGACCAGG  
ATTGGTTTTGAATGAAGTGAGTCCCTGAATTTATGTTGGGGTGAAAGTTCA  
TCATTGAAGGTATGGTGTGTGCTCTTTGTCTGTGTTTTGTTTGAGAAT  
TGATATGTGTAGGTAAAGATGGTGGGCAAGAAGAAGCCCCCTTGACCTCTA  
GATACAGCAAGATCACAAGTATTTTCCTATGGTTATGTCAGGACTTTGGG  
GAATAGAGAAGGCTTATATAATTTCTCCTCCAAACCTGGTACTCATAT  
GGGAAGCTTAGATTTGCTTAATAAAAAAGAGATTTATGAAAGTTGGGGA  
AAATATATGGAATGTGTGAGGGCAATTTTGAAATCTGAGACCCTGGAGAT  
TTCCCTTAAACAAAGAAGAGACCTATTTATCTAGAATTGTTTGGATTAAG  
GCTCCCTGGTACTGTTGGGCTGGGAGGAGGGAGATTGAGACATCCTTAGG  
GATCCTTTCAGCTTTGTCTCTGTAATTCTACATGAATAATTAGCCTTTAA  
GGCAGTTAGCCATTAGCCAGCTTTCTTTCCACATACTCAACCCAGTACTG  
TTTCTCTTATGGTCCCCTTACCTACTGCAAAATGTTATTTAGAAGCTATT  
TGGTTTACACTTCTCCAAGGCTATTTTTTTTAGGATTTTTTTCCCTTGTCT  
GGAAACCAGTAATATAGAAAGTGCTGTTTTTTTGGAGTAATGGCAAGCTA  
ACTCAAAGGAAGTGAAGAAATGGTAGTGTGTGTGTGTGTGTGTGTGTGC  
GCGTGCGTGCGTGCACGTGCATGCATGCGCGCTCCTAAATATGAACCTCT  
GAGCTTTATAAATAGAAATCCTTTTCAGATAGACTTGAATAGGATTGACC  
CATCCTAATTACTTTCTATGTGACTAGTCCAATAGAATTGTGTAATGTGA  
ATATGTTTTAGCATTTGGCTCTTGTACAGCAGATGCTAATTTCTAAGAGT  
AGAGGCTTACTTCTTATTGATTCCAAATTGCCATAGTGCCTCTTTATATT  
TTTACCTTGTGCAAAAAGATTTTGGGGGAGTATGGGAAGAACTACAGAAG  
GTTTAGTATTTCTAGATATTTTTACTTTTTTTCCCTGTGATAGAGAATA  
TCATAGGGTTTTAAAAGCTTAGTCTTCAGAGTATGACACACTTATTTGCAA  
ATCTCAACCCTGACAAGCTTGCTTATGAAACTCAGTCATACCATTTACTT  
GCTAAGTGAACCTGGCAGCAATTTAAACACTGTACTTTGATTACTTTACC  
TCCCAAATGGGAAAAAGTAATACATTCTTCATGAAGTTAAGGAGATTAGA  
CGTATTGTATCATTGCATGTGGTAAATAGTAAATACTTCATAAAATATTG  
ACTAGTAGTAGTAGTAGTAGTATACCAGCATTTCTCAGAAGAATTAT  
TAACCATTGTTACATGAAGTTTAATGGAAAATAAACTTTGGAGTTGTAC  
TAGTTTTATATCATTTTTAATAATTTATTTCAGAGCTGTGATAATTTTTAGC  
TTCATACTAAAGTTTCTGCAAAATGTTTATCTTTCTGTTTACTTAGAGAAC  
ATATGAAAAATAATTCTTGCTGCTACATTCCCTGGAGCATGTGAGGTAAA  
GTTGTCTGTTTGAGAAGCAGCTCCATCACAAACCTAAGCTTTAAATTCAA  
AACATCTGCCATTGACTCATTAATGTTCAAGATGAAACTAATAATCTCCT

CACCTTTCAGTGTCTGTATTTACAAGAGAGAATCAGAGGAAGTAGTCTTG  
AGGAAAAATATTGATTCCCCGTTAGCAAACCTCTGTTGAAATGCACTGTTG  
TAGGCCTTGTTATTCTTAAGTGTCTGGATTTTCTTTATGAATTCATTAAA  
AAATGTTTTAGCGGCTCTGGTGGCCAGTATCTCCTTCCAACATAAACTT  
ACCACTGGAAAGCACATAACCATTTGGCTCACCTTTTCATTTTCATGGCTTA  
ATAATAATGACAAATTACAGGTGCTGAAATGATGTTAGATCCCTTAGCAT  
AACTGATTCAGGGCTCATATTGTTATTCTTTTCTCCAGAACTTCTTAATA  
TATATGGCATCTCTCTCTGATTGGCAGTTAATGTCTCACATGCTGGAATT  
CAATTTCAATAATCTGAAAATGATACTACCTTTTTTAAATTGGTAGTAACA  
TGGTCCTGTCATTATAGCTAATTTTCAACTTCTCTTTAAGAGTATAATGT  
ATATATTGTTGGATTTTCAAGTGGTGCAGGCTGAAATGCCTTCTTTAATA  
GAGTGTCTCTCCTAATCTGTATTTCATCTAAATCTCTCGATTCTTTCCCAA  
ATGAATTTTTACATATCTCACTCTTTGACCATTTGAAATATGTGAAAAAT  
AGCTGTATAAAACATCCAGTTTTTCTAAAAAGTTTATTATTAAATGGATCT  
TTGAAAGTGTGTAGAAATCCATTAAAGTAACCTTATACATTTTGATCCTG  
GTAAATTCACTTATCAAGTCCCTCTTAGCTTTGCTATAGCTTTTCTCTGGA  
AGCTCTATGTAAATGATCATACAATCGAATAATATAGTGCTACTTCTTCC  
TTTCTAATCTGTGTACTTTTTTTCCCTTGCTTATTGCATTGGCCAGGAA  
TTCCAATATAATGTTGTATAGAGGTGATTATGATACCTTTGCACTGTTTT  
ACATTTTAGCTACAAATTTTGCAGTCTTTCACATATAAAGTTTGATATTAG  
CTGCAGATTTTTTGTAGACATGTTAATAAAGGTGAGGAAATTTTCATTAT  
ACCTAATTTACTGAGAAAATTTATCATGATTGTATTTTAAATTTTGTAC  
ACTTATTTTGTGTATCTACCGAGATAGCCATATATATTTTATCTTTTAT  
TCTGTTGACATTATGAATTACATCATGATTTTAAAAGTTAAACCAGTTTT  
ACAATTGTTAGACGAAAACCCATTTGATGATGATACACCTGATAGAATTT  
GACTTGTTGAAATTTTCTTCAGAACTTCTGCTTCTGCATTTGTGAAGAGT  
ATTGATCTTACAATTTATGGTTAGCAATGAAATACTTGCTTTATGTAATG  
CATTGAAAAAGCTGTTTATTTTACTTGACATATTTCTATGGAATTAATT  
TTATTTCTTAAATCTTTGATAAAAGTCACCAGTAAAGTCATATGAGTCAG  
GAAATTTCTTTTGGGGAGGATATTCAATTGCAAATTTAGTTTACTTAACT  
GATAGGGGACAATTTAAATGGTCTATTTCTTCTTGTGTCAGTTTTGGCAA  
ATTTGTTTTTCAAAGTAGTTGTCTATTACATCCAAGTTTTCACATTTGTT  
AATGTCATTTTCATAATATCCATTATTATCCTTTAATTTCAAACTAT  
ATAGTGATGTTCTCTTTTATTCTTGATTTTGGTAATTTTATGTGATTAAT  
CTAGAAAGAGGTTTATTAATTTTATTCTTTAAAAGTAACAACCTAGCTATG  
GTTTCATTGGTTTTTAAAAATATTTCTGCATTTTCTTTTAAATTGTGTT  
CTATCAACTTCATTTCTTTCTTTTTTTTAACTTACAGTTTTAATTTGCTC  
TCTTCTTCCCTCCTCCTCCTGCACATTTCTCCTCCTCATTCTCATTTTCTT  
CTGCTTTCCCTCCTCCTCCTCAGTTCTTTTTTTTTTTTAAAGATTTTATTTAT  
TTATTCGAGAGAGAGAGAGAGAGAGAGAGAGAGATAGGCAGAGACACAGG  
CAGAGGGAGAAGCAGGCTCCATGCAGGGGGCCTGATGTGGTACTCAATCC  
TGGGTCTCCAGGATCAGGCCCTAGGCTGAAGGCGGTGCTAAACCACTGAG  
TTACCCAGGCTGCCCTTCTCCTCAGTTCTTAAGGTAGAAGCTTATATAAT  
TTAGATTTTTCTTTTTTTTTTCTAATACAAGCACTTAAACTATGTATTTT  
ATTCTATGCTATTGCAGGTGTATCTTACAGGTTTAAATATGTTGTGTTCT  
CATATTTATTCAATTTAGAAATATTTACTATATCAATTTTTTTCTTCATGA  
ATTATTTAGGATATGTTCTTTAATTTCTGTATTTGGATATATTACAGAA  
ATAATTCTTGTTCTTTTTCCTAATTTAATTCCATTGTAGTCAGAGAACATG  
TTTTGTTTAAATTTCAATTCCTTGCTAATTTATTGAGATTTATTTTAGAATC  
AAGTATATGGCTTATCTTGTTGAATGTACAGTTCATGTGCACTTGTAAGT  
AGTTTGTAATCTGTGAATTTAGCATGTGTTTTTCTGTAGATATAAACTAA  
ATTGGCTGATAGGTCAATCAAGTGAATTTCTATCTATATATTCTACCAAG  
TATCACAATATGAGCAATGAAATATTTTTTTTCCCAGGAGCATTGAAATA  
TTTAACTGTAATTTGTGCATTGTTCTTTTTTTTTTTTTTAACTTATGTCAG  
TTTTTACCTCAGGTGTTTTGATATTTGAAGATTAAACCACTAAATTTCTA  
TCTGAGATTCTGATACCAATTGTTTCTAGAATTAATAATGTCTTCCTAAT  
TGGGAGTGTATCTGGTCGGGGCAGAGTATGGAATAAAACAATCCAAGGAG  
AAATTGATGAGGGGCAGTCATCACAAGCATAGAGGGAAGGTTGATACTTT

TAGAAAGATGTGTTATGTCCAAGCGGTCACATGGAGCAGGGGATCAGGGG  
CTTTGACTGCAGGCATGGACACGGGAAGGCTTCCTGGCACAGCAGTGAGT  
TAGAGTAAGGAACAGATATCAAGGCAAAGGCTTATTTTGGATATTGTATT  
AGAATAATAAGGAGACAGGCTGAAAGTGTAACCATAGATTCCCAGTGCT  
AGTCCTGATAATGCCAGATATCAGGTCAAACCTGGGAGATTAATCTGGGTA  
GTAGATAGAACCTAATGAAAAAGGCACTAATTTTGATTCAAGCAACCTGG  
AGTTCAAAGCACAAAGTCTGGCTTACCTCATACGTTATGTTGTGCTTTCTG  
ACCATAAAAGAGATACTTGACTTTTCTATGCCTCTTTTCTCATTTTTTGA  
ATTGAGATGATATCTATTTTACAGTACCTATGTAGAATATCATGAAATTT  
AACATATAAAATCCACAGCCAGTTTATAGTAGGTTTTCTACAAATGTTA  
GATTTCTTCCTCCCTACAGAGAGCTAAATTTAGAGTGATGAATATAGAAA  
AAGAGAATATGCAGTTCTGAGGCATTTGTGTTGAGTCAAAATAAAGAATT  
AAAAAACAGTGCTTTTTTTGTGTTTTTGTGTGTGTGTGTGTGTGTGTGTG  
TGTTTTGTTTTGTTTTTTCCTCAGGACTCTCTAATGTTTGAAGGCTGGAAATC  
TTGAACAGAACTCTTTTCTCTGCTAGAAAAGTGAAATCCTACTGCTGAGA  
GAAGAGAATAGTCTTTTTCAGATAGATGCCACCAGCTACCAATGCCACCAG  
CTACCAATGATTACTTTTTTCCCATAGTTGTAGAACACATCCAAAAGCCAG  
TGACTACTGACAATTTTGCCCTTATGGATTCCCATGCCCATCACACCACCT  
GTTTTTCTTGAGGGAAGGGAGCTATTCTTAGATCCTCAAAGAGACTTCAG  
GGTTACTTTTTGTTTTTCTAATTTCTTACTTAACCCATTTTAGTAGAAAT  
CTTATTTAGCTATGTAAAATGATAAATAAAAACCCCTTCTATAACTATTT  
ATCCCTAATTATCTTATAAGGCCGCAGTTATCCTCCTGTATGTGCCTATA  
TGCATTGAAACACTCATGAATTTGGCTTAATACTTTACATTTCTATGTTT  
GTCTTCTTATTCATCCTCATTTGTGGCTCTCGTTTTACAGCCATCTGCTT  
TCAACAAATCCAGAATGACAGCACATTACTTGTATTGGTCTTCCACACCC  
TTCCCTGTCTTGCACAACCTGTGGTTAAATTGTCTTTATTTTCATGATTTT  
ACTGCCTGCCAAAGACGATAGCAATCAAACCTGATAAATCCTGAAGTGCT  
TCCATTAACCAATCAGGGGTGTCACTGCTGTCAAATCTGCCCTGAGAGA  
GGCCATTTTTGGTAGCTTAGAATCTTGTGTATGTGTCCACTGGGAATAG  
AAATGTTTAGCCCATTAAAAAAAAAAAAAAAAAAGAACTTTTTTTTGA CTCTG  
CAGCTAGTTGCAGAAACAGTTCTAGGAGCTTTAGAAAAAAAAAAATCTACT  
CCTTTCAAATTTTAAACAGGTTTGGTAATTTTCTTGTGCTCTTTGCTT  
GTTCTAGAAGGTGATTACACTTACTTGTCTTAAACATAGTGAAGAAGAAA  
CAAGCTTTGAAATTTACACTTGGAGACAATCAAAGAAACCACGAGAGAA  
TTTGTAGCAATCTGAACACATCAAGACACAATAACGATAGACAGGGCGGC  
AATGAGTGACACATGTTGCTGAGTGAGATTCTCTGCGTTCAATAGCACAA  
AGTTTGACGTTTAAATTGCAGGCAGCCCTGGGTCCATTCCAGGAGCTGCC  
CGTGGGTGAACACAGTTCTGATCACTTGCTTGAGGGGCGCAGTGGGGGTA  
AAGAGAAAAAAAAAGAAAAATCAAATTGTTCTCGGAAATCATGCTTAATGT  
AGAAATCTGGTTAATATTAATAATGCAATCTACAGTTTTCAAGTATTCTAT  
TCCTCAAGGAAAATATTTTCTGTTCAAGGGGCAGGAGCAGTAAGCACTCT  
CTTATTACATCACTTCCTATGTCAGGCCCAACTAGCATTCAAAATGTATT  
ACCGTATTGATAATGCTAATTTCAAATGATGCCTTCCCCCTCCTCCCT  
TTGGTTAAAGGGTCTGGGCAAAATCCAATCATATGGATCAATTTAGCTT  
TAGATGGTGCTGGCCAAACTGATATTTTCATGCACCATATAGAATATAGTT  
CTTCCACATGCTCAGGAATAGTAGCCATGTGTCTCTCTACTCATAGCGT  
AGCATTTCTATTTCCAATTTTTTTTTTCAAGAGAATAGCTATCTCATGGGTT  
TTAGAAGAGAATATCAGCAGCTTCAGAAGGAAGAGGCATCGCTTCTTTCT  
CTACGCACATGTAGCCATCAGTCTTTGAATTACTGGGGAGTTAGGAATTG  
ATTTCTGGAGCTCAATTTTGTGCCATGTTTCAAATCAACTTGGTATTTTTT  
CCCTGTAGGCTTAGCTGGCTTCACTGCAACACTCTCATCACCAGGAGGA  
CATGTGGATGTAACCACTGGTATTTACTCTCCCTTTATCCAATTTTTTTC  
TGCAAAGTCTTGAAACATGAAAGCCGATGACTTACTAGGATGAAATCTTT  
TCAAATATCTGTCTCTACATAATTACTCAGCATTTTAACTTTTCATTA  
AAAAAAAAAAAAAAAAAAAAAAAAACTACTAACAGAAAAATCAGTATGAGAA  
CACCTAGTGTTCTGGACCAGGAAATAATAGTTTCATTTGTCTTGAGTCCC  
TCAACTTCTTTGAAATCAATGGATGACTTGCTAGGTAGAGTTAATTGTAA  
CTCATGTACAATTAGAGTAAGCAGTGCTCTAAAAGGCTCCAGGAGAGAAG

CTTACTTCCGTTTAGGTGCTACTAATTCATGCTTTTAATTTTTTTGAAGA  
TTTCCTCCAGTCAGGAAATATTTTATGTTAAATTTATAGGCTAGACCTGT  
CCATGTTTATTTGTTGATATTCACAAATTTAGTGATATGACATGAGCAAG  
TTTTTTAGAGCTAACAGTAAGTTTAGAGCCCATGCTTTGCTCTTAGAGTG  
GCAGATGCTACCCAAATGTGATTAAACTTGAGACTTTATTCTTTCTAT  
CTCCTTTATATTTTTAAGCCTTCATAATGACTACATTTTCATGATGCAATT  
TTAGTGTAATTCAACTGAACCACTTGAAATTATAGAATTAATTACATGCT  
GTTTCAATTACAGTTGTTAATTAATTCAAGCCTCCTAGCTGACATCAGAG  
ATGGTCAGTTGGTTGAACAATGCCAGAGTAGGCATACATTTAGATATATT  
GCCCTATCATTTTTTCCATGCTAGCCAAATAGTACTTATAGTTAGCTAGAG  
TCTTAGGTTGGCCTTTTCTGAGGGTTAACCAGTGCTCATTTGACTTATGG  
ATATTTGCTTATTGGAGTGTTGTGGGATACTCACAGTATTGTGGTAGATT  
AATTGGCATAATAACCACCCCTCATATCTCAGTAACTTATTTCTCAGTAAT  
ATCACCACCTCCATGAGGGTCTTAAGAGATTCTCTGTTCCACAAAGTAACT  
CAGGGACCCAAGATCCTTCTTCTAGTAAGCTCCAGTATTTTTTAGAATAC  
TAATGGATCCTCTGCAGCTGTTGAGCTAGAAAGGGAGAGGTTGGGAATGG  
CAAAGGCATACTTATTCTTAATTGGTGTTTCCAGAAGGTGGTATATGCCA  
TTTCTCATATTCTGTGGTTGGCTAGTGTTTCATACACAACCAATTGAACGT  
AAGAAAAGGAGGGGAATGTAGCCTAGAAGCATACATATTCTGGTAAAATT  
TAACAACCTGGCTCTTCAGGAAGAAAAAATAAATAGATAAAAGCCCTGAT  
TCATACAATTTTTCCATAGTATAGATGACTTCTACCATTGCCTATTTTGAG  
CTACTGATATGATATCACTAAATATGGACAGAATTAGGAAGAGATGTACA  
CAGTCAGGCTTCACAAAGCATTTGTGGGCCTGCTTTGGCATACCCCTGCTT  
AGGAGTATGCCAGGGAGTAAGAGAACTTGGACAATGGTAATCATAGCAGT  
TGTTCTCACTTATGGTGTTAGAAAGATTGAGTGAGATGGACATAGGCATGAG  
CTCTGGTACTGATTGCTTCTTAGGAGTTCAGTGACTTGGAAGAGTGAT  
ATAGTTAAAAAGATATCCAGTATCTGCTACATAGTTACTATTTTCCAGAC  
ACCATCTCAAGTGATTGATATTTACCTTAACAACCTCTATAATATAGTTAT  
TAATTTTATCCTTATTTTACAGTTTAAATGGAGACTATGAGAGACTTAGTA  
ATTTGCTCATGATTTGTTCTCCTTAGGAATCCATAGTAAGCTATGTGGGA  
AAAGAGGCATAAGAACAGCATCATGTAGGAGAAAAATGATTTTAGATTTTC  
ATTTATTTATTTGAGAGAGAGACAGAGAGAGACAGAGAGACAGAGCATGA  
GTGGGGGAGGAGGCAGAGGGTAAGGGAAAAGTAGACTGTCACTGGGAAGG  
GAGCCCAACATAGGGCTTGATCCATCTTTTAAAGATGCTATAGTGTTAAG  
ACTTATGTGTATTGAGTACAGACAACTTTAAACAATCATTTACCTACTC  
TAGATAGTAGCTTGTTGCTACCAACCTACCCTAACAGAGGCTGGTGAGAG  
CGAATGCAGGTCAGGCTATTCTAAGCCCATTGAGACACTAACTGGCATAG  
TTTTCATTTCTAATCAACAGAGCTTTATTGAACACTTCTAGATGCCAGA  
CAATGTTCTAGGCCAGAGGTTAGCAAACCTTTGCACTACAAATACAGAGT  
TGAACAGCACCAACAGTACTGTATGGTCTGTAAAGCCTAAAATATTTATT  
AAGTTGCCCTGTATAGAAGAAGTTTGCTGAATCCCAAGCAACATACCAAT  
GGTACATCAGCTACATGTTAGCACAGCTTATGTACTTATGGAGCTTTGGT  
TAGTAAGGCATTCAAATCCAAATCATGATGAAAATGCCTATATTTTAATA  
TTGAGGAACTGCAAATAAAATGTAATGCATTGAAAGCCAATATCGATTTA  
ATTCCAAAATATCAAGATTTGGTATGGTGGTAAAAGCCAAAGAAAGAAC  
CCTGTTTGAAGTCTCAGGGTTTAACTCTATCTCTGTAGAATGACAGGTAT  
GTTGTTTTCCAGATGGTTTCCATGTCCTTAACATCCTTTCTTCCTTGTA  
AGCTGAGCCTGCTGAAAGGGTTGTTGGTAGCAAGTACCTTTCCAGTGCTT  
CTGGATAGCAGATGATAGGATACAAGGCATTCTTGGTCAGTTCCCAAATT  
TTCAAGAAGTTTCCAAGTGGGTAGTAGATGTGCACTGTTGATTTTTTAAAT  
TATACCTTAGCAGAAAGAATGTAAAGTAACTGAATTAAGGCAATTTTAAA  
AGAGGCAGCTAGCTGCCTCATTCCTGAACACTTCTTTTTCAGAGAGAG  
AGAGAGAGAGAGAGAGAGACGCTAGGGAGGGAAAGAAAGAGGGAGCG  
GAGAGAGAGGAAATAGAGATGGAAGAGAGAATCTTGCTCAGCCTATCAA  
GTGCTTCTCAGTTTTAATGAAGAACTGCTTTTATATTTGGAGCTTTTTTT  
TTTTTTTTTTTTTAACTTGACCAGACTCTTTCACCTTGGACTCTTTTGG  
AATTAACACAGACAACTTTGCTTAACTTAGCCTGTCTAGCCTGAAGGA  
GGAAGATGGTTATTATGTTCTAATACTTGAATACTGTCTCCACTTATCAA

AATCACGTAAC TCATTAGTAGTTGAAACAATCATCAGTGGATGTCCCAGC  
TCCTGACAAAATAGTGAGAAATGTCTGCATCAAGGAAGGTTAGGGTTTTT  
TTTAGGTTTTTTTTTTTTTTTTTATTCCTCTTGCGGTGACTCTCTTTTTACT  
CTACTTTCCAAATTAATTGTTAAAATAAAAATTTCTGACATGACAACTGT  
ATTTGTGGCCCTGCACCAAAACCTGCCTCAGTCCTTTTCAGTGTTCTTTG  
ATTTCTGTATTACAGTCCAATAGGGGTGAGCTTTGCTAAGGAGGACATG  
ATACTAAGATTGGCAAATTTTTTTTAAATTTATTTTTTATTGGTGTTCAA  
TTTACTAACATACAGAATAACCCCCAGTGCCGTCACCCATTCACTCCCAC  
CCCCCGCCCTCCTCCCCTTCTACCACCCCTAGTTCGTTTCCCAGAGTTAG  
CAGTCTTTACGTTCTGTCTCCCTTTCTGATATTTCCCACACATTTCTTCT  
CCCTTCCCTTATATTCCCTTTCACTATTATTTATATTCCCCAAATGAATG  
AGAACATATAATGTTTGTCTTCTCCGACTGACTTACTTCACTCAGCATA  
ATACCCTCCAGTTCCATCCACGTTGAAGCAAATGGTGGGTATTTGTCATT  
TCTAATAGCTGAGTAATATTCCATTGTATACATAAAACCACATCTTCTTCA  
TCCATTCACTCTTTTCGTTGGACACCGAGGCTCCTTCCACAATTTGGCTATC  
GTGGCCATTGCTGCTATAAAACATACAGATTGGCAAATTTATTTAAGCTATG  
TCCCAGGCTAGTTTGAATGGATTTCATACTTTGGGGTCCAATTGATTTACG  
CCCTGAAGTATGCTGAGAGCACTGGCAAATAACAAATTGATGAACCAGAA  
TCTAAAGAACTGTGGAGAGTAAGAAAGATGCCTGAGGGTGGAAAATGGGC  
ACACATTTGAATATTCTGGGTGGATTCTTCAAGCTCTATATCTGCTTGCA  
TTCAAAGGGAAAATTCAAGCACTTGGTAAAAGGAGCAACTTCTAAGCCTC  
ATGAAGAATTAAGCCCAATAACCAGCATGACTTCACGGAGAATGAACAAT  
GTCACACCAAAACACGTTTTTTTTTTTTTTTTTATTTTTTTATTTCCCTTCAGA  
AGTTGCTAGAGTTTGTAAACAGGACAGTATGACAGACATAAATGTAAGTGA  
TCTTCATCATGGCATGTCCATCTGTCCTCTAGATGATGTTCCAGTTAAAG  
AGTACTCAAGTCACACATATCTATATCCACGCAGATGCCCCATTGAAAGG  
CAACTAGAGAATATAAGGTGTAACTATTTAGGTAGTTCTGCATTTTCAGT  
CAAATAATAGGTGTATGGAGAGTTCATTTTCATAGCTCTTCCTTTATTCTT  
TTTACTCTTTTCACACATATTAATGTGTGTGTTTCCTTGCTTTCCATGCTT  
TATATAAATCACAGCTTTTATAAAGCCTTCTGCCAATGGAAAGTCAGGGA  
AAACTTTGTAAATTTCTTGGCTTATAATATTGAAAGAGGAACCCAAGACC  
TTAGCCTATTTCTTATGGAAGCAAATAGGGGAAGTTGAAACCATGATCAT  
ATTTTACATTTATTAATTAATGAAATCCTTATTCTATTTATAATTTATAA  
ATCTAGGGTCAGGAAGAATGAGAAAGTGGCAGGAATTATTGTAGAAATTT  
TTTTTTTATTGTACAAAATCTTAGTAACTACCTCAAGAGTCCTCATTAA  
GATGCATATTTATGTGAGATATAGATGATATTGTAAGTCTGTATAACTTA  
ACTCAGGGACTGCTTATAATACTACCCAAAATTCACCTAAAATTTTCATG  
CAGTATATGGTGTTAATGATTGTCTTATAGCATAACAGTCTGTAATGTTG  
TAGTATGGAATATGAAGTGAACTTTATGTATTATTATCTAAACACAGAAG  
GCTTCGTTTTCTGATAGAAAGGTTATAGGACTGAATAATAAAGTAGCTAT  
GTTCTAAAATTACTTTAACATCTACAGTCTAACCTGACTGCCATTGACTC  
ATCTTTTCTACACAGGGAGAGTGACAATGACTCTTATGTTGTATAGATTT  
GCTTAACATAAAAAATCAGCTAGAGAAATCGGCTGCAAGAAAGAAAGGCA  
TTGTGGAAAACAACATTCGTTAAATTATTATGATACATCATGAAATCTAA  
CCAACTTTATAATCAGTCTAGAATGTACTTATATTCTTTCTGTTATTACT  
GCACATGCATTAATTTTATTCAACATAAAACAAATGGGGGAAGACAATA  
GATTTTCTTTCCAGATGGTGTGAAAACAGCAAGGTCACACTTGAAGAAAG  
GCTGTCCCTTTTTACAGAGAACTTACAATTTATCACTTCTCATTTAGGTT  
ACAAAACCTTGTTTTTTCATATTTTTTCACTGGATTCTTTGGCTTCTGATCC  
ATTGGAAGAGAAATGTATAGATCTTAGAACTAACCTGCTCTTATTCATC  
TGTTAAGTATTGAAGGCCTGCCTCTTCCCCTACTCTTCTCTGAGATTTTT  
ATTGATTTCTTTCTTTTTTGGTCTCAGATTAGCATAGCACTATGCTGGAAT  
ACCAAAAGTTACTGGCAGAGGTGGAGAGCAAGCAGCTCATTTTTTCAAGGA  
CTTTACAGTCTGTTCTCTGCCTTAAGTTGCTCCAAGAGTTCATTCTCCTA  
TGACTTCTCAATATTTTCATAATTAGCTGCCAGAATTTTCATAATTTGT  
AAACACAGTAAAATGGCTGTCAGACATTTAGTATGGTAAAAGTAGAGGGA  
AAAAAAAGACCAGCTTCCTTAAACCATTTACATTTGACTTGGGGAGAAAG  
CTGGGTCTGTGCCACAGCAGTTAAATGATCAGGCCACGACTCAAAGTG

ATTTTTCTTGAGGTGTCACCTGCCACACACAACCTACCATGTGTTCTTTCTT  
GGCTCAGGCTGGCTTTTGCTGATCTTCCAGAACTCTGAAGGCTGTACCCCA  
GCCCCAGTTTTTACATCCATTTTTCTCTGCCAAGGTGAAGGCAGCAAAAAC  
CACACATGTTTTTCTTTCTCCCTTTTCTCGGTGGAGTTGATTGCCTCCGG  
ATGAACCATCTTCCACATCAGCGAACACTGGCATTTCACCTGGCACAATG  
GCCAGGCTGGATGTGGGACACGGAGGGGAGCACACAATGGAAAACAAGTC  
TACATGGTAACGCAAGTGGCAGCTGCCAGACAACGGCACCTTCCATGTCT  
GTAGTCCAAGCTGGAAAACGGGAATTTTGAGCAAGAAAATGTTGAGGAAA  
GCTAAGAACAAGAGCAAAGAAGGGTGGGAAGGATTGTGGAGAACCAAAAG  
TATGCTCTGGACTTAGTTCTCAAAGAAAAACAATAAAACAAGAAATATA  
GACAGACTAGAGGTGTCCAATCAATTAATTTTTTGCCAAATAAAATTTTAT  
ACTTTCTAATAAGATGTTGAGAAAGATGATGAATAAAATACATAAACTTG  
CACTCTATATTTTTCTCCTGAAGTCCTTTAATTCCAGTCAATATTCTGATT  
ATGAGTTCAGTTTCCAGCAAAAGTTGTTTTTTTTAATCTTGCATCTATACTG  
CTGAAGTATTGCTGAAGTACTGCTGAACACTTTACAAAATATTACATTCA  
TTGAATTCCATTAAAGAATATATACATATAGAAGCAGAGAGTCCTAAGAAA  
GGTACATACCAAAATACTACCACTGGTCATATCTGGATGGTGGGATTATG  
GGAGATTTTAGTTACCTACTTTTTATATTTTTTTTCTTATTTTTCTATAAT  
CAATAATAGGTTGTTTAATTTTAAAATACAAAGAATATTAATGATCTTTT  
TTTTTGAACTTAGAAAATTCATAGTCAATTAAAGCTGAGTTCTGGGACA  
TTAGTGTTAAGTCAGAGTTCCCAACTATTCAATACTTCGTAGAAATCTGC  
TTTGCATTGCATCCTCCTCCCTCTCATTGACGAAGCACGACAGTGTGTG  
AGATCTTGAGTCTACGTTATCTGGACTGGCTTATCCCAACATGAATTTCA  
TAGTTCCTTACTTTGTTTTAGACTGTCTCTTCCTGGCCCTCTCTGTAAAC  
TATCCGGTTTACTTATTTTCTGGGTTGGAAGTACTATTTGCACTTTACTC  
TGTTCAAGATGAAATATTTTGTCCCCCTCCTTTAAAACTAGAGACTTAA  
TCATTTCTGCTTGTCTTAAAATGAATGTATCCTCTGCTAGAAGTAAAAGG  
ATTCTTAAATAGGATATAATGCTGATAAAAGCATTTCCATAATTGGGTGA  
AGACTGTTCCCGGGTTTTCCATCGCTGGCATTTCAGCCTGTCTGGCAT  
GTGAGTGCTCCAGCTCTACTGCCCTTGGCTTATGGAACTTCCACCTCA  
CTTTCATTGTCTCTTGGAGATACAGACTTATATTCCATCCCCAGCCCCCA  
CCCACATGCACATCACACACAAACCTATGTACGCTTTTGGTCTCATTAGG  
ATATAAACCTTGAAGACTTTTTTTTTTTTTTTTTTTTTTTTAGGAGGGAA  
GAGGTAGTTGGCCAATGTATAATGGCCTATGTCTACCATTATAGTATCCT  
GCTGAGTGGTTTCACGGCCCCAAAGAAAGATCCTCTGTGCTCTACCTCTTT  
ATGCTCCTCTCTCTTCTAACTTGTACATTTTATTTTTTTTTTAAAGATTTT  
ATTTATTTATTCATGAAAGACAAAGAGAGAGAGAGAGAGAGAGAGAGGCA  
GAGACACAGGAAGAGGGAGAAGCAGGCTCTATGTAGGGAGCCTGATGTGG  
GACTCAATCCCGGGACTCCAGGATCGTGCCCTGGGCCAAAGGCAGGCACT  
AAACCGCTGAGCCACCCAGGGATCCCCACACACTTCTTTCTAATTGTG  
AATCTGGGTAGCTATTTTGCAGAAATGCAATGATTCTTTCCTGGAATA  
TGGAAGAGTAGCCCATGCACATTCACATTTATGTGGCTGCTTTTTTTTTTT  
TTTTTTTTTTTTTTTTTTTGTAAATGTGGCTGCTTTATTCAGGGACTTTA  
CTGAATCTTCATCAGAGTATTACTAATCCCTGGAGCATATAACAAGAAAC  
TATAATCTTGTCTTCTTAAGCAAATAAGATATTCTTGAGACATAGTCAT  
CTGCTGGTTTAGCTGTGAAATCTCAGAAGTATGTCTATATTGGTAATC  
TATTTTCTGGCTTCTGAAATCAAGTGAGATGCTGGTTTTATTTATTTATT  
TATTTATTTATTTATTTATTTATTTATTTATTTATTTATTTTGGAGCA  
GTTTGTCTTAATTTTGTATTTCCTATATGGGGAAGAACTACCCCCCCGA  
ACTCTATAGTGCATGCAACAGATCAAAGAAGCATAGACTTTATTTAATTA  
CCTTCCTGATTATTTATGGTTGCAATTCAGGAACATGGTAGATGGAGTAGA  
TCTCTTTCCAGCTACAAACACCTTCTGCATTATATGCAGAAGGGAATGA  
GGGTGGAGATATTGTTGCACCATCTTTGGAAAATGTGATCTGTTACAG  
CCTTCCCATCACAAAGGCCATATGATTCTTTATGTAAGGGATGTTCTGGA  
CATGAGAGCTTGAGCAGCTCACACATAAGATAGGCTGGAAATTCCAGGAG  
GGAAAAACCCCAAGAACAACATGCACCCAATAATAGAAGGACATAATGAG  
CAATAGTATATAGTCCATCTCCTTTTGTGTTGGGAAAACCTTGAGTCAAGT  
TTCATGCTGTTTTTAAGAGTTGCTCAGTGGGATTGGGTTCAGTGGCTCAC

TACATCAAAGCTGCTTAATGAAGCTCAGCCATACTGGGAAAAACAGAGCT  
ACCTCAGACACACAGTCTTATTGAATTTTTTTTCCCTAATACCTTTCAT  
AATTATCCATTGTACTTTTACTAATTTAACACTAAGTGTCAATAATAATA  
ATAATAATAATAATAATAATAGTCAACAATATACTAACACTAATAATAGC  
TAAATTTCTATCAAGTGTTCCTGTGGATCAGGCAATATTTTAAGTGTTC  
TGCATTTTTCAATTCATTTAATACTGTTACTGATAGTATTATTAAAATTC  
TCTTTTTTTAGAAAAAATCTCTTTTTTATAAGGGAGGGAACCGAAGCTCA  
GAAGCGGAACATTAGCTTAGTCTTTATTATAATAATACTAGGGTTATTGC  
AAGACCTTTCTAATTATCCCCACCCATAGTCTTAGAAAGTCTATCTATAT  
AAGAAATCTCAGTATTCCAGACTTGTGTTGACCAGTGACTTGCAGTGGAAA  
CCCTTTAGGTGAAAGACATCTGCCCATTTCTGGACTACAGATAAACCAAC  
AGATTTTCTAGTTTTATTTTTCAAAGTTAGGAAATAACCAACATTTTCAA  
CAATGAGATCATGTATATGTTTGTGTGGAGAGTATCTGAGGCTTGTCTAG  
ATCCTGGAATTTGCTGTCCGGTTTTGTCAACAATACTAAGAGGTCACCTCA  
CGCTATCTTTAAATTTCTGTCCCATTTATGATTTTCATGCTAAAACAATGGAT  
CATTAGGTCTAACAGCTGGAAGATGGGACTTGTTTTAGCCCCCACTGTAG  
ATGTTTTGCTGAATGAAAGTGTACCTACCAATAATGTGTACTTTCTCTT  
CCTAACATAATCCTTAATGCCTCCTGCAGAGGAAGGACCCCTAAGTTCTC  
TACCATAAAAGAGTGTCTAGAATAAAAGATAGAACCTTCACCAATAAAAG  
CTCCTCACATTTTTTTTTTTCACAGAAACAACCTTCATTTTATAGTATTTAA  
GACTTTAATTTTTACGATTTCCCATAGACTTATTTTAAAATTTTTTAAA  
TTTAAATTGAATTTGCCGACATATAGTATAACCCCCAGTGCTCATCCCAT  
CAAGTGCCCTCCTCAGTGCTGTACCCAGTTACCCCATCCCACCACCCA  
CCTCCTCTTCTGCAACCCCTTTGTTTGTTCCTCAGAGTTAGGAGGCTCTCA  
TGGTTTGTCTCCCTCTCTAGTTTTTCCCACTCAGTTCCCTCTCCTTTCCCT  
TATAGTCCCTTTCACATTTTCTTATATTCCATGTATGAGTGAAATCATAT  
GATGATTGTCTCCAATTGATTTATTTCACTCAGCATAATACCCTCCAGT  
TTCATCCACATCAAAGCAAATGGGGGGTATTTGTCTCTTCTGATGGTTGA  
GTAATATTCATTGTGTATGTATATACTACTACTTCTTTATCCATTTCATC  
TGTCAAAGGACATCATGGCTGTGGACATTGTTGCTATGAATTGAGGTGC  
AGGTGTCCTGTTGTTTCACTACATCAGTATCTTTGGGGTAAATTTCCAGT  
AGTGCAATTGCTGGGTCTAGGGTAGCTCTACTTTTAACTTCTTGAGGAA  
ACTCCACACTGTTTTCTAGAGTGTTGTACCAGTTTGCATTCCCACCAAC  
AGTGCAAGAGGGTTCCCCCTCTCCACATCCTCTCCAACATTTGTTTCCT  
GTCTTATCAATTTTTGCCATTCTCACTGGTGTGAGGTGGTATCTTATTGT  
GGTTTTGATTTGTATTTCCCTGATGGCAAGTGATGCAGAGCATTTTCTCA  
TGTGCTTGTGGCCATGTGTATATCTTCTTTGAAGAAATTTCTCTTTATG  
TCTTCTGCCCATTTTCATGATTGGATTTTTTGTTCCTTAGGTGTTGAGTTT  
GATAAATCTTTATAGATCTTGATACTAGCCCTTTATCTGATATGTCAT  
TTGCAAATATCTTCTCCCATCTGTAAAGTTGTCTTTAGTTTTGTTGAC  
TGTTTCTTTTGTGTGTGCAGAAAGCTTTTTATCTTGATTAAATCCCAATAAT  
CATTTCAATTTTTGCTTTTGTTCCTTGCCTTCATGGATGTATCTTGCAA  
GAAATTGCTGAGGCCAAGTTCAAAAAGGGTGTGCTGTGTTCTCCTCTA  
GGATTTTGATGGATTCTTGTCTCACATTAAGATCCTTCAACCGTTTTGAG  
TTTATCTTTGTGTATGATGTAAGAGAATGGTCCAGTTTCATTCTTCTGCA  
TGTGGTTGTCCAGTTTTCTCCCCATAGATTTATATTAGTAGTATGTCT  
GCAGCCCTCCAGAAATTTAGGAAAACCTGAGAAGTCAACAGGTATCCAGAAA  
ATTTCTGATAGGGTAAGACATAGTATTTTAATTATAGTAGTTAACACGAG  
CATTTCTTGGTGACTAAGCTGACAAGCCCATTCAGTACATGTTTGACTCCT  
CCCCAGCCAGATGATGGAGGGCCAAACCTGGGTCTCTTTGAGGTGAGCAA  
GATCATCAATTTGGTGCTCTTGTAATTTGGCTTTCTCTGTCTAGGTGTTT  
ATTCTGTGGTTGCAGTTTCAGGTTGTGGTTTCAGGAAATCACTCCTCTGAGC  
TATGTTATAAAGGAAGCTCAGAACCAATGGGGGACCTTATTGTTACTGCT  
AAAAACTGGCCACTTAGAAATTATAATCCAGAGGTATCATTCTAGGAACA  
AGCATCATATCAGTAGACTAAGATGTTCAATTAGACAAAATGGTGACATT  
GGACAGCCCGGGTGGCTCAGAGGTTTAGCGCCACCTTCGGCCCAGGGTG  
TGATCCTGGAGACCTGGGATCAAGTCCCACGTTGGGCTCCCTGCATGGAA  
CCTGCTTCTCTCTCTGCCTGTGTCTCTGCCTCTCCCTCTCTCTGTGTC

TTTCATGAATAAATAAATAAAATCTTTTAAAAAATGGTGACATCTCAGC  
TTCATTCCCTTATGGTAAGGATGATCTGAAGAGGTGCTGGTGTCTTAATAA  
TTTGACATTATTTTTAAAAAATATTTTATTTATTCATTCATGAGAGATAC  
AAAGAGAGAGAGAGAGAGAGAGAGAGAGGAGAGACATAGGCAGAGGGAGAA  
CCAGGCTTCCTATAGGGAGCCTGATGTGGGACTCGATCTCAGGACCCTGG  
GATCATGCCCTGAGCCAAAGGCAGATGCTCAACCACTGAGCCACCCAGGT  
GTCCCAATATTTTGACATTCTTATCAACTTTTTGCCCATGGATTAGGTCA  
GTGGTTCTCAGATATAACATGCATCAGAATTACCTGGAGGGCTTGTGAAA  
ACATGGATTGCCGGGACCTATTCCCCAGTTTTCTGATTCAATAGGTCTGGG  
GTGGGGCTGAGAATCTGTATTTATAACAAGTTTCAGGTGATGATGATGCT  
GTTGGTCTAGAGATTTCACTTTGAGCACCTGACAGACAACTTGTCTGTA  
ACGGCAGGGGTTTCAGGAAATTTCTACCCTGTATGCTTTACCTTCTGTTCA  
TTTTTTCTGCTCAGATGCTGCCTTTTAGATTATGTTGTCTTATATTTTTT  
TTTCATTCCCTTATGGTCTTAGTTATTTTTAGTGGAAATTTAGAGGTCCA  
ATCTTATTCAATATTATCCTCGCTATTCATGCCAGAATGTGTTTGCTTAA  
AATACAATTCTGGCCATTTACCCAATTTAAACTTTTTAAAAAATATCCTAA  
CCTTTCAAATACTTATTTAAGGATATTATCTTACCTGTGTCTTCAGCTG  
CTTATTTTGTTTTATCAGTTAGGATGCTTTCATCCATTAAGCAACACAGA  
TAACTGAATCAGTTAGGTCTTGGTACATGATATACCATCCCCAAACTCAG  
CAGCTTAAACTTGCTCATGAGTCTATGGGTGAGCTGGGCAGCTTTTCTG  
GCCTTGCGTGGGCTCTCTCATAAGTCTGTGGTCAGCTGGTGGCTGAGTAG  
GCAGCTCTGCTGATCTTGTCTTGGCTTTCTCTCATGTTTGGGTGTCGGCT  
AGCTGTATGCTGGTCTAGAATGACCTTAGCTGAGACAACTAGGCTCTCTT  
CCATGTGGTCTCTCATTCTCTATAAGCTGGCCCAGGCTGGTAGTCATGAC  
AATGGAAGAATTCCAAGAGAGCAGAGACAGTCAATGCCTCCTGTGGTCTA  
GGCTCAGAACCAGCATACCATCACTTTTGTCACTTAGTATTGGATAAAGC  
AATTCTTGCAGAGTGGGCAGATTTTGCAGTTATAAGGCAGAGAGCATGCA  
TTCAGAGATGTAATTAATTGAGACATTCAATGCAATTTACTTGTTTACAA  
AGTAAAAGTTGCTTATACCTTACATAGATTAATTATCTCACATGATAAAA  
GCCAAGATTCCGTGCAGAACATAAATTTGGCTGACTAAATAACTCAGTAA  
TGTCATTGAGGGCACAGATACTTTTCATCTTTTCCTCTCAGTCATTCTCAG  
TCTATTGGCTCATCCTCAGGCTGGCTCATTTCAGGTTTCAAATGGCTGT  
CCACAGTAATTAATGAAATATGCTTCAGAGTTTGCATTTGATAGATTCAT  
TTATCCAGGAGCCCATGGAAATTCTTTTTGTGTTGCATTGGTTCAAATTG  
GCCCATGCCTACCCATTTTTTAAAGCAATCATATGTTTTGTGATGTAATTA  
AGAGACTTTTCAGACCAAAAGTGGTTTAAATAACTGAGGCCATCCATTTCT  
CATTTAGAAAGAAGTCTCAAGTTCTTTCATGTACAAACAAGGATAGAGTT  
ATGGTGGCCTGGGATAGGTTCAATAGGTTAATGTCAATTGGGTAGTCAGGC  
TCCTCCTATTTTTCTTTGTTACCTTATGTGCTAATGTTCTCACCTCTCAT  
CTGCAACTCCAAGCACCGCGTCTTTACTCAACACCTAAAGGTCAGAAGAA  
AAATATGGGGAAGAGAGTTAGCCTCATGCTTTCCCTCTTATATTAAGTG  
GGAAAATCTTTTTTTTTTTTTTTTTTTTTTTTAAAGTGGGAAAATCTA  
TGTCAAAAGTCCCTGAGCAGGTCTCCTCTTATGTCTAAATGGCCACATCA  
CTCCTTTTGGCTGCAGGGGAAGCTGGGAAAATGGATATTGCTCTGGCACT  
CACTCTCTCTGCTCTCTCTCCTTCATGAGAGGAAAACTATTTCAGCATG  
ACTGAAAAGACAAAAAAAATTAATAAAAAAATAAAAAAACCTGTATT  
TGCAAAACTTGGTGTGTTTTTGCAACCTTTGAACATATTAAAATGCTATCT  
CTTTAAATAAAGGCTACATAACTCCAGACACTTGGCCTTTATGCACTTG  
AATTAACACGCAATGGAGGCTTAGATATTTCTTACTCTTATATGAGTGC  
GAATAAGTATTTATGAGAAGCTGAAAGAAATTGGTGCATTGAGACATTGC  
TGGTAGATTAAAGACACAAATTTTATCTGGAGAATGTTTTCTCCAGGTCAA  
AACATTTATTTATTGTCTGTGACTAAGTCACATGAAAATGAGACTAAACA  
CTTGCTCTCTGTGAAGTTTGCCCTTAGTTAGCATCCTTTTGCAGATAAGTT  
TTCCACTCACAGTACTGCACTGGAATGGTCTAGCATTCTGATATCAGTA  
CATTATATAGCAATTCTGTTTTGACTCTAGAGGAAGTGTCTGTATCTTT  
GTTCTGTCTTCCATCTATCATTTGTACATTTTATTGAAAAGGAGCCCT  
TTTCATAGGCTGACTGTCCCTTAGAGTCATAAATTTATTCTAAATCTTAC  
AAATGAGCTGTTGAATGAATATGTTATCATTTACAAGTTTCCATTGCACA

TAAGCAGGCTTATACTCAACTGAAAGGACCAGATAATTAAAGGAACAATT  
TAGGGACACAAAGGTCTTCAGATTGCTTAGTACATTCAAAGTGTGATACA  
CCGCACGACTTTGGCAAAGACTTCCTCACATTTCAAAGATTTCCAATTAC  
ATAGTGATTTTTAACAAATAGATTGACTTCTTCTAAACAGTGCTCTTACT  
TTCTCCTGGTTGATGTCTTTAAAAAACACAGGTAAAGGAACATATTGAAA  
ACTATCTGGCTAAAAGCATGCTACGAGACACGCTATCTTACTTGTTTTTT  
CCTAATGGAATATAAATGATAGGCTATGAGTCACTCATCACCATTACCA  
TCCTAAGCTTAGCTATCAAATGCTGGCATGGAAGAATGAGAGGCATGTGA  
TGCAGAAGAAGAGGATATGTCAGAGAAGCTTAGAAACAAAGGGTACCCCA  
AGGTTAGTAAATGCTTTTTCTCTTGTAGCTAAGCCGGAGCTTCCTTTTTG  
AGGGGGCTGTGATTTTTAGCCACTTCAGTTAGGAGCTTAGTTGAACAACG  
AGAATGATTAGTTCATTTCCAGTCAGAGGTTATTGTTGCAGGAATGGTT  
TTAATATACACAGGGTTTTGGCTTCGATTTTTGCTTTCAAACCTCCAGCAA  
GTCTTGAATTGTTTATTGAATCTAGGTTGAGAAACAGAACCGAGAGATGA  
AGCTAATAATAATTGGCAAGAGTCCCAATCCTTGTGTTATTATGGTCATT  
AATTAGGGTAAGGGTTATGTAGGGAAAGATTGCTGATTTGATTCACTTGT  
TTCCAGATCTTTACTTGGGGGAAGGGACTGTAATTAGGAATTCTGTTTCT  
CTGTAGGTAAACAGGTATTGCATTAGGAAGCAGAAATGATGCATACTTAG  
TAGATAATTTGTCTCATTGGCAAATTAGTCAAGGGAGGATACACCATCTT  
TTCTTGATCATCATTTTTCAAAATCAAAACCTCATTATATCAGTCAGTAGA  
ATACTCAGGATAAGAGAACTTTATGGAAAATTGACAGTAAAAAATTAGT  
ACACTGCATATTCCATTTACTTTCTTTTGGGGTAACTAAAGGCTAATGCT  
GCATCATCTGTGGGGGGTGGGTCCACTTGATTAGAGAAGGATGTTTCCCA  
GTGTTGTATAAAAGGGCTTGACTCATACATAGGCGGGGAGAGGGTCCCAG  
CACTGTGATACCTGAGGAGCTCTGCATCTTAGAACTGAGGTAACCATTG  
ACAAATTTTCTTATTCTCTTATTTTTTTAATTTATAGAAAGTTTCAAGG  
CTTCCCAATTCAGATATATAATAAATATGAGCAAAATGTTAGCTCACAAA  
TGTCTGTTTTTTTCTTATTCCCTCCCAGGTGTGTCAATGATGACATGGTG  
ATATGCTAAATGGGAGAGCATGTGTCTAATGTGATAGTTTTTCTGGAT  
GAACATATGTATATATTTTATTGATATTAGTTACATTTGGTGTAGATAA  
TACATTAGAGAATGAGCTTTAGTAGATACAGACATGTGAATCAATGTAGC  
ATAACCAAACTACCACCCTACCAACAACAACACAAAATTAAGTCCTGA  
AGATCTCTTTTATTTGTGAGAGAACTCCATTGTTGGGTCTCTTGCAACA  
TCTTTAGGGACTCCTTTTTTTTTTTTTTTTTTTTTTCTGTGCATCTAC  
ATGAAATGATAGGAAGTAGCACAGAGCCTCAGTTAGGGCTCCTGATAAGC  
AATAGCCTTCATGTTATCTTTTATAAGATACTTACATGGAAACCTCAGGT  
TTTCAATTGAAAATACTAGTGCATGGGAGGGTGTGGTGGTGTGTGTCTACG  
ATGTACTAATGACAATAGAGTGTGTGGGTGTAATGTATGGCAAGATCCCA  
CAGGGCATCTCTCTTCAGGTATTTGAAGTGCCAGGATTGCTCACCACACC  
CATCTTGGTTTGGAACTCTTCACAGAACAGGATACTTCAGGCTAAAGC  
CTAAATGAGTCTCCTTCTTTGAAAATAAAAAGAGAAAAAGTATATATGAA  
ACCAATTCTACTTCCATTTCTAGAGTCTGGTTGATTGGGATATAAATAAG  
TTTAGATTCCAATATGATGGCCATTATATTTTAGGTGGGATTGGTCAGAA  
ATGAGCATGGAAAGATTGCTGCAGCATGTGTTTGGCAGGGCACCTAGAGT  
CACTTTATTTTCAGAGCCTTGCCCTGGGAATTGCGTCTCTATTTATATTAA  
TATTATTGCATCTTTCCATCTACATTTGTAGATATGATTTAAAAATTACT  
CATCCATCCATAGTAATTTCTGCACAACTCAACTTCATCCATGGAGTTTA  
ACTGACAGTCAAAAAATAGAAAAAATGTGTGTGTGTGTGAATGATTAT  
TTGGCATAGAAAAAATCCTGAGAAAAAATAAACAATTACCTACCAGAAGC  
TAGAGTGGCCCTAATAAATTGCCCTTACCTGTCCTGCATTAATTAGGAGT  
TATGCTTAAGATCTGGATCTTCATAGATGCTCCTTTTCAATTTATCTTAA  
TTTTATCTGTGCTGTGTGTCTTTTGGGGAAGAAAAAGGATATAGTGGCT  
TTCAAAATTAGTGACCTAAAAATAAAATTACAGATTTTCCTTGTTCATC  
CATAAGCTAAATGTAAAAAGAATACACATAATTGCATGCCATCCATTATA  
CTTGTGTAATTTCTCTCTATGCCTCTTTTTCTTCAAAAGCCACCTCAAT  
TCTCTCATGCAATTTACCTTGAATAAATTGAAAGCAACAGTATTGTCACA  
TCTACCATAATCATTATCAATATATCTGCCTCAAGCAGTAAGAGCTTCCC  
AGAGCTGGGTTTTATTAGGCAACCTGATTGACCACTCTAATTATATGATC

AATAGTATGAATATTAAGAAAATAACCTTGGGGGCGCCTGGGTGGCTCAG  
TTGGCTAAGCATCTGACTCCTGTTTTTGGCTCAGGTCTTGATCTCAGGGT  
CACAGGATCAAACCCACGTAAGGCTCTATGTTGAGCATGGGGTCAGCTT  
GTCCATCTCTTTCCCCCTCTGCTGGTCCCCCTACTCACACTCTGTCTCTC  
TCTAAAATAAATAAAATCTTTAAAAAAAAGAATCTTGGGTGTGTGTTGA  
GTGATTTTCTGCATTTTGACGCTTTGTTGGAGACAGCTATTTCCCTGCCAC  
CAAGACTGCTCCCTCCAAGGCAATCTCAACCCTCTTTTAGCAGATTCTTC  
CAATATTTATCTACATATTTCCAGTTAATGTTTGAAAATATCACTATTCC  
TTTTTCATTTTGAAGAATTATTTCTTGAACCTTTATAAATGGAATATGGT  
AATTTGATTATTCTTTTCCCTTATCCTTAGACTAAAGAATCCTATCTTCTC  
TTTGTTCCAGGAGATGATTTGGTATTTATTACTAGACCAATTCACCTTCTT  
TTTTTTTTTAAGACTTTATTTATTTATCCATGAGAGACACAGAGAGAGAGG  
CAGAGTCATAGGTAGAGGGGAGAAGCAGGCTTCTCACATGGAGCCTGATGT  
GGGACTCAATCCTGGATCCTGGGATCACGACCTGAGACGAAGGCAGGTGC  
CCAACAGCTGAGCCACCCAGGTGTCCCCAATATTCATTTCTATATCCCAT  
CATAACTGAAAATATTAGTCACAGCTGAGTCATATAGTATACTATGTTCA  
TTTTTCCTTTATAATTTTTTTTGGTGACAGCCATTTTCTTTATTTTTTTCC  
TTTGTTTTGATAATTCAAGCCCAATTTTTGTCTCAGGTCTGTATAAGATT  
CTCAATATGATTATAGACATTTGATAATCTGTAAATTTTCATCTTCTGACA  
TGATCTTCCAAAACATTCTGACATACTCTAATCAAGATTGATTGCTATTG  
CGGTGCCTGATTGTTTCAGTCAGTCAAGCATCTGACTTTTGGTTTTGGCTC  
AGGTCATGATCTCAGGGTTGTGAGACTGAACTAGTGTGAGGTTCTACACT  
ACACATGGAGCCTGCTTCAGATTCTCATTCTCTCTCTCTCTTTCTCTGCC  
CCTCTCTCCTCCAAAATAATTTAAGAAAAAAGATTGCTAACTATACTGG  
TGCACAGCTGCTATATTAATAATTTTCTTAAACATCATCTTGGTTTTCCCT  
CACCTCTTCCAAGTTTGTCTTCTATTCTCTAGAACTCAAATCAAGATGTC  
TTGACTCTCCTTTAACTAAATTTAAATTTAGTACGATGTATAAATTT  
TATTGTGAGATAATTTTTTCAAAAATTTGTGAAGACATTTTTTCATAGT  
CTCCTGCATTTAGAGGTAGTGTGGAAAATCTATTATCACAGACTTCATG  
ACATTTATATAAACTCACTTTTCTTACTACAAAATTATAGGATTTTTT  
GCTGGTCATAAGAGTTGACATTTCAATGGTATATTTAGGTATGGGTCC  
ATTTTCAGTCACTATTCTGTGGACTCTGAATCCTTCTAAGTCTGGAGATGG  
ATCTCCTATTTGAGGATGTTGTCTTGGAAATGTTTATCTGATTATTCCCTT  
TCTACTATTGTTACCATTTTATCTGTTGTCTCTCTCTCTTTCTCTTTTTTTA  
TTTCACCGACTTCATCTCCCAGACTTTTATACTGAAGTTTTAAAAAATTCA  
TTCTTTTTTTATTTCCAAAACCTTTTATGTAAGTCTGAAGATACTTTTCT  
TCTAGAATCTGTTCTTTTTTTTTTAGATATATTACCTCTTTGAAAATATT  
TTTGCTATTTTTTATTACTCCAAATACTTATACCACCAAATGTCTCCTGC  
TTGCTTATTTTGTACCTATTTTTTATATTTATTTTTTATTTTAATATTTTA  
CTTATTTATTCATGAGAGACACAGAGAGAGGCAGAGACAGCAGAGACAGG  
AGAAGCAGGCTCCATGCAAGGAGCCCCATATGGGACTTGATCCAGGAACT  
CTGGGATCACACCCTGAGCTGAAGGCAGACACTCAACCACTGAGCCACCC  
AAGCATCTCTTGTGTCTATTTTTTAAAGATGTATTTATGTATTAGAGAGA  
GAGAGAGAGGGTGCAGGGGGCAGGACAGGTAGAGGGAGAGGGAAAGAATC  
TCAAGCAGACTCCGTACTGAGCACAGAGGCTGACATGGGGCTTGATCTTA  
CCCCCTGAGATCAGGGCTCTGAGATCATGATCTGAACTGAACTAGGAG  
TTGGAAGCTCAACCAACTCTGCCAGCCAGATGTCCTTATTTTGAATCTAT  
TTTTAACATTATGTTTCCTTTTTTCAAATGCCTGGTGCCTGGGACCCTAGAC  
TGTTGAAGTTCTTTAAGGTGTGGTCTTCCCTGTGTAATGATTCTGATGAGGC  
AATTTCCCTTGTAGAAGCCTAAATATAGTACTTAAATCTTTATTCTTGGTA  
TTGTTGATTTTTTCCATTAAAGAGACGTTGTATTCCCTACATGTAAGTAAG  
GTAGACTTCTGGCTTCCAATGTTCTAGAATTTAAGTGAACAAAGAAAATC  
AAGAAGTACCTTCTCATCAATGGGCCTGACTCAGTGTAGGGACTTTCTGC  
TTCACTATCTCTAGAACTCTAAGTCTCCTACTATGATGCCGGATAGGACA  
TAGTAGGCTTGTTGCAGGTAGAGACATAACTACTTCTTACTCAGAAGGGG  
AGTGATTCTGGTGGGGAATAGCAGTTATAATTTTGTATAGGTTGACTTCT  
TACCTATCTTTTTTTTCCCTACCTCCACCCTCAATACCAGAAGTCACTGTG  
CTGCCATTTCCCTGAGACTTAGAGGACATTGTATGGTCAATGAAATTACAT

TTTGGCCTTTTGTCTATCACTTTAGGGTTAAGCTTCCCTGGTATACGA  
AATCATCACCACCTGTTTCGTTTACTTCCCAGCTTAAAAAAAACAGAACT  
TCTATCTTTTCTCAGGTTCTCTTTTTCCTTGTGGGATTCTTTGATCATTA  
ATTATTTGGTTATTATTGCTAATTTTCTCTTTAGGAGGTAGCAGCACTAC  
ATCACATGGAAATAAGGTCAATCTTTATAATCATCTCTAGTGTTAACTTG  
TAATCTTTAATGAAGCAGGTGCCAAGACAGAATTAGATAGATCAGAAATG  
TACTGATTGAAATACTTAGGGAGAATAAAAAGGAGAGGGATCAGGAGTAG  
GAGGGAAGGACCTCCGGACACGATGCAGGTTTTATGTTTGTGAAAGGACA  
GAGGGAAGGAAGGAACTTTGAGTAAGATGAGACTCTTGATGCGACACAGC  
TCTGAGAAAAGCTTGGTCAGGCTGGTAGGCAGTTTTAACACTGAGATTGC  
CCATTAGAAGAGTTGCATGTCAGGCAGTAGTGGTCTTGCTTCATTATCTG  
TGCTGTGTTTCAGTCATTGGTTGAAAAAAGCCCATGGGGAGTTGGGAACAT  
TGTGACAAGTCAGAGAGATGAAGCACATGGAGGCTGTCAGCCTACAACAC  
TCCTTGTTAGCAGAGTCTGTCTTGAAGGAATATCTGGTCAGTACTTGCCCA  
TGGTCACCATATCTCTGCTCTGTGAGAAAGTATCGAGTACCAACTTTATG  
TAAAAGAAAGTATTAGTTACTGTCTTAGTCAGTTTGGACCATGGACTGGA  
TGGCTTACAGAAGCAATAGAAAATTTTTTCTCATAGTTCTGGAGGCTGGA  
AGTCCAAGATCAGAGGACCAGTATTATAGAGTTCTGGTGAGGGTTTTCCG  
GGTTGTAGACTTCTGACTTCTTGTGTATCCTGACATGGTGGGAAAATAG  
CAGGCTATATCTCTGGCCTCTTTTTATAAGTTTGCTTATAAGGTTCTACC  
CTCATGACCTAATTCCTCTCAAAGGTTCAAGTATCCTCACATTGAAGAT  
TGAATTTCAACATATAAAATTTTGGGGGGCACACAATTATTCAGTGCATAA  
CAGTTACTATTTCAGTAGTGGTGCAAGAAAACAATGACATCTTTCTTTCAA  
AACATGAAATGTAGTTTAAAAGACTGACATGGAACACTAGGATTACTTTC  
CCGTGCAAGATTTTCATGAATGAATTCCTCATTTAATTCCATAGCAAAAATA  
AAGCATCACCAGACCGTTGCCCAAATCTGATAGTAATAACTCAAAAATAT  
ATTTGGAGTGTGTTGCTTGCTTCTCCATTGCCAGCATTATCTGTTGTGCG  
CACTATCTGCTATAACCTTCCAACATGAGGACTTTCTCGTTCTTCTGCTC  
AGCTACCATTTCATTTCAGTTGCCATAGAGCAGCCACTCTATGGTGAGCACT  
CTAGGGTGTGCATTTTCAAAAATATAATCAGATTCTATCACTTTTTTTTAA  
AAAAGATTTTCATTTATTTATCGGAGAGAGAGAGAGACAAACAGAGGGAG  
CAGCAGAGGGAGAGGGAGAAGCAGGCTCACCCTGAGCAGGGAGCCTGAT  
GTCGGGCTTGATCTCAGGACCTTGGGGTCATGACCTGAGCTAAAGGCAAA  
TGTGCAACTGACTGAGCCACCCAGGGACTCCAGATCCTTTCACTTCTCAA  
AATACCTGCGATGATTTCAAATTGCTCTTTAGTGATATCTAAGTTGTTT  
GTATGGCTTGAAAGCCACACGTGGTCCAGTGCATGCCAGCTCATCCTG  
TACTGCTGTCTTTTGCTCACTGCACACAAGCCATGCAGGCCTTTCTTCC  
TTCCAGATCCTCAGGCTGGCCCATGCCTTTTGTCTCCAGCCTGCCCTTGT  
ATTCCTTCTGTCTAGAATGCCCTTTCCCTGTTCTTCTACTGCTGCCTCT  
CCAACTATATATTTTCAGATGTCATGTAAGTCACATACATTTGATTTGGAG  
TGCTTGTAACCTGAAGCAGAACCAAGACCCCAACTTTTGTGATTGGCACT  
TATGTCCATCAATAGCTACCTGCACTCAGAGGGCTGTTATTTGCTTTCT  
TGGGAAGGTTGAGAGAACAGTAGTAAGAGTAAAGGAACACTTCCATCTTG  
GGTCTCTTCTGTCAATGGGTTAGCCAAATATCTCCTTTGTAAATGCAAAT  
TATCATTTGAACTGGTAGAGTGTTAAATATGAGAAGACATTGATGTTTGG  
AGGACTAGCTGAATAAGATGGATCATTTACAGTATAGTTGTATGTTTAAAT  
TTTTAAATTACAGATAAATGTGTATCTGGACTGCTTTCAGATCAGTAGTA  
TAGTGCCATACAGTATAGCAGATCCTCAATAAATTATTTTGAATTGAACAG  
GTAAACACTGGAAGCAGACAATTTCTATGTAGAAGACTGTATCTCAAATT  
TGTGGTACGCTGCTTGCCACAGAAGTTAAAAATCTAGAACTCATGAATAT  
TTGAGGACTGTTTGCATGGTTGTAAGTGAGAGACATTGAGAATTAATTAT  
TTCTTGCTTCATTTCAGCTCTCTTGATTCTAACATGGTATTCTCACCTAT  
AAAAAATGAAAAAAGTTGAGAGAAAGATAGTTCTGAAGAGAGAAAACAA  
GCGGATTTCCATTAAACCTGTTGCTCTTTTTTTTCTATGCACTTATTTCT  
TTGTCATTAAATAAAGAATATATGGGAATAAAATTTGTCCCCCATCCTAT  
ATTATTGCTATAGTATACAAACTGTTAAATAGATTATAAAATGTTTCATAC  
CGTGTTGATTTTCTGTACCACAGATTTGGCAAGCCTTTTTTTCTATACAG  
GACCAGATTTGCAGACCACATGATTGCCATCCTATATTCTTCTCCTCCT

CCTTCTCTTTTTTCTTCTTCATTTATAACCCTTAAAAATATATTTTTTTTA  
AAAAAGGTCATGGCAGGGCAGTGATTGGGGGCCAGATTTGACATGTGACT  
GACCTGCATAATAATCCAACGAATTCACAAAAGTAAAAATCAGACAGAA  
GTTATCATCTGAAATTGTTATACACACAGTGAGGGCAAAATGTTAACTC  
TAAAAAATATGGGAGACTTTGTAATCTAATTACATTCAAGGAAAAATTAA  
AATGTATATTTGTATAGCAACAGGAAAAATAAGACCAGAAATATGCAGCA  
ATTCTTATATATACATATTTGATAGTTTTTTCCTGCCTTCTGGGTATGGGT  
TATAAAAACCTTATTGGATTTCTAAATTTATGATGAGGATTTCTAAGTTTT  
GAGTTAGATTACAAGCAAGACAAAAATATGGATATTGCATATTATCATGG  
GAAAGCGGGGTGGCAGGTTGTTTCCCAGAGTCTCTGGAGATTATGATTGG  
TGGATTTATTTTTATACTAGCTCATGTACTATCAAGTCTATGCATGCAGA  
TTGCATAAGCACTAGTGATTGAGAAGGGTTGCTGCCAGTAGTATACAGGT  
AAATCTGCTCTCTAGAAAAAAAGTATTTACTGATTTTAAATGGTGTAGATA  
CTCCCACTGTGGCCCACTCAAGCTACCAATGGTTTTAGCATTCATCTGAGA  
AAATTCATGAATGTTTAAATAATCAGCTCTCTGAACTGGCAGGAGCAGACC  
CCAGCATCGCCCTACTTGTCACTCACTAAGAGAGTGGTAGCTGTGTCTTG  
AAAGCTGTCTATTCTTTACTATTCCAGATAGACCTGTGTTTAAATTGATAT  
TTCTAAGGAACTATTTAGAAAACTCTGAGCATGGCAGCTTGCAAAGCTT  
AATTACCTACTTCAGAGAATGTATGCTGACCCTAATCTATGGTAACATTA  
CCTGAATTGGAAAAAAAACAGTACATTTTCAGCCATCTCTAAAGGCATAT  
GTTTGTAAATGGAAGTCCAAGGAAAAATATTTTTATCTGAAAACAAGATA  
GGAAATGTAGAAATGCAAGCATAATTAAAAGTTAGAACAATATGAATAAT  
TCAAGAAGTGAACCCAAGTTAGGGTATGTGTTTTTGCTTGGAATGCTTG  
CCATTTTAAATCCCTAAGAACACACATTTTAAAGTTTTGCCATTATTAGCA  
AAAGGCAAGGAGCAAGTGGAACTCTTATTCACAGTAGTTCTTATAGTTAC  
CTACACCCTTATTAAGTGATCCAATGAGTCCACTCCTAGGTATGGTTCCC  
AAGAGAAATGAAAACAGATGTGCACAAGAAGACTTGTATCAGAATGCTTA  
TAACATATGAATTCATAACAGTCCCAAAATGGAGAAAACCTCAAATGTACA  
TCGGGATGTGAATGAATAAAAAAAAATTGTGGTGTACTTGAAAAATGGA  
ATATTACTAAGCAACAGAAAGGTTGATTTACTGTTACGGGCAACAGTATG  
CATGGAATTCAAAACTTACACAGAGCAAAAGAATACAAATTCAAAAGAC  
TATATATACTACAGGATTTTCATTTTCTGTAAAGGACCAAGAAGCTGGCAT  
TTTAATCTTTATGGGCAATTACTTAATTCTACCATCATAGCCTAAAAGCA  
GTCATAGACAGTATGTAAATGAATGACCATAGCTGAATTTCAATAAAACT  
TTGTTTTTTTACACTGAAATTTTAAATTCATAAATATTTTATGTGTAAATGA  
AATATTATTCTTTTATTTCTGTCTTTTCTTTTCAAAACATTTCAACATGG  
AAAACAACCTACAATATCTTTTAGCTTGTGAGCCTTACAAAAAAGGATAGC  
AGGCCACATTTGGTTTATGGGTCATAGTTTGCAAATCCTTTGTTTTAGAC  
CAAACATATGCTAACATAAATGTCAGAAAACAGATAGTTGTCTGGGGCCAG  
GCATAAAGTAGAGTTGACTGCCAAGGGGCACAGGAGCATTTTTGGGGGGT  
GACGGAAATGTTCTATATCTCGATTGGAGTGGTGGTTATACCTAAGAGTA  
AATATTTATTAAAACCTCAGCAACTGTAACCTTGAAAAAGGACATTTTATT  
ACATGCAAATTATACTTCAAAAAGTTGCTTTTCCAAAAGAGTAAAGATAA  
AAAAATAAAATAAAATAAACTGCAACTAGAGATAGATGTATTTATTTTAT  
CCTATCCTCTCCCCAAGCCTGCACTAGCTTGAAGACTATTTTCGCATGGTA  
TTGAAGCTCACTTAGGAGATAACAAAATTTTCTCAGCTGACTAGAAATCA  
ATGAGGTTTTTCTTAGCAATATTCAGGGAAAACCTGAAGGCAAAGGAAGG  
AATTAGCTCTTAACTGTTATCATTTCCAAGGTCCATCTAGTCTAGCAAGA  
TATGCCAAATTTAGAAAGTGAAAAAAAATTTAAGGGGATCCCTGGGTGGC  
GCAGCGTTTTGGCGCCTTGCCCTTGGCCCAAGGGCGCGATCCTGGAGACCCG  
GGATCGAATCCCACATTGAGCTCCCGGTGCATGGGGCCTGCTTCTCCCTC  
TGCTGTGTCTGTGCCTCTCTCTCTCTCTGTGTGACTATCATTAATAA  
AAAAAAAATAAATTGAGAGCTGCTGATTGATCATCATTAACATAT  
ATTGTATAATCATGGAAGTGTGCTAAGAAATTAAGGAATCCAAAAATAT  
TTTAAAAATGCCAAATTGACATAAAGGATGAAAGAAAGTCACATACTAAT  
AATTGCAAGAATCAAGCCTGATATTAACTTATTTCTAATACTAGTACTAT  
TCTCAATGCTTTACCTGTACTATTTAATAAAATCCTTGAAATATCTTTAT  
GAGGTTGATGATTTTATTATCTTCACTTTTACATGAAAAGACCGAGGCTT

AGGTTAAAAACCTGGCTTAGAATTGCTGAGTTAGAAAGGGGGCAAGCCAG  
GATTGAATCCAGGTTTCAGTAACCCCTGGGCCCTCAGCTTGATAAAACAGG  
AAAGAAGATTTTTCTCTCCCAGAAGACTTGATTAAGAAAGAAAGGAAGGG  
AGGGAGGGAGGAAGAAGGAAGGAAGAGGAAGAAGGAAGGAATTCTTTTCAT  
AAATGCTTAGGGGATTTAAGGACATGGGAATATAAGTACCTTAATTTTCT  
AAGCCCCATACTAAAGGGCCTGGCTCTTAAGTAAAGTGTGCAAAAAAATGC  
TTGTGGAGCGAGTTAATTGATTAAAAATTTTCCCCTAGAGTGTTTTGGAT  
TTAATACCTCAGTTACTTCTTTTTTCTCTCAAAATTTTGATATTTGCTTA  
TCTTCAGAAATTCGCATTCATTAACCATTTTATAGAATGCAGTTCAGTGG  
ATTTAGTAGATTACAAATGTTGTGCAACCACCACCTCCATCTAATTCTCT  
TTGTCCAACTTTTAAAAACCACATAAATACCAACTTTTCTGCGTTATTTA  
CATGTATTAAGACCCAGGACAAAAATATGGGCCCAACAAGAAGTGTTTTT  
GATCTTAAGTCTGCTGCTTATCTCCAGCAATGTAAAAGCTCTCTAGACATT  
TGAGGCTTACAAATCTGGGTACCACCAGCATACTCTGCTAGCTGTTGAAT  
GAAGAACACATTCACAAGTCAAGACAATCTTTTTCAAGATCAGGCATTTG  
CTGGTTATGCAAGCTGCATTGCTGATATTAGTCCAGTCGCTTTTATACTC  
CTCGAGTATGTCATTCCACTTTGATCACTCACAGCGCTTGCTGACTTTCT  
GGGAAATGAGTAAGAGTGTTTCATTCAACCGTAAGCATGTCCGGGACTAG  
GCTACAACCTCTTAGAATTCTCTTCACTGTCTTAAATAGAGATAGGGAAG  
CCTTGATTTGAAGGCAGTTGCATGCTGTCAGGTGATGTGGAAGTTGGA  
TTGTAGACACCTGGGCTGTTATATTACTTCATAGGCTTGTTTTATGGCCA  
CGATTGATGCCAGATGAAAGTTGCTCGGGCAGGCTGGAGCGCTTACCCAG  
GTGAGCATATATAAAGGCATTCCGATAAGGAGAGAGCCACTGGGCAAATC  
ACCACCGGCTCTCAAAGTTACCATAGATTGTTATCAACAGCCGACATCT  
GTTTACTTCCTTAACCTGTGACAGCTTATCAAGGTCCCAGATGCGTGCAC  
ACCGAGGATGGAGGAAAGAATGTAATGCAGCATGGCTTCTTTTATTAGTT  
GCTGCTGTCATTATGCATCTTCATAATTGAGGTTTGTGTTTTTCCTAGAG  
TAAGATGCATGTGTTTGCATCAGATTACTTTCTCGTGATATTTTATAGAA  
CCTACTGAGGGAGAAAAGAACAGATAGAAGAAAAAAGGAAAGAAAGACGG  
GAAAGCAGTCTTTATACTATCACCTCAGGCTTCCTCCCAGACGATGCACC  
TGTTCCTTTTCAAGTTCCTTTCCAGAGTGAATAAGAAAACGATTTTATTAT  
ATCACGACCTTCGGTCTAAATTCCTTTTATAAAGTAGTGGATAGTGAGA  
CTCCAAGTATTGCAAGTACTACCGATAGAGTTAAAACGTATATCTGAGGA  
CGATGGCTATTTTTATGATGGAAATTAATAATGTGCACCAAGAAAACCGG  
GGTTGTAATGTTTAAATGTCCATAAGAGCATATTGATTGACAGCATGAA  
GGATTAACATTCATCGAGAAAGAATCATGTAAGTGCCTAAACAATGTGA  
TTACTTTTTTCCCCAATGTCATTTAAAAAATCAGATATCCAATTCAAA  
CAGAAATTATTAACGACATGGGTATATGTGTGGTTGGTCCCATTTCATTT  
TTATAGTGTGACTCAGCAGCTGTCCTGCATTCAAGGCAGTTGATCGTTC  
TAATAATTCACTCTAATTAATACTCCTTTCTGATAATGGCCCCTCTTGG  
CGTAATCCACCAAGGGAAGCTTTGAAGTTGGCTCATGTTACCAGCAGGAA  
TCATGATAACACGTTTTTGATGCTGCTTAGACGTTTCTGTCCCCAAAGAT  
CCCCAGATAGTCATCTTTCCATTATTCTTACATTTGCTGTCCACTTTGAC  
ATTTTCCTGGAAAACCTCTAATCTCCTATGGTTTTCTCTATGGGTCTAAT  
GTTTTCTTTTTACTGCTACCCTGAGAGCATCATTTTATGAAACGACACT  
GGAATGAGGACAGTAAATGAACTGTATGCACGCGCACACACACAAAAA  
GTATTTTAGCTATGATAGAAATGACACTTTTATATTCAACCATTTTTAGA  
AGATCCCTGTGACTTTCCCTTGCTTTGTACAAATAATCAAGAAATGTACAT  
CATTAACCTGGAGAAAAAGTTAATTTTATTGACCTACTGTTTGCCTGTTGT  
TCAGTGTGACTCTGGTCTACACAGAGGTGATTGAGAGAAATGTTTTAAA  
AAAAAATTAGTGAAGATCTGAAAGTCAAAAAACCTTTTAAGATAGTACA  
GCATTCTAACTGGACCCGATGTCCATTATCTGATGGAAAGACCATTTATT  
TTTTCATGACTTTGTTGTGCTATTCATAGTGAACCTTTTCAGCAATGCCACC  
CACTTTCAGTGTTTTCTAAAGTCTTGAAGATATGTATTCTTACCATGGAAA  
CCACAGGCTCTAATAATATTTAATTGTTATCCCCTTGTTGTGTAATTCTA  
TACCAATGAGGGGGTGGAAAAGTAGTAACTGTTATCACCAAGTGTAGCAT  
TTCATAACATCTTTGAGTAGACAGAAATAACCTCCTTCAAAGGCATTGAG  
GGACACTTTGATGTAGCAACATACTGGTCACTGGAAATCACTCATCACTG

AAGGTCTGTTAAAACTTTCTCCAGACATTTGTTTCTTCCTGTTTCCGTC  
ATTCCTTAAATACCAACCTTTTGTCAACAGCTTTTAGTCCTTAGGCTGCA  
GGCTTGAATACCTGTCATAAAGGCCTGAGTAGAAAAAGAATCCTATACTT  
TCTGGAAATTCTCATATGGCTGAACATACTGGAGGGTTCAGGAGGTCCCC  
CTGCACTCAGATTCTATTCGCTTAACTGTTTGGACACCAACCACGTGAA  
AAGGAACCTCATCCAAGAATGGATTATAGCCAACAACCTCTGACATGAAGAC  
ACAGGTAGAGTATGAGGATGTGGACTTCGTAGATGTTTATGTTTTTTGGT  
ATTAGGAAGATTTAAAAAATAACATATCAACCTTATTGATGTGTAA  
ATTACATAAAATAAATTGCACCAATTTTTAAAAAATTTATTCTTTTTTTT  
AAAGATTTATTTACTTATTTATTCATGATAGATATAGAGAGAGAAGGAGA  
GAGGCAGAGACACAGGAGGGAGGAGAAGCAGGCTCCATGCCGGGAGCCTG  
ACACAGGACTCGATCCTGGGACTCCAGGATCGCGCCCTGGGCCAAAGGCA  
GGAGCCAAACCGCTGAGCCACGCAGGGATCCCCCAAATTGCACCAATTTT  
TAAGTGTACATCTTGTTAAGTTTTGAGAAGTGTATCTATCTGTGTGACAC  
CTCCACAAGCAGGACATAGAATAGTTCTTTTACCCTCGAAGATCTTGTCC  
CCTTCCAGACAATTCCTGCTAACCTCTGGCCAGAGGCAGACACTAATTA  
GACTCATCTTTTCCAGAGTTTCATGTAATTTAAAGCTCAGAGTGCATACT  
TTTTGTGCAAAGCTTTTACTACTCAGCTAATGTTTTTGAGATTCCCTCCA  
ATTGTTGTGTGCTTCTAATTTATCCCTTTTAATTGTTGATTAGTGTCTT  
TTGCATGGATATACTATAATTTGTTTATTCAGTCACCTATTGATGGACAC  
TGGGTTGTTTCCAACATGGAGCTATAACAAATTAAGCTGTTAAGAGCATT  
CATGCACTAATCTTTTTGCAGATAGATATTTATGTTTACTTTTGTTAAAT  
ATGTAGTATTGGATCACTATGTCCCATGGTAAATGAATGCTTAGCTTTAT  
AAGTAACCGACAAGCTGTTTCCAATGGAATTGTACCATTTTTTCATTCCCA  
CTGGCAGTATGTGAGAGTAGTGATTGTCTCACATACTTGCTAAGTCTTGG  
TGTTGAGATTCTTTTTAATTTTAGTCATTCCAGGGTGATCTCTCTGTAG  
GTTTATTATTTATTTATTTATTTCTCTGTAGGTTTGAATCACTTTCATTAC  
CTTGAGTAATAATGCCGAACCTATTTTTATGTGCTTATTGGCTATTTGTA  
TACCTTCTTTGTGAAATGTCTGATAGTGTGTAGAACAGTGTTTGCCTAT  
TTTTATAGGATTATTTGATATGCGATTGAATTTCATTTTTGTGTGTGTT  
CTAGATATAATTCCTATGTCAGATACATACACTGCAAATATTTTCTTCCA  
GTCTGTTGACTATTTTTATTCTCTCATCAGTATCTTCAAAGTGCTATGAC  
TCATCTAAGAAATCCTAACCTATTCCAAGGTTGTAGAATTTCTCCTGTGC  
TTTCTCTGAAGTTTTATGTTTTGAATTTGTATGCTTAGTTCTCTGCTG  
CATTTCAAGTTAATATTTACATGATGGAAGGTAAGAGTTAAGGTTTGTTT  
TTTATATTAATAAATATTTGTTCTTACCCTATTTCCCTCTTTGTATGAAA  
GACTATCCTTTCTCCCACTGAATTGCTCTTTCAGGTTCAATAAATACCCA  
TATACATTTTAGAATTACTTCATCAGTTTCTAAAAACATGCCCGCTGTT  
ATTTTTGTTGGGATTGCTTTAAGTTTACAGATAAAATTATAGACATTTTA  
ACAATATTGAGTCTTCTAATTTATAGCCATGTTATAATTCTCCATTTATT  
TAGTTCGAAGCATTGTTTTGTAGTTTCTTTATGCAATGTTTTGTAGTTTT  
CAGTGACAGGTCTTACACATATATTGTGAAATTTATACTTAGATATTTG  
ATTGCAGTCAAAATGCTATTTTTATTTTCAAGTTACAATGGTTTATTGCTGC  
TATATAGAAAAATAGTTTATAATTTCTATATTAATTTTTTCCCATGATCTT  
GATAAACCTGCTTAGTAGCTTCTAGCTTGTTTTGTAAATTATTTGGAATA  
TCCTAGCTAGATGATTGTCATTTCTAAATAGTCTTATTTCTTTTCTTGCA  
ATATACATGCCATTTTATTTTTTCTCTTCTTAGTGAATTAGCTTAGGATC  
TTCAGCAAATTTTTAGTAGAAATAGTGAGAGTAGAACTATTGCCTTGTT  
TCCAGTCTCAGTGGGAAAGCATTGCTTCTTTGTTTCATTAAAAATAATATT  
AGTATAATTGTTTTTCCATCAAAGGCTGATAACTGGTTGGAGAAATTTCC  
TTCTGTTCCCTAATTTCTGAAAGTTTGCATCATGAATAGGTATCAGATTTT  
GTCTTTTTTATTTTCTGTATTTATTGTGATGATCATATGGTGTTTTTCTT  
TATTCTGTTAATATGATGAGCTTGAATGAATAATCTTTTGAATGTTAAAC  
CAACCTTCTACAATACGTAGCACATTCCCTGGAGTGTTCTGAATGAGTACA  
GAGCCATTTTGGGAGAGAGAAGTGCTATTTTCCGGAACCTCTATAGATAG  
TGCTTTAAACATAGAAATACTATTAACATACCTTATAGTCACAGGTTAAT  
GTGTTCTTGGAATATGTGGAAGACCTGTTCACTATTAAAGTGTCTTTGGA  
TGCTTCCTGAAGCATTTCAGAATATGCAACAGAACCTTAGGAATGTCTATT

TTTTTTTTTTTTTAGGAATGCCTATTTTAAAGGATGTTTTCATCCTGTAA  
CCACGAGACCATTTTAAAGGATGATTTTTTTTTTAAATCCCTCTATATTTGT  
TTCCCATTGCTGCTATAACAAAGTACCGTAACCTTAGTGGCTTAGAATAA  
AACACATATATTATCTTACTTCTCTGGAAGTCAGAAGCTTAAAACCAAG  
GTGTTGACAGGACTGCATTCAATCTGAAGGTTCTAGGGGGGGATTCAATC  
CCCTGTCTTTTCCAGCTTCTATAGGTCTCCTGTATTCCCTCACCTGTGGTC  
CCTTTCTCATAGCACTTCAGTTCTGCTCCCTTCCTCACATCTATTCTGCT  
CTGACCCTCATGCCTCCCCATAGTAAGGACCATTGTGACTGAGGATAATT  
TCCACATATTAAGATCCTTACTCATGTCTGCAAAGATGCTCTTGCCACTT  
AATGTAAGATAATCATACATTCTGGGGATTAAGCCATGCACTTCTTTGGA  
AGTTATTATGCCTAACACACCTCCTGACATCTTTCCCCAGGAAAACCTAC  
ATGCTTTCCATAGTTGTGGAATTAGCATTTGGAGGACATGTCTTTCTTTA  
GATGATGAAGTCATCTATGACCCTTACATGGTATTTTATGGGATGTCAGC  
TTGGGGCTTCAGTGTCTTCAATAAGTAATAGTCTTTGCAAGTTATATCCTG  
GATAGCATGGCGAATATTGCTTGGCCCGTTGAAACTATCTCAATCATGTA  
TCACTCTTGTATATAACTCAACATTAGCCATGAAACTGTGGGCACATGAT  
ATATAATAACAATATTCAGGATCATACTACTCTCTCCTAGAATATCTAGG  
AAGGATTTTATCCCTCCTTTCCCTGATGCCTACCAATTACAAAAAGAGCC  
TGTGGTTACAGGATGAAAAATCTTACATTTTCTCTGTTTTTGGCCTAGAT  
CATGGGGCGTGTTAGATGCCTGGTTTTAATGATTATTTTAATGGTATTTT  
AAGCCACAGGCTTAGATTGCTCCTCAGTCTTGCCAGTTCTTACTTGTCTT  
TTATGTCTTACAAGCCTTGTTCTTCAAACCCCACTGGGCAGAGACAGAGC  
TTCCCCCTGCGAGCCATGCAGTGCCAAGCAAATCACTGGCCTTCAGTAAA  
TAATAATAGTGTGCAGGGCTGTGACAGGGAGGTGGAACTGGACCTTATC  
CGGCCCTCAGCTCCCCTGTGGTCTCAGGGCCCACTCATCTGGCAAATAC  
TTTGAAACTGAATGATCTCTGAGGGGGTATTAATCACTTTTATAATGAC  
TTCAATAACTATATGTATGTGGGTACGTATATCCACTCTAGTTACAGCTC  
AGGTACATTAAAAAGAAAAAAAAAAAAAATTTGAACCTCTGCTATGTGCC  
AATCACTTTGTTGGAGCATCCTGGGTTGAAAGATGATAATAGTACCAAAG  
AACATAGATATAAAGTTCCCTCCAGGACTGTTGCATTTATAGAGGTTAAGT  
GCATATCTGTGTATACAGCAGCTTTTAAAATGAAGTTGATATTTTGGTTT  
ATTTTATGTGAAAGAATACTGCGGAAACAAATTTCTCTGAAGAGATTT  
CCTTTTCCCATTTGCAACACTTCTTGAAATAAACAGATAACTTAGGGGCC  
CTTCAAGTTCTTAAACCATTGTGCCCTCCATCTTGTTTGTATTCTCGAT  
CTCCAATGACATCAAAATGACTTAATGGTATTTATAACTACAGAATCATT  
GGCACTACTAGTATTTGTTTATCACTGATTTGCGGGGGTAGAAGGAATAT  
GGGAGAAATTTTCATTCATTTTCTGGTGTGTGTGTGTGTGTGTGTGTGTG  
TGTGTGTGTGTGTTTAGAAAAAGTTCTGTTCAGAACCTCCTGAACAATAA  
GACTACTCTGCTCTGCACACAGAGTGATGACAAATGTGTGAGTGTGAGAG  
TGGATGCTTATGGAGGATTTATATGGACTCTTTTTTCTCCAGGTTTATGT  
GGTTAGTAGTAAAAGGTGACCTGATAGCTAAGGAAGTACCTTTAGCTACT  
ACTGGAGACCCCTACCCTACATTGACAGTCTCACTTTTTTGGGGATAAAG  
ATTATTCAAACTTTAAAGGAGATTCCTTCTCCTTCCCTTCCACCCTTTC  
CTGGGGTATGACCCCTGAACCACACTCCCCATCCTCACACTGACACCCTC  
TTGGTAATCCAGGTAAAAGTTTGTTTATGAGACCACATTTATTTTAAGTG  
GTTTTGATAGAAGTATAAAAAATGACTCAGAAATTGTTTTGGGTAATGAA  
ATTTGACTCTCTGGAAAGCCCCATGTATTCCCTTCTTAAAACATGCC  
CATAATGGTGATGACAATATACTGTGGCAATTAAAAAATCACCTGATGT  
CAAGCTTTTTCAAGTTCTCTCTTAACGTCTCAGGGATACTGCTTTGATG  
TTTTGCCCTCACTGTAGGCATCCTGCCCAGTGAAGCACACCATAAGAGTG  
GTATTTTTAAAGTTTTTTTTTAATAGTTATTGTTAAAAATATTTGAAGAGA  
CAAAAACTCTCATACATTATTGCTTAATATGATAACTTTTTCTTTTT  
ATATTGCCATCTATTCCCTTATCTTTGAATGTCTGCAGTGGTTGGAAAGA  
CATAATAATGGATCACTGGATTCAGCAGGGATTTGACAACTCCCTTTCCT  
CATTACTATTTCTTTTTTCCCTTCCACACAACCCAGTGAAGATTCCTGATA  
AGAACTACTACTTGGTTAGTTGAATTTTATCTTACATTATCCTTGCTTCT  
CCATTCACTTGTGGTGTAGATATACTTATCACCATTGCTTCTCCTCCTTG  
TTTCCTGTTCCCTCCTCCTTCTCCTCCCCCTTTCCCTTCTCCATCTTATCCT

CCTTCTCCGTCGTCCTTCTTCCACTTCTCTCTTGTCTTCCTGCTAAGTGTT  
CCCATGATTTTTTTTTTTAAAGATCAATTTGGTCATTTGAGAGTGAGAGAG  
AGAGAGCACACAGAGGGGAGGGCCAGAGAGAGAGAGAGAGAGTAAGACAGA  
GAGAATCTCAAGCAGACTCCCCTCACTGAATGAGGAGTCCAATGTGGGGC  
TTGATCCCAGGACACTGAGATCATGACCTGAGCTGAAGGCAGACACTTCA  
CCAACTGAGCCATCCAGGTGCCTCATCAACAATTATTTTAGATGCGCTTA  
TATTTGGAAGGCATTTTAGAAAACAACAGACAGGTAGATTCTAAATATGA  
GTCAGATATTCAGGAAATAAACTCTTTTGTGCAGAAAATAATCATGCCAA  
AAAAAAAAAAAAACCTGCTAGGAAATAATGTGTGAGATGATATAAGTTTTTC  
TGTGCATGTGCTGCAGAGGCATGGGGCAAAGGAGGTGCAAGTGACAAGAA  
GAAAGGAAAGGAAGGATGAGAGAATCACAAAGATATTGGCTTCCATTTCA  
CTAAAAATTTGGTTCTTATAACAATAAACTAAGCACAAATTAGCAATTAT  
GAAAGAAACCTTTGTACTTCAATAAAGAAAGATCATGCTTAGAAAAGATT  
TCTCCGTACTCTGAGAATATATTTTTTATTCTACCAATATTTGGGGTTCC  
TGGATGGAATTCATCCAGTACTGTTTTTCCTTGAGATGATCAATTGAAGT  
CTCGTTTTTAAAGACCAACAAAGGGGCGCCTGGGTGGCTCAGCGGTGTAG  
CATCTGTCTTTGTCTCAGGGTGTGATCCTGGGGTCTGGGGTTGGAGTCCA  
GCATCGGGCTCCCTGTGAGGAGTCTGCTTCTCCCTCTATGTCTCCGCCTC  
TCTCTCTGTGCCTCTCATGAATAAATAATCTTTAAAAAATAAATAAAAA  
GATAAAAGACCAGCAAAGATTTATGTTGCACATTTTCAGTTCTCAGACAA  
CATTCAGAGTTCAACAGGGAACCCATAAATGATGAAGAGAGGGATGAACA  
CTGATGAACTATGCTGACCCCTTCTACTTAGAATTGGTGTACTCACTTGGA  
TAAACCTCGTAAGTGTGCTCCTGCTGGTATAGGCTTTAAACATAAATATC  
ACAAAGACCTTGGCTAATTGTTGGTTTTTTTTTTTGTGTTGTTGTTGTT  
TGTTTTCACTTGTTTTTGGCCTATTGTAATATTCCAAGTCTTTGGCTCTA  
GCCCTTGACATCAGCCTCTGTAAAAATAACTCAGTTTTACTGCTCAGCCA  
AAGGTTCTTTATATAGCCCCAAAGTGTACCAGTGCTCTACTTATTTATGC  
GGCAAAGTTACTCCAAAGCTGGAGAGGCTTTGATCTTGTGTTGTCAAAAA  
GCCAGGGTCAGTAAAGTGATTTGTAAAAGGCTTCTCAGATCAGGTGTGAA  
CAGGCAAGAACATGGAGAGAAAGCAGTTGTAAAGACTTTCTGCTTTTCTG  
TTTACCTTTTCTTTTCTTTCTTTCTTTCTGTCTTTTAAAATGTGGGGA  
GTTTAAGGGATGGGCAGTTCTATTATGGATAGGTTGCAGAAACATTTAGC  
CTTTTCTCCTCACTTCTGCTTTTGTTTTTAGAAGAGAAAATTTTTTAAAGT  
TCCAGAAAATGATAATGACTGACCTGGGTGTAAGCAGTCATGTCCTTAAT  
AATCGAAGCATTTTGTAAAGTTAGGTGAAAAGGCAGTACCAAGGGGGCTGG  
TTTCGCGTGTAGAAAAGCAGACAGGTGAAGTTGATAATCTTAAGAACTC  
CATCACTACTTGAGCACTATACTTTAGTCAGTGATCATCACAGATGGGAC  
TTGATGTCAGACTGAACTTAGAATCTATCAGCTCCTAGGGGGCCATGATT  
CTCCCAAGCTAGCTTGTTATTCCAATGCTTATGCTACCATAATATTTTGA  
ACACTATTTAAATGTATATCTCAGAATGGTGGTGATCATGAAAATATTGCC  
TATTTAGAATGGAATAAAATAACCTAGAAGGGAACCGTAGTAAAGGACTC  
CTGAGTGGCTCAGTCGGTGAAGTGTCTGACTCTTGATCTCAGCTCAGGTC  
TTGATCTCAGGGCCATGAGTTGAAGCCCTATATTGGGCTGCATGCCAGGC  
ATGGAGCTTACTTTAAAAAATAGATAAATAAAAGAATCATAGTGAAACTG  
TCTCTGTTGAATAATAGTATTTTATGTTTCCAGAAGAAATGGTACCTCT  
CTAACTTTAAAAGAACGAAAAAAGTCATATCCACTAATATAATATGTCCC  
AGATTTCATTTTGAAACTTAATGAAAGCATGTTGGTTCAGGTTTCCTTGC  
AATGTAGTGTTACTTTTACCCACTACTGTGACGGATGGTGGTGACGCACC  
GCTCTGAAGAACTCATAGGTGATTATAATCTAATGGCCTCTGTTAATAT  
ACTCAGTAGATAAGCAGACTCATAAAGTGGCCTTGAACTGGAGGGCCTG  
GTAGAGTGGCCTCATGTACTTTATATCTTCTCTCACCTCATTTTCTAATT  
TTACAACCTGTACATCATAAATCTGACTTCTAGTTCCACGAGAGCATGC  
TCTGGAACACTGAGCTGAATCTCCAATGGAGATGTGATTGTGATAGACT  
AACATGAACCTGTTACATCTTCACCCAAGTGTTCTTTGCTTGAAAATTGTG  
TGGAAGCTAAAGCTTTAGGTTTTTGTAGCCACTGACAAATGCCAGGGAGA  
TATATTAGATGGTTCCTTCAGGTACTCACACAGCCTCTCAGGCCCATGTC  
AGAATTAATAAAAAAAAAAATTGTTTTTGCAGAAAATTCGTTTTTCTGGAAG  
CAGCCAAAGCACATGGTCCTCTGAGCCTTTAGTGAAGCAGTAATAACAGA

CCAGGCAGCCAGTCACTGCAGGAGACTCCAGAGGATGGAGGAAGAATTTA  
AAAAAAAAAAAAATCACACACACACACATACACACACATACACACAATTT  
TTGAACATGATTTCAGGTAAAGGGCTAAAGGTAACAATGTGTAGCTGTATA  
AAGAAATAAAAAGAAAGCTCAGGTAGGTGTTTTAGTATATGCACAAAAGA  
GTGGAGCAAACAATTCTGATTAATTTAGTGTGGCTGGCTTGATTCCTTAG  
TATCTGCAATTACCTATGATAACTAAGTAAAAACAACAAAAACAAAAACA  
GAAACAACCTCATTTTTGCTTCTATGTAGATAACTGAAAGAAAACATAAT  
ATTTTTTTCTCTTTCTTGAGCAAAGTACTTATTTCTCTACCTCTAAAGG  
CTTTGTTTTATTCTGCATTTGCTGACATAACTCTTTTACGTTCTTCATTA  
GCTAAGCATCAGCAGGAAGCTTCAGAAGAGCCCATTTTGTACCTCTTTT  
AACACTATTTCTGTTTCATATATGATCAGTGGGGGTTTAAGAATATGCCAG  
TAGCTAATATTAACAATAGGGACTTGAAACAATATTATGTTGGACTTTTT  
TCTTCTTATTTTTTTCTTCTGGTAGTTCATTGTTTATGTGCTGTTTCTCT  
AGGAGAAGTTTTACTTCTACACAGGCAGGAATTAATCTTTATTTTTCTTT  
GCCCTAATATAGTCAAGGCTCAAACTAGTAAGTCCTAGAATGATTTAGA  
GTGGAAAAAAATTAATGAATTAATGTCATTAAGGCTTTTAAAGCTTTGAA  
AATATCTCAAGGGACTTTACTGAATATATCACTTTGTTCCAAAAAATTCA  
TAAGGTAACAGTAGGGGATTGAAAGTGAAATATTTTAAAAATATGAGAAA  
GAAACATCAAGAGTATAGACCAGGAAGAGGTTTGTTGATTGATTGAAAA  
GGAAGGAAGGAAGAAAGTCCAAGCAAAAGAAAAGACTAAATAAAATAGAA  
TTGGATATCAGCCATATTTCTATTTCTGAATCATTTTAGGAGATACTTT  
TGTGGTATGTAGCATTACACCCATCTTCTTTTCTGTATGTTCTCTCTAG  
AGTAGCTCCTGTCCAGAGCAATATTGATATTTTGGGTGAGGTTAATAGTA  
AAGATATGACTTACACAATTTTTATGAAGTGAAATGGGGTCATTAAGCCT  
GCTCACATTTATCCAAGTTCTTCTCCTGTCTTGGCATATGATAAGATTGC  
ATGTACTTGCTCCTTCTGAATTTAAGCCATGAAATGGGAATGAATGTGAT  
GAGTATCACTTCTAGGCAGACGTTTTAAGAGCTAGGGCATGGTATGCCGT  
ATTTCTTACCCTGCCTGAATGGTCCTAGAAGTATATCTTGAGATGGAGC  
ATCCTTTAATCTATGTCTCTGTTAATGTTTGATGTGCAAATTCCTCTGAC  
AGCCATTTCTCTATAAACAATATGTAGAATGAGCAAAAAATACATTTTCA  
TTGTCATTTCCCTACCGAATGTTGGAGTTGTCTATTACTACAGAATAACT  
GAGTTTATCCTGACTTTATAGGCTGTTACATATATGATTCCCTCAACTGC  
TACCTTTCTCGCGTGTAAGAGGTTGGCCCATATTCTCATATCTGGGATGG  
TTCTGTATTTCTCATTTTACTGAGGTAAAGAAAATAGATTTTACATAATT  
GGCTGACAAGCTGGGGAAAAATAGGTATCTTTTTTTTTTAACTTAGAATAT  
AAACAACTTCTTTAAATAGCACACACATGCTTGCTTTGCAGCTTCATCCA  
TCTATTGCCTTAGTCTCTTCCATCCACCTACTAGAGTTAGTCTGAAGAAC  
AGAGATGCCCTCCTGGATTATGTTTAAATAAGAATGGAACAAGTGTTTG  
ACCTTAGAGAAGCTCAGTTATATTTAGTATATATCGCCAGGGCCATTTGA  
CTCTTTGGCCACCTTAGTGGGTTTTTAATTACTGCTTCTTGACTTCAG  
TGACTTGACTATAAAGATTCTCCTCTGATATCTTGAAGTGGAGTCTATGT  
ATGCAAGAATATTCACTCTCTGGGAGCTTTTCACAGATTGGTTTTTCCA  
AAGAGGATTTTTATCTTTGTTTTTTATTTTGTGTGCTGTTTGATTTTCT  
AGCATAGTTTCATTAGAGATGCTCTTATTCTCTCTCTCAGATCAGAACA  
TGATATATGTACAGCTGGGGGTGGAAGAAACAAAAGCAGAGCACATTTT  
CATCTGATGTATATTTGCTTATGGAGATACACAGTACTAGGCTTTAATCC  
CTAGAATTGACCATTGGAATGATTAATATTTGTAATCTTATAAGTGGGT  
AGAAAAGGAGTTAAATCACACTTTATAAATCATGGAACCAATTAAGTAT  
GTGTGTGTGTGAGAGGTGAGGATAACTTCACCAAGAGTAGGTGTTTTCAT  
TATTTTCTTTTCTCTCTTTTTCAGAAATTAATGTAGGAGTAGACAAGAT  
TGAATCTCTTTGTTTCCAATTTATCTTCTATTAAAATTGCTGGTGCTAAA  
GTTTCTCCCAAGTTAACCTATGTTAACTTTTTTTTGGGGTGGACATCTAT  
TTTTCGTAACATAAGGTGGAAGAATAGTTTGTTCAGATGTGGTTCCTTTC  
TCAGTGAGATAATACAACAGAGGCACCTAACATGCTTCCCAGATCGAGTA  
CATCACTGCTGTATTTCTGTGTGAGTGCAACATTTTTTTAGGTATCATGTG  
CACCAAAGCACAGAGTTTGAGATTATGTGAGACAATAGCAAAGATCATAG  
CTCCTATCATAAGAGAACCTAGATGCATCAGGATTCTGAATTGTGAAAGG  
AATAAACTCGGCCTTGGTTTTAATTTGAATTGACTCAGAATTTCAAAGG

AATCTGAACTTCAGTTCTGCATTTGAAAAAGATGGAGCCAGTGATGCCT  
TTTCTATTTTACATGTGTTCCATAAACCATAAAATGTAGCACAATCCTTC  
CAAAACCCTTAATTACAAACATATATAAGATTAATGTGGGAATGATGAGC  
AAGATGTGTTAGAAAAGGGGACTGTATGGAAGCAGTATGATAAATTCAAA  
GGCTGCCAGAGAAGTTCAAAGATGAGATGCTAAGGTGCTATTTGGGGGT  
GGCTGAATGGGAATGGAAAGGAATAGACAAGTGTGGAGACACTATGATGA  
TTCCATAATTCTGGAGACTGGATAGAAAAGTTAAAGAGTGAATTAAACAA  
TTAAAGTCTGAATGGCTACAAGTACTGTCTTTTTTTTTTTTAAAGATTTT  
ATTTATTTTATTCATCAGAGATTGAGAGAGAGACACACACAGGCAGAGGGA  
GAAGCAGGCTCCATGGAGGGAACCTGGCATGGGACTCGATCCTAGGTATC  
CAGGATCACATCCTGGGCTGAAGGCGGCACTAAACCACTGAGCCACCAGG  
GCTGCTCCTGAATGGCCACAAGTACTGTCTTAAGATGATCAGTGACCTGG  
CTCAGGAGCCAGTGCTCCTGGGGTGATAGTGGTGGTAGCAATGAGTTTAA  
TGTTAGAAATATTGCATTTAGGTAATGGAAGTTTAGCCAGATTTAATGTC  
TTTGTGATACAATTGAAAACTGCAAAGGAGCTCAGGAGAGAAGTCCAT  
ATGAGTAATTAATTTAGAGCAATAAATGAATTTTGAGAGGGAGGAAGAAA  
ATGCCCAAGAATGTAATGTCTGTATTTGCAGGATGTATTTATCAGAGAT  
GCATTATAAATATTTTGGAAAACTGCAAGAGAATACAATGAGCAAGATAC  
TCCCATGTAATTTAAAGCTTGTATGGTATGGGTAATATTTGGGTAAAAAC  
ATGTTACTCAATTGGACGCATTACAAAGTAGAGATGTATAAATTAATATT  
AAATTAGGAAATGGAATCAGCAAACAAAATATTCACCACCATCACTCTT  
CACCCAAATAAAACCAGGCTCAGACAGTTTTGTAGACAAATTTTACCACA  
TTTTAAGGAACTAGTTATTTGTAGCTTATGTACCTTTTCTATGGACAATG  
GAAACAAAAGAAAATCTATACATTTAAGAACTATAAAACAAAGGAAAACC  
TGTTAATTTCAAAGATCCTTTCAAGGATCTTTGTTAGCATCCTTGTGTTT  
AACATTGAACCACTGTCTAAAGTGAAGTAATAGATTTGAAAATAAAAGGC  
ATAAGGATTACAGTAGCTGTFTTCAATATAATTGTTTATTCGAAAAAAT  
CCAGGGACTCAATAAACTGTTAGAATGTATAAAATTCAGTAAGGTTGCC  
AGGTAAATGCTCAACAAAAATAAATTTTAGCATTTTATAGATATCTGCAA  
TAAACAATTAGAAAATAGTGCATAATGTATCTAGATATAAATGTAGCAAA  
ATATGTGTTAAGCAAATAACAAAATATGCCATGTTTCATGAGTGGGAATAC  
TCAGCAACATAATAAAAGGGTGGCTTTTCTTTCAATTAACACTACTAAATTG  
ATTGCAATTCCAATAAAATACCAATATAATTTATTTTGAACTTGACAA  
GTAGTTCCTAGAATTCATATGAAATACCAAAGAGCCAAAAATAGCAAGCA  
CAGTTTTGGAAAAAAGAATAAGAAAATGAAAGCACCCAATAGATACCAAG  
ACATTTCTAACATTACAGTAATTAAGGCTAGTCAATATTTGCACTTGAGT  
AAAAC TAGTGAAGCACAAATAGGGGGTCCAGAAAAAGATCCAACATATGTG  
TGGAAATTTGATGTGTACAGAGGTGGCATTAAATTTGGTTGGTGAAGAA  
AATAAGTAAGTGGTGCTAGGTTGATTGATCTGGGAAAAAATAGGTATACC  
TAACACAATACAAGAATCACTTCCAGATAGATTTAGCATTTGTACATGTA  
AAAGAAACAAACAAACAAACAAATGAAAAGGGAATATCCATAATTTTCAG  
GTTAGAATTCCTTTTTTTTATGACATTTTTTAAAATTTTATTTATTTATG  
ATAGTCATAGAGAGAGAGAGAGAGAGAGAGAGAGAGGCAGAGACACAGGCAGAG  
GGAGAAGCAGGCTCCATGCACCGGGAGCCCGACGTGGGATTCAATCCCGG  
GTCTTCAGTATCGCGCCCTGGGCCAAAGGCAGGCGCCAAACCGCTGTGCC  
ACCCAGAGATCCCCTGGGTTAGAATTTCTTAAACAAGAAAAAACCTTCATA  
ATTTTAAACATTAATAAATATGATTATTTTAAATATAAAACATAATTTTC  
AAGAAAAGGTACTATCAAGAACATGAAAAGAAAATCCATACAATTTGAAG  
TTATAAATAGCAATGAATTAATATCCAGAATGTATAAATAACCACAAATC  
AGTAAGAAAAAAGAAAAATGATCCAATAGTACAATGAGATTGTAAATAAGA  
AATTCAGCGAAGAAGAACCCAATAGTCTTCTTAACATAATCCACCAGTAA  
TCAGAGAATTGAGAATTGAAAATACAAGATCCTTTTCATATTCATCAGAT  
GGTCAACGATTAAGAAGTCTTGACAAAAATCAAATATTGGCAAAGAGGAA  
GACTAACAAATTCATCCACCAACAATGCAATTATAAATTTGGTACACTTTG  
TAGGGCAAAGTAGCAATAATTAGTGAAGCTCATGATCCACATATACTGTA  
TGACTCAGAAATGCCACTTGTATGTATAATTAGGAGAAAAATCATGCATAA  
ATAAAGAAGTAAGTTCTGGGGATCTAAAATATAGCATAGTGACTATACTC  
GATGCTCTATTATATACTTGAAAATTGCTAAGAAAGAGGTCTATGTTTCC

TCACCTCAAGAGTACAAATACTAACTATGTGAAAAGTGATAAATGTATTA  
ATTAACCTGGTGGTGGCTAATCATTTTACAATGTGTATGTACATTAATA  
TCATATTGTACACTCTAAAAATCATGTTGTTCAATCTCGAACAATTTT  
TTTGTTAATCATACCTCAATAAAGCTGGGAAAAAGCTTTGAAAAATTAT  
TAATAATAAAAAATTCAGAAAAACATAAACATATCAATAAATAGAATA  
CAAATAAGTTGTGGAATATTTATAAACATCATAGAACATACAATAAATT  
TAACCAGAGCTACATCTATCAATCTCGGTTAATCCCCAAAATGTAAAGCA  
GAAGGATGTATACTTTTTTATAGCATTGAACCACAGAACACTGCAATATG  
TATTCATTCTCTGTGTAATCATAAATTATCACAAGTTTAGTGACTTAAAA  
CAACACAGTTAATTAGTTTTGACATCAGAAGTCCGATGTAGGTCCCCAG  
GAACTACAGTCAAGGTATTGGCAAACGTGTGTTCTTTCTGGAAGCTCCAG  
TGGAGATTCTATTACCTGCTCATGTAGCTTGTTAACAGGGTTCTGTCCC  
TCGCTCAGGTCTCTCTCTTGAGATTAGCTGTAACTGAGGGTGATTCTTA  
GCATCTAGATGACACTTCCTTCCTTGGTTCTGTCCCCCTTCTTCAAATCCC  
ATTCTCCATATTCAAGGACAACAGTGACAATGTCTTTGAATCTTGCATC  
TCTCTGATCCAGTCTTCTGTCTTCCTCTTCTACTTTGAATGGCTCATGTT  
ATTGGATTGGACCAACTCATACAATCTGTGATAATCCCCCACTTCAAGG  
TCTTTACCCTTAATCACATCTACTAAATCCTTAATTTAATCACATTTGT  
GAAGTTCCTTTTACAGTGTAAGATAAGGTAGTCAGAGGTCCTGAGGACTG  
GGACATGGATGTCTTGGGAAATGGTTTTTCTCCATACCATACTATATATA  
TTTTTCATAAACAAATATATGTGTATTGAAATTACAAAAACATGCTGAGA  
AAATTGGTACTAAGTTGAGAATGCATACTAGTTACCTCTACGTGGAGAAA  
AAGGAGAACTGGATTAGGAAAAAGTTCTCAGCCTAATTTTCTCTACTT  
TTAATATTTAAAAAAATAGATTTGAACTGAAATGCTAGAGTTTCATT  
AAGTTAAGTGAAAGTGAGGGCAAGAAGAGAGGGCATAGGTTGTTTTTTT  
TAATCTAACATTTATATTTATCAGTCCATTTGGAATTTTGTAAATATAAA  
ATGTTTAAAGGGAGAGGAACAAAAGAAAAGAAAAGTTTGCTTGAAGA  
GTCCGTGAAATATTGAATCAGTGAAGTGGATATTGTGATGGTTGAAAATA  
GGGGACACTGAGATGTGTAGGCCAGAACTGGCACCTTGGTCAAGTAGAA  
GAGGAGTTTTGAGCTGTGAGTAATGAAGAGATAAGATTAAGTATTTAAC  
AAATATGGAAAACTCCCAGTAATCATGATGAGCATGCTAGAGAGTGATG  
TTGAATGAATAAACCAAGCTACTCAAGTAGATGATCACCTGGAGAAACAG  
CTGATCAGACATTTAAAAACACAGGAAGTTTAGAACAGTCACTACGAAAA  
TGTAATGGGAGAAGGATGAAGGAATAGACAAGGATCCACTAACTGGGCT  
TACTCACATTTGGCAGTGTACTTGATCGTTGTTTCTCGATTTTTCTTAATA  
TTCTTTGGAAGCCTGCTAGCTTAAACACGGGAAAACAGGGCTTGTTGAAG  
TGAGAATTTGCATCAAAGAAAAACAAAGAGGTAATGAATTCTAGAAATGC  
TAGAGAAGAGAGCATCAAAAGAGGTAACCATGGATTTTCAAGCTAGGAAAG  
GAGTTAAAATTTAAAGCCAGGATCTGAGGAAGAGAGAGTTGGTTCAGG  
AGAATCAGATGAGCCTGGACCTGAGGTCTTAAAGGATAGAGAAGAAGTC  
AAGTAGTTTTATCAGGTGTGGAGAATCGATTAGCAAAGTGGTAGTAATGC  
TATATAATCTGAAAAGAAAAGCTCCAACTTTGTGATCGAACATGAAGCAA  
AGATAAATTTAATAACTTTTTAATTGAGGTATAGTTGATATAGAATATTG  
TATTAGTTTCAGGTGTATAAGATAGTAGATTAGAGATTATATCCAATATG  
GAATGCTCACCACAAGACATGTAGTTACCATCAAAACAAATGAACCGAAG  
ATAACTTTTGACAAAATGTACCATAAAGCTTAGTTAGGTGAACAATATTG  
TTCAGGCACCAGCAAGACACTGGAGGAGTGCCAATTTTTTAAAGGACTACT  
GCACATTTCTTAAAGCATTTTCCACTGAGATTTTATCCATCCCTTCAAACC  
CTTTGAGAGTGTTGTCTTTTTCACTTACTTCTGTCTCTCCCATGGTTCATT  
CTGATCATATAACCCTCTTATAATCTATAGCCAAAGCCTTTTCAAGTGGGG  
AGGTTATAAAAAATGGTGTTTCAGAAATTTAAATCAAAGATTTTAGGATTTTA  
CCTGGTGTTTTATTTATTTTTTTTTATTTTTATTTTTATTTTTT  
TTACCTGGTGTTTTTAAAGTCACTTGTACAATAACGCCCTAGAGGCAGAAAT  
CAGACTAGAATCAAGGTCTTCTAATTGTAGCCTGGTGCTTCTCTGGTG  
TTCCCTACTGTCTCTCTCTCTCTCTCTCTTTTTTTTTTTTTTTTTTAAAT  
AAAGGAGCCACCGGGATCATTTAACAGTTGAGTAAAAGAGAGTTAGAGTG  
AGCCTGTAATTCAGTGTTCCTTCCTTGAATGGAGCTAGAAATCCTGATG  
TGATCCTTTTTTATATAGTGTTTAAAATGGATACTACAAGCCATGGCCAGC

AAAATGAAGGTACATTTTCCTGTTGGTCCAAGAGGGCATTATGGGAGGGAA  
TGACACCATTAACTGGTGGTTTATTGCTTCGGGGAAATATTTGGACATCC  
TGTTTGCTTGATCAGCAGTTAAACCCCGGGTTGCTGTTTTGACCTTGGTT  
CACCCAGAAGATTATTTCTATAAACTTGAAAAGTCAAAGCTTTTGTGTCT  
ACATACACAAAAGAAGTTCAAGGGAAGAAAGTCAAAGCTTTTGTGTCT  
CTGGGGTGTGAATGCTGGCCAAAGACTATACTACTGTTCTCTCTCTGGAA  
ACAAGGTGATTTGCATTTCTCCTGGGTTTTAGCTCCTGATTAAGTATGTA  
AATAACTTTTATTAGCAAAAGCCTCGTTTTCTCCCTCTTGGATTTTGACC  
TCTGGAGCTCTGTACCCATGTTTGTGGGAATTAAATTATGAACATTAAAT  
ATCAGAAAGTTTGGGGAAAAAATGTGAAGGTCTAGTGGAAAATGTCATATT  
AAAGTATAAGAGGTCTACAATAAACATATTTTTATTAACTTATGTTTC  
CCAGTTGCTACACATAATTATCTTCCCTACTTGATAAAATAACAGTATGAAA  
CACTTTAGAACTAACTCCCCACAGCTCCCAGCACATAAAATATGAATGAT  
AAGAGCTATTAGCAAACACTTCTCGCCAGATTCATGTGTTGCAGTTAGAC  
CAGACCCCTACCTGAGAATATCTAAGTCAAAGAGGAACCATTTCTCTTG  
GTAAGGATCTTTATAGTTTGTAAAGCCCTTGAACATACTATCTTGTGTGT  
TTGTTTTTATGCCTTGCTTTTCCAAATACCATTGCGAGTTAATTAGTGCT  
ACTATTACTCCCTGCATTACTCCCATGAAGAAAATAAGGTTACAAATTTG  
GCCACAAATAACCAGTATTCTGACTTTTATAGCAAGAACTTCCTTCTATC  
TTCTTTGCTATAAAAGTCAGGATAACAGTTATTTATGGAGATGGAGGACT  
TTTGAATGGGATAGAACATAGAGAGGCTTCCTGGGATGACTCTTAACAAG  
GATGTTGACTTAAATCACTCATTAGCAATATATATTTTGTATGACTT  
TGCATATTTGCATGTTACTGTAAAACCTAAAAACATAATCGAACTAGAAA  
GAAAGAAAGAAAGAAAGAAAGAAAGAAAGAAAGAAAGAAAGAGAACT  
GGCCAAAGTTATTCAAAGCTAGTAAGTGAACATCTGGTGTGGATTCAAG  
TGTTGCGACTCCAAGGTTAGTGTTTTCTCTTTAAATTAATGCAGGAGG  
ATTCTGATAACCACGAGTGGCTTCATTCCCTGGGAGTATTTCTAGCTGGC  
CTAGTCAAAGCTGTAAGTATATCAACAAGTGCACCACAGTCTGATGTAT  
GGAATCGTATGGACACAATGCCTACCAGAGATTTGTGACTTGTACCAAG  
GGCATTATCTCATTTCCAAGATATTCAGGGAAGCTTCCAAAAAAGGAAAA  
TAATTTTAGATATTTTTTAAATCACTCAGTTCTAAGCAAAAAACAAAGAA  
CAGAGTTTTACAAAGGCACAGGAAATGTACTGTTAATTAACATCTGCCAA  
AATTTTCTTGGGTGTTAAAGAAAAACAAAGGAAGACAAAAATAATGAAAA  
TAATAGAATAATGAAGCAAAAAAGAAAAAAGCAGTATTAGCGTATCA  
GAGTCAGCCCACCATAAAAGAAAAATAATAAGTGGCAAAGAACTACCGA  
GTTTTCAGGTCCCTAGGTTTCTTTTACATCAGTAAAGCTTGGCTAAAATA  
ACACACACCCTATAGCTTACTAATTTTTTACAGCCAATATTTGGGTATAAT  
TTGTGTGCTTTATAGGCCTGGAAAACCCAGGAGAGGCCACAAATTGCTGA  
CGTAAGTGTCTTTGAATTTGACAAAGCCCATTACATGTCAGTGAGGAGGA  
TGGGTGGAAAGCTTAAGGGGGTGGATTTTCTAGGCACCCAGAGGGGCTTT  
TCACTGCAGCTACTGAAATGCTAATAAACTCCCTAGATTTTGGCACTGA  
CCAGAGTAGTTTTAACAGTTCATTCTAATCGCAGATAATTCTTTTTTTA  
TTATGTTATTTTAGATGCTGTTATTACACACATAGCACATGTTGCTATGT  
TACTGAAAAACCATAAACTGTACACATCATACCAATCCTAACAAAAGTGA  
AATTGTCTATAATCTTGAGTTTAAAGGTGTGTGTGTGTGTGTGTGTGTCT  
GTGTGTGTGTCTGTGTTTCAATCTGCCCACCATTTCATTTAGGATAGATT  
TTATGATGTCTGGAATCTGAACTGAATTTTTTGTCTCTTCTTGTTCAT  
TAAAAGAAATTAAGAGCTTACTCATTCTCTTTCCAATAAATTTTATGATA  
AATTCTGGGTGTAGGGATATCTCAAGCAATCACATTTTCATACATTTTCTA  
GTCTTAAAGATTAAACTACATAGTGAGTACGACAGGAGAGTGACAATA  
TATTGTTTTTTTTCTAGGCCAGGCAACTATACTTGATTCTTTTCAAGTGA  
CACAAGCTGCCCTTGGTAATTTCTGAGTGATTTTTAGCCTAAAATAATAC  
GCTTAATTTAACTTCAAGAGGCAAAACAGATTCTTAGACAAAACATATTC  
CCTCACTTTCTCTCTCTCTTTTAAATTTGTTTGTATTATTTGCTTAAATT  
CTTAGGGAGTTGTCATTTATATTTTTAATTTTTTATTTTGAAATAATTTAA  
GCTCATAGAAAAATTTTAAAGAGAAAAAATCCTATGTGCTTTTAACTCAAG  
TACATCAGTTGTTAACATTTTATCACATATGCTTCATCTCTATCTAATTT  
TAATTTTTTTTAGCCATTTGAGAGTGAGCTACACAAATTTCTGCTCCTTTAC

CTCTAAATTTTTTCAGTGTGAATTTCTTAAGAAAAAGGACATTCAGTTTCA  
TACTTAAAGAACAGTGACTAAAGTCAACTTTTTTTTTTAACTATTGATAT  
TGTCTACATAGTTTGTTCACATTTTATTTATTACCCAGTAAAGTCCTCAT  
AGTAATTTTTTCTAGTCCTGGATCCAGTCCAGGGCTGCATATTTCAATCT  
GTTCTTCTGTGGGAAGAACCCAACCTTAATAGCTTTAATCTGCAGGCTTA  
CAGACAAGGGTGAAAAATGACAAGACATTGGACAAGGAAAGATGGAGTT  
AGGAGCTAAACAAATTGTCTAAATAAATATCAAACCAAAGGAATTAGACA  
AGATATTAGAATGAAGATATAAGCATGTATTAGCATGTAGAGAAAATCAC  
CAGACAGTGCTATTTGTTTTTTTACAAAAACACGTAATATTATGCATAT  
TATGATTTTTAATTTTATAAATATCTGAGTTTTATGCATATAAAAGCCCAA  
AAACCCAATTATATACTCAAAAAATTTTAACAACGGTTATTTTTGGCATTG  
GCCTTATGAATAATAAGTTAATTGAATGTTCTTTCTCATCTGAAAGTTTT  
ACAATATCTTTATCTTCTTAAAAATTTTACAATAAATAATATGTTTACCTT  
TACTATTAAAAAGTTATTTTTGTATACAGAGAGGCAGATAGATGGATATAG  
ATACAGCTAAATCTCAAATAAGAACAAGAATCACAGTGATGGAAGCTGGG  
TTGGAGAGAGCAGGCCTGTGACTGGTAAAAGCTCAGAAGAAATAGCTGGG  
ACAAGTTGGCTTCTGGTGAGATTTCTAGAGGGCCTAGGGTCTGTGGACAA  
ACGGGTGGGATTGGAGAGAGCTACTGGGGACGCCAAAACAGAGAGAATGG  
AGTCACTTCTCTAATGTGATGGTAAGTTAGCCCGTTTATACTTCCTAGTA  
ACTATGTAGGACGTCCGTGAGCTATTTTCATAACATATAGTATGGTAAAC  
TTGAGGGCCAGGGGGATCTAAAGATGATCATCTACAAGTATTCACCAGTG  
ATGGTTGCAAACACTAAAATCTCACCTTTAACCACACTACCTAATACAAT  
GTTATATTGCATAGAGATCCCCTTGGGGTGTGTTAGGATTTCTGAACA  
CATATGTAAGGATCAGATTTGGCAATTAGGGTTTTATGGATGGATTTTTT  
CTTTGTTGGGTAAATGTATATATTATATGTCTCATCATGGCCAAATGGCC  
ATTTTTTAGGACTACAAAATCACAGTGCTAGAAAATGAAAATGAACAGGAA  
AAGAATCTTTCTTTTAAATTTAATTTAATTTAATTAATTTATGATTTTTT  
TTTTTTTTTTTTTGTAATTGCAAGACCTAGTGAGGGTGCCTCCTTAGCCG  
CACTCCTGGTGACATTAGCTGCCAAATGACAACATCAAAATTGTACACAT  
TCCTCCACATAATTTCCAGGTGCTTACCAGCCTTGAGAAAGTGAATGTAG  
GTTTTCCAAATAGTTTCTGTCTGAAAGCTAGGTACTGCAGAATGTTGGTT  
TTCTGGCATTTCCATTCTGTGATGTGAATTTTAAATTCTCAGCGGCAAGA  
CCTTAGCTGAGCATGTTTTACGGGATGACAGATACAGGTAGTAGAGTGAT  
GGGTAGGACTATGGTGCTATAGTAATAATGATATGGGAATTATCAAGGTG  
ATTATTGATGCATCAGTGAATCTCAGAACTTTATAAGGAATTTATCAGCA  
CGTCTGGGGTGAGTTTCTTACACTCTACTTTCTCTGTACTCTACATGAA  
GCCCTTTGCTGCTGTGAAGGATATTAAGCATTGTGGGTAGAAGATAAGAA  
ATGAAGTGAAGACCTCCTAAATCCTGTCCCCAAATTCCTCCCAGGCTTC  
TGATTCCGAGAACAGTTGTCTACTAAGTGACCCTCATCATGCTTTTTTG  
TTGGCTGAATGAGAAAGAGATTCTTAGTTTCAGAATTGTAAAGAACCGGG  
GAAGACTGACACAGAAATGGGTGGAGTGCGATGAGATGCCATCTCACTCC  
TGTCAGAATGGTTAAAGTTAACAATGCAAGAACTACAGGTGTGGGACAC  
CTGGGTGGCTCAGTGGTTGAGCATCTGCCTTTGGCTCAGGTCATGATCCC  
AGGGTCCTGGGATCGAGTCCCACATCAGGCTCCCCAGAGGGAGCCTGCTT  
ACCTCTCTGCCTATGTCTCTACCTCTCTTTCTGTGTCTCTTATGAATAAA  
TAAAATCTTAAAAAAGAAAAAGAAACAACAGGTATTGGTGAGAATGTGG  
AGGAAGGGGAACCCCTCTTGCAAGTTTAAATGGAATGTAAACTGGTGCAGC  
CTCTATGAAGGTTCTCAGAAAGTTAAATGGAATGGAATGGAATGGAATGGA  
GCAATCCCACTACTAGGTATTTACCCAAAGGATACAAAAATACAGATTCTG  
AAGAGTGATGTATCTTAATTTTATAGCAGCCTTATCAACAGTAGCCAG  
AACTAAGGAAAGAGCCCAATGTCCATTGACTGGTGAATGAACAAAGAAG  
ATGTGACATATATATATATACACACAATGGAATATTATTAGCCATCAAA  
AGGATGAAAGCTTGCCATCTGCAAGGCTGGATGGAGCTAAAGTGTATTAT  
GCTAAGCAAGATAAGTCAGAGAAAGACAAATACCATATGATTTCACTCAT  
GTGGAATTAAGAAACAAAACAGATGAACATATGGGAGAAGGGGGAAAGA  
GACAGAGAGAGAGAGGGGAAAAAAGTGTAGGAGACTCTTAACAATAGAGA  
ATAAACTGAGGGTTGATGATGGGAGGTGGGTGGGAATGAGCTGGATGGG  
TGATGGGGATTAAGTAGGGCACTTGTAATGATGAACACTGGGTATTGTAT

GTAAGTGATTCTACTCATGAAATCAATATTGCACTGTATGTAACTAACT  
AGAATCTAAGTAAAATTTTGGAAGAAAAAGAAATAGGGTGGAGTGGAAA  
GGTGGAAAGCCTCAGCCTTTAAGAATCTAATAGTATAATCTGGCTGGAATT  
TGGCAATTGGGGATGCTTCATTTACAATTTTAAGTTTCTAGCAACATAAT  
ATTTCCCTTTCTTTTTTGTACCTACTAGGTCTCGAATGTCTACTATATGC  
CAGACACAATTCTTTTAACAACCTTTTAAAAAGTACTATTATTCTTGCCTT  
ACATATGAAGAGACTGGTGCTCAAATTTAAGTGGTTTGTTCAGATCATG  
TAGCTAGTAGATGAAAGATATGCTTTAAAGCCATGTCTATGTGACCTTAA  
GTTCCATGTTCTTTTCCTTAAACAGATTGCTATTTAATCTACCACTAATT  
TCCTTTCATGTTTGCTTGCTTAAAATGAATTTAATATTTCCCATTAATTA  
AATAGGTGCCTGTCAACCTATGTGAATGACCAAGAAAGTAAAGTTTTTCT  
TTGGCATATCTGACTTATATAAAATCCCCTTCTTCTATTTCTGCCACACA  
GTCCCTCAAATGTCCAACTCTCCAGCACATTCCATCCTTTGCACCATCTT  
GTTTTCTTAGGCAGATGGAATAGATGCTAGAGCTCTTCAATTTCCCTTGT  
GTTTCTTCCCAATGAATGTATCTTCTTGTCTATCTCATCCTTACATATG  
TTGATAATCTCATTTATGCTAATAAAGTGAGCTAATGTATTATAGCTTTC  
ATTGTATTATATTTATATACATATATATGTATATAAAATTTACATATACC  
TAAAAGTTTCCATAGTGATAAAAATCTAAAATTTCCATGAGATGATGTTA  
ATAGTGGAATTTGAGCCCCATAGCAGGCTGTGGAAATATTACAGCGTT  
GATGTGTATACTCTGAATTCATAATACATCAGAGTTGCCCTTCCCTCCAC  
CTCTACAATTGCCATGGTCAACAGTTTCTATTAACCTTCTCATTCGTATAA  
GTTATAACTGAGTCCATTCTATACAGAGGCAATAATATCTTTCCAGTCAA  
CTAACTTTTTTTCCTGAGCATATAATTGATTATACGCACAGACACCTAATT  
TCACTTTGCCTTAGTACTTTTCATCTGTAAAATAAGAAATTTAGACTTAAT  
AATCCCAAAGTTTTCCTTCCCTAGTATATAATTCTATGAAAAGAACATTTTC  
ATGAAATAAATATAATCTGTACATTTCTGATGAATTTCAAGTTAGCTCAT  
CAAAATGTTTTGTAGAAAGCTATTTGATACTGTTGGGGCCCTACAAGTAC  
TTCTTAAACACCATTTTCTTGCTTCTGTGCATCAGGAAATAACACTCTG  
CCAAGTGTAAGGAACCTGACCTCCAAAAGGGGCTGAGATTGTGTAGT  
CTCAAAGCTCAGATGGATGTGACTTGGCCAAATGTGTTATCCCCTCTCTG  
CTCTGTTATGCTGCCAGCTGGTGGGGTTAGTTTAGTTTACCATTTAAAG  
TTTCTTTTGGACTAATGAATATTTCTAAAATATTGTATTGCTTGAGAGC  
TCATGCTATCGCCATGTAAATCAATTCCCACCTCTATTATATAAGTATGT  
GATTTTTACCCCTACAAAAATTCATTGAGATATTATAGGTCTTATATTG  
GCTAATAATAGACTATGGTGGTGGTCTGGTGGAAACAACTATGGGTGGGA  
TTTGGGGGAGAGAAATTGTCATCACACAGCTGCAAAGTTCATAGAAAAG  
CTGGAAGCTGCTGTTTCAGCTGCGGATGGACCATTTGGCTCCATCTAACCC  
ATGGAATCATAAGGTAAAGTCACAGTTCCTTTAGCTTCTCTCAGAGGAT  
AACTCTTAAGGTAGCATCTCTTGGGAATAAAAAGGCCAGAAAGTGAAAAA  
GACCAGAAGCTTATCCATAAAAGAGGCCTCAGAAAGTGGGAAGTTGTCGG  
GACAAGGCTAAGAACTGAGGAACCATGGCCTCTAGCTTCTATGATAATT  
AAGAGTTTACTGGTCTGTGTGCATACTGTGTGCCTTAATAAGCAGTAAA  
AGAATGTGCCTGTCTGCAATAATCATTTTATAAATATTAATGCAGCTTTG  
AGAAATTGGGACCTGATTTTAAGTGTACATTTTATTTGTAAGTGCACAG  
TTTAATTACAATCATAAAACATTGATTAGTTAATATTTGCTGCTGTTTTG  
TGACTTGGGAGCCAGACAGGTTTGTAATCAAAGCAGTGTGAGATGTGTG  
CCGTATTTAAGGCAGAGAAACAAGCTGGGGGATGGTCAACTGAAGGATCA  
TCTGAATGTTTATGGGAATATTTCTTGGAGTTGAACATAGATTTAAGTTG  
AACATGAATCCAGTGCAGCTGGTTTACACTAGGTGTGCAAGCTTGACCTG  
CTTTTGGAGTGTGTTGCCATCATTTGGGGAGTATAAGCATTTTCTCTAT  
GAAAGAATTTGGAATAGCCAAAGTATTGATGAAACCTGCATGTTATTTGA  
AAGGATGCTATGGACTGAATTGTTTTCCCCCTAAATTCATACATTGAAG  
CCCTAACTCCAAATGAATTTGGGGAAAAGGCTTTTAAGAGGTAATTAGG  
GGGGATCCCCTGGGTGACGCAGCGTTTGGCGCCTGCCTTTGGCCCAGGGC  
GCGATCCTGGAGACCCAGGATCGGGTCCCATATCAGGCTCCCAGTGCATG  
GAGCCTGCTTCTCCCTCTGCCTGTGTCTCTGCCTCTCTCTCTCTCTCT  
CTGTGACTATCATACATAAAATAAATAAATAAATAAATAAATAAATAAAGAGG  
CATTAGGGTCAAATGAAGTCACAAAGAGGGATTCCAATGTAGGACAAGTG

GCCTTATAGGAAGAAGAATCATCTCTTTTCTCATGCATGCACCAAGGAAA  
GGCCATGTGAGGACATGGTGAGAAGATAGCAGTCTGCAGCTCAACAGAGG  
GACCTACCAGACACAGAGCCTCCTGCCACCTTAATCTTGGACTTCCCAGC  
CTCCAGGACTACAAGAAAATACATTAGAAGTGTTTAAGCACCCCTAGTGTG  
TGGTATTTTTATTCTGACCACTCCAGCGGAGTAAGACAAAGTCGTTTCGTGG  
GAGATGAGTGGAAAATAATTAGAGGTAAAGCAAAGCTATCTGATCATAGC  
AGGTGTGATGCTAGGGCATGAGCCACAGTAGAATGGGGTTAGCTAGAGGG  
ACCGGGGTTTGGAGATGTGTTAAGCCAGAATTTGATCGATGCTAAGATAA  
ATCCAGGAAGTCAAGAAACTAAAAAAGATAAAGCTGAGAAAGGGGGATG  
TGGACATGATTCTAGAGAAACAAGAAGGACCCAAAGATGAGACAATGGTA  
GACTCTGTAAGTAAAGCATTAGGGAGCAAGCTTGATGAATTGTAACCCCC  
AAACCTTTTTTATCTCTGCCTGATGATTTTTCTTCAGTGGATGTGGATAAAA  
TGAGGCTGTAGGAACTCAGTGCATTCAGAGTTCAGTGGTTGTAAAAGTCT  
TTGCTTCTGATAGTGAGAGCAACAAAGATGCTGGTGTGGAAACGATGTA  
ATGTCCAAAACGTGTGGGAATGACTAAATAAATGATGACACAGATGTTCA  
TGTTTTTAAGAATCCAGTTAAAACTCATAATGTTATTTGTTTCGGTGATGA  
CATATAACCTGAGAAATATCAGTGTAATGTGAGTGTGTTAAGTATAATCA  
AAATTATTAAAGTGCACACACAGACACAAAGGATGAAAAATACATAGTTAT  
CTCTGGATGCTGGGGTTATTCTAATTTTATACTTTGTTCTTTTAAAATAT  
TTCTTGGAATAAGCATATCTTATTTTGAAATCAGAAAAAAAAAATCTGAC  
CATAAAAAAAAAAATGTGATAGAAGTTGAGAGTGAGCCAGTAGAAGGATTA  
CCATAGAAGACATTGTCTAGTGTGACTACTCCTTATTTTGGATTCTCTGGA  
TATTTTTTGAGCTCTTATGCATACATAATATGGTATACAGTGGGGCTAAA  
AGGAAGGCATGTTCTTGTGCCACTCCCCCAAGAAAAATTTGGATGGTATA  
ATCTTCTGATCACTGGCTCATGATTCTACAAGTGTGGAGTACAACCTGCTT  
TTTTTCCATGAACAAATAGGGACAGGGTAAGAAATAGGAGAAGGCAACA  
AAAGTATATAAGCCCATCCGGCAGGCAAAGCAGGCATCACCTCCCATATC  
CATATTCCTCATGGTCCTAGTCTTGTCTAGGGCAATAATTACAGTCTCCCT  
TTCAGGAAGGTCTGATCCCTGATAAATCTTTAAGAAAAGAAAAGAGACAC  
CATTTGTCTTTGTAATTGATATTCTTTTTGATAGATGTCTAAGAATGAGC  
AGGAAACAGATACCAGTGTAGGAGCAGCAGAGGTGTGAAGTATATCAGA  
ATCCCCCAAAAAGGGGGTAATAATATGGATTACAAGTGGATATGCTACA  
TTAATCAAATTTAGCAACTGAAGTATAAAAAAATTAATACAACCTGAAAT  
AAACACAGTTATCTATAATTAGTAACTATATGAAAGCGGCTTTTATCCTC  
TTCACAAAATCCCAGAACTCTGTCTAATGTAACCGCAGCTCATTTTGAAA  
ACCCTTCTGTTGTGTTATTTGTGACAAGGGAACAGCTCTCTGACAATAGC  
TAGTTCAGACATGCATTATTCATCAGTAATATAAGCTGACAGTCACCAAA  
GTAAGAGCACAGTGTTTTATAAGACTTTGTAACTCTGGAAATAATGACA  
GTTCAAGTTATCACAGAGCTGAGAAATAAATTTAGGTTTCTAAAATAGCA  
ATCTGAGAGATTACTGTTTTTGTCTGGTTGTAGTGGAGACGCAGGTTGAT  
CAGAGTTTGAGCCAAAAATGTATTTTATTCCAAAAATGTATTTTATTAGA  
CTTAATAACAGCATCTTCCCTTTGTAATGTACAATGAGATGCGAGGAGGG  
CATCAGTGTCTTTGACTCGACTATTTCCAGAAGGCTCTGATTAGCGTGGA  
ACGTGAGGAAATAGCCTTGAGGTGCTCTTGAAGAAGTGTGGGTGATGTG  
ATGGCTTAGGAACAAAACAGGGATCAACTGTCCACTCCATTATAGCCCTG  
GGAAGAGTCCCTGTTTCTTTGCTAGTCTGTATTTCTTCCACTGCTTTGCTA  
ATGCACAGGGCTTCATTTGCTTAACCAGAGAAGGGGAAAAACAGGAGGAT  
TTGGACTAGAACTTTGGTTGAAAATGTCTATAAAGTTAATAAGTACCATT  
AATGACAAGTCAATATATATGCACATTTTTTGCTTAGGATCTATTCTGAGCAT  
CCTCTTTATTCTATAAAAAGCATTTATTTGTTGGAGTCCAGGTCTAGGAC  
ATGACCAGAGAAGATTAGGACACCATTCTGGAATCGTTTAATTAAAAAAAT  
AAATTTTATCCAGTTGATCATGGTCATCCGTTCAAGAGAAATAATGCTGC  
CTGCGGTCAAGTGTATCAAGAATACCAACATCTGCTTTGAACCAAAAGGT  
GAAAGTCTTTGTAATAAAGTCCTGTGTTGAAAGAAGAACTCTCTCCATAC  
ACAGACATTCAGAGCTTCCAAACAGAGTTGGGAACACAAAAATATTTGAG  
CCTTTAGCATTTGGAGATGTTTAGTTTCATAACCATAACATTTAATAGGC  
ATGCGAATCTGGGTATGTGTAGAAGGGTCAAAACAAAAGTGGGTCTTCCT  
TTAAAGTATTTTATACTATGGTCTAATTAAAAATAAAAGATAAGAGGAAA

CAAGACATCCAGATTTCAAAAAATCTGCATTGAAAAAATCCATGCATAAA  
AGATATAAGTATTTAAGATTTGCTTTGCTAAATCATCTTTTTTCCCTCTC  
TTGAATGGCTTTAGATTTTTTTTTTTAATTTAGTTTCAGGGACTATATGTAC  
AGTAACACCAAGCTTTTAACAGCTGCATTCCCCCTTTTGCTGTCGTAAT  
TATGGTCTCATTAGGATTCCAATAAAAAGTCAAGAAAAACCTTTTTTTTA  
AAAGAAAAACAGAAGTGCCACAGTGTCTCTCTACCAACATGCTATGCTT  
TTAAAATATTTGCATTTGAAATTCCTCATTGCAAATATTCTCAAACCAA  
GGTAAATATAACACTTAGATTACTCCCAGAAGAACATTCTTCTGCTATT  
AATACCCTGAATTCAAATCAGATTTTTTGCAAGTCTGTATAATTTTACTG  
TATGTACTTTATCCTGCAGTTTGGCTGGCTGTAAGTGTTAGAACACTGGA  
TGCATCAGAAATGAATAGAAGATGACATCTCTTGCCCTGAGTGAATACTTT  
TTCTTTCTCTTTTCTTTTTTCTTTTCTTTTCTTTTCTTTTCTTTTCTTTT  
CTTTTCTTTTCTTTTCTTTTCTTTTCTTTTCTTTTCTTTTCTTTTCTTTTCT  
TTTTTTTCTCTTCTCTCTCTTCTCTTCTCTTCTCTTCTCTTCTCTTCTCT  
TCTCTTCTCTTCTCTTCTCTTCTTCTCTTCTCTTCTCTTCTCTTCTCTTCT  
CTCTTCTCTTCTCTTCTCTTCTTCTCTTCCCTCTTTCTCTCTCTCCTCTATC  
TCTTTCTTTTTGGCTTTCCATTTAATAAAAACAACCTATTTATAATCTCAG  
ATTCATAGGGATAGAGTCCTTAGTTAGACAAGAAAAAAGACAAGTCTCTC  
TCCAAGAAAACATCAAGCACACACATAATTCCAGTTTTAGTAGTCATTAA  
ACTAACTGTAAAAACAAAAACAAAAACAAAAACAAAGAGTATCA  
GCTCTCCCCTATCATTTTATGTGCTTTTTTCTTCATCTCAAAGCTAAGTC  
ATGTTCTAGAAGTTTTTCAGCCTTCATGCTCTGGAGTCAGTACCTCCCCAT  
GCTGCTCATAATCAGAAGCCTTCCTTTCTAATCACAGGCTGTTTGCTGGT  
TGACCCATTACCTGGACTCCTATGTGTTTTGTTTTGTTTTTCCCCTCGGA  
CTTATACATGGAGTTAATCCAACCTAAGGTATTACAAACAATATTTTAA  
AGTGGCTTATAATACCTCCACCAAGAATAGTGCAAAATAAAGTAATTTAA  
GGGCTCGTTACAGAGAGGATAATAAAACATTTAGGACCTACAGTGTGTAC  
TTCTTGGTGGCTTTCTGTGCTCCCTCTGAAGAAGGCCACCCCTGAAGCA  
CACCCACAGCAAAAGGTGGGACATAAAAAGGATCTAGTAACAAAGAGAAT  
GTTGGTGGTATTTTCCAGAGCGGTTTCCAGTGCAAGCACGGGAGCAAAAG  
CAAGATGGTAGAACTATGGGACTGAATGGAAGTTAGGAAGTTGTGTCTAG  
TAAAAGTAGATAGTCCTTTTTTGAGAAAAGTTGGCTAAGAAAGGAGAGAG  
AAGGAAAGGGAACGTTTTTTTTTGTTTTGTACTTCAACAGTGGGTGATTT  
GGGCAGAGAAAAGTGGAAGAAGTTTGTAGAGAAGGAGAAAATAGAGGAAAT  
ATAATGGAGGAAAGATACTGGAATTCAGAGGAGGAAAGAGGAGTCAAGG  
GTCAGAGTCTGCTGAAGAGAGAAACAGGGGGACCAGCAGGAGGGTACCTC  
CCCCGGAGAAGAAGGGAGATGGGAGGCCAGGATGGGCATAAAGGTGAGAC  
GCTGGCTCCGGATTACAGACTTCAAGGAGTTTTTACCTAACAGATCTTTTT  
TTTTTTTCTGGAACAAAAGTGCATTAGTTCATCCTCTAGGAGGAAGGAGG  
ATGATAAGGGTGAAGGGGCGGATAAAGAATCTTTGACAATTGTAAATGT  
TTGAAGTAATCGCCACAGGACACGAGGGAGAACAAGTTTCTGGAAGTGT  
TTTCCATGAGTGGTATTACTGAGTTAAATACAAGATATTTTATTTTATTA  
TTATTATTTTTAATAGCATTGCCAATTTTGCCTCCAAAAGCAAGGTTTGC  
CATTTGTACAGCATCCAGCAATAGAACAAGATGGAATTCCCTGGGCCAGC  
CCAGCATGCTGTTCTCCTTGCTTTGTTCCCTGGCTTCCTTTCTATCACTT  
TCACCTGCTGACTCTCCCTGGGACAGAGCAGGAGCAGGAGCAGGAGCAGG  
AGCAGGAGCAGGAGCAAGAGCACACTGGCTTTTGTGTTTCTTCTGTTTCC  
ATCACCCAACGTGTCTTTGCTCTTTTCTCTGAGGACAGGCCTGAATGTC  
ATGTAGGGGGCATTTCTTAAAGGATCCCAAGAAACACTGCCCCCATCCA  
CAACCCATTCACTCTCTAACCTCTTTCTTTGTTGGCTTTTCTCCATAGTC  
TCCATATTTTACTATTATATAAATTGCATCGTTTGTTTTTTACTATTTGTT  
TCTTCCACTAGAATATAAAATCGAGGAAGATGGGGACTTTGTCACATTAA  
GCACGTATTTTTTAGCTGCTAGAAAAATACTTGACAAAAGGTAGTCATTA  
AGTAATTTCTTGAAGAATGAAGGGAAAATTAATTTTAATTTAACCACATT  
CTTAAGTGGTTCTGAAGTAGATAGTCTCACTTAAAATACTCGATGTAAAT  
TTTGTGAGAAGCTTGTATAATCTTTTATGAGTTGTCTTCCTGTGCTCATC  
TCACTTAACTATTCCGATTTTAGTGACTTTCTCATTGATTTCTATGTATA  
ATAAACTATTATTCAAGAGTAGCATTTGTTGCACTTTTACTGCAATTTG

TTTTAATATGTTATTATTAATTTTGCTTACATATGGACATATTTGAAGAG  
TTAAATTCCTTTTTTAATTTTTTCCATTGTGTTCAATTTAGCAAGACATT  
TTACCACCATAGATTTGATTAGTTTTTGCTTTAAATTTTTTCCAGTGTT  
TTACATTATTTTCCAATATTTGATTTTTTAACCCTCTTTGAATTTATTTTG  
ATGTATAGCATGGAGCAAATATCAAATAAGATATTTCCCCTAAATAACTA  
AAAGTAATTCTCCAGAACTTTTCAATTCTGCTTTTCTTCTCTTCCTTTATG  
ATTTTGTGCTTGTTTTGTTGTTTTGACACCATGTTTACCACAGATTAACAT  
TTATCTGTGAACATTATATATATATATTTACACACATTGTATATATATTGTA  
TATATAATACACAATCTGTTCCCTTGCTGATCTGTTTCAGTTCTCCTAACCT  
TTCTGATTAGATTTAAATATTAATTTTTATGCTGTTTTAATTGCTGAAGTA  
ATGTAATATATTTTAAACTGGAGGAATCTATTTTAAAGCTTCTTTATAT  
TAAAAACAAATATTTTCTATTTGTACCATCTTTTTAGCTTTAGTTTTTCT  
TATGCTCCATAGACTTTTCTTCTAAAATTCATTAAAAATTTTTATTTAAAT  
ATTTAATAACCAGCAGTTATCATGCTATTTATATATGACTATCACTCAGA  
AACTTGATTATGTCTCATTATACAATAATTTGATTATAATAAATATACTT  
TAGTTTCAGAAATATATTATAGTTATCTACATAAAAATTATAGCCTAGCAT  
TTGTTGTTAATATTATTCCTAGATAATTTAAGGGTTTTTTTTAGTACTGTT  
ATGAATGAAATATTTTATACATTCTACTTAATGGTTATTGATCAAGATTT  
ATATAAGGTATCCATATGAGTTGCTAATTAATTCAAATATATTTTCAGTA  
GATCCTCTTGTAATTTTTTATTTTTTATTTTAAAGATTTATTTGTTTGTT  
TGAGAGAGACAGAGAGCTGAGGGAGTATCAGAGGGAAGTTGAGAGGGAGA  
GAATCTTCAAGCAGATTCCCTACTGAGCACAGAGCCAACATGGGATCCTC  
TTGGAATTTCTAATAAAATCAACTCCTCATCTGAAAAAATTAATTTTCTT  
TCTTTCTTTCTTTCTTTCTTTCTTTCTTTCTTTCTTTCTTTCTTTCTT  
TTTCTTCTTTCTTTCTTTCTTTCTTTCTTTCTTTCTTTCTTTCTTTCT  
TTCTTTCTTTCTTTCTTTCTTTCTTTCTTTCTTTCTTTCTTTCTTTCT  
GTCTTTCTTTCTTTCTTTCTTTCTTTCTTTCTTTCTTTCTTTCTTTCT  
TTTTTGCAACATGTATGGCTTACATTTATATTTTCATGTCATATTCCTG  
CTCAGAACTTGCAAAATAAGATGAAATGATACTGTTTGGCTCATTGCGCT  
TTATTGACTTGAGATAGAAATCTTTATCATATTGAATAGTATTTTTACA  
TTTCTGTTTTTAAAGAGTTTTTCATATGAAATAGGTATTAAGTGTGGTCAAA  
AACCTTTGCATCTTCTAATTGGATAATCATGGAGTTTGTGGTTTTTGATA  
TTTGACCAATTAATGGGATACATTATATTAATAAGTTTCATAATGTCAAA  
CAATGCTTTCATTTCCTTGGTATGTTTTTCACTCTTGAAGTAGTTATTTT  
GGCATGATATCTAAACAAATGAGTATAAACACAGGTGCTGAGAGAGTGA  
AATATGTAACCATGTTGATTCCCTTGACTACCCAAAGCCGTATTCAAAGG  
CAGATAAGGCAGATAAGAGTAGAGGTTAAACAACTAGCTGGTAAATTTGA  
TCAATATTGACAAATAATCTTGGGCATTCACTCCAACATCTGGTATTTT  
TTTAAAGCATGCTTTGGCTTAAGTCCTCAAGATAATTACTTTAACTTACT  
TTGTGTTGATATACCCTTAGGGTTGACATTAAGACAGTCAAAGACTATTA  
GCGAGACCTGGAAGGTAATTATTTCCCTTATTCACACTACATTGTCTACTGAA  
CAAAAGTGAGATTTGGCATCTTTAAAAGAATTAAAAATCTATAAGGTCAT  
CCAGTCATTGCCCTTAAGAAATGGATCACTGATCTATCTTGAAAGAATTG  
TCATGGACCATATTTTTATGCGACTGAAGTTTCAAGTATGTTATAATATG  
AATAATATCAAATATTTTGTCTTTATAATTTTGATTAACTACTTTAATTA  
CAGTAAATTAATTTTAAATTAATTAATAATTAATTAATATATAAAAAATAA  
AAAGGGAAAATAAAAATCATCTCTAATCCCCAAACCTGAAGATAACTAGT  
CTCTATTTTTTTCTTTCTTTCTTTCTTTCTTTCTTTCTTTCTTTCTTTCT  
GTATATGAAATTTGTTCTTTAAGTTTTTCACTTAACATTTAATAATTAACC  
AATGTTTTTAAAAATTATTAATACTATATGGTAAAGATGGTTCATAATTT  
GTTTATTTATTCCTGGTGTAGATATCTAAATGTTTCAGAAATAGTTTTTA  
TTATTAATAAGCTATGAAGACACCTTGATATCCAAATTATTGTCCAGAGG  
TTGACCATCTTTGTTTAATAAAAAACTATGGTATTTTTTATAAAAGGAATA  
GACAAATTTGAGTGAATTTGAATTTCTTTTGTGTATACATATCTGTTAACT  
GTATGTATGAGTTAGATAGATAAAGAACACGTATTAGTAAACCCAAAATA  
AAATGAATATTTCTTGATTACTTTTAGACATAATTTAAATTTTTATTAA  
AGAGTCATCAATTAGGGATAATATATAGTAGAAAATGTTTCTCATCTCTC  
TCTCTCTCTCTCTCTCTCTCTCTCACACACACACACACACACACACAC

ACACACGGTAATTGCAAAATCCTCAGCAAAGCCTGTCCAGAATATTACTT  
GGATCTTTTTTCAAACCTTTCCAATTGTCAAACTGAAAGATGGTATAGTTA  
TAAATATGGAAATCAGATATCTACAGTAAATAATTGAATTGGCAAGGTCA  
TTGTATATAATGTCACACAAAAAATTGTGTCTGCCTACCCCAGGAACA  
CAGAATTAAAAATTTTAATTTTAAAAAGTAGCACTGATGTTAGCATCAAA  
AAACACATTGAACACTTTTGAATAAATTTAACGAAGTTGAGGAAATATTA  
CACAAAACAGTATAAAACATTATTAGAAAAAATTAAGGAATATCTAAAT  
ACATTATTGTTAAAAATTACAATAAAAAGATGTCAGCTTTTCTCCAAGTG  
ATTTGTAGATTTCAGTATAATCCCATAAAAATCCCACAATTTTGATTGTGG  
GAACTGACAGGATAATTCTAAAATTTATATGGACATGAAGAAGCTCAGGA  
ATGTTCTTAAAAATATTGTAAAGGTACAAGGCTGGAGATTATACACTATG  
GAGCATCAAACTTATTTTAAAGTGTGAGAATTTAAGAGTGTGGATAGAA  
GGAAATATAAGCAGTTGAGTGAACAGAGAGTGAGAAATAGATCCATCCAA  
ATGTAAACACTTGATTTTTTGACAAAGGTAGCACTGCAGATCAATAAGTGG  
TATTGATCAGTGACAGTGCATATGGAAAATTTGGTCAGTGGACAATGCAT  
ATAGAAAAGAAAAAATATATATTGCATCTTGTTTTGATCACTGGCAGGA  
GAAAAATTATGCTATAACTGTGTGCTAAAGAAAGACTTCTTTTACATAAAA  
GAAACAAAAAATATTATTAACCATAAATGAAAAGGTTGATATATTAATAT  
CATTCAAATTAGGAACCTTCTGTTTCATAAAAAGACAATAGTAAACCACAGC  
TTGGGAGAAAGTATTTACAACATGTAAAACCTTACAGTGTGTTGATTGCATG  
ATCAATGAAGAATTTCTAAAAGTCAATAGATAAGAGAGTCAACACAGTAC  
AAATATAGGCAAATGACTTGAATAGTTGCTTTTTAAAAAGTAGGTATTCCA  
ATAGTCAATGAACACATGGAAAAGATGTTTCAGTCTCATTGTTTCATCAGGAA  
ATGCAGATTAAAACCACAATGTGACACTGCTATGCAACCACAAGAATGGC  
TTAAATTAAGAATGGAATATATTAAGAATGAGATTTTATGAAGATGTTGA  
GCAACTGTAACCTCTCATCTGCTGTTGGGAGTTAACTAGTACAATAACCCT  
GGGAACTTATCTATTACAATGGAACATATGTTTATCTAGGATTCTTTTC  
AATCCTAGATATATACATAGTAGAAATGCTTATACGTGTGAAGCAAAAAT  
ATATGTACAAGAATGTTGATAGCACCCTATTTCATAATGGTTCCAATTGG  
AAACACTCTAAATGGTGAATGGGTCAAAACCTGGTGATATATTCATACAG  
TGGAATACTATATACTATGTAACCTGTTAACAAAATACCATTAGCCAAAAA  
GGGGTGGATCTCACAAATATAATGTTGAATGAAAGAAGTCAGAGGCAAAT  
GTTTCCATGCATGCAAAATTCAAAAACAGGCAAAATATAAGTAGGTAGAA  
GTCAAGAAAGTTATCTTTTGGGGGGATAGGGTTATTACAGAGGCTCTGGA  
TGACTGGTGATCATCTTACTCATCACCAGTTGATGTATTCATTTTCTGAA  
TGTATCACCATATACTTAAAAATTTGTGCACTTTTCTCAATGTAACCTATA  
CTTCAATTTAAAAAGGTATTTTTTATAAACTCAAACATGTAGAAACGACC  
ATCCTGTGGAGGGTATGAAAATGTGAGTAGCACACATATTGGCTTCCCAG  
TACTTATAAAGCAGGCAAATGCATGATGAACAATATTCAATATATTCCAT  
GGAGACTATGCAATATTATAAAAAGAAGATGTAAAATAGTTCCAAAAAGAA  
GCTCAGGTACATAGATAGGTAGATGAATAGATAGATGATAGATAGTTAGA  
TAGATAGATAGATAGATAGATAGATAGATAGATAAGAAATATTATTAGCT  
CTGAGAAAGAAGGTAATCCTGGCATTGTGAACAATATGGATGGACTTTGA  
GGATGTTATACCTTAGTGAGATAAGTCAAAGAAAGGCAAATACTGTCTGAT  
ATCACTTATCCATGGAATCTAAAATCTCCAAGGTCATAAAAACAGAGCAA  
AATGGTGGTTGCAAGGACTAGAATGTGGGGGAATAGGAGGGATGTTATTC  
ACGGGTACAAACTTTTTCAGTAAGTTTAGAGATGTAATACACAGCATACTTA  
ATATAAACAACAATATACTTAATATATAACAACAATATTGTATTATCATCA  
TCATGCTTGCTAAGAGAGTAGATCTCAATTATCCCAATCACACACACAAA  
AAAGATAATAATGTGACATGATAGAAGGGCTAACAAATTACTTTAATGGC  
AATCATATTAAAAATACATAATTGTATCAAATCAACATGTGTACACCTTAA  
ATTTATAAAATATTATACATTGGATATATTTCAATTTAAGAAAAGAACT  
CGGGTTATTCTTCAAAGAAGCAGCAGCAGCTTTTGAGCTGGGTCTAGAGA  
CAGGTATGCATTTTACAGATGAAGGGATGAAGAGGAGCATTCCTTTCAA  
GGAAATATTATGAACAAATAATAAAAGGCATAGAAATTTTGGGCATATTT  
GAGAATGACAGGATGTCTATGGTTCACCCAAGATAGAATTCATGTCAGTC  
TGGACAGAGGAACTGGCAGGTGGTTTGAGCGCAGATCCCGCCAAATCCA  
GGATGTGGCCATTGAAAATTTATCGGCAGCTTTTCACAACAGCGAGGAAA

GGATGAGCCCAGAGGCAGAAACCAACTTCAGAAGCCACTGGGCTTTTACC  
CGTGCAAAATAGAAAAAAATTTTCCATAACTAATGCTAGTGGTGCAGC  
CTGTGGATTCAAGCGTCCAGTAGTTCTGATTTTAATGCAGCTCTGTTTCA  
TACTGGCTTTGTGACTTTTTGTAAAGTTTTTTATTCTCAGATTCTATCCT  
TGGAATATGGTGACAGTCATGGTGTGCCTCATTCCTACGGTTGTTAGGTA  
TTATGGGGAAAACAAAATAATTAAGGCTTTATCTCTGCCCCAAAGGGACT  
TAAGGAATAATTGGAGAGGCAAAAGTTACATATTCATTATTATACCATTT  
TATTTTATATGCTATGTTACAGGCTAAGTTCTGACAACACAAAACCTGGT  
CTTGCCTGTGAAGATGTTTACACTGTTGCAAATATAAATATTCATATACA  
CCCTTCTAAAATGCAAGATAATTGCTGCAGTGTGTGTGTGTGTGTGTGTA  
TCCATGCGTGTGTGATCATATTTCAATGACCATTTATTGTAATGACTACA  
AAGGAGGAAGAACAGTTAAGACTATGTGGGGAAATCAAGTTTGTCAATAT  
TCTATATATGATTTAAATTATATTCCTAGGAGAAGAAAGTTTATGGTGTG  
TTACAAACAATAAGATTTGTAAAGCAAAATAAAATTTTACCGTATATGCAC  
TTGGAAGATTCTAGCAAATACTCTTAGGTTTTTTTTTTTTTTTTTGATGTA  
ACAGCACTTTTTCTTTCTAAAGAATAAAGGAATAAAGGCTTTCAAATATT  
CAAAAAAATTAATGGAAGCACTTAGAATTTTAACTAGCAGATGGCAAATA  
CTTAAAGTTTAAGTAATGTTAGAATCCTAGTCAATAATTATTATCACCAT  
TACTGATAATTTCAAAGAAAATAATCTCTCAGGCTGAGACAGGTATGCCCA  
TTTTAATCCTGGGCAGTCTTTTCCAAATACAGCTTTGGGGACAGAGAAAG  
TTGACTGGATTTTCAAACAAATGTTAACATTTGCAAGCAAGTTTTCCTG  
GGGAACCTTCCTATGATACACTGAAACGGAAGTATATAGACAGTCCAGACA  
ATCAGGCAAATTGTATGATTAGTTACACCTAGCTGCATTTTTTTTTAAACA  
TGCAACTTAATGTAATTGACAGAAAAAAATTGTTTTGCCCCCACCACCAA  
GTTTCATGTTTCCATATAGGAAATCTATTTTACAGTGGCATTTCGTTT  
TTATTTAGGTATCAAATTATCCATGAGAAAGAGAAATATGTATTCCTAAA  
TCTCAGGAATTGAGAGACTTGAAGAAAATTTGATTTCTATCGTCACACTC  
TTTCCCAAGGGAAAATCTTGCAAATAATGTATTTGTGGTACTTTTGCAA  
AGTGTTTTTCCCTGGGCAGTCGGAGTTTCTGTAAAAGCAGGTTATATTGG  
AAGACAAGCATTTATAGAAAATGAAGTCATATTACTAAGGAGAAAATGTT  
TACCTGGTGAGGGTGGCTTGACAGACCTTCCAGTATATATATTTAATATTT  
TAATAGTAAATATTTTAATATTTAATACATAAATGTGTAATGTATTTTAA  
TAATATTGCAAACAATGAGATCTCCAGGTGTAAGTTGCTGTAGGTGAGAC  
TGTTTGGTGCCTTTTCAGATTGTGCACAAAACTAGGGGTTACAGTCTTGA  
TTACAAACTGGAGTTTTCTAGGGGAAATGATAAGTAACAATAAAACCCCA  
ATATGTTTCTTAGGTCTCACTCTCAGAGATTTTCAGTGGTCTTGGAGCAAT  
ATGGGGATGATGATTTTTAGCTCCCCAGGTGATCTTAATGCACCGCCAGG  
ATCTGGGGCGATGCACTAATCTGTGAGATAAAAAAATTGCACTAATCTGTG  
AGATAAAGAATTGCTTCAGTGATGGGTAGTCTGAAAAAACTAACACAAC  
TTTTCCCAAGTCACTGGTACAAGGTGGCACAAGGGCTCTCAAGAATGGTG  
ACCACTTCAGTTCTCTTCAGTCCCTCCCAGCCACCTGCAGTTTGTCTTGG  
CCATTGGTGCTTGCTGTCTGTGGGCAGGTGAGGTGAGAAGGAGGATGAAT  
GGGCTGTTAGAACTTGTCCTTCTCCTCTTTCTCTTTCTTTTTTTTTTTTT  
AAGTTGTTATTTATTTATTTGAGAGAGAAAGACCATGAGAGAGAGAGAGA  
GAGAGAGACCAAAGCGGAGGGGAGGGGTAGAGGGAGGAGCCAACCTCCTCG  
CTGAGTAGGGGGCCTGATGCAGGGCAATCCCAGGACCTGTGATCATGAT  
CTGAGCTGAAGGCAGATGCTTACCTGACTGAGCCACTCAGGCACCTTTCCT  
CTTTCTTTCATAAAGCTGAAAGGTGGGACATTTTAGATGCATCTCTCTGC  
TCTAATTTGTGCAGATTTCTTTGGGAATAATGGCTTGCTAAGTGTTTTT  
TGCTAGGGGTATGAGAGGGACAATGGAAGCTTGATATAGAAAAGCTTCAGA  
GCCATTGGGTGAGTTCTGGGTCACAAGAAATGTGGACAACAGTGATTTAG  
GCTTGGAAGACAGAAGATGCGCAGAGTGCTGACCTAGGACTTGGGCACCT  
GCTCCAGGTCCTGGGCTTGACGATTTGCCGTGGCCTCCCAGGAAGTCCTC  
AGCTTGCTCTCATTTACTCTGTGACCAATTGTTGACTTCTTTCTTATAA  
AACAAATGGATAAAGCCTCTATGAAGATAGACATTGAGGTTCTGAAAAGC  
AAGCGATCCGGATTAAGAACCCAAGTTCAGACAGTCTGGGGTTACCCAA  
AGCTCTTGCTGACCTTGGTGGGATCTCTATCTTGGGGAGAGTTGTCATGG  
CTTTTCAAAGAGGTCTAGCACAAAAGCCTCCACATATTTAATTTGTTTT

TCAAACAGCTAAGATTTAGTGTTAAGTAAAAGACGATTGGTGTGTCCAAG  
TCCATGGGTAACAAAGCTCGAATTGCCCTAGGAAGTCTGCAGAATGATCT  
GGGGCTTTAGGGGTATAAATCTGACTTTAATTAACCTATAAGGCCTTATT  
GTCAGCCTTTATTCAACCCAAAGGCCCACTGATTTTCTCCTTTGATTTTC  
TGCACTGAAAGATTGGCCCTAGTCAAATACTTTCCACGGGAGTATAATTA  
TGTCTTGCAAACAGTTTTTCAAAAATCATCAGGCCCAACAATTCATTTGT  
CTTGCAAATTCACAAGGAATAAAACCATATTTATTATTAATGCCATTGC  
TACCTCCTTTTCTTTTCTGATCCTGAGAACCCAACTCTATCCCCACTGTG  
TCATTTTGCTAAAATGACACACACACACACAAATTTATCTGCAGAAATGA  
TGTTTTTACATTGCTTGATTGACCCAAGGAAATAACCACCACCACAACAA  
ATCCTAAGAGGGTATGAAAGAAGGAAAGGCTTAATTCATTTAATTTGTCA  
GGCTCCTCGTTTTCTATTAAGCCTACTTGATATATATTTTTTTTAGTAGTTG  
ATTTTATGGCATAGCTTATATGCTTTGCTTATATAATTTTAGCAGTTACT  
AAAAATTGGTACAACCTTTTATCTTAGGTCATTGAAAAATTTTACATTTAAT  
AAAAATTAATTAAGACAAGAATAAGATATTTGGGATTTTTTTAGTTGGA  
GAAAAGCATTGGAGTTTCTTGTTAGAGATTTCTGTGCACTCATAGGAA  
GTGGTATGCAGCTGAGAGAGCCACAGGCCCTGTGCATTAGAAGTACTGA  
GGCTTCTTGATTGGTGGAGAGCCTGAGGGCACAGCCTGGCCTGGAGACAT  
AACGCTTCTGAAGTGAAATGTGTGACATTGAGCAACATATTTACCTTTC  
TGAGTCCAGTTTCTTTTCTTTTCTTTTAAAGACTTTATTTATTTGAGAG  
AGTTGAGAAAGAGAAAAAGAGCAAGCACGAGCAGGGGAAAGGGCAAGAGA  
GATAGAGAGAGGGAGAAGCAGACTCCCCACTGAGCAGGGAGCCTTATACA  
AGACTCAATCCTAGGGCCGCGGGGATCATGACCTGAGCTGAAGGCAGATG  
CTTAAGTACGAGCCACTCAGGCAACCATCCAGTTTCTTCTGTAAAG  
TAAGAAAATAATACCTATTCGACAGGGTTGTTGAAATACCTGCTGTAGCC  
AATTTTTATTAAGCATTGCTATTTGTCAGGCACTATTCTATGTGCCCTATA  
ATAATTAATGTATTAATCCTCAAAAAAACCTGTGAGCTGGGTTAGTCGTG  
TTAGCCATATTTTACAGATGGGGAATCTGGGGGTACAAAACAGATAAAACA  
AAATGGGATGACCCAGCATTTTGTGGCAGACCCAGGATCCAAATCTATGT  
CTCTGGCTCTGGAGACCTCAGTATACTTACGCGCAGAGGTAGGCAATGTT  
ATTAATATGCAGTCAGACTTGCACACCCATGCTGGTTTACTTCAGACTTC  
AATACTTAGTTGCCCCCTCTTTTACACACACACACACACATATCCTTG  
ATGATAAAAAAAAAAAAAATCTTGGCTTCAAAGTATATTTGCTTTAAGCTA  
GATGAATAAAAAAACATATCTGGCAACTTGCCCTTCTCTTTTATATTGC  
AAATTTACAAAATAAAAGGAATCCAACTCAGCTGCTTAGTTTCCCACTTT  
TTTACTGATCTGCAGGTCTGGCTGGCTAGAAGCTTTCTGAATGACTGTG  
TTTCCATTCAATGTGGTCTCATAGCATGCAGAAGAATTCAGAGATTTTC  
AGTTGGAATGGTGGTGGCAGGGCAACCGCACATTCTTAAAGTATTGCAAA  
TGAACTTTTGCCCCCTTAAATCATGGGACAAATACAGAGGTCTTGATGGAC  
TCTCCTCCTTTGCCCTCTGCTCTGCTGTGCTGTGCCCCACTTTGTTGTG  
TGCTGGTTCTGTGTAGACATTCCCATCATGGTGCAACCTCTAAGACCCT  
GCAGAGATTGATGTGTCTGCAAGAATGTGCTAAAGAGATCTAGAGCAATG  
GTTTTCAACCAAGGGAGATTCCCACTGCCCTTCCCATCCAACCACAGA  
TATTTAACAATGTCTGGAGTTGCTTTGGGTTTTTCAGATTGTGCTGCTAAA  
CATCCACAGCCCAGAAGACAAGGTCTCACAATAAAGGATGATCCAGGCT  
AAAATGTCATTAGTTCCACTGTTATGGAACCTTGATCTAAAATATCTTCT  
TTGAAAGTCACTTCTTAGGAAAGGACCCCTGAATTAGGGTAGGTATCTCT  
ACAAGCATCTCTTATAGTGCACACTTGGGGAATGTAAATAAAAATCACAG  
TATGATACCATTGCACATGCAGCAAAAGAGGTAAAATGAACAGCAAGAA  
AATACTAAGACTGAACACCTCTGTAGCCAAGTACTTTCATATTGGTTT  
GGTGGGAAAGTAAATGGATACAAAATCACTTTGAAAAATGTTCTGTATT  
ATCCAATAAAGCTGAAATAGGCATACCTTATGGTCCAACAATTCCATTCC  
TATACGTATACCCATCAGAAACATGTACATAAGTTTACCAAAAGTATGCA  
CTAGAATTTTTCATTGCAGATAGCTTTGGCAACTGTCTAAAGTCGCCAAAA  
ATTGAAACAACCCAAATGTCCGTGAGTTGTAGAATGGGTAAATAATTGT  
TGTATATTCACATGATTGCGCACTATGGAACACAAAGCGGGGAAAGGACT  
TACAACCTCATACAGTGTTATGGTGAATCTCATAAATTAATATTGAGTGAA  
AGAAGGCAGACGCACATATAAAAGTATATGATTGTATAAAGTACAAAATA

GGCAGAACTAATCTATCTTATTAGAAAGTCAGGATTTTGATCATCCTTGGT  
TAAGGGTTAATGATTGGAAAGAAGCATTGAGGAGGACCTTAGGGGGCTGA  
TCGTCTTCTGTTTCTCAGTTCTGGTGCTTTGCCAGGTGTGTTCACTTTG  
TGAAAAGTCACAGCACTCCATACTTTTATATGTGCACTCTTCCGTATGTA  
CATTATTCTTCAATAAAATTTTGAAGTGTGCAGCTGGTACTCTGGAAAG  
TGGGACAGGCTCTGGATATTTCTACTAATTTTCCCCTTGCATTTTAAGGT  
GGATTGGTCCAAAGGCACCTTAAAATACAGAGGTTGGCCTGGTTGAGCAG  
GAGACAGCCTAGGCACAGATGGAAGATTTCACTTCAGAGCAATGTCTGAA  
CAAAGGAATGATCTCAAAATTAATTTCAAAGTCAATATTTAAGAAAGACA  
CTCTTGTTGCTCAGCGCTGAATCCAGGGGGACCAAGATGGCTGTGTTTAG  
AGTAGCTTGCAGCTTTGCTGGATAGGATTGAGGAAGCTTTAGGCAGAGGA  
TTGCTAAGAAGGCAAGTGTCAAAAAGTCTGTCTTGCAATGGCACTTTGCT  
CATGCCATGATTTTGTTGATGCTTGACCTAATCATCTCTTTTTCTCTTCA  
TGGCAAAAGAGATAATGGCCATGCTTTGAACACAGGCTCAATTCTTTTTA  
ATTTTATTACGAATCCCTAGCAGTCAGATGGCACTGAATGTCTTTTAGTT  
GGTTTTGTTTTGTGTGGTTAGCTGTGATGCTAGAAAAATTATTTTTCTCT  
GCTTCAATTTCTTATATCTAAAAGGCGCATGAAGATAGCATTGTAAGAG  
GTAAAGTGCTCTATTTATGCCTAATATTATTATACTAATTAACATTAAAT  
CCTGTTAATAACTCAAGAAAAACAGATTTAATGTGAAATCATGAGATCCCA  
GGGGAACTTTCCAAAGTTCCGTCCTTATGGCTCTTCACTGAAAAAGCCT  
TTTCTTTCAGCTCTTTAAGCTTACTCCCCTTTGTAGACCCCTGCTATGGG  
AGGGCTTCCTTGGGAGTTCTTAGCAAGGAGTAGTTCTGGAAGGAGGCACC  
TTACCTAGAAGCCATGAGGGCTCACAGTGTACAGTTTGTAACTGTACA  
GTGTTAGTACTGGCGGCTGGATAGAGGTTGTCATTTTACCCCTAGAGAAA  
GGTCCCGCTGTTGAAGGCTAGTGTAGACAAATAACATATTTTAAATGTTG  
TACAGCATATGGAATTTCTATTACTGCAAACATTTGGTTTGGTTCTGTG  
CCTGTTCAACATATTGCACATTTCTAAATTAACCATCTTCTAAATGGAGT  
ACAGTTATGATTCATGTTTGCATTTCCCCTGTGGGTAGAAAGACTCAAGGT  
GGGTGCTGCATACTTGCCTTTCTACAGCCACATGTATGGATCTCAATCCT  
GAACGTTGATTTCTTGTGCCAGCCAAGAGGTGAGCTACTGAATGGGAGT  
GAGGGACTGGAACATTTTGTTCAGAAATATCCAGCATGCCAAATCTGACC  
CTTTTAGAACCAGAAGGAGGGCAGAGAATTGCAATCCACAATTTCCCCCA  
CTGACAGTTCTCATTTCCTTCATTTATGAGACTAATCTTCTGGCAGGAAG  
AACTGGGATGGGTAATTCATGTTATATTTCCCTTTGGTGTCTTATGTAAAG  
TACAACCTTCTAATAAAAAAATCTTAATTAGAATCCACTTCTTTGAAG  
CATTTATCATTTCATTTTCTGATTAAAAAATTAGAAAACCTGGGTAAAA  
AGCATAAGTCAGAACATAAGATATTTTCAATAAGTTGATGAATATGTGAG  
TGTTCTTAATACTATTCTATCTACTTTTAAGACTTGCTAGAAAACCTTCA  
TTATAAAAATGACCCATAAAATTCATTATCCAGATTTTATTACTACGAACA  
TTTTTGTGTGGTTCCATATAATATTTCCATATTAGTGTTTTATTTTCGA  
AATGCTGCTACATTCGGTGAGTACTTGTTCATTAACCTGATAAACTTG  
ACAACGTTTGTGTTTGACCTGTTGGCCCTTAAAAAGAAGGGAATAATCCG  
AACTTTTGTTAGGGATAGGGTTAAATCCCAAATGAAAATAAATGAAAA  
ATGCCTGGAATAGTAAAGTGTGTCAGTGTGTAACCACCTAGCCCAGTGC  
CTAGTACTCAGTAAATAAATGGAACCTCAGTAAATGAGCAGAATTCAGAC  
ATGATGTGTTATCATAAAGTCTTTGACCTCATATATTAGGAATTCAGA  
GTGAATCCACATCATCTGAGTTGAGACAGAGGTTGCTTTACTTCCTGAG  
TAGCTTTTGAATCTTGAGTTTACATCATGGATGTAGCTATAGATTCTCT  
CACTGCCCTTTCTATGAATGGAAGGCTGGCCGTTTTGGGGGGGTGAAGGG  
GAAACTTATGTCAATTATCAACTTGTTTGCTTCCTTGCCAAGCCAAGATCT  
CCTTCAGGAACCATACCCGAGTCACTGAAAAAGCAGAAAAAGGTAACACA  
TGAATCAGGGTTGCTAAATTGAAACTCAGGAGACTATGGAAACCATAATG  
GTTTTTTGTTTGTGTTTTCTGCTTTTGGGCTTTTGGTTTTTTTTTTTTT  
TTTTTTTTCTTGCTAACTGGAAAGAATACTTTGCTTTACTAGAGCCATTC  
CTCAAAGATGAAGGAAGTGCCGATGATGTGGAATTACCCATTGTGTTGGT  
AAATTTTCGTGTAGTATCTTTGGAGAGTTAGAGCTATGTGATATGCAGCT  
ATCACTCACTGTGATACGAGAAGAGGGACAGTGCATTTGCTGCTGTATTA  
ACATGTCGATTTGAGGCTCAGAGATTCCAGCTGGTCATGAGCTTACTTCT

TCCTTTCTTTGGCATCAAGGTGATGCCAACTAAAGGAATACATGGTGTTT  
GGGTATTAGAGGCACAGGACAACGTATAAGAGAATACGTTTCATCTTTG  
GCCTCCCTACCTTCCCTCAAAAAGCCCAGTTGACCTCCACTGCTTGCAGA  
GTGCTCTTCCCTTCTTCCCGTTCAGGCTTGCCCTCTCTAGTAAAACAGTC  
CTTTACTGCTGCTTCATTATCTCTGACCTTACTCTCACACATTAGAGAGC  
GTGAACAAGGTTTTAAATTGCCACCCATTTTCATTCTATGATGGCCTGGG  
TAAGAATTCTGATTTGCCGATTCTAGCTGATCTTGGACAAGTTACTGGG  
CTCAGTTTTCTCTTCTGTAAAATGTGATTAAGAATAATTCCTACTTCAAT  
GCATCACTATAACGAATAAATTAGTTAATATAGTTAATACGTGTTAGTGC  
TCAGAAAAGTGTCTGGCACGTAGAACTAATTGGTATGATTAATTCCTATT  
AAGTTGTTCAATTCCTCAAGGAAGAAATCCTCTTAGAGGCTTGATGCAGT  
TTAGTATTATGGGTTGGACATTGGTCTACAGTACTTCCTAGCTACTCTGT  
TAATCCAAATCAGGTTCCACGCTTCCAGTCTTATACTGGATAAAAAAAC  
ATCAAAACACAAGATGTTTACACCCGGAAGGAAACAAGTTAATGTAATATT  
TTCATTTTATACTGACCTGTTCTTCAGATTACAGTCTTTAGGCATTGTGTT  
CCTTATTTCTCTATGTAAGTCTGATGCCAGTGCTTTGAGACATTAAAGCA  
AGTCATTGAGAAAGACATTTGCAAATATTTGAAACATACTATATAGGCAA  
CAACCTCTTCTGCTTTTGGCTACTTAGAAGGAGGCAGCGCCAACACAGAG  
GTGGATTTTACTTTAGGCTTTTTGAATTCACGATTTGGAGCTTGAACCTCT  
CCCTTATAGCCACAGTCTAGACATGTAAAGAAAAGTCAAAGGTCACGAC  
CAAAAAATATGTTTACGTACCATTCACGTGGGAAAAATACCCAACACACACA  
CATCCCATGTATGATTGTGAGCCCAGGTTATTTCTTCTCTGAGAAGAAAC  
TTCTTGTTGGTCCATTTGCATGTGGTGCCACCTCTGTGCTTTTCTCCTAG  
AGATTCAGCACTGGAATGCTAAGAAAATAGTCTGAGCTCCCGATTCCCTC  
CTGAGATGATTGCCTGGAGGATCATGGAGGAAAAAATGAAAACCATTTTC  
CCTTATTTAAAAATGTGTGCTGAAAATACCATTCATCCTTTCCCTTTCC  
AGGAAAGTCCTAGGGAGATGTGAAAGATTGGGTACACGCATCATTCTAGA  
AACTTTGCCAATGAACAGTGTATTGACCCAAGTTCTGAAGAGGAAAGGT  
GCTCAAATATTTACCTAGAGCACTTCACTGAAAGGGTGCCCCACGGGTGC  
TTGGAGGTGGCCACTGGCAGGCTCTTGGCACCAACCACATTTCTCTGTT  
CTAAGGAACCATTCATTCCCACCTGGTGCTTCCCCACACCCACTGCCCTC  
TCCCTTTCCAGTACCCTGTAGGAAGATGTTTTACAACTGTGTGCATGGA  
TATTTTGTGCCTCCAGCAAGAATGTTGTTTGCCTAAAAATCAAGAATTAG  
AATAGAACTTCAGGAACCTGGATTTCCAGCCTCAAGTGCAGCTGTTTCA  
ACACTGTCCTGGGGAGAACTATCTGTGATATTTTCATCAGATCTGGAGAC  
AGACACTTGTTTAAAGATATACAGTAACATTCTTAGCCTCTTGGCCTTCAC  
GGTCTTTCTGTTTGAATTTCTCTTCCCTGTAAATAACTATAAATGTTAGT  
GCAAAATAGACACAGGTACCCCAATTTTCATCCCGAATGCTAGATATGAA  
TTTGGTCAAGTCATGTTTATGTTTCGTGTTATCTCCATTTCTTATTCTAAC  
CCAAAATAGTATAGTTTATGAGACTGTATTGATCAATTGGTGCTGCTAT  
AAAAATATAAGCATGTATCAGTGTATATATTTTATATGGTGAAATGAGTC  
CATTTTAAATGGATGTTAGTGTGGTGCTTAGGCTGAGCTGATGAGCCCA  
AAGGGAAAGCACTACTTACAGTCTGCCCCAAGCCATTAGGATAATCTTCCC  
TGATTTTCAAGATAAAATCCTCACAATTTTTCTAAGAATTAAAAATAAGTTT  
TTAATTTATCAAAATTAAAAATATTATAAGCTAAATAAAGTAGCTGGGAA  
TCCATGACAAAGCTATCCAGAGGAAGATTTTAGTTGTTTGTCTTTAATTA  
AAATTTGATTTGTGACCAGTAATTCTTTCTCTCTTAGTTTCGTGTCTTGT  
TTGAACATATCTTTAAGTTCCCAGGAGACCACCATACAGAGCTTGCAGGT  
GATTTGCTATTGCTAGCTGCATGCAGATGCTAAGGCAGAACTTAAAC  
CAACTTAGTTTAAATGCCACCATAAGGGCCCCAAGGTGTCATTGGTAAGA  
CACTGGTAAGATGTTAATAAGGGGACATGGACAAAGGAAGAGCAGAGTAC  
ACTACTGACCCAAGGAAAACAGGTGAAAGAACACGTGGAATGGGCAAGAC  
AGGTCCCCTCCCTCCACCCAGGAAGAGTTTACTCAGGAGACACCAGTGG  
CATAGTTTATGGGAGAAGTGGGCCTCTCGGTCTTGCTGAATTAAAAAGG  
AAAGACTGTAAATCTACTGAGTTTCTAGAGTTTACTCAATAATGCAACA  
AAAAATAACCAGTGTGAGTATACGTGGTTCAAACATGCCAGGAAGGCAA  
TGGAGCCAGTAATCTCTTGTCACTATTAATTAAGTATATCCTCTAACAGC  
CTTGACTCTGGCTGTAAATCTTACACCTTCCTTTGGGGTCCCTGGGCAG

CTGCTTTGGAGGTCTTAATGAATCTCTGACCAATCTGGGCCATGGTCTAG  
TCACAAAAACAACAGCCAGAGGTGTAATAAGATATTCTGTGAAGAATGCA  
TGTTCAATATTATTAGATCAGTTCTGCTGTTGGATAGCTGATATCACAGC  
TTACATAAAGGTGGTAAAATCTACAAATGGCATTCCAACATGTACGGA  
AGGAGAAGTCAGATGTTACTGAGATGGGGTAACTTTACCTGGTCAGACCA  
TCATGAAGTTACCAAAATCAAAGCAGGAAGAACTTTGTCTTCTATATTC  
CAATTTAATGTGGATCACTTTTTGGGGGAATTACTTTTTTAAAAAGAGCT  
TTGATTTAGTGACCAGTTTAGTAATTCTATATTGAGCCACATGTATTTTA  
GGTGGGAAAGACTTCATCTCAGTCAAGCCAGGGTTCCTCTACCAGCCTTG  
CCCTTGAGTTAATAAACTGCTTATGGTCTTTCATATTTTCAAGATGATGA  
GTGGTGTTCTTTAGTTGTCTTGATCCATGTGGGCATCTGTTGAGAAGAA  
GATCATTTTTAACTAGTCATCAGTGATCATCTACTCTATTAGCTGCTGAAT  
ATTAACCTTCAGACGTGAGACCCCTTCAGTGGTAGTGGTTTAGCTTAATA  
CTTCTTCTCATGAGCACAAGGATTTTCATCCAAGATGAACTTGGTATACTG  
GTTAATTTTCTGTGTCAACTTTGCTAGACCATTGTGCCCCTATATTTTCT  
CAAACATTATTGTGGATGTTTCTATGCTTTGGGGTGAGATTAACATTTGA  
ATCAGTGGACTTTGAGTAAAGCAGATTGCCCACCAAGAGTGGGTGGGCC  
TCATCCAATCAATTGAAGGACTGGATAAAACAAAAAGTCTGCTTCCTCT  
GAGCAAGAGGGACTTCTACCAGCAGATAGCCTTGTAATGTAGACTGCCAT  
GTCAGTTCTTCCCTGGGCCTCCAGCCTGTTAGCCAGCCTCACCTACAGA  
TTTTGGACTTGCCAAGCTTCATAAATGCATGAACCAATTCCTTAAAATAA  
ATATTTCTCTCTCTCTCTTTCTTCTCTCTCTCTCTCCACACACACAC  
ACCCTTATTTGTTCTGTTTCTCTGAAGATCCTTGACTTATACAGCTGAAT  
AAGAAAACTCCGTGGACTAAGACCCTTTCTTTTTTCCATCACTTCCACTC  
CTGACTCAGAAGCTTTTCCAACAAGTCAGGCTGTTTAAAGACCCCATCTGC  
CAGGGTATGAGAGATGTACTGTACATGGTACGAGGTACGATGTACCTTG  
GTGAAGGTACAGAGAAAAGGCTGTTCTTGTGTCAGTATTGGTAGGGTGTGAA  
TTGGTGAGCCACTTTGAAGAGTAACTTGAAAGTATTTATGAAAATAAAA  
ATGCCCAAGTCTGTGATATATTTAAGCCTAAGGAGAGAGTTGCAGGGAAC  
AGAAAACGAAAGGGGATATTTACAGAAAACACTCTAAATGATGGTGTCC  
AGGCAGCATGCTAACATATAAGGGAATGAGAAATTTCCCTCTCATTTCTGC  
ATGAAGCAAGGTGTGGCTGCAAAGGGGGGCTACACCAGCCCCCTCAAGAGC  
TGCACTACCCCATGGAGTACAGAAGGAGCAGACATAGCTGGAAAAGGCAG  
CAGTAGTTGATATGTTGGAGTGGGGCTGGGGAGTGTAACCAATGGTGGCT  
CAATATCAGCACACAATTCTCTACACATAGCAGGGACCTCAACGAGAGA  
CATAGGGTCAGGCACACTGATAAAGAAAGGATAAGTGTGATGGATGCGGT  
ATGACCCTTTTTGAAGATGGGATTTCTAGAGATTCTCCTAGGAGAATGTC  
ACAGGGACATTCTCAGTGTGGGATGTGAGGTCAAAAATCAGTAAAATATG  
AGTCTGTGATATTATTATGACCCATCTCAAGCCCCAACTCTTGTATCCT  
TTGGAAGTATGGATTACCATAATATTAAGAAAATAAACACATTTAACTAT  
CAACTTGCCCTTCTCTCTGTCTCTTAACTTCCCTGCTTAATTGCCAGACC  
CTGATATATTTCTTTTGGACTAGTCACTGCCCTATGGAAAAACACCTCAG  
TGTTTTAGGAAGTAGTAAAGGACCAGATGACATACAAGGAAGACATTTTA  
ACTCTTTAAATGGGAAAAAGATGCTTCCAACCTTCTGTGAGCATCTGTAGT  
CAAGGAAACCGAATTTCTATTACATATGATTATGATCAACAACAAGGAAG  
CTGTGAAGCACAGCCTTTTCTCCCTGCACAGCAGTTAACGGACACCAAGG  
AAAGTGTAGACGCTTCCAGGAAGCATAGTGACCCCACTGCAGTAGAATGT  
GTTTACTGAAATGTTCCCTGGGTGACGAAAAATAAAAAGCAGAGATATGTG  
TTCCCTACTCCTAGATGGGAAACGCATGCTCCAAGAGGAGAAGGAATTCC  
ACGAGGATCTCAGAGTGAATCCAGTGCAAGCCCTCCTCGTGACTIONCAGTT  
TTTTTTATTAGATTACCCTGAGCTCCTCTCACTAGAAAACATTGCAAGA  
GTACCCACCATCCTGTAGCATCCATGCTCCTTGACATTTGGCTTTCCAGT  
TCTCCTACAAAAAGGGCAGTAGAATGTGCTTACACATTTCCCTCATTAAGG  
GTTTAGTCATGTACCTTGCCCTTGCCCAATAGAGGAAGGTGTGCATAACTG  
GACACCTCACCTGAGTTGAGCCCTTAAGATACCTGGTTCCCATCTTCTCC  
CTTCCACCTCTGCCACAGTGGAGGGAAGAACTGTCTTTGCTATCCCCTGG  
GTCAAATGGAGCAGATTCACTTCCGCAGGACACAGTTTATATGAACTACT  
CTAAAATATTCCATTGCTGCATGAGAAATGGCATTGGAAAACCCATATGC

TCTCTAATGATTATTTATATAGACATAATGAACAATATGCATAGTCCCAG  
AGAATATATTTTTTTTGAGAATATATTTTCAAACGTTATTTAAAAAGACTG  
GGATGAGCACTGGGTGTTATTCTATATGTTGGCAAATTGAACACCAATAA  
AAAATATATTTATTTAAAAAAGAGAATGAAAAAAGACTGTGTAAC  
CTCAATTAAGGAAGTACATAAAATTTATATTTTGCAGGAGCAAAAAGG  
TTCAAGGCTATTCTCTGGTCTTTCTCTTTTCTATTTTTTAAACAGCTTTA  
TTGAGGTATAATTTAAATAAATTGACCTGTTTTGTGTACAATTCACAAAT  
TTTAGTATATACAGAGTTGCACAACATTAACACAATCTAATTTTAGCAC  
ATTTTCAGCCTCCTAAAAAGAAAGCTTATGTGCATTTAGAGTCTCTCTCT  
ACGCCTATATCCAGCCCTAGGCAACTATAAATCTACCTCTAGCCTCCAAG  
TATTTTCTTATTGGACATAAAAAAGGAATCATATATGTATTCTTTTGTGT  
CTAGGCTTCATCTTTTTTAAAAAGGTGGAATAAGGGGTGCCTGGGTGTCT  
CAGCCAGTTAAATGTCAGGCTTCGGCTCAGGTTGTGATCCAGGGATCCTG  
GGATTGAGCCCCACATTGAGCTCCCTGCTCAGTGGGGAGCCTGGTTCTTC  
CTCTCTCTCTGCTGTTCCCCCACTTGTGCTCTATTTCTCTTTTTCTCTGT  
CAAATAAATAAATAGATAGATAAATAAATAAATAAATAAACAACAAACA  
AACAAACAAATAAATAAATCTTTTTTTTTAAAAAGAGGTGGAATAATGCCTG  
TCTTCTCCTCTAAGGTTTTGATGGATTCCTGTGTACATTTAGGTCTTTC  
ATCCATCTTGAATTTATTTTTGTGTATGGTGTAAAGAAAGTAGTCCATCTT  
CATTCTTTGCATGTTGCTGTCCAGTTTTCCCAACATCATTGTGTTGAAGAC  
ATTGTCTTTTTTCCATTGGATATTCTTTCCTGCTTTGTCAAAGATGAGTT  
GACCATACAGTTGAGGATCCATTTCTGGGTTCTCTGTTCTGTCCTATTGA  
CCTTTGTGTCTGTTTTTGTTCAGTACCATACAGTCTTGATGATTACAGC  
TTTGTAAATAGAGCTTAAAGCCTGGAATTGTGATGCCTCCAGATTTGGTTT  
TCTTTTCAACATTACTTTGGTCTTTTCTGTTTCCATATAAATTTTAGACT  
TGTTTGTTCAGCTCTGTGCAAATTCCTGGTGTATTTTGTATAGGGATTGC  
TTTGAACGCATAGATTGCTCTGGGTAGTATAGATATTTTAAACAATGTTTG  
TCCTTTCAATCCATGAGCACTGAATGTTTTTCCATTTTCGATGTGTTTTT  
TTTAGTTTCTTTCATTAGTGTCTGTAGTTTTTCATAGTATAGATCTTTTA  
CCTATTTGATTAGGTTTATCCCTAGGTATCTTATCATTTTGGGTGCAATT  
GTAAATGGGATCGATTCCCTGATTTCTCTTTCTGCTGCTTCATTATTGGT  
GTATAGAGATACAACAGACTTCTATGCATTGATTTTTTTTATCCTGCAAC  
CTTCTGAATTTCTGTCTAGCAATTTTTTGGTGAAGCCTTTTGGGTTT  
TCTACATAAAGTGTCTATGTCGTCTGTGAAGAGTGAAAGTTTGACTTTTTT  
CTTGCTGGGTTGTATGTCTTTTATTTCTTTTTTGTGTTGATTGCTGAGG  
CTAGGACTTCCAATACTATGTTGAACAACAATGGTGAGTGTGGACATCCC  
TGTCGTGTTTCTGACCTTAGCACAAAACTCTCAGTTTTTCCCCATTGAG  
GATGATATTAACGTGTTGGTCTTTTATTCATGATGTTGCGGTATGTTCCAT  
TTATCCCTACTTTCTTGAGGGCTTTTATCAAGAAAAGATGCTGTACCTTG  
TCAAATGCTCTTTCTTGCACTCTGTTGAGAGTATCATATGATTCTTAGTCT  
TTCTTTTATTAATGTGGTGTCTGTTGATTGGTTTATGAATATTGAAGCA  
CCCCTGCAGCACAGCAAAGGAAACCATCAACAAAACATAAAGACAATTTA  
TGGAATGAGAGAGGATGTTTGCAAATGACTTAGCAGATAGAGGGCTAGTA  
TCCAAAATCTATGAATAACTTACCAAACCTCAACACCCAGAGAACCACAAA  
TCCAGTCAAAAAATGGGTAGAAGACATGAACAAATAGCTCTCCAAGGAAG  
ACATGCAAATGGCTAACAAACACATGAAAAATGCTCAATTTCACTTGTC  
ATCAGGGAAGTACAAATCAAAAACACAATGAGATACCACCTCACATGGCT  
CAGAATGGCTAAAAATTAACAATTTAGGATAAAAGAGGTATTTGTGAGGAT  
GCAGAGAAATGGGAACTTTTTTTACACTATTGATGAGAATGCAAACCTGGT  
GCAGCCATTCTGGAACACAGTATGGAGGTTCCCTCAGAAAGTTAAAAATAT  
AAGTGCCTATGATCCAGCAATTACGCTACGAGGTTATTTATCCAAAGGA  
TACAGAATTAGTGATTTGAAGGGGCACATGCACCTCAGTGTATATAGCAG  
CAATGCTATAATAGCCAAAATATAGAAAGAGCCTGATGCCTATTGATTGA  
CGAATGGATAAAGAAGATGTCACACACACACACACACACACACACACA  
CACACACGTTGGAATATTACTTAACAATCAAAAAGAATGAAATCTTGCTA  
TTTGCAATGACATGGATGGAACCTGGAGTATATTATGCTATTATGCTAAGT  
GAAATAAGTCAGACAGAGAAAGACAAATACCATATGATACCATATGATTT  
CACTCATGTGAATTTAATAAAACAAAACATAAACATAGGTGAAGGAAAGGA

GAAATAAAATAAGAAAAAAAAAAGGGAGGCCAAACCATAAAAGATTCTTA  
ACTATAGAGAACAAGCTGAGAGTCGTTAGAGGGGTAAGTGGGTGAGGGGC  
ATTAAGAAGGGCACTTGATGTAATGAACACTGGGTGTTATATACAAGTGA  
TGAATCACTAAATTCTACTTCTGAACTATAATACAATATATGCTAATGT  
AAATTTAAATAAAATCTTTTTTTAAAGGTGGAAAATGTGATATAAATCAC  
TGTGATATAAAAAGATTTTGACATTTTGAAACCTAACAAAAGCTACAGAGG  
ATTATGCATAGGGGCTACTTTCAAAAAGAGGTGAACTTAGTGTTGTCAGA  
AAAATTTAGCATGGATAAGGATTCTATTGCTTTATTTATAATTCGCTGAA  
CTATTCATGACTTAAGGAAGATTAAACAAGAGATGCAGTTCACAGGTTCA  
CCCAACATACAGCAAATGGTCTTTCTATGGAAGGTGGGTCTGGGCAATA  
AAGGGAGTATGGTCATCCGAATATGAAAGAAGATAGGAAAGACAAAAATA  
GTGTTTGAGCAAAAATACCTCAGTAGTTACTTCCAAACTCATTCTGACGT  
CAGTCTCTGCATTTCTTACAGCTTCTGTCCAGAGAAGAATGTTTGATGTT  
TGAATAGATTAGGAAAACCTGTATAGTGAAAAACATCTAGCTAAGGACTC  
AATCACTATAGATAGTATAAATGACCTCACCTTAACTTAAAAGATATCAT  
TCAAACTCACTGGAAAAAAAAATCAACCATCCCTGTTTTTATGTAATATGA  
ATGTGATTTGATCACCAAAGTGAATAACACATGGCAAGCTTACAGGTAA  
TTTGACTGGCTTGGGCTATGTGGACATTTTCTAGAGAGGTCCTAAGGTCT  
TCACAAATATAAGCTGTATTTCCCTAAAGCTTCCACAGTATATTTTAAAA  
TAATCCAACAATGATAGCATTTCTGATAAAATACGCCCTTAGTTAAATAA  
AATAGCCCTTTGAAGTTGGGAGAGTGAAGAGGAACAGAAATAATTAATCGC  
ACTATGATAAAGTTCGTAAAGTCATATGGAAATAGAAGCCTGTATGAAATT  
AAGTGGCAAAAGAATAAATTGTAGCATTCCTAGCATATTCAAACCCCTCC  
TCATTAAGTAGCCTATTTAATAGTAGCTAGGAGTGTCTCCAGATGGTGTG  
AAGTATCTAAGGTCCTGGTAGATATGACCCCTGTAATGACAGACCAAGAG  
CTTTTCCTTCATTGCTGTGCACCAAGTTAAACATGCTGATGAAAGATGCAC  
GTGGGGCTATTTGGCCCATCTGCCCTAATATTTTCATCTCCAAGTTCCCTG  
GTTCAAAGTTCGGAAGGCTCATCCCCGACCTATCCAGTGCTAAGTTTGATA  
GCTAAATACAACATTAATTACAGTGCATGTATCAGCATGCTTACCTAATA  
TTTAACAGATAAAGGAACCACTGGCAGAAAGGATACATTTATACTAGCAA  
TAAAGAGTGAAGAAAATAATTTTTTCTTGCTACGACACATATGGTTCC  
ACTTTCATGGTCTGTCTGTCTCCCGGGTTAATGACATCCCACCATATGC  
CCAAGAGCAAGGAGTGAAGAACGGACATGCTGCTCAAACAGATGAAACA  
AGCTGAATCGTGTGTCCCTGGCCATAAAATGCCATTCAAGTGACCCCAT  
AGTTGACATCTGCCCACATATGTGGACATTTGGGGCCAAGTTGCCCATT  
TGTTTCGTTCTGGTCAAAATGTAAATATTATACATAAAAAACATTTACAAG  
TACAGTCTTCTTTATTTTTTAGAGACTGGGGAAATGCTAGGTCAGCTGGG  
TAGGAGTTGTAGCTGTACTTTGTGATACTTTCAATGTGTCTTGATAAATT  
ACATGCTTCACCTCAAAACAGTTATGTCCCTATAATCGACATGAAACTA  
GTATGCAATATTTTTTTTTTCTCGAAGTACAAAACAACCCCTTCGGAAACA  
TAATATAATTTGTGCATGTGAGTAATCCATTCAATCAGTATTTTTGAATC  
CTGGTTGATCCCTGCTTTTATTTGATTGACTCGTTCTACCTTGTGATAGC  
TAGTATTATGCCACAGGGCACTTGGAAATATGATGAGGCTGGAAAGAAGTA  
GAGATATGCAATCTCTTGCTTCTTTCTTTTCAAGTAGAATCTTTTCAGTAGA  
ATTGTTAACCACCACCACCACCAACAAAAATCTATTGAAGTGGTATCA  
CTGGTATTTTCTTTTATGTTTACTCAAATATAGCTATTTCTCTCATTGACA  
AGTAGCAAGATAATCATACTACAAAATCCAGATTTCAAACACTCCTGCTC  
ATTGTGACCTTTGGTTTTTATTTACAAGAGAAATCCCACAAGTATGATAC  
ACAATCTCCGTAATAAAGCTTAATTTACCTTTCTTAATGTCGTTATATGTT  
TATGCCTTTAGCACCCCACTGTTTACAGAAGAAATGTGGTGTTCAGTCAC  
AGGAAGTAAGGATATTGAAAGGAAAATGAACTAGCAAGAAAGATGTGAG  
TTTCTCCTCCCCCTCTAGGACTTCCATCCTGGTTTTTATTTGGGGAATT  
AATTACATAGTGCCAAAGCTGCTTGTACTGCTTCTCTGTGAAAAAACA  
CAATTTTAGAGGAAGATGGCTGGTAATGTGTGATCGTAATGCTATGTCCT  
GAGCATCCCATGGTGATTGATTGAGAATCCACCTTATATGATAGCTGA  
TCCAAGTGTAGGCTCTGGTTGTTTATGTATAAACTAATTTAAATAGTCAC  
AGAAATGATGGGACAATTCAGCTGAAATTGTTTTACTATTAAGTGTATCT  
GATAGAGCTAAACATTCAGTAACAAATGATGAAACAAAAATAAGCTAAT

ATTTACTTTTTTAAGTCTTCGATTATAGAGTTTTGTGGCTTTCTATTGGA  
ATTAGAATAATATCTGCTTTTTTGGCATGATTTATAGGGTCCTGTATCAT  
CTGGCCCCCTGACCACCTTATGTGACACCATTTCCCTCCAGATCCCCCTTGC  
TCATTTCCAGACAGCCACATGGATTTCCCTTAGATTAATTTGCCTGAACCA  
AGCCCATTCCAACCTTGGGGCTTTGCACATGCTTGTCTCTGCCTCCAGTG  
TGTTATGCAGGGCTTATTTCCCTCTCCCTCTCTCAGTCCTTGATTTAGA  
TGTCACTTCCTCAAATAAGCCTTTTTTTTTTTTTTTTTTTTTTTGAGGGAGA  
TGGAGAGAGAGAATCTTAAGCAGGCTCTGTGCCAGTGTTGGGGCTCGATC  
TCACAACCCTGAGATCATGATCTGAGCTGAGATCCAGAGTCAGATACTTA  
ACTGACTGAGCCATCCAGGTGCCTCTCAAATAGGCTTTTCTTAAGGACCT  
ATCAACAGTAGCAACGTACTTGCCCACTACTCTTTGTCTCCTTACCTTGT  
TTCTCCTTAAACTGTTTCTTCATAGTGCTTATCATTTTCTGACATATATT  
ACAGCTTTATTTGCATATTCTGTTTGTATTAAGAACAAGTACCATAAAG  
GAGTTTTGTTTGTGGTCTTATTAGCATTATATCACATGTACTGTAAATTT  
ACCTCACTTTTTAATAGTTGATTGGCTTTTTTATACATCCTTCAATAAATAG  
TTTCACCTGTTATAAGATAGGAATGTTATATTTTTTAAAGATTTTATTTAT  
TTATTCATGAGAGATATACAGAGAGAAGCAGAGACATAGAGAGAGGGAGA  
AGCAGTTTCCCTGATGCGGGACTCAACCTCAGGACCTGGGATTATGACC  
TGAGCCAAAACCAGAGACACTCAGCCACTGAGCCACCCAAATGCCCAGAT  
AGAAAATGTTCTGGTTGTCCAAAAGTATCACCTTTGAAAGCAAGGTCACCTA  
TATGATCTTTTCATATATTAATTTCTTACATCACTAAATGCATAGGAGAT  
CTAGTGTAAGAGATTATTGCATAAGCGATTATTATTAAGGTATTTTTTAAA  
ACTATATTTATTCCTTAATTTGAAAAAGTATTAAATATTTACTATATGTA  
AGACATTATGTAAGTACTTTGATTCTTCAAATTAACCTTTTAGGGTA  
GATCCTATTGTTACTAGCATTTTATGAAAGAAGAAATTAATAAAAAGAGA  
GCTACGTGATCATGATATGAAGATGGTCGAGGGAGGATTTTTTTATTTTA  
TTTTATTTTATTTTATTTTATTTTATTTTATTTTATTCATTTTATTTTAT  
TTCATTTTATTCATTTTATTTTATTTTATTTTATTTTGGAGGGAGGATTTTAAA  
ATACAATTAACAAGGGTAATGATTTAGGCAGGAGTGGGGTGGTTTGAAAC  
ACAGGGTTAGTTGGCGCTGACATTCAATGGGAAGAAGGAAGGGCCTCTCT  
TTCACAGTAACACCAAAGAAGGAGAAAGTACTACGTGTGGTTGCAGTTTG  
CTTGGTCATAAGGCATAGCGGATTTCTTTCCTAGGAGAAGGCAATGGTAT  
CTTCTCAGAGCCAGAACAGATGTTTGAGGAACACAGAGAAGGTTTATGAA  
AGACTACCAGGGAATAAGAAGGACGACCAGGCTAGGGAAAGACTGCTTAG  
CAGCACTGAGCATCCATATGAGACCGGATGTTAAATTTTCGAGGGACCCA  
GTCTATACATATGTGTGATTAATTCAGTAGTTCTTGGCAGCCCAGATGT  
ACACAAGAAGAATATCGACCATTGGATTCTCTAGAGATGGGGTTTCCAT  
GATGAGTGAAGCAGAGGAAAATGAGGAAAGGGGGTTGGGGATCCTGGTAA  
GCAGTAAAGGGTCTCAAGCAGGAAGAAGGAAAAGAAGGCAGATGCTGAG  
AAGTAGAAGGAATCAGAAGGCTAAGAACCAGAGCACTGTTGTCCAATGAG  
ACTTCTTTTCATGATGGCAATGCCATAGATTTGTTGTCCATTATGACAGC  
TGCTAGTGTGCGTAGCTATTTACACTTGAAATCTGGCTAGCGAGACTGA  
AACTGAATTTTTAATTCTATTTATTTTTTATGAATTTAAATCTAAATAG  
GTACACTTAGTGACTATCATCCTGGACAGCTTAAGACTAGAGATCCTCAT  
GAAGATGAAGAACTAGTATATGAGGACAACTAGTGGAGAGGCAGGAGAA  
TGGGAGACTGTTGAGAAAGTGATGCATAAACAGTGTTGTTATGCCCAAAC  
ATCTGTTCCCCACCTCTTTTTTAAGAACCCTCAATTTTTATTTTGATACCT  
ACACCTCCCCCATGCAGCCTATACCTGGTAGATAGAGCTAATTCTACCCC  
TAGTTCTAGGGGTTTAGATATATATCTTAGACTTCTGCTAATCAGTTCAT  
AGTAATCTAATCAAAAGCCAATGTTCCCTAGTTCTGGGTTGAACATGGGAC  
CCAGTGGGAATCAGTGAGAGTGAAGAGGACCTTTTCTGGAAATTTTCAGGG  
AAGACAGCTATACCACTCTGAATGCACTCGGTCTCTGGAAATTTTCAGCGA  
AGAGACTTTCTCTCTCTTCTGCGGTATAGCACACAGTGTGAAATCTAGAA  
CAATACATATTTTGCCACCTTGAGCATAACAGGGTGGGAAGAAACCGGGTC  
CAGTAAAACCATGTCAAGTCACAGTATCAGTCTGGCCCTAAGGTCTGTCC  
TCTGTATGGACTTTTCTATTTTCATAAACCAATAAATCCCCTTTACAGCTT  
AAATCAGTTGTTACCTGCAATATACAGAGGCTTAACTGGTATGAGGGGGT  
GTGTCTTAATTTACAATTTTCAGAGATGTAAGAGATCCAGGAGTTGAAAGA

TTAGTTGTGGTATGGAGTGATGGTGGAGAAGAGTTGCAGGTCAATGGAGA  
TCAAGAGGTCAAGCATTTTGAGAGGCCTGAATATTAAAGGCTGCTTTTACC  
ATTCATGATGGTAGCAGGATTTGGGGTGAAGCAGAACCACAAATTGGGTG  
ACAGATCTTTAGAGAAGTAAGCATTGACTGCTCAGTGAGCATTGCAATGA  
AGTGATGTAGGCATTGCTTAATGGCGTCCAGCTTTCTTCACTCCCTGTTT  
CCTCTCTCCTTTCTTAATGTGTGTTTTCAAATGATTTAAGAGAGCATT  
AAATAAATATATATATAAATTATAAATAAATATATATATACATTATAATT  
ATGTATTTTATACCTATATCTATATCTATATATAGCAGTGTAAGGAAAT  
AAAGAGAAGCACACTGAAAATGCAAGTAAAAAGAATATAAATCATTTAA  
GGTTGGGAAGATAAGACAAAGCCAGAGGTAGTAAGGTCAATGCACAAAAT  
ACACTAAGACGTCCAGCACTGTTGCTGGAGCTAACCTACAGTTTGGCTCT  
GAGTTTTCTATTACGCATCATCTAGTCTCTCTATTTTATCTCTATATAT  
GAAGCTTTTAGAAAGTTTTGGCAGCCGTACCTGTTAAGCTCTCTTTTAATT  
ATTAGTTTACATTATGTGCCCAAGGTCACAGAGCTCGTAATAAAGCCCAA  
TTCTTGAAGAAAAAAGCTCCAAATTTCTAGTCCTGCAGGCTTCCCACTA  
GACCACATTGCATCTTGAACACAGAGTAATTTTCGCGGTAGACATCCTGGA  
CTGCAGGGTCACAGGAAAAACCAAGAGCTACTGGGGTATTTTTGTTCGTG  
ACTCTGAGCCCTGGTGACTGAGGATGGAAAAGAATCTGACAGACAGACCA  
GGCCCCGTGATGGACCATGTCTGGACAGCCTGACCTAGCAGAGGAAGTACT  
CCGGCTGTGATCTCCCGGGAGGCCCTGTGCTAAGGTAGCAAATGCTCTA  
CATGTCAGGATTAAGGTGGTTTGGCAGAGGCACGGGGTGTGTGTGTGTGT  
GTGGGGGGGTGGAATGCAGTGCGCCAGCCCCCGCCAGCCCTGGCAGGTTT  
GTGCCTTTGGTGGCTTGAAAGATAAATATCTGGCCACATCCTGTGCATGA  
GCAGTCTCTTTGCCCCTGCCTCAGTTCACCTCCCTGCTTGGACTATCTG  
AAACTCTAAGATCCTTGTAATAATCCAACCTCCTGTTTTACTCCAGAACTCA  
GAATCTGCGTGAGGGAGACATCTCACTGCAGACTGCTTCGAATGCCAGGA  
ATCAAAGCCACCATTTGCCTTCTTGTGTATTTCATGGAGGTATTCTAACAC  
TCAAGGGAGGAGGTGTTTTGTGATGGAGGCTTCTGTGTAGATGCTGGGT  
TCCTGAGGTGTAGCCAAGGTTTTTTGAAGGAAGCTGGAGAAAAAAACAC  
AAACGTGTGGCGTTTCCTCCTGGTCATAGACATCCTCATTAGGAACCTCT  
GGATGGAAAACTATGGTGGTTCAGTGCAATGGTAGCATTTCTTTAGATA  
GCTGTTCTTAAACCTCACTGGGTTTTCTAATTCATTTGGTTGGTGCAGTG  
GAGTACCCGTCCACAGGTGAATGCATATGTGCTCACGCCACATGACTTC  
ACATGACATTTAGAGGGATGGGACAAGCCCCCTAAGAACTCGCCCTTG  
GATCACCAAAGGAAGAATTTAGTCCTGTGTGGCTATTTTGGACAGCTTG  
AGTCCACTAGAGGTTCTAAAAATAAATTGTTAAAAATGGCACTGACCTTC  
TAAGTGTCAGAGACTTAGGTTTCATGTCCCAACTCCATCACTTACAAGCT  
GTGTGACGTTGGGCTCTCCATCAGTTTCCTTGGTGTAACATGGATGGT  
AATATCTGCCCTTCCTATTTAATAGAACTTGAGGATCAAGTGAGAAAGAT  
TCCAGATTTTCAGGAAACGAGATCGGACCTAATGGATTTGTGAAGTTCCT  
CATTGTACACATTTCTTGTCTTGTGCTATCTCAGTCTCCTCAGGAAAC  
CCATAACCAAGTGCCGAATGGACTTCCTTCTTCTTGTAACTGGGTGAGCT  
TCCAGTAAACGTGGCAGGCTCCAACCCCTGCTTGCCAATTTCTGCCACCT  
TTATTCCATGTGGCCCCAAAGTCTGTTGCTAGACTCTTGTTTTAAAAAGGG  
ACCACTTGGAGATAAAAAATCAGAGATGTTTTGTTAATGATCAGATAGTGA  
ATTAGGTTTCAGCATTAAATAATTGGTTATTTATAAAGTATTTATAAAGGCG  
TGTATCAGTGCTAAGTGATATTTGTGTCTTGTCCATCTTTCCCTTCCT  
GACATAACCACATAAAAGCAGACAGTGCAACAAAGTGGCTCTTCTTGAAC  
CAGGTGAAGTAGCAGACATCTTTAATCCCTCCCTAAATCACTGCACATAG  
GTATGGGCCTGGGTACAGACACAGAGCTGTCTGCTCATCATATAGGAC  
CTTACAATTAATGCACATTGTTCTATAACCTCCTACAGAAGAATCTCATC  
CCCACCATCTCATTAGGACCATATTTAAAAACGAGGGGAGGGTTTAGTTG  
ATGTATTTTAAAAAATAAAATCATATATAACAATGATTCTTACTATTAAG  
TAGGCATGGCAATGCTTTATATCTTTATCTTGCCCTTAAAGCTTTTTATA  
TGCATTATTCTGTAGGTTGCCACGTCCAATACGAGATATGTTGGAAGGCC  
TGATGGGCTTAGAGTGGGTGAACAGAAGCCAGCCTGACAGAAAGGGCAGA  
GGGAAGCGAAGGCTCCCTCCACTCCTGTTAGAGATGACGTGTTGTCACCC  
CACAAGTCAACGGGCCAAGGCCCTCCATCCCCAAGATGAGAGCTGCCCT

CGTAGGGAGTCAGTGATTTATGGCATCCTTACTGCAGGGATGAAAAGTGA  
CAGGAGGAGCTCAGGGATTTACAGTCTAGACAGGGCGATGTCCGAGGAAG  
CCGGTGCTCTCCTCCAATTAATCTGAGAACGCCTTGGTAAATTTTGTCT  
TTTTTTGTACCCTGTGAGGAAATGAGGAGTTTGTTTTTGCCTGTGACAAA  
ACCCATAACCTTTAGGATATTATTGAATGAGCACTCCTGGATTAATTTTA  
GTTCCCATCTCCAGCCTGGGGCTCACTTCTAATTTCCATCCTACTGAGGA  
AGAGCCGGAGAGGCCTAAAGAAGTCAAAACAGGAACGCGTTAGATATTGG  
TCACAGTGTGATCTTGCTGAGAGCTCACCAAACCTCTCTGACGTATGCCC  
TTGTGTGCCCTGGAGACTTCCACTCCTGGCCTGTGGCCAACAGGGGCACG  
AGGACAGAAGAATCACTGCTTTATCAATTGTCCTCAGAAGCTATTCCCTCG  
TGCCCTATACCATACAGGCCTTCACTCTGATTAGTCACTTTAGAAATTTT  
ATTAAATCTTTTATTAAATCTTTAACAGCCATTACTGGAGGAGCCAAGTT  
TTGAGAGCAGAAGGTTATTATTTTTTTTTTCCATGCACGAGAAGGGGGAAA  
ATGTATCTTATGCAGTAAAAGTGAAGAAATCTGAGGAGCCCCATTTAAGT  
GTTTTCTCTCTTTTCTCTGGAGCCCCCATCTCTTCCCTCCATGGGCAGCAG  
TAATACCATGACGATGGGGCCAGAAATATTTAAAAACATTTTAAAGTTAC  
CACCGAAAGGAGAAAACGGTACATTTACACTCGTCTTTCTCCACTTAATG  
GCATTACCAGAGATGCCTTGTCCCCCTTGGGCCATAAAATTGAGACATCAC  
TCAACAGTTGTCCTGGCAGATTTCCCCCAGAAAGGCCACTTATGAAGTGA  
CTAATCGTATTGGAGCCTAATTTACTGAACATTGAAAGCAATTGGGTTGG  
GGGAGATTAGAAGACTATGAACCTGGGATATGAGCCATTATGTCCCCACA  
TTGAGGACTCGAGTCTAGCTCATCCTTGCATCCTCTCCAAGGAGATGAGG  
CCTTTTTCCCTTTCCCATCAGACTGCAGAAATCACTGCCTGGTTGGGGAA  
AGCCACCACATTAGGAGCTTTAGGCTAAGACTTGCAAAAGCCGTGGTCTT  
TCTGGTCTGGAATGGACATTAACTTTTCCCTGGGCAGCTTTAGTAAGAGC  
ACCGGGGTACGCTTGAGGTCAGAGAGGAAATGAAGATTATAAGTGTAATG  
TAATATTCAATTTCCCCAAATTTGGATAACCCAGTGACTTAAATCAGGGAG  
ACCTTAATTCTAAACCCTACACGGAGCCTCCTCATATTTGAGAGCTCACC  
TCCTGAACCACCTCTTTCCCTATGTACTTTTTGCTCCTGGAAAGGAGCT  
TGGCTATAGGGAAAGCTATTAACATCCACGTTTCTCTGGAAGTTTATGTC  
ATAAAGTGAAGGGCCTGACCCTCTTTGGAAGAGGGGAGCCGACGACGGGA  
CTTTCTGGAGAGGTGTGGACGTCACCTCTCATCTTCTCCCACACCAAGTAG  
TAATCCTACCATATGTTCACTCCCCTATGTGCCAGTATGTTCTCAACCTC  
CACCCCCCCCCATTCCCTCTAGTGCTGTTTTTGGTCAAATGGCAGCTATA  
CAGTAACCCAATCATGATTTGCGCAAGCTGTATATCCTTATTTGATGATT  
ACATGCATGGCAGCGTTTTATTTGTTGCAACATTCTTGGCAATACTCTAG  
GTTGGGCCAGGTGGGGGATAGCCACTCACAGCTTCAGAACCAAGCAACG  
TAAATAAAAGGAACTCCATTGAAGAGAGCATCCCCTGGTCGCCATGCCT  
TCCACCTGAGAGGCTCTAACAGTATTGATTGAGCTTCAGCTGACTAGAGC  
ATCAGTATATCAATATCACAGAATTATTCAGCAAGTCTTTGACACCATCT  
CTTCGGGAATGGACTGCTCTTAATTTCTTGCCACTGGATACTCAGTTTG  
AGTTGAGGGAGAGTGCATATGTTCTGTGAGTGAATTCAGCTACAAAGA  
AGGGAGAAAAGAAGTGGGGCGTGGGGGAGAGGGAACAGCTAATGTGCCAG  
AGTGTCTATGAGTGTAAGTCACGTACTTGAGTGTTCTGCTGCCAAGAAG  
AATTAAAACATGAGATGCCTTTATGCAGAAGTGACCACATTATGCAAGA  
CAACATAACAACACTCCTGTGCCAGTATTA AAAAGGTTCTTTGAATATGA  
AGTTCCAATAAAATGACTAATCCCAAACGAAGAAAATCTTAAGTGGTTC  
TGAAGAACTCGATTGATTGTGTGAGCATTGTGGCCTCTGCTTACCTACCT  
CGATTAAAATTCTTAACCCAGTTTCTCTAAAGGCATTTCCAAAGGCTAAG  
AAAGTCCATACCAAGTTTTCATTCCTATGTAGAATTA AAAAGATACTTAC  
AATGATGATAAAAAATCGAAGTTAATATTGTATCCCCAAACAGAAGAGCCC  
AGAGAATTAGATAAATACTGCTTGGTGGGCAGTGGGAAGAAGGGAGTGT  
TTCTACCCATCTGAAACAATTTTATTTTATTTTATTTTATTTTATTTTAT  
TTTATTTTATTTTAGCAAAAGCAGTTGTGAAAGATATGCTAATGAGTAAA  
TTCTTATGAAGCTTAGAGTTTACCAAAGAGATACAAATGTCTACAAAGAA  
TGATAGGGCATGACTGAGGAGTTCATCTACTGTGAGAGCACAGAAAAGAG  
AAAGCTCAGAGCATGGTTTAGTGACATTGATTTGACTTCCAATAGTCAC  
CCCATTCTGACCCAAAATTAATTTCAAATGTCAACAAATACTGACTGTT

GACGCTGAAGCTAAATCTACCTGTCATGTGATTGATCGATCATGAGGCTG  
TTCAGAGCATGGGCTCTGTGGGGTTTTAGTTTGGTTTCTAAGTTCCCGTG  
TGACCATGGACTATTTATTTTACCTCGTATTGCCTCAGTTTCCCCATCTC  
TAAAGTGGGGATGATGACAGTGCCTATCCTGCAGGGTTGTTCTGAGGGTT  
AAAAGAGTTTATATAGAAAAGGGTTTGGGAAAACAGATGTTCAACGGACT  
AGTTATTATTGGAGTATGATTAGCTCAACGGAATGTATAAAGAGTAATTT  
TCTACTTTGGGTAAACAAGAGAATAGGAACGACAACCAAACCCCGTAAAT  
CAACCAAGGTTGATTCTGAATATTATCAGATCTGAAAAGGGTCTAGAGCA  
TATACGTTGCTGAAATATGAATTTTTTTTGCAGTGTATGAGCCCAAGAAGC  
CAGGGAAATGTCAGTGTGGGATTTGCTCTTGTCTAAGTGATAGACCAGTA  
GCTAAATTATTTTTTTTTTAAAAAGGCCCTTCTCTCTCTCCTTCTCACCC  
CCTTCATTCCCCCTCCTTCCTTATTTTCTAATTGAGGACAGGCTTTTCGA  
GGGACTATAGTTAGCTAACAGACATGCAAACAAGAGGTTGTTATACAGAA  
TGAGAAAAACAATATTTTCTTCTAGGGTGGGCACAACAGCAGGAGTAGAG  
TGAAGTAGAGTTTGGGCAGGACTTGCCCTAGGGGGAATGTTTGAGCTGAG  
TCTCAAATGATGAGGAAGCATTGAACCTTCTGTGAAAAAGGTGCAGAAAT  
TTCGATTAGAATTGCCACACTTGTCGAATGTGCTGATATCGATTCAAACA  
TCAGGCTCTGCTCTTGTATGAAAATGTGACTTTATCATAATCACCCCTGGA  
TGAGGGGGGAAAAAAAAAAGGAAAAGATCCCAAGCATTCTAGATAAGTAGG  
ATTGAAGTGATGGCACAGTTCATTCTCACATTTTAATTCAAAGAGAAATG  
GTGTGAGAGAATGTTCTTTGGGAATTTCAAGGCAAACCTGGAATGCAACAT  
ATTCTCTGTTTCACCTACTATCAATTTCTTAACTTCATCTTTGTATTTT  
ATCTGCAGAAGGGCTTTTATTTTTTAAAGGGTTATGGTCCCTGTTGGAGA  
TTTATAAGCTGGAAAGAGTTAGGTCCTCTCCAAAACAGACATGAAGAGTT  
GAAGTATTGAGGGCGGATTGAGTTTAAGTGCTTTTAGTGTTTATTTGAGT  
AAAACACGTCCACTTTTCGTGCGTTTACCTAATGGCATTTCAGAGAAAGA  
GTAGAAAGTTTATAGCGGAGAGAAATCTTACTTATTGAGGGATTTGTGTG  
ACAGGCAGTCACTGAATCAGACAAAATAAATTAACAAAAATTTAATTAGC  
TTGTATCATCTTGTCAAAACTGACAATAAAACATGGAGAAAAGATCAT  
GTTTTCTCCAGAGAATGGTTCTTTTTTTTTTCTTTTTTTTCTTTTTTT  
CGTCTGAAGAGAACTTTGACTTCTACAACATTTTATAGATTTACATGG  
ACTTCTGTTTCCTCCATTTTCGGGAAGATTCAAGAGTTAAGTCACAAATGG  
CCAGGCGGCTTTCTCTCCACTCCACATCCAAGAGCTAGAGAGCCACTTGC  
CTACTCCTGTGCGTTTCAGCTGCACAGAATGCTTGCTCTCTGACCCACTC  
TCTTTTCTGTAGGGTTTAGGAAGAAGAACACAAGGGCTTTCACCAGGTCA  
AGCTCTGTCCAGCAACTTCCATATTCTTTCTTGTGGGTACAGTGAGCCCA  
CGGGAGAGTATCAGCAAGATGATTCCAAAGTAAGTCATTGCAACCTAGCA  
ATCGCTGGACTTTGCAATTGGCCATCCTTGGGACCATTAGGGGAGCTGT  
TCCCTTCTCTTGGCCCTTCCCTCTCCCATTGCTGCTGCCTTACCAGCAGA  
CTTCGGGACTACCTACAGGAAGTGGAGCTGTGAAAGCCCACAGTGAGTTT  
CAGACACAAAGTTTTTATATTATAGGAATTACCACAGCCGTGGCACCAC  
CAGCACCCAGCTGCTCCAGGGCCTCACCAAACCCCTACAAGGAAGAGCTT  
CTATGTGGCCAACGACTCTTACCTACCCCTTCTCTTCCAGATCTCCTGCC  
TCTACTTCTCTACTTGTCCCCACATAAAACATTCCCATCTCTCTCTTAG  
GTCCTTGATTCCAGCAGAGCACCATATATAGCAAGCAAACAGAAATAGAC  
AGAGACCTGCTTATAGTGGGGGCGAGTTAGCTCTTTGTCCAGAGTGAAGAT  
GACATCCTAGAGCTTGTAGTTGGAATTTTATTTTGTCTTATTTTTTTAAA  
AAGATTTTATTTATTTATACATGAGAGACCCTAAGAGAGAGGCAGAGACA  
TAAGCAGGCTTCTGACGGGACCCCGATGAGGCACCTCGATCCCAGGACCC  
TGGGATCAGGATCTGAGCAAAGGCAGACGCTCAACCGCTGAGCCACCCA  
GCTGCCCCGTAGTTGAAATTTTAAAAATGCATTTTCTTTTAGGAAAATC  
ACATGACATTTCTCTAGGCCCTTGGTCTTCCCGATAAACAAACATATATA  
ACTAATCTAGAAGTCATTCTTTGAAACAGAGTGAAGCAAGAAATTTAAAT  
GTTTCTTTTCATAAAAAACAAACCTATATGTAGAAGAAGACATGTGCTGGA  
ATATTTTTTCCAAATACCCAGGCACACAGACAAAGGGTGAGCCGTTTGGCT  
TAAAGAATATCATGGCAGTAATAATCAGCATTTGCAAATTGCTTGCGTAG  
TATTAGGCATTTCTCAGTGTTTTACATAGAGAGCAGTCTTTGGGGCATAA  
GTCCATTATCCTTATTTTACAGAGGAGGCAAAAGGAGTTTAGAGCTCTT

CAGTAACTTTTCCAAAGTCACCCAGTTAGAAAGCGGTAGAATGTAGATAC  
TTCTAATTCCTATCCTACCTTCCTCTCAGTTCTTGAATTGATCATA  
TATGGTATAATCTAGATACAGAAGTGAGACACTTAGGAAGAACTGCACTG  
CTGGATTCCCCCATCTTCTACAGGAAAAAAAAAATGCATTCTTTAATCA  
CTCCAATAATCGGTGGTTCTCTACCGAGGATGTGTTTGTACCCCACTGC  
TGCCCCCAGGGGACATTTGGCAAGGTCTGGAGAAGTCTGGGTTGTCACAA  
ATGCTTCAGGGGTGCTACTGACATCTACTGGGTAGAGGCCATGTATGCTG  
TTAGACATTCTTCAATGCACAGGACAGCCTTACACAGCAAAGGACTATGT  
GATCCAAGTATCAACAGCAATGAGATTTTGAGACCCTGATGTAAGTGGAA  
GTATTACATAGTATTCAAAATATATAAAACCTAAAGAAAGCATTTCAGGTT  
CTAAATGAGTTACTTATTATTATATCCTTGCCTATTTTCTTTGTTATACT  
AAATTCATCACTTTATGTGTTTTCTTATTGTATATACAGTTTGGCACCAA  
CACACCGGTTAGTAAGCTTTGCCCCCAAGAGATACTATCAACTCTTCGG  
GGAAAGGCCCGAACATTCTATCTACTGGACTTACAATGGACACAAGATCT  
TGAGTCTTGTGTCCATTTTAAGTCCAATAGAGTCTCAGAAGATCCATAAT  
CAGCACTTCTGGTGGGAAAACTTATTTCCAATCAGTGGGAAAACAGTCAT  
GGTTTATAAGCTGTCAAGGGGATTTTGGAAACCATGCCTTTCGGCAAATA  
CTACTGAGTAGAAAGGCATCTCATTTATATGGTGGGGAGCGGGCTTTAGA  
GGAGGGTAAGATGTGTGATTGGGGGGATGCATGTGACTTTTTCTAGCAGA  
AGTCCCAGAAACACAGAAAGTATTATATTTAATAAAATTATCGATTTTGTA  
CACAGTAGTAATAATCTCTAGCCTAAGAATGTACCTAGAGTATGTATTTT  
CTCTAACAAAATGACAGAGGCTCTCTCCCCTTTCTCTTCTCTCACTATT  
TTCTTTTTCTCTTTCTCTCCTTTATGGAGAAATACTGAGTGAACATTTAC  
TTAGCAATTTGGAGTTCATGACAAAACCTTTCAAAAACTGTACTGGGCAG  
AGAGTCAAAACCTACATTTGGTGGCAAGGTTTAAAGTGCCCAATGAAC  
AGGAGTCTGTATAGTTTTCTTTCCCTCACTGGGTGGCTTTAATACCATT  
TCTAGAAACAAAAGGATGAATATGTGGGATATGCTAGGAGAACCTGTCTG  
GGAGAATTTTGCTCCCAGATTTTATTAGAATTTCCATTATTTTTGGGCAG  
TCAGCATTTCCATTCTTTAGAGACACCCCCATGTGGGTGGTGATTACATG  
GAAAAACAGTAGCAAATGCCAAATAAATTCAAAACTCTGGGTATATTTCTA  
GACAGTGATCGCTGCTTCAGGGATTTCCCTTTCTCAGCTTTAATCCAAATT  
TTCATGCTGAGCAAGAGAGGTGGCCTTTTCATTTCTGTTCTTGTTTTGT  
TGATGTCTTGACTCTCTTGCTTACCTGCATGTGTTTTATTTACCTTGTTG  
ATTAGCCATGGAGAACATTTAGCCCTTGGTTGTTTTTATTTTATATCTCT  
ATACATCTATGTATGTATGTATCTGGCGTTATCATTTGAAATTTGTATGT  
CCTAGAAATAACAAATTGATTTGAAGCAGACCCAGGTAGCCAGTCCCCA  
GACAAAACCTTTGAAGAGTGTCAAGTTTCCAAATTCCTTTTTCATGCTTG  
CCACTCCATTCCAGAGGTCTTGAGGCTGTTGCGATCTTGAGCTACAACG  
CATCCTTTATCCAGATTTCTCAACTGATAGTTGAGGAACTGAGGTCTAG  
ACGCTGTGCAAGGTAGCAAGAAACCAGCAATAGGACTGACATCAAATTC  
CTGTGCCCTGGATCCTCTCTGAGCTTTTAGAGTAGTTGGGTGATGGCTGT  
TTCTTAGGGATGCATCTGCAAAAGTGCATTCTTTAGGTAAGAGGTCTTCC  
CAAATCTAAGAGGTCTCCCTAATCTAAATACCAGGACTCTGGTAAATGA  
CTTCTGGCCCCCTTTCCCCCACTGCAGAGTTCTCTCTTCTTAATTGATCAG  
CTCTTGGCTGCTGATAAACAACAGCCTGTAGGAATTCACCTCTCTTTACA  
AATCTCATCGATTCACTGAACACTCTATTTGTGTTTTGTGCCAGGCACTA  
ACAATTAATCAATGAACAAAACATACAGGTTCTCTGGACTTCATGGAGTT  
TACCTTTTGAGCTTGCTTTAAAGGATACCAGAGTCCATGTGACTGCCTCT  
AGCACGGTGGCATTATTTTACCTTTAAAAAAAATCCTCACAGTAGTTT  
ATGTGAGTGATACATGCCTCCTTCGTTGAGTGGTTCCACACAGAGTAGC  
TGATTTCTGGTTAATTGAGGTTTTATGAAATATAAGATGTGACTATGGA  
ATATTAGTATTAATTTAAATAATAATTTGGAAATCTTTCCATTTTTTTT  
TAAAAAGATCTCGTGATGGTATAAAAGAGAAATGATTCTGTGACAACTCT  
AACTTAATTACTCAGCATTTGAGTGAAAGAACAATCTCTGAAGTAAGTGG  
GGAGGAAACAGTGGAATGTGTGGGTGCGGGGAGAGGGCTGTGCCAACAT  
TGCCATCAACACATTAATTCACATTACACTAGCTTTCAAGGACAAGCTCC  
AGAATCCTATTCAAAAGTCGATGTCACCAAATACGAGAGGAAATGTGCTC  
TCAGCCTAGCTGCATTATCAGCTTTTTTATACCTTTAACCTGCCAGATTTA

ATCGAAGACTAAATATAAAGACTGTATAAAGACTGGATGCGAAGAAAGAT  
AGAGACAGAGAGGAGAGAATGAGGGAGAGCGAGAGCAGGAGAGGGGTCTA  
TTTTTCAGGTGGCTGTTTAATTTCAAGAGATAGGAAAATGTAACCTACCACA  
TGGTACAAAGACTGCAAAGATGCCTACCAGCCAGCACAAGTTGAACGTTG  
GAAATAGGTCTGTTTTCTTCTATCAGCCATCACAGACCAGGTGAAGGTAG  
CCAAAGGTCCAAGAAATGTGACTACACCCAAACTCTTATCTAATAAGCAA  
ACTTCTTTGCCTCTTTCTTTCCCTTCCTTCCTCCTCCCTCTCCTCTCCAC  
TCCTCCCTTCCCCTCCTCTCTCCCCTCTTCTTCTCTCCTCTCTTCCCTTC  
CCCTCTCCTCTCTTCCCCTCCCCTCTCCTCTTATCTCTTCTCATCTTCTC  
TTCTCTTGTCAAATATAACTTATCTTGCTTTAGGCACCTCCATCTTCAAG  
GAGGGGATCAGGAAATCGGTTACAAAATCGAACTTCATGTTTGTGGACCA  
TAGAGAAACAGACCTACTTTAGCCCCAAATTGATTGTAAGAAAATAGATG  
TTTTCTGTTTTGTTTCAGATTTTCTGCTGCTATCAAGAATAAATATATCT  
CGTCGATGTGTTTTATCTACATCTATCTTGTATTTAAAGTGAACAAAATT  
ATTTCAACTTTGAGCTTTTTTCAAAAATCTCTGGCTCATAATTAGCAGGCC  
ACCCTGTGTCATATAAGCTAGCTGTTTTATCGCGTATCTGAGGTGGAAAA  
TAAAGATGCAGGAGGAAGGGGTGAAGAGAATGAATATAATCTACCCACA  
CCCTACACGATGCGGAAGCCACACACCGCACTCACTGTAAAACCTCAGTGG  
AATGTTAATCTCTCTGATAAGGTCTTTATAAATTCTAAAATGGACCAAGG  
TCTCCTTAATAACAAAAGTATCTCAAAATGCCTCTAATACCATGTATCTG  
CATGTGTCTCCAGCTGCTTCTGGTCCTGGATGCAACATAGTTGCCTTTGT  
GAGCCCCTGCTCTCTCAAGGCTGTTTCTGCAGAGCAAAGCACACACCATT  
CAGAAGGATCCCACCTCAACACCTCAAGAGATTCCAGAATTTGGGGGCAG  
GTGTTGCTTTTACCATCTAGTACATTTTAAATAACTCCAAAGAATAATA  
GTGTATTATACGTACCCAGATATCTACTGTTTAGCTGCGCTTCCTTCTTG  
ATGTTTTAAGACAGCCCCCCCCCCCCACCTCCCCGGAGACTTCTGGCCCC  
TTTTCTAGCAACTTTTTTGGTACAGTTCACCTCTCAGGGAGGGTAAATGCC  
TGATAAAATGTGTTCACTTGGGGTATTTGAAGATGTAAGGACAGGAATCC  
AGGTGAATCAGGTTTTCTTCACTTGGTAGAAATGTGATCTTATTATCTCC  
ACAGTCATTTTTACTATGTTTATTCAAACCTTGTTTATTTGCTTGTTTTTC  
TTTTCCAGATTAAAATAAAGGAAAAGATCCATTTCTAGACCACCACCTGG  
CACTTGATAAATATTTGCTAAATGAGTGAATATATGAATGATATGTAAAA  
TAGCCTTAATTTTTGGTGACAATAGGTAGTTTACCCAAGGTTTATGGATT  
GTTTTCCCAGTCACTTTTTATTTTCCGTAATAGTGTCCGTAGTGAAGTGGG  
AAAATGGAAAAGAACCCTTATCCTACCATTTTTCTCTCAGATGGCTCATT  
TGCTAAATAATAAAGAATAAGCTTTAAGACGTAGTAAACAGTTCAAAGGA  
ACATTGATTAATGTTTTTGGCAATTTGCCAGATTTTAAATCACATTTTCC  
TTCTTTTATCAATAAAATAATCATATAAAATATGTTTCTAAATGTATTCA  
CTATTTTCCACCATGTTTGGGCAATTGAAAATTTAGAAAGTAATTAGATA  
TCAAGTCAAATGTCTGAATACGCTTATGTAATTGGAGGAGTTAACAATTC  
AAATACGGCTCTCAGAGTTCTGAATATAATAAATAATGCTCTGGGGGAAA  
AACACACTTAAAACCTTAATTATAGAAGTGGCTTATATCACTTTTAAAC  
ATCTAAGATTAAAATATTAATATTAATAACAAAACATTTGCTTTAATTTTC  
ACAGGAAATGGTCACTAGAAATGTTATGAACATTTCAAATTTTTATAAATC  
ACTTCTCTTTATTTTCTTTTGGTTTCAGGGATTGATGGTCAGTTTTTTATG  
TCAACTTTGAATAACATAATGTGATGGTCAGTTTTGTACAGTCTTCAGTT  
ATTCAACTGCACACTCTTCCAGGTGTTGCTATGAAGGTATTTTATAGATA  
TATGATTAAACCCATAAAGCAGTTGACTTTAAGCAAGAGAGATTATCCTA  
GATTATCTGGGTGAGCCTGATTCAATCAATTGAAAGTCCTTTAGAATGGA  
ACTGACATCTTCCAGAAGAACAATAAATTGTACCTGTGGACTATAGCATC  
AGCTTGATCCTGAGAGTTTTCAGCCCTGCCCTTCCTGATGGCCTCCCCTACT  
GATTTCAAGACTTGCCCTTACTTGCCCTCATAATTGTGCGAGCTAATTCCTT  
GCAATGAGACCTTAATGTGTACCTTCAGTGGGTATTTTCTGAAATCTTG  
ACTGATACACAGGAAGGATATAAAGATGCCCCATTGTACCTTCTAGTTAA  
TTTTGAATGAATAGTGAATGTTTTCTTTTAACTCTAAATTACTCTATTCC  
TAACAGTCAAAGATATGTAATCATTTCTTAAAAAGCACTTCAGTTAAAAG  
GAACCCTAGAGTTAATTCCACAGCAACATGAATAATTTTCCCTTAAATTA  
TTTGTATTCTAAGTTTCAATTTACTACAAGTATATGAGTCATCTCTTCTG

CATAGCTTATTACCCCTAAATTTTGTCACTGGAACCAACACACATTTATT  
ATCTCACAATTTCTGTGGGTCAGGAATCCAGGCATAGACAGCTGGGTTCT  
GTGCTTTGGATTTCATGGGCTGTAGTTCAACTGTCAGTGGGGGCTGTGGTC  
TTATCTCAAGGCTAAACTGGGGAATGGTCCACTTCTAAGTTCCCAGTTTG  
TTGGCAGGATTAAGTTCCTTATTTGTTGTTGGACAGAGGTCTTCAGTTCC  
TTGCTGGCTTTTCTGATAGAGTTTGGCCTTAGTTCTGTGTGAGCCTGGCA  
GCTTACTTCATCAAAGCCATCAAGAGAGAAAGGCTGCATCCTTACTTAGG  
TAATATCCCAACCTTCTGCCATAGTCTGTTAATTAGAAGCAAGTCAGTA  
GGCACAGCTGACACTGAAGAGGGGAGGATTATAAAGGATTTAAGTCTCAG  
AAGGTGGAGATTATTAGGAGCCATGTTAGAAGACTGCCTGCTGCATCAAG  
TTTTCTAAAAATAAGGCACATTCAAATACTTCGTATTGCAGGAAGCCCAA  
GATCTGCAATGACAGCAAAGAGAACCCAGTCTCTGAGAAGAGAACGATAT  
CACAATCTGGGACATGAACTTTCAATTTCCCCCAAATTTCTTATATCTTTA  
GCTGTGGTGAGAAAAACAGAGATCTCAAAATGTGTGCCCCAAGTTTCTCAG  
CCCTCTTCACATTCTGTGTCAATTCTTAAGGACCCAAACAATAAAAAATA  
ACCCAACATCTGTGGTTGAAACCAGAGCCAAATGACTATATACTTAAATG  
ATTGTACCCACACTAGGCAAGCATATCAGCAATGCAAAGTAAGAGATGAG  
AGATTGGGGATCAAGGAGTTGGAAATCTGGATAAAATATACAGTAACTTTA  
ACTAATTACAAAAGCCAAGTAGTGTGCATTGGCTAAGGAGAAAGTGTTAT  
GGTGATGAGGAGGAAACCAACCAGATGGGGTCTAGATGTGTTTGCTCCAG  
GCCCGTGGATGTTGCCAAAGCACTATTTCAAAGGTGCCAACATCAGAGA  
ATTCTCAGGGGAAATTCTTGTGCTGGGAAGAAGGCTGTCTTATTGTTTG  
TGAAAAACGCCTTCATATTTCAAGTCAACACAGCAATTTCTGATGAAAC  
TGGTTTGCAGAATGTAATTTCTTGTGTCAGCCCACTTCCTTCTTAGAATTATA  
GAGTCTCAAAGTTACAAGGAAATCTAAATATTATGTAGTTCAACCTCTAA  
GTTAGTGCAGATTCTTTTCTACCATGTTGATTAAAGGTCATCTGTATCTT  
CTTGAGTCTTGGAGTGATAGGGAAGCCACAAAGTCATGAGGCAGTCTTTT  
CAGTATTAGACTTGTCCAGTTGATGCAATATACTTGTTCATGTTGAGTT  
GAAATCTGGCTCCTTGTGTCAGGTTCACTTACTTGCTTCTAGGTTAGCTCTCA  
AAGACGGTACAAAACCAGACTATTTCCCTATTGGATGTTGCAGACTGGCAA  
TACCAAAAATTATTCTATAAATTGTTTACTCTCCCTCTCTAACTGGCATA  
TCTCTTATGATATGTTGTCTTTTCCCTCAGTGATTCTTTGTATGTTACCAT  
TTGCCACAATGCTCCTTTCTCTCCATAGAATCTTTTAATAAAATTCTAAT  
TTGTTAAGAACCATCTTAAATATAAAGTGCCTGATTTGGAAACATCACTC  
CTGAAATGAGAATCATCAGAGAACTCTTCTTATGAGTTGTAAACAATAGT  
GTAAACAGTAATATTAGGATTTGGGAAGTAAATATTATATTGTTGGCTCG  
TTTGAATTTCTGAACAATGAAAATTTCTCCCTAAATGTATTTTTCTCTTT  
CTCTCTTCTTGTCTCTCTTTCTTCTTTTTTTTTTAACAAGACTATGAAATA  
GGAAAAATGAGACAATAGTATAAATTTATTATTTTCTATGTGTTGGACTG  
CCTTCTGGTGCTTCATATGCATTGTCTTATTTTGTATCTCCTTAACCTCC  
GGAAATAATTGCGATTTTTGTCTACAGATGAGGAACTGAGGCTCAGAG  
AATTTAAGTAGTTTGTCTCATGTTTACACAGCTAGTAAATATTAGACTTTG  
GATTGATATCAGTTTAAATCCAATTTGTATTTTCTCCCAATAAACAAAGCT  
AGACAATCTTCACACTTATCATATAGAGTCTCAATGGGTTCAGAGGTGA  
CCTAACCATATAACAGATAAAAAGATTTACATTATCTCTGAAGACCTAAT  
TTTTCTAAATGTACCTAACAAATGTCAGGGCAATGGCTAGCAACCACCTTC  
CTTCCATCATATCATATTTTCATGATTTCTTTTATATCATGATTGTGTGAT  
TAAAAGAAAAAACTACTTTGAATTTTATCTCCATGTGACTTCCTCTTTTAT  
GTTTTGATTTTATGATTCTACATCAGTGATCTGGTATTAAATCTTTGGGTC  
AGTTATGTTGTTAAATGCCTCATCCAGATTTGTGTGTCATCAGCAAATAAAA  
TAATTTAATAAAAATATGTATACTTTTATGGCAAATAAATATGCATTATA  
ATATGTTTATTATAGATTATATAATTAGGTATGCATAATATAATATAGAA  
TAAATTATACACATTATAATATATATGTGTATATATCTGTGTATATATA  
TTTACCATAGGAACATAATATACACATGTACATACACATACATGCAAA  
CATGTAGCACTTACTTACTTATTTAGTCTAAATCAATAATAAGCCATTG  
AAAAGCCAGAACCAGGAGAAGATCCCTGTGACAGAGTAGTAGATAATTAC  
AGAGTGATTGAAAGCTCTTTTTTTTAAAAAAGAATTATTTACTTATTCATT  
CATGAGAGAGAGGCAGAGACATAGGCAGAGGGAGAGGCAGGCTCCCTGCA

GGGAGCCCAATGTGGAACCTCCATCACAGGATCCTGGGCTCAAGACCTGAG  
CCAAAGGCAGATGCGCAACCACGGAGCCACCCAGGCACCCCTGGTTAAAA  
GAAGCTCTTAATCAGCATTCTTAAGACTTAACTTTTCACCCAGGTTTGAC  
TACTCGGCATTAACCAGTTCCCTGCTGCCCTATCTATGACTATCTAAAAAA  
ACAATAGCTAAGACTTTGCCAGACAGTAGAAATTATGTAACCATTATTTT  
TTCAGACTACATCAGCCTAGGGATATGAATTGGGTCACATTTACATAAAA  
ATCATGTATGCCCTCCTACATACTCTGTGACCTGTGGTCCCCTGCAAAGC  
CCAGTACAGATATCCAGCAAATTCTAATTCTTTCCAGGAATCCTTAGGGG  
GTGATCTCACTCGCTTTCCGGCATGAATGATCTTAGCTATTTCAAGTTAG  
GTCACCTCTTGCTCCTTCCCTGACCCAGATACTTAAAGATGTGGGCTTCCC  
AGGCATCTGGGGCTTGCTGAGCTCTACAGGACATCTTAGCCCATCAACAT  
GGCCACTGTGCCACGGACACTTTTGCACCTTCTTCTTGAAGCTAGTTTAA  
GGTTCAAAAGCCACCTCAGAGAACTGCTTCCCTATAGTGCTGATACTTC  
TCTGCATGGGTTTCTCCAATACAACTGTAAGTACTACTCATGATCGCCC  
TGAAGTTCAAGATATTGCATCTATAATCTCTGAGTCTCCAGTCTACAACC  
AACACACTGTGCTTGGTCCTGAGGTCTGAAGACTTCGGTCGCATTGCTGT  
GTTACTTTCATACATGGGTTTTCAGTGTAGCAGTTGTATCTCTAAAATTTCT  
CAAGCACTTTGTATTCTTTTTTAAGATTTTATTTATTTATTTATAAAAGAT  
TTTGTTTATTCAAGCACTTCCTAAATAGAGCTTCTTCAAGTTATGTCTCT  
CTTTACGCCCTCAGAGTTGCGTATATAAAAACTATAACCAGTTAACAAAT  
AACATTGACCTTCTCCTTCATAAGACTCCAAATGTGGCTCAGAATCTTCC  
ATTAAGAAATTTTTTCCCCAGAAGATGCCTGTCAGCAAGCCTCTTTTGC  
CCACGAACAAGTATCTACTCCCTGAATTACTGAATAAAAAATATAGATGC  
TTCCAAGTGTGATACTAATATTTTGTTTAATAATGGAAAGGGGAGATTTC  
ATTGGAACAATTTCCACTTCACCTGTTATTATAAAATCCTCTCAGCTAGA  
GGCTTTGGGATGGAGGAGGGGAGGTTTCATGTAAGAGGCCACTTGTGCTAG  
GCAGGTGAACATACTATCATGATGTCATGGCCAACCAGAGACGAAAGAGA  
GAGGGAACAGGAGTAGAGCTTCCATAGAGTGGCATGACAAGAAATATTT  
CTATATTTCTCTCTCTCTTTGGCATTATGATTTTCTTATGGCCAACTAGA  
GCTTTCTCAATTTCCCTGTTATATGGGACAGCCTTGTGTTAGCTGTGCTTT  
GGAAAGCCAAAGTGTGGGGTGGCAGCTATGTGGAACAGTGTGAAATGGT  
TATTGGCTGGGAAGTCCAGGACAGAAGTCTGGAGTCAGGTGGAAAACAAT  
CATCAGGCCATAGAAGCCAGCTTTTAGGGACCCTCTGCAGTTCTTTCAA  
GGCCCTGGACACATTGAGGTATAGGATGAGGTCCCAGATTTTTGTATTT  
GTTTTTGACTCTGGAAGGCAAAAAGCTTAGTGAAAGTTGAATTATAAAAA  
TTTTCCATTATTTACTAGTTTCAGGATACTATTA AAAAATAGCAAATCCGT  
TTAGTCGGGCATGGCAATAACTGAATTGGCTCTTTGTCCCAACATTTCTC  
CCATGCTGGCTGATTACCTCTACCCATATTTTCATGCATTTATAATGATG  
TCACATCTATTTCCAAAGAAATAAAAGGTGTATAATTAAGCATGTATA  
CAATAGAATCATAAAATTAAGAGCCAATTAAGGACTAGCAGTGGGAAAT  
AGAGCCATCTCCCAATGAAGAAATTATTGCTCCTGAGCTTAAATTTTCAT  
CACCTTGTCTAGATAAAGCAAAAAGGAGAAGCATTACATAGTGTGTACTAG  
TTACATATGAGATAACTCTCCAGGAGGAAGACACTGCTTTGGAGCAGTAA  
ACCAATGAAGGACTTGTCTAGTAGAGAAATTACATAGTATTGATAATGAGG  
TAGGCAGATTGATAGATCTATGAGAGATACATGTATATATGTAGCTATGT  
CTACATCCATATATGTGTATGTGTGCATGTATATAGGTATATAGGCAGTT  
AGCTATATTGAATTTTACTGCATTATGTAAAAAATAAAATTAGAAGATCT  
CACTTTTGTGAGATCTGAAGTAGCATGGACCAGCAAGTCAGTTTTTTTATT  
ACCTGATTTTGACACAGAGGCTTATGAAATCTACAATCTATAGAGAGACAT  
ATCCCTTACATTAGGTTTTTCAAGAGGGCTTTTAAACTGAGATTTCTGAA  
CCTCACTCCAGATATCCTGAATCTGGTGTTTTTGGGGGCAGCAGATTCAAG  
AATGAAGTCCATAAAGAGTTCCCTATGTGACTCTGATCTGTGAACAGGTGG  
AAGACTGGGCCCATTGCCTTGGATTACTACTCTCAAGTATCAAATGCCTT  
TACCTAAATTTTGACCAGATGTGAACAAAGAATGACCAAAGACTGAGGTC  
AGGAGACTGAAGGAGTATTTAATAATTCTTTATAAAAAATAGCTCCTCCTAC  
TGCATTTTCCCTTCAGTAGGTACCCAATAGGTATTGGCTAATTTATTAAAT  
GCCCCATTAAATAGACCTTGAGAAAATGTAAATATAAGAGGGACTGAAGC  
CAGTTTTCTTCTCCACCATCATCACCACCAGCAAAAACAAACAAACAAA

TAAACAAATAAATAAATAAATATTATAATAATAACCCAAGAAAATTTTCT  
TTAGTGTATAATCACCATGTGACCCAAATGTCCTTTTATCCCCTCTTTAT  
TTGAGCAGGTCACCTTTAGATTCTTTAGGAGTAGCAAAAGATGTTAGATAT  
TTAGGCTGCTAGCTGGCCCTGTGCTTACCAAATCTTCAGGTTGATTCACG  
GCCGTTTGTGAGATTATGGATGTTGTGACTTTTTTACCTTTCAAAGCTTT  
TATGTTTCATCATTCTGAGTGCAGCCAGGTGTCAGCAAGATCAGACAATG  
TTTGTGGCTTCAGCTAAGGTTAAAGAGAGGCCAAAGATTCTTACAGGTGAT  
GATGCCAGAGAATGAATCAATAGTCAAATTTAACCCAAGTTCAGCTTGT  
TAATGCAGTACATGGTTCAGCTGCACTTTATTCCCCAACAGATTTTTTCA  
AAGTAAACTCAATTAGTCCAGGTGTCCCATATTTTGTGCTGTGCAATTT  
CAGAATGTATTTAGTTTGAAGATAGATTTTGTCTTGAAGAGGTCAAAG  
GGATTTGTAAAATCTTTACACCTTTGGATAGCCCCAAAATACAACATAAGAA  
GGATCAGCTGAGGTGCTTTCCAAACAAATTTAAGTACATACTCTATACTC  
AGAATATCATCATCCCTTTGGCAGCCTCATTATGAAAATTTTGTAGATCAGA  
CTTCAATTCTAAAATGGAAAATTTCTCCAGCCTTTGGATGATTTGCCTGT  
GAATCAACCTAGTCCCTGGAAAAGGTATACTGTGATAAGCAGAACTGTGT  
TATATGGTTGTTTCATGTCTGAGGCCCCCAGTGGGCTGAAGACACAGGTC  
TCTGAATCAGTTTAAACATAATATGCTGAACATTAGTCCAGAATTCATAA  
GGTAGAACTTGATTTCCATCCAGAAAGGGACTTAGAAAAGAAATTATTTTG  
TAGAAAAGACTTAAAATAGGAAAACCCCTTTGTACATAAGAATTAGATTTCT  
AAGTTTGGATAAAATAACTAAAATTTTGTGTGTGGAAGTTCTACTTTGAC  
CCAGGCTTAATGGTAGGGACCAGTGATGCCAGTTCTCACTGGCATTAAAT  
AAAAATAAATATAACCCCTTTCCCTCCTGGAGATTTTAACTAACAAATAAA  
CATATAGTTAACAATGGAGGGGTAGGTGTGCTGACCCCCAACAGTCAAA  
AATTCACATAATACTTTTGGTTCCCTTAAAATTTCACTAGTAATAGCCAA  
CTGTTGATCAGAAACCTGACCAATCGCATAAACAGTCAACTAACCCATAT  
TTTGTGTGCTGCATATATTATATGCTATCTTCTTACAATAAAGTAAGCTA  
GAGGAAAGAAAATATAATTAAGAAAATTATAAGGGCAGCCCCAGTGGCCC  
AGCAGTTTAGTGCCGCCTTCGGCCCAGAGCGTGATCCTGGAGACCCGGGA  
TCGAGTCCCACCTTTGGGTTCCTGCAGGGAGCCTGTCTGTCTCTCTGCCT  
GTGTCTCTGCCTCTGTGTGTATGTGTGTGTGTGTGTGTGTGTGTGTGTGT  
AGTAAATAAATAAAATCTTTAAAAAAGAAAGAAAATTATAAGGAAAAGAA  
AATACATTTGATAGATACTATCTTGTATTTATTGGAAAAATGTGGTATAA  
GTGGATCTGCATAGTTCAAACCTGTTGTTCAAGGGTCAACTGTATACGAA  
ACAATGCCATTTAATGTAGTTTGAAGTGTTTTAGTAAGAGGATTTTAAA  
ATGCTAAATTAAGATCACAGTCCACTTGGTAAAGTACAAGGTTAGGGGAA  
GTGAGGATGCATGGAAGGCAATGGGAGTATGAACAGTGTTTACAAATG  
CCAGAAGGCAAGAAAACCATGAGGTCAGAGAACCTTCAAGAACCTAAAGA  
AATCAACATCTGGTTGGATTGGAGATAAGGGTGAAAGTGAGGGAAGGCT  
ATTTAGTGACAGTGTCTGAGCTTGTGGTTTGAATAAATTGGTGGCAGTTTG  
ATCATAAAGATGACAGATTTGATTTGGAGCAAATTGATTTTGAAGTCCAT  
GTTTGACATCCAAGTGGAGAAGTTCAGTGATTTCTTGTTATATAGTTCT  
TAATCTTGGAGAAAAGATGAACGCTAAGGTTAATCCATAGATATGGGAAT  
AATAACTGCCACCATGATGGCTGGAGCTCGCGGTTGGATGACACTGCGTA  
GAGCAAAAAGAAAAGACAGGGGGACCTTACATTAACAGCAGAATGAAAAG  
AAAAGGCAGAGGAAGTAAGAGAGGTAAAAGGATTGCTGTTTGCTAGAACT  
TTCGGTTTCTAAGCAGAGGATAACTTCTGATATAGTTAGGGTGATTCAA  
ATTGTCTACAGTGGTACAAAGTGTTCCTTTCCGTTCCATCCTTTGCC  
TGCACTCTCTCTCTCTCTGTTTTCTTTTGACCTCCTTTCTGCCTCTCCCTT  
CTTTTCTCTCTCTCTCTCTCTTTTATATATATTTAGTATTTGTCTAGTAT  
AATTAAAATTGAAGTGCAGGATGGAGCTTGGAAAAAGCAGTGGTGCAGTGT  
GGCATGTTATATGGACAGGATTACTTTAAAATAATAAGATTTAATAGTCA  
GCCCTTCTTACTACCTCTGATTTTATAAATTCATGGCTATTCCTTAGTATC  
TACTTTCTTTTTTTATTTTTTATTTTTTATTTTTTTTATTTTTTTCCCAACGG  
CCTCCTGCTTGTGCCCCCTCCCCCTCCAGTATCTACTTTCTACAAATA  
AAAAAAAAGAAGTCTATCATAGATGGGTGAGTTAATTTGATTATATAACC  
ATTTGATTTCTTTTCCAAAGCAAATCCAATGATAAGGTGTTACTGCCAGG  
TATCTCTGTATTCTAGATATTTTCTACTTATCCCTCAGATTCCTCTATA

TTTTCTTGTTACTGCCCTTTGTCTTGAGAGGCCTGCTTTTATGGACTGCA  
TCAGCCAAACTCCCTTGCCCCCTTTCTTCCAGTTGGGTTTGGCCAATGGGA  
GGTGTCTGGCAAGAGATGGCAGGGTAGGATGAAGTGAGGTAGTTAATTCAC  
CAGCTCTCTTCCCTACTGGCCACAAGTTTTTCAGTGACTGTATTTCTCAACC  
TAAGAAAATAACTCCTGCCACAATCCTCTCTTCTAAGGCTGTGGGTCTCT  
CATGTATAGTACATGCTCAACCCATGTTCCCTCTGTCTTAGCAAATGGTGA  
TGGATTTTTGATCTCACTAACTATGAGGTGCTTATTATTCCCTTTCACTT  
TCAGTTAATTCTTTGTAAAAGTGTCTTTGTTAAACTCTTCTCAGCTATCC  
CATTTACATTTTTTCATCTATTTGCTTCTGGTACCCTAATGGACAGAATCT  
GTACTGGACTGTAGGTTATTTGAGGATAAGATCTCTATCTTATATATGTT  
ATCTTTATTCTCTCAGTGCCCTAACTAGGACTAGTGCCTTAAAAGAGTCC  
ATAGGGAGTATTTTAAAAGATTTATTGGAAGAATGAATATATGGATGAAC  
ACTACTTCTAGAATGAGTTAAGCAGAAAATAACACAAAAGTAAGAGGCATAA  
CAGCTTATAAACACACCTTGAAAATGTGTGGTCTGACCCCACTTACTTG  
GCACTTAGACAACAGAATCCAAAGTGATGGCTATTTCTCCTTTTAAAGAA  
AATTCAGATAAAACACCTAGATTGCAATAGCACCAAAATCTAAAACCTAAGC  
TCTACATACTGCAGTACACACAGAAAAGTTAGATGAAAAAGCATGGAGAT  
TCAGGAGGCCATGTTTGAAAAGGAATGTAAGCCACAGGGCTCCTTCCTTGA  
GAAGTTAACTCCCCGATTTGAGATTAGCTCCTGTGGTTTGGCTGGTTACA  
GGGTAGATGTTTAGCAAGCAATAACAGACATTTCCCCCTTTTCCCCAGGC  
AATACAGTGCCCCAAACCAAAAAAGCATTGTTCTGTCTATAAAACAAAATA  
AAACATAACAAAATGGCACAAGCCCACAATGGAGCATGCTGAAGCAGTAT  
TTTCCAGTGAGAATCTTAAGGATTAAGCAGCAGTATGGCCAGATTCGTGT  
TTCTTTTTCATGACCTTCTTGCTGTACAGAGTGAAATGTCAACACACAAT  
GAGCTGGTTGACTAAAGGAGGTTTCTGTGCGGTATGGGAGGTAGACGGGA  
GAGCTGGATTGAGGTGCCAACTGGACTGACCTTTTCCATTTGTGTTGTGA  
GAAAAGCCGCAGAGAGTGGCTGGATTACTGTCTAGAAGCCAAAGGCAATG  
CTGAATGGGCAAAGGACTTCAGGGCCTAGTGGGTATGCGTGTAAGTGTTT  
ATATGGTGGTCTGCTGCCTTTTTGTACCATTTCCACTGTTCCCATGCTTG  
CTACTCCCCTGTTGCCACCGTTTCATGGCACTGCTGGTGTCACCGCCACC  
GCGCCACCGTTGACAATGCTTTCATGACCACCACCACAGTCAAACTAAC  
AGCAATGACAAGTATCCTGGCACTGTTCCCTGCTGTACTGCTCCACAAGGA  
AGTGATACAGTATAACAGTAGATTCCCTCCCTCGGATTAAAATACGTACCAC  
GAGCCACACTCTCTCACTGTGTGACCAGAGTTTAGAAGGCTCTGTGCTCA  
CCAACAGTCACAAATGCTAACTTGCAGCCCTCAGTTCCCCACTAGTATAC  
TATTTATGAAGCAGGTAAGAAAACTTTAGGTGAGCTTTTTATCAGAATAA  
GCAAAAGTTCAGAGATTTTGACATGGGTAAGATATTATTTTATAATAACT  
AATATTAGGAAATATTATTTTATATTAATGATATTACTTAATATTATTT  
ATATTCATTGGCATTAAAATAAGATATTACACAGAAGAAATGAATTACAA  
AAACATACATACACACACAACACATACGTACACACACACGTTATATTTGC  
CAGAGACCTTAGTAACTTTAGAATTCAATCTGCTTTCTTCTTTGACACCT  
TATTGAGGTATAATTTTTATATAATAAAAAGTCATCCACTTTAAGTGTGTA  
ATTCTGTTCTAATAAATACATGCATTTCATGAAACCAGCATCAGAATCAAG  
ATTTAGAACCCTTTCTGTCCGCTCCTAACATTTCCCTCCTGTTGTCCTGTG  
GTCAGTCTCTGCCAGCAGCACTGACCCTAGGAAGTCTCTGATTGCTTTCT  
GCCACAACAGTTTTGTCTCTCCTTGAATTTTCATATAAATGGACAAGATA  
ATAAATAGTATTTTACTGTTTTAATTCATCTATTATATTCCACCTATTA  
TCTTCTTGTTATTATTTTAATAATTGCTTTATGGTCTGCAATATATATAT  
ATATATATATATATATATATATATATATATATATATATATATCTTTGA  
CTTGTTGGCAATACATTTTATTTCCAGCAAAGAATGGGAAGTCTGTATTAGA  
GTAGCCCAACCCAGCCCAATTTTATACTGTTGATTTTCATATATAACACATC  
CCTAAACATTATAAACCCACAATAGAGTATTTCCCTATATTTTTAAAAGTA  
ATTTTGTGTTTCAGACAACATATGTCTTCTAAAAAATAAGGGAAGCAAAG  
GTTAATGTACCTATGGACCATTTTTTGTGTTTGTGTTTGTACACATGTATT  
TACCATTTTTTTTTGTGCATCTGGGATATGATCTGGTGTCATTTCTCTTCA  
GCCTGTGAGAAACACAGAGCTGCTAGCAATAAGTTCTTTCCATTTTTTATT  
TGGACATGCCTTTATTTTTTAACCATTTTTATAAAGATTTATTTATTTAAGA  
GAGAGAGGAAGGAAGGGAGAGAGGGAGAGAGAGAATCCAAAGCAGACTCC

CCACTGAGCACAGAGCACCACCTGGGGCTTGATCCCATGACCCTGAGATC  
AAGACCTAAGCTAAAATTAAGAGTTGGCCACTCAACCAACTGAGTCAACC  
AGGCATCCCTAGATATCTTTCTTTGCTGCAATATTAATTCCTCTCTCCCC  
ATTATTTTTTGTGTTTTTGAAGATTTTATCTTTGTTTTGAGTGAGTGAGAGA  
GAGAGAAAGGGGGACAGGGGCAGAGGAAAAGGAGAGGGAGAGAATTCCA  
AGTAGGCTCTCTGCTGAGCACAGATCTCAGTGCAGGGCTCAATCTCACAA  
CCCTGAGGTCATGACCTGAGCTGAAAGTACAAGTCAGAGGCTTAACCAAC  
TGAGCCCCCAGGTGCTCCTGGACATGCCTTTATCTTACCTTTATTTTTG  
AAGACTAGTTCTGTTGAATATGAAATTATTGGTCAACACTTTTGGTTTTT  
GTCTTCTAATACTTGTGTCAATTCCAATGTTTCTAGACCTCACTGATTCTG  
CTAAAAAAAAAAAAACAAAACCCACCACTCATCAATCTTACCATTTTCTTC  
CATAAATTATTTTCTCTAGTTGCTCTCAAGATATCCTTTTTCTTTGCCT  
TTCAGCAGTTTGACTGTAATGTGACTTCATGTGGTTTTCTTTATGTTTTC  
CTGGTTGGGTCTGTCAAGCTTGGATATGAAGGATCATAGTTTTACCAAAA  
TTTGGGAAGATTTCTCAGTCATTATTTCCCTTCAGTATCTCTTCTTCCTCC  
TTTCTTCTCTCCTTCTCTCCTTATGACTCCCCTAGTTGCATATGTATTGG  
AATACTTGACAAAGTCTCATAAATTTCCAAGGTCTGTACAGTTTTCTTCA  
AGTTTTGGTCTCTGTTCTTCTAATTTGATAATTTCTACTGGTTTGTTTTT  
CAAGTTAGTGGATTTTTTCTTATGGCATCTCAAAGATGCTGGTTAGCCTA  
TCTAGTTAGTTTTAAATTTTTAGCTATTGCATTTTTAAGCTCTAGAATTG  
CCATTTTACCCTTTTTTAAAAATGTTTTATTTGAAGATAGTTAGCACACA  
ATGTTATCCTGATTTTCAAGGTGTACAACATAGTGATTTGACAAGTTTATGT  
GTTTTACTTTGCTCACCAAGTGTAGCTACCCTCTATCACCATGCAAGG  
CCATTATAATACCATGACTTATTCATTCCATAGCTGAAAGCCAGTCTCTC  
CCTCTCCCCTTACCCATTTTGCCCATCCTTCTATCTCCCTCCTTCCTGG  
CAACCATCAGTTTGTTCTCTGTGTATAGGTCTGATTCTGCTCTTTGTTTA  
TCCATTTGGTTTCCTGGACTCCACATATGAATAAAATCATACTGCATTTG  
TCTTTCTCAGTCTAACTGATTTCACTTGGCATAATACCTTCCAAGTCCAT  
CCATATTGTTGCAAGTGGCACTATCTCATCCTTTTTTATGTCTGTGTAAT  
TTTTTAGTCTGTATATATATATATATATATATATATACACACACACATAT  
ATATGTATATATAGAATAATATCTTCTTTATTCATTTTTCTATTGATGGA  
CACTTAGGTTACTTCCATATCTTGGCTATTATAAAATAAGCTGCAATAAA  
CATAAGGTACATATATTTTTTCAAATTAATGTTTTAAGAGGTTTTTGGG  
GGGAGTAAATACCCAGTAGTAGAATTATTGGATCATACTGTATTTATATT  
TTTAATTATCTGAGGAAACACCTTATTGTTTTCCACAGTGGCTGTACTGA  
TACACATTTCTACCAGTGGAAAGTACAAGGGTTCCCTTTTTTCCACATCA  
TTGCCAACACTTGTTATTTCTTGTCTTTCCGATTTTGAGTATTCTTACAT  
ATATAAAGTGATATCTCATTTTGGTTTCGATTTGCATTTCCCTGATGATT  
AGTGGTGTTGAGTATCTTTTCATGTGCTGATTGCCCATCTGTGTCTTCTT  
TGGAACATGTCTATTCAAGTTCCTCTGCCCATTTTTTCAACAGACTGGTT  
TTGGATTTTTTTTTTGGTGTTGTTTTTTTTATTGTTGTGCTGTTTGGT  
GTCGAGTTGTATAAATTATTTATATTTTGGATATTAACCCCTTATTGGAT  
ATATCATTTGCAAATATCTTCTCCCATTTAGTAGGCTGCCTTTTTTTGTT  
TGTTTGTTTTGTTGATGGTTTCCTTCACTGTGCAAAAGCTTTTTATTTTG  
ATGTAGTCCCTAATAGTTCTAATAGTTTATTTTTTATTTTGTTTCCCTTGC  
CTTAGGATACATAGCTAGAAAAATGTTGCTATTGTGATATCTATGTTCT  
CTTCTGGGATTTTTTATGGATCCTTTTCTATTAATAATTCCACTTCTCTC  
TTGGGTGTTTCTACTTGTTCACCTTTTTCTTAGTATATTTTGTTTAATTC  
TTGGAACATATTTCTAATAACTGCTTTGAAGTTTTTGCTAAATCCAACAT  
CTGAGCCATTAGGCATAAGTTTCAATTAACCTTTTTTTTTTTTTTTTTT  
GGTGAGAACATTAAAGTTCTCTCTTAGCAAATTTAGTTATACAGTACAG  
TTTGATCAACTACAGACACCATGTTTTTCATTAGATCCTAAGGCCTTCTT  
TACCTTATAGCTGAAAGTTTATACCCTTTTACAAAAATCCCACTATTTTC  
CCATCTCTCAGCCCTGGCAACCACCTTTTCTACTTTCTGTTTCTGTGAGTT  
TGTCTTTTTCTGTAGATTCTATATACACATGATATTGTGCAGTATTTATC  
TTTCTCTGTCTGGCTTATTTCACTCAGCATAATGCCTTCAAATTCATCC  
ATATTTTTTGAATGACAAGGTTTTCATCTTCTCATGGCTGAATAATAT  
TCCATACATACACATGTGTACACACACACAAACACACACATACACCGTAT

CTTCTTTATTTCGCTCATTGTGTTGACAGACACTTAGGTTGTTTCCATGCTT  
GGCCATGCTGAATAATACTGTGATGAACATGAGGGTGCAGATATCTCTTT  
GCTATCTTATTTTCATTTCTGTTGAATATATAACCCAGAAGTGAAATTGTT  
GGATCATACAGTGGTTCTATTTTAATTTTTTTGAGGAAGTTCATACAGTT  
TTCCATAGTTGCTCCACCATTTTCATATAACCACCAACAGTGAACAAATAT  
CCCTTTCCCTCCACTCCTCCCCAAAGGTTGGGCCTCGTAATTTTTTGCTTTA  
AAAGTAGGCATTTTTTTTTTATTTTTTAAAAGATTTTATTTATTTATTCAT  
GAGAGACACACAGAGAGAGAGAGAGAGAGAGAGAGAGAGGCAGAGACATAGGCAGA  
GGAAGAAGCAGCCTCCATGCAGGGAGCCCGATTTGGAACCTCGATCCTGGG  
ACCCCCCAGGATCATGCCGTGAGCCGAAGGCAGATGCTCAACAGCTGAGC  
CACCCAGGCATCCCAAAAGTAGATATTTTAGATAAGGCATTATAATGATT  
CTGGGTTCATTTTTTCCTTGTAAGAGTTTATTTTTATGTTTTAGTAAACT  
ATTAACATGCACGGATATGAGGTGAAAGATCTGTTTTCTTGTGGTGTGC  
AACTGCTAAAGGCTATGCTATTTGGTTTTTGTTTTTTATCCTTAATTTTC  
TAGGAGTTTTCCCCTACATCTATTCACCTGAGTGGTCAGCCAATAGTTTGT  
GTAGAGGGCTATACTCAAACCTCCTCAAGCTGCCAAGATTTCCACCTTTTGC  
CACCCAAGCTGTGTGTGGGGGTTGAAGAATACATTCAAAATGCGTAACAAG  
TTTACAAGTCTCCCTAGGCTTTTGATTTCTGCCAGATTGTCTAGTGTCTT  
CCACATGCATATGCAGTTTAGCAGTCAGCCAGAGAGTGAATTATATCAGC  
CTTTCTATGGTTCTCTTGCTTCCAAAATCTCCTCATTAATTTCTACTTG  
CTTTACCACCTACCCAAAACCGAGTTCACCACTTCTGACCAGTAGAATTT  
TTACTGTTGGAACCTGGGAACAGAGAAATCCTCTAGGCAAGAAGCCTAAA  
AGCTCATTTGTTTTTCTCACAAATGCAGGGTAAGTTTTTCATGAGCAAGTA  
CTCCTCAAGTTCTTGCTTGCCTTTGGGTGTTTTCCAGTGCTCTGAAAAGG  
TTGATTTTTAATATTTTTCCCAATCTTATCTTTTTGTTTTTCTGCGTGGG  
GAAGTTGAACGACCTCAGGCATCCATTAATAAATGGAGAATGGCCTATTT  
TGCATATTTTTTTGGTGAACACACTCCTTTATCTGAATTCCTTGACATCT  
CTGTGACTCATATATATATCAGGATTGAAAGCACTCACAAATTGAAGCAA  
GCCCAGTGAGTCTTTGGAACCTACATGATGCAATGGACTCAGTGGTGTCT  
TGATCAAATTCATATGTTGAAGTTCTAACCCCTAATGTGACTGCAATTGA  
AGATAGGGCTTTTAGGAGATAATTAAGGTTAAATGATATCATAAGGGTAG  
AGTGCTAAAACAGTAGGATGGGTGGCCTTAGGAAAAGAAGAAGAGAGAGA  
TTTTCTCAACCGCACCTACCAAGGAAAGGCCATGTAAGTGCACTATCAG  
AAGGCAACCATCTGTAAAGTAGGAAGAGCACTCTCACCAGAACCAACCAT  
GCTGGCACCTGAGCTCAGACTTCTAGCCTTTAGAACTATGAGAAAATAA  
GTTTCTGTTGTTCAAACCTGCTCATGCTATGGCATTTTGTAATGGCAGCCT  
GAGGTGACTAATATACATGGAATTCTCATTACAGGTAACATTTGCAGTTCC  
ATGAGGTTTCAGAAGTTTTCTATATCCCTACTTTTTAAAAATCAATATA  
AATATTGAGATTTAGGCAAAATATTGTATTTTCCCAAATACAAATAAGTTA  
TCAATGACAGTTGGAGCCATTGGGCTAATGGGAGCAACTCCATCACCAGC  
AAAAAAGCTACCAACATATTTTATAGCTGACAACTTCTCTCAGATATA  
TGCATCTGGAGATCCAAGTTTCCTTCAAGCATCTGATCTATCACACTGAT  
TCTGCAGTTTTGCATGGTAGCAATCTGCTGGGACTGAGGAGATGCTAGCC  
CTTCAGCTGGACAAGGCCCTATGACCTAGCCACAGTCTGCATGATTCTTG  
TCCCTGACCATTCCACTCATTGAAATAATGTTTTGCCTTGTTAGATATT  
AGAGGTTGTAATATCTGAAGTTTATCTGTTGTCATAGTAAGCCAGCATTT  
ATTTTTGTCCCTCATTCTAAACATCAGGCTATCTTCAGCTAAAATAAATGA  
ATTTCCACAGAAGTCCTTTTATGCATTTCTTTTCTTCTAGTGACAGTTGA  
GGTAACCTGGATTAAGGACTTAACATTTAAGTTTATTGAATCTACTCAAAA  
TTTTTAGACAGCTGAAGATTTCTGCCTTCATGGCTCTCCATTTGCAACCA  
AAGTCTACATCTAAAAAATCTAGAAGAGATGGTAAATGTAGCCACCAAGG  
AGAAATCAATACATTTTCCCATTTATAAAAACCCCTTTGCTGCCAATTTTA  
TGGATTTATAATTTCTAATCAATAAATTTCTCTCTGTGCCTACTCACAGT  
AGACTTTTCATTTGCCTATATCAATTCATTTTCTCTCTTAAATGTAATAAA  
CTCTCTTCTATTCTGGAAAGATTCTCAAGTCCAAAGCTCTCCTTCATCA  
CTGGCACTATACATTGTGTAACATCAGGGAAATTGAGTCATGGATGTGTT  
TTCAAGATAAATTGACAGTCTCCATTTGCAAATAAGGCCTGTTTCATATC  
CTGAAGCATTTAAAGAGCTGCGGAGTGGGATTTTTCCCTGTGATCTAGAC

GATGCTATCTTATATCCTACAAATATACTGAGTACATCATATATATATATAT  
ATGATTCTTTGATTCTGCCTTGGAGCATCTAAAACCAAAGATTAACATA  
ATAAGATTATCATCTTCTGGGTCATATTCTCAACTAGGTATTCTCACTTT  
CCCACAGGACAGGTCTGTCACTGTTCTTACCCTTGAGTTCCTAAGCATGA  
GTCAATCCTGTGGTAAAATGTTCCCATTGTTACTATAACTTCAGGTATTA  
GAGGGAAAGCCCATCTTCAGGGGTTATTTCCAGGATAACAGATTATTAAG  
AACTGTTCACTTACCTAGATGACTGTACATTACCAGACACATGGCAGTTA  
CCAAGCAATTATTTCAGACACATGGCAGTTACCAAGCAATTATTTCAGATAT  
TTGTTAAACAAATAAATAGACTTCTTATTTCACATTGTTGTTTACAATAGT  
AAAAAAAAATACAAAACAACCTGAATTGTTAATATTAGGATATTTTAAAT  
TAAGTGTGTTACAATGCATTCAATGAAAGGATACTTGATGTTAAACATG  
ATGATTTCATCTACATGTTAATTTACCATGCAGTGTTTTCTGATTCTCCCT  
CTGTCTTTCCTAGTGCTCTTTGTCTCTTACCCTCCCCCTCCAGTCCCCCTTA  
GCATAATTAATTTCTAAAATTCTGCCACTGGTGTGAACAGGTGGTAGGGA  
CAGGGCAGAGGTAGTGGGAGAAAGGAGAGACAGAATCTTATGCAGGCTCTA  
CATCCAGCACAGAGCCTGACCTGGGGCTAGACCTCATGATCCTGGGATCA  
TGACCTGAGCCAAAATCGAGAGTCAGATGTTTAAACAGACTGAGCCATCCA  
GGCTTCCGACTGCCCCCGCCCCCCCCCCCCCGCTTCTGGCTCTT  
TTTAAATCTCAATTTGTTTCTCGTGGTGGTCCTCTATATACACAGAATTT  
TAGCTCTTGCCTGTAGACCATACAAAGGGGTAGGTCATGGCATAGTTAAT  
AAGGGAGTAAAGACCTTGAATTACAAATCCAGGTAGGATTTGGACAAGTA  
AAAAGTAGACAAGACAAGTAGAACAAGTAGAAAGGACAAGTAGAAAGAAA  
ACTATCCTAAGCATAAGAGAAAAGTAAAAGAATAGTGGGAAGGATCAGGGC  
TATGTGAAGGAGAGGTGTTATCACCCCTTAAGTATCAGGGTGAAATATGAA  
ACTAGGTGGGACTTTATTCTGCAAAGACTATAAACTTAGTTTTAAAGAT  
AATTGAGGCTCACAGATGAGTTTTCTCTATGGGGAACAAGATGAGAGAGT  
TATATTTAGAGAAGATTGCTATGACAACACAAGGAAACTTTGGTTGGGGA  
GACACAGGAAATGCAAGTGGATAAAAGAGCAGAGTGATATAAGTGAGAAG  
TAGTGAGAGTTTGGTAAATATATAACAGTAGATGTGGAAAATGGAACACA  
CACTTTAGCTCAGTAATTGGCAAAGTATGGTCCCTTGGAACCAATCTGCC  
TGTTTCCTGATTTTGTAAATAAAGTTTTATTGGAACACAGCCACATTCATT  
CATTTATATATTGTTTGTGGCTACTTTTGTGTGATAGTCGAGGGTTGGG  
CGTTGTGACAGAGACTGTATGGCCACAAAGAGCAAAGTATGTACTATTTG  
GTACTTTATCAAAAAATGTTTGCCAACTTCTTTTAATTCAGAGCTGCT  
AGCAAAGACCCACCCTAGAGTTTGACAAAACATAGAGGATGGCACAGAGG  
CAGAGTCAAAAACAAGAGTGAAGTTTCATTTCTTTCTTTCTTGATAGTCA  
CACACAGAGAAAGAGAGAGGCAGAGACACAGGCAGAGGGAGAAGCAGGCT  
CCATACACCGGGAGCCTGACGTGGGATTGATCCCGGGTCTCCAGGATCG  
TGCCCTGGGCCAAAGGCAGGCGCTAAACCGCTGCACCGCCCAGGGATCCC  
CAAAGTTTCATTTCTATATGAAGTTCTATATGACTGGAAGGATGGTGGCA  
TCAAAGGACATCATGAAGTTGGGAAGAGAAAGACTTTGAAGAAAAGGAG  
ATGTATACATCTTTGGCTAAAAGTTCCCAGAAAATAATGGAGAATTAATA  
ATCTTACTATCTCATCTCCAAGTATAAGCAATTGTTTCAAATATTTTAAG  
CATCAACGAGAGTGCTAGTGTTCAATCAGGGTCCAACCTAGGGATCTTTTC  
TAGGTGGTCTAAACATCTCCAAGGCTGTCTGATTACCTTCCATGCTTCA  
ATGACAACCTTTCTCCTAAAGTTTGGTTCTCCATTTGCTACTTGACCCTTG  
AAGTAATTTTTTAACAAGAAGATTTTAGACCGTACTGTCAATGTCAGAACG  
GATTTTTCAGATTATTCTCTTCATTCATAAAGGTTTTTCAGAAATACTAT  
CAATCTATTAGCATCGTGCTCAGAAGTTTTTCATCAGAGAATAGCTTTTTTC  
AGCTCAATAATATTACCTCCATATTTGTATTGGAGATAATGTCAAACCA  
CAGAGGAAAATTTAATTTATTTCCCTGATAATCTTAGCTTTAAAAATGCT  
TAATAAAAGCTGATAGTACATGAAACTTAAATTCATTATCCTATTGAAT  
AATGAGTTATTAATCGTATTTTAAATATATATAAAACCTCAGTAATGTGAC  
CATATTTTATAAGCTGTTTTTGAATGAAGATGGAAGTGACATAAGCAGATA  
ATTAAGTGAGCATGTGTGAGATGTAGTCTCTCCACAAACGTCTTTTATTT  
TTCGCACCTGAATATTCAAGGATATTTATTTCTATGCGAAATCGTTAATA  
TTGGTGTATCTTGTTCTGTACAGTTTTTACCCAGAAGTTGCTTTAATCCCA  
AATATATGCATAGTGTTCTTTAACACATTAGACACTAAAAGAAGAGGAAG

AAGGAGGTGGTGGCGGGGATGGAAGGAGAAAGAAGAGAGAAATAGTCCAC  
AGGTAGGGTGAGGACTCAACTCTGTCCCCGCATTTCTGGGTAGCTTTCTA  
CATCAGTCTCCCAGCCCCCTGAAGGGGAGAGAGTCAGCGCTGCTCCCCCT  
CCCCACCACCTCCAGACTTCTATGTTCTTGCTCTGCACTAGCAGCCTCC  
ATTATAGGGTAGGCCAACACCCACGTTTCAGCTCCTGGAGCTTTAGCCAGA  
GGCTGTGACCTTTTGTCTCTGAGTTCTCAGGCAGCTCTAGAATCACAT  
GCTTTTACTCCTTGATCACCTGGTACAGCTCTGAGTTGTCAGAGGCCAGG  
AATGAGACCCAGCTCAGAGCTTCCTCTTGGAATAAAGCTGGGGAAATGAC  
ATTTGCCTGTCTATGAAGGAGAGGGAGTGGCCTCCAGCTAGACACCAAGCA  
CAGAGACATCCTAGGCACCCACCCTTCTCTAGCCCTAGCATCTCACAGGG  
GCCCCACTGCCAGGGCCCAACAGAGCCACTAGGCTCATGACACTGTTGTTA  
TTGAGGAAGGAAGACAGGCTCAAGTCTGAGCTGGGGAGCTGAGGCTGATC  
TCACTCCAGGAAAGGGACAGAGCTGCCCTCAGGAGCCACTGTATGCCTCC  
AGGAGACCAGGCAAAGTGAGGTGACACCTTTATTCTTGAGCTCAGTGTG  
TGGCCCATAGGAGGGGCTCAGAAATTTTTTAATGAAGATGCAAAGCTCAA  
ATGAAATACCATCTGTACCTGCAAAGCTTAAAGACAGAATGAAAAGTAAA  
TGAGAACTGGGGTCTTCTGCGTGAATATTTTTTGATTTAAGTTACATTTG  
AATGTACTATGTTTCTTTCAAAATAAAGCTGTAGATACTTCACATTAAAG  
AAAAGGAAGAGGGAGGAGGAAGAGGAAAGACAGAGTGTGTGTGTGTGTGT  
GTGTGTGTGTGTGCATGGTAGCAATAGAAAGGGAAAAAGAAAACAAATAC  
AAACAAAAATAATGGGGAGGCTTACCGTCTTCATGGTAGATTTCTTTTCT  
AGTAGGAAAAGAGTTGAGCTAGTAGGTATGAGTTGTTTCCTAGCTCTTAT  
GGAAGAAGGGAAGTGTACAACTATAGCTCCAGAACACTACAGTGAGTTG  
GGATGATTTGGTGACTTTCTGAATTTGCATTTGTAGCCCTCTGTTATCAC  
AAACATATTTCCTGTGTATTTGGGCATTATTTAAACTAAAAAAAAAAAAAA  
ATCAGCTCTACCCAGCAGGTAAACATCTCTGACAGATAATGCTAAATTA  
AATAAACAGTGTCTAATGAGATCTGTTATTACCTGCTCTTTGGTCATGCT  
TGGGCATGCAGTCGGCAGGCTTTTGTCTTAAGTGCTATCATAAATCTTT  
CAGCCTATTTTGCTCCTTAAATTTCTAACTAATATCTCTCCTCTGATATG  
GAAATCTGTATCCTCAATTAAATCTTTAAATCTCATTTAAATCCCCAGTG  
TTACAGTCTTTTGTCTTCATTAAATCTTATCTTTGAAAAGATAAGAAATT  
TTGCATTACGACAGATCATTTTTTTAAAGGAGAAAATCCACTTGCTTGAA  
AATAAGAGAGTATTAAGAATAGAGTTTTGCCAGAGGGATAAATACTTGAA  
TCTGGTCAATCCTTCCATTTTCATTGACTTTTTTTTTTTTTTAAGATTTTA  
TTTATTTACTCATGAGAGATACAGAGAGAGAGAGAGAGAGGAGAGAGACAC  
AGGCAGAGGGAGAAGCATGCTCCATGCAGGGAGCCCGATGTGGGACTCGA  
TCCCGGGTCCCCAGGATCACACCTGGGCTGCAGGTGGTGCTAACCCGCT  
CAGCCATCAGGGTTGCCCTTCATTGACTTTTAGTAACATCATTTCTCATCA  
GTATGACCTCAGGAGTCTCTGTCCAGAGCTTTTGTCACTCAACTGTGTC  
CTGGGTGAAGAAAGAGAAGATAAGATTCCAACACATGGCAAAGAGTCTAA  
ATTAGTCCCTCCTTGATTGGACATCACTTGTGAAGATGTGACCTCACAAAGT  
AGTTATTTCTGTAATATGAAAGGCTCTTCAAAGAAAAAGATAGATAAAT  
TGATAGATAATAGCTTGCCCTCCATGAATATATTGAATCAACTCTTGCCCTC  
TGCGCATATCTCACACCTGTTTCATAATGAACCTATTACATTTTCATTTT  
CTAGTTAGCTCTCTAGGGAGATAGGAGGTCTATGAGAAGAGCATAGAGCC  
CAACAGAACTGAGGTTGAATCCTGGCTTTGATATTTATTAGATAGGTGAT  
ACCTGAGCTTAGGTGCCCATAGAATTTCAAACCTTTTGATATTCAAATCT  
GAACTGAGATCTGTTTTCTTAGGATCTATTTCCTTCCTTTCTATTTCTT  
ATCTCCAGCAGCTCCTGACTCAAATCAGAACCCTCTAAATCATGATAGGC  
TTTCTGTTTCTTAGTCTACCATGATTTTTTCCACAAATGTAACCTATCAAC  
TTTCCAAGTGGCTGTGCTTTTCCACTACTAATGTCTTCGTTTCAACCCG  
TTCAATGCTCTGTAGACTCCCTTCTCACTGGCTGGTCTCTGTGATTCCAG  
CTTAACCATTCATCTGTCTTTGTAACTGGCTCTTGTGACCTCTCTAAA  
TACCAATCTGACCATGCTATGCTCCTCAGTAAACCCCTCAATGCCACCTT  
GCTGCATATAAGACCAATGCCAAATTCTCAGAATGGCCCTCATGTCTCTC  
TGATGTGGCTCTGGCTTGCCCTCAGCCCTGCACCGTGGGTTCCAGCCACT  
TGTGTTTTCTGAAAGGGTTGAGATGTTTTATGCTTGAACTTTGTACAC  
TTCTCCTTTTACTGAGAGTCTCCTCTGCAATCCTTTGGAAAGAAACAAGA

TGCCCACAAACAAAAATGAAGCAAACAGCAACACAATTTTGACTATTAAG  
ATTTACTCTGGAGTCTTCGGTAAGATTTTCTTATCGTGTCTGCACTAATG  
CTCTCTTCACTGTGTGTATATGTATATGAATGTGTGTGTGTGTGTGTG  
TGTGTGTGTGTGTGGTTAAGAAACAATTACTGTAGAAAGCAGTGGTCTCC  
CACTTTTTCCTGAAATCCTTATTTCTTGGGCTTAAAATGACATTTATTTTT  
AATTATCTTGCTCTTGTCTTTTTTGGTGCCTAAACTTGCCTCTTACATACT  
GTTCACTCCTGGATTTCCCTTTATGCCTTGATCCTATCTCATGGACTCTG  
TAATATAGCTACCACCGTTTTAGCTCTGAAAGCAGTCACCCTAATAAATG  
CCTTTTCTCCATAGGAAAAAAAAAATACATCAGCTCTTTTATTTAAGCCTA  
TAGCCCACATTTACTCCTTAATTACATTTAGTTGGGTGTGATATAACAAC  
ATTTAAACTCTTGAACCTTACAGTTTCTGTACTCTAACAGCACACCTCAC  
CACTCATAACTATCTTTTACTGGGAAAATAAGCACTGTACACTTGTCTC  
GTATAAACATTTTGCAAAACAACTCCTTTATGAATTGTGGTCATTATTT  
GACAAGGTCTAGCACACAGGGTAATTTCTGTATCCTATCTTATTCCAGA  
CATGGACATTACACTTGTGATCATGTGTCACCTCTGTGAGAAAGATGCTG  
CTGACTAACAACATCACTGTGTTTTGAGTAGGTTAGACTTGGGAGGAGAT  
GAGTTATACCAACTACGCGTACTTGCTTATAATGTAATGATGATCAAGTA  
TACACTAATTGAGTGGGATGAAGGTGGTGGACTATGATCCCTGAACCTGA  
ATCCAGCTGCTTTGAAGGGGATGCAGTTGGGACAGTTACCGAAAGAGGGC  
TCTTACCTAAAAATTAAAACCCACTCCTAGCCTAACTGATACATGACCAC  
GAAACTCTTAGTGTGCTGGGGTATAATATTGATTCTCTTATCACTAGTCA  
TTTTTGACCTTGACAAAAAGGGGAGAGGTGGTAGCCATCATGGTGCAGA  
AGAGGAGGCTGTCGGTGGTATGGAATAGGATCAAGAGTTGTTTGGATCAC  
TTCTGTGGATACGAGTGGGAAACATCTCTGCAGATACTACTCCTCTCT  
TCCCTACATGTTCTCCTGGTGGGTTTCATAAACTGTGTCATAGACCAGAG  
ATTATTTGATGGTAAAACCTAAAGCAGCGATCCTGGCAGGCTTTTAAAAG  
CATGGTGTTGTACAATGCTGTTTTACGGAATCAATATCTCCAGACACATC  
AGGTAAGCTGTTACTGCTTACAGACTTCCAAGAGCTTTTGAATGATTTAC  
ATAGAATTCACATGCAAGAGGAAAGCACGAATCTGGAACAAAAAATCTTC  
TCGTCACTATTAGGTCAACAATGTAATATTGTCTCTCTGGCGTCGTTACA  
CTTTTCATACACCTGAAGCTGCGTCACGGAGGCTCAACAACTATGAAGG  
AGCCTTCACTACACCTGGATGTATTGGTTCATTTTTCTTCTTGAGAGTCA  
CAAATGACAAATTAGCCTTAGGACAAGAACTTGAGTATACTGTTATCATT  
GTCATCATCACGATTAGAAATAACAATGACAAGAACAGTCACAAGGACTA  
AGTGTTATGCACTGAGCTGAATATGCAGCTATCGCGGGCTCTCGAATATA  
ATTGAAATATGTCACCAGATCTCCTACAATGACATATGTGACAGCAGCTT  
TCCTTTTGGCTTGGTGGAGTCAAGTTTGTGCTGAAGTCTCCATCGTCTT  
TTGTGAAAAGAATGAGGTGTACCATCATGAAGATGGCTGCTCTCCTTGA  
GAGCGACTCCACTGGCTAGAGTATGTGACATCATGTTCCCTGATGTCAC  
CCTGCATTCTTTGAGCATCACCGGCTTATACTTACAAAAGAGCCTGGAG  
TTCCGAGCTATGTTAAGAAATGAAACCCCATGTCTGGTCTTAAGCAGAGA  
GCTCTCTCTACGTGGCTCCTGCCCTCTGCCCAGCCTGTGAAGCATTCCAT  
CTGCCTATGTCTGTGAGGAGGCACACAGCCTCTGGGGCTGAACCAGTGGG  
GTCAAATAATGTTCTCACCATTTAGTGTAAATTAACCTCAACCACCCGTCT  
GTTGCAAGCCCCAGTGCAGCCAACACAAGCAAGAGTAGGCCAAGAAGAAA  
TTTCTCCTCATTATTAAAGCTAAATCTAAGCACTTGTCTGTCTGTAAAAA  
CAGAGCAAAGGGAGGAAAACTGAAACCAGTGCACGGGGTCTGAGGTTTCA  
ATAAATGTCAGGGAGCGTCAAGTCTGTTTAGATTGCAAATTATTGCTGGC  
TGACGGTCTTACCATTTTACAACCTAGAGATTGCTGTGATGGGGTGACGT  
GGTGAGGGGAGCCTCTCACATCACAGCCAGAGGGGAACAGAAGTTACCA  
AATACTATAACAATCATAAAACATTACAAGAGGGACTTAGCATTTGCTA  
AATTTAGTCTTTCCCTAATGCACATCTCAAGAAACAACAGCGCGTAACAC  
TTCACCTCTTCCTATTGGGTTTGATGAAGTGTTGGATTTGCCAAAGATTGA  
GACCTCATTTCACTGGTTTAAACCAATCTAAACTCCCCCTCATACCTCTCC  
TCTGCTCTGACACTTTGGACATCTGAGAGTGATAAAGACGCCTAAATGTT  
TCAAGGTGAATTAATACCTTACTACATATCCTGAAGAAACACACATCAAT  
AATTTGAGTGGTGGTTAAGACTGTTTTTCAGATGGATTAAATGAGTGGGC  
AATTACTGATTAAAATAAATGCAAGGCATGAGCATTCCAGCCCTGTACAT

GGACGAACACTGGTCAGTGGCTTCCCATTGGTGGAAGGCTTTTCTCATT  
GTGAAACATATCCATGCTTCTTGATATTTCTGTAGAAGTTTACTAATATT  
TTTTATTTCATTTTTCTTCTGACCAGCACTCAGTGAAGGTCTACTATGTGC  
CAAGTACTGAGTTAGAGACACTGAAAACCAAGAAAGTGATGGTCCCTCTT  
CTCCCTGAACTCAGAGTCAAGTGTGCTTATTTTAACCAAGATTCTTTTGG  
TTTTGAATAACTGAAAATCCCTCAAGTTAACTTAAGGCTAAAGGGAGAAA  
ATTGTTCTAAGGTACAGTGGGATCTAGAGATCCCAGAGAAGAAATATATC  
AGGACCACATAAAAGCTTGAAGCCTGCACTAAGGAGCTGTTAGAAATAA  
GATGACTTTTCTCAAATATCTAGTTGCGCCATCTCTACTTTCTCTTGTAG  
GTGGGCTTTATTCTTCTCCTTCTCAGTTTCTTAGTATTCATCTTTCTTTT  
TTAAACTCTGGATATAATTAAATAAGGGCTTTTCATGCAAGCTTCCCATT  
TCAGTTAACTAGTTTTTGTCAATCCCAACTCAGAATTTATGGAAGAGAGA  
ATTAGATTTGTCTATTTTGGGTCAGGTATCTACACTTGGCAGTTAATCTC  
AAGCCTAAGATTCAAGGTCTAAAATAGGTGGCTTAAATTTTAGGCATATG  
AGGTAAGCTGAATCTACTGATAGAGTTGGTTGATCTGATTTCTATATTGA  
TACATTCAAAGTGCCTTAAGAAAGAGGTTACACAGGGATCCCTGGGTGGC  
GCAGTGGTTTTGGCGCCTGCCTTTGGCCCAGGGCGCGGTCCTGGAGACCCG  
GGATCGAATCCCACGTGCGGGCTCTCGGTGCATGGAGCCTGTTTCTCCCTC  
TGCCTATGTCCCTGCTTCTCTCTCTCTGTGACTGTCATAAATAAATAA  
AAATGTTTTAAAAAAAAAAAAAAAAAGAAAGAGGTTACACATAAGGGATGTCA  
TAGAACTGTTTTGTGAGATTTAAAAAAATATTTTATTTATTTATTTATTC  
ATGAGAGACAGAGAGAGAGAGAGAGAGAGAAAGAGACAGAGACATAGGCAGA  
GGGAGAAGCAGGCTCCCTACAGGGAGCCTGATGTGGGACTCGATCCCGGG  
ACCCTGGGATCATGATCTGAGCCAAAGGCAGATGCTCAACCACTGATCCA  
CCCAGGTGCCCTGTTCTGAGAGCTTTTAAGGAAGACAGTCAGTGACCTAG  
TCAATGTCTGAAAAACAAGTCTAAGAAAGGAAAAATAATTATGGTCTCTG  
TCTCACTGTCCCATGAACTGTGATGCTATCTCTTGAGAGTAGCATGACTA  
TTTTTCATAGTCTATTATTTTTCAGAAGGATCTAGGTTATGCCAGGAGTA  
GCCAGAAATCACCTGCCATAGCATTGCAGCCCACTTTACAGGTGGCCTTG  
AAATGGAGTAGAGGAGGGAATTCCTGCCAGTGAAATTATGAGCCTTCTAT  
CTTCTGTCCACAGTGTCTGGGAGGCTTGTTGATCTGAACTCAAAATCTC  
CTCCATTTCCCTGGGGAACAGCCAACAGTATGACTAAATGACAAGTACCAG  
ACTGCCTTAGTTGGGAATCCCAGAAGCAGAACTTAAGTCAAGGATTTGA  
GTGAAAGTATTTTATTTGAGGGACAACAGAAAATACCCATAGGAGATTGA  
AGAAGATAGACAAAGAAGGGAATGCCAGCCAAGAAAGAGTGTGTTACCAA  
GCCAGTTACAACTGTGGATAAATGGAGATTAACTCACAGAGAGGAATTAG  
GGATCAGTGGAGAGCAGATGACTTAGAGTCATCCTATAAGAGTGAGGTCA  
TACTCCACTCAATTTTGTTTTAAACACTCTGACAACTCCAGTTTGCCCT  
GCTGGCAGTGAGGCACCTCCAGAAGTGACAGAGAGCCTTTGGACAGAGA  
AGCGCAGGTGCTGGCAGGTGCACGGAAGTGGAAGTGTGAGATGTTGGTG  
GGCACCAGGACAGTCTACCACAGGCTGACCCTTGACCAAGTCTTGTCAC  
GGTGTGCCACATCAGCTTCATCCTGTCTTGTGTCAATGCTTCAAGGTGGT  
GGCCAGGTGCGATTTATTAAATAAATAAATACATTACTTCAAGCAGGAGG  
GGTGGCAGGATAAGCCACAGTCAGCTCCGTTGGTCTCAAGGCTGCACTT  
GACATTCATTTTCTTCTCTCTCCCACACATTTATATATTTCTCATTG  
TGGCCCTACATTTCCACTGGAAATGTACTGAGACTCAGTAGAACCTCAGA  
ACTTCTTCCCTAAATAGCAGAACCCTGGGTTACCAGGATCCTACCAGGCT  
GCCATTGTACACACTTAGTCTCATCCCTAGGTATAGAAGCACAAAGGAAG  
CACTCAGTTCCCTGGGGTAATTCACACGTTATTCTTGATTCCGTCCTAT  
GACATTAGTTCTTTGTGATAATTAGAGTCAATTACTCCTACCAGTTGGGC  
AGCAAAACATACTCCAGTGCAAGAGAAAGGCCCATAGGCAGAATGAAAA  
AAAAAAAAGAAAGAAAGAAAAGAAATGAAAGCAGGATTTGGTTGTTGGAAG  
CTGATAGTGTGCATTGAAATAATAAGGACCTTGGGATGTGAGCAGAACGT  
GGACGGATCTGCTACACAGGCATAGAGGAACACTGTGATATTTTGCTAAA  
TGGACAAATCTGTGGACTTTAGAGATGATTCATGACAGGAGTTTTGGGA  
AAAGTGTCTGTAGGTGGGCTTACCCAAAATTTAAAGTTAACTGAATATG  
GATACTCACCAGAAGATCTCAGTAAAGGGACTCTTATTTAAACACAGTGC  
TTGACTCATGCTTCTATGGAAAAAGAGCTCAGGAAGGGGCAACATTGTTA

GCTGAAGTGATTGGCTGGCTGTCAAGGGAGAATGTCTGGGACAAATGTAG  
ATGGCACTTGGAAGTCTGGGCCGAGTCCTTGCACTGAGGGAGGCCAG  
AAAGTATCAGAATTAAGAGCACTGGCTCAGGCACAAGGCTTTTCATGCCC  
AAGTCCTATTCTTGTGCAAGTCAGGACAAGCTAGGCCATGCTGCAGGTAT  
GAACCCACAATTCCAGCCTCTGAAGCAATATATTTCTCAATATGTCACA  
ATCCATGCAGGTCGTTAGAGCTTTAATTATGATATTATTATTATTATTAT  
TATTATTATTATTATTATTAGAGCAGCTCTCCCTTACCTTCACCTTACTT  
TCATTTCCACCCATCAAAATTCTACTTAACATCCAAATTTCTAATGAAAT  
TTTATTCTTCCGTGGAACATTCCGCTCTCCCCACTCCATTACAAGAAGC  
AATCCCTCTTGTCTCTTGACTCCGTGAATTTTATTTTGTATGTAATACCT  
ATTAAGTTCTTTGATAATGGATTTTTCTCCACTCCCTCTGTGTAAGGGT  
AGGGATGTAGCTTAGACATCATTTTATCAGTCAGAGAAAAACACATAAG  
AGATAACCAAGCATTTGTTCATATAATGAGTACAGTTTTAATGGCAAGTGTA  
CATAACTTTTGCTTAAAGACTCCTTACTTTCTGTCCATCGAAAGATGAAT  
GGATAAAGAAGCTGTGGTCTATGTATACAATGGAATATTCCTCAGCCATT  
AGAAACGACAAATACCCACCATTGTCTCGATGTGGATGGAAGTGGAGGG  
TATTATGCTGAGTGAAGTAAGTCAATCGGAGAAGGACAAACATTATATGG  
TCTCATTCATTTGGGGAATATTAAGGAGTGAAGGGGAATAAGGGGA  
AAGGAGAGAAAACGAGTGGGAAATATCAGAAAGGGAGACAGAACATGAGA  
GACTCCTAACTCTGGGAAACAACTAGGGGTGGTGGAAAGGGGAGAAGGGC  
CGGGGGTGGGGGTGACTGGGTGACGGGCACTGAGGGGGGCACTTGATGGG  
ATGAGCACTGGGTGTTATTCTATATGTTGGCAAATTGAATACCAATACAA  
AATAAATTTATTAATTAAGGAGTATATAAATCTTACACTAAACGCTAG  
TGGTAAGGCATAAGGAACACCTTTGTGGATATGTGTGCGTAGAAGGCACT  
GGCACTTATTCAGAGTAGAGTTGGCACCTATCTATCAACATAAGGGAATA  
TTTCCGTCTCTGCTACCTCATTTGCCAGCAATGCTATGTGTGTCAGAGCATG  
TGTTAATCCATATGACTTGTCTCTGAACCGATATATCTGCTTTTATAC  
CTATCAGAAATTTTTTAAATGGCGCATTTTAATTTTCTATTCTTGTCTC  
ATGGTACTATTTTTCGTTCTGGAATGTGATGCATGTGTGCATTTTCAGGAA  
TATTCTGCTACCTCTTGCAGTGTGAATGCTTGACAACGATAGCCCATGAT  
TAAAGACAGAACCAACACAGAGTTAGCAGGGTGAACATTTCTGCAGAACC  
CAAGGGAAGGTTGTGATCTGGGATGTTTGAATGTTCTAGTTGTATTTCTT  
GTCGTGTTGTTTTGAAAAGGATTGAAATATTTTCTGCTGTCTCGTGGC  
CTTCAAGTTCAGAACTGGTTTTATCTCTACAGTCATCTCAGCTTCATTCA  
GCTGCTACATAGATAAAGCAGTCCCGAGTTTTATTCAAGAACTCATACAA  
AATATTCCTGAAAATGAGTTTTAATCTCATCTTCCCTCTTCCCTCGTC  
CTGGTTAATCTGGAGGTAACACAGCTCGTGACTCTCTTGCTGTTAGCAA  
CTGTGCATAACCGATCGTGTAGATTATTCTTCAGATATTTTTTGGTGAGG  
AATTTCAAAGACCTTCTGGGGGAAAAAGATCAACTCAGAAGTTACAGTAA  
TCTTACTTTGGCTCCTTTTCAGTGGTTTCAACCCTTCCACCGAGATGTCCA  
GCTTGTGCTTTCACTTGGATTCTCTCTTGAAGAACTGCGCTAAATTGGC  
AGCATCCATGATACCATCTTCTACAGAGTGGGTGCTGTCAAGGGTAACT  
TCAGAACATTCCTTTTTTTTTTTTTTTTTTGCTCCCTTTCCCTCATGG  
ATGCCATCGGAGGCAGAAAGGGCATTCACTGCAGTTTTATAATTTGTTGG  
AGGAGTCCACATTGCTTTGGCACAAAAGGAATATAGGAGCACAAAGAAAT  
CAACACAGCACACACAAGTCCATGGATTTTGGGTTTGCTGTCGTCCAGGA  
CGGGCTTGCAGGACGTGTACGTACTTAAACACAGCATTTTGTGTTGAAAG  
CGTATTCAGTTCTGTTATTCCATCCTATAGTGTGTCAAATTTTTTGAAG  
CAAAACCCCTAATGCTCTCCTACCTTCTTAACATGCTCTTCCCTTTATAA  
ACAAAAAGACAAGGGGGAAGGTATATGTTGGAGTGGAATATGTCTATC  
TGTTCTAACACGCGCGTAAAGTAGTAAATTTTAAAGCTATAACTAAGAAT  
TTCAACACAGTAATCTCCAAGAAGGCCCTCTGTTTTCCCTATGGCAA  
AGAAAAGCAGCCAAGTTTCTCATGTTTCAGTATCTTGAAATGGGCTCAGTT  
TTGATCCAATGGTATGTAACCTAATGCTTGTGGAATATTGCTTAACCTTG  
CCAAGCGATCAAGCATAGTGAGTTGCTTGTAGAGCATGGGGCAGACCTTT  
CTGGAGGCCTTATGTCAGGAGGGTGAATTTCAATCTTTTCATGGACTTG  
TCTTTCTCTTGTAACCTCTTGCACCTGGATGTCTGAATGTCCACCAGCTA

ATACATTTCTTCTTTTTCTGATTGGAAACATGACTACACAGATCTTTTT  
TTTTCCCCCAAACAAGGGAATTTAAAGGTTTTAGCAGAATAAAATCTCTC  
TGATCCCATTTTTGTTTGAGGTAGTTCCATAAGGAGAAGGGCAACAGAGAG  
AAGAAATGAAACCAGGAAGAAAAGGAGGAGAACTAACATTTGTTGAGCA  
GCTACTATGTCACACACTGTGACAAGCACTTTATATGTCATATCTTTATA  
CTTAGAAATGCTCCATGAAGTTTCTGTTAATGTTGTAGATGAGCAAGCCA  
AACTCAGAAAAGTTAGGCAAATGGGTCAAACAGCAAATTGGAATCCAACA  
ATTATTTAATTGCCTCTCACCTCTGCCACCCCACTGTATGAGTCTTATG  
ATATGTTTTCAAACACCAGATTTTATCAGCACAAAAATATCCAGCTGACAT  
ACAAAATAACTAGACACAATGATTAGCATAATGAAGAAAAGTAGCTTGTG  
GTTTGAATCCTTTACTCTCCACCAGTAGCTCTTTTACATATGCACATTC  
AGGGCTTGGCTGGACATTCCAGGGTTATCTCCCCACTGCTGACTGGTAAC  
CTTCTTTTCTATAACATCTCCCCAATGGCAGTTCTACTGCCAAAGCCAAT  
CCATCAAGTTTTTCAAGGGTTGCCAAGGCTTCTCATTTCATTCAACAGTCTT  
TCAACAAGTTTTTTATTGAGTTCTTTATCAAGCAGAGTCTGGTGCAAAAG  
AGATCATTGCAGATGGTACAAATGAAGAGGTTTTAATGAAGGGTCAACTT  
AATGGTATGTGGGCAGGGTTACAAGTAGAAATCTAGAGAGGATGCAGAAC  
CCAGAGATTAGGAGCAGCAGGTGGTCATTACAGCCCCACAGTGGAAGAAA  
GTAGGAAAGATGGCTTTTACCTGAGGAACAGAGTACTGGCAGGTGCTCTC  
TAGTTGTAGAGAGACGCAGCTCCTGCTGGAGATGAAGGACTGAGGCAGTG  
ATGGGGCAGGAAGGAATACCACAGCCCCTGTCTCCTCCCTTACTCCACCA  
TCATCACAGTGCCTCTCATTGGCGGAAGCACCCAGGACTTTATCACAGTA  
CAAAGGGCTGAAAATGGATCTAGGGTGAGTTGGGGATGAAGAATCACTTG  
TCCAAGTGCCCTTGGGTGTCTGGCTCTGACTTAACCACTAGGGATGGAGC  
AGTGAGCACATCAGAGAAGGTTCTGCACTCATGCGGCTGTGCTCTAATGC  
AGGATGGAGACAAAATAGGAAAAAAAAAAAAAAAAAGACGGATGCAGGGGAGAG  
CCTTAGTATGTCCCCTAGTGATAAGCACCAAAGAGAAAAATAAGGAAGCCA  
GCAAAGGGGGCTTGAAATGTGTGGAGGGTAGGGTTTTAGATATGGGTGGC  
CAGAAATTTCCCCCTTTTACCCCGAAAAGATGACATTATCATAGAGACCT  
AATACAAAGAATGATGGCATGATCGGTGCAGGGAAGGAGCATCACAGGC  
AGTGGAAGAGCAAGTGCAGAGTCCCTGGGGAAGGCAGGAGCCTGGCCTG  
GTACCATGCAGCTGCAGACAATTGAGTGAGGAAAGAGGCATGCGAGATGA  
AGTCAGAGCTTGACTCAGAAGGTCTCCTTGACTCATGGCTTCACTCTGCA  
TCTACTGGCTTCACAGTCGTGTTTCGTCTAGGACCAGACGCTATACAGAG  
GAGGAGGTAAAATGCTGATAGCAGAGAAAAAGAAGCCGAGAGATGCAAGG  
TGATTCATCCAAACCCATCTGGTACAGGCCAGTTCTCTTGTGCTAGGCCA  
ATTAATAGCACACCCTCTGTTTATATATTGGTTTTTTGTTGAGTATGATGC  
ATATTCCTGTCTATAATTAACCTTTGGCCAGGATGTTAGGACATGATAGACC  
ATAGCGACCAATGCAGGAGGTGCACTTTAGAAGGGAATGTGGCATTATTT  
AAGTTTTTCCAGGAGAAGCCATGAAATTGGAATTGACTTCGCTTATCCTG  
TACCCTGAGCCTTTTAGGTCTTCTCTACCCTCTAAAAATAAATTTAATGG  
CACATTATAAATACTAAATGTATGTATGAGCTCCTCATGACTAGCCCC  
CGTCACCTCTCACTTAGATATATGTGTATGTGCTCTATATGCATATGTGT  
ACATATATACATGTTTGTATGTATATATGTGTATATCTGTATCTGTATAT  
GTCTATATGTGTACACCTGTATACATGTGTATATCTGTATGTAGTAGATA  
TCGATTACATATAGAGATGTCTTAAGCTTTAGCTATATAAATGTCCTTCC  
CAACCTTTTTTTTTCTTGACAAATTTCTGTTTGGCCATCAAGATTTACAG  
CTCAGGTGTCACTTCTCTGTGAAACTTTCCCATATAAATCCAGGAATCT  
TGGCCAGATTCTTCATGATCTCATGGCACTCAGTTCAGACACATGTTAGA  
GAACTGTTGATGTGATTTACAAGTCAGTGATCTCAACTAGATTGTGAGC  
TTCTTTTTTTTTTTTTTTTTTAATTTTTTTTTTTTTTTTTTTTATTTATG  
ATAGTCACACAGAGAGAGAGAGGCAGAGACATAGGCAGAGGGAGAAGCAG  
GCTCCATGCAGGGAGCCCCGACGTGGGACTCGATCCAGGGTCTCCAGGATC  
ACGCCCTGGGCTGCAGGCAGCACTAAACCGCTGCGCCACAGGGGCTGCC  
AGATTGTGAGCTTCTTATGGCCAAAGATGCCTTATACCTTTTGTGTTCC  
TGTCTCGACAGGGGTATGATACATTAAAGTTGCTTAGAGCAGACTGTTTT  
TAAAGACAGATGATAGATAGATAGATAGATAGATAGATAGATAGATAGGT  
AGAAGATAGATAAAATGAGCAAGCCTTATTTAAGAAATATATATACAACG

TATATACATTATATATCTATATAACATATATACATTACATACATTATCTA  
TCTATATAAATATCTATATGTTAAATACATAGGGCTTATGTTAACTTGA  
GTTGGCAGGACTGGTATCCTCAACAGTTCACTATTAAGAGGATATGCCAA  
TTAGATCGTGGATCATGCTATGAAATTGGTTCTAGTTTCAATTTACTAAA  
AATTACAGAAAACAGATACCTTGAACATAGATAATTTGTTGTTGCCCATG  
AAGCAATCACAGAATACTCCAGCTTCCCTCAAATCCACTGGCCTTGCTGA  
ACCTGTCATCTTGGAGGTCTTTGTGATTTTATCTTATCTCTATTTGAGAG  
CCATAAAGATGAGTAACTAAAAATGTGGTTAATAAACCCCAGCTGGGCATT  
TTCTAGGTGAATAAACACACCAATTTTTTCTACTGTTTTTTCATGTGGA  
TGATGAATAGGACTCACAACCTTTGTTTTTCATTATAAGTAGAAAAGTAGA  
AATAATATCAAGTTATGATACTTGAGGTTGTTATAAAGTACTTTAGAGAC  
ACCCTTAAAGTTTCAAATAATTATAGCTCCAGTAAAAATTTTTATGACTGC  
CTGTGGATTTTCATGATCAAAGACAAAGTAAACAGAGAACACTTTTTAGGC  
TGAAAAGATATTCAGGCCCTTATGATTTTTTTGGTTGGCCCTCCCTCTATT  
CTTAAAAGAGTGATTAATAGTTTCACAGTGTAAGCAGCCATATTTGAG  
ATTAGGTAATTGAATGAAATTGATTCCCGAATTTAATCTTCATGCACCCC  
TGGCATGCTGCATAATATATTTTTATTGGTGATTAATAAATACAATGAGCTC  
GATATAAGGGAAGGTCTTCAAAAACCTTCTAGTTACCCATTTTCATTCCAAT  
CTATTCCATATATTTTCAGCTCTGTGTTTTTCTTTTGCTTAAAAATATGT  
TATTAGTACAAGTAGTGGAATTTGAAAAGAGCCATAGACCGTATTTAGTA  
CAGTTAATATTAATATCCTGATTTTAATAATTGTAAGTGTAGCAATATAAT  
AGAGCGTCCTTGTTTTAGGAAATAAAGTGTATATGAGTCAACAGGCAA  
CATATCTTTTTCAAAAAAATATTTGTGTATGTGCATGTACATATGACGTG  
TGTACATCCATATACACATATATACATGTCCATGGTTATACATATATCCA  
CACACATATATGGGAATAGATAAGTGCACATGTTTATGCATGCATACGTA  
TATGGGCAGATGAAACCCATATATATTGAATATAGATACATGAAAAATAT  
TTTTTATGCATATATAGACAGTATATGAATGTATATACATATGCATATTT  
TACCCATTTGTTTTATCACTAAACATGCTTTACATTTTTTGTTTTACGT  
AAGAATGTTTACATATAGGGAATCTAAGTGAGTAATGTACAAGAATCCTT  
TGCACTGTTTTGTAAACCTTTTGATATGTCTGAAATCACTTCAAATAAAA  
AAAAAATCAGGGTATTTTAAAGCATGCTGAAAGTGCTTCATTCTACCAA  
GTGTTCTAGAATCAGATGGAAGATCGAATCCACATATGAGATTTAGCTTT  
GTGCGAAGGAAAATTGTGTTTTGAGACTCCAGTTGCATTTCTAGTTCCA  
GTCAGAAATCTACGAAAGGCGTGTAAGGAAGAAGAGTGAAAGAAGCTTA  
TGCAACCCAAAGTAGGAAAAAATATGCATATATTATATACACATAATTCT  
GATCTAGAATGGGTCCACTCATATTTTCTAGTTGAGATAAAATTCACATA  
ACCATTTTAAAGTGTATAATGCAATGGTGATTGAAATGGTGTACATTTGC  
AATGTTGCATGACCACTGCACATATCAAGTTAGAAAAATTTTTATCACC  
TCCCAACACCCCCACCAAACAACAAGCAAACAACAATCACAAAGAAA  
CCAAACAACCCATTCCCTGTAAACAGTAACTTCTCAGTCCCTGGCTAT  
CACCAATCTGCTTTCTGTTTCTATGCATTTCATCCGTTCTGGATATTTTCG  
ATAAATGGTCTCAAACACTTTGTGGCCTTTTCATCTGGCTTCTTACACTT  
AGTATAATGTGTTTGAAGTTCATCCATGTTATAACATGTATCAGTACTCT  
GTTCCCTTCTACGACTGGGTAATATTCTATTAATACCACATTTGGTTTAT  
TCACTTATCCATTGAGGGGGGTGTCTGGATTGTTTACACCTTTGGTTATT  
GTGAATTGTGCTGTTTATGAACATTCGTGTACAAGTATGTGTTTGAGAGCA  
AATTTTCGCCCTCTTTGGTGTATATACCTAGGAATGGAGTTGCTGGGTCAT  
ATGGAAATTTCTTTGTGTAACCTTTTGGAGGAAGTGTGAGATGATTTTCCCA  
CTAATATTTGATGTTTAAAGGAAGACACATGAAGTTCATGATGCAGATAATC  
TCTGAATTTAAGCAAGTGTGTTGTACATCCAATAGTTGTGTAAGGGCATGT  
CTCATACAAACACCATGAGCAGGACCTGGACATTTCACTTTAACCTGTAC  
TAAGCCCTCAAAGAATTTCTTATTTTGGTATCAGGAAATTTAGGGCAAAC  
GAGAAATTTCTAAAGAGAGGTAGAGATAAGGGAACATGGAATCGAATCGC  
TGTTTTGAAAGGACACAGTAAAGAAGAACAAAGAAAAATGAGTGATCAATC  
CGGAGTAGAGTATGAGGGTTCTATACGTGATCTACGGTGTTCCTCAAATT  
TGCAAACCTGTTTGCCTTCTGACTCATTTTAAAGAGCTGCACAGGGAATCA  
ATAGAAGCATCTTATAAAAAAGATTTAATTATACTTTTTATAGAAATATA  
ATTAACATACAGTGTTATATTAATTTTAGATATATAATGTAATGAGTCAC

AAATTCTGTATATTACTCAGTGTTTCATCATGGTAAGTGTACTCTTAACTC  
CCTTTGCCTATTTACCCATCCAGTCACCTACCTCCCTTCTGGCAACCAC  
TGGTTTGTCTCTGTATTTAAGTCTTTTTTTTTTTTTTAAAGATTTTATT  
TATTTATTCATGAGAGACAGAGAGAGAGGCAGAGACACAGGCAGAGGGAG  
AAGCAGGTCCATGCAGGGAGCCCGACGTGGAACCTCGATCCAGGGTCTCC  
AGGATCACGCCCTGGGCCGAAGGCAGGCGCCAAACCACTGAGCCACCTGG  
GCTGCCCTCTGTATTTAAGTCTTTTTGTTTGTCTCTTTGTTCTGTTTTTA  
AGTTCCACATATGAGTGCAATCACATGGTACTTATCTTTCTTTGTCTGAT  
TTATCTCATTTAACATTTTACCCTTTAGGTTCCCTTCTTATTTTTGCAAAT  
GGCATGATCTCATTCTTTTTATGGCTGAGTACAATTCTACTGTGTATATA  
TACACCACATTTTCTTTATTCACTCATTTATTGACAGACACTTGGATTGC  
TCCCTTATCTTGTCTATTGTAAATAATGCTGCTGTAAAACCCATACAGGT  
ACATATAACTTTTCAAATTAGTGTTTTTGTCTTTTGGATAAGTACTCA  
GTAGTAGAACTACTGGATCATATGGTAATTCTATTTTTATTATTATTTTT  
TCCCCAAAGGTGGCACACAAATGGCCAACAGACATGTGAAAAGATGTTTA  
ACATCACTCATCATCAGGGGAAATGCAAATCAAAAGCACGATGAGATATCA  
CTTCAAACCTGTAAGAATGGTTAGAATAAAAAAAAAAAAAACAAGAAGTA  
ACAAGTGTTGGTGAGGATGTGGAGAAATAGGAACCCCTCGTGCTCCATTAG  
TGGGAATGCAAATTGGTGCAGCCACTATGGAAAACAGTACAGAGGTCCCT  
CAAAACATACATCTTAATCACACTTCACATATTTCTCAGTTTGGTCTATT  
TTCTGTTGCTTTTAGAGTGGCCCCAAGTGATATTTGGCTCCTCTTTCAA  
GTTGCCCCCAATCCATCACACCTTCTCCTGACCTCTAATAAAACACAA  
AATAAATATTTTCTCCCTAAGGAGATACAAAAGCATGTCCTACATGTTTG  
AGCAACAGTCTTCTTAATCTTCATTTTAGTCTCTTGCTGGTTGCACTGAT  
CTCTCAGACTTCTTCTTCCAGTCGTAGAATTCATCCCTGAGCCTTGCTC  
TGTGTACTCACACTACCTAGAAGTCCCAAGTTTCAACTTAAATGCATT  
CCACACTCAGACAACTCCCAAGTTTTTGTCTCAAGCTAGGACTGCCCCCT  
CTAAATCCCAGAGTTATCCACCTGCACAGGAGACTCTTCTACTTGGATGT  
CCAACCTGACACTTAAAACTTAATGTATCTAATGCTTTCCAGACCTGCTT  
CTGCCCTGTCTTCCCTGTTGGTGGACACTCACCCGTTAGAGTCTAAGCC  
AAGTATTATGTCTTCTTACTCCCCACATTTAATCTGCTTGCAAATCCTTT  
TGGCTTTATCTTCCAAATGTATTCAGATTCCAACACTTCTCGCTATCTTT  
GTTCAAGTCACCGTCATTTCTCACCCAGATTAGCTCAATACCCCTCTAGC  
AGGTCACCCCTGCTTGGTTATGTTTTCATGTTTCTGATCACCTATAATTTT  
ATCAATTGGGCAGCCCGGGTGGCTCAGCAGTTTAGTGCTACCTTCAGCCC  
AGGGTGTGATCCTGGAGACCCAGGATCGAGTCCCACGTTGGGCTCCCTGC  
ATGGAGCCTGCTTCTCCCTCTGCCGTGTGTTTCTGCCTCTCTCTTTCTCTC  
TCTCTCTTTCTTCTCTCTCTGTGTGTCTCCAATGAATAAATAAATCT  
TAAAAAAAAAATCTTATCAATGAAGTCTTCCCAAACAAGTCTATTTAAAT  
AGCATCCCAGCATTCCCTAATCCCATTCCTGTTCTATAAACTTTACACA  
TTTAGACAAACATAGCAGCATACTTCTTTGGATATCTCAGCTCTCCCTAC  
TTAGAGTGTGAGCTTCAAAAAAGCAGAGATTTTTGTCTGTTTGTTTATT  
ATTCTTTCTTCTTCTTTTTTTTTTACTTTTCTTTTTTTTATAAATTTATTT  
TTTATTGGTGTTCAATTTGCCAACATACAGAATAACACCCAGTGTTTCATC  
CCATCAAGTGCCACCTCAGTGCCATCACCCAGTCACCCACCCCTGC  
CCACCTCCCCTTCCATCACCCCTAGTTTCATTTCCCAGAGTTAGAAGTCTT  
TCATGTTCTGTCTCCCTTTCTATCTAGAGCTGAGATTATTGCCCAATACA  
TTATAAAGGATTATTTAAAGTATTTTTAGAGATATAAATGAATGAAAATG  
TCTAGGATACTTGCAAACCTCTTTTGTGAAAATAATATTCATCTGAAA  
TTAAATTGATATAGTTAAGTAATCAGTCATGTTTCATGTATTTAAAAATA  
TTTTAGAGTCAGAAGATCCTCAAAAAACAGGAAATCCTTGATATATGAAA  
TTTTTCAGGGCCAACAGATACCTCCTGAAGAGGCTTAATTAAAGGGTGCCT  
ATTCAAGTTGATCTGTGGCCCTCAGCAGTACAATTTAAACACACTTGTA  
ACCTCTAGTGAAATATCCCTGGACTCGGTATCTGTAGTCTGGGAATATCA  
TTGTGTCTTTGTGACACACCAGTGGTGTGACAATTGGGCAAGTTGCTTGG  
TCCACTTTGAGCTTAAGCTGTAAATTGGTGATGGTAGTAATAATAAGGAG  
CTCAAGTGATATCCGTGAGTATCAGCTGAGATTTAGGTATATTTTGTAA  
AATCTTAATCATGTTACGAGTATAAGAACTTGAAAAATGTTACAGCTA

[illegible]

TCCAGAAATCTGAGCCATTTTCTCTCCTGTTTCCTTTCTCTTATGTCCAC  
TTGAATTATCTTTCCCAACCTACTGTTTTTCCCTCCTATTGTTTCACACTG  
TGTGATTTTGATACTTCCTGTGGTTCTTAAGGAGCTGAGTTGGGTGGGATG  
AAATGGGGATGTGACCCCTATTTTCAGTAATTTATAGGCCTCCATGTTTAG  
TGAAGGATGAGGGTGTCAATTGAGATTGGATTCCAAGAGCTTACTTACCTA  
TCACCAATCTACAATATTCATTTTTTGTTCCTTTCTCACCTCAGGATTT  
TTAAACTTCTAATATTGGATGTAATCAAGACTATAGAGCAACCCACGGGT  
GTGATGTTTCTCCATCTAACGCTGTACCGAATCATTAAAATCATACCTTT  
TTTATTCTTTGGAATAAAGAATGCTTCCTGTGAATTGAAATATTAATATT  
TAGAAAATTAGAAAGAAAATCTATGCAAAAATGAACCAGGCACAGTAAAT  
AAAACAAAGTGGATTAGTAAGTAAACAATAATATTGTGTTGACCTAAAGCA  
TATAGTGCATTACTATCTCCTGATAGCCGCTTAGGTCAGGGTATTTCTCA  
CCAAGGTGTGTTGGCCCGCAATGCATTAGGTACAAGGAGGTGCATCTCCT  
TCAAAACAGAGGGCTCTTCCTAGTTCGTATTCTCCTGAGGCTCTTCATAGC  
TCCTGGCATGTTGGTTTCCCCTTGGGAGTGACTGGAGAAAAAACTATTT  
ATTTCTCTCCATTTATGCAGTACTATTGCCCTCTGCTGAGGTCAGCATTG  
GTTCTATTCTTGAAGCTTTTTTTGTACAGATCCATCATTTCCATGATGTT  
AGATGAGCTGACATTGGTGTCTCCTGCCTAGAATTCCACTCCCTATCTCA  
TCTATTTGGAAAATGCCTACTTATTCTTCAGAGGCTGCTTCAATTTCATC  
CTTCCTTTCCCTCTCCTTTTTTATCCCCCTTTTTTCCCTAGGTTGAATCACT  
TTCTCATTTGTGTTGCCCTAAGTCTGTGTGTATCACATTGCACTATAAAT  
ACTTGTTTTTCTCTACTACGAGACTGTACTTGAGGGAGATTCTGGCTTAT  
TCATTCTTTTTTTTGTATCTGCAGCACCCAGCAGAATGTAAGGTCTGTAT  
TAGGTTTAGGATAAATGTTTCTTGTCTGCACTGAGGTTCTATATCTCTG  
ACTATGTGCTCCTTCATTCAAAGTTATTAAATATTATAACATTTATAATT  
TACATACAACACAGTATTGATCTAGGAGCCATAACAGTGGATTATCTATC  
ATTGTTTTGTAACTCTTGGGTATCAATTTTATCATCTGTCAACTAGAGGA  
ATTGATAGATTTCATTTGTTTTTCATTCATTCATTAGTTTATTCATTAAT  
TCATTCAAGATAAATTGATCAAGTGCCTGCTTTGCCTTGGACATTGGACT  
AGGCAACTTCTTAAGCATAAGATGCCACTTTTCTGGTTTTAGTTTAAAAT  
ACTACATATTTCAAGTTGGAATATAAAAAAATTTGAATCTGTGTAGATAGT  
AAATTTAACAATGCTACTTTTATAAGCTGTGCTACTTAATTTACAAATAG  
ACACTGTTTTGAATATAAGTCAAACCAAGATAGTAACACTTTGTTTCTGA  
ATCTCATTAATGCTTCAAATGTACTATTTGTATCAACTAATCTTAAATA  
TCATTTCCCTTGGGTGATCACAGAGTAGGATTTCTGGGTTTTATCATAATG  
TTTGTTTTACCTTTTTTAAATTTACCAGAATATTGACTTAATGTATATTTT  
TTATATTTAGACAGTTGTAGAAAAGTCTTTGGGTTGAAGATCTATACGTTT  
GTTCAACAGATGTTTACTGAGTGTCTAATATGTGCCTACTGTTAAAATAT  
ATGCCTAGGAAAGAAGGTCAACAAAAGGGACCTCTGTTTTTGAGAAGTTT  
GTAGATCTGAGGAGAAACATAGATGTAAACATATGATGATAGAAGAATAT  
TGAAGTTTTAGCTGAGAGGAAGAAATGTGCTCAGGTTTGGCTGAGGGTAG  
GGTGGGCACAACAGACTTGTGCAAAAAAGTCTTGGTACTTGACTTGGTA  
CTTGTC AATAGATGGTACTTGAGGTGAGTGTCAAGATGTATGTATGCCCC  
CAGGCTGAAAATGCTGGGAGGAGGGCGAACAGTCCAAGAACAGGAAGCAG  
GATGAATAGTTGAAGCAGATAAATGTGCAGTAATACGTCACATTTAGGCA  
ACTAGGTAATACGTCATCGTGGTTAGAGAGAAAGAGACAAGCTGGGTTGC  
AGGGATGCCCTAAGGCTGTAGAGTAAACATGGGCAGGACTTGGTAGTTTTT  
TGGCTAAGATGCAAGAACATCGACTTTACCCTGTACATAGAGGGAAATCC  
AGGAGGGTCTTATGCAGGAGAGGAAGGGGATAATTTTCAAAACTACTAG  
AAACATAAATGTGATGAAAAAATTTGTGAAATTTTAAAATCTGAATTTG  
GAACTTAGACATACTTGTGTTTTCTTCTATGAGCATTTTACTAAGTTA  
TTTCTTTTCAATGAATGGGAATTATTTATAATACTCAAATGAGATCACAC  
TGTGGAGATGAAGTTGTGAATGGGATCTTTCCTCTATCAAAATCTTTTT  
ACATACCTAGGAGTAGGCCTTTATTAAATTACTGAATTCTACTTTTACTT  
CTGGAGAAATAGCAATCCAGTATTGAAAGATCACCTCTTAATGGAGGTTA  
AAATAAAGGCTTGGGTTTTGCTCCTCAGACTTCAGTTTATGAATATGAGG  
AGGGAAAAGAAAACAGAGAAAACAAAACATGTAGATTTAGACATTTTTAGT  
GAGGAAAATGAATATTGATTAGCTATATTAGCTTTAAAAAAAAGTTTATT

TATTTATGAGAGAGAGAGAGAGAGAGAGAGAAAGAGAGAGAGGCAGAGACAC  
AGGAGGAGGGAGAAGCAGGCTCCATGCCGGGAGCCGGACGCGGGACTTGA  
TCCTGGGACTCCAGGATCATGCCCTGGGCCAAAGGCAGTCGCTAAACCGC  
TGAGCCACCCAGGGATCCCCAGCTATGTTAGCTTTAAGTGAAAATATATC  
AATTGCTGATTTTTTAAATGCCAAAACCACAGCAGTTGCTCTAGTACAAA  
CTAGCTTTTGTCTAGCAATTATTCAAGTTTTTTGATAAATCAGTTATAAA  
TAGGAAACACCAGAAGTCTGAGGCCTTCTGAGCTAACAGCATCAGATCTGTT  
GACCATTTGTTGAGAGATTTTATATCATAAAAATACTTGGAATAAATTAA  
TCTTTCTTCAAGAGAAGAAAATAAATTTTCATCATGTTGCCTTTCATTCTGA  
ACAATGCAGTGACTTCCTAATTGATTTGTGATCTCAAATCTGTCTTATT  
CTAATCTACCTATGCTGTGTTAGTTACAGAGCTCATCAATATGAAATCAA  
ATAAACCTCATTTTTAATCTTGGTTCTGCAAGTTTCACTATATGAGTCTC  
TGTTTTGTTAATTGTAAGACTGAAGTAACACCTATTTCAAAAGAATGGGA  
GATATTATAAGGTTTAAATGGAAATTCTTAGGTCAAGGGTCTTAGGACTG  
GGACACATATTTATTGAGTAAAACAATGGCACACTTTGGGTAATGCTTAA  
CTTTTCAAACCTAAGTTTATTTTTTTTATAGTTCTAAGCTAATTGAGACCAA  
TCAGATAGATCCAGGTATAAAAAATGATTTCAATTTCTAATAGCTGGATTGT  
GAAAAATCCTCCAATTGTTGTGTATGGAACACCATGAATGGAAATATTTTC  
AGGACATCCTGAAGCTCTAAAGCTTAATATTTACACATGATTGCTTGTGG  
ACAATTTGACTACTTCCAAAAGAGGAAAGCCAAGACCTATTCAGAAGTAGA  
AGAAAAGCGCTCCAAACAAGGGATCACCTCAGTCGCTCTGAAGGTAACCTG  
GCCTTGTTTTTGATGGATTGCAATGAGTATCTGCCTTTTACGAAACAATA  
TGCAATTGTTATTAAGAAGCCAAATGGGTAAAGAAAAAGGGATTGTATAC  
CACTGGGAATTGGGAAAATCAATGAAAACAAAATCTTGAAAGTTGATTAC  
CAGCAGTTTTAGTATTTTACTGTTGCACTCAACTAGATTCAGTAATGAAC  
CTGGTGAATCTTGAGCTAGTGAAAAGACAGAGTACCTGAGCAGCCACCCT  
CCAGTATGTCAGAGAGCAGCAGGGACTGGGGTCCTTGGAATTTCCAGTGC  
CTTTTCCTAAGTTAGCTGTTTTTATTACTGACAGAGAGAAGAAGCAGAAA  
CACATCACTTTAAAGTAGTGTTTCTCAAACCTATTGCCAGACCCCTTTA  
TACTCTTAAAAACCAATGAGACCAAAGAGCTTTTTGTTTATTTGGGCAAT  
ATCTATTAATATTTATTATATTGGAATTACAAGTGAGAAAATTCAAAA  
AAATTAGTGTATTTACAATAGCAATGAGAGATATTTACATGTCAGACTAA  
GTAACATATTTTAATGAAAAATGACTCTATTTTGCTCCCCAAATACTAA  
AATGACATTGTTTTACATTTTGGAAATCTCTTTAATGTCAGGCTTAAAA  
GAAGACAGCTGAATTCTCATATGTGCTTCTGAATCATTCTGTGTCAAAAA  
TCTTTTTTTTTTTTTTAAAGATTTTATTTATTTGAGAGAGAGAGTGAGTGT  
GAGTGAGGGCAGGAGCAGAGGGAGAGGGACAGACTCCACACTGAGTGTAG  
AGCCTCACATGGGGCTCCATTTTCATGATCCTGAGATCATGACCTGAACAG  
AAACCAAGAGTTGGACGCTCAGCCAACTGAGCCACTCTAGCACCCCCGTT  
CTGTTCTACATTTTGCTTTGATGTTTGTTTTGCCTGAAATATAGGAAGA  
AAACCAGGCCATGTAAGTATGTGTATCTGGAAAGAGAGGAATTATTTAAT  
AACTTGTCAGATAATTCTGGATATTTTTTTCTTAAATACTATAACAAAA  
CTCTAGAAAAGGTAGTGTCAAAAGTTTAGTTGCAATGTAAAGTATGAGA  
TACTATCAATGAACTTTTTGTATCCTAAGATATAGATACATAACATTGA  
GTGGATCTTTTAGCCCTAGAGGAGTTTTTGACACTGTGCATTGATTATAT  
GGAGAATATTAGTTCTCTAAGTTATTGGTTAACTAAGTTATGTGGATCCT  
CTAAACATTGACACATTTTCATAATATTAAACAATCATATCTGTTACTGCC  
ATCACAAATCACATCAGAAAAGTTTGGAAATATTGGGACACTATCATACT  
CATAGTGATGGAAACAATTTTCCAGAATTCTAATTTTGCTGGAAAGCT  
TACATTTTATTGCTAATGACATATACTACCTGTTGTTTTTCTTGAAGTGA  
CAGGTTTATTTTACTGATTGATTGATCATAAGAAAAAATGTTTCAGAACT  
TAACATGAGATCTACACTCTTTTTTTTTTAATTTTTTATTTATTTATGATA  
GTCTCACACAGAGAGAGAGAGAGGCAGAGACACAGGCAGAGGGAGAAGCA  
GGCTCCATGCACCGGGAGCCCGATGTGGGATTGCATCCCGGGTCTCCAGG  
ATCGCGCCCTGGGCCAAAGGCAGGCGCCAAACCGCTGCGCCACCCAAGGA  
TCCCGAGATCTACACTCTTAACAGATTTTTTTAAAGTACAATTTAATATTG  
ATATCTATAGGCACAGTGTTGTGCAGCAGATTTCTAGAATTTATTCATCT  
TATATAACTGAAATTTTATAATGTTTTTTTAGCAACTCCCTATTTCTCCCA

TTCC TAGCCCCTGGCAACCACCATTCCTCTTCTTTGCTTCTATGATTTTGA  
CTATAGGGAAATCATGCAGTATTCATCCTTCTGTGACTGCTTTATTACTT  
AGCATAATGTTCTTAAGGTTTCATCCATGCTGTACATATTGCAGGATTTTC  
CCTTTTGCTTAATGGTGAGTAATATTCCATTGTATGTATATATTGTATGT  
ATACCACATTTTCTTTATTCACTCATCCAACAATTAGATTGTTTTTCACAT  
GTTGGCTATTGTGACTAGCACTGCAGTGAACATAGGATTGCTAATATTTTC  
TTTGAGATCTCGATTTTAATTCCTTTTGGGTAAATATCCAGAAATAAGATT  
GCTGAATCATATGGTGGCTTTATTTTTTAATTTTTTGAAAAACATCCATAT  
GGTTTTCCATAGTGGTTGCACCATTTGTGTTCCCAACAAAAGTGTACCAG  
CGTTCAGTTTCTCTACATCCTCACCAATATTTTCTTCTGTTTTTTATCTG  
TTTATTATTTTGATAACAGTCATCCTACAGGTGTGGGATGAAGTTAGACC  
ATTTTCTTACACCATACATAAAAATAAACTCAAAATGGATTGAGGACTTAA  
ACTTTAAAATTCTTAGAGGGAAACCTACAGGAAAATGTTTCATGACATTGG  
TCTTAGCAGTGATTTTCATAGATTTGACAATCAAAAAGCACAGGCAACAGAA  
GCAAAATAGACTAGTGGAACTATGTCAAACATAAAAAGCTTCTACATAGCA  
AAGGGAACGATCAATTTAGTGAAAAGGCAACTGGAATGGAACAAAATATT  
TGCAAACACTTATCTAATAAGTGGTTAGTTTCCAAAATATATAAGGAAC  
TTTTACAACCTAATAGCAACAAACAAAACAAAACCAAAATCAAGA  
AAGCAAAACAAAAAACCCCCAAAAACAGCAACAACAACATTACCTGGGT  
GACTCAGTCAGTTGGGCATCCAACCTCTGGTTTCAGCTCAGATCATGATT  
TCAGGGTCATAGGATCAAGCCCCACATCCAGCTCCATGGTCATGGGGAGT  
CTGCTTGGGATTCTCTTTCTATCTCCCTCTGTCCCTTCTTCCCTGCTCTC  
TCTCTCAAATAAATAAATGAATCTTTACAAAAAAAAAAAAAAAAAAAAA  
AAAGGAGCTAGAGACTTCAATAGACATCTCTTCAAAAAAGACATACACAT  
GACCAACACATATATGAAAAATGCACTATATCATGAACCACCAGGGAAA  
TACAAATCAAACCATGATATATTTCTGAAAAATTATCTGCCAAGTATCC  
AAATCTGAATAATTATATCTTTAGACTTTCTTTCAAGTAAAATTAATGTT  
TATAAAAATAATGACTAGTTGAGCTTATAGCTCAGAAAAATTATACAAGAG  
CATTCTTTTTCTCTGTAGACAGTAGAAGTGCTTCAGGCCTACTTCCCATT  
TCATCACACAAATGACTAAAAGTACATGTTTAAAAAATCTAGATTTAAT  
AAAATGAACAATTTTATTACATCATCATGATTTCTTAAATAAACTGGCT  
CACATACATACATGTATGTAAACATATAAACATAAATATATATGTTTTAT  
GAATCCATGGCAATGAAAAATGCAATGACAAGTATGGTTAATACCATTG  
TCTTGATAAAGAGTAAGGTGCTAGCATTGTTTTTGCATATCAAAACAAA  
GGTCAGCATAGGGGAAAAAGGCTAATCGTGTCTTATCACAAAAACAGTT  
TTGCTTTCTGAGACAATTTGAAATGGTTTTAGGGACCCCTAGGACATAGT  
GCATCTCAGCTTGAGTGTTGCTATTCTAATTCACAAAGCCATTTACAAA  
ATTGTATTATTTCTTCTTCACATCTGGTCATTTTATAAGGTGAGGTTGGA  
ATACGGACAGAGTTAAGGGTATTTTAGCACATAGTACATATTAGGAACTT  
AAAATATTTTGTGATAGGAGTAACTAGACATACCTAAAATGCGAGTCTC  
CTGACATCCTACTCTGTGTTCTTTTTCCCGAAGATTGAATTTTTAGATT  
AGAGCGGGTACAGAGAAAAAAAAGCACCTAATTAAGTAGAGGTGAAGG  
AGAAATATCTAAATCTCTAATCTTCACATGACACCAGAACTCTAAATCAA  
TCTCTATGTCATTGATTGTAATAGTTACCTTGACTAGTTTATTACAAAAC  
TTCTTGGGTTGGTTTGAATTCATTGCTTCAATCTATGTAGACCATGGTCC  
CTAAGATACCAATTTCTTTACTACTCTTGTCTCGCTTCCCACTTAACTCC  
CTGTGTGAACACGGGCAACTCTCCTGAGAGAAGAGCTCTTTAAGTGAAGA  
AGTGTCACCTCTTAAAGAAAGTGGAGGACCAGCAGAGATAGCAGATCAA  
GGGGGCAGACTTGAGTCAACCTGGCTTAGGAGAAATACTCTAAGAATCAT  
AGAGATGGTTTTCCCTATTCCAGGAGGTAGCTATTCACATGAACACAAAAC  
AATGCTTGCCAGTGGTTCCCTTCAGAGGGAAGGCCATGGACTATAAAATA  
AATTAACCTTCCACTTGCTGGTTCAGGCAAATCAGGACCATAGAAAATTCA  
GACTGCTATAGTGAATTAGCATATACTAGTTCTATGAACACATGGAAAAC  
TTAAGTTTCCAGGGAGGTACTTTTGGCACCTTCAGCGAAAGCCACATTAA  
CTCAGGGAAAAGCTGATAGTGACTAACAATTCCTACAAAAGGCTATTTTT  
AGAAGCAAACCTGGTGAAATCATAATGGTCAGTCAAGAGAAGGACTGGCC  
CAATGACCTAATTACCACTCAGTGGGGAAACTAAAACCAGCCCTGGAAAA  
TTGCGTCAATATTATGGCCTTTAATGGGCACCATTTTTTAAAAATACCCAT

GGCTATCCTAAAAATTTTCCCTTTCTTTATGAGTAACCACATACTGAGAG  
CCAGTTTTATTTTGAAAAAAAAAAAAAGAAAGAAAAAAAAAGGTTCTTCAAAT  
TTCATGACAATCCCCTAAAAGCTCTGTTCCCTAAAAGGTTAATTAGATAA  
TACTCAAATGAGTAATTGTGCTTCTCTCTCTGATACATCACTTGGGCTC  
AGATGCCTATGAACATCTCATTAATTAATTTAGTGCCAAATAGGTGAATA  
CTTTGATATGTTAAGATCAGGACTTTCTCAGAAATGTGTTTTTGTACATA  
GCTGCACCTACATGCATTAGTTATTGCCTATGCTCTTGATAGATGCCTTT  
ATTCTGTTTTATTTTGATGGGGGGGTAAATGCCTTTAAATTTCTTTTCTTT  
GCTGCAACAAACCTGCTACTGACAAAGAGTGAGGAATCAACCAAATGGAC  
ATGCCTCAATTTTAGTATGCATCTGTGGCCATAGTTCCAGAGCCTCGGTG  
TGTAAGTCATCTAATTAAGGGAGACGTAAATCTGGAAAGCACATGAATTG  
GCAATGAAAACCTAATTAATCCATTTATTTCATTCAATCAACAGCTATATAG  
TAAATGCCTACTACCTGGTACATATTGCAAGGATACACAATGAATAAAAC  
GGAGAAGGCTTCAGCTCTCCCAGAGTCCAGGGACTGGAGTCATTCAATAA  
ATTCTTGTTAATTTGATTTTACCAATTCAGTGTTTTCCAGATATGAAGTA  
TTTGTTTAAAAAATACAGGTAACAGAGCCAATGCTTTAAGAAAGCTTTAA  
TTACAAGGATAATAGCCTAAATTTGATCATTTAGCCTACAGCTGAATTGT  
TGGTGATAAATCAATCATTCAACTGAAATGTTAACTTTGAATCTTCAAAC  
GAATTTTCCTGGCTTCTCTTCATCTTGTCGCCAAAGCCCCCTTACCGAGGT  
CCAGCTTTTCATCAAGACCTGAGCCTTTATTTCACATTGAGAAAGTACAGTG  
TTTTTGCCTCCCTCTCTCCCATGGCTGATTAGAACACATTGGAGCTTCTC  
AGACATCCTTACACTCCCTTCCACCTGTTTGTTTTAACTGGGTCTTACA  
GCTGTTCCCCCATGCTTCCCTTTCAATTCTACACCATCATTCTGATATAC  
TTCTCTTTCACTGACTATCTCGCTCTCCACAGGCCCCAGAATCCCTTTT  
GTTCTGAAGATACGTTTGTCTGGGTATAAAGGCAATGTGCACAGTTTCAGA  
GCATATAGTTTGAAGTATAAAGATTCTTTTCAGAGTTTTTATCAAAGTCCT  
TATTGTTGTGGTCTGTTTGCACAAGCCATCATGGCCTTCTAATTCCTCAG  
CTATCTGCCTGCAATTGCAACAAACTTTTTTGTGGGCCTTTTTAAATTCT  
AGAGGCCCTACCTAAAGGTTCCGTGTAGAGTCCTATCTTTTTATTAGTGGC  
ACTTCTGGAAAGTTAGTGATGAAGCAGACAATTTTTATGAATTCAGTACC  
TCTAGAACCAGCTTTTTTCATATTGAATATCCAAATGTGAAAAATGTTTTA  
ATTTTACCCTAGTTGTTTTATTCCTTTTTGTCCCATTGATAGATCAAACA  
TGGCAGGTTTTGCCTAGCTATCCTTTGTGATGAAGATGAAGAGAAGGTGC  
TATTTAAATCCTATTTTTCCCTCCTGAAGTAGGTTACACAAATCCTTATG  
ATGGTGGATCAGAGTTTATTGGAGCTTGGGCCCAACTACATACGTCCTT  
TATAGAAAGTTGAAAACCTTTTTGTTGTTTCATCAAAGCCCTGGATAATTAT  
AATGTTTCATGTTGCCTTTTGGTGACATTTGCCAGGGGCTGAGGCAGTCCT  
AAAGATATCTCTATGCCAGTCAACTAAAATGATGTGATCTGAAACACTTT  
CCTCCTCATATAATATTTGTTACAGTATTTGTTCCCTTTTTGCTCCAGATA  
AGAATTTAGTACAGTAATAAAGATCTTCACCCTCTTCACATTAGATATCA  
CTAGATTTTCAGCCTCAACTTTCTGAAATATATTATTTTAATTCCTTTTA  
AGGGTCAAAACACATGTACCAGGAACAAATCTGGTGCCAGATTTGTTTGA  
AGGCCAACGAGACTGAATCCTTACTCCTTAGATAACACGCTCTAGTAGAG  
GTCAACAATAAACATGCAATCAAATGATGATTAAGGTAATTTTCAGATGAT  
GGTCATTTTTTTAGGAGAAAAATGAAACCAGGCAATGGAGTTGAGAGTGAG  
TGGTAGGGAATATAGGTATGGGTAGGTGAAGACTTCAGCCAGAAGGACAA  
GATGAGACAGCTTCTCTGAGGGGGTGACATTTGAGCTGAGCAAGAATCGA  
TGATAAGTGGGGGCCAGATGTGAAAAATAGGAGGAAGGAGAATTCTAGGG  
AGAAAGATGGCAATTGCTAAGTGTTGAAACTAGAAGGGGAGGGGCAAGAAA  
AATAAAGTGGCTGAACAGCGGTGAAAGAAGTGAAAGCTTTTGGGAGAGG  
AGGTGGGAAGAGGGCATAGGTTTTCTAGACAACGCAAAGATGTGGAG  
TGTTTTAGTAATTACAATGGGCAACTATTGATCCCCGAAGCACACATGAA  
ATCCCATGCAATTTCTCTCTATGCAGTCCTCAGTGTTTGACTCATAAACT  
GTCTTCTCTTGGTAACTGAGTATCAGAAGTAGCTCCAGCTCCACAATATA  
TCTGTTGGCTATGAGTCATGCTGTTTCTCCTTAGTTCTCCGTGTCTAGTT  
TGGGTTCCCTGGCAGCTACTGGGCAAGTCTAGCAATGTCGGGCTACAACCC  
TATGTTTCACTTAAAAAAAAAATAATGATTTTAGTTATCTACTAATGAGAG  
ATAGAGGGAGAGAAAGAGAGAGACAGAGAGAGAGAGAGAGGCAGAGGGAGAA

GCAGGCTCCATGCAGGGAGCCTGACATGGGACTCGATCCTGGGTCTCCAG  
GATCACGCCCTGGGCTGAAGGCAGGCGCTAGACCGCTGAGCCACCCAGG  
CTGCACCCCCCTTTTTCAAAAGATTTTATTTATTTATTAATGAGAGATAC  
AGAGAGAGAGAGAGAGTATGTTTCACTTTTAATTTTACCTAAACCAACAT  
TGAATAACTGAACTTCTAGCAAACCTGAGAACTAGCTTATTACATAGCA  
GGTCTTAGGGGCTTGCCTTTTTTGTCTCATTTTCGCAGTATACAAACA  
CAGTTCGGTGAAGATTTCTCATTTAAGAAATTTGAGGATAAACTTTTGTG  
ATATCCTGTTGCTGCAAAGTTGGTGGAATGTTTTCCCTCAGGGAAAGTGT  
GAGAAGGAGAGTTTCCTTATATCTTTTGGTAATGAAGAGATTATATTCTAT  
CTTTGAATATCAGCGGTGCATAGCTTTGGTGAAAAGCTACTTTCTTGACT  
GTAATTGATATTATACTTCCTGCCTAGGACTCCTCAAAACAGGAAACCAT  
GAGATAGACTCCTAGCTAGGTTACCTGTTTACCTTAATCATCAAACGTT  
TACTGAGCACCAGATTCTAGATAGAACACTGCTGGGCAATGGACCAGAAA  
TACAATCACATTCTGTGATAGCATTTAATTCCCTAAAATGTAGTTGAG  
ATGTCAAGAACACAAGGAGAGCATGAGGTAATCTTCCCTCTGGCCTTCAAT  
TCACTTAACTCTTGAAGGGCAGGTGCAAATGAACAAAAGCATCTTCTACAT  
TTTTGTCTATAGTGCTCTGCTAAGTACCATTTCCCTGTAAGACATCTCTC  
AGAATCTATTTATCTGTTTTGTCTGTTTTGGTTTCATATAAATTCTGCC  
TCTTTACTTTTAAAGGATTAAAAGGCAGCAGCCCTTGGGTATCAAGAGAT  
CTACTGTCAAACACCAGCATTTTGAATTTGCAACTCATGATTCTTGCTAAA  
TATGAAGAGACCTTCAAGCCTTTAAAAATGTGTTGAGCCTACCTCAAGGA  
GGTTACTATATACTAGGTACAGGTACCTACTATGTACCTGTCTCATCTA  
GTATTTGCTCTCTCAAATTTGATACTAATATCCCAAAGTTAAAAGAAAGT  
CACTGCCATCTATGCTTACCTCTATAACTTTGGAAAGATAGTACCCATAA  
GCCTTCTTATGTGCAATTATAACCTCCAAATTTAAAACTTTGAGAAAAA  
CAAACAAAATAATTTCCATTTTGTATTATGTTAAACCAGTTGTTCTCAA  
GTGCAAGTGAATTTACTCCCTAGGGGATATTTTGCAACTAGAGACATTTT  
TGGTTGTCACAGCTTGAAGAGTTGTTGGTGGGGGGGAGGCGGTGTTG  
GGGATACTACTTGCACCTAGTGGGTAGAACTAGAGTGGCTGCTAAACTT  
TTACAATGCACATGACAGTCTTCTGCAACAAAGAATTATCCAGTCAGAAT  
GTTACTACTGCCCAAGGTGAGAATCTTAAAGTGAGACTCATTCTTGGGAA  
ACTCTCAACCAATTTGCTTTTTATTTATCAATAGTCACAAGTCTTTAGTG  
TAGAATATATACTTGTCAATTTGCTGAAATAGTGAAATTTTGCTAAATGAT  
TTGTTAAGTATTTGTAAAGATTTTAGATATGGTACTTAAGTCATTCCATG  
ATATAGCTGGTTGCATTTCCAGTGCTATAATTTTGTTATGCAATAAAAAAT  
CATGGTGTTTTATTCCAAGACTGCTAAAAGTCCTTTGCCAAGTTAATGAAG  
AAGGCTAGTCTGAATATGTTTGGAAGGTTTAAAGATGCGTTCTAATTAGA  
ACTAAGTTGTGTGTAAACACACAATCATAAGCACACATCTATATCCAAGT  
GCCATGTTTCCATCAATAATTTGCATTGAAAGGTATTTACAGCCTATATG  
TTTGATGGCGGAGGAACCAGATCAATTATTGAGATCTATAGGGTGAATCA  
CAAAGCTATATAATAGCTATATAATTGAACTTAAGTTCAAATATTTTCCT  
TGTTTTATTTTCCATATGAAAGCCACTAAACAACAACAACAACAACA  
ACAAAGCTTTTATAAATTTGGTTTATCATAAGCTCATTGTAAATTGTCAT  
CATGAGAGAAAAGAGGAAGAGAAGAGTCATCAACTCGAAACATATTTTCCC  
AGGCTTTGCTAATTGGATTCTTTTCCACTGCTTGTTTTCAGTAAATAAAT  
CAATTTTGGAATAAACTATCAAGAAGGATTTAAATATCAAATGTTTATT  
ATATGAATGAGTTTGAGGGTTGGCTTTTGAGAAGGGTTGGTTTACTTTA  
AATGGTATCATTTTCACTTTTACATGTCATCTTACAATAACCAAAAAGACCA  
AAAGAACTCTGACAAGGGTGCAAACCTTCTTGAGAAATCACCAGAATTCCA  
CAGATGATATTGGTGATTTTACCTTAGCACAACATGATTGCATCCTATG  
AACAAACTCTATAGCCAGGACTATGGTTAAGCTACCAGAAAGAGATCATA  
ATGATACAGATATGGTGGCATTCAGACTTGGTATTTATAAGCCAGTTTC  
CCTGAGGCAGCTTCCAACCCCTATGTGGATTTATTTTCCCAGTGATTAT  
CTCTCCTTCCTTCAATGTATTCTTTGTGCTTGCTGGACTGGTTTGAAGTG  
TGAAGGTGAATGCACTGGGTGTGTATGTGGGAAGAAGTCCACACCACTAC  
CTAGAGGCTGTTAATCATTCTCATTTGTTATTTTAACATTGAGAATATACT  
TTATCTCTGGGACCAGAACCCGCACACATGAATCAGGTAACCACTGTTTC  
AAGATTGGACTGCACAACATTATATTTTATGTAATCAGTTAGCCTTTTTTC

ATGTCGTATGAGGGTATAAGATCGCTCTTTGAATTCTGTGCGGTCAGTTT  
CTATACATAGATTACATAACAAGCCTTTAACAAATTGGTTACCTGATTAA  
ATTCACCCTTTGTTATAAGATGCACATTTATTGCCAGCAGAAAAGTGGTT  
TGCTCTTTTGGCCTCAATAATGCCAAAGGGAATAACAAATAATCCTGCTA  
TTAATGTTGTTATAGGTTTTTTTTTTTTTCTCTTTTATTTCCGTATCTTTT  
ATCCAAAGACATATATATGTGTTTTTGGCAAAATATCTGAAATCAGTCTA  
TCCCTTTGATACCAAAGTTATTTTCAGCATAGACAACGTTATGTCCCTGT  
TTTACCAACTGCTCATGAGTGAGGTGGAGAAGTGGACATGATTGCCAACT  
GTCAGTACTTGGTCACATATGCTTTGTACATATGATATATCCATATTCT  
TTTAGAGTAAATTTACTTTTTATTTTCAATCTGTTTCTGGGAGAAGAGATA  
CTTTCTTATCTCTTAGGTCCAAATACCTTAACTACTGTTTTCTTTGATCT  
TTCTCAATACTGACTGCTTCCTTAACTTCATATACCATCAAGCCCCTAG  
TAGGAAAAAAAAACGTAACACTGAATATTTGTATCCTAGTCCAAGGGGAG  
GTTGGGAGACCCTGGATAAAATAAGTGAGCTGGAGAAGTGGCTTACTGAT  
AAATGGTGGCTTCTTGGCTAAATTTATTTTACTAGAATTATTAGATGTTTT  
ACTTTAGAAATACAGAGTTATGTTTCTAAAGCCATTGAAAATGTATAGAT  
ATGGATAAAATCTGGACAAATTATAATCTATTTTCATACCATAAAAATGTA  
AATAGAAATACCTGATATGATATCACAAACCCAGAAAATAGGTCTTTATC  
CCATTTCTCAATGCCATTGGCTAGATTCATTTCAGAGACAAGACAATTACG  
CTGATATGCCAAACCTGCTGGCAAGCACCTGCAGACAATACATTAGTACT  
GGTCAAAGTTAAATATTTGTAAACAAAAATTTGAAAAATTTACAGAAGA  
GTGCTAAACAGTGTTTTTAGATTTTCTGAAAACCTTACCACTCCTGGTA  
AGGAAAACCTTGGTGTGTATGACAAAAAGGAAAATACTGGAGACAACCTCAC  
CCTGTGCCACTGTGTCTGTGTGTTTGGGGTGCTTTTAGCACCTCCTTCTA  
AGATATATGTATCTTGAATTTAACCACAGCTGAGTTTATTAACAAAATAG  
TTTAGGGATCCCTGGGTGGCGCAGCGGTTTAGCGCCTGCCTTTGGCCCAG  
GGCGCGATCCTGGAGACCCGGGATCGAATCCCACATCGGGCTTCCGGTGC  
ATGGAGCCTGCTTCTCCCTCTGCCTGTGTCTCTGCCTCTCTCTCTCTC  
TCTCTGTGTGACTATCATAAAAAATAAAAAAATAAAAAAATACTGTTT  
GCAAAATAGTTTAGTGGAGCCCTTGCATGTTTCTTTTCTCCTTGCTGTTG  
TTTGAGGAAAGACACTCTCAGATATATGAAGGTAAGGAGTATCTGACAAA  
ATGTACCAAATGCTACTGACTTAGATCCAGAGTCTTTCAATAGGGATAGA  
GTTTCGTGGAGGTGTCGTTGTAAGTGTGGTAGGGCCTTCAAGGGGGCATT  
TGTTGTCTATGGAGAGTCATTGATGAACTATCCAGTGCTGTTTCGGATACA  
CGATTTATAGGTGGAAGCATGTCATTCTAATGGTATCACTGAGGAATGGA  
AAGAGATGAAAGAATGAGCCAGCTGCTCTTTATTGGGAGAAGATGGTGTG  
ATAGGCCCTTCAGAAGAGTGATCAGACCTCAGGAAATTTTCTGCCTCCTG  
GGTGGGATCTGGATATGGTTTGGAAGTTTCACCTTCCATACTGCACTTTC  
AAATATTACCTATTAAAGTGCATCAAGTTGGGCAGCCAGATGGCTCAGC  
GGTTTAGCGCTGCCTTCAGCCCAGGGCCTGATCCTGGAGACCTGGGATCC  
TGTAACGCATTGGGCTCCCTGCATGGAACCTGCTTTTCCCTCTGCCTGTG  
TCTCTGCCTCTTTCTCTCTCTCTCTCTCTCTGTGTGTGTGTCTCTTAT  
GGATAAATAAATAAAAAATCTTAAAAAATTAATAAAAGTGCATCAAGTTAT  
TTGCTGTCTACCTTAGAATGGAGGGAGAATTTTGAGAAAAAAAAAAGTGC  
AGGTAGAAAGATTGGTAACAGTGATGCACTCATGCATAACAGAAATGACC  
AACCAGCTTGTTTGGTACCTCACAAGCATATACAATCAGAAATGTGAAC  
ACTACACTTGCTGTTAGCTGTATTTCCCAAGTCCTTTATAGGACAGAGGCC  
GCAAGACCAGTTTTTACCATCTACTTAATAACATTATTTGCATTAGTTTG  
GCAAAGCAACTTCAGACATAGAATTTAAGAATGCATTTTCTGGACCATA  
AAATTATAATTGTTTTGCTAGTAAAAGTATAAAATAAATGTCTGTTCAA  
GCTAATTACTGCCCAACTTGTGATTTTTTTTTTTTTTTGGTTGTTGTTGTT  
AGCTTGTAATAAACCCAGATTCGCTTATTGTAGTGGGATATTAAATAGTC  
CCTATATAATATTATAAATCCTGCAAAGAATTAGACATCTGCACTTTTTT  
TTCTAGCAATGTGCACTTTAACTCAAATGTCTGTAGTTAGTGACCAAAA  
GTAAATGCATTGAGAAAATGAAAGTCATCCAGTTCCACACTAGTTTTACT  
TTGGGATTTAAGTAATATTTAGGATGTAGATTTCCAGGTGACAAAAGTAT  
AAGGGTCTTGGGAGATGAAAGAACATATTCCTGGGCTAGAAACCCATT  
CTGGAAGGGCTGGAGCAGTAGGGTTCACCGCCAGGGTGATGGGAGCATGG

CACCAGTCCATTAGAGCAACGCTTTGCTGACTTCCTCCTGGTGTTCACTT  
TAATCAGATGAGGCTGTCATGACCTTGGAGGGTGAGTGGTTGATCCCACT  
GTGCCCAGGACTTCCCAGGTTTAACTAAAGGCCATGTGACTCAGCAG  
CTCCTCAAACCTGGGTACACCAGGACATGGTGCCCTCCAACCATGGGGAA  
AACAGCCAGTTTCCCAGGAAGCAAAATGCCTTACAAGAGCATCTGCCTTT  
CTTCCTCAGAGTCTCTCTATGCAGCCAAGATAAGCAGAATGCATTCTCTCA  
TTTTCAGGATTCTAGAATTTCTTTGTTACCTGGACTTAGTTATTTTCAGTG  
TAGCATACCCAGAGAGAGTTTCTTTGCCTCTCAAATATTCCTTCCTTGG  
TCCTAAAGACAATCTATTCATCTCAGGTCATGTGACCGTTTTGACGTGCG  
CATCTGAAGCATCTCCCTAAGTCACTTTCTGTGTTAAGCTTAAGTGGGG  
CAAGGTTATGTGTTATCTTCTCATCCTACTGACAAAGGGTACTTTTGTAT  
TCAGTGATGACTTGGATGTTCTCACACCTTTCAGAGCCTCTCTTTGCTTT  
GATACAGCAATATCCATGGGAGCGGGAGGAACTGGCAAAGATAATCTGC  
AGGATAATAATTTTTTATTTTCAGGTGGAGCACACAGTTTTTTATTATGTAAG  
TGTGTTACATTTGCTTAGAACAAAATCTCCCATCAGGAGCCCGGACAACC  
CCCAATCCTAAGTATTTTACCTAGAAGGGGAGATTTGGAGAGGTTACCAG  
AGGCAAAGTGCAACGTGCCGTTCTTAAGTCAGCTCACTGTTGAGGTATCC  
ATGCAATCTGGGGTTACAGCATGATCCACCGTGTACCAATTATGCCATTC  
ATATGCTTCATTTACTATATACACACATCAGAACTAGAGTTTATCTCAAG  
GGCAAAACCCAAATCAGGCCACCAAAGCCACAAATCACGTAAGCCAAACA  
CCCACAGAGTACAGTGCGGCATCCACTGTGTGCCCATGGATATATAGTTG  
TACATCGAAAGCTAAAGCAAGGGCACAGGTTGAAGATAAGGGAAGACCCC  
AGACTGTCATCATCCAGGGTACAATATCTGACAGATACAGTTAGAAACCA  
GAGATGCAGCCTCAGCCATTCAGGTTTTTTTTTGCCAAAACCTTGAAAGATA  
CCGGTATTATGTCTCACAATGTCATCTTTGAGTTACGGGTCTTCTTGAT  
GAACTGTTTTACTCTGGTCGTTTGATCAGAGCACCAGTGTCCTTGACTGG  
CCTGCCTTACTCATTTACTGATAAGCTATCGGGTCTTTCATTTGTGTTGT  
TTCAAATGACTGAAGACAGAATAAAGTTATATTCCTCACACATACCAAAC  
CTGCAAGAAGAGGAAAGAATTGGGGTAAAGTGGGGTTCAAATATCAGTT  
AGATGAGACAGGATATATTTGGTCACAGAGATCCCCAGCACTTAAATCA  
AATCCCCAAGTCATTGCCTAATCCATACACTGTCACATCCTGAAGGAGAA  
GATGCTCCATCTGAGGAAGCTATTGAAGTGCTTCAAAGAGTGTCCTCTT  
AACTAGAGTCCCATACCCTTTATTTTCTGAGTGAAGGGGATTTCGCATAGG  
GTATTGACTGCAATTGTTTTTATACAATGCCAATAATGTCGCAGGGACAA  
ATTCAGTTCTATAAAAGGAAGGTGAAATTGAGACAGGACCTGGGGAAGAT  
GCCAATCTTAATAGAATGATTTGATCTTTTATAAGCGAGAACACTGCATT  
CAATAGCAAAATTACCTGGATTAAAAAATATATTTTGTTCAAAAATTCAA  
AAAGTTGTACATAAACGAATTGGTACTAGTATCACTAAAAATGTAATAAAT  
TCTATACTATATACTATTTCTTAGTACCATTTAATTCAGTACATCATTC  
AAATTGGCTAGGAGAAATTTGTGTGTATATATGTGTGCATGTGTGTTTTC  
CCAACAGCTACCACGCTTACCTGTTTCTCAAATCAATCCTTATGCATATA  
CTAGAGCAATATAATATGTGTGTGATCAATAAATGACACCCAAAAGATTA  
GAATAATGAGAATCAGGTGCCTCTTTATAATAAAGCTGTACCTTGTTATA  
GGTTTTAGAAGATTGTGCCACAAAATTTTGTGTCTGTTAGCTGGAATTTA  
TTGAGTGCTTGCTGTGTGAGAGGCATTGTGCTACTTCACATAAATGTTCT  
TAATCTGTTCTTTAAAAAACTACTTTAGGGCAGCCCAGGTGGCTCAGCG  
GTTTAGCGCTGCCTTCCGCCCAGGGTGTAATCCTGGAGACCCAGGATCGA  
GTCCCACAACGGGCTCCCTGCATGGAGCCTGCTTCTCCCTCTGCCTGTGT  
CTCTGCGCCTCTATGTCTCTCATGAATAAATAAATAAAACCTTTAAAAAT  
AAATAAATAAATAAATAAATAAATAAATAAATAAATAAATAAATAAATAA  
GATACATCAGTATCCTCTTTTAAAAATAAATAAATAAATAAATAAATAA  
ATGACATTTTCTCAAGTTATTATTATTTATTGTATAAATATTCAATGA  
TTAAAGGGGCATCTATATTTCTAATGGAGTGTCTGAGTTAAAAAATAAG  
ATGAGTTTTTTATTTATTTTATTTTATTTTATTTTATTTTATTTTATTTT  
CAATTTGCCAACATATAGCATAACCCAGTGCTCATCCAAGATGCAGTT  
TTTAATCTACATATAAAACAGTCATATGAAAAGTATTTTCATCCAGAAA  
ATTAGGACTCTCAGCATTAATAATTAATAATTTTGAAGGTTTAGTAACCA  
AACAGGGATAAAAAATAAATGCAGTTTTTTATTTATTTTATTTATTTAT

TATTTTTTTTATTGGATTTCAATTTGCCAGCATATAGCATAACACCCAGTG  
CTCATCCAAGATGCAGTTTTTAAATCTATATATAAAAACAGTCATATGAAAA  
CTGATTTTCATCCAGAAAATTAGGACACTCTGCATTAAAATTTAAATTTA  
AAAAAGTTTTAGTAACCAAACAGGGATAAAAAATAAAATGCAGTTTTTAT  
TTATTTTTATTTATTTTTTATTTTTTTTATTGGAGTTCAATTTGCCAGCAT  
ATAGCATAACACCCAGTGCTCATCCAAGATGCAGTTTTTAAATCTATACAT  
AAAACAGTCATATGAAAACCTGATTTTCATCCAGAAAATTAGGACTCTCTG  
CGTTAAAATTTAAATTTAAAAAAGGTTTTAGTAACCAAACAGGGATAAAAT  
CCTTTAACATTATTTTTATGAGCGAGACAAAGCATGCCCCTTTTAAGTGAA  
ATAACAGATTTCTAAATTACTCTTCCGGTTGACTCAAGAGTACAAAGGCC  
AGCTTTTGACTATTGAGGAATGGAGGTCCATTTAATGTACATGTCTAATT  
GCAAAATGTCTAATTGCCAACACAAAAATGCATACGCATAGTAGGCACTT  
TATTAGGCAGTGAGGCTAATCAGTTGATAATCGTGTCTAAAATTTCTTTC  
AACTGAATTTTAAACCACTTGAATCAGGCGGTTGCATAGAACAGATCAAC  
TCTCCAACCTTTACCTATGCCTCTGGCGGATAGCTGAGAACACAAGAGGAA  
GAGAGCTATCGCGCCCTCTAGGGGTACCATGTAGAAAAACCTCCCACAGC  
ACAACTCCAGACAAGTCAGACTGCTCCTTCCTAGCCCAGCAGGAAGGGCT  
AAGTGGGGATACCTGAGCTTGAGAGAAGCAGCAGAGTCCTGCCTCTAGTG  
TGTGCCCCCACTGGCTCATTCCTGGAAGTGGTCCATCAGATCTTATGGGC  
ATCCTAATTATTTTTATTATTGAAAGGGGAAGTTTACAGCATGCTGTCCA  
TTTCAATTGCACAGTTCTTTGATTAGCCTTCACATTCCAAAATAACTGTT  
AGTGGATAAATTTCTGCCTTGAGTGCAGGATCCCTACAGTGGCCTCCCC  
CGGTCTGCTTCTGAAGCAGCCTCTCAAATAACATCATGTGTTCTCCTTA  
TGAAGAGCTTGACTCGCTGAGAATCAGGCTATCTTTGGAAGATAAACAAG  
TTCTTAGGGAGAGATAGGGGATAGGAGAACTCCTGATGGCAGCGACATC  
AATTCCAAAACAGGTCCTAATTGCTGAAAATAAAGCAGAGCCAGGTCCTG  
AGAATAAAGGGATACATGAGGGAGTTAACATTTACTACACAGGGTGCCTG  
GCAGGCTGTAGACCAAGCAAATTATATGTAGTTGCTTATTTAGTTACTCA  
CTATCGCCCTACCCGATAGTTTCGTGTAATCCTTATTTCTCAAGGAATGTG  
AAAGCGATTTTTGAAAAGATAACATGTTTCAGGGTCACACAGTCAGAAATT  
GTCAGAGAAAAGTTAGGTCTTCAGTCTCCCATTTCTTAGGCTCTTTCCAA  
TTACCATAACTTCTGGTCTTCTGTACGTACAACTTAATTTGTTATATTTG  
GGGAGAACAGAATGATGTAAAAGAGAAGAGAGCTCATGATAAAGTTGATA  
GCACCGTCTAATAAAAGCTGTGAAAAGTGAAATATAGAAGGGAGTAAGA  
GCTGTCTGCGTATCGGGGTAGGAGGAGGTTTTCAAGAGATGAGAGAATTGC  
AATGACGATTAAAGACCTTTAGAGAAACCAGGGAGGGATAGAGAGGAAGT  
TGGAAGATTTTCAGGGAAAAGAGGAAGTGAACCAGCATGAGCTAATGGACA  
TGTGAGCATTTTCCATGTAATATTGTGAACTACTTCATCAGGCTGCTGTT  
TTACCCCTGGGCTGTAAGGTAATTTGAAATCTGATTGGAGAGGAAAGATC  
AGATGAGCAAAAGCAGTAGCAAGAAAGACTTTTGAACCTAAGTAATACTG  
AAAGAAAAGCAGCTTAGACAAGGCACAGTAGTTATGAACCTTGGCTAAAT  
CAAGTCATGAGGATTCTGGGAAATGGAAGAACTGGGTGTTAAAAGAAAG  
AGTAGCTGAAGCACAAAAATATTATTGAGTGAACCTTAGCCAAGTTTGGC  
CCATTCTCAATTTTACTTAAGAGTATGTTTTCTTGGGGACGCCAGGATG  
GCTCAGTCGGTTGAGTGTCTGACTCTTGATTTTGGCTCAGGTCATGGTCT  
CAGGGTCCTGGGATCGAGCCCTGCCTCCAGCTCCATGCTCAACCAGAATC  
TGCTTCTCTGCCTCTCCTTTTGCCTTTCTCCTCACTCATGCTCTCTCTCT  
CTTTCTCTAATATAAAATCAATAAATCTTAAAAAAGTATGTTTTT  
CTTGAAAGCCTAAGTTACATTTAACCTCACATAATTTTACCTCCCT  
GGAATGATGACACAAGTATAAATTAGGGAAAGAACATCTTACAAGGTGTT  
GGGCGCGTAGTGTGTATGACAAACTCAGGGAGAGGAGGCCGACCTC  
AGACTAACCATGCATGTTAATAGAAGGTATACATTGGTCTTGTTTCAGTTA  
TGTCATGGCCAAGCCACACACATGTATGGTTTAAAGGAACTTTGGAAGT  
AGCTTGAAGTTACCCACCTCCAACCTGGAAAAAATTTAAAGCTCACTTGT  
ACATTCTTGCCAAATTTTAGCTGTCCTTCATGCATGCATGTAAAACCAAT  
ATTGTCAGTTGCTGGAGGGAAAGTGCATATGATAGGCTTGAGGAAAAAAA  
AAAGTCTAAATATGGAGCATAATATACAGCAATAAAATGCATTAAACAGT  
TTCATCCCTAGAAATGGTGGGAAAACAGTCTTGGGTAAATATCTGTGTAA

GTAGATGGGCAAACACCGTAACTCCAGATAAACGCTTGTCCCATAGGAAG  
AAGAAAAATGTCCTTTTCAAGCACAGGACATAAAAGGAAATATAAAGACT  
GGGTTTATTTAATTATTTTTGAAGCTTTTTAATTATTTTGAGGATAGTGA  
CACAATAAACTTTGACCTTGGATTTTAATGTCTAAATATCTGAGAGTTTC  
TATAATGAAATTCCTCTCTCCATTATTA AAAACTTAGTTTTTTTTTTTCA  
TTACTGGTTTTGGAGCCTTGGATGCCTTCAGATAATATTCCGAATTCTCC  
TCTTTGTATTGTCCATAACGACATTGCCTAGCAGAAAAATCAAGTTTCAG  
GCTTGATGCATGTTTAAGAATTCACTTTCAACATCTTGATGTGAGCCAGA  
GGTCTGCCTAAACAGCAACAAAGATGAATGCAGAAGGAAATTTAGGCTGA  
CAAATACCAGTCCCACCTGTGTTGGTTAATAAGCAAGACTCCAGCCCAGC  
CAGTAATCCTCTGGTAACTGTCATTTCCATGTATCCAATCAGTTGCCTGG  
GAATTATCCCAATAAAAAAGAATACAGTGTGTCAATTTATCAGGCAGCCAAT  
TAAAGGGCCTCTATAGCCCTAAGATCACTGGAAGCCAGTTCTCACAAAGG  
AAGCAGGATGGGGCCAACTCAGTATGGCCTTGGGGCAATTCAGAAAGTA  
AGTTGTGGCTGATTATAGAGGGACCAGATTTACAAAATATTAGAAGGAG  
TTGGTTGTAGTTCAATATGTCTCCTTGACAAGAATTTTTGGAGGACACCA  
GGGCATGGAATGACGGACAGCAATGGACTTGGCTGATCTTACTAAAATGG  
GACTCTGCCTTTGTGTGGCTATGAGATAGTTTTTAGAACATTTCCCTTGA  
CCTCTGAGGCCTAGTTAGCTACAAGTCTTAAATATGTGAAATAAAAACAA  
ACAAATGAACGAAAGTTAAGTGAGGACAAAAACCTCATGAGTATCTTTGA  
CTCCTTAACTGAAGTCAGAGAGATGAACAAGAGTTGATGGGGACCTTCTC  
TTCTCATTTTTTTGGAAAATGGAAACAATTCATGTCTCCTCAAAATACTTCTA  
AAACACAGGTTTTTACCCCCATGGTCACCTTGATGAATGAAAGTTCTCTG  
TAACAATGTTTTTAACCCGAAGATAGTGAAACACTCTCTAGTCCTGCTTC  
AACCAGTTGGCTAATCTGCAACATCGAGTCAGTACTTAGACATGCCAGAA  
AGAAACATGGAAATGTATTTTCATGGATTCTAGGATGTACCTGTTTTTCT  
TTTCTTTATTTTTCTTTTTTAACATTTTAATATCTCTGAATTTGGGACAA  
GTCTATATAGACTTGTGCACTAAATTACCTGATTATAAAACATTGTGCGA  
TATATTAATTATTGGCATTTAACATTTTTTTTAGTCCAAAGTAAATTAGTG  
GTATGTCTTGTAACCAATGACATCTGAAATTGGATGGGATATAGGAATGG  
ATTTTAAGTAAATTGAGTGAAAGGATTCCATCTGACCTGTTTAAGATATA  
TCCCCAATAGGTGAATATAAGTAATTAATACATTAGGGCTGGAGTTTCAC  
AGTGGAAGAGCCAGAGACTAATTAGGGAATCAGAATAAAGTGCTTATAAT  
CTTGGAAGGGTTTTTTGAATGGTTCAAAAATATATACGCATCTGGAAGAT  
CTGTGTCTTGGTTTTTCATAAGAGATACCTCAAAAGCCAGATTATGTAGGA  
ATCAACCTGAAGTTAGTTGTTTAGTGGGTCCAGTCATTCATTTTCTGATT  
ATCTTGTTTAAGCCACTCTTGGTATTGAGATAACTTTAGCTAAAAGCACT  
TGAGGTTTCATCTAATCCATTGCTCGGTATCGATCGCCTGTGAATTATCTC  
AACAGCTAAATGCTTGGGGAGGCACTTGATGGTTTGAATATTCAAAAACA  
ACTTCCCTGGCAGAAAAGATTATACTTATTATAACAATAGAGAATAGTCA  
AGTAAATGAACATTTATTTTGGTAGATATTATAAGATTATACCCTTAATT  
ATGTCCTGCTAGTGTTC AATTGAAATCACCAGGTATTAGCTAATTAGTGT  
GTGCACGGGAATTTATTAGATACAAGCTGGGCTTCCGAGTTCAGTCTTCC  
AAGTGCAGCGTGTGCCAGCTGTGTGATCTTGGACCCCTACGTCCTTTCTC  
TGAGATCCAGCTTCTGTTTCTTTAAAATGGAGATAGTAACACTTAGCTGC  
ATCAGGCTTGGCTTCAGACAAGATTCTATTGCGAAGTGCTTAGAAAAGGG  
CCGAGTACACAAATACAGCTCAATAAACGGCAGCTATAATAATACTTTTT  
ATTACAGTGAGCGCTCTACCTATAGGACAGCACTAACAAGTCTAATTCAG  
TTAAAGAAGTGGTTTCCCATTTCTTCTGCCAGAACAAATTAAGCCTGA  
GCCTTCTAACTCTGTCTGAGACAGTGTCTAACGTGACTTGGCAAACCAC  
AGATGGGTTCCAATTTTATTAGCTGTACAGGAAATTTCTGATTGATTTAA  
CCTCCAAAAGACAATAGCGTGAATTAACATGTAACAAATGTCAACTCTT  
GTTATTGCTGGAACCGACGAGCCCTCCAGATCTCTGTCTCCTCGGCTTTT  
CTATGCATCAATGCGGGTTTTTTTTTTTTTTTCTCTTTCTTTCTTTCT  
TTTCATTTTCCCATAGCGCCTCGTTGCACCCAGCTCACTTTGAGTGATGT  
TGGAACAATTTTCAGTTGCAGTTCTTCTGAAAGTCAGTTATTTTGAAAC  
ATAAAGAGACATAAAGAGATAAACACCACCTACCTGCTCTGTTTTGGGTG  
GCACAGAGCCAGAAGTGATGCAACTGGTGTGAAGCTTTTATCAATAGGGTT

TTTTTTTTTTTTTGGATGATTCTTTATATTTGCATATCTTAGTAATTAAG  
GGATTTTTCCCCCACCTCCAGAAGCAATTTGTCCAAATCCTTGAAAGACA  
GCATGACGGGGGAGACACACACACACACACACACACACACACACACAC  
ACACAAAACCCCTTTCTTCTTTAAAATTATGATATGATGGGGATTAAGAG  
TATAATAGCAAAATATACTGTGCTTATTGTTGAGAGTCCCAGTCGTTAGT  
TCTTGAATCTACCAACAAGACCTTGGGCCTATCTCCTTTCTCTCAAAGC  
TTCAAATTAATGTTCTTCAAAAAGATTTCCAGAGGTCCTTTAGTTTTTAT  
ATTTTATAACTCCATATCATATTGAGAAATACGCATCACTGAACGGCAAT  
GCAAAATTTTCAGCAAGGTTATGAATGGGGTGAAGTCAAACCTAACTGGGTC  
ATGTAGTACCTCATCCCATGTACTAGAGAAGTATATGCTTCTTTTGATC  
GGTGGTATGTAGGAGATGTTTTCAAGCTTTTGCATTAATAGAAATACTGG  
CTAGTAAGCACCTCGTAAGTAAGTGGCTGGAGTTACGGCTGGAAAGAATT  
TCCTCTCTCATAAGCAGGCTTGATTGTTTTTATCAGCACGAAACAGAGAC  
CTTGGGGGGCATATTAACACTGAATTCCAGTTGACTGACCCAAATATTGA  
GTGACGATGACAAATATAACAAAAAGGAAACGGAAAACTGCTTCTTTTTA  
ATTGTGATTGTTCCGTGATTTTTAGTCTGTTTTTCACTCTACTGTTACCCA  
AACTCACTGCCCTCACCTCCACTAAGCACACACCCACCCACCCACAGAG  
CACAGACCTCGCCTTCCCTTTTGTGTTTAGTGATGAATTTTCATTCAAT  
TTTTCATGATACAGATATTTATTGAGGGCTCGGCAAACTTTTCAGCAAAG  
AACTGGAAGAGATACATTAAGGCAAAGAAGAAGAGCGCTGTTCTCAAAGA  
GCTTACACTTAAAAAGGAAAGATAGGCAACACATAAAATAGGGTATAAAGA  
AGAGAGATTACACAGTGATATGAAAACACATATATTCATATAAAGACAGG  
AAATCAAAGAAGGGGAAATTATGTGAGTGGTTTCAGACAAGACTTCCTGG  
AGAAGGTGGCATTTCAGGGGCTCCTGCAGGATAGGAGATTTGGGGCATG  
AAAAAGTAGGGTGGAGGAAGGAAGCCATCAGGATAGACCTAGATGCAAAA  
TCTATGACATCATGAACCAAGAACCTTCATTATGGCTGGAGCCAAGGATT  
TTCACAAGAACGTGGTGGGGGCTAAGACTGGAGGGATGTGTGATAGTCAG  
ACCATGGAGGACGTGCACGGTGGGATGGAGAGCTGGGAATGTACCTGGTA  
GGCTCTGGGGGATTAGAAACATGTCAAGTGGACTCCGTAGGTATCTACTT  
GGCTCACTGCATCTTGCCTGCACATCTCAGGTCAAATGCTTCTTTCCTGA  
GACCATCTCTGGCTACTTGGATTAAAGCAGGTGCTTACACTCCTCGGTTA  
CCCTGATTATATATTATATTCCTCTGTTTTGTCTTTTTAATGAAACAAAT  
TACAGTCTAGGACTGCCTTGCTTATGTGTCAATGTATTTATTGTCTGCCA  
ACACCTTCTGGAATATGGAACCTCCAAGAGCAGAGTTACCTCATCATCCTT  
GGTCACTGCTGTTACCCAAGACTTGGCATGTTGTGGGTGCTCCTCAAATA  
ATGTCCCAATGGGTGATCGAATGAACCTGAACGTGCCTGGTAAATTCTCA  
GTTTTACAGATATCCTCAGCCTATAGACACATAGGTTTTTCTTTTTCTTT  
TTTTTCTCTGCAGTATCTGGTGAAGGGAATAAAAGTGTTTTTAATAATAA  
AAGTCAGCTTCTGCCAACCTGAATTAGCGGCATCCCCAACTACTGTAAGG  
ATCTCCTTATTTACAGCGATGCCTCTTCCAGATGTTGTTGGTGCATGTTT  
TCTCTTTCCAAGTACAACCTCAAACCTTCTCATGTGTTCCAAAACCACATGG  
AAGTGGAACGTAAATCTGGGGGTGGGCATGTCTGTGTAATTTCTTCAT  
TTCTATAAGGTTTTTGGTGGCTTTTTTTTTTTCTCCCCTAGGCCACAGATT  
AGCTTAACAATTGCAAATCAGCTTCAGAGGTTTTTCCCTTAAAGAAAAAGG  
GAAAAAAAAAAAAAAAAAGATAGCATGTTTGAACAGGCGAGGCTTGGTGAA  
AGTCTCTTTGTTTTACATCCTAGACTGTTCACTCAGCTTCTAGCTACCTT  
TTTTTCTCTGGATCAGTAGAAATTAATATATGTGTGTGTGTGTGTATATA  
TATATATATATATATATATATATATATATATAGTTGCTCACCTCTTTT  
TTCAAATTGTACAGGAACCAGAGAGTACGCTCTCTCTTCTTTATACTCCT  
GACCAATATTGGCCTCTGTGCATGTACGCATGTGTGCGCGCACTTTAATA  
CAAAATCCCCAAAGGAGGGTGAAAAAGAAGTGCAGTATAAATAAGCAAACA  
ACCAATTGACTTAACAAATCCTTATTTAGCTGGCCTCTGGTTTTATTTTT  
GAGAACCCTTTCTTGTTTTTGATTTGAAATGATGCCACCAAACATATT  
ACAGAAACACTGCGCTTTGCAAAACAGAACAAGTCAAATGAGCCTCCCCA  
AGTGTAACAGAAATCTTGTTTGGATGAACTGTTTTTAAGAATCCAAATT  
AAACCAAATGGCGTCCTTTTTAAAGTGCATGTGTTTCCCTTAAGTGCTAAA  
ACTATATTATGTTTCTGCAATTCTTTTTTATCCCAAATGTTCCAGTTAGG  
CTGTGGTTTTTGGAGACGTCTTGACTATAAATGGTTTTTCATGCATTCGGCA

AACACGATTCTAGAGTCACCAGAGATCGCAGCCAGCATCTGTGTGTTGTA  
CGTGCTTCAGTGTCCCCGGGGAACCAAGGTTGGTAACACGCAGCTTGGCA  
GAAACCAGTTGGGTGCCGCTGTGTGAGGAAAGATGGGCAAGTTCCTAGCA  
TCTGTTTGCCTGTAATTAATCAAGTCTGTGTTTTCTACCCTGAGTACA  
CTTGACTTAAGTGCCTGCATCATGCCTTCTGTACACGTTGTGACTTTTC  
ACTTCTTTGTAACTATTGCTAGTGTGATGGCAACACATTTCAAGGTTGGGT  
TCACTGGGCTAAGCATTACTTTCTCATTCACTCCTGAGACAGTACATTAG  
GAGTAATGAGTCCAGGCAGGAATATTTTGAAAAGAAAAAAAAAAAAAAAAA  
AAAAAGCCCAATTTGTCTTTTCTGGATTGATCCAAAATGGAGATTGGGT  
GTTCTCTTCCGCATGTTACCGAATCAGATTGTGTCTTGAGAGTCAGAGAA  
ACAGGAAATTAATCTTTTACAAAAGACCATTCTATCAAGGGATCTCCGCT  
TGTTTATTTTCATGCTTGGAAAGTATGTTCACTTGCCAACCAGACATGATA  
GTGACCCTCAAAAATGAAGTGGTGAGTTAGAAAATGTCACTTTTCTTCCTG  
TCCTTCCTACCTTCCACTTCCCACACCCCCCACACATACAACAAGCACAG  
AGTCCAGAGCAGAATTTTCTTGAGCAGAGCTTGAAATGTGGAGACCTACA  
GAGGTGGTCAATGGGATTTACATGGCTTCTCGCTGAGATAAACTTCGTTT  
CAGCTAATCTTGTCTCCCACCATCTGAAGCTAGTTGAATGTGGAACAGAA  
AGGTCAGGATAGTGAGAAACACAATTTCTGGCTGCCTTGTAGGCACTTTC  
TAATGACTTAGTTGGTCTCCTTGATTTGTCTTTGGGAGATGTAATGAGAT  
GAAAAGTGAGATAAGACAAGACTAACAGGTAAGTAAATATAGTTACTTTA  
ACAAATTTAAGAAGATACACGTCCCCAAGGGTGTCTCACCTTCAACTCA  
GTTCTTTGAAAGTTTATATAATTACTCATAAGCATATTGGATGTCCTTT  
TTTTCCCCCTTCTTTTTCAGAAATATTTTTTAGAGCCTGAAGCACATTCT  
TAAATGTTTAAATATTTGAGGGCAGATTTGACTTTGGCCACAGTCAATCA  
TTCTCCATGGTGTGAGCCAGGGAATCCCATTTGGATCACAGAACTATAGT  
CGCCAACTATAAATGGGACCAATACTTCTACATATATAATAAAATATTTT  
TAAATCCAAGAGGATTGTGAATGTAGACATGAGAATATCTACATTTTTT  
TGCCTTTTTTTTTTTCAATTGGCATCACTCACATAAAACAGGGCTTCTC  
TACATGATTCAATTTGGTAGCAGACCATGCATCAGCTGGGTACATATCAGC  
TCAAGGCAGCTATGCGAAGATTCAGTTGTTTCTTGGGGTGGAAATCACCC  
ATTGTAGTATCGTGTCTTGGTATTCCTAAAAAATGCCTATGGGGATAATG  
ATAGATATGAAGAAAGGGAAGTAGAACACAAGAATATAAGAGAAAATGGA  
GAGAAAGAAAGAAGACAGAGTTTTGATAATATGATGCTGGAAAGGGGTGG  
TTAAAGGACCAGCAACAACCCCTTTGGGTATTGCTCAATAGAATCACTCCC  
AAGCAGCCCTTGGCGATTTGGGGAATGGTTTGTGTGATGATTAATTTTTT  
GAATTAACCTTGACTGAGCCGTGGGGGGCCCAGGTATTTGGTAAAATATCA  
TTCTGGGTGTTTCTGTGAGAGTGTTTTTGGATGGGTGTAACTTTAGATT  
GATAGACCAAGGAAAGCAAAATGCCTGCCGTCTCCGCCCGCCCCCTCAC  
CCTGCCCCAATGTGGATGGGCCTCATCCCATCAGTTGAAGGCTTGAACAG  
AACAAAAAAGGCTGACCTTCCCCTAAATAAGAGGGAACCTCTTCTTCCCTG  
ACCATCTTTAGACTGGGACATCAGTTTTCTTGCCTTCAGACTCAAGCTG  
AGACATCTCTTCTTCTTGGGTTTTGAGTCTACCGGTCTTCAGACTGGAAC  
ACATGCTATTCTGCTTCTTAGGCATTCTTACTTGACTAGAGCTAAACCT  
ATCAGCTTTCTTGGGGCCTCCACTTGCAGACTGCAGGTCTTGGGACATGT  
CAGCTTCCCTAATCATGTGAGCCAATTCTCTCATAATAAACTCTCTTCTT  
CTCTCTTTGTCTCTCCACCTGTCTGTCTTTCACAGATACAGAGATAGAG  
ATAGAATATAGATCTCTTGGCTCTGTTTCCCGAAGACCTCTGACTAAT  
GCAGTTTGGCTACTCATAATGACCTTGTAGTCTGGAGTTTGTCTGACCTT  
GCCCTTCATAAATCTGCATCACCATATTAATGAATCTTGACAGATGAGGT  
ACTCTAATCTCAGTCAAAAGGAGCTGTGGGGGAAGCAGGGGCAAAGACTA  
GGACTGGCAACAGCTCATTGTGGCTGCACGTCTGTGCCTGAGGCTCCCGG  
GATTAGCACAAATCAGCAGGTGGCTGGAGAAGGGCATCTGAACCGGAAGAT  
TCCTCTCCTTCTCACCTCACCCCTGCACCTCTATTCTGTTGGGGAGC  
ATTACACATTTTTTAACTCTAACTGTGGAAGCGAATGCAGCTGCTCTTTG  
TAATTGTTTGTGAACTGAGTTAAAGGGAGGTTGTTGTGGCACTGCAGGT  
GCAATCATTAGACGCATCTATGCTGTGTAATTAACCTCATTTCATGTGA  
ATGTCCGTGGTTTACGCGCCGCTTAGAGAACTCACGCCATGATCATTACA  
CTTACAGTCAATCCAATTAGACAAAGGTTCCCACACTTAGAGAAGGATCA

GGACAAACCACAAGGGTAGGCCTCTCTCAAGAAGGTCTCTAGTTAAATGT  
CTCAAAATAAACAACACTGTGGCCTAATTAATTGTACGGCAGGCCAAAGGAA  
CACACCAAGGAGCTACTTATGTGTCTGGATCCCAATCCTAGGGAGCTGCT  
TAATAGAATCTCCCTTTGTCCACGCTTTCTGGGGCTTAGAGATGTGTGCA  
AATGGGGGAAGGAGGGGCTGGTGGCTACCCTCCACCCTCTGTCTTATCACC  
AACCCCGGTTGCCCAATAAGATATCCAATGGCTTTATTTTGATTTACTTT  
ATCCCTTTTATGTTCTCAGCACAATTAAGGAAAAAAAAAATTCATGGGTA  
CTTCTCAAAGAAAGTTGGTCAGGCTGGCAAGGTTTTCCACAATATTTTAT  
CAGAGCTACAGCTAGAGGGGTGCCACCAAAGGATATTTTCCCTGGATGTCC  
CAGATTTATTGACTTGCTTTTCTTCTAAAGCTCTCTAGTGCCACAGATCT  
GACGCCTTATTTTAAACATTTGTTATAATGGATGTGCTATACACGTCCAT  
CCTTTGGTCAGTTTGTAGTTTCGTTCTTTGGACATATCTTAGGTTTCTGTT  
ATCTCCTCAGAGATGCTTAGCACCATGCTAGTAACTTTAGGGGAGCCCAG  
TAAATGCCTGCAGGGTATCTGATTCAATGAAAAGAATCACAGTGTATCAA  
ATAATCGCAGGAATCTACACAGGGTCTTTATATCACAGAACACATCCATG  
ACTGCTTGAAGCCCCAAAAAGGCAGACTAAAAATAAAGGAAGTTAGGAAT  
GAGAGGAAAGAAAAAAAAAATATATATATATATTTATTTATTTATTTAT  
TTATTTATTTATTTATTTATTTATTTATTTATTTATATAATGAACTATAG  
TCCCTGGAAGAATCAAAGTTCACGAGACTTTTGAATTAAGCTATAGATGG  
AATCTAGCTCCTGAAAGTGTAATGTGTGGACCAGCAGCAGCAGCAGCAGC  
AGCATCACCTGGACTTGGTTAGAAGTTCAGAATCTCAGGCTCCATCCCAA  
ACCTGCTGAGTGAAATCAACATTTTACAAAGGCCCCAGCTGCCTCTTAT  
GCACATTCCAGACTGAGAAGCACTTGGCCTTGGAGCTGTAGGGTGTGTT  
AGTTCAAGGCTGAATGGCTCCCAGGAGAGCTACAGGACTGTCCATGGTTC  
CCCACAGTTCCTGTTAATTGTCTCTTCTTTTCTTTTCTTTTAGGATTT  
AAAAAAAAAATATTTGAAAGCGAGAGAGAGATTGAACAGGAGTGGGGTGA  
GGGATGGAGGATGAAGTAGTCCCGATGCGGGACTCAGTCTCAGGATTCTG  
GGATCATGACCTGAGCTGGAGGCAGACATCCAACCACCTGAGCCACCCAA  
GCACCCCTAATCGTTTCTTCCCTTATCCCCATCTTCTGCAGCTTTGTTTCT  
TATCTTTTTTTAAAAAAATCTGAGATCATATTTTAGAGTAATAGATTTG  
GCATCTCCTCCTCTCCATTACTTTCCTGTGTCTGTACCTTCTTAGTAGTA  
CTTCTGAGTCCCACATGGAGGTCACATCTAAGAAGCATCTCCCAAGCATT  
CCAGGCTGGTTTGCTGCAGATTGTGTTTCTTTTGCACTTATAGTACTTAT  
CAGATACTCTAAGTACTTATTTACTTATTTAAATGTCTGCCTTCCTCATT  
AGACTTAGAAACACAGCAATGAGCATGGCATCTGGCATAGAAGTAATTGT  
TTGAAACATGGAAGAAGGAGGAAAGCCCTTTGATTTGCAGTCTGGGGTGC  
TGTACATGTCACACGCAAACTCATGTTTTTGAGTATTTTGATTGGCTCTG  
ACATATTCTTTTATTCTTTTCATGGATTCAAATGCTGACGGCAGGAAAAAA  
ATAGATACATAGTCTCTGTCTCAAGAAATTAATACTGACAGACTTGGG  
TGCCAAAATAATTATTTTTTTAGAGTTTTGGCAGTATTTCTCGAAGCTAGC  
TGACTATATATTGAGATTATTTGGAGAGCTTTTTTAAAAATCCTGACTCT  
GGGGGTACCTGGGAACAATTCAAATGGACTCTTGTATCAGTGAGGCCCA  
CATGCAGGCATTTTTACATGCTCTCCAGGTGATTCCCAAAGTGCAGCCGT  
GGTGGAAGTCACTAATTGAAAAGATTAGTGGGAGTTAAACTATTATAAT  
TAAAAATAAGCTTGGATGGTGGTTTCTGATATGCTCATTTACAGATTTTCC  
ATGGGGCCACAGCTGTGTCCCGGAGTCTGTGGGCTTCACGGGTGGCCTTG  
GGAGGGCGCTGAGATGGCTCTGGACCCTCACCCCGCCTTAATTTGAGC  
CGTGTCACTTTAACTGGCTTTACAGATCCAACCTTCTGTGAAAGATTTCTT  
CAAATAAAGGATCTTGCTGCTGTGCAACAAACAAAAAAGCTTCTAAA  
GCACTCGTTTTAGTGACTGGTTAAAGGTGATAGAACATAAATAATTTATCA  
TTTCCTTTTCTGTTTGTTTTCTTTGTGTCAGTCTTTTGATTGAGGGATGTTT  
TTTAAAGAACAACCTGCTATCCTATCACTCAGGTTTACTCGACTCTTAAGA  
GTTTATGGAAAGTTTAAATGACCCTTTCTCAATCAATAGTTTCAGGGAAA  
AGAATGTGAAGAATTAATTGAGTTGATGCCAGACCAACAAAATGGCTCAG  
CGTAAACCCTGATGATTAAAAATTAAGTAAAAATAGCACAAAGTGTTTCAT  
AAGCCATTTTTATTTTTATTTTTATGTCAACAATAATTATTAAGCCTCCAT  
TATGTCTATAAAATACTAAGTTAGCTTTAAGCAGTTTATAGCCCTATATG  
TAATGTTTTGTAAGTGAATTTACATATATAACATATATATAAAGTTACA

TATATATAAATTACACATATATAACATATATTATATATATTACATATATA  
AATTACACATATATTACATATATATTATATATAACATATATATGTAAATTAT  
ATATATAAATTACATATATAACATATATATATATATCATGTATGTGCACA  
ATCTAGGCACAACCTGGCAAGAAATGAGACTCTATTCTACTGAGAGGAGCT  
ATTTCCAAGAATTATGCTGATAGTCTATGCTGTTTTAAAGATACTTTTTT  
AAAGAGTATTTTTGATATATCTGAAGCAAATATGGCAAAAAGGTTAACAT  
TAACAAATCCTGGCGGTCTAGTAAAATGTGATTGTTGCATGATATTCTAGA  
TGGTAAAATAGTAAGATAGGTAAAAGTAAACAAAATGAGAGGAAACCAA  
GAAGAAGAATCAAGGAAGACTTATTATCAGTACACTATTTTTTTTTTAAA  
AAGTTAGAATTGTACCAGCCATGTTTATCCATCTAATATGATGACTGTCA  
GTTTCTGGCCGATTCAAAGTCTGTAACCCGCCACTGAACCTCCCCAGTTG  
TTCTGTCTGTGGGAAGACTTTTTCTGTAGGACAAGCCAAGGCAAGCCTAGA  
ATGATTCCCTGTAGAAGAGTTTTAAGAGTGACTGTAATTTAGGAAAGTCCAA  
ACTCCCAACCAGACACCATAGAATATACCCTTAGGAACAAGAGACATGGT  
GCGTGTTGGATATTCTTTGTGTCTCCATCCCTATTAACCTTGTCAGCCTAC  
TCCTTCCTAGTTTATGCCCCAGAAAGCAGTCCTGATGATGAACTTCAACA  
ACTGGAACCCCTTTGTCTCTGGAAAAATACATTAAGTCAGAAAGTCAAG  
TATCCTATTAAATCTGATCATGCTTGTGAGGGGAATGTTCCCTATCAAG  
CCTCAAAGATATTCTGCAGCAATACCTGTAATGTGGGACATAAGCCCAGG  
AGAGTGTGAGGTCCAATTAATGAAAGTACTAATTACATTCATAAAATAGT  
TGGTATGGGGAGAAAAAAATGTAAAGATAGCTATAATTTGGTTTCTTTC  
CATTGGCCTACGAAGACCTAACCTGGGAAAATAACACCTAGGCATCAGGT  
CTCAGTTGGTCCTAAAATCTCTTTCCTGATCCACAATTGCTAATTCACTT  
AAGTAAAAACAATATTTGGTCTCACAGGTGCCAACCCCTGTAAGCCATTGC  
TTCGCTTGGAGTGGCTGAAAAAATACAATTACATTACATTCATGAACATA  
CCTCCTTCTTGAAAGAATGCAATTAACATTTGGAAAAATATTTGCTGCTG  
GGTAATCTCAGTCTCTTGGGTCTAGAAAAAATATGAATAACAAGCCATAC  
ATTTTTAAGGCACAGAACTGTACATAAAGACCTGGTCTTGATACAAAAA  
CTAAAAATAATAAGCAATAATTCTAACTTTTACCTTATGTAAGTGAATA  
TCCTAACACCTCCTGTTGGAATCAGCTGTGAATATACTGTTTTTGCTTGA  
CAACTCCATCCAAAGAAATATCCACTCTTTTAGGGAATAATACTTCTTCA  
AACAAATACCGTTCCCAACAGATGCTCTTATGGTGGAAATATTGCATCCC  
TTTTAGCAAATGTCACTAAAAATCTGAATTTTATAAGTTATATCAGTTTA  
TATGATAATTTGATCTGAAGTAAGACTGAGCAATAACATTAGTAGTAGTT  
CCTATGTAATAGAGCCATTTTGGAATTGGCATTTCATGGAGAGGAAGCCAA  
TATTTTAAAATAAGAATGTTTAAATGAGTTTACTGGCTCTATTTTTTAGAC  
TAATATAATTATGTCTGCATTAAACTCTGCATCTCTCATTATGAAATAA  
ATCACATATACATTATGCATACTGAAAATCTTTAAAGCAGTTAATTGGG  
GGAAGACAGACACTTTTTTGGAGAAGTGGCGTATGAACACATTTTTCTTTT  
TCTAACACAGCTATGCTTCTCACTGCTGACTAATCTATGTCCAGGTTT  
GTCTAGTCCATGCATATATTTGTATTAATAGATAAAAAAATATATTGGTT  
AAAAACAAGCAAACTAAAGTCAACTTCATGAGTAGTAGTAGGAAACTG  
ATGAATTTCTAATTCCTTGTAATTACTTTATTACGTTAGCCAGAGAATGA  
GAGCCAGGCTTCCCTAGCAAACTCAAGTTCTGAATCAAGTCAGAATAATT  
TATTATACTAATCACTCTATCTGAAGTATATCTCATCCTTGGCAAATCTG  
ACTTGAGTGTTCAAAGCGTGTGGGCCAATTTTTTAGCGAAGTTATACTTA  
GAGCACTATTTAAATAAGGCTCTGTGTAGATGGAGAACAGAAACGAGAAC  
AGAAAACCTTCATCATTTTTTCATTCTGCATTGCAGACCAGGCACATTATCTT  
TCTTCACATGATCATGGATATGTGTGAATGTTTACATATGACCATTGGAC  
TGAGAGTAGGTCTAGATGAAAAATTTAAAAAATAATCCATAATCAAACAAT  
AACCAGGTGAGAGGATTTACTTTGATATTAAGTCCATGAAGATCGGGCCA  
GGAGCCTTATACTTATCTTCTCAAAATCTCTAAGAAAGACTTGAGCAGAA  
ATTTTAAGGACTTGAATAAAAAAAACATGCTTCAATAATTTTTTCAAAT  
TGACTTTTGATGAAGGATTTTGAGTCAATCATTTTACTTGTAGTACTT  
CATGATTGTATACACCGTCTTCAGAGCATTTAGTGCCAGGGCAAGATGCT  
TATGATATAATTCTAATAATGGACTATTTTAACAGAGTGTGGATTCTAAT  
CTGATATTTTTGAAACACTGATAGCTGGAAGGTGGAGAATTTGCTATTTG  
AATGTTACCAGAAGGATCAGATTCTTTTGGGGAGAAAAGACTCATCTTTG

TAAGGTAAAAAAGGGAAACATACTTAGGTGACACTTCCTAGTAAACAGAC  
ATATTTGTGAACCTTTTATTGTGAAAGTAGACTATGCCTCTCTAATTCCTA  
GGAAGCATCATTAAAGAATACCTCAGTATTGTTTACAAGAACCATCAATGT  
AGCCAATTACCTTAATCTTGAATGATCTTCATCAACATATTATGAATTCA  
TTCATTTAACACTTTTAAACATATTTGTTGCAGAAAACCTGGACTAGGATC  
TAAGGAAGCAAAATGAAAAAACATTGTTTCTCATGTAAGGACTTCACAA  
TCCAGCATTATCAGAAGCATATAAGGAAATTATTACACTGTAGGCTTAAT  
GCAGTTGGATCAATTGTTATTAAAAAAGGTGGTAACACACAAGA  
CAGGATTATTGACTCTTCCCAGAAAGGGGAACCCAGGAAAGTCTTCCCAG  
AGAGCTGTCACAGTTGATTTCAAATATACAGTGTAGCACCTTGCACATAG  
TACAAGGGGTATTGAGTATTTGTTGAATTGATTTTTTTCCCAGAATAATA  
TAAAAATGTATAAATTGTATGTTATAACCAAGTCCATATGGAAGATTTTCC  
TGGCTCAATATTTTAAAAATGTATTTTGGGTTCAATAACTTTGCAAATAA  
TTCCTGGGGTCTTCTCAGCATATGATTTTAAATAAGGAGAGAGTCAGAT  
TTTATTGTTAGAAATGTATTGGCTTTAGAGTAACACGACTGACAGACTGT  
TATAAATCCATCCAAAGGACATGAGATTATCTTGTCAATGAGGTGCCCTC  
TGTTGATTAATCCTAAATCCCAGACCTGGGACATTATATGTTCTCATTTT  
AGGGGTCATCCTGATAAGCTGATTTTTCTGCACATGAGGTTTACAGCAGG  
GCTATTATGGCCACAAGAAAGAGCAACAGCTGAACCTCATCATAACCTT  
GTGTTTTGTGTGTCGATCTTTGCTTTAGGGACAATCACATTTATTTGCTT  
GGTGAGCTTTTACCTGCAAGGTTAACAAGGTGAGTGTGTGTCAAAAGCAG  
TTATTTTCATTTGAGATTTATTTCCCTATGGGTAGCCTTAAGATATTCAA  
GTTACTAATGAGGGCATTGAAGTTAGGGTTTAAGCATATTATGAGGAGAA  
ACATAACTGCCTGGAGAATAGCCATGATATATACTTTAGCCACGTCAGAT  
CCCTTTTAGGAAGACAGGAGGCCAAGTGTATGTGTGTGTGTGTGTGTGT  
GTGTGTGGTGAGGGGAGAGTGAAGGCAGAGAACATACGCATGTATATGTA  
TCTGTGAACATAAACCCAAAGAGCTATACCTCATTTTCTGATCTGTTGAC  
TTTTCCCCAAGATAGAGTGTCTGTTGGTTTTACCTTGTCTGCCACTAA  
CCTTAATGTGTCTAAAATTATAAAATAGGGATCCCTGGGTGGCGCAGCGG  
TTTAGCGCCTGCCTTTGGCCAGGGCGTGATCCTGGAGACCCAGGATCGA  
ATCCCACATCGGGCTCCCAGTGCATGGAGCCTGCTTCTCCCTCTGCCTAT  
GTCTCTGCCTCTCTCTCTCACTGTGTGCCTATCATAAAATAAATAAAATA  
AAAAATAATTTAAAAAATAAATAAATAAATAAATAAATAAATAAATAA  
TATAAATAATCCTATTTTATTCTATCTGCTGGATTTGATCTAAATAGGT  
CTGTCTACCACACTGGACTATATAATACCCAGAGCCAAACATGTAACCTT  
GTAATATTTATATCTCTTATTCTAGGCCTTTGCACTCATTCATTGTCCTT  
CGGAATCTTGACTTGCATATTGTCAACAGTCAGGCTTTAAACATTGTAAG  
AAGTTCTTCTCAAACCTTATGTACACATGGGTTTCCGGCAAATCTTGGTA  
ACAGGCACATTTTGAAGTCAAGTCTAGGGTAGGGCTTGTCTTACTA  
GCTCTCAGGGTCATGTTGATGTTGCTCATCTCTAGATCATATTTTGAGAA  
ACAGAGGTATCTGGTATACCTTCTTCTGGTTCTGCATTGAGCTCAAATCC  
ATTTCTATCTACTATGAAAATGAGTCAAAGTTGCACCTGGGGGGCTCAGT  
TGGTTAAGCATCGGTCCCTCCACTCAGGTCATGATTTTCAAGGTCTTGGGAT  
TGAGCCCCACATTGGACTCCCTGCTCAGAGGGGAGTCTGGTTCTGCCTCT  
CCCTCAGCCACTCCCCCGCTTGTGCTTTCTCTTTCTCATAAAACTAAA  
ATCTTAAAAAAGAAAAGAAAAGAAAAGAAAAGAAAAGAAAAGAAAAG  
AAAGGAAAAGAAAAGAAAAGAAAAGGAAAAGGAAAAGAAAAGAAAAG  
AAAGAAAAGAAAAGAAAAGAAAAGAAAAGAAAAGAAAAGAAAAGAAA  
AAAGAAAAGAAAAGAAAAGAAAAGAAAAGAAAAGAAAAGAAAAGAAA  
AGAAAAGGAAAAGGAAAAGAAAAGAAAAGAAAAGAAAAGAAAAGAAA  
GAAAAGAAAAGAAAAGAAAAGAAAAGAAAAGAAAAGAAAAGAAAAG  
AAAAGAAAAGAAAAGAAAAGAAAAGAAAAGAAAAGAAAAGAAAAGGT  
AGTCATTCCCGAAAGGGAATATAATTGTTTGGGATCATGTTTGGTTTTAC  
TAATTTTGGATGTTAGCGTTATACCAGTATAATATACATATGGATATTAG  
GATTGTTCCCTTCAAATAATTACCAACCACTTTTCCAGTGTGCAAACCTC  
TGATTTTGGAAATTGTCCATAGAACTCAAGGATGGGGAGTCACACATTCA  
TTCATATGATTCAAGGGAGTCACACATTCATTTCATATGATTCAACAAATA  
TGTAATAAGTGCCTAAAAAATCCAAAATACTGTACTACATTCTTAGGGAA

ACACGGATGAATAAGGGAAAGCTGTTGCCCTTAAGTACTCAAGGAGGTCA  
AAGAGGAGATAAGTAGTAAGCAAACAATAATGTTTCAACATAATAAATAA  
AAATGTGTATGTGTTGAGTGTATTTGCTTTCTTAAACCAAATAAAAGTCA  
TTTGGAGTTAAAATTGGTATCAAATCTTATAATGCACTTTCTAATTGAAA  
ATAAGTTGTGGCTATCAATAGCGAAACTTCTTCTTGACTGTCCTATAACT  
TGATTCAGCGTGCATTTAGAATTGGGTACGAATTACATTTTTTGGGAATAT  
GCAGACAATAACTTCTTTGAAGAAATCTGTTCATAGGTAGTAGCATCATG  
ACTGTGGAAGAATTACCTCCATTACTGTTTTTAAAAAGATTTTATTTATT  
TATTCATGAGAGACACACAGAGAGAGGCAGAGACATAGGCAGAGGGAGAA  
ATAGGTTCCCCACAGGGAGCATGATGTGGGACTCGATCCCAGGACCCAG  
GATCATGACCTGAGCCAAAGGCAGATGCTCAACCACTGAGCCACCCAGGT  
GCCCCTTCTTCTTCTTCTTTTTTTTTTCTTTTTTAAATATTTTCTTTCTTT  
CTTTCTTTCTTTCTTTCTTTCTTTCTTTCTTTCTTTCTTTCTTTCTTTCT  
TCTTTCTTTCTTTCTTTCTTTCTTTCTTTCTTTCTTTCTTTCTTTCTTTCT  
TCTCTCTCTCTCTCTCTCTCTCTCTCTCTCTCTCTCTCTTTCTTTCTTTCT  
TTTCTTTTCTTTCTTTCTTTTTCATCTTAAAAAGAGATTGCTCACACACCA  
GTGAGGGAGAGGGAGAGGGAAAAGATTTGAAACAGACTCTGTGCTGAGCA  
CCAGCCAGACTCAGGGCTCGAGCTCACAACCCTGAGAACATGACCTGAGC  
CGAAACCAAGCAGTGGATACACAACCAACTGACCCACTCAGACACCCTTA  
ACTCCATTACTTCTTCTTTAAATGTATTTATCTCATAACTATGGATTTG  
GATGTTTGTGCATCTGTATACATAATGTCCAATACCAAATTTAATA  
ATATTTAATAGTTCACTTGATGTGTTATCGGTTTGACAAATAAAAACT  
ATACTGTATGAATTCCTAACCACATCTCATATGTGGCTTAAAGGGGGG  
TGACCATATAATTTAGTATCCAACTGAGACCCTTGAGAGTAAAAGGCTG  
CACTATTAATATTTACACCAGGATAATAGGTAAATGGGAACATAATCATT  
TTTTAACTTTTAAAAAATATTTACTTATTTTTTTTCATGAGAGACACAGA  
GGGAGAGGCAGAGACATAGGCAGAGGGAGAATCAGGCTCCCTGTGGGGAG  
CCCGTTGTGGGACTTGAACCCAGGATCCTGGGATCATGCCCTGAGCCAAA  
GGCAGATAAATGTTTAAACCACTGAGCCACCCAGGTGTCAAATGGGAAGT  
AATCTGGGGCAACCAGGACATCAGATCATCTAACAGAGAGACTAGAAAAT  
ACTGAATAAAAACATCTCTGCTCTGGTCTGTTAGTCTTTTAGGATTAGCT  
TATTAAAACATTGTAATTTTTTCGGAGTCAATTGTGTTGAAAATTTTTGA  
TCTACATTCAGGAAGTGATGCTAATAAAGGAATTCGGATCTCACTGCC  
AGCATCGGTTTTTAGGAATGAATTTTGTACAAAAGTGGGGGTTTTAGGGC  
TTTCTGTAGACAAAACCTGCTGTTTGGGAAACAATAAAAAGAGCATGGGGG  
ATCCCTGCATTTAATATTTTTTTTCTCTTAAGTTAGCAATTATTCTTCA  
GAATGTGAGTACTGGCTGCTGTATGACTTACAAGAGATTTTTAGGGTAAA  
GTCTCCACAGTTTTTAAAAGTTAAAGGATGCTTCTTAAGGATTATACCTA  
CATATACTTGACGGTTTAAAGCAACTTATCTGGAAGACTCATTGATCAGT  
GTTTTTTTTTTAATATTTATGTGTGAAGTGTTTTATGAATGCAGGGCATT  
ATTTTATAATTTACAACCTGCATTTGGCCAGACATTCTGAAAAGGGGTAC  
AGCTCTTTCATTAAATCTTGAAAAAATTATATTGAAATACACTGAAAGAA  
AGGGAAAAAAGAATAATTCAGTGGGCTGAATAGCTTATTTCTGTGTGT  
ATAAAAGAAAAAATGTTAAAGCCAGTTTTTTTCTAAAGTCTGAATATACA  
ATAGAACGGAACCCATATTTCAATTAAAATTGAAATTCAAATTTTAATT  
GGAAAGTGGTTTTACTTTTGCCCTCAAACCTGGCCTTACCTTTCAAACCTT  
CTATTTGATACTAATTTTTCATAAAGTTAAATTTCCCCACTGATTTGAAT  
TTTCTGTTTGCTTCTCTGCTGTAATGGAACCTATGACACTTTAACAGGTTA  
TTTTTCACTGTTACCTTTGAAAAAGTACCACCCATATTTAGTTCCTCTGT  
TTAAAACAAAGTAGATTGAATAAATGGTTAAAGTGCCAACACATAAGTGA  
TATCGAAAAGACTCGATGATGTACTCTTTAATTTCTATGCGAAAATTTTC  
CAATTCAACTATTCTAATATTGTAGCACTTTTTTTCTTTTCAAATGTGAAT  
GCTTAGTTTTGATTTTTTGGGTCTGTGTTATCCTATTATCTTCTTATCCCTT  
TTCTTTTTTTTTTTTTAAGATTTTATTTATTTATTCATGAGAGACGCAGAG  
AGAAGAACGAGGCAGAGACACAGGCAGAGGGAGCAGGCTCCATGCAA  
GGAGCCTGATGTGGGACTTGATCTCGGGTCTCCAGGATCACACCTGATGG  
TGCTAAACCGCTGAGCCACCCAGGCTGCCCCCCTTATCCCTTTTCTATC  
CTTTTTTCCTTCAGATCCTCATCTGTTCTTTGGAAATATAATTTCTTTTA

AAAATGCAGATGGTCAATTTCTTTGTCTCATTGTTTATCTAAAATTTTCC  
TTTTTAAAAAAAAAAAAAGGATTTTATTTATTCATGAGAGACACAGACAGAG  
AGAGGCAGAGATATAGGCTCCCTGCAAGGAGCCTGATACGGGACTCAATC  
CCAGGATCCTGGGATTACACCTGAGCTGAAGGCAGGTGCTCAACCACTG  
AGCCACCCAGGCATCCCTAAAAATTTACTTTCAACTTTTCTCATCTTCAA  
AAATTTTGCAGTTGTTCTTAAACAATAAATTTGCATGCAGTATATGATAT  
ATTTGTACTTGGCACATGTAGGAAAACCATATAAACTCTCTTTATAGCAG  
GTGATTTTAAGTACAGATAGTTCAGAACCTGTGTCTCATAGCCTCTGGTT  
TTAACATTAGTTGGACATAAGAAAAATTGAAGTGTGCGACTTAAACCGTA  
ACTTTTCTTGAATAGAAAGAACGGAAAAAATGGTATTTTGGGTGGCCTAG  
GTCTATGACCCTAAGATTTATGGGATTTGGATAAAATGATGTTTGTGTGT  
CACAGACTACGTTATTTTGTTCATCAGGAGACTGTAAGCATTATAGATTC  
TCTGAATAATTAACTTTGACTTATCTGACTGTTTGTCTCATTTCAGTT  
TCAGATTTTTTATTTAAATTTTAGTGAGATGATGCAATGGATTTTCACAAT  
TTTTCCACTTTTTGCCCTTTGTAGAGAAACCTAAATATTGTATCAGAAGA  
CAATGAAATGTATTTACCTGAGAGGGCCATAGGTACTTGGACTAGAAAGT  
TGTGTGTGTGTGTGTGTGTGTGTGTGTGTGTGTGTGTGTGTGTGTGTGT  
ATGGACAAAGAAAGAGCTCTTAGGTTTTTACTTGAGTTGTCAAGATTTGC  
TCAGAAACCCCTGGGAGAAAAAGACACTACGTGAGACTATAAAAGTTAAAC  
TTATTTATGTTTGTTCATTACATCATTTCAATCATCCCAAAGTCAGTGCT  
AGATGATTCCTCATCGTCTATTCTTGAAAGTTGACTAGTTTTATGCGGTT  
TGACCATTTACCTTGGAATATGATTCTTTGGCTAACAAGGATTCTATTTT  
GCAAAAGATGGTCTCCCTCTTGAAACCTCCACTTGCGAGCCAGGTTAATAC  
ACATCATGTTTTTCTGGGCACTGCGATGATCATACCAATCACAACAAAGC  
CTCCGCTTGACCAATATAGGGCCAGTCCCTATGTATTGATCCTGACATTGA  
TCCTCCAAAGTGATCACACCTCTATTCTGTAGCCATACTCTTGGGAAAAA  
TATTATTCACAATTTCCCAATCACTGAAACTACTCTTACCTCTTTTTTTTT  
TTTTTTTTTTTTTCTGCTTTCAAATTTCCATCATCCCACTGTCCTTTTCCT  
TGGAGGAACATTCCTAAGGAGGGCAATTTACCAAGTGTTTTTCAGTTCTT  
TCTATGTCCCTGGTCAAAATCGTTTATGAAATACCCTAAGTCATGATTTG  
ATTTTGACTGTACAACCTTGAAAAATATTACCTATTTGTCTCAAGTTAGGCC  
TCCCTAGTGTTACAGTGATGTTTAGAAGACTGCCTTCTAAAAACTCTTTA  
TAATCTTTGAATGTAGACAAGAAATTTTAATTTTACTGTCATTTTATCAT  
CTTAGTTCTGTCTCTGGCAGCCAACTCCATGATTATACAAGACGAAAAC  
CAATCATTAATCATTATCGTTAATGAAAACCAATCAATGGAGTCTAAAT  
TAAGGAATCCATTTACTTAGATAATAGAGACACCAAATGGCATAGCCAGT  
TTCTTATGTTGCCAGAAAATGTTTGACTAATTTTTCAGACTATAATACTC  
ACGTCAGTACATGTCTATTTTACATATCTGTCAAATGCTAGCTTTTATCC  
AAGGAGCTTGGATAAAACAAAGATTACTTTTCTGACACTCTGAAGGCAA  
CTTCATTCCTTTTACAAGTGTGTGGCATATGGCCTTATACTAAATTAATT  
TCTGATTATTAATAAAATGCACAGGAAATTCATGTACCAAATTATAATT  
AGAGAGTCACCATTCAATTAAGGTGCATTTATGTTATGCACTGTTACATG  
TGCTTTCTATACATAATCTTATAAATCAACTCAAACTGTGTGTATGTTT  
ATCACCATTGCACAAAGAAGGAAGCCAAGAAGGAGAAGTTAATCACACAG  
TTAAGAAATAGAAGTAGATTTCAAATCATGATCTGTTTGAATCTGTATGT  
CATGGCTAGTCAATCTGGGTCATGGCTAAAGAGTTTTTCATACATCACTGC  
CTCACTGGCAAATATCTCAAACCTCACAATGTTGGGCAAAATAAGACTGCC  
TATTATTTTGTCTTTTTCTTTTACCTTGATCTCTCCCCCTTTACTCATGAC  
TTATTCCTTTTCTTTTTCTTCCCTCATTTTTTTACCTCTGCCTGTGACTTAT  
AGTTGCTGAAGGCATGCCGGGCAATTAGTAGTACCATTGTCATCGGTAC  
TCATGACTAAGTAAGTTGATAAAATTTTACACTGAATTAACATCTCACTGC  
TGCTTTTTTCCAGTGCATAAAATAATAGGCTCCCCCACAAAAAAAATAA  
ACAAAAAAAACAAAAACAAAAAAAAGAAAGAAAGAAAT  
GAAAGAAATAGGACCCAAATATGTTGTATTCATACAGCCTGATTCTACTC  
ACATGTTCTAGACTTTGCAGACTGTGATTTAAACACATGCACACCACTGT  
GATCAGGAACTTTGGGCAGAGTCCCTTGAAATATGATCTTCCTTTGGGG  
CTTCCCAATTTTTACATGGGTAAATGGGAATAAAAGGGAAGGTGTCTCAC  
AGGCGGAAATGTCCACAGGCTAAAGGATAAAAATGGTATCAGGAATTCT

TCCTACCTAAGACAGGATTCTGGACGCTCAAAGTAGCTCTCATTTTAATG  
TTCATGAATATTGCCTTGAGATCTTATTAAAATATAACTTTTGATAGAAT  
AGGTCTAGAGTGGCACCCAAGACTCTGCATTTCTAACATGCTCTCAGGAA  
GTATAGATGCTCCTGGACAGTTGAGCAAACCCAAACCCCTCTCTGCCATA  
AATTTATTCTGATTCTACTACCCCTTAGCACATGCATCCTTAGCTTGCACT  
GTAGCCAATAGCAATGTGCTAGTGTGTGCGGATTTGAGGATAACAACATG  
TCATTGCCATCAGGCACTCACATTGGGATGAAGCTTTGTGCAGATGCCCCA  
ATAATTGCAGCTGAATTTTATCAGTCGATCTGGAAAAGAGACATCGGTAT  
TCTTGCATGGCTCCTCAAGCTGAACACCGAGTCTCAGAATGAAGACTCAG  
AATGAAGGAAGAAGACTAAGAGGTTAAAACAAGGTGGGCACTGTAATAGA  
TATATTTTGCAATTTTAAAAATTTCTTTCTGCATTCTGGTATTCTCTTTC  
CAGGACCAATTAAATGCTAACATTCCCTTCAAACAAGGATGTGTGATTAA  
GAAATTATTTTAAATTAACCTTAATAAAGATTTTTTTTTTAAAAATCTAGTT  
TTCATGGTGATCATAGGCACCAACAGGTATTTGTTCCCTCTGTGAGGAAAC  
AGGGACTTGCTTTGGGCAAAGCACCAGTACCTATATTGTAGTAAATGACA  
AAGTGCATGTCTGGTTAACTATATGTGTCCATTTGGCTAGGCCATGGTG  
CCTAGTTCTTTGGTCAGACAGTAGTCTAGATGTTGCTGTGAAGGTATTTT  
CCAATGTGATTAACATTTACAATCAGTTCCTTTTAAATTAGAAGAAATTA  
CCCTTGATAATGTTTGTGTTGGCCTCATCTAATCTGTTGAAGGCCCAAGA  
GCAAAACCACTGAGGTTTCCCTGAGCAAAAAAGAGTTTCAGCCTCAAGACCA  
TAACATAGAAATCCTGCATGAGGGGCAGTGGTTGGCTTGCCCAGTGGATC  
ATGTGGTTCTTGATCTCAGGGCTGTAAGCGCAAGCTCTGTATTAGGTGCA  
GGTTACTTGAAAAAATAAAATCTTACCAGAAAAGAAAAAGAAATCCTGCA  
TGAGTTTCCAGCCTGCTGGATTGCCCTGCAGACTTCAGACTCAAGACCGT  
AACATCAAATCTTGCCCTCAGCTTCTAGCTTGACAGCCTTCCCTCTCTCTC  
CTTCCATATATATATAATATCGGACCCCAGGGTCCATGGGAGGAATGCAG  
TACCTACAGCAGCAGGGTCATGAGATGGAGGCCTGCCTGGGAGTCCCAGC  
AGTGAGCTGCTTAAATTTCTTCTCTCTCCCTAGCCCTCTGTCGGCCTGC  
CCCACCTCCTGCGTGCATGCACATATACTCTGTCTTTAAATAAAATAAAA  
ATAAAAAACAAATAAAAAAGGAAAAAATATATATATTCTTATTGGTTCTAC  
CTCTATAGAAAACAGATACAGTGGCCACCTTGCTTTAACCTTTTAGTCTT  
CTTCCCTTCATTTTAAATGTGTACATGTTTCCTTAAATATGTTGATTGAA  
ATAATAATATTTAGTTTCACTAAGAAATGTATGTTGTATCATTCTGCAAG  
TATGGTACCTATTTCTCTGGGTGGATGATTACTGGTCCCAAAACACCCAG  
AGAGGTGTAAGTCCTTAGGGTATATTTAGTAATTTTGGAGATGAGGTACA  
TGTATGAGAAAAGATAATACAAGGGATTTAATAATCAGGTGTTAAAGTGG  
CTAACCAGGTGCATAGTATCAGTTATCAGTGCTGTAGCTGTTTAATTAAG  
GAAGGAGAATTTAGTGGCACAAATAAGGTAGGAGGATTGACTTGAGCCATA  
AAATTGAAATGGTTGACATTTTTTGGCAATAGGAGATTGTAGGGATTGGG  
ATATTAAAGCTCATACCACAGGTAATGGTATGAGTCAACAAGCAGACGTA  
AAAATGAGATGTTACTGATATAAAGGAAGTCCAGACTTATCAGATAATCA  
TGCTCTTATTTCCCTCAGGCGATATGCACCTATATCTTGAGCATCTGTTAC  
CTGTACAGAGATACTCCTCTGTGACTATGCAGCAGAAATATTTTCATGACA  
GTTGTGCCTTCTAAAGGGAGTGTGATTTTAACATTTTCATATGAAGGTCAA  
AATTCAGCAGTTTTTTTTTTTTTTTCATGGTAACCCAGCACAGAGTGATGT  
GATGGAAATTAACACCTTAAAAATATATATGTGTGTGTGTGTATATGAGTA  
TATGTGTGCGTGTGCATGTGCGTGTGTGTGTGTGTATAAAACACAGCCCC  
AACTGGACTTTTTTAAACCTCTGCTTCCCTGCATCTTATGACTAAGTGTGG  
TTAATTAAGCCAAGATCACTTTTCCACTCCACCCATACTTCATAAAAAC  
CTGTTGTAATTTTCTTGTATTTATTTGCTCTTTTGTATTTTTCTTTTGC  
AATTTGCTAAACAATAATCATTTCAAAGGAAAAGACTTTCATATCAATA  
GGTGACCCAATGATTTACTGATCCTTTTAACTGTGAAAAGAGAAATCC  
ATTACCTTCTGAGGTGGCAGGGTAGGAGACGAAAAGAAGGCCTCCTAAC  
AGTGGTGTTCTATATTTATAGCTTTGGGCTTTTGGCTCCATAAGAGGTTT  
GGGGGGGGGGCGGTTGGAGTGGAGTAAATGATACTCATTTGTAAGTAT  
CAGCCATATTCACCAAGAAAAATGAAAATTTGATTTGTGGAATCCATTAA  
GATATAAGCATGAATAATAACCTGAGAGTTAGCAGGGTGGGACTTTAAAA  
GGTACCTGAGTTTTTAAATGCATTATATTTTGCAGTTTCAAAGTATGTG

TTCCAAATGGTGAAATGCATGCCCAAATCTGGCCCATGAAATAAACATT  
CAAACCAGAAACCGTATTTACTTTGGCTTCATTTTGGCCTTTTTCTCTTT  
TATCCATCAATGAATCAATCAATTAGCATTTTTAGGGAGTCTCCTGTGGG  
CCCAAGAGGGTGATGAAGAGTATGGAAGAAGCGAGGACTATATATACACG  
TAAAACTAACAAAAAATTTGGGATTTCAGTCCAACCTCTTTTGGGGTCAA  
CTCTTCTCTTTCCAATTGCTTCCCAAATATCTCCTAACTCAATAACTAC  
TTCTTACCTAGTGTGGCCAGATTTCAGCAAATATAAATACAGGACACCTGT  
ATTTATCTGGCAACTCAACCATCCATGTAATCCTCATCATCAACACTTTC  
CATAGCCTTCTGCTCAAAGATAGATCACTGTAAAATATTAGCAAACACCC  
TGATAACTCTCAAAAATAAAGATATTGTCTGCCTATTGTTATAACAATA  
CATAGACTTGAAAGCTAAACCAGGAGCTGACTCCATAATTTAGTGGTAAAA  
TTCAGCAAAGTGAAGAACACTTACTTTTTTACCCTCCCCACCCCTCCCC  
GCCTTGTCTTTTTGACCCTGTTTCTTTGAACTAACACAGATCTTTGCTTTG  
ATGCTAATGAGAGTAAAGAAGAGATTGTAGGCACTGTCTTCTGGGAGCCA  
TTTAAGCATCTCCAAACCAGATTTCATTTCTTGCCACCTACTGCCATGCTA  
CCCACACAGAAGTCGGTGCTTAAAGAGATTATTCCCAATAGGAGAGAAAG  
TGCTGGAGTCTTTTTCCCACTATTCATGGCAAATAGCCTACTGCCCAGCTC  
CCTGGCATTCTGGCCCATGGATGGTTACAATCCCAGACTGTGGCAAAGC  
ACTGCTCTTTTTTTATAGAAAAATCTCAGGGCTCTTGGAATATTGATTGCT  
TGGGGCTCTAACTTAGTCTTAACCCAAATTTTCAGAAATTTGTATTTCTA  
TAGAGGTAAAACCATACATTTAGGAATCAGAATATAATTTTTATTATCTC  
ACAATGTCCACCTCTCTTTCTTCTCCCCCCCCCGTCTCTCTCATCTC  
TCTCTCTCTCTCTCTCTCTCTCTTCTGAATCTTTGTCTTCTCCTCCAC  
TCCTGCTTCTGAAAGTGCTGGCCAGCTGGGACCTGCTTAGAAAATGAAAA  
TATTCATTACCCAGTCATTCTGCCACAGCTGTGGGGAACCTCTGCTGCC  
AGCCCCAATACCAAGGCCAGGGAAGTCTAGAGTTTCGCTGAAGTTTGCAA  
AGCTTTCAGTACATGTAGGCCAAGCCATGATTTTCAGATGGAAATCGTGTG  
ATATGTGGTCATTTTGCCCCAAACCATGCAAAGCCTGGAAACGTAGTGG  
ATGTTTAAGCTTGCATTAGACTTGGAGGGAGTGTAGAGTATGATCTACAG  
GCACAGTGGTGATGGGGAAATCCAGGTGTGTTGGACACCCCAGCAGTGGC  
TTGCCAAACCTTTCTACTGAAGATGACATTTACCATCTGCTTCCAAATAG  
CATGGCTGTATGTGTTTAAGATTTTTTTTTTCCCTAGAAGGAACCCCTCATC  
TCCTGGAATCAGTGTCTTTATTCACTCTTCAATTGCACAGAATTGGCTTT  
GGAGAACAGCAATTTCCAAGAGAATGTCGTGCTGACTTAGCAATACCAAG  
GGTTTTTGCATGGTGTTTCTAGCCACATGGAGCATGTGGAGACTAAGATA  
CTGGCCAAAGCTATGCTAGAGAAAAAAAAAAAAAAAAACAACCTCAGTGTTT  
TTCTAGGTTGCTGAGAATTTAATGGACCACCTGTGTATCACTCAATAAT  
CAGATTCAACATTTAATGTCCTTAGATGGTGATATTAGGACAATAGTCTT  
AAGTATTAGTGGTCATTTGAAATAGGAGTTCCCATTCCAAAAAATGGGGT  
TAGGCAGTTTTCTCAGTTCCTTAATGACACGCTCAGTTCATCACCCAATA  
AGTGATGTCAGGGCTCCAAAGTTAAACTTGCTTTTGAGCTCAGCAATGC  
ATCTAGAGTTTCAAAGTCAAGGTAGTCAGAGGTGTTGTTGAATGTGTGAG  
CACCAATCAGGATTGCTCCTTTCCTATGTCTTCTGAATATGAACAGTGAG  
CAAAAATTTATATCCCATTTACTCCTTTTAGGGAAGCCCCTCATTCCATG  
CAGATGAGACTAACAGCACTGGAGACTCTTCCAAGGGAACATGGAATTCC  
CTAAATATTTAAGACAATTTTGTGTTGTCTTCTCCTGAAACGCAGCATA  
TAAGTACTTGCAAAATTACCTTGGATTTTATAGAGGTGGGGTATCTTGAT  
TTCCAGATGTCCCAAATCATATGGTTGAAAACCTTTATTACAGACTATTT  
TGGTTAATTTGGGGCGTTGTCCCTGATGACTTCCTATGTCAGAGGTTTGA  
GAAACACAAAGACTCAGGGGATAGAGACTGTTATTGTAAGAGGTGGTGGT  
TTGTGATGGGATCCAGGCCCTGGGTGTGGTTTTTTCAAGTACTACCTCTAG  
ACAGCAATGAGGTGCCAGGCTGAAACTAGCATGAGGACTGGCACGGTAGC  
ATGAACAAAACAGAATACTTCAGTGTGTTGTGTTTTCAATGACCCGGCTAC  
TTTCCTTCTCCTTTCCTTTCTTCTTAATTACCAAGATTCTGACTTCCC  
TGTGAGAAAGACCTTTTCATCCTTCCTGGTAGAGACAGAACCTTGTTGGT  
AGACAAGGACGTGATAACGAGATATAACTGGAGAAAGAAAGCATCTGTCT  
CTTGATGACTACCAGGTACAGATTTGTAGGTACTTTACACATGTGTAT  
TCACGCAGTTTTCTTAAAAATGTGAGAGACAGGCTTTCTGGCTGCAACTT

TGAGCCGCAAGTTGACTAGGCCAGTTTGCACAGTGGGCAAAAAAGTGAGA  
TTGGGTTTCAAATCCAGGTCCCTTTACCAAGGCTATCTATCTACCCTTCT  
GTGGAATTATACCTAAGTGCAATTTAATTGACAATTTAAGATTGCTGAAG  
TGGCACTTTTACAAATTCTAACTTAAAGGGCTATGTGTACATTTTTTTCAT  
AACTGCCAATTTATTGCTTCATTTTGCCATTTCTTTCTAAAGGAAATAAT  
TTTAAAGTTGCTAGAGAGACGAGAAACAAAGGACTTGAAAGCAATCTTTA  
AATAAGTCCAGAAAATAAACTCTCATCGTGGAGTGGGAGGAGGGGGGAAG  
AAAGTTCATGTGACTGGTAAGCCATTACTCTTTCCTATATGCTAAGGGTG  
ATAATGGTGATCAGAAGGACCCATACTGGAGTGATCACCATACGTCAGGC  
AGTCTGCTCTGTTTTCTATGTGCATTGTCTCACTTTCACAGCAACCTTAT  
GGGATACCTACCATTAATTAAGAGAGATCAGTTTATCCATGGGCATGTGG  
GTCTGTCTGAATCCATGTTTTCACCCTTTTCAGCACTGCATACTGGATTAT  
GCTCTTTCACCTTGAATGACACAAATAAAATACTGCTTAATTTATCAATG  
GTATATGATTTCCGAAGAGATCTCCTTGAATACCTATTAATTTTCATATA  
TTGTGGCAGGACCATCAAAAATCTGCAGAGGCAATCATATGCCTTGACCTT  
AAGGGTTGCCGGGTCTTTAAAAAAAATACATGTTAAAAGAAAATCAGCT  
GTTGGGGTTAGAATGAGCTAACTCATATTAACCTATCCTTTTGGCTGTTT  
TTTTATTAAATTTATATATATATATATATATATATATATAAATTAATGT  
AGGCTGAATATGTGGGCTTTTGTTTGTTTTTGTTTTTAATTTTTGTATG  
CTGATGTCTTCATTTTTTAATAGTGATACAGAGAGGAGACCATTGAGGGGC  
AATAGGGATATATATTTGGGGAAGCAGGGATGAGAAAAATATAATGGTCAG  
TAAAGTGTTGGCAGAAGGATTTTGTCTTGTCTCCAAGCATGAATTTAA  
TTAAGAGAACATAAACCCACACATTCAAAGTATAAAATTTCAAATTTAGA  
AGTGGAAGGCAAAAGAAATTGAATTTCTGAAGACCTGCTAAGTTATGTCT  
ACTTTAAATATATGCTTTGCCACCCTGTCAATACTTTTCCCAGGCTGATA  
GTATTTTACTCCTTTTGTAATCCCAAGTATCGAGGGTCAAGTAACTTGCC  
TAATGTCATATTGCTAGTGAGATATCTCAGATGCAAAAGCATGATCTTTA  
CAGTTATAAAAGCCATGATCTGCTTAGTACTTCATGCTGCCAGTCATGTT  
CCAGCAAACATTTTAAAGTGTGTCCTATATGTAAAAGGTCATGTGTAAAG  
TGCTGGGTTTTGGAGGAAATGCCTATCATCAGAAAAACATTATAAAAT  
AAAGTTGCTGATCTGTTTGCGATATTTGAGCGTTCATTTGTTGAGGGAAG  
GGGGGCTGTAAATAAACGACCTTGGGCGAGAACTTTTATATCTCTAGGGC  
TGTGATTCTGATCTGGGATCAGGAATCCGGTGTGATGCTGGAAAGAACA  
GTGGTTTAAACAACAGAAGTTTCTTTCTCTCAAAGAAAGCAGCTTGGG  
CCGGGGGGCTGGGGGGGCAGTCTAGAGATCAGATCCTATGGTCGAGTCCT  
TAGAAACCCCAGGACTTTTGTCTGTCTGCTCATTATTAATCAAGAGGTTT  
CCATAATTAAGTTCATCTCACATTCCAAGGTGTCACCGGAGTTCTAGCCT  
TTGGGTCTTCACTCTAGGTGGGAAATAAAAGGAAGTTAGAGAAGGGTGAA  
AGGGCAAATGCGAACACTCTACCCCCCTTTTAGGGGCTTTCTCAGACGT  
CTCACACACAACTTCAAATTACGTCTTATTGATCACCTTAGCAACAAG  
GGATTTTGCAAAGAAAGTCTTTGGCTGGGCACATTGCCACGCAGATTAA  
ATTTGAGATTCTATTACTAAGAAAGAATGGGATAATGGATATTGGATAAG  
CTACTTGAAGTATTAACCACAATTATCTAATCAGGTACTCACTCCCAGTG  
GCATGGCTTCCAATATAAATTCATTAATAAACATCCTCATTGCCATGTG  
TGGTCTGGGATCATTAAACAAATAATTGGATCAGCTGCCCACCTCAAGGGAG  
AAGCCATGGAACAGTAGGATTGGAGAGAATGTGTTTGAAACCATGCAGT  
CTGAGGACTGTCATGTGGATTGGGTAAAGAAGGAATGACTCACAATGT  
TAATAGAGCTTAGTCACTTGTCTTCTGGATCTGTGTAAACCATGTAGGAA  
TCCAGCAGGAGAAAGACGGCATGTGAAGCTGCGTTCCCCATTGGCTCCAA  
ACCAGATAGAGAGTCCCCACCCAGTCATCCTGATAGCTCTTTTTCAAGTA  
CTGCATCTAAAAATATTGATTTTATTATGAACAAATAATCACGTGATCAA  
GGGACTAGAAGGAACCCCGGATAATTTTCTAGTAGATGTAGGACTACATC  
TCTAGCCACCCCAGATAGCTTTTGAAAGTAGGTGTTTCACTCAATCAGCTT  
CCAAACTTGAAGCGTTTGGACTTATTAAACGATTTAAGAGTTTTATCCAT  
CTACCCTTGAGTTAGTTTTAACAACCCAGAGACTTTCTGTCTTCTCGT  
TCCCGACTCCTACTTTCCTTCCAAGGTTTGTGACAGTCTAGCTAGAGGCAG  
AGGCGTGGCTTGAATTTCCATCATGCAGCCTTCCCTCCAATCAGCCATGT  
CATGGTGGAATTTTTATTGGTCATAAATTTTTTTTACTGGCTAGATTAATG

TGATTGAAAGCATCACACCCAGTAAATACCGTCTGCTATTTGCTTTAGCA  
ATACCTGTGGAAAAGGGCAGCTTGGGACCCAGGCACCGTGGAGCTGGTGA  
AACCATTGGCTGTGCAAAAACGCGTTGGGGGCCCCCTTTGACTGATGACCA  
GAAGTTGCTCTTAGAGGGAGGTCCACCCAGCAAGAGGCTCCATTGGTGCA  
TGCCACTGCCATGTGTAGCCATGATTCACTTCACTGACTATCAAAGCTTT  
CTACAACCTTTGCTTGCTGACTTTTGACCAGAGGTTCCCTTTCAACACGAG  
GAAAATCTGCCTAGAGAGAGAAAAGAGAGAAAGCACATTACGGGGAAATAA  
ATGGCAGCGTGTTTTCTGGAGGTCTTGGTTTTTTATTGCCTGAGGAGCTTCG  
GCTTGAGCCTGCCCTGCGGCGTTGCCAGTGGATGTGTATTGTGGCATT  
TATGGAGCATGGTTTTATATCAGCATGGATTATTATAACAACAACAAGGGG  
GATATTCAATAAAACCTTGTTTTGATGGCAAATGCTCCACACAAAACACC  
TCTCCCAGGCCAAAGAAACGAGTGGAGTGTTTTATAAAAGCACTACCCTCG  
GAAATCTGCTTTACAGAAAACCGCCTTCTGAAACAGGTTTTTGAAAGAAG  
GTGTGTGATCTGGGAGTCTAGGCTCCCCATCTGTTTTCTCCCCTCTGACC  
CTTGTTGTTTTGACTACATGGTTCATGACCCTATATTGAGTGGGGTAGATG  
GTCTGTAAAGATGTTTCGTGCAGCTTCGCCTTCGTGCCTCCCAGCAGAGCC  
TGAAAGCCCTCCTGCTCCCTCCTTCCTGGAAGAAATGCCAGAATTTCACTT  
CAAAAAAAAAAAAAAGTTAGAAAAGAGAAACACAAACAGCAAATGTGCCA  
GATTGCTAAGGGGATCAAGGATTGAAATATAGCCTCAAAAGTTGCATGTA  
CATAGAGAAACCCCAAAACTTTCCCTAAACCCAACCTGGAACATTTATCT  
GCCTGACTCCCTTTAGTCTCAGGCCAGTTTTTAAACCATTAGATGACTTAA  
AATTATGATGCTGGCAATGGCTAGGTTAGATGGTAGCTGGGGGAATTTT  
TTTTTTTTTTTTTAATTCAGTTCCCTTGTTGTAGGTGGGGTTGGCAAGGCTGT  
GATAACCGTTTGGTGCCAACCTCCAAAGAACCAGAATGCCTTTTCTGGGCT  
GGAGTCCGTGTGGATCAGGGTTTGGAGATGCAAGTTGGGAAGAGAAAGAGA  
ACCCAAAAGGGGGATGATGTGGAAGTCTGAAAGGGTGGTGAAGGAAGG  
TGTAGGGGAGGGAAAAAAGACAGACCTCCCAAAAGATACAAGAAAAAG  
AGAGAGGAAGGGATTTATAAAATAGGAGGAATGAAGGGAGGAAGGAAATG  
ATAAGGGAGAAAAATCAGGAACAAGTCGCTGGAATAAGATCTGCAATC  
AAAAACATCTTTCTCTGGAATCACGAGGTTGATTCCAGAAGAGTTCTCTG  
ATGCTTTTGAAATCTCCGGCTCCTATTTTCCCCTCAGACCCCCTTCTTCC  
TTGTCAGGGACCAGGCCCCATGTAGCACCGGAGACCAGGTGAGCTTGTGT  
TTGGGAACGGCACACGCCAGGCAACGATCATGTGAATTTCCAGTGTATCG  
ATAGGGGGAGAGAGGGCCTTGATGAATAACAGAAACAGCCTTTTACATGA  
AACCCCATCCAGTCCACGACCAGCCAGTGGCTCTAATCTCAGCCGAATGT  
GCAGTGTTTTATTTTTCCAAGAATGGGGCCTTCTATGACTCACGGTACTCA  
GATGCTACTTACTAATGGACCTTGTTCCAAGTCAAGAATGTGACACACGG  
CGAGACACGCAGATCACAAACAACAGAACAGTTAATGGGGGGTGAAGCTT  
CGGTGACATGTGTCACACCAAAGGGCCGACTCCTCATGCTCCCTGAGGCC  
ACAAATGGAGGGTCTCTGGATTGTGTAATAATGATAAAATATTGCCATCT  
GTTGGCATCCTGTGTAAGCAGGCTCTGACATACATAACGTTGATGTTTTT  
CCAGACTGCCCTCTCACATGTCTCCAGGGAGGGGATATGTGAAAAGCTCTG  
AGAAAAGAGCAGAACATGGTAGCCTGACCTTATAGGAAGAAAAAAAAAAT  
AGCATTCTGAAAGTTCGAACCTGGAGGAGAACAGACTGCTGGACATTGGT  
CTAACCTCTTACTTCAAGGGATGGCAGCAGCTAAACCCACCAGAGGTTGC  
CGGCACCCAACCTAGATGGATCATACGATTATGCTTCAGATGTGTTGTCAG  
ATGATTTGGGGACACATGTGCTTCTCTTCGTGGTAGGTTTAGGGCATCTT  
AAAACCAGGGAGACTTTGATTTATTGCCAGAGAGTTAAAGGCAAGGATGT  
TTGAACTGTAAAAATCATACATATTATGGGCAAAGGGGTAAATTGCAAT  
AATTTAAATACCTCCCCTATAATCATCCGTAAATTCTGGATAAATAGGA  
CATAGTTGCTTTTTATTTTTATTTTTTTTTTGACAAACTTGCAAAATAT  
ACACAGAAATTGGTTGGAAAAAAGTAGACACTGGAAAGCAGTATA  
ATAATCATGTGATGCTTTAGAAGTCTCCAGAAGTATTTGTCAGACCTACT  
AACCTAGAATTTGGATTATTTGTCCATTGAGAGACATTACAATGCACTG  
AGATCTCTACATAAAGCTGGGGTCCTTGAGAGGCAGCAGCTTCAGAAGGT  
GAAGGAATAGTGAATAAATGAACTTGCAATACAGGGACTCTTATCTATA  
TTTGCCAGGCTCTGGCTGAAACAAACAAACAAACAAAACCTGACAAAAC  
CCTACATACCACAAATCCTAAGAATTTCAAGTTTAAAGTTTAAATTTA

CCTTATTTTTCATATTTTCAGGAACCCCCAAACCAAAAAAATTTATGGAAAA  
ACTGTTATCAGGGTCAGTGGCCACTGATGTAGTACCACTGTGGTGTGTCC  
CAGCAGTGAACCCAAAATTGTTCTAGAATGACTTACCCACAAATCACCCC  
ACAAGGAAGTCACAGAAAAGAGCAAATGAGAGAGAAATCAGAGTCCCACC  
AAAAAATCTCTCAATATTATATTATTGAAACACATGGGGAAAAATAAAACC  
AAAAACCTAATCAAAAACGAACTAGGGGTGGTGGAAAGGGGAGGAGGGCGG  
GGGTGGGAGTGAATGGGTGACGGGCACTGGGGGTATTCTGTATGTTAG  
TAAATTGAACACCAATAAAAAATTAATAAAAAAAAAAAAAACAACCTCCT  
CCATGAGCAATGCTTAAAAATAGTGGTGTGGAATTTTCTAGAACTGATG  
GATATGTGCTACTCAGATGCAAAAACGAGAAGTTTAAAAATATAACCAA  
AATTAATCTATGTTTAGACACCTTGTAGTGACTAAGGAACACCAAAGGCA  
AATAAGTGTAAAGTTTTCCAGGCAGAGTGCAAAGAAATTCATCTACACATG  
AATAGCCATTAAAGCCCCACAACACATGAGCAAAATTCAAAAGTGAGGA  
TTTCTTTAATCTCTCTAGATTTACGGTGCTTCTCGTAGAGGCAATATTCA  
ACGCATCGGGTTGTTTTCCACTTGTTCAAAAGAAATATAAAATCTGAATA  
CATATGAGAATGTATGGCATGGTCATAAAATGTATACACAACCGTGATA  
CTAACCTCACACTACCTAAATTTCTACCCACTTTGGTTCATTTCCTATGCAG  
TCACTGAGCTACAGTGGTTCTCACCATTTCAAATCACACACACCACACAA  
AGATAAAGAGGAATATGTGAATCCTCACTTGTATAACAGCAATACAGTTT  
GCATCCAAAGTGAGCGTCAACAAAATGTAAATAAGGATTTGTGGACACAG  
AGCATGTTTTTCATAATAAGACACATATACACTGAAATAATTTTTCCCTTT  
TTGTTGTTCTAGAGATCCTACTTTTCTAAGGATCTTATTCACCCAGCCAT  
TTACTTCCGAGCAGAATCTTCTACCTCAAGCTGTTTCCTTCCTTCCTTTT  
TTTAAAAAAATATTTTATTTATTTATTTGAGAGAGACAGAGACACACA  
TGCAGGGGGAGGGGCCAAGGGAGAGAGAATCTCCAGCAGACTCTGCACTG  
AGTGCAGAGCTAGGACATGGGACTCGATCCAAGGACCCCAAGTCATGAC  
CTGAGCTGAAACCAAGAGTCCAACACCTAATGGGCTGAGCCACCCAGGCT  
CCCCCTTCTTTCTTTTTTTTTTTTTTTTCTGTTGATCTAGGGAGGCTTT  
GGAGACTGTCAGGATGAAGGTGCCTTCATTACCACCAGCCAAGAAAAGTA  
ATTTTGTGGAATGTCTTTCTAGAATTAGCACATACTGATGTTGTTGCTC  
CAGGCCTGAGCCTATGAGTATGATGTTACATCATACTCTTTTTTCTCTGC  
AATATGTGGTTCATTATCCTGTAGGAATTTTTTACTCTTAAAAATTTGCA  
TGCACACATCCTAGGCCTGTAGATTGAAGATCTAACCATTCAGTCCCTG  
CTAAACAACATGAGAGGGCTTTAAGCGTATTGTTTTCATGACTGTATTTT  
CCCCTCAGTTTTATTTAAACTTTATTTTCCCCAGTTTTATATAAACTG  
GGCCACTAAGTTTGCTTCCCTCACATGATAAAACACTATTGCATTTATTC  
TCACTTCTTAATACCCACCACCTTCTTACAGCCCAGATTGAATTGTGTAC  
GATTTTGGTGAAAAGGCAGTCTCAGACACATTGCAGTATTTCCCAACAGAG  
CCAGCTAGTTTGGTTGCTTGAGTTATGATCCAGGTTCTGACTTGATTTTT  
CCTTTCCATCAAAGACTTATCCCAGTCTTCTTTCTTTCTTTGGAAATG  
ACAGACTAAATGTGGCTTTTACAAACCTCGTATATTCCAGATCATTTAAC  
TTAGGTAGCTTGAGCATGACCCTGAGGAGTATAGAATTGAAGTTCAATT  
CTTCACGGGTGTTTCAGTGCTCTCTGCTTTGTGGTTAAATAATATATC  
CCCAGATCTTCTATTAAAAAGTGGAAGACTATCAAAGAGAAAGGACAGT  
TGGACTACATATCTGGAGTTTAGAGATGTCTCGACATAGTTGACACCTCC  
CATTTTGGTTGGTTGACACCATAGTGGTTGACACCACTCGCACATTTTGG  
CCCCTGGATGGCTGAATATTATGAAAGCCCATCTCATTATTTTATGGCTA  
CGGCTCTAAATCTTTATTTTTTATCTTATTTTTTTTAAGAAAAACAACCAA  
ACAAACAAAAACAAAGTTTAAATGACATCACTACGCCGCATGAGAAATAA  
AATTTCTCGCATGTGTACTTTGATACACAGTGACTGTTTGTAAATGTCTG  
AGACAAAACTTGACAGCAAAATGGAAGAATATTGGAATTTATAAACTGT  
AAGCATCATTTGGCCATGTTGGACTGTGGCCTCAGAGTTTGTAAAGTGAT  
TTGGTTTCACTTCTCGAATGTACTTAGATTTTAGTTGAACGAAGAGCTGT  
GTTTGCACAACAGCATCTTCGCAATCCATTGTGCCTCCAACGTCTATCAG  
TTCATCACCAGCACACCTAGGATCTTTAACATTTAGTGGATTTAAAAGAG  
AAAAAGACCACTCCTGTAGGTGCCAACAATGTTCTAATCAGGGCTCGTGG  
TTGGTATCGCCTTCCTAAACGGAGGCTGTGCTCAGAATGTTTGTCTGCT  
ACAATTAATCACATGCTTTTCAAATGTCAACATAATTTTCATGGTCGGCT

AACACGTAGTATTTCATAATAGAGAAAAATAATAGAGTTACCATTAAAAAT  
TGATCTGTCACTGTTTCATTTTAAAATCGTTGGTTCTGCCTGAATAAACTG  
TATGGAATTTTAAAAGTTTCCATCCTGTGTATCCCTGCACGCTTGCTTGG  
AAAGTTTACCTGGCTTTCTGCATTTCAGCCACGCTTCTCCATTATGCAGT  
GCGATACTTAAATGAAAATATGATGAAGGAAATCTAGTAGCTCGATTCTT  
TCCGAAAGTCCTATCTTCGTGTCCAGGTGCCATGCGCATGTAGGCGATCT  
CAGTCTGTGCCATTTGTTGATATTTGAAATATGAGTGACTCTTGATGAAA  
GACAACAGAGCTTTATGAATCTGGGGGTGTTCTTAACTTTCCAGAAATA  
AGGATTTCTGATAGAGGGACAATTGACGCTTATATTCAAGAATATTTTCT  
AAAAGGGGGTTCCATGAACTAATAAACATGTGTTCCGGGTGTCTTTACTAC  
AAGCTTTGAGCCAGTTTCTTTTTTATGAAAATAAATGCGGCTATACTTAG  
AGAATTCCTCAAAGAACTACTTTCTTCCTTGGGCTACAGTGTAACCAC  
CCAAAGGCTAAGCTGTTATTTGTACATAACTTTACATTATAGATATGGC  
ATGGTCTGTGAGGTTTCCTTTAAGAAGAAACCAATAATTTGTGATCATTAT  
GATCCAAGTTCTCTCATGAGTTTGTAGATTTCCGCATTCTTAAATAATTAT  
GTAGATGAGGCCCAAACATGAGATCTGCACAATCCATTTTACTTCTGAAA  
AGAAAAGTGAAAGAGAACAAAAGACATAGAAGAGAACCTAAATATGTGGCTG  
ACTGATTATTTTTTATATTTTCAGTTATTATATATTGTATGTAGAGTATCA  
CATATATTTACCATATATATGGTTTCACATATAATGGCTATACCAGTAC  
ATTAGCACATTTTGGCCCCCTAGTACCCTTTACCACTTTATTTTTTTTAAA  
TTTAAATTCCATTAATTAACATACAGCGTATTATTAGTTTCAGAGGTAGC  
ATTCAGTGATTTCATCAGTTGTGTATAACACCCAGTGCTCATTACATCACA  
AGCCCTCCTTAACGCCCATCACCCAGTACCCCGTCTTCTCACCCCCCTCC  
TCTCCAGTGACCCTCAGTTTGTTCCTATGATTAAGAGTCTCTTATGGTT  
TGCTTCCCTCTCTGATTATGTCTTGTTTTATTTTTCCCTCCTTTACTCCA  
CGTTCCCTCTGTTTTGTTTCTTAGACTCCACATATAAGTGAGATCATATAA  
TAATTGTCTTTCTCTGATTGACTTATTTCACTTAGCATATAATACCCTCTGG  
TTCCATCCACATCGTTGCAAATGGTAAAATTTTCATTTTTTGATGACTGAG  
TAGTATTCATGTATACACACACACACACATTTTCATCCATCTTATTT  
ATTTATTTTGGAAAAATCTGAGAAAAGTCATATATGGAGATTTTGACAGT  
CATCTTATGAACAGACAAATGAAGTGAGCATCAGAGGACATTGTGTTTC  
AGCTATTGCAACCCAGAGCAAGTGCTTGAAATGTAAATTTACCCACCCA  
CTCCCTCTTCCCTGATTTTATCCCTCTTCTTGCTGGAATGGTCTGAATC  
TGGTTAAATCTGTAGCATATTTCTGAAGAATCCTGTCTGGCCCATGCAG  
AAGTTAAAGCTATGTCTATTTCAGACACAACAATCCCTTCCTCTCCAGTGG  
ATTAGCCCAACCTCAGCCAATAACAATAAACTCTCCTTGAGATAAATTT  
CCCACAAAATTTGTACAGATTGTCTGTTTAGACACATTACTTATAACTTA  
AAAAATAACTAGCTGCCGGGGCGCCTGGCTGGCTCAGTCAGTAGAGCATG  
TGGCTCTTGATCTTGGGAGTTTGAGACCCATGTTGATCTTAGATATTACT  
TAAGGAAACAAAAAAAATAATAACAACCTGGCTCCTAAATTCAGACTTT  
CAGGGATGGCAATGAAATTCAACAAAATTATTTCTTTTAAAGATTTATTTT  
AAAAGTTGGGTTCTCTTAGATTAGCCTAATTCCCTTTAAGATGACGGTCT  
GCAGCCACCTTGTTTTAGCAGAACAAATTAGATGGATCCTCTCAAGAGCC  
ACCCTTGGCTGGGTGAGGAGTGACCAACCATCAAAATTTCTGCATTTCA  
CATTTTCCAAAGAAGTAGAGTGAATAAAATTATGAATCTGAAATCGTGGC  
TATCGCATTTGATAGAGAAAAGCTAAGTAAGGGTTAAAAATATTGCCTCC  
ATCCATGAATGAGGATGGACAGCAGTTTACAAATATGCATCTGAAGTGT  
TCATACTGAGTGCTTGGGACCTTCAATCTTTCAAAGACCTTGTTAACTG  
ATAAGGGGAAAATATTATTGATTCCAAATATTAAAAATTATAAAAATCA  
AAAATTTTAATGATGTTGAAAGCTAAATTATAGAAATCCTTTAGTTACAC  
TAACATGTGGAATGTTGGACATTTTATTTTCTTTTACATTATATAGGTTG  
TAATCTCAAAGTCTAAGTACCTGAGGCCTAAGAAGATCTTAAAACCACC  
CTGATCAAAGCACCTGGAAAAGCTTTAAATCCAGATTCCTAGGCCCCAT  
TCCAGACCCTAAGACTCACACCTTCCAAAGTATGAACCAGGAATTTGTAT  
TTTTAAAAGCTCCCCAAAACAATTCTGATGAGTAGCCCTGTGTAATTGGAT  
CAAATTTGATTCTTTGCCAGATCCTGTGATAAGAACAGAATCTTATGCTT  
GTGTCTCATGTACTTAACAACCTGTCTTCAAATGTACCAATTGGCAATAT  
TTATCTAAATTATAAATTCATGTCCTTCTCTGACTCAGACATACCAGTTA

TGAGAATTTATCTTATATATTTACCTAGATGGAAACATATTTTTATTACA  
AATAATCGGGAACCATCCAAGGATATGTCTACTACTAGGAACTAGCTGAA  
TTAACAGTTGGACGTAACATACTCTAGAGCTGTAAGAAGGAACAAACACT  
TTGTGTCCCAATTTGGAAAAATACCCAAGATATAGTGTTAATGAAAAACA  
GAAAGGCCAAGTACAGAACATATTACATATTACCATCTGTATCAGAAAGA  
GAGGAAAGAAAAGCCTAACATCTTTTTGCCCTTTTTGTGTGAATTTTCTA  
AAATTGGGACACCTGAGTGTCTCAGTTAGTTATGTGTCTGACTCTTGATC  
TCAGCTCAGGTCTTGATCTCAGGCTCATGAGTTCAAGCACCGTGTTGGCT  
CCCCACCAAGCTTGGAGCCTACTTAAAAAAAAAAATTGGAGTATAATTCA  
TGTACAATATCCTATTAGTTTCAGGTGTACAACATAGTAATTCACATTA  
TATACATTACAAAATTATCACCATAACAAGTCTCATGACCATTTGTCAGA  
GATTAACATTTTTAGATACCTCATGTTATTAATAATCATGCAGTCCTTCTA  
TGATTGGCTTATTTCACTTTTCATCATGTTTTTTTTTTTTTCATCATGTTT  
TCAAGGTTTATCCATGCTGTTGTATATCGCAGGATTCCCTTCTCATTGAA  
GGATGAGTAATATTCCATTGCATGTATTATCACATTTTCTTTATTCATGA  
ACATTTAGGGTGTTCCACATTTTTTGCTATTGTAATAATGCTCCAATGGA  
CATGAGAGTGCGAATGTGTCTTCAGGATTCAGGTTTCAGCTCTTTTGGGT  
CAAGATCCAGAAGTAGGATCTCTAGAGTATATGGTAGTTCTATTTTTAAT  
TTTTTGAGGAACCTCCATACTTTTTTCCATAATGTCTGTACCAATTTCCA  
TTCTTACCAATATCACACGGGTTTCAACATCCTCATTGACATTTGTCTTT  
TGTTTTGTTTTAATAATTAGCCATTCCAATAAGAGTGCAGTGATAGGGAC  
AGGAGGCAGGAGAAAATGAGGACTTGCTAATCAGTGGGTATAAAATTTCA  
TTTATGCAAGATGGTTATGTTCTAGAGATTTGCTGTACAATATTGTACAC  
TAAAAAGTTGCTAAGGGGATAGATTTAAATATTCTTATCACAATAAAATA  
AAAAGTGAACAAAACGTTGTCTTTATATTTGCTTCTACTTCTCTAAAAAG  
AAGTAGAAATATATACACAAAAAACCTAGTAAATATGCTTGCAAATGAG  
ATGAGAAAGTTAAGGACTGTGGAACGTGGTAAACGTGGATAGGGCAGGAGT  
GAGATATTTTGTGTATGTTTATGTTAGTAGTAAGCCATATAAAACATAT  
ATATAATATATTTTTAAATAATTTAAATGCAAAATAATTTTGTTTTATC  
TTATGTTAGGAATTAATGTTCTATCACTTCTAGATGAAAATTTGTAATT  
GTAATGAAATTTCTTGATGACACATCCATACAATGAGAATTAAACTTAC  
TAGAGTTGCTTAAGAAAGACATCAAGTAAAAACAAAAATAAAACAAAAA  
CAAAACAAAAACAAACAAACAAAAAAAAGAAAGACATCAAGTAAACCCA  
AATATTTAGGACACATGCCCAGCCAGAGGATATAATGATCTGCCATCGGT  
CTTGGTTTGAAAGCTAAGTGCTTTCTAAATTCCCTGCAATGACTTATTTT  
CTTCACCAGAGTTTACTCTTGATATTTTCTTGCCAAAAGGCTCTCATCT  
TAAATCCAATAGTCTTGAGGCAGAACATGGCAGCCTCTGCCCCATTCAAG  
TATGTTTTTAATGCAATAACAAAGAAAAGGATAAATCCATTTGAAATTCA  
AAATCTGGGGAAAATCTGGAGGTGGGTGGATAGCAGTTAGCCAGCTTTG  
ACACAGAGCCAGAATCCCCAAGAGGGCACACCCTGATTATCTTTTCTTAG  
TCCAGTGTGTTTGGGGCAAATACAGAAGTGTGTGTGTGTGTGTGTGTGT  
GTGTGTGTGTGTGTGTGTAATAATACTGGAGAAAACCTGGATAGTGTGTGG  
AGTTAGAGCTTTTCTCTCATGAGGTTTTGATGAGAGATAATACAGATTTT  
CATAGTAAGATACTTCTTAAATATGTCTTCATTCTTACCTAACATGCCAA  
AAGAATATTTCTGAGTGGAAGCATAGGGGATTTCCAATTATCCACTGG  
ACCTTCTCACAGCACCATGCTGAAGCTTGTAAGGGGAAGGCAAGTATCC  
TAAGGGTTCCACCTACGCTCATGTTCCCAAAATACCACCTGCACCTCCAG  
CGAGCATGGCTCCCTTGCTGCAGGCTTTGGATTATTTTCCCAAAATAAAA  
GACACCCAACCTTCATGGAATTTTTAGTCATTTTCATTCTTAGGAGGATG  
ATTCACCAGGAGAGAATTAGGTAAACATATAGGAAAAAAAAAAAAAAAAA  
AAAAAAGACCTGTTGCAAAATATGCAGATGTTCTAGGTGTCATCTTGATA  
ACCAAACCTAGTACTGAAGTACCTTTGAATGACTGTTATACTCCCTGTCTC  
ATTGCCGACTGAACCTGTAGCAGCCATTTAACTTCGTATGTTTCAATTTCT  
GGATTACTGAAGCAATAGCTTGACCCTGCAAGCAGGCTTATGTGTGAATA  
TGTGACATTTACCCCTCAGAGCTGGAACCTGGATTTCAATCCAGGTAGCAA  
AAGTAAATGCGTTTTGCAGCACAGCCTCGCCATTGAAAATGTAAAGCAAAG  
ATCTGTCCTTACTGGCCTCTGAAAGATCTAACACATAATCTCTTTGAGAT  
TCTGTTTCCTTATCTTCAAGTCCTGACATAACGAAGTCTAGGGACTGTAG

GCGTTCATATGGCACCATACATGAAGGCAGTTCGCATCTATTTATTTGAC  
CTTTATGATATTATACATCATATGCCATTACTCATTATTAATAATAACCA  
TCATCATCGTCATCTTCATCATCATCATTTTAACTGTGAAGGACTTTTAA  
TGTATTTAATTCAAGTTTATTTTTCATGGAAGAGGAACTGACATCCAA  
GAGGTGTGGGGATTGCTTGGGTCAGTCTTCTAACTAATGGCAAAATAGTA  
GTATCTAGATCATAGACTTACTAATTCCAGTCTAGAGTTCTTTGTGCCAC  
ATCATGTGACCTTACCATCATCATGGAGAATCACTCTAAGTTCTTAAAAA  
ATATATATATATATATAAATTTATATACACTCATTTATATATGTGTGTGT  
ATGCACACATACATATATATACATATATATTTGCACAGAAAATGAAAAA  
TTCTATTCAATTTCTGAATGACCTTTTTATTTTTTGTAAATTTTATATTTTA  
TTAATTTTCTTACAATAAGCAATAGTCATTTTATAAGCACTTACCAACAA  
AAAATAAACCTTGTGTTGGTATTACCTCACCTGTAGTTGTTTGCAAATTT  
CTTGAAAACAGAGAACAAATTAAGGAAGAAGATATAAAAAGTACAATTACG  
CTAGACTTGTAGGCCAAGGAGATGAAGGGCTTTTCTGATTTGTTTTGTTT  
GTTTTTGTTTTACGCTATTCCCTCCAGTCACACATCTTCTGGGTAACAT  
TCTTGGAGAAAAAAGAGCGAGAGAAAAATTTTGCCTTATTGCTTGTTCA  
GTCCAGCTCATTTCTAGTTGGATTTTAACTGGGCATATGGTAGGCATTAA  
AACACTTGTTGAAATGTACTCCTTTTGTAGCATGCTCTAAATCAGAGGG  
AGTCCAATCACTAACCTTTTCAGATGTGTTTCAATTTTATGACATTATGCA  
CAGAAGATAGATCTGACAATTATTTTCATCATGTCTTATTTTAGAGTAGAG  
ATATTAAACAACACAAATAGGACATCTACTTGCCTTCATTTTTACTTTTG  
AGAAGGAAAGAGATTGAAAAACAAATTTATTTGAGTCCCAAACACATCAA  
GGCGGGTTTTTAAAGAGCTGGATTTCTTGAAGAATCAGGATGCACGAAGA  
TAGTGGAGTCTTCCCCTAATCTGCTTAGGTGGATAACCATTCCTTCCTTG  
TCAAAGGTAGTTGGAGATCTTCATCTTCTGATCAAAGACCTAGATTTATA  
TGTGAAGATGAAAGACTTCACCCCTTTATGTTTAAATCAGTGCTCCGCAACT  
TTCCGGGCTACCAGACTCTTGAAGATCTCTTTTTCTCTTAAGTCTGTGTG  
TGTCCATGACCATAAAAGGAAACAGTGAGAAAAATAAAGGGATGCCCTGC  
CCTGAGAGGGTCTGCATGTTCTGGGCTCTAACATCCACTCTGTTGTTATTT  
AATTGGTTGATTTTCAGCAGTGTGACTTTTCAGTGTATATTTATTGAGTGC  
ACAGTGATCTCTCTGGATTTTCACTTCTTTATCTATAGAAGGGAATAAAC  
AAGTAAGGTTACCTCTGTATACAGGAGATGGGGATGGCTTAGAGGGACC  
TAGAACTGGGACAAGTGAAAGATTTTGTGTTGTGAGTTCGTGGAATGGACA  
CCGGGCTGACTACAGATATTAGAGCAACTCTGCTCAGAACAGGTGTAAAC  
GCTGGACTTCTAAGTAAGATTTTCTTCGATTAGGGGTTTGGCTGACAAAA  
TAAATAATCTGGAGATCATTGTACCCTGTGAATTCTAGGTTTTTATCTCA  
GTTCTAAGATTCTTCTGTTCTAGTTATTATGATGGCAATTAAAGCGAACA  
ATTGCTACATAACATAAATATTCTTATTTAAATATATAATCCAAAATATG  
TCCCGTAGGACATTGTGATGGTGTGTTAAATTCTTCAAAGAGGAGTATCTT  
CTCACTTTAGCTTTTAAACACCTCTAGACTATGGATGAGTCTGACAAAACA  
AGAGAACGTAAGTTGGTTGCCCAAGATCACATAGTAAGTTAGATTAGTGC  
CAGCATTAGGATCTCACTGTTTTAATTGCTGGGCAAGTTGATTCCACCA  
ACTTAGCTGGAAAATTAAAGTGAGCATTATTAACACTGTATTAAAAAT  
TACTCTTACCAGACATGAATCTGTGGAGTCAAGACCTTCTGTGAAATTAC  
CTCTTCTCTTTGACTCTAAAATTTACCTTAAACCAATCTTAATGGACTTC  
AACTTTCTTTTCCATTTTTTTTTTAAAGATTCTTTAGTCTCTCTTGAGAGT  
CAGTTTGCTCTACAGAAGTGGCCTAAGTGCAAGGCAAATATCCCATTTAG  
CTTCTCAAGCTGAGACTCCCCACTATGTATAGAGTCTGTGCATAGTTTA  
ACAAGATTTCCACTGTAAATTTCCACAAAACCCACAAAAATTTTTGTCC  
CCATCTGTAAATAACTCCAGGTTGTTTATAGAGGCAGGATAATCTGCAGAG  
TTACTCATATTTAGAAGTACTGAAAGAATGGTTGTAGAGGTAGTACATGG  
CTGATGTTTCCCCAAGGAAAGAACCTTAAGATACAACCTCTTGCCAGTTTTAA  
TCTTGGTGCCAACATACCCAGAGACTGTGTCTTTGAAATATCCCTGCCCA  
AGTAGTTAAAATAAATTAAGAGGTCTGCCTATTCCAGGAATGGTCCCTAA  
AATGACGATTTTTTTCTTCATGTCCAGTGATTATGTTTTCAAAGGTGC  
TTTTAAAAACCACCTTTTTGCTAACGAAATGCATAATCTGTCCAAAAACA  
AGGCTGTGGCTTAGCAGGTTGTTCTACTCGGCTTTCCAGCTGAAGGTAAA  
CAGGATGCTTTGCTTAATTTTCCCTATTTTTCTTCATTTACAGTCATGCC

ATACTGTCTCCTCCCTCATAGCCTGAGGCAAATTCAGATGGAGCCACATC  
AATGTGGTCACACCAAGAAAAAATCCATTTCTCCTCCTTGAGTTTAGC  
ACAAAATCCCAAAAGAGAAAGAGTTAAAATAAAGAAGCATACTTGTATGT  
GCTAGAACTTTACTTGTGGAATAATTTGGAGGAGGTGCTAATGCTGAGAA  
TCAATTCTAGGGAAGTTAACACAGAACATAGGTTACGGAAAAATCCAAT  
GCGAAAAATCCAGAACAGACCATAGATGAAGTCTGAGTACCGTTTGAAAG  
TTGGTAGCTGATACTCATAGGAAAGAACAATTAACATAACCTTGAGATCG  
ATTTGTGTTATAAGATTAATTTCTGACTTGGTTATGAGCATTTCATGTCAT  
AATACCTTCACTGTGCCTGATTCTTGGATATTGTATCTTGTGGAAATGCG  
TGTTGATAGGATGCCGATGCTTTGCTAAAGCAAAATCTATGATCATCGTC  
TTGTATTTAATCTTAAAAATAAGTGCATCAGCAGATACATAATTTTCATAT  
TCTTTTTTTGAATTAACATATATCCCTTAGTCAAATAATATTTTTACTTATT  
TTTAAAGCTTTTCATGTACACATGCACTAGTAGGAAAAAGGGTCTTTGTTA  
TACTGATATTTTTCAATTACCTTAAACATATTTTTTAAAGTACTGCTTGTTAT  
TTACCCTAATACTTAATATAAAATCACAAAATTTACCAAGATAATAATGCC  
AACGCATGCAACTGTCTCTAGTTCTTAAATTGTAATTGCTTCGTAACCTTC  
ATCTTGCTCTTCATTTTTCTTTTACTCATATTGTGCAACTTCAGCGTTCCA  
TAGGCAGGGATTAAGCCATCAAAGTAGACGACCTCATCTTGGAGTTGTAC  
TTTCATAGGGCTGACCACTGTTCCGATAGGACCAACACGATGCCTGTCTGA  
TCTTAAACTTGTCATGCTTATTTTACGTCTAATGAATGTCTACAACTTGT  
CTGTTAATAGAGTAAAAGAAAAAAGAAGCTGCTCACAAAACCTCAAGAG  
GACTTTAAAGTTTTAAATTCCCTGTTTTAATTAAGCTTCTAAAAAATAAAA  
TAAAAATAAGTTAAGCTTCTTCTTTGTTTCCCTTGGGGAAAAATATCAATG  
AAAAATAATAGAGAAATTTGCACAGGCAGCGGTGCTGTGGACAAATACAA  
CCATACCCAAAAGCATTTCTGGAGATACAGAACTTATACAATGGCCACAT  
TTCAGATGTCAGTAAGAACATTTGTTCATCAGAAATAATCACTTCACGTTT  
AAAAATTTTGTGCCTTGGGGGTGCTCAGTGCATTAAGCTCTGAATGAAAA  
TTGAGTAAGCCAGTGATTTGAACCCATTCAAACGAAAAAGAAAAAAGA  
AAAACACCGTGATTATTTCAACGATGGATCAAACCTAGGCTTTAAGACC  
AAGTCCCTATCTTAAGCTTTCTACACAATGCTCCTATGTGGTCGACTAAA  
TCCAAAAAAGTGTCAGTTTCTCATAGTGCTCTAGGCATCCAGGTCTGGG  
TAGATTAACTTTCCATTCATGAAATGTTTCATTTCAGGTGTTTCAGGAATAG  
TGCAGGAAAAATAAATGAAAACCTAATATGTATTTGCATCGAGTCATTTT  
ACCATCAATAACCTGGACTTTACTGGAAAATTAGAAAGACAACTCTAAA  
ATTGTTTATATTCTTTACAAAAATATGCTCTCCATATTTAGGAACCTGT  
TCATGTAGTAAAATGAATGTATACCTTCTGTTTCCCTTACCATAAGCAGA  
CTGAAATTTGCCTATCATGTTTAGATACATAGCAGTGACTTTAAATATT  
ATCCATGTTTCAGTTGTATCTTTTTAGTTGTAAGTAAAAAGCATCTCCTA  
CAGTTACTGCCTGCAAGGGGCCATATTCTTTTGCAGTATTTACATTATT  
TCCTAGGTTACCTTCCCTGTGATGTATGTTTTCTGGATGAACTTTCTTTCA  
CTCCTAATATTATAATCCATCTCTAAATTCATGTTGCCTGAGTAAGGGAA  
TACTTTAAATATTTGTTGCTCTTGCTATTGTTTCCTTTGTTTCCTTTTTTTT  
TTATTTTTTTTTTTATTTTTTTTGAGAAGGGAAAAACCAAACTCTCAGTG  
TTGAGAAAAAGGATGACTTCCTTATGTTATTAGTATTGCTAGTTATAATT  
AGTATTAGTAGGTTTTTTTTAGTATTAAGACCAACAAGCCTTTACTGTGTG  
TAGGATCTGAGGGGGAGGGGACTTCTACTTGCATATGAGAAAAATAGAAA  
CTGCAAGAGGATCCCCCTAGAGAAAGGAAAAGTTTTTTTTTTGTTTTTGAG  
AAAGGAAAAGTTGAGTGTGTAACATTTTTTAAAAATCTGATATTTGAATAG  
ATGTCATATAAAATGGTTCTATCCACAAGGATGGCGAGCCATCCATCACC  
CCTCATTTACATATTCCAATTACACCAGTGTAGTTGATTTACCAGGGCT  
CAGTTAGGTTTTTTGCAAGATTTTGCTTCAGAGTGCTAGTGTGTTATTTAG  
TGGCACATCTGTCCACGAAAGTGCCAGGAAACGAAATGGTGCTGCCAAG  
GAATGCCGTCACAAGAGTCCTCGTTCCCGCTGTTGAGGCAGTCACCTAAT  
CCTAATCTCAGTCCTAGTATTTCACTGATGTGTGCGTGGCTTTACGTTA  
CTGATACCTCTCCTGCTTCTAGGATAGAGCTTAGTATATGCAGTCAAAAC  
AGTCTTAGGCTCTTTAAAAAAGATGAAAAATAAGAACTC  
TCACTAATTGAAACTATTAAGCCGGAAGAAAAAACCAGACCACTTATC  
TGCAAGAGAACAGCTTCTTTAATGTTCAAATATTTTCGTATCCACCTGTG

AGAACAGGGAAGCCGGAAGGATTACACAGCTTCACCCCTCTGCATTTAAG  
GATGGCTGAAATCAGCAGTTCTTTCCCATTCTCTTCCTTCAGTCAGAAAA  
CCATCTTTGGCTAAATTACCATTCAATTTCTCCATAATCCCCTATTTTAAT  
TCTGTTCTCCAAAGGGGGAAAAAATAAAACAAACCAAAACCCCATGCAC  
ATTATACTAATAAACAGATTTTTTAAAAGTACTCAGTCCAAAAACAAGGCA  
TCAGCATCATCATAATCCCTCACTTTGAATTAAATTCCGTTGAAATATTG  
ACAGTCCCTTTTTTTATTTTATTATTTTTTTTTTGACGGTCCCTTTATCTGA  
GAGTCAGATGTGGAATTATCCTACAAGTAACTCATCTGTTGCTTCCAGCA  
CCCTGGCCTGAGGCTTTTCTGTCTCTGCCTGCAGTCAGACCTCTACCAC  
TGCTGCACCGGATCCTCTAGATTCACTGCGGTGTGGCCCCTGACCTCCCT  
GACTCCATCTCCAGGCACTGGCCAAGGACCTCGTGTGTTGGGGAGTAGGGA  
TGCATATTCCTGCCCCTTTATCTCTGGAAGAGCAGTGGGAGCTGGTAGG  
CTTTTCGGTTTTGAATTGCTTGTGAAAAGGGCACTGAAAAATGTAAACACG  
AGCAGCTGCGGGAGCCTCCTTCTGTCCAGGAAGCATTTAATTTGCTTACA  
CTGGCCCATTTGGCAGCCCCAACCTGCGGAAAGTGCCTATTCTCCTTTCCGA  
ATGTCACGGTGCCGACCGGCTGACGGTTTTTTTGTCACTCAATCCCGCCAC  
CTAAATCACTTCTTTGTATCTGAACCCAGGGGGGAGAATAGCAGTAAGGG  
AATGAGCGAGGATGTGGTTATCATGAGATAATCAGAACCCTGGGGAGCTC  
AGATGCACCTGTGCTCTTCTGTCTTGGGCCCAGGAGGGTGATTAAGGCAG  
AAAGCCTGCTCCCTGTCTCCTTCACCCCATCACCTCTGATACAGCCTGA  
TCCACCGGCCTCTTTACCTGCATCCCCTGATAAAATCAGCTCACCTTGCA  
CCCATGACCGCATCCCCCAAGGAGAAGTGGCAAACAGCACTGGAAGCCAT  
AGACTGGCAAGGATTACCCATAAGACCCTATGGCAAGGGTGGTGTCAAG  
TGAGGGTAAAGGCCATTGGCCGGTGTCACTGGGATTTACCCTGCCCATCA  
CACCTGCTCCACCTGGGGCAGGCCACCTTGGGGGGGCAGAGCTGTTGGAG  
ACCAAATCCCCTCCATCAGTGAAATCACTCCGTGGAACAGGAAAGACAAG  
AGCGCTCTTTATTTCCCTTTGGGTCCAAACCTGTTTTGCCTCTGAGCCTTG  
GGTCACGAACAACTTTTATGCCAGGTGAAATGGAGTGTTTACAGGCGTGG  
AAAAAAAATTTAAAAAGAAGATGAAATTATTTTATTTTATTTTATTTTAT  
TTCCCTTCTCCACACTAAATGCGTTTCATTACAGCAGACTTCTCAGGCCA  
TATGCCAGAAATCTCACATATGAAGGAAAACCTAGTTAAAAATAAAACAAA  
CCAATCCCACCCATTTTGATTTCAACGTGGAAAACTCTTTCCATGTGGG  
TCAGTTATAAAATAAAAGTTCCGAGCCACACCAAGTGAACCTGATGTGTA  
CAGAGGATTTGGGGGGATTACGCTCATTCCCTCCTCCTAGGGAGGAGG  
TGGCCTTCTCCGCAGCTGTTCTGTCAACAGCCCAAGTGACTTGGCTGCTG  
AGGTGGTCTGTATATTATGTGCAATAACTGAGCTGTGGCTTTATGCTTAA  
ATCTGAGATATGTTTCCCCAAACACACAGACCAGTCAATGCAGTAGAAGA  
GCACAAGGGAAATGTGTATTCTTTAATGAATTGTGGGATTCCTTGATAAT  
CTTTTAATCATTTTCGATGCCAGTCTGGCTGGAGAGAGGGGTCCGAAATG  
CAAATCGGTTGTAGGTGGATTTTTTTAAAAATGCAAAATATTGGGGATCCC  
TGGGTGGCTCAGTGGTTTGGCACCTTCCTTTGGCCCAGGGCATGATCCTG  
GGGTCTGGGGATCGTGTCCCACATCAGGCTCCCTGCATGGAGCCTGCATC  
TCCCTCTGCCTGTGTCTCTGCCACTATCTCTCTCTCTCATGAATAAAA  
AAATAAAATCTTTAAAAAATAAATAAATAAATAAATAAATAAATAAATA  
ATAAATAATGAATGCAAATATCATCTGGGAGGAGTGAGAGGGTCTTAGAAA  
GTGGTTCCCGAGTTAAGACTTGGGACAGGTGTTAAGTCAAAGGACATGAG  
TGGGGCAGAGGGTTCAGAGTGGGAGAAAACAAATTGGTCTTTTGGTGAAT  
GCATGATTTTCCCTCACAATGGTTGAGTACTGTCAAGTCTCCATATCCCC  
TGCAGCAGCTGGTATTACCAGACTTTTTCTTCAGTTTTTGCCAATCTGATAA  
GTGTGAAAAGATATCTGCTATTTTGCATTTTTTCCAATTATTAGAGCATG  
TGAGCCTTCTCTCATGTACTTATTGGCCATTGAGAAATCCCCTTTTGTGA  
ATTACTGATTACAGTAATTTGCTCACTTTCTATTAATCTTTTTTACTTAA  
TTTTTTTTCAGCACGTATGTGTAAATTGTTCTAGTAACCTTTATCCACAGC  
TGACTCATCCACACTAATTTGCAATCATTAACCTTATCATATAAATCTCT  
TATGTACATAGATCAATCCTGGGCTCCCCAAACCATTCCTTGGATCGGTT  
TGTCCATTTCTATGGAATTTCTTTATTTGTAAGATCCTCACGTAGTATG  
CAATTTTTTTGTTATTAAAAATATATCTAAGAGAGCCTGTGAGTGACTAATG  
GTGAAAAATCTCCTTCCAGCATGTTTTTACATGTTTTTTTTTTTTTTTTT

TTTTTGCTGGAGCTTTAAGGATTAAAGGATTAAATTATTGATATCTTGTGC  
CACAATTTTTCTTGTACCAATTTTGATTAAATTCACACTTTTTTTCTTTAA  
AAGTATCCATTTGAGGGATGCCTGGGTGGCTCAGTGGTTGAGCGTCTGTC  
CAGCTCAGGGTGTGATCCTGGAGTTCTGGGATCGAGTGTGCGATCAGGCT  
CCTGCAGAAAGCCTGCCTGCTTCTCCCTCTGCCTGTGTCTCTGCCTCTCT  
CTCTGTGTCTCTCATGAGTAAATAAATAAGTAAATCTTTAAAAAAAAGTA  
TCCATTTGGTCTAAAATTTCAATATTCCCAGGAAATTGTATTGTATATTT  
TCTGATCTTTGTAAAATTCTTGATCTGTAGTTTTATTCATATTTTTTATAG  
CTGAATTTGTGTATTTTTTATTTCTCTCCATTTTTTTCTTAACATAATCTC  
TCGAATGATTTGTCTATTCAAAAAGTAGTTTTAATTTTCTTGATTCTTAT  
TATGGAGGACTTTAATTTCAAACCTGAATTAATATGTTGAAGCCATTTAAA  
GTAATGCCCTGAAAAAAAATTAAATCAAATACGATCTAGGAATGCCCTGC  
AGAGATTAAGTAGGCAATCATTGAAAGCTTTTTTTTTTATTGTTATAGTAA  
TTTCTCCTTTTATATTTCTAAATGCATTAATGACTGCTTTTATTTTTGGAA  
TTTCTCCTTTTGATTTTATTTATATTTCTTTTATTTTTTTAAGCTGAATG  
CTAGCCTTCATTTTTATCAGTTTTAGTATTTATCATGTGAATTTTTCTCT  
TTTTTTTTGTGAATTTTTCTCTTAAATATTTAATTGAATCTCACAAATGCT  
AACCTATGGTTTGCATTTTATTAATAGACATTTCACTATATATAAATTT  
CCAATAATCTTGGATTTTATTTTCTAGTTTTAGTCAAGTTTTTTTTTTTTTA  
TATTTTATTTATTTACTCATGATAGACACGGAGAGAGAGAGGCAGAGACA  
CAGGCAGAGGGAGAAGCAGGCTCCATGCAGAGAGCCCAATGCGGGACTCG  
ATCATAGGACTCCAGGATCAGGCCCTGGGCTGAAGGTGGTGCTAAACCGC  
TGAGCCACCCGGGCCACCCAGTCAAGTTTTTATAGATTTTTATTTCTTG  
CTTGTTTTTTTTTTTTCTCTTTAATTTTGTTACCATATCTTTTATCTTGAT  
GAGGAAATGTTCTCTGTCTACTGTCCTATTTTCACTTCCTTGGAATTTT  
CTAAGATTTTATGGTGGCTTTATATACTATCGATTCTGATTATCACATAG  
GCCCTTGTAAGGCTTCTTTTCTTGTCTGAATCTAGAGTTAAACACAC  
ACACACACACACACACACACACACACACACACACACACTATTAGATCT  
CCTTATTTATTTTTCTAGAGTTTTTAATTTTCTTATTATTGATCATCAT  
ACTTGACTGGACAATAGGAGAGATAAGTTGCCATCTACTCCTATTGGGAT  
TTTGTGTACTTTTAGTATTTCCCATAGCTTTTGTTTTCAGACTTTTGCCA  
GTATGTTGTGTGGTGCATATGACTCATACCTATTAGATATTCATTGTGGA  
TTGAGAGTTTTCATGTTCACTATGTAGTCATTTTATTTTATTTTATTTTA  
TTTTTTTTTTTTTTATGTTTTTTTTTTTTATGTAGTCATTTTAATGCCCT  
TTCTCTGAATCCACCTCTGTTTACAGGAAAATCAGAATCCTTATTTCT  
TTGAGCATTCAATTTGCTAGTTAATCTTCACTCCACATTTTTATGTTTAGG  
CCCGTCCCACCATCCCTCTACATCTTCTGTAAATCCCTCTGTGTTGGTG  
TCATGTTGGGTAATGCAGAGTTGCAGGGGGCACTGAGCTCTACAGTACAG  
AGCTGTAATCTAGTCTGGGAAAGGCTTTTATTTCTTTCTGCCTTCACA  
TTTTTATAGAATTTACATCTGTTGATAAAGTCTGAGAGTTCAAGCTATGA  
TCTAAGTTATACTCTCCATATGTATCGCTGCTCCCTGCTTTTTTCCCCTA  
ATTTTGTGTGTGTGTGGGTGGCTCCTTCTCATTATTCCAAAGTCTCACTA  
GCTAATTTTCCCTCTTGTGGACTCTGCAATCAGAATGTACATATTCTGT  
CAACTCCCTCTTCTAGAGAATACTGATGGGGCAACTAAAATACTCCATTT  
GCTCTTCTTTTCACTTGACCTCTTTTTTTTTTTCATCCCTGCACTGTTACTAA  
AATGTAACAAATGTACAAAATTATTTTTGTAGTTCCTTTAGTACTTGCA  
TCATACTTATAAATATAAATTTTACATTATTATTTGTTTCATATACTTTAA  
TTTGTATCTTTTAAACTCCAGGTATAAAAAAATCAGGATATGATGGGTAT  
CTCGTAATTTTTATCTCTGTTCCTCTTCCAAATTTTGATTTTTTTGATGT  
GTTGTCTTGATCATACACACACATATTTATGTATCACTGTATTATATA  
TGTCATACTCTGTATATATACTATATAGGCAAACTCACTTTATTGCACG  
CTGCTTTATTGTGCTTCGCAGATATTGACTCTTTTACAGACTGAAGTTTG  
TGCAACCTGTGTTGAGCTGCATTTGCTCTCTTCATGTCTCTGTGTTACA  
TCTTGGTAGTTCTTGCAATATTTCAAACCTTTTTTCAATTATTATTATTTG  
TTATGGTGATCTGTGATCCGTGATTATGACTTGCTGAAAGCTCAGATCAC  
AGTTTGCACTTTTTTAGTGATATTTTTGAATTAAGGTATATACTCTGCTTT  
CTTGACATAATGCTATTCTATGCTTAACAGACTACTGTATAAACATAAC  
TTTGATATGCACTGGGAAACCAAACAATTTATTTGACTCCCTTTATTGCG

ATGTTTGCTTTATTGTCAGTGGTCTGGAACCCAACCCGTTATATCTCCAAG  
GTATGTGTGTATATATATATATACATATAGTGTGTATATACACACACAGG  
GTACGTAGTATATATATATCATATAATATGCCATATATCCTACCACATATAT  
ATAGATTGACAGATCATTAGATATATATAACATTTATATTATCTAATTTA  
TAATCTTTAACTCTGTACCCATTCTAAACCCATTGTCGTTGCAGCTTTAG  
GCTGGCAGTTACCTGGCTGACACTTCTGCAGGATTTTTCTGTTGTTGAG  
TGTTCCCTCCAGCCATTTCTTCAAAGAAGGGCTCTAGGGAAATACTTTCCC  
TGAGTTCCTCCATACTCAGCAGTGTCTGCCCATTTCTTTTACATCAAACA  
GCAGTCTTCACATAGATGCATGCCATTTTTTATTTATTTATTTATTTATT  
TATTTATCCATTTATTTATTTATTTATTTCATTTATTTATTTATTTATTTA  
TTTATTTTTTGATGCCTGTCTTTACACAGAGAGACAATCCTGGTTGCCTT  
TTTATTATTATATATTGTCCGTGTATGTTGTGAATTGCCCATGGATCACT  
TACTGCTGGACGCATATTGGAGGTGGGGGGAGGGGGAAGAGACAGGGCTG  
TGTTACCTGGTAGATACAATCCTCAGTGATGGACAGTAAAGCTCCTATGA  
CCTTGTGTGTGCACGCGTGTGTGTGTCTGTGTATGAGAGGGAGAGAGGGA  
GAATGCCATCTGCAGGGCTGCTTACAACCTTAAACTCTGCTCCATATTCCG  
CCTCCTTTTGCTGACTGCTTCCTGCACCTATGGGGTATAGATCTGGATGTT  
TCCCTATTTCATTCTAACCCCCCCCCACCCCCAACCCCTCATCGCCCTGAAG  
TCCTGTTTTGCCAAACAGACCCCAAGAAGTCCCCATTGCCAATACAATTAC  
TCAGTTTTTAATTGTACCAACAACAGATAAGGGTTATTCCTTCAGGGTG  
CCCACCTACTGTGGAGAGCCGTGTCTCCTGCATTTGTCTGGATGTAAAGT  
GGGTGCAGGTGTGCGCTCCGGCTTCCCGGGTCCCTGTTTGATGATCAGTG  
CAGTCGGCAGCCCTTGAACATCCATTGTGGTTCCAGGTTACAGATGCCTC  
TTTGTTTCCTTGAGGATGATGCCTGTATTTCATTTCTTTCTTCTCACTCT  
TGTGTTGGGGTGATTTCCAAGAAGTAAAAAACATACTTGTCTCCACCCT  
GATATCTTAAACTGGAATTTTCATTCCACTGATTTGGGTTTGTAGTATTT  
TAGTGATTTCAGTTTTAAGTATTTTGCAATCTGTGTTGTGTTTTCTTTTAT  
GTGTTACGACACATATAAAAGTTTAATTTTTAGTTTCTGAACAAGTAGG  
TTTAGGGGCTACTTTTTAAAGCCATTTCTACTTGTATTTACCGTAGTTAA  
AGAAAAATGGTTTGAAGTAAGATTTTACATGTGTTGATATTCTTTTTGGC  
CTAGAGACGTTTTTTCTGTAAATATTTTATGAGGGCTTGAAAGTGACAAA  
TCTTTTTTAAAGTTGGGTTTCAGAGATTCATATCGATCAGGCTTGTTAAGT  
ACACCTTTTCAAATCTTGTGTTATTGTTTTTGCAATCAGATATTTCTTTA  
TTTAGAAAAAATACTTCAAGATATTCTGAATATAATTATATATTTGTCAT  
TTTCTTTTTTGGTAGTCTGCCCATATCACTCCATGTATTTCAAGGCTTAT  
TTCTAGGTTTATACTAATTTGTATTATTGTAGTTTTTAGTGTCAATTATTA  
TTATAATTATTAATGATTAAGCAAGTTCCTTGATCCTATGCATGCTA  
CTCGTCTTAAATTTATTACTTAATATTAATGTTGCTATACAAGCTTTCT  
TTTTTGCTTATTACATATTTTTCATCTATTGTTTCAAACATTTTTTATATC  
ATTAAGTGAATTTTTCCCTAAATGGTGTATGTAGGAGATGTTTGCTTTTA  
ATAGGCAAAATTAATCTATTCAAATTTATTTTGATTACTGATGTATGGAT  
TGTTTTCCATCATGTCAATTTGTATTTATATTTAGTTATTTTTTCATTTCT  
TTCTGATTTTGTAGATTAATTTTTTTTAAAACTATTTTGTTCCTTACT  
GTTTTTAAAGTAGGGGAACAAAACAAAATGCTTTGTAGGTGCCCTTGGTG  
GCTCAGTCAGTTAAGTGTCTGCCTTCGGTTCAGGTCATGATCTTGGGGTC  
CTGGGATGGAGTCCAGTCAGATTCTGTGCTAAGCGCAGAGTCTGTTTGTC  
CCTCTTTCTCTCTCTGCTCCCCCCTCCCCGACTCATGCTCTCTC  
TCTCTCTCAAATAAATAATACAATCTTTTTTAAAAAAAATGTTATGCTTTG  
TATTTTCTTAATTTCTCTAAGGAGTACCCTTGAATTTTAGCATGCATATGT  
AATTTTATATTTTCCAACAAAGCTCACAATTTTTCAGTCTATATCCTTA  
TCATCAGCAAGAATATTAGATAACTCCGCCAGGACTCTAGGCTTTATGCA  
CAAAACCCAATTTGTAAATTCATTGGGATTATATTTATATTATATAATGCT  
GGAATCGATTCTATTTCTCTCAATATTAAATCTTATTTCTTAAGTTCTT  
CAACTCCAGTGCATAAATTTGTTTTAACTTCTCATTTCTGAACTTAAG  
GATTTACCTTTCTGTCAATTACTTTGTGTAGCTTTTGCTATATTTTAGAAA  
AACATTTATGCACATTTAATATATGTGTATAGGGTGCTTTCCTCATATTC  
TTGTCCTCATTTCTTTTCTTGTGTGCTCCTGCAGATAATTAACATCCCAC  
TCTCTGGGCATAAGAAAGCCCTAAGTTGTAGAATTTTCCCATTCTCATGG

TGTAAATACTCCTACTGAGGTCAGTGTCAAGGTACCAATACAATATGAAC  
ACAGTCTCAAAATTTCTGAACGTTTAACTATCAACTCTTGCAAGGGCAAG  
TAACAGTGAGCTTGCTTTAGTACACCCTAGCTAGATAGCTCTAGTACAC  
TATTGTTAAATTACCATGCCATTAAAGTCTGAGAACTCTGCTTTTTTAA  
TTCAGTGGAATTGTCACTGGACTCAGGACTGTCATTTTTATCTGCATCCT  
TGTGGTTCAGAGTCAGTGGACCACATATTGGCAATCATATTCTTTGGTGT  
CAGCAAGAAGGTAGTGGGAAGAGGCCATAGTTACCTTTAATGGGTAAACA  
TATTTTAGTTGTTATGGACTGGCATTTTTATTACTCTTTAAGCATCTTT  
CTCCTAAAATCCCAGCTTTAGTATGTCACAAAACCTCCATTTTTATTAC  
CTCAATTAATAAAACCACCTCTTCTGAGTTTGCTAGAGATTGAACATTT  
ATTTTCCCCCAAAATTCATATGTTGAAACCCAGTCCCCAGTATGAGGGCA  
TTTGAGGTTGGGGCCTTTGGGAGATGATTAGGTCATGGAGGGGGAGCCCC  
CATGGAGGGGAGTAATGCCTTTATAAAAGAGACTCCGAAGGGCTCCCTCA  
CTCCCTCTGCCATGCAGGGTCACTGCATGAAGACAGATGTCTATAAACCA  
GAAAGTAGGCTCTCACCAGATGTCAAACCTGCAGGTGGCTTGATCTTGGT  
TGGACTTGCCAGCCTTCAGAACTGCAAGAAATAAAATTTAGTTGTTTACA  
CACTACCTAGTCTACGGTATTTTGTTACATCAGCCAAACATACTAAGAC  
ATTGCTTAAGCCAAAAACATTAAACATCGTCCTTGATTCCCTCTGCATCTC  
TTATTTACAATAATCCTAAATCATATTTTCCAAGTATTCTGCTTCTTTCC  
ATTCCCATTACAATCACCTAATCAAACTGCCATTAACGGTCATCTGTA  
TCTGCACCATTCTATATTATAATTACTTGCCATATGAAGCCATTGAACAC  
TTAAAAATATGGCTAGTCTAAACTGGGTGTTGTAAGTATACACTGGATTTT  
AAAAGCTTAATACCCAAGGAAGATGTAACATATCCCATTAATACTTTCA  
TATATTGATTACATGTTGATATGAGAATATGTTGGATAGTTTGGGATAAA  
TTAACCATATGATTAAAGTTATTTTCCCATTTCTTTTTTCTCTTCTTTT  
AAAAAAGGTTTTAGTTATTTATTTGAGAGAGAGAAAGCACGAGCAGGGGC  
AGAGGGAGAAGGAAAAGAAGACTCCCTGCTGAGCAGGGAGCCCAACACAG  
GGCTGAATCCCAGGACCTGGGACCATGACCTGAGCTGAAAGCAAACACTT  
AACCAACTGAGCCATCCAGGTGCCCTTGTTTCTTTTTTCTTTAATGTGG  
GTATAAGAAAATTAAAAATTATATATGTGGGTGTCATTATATTTCTATTG  
ACCTAAAAACACTGGCCTAAACCTTTGCAATAGGTTCCCTAAATAGTTTCT  
TGGCTTCCACTTTTGCCCCCTCCCTCACCTGCTCTACCTATCACCTGGTC  
ACTAGACCGTATGTGATCTTATAGAATTGTGAATGAGATTATGTCACTAC  
CTGATCCAGTACCTTCTCATTTTACTTGAAATAAAACCAACTCTCCTCAT  
CATGGCCTTATTCATGATGGGTTTCATATGAGATCTAACCTCAGACTAGGC  
TTTGAAACATAACTAGCCCTGTGGTAGGTTGCCTTTTCTGGTCTTCTAGT  
AGTTCTCATCAATATCATTCCTGCCTCAAATTTTTGCATTTGCACATCTC  
TCTACCAGGAAATATCTTTCCCTCAGAGCTTATTATGACTCACTCTTCCT  
CATCATTCAACTCAAATGCTACCTCTTTGCTTTTTTTTTTTTTTTTTAAT  
AAAGGTCTTCCATAACCACCAAATATAGAGTGGTTAGATTTATATTAGG  
GACATGGAGCTATATTACTTGAACCTGCCTTGTCATCTCCAAGGGAGGTT  
TAACTAGGTCAAATTATTACTATGTATTTTTTACAATAAAAACTAAGTTC  
CATGAGAATAAAGATCTTATACCTCACTTCCTGTACATATATGTCCTCAA  
CAAAGAATCACTGAATGGATGATAGAATAGAGTTAGGCAGTCCTGAATTC  
AAATGTGAACCTCTATTACTTATTAGTTAAGTAAATAAAGAAATGTTCTT  
TATTCTATTTGAGCCTTTTTCTTTTTCTTTTTCTTTTTCTTTTTCTTT  
TCTTTCTTTCTTTCTTTCTTTCTTTGTTTATTTGTTTTTATTTGAGCCTT  
TTTCTATTTCTCATTAATATGAGATAGATGTTAAGCATAGTGTGTCAC  
ATAGCCTCTGTTTACTATGTGTAGGTATTGCTAGAATTATTATTTTTTA  
GTATTACAAATGTTACGACAATTAATGTGTGGAAGAATTGTCACAAAGAC  
AAATGCATGAAATTTGTGTGTTGTCACCTTTTGGGAAAAGTTGCTTATGA  
CCTACTTCAGGAGACACAATTGCATTTTTCTTCTTTTCATGGAAGTTTCAT  
TTGCTGAGTTCACTGAAATTGTCTCACTGTTATTTTGAGATACAGTCAA  
AGACTCAAAATATTCTTGATTTAAAAATTTACATTAGATTTTAACTAGAA  
ATATGAATACCTACGGTATGACTCAGTCATACAAAACATAAGACACACAC  
ACACACACACACACACACACACCCCTCCAAGCTTCAATTAGGAAAACGTG  
AAACAAGATTGACTGAATGTGGCTTATTTAGAAGCACAAAGCATATTACC  
TATTCTGAAAAATTTAGTAGCAAAGTAAGCTCTTAAACAATATTTTATCC

CAAATCTCCTAAACATATTTGATGCGTAGATTCTTTTTACTCATTTACTT  
AACTTGGCTCTAAGTTGTAAGGGATATCCTTTGGGAAATGAAGACTTGAA  
GTAGTTCTCAAGATTCTGTGAATCACAAACGAAAGTAAAAGGAAGTAGG  
CTGAACTTTGTGCAGTCCAACTTCGACTTGGCTGATGATAACTCATATTC  
AGTGCTACTTAAGACCAAAAACAAAACCAAAACAAACAACAATTTAAA  
AACCATGGCTTTGTGGAATGTACCAACACTTTACCTTAATCAAAGGAGAG  
AGAGCTTATCATAGTGTGTTGGGGTAGGATTTTTGCTGAAGAGCAAATCC  
CAAGTGATGGCCTGAATCCAAAACATAAGAGCAAGACCAGAGATGAGATC  
AGAACCAGAGCCTCAAATCCAAGACCACACAGAAGTAGAGATGAAAGTGA  
AAGGAAGCAGCCCAAGACTTTTGCTTTTCGATAGGAATTCTGTATCAGAGA  
CTTCCGTTTGCTGGTAGCAGAGTCAATCAGCCGGAGTTTAAAGTATGGGC  
TCAGGGCAAACCTCATCATTTTCAGGCACATATTTCTCCCTAACATCCAAAT  
GAAATCAATCTTGAGTCAACTGGGAACTTCTTCTTGTTACACCTCTAC  
AGATTACAAAATAAACATTTTAAATCATCTGTTATGATGCCTATGCATTG  
TCATCTCTTAGCTTTTGCATTTTCAACTTAAATGAAGAAAACCACTTTA  
AGCTTTTATTCTGAAGAAGTCATACAATTAGACAGTTTAAACCACTGAGAA  
ACATGCTCTTGATATATGTGAAATTTTTCAAGCTTAAAAATTTGATATTTT  
CCAGCTGCTCATCTCTAATTTCTGACGATTAATAGTTTGCTTGGGAATTT  
TAAAAATATCAACTTTTTATTCTGGAAAGAACTGAAGGCATTTTATTTTTT  
CTAAATTTCTCTATATCCTGTTCTGCTTGCCTGGACTGAAAAAAAATCAG  
ACAAATACTGCAAGAAAAATAAAATTTTTATTTTGGAAATCATTTCAACTTTT  
GCCCAAGTTCTACAAAAATTATGGGCTCAATCATCTGAGGAAGTGCAACA  
CTAAGGAAATCTGCCAGGGTCAATGTGCTGTGTATCTTACTCATCAATTT  
ACAATTGGACAGAACTTACCTGGAGTGTTCTGCTGACAAGATTACGCC  
TACCCAGTTTTCAAAGTAGACTCTGATGTTAGATTTTTTTTTTTAACTG  
ATTGGTGCTATCCCATCCACCATTTCTAAATTCTTTAAGCCTGAAGGTTT  
CCCAGAATTCTGGAGAGATGATTGGCTTGGGTGAAGGAAAAGAAAAATT  
GCTACCTGAAAATTTCAAGAAAGTGGTCAAGAAATGCTATTGTCTCACA  
TACCGTGAGAAATTATGCATATATTCTGTAACCTTAGACCCACACCCTTGG  
CTCTTTGTAAAAAGTCTGTTAGAGTCTGGAACATTCAGGAAAAGGAAGA  
GAATATAGAATGATTTGGGATGTTGGCTTTTTTAAAAATAAATCCTTCGAGT  
GTCTTCCAAGAGAGAAACAAAATAAACCCAAATTGTCAATTTGATGACATA  
TCCCAAAGGATCACTCAAAAGAGCTGTTAGTGCCTCTCTTCAACTACATC  
CCAAAAGACAGATGTAGACGGTTACCCTTGCCTACAGTTTCAAATCAACA  
GGAAATGGAAAGCACCAAAATAAGGTCTACATCATCTTTTTTACTACTGAG  
GATCTGTGATATAAGAATTCTCCTAGATTAAATCTGCTAACTGGACACCA  
TATGCTAAACCTGGTTTGGATATAACATGTATAGCCCACTTTTGTGAAGC  
CTGTGACATATAAAGAGAAGTATATAAAACATGTATGTATGGCTTAAAGA  
TAAACAAAATGGGCATTTATTACCCATCATGCTGTTTAAATAAAGAAAAC  
ATTACCTTAAAAGCCTCCCAAACCCCTATGTGACCTTCTTAGATTGCAT  
CTTCTTCTATGGTAGACAGAATAATGACCCTACAAAGACATCCATGTCCT  
AACCCTTGCAATCTATGAAAATGTTACCTTACATAGCAAAAAGAGACTTT  
GCAGATGTGATGAAGTTGAGATGCAGAAAGCCTGGACTATCCAAGTGGTC  
ATAGTGGCATCACAGGGTCTGTATAAGAGGTATGCAAGAAGACTAGGAAT  
CGGAGTCAGAAAAAGAAGATGTGATGATGATGTCAGAGGTTTCGAGTGGTC  
CAAAGGATGCAAGCAGCCTCTAGAAGTTAGACGAGGAAGAGACTTCTCTC  
CTGAAGCCTCCAGAAAGAACATAGCCATGCTGACATCTTGATTTTATACT  
TCTCACTTCTAGAACTGCAAAAGAACAACATTTTTTTTGTGGCAAGCCACC  
AAGTTTTTCGGCAATTTGTTATAGCAGCCATCAAAAACCTAATACACCCTCC  
CTTCCCTGGAAGTAACCACTGTCCCTCCCTCTTGATGATAATCATTCAATCG  
CTTGCTTATTTGTTTGGTTTTAAAGTTGTACCACCTATGCTGTGTCTTTA  
ATATGCTAGTAACTTGCAAACCTGAGTAGCGAGCACAACTTTAGCTGTT  
ACAAAGACAGGGTGTGATTGCTCTGTTATGTGAGAACTCCACGAAGAAAA  
TAAACTGAGCAGTAGCTCTGGTTTCAGTTCCCTGAGAATTTACAAAATCT  
TCTGGGGAAATCAGCAGGCAAGTTCATGAGTAAGGCTTGAGTAACCCAAG  
ACTCACCGGGCTGGTGACCTGGTGTGGTTATAGTATGAGTACTAAGTAT  
CTCAATATCTAAATATGAAAATAAAAATGTCCAGTCCCTCTCTAGAGGTT  
TGGTTTTTCCTGTAGAATCTCTCACCTATCATGCCGTGTTTACCCTTTGG

GCCTTCTGTCCCGTATTAGAGACTTTTTTTCAGATGTCTGTTGATTCTTGG  
CTGTCTGCTTTGTGAAGAGTGGTGGAGATTAAAACCCCTATTATATTAGA  
ATCATGCTGATGAGGTTACTGGTAGTATTGCTGAAGAATGTTCTAGGTGG  
ACATGGTTTGGGATCCCTTGGTGTCTGTATCCTAAGAGAATACTGACCAG  
ATCCCCAAGAAAAACGTTCTTTTCAGTTTCCTGCCTGGGGATTCAAGGTCA  
GGCTGCCAGTATGTTTGGAACTGAACAGGAGAAGAAGGCTGGGGGTGGGG  
AGGCACCTGTTTTCAAGACTCTCTATGAAGGTTCTTTAATTCCCCCTCTTT  
GCATTTCATTACAGCATCTGTGTTCTCACCCCTTACCTGGCATCCCCAACG  
CATAGACCTTCTAATTCATACTCACCCAGGATAAATCTATAAATACTTGA  
AAGTGTAGCAAAACCATTGCTCACAATGTTAGAATGAGTGTGTAAGGATC  
AAAGTGCTTCTCATTCAATTAGCTTCTCAGTCCTGATCTTAACCAATCTT  
CCTTCTTCCCCAGTTCCAGGGGCACTAGGTATCACTTTCAGAGCTTTTCA  
GAAAGTCTGATAAAACATATGTGTATCATATTTCCCTAGTAGGCTATCA  
GTTCAACAATGGAAGAGCTTGTTTTGTTGGTTGATATACTCCCAGGACAT  
AGAACATAAGAGGTGCCAAAAATATTTGTTAACTTGGGATTTAACTTTTCG  
TGGGTCAGTTAAGTCAATTACCACTGGCCCATCCCCCTTATCAGCTCTCAA  
CATTGTACTGCTTTGGTCCCTCTCCAGTTTTTCCACATCTTTGAGGTGTAC  
ATATTTTTTTTCTCATTGCTTTATTGTAATTTTTTCTTGGGATTTTTTGAGA  
GAAAGGAAAATCAATGTGTCTGTTGAATCTACCACATATGGATGCAGGTG  
TGCATGTGCGCATGCGTGTGTGTGTGTGCATGTGCATGGTGAATTGGTA  
TTTAAATTTTTAAATATAAGGATACAGTTAAATGTTGTAAATAAAAATC  
CAGATATGTGGCTTCTCTTGACAAATAGAAAACCTTAGCTGACATTAGGCT  
CATGACCATAGTTAGTTGTATCTGATTGGCAACTGCCTTTTTTAAAAAAGG  
AGCATTGACTCTTTAATTAATAAGTGTTCACCACTCCTCAGTGTCTGA  
CACCTACAGTATTTCAATTCCTTCATTCCCTCATACTTGATTGGCCTCTAT  
AGCCCCAGTAGTCAAAGAAAAATAAATTATGGCAGCTGGTGGCAGGGATAA  
CAACTGTGCTAGGGATGGTCTTGGTGGCTTTGAATCAAGCAAATTGTTAT  
ATTTCTGTATGAAAAATATTTTCGGGGGCCATTGGAGACACTGTAGCCATT  
AAAAATTTATGAAATCAAAGCAGCCTTACTTTACTCTTTACAGAAGTAGT  
AGACCTTCTACATAAATCCTACAGATCAAAAGCTAAGTGCAAGCAATGAT  
CATGCATGAATTATGCAAAAAAACCAATGCTCCCTAACTTTTGCATCATG  
AGGATATCCAAGCATGATTACTTTTCCATTTCTCACCTCATAGTCTTCTA  
ATTCATACCCTTCATGACGCCACACGTTGCCTTATACTAAAACATATATG  
TATCATATTTTCCATAGTAGGCTATCAGTTCAACAATGGAAGAGCTTCTG  
TTTTGTTGGTTGATATACTCCCAGGACATAGAACATAAGAGGTGCCAAAA  
TATTTGTTAAATGTATGAATGCATGTAAAATTATTTTTTTTAAATGAATAT  
GATTAATACTCTAGGCCAGAACTTCCTAAAATGTTTCTTTGGAAGATTAT  
TTCCATGTAACATTACTATTTTTGTACAAAGAGCATTGATTGGTGATCA  
TCACAAATTTGGAGAATGTTTGATTGGACAAAGCTAAGTGGGGTTCTTTA  
CCACAGGACTTCCTGAGCCTTCAGGACTGTCTGAGCCTTCATTAATTTCT  
TCATTTATCAACAATATTTTCATATGTCTACCACTTGCTCCTCACAATGC  
TACATGCTCTAATGAAAAACAATATCTACACTTATACTGCTATTGTGAAC  
CCTAAATCTAGCAATATGCAACAAGAGGGAGAATCAATGGACTGTTTT  
CCTTCTAATTTATTTCGAATAATAAATCCCTTTCTGAGGAGCATCTCATGG  
TACTAGTATTTTCATGGAACACCTTTTGGGAAACCCAGGTCTTGCCATAAA  
AATAACTATTTTAATTCAAAATCTAGTTGGGAATTTTTATGTGCAATTAG  
TTCCAGGCCTCGTAGTAAATGGGGACTAATAGATTATAAATAGTTCCAGA  
TAGGGTACTCCAAACCCAATCAAACCTTTCCCAACTCCATTTAAGAAAAAG  
TGGTGGAAAAACCTAGCTCCCACTGGAGATATAAATCAAATCCAAGGGGGG  
AACTAATGACTTCACCTTACCATTCAACTTTTTGAAGCCAATCTCAGGAGGT  
GAAAAGCATTATAATCAATACTGAATATCGCACAAATCAGGACCTAGATAC  
TTAGTGGTGTCTACAGGAAGTGGATATTTTTTGAAAGTTGTAATGATGTG  
CTGAAGATGCTGCTGTGCCTTCCCAGTGAGTAGCATTTTATGGCAAGACC  
CATCATGACAGATGTTTTTCACATACCAACCAATTTGAATTGCCCAATCT  
CAAATACCTCAAACCTCACAGAGTATATTTTTGAAAAAGGCCAAATTCTAT  
TAATTAACCTTTTATCTCTCTCTTGCTCGTTTTTCTCTCTCACACACACA  
CTTGCCCTTTAAAAAAGAGCAATAAAATTTTCAGTAAACCT  
CAGGAATCTAATGTTTATTTTAAATTAGCAATAAGCTTTTGAACAGGAAAA

CACACGAGGTATACTATATTACCATACTGGACTCTGTTTCCTACAAGATAA  
ATGTTAAAATTGTCATTTATGATTTTTGTTACTTTTATAATTTCTTTGTT  
TTTTTTTTTTGTTTTTTTGTGTTTTTTTTTTCAAATTGCAGTCTCAAAT  
TGAAATTAAGCTGTAGATATAAGGACACTTTAAGGGTTTTGGGCCCTATT  
TGTAATGTGACATAAAGATTCCCTAATTAAGCAGGGTGATATTACTACATA  
CGTTTTTGATTATGACCCCAAAATATATCAAAAAAGCTTCAGGAGCTCTA  
CTAATAAGATTTTAATAATAACTAACAGAATGAAGGAGTGAAAGAGTGCA  
CAAAGTGGGAAACACTGAGTTCCTGCCCTAGAAGGATTTACATTTTAATT  
TAAATAAGACAGAGCAAACAAACATAAATAATTAACCATAGTAAGCCACA  
TTTATACTTAGCATGGGTGGAGAAAGCGAAAGACGGAACGGGTGCTT  
TGCTTTAATTACTTATTTCTGTATATTCAGTTTTAGAAAGTGAAATGAAT  
CATTATTTTAAATGGAAACCATAGAATTGAGAATTAAAGCAACTCAAGAG  
TTATTGCAGGACTTACAAAGAATAATAGTAATGACATTAAGAAATAATGG  
ACATTTCCCTGACTGCCTACTGTGTGTCAAAGGGCTCATATTCACCTTCTG  
CTAATCTTGACAATGGTCCGAAAGGTAGCTGTTTTTATTGCTACCTTATT  
AATGGGCAAAATAAGACTCCATGGTATTTAGGTAAGTTGCTCAATATTTA  
ATTCAGTACAGAACATGGAACGAAGCTCAGTCTAACCTCAGAGTCTTGGC  
TCTTTCTACCATGCCAATTCCTCCTAGGAAGTGGCTGTAGCCAAATCTT  
TGCCATATCCAGTTTAATGGCACTTTACTGAAACCCCAACACCAGCTGCG  
AAGTTTTATGCTAGGAGAACAAGGGCCACGGCCTGCTTGCTATCTCTAGG  
TTAGAACTTTATCTGAAAATCATTAGCAAGGTGCTAACCTGGCATGGA  
GACCAACCTCCTTTGGTATGAAGAGGAAGCTTTTAAACACACACACACA  
CACACACACACACACACACACAAAACCTAAACATTTGAGCATAGTTA  
GAAATAACACCCCATCTCTAAGGAGACTGCTGCCAACCTCTACTCCAGAG  
CAGGGTCCAGGTGCCAAGAAGCCAGCGCCTGATCATGACAATGTTATTTT  
CCTGCATAGCTGTGCGGGCCTGACAGGATCATCCTGTACGTGACAAGTC  
ACCGGCCCTGACTTGCCTGGGAATCAGTTGCTGGGGTTCCCTGACCAGCCT  
GGACAGGTTGAGCCAGGGAGGTGGATGCAGAAGCAATTTAAACACACATA  
CACTCACGTGCATGTGCTGCAGTGCACACACAAGCACACACACACACA  
CACCACACTACCACCAACCTACTCAAACACCTGTAACCTCATTGCAATT  
AATAAATTAATTTAAATGTTCTCGTGGGAAAATGCCTTAGTGAAACCATG  
GGTTTACTATAATGAAACCCAGCATCAAGAGCTGTGCTATAATAATACCA  
ATCATACCAGGAAGTGAGGCTATTGGTTGGTCTTTTACTTAGGGAGAGGG  
GAATGATACTTTTAACTGCTCTGTTTCCCCCTCCCTCTTTACACTTTTTG  
GTTGACTAATGTCTGCTGAGGATATGGCCTAAACTTAATTAAGGAAAGG  
GAGAGAGAGAGAGAGAGAGAGTCCAATAGCAAAAGCTGTCTTAATTACAA  
CAGACCTGTACTGGCTATTTTCCCCCTTAGAATGAAAGCTGAAGCCAAAG  
TGCCCGCTAAAAGGCATAGGGTTGGAGGAATTTTTTTTTTTTTTAAAGAAA  
GTAAGAAGTATTGGGAATGTTAAATGATACACATAATTATGTATTTTTGA  
ACTTAAAAATTATCTGCACCAATTACCATGATGGGGTCAGTGAGTAGAAA  
GTGAGTATATCTTCTCTCAGCTTTCATTGAGTCCACCAATCTGTTATT  
ACACACCTATGATTGTGTCAATTATGATGCGCACAACTGTCTGTCAAGAT  
ACAATTTAAGACCATGTTTGCGTGTCTCATTGCTACTACCAGATGTCGTT  
ATTGTATAACCACACCATTAGTTCATGTCTTATTGTTTTGCTCATTCAAT  
CATTCATTCAATTGGCAAACACTCCACTTCCTACCATTTGTCCGTGGTCTT  
TCTCCTCAAGGAGTTACAGCCTCAGGCCGGGTCTGTCCCTGCACTACTAA  
TACCCTAGGCTGGATCCATTTTGTGTTTTGGAGGGTGGGAGCTGTCCGTG  
CTTTGCAGGGTGTGTACAGCATCCCTGGCTTCTACCTACTGAATGTCAC  
TAGTGCCCCCTCCCCTGCATCAGGATATTCAATAATCTGTCCCTAGAGGT  
CAGGTGTCCCCTAGAGGGGTGAGAACCTCCCCTAGATGGGAACACTGGTC  
TTAGGGTCTTGGTATCTCTTTGTAAATCCTTGAAGGTTCCCTCTCTGTGTT  
CCTTCCCCTAGTCTCTAATCATAAAAACCTGCATCTGTCCATGGGAAA  
GAAAATGAGTCCTCCAAGCTGGTGTGTCTTCATTTACGTATTATTAGTA  
CCTTACTGAGATGATCGGCCATTGTTCCCTGCGTTGCTGTGTGTGTTGG  
ATGCCAGGCTGTAGGTTTAGGAACCTTAAAGCCTCCCATGACAAGAAGAC  
AGTTTGAAGAGAGAGAATGAAAGATGAGTCCAAAGGCAGGATGGGAGAGT  
AAAGAGAGTGGGAGACTTGAGCTTTGATTGGAGCCTGTCCACTTAGCTAG  
TGGTATAGGTGAGCTTTCTAAGTTTTAGTTTTCTGTGGTACAAAATAAGG

ACCATATCGCCTATGATTGCAGGACTGTTGTGAGTGAGGGTTATCTAATG  
CAATAATGTGATAGAAAACGGAGCATTCCATTAAAGCTTTGTCCCCTTCC  
CCACAGTTAACACAAGATGAAGAAAGACACCAAATTTTGTGTTTTGAAA  
ATTATGTTGGATGCTTCTGAGTTTTCTTACCTAGACATTTGTAAGATGTG  
GGGATGCACTTGCTCATGTAGGTTTTACCAGAGACTCAAGTTCTATCTC  
TGAAAAAGGTGAATGATGGTATCTTGTGATCAGGGGCAGTGAATCAGAG  
CTGACTTGCCCGGCATTTCTCAATCGAGCAGGTGCCTGGTGGAGCCATGG  
CGTCAGGAAGCAGTTCACTGGGCGGTCTGCGGCTTCAGGTCTCCTGACTG  
TTCCATCTAACTGGAATGGAACCTTCTTGGGACTCAGGGCTTAAGTATTT  
GGTGCTTCTCCTCTGCTGGAAATAGGTTGATGCACAACTCTTTCATGAT  
GCCAACACTTCTCTTCTCTTAAGGAGTCCAAATTGCCTCAAGTTGGAGT  
CGAGGCATCATCAACAAAGTATCCTCAATGTGTCTCTGAAATGCAGTCTT  
TTTGAAATCATAAATGACTTCCATGGAAGTGTGAAATTAGCTGAGCAAAA  
AACTGAAAAGTTGGAATCTCACCGCATGGAAAGATCCTTGTAATGCAGAA  
CAAAAAGAACTGTCATCTGGCCTCCAACCTAGAATTCTGTCTCTTATAGAAA  
CACAAATGATTGCTTTGTTGGAAAACAGGGTATTTGTCCCCAATGATAAGA  
ACCTCTAAGTTTATTAGATGCCCTCTGAACATTTTTTAACATTTTGTGTTG  
TAGTAGTTTTTAGCCTTAGAAAATAGTCTGGCTTCATGCACTTGATTTCTCC  
TACGTATTTTCCATTGGATCCATTCTCAACATTTACCCTTTTTGCCTTAT  
CTCATTGCACCTTATTTTTACTGTAGTCTGTACCATAGAATGAAGACAAG  
AGCATAGGAGGGGGCAGTGTAAGAATAAAAAAGCTAACAGTCTTCTCA  
CCAACTCCTGGAAATAAGAATTTAAACGCTTTGGAAACATTATCTCATTT  
CCAGTGAGCCCTTGAACAGCACTGGTTTGAACAACGTGGGTCCACTTACA  
TGCAGACTTTTTTATTTCTAATAAATACAGTACAGCACTGTAGGTATATTT  
TTTCTTCCTTATGATTTTCTTAATAACATTTTCTCTCCTCTTGCTGACTT  
GATTGTAAGAACACAATATATCATGCATATAACATACAGAATACGTGTTA  
ATTGACTGTTTATGTTATTGGTAAAGCTTCTGGTTGGCAGTAGGCTGTTA  
GTTAAGTTTTTTGGGGAGTCAAAATTTATACGGGAATTTTTGACCATGCGA  
AGGGTCAGCGCCCTCACTCCCTGCATTGTTCAAAGGTCTACTGCAATGA  
TTTTAGTAATAACCTGGGAAGGGAAATATTGGTATCCCTCTTGCTTTAAG  
AGAAAACCTGAGGTTCAAGGAAATGAACTGACCCAAAGGAGCAGACACTTG  
AGTGATAGAGCTGACACTCGAAATCAAAAAATAAAACCCACGTGCTTTGC  
ATTCTACTACATTGCCTACTAGATGTGTCTCTAACACACCCCTGTCTCTCC  
CCCGTTCAGGTAGATCCCCATCAAACCTAGAAATTGAGCCACCCATGTGGG  
GTTTCCAGCTCACCTCCTGGAGAGTGAACCCTCTCAGATTTCTGATACCA  
GGCATTCAAGAGTCAAGGCTGCTTTCCATGCTCACTTCAAGTCTTACTCTT  
TTTTTTTTTTTTCCAAGTTTTGTCTTGATGTGACAGGACTTGGGAATGC  
TTTGCCATTTTCTTTATTTCTCCAGCAAGCTGGGCCGCGTCTACACTGG  
ATGCGGCCGCAAAGGAGTTTACATTGTTCAAGGCTTACTGAAGAGCAGGC  
CTGTGTGGGGTGTCTCTTTTCCAACTCACAAAAGCCTGGGAGATTGGGT  
ATCCTCATTATGCCAACGAGGAAGCTGAAGACTGGACAGGAGACCAGCAG  
ATCCCAGTCACTTGCCCAAGGTCCCACAGCAGAGCTGGAAGTCAAATCCA  
AGCTGCTCTCTGACAGCTCCTGTGCACCAGATGGCTCTAAACCACCCAGA  
GAATTGACTCAGGAGGTGCTGACTGGGCTGGGCTGCAGATGTATTATTTT  
CTTCCATCTACCCAGCTCTGGATTCAATTTGCACTAAGATGGAGCATCAG  
GGCCAACAAAACACCCCTGAGCTCAGCACCCTGTTGTTTACTCAAGTATA  
TAAGTGCTCAGGGCAATCTTTTGCTGGGGGCAGGTCTCTCAGCTCAGAT  
AAGGGAATGGTTACAGGAAAAAAAACAGAGCTGCCAGTTCTCAAGGA  
GAGCCCAAACCTTTGGCTGTGGCATCCCTTGATGTTTATGTGAATTTAGAG  
CACCCGGGTTTTTAATTTGACACTATCTTTGGGAAATCTAATTAGCAAGTC  
ATGGGGTTTCCGTCTGCTGATCCTCTCAGATAGCAATTGTGTATGCCATA  
AACACCAGCCAGAAGTCAGCAGCAAGGAGCCTGGGGAGGGTACGGGCAGG  
TCCTCGGGCAAGAGTGCTGACTCAATCCAGATGAGTCAGGTACGCAGGTA  
GAGGACACACCGCCGAGCTCCCTCCTGCTCACAGGTCTGCAGGCCAAG  
CCTGGGGAGGACCCAGGCAGGACAGAGAACCAGCCCTGTTAGGGTCGAGT  
TAGTATAAAATGAGCTGCATTGTCAATTTTTACCAAAGATCTTGAGGGGCT  
GAGATAGAAATAAGAGAATTTTCTTCTGTAGTGAAGTCCGACTTAAATC  
TCCACACTCAGCAGTTATCTTGTGATTGTTTTGAATATGGCATCAACATA

ATTTTTTTATTTTTATTTATTTACTTATTTTAAATATATTTTTTTAATGC  
GCCACTTTGGAACAATAGAGCAGGCTTTGAGTCAGGTAACTGAGGTATG  
AACTTAGTCGCACCACTTTCTGGGTACGTAAATGAAGTAGCATCCATGA  
ATCTCCAAGTTCCTCATCTAAATAAGTGGGATTGAAAAGAATCTTCCTGG  
GGCACCTGGGTGGCTCATTGGTTGAGCATTTGCATTTGGCTCTAGTCTAG  
ATCCTGGGGTCTGGGAACCACTCCACATCAGGCTCCCTGCATGGAGCC  
TGCTTCTCCCTCTGTCTGTGTCTCTGCATCTCTCTCTGTGTCTCTCATGA  
ATAAATAGATAAAATCTTTTAAAAAAGAAAGAAAAAAGAAAAGAAAAGA  
AAAGAAAGAAAAAAGAAAGAAAGAAAGAAAGAAAGAAAGAAAGAAAGAA  
AAGAAAGAAAGAAAGAAAGAAAGAAAGAAAGAAAGAAAGAAAGAAAGAA  
AAAGAAAGAAAGAAAGAAAGAAAGAAAGAAAGAAAGTATCTTCCTCTCTGG  
AGGATTCCAGCTCTAAGCTCATCTGATGGCACATAGGATTTTCACTATCA  
TTGTTTATTAAGTGGACAACCTTAATAGTTGGACCTTAATAGTTGGATAGT  
GGACCACTGCTAATGGTAATATTGGCCACTATCATTGTGTTTTATCTCTAT  
TCTGTAACAGATGCTTGACACACATCATTGTTTTATTTCTCACAAAAAATC  
CTATGCTTGAAGAAATGGTCAAATTTGTGGGTTTTTTTTTTTTTTCTTTT  
TCAGCAAGATTCTGAGAACATTTTAAATTCTAATGTCCTAAGGGGAATG  
CAGGATCTAAGAGGGAATCACATACCTATGCCTGAATGTGAGATAGTTTT  
ATCGACAAAACCGTCAGTCAAAAAAGAAAAAAAAAGACTTACCTTAACTT  
TCAATCTTTATAAAGTCTCTCCTGTTAGAAGATACTCTATTAGTTACTTC  
ATGTTAAATGCAGTCAGTAGTTTAGAAAGACTTATTAACCTGTAAGCAA  
ATCAATCACTATTTGTATTTAATTCATATAGGATGACTTGAGAGAATAAG  
GGGAGAAAAGTTAAAAATAATGTCTCTGTAAATTAGGCCTTTACAGATCA  
CTTTATTTTTATTTATTTTTTCTATGATAGTCACACACAGAGAGAGAGAG  
GGGGGGGCAGAGACACAGGCAGAGGGAGAATCAGGCTCCATGCACCGGGA  
GCCCAACGTGGGATTTGATCCCAGGTCTCCAGGATCACACCCTGGGCCAA  
AGGCAGGCGCCAAACCACTGCGCCACCCAGGGATCCCCCTATAGATCACTT  
TAAAACTAAGTCTGCTATGTTGATCACAAATATATGCCCTACAGTTCAA  
AGTGAACCAAATCATCTTTATATGATCCAAATGGAGATACACAGTTTCCA  
GTAACAACATAAATGAGTCAAAAACTTAGAAAGAGGTAAAAGTCCTGTG  
ATTTGGAAAAAAAAAAGTGATAAATGTCTCCAAAAATTTTTTGAAAG  
AAAAATCCTATTGTTGAAGGTTTGAAGAAAATGGTTTTATGAAATATG  
AGTGGAAAATCAGTTATTTCTAAATTAACCTCATTTAATATAATATGGGG  
TTCTAAACATATTACTAATCAATGACTTCAAAAGTTATCTTTCTCCCAA  
AAAAAACTTTTTAAAGAATACTTATTAACCTATTTTGAAGACGCATGG  
ATACTGAATAGTATTTGCTGAAAGCAAGCTGCTGTGCTAGCTGTACTTAT  
GGATATAAACATTAATCAGATACCAGTGCTAACTTCAAGGAACCTACAGA  
ATGGTAGGAAAGATATGCAATATTTTTAAATAGCCATTATATCTGATAA  
GAAGTGACAAAGCCAAAGGAGAAGTTATAAGTGAGCTATTTTAGGAATTC  
ACTGAGATTTCAAATAAACCACAAGTATGAGGTCTAATGGGTACTTTTC  
TGTGTGTTTATTTTTTGTCTTTTGTCTGTTTCTTTGGTTGTTTGAGGTT  
TGAGGTTTAGTGAAGAGAGTAAGTAGGGGTGACTCGAAACATATCCATGT  
CACATTGACTATGTCAAAGACGTCCACTGAAGTGGATTGCGGTTTAAATG  
TATAACTGTAGCCGTCCCAAATCCCCCAAATCAAGTTATGGTGGCCAATT  
TCATATCTGTCATCCTTTCAAGGGTGTGAGAGTCTTCTGACGTTCCTTTA  
TTATTCTCAAATACTGTTTAAAAAATTGTATTATATAGAAGAAATGTGGG  
TGTCATCCCTCACAGCCAGGAAGTATAGAGGTGATTCTGAAAGGATAGAATA  
TTTAGGTCCATAAGAAAGTTATCCGTATCTTTGTGCCTTCAAAACTTA  
CTTCTGTACCTCTGTCCCTCTATTTTGTATCTCAGCATCATAAGAAGTA  
GTGTACGGGTAATAGATTATAGCCCCTGCCTCAGGAAAAGAATCTCGCCC  
TCAGCAGCTTTGGAAGGGCCACTGGACCATCTCAACATCCTTGAGACTC  
AGAAATTCCATTTATTAGTGCTTCTGCTTCCTCTTTTGACCCATTATGGT  
GATCAACTTTTGTGTTTCTTCAACCGAATTAAGCTTTATTTACTTATTTT  
TTTAAATAAATCTTGCTTGTTTCATGTAAATACTTCCCTCTGAGGCATTC  
CAGAACATGCATATGCACAGAGATATTTTAAGCATCCTATCTAAGGAAGT  
TCTAGAACATGGGGGCAACTGAGTTAGAAGTAAGCATATCTTACTGTTTT  
CTGCCGTGTAAGTTTTGTAAAGGATCATAAAAACTATCCCCTGTGATGGT  
GCCTGGAGGGCTCAGTCAGTTGGGTGTCTGACTCTTTGATTTTGGCTCAG

GTTGTGATCTCAGGGTCGTGAGATGGAGCCCCACGTCGGGCTCCACATTC  
AGCAGGGAGTCTTCCTGTGGTCTTCTCTCTCCCTTTCCCTCTGCCCCCTCC  
CCATGCTCGTGTGCATGTGTCTTTCTCTCTCCAACTAAACAGCTAAAA  
AAAAAAAAAAAAAAAAAACTCAAATTAAAAAAAAAAAAAAGCAAAAAACA  
AACCCCCAAATAACCAAATAACTATCACCTGGGTCTAGGTGGCTCTAGGT  
AAGGGAATTGATATTGAAATAATTAAATATTCTCGGAAAACAACAAAGA  
GACAATTAGCACTAGTAGGTAAGCCCTTTACACTTTTTATCGTAGTGATG  
ATGGCTTTGCTCAGAGAAAAGAAAAATCCAATGAATACGTGAGCTGGTAT  
ATAGTTCTAAATTCATGTCTACACAATGCATGGATGCAGGATCACCTGGA  
TGGCTCAGTGGTTGAGCGTCTGCCTTTAGCTCAGGTTGTGATCCCAGGGT  
CCTGGAATCGAGTCCTGCATCAGGCTCCCTGCAGGGAGCCTGCCTCTCCC  
TCTGCCTATGTCTCTGCCTCTCTGTGTCTCTCATAAATAAATAACAA  
AATATATATTTTTTAAAAACAGAAAAAGTCAGTTTATTCCCTAATGTCCAG  
ATTGAAATAACTGGTTTGAATTTTTTTTTTCACTACCAGCTAACCAGTTGT  
AGTAACAGAGGCACTGTCTGGAGTCCTAATGGCTATATCAAGCTTCTTTG  
CTCTTCACCTACAGCTAACCTCAGATAGGGTTTTCACTTCTCTTGGCTG  
TGAACCTCATGATGAATCAAGGCATAATGCATCTGCAATTGTCTTTTT  
TTTTTTTTTAAAGCATTATAATTTTCATTGGATGCAAAGAGATGTATTTT  
TTTTCTCTCAAGCAAATGTATGACATCTGGCCACTTTCCCCCGTTGAAAA  
GGCCTTCTGCTATGGCTGGGCCATGATCGCACAGTTGTTAAACAGCAGGG  
ATTATCAGGCAGGACAGTATTAAGTGGTATTTAACAGCAAGACCAAAGTT  
CTCTGTCAAATGCCTGACTTAGGCCTTCTTGACTGTTAGCATCGAAGCCC  
CGAGACCTTTTGCACGGGACCATTTTTCATTCTGACAACAAACCACTGTG  
GCTATCCAGGTTGCTTTGCTGGAGCTGACAGCCAAGTATTTCTGTGGCAG  
AAATATTGCCACAGAGTAGGGGATCAGGGGTAGAGGGGAGACATTTTTAT  
CTCCTTTCACTCCAAGTGCAATGGCATTCCGAGCAGTAGGTGTCCCAAGT  
CAATGACTGGTTAATCTATTCAGTATGATCCCTTGCTAGTCATAACAAT  
AGGGGGGTAGAGGGCAGGGGAGTGTGGAATATCGGCCTCACAATGTGATT  
GTCTAAAGTGACATTACCTTCTCCATCTTTTCCAGGCACATTCTCATTG  
ACATAGGCTGGGGAGGGTGACCACTGAGACTGTCAATTTAAGTGCCATTC  
TCTAAAAGTTTTTTATTGGGGGCGGGGAAGGGGGAGAGGGAGAGGTGTT  
TGACAGGTCCTTAAAGTTCAAGCCCAGCCATTTTATGACCACAGTAAGAC  
ATCAGTTATGGAACCTATGATATGATGGGTGCAAAGGCAGGAAATAAAAG  
AAAGAACCTTAATGAAAGTTTAATCTTCTGGGGAATTTGTCCCCCTCAGAG  
GCATAAATCGAGTGACCTAAACTAAATTTCCCTGTCAAAGGCTGGCATT  
GAGTTCATGCACATTTTACAGCTATTCTAGAAAGAAATATATATTTTTTA  
AAATAACTATTTTCTATTCTTAAGTGAGTACCTGCCATTGCTGATGGAGG  
CTGGGAAGTGCTCACAGTAGATTTATTAGAGAGGTTATTGCTTCTCTATA  
CAGCGTGCAATTATAGCAGTTATATGAGCGTAGTTCCCCGAACAGTTGCCT  
GATCCAGTTTTTAGCTATAAATACATCTGGTATTTGATTGGCCGAGAAGT  
TGAAAAAATCTTTGGGAACCATTCATTGGGCTGCTCTCTTTTGGATCCG  
GGATGCTAAGTCCATATCAAGAATGCTAACCCTGGTTCATGGGTGAGATG  
TGGCTCACAAATCCCTGTTACATGTGAGGCTTCATATAGATTGACCTGGGG  
TCATGTGGCCAACCCTGGACTGACTTTCCAGGTCTCCAGAAATGAAAAAG  
AGTATTTTTGGCCGGAGGAGTAAGTGAAGAGAACGACGAAGATGTGAAGA  
AGGGTCATGTTGGGTAAAGAAGATGCTCCCTAAGAGATGCCATGGTGCCCA  
TCTCCTTTTCCCTGGCAATAGCTGTGCTCTATGTAGTCAGGAAGCCCCGCC  
AGCTTCAGCTTTTATTGCATGTCCCCCATCAAACCCAACACATTGAGTCC  
TCGATCAGAGATGACATTGGGAAACCTTACACTTTGTGGGTAGACCTCTT  
CCAATTGATTAGTTCACCTCTAGTAATGAGTCATGAGCACATATCTTCTTC  
ATACACATGCTGAGTCTTGGTACCTGTGTCTGGGACATACAACATATTTG  
TAGGAAAAGATATTACTATACTGTGAGAGAGCCAAACACAATCTCTGATGT  
ATGCAATAAAGACAAAATAACATCAACATTTAATCGTTGGGAGAATGGCA  
GTAATACTTGCTTTTCAGAATGAGTACAAATGATCAGATCTCCAAAGGAGG  
GGCATCTGGGAGGCTCAACTCAGGTCATGGTCTCTGGGTCCTGGGGTCCC  
AGGGTCCTGGGATCAAGCCCTGAATTGGGCTCCCTGCCCAGCAGGGAATC  
TGCTTCTCCCTCTTCTCTGTCCATTCCCTCTCTGCTTGTATGCTCTCTCA  
TGTGCCCTCTCAAATAATTAAAATTTAAGAAAATAAAAATAAAATAAATCT

CCAAAGGAAAGGACATTCTTTATTTCAGGTCTTTCACCTATAAGGGATTAG  
TTATGTTTTTAATGAAAGAGAAGCTAAAGGAAACATCTAACAGATTATTGT  
TTTTCAAAGCTCAGTTTGGAGCCAGTATAAAGGTAATAAATGCACACA  
TACCAAAAAAAAAAAAAAAAAAAAAAAAAAAAAAAAAAGGAAAGTT  
TGCAACATCAGCTTAATTACTTGTGATTACAAAATAGTCTGATTGAGGCT  
TGAGGCTTCTGAATCTTTCTATGAATCATTTTATCACTAGAGAAGAGTGT  
AGACTCTGGGGTCAGGTCTTTGTTTTACTGTTTATAGGCAACTTTATTAA  
ATTATCAATTATTGAGTGAGATCATGCTTTTCAGGGGTGGCATATAGTAA  
CTATTAAATAAATGTAAGCTCTTATCATCATCAGTAGCCATAGCAAAGGT  
AGCAACAATTATTGGCATGTGAAAATGGAAGAAGTTACAAATGAGAAAAA  
AAAAAAAAAGGACAGTAACAAATATTTACAGTTAATTTTTTTCTACAGCAC  
ACTAAATGTTTTCTTAACTTGCAGAACTTCTGGTTGATTGTGACATTGAG  
CAAGTGTCTTCAGTTGTTTCCATTTGCTCATTCAATTAAAAATGGTCTCA  
TCTTCCAAGTATTTGAAGCCCTATGAATTCAGCTTCCAAACTGGATTTT  
CAGCCTTCCTAACACTCCAGTGTGTATGGAGAGATGCACTAGCGCTCATT  
TTAGCCAAGTGCCACATTTGGTCAAAGCCAAGATAGAAGCCAACTTAAA  
GATCACTTCTGGGATATGAAGATACATATGACATTTTCTTAGAAATTCCC  
CTTCGTTTCCCATTTTATTATTAAAAATTATAATTGCCAAATGTGTGTGT  
TACATTATACTGTGGGAACAATTATTTCTTGGGATTCTCAATTCCTAGAT  
CTTAAAAATATTTTTTTTAAAGATTATATTTATTTGAGAGAGGGCAAGAGAG  
AGGGGTGGGGAGCGCACAAAGAGGTGGGAGGGGCAGAAGGAGAAGGAGAAG  
ACTGCACCTTAGCTCTGAGCCTGATGCGGGGCTTGATCTCATGACGCTAAG  
ATTATGACCGGAGTGGAATCAAGAGTCAGATACTTAGCTGACTGAGCCA  
CCCAGGCACAGCTTAAATTTTTTTGAACACGTTTGCAATTACAAATGCA  
TTCTTCTTTTCAAGGGATACATTTAAATATTGGTAACTTTTTTTTTTTTT  
TGATAACCCAAAATATAATACAGGTCTTTAGTATCATGTTTTCTTGAAGA  
ACCTTTGTTCTTAGGATTTATAGCTTATATAAATATCAAAAACCTCTTTCT  
CTTCAACTAAGGAAAATAGTTGACAGTCTATAAATAATATTTCAACTTTT  
TTTTTTGTTTAACAATTTAACCACTTAAGATTCAAACTACACAGCATTG  
TCTTCTTAAATTATTCTTATAAACTCTGTGATTTCTACAGTTTGAGTAAA  
TAGTTAAAGCAAACCTGTGGGTACCTCTTTTTTCTCTAATATTTCTTCC  
TTTTTCACATTCTTTGTATTCTTAACTGTATCTGGATGAAAAATGATTTA  
TTATTGATATTGAACATGGCTTTTTGTTATTTTTTGCCTTTTTTCCCATC  
TTTGTGTTTGTGTTTGGACTTTAGTTTCTCCTTGCAATTAAATTTTTAAGGG  
GAAAAGTTGGCTTTTTTTAGTTTTCTCACAAGATTTCAAGAAATGCCAC  
ATGGTAACTTTTCTACAAAAAAATTTATGGCCTAACTTAGTTAATCCAC  
TGTAAGTTAACTGCATGTTAAAGGATATTTTGTGTTGATGTTAGGAATGCT  
AATATAAGATAGAATTCCTAGTACTTTGCCCTGAATTATTTAACTTTTTT  
GCATTATTTAATTTTTATTTTATGAACATTTGATAATACCATAAGACAA  
TAATGTTGTTTTATTACATTTTCTAGTTAACTATTTTTCTTAATATTTCT  
ATTAAATAATAGTTTATTATTTGTATGTTTATAGATTATTTTTTCAACTA  
GTAGAAAGTGTTAATTGCTTTTGGACATTATATTAATAGCTATCACAAATC  
ATTAAGCAATATAACCACTTTGTCATAATAATAAATATATGTTATACTAAA  
GCTGACTAATTGAATTTCTACCTATAAAATACTTGAAGAGATTTTATTTT  
AATTTACATCTAGAATGAATCTCCAGTTTCTTGATTCTGAAATTAGGAT  
GATTTCTACCTCTAACACCCCCCTAACTACTACCTCTACCATCCCCCT  
AACCTCCTAACTCTACTACCAGGGAAATTCGGCAATGTTTGAGACATTT  
TTGGTTGTTACAACCTGGGGAGGGGCTAGAACTGAATTCTCCAGTTAAT  
CTTACTATAATAGGACACTTCATCAGCTAGCCAGTAGTTCCCAACCAGT  
CATGATGCTTCTCACCCTCGAACCCAGAAATGTTTTAAATATCAGTG  
ACTGGTTGTTGAAATAACTAGAGAAGGGAAACATGGCCTGTGGTGGGCAG  
GGGACAGGGTTTTTCGTCTGTCTGTAATGTATGTCATAGTCACATGCAAC  
AAAGTGTGGTCTTACCCAGAATAGCAATAATGTGTTAATGGAGAAACACT  
GGTCTAATCAACAGATCAACAGGTGTGCTACTGCCAATTACACATCTGTA  
GTCCAGTCAGTGTAGCTCTGTTTCCAGGATGAAGACGGTCTTGTGTTTACCC  
TTGTACTTAGGACTCCCTTGTGCTCAGGGACAATGGTTAGAACAATTCTC  
CACGGAAGGGTCTGTGGATATGTAAGACGTTTTTGGCATAACATAGCATAG  
TGACACAGGTAGCACTGAAGTCCAGACTTCATCAATAAACCTTTTCATGAA

AATTTTAAGCTTTTTTCAAAATTTTAGGCATCTGCTATATTAGGCATCAAA  
TCAAAGTTTTTGTAGATATCTGTTTCATTGTGATTTACTATTTCAGAACTAGA  
GTATCAACAGTGCATTATTTTAAACGAGTACTTTAAGGATGCCTAGCTAAC  
AAATGAATCACTTTAATTTGTAATACAGACCGTAGGAGCTGTTAGTGTGT  
GAAAGGTACTAATTTTGTACTCTTCTTTCCCAGACACCTTTTAAAAAGCA  
TCAACTGTTTTAACCTGTATCAACGTCAAGGTAGTTTATGTTACAAATAAC  
TTTAAATGAGTGAAATGAATCCTAATTTCTAAGGGTGAGGATTATTGCTG  
TCTTTCTTGAAGAGGGAATAAGAATCTGGTTAATCTAGTGGATCCTGTGA  
CCCATCACTTAATTGCGAATTGTCCAATCAGACTAAAGACTGGATGAATC  
CTGACACTAAAATATTGTCTCATCCCTCTTGAGAGAACTTTCACGCATAA  
TAGTTCACATTTGAGAGAGTACCTAAGGGAAAGACCTGGCATGCCACAGG  
GCTTGAGAGAACAGATTGATTGGATGGCAATACATAAAATCTGCTTGCTAA  
CATTCAAAGTTTTGGATGTCTGGAAGAGTTTAGTCTGTTTAGTTGCAAAG  
TAATGTAGCACCTGATCATGGGGCTATAAGCTCCCCCAGCTCTCATCATA  
GAAACCAACTGATTCCACCACGGAGACCCTGTCTGAACTGGTTTACGTC  
GCTATGCATTTCTATTACTCAGTAGAGGCAAACCTTTTGGATGGCAGTCAT  
AGTTTCCCATTTCATCTCATTTCAGTAGCATTCTTTACAATGTCTACA  
ACGTGCCAGGCATCCTGCTTTCTCTCCTCCATCTAGTATCAAATTCAACC  
CTACAAATATTAGAGACTTAGAGAGCATTACACCTTATATAGATGAAGA  
AACACATTGGAAAAGTGTAAGTAGTTTTCTAAGTCACTGACAAAGTAGG  
ATTAAGTGTAGATTTTCATGAATTAACAAAAAATCCCAACCTTAATTTCTC  
AAAAAAAACCCCAAAAAACAAAAACAAATACACCAACCTTAAAAACGA  
ATAGAACTCAAAGTCCAACACAGTGCCTTACATGTAATTTGCATGTAATA  
GGTTGTTAATACATACTTTATAGTACAATTTATCTTCTAACTTCTGAGT  
ATGCAGAAAGACTCGAGCACCTAGCTGGCTGTCATGAATCAGGACAATTT  
TGCTGTCCAGGGACTTCTGTGGTTGGACAACCTGCATCATGAGGATAATCC  
TCCAGACTCGTGGTTTGTAAAGCTGAAATCTGAGGATTCCGGGCCCTGAGA  
GCATCTAGAGAAGGGCAAAGAGAAGCCATTTGGGTAAGATTCTGTGACCA  
CTGACCACCTCACTACAGCTTCACCCTGAGTATTTTCCCTTAGCTTCTGA  
AAAATACACATATAAAAGTACTCTGTTTTGGAAGGGAAATTTCCAGCTTT  
CAGACAAATAGGAAGGCGTTCAGTTAGGTGAATGATAATTTTACCTTAGG  
TCTAAACAGTTTGGTGTCTGAGTAAAAATTAAGTGTACAAAGAAATTCAT  
CTATTTTGACTGAGTTCAAGATAGAATTATCATAGAATGATAACATTAAT  
TTATTTACAGATAAAATCCATTTATTACACACACACACCCTTCATATCT  
TCACTCAAGATATCTTCAGAGCACCTGTTGGAATAAAAAATGTATACAAGC  
TGACAAGCTTCTGAAGGAGAGAGAAAAGATCATGAAATAAACTCTCAGG  
AACCAAAGGAAAGTCTTAAAAGTAGTGCTAGAGATTGGCCGGAATGTCAA  
CTTATTCAGGAAGTGATTAGCACAGATATTATCATTCTTGGGGAAAGC  
TATACATCTGGCCAGCCAAAACCTCTATAAATCAGCAATGTAACCAGAGTT  
GGGAATTCCATTAGCCCTTGATTTTGAGGAGGTTAGCATTTTAAAAAACG  
TAGCTAAAATACTTATGAAAAACAATCCTCTCTGAACTGTGTGTGTGTGT  
GTGTGTGTGTGTGCACATGGAGTCAAGCATTAAAGAAAATGAACACTGCTC  
ACTGCTGCAGTCCCCTGACAGCACATGTGGCTGAAAAATCACCAGAGTTG  
GCTGCTTTTGTGCTAATAGCAGAGCACTTGGTTTTACCTGCGACAAGAC  
TCTTTGACAGTTCTTTTGAACCTAAGTTCGGCTGTTCCCTCCCTCTGTCAGA  
GAAAGTCAGACTGAAACCTCGCATACCCTGCAGGGTGGAGGGAGTCCCT  
AAATTAGAGAAATATGGGTGTTTTTTTCCCACCTCCCTTCCCCAGGCTC  
GGTGCTTTATCCAATACACAAAAAGACTGACATTTCCCTGTCTGCTCCACC  
CTTGTTGATATGTGTGCCCAAATTTCTGCAGAGGTTTTTCAGACTTTTAATT  
TGTTTAAACAGCCTGATTCTAAAAATTAAAGTATTTGGATATATTCTAACT  
GGCTGAAATGGAATTTATCTCTTATTTCCCTCTTTCAGAAGAAGCTCAATA  
TATTACAGGAGGCAATTTATAATATGGGCTATTTTTGTAATTTGTCAGC  
TATTGAAATGAGTTCCGTTTGGCTTGGTTTGTACTCTATAAAAAATAAATTG  
TAATAGTGTCTGTAGAATCAAAATGGGGCCCTGTTACTTGAAATGTCCTT  
GGCACATATAGGTTTTTTTTTTTAGGGTACCAAGTTCCGGATGAAGCCA  
AAGTGAAGGAGAACATGAAGCACTAGAGAAAGGAGTTTGAACAGAAAGGG  
AGAGACATTAACCTCAAATAAGGAATGCTCATAACTTCCTTAAGATTTT  
TTAAATTATTAAAAATTGTTCTCCTGTTATGAGAATTCTTTACATTAACG

TTTGCTAATTAGCTGTTTGAAAAAGATTTCATTCTCTGAGCATTTTGAGG  
AGTTCAGTGGTCATTTTATAAATATTATTATGTGTTGAAATTCAGAGAAT  
GAGAATTATTCCAAAAAGAAAGCAAGAACCCACTTGTGGATTTGGATAGA  
AGTTATTTTGAATTTCCAGAAAAAATGCTTTTTGGGTGATAACTGGTT  
TGTTTCTGTTAATTCATCAATAGATCATAAGATTGAGAGTGGTGTCTAT  
TTGATTTTGTTTTTAAGGCTCCAGAACCCTCACTTGAAAATGAGAGAATT  
TTTGTAGAATTTATTTATTTATTTTAAAAATATTTTTTTAATTTTTTATTT  
ATTTATGATAGTCACAGAGAAAGAAAGAGAGGCAGAGACACAGGCAGAGA  
GAAGCAGGCTCCATGTACCGGGAGCCCGACGTGGGAATCGATCCTGGGTC  
TCCAGGATCGTGCCCTAGGCCAAAGGCAGGCGCCAAACCGCTGCGCCACC  
CAGGGATCCCAGAATTTATTTATTTGACAGAGAGTGTGCACACAGAAACG  
GAGGAGCGGCAGAGGGAGAAGGAGAAGAGGAACAGGGAGCCTGATGTGGG  
GCTTGATCACAGGACCCTGTGATCATGACCCAAGCCGATGGCAGATGTTT  
AACCAACTGAGACACTCAGGGGGCCCCAAAATGAGAGAATTTTAGCTTGAC  
TGTTTACAATAAATGATTTTAAATCTTTAGCTACTTCCAAGGTCCCATTT  
GACACTTTGATTTTCATATATAGTAGTAATTTGCCAGGTATTGAAAATTCA  
TATGTGGATTGAAATAAAAAATGTCAAATGGAAGCTTGGGATATTTACACA  
CATAGATAAGAGCTACACATGAGAAGGGCTTCAAGGCGTGTGTATCTCTT  
ATAGAACTGGTTTTTCATGAGGTGCAGATAGAAGTCTTAGGATTATATTTT  
ATTCTGCTGCATTGCTATTAAAGAAATTTGCCATTATTACCATTTTTGT  
GCCTCCAAACACCAGATTTTCCAATAGAAGTGCAGTGATCCACTGACCAC  
TGTTGCATTTTACCTGAGTAGTTCATTTTGCACACTCATGTCAGGGGCC  
TGGATGGAATTATAAGCCATGTAGGCCTGACTTCTCTACATTTATCATTA  
TCTGTTACAGAAGCTGAAAACTCTATTTCCGCATATAGTAATTTCTTTCT  
GAGGAATAAAAGCATTGTGTCAGGATCTAGATTAAGTCTTTTTTTAAAGA  
TTTTTTTTTTGTATTTATTTAGGAGAATGAGCAGAGCAAGAGGGAGAAGC  
AGACTCTCTGCTGAGCAGGGAGCTCGATGATGTGGGGTTCGATCCTGGCA  
CTCCAGGATCATGACCTGGGCCAAGGCCAGACACTTAACCAATTGAGCCA  
CCCAGGTACCCATAGGTAACTTCTTAAATTAACACTACTGGTTTTCTTTGA  
CCTCTATATTATCTAGAACTGTAACCTTTTTACCCTGCTGTATGCAGCTCC  
CATATTAGAATGGCCTACTTTGGGATTTTGTTTAAATGTAACATAGTCA  
TTAAGAGCAGATGCACCAAAGCCCAAGGCAGGAACCTCAAGCATGGGTC  
CACCATGTTAGAGCTGTGAACTTAACAAGATCTTTGAATGAATGTACATT  
ATTAGAGATTATTATTTTTTCATCTTGTATTGTATATTGTATCACTTGTAT  
AAATTATATTTTAGATATTGTTAAAAGACCCTAAAAATATTAGATACCAA  
ATCTTAATATTAGGTTGTGTCTCTGTGGAAAAGTAAATGAATAATGATCT  
AGTTAATTAGATTTAATGTGGATTGCTGATCTAGAAAAATCCAAATTTAA  
ATCTCAAATGACCATTTTTTCCCTTAGCTTATGGAATTTGAGAGGAGGCGA  
ATTATCAGTCAATGATAAACAGTTATTTGAGGGTCCATTTCCAACACCAC  
AGTCTTTTATGTACCATGAGAGATAGCTATGATAATAAAAGTATAGTAAG  
TACTTTGCTCTGTCAGGAGGAGTTTCTTAGTCAATATAATGGCAGCAAAC  
AAGAGCGGCCACAACCTCACTACCAAGATCTTTCCCTCAAACCTGGGTGAAA  
AGAGATGCCTTCCAGATCAGAAGCTTTGTGTGCCACCGCCACCACCAGAC  
CTACTATATTTGGTGCCCCAGTTTGGTTTCAGTCCACGATGTTAGCTGGAA  
GAACGGATTTCCCAAGCTCTCAGTAGAAAGAAAATCAAGAATAAACTGTG  
ACTAACAAGTTGGATCGGAGTGAGCACAGCTGCACTGTGATCGTCTGTTT  
GGGAGAAAACAGCATCAGGGCTTTTCCCCAATCATGCTACATCAGAACCC  
ATTCATAAAACTGTCAACCGTGAAATAGCAGATGCTCTGTAAATGGCCTGA  
TGATCCGGATATTGGGCATCTGAAGACAAGTAAGACTGCTTGTTCCTGA  
ACCATGAATATACTCACACGGTGCGCCCGCCACTCTCTAAGTGGTCTCAG  
CATACATGGATTTATCCATACCTCTATAGGCAGGTAATACATACCTAGAA  
AATATATTACTTTCCAACCTCCCTTAACAACCTGTTTCATCACTGATACTTTG  
TGAGCACCTTCCTTAAGGAAAACCTCAATGTGTGTCATGGGGACATTTATAG  
CATGACCAGTGTTTTGATTGAAAAAATCTGGTTTTTGTCTGTTTCTTGAGT  
GATCCAGAATCATTTTTCAGATAAGACCATCCATATCCAGCTATAAACCA  
TCTGCAGCACAGCTAGCTTTTAAAAGTGACATGCAGTCATATTCCACCGC  
TATTACCAGAGCGTCTTAAACATTTTCTCAACATCTCAGACTTTTTTTTTT  
TTTTTCCCCTGCTAGGCAGCTGCGTGCTTGGAGAGTTCCCAGCATCAGTT

GTGCCAGAGTTAAAAATCACCTAACACCCACATAAAGATTTCCCCCCTT  
TATGAATTGGGCTTTAAATCTTTACCTTGATTTAGTGAGAAAATAAAATT  
GGGCAATAGTCAATGTCTCATTTGTATATATTTGTATGAATTCTGTAACC  
TGGAGGATATCTCCAATCCGAGGAAATGTAACCATTAACCCACAGCTAAA  
CAGTTTGCAAAGAAGCCTTTTCAAGGAATAGCTTTTAAATGCCCAAGGAG  
CTCAATCTAACGGCAGAGATATTTGAAATATACACAAACATACAAGGCTT  
TTAGATAAACACATTTTCAGGGAGCTTTTGATGAAAGTGATAAGTTACAT  
TCTCTACAACCTACACACACTGTATTTTATTACCCTTCAGTAGACACTTAT  
CAGCTATAAATGTTGGGTGGTTTAGGCTAGGAATCAACCCTGAGGGAAAC  
AGTGGGAGGACTCTGGGACTCACAGTTCTATAGATCAACATAAACCTGAG  
ACTCAATTTTATTTTCATTTATTAATAAGGTCTGTGGTCCGCTTCTGCAA  
TTTCAAATCCATTAGCTTCTTGCCCCCTTTAAGAAAAAAGAAGGTAAC  
TGCAGATTTTATGGACTGATTGGTGATGGCTATGCTACTGCTCTATTGGT  
TTTGAGTGGAGAGTCCATTACAGATACATTATCCATAAACCATGTTTCCA  
GTGGAACCCGTAGCTTCCAATCTGACTGGGGAATGAGTGGAGTTGGCTTG  
GTCAAAGAGAGGCTGGGGAAAGGGTCAGGTCTCTTGGAAGCTAACACAGG  
GTAGGCACCGGTATAAATTACAAACGTTCTTCCCTACTTCCACATAATTAT  
GTCTCAAATGTGCAGCGGTTGGATTTTCGTTAACCAGGCACCAGATGAACT  
TGGAAATCATATCGACAGTAGATTAGAGTGGGAGTTTTCAACCTTTTTCC  
CTGCCATGTATGTTCAAACAATATATTTGTCTGTCTTTGAAACTCCCTGC  
TCTGGGCTGCTCATATTCGACAGCTGACCATGCCCATATGGTTTTTCCTA  
GTCTCAGGTGTGCTATGTTTAAAGCCTTTTTCAACAAAGATGCAAAAACAT  
TTTTAATGGCAATAAAACAGATGAAAATACGGTTTTCTAGTTCCTCTGT  
AACCCTAATCTTTGATTTCCAAAAAGAAAACAAAAGTTAAATAAGTCTT  
CTGGTGTGATTGCTTGATTTCTGTGTTTCGGTAACTTTTCTCTCTGTGAAA  
GGGACAGAAGAACAATGAGAACAATACTGGCATTCTGTGAATGAAGA  
CTTAGGGACAAGTCTCGTTGATCTTTGAATTTTAGTACGCTACAGACTTT  
ATGCTTGGCACACGGTAAATGCCCTATGAATTTGTCAAATGGAGCTGGAT  
TTTTTTTTAGGTGTAATCAATCGCATGAACTAATATATTCATTCTTACA  
ATGGAAAGCTATTTCTTTTCCATTATTAAGGCAAAGGCAATGTCACTTAA  
GCAAACTCAACAAGAATTTAATTCCCCTTTTTTCTGATGGCTTTAATTT  
ATGTGGTCTTTTTCAATCCACTCCCTATGCATTCCCTATCTCTACAACCTG  
AAGTTTCTACTTGGATTTGCCAGTGTGCGTCGAAGATGTGGAGGGGTCTT  
AACATACCTCTCCCTAATATTTGGGGTTTGTCTAAATGGAGCATTACAGAG  
AGCCTACTCTGGTTTTTTTTTACTGTATTTTTTAAAGATTTATTTATTTA  
TTTATCCATGATAGACAGAGAAAGAGAGAGAGAGAGAGAGAGAGAGGCAG  
AGACACAGGAGGAGGGAGAAACAGGCTCCATGCCGGGAGCCCGACGTGGG  
ACTCGATCCCGGGTCTCCAGGATCACGCCCTGGGCCAAAGGCAGGCGCTA  
AACTGCTGAGCCACCCAGGGATCCCCTGTATTTTTTTTTTAAAGCCTTTTT  
TTGGTTCACAGAAAAATTGAGAGGAGAGTATAGAGATTTCTCTTATACGC  
TCCGCCCCCTACACATGAATGGTTTACCCATTATCAACCTCCCAGAGTGCC  
CCCAAAGTGGTGCAATTTGTTATACTTGATGAACCTACAGTGGCACATCA  
AATAGTTTACCTAGGATTCACCTTGGTGTGCACTTTCCATAGGTTTGG  
GCAAAATGTCTAATAACGTGCCTCCATCATTATAGTACCATAGATAATTTA  
CTGCACTAAAAGTCTTTTATGCTCTGATTTAATAGCACATTTGCATCCAT  
TCATCAATTAGTCTATAGCCACCAATCTGTCAATTTGTGACAATTATTTTAA  
TAATTTTGCTTTCTAGGGGCACCTGGGTGGCTTAGTGTTAAGTGTCTGC  
CTTCATGATCCCGAGTCTTGGAATTGAGTCCCGCATCGGCTCCCTCTAC  
CTGTGTCTCTGCCTCTCTCTGTGTCTCTCATTAGTAAATAAATAAAATCT  
TAAAAAAATAACTTTGCTTTCTAGTGAATGTAAATCTAGGTTTAAAGTC  
TTTCCTTCCATTCAATGAACCTCTTTGACAAACAATTAACCTTCCTCCCC  
TATGTTCCCGATCTGCCTATTGCCTTTGACGTTTTGCTAGGTATGTCACA  
TTATATAAATGTCTGAATCAGACATTAACCTTTAAAACTCTGCAGTGTGAG  
CGTTATAATCATAATCATCAGCTAGGAGTCATAGCCACTCATTGTTTTAG  
AGCTTAGAAAACCTTTGAATGTGGAGCCTCATCCCAAGCCCTCCCTCTTTC  
GTTCCATCCTTTTCGGAAGTCTGCCTTGATGGGAGATCCTACTGTCAGGT  
CCCGTCTTCACAGAGCTGTCTGTCTCATCAGGCCAGCTGCCCCACCAAAG  
CGTGGGGCACCCATTGGCAGGTCTGTTAACAGAAGCTGTTAACAAAGATC

TGCTGACCCTGTGCTCTTTAAAGATGTTTAAAATTCCATCCTTTGATGCC  
CTTTGCCCTTTGCCAGGGAGATATCAACCCCTCATCTCTGGCCACTGGGC  
CAGAAATAGACAACACAGTGACAGCGGAATCGCTATGTCTTGATGGAGGTA  
CGTGCTGAACACAAATTTTAAAGATTTAAAAAATTCATAAAAGCATCTTT  
CTCTCCACCCACGCTGGATTCCCAGAATACACTGTGCTCCTCTTTCTGAC  
TTGGCACAAGAAGTGCCAGATAAGGTTTTTCCAGCCGCGGCCTATAAGCA  
ACGGGGAAAGGTTGAAACAGGTGAGGTTAGCTGCGAGAAGTAGTACCTTC  
CATTCAGCACCCACGACTATAATGTAGTAAGTAGGAGTAAGAAAAAAGA  
GTAGAGAATTTCCAAAATGGGAGGCCCCAGAACCATTATTGTCTGTCGTC  
ACGTTAGCCCTCAATAAGACCACAAAACCAGACAGTAAAAACTGGGAGCC  
TGTGGTTCCCTCCTGACCAAGGGAGACAAGAAAACAGAGAGGGAGAGGCT  
ATGTTTTCTTTTGACTTTTTTAGGGAACCTCCTCATGAAGTCAGCCTTTCC  
CTGTTTCAGCCCCGGCCTGACCACTGCACGGTGGTTGTTCCATCTTTTCTA  
GGTGCCGTGTGCTTTGTACGGACACCATATGCTTGCTGTGGTTAAATGC  
TCTATGCCAGGCCTCTCCACCCCTCCTAGAAGAAGAGTCATTTCTGGGTG  
GAGTGTGTGTGTTTATGAGTGAGAGAGAGGGGTTGGGGGAGAGAGAGATC  
TTCTTGCCACCAGTGCCCATGCTGACCCCAAGTTAAACACACATCATGCAT  
GACTCTTATGCATAAAGGCAATCTCAGTTTCCAAGACTGTGATTGCCATC  
ACCTGTCCTCATTTTTTACCCCTTTGTTTCCAGCGAGCACTTCTTGGAAG  
ATAAAATGGCAAGGAAGTTTCCACATTTTACCATCGTTGGAAACAGCT  
TTTGCACAAGCACAGAATGTCAAGTTCCAAACAGCAATGCCTCTGTTAGT  
GGTGGCGTGTCTTTGGCTCAGAGCTCCTACTGCACCGAGTGATTAGAGTC  
AAAGCCTGTCCAAAGAGGCAAGAATTACAGAGGTGGGCTTGGGCCTTGG  
ACACTCTCTTCCGACCACTTCATTTTACCCATAAAGGAGCCGTGTCTCTG  
CGAGGTGTAATGACCTGCTGCTTCATAGCAGCACGGCTGGCAAAAGGAGG  
TCCCTTGATTCCCATCTGTCAAGAGCTTCTTCTAATATGCGACCTCAGTC  
ATTCTTGGCAAATTGTCTACAAGGGGATGAGTGATAACCCGGATCCTTGA  
CGTGTGCGTTATCGATTTTCTCAATAGTATCGAATTCCCAGTGTTTTACT  
TAGCCTAATATAAAAAATTAGCCCTGATTGCATGCAGATCAATCTCACTCA  
AGTGAGAGACAGCCAGATGCATGTCCAGGGGTGACGCATGTTCAGTGGT  
GAGAGAACAGCAATTTGGAGATGGGCGCATTATTATATATAATCCACAGG  
GTGGATAATCTCTGGGCTTTTATTACAGTGTGGTTCTTCCAGTTTTTCA  
ATTTACCTCTTCTGTGGGTGACTGGTTTTTACCAGAGGAAACATGGACA  
AGTGTTCTTTTGAGAAATGAAAACAAGAAAGTGTAGATTAAATGCAAAG  
GAGAAGCAAAGGAGAGCACTAGAAGTAGGCATCGCAGCTCAGCCTCCTTT  
GTGGTTCCCTGGCAATGCTGCTGCCACCCTCATTGCTTCGCACATAATTA  
GCCTTGATATTGGAAGCCACGTTTGTAGATCTCACTACCACATTTTCCT  
GTATATTACTAAACATTTCAAACCGAGACAGAGAGAAAGCAGGAGAAAGT  
GATTTCCACTGGCAAAAAAGGCTCACATTTCTTCTGTCTTGTAACAAA  
AGAGGAAAAATAATGGCAAAATATTCTTACGATGCCTTCTTTTCTTAAAC  
TCCCCCCCCACACACACACCCCTTTCTCGTCCTATTTTAAATAAAACCCG  
ATGATGCAAAAGGCCGTATGCCTTCTGACTGCGCAGTCCGTCGGCTTGCA  
ATGGAAATGTTTTCTTATTTTATTTTATTTTAAATGGCTACATAT  
TAAAAGCGAACCAGTCTTTGCCAGCTTTGGATAAAAGGCTATTTATTTTC  
AACCAATTTGATAGCTGCAGTTTTTCAGTAATTGAATTTTCTGTGGTCAGA  
AAAGCAGTAATCTTAGAAACCAAATAAATATTTTTTAATAAAATGGAACA  
CTGAGAAACCCTATAATAATGTCAAAAATGTAGCCACTTATGGATGGATA  
AATATTTTAAGAAATTTACATTTTACCCAAAGCTTTATGCTGCTGGCTTC  
CCTGGAGATTTTGAAGAGCGTAACATTTTGCTTTGAGAAGGGAACAATGT  
GGGTTTCAGATGAAATATGTACACCCTATAGAAACCTTGCTGGTTGTTAA  
TGTCTCAGAAGCTGGTAGCTCTGTCAATGCCCCAGCCAAGTGTCTGTGG  
GCACCCAGATTTCTCTGTCTTGGTACTGCTGCCAGTTGAGGCCAGGTAAT  
TCTTTGTTGTGGGGGGCTATCCTTGCGTTGTAGGATGCTTAGCAGCTTCT  
CTGACCTTTTACCCTCCATCGATTTTTCGACCCACTCACCTGTTGTGA  
CAACTAAAATGTGTCCAGACGTTGCCATCTACCTCCTGGTCTATGGGGCA  
AAATGAGCTGCAGTTGAGAAGTACTCATCTACTGAAGGACTGGAGTAAAT  
TTTATACATATTTTGGTGAATCTTTTTTTTTTTTTTTTTTTTTTGGTGAA  
TCATATGTGCCTGGAATGTTGGTTCCTTTTACAAGTTTATCATTTAATGG

CTTGTATTATTATTCTGAGTGTGAGTAAAGGCCCTTCACAAGCCCTATAA  
AGAGCCAATGCTATAGAAAGCATTTTAAAGAGCCAATGAGCACGAGTTTTG  
AGAGAGGAAGTACAGTCCAGATAGTTTTATGTTTTGATGTGATATCACTT  
TATTGGAAGCATTCAAGTTCTTGGCTCCTCCATCACCTCTGTGACCGACT  
GTAGGCAATGATTGATGTTATACAATTACCTTTATTGTGTTTCTGTTTTT  
TTCCATGATAGAAATAGAGATGGTACAATAGATACGTTCAAATTTCTCACT  
ACATGTATTATATCATATTGAATGGCTAATGAGATTCAATGTTTGTATAT  
AAACTGAATTATTTCTTATAGTTTTTTGTTATGAAAATATAAACTTAGGA  
AATTTTGGCATCAAAATTTTTAATCTCCCTGTTTCTACCCAGGATTTTTG  
CTAAGCCACTAAGGGTAGATTTTGTGTTACCTGTCCTTTCAAAGACAGGG  
CTGGAAGAAGCAAAGCAGATCATATGAAGTTGAGAATGGAATGGAAGGT  
CAAAGAGAAGTTGGCAGCACACGACTTTTTTTCTTCTGTCTGCTAAATAA  
GAATGGACAGAACGTAGTAAATGCTGGAATAATACTCTACATTCATTGGG  
TTCCACGTTGTGATTGAAATTTTACATGAACAGAAAGTCAAAGACCAAGAT  
ATTAAATTATTAGTTTTTGGTTTCATGAAGAAAGCAAAAAATTCCTCCAGAA  
ATACATCACAAGACTGAGAGGCACCATAAAAACCACTAGATAGACCCTTT  
TTTGATGATGTGAAGGCAAGCCATAACAATTCTCAACTACTTCCCAAAGC  
AGTAGGAATGATGCTAATAAGACGATAACATCAGGATTAACAAAAA  
AAAAGCCTAGCATAAGCCAAGGGGTGAATTATATCACAGTTATCATTTCC  
AATTACATTCAACACTGTTCTTGTCCATCACTACCCATTTGGCTAGATCT  
ATAAGCCAACAGTGGCAATGGCTCACCTTGGTGAGTGTGTTTTAATCTT  
TAATGGCATATAACATGCAGTATTAATTTAAATTCATGAATGCATAAG  
CATGGCATAGACCTAATTTCAAGGTCACAATTTTTAAAGTACAGACTTTT  
CCCTAACGGTTGCTTCCTTGGTGTTTTTTGGAAATTTCTGGAGGCAGTG  
GGCACAGTTTTGGAATAATTCCTCATGTGCACATTTGTTGAGAGGAAGGG  
GAAGGAACAGTCGCATTTTGATGAGTGTATCCAGATCTATCCGTTGGCCT  
GGAAATTTTTTTTTTATCCTTCTGCATATGCATTTGTTTTCACTGATTTG  
ATCCATTATTTCAGTTAGATTAGTCTCCGTTTAATAATAACGGCCTCCCTC  
TAGCCTATCCCTTTAATGTTCTGTGAAAACGAAAACCCAGGTGGTTTTCAA  
CATGACACTAGGTGGAAATCAGTTATGAAATTACCTGTTTATTAATGATG  
TGTCAGGAGACTGACATGCTCACGGCGGGCACCGGCTGGAGTAGTGCTAA  
TGTAGAAATAACAAGACCATATTATGTGCAATATGTATTCTATAGAACTA  
TAACTTTCATTCCCTGGGGACACCATTGAAATCCAGATGTTTTATCTCAA  
GATTTTAATCCCAGCGAGTGAAGATTTTAAAGTGAAATCAAGCACACCCG  
AAGTCGCTGTTTGGCCACACTTCCTCGCTGGGGGACCCGTGTGAGCAAAC  
ATTTAGTACCAGATGTGCAAAGGATTAGTGTCTGATCAGCTAATTAGCCA  
GACAGGGGAAAAAAGTCATTTTGCAATTGCAGAAGTGGAATTAAGCATA  
ACTTTAAATGCGTGTTGAAGACTGGTCTATTGATTAGCGTCAATGACAC  
TTTCAAGGTTTGGTAGTTATGGAGCAAATAAGGGCTGATCTAAATTGGG  
GAGAAACGAGTAATTTTATTTAAAATAAGGAATTTTACAGGAAGGTTTT  
ACATTTTATCATAAAGAGATCTGGCCACAACACTATAAATAATATACTG  
GATAGATTATACAGGCCACTCTTAAAAAAATTTTAGCATGCAAAAATG  
TACCATAAAGTTGATATTAGTACCAGGTAAAATAAACCAATGACCCTCAC  
AACTTGGGTGGGGAGAAGATTTCTTTTTCTCTTTTTCTTTTTCTTTTTCT  
CCTTAGAGTTTTATGGAGCAACTCATAACAGATGGGGTGGAGAAATAG  
CAATGATCTGATGATTCTGCGTTACTGCAAATAAATCCCAGTATATAACA  
AGCAACTGAATCATTTTTACAAAAATACACTCTTGAACAAGATATATCAC  
AATAGCTGCATTTGTATCCCAAGCATGTTGCACCCCGTTTTTCTAACAC  
CCCGTTTTTAATACAAGTATGTTATCTCCTAGAGTCATCTCTCGTCCTGGG  
GCCCAGTCCAAGTGAGTGTATGTAACAGCCAGCAACTTTGGCCCTGAAT  
GTGGAGAGTAACCTGAAGCCACAAATGTCTTTAAGTCAAATAACTTCTGG  
ACGCTAAGGATCCCTGCTCTAATACAAAATGGCAAGAGAATTAAGAACAC  
ATCAGTGTGCTTTTACAAAAGAGAGGAAAAATATTACCTTTTTTACTCCT  
TTGGACTTCAAATAGCATTTTGGCAATTTCCCTGCACTTAAGAAACCTTC  
CCCATGGCACAAAACCATGGAGCTGAACGCTTAACTGGTGGGAGGGTGGG  
GTGGGGTGGGGGAGATTTGGCCAGGGTAGATAATCTGTCTGTGTAATTAA  
TAAAGCACATTGGCTTTTTGTGCTAGGAAACCAGGCAGTGGAATCACCCAT  
TGCTGATTCCTGGAATTTAATTTCTAAAAAGGTAATGAGGTGGTGAAGA

AAGCTTTAGATTTTCAGCTCTGGTATCACCCCTTCTCTGTCTTATGTGATTT  
GATGTCCTAGTTCTGTGCTTTCCTGAGATTTTTTTTTTCTTTTTCTTTAC  
TCCATCCTAGCCCTTTTCATAGCATACTATTTAGCTGTTTCTGGATCTTG  
CTGTTTGGGTCTTGGTTTCTTATCGTCCTACCTTTGAGCCACGTTCCAGG  
GCCTTAGATCAACGTTTAGCATGTCTTCAACACCAAAGGGTCTGCAATAG  
TTTGTCAATTTGCATTTTCATTTTCTTATTTGATGTTTACAACAGCCTTTTG  
AGGTAGGCATGATGAATATCAATCACCCCTACTTTACTGGGAGTTGGAGG  
CTGAAACTGACTTAATACTACAACCTGGGTAGGAAGAGGAGTAGGATTCTGA  
ACTAGCACCCCTCGAATGCAGACCTTGTGTTCTTTCCACTGTACTAAGCTG  
ATCCACTGCCCTGGGAGCAGGAAACCTAATACCTCGGCTACCAGAGACAG  
TAGGAAAATGCCAGTTGGTTAGGTGCTGCAATAAAAAATAAACCATATC  
TTGGAATTTAAAAGTCTAGAGTTTGAAGAAGAGGGCATCCCTTTGTAAA  
CAAATGTTTTGATTATTAAGCCAGCTTCTCATCTCAAAAACACTTTTTTC  
AATTTAGGTCCAATTTAATGAGAACCCAGGATTGATAAGCTCTCAAAAA  
AGGAAGAAAAAAACCCCTCAAGTTTCAAAGGAGCAGTAAAGATTTGGAA  
TATTCGTTGGAGCCTAAGGGATGTATAAAATCTACATGGTTATTTACATA  
AATTTCTTATAATTTCTATCACAAATATACTCTTGCTGTTTTCCCAAATC  
TTTATTTAATAATGATTATAATAAAATTAAATTTATCTCCACTGCCTTGC  
TCTTGATGCCAAGCAGCCAAAGTCAGCAATCCATTTTTTTTTCTTTTTCA  
ATAAAAGTCCCAGAATAGAAAATAACATATGACTGTGTGATGCCGATATTC  
ATGGTGGTTCAAAGCACAAAGTCCCAAGTGGAAATAAAATGTGGATAAT  
TATGAGCAGACTTGAGTTATTCTTTCAGTAAAGGTAGGCAGTGGGGTCTT  
CTGGTATCTCCTAATTTGCAGGGATTTGAAATCCCACAGGAGTTAGGAAT  
TATCCCAGGGCACTTTCTTCTTTCATAGTTTCCAAAGAGAGATTTTGTTT  
CCCCTAGAAATACCAGATTTAGAAATCCAAAGGCTAGAAGAGACGATAGT  
AGTAATTTTGTCTTAAAAAAGGAATAATTTTGTCCAAGCAATG  
GTCAGTGGCAGTTTTTATTCCTGGAATCAGTGTGAAGATGACCCTCTCGG  
CCAACACCATAAAATTAGGGAATTTGGTATCCAAGTGTCTTCTAATGTA  
ATAAACTTCCCTGGATACAATACCTGTCTTTATTAGCTAAAAAATTTGTT  
GTATTTATGGAATACGTGTTCCCTTGATTTCCCTATCATAGATTCCCTG  
GGGAGAACATAATTCAGTTAACCCAGTAAAAATAAAACAAAACCGAAAAAC  
AACAGCAAAAATTCCTAATTTTCCACTGTATCTTCCCCAATGCAATCAA  
TCTCCAGGTCTGTTGATTATCTACCATCTATCTATCTATCATCTATTTA  
TTGTGTGTGTCTGTGTATGAGTGTGTGCATGTACGTAAAGCAAACCTCCAG  
GCCTCTTCCCTCTTGATTTGGACTCTAGTCTATGTACACGTTATGTTCTC  
ATTAGTGAGAAATAGGTCTTAACCCCTCATCTCTGATCCAGTCACTGAAA  
CCAGGAGGAAGGGATTCAATTAATTAGCTTAGACAAATCAGGGCCTATCCC  
AGAAATGAGACTAATGCTAAATCCATCCAAATCAGATCGACTGAGCGTTC  
AAGGGTAATGGGGTCTTTTATTCAAGAAATAGTGGGTGCTTAACCTCAA  
AGTGACCTGTCCACTCTTATCATGTGCTCTAGTCTATTTGTGTTAGCAT  
GGTGAATTTGTGAGACTGTAAGCTTCTCTAGGACACCTGGGTAGGTCAGT  
TAGATTCTTGGCTTTTGTCTCAGGTCATGATCTCAGGGTCATGATCTCAGG  
GTCATGAGATCGAGCCACGTGTCAGGCTCTCCACTTACCTCAGAGTTTGC  
TTGAATTTCTTCTCCTCTCTCCCCCTTCCCCTTTGTTTCTCCCCATA  
CCCCAGGCTCCAGGACTCTATGTCTAAAAGTAAATAAATTAAAAAATAAA  
GAAAGAAAATCTTTAAAAAGGAAAGACACTGTGCTTCTCTAATTAGGAC  
CCATCCTATTTCATATTTGTATCCTATAACAGCTATCTTGTCAGTTGAAT  
TACAAATGCGGGGAAGGGATGGTCTGAGCAGGTGGGCACTGGTGCGTTTC  
CGCTTCTGTCTCATGTATGTACCTGTGTGTCTTGCTTTTGTACTTTAGT  
TTTTGAAGGATTGTCTCTTCTTGTGTTTTTCCACCCGGTATGACTCTCGG  
TATGTCTTTACTCCCTGAATTTCTCACAACCAAGACGTGCCTGAGAGACT  
TTGAAGCGGGCTACATCAAACAAAGGTTACACTGAGGCGAGAGCTTCCA  
GCCAAATTAGGTGGGGAGAAGTGGGAGGGTAGGAATCCCTGCCAAGCCAG  
CCATTGAGCATGCAGAGAAGATGGTGTGGCACCATGACAGCCTATCAGA  
AATAGCCAGAGTCCAACCAGAACTATTTGATTTGGGTTCTGAAGACTCA  
AACACAGCTGGTTGGGATTTCTTGTCCGTGTTTTATCCATCGGAGTTGC  
TATTGAAAACAGTTTGCAATTCATTTGAGGATTCTTTACATATGCCCTGA  
AGTATATGCGGCATTTAATTGAAAAACCAAAATAAAGACTTCCGGGCC

ATGTAAAGGGGCTGCCTTTGGTGCCAACACTAAACTGTATGCCTCCGTGG  
CTTTGCCGCAAGTGGATTTTGTACATGGGGATTCCCATTATTGAAAAAT  
TATCTTCGCCACAATTTTCTAGAGAGGCACTCCCGGCTCTCCTGGCCCCA  
CTGGGGGGTGGATAGCTCCTACTCCAATGTGGTCTCCACTTAGCTACCAG  
TTTTGGAGACAGACTCACTTCTAAAATGAGGTACTAATCAATCAAGAAGA  
ACAGTAGTTGAGGGCAAGATGTTTAAAAGAAATAACTGAGGAATGAAAGG  
AAGAATGGGAAGCAGGAGAAAGAGTGAGAGGGCGGGAGGAAGAAAGAAAA  
TGTCTTTGATTCCCTAAAATCTGTTACATTCAACAAGTCCTGTGCTGGG  
AAGGAAACCTCAAAATGTATTTAAAAGATGATTTAAATGTTTAACCTT  
TATTTCAACACTTGTGTTACAAGTCCCCCAACCCCCCTGTCCATGTCCA  
CTTCACGCAAGATTTTTTAAAAAGAAAAAGAAAAAGCATCTTCCTTTCCA  
AAGCAAATGTCTTACCACCTCCTGGATGGATGATCCCAAAGGACACGCTT  
GCCTCTGTTTCGTCTCTGGAAGCACTTGTGTTATTTAAGCCGAGGGAGATG  
ATGAACAGTGCTAGTGCATGCATGTAGGATGACAAAGGACAGTCCCCTCC  
CTCCCCCACATGTAGGGCTTGCTTTTCAATTTCTTCTTACGGACAAAAA  
CTGTCTGTATCACGGTAAGAAGGGGGGCGGGAGTTTTTGGGGGAAGAGGC  
TGGAAAAAACTAGCAAAGGGAAAAAAATTGGAGAGCCAGCCTGGCACCAA  
AAATATAATTTAGTGTGCAGGTATTTGATTTGATAGAAAACCTGCATTGA  
TTTAAAAAAATAGGCTCTTGACAAGGTCGTAATTCATTGAGAGAGGCCAA  
GCCTGCAGCTTCAGTTTGACATCCCCCTCCAACCTAAACCATAACTGGTT  
TTAGGTGATCCCCTGTGAGGGTAGCATGTTGCAGCTGGCAAAAAAATAAA  
CACTCCTGAGCCCTGTGCTAACAGAAATTTTTTTTTCTTTTTTTCCCCTT  
TTTCTTTCTTTCTTTCTTTCTTTCTTTCTTTCTTTCTTTCTTTCTTTCTT  
TCTTTCTTTCTTTCTTTCTTTCTTTCTTTCTTTCTTTCTTTCTTTCTTTCT  
TTCTTCTTTCTTTCTTTCTTTCTTTCTTTCTTTCTTTCTTTCTTTCTTTCT  
TCTTTTTCTTTCTTTCTTTCTTTCTTTCTTTCTTTCTTTCTTTCTTTCTTT  
TCTTTCTTTCTTTCTTTCTTTCTTTCTTTCTTTCTTTCTTTCTTTCTTTCT  
TTCTTCTTTCTTTCTTTCTTTCTTTCTTTCTTTCTTTCTTTCTTTCTTTCT  
TTCTTCTTTCTTTCTTTCTTTCTTTCTTTCTTTCTTTCTTTCTTTCTTTCT  
TTATGCCATGAGCTAAGGAAAAACAGTTACATATTTGTGAGTCCCAGTTTT  
GTTTGGCCTTTGCATGCTTACAAGATTGGTGTCTGCTGGGGAGAGGGAC  
ACTGCAGAACTGTGGCAGGCAGGCACAGAGCTGGTGGGCGGCTGGAACAG  
GCTGGGGGCAGGGAGGTAGGAAGGCGGGGTATGAAGAGGGAGAGACTCAG  
TAGCTGACACCTTTGAGTCTCCAGGCATCTCCTCCTGCAGGATCCCCTCC  
CTTTCTTTCTGCCTCAAGGCCAGGCGAATGTCCACTCAGAGCTCACAGGC  
AGATTCCTTCAGAGCTTAAGATTTGCAAAGGGTTAGCTATCCTAGTTTAC  
CCATTCAGCAACAATATTTTTGAAGAGTTTGATAGATAGTTAGATAGATA  
GATGATAGATAGATAGATAGATAGATAGATAGATAGATAGATAGATATAA  
AATTGGCCACTGAAGGGAGCTTCCCTAGTCACTTTTTTTGGGAAGTGTGT  
TAGTGGAACAACTCTTTAGGCAAACTGCAAGGTGAGGCAACGTCATAC  
TGTCCTCTGGCTGGTTTGTGACATGCTTGGTCCTCATTTGGCAGAGAACA  
AGCTTGACAGAGATTTAGAAGCTCAGCGAGGTTATATAGCTCAAGGTCAC  
CCAACTCCTCACTGGTAGTCAGGTCTAGGGCTTGGGTCTGTTGTTGGA  
TCCAGTGGGCTTTCCACTCTACCACATGCTCCACCATCATTTAAAGAATG  
GAAGAGTAACATACGCAATGAGGCATCTTGATTGGAACCTGAGAAGGC  
TAGAGGACAAGAATGGAAGAACCGATCAAATCTGAATTAAGGCTGAAGAT  
GCATGAATAATAATGTACCAATATTAGTTTCTGAGTTTGGACCAATTTCT  
TAGTGAGGTAGATAATAAGAATTAAGGAATCTGGGTAAAAATCCCTCAGC  
ACTGTATTTTTCAGCTTTTCTATAAATCTAAAATTATTCTCAGGTAAACC  
TTACTGTCTAAAGAAAGAAACAAACAAAGCAAACAAACAAACAAATAAA  
CCAAACCAATTGCAGTAAACCAAGGCATTCCGCTGCTTTAAAGCAAGTT  
TGGAAGTAGAATGCCTCCCCACAAGGGACTCCACTGAGGTCATGCAATAT  
GCAGCAATATTCCCAGCAACTGAAATGGTCTTGCTCCTCCTGAGTATAAA  
CTGGGAGGTGAAAATTGTGATTTTTGACATCACTGCAGAGATCTGTCAGT  
GGGCTGATGGTGAGAGGTGCTCGCTTCATCAGCTTCATCATGTTTCGT  
CTTTAGAGAAGAAAAATGACATTTTATGACGAAGTTCAAATTTACAGATG  
GGGAATTGAGGACTTGCATGCCTATCTTTATGTCTTGAGAGCCAGAGG  
ATTAGCAGTTATTAGCCTTGAGCGAATCCTATCTTAAGTCCAGTGTTTCT  
TGAAAAAACATAAATAAGATATTTCCCAGGAGCAAGCAGCCAGCTTCT

GAGAGTCGACTGTAGTCATGGCTTACCACCCAGACACTTGCCAGAACCTC  
TAAATTACTGACATTATTACATCATCCCTCTTTGTGTATGTGCTTGTGCG  
ATTGCATAAATATACCCTCTCTAACCCTTCTTTAATCTGTTCTATCCA  
CAGTATATATCACTAAAAAAAAAATGACTTCACAGATGACCAATTATT  
CCATAATAATGTGCAGAATTATTTGAATCACATTCAGTCTCCATGACAAT  
ATGAAAATATAAATGTCTGGCACACAAAAACAAACAAAAAACTGTC  
ACGGTGGTATAAAAAAAGGAAATTAATTCAATACTTTAACCAGTTTTTT  
TTTTTTACCCTTTGTTATCCTAAGTGGATGATGCAACTATGCTGCGTTT  
TAAAATACACACGCAGACAGAGAAATGGATATTTTTTTCCATCCTATTTG  
TCTCCTTTTTCAGACACAACCACTGATTACCAGCCGCTGGACGTGCAGCA  
GCAGCAGCAAAGGCGCCTGTGAACCTGAGTATAATAAATTTCTAGTATAA  
CAGTGTGTTGAATGTTTACTTTGGCTCTGCTGCCCTCTCAAATCCCCCTT  
TTCAACTAATATTTTAAAATGTGGAAAGACATTAATAATGGAGATAAATTC  
AAGGCTCTTTCTGAAAGTGAGTGTCTCTGACGCTGAGAATTCTGAATTTT  
GCCCTCTCTGCTACATTCAAATTCCTTCTATTCTGATAATTATTATGCCA  
TGAAAATTCAGTCACTGCCTGCCTTTTGGCAACTAGCAATTTTACTCTG  
AGGTAAAGGAGAAAATGGGGTTCAGATATGCTTTTATAACTGCTCCCATT  
GCATCACTGACATTTATAATTGGTCCTAAGGAAAAATGGAATTAATTGG  
AGTTTATCATTGGTGCTTCATAGGAGTGAATAATGAAGACTTCTGGAGT  
CAAGCAATGATGTGAATGAGGCTGCCTGTTACTACCCCTGTTACTGGAGC  
CAATCACCTGACCTTTCCATCCTCGGTTTCTTGATACATAAGATAGGAGA  
GTAGGGGCACTAATTCAATAGCAAGATTGGATTAGATAAAGCACCCAGCT  
TAGAGGGCACCAGACAATGTGGGCTCAAATGCGCTCACTGTGATGGTTAT  
TAATATTATTATGATCAGTGACTCCTTATCCCTTTAGAAATCATTACGAT  
TCCATGCCAGCTGAGGTTCTGTTTCAGCAGATAATAAAATCAAGTGCTTAG  
TCACATGGAGTTTATAGTCTAGAGGTAGAGATGGACAATACAACTAAAT  
AAATCTATATATTTTTTTGAGGTGGTAGGTGCAATAAAGAAGAGTAAGCAA  
GGTTAAGGGACTACGGGGTAAGGTGTGCTGTCTGAGGAAGGGTGGCCAGG  
GAAGACCTCTCTGAGGCAGTGACAGTTGAGTAGAAACCTGGCTGAAGAGA  
TGGACATTGAGCCAGGTAGATATCTAGAGTGGATTGTTCCAAGTAGAGGG  
AGCAGGGTATATTAAAGACCTCTGGGGAGCATGTTTGGCAGGTTTATAGA  
TTATCAAAGGACATTCTGTCCCTTCACTCCCTAACCCCTCATGTTTGTGG  
GATATTAAAGGACATCACCCCGCCCCCACACTGTGGTTGGGAAAGGAG  
AAGGAGATAAAGTCAAATGCTATAATGGGCTCTGGCAAAATCTTTGTCCA  
TATTGTGAGTTAGATGGAAAGAAGTCATCTGAGGGTCAAGCACCGCAGT  
GATACATCTTACCATTGCATTTTAGAAGTGAAATCTGTGCAGAGAATCTG  
TGCAAAATAGTGTGGCGAGGAAGAGGGAGAAGTCTTTGACGTTAGTCTAGG  
AGACATGATCATGACTTGGTTGACTTGGTATAGGGGTCGGTGGAAAGAGTT  
GGTGAGAAGTGATTTTTTTTTTCCCTTTCAGATAGAAACAACAGACTTTTG  
TTTGTGAACTGGATGTTTAACTTCTATCTACCTGCATTATTTTTATTCC  
CATGTCCAACCTCACTCAATGAATATTTTTTAGGTGACTCAGGATAATCT  
TATGTTTTCTTGAACCAACCACTGTAAAAAGCACAGGTCATGTCCTTC  
CCGGAGTGTGGGCCCCATTACAGAGAGCAGAAAGATGTTACAGATCAGT  
GAACGCCAAGTTTGGGTGCCTCCTTTGCCTCTTAGTAGCACAGCGACCTT  
GGCAAATTAGGTAACGGTAATGGTAGGCAGCATTCAAATAAATAGCACTT  
AGTCTTCACTAGGCACTCTTCTCTTTTCCCTTCCATTGACTTTTACTAGAT  
TTTATTATGAGTCTCTCAACATGATGAGGTGGGTACTAAATAAATTATCC  
CTGGGTTATAGATATAGAAACCAAGGTACAGAGAGGTTACATGACAGGCC  
CATGTCTCACAGTTAAAAAGTGGAAGAGCTGTGATTTGTATGTGGCTCTC  
TGATCTTAGTCATCTGCTTTACTGCACCTCTTTCCACATAGTTCCCTTCT  
GAGAGTGTAAGAAACACTCATGCACACAAATAAAAAATGGCATCGTGTGA  
TAAATACCGTGGAGGAAAGAGTGCGAAGGCACAGGAAATGCAAGAGTGGG  
GAAGAACATTACAGGACGTACGTAACCAGACCAGATAGTCCGCTCCAGGG  
AGTTGACATTTCAACTCAGATCTGAAAGATGAGGAGATTCCAACGACTCC  
CAAGGTAGAGGAATGAATGCATATGACAGGCATTGAGTCAGAAAGAATGC  
GTGGCATGTTTGGGAAACCAGAAAGACAGCAGTGTGGCTGGGTAGAGTGA  
GCAATGAGAGATTTGCAGGTAAAGAGTCAGAAAGTAAGTGGGGAAGATTA  
GGCAAGATGCTGTGTATAGGATAATAGACATCTTTATCATCCAGAGTGGG

ACACTTTCGAGGGTGAAGACAAATGTCAGGGCACTCATTACCAGCGGGC  
ACCCTCTCAGGTGAGCCAGGAAGTGTGCCCACTTAAAAGATGTTGGATTT  
TACTTGAACCTCTAATGGTGAAGACTGGGTTTTCTATTACCTTAAAAAGT  
TCAGCTGTATATGTCCAACAGAAATTCATGTGTTTGTACACCAAAGATG  
TGTA CTGGAAAGGACACAGTGGCACTGTTTCCTAACAGCCCCGATCTGAA  
GGCCACCAAATGTGTTTGAAGAGTGGCATAGCTCTTGATGTTCATGC  
AATAAAATGTTGCCGAGCAGAGAGGGTGAACAGGTGGTAGCTACCTGCCA  
TGATATGGATGGCTCTCAACACTGCAGTATGCAAGCCACAAATTCATCA  
CCAAAAAAGTGTCTGTATGTATCATGCCGTGTTTATAAA  
ATATCAGTGCACAAAAGTTTTCTGTGATGATTCAGGTCAGGAGAATGAA  
TATTTTTAGGGAAGGTCATAACTAGAGTTGTGTTAATATACTAACTTTTT  
ATTTTTTAAAAAGATTTGATTTATTTATTCATGATAGACATAGAGAGAGG  
GGGAGAGGAGAGAGAGGCAGAGACACAGGCAGAGGGAGAAGCAGGCTCCT  
TGCCAGGAGCCTGACGCGGGACTTGATCCCGGGACTCCAGGATCACGCCC  
TTGGCCAAAGGCAGGCGCTGAACCGCTAATCCACCCAGGGATCCCCAATG  
TGCTAACTTTTGACCCAGTGTGTTACACAGGAGTGTGTTAGTTTGTGA  
GAACTCTGAGTTGTTTCAATTTATGACACATGCACTGTTTCTTATTATACTT  
CAAAGAGGGAAGCCATGCTTCCTCCTACATGGAGAATAAGGTGAAAGAGA  
TTTAGAGTCGATGTTGTCCAGTATTTGCTCCTTTATTGTGACTCCTTTCC  
AAGATGTCCACTTGATATATATGGAACATTTTGTGCTGTGGCCTTGGCAT  
CGCAGCCTGGGCACTGTTGATATTTGTTTCAGATAATTCTTTGTTGGTGG  
TGGTCATGGAGGGCTGTACTGTGCATCGTAGGATGTTTAGTGGAATTGCT  
GGCCTCTGCCCATGGATTCCAGTAGTGGCCCCCAGGTGCAGTCCTGATCA  
TCAAAATAGCCTCCTAACATTGCCAGATGTCCCCCAGGAGTAAAGATCTC  
TCCAGCTGAGAACCCTGACGGTAACGATCTCTGACAATAAACGTCAGA  
GCAGTGCAAATGTGGACCATAGACAAGCATCTCCATTTATTCTTCCAACA  
TCCCTATGGAAGGTGCTGTCAATTTGTCCATGTCTCCTTGAAGAGGAACT  
AAGGTACAGTTATTTTAGGCACCTTTAGGAAGAACTGCCACTAGCCAGT  
AGGTGACAGAGCCAGGATTTATGTCCCACCTCCTAGTGCACGTTCTTAGC  
CAGCATTTCTTACCTGCCTCTTGACTCTTTACCTAACACGTGGTCAACACT  
GCATCAGTTATGCTCAGATCAAGAGGGATATGCCCCAGGACCTTATGATT  
TCTGTAGTGATATGTCTTCAGAACTTTCCAGCCTTCAAAGTTACACAAGT  
TAGGATTCATATTTTTTAAAAAGTACTATGAGACTCAAGCTTAATAACCAA  
GTAATAGTGTGACTCACGAGTTACACCTTAATAAACTTCAAGAGCTCAC  
AGAGACCAATGTGATTATGGGACAAATTATTCCATTTATTTAAACACAGG  
GGAAATATACTTCTATTTTACAATTGCCCTGAGTTATATATAAAAACTAG  
CTTCTGGCCCTTTAATTACAGACAAAGGTAGAACCCTATGAGAGGCTCA  
TGAAGGAAGAAGTGCCATCCACACCTGAAAAGGTATTTCTTCAGGCTCCG  
GGTTCAATGGAAAGCTCTCCCTTATGCCCCGACCTCCCCAGTTTCGAGGTTT  
TTTCAGAAATATTTTCTCTGTGTTGCCAACTAAGTATGACGAGGGGTGCAA  
CAGAAATCAAATATCAAAAAGTTTGCTTTAAATAAACATAGTCGAATGATC  
AAGAACTAACATTGCTGGACACTAACATCATTTCCTCACTACTTTCTCTT  
GGGAGAATCTGGTCTCGACTCCACTTGCCACGCCTCAGTGGTCTCTCTG  
GGTTGCCCTCCCCCCCCACTAAAGCATGATGCCACTCTACTAGTGTACTG  
AACTGAAGTTCCCTTCCTGTGAGTTGCTCTTCTCTACAGATGAATTGTGT  
CCAAAAGTTGTAAAGTTGGTTGATTAGAATCGAAATGCACCCTCAAATAG  
GAATGCCACTATAAATGCCATTTAGATTCCCAGGCCAGCCATCCAAGAC  
TCAAAAAGAGAGAGAGAGAGAGAGAGAGAGAGAGAGAGAGGAGAAGTAAAC  
ATACCATGATAGCATGAGCTCTTGGCATAATTTATTCTAGTAAGCATGCA  
TGCGCATGTGTGATACATATATGTTTGTATACATGTAAATGTATGTATA  
TATGTTTACATATGTATAAATACATGCATATGCACACATAGAGCTTCTCA  
CTGAGACTAGATCCTGTACCTCAAGAGCTCTGAAAGCTGATAAGTGCAGA  
AAAATCACATTTTAAAGCTTTTGTGCAGTTCTTAGTGTTAGTAGTATTTT  
TGTTTCTTCCAGCTGCAGAAATCTAAATTCATCACAGAGGCAGTACA  
CACCTTTGTAGAAAAGATGCTCCAAGGACTCCTTTGAATATGCCAAGGTA  
AAGCGGGAGTTGCACTCAGAGGGAAAGACCGGGAACAATGTTAACAATGT  
GACGTTAACTCTTCTCATAATAACCTAAAGTTTGTCTTTCTTGAGTTG  
AACTTAAACTCTGCCAAGCATCTCATTTTAGGAACCTGTGTATCTTTTT

CTTGGGATTCCAGGGAACCTGGAAAAGGCAATCGGGGTGGGCACCTTGGTA  
GTGGACTAGTGGACCAGGATACAGGGGGAGAAGCTGTGCAAGTGTGGACC  
ATAGACAAGCACCTTCAACGTCACCTGAGAAGCTGGTTGGAATTGCAGAAT  
CTCGAGGCTCACTCCAGAGCCAGCATTTTCAAGATGGCCATGGACGTG  
TGTGCAGAGTCTTGAAGTACTGGCACAAGGGAGCTTTGACGGGGTAGAG  
ACTCACTCGTGGAGTCCAGCAACAGCCACGTGTAGAATCCACTTTTAAGA  
TTTTTTGGGTTTTACTTTGTAAATTTTCTGTGTTCTGTTATTGTTTTGTA  
GTCTTTGGCTTCATGGGGAGTTAATGGGAGGGCCTTGTCTTTGCTTGGAA  
AAAAAGTGCTTCTGGTGAACATTCTTGGTTCCTTTTTCTTTTTTAAAGA  
TTTTATTTATTTATTCATGAGAGACACAGAGAGAGAGAGGCAGAGACCCA  
GGCAGAGGGAGAAGCAGGCTCCATGCAGGGAGCCTGACGTGGGACTCGAT  
CCTGGGACTCCCAGATCACATCCTGAGCCAAAGGCAGACGCTCAACCGCT  
GAGCCACCTGGGCACCCCTCATTCCTAATTCCTATATGGCATCCACTTTT  
ACTTCCTAACAACCTCCCAGGTTTATCTTTGTTTCATTTCTTCTCAACAAAG  
CACATTTTGGGTGGGGCTGAGCCTACCCCTGCTCAGGAGGTAGGACCTGG  
TTGGTTCAGCCTCTCAGAATATGTTATTGGCCTTGGCTGTAGCCCTTGGT  
TCAAGATTGGGCATTGTTTTGGTCAGTCTAGACTTTTATAACAGAACCTG  
AGTGGCTTATAAAGGACAGAAAATTTATTTCTCCCAGTTCTGGAGGCGGAA  
AGTCCAGGATCAGGGCTTTGGCACATTCAGTGTCTGGTGAGAGTCTGCTT  
CCTGTGTTCTCACATGGCAGATGGAAGGAAGGAACCTTCCAGGTTCTCTT  
TTATAAAGGGCACTAATCCCATTCCATAAAGGCTCCACCCCTCACAACTAA  
TCCCTTGCAAAGGTCCAACCTCCAAATACCATTCCAGTGGGGACTAGGT  
TTCAACATTGGACTTTTGGAGGGAGGGACAAAAATGTTTCATTCTAGAGCAG  
ACATGGAACCTAAGCCAACCAGTCAGGATGAGTCTTGGTACTGTCCTTTG  
GAATGCTGGGTGAGACACACTCTTGCTTAATGAGAGTGAGGAAACATGTG  
GTATTATCACTACCCGCAGACTTCCGTGACCACGGGGTCCTGAGGAGTGG  
GAATGGAGAGAGTGAGACACAGGTGCAGCTGAAACCCCTGGAGACAGAAGA  
AGACAGTAGAAGAAAACGTGTACATGATGACATTTTCAAACCTGAGGATTC  
ATCAATTCTGAAGCCCTCCCTATAGATGGACTTCCCATATGGAAGCCGAG  
AAATCCCCCTTACTGTGCACGCCAGGTTGAGAGGAGTTTCTGTACCCTGC  
AGCCCATGGAGCCTTGAGAGATACAGTTTTTGGGAGGGAGTGGTGTAAACA  
TGATTGAAGCTGTGCTTCTAGGACTAAGCAGTGACCTAAAAAGTGCAAAC  
TGGCTGCCTCACTCCAGGTGGGGGTGGACTGGCTGATTTGTGTGATCCGT  
AAGTATTTCTTAGAGAGATTATCAAGAACATTTTGGAGGGGAACTTGGT  
AAAAGACAACTTCTGTGTTTGTGCAGAAAGAAAACCTCAGATTTTTTTTT  
TTTAAATCATTAAGGATGTGTGATCCTTGAAGCATGGAGATATCTGAA  
AGTTAGGTCACGTAATATGTATGGTACCTTGATTATGGAATACTTGGCAC  
AGGCAAGGGAATGAATCAGACTTAAATTCATCTCATTCCCCCAAATCCC  
TGTACCCCATTACAGCCTTAGCAGTGCTAGAAAGAGAAGTGTTAGCGAGA  
TTAGCTGCAGTCCCAGCTGCTAACACTTGATCCCAAGGCAGTAACTGATA  
CTCATCATGTCTTTTCTCCACTACCCTTTCCAGGCTTCCTTCTGCTCCT  
TGAGCATTTCTGCAGGGCTTGGTGGCTTACCTAGTGGGGTGACACAGATT  
CTCATCCTTGAGGTGTCTGAGCCCTTGAGTTTGTGTTGTTGTTGGTAG  
TGGTGCTTAGCCATGTATAGTTAAACTGGACATGAGGTAACCAAGAGGC  
AGTGGCAAACATATGCCCCCTCCCCCTGCCCTGACTCTATTTTGGAGCA  
GTGGTTTCGCTTCTCATGGTAATGACTTTCTGTGCTCGCAGTTCGCTGT  
CACAAAGATACCAAATATATGTGACAGCTTTAGCTTTAATTTTAGTGG  
CATTTTCCCTGCTGACAGGATCCCTTCTGAAATCAAGGATAACTAGGTCA  
CAGAGCCTAAATTTGTAGGGACAGGAAGCACACATTCCTCCACAGAGGTCA  
CCGAGCATGTGAATGGGACATTCATACTTCTGCCCTGATTGCCGAGCC  
CATGTATTGCACCTACTGGGAACATAGCACCAATATGAGACATCGGTTT  
AAGATGTTTTACTTACCAAGCCAAGCCCATCATGGAGGATGGAACCTCCATC  
TTTATAGGGTGTCTCTTCAAGCTGGCACCTAGGCTAAATCTGTTAAGAG  
GCCATGCTTTTTTAAATCCAGTAGCTTCTGCATGATATGGTATATGGTAGG  
ACCAGTGGATCCATGGCCATGTGCCCACTGCCACACCTCATTTTCTGTAA  
AGCATATTCCTTTGTCTGATGTGATGTCATGGGATCCCATGCTAGTAGAT  
GAGACACTCTGTAAGACCTGGAGAGTGGGGATGGGTGAGCCAGCCACCGT  
GTGCAAAAACTGCAAATCCATATGCAGAGTAGGAGTCAATCCAAGCCAA



TTAATGTCCTAACAAATGGAAGGTGTGATACAAATGACCCCCACGGAGGAT  
TTGATACTTGACTTGTGGTCCTTAAAGCAAAAGTATTCTTAAAATTTTAA  
TGCATAAACAAATGGGTCATAAAGGTGGTAGAGGTTTTTGTTCATCTCCTT  
TTTCTTCTTCTTCAAGAAACCATAACAAGCATGACTGAACAAAGAATAAA  
CTTCAAAGTCTTGCTGTTTGGTAGGAAGTGCTTTCGAACAAAAATCATGA  
GCTTTTGTCAATGAGACCTTTGTGAGAAAAGATGAACGCCTTTCCCCCAC  
CTCTTGTCAAAGTCATTTAAACGAAAGGAGGTTTGTCTACCATACAAAAG  
AATACCTCAGTCAGAGGAAGAGTCCTGCCCTGACAAACCTTCCCTTTGCC  
CCAAGCATGGTCCTGGCACTGAGTTGAGAAGTGATTTTGTAAATATATCAC  
AAATAAGGAAACATGGGGCTGCCCTTTTTCCCCCTCTCTTTCCTTTCTTT  
TATTTATTTATTCATTTTAACTGTGCCATCCTGTCTCTAAGAGATCTT  
CGGGGAATTTCTAAGGCGAGGTATTGTAACGAACACACGACAGTTGAAAA  
AGTCAAAATAGGTTTGCATAAGGCAGTTAGTTGCATTTGTCCAGGCGAGT  
CCACTGTTTCTTTAGCTGTATTTTACAGGAGTGGAGAAGAAATCTATGTT  
CTGGAATTAAGAAAAAAAAAGCACCTCTTAACCGTCTTCCCACCTTTCAG  
ATCCCAGTTTGACTIONTCCCCCTGCACAAATCAGATTGGTCAGAAGAGGAC  
CAGACTGGTAGTAGAAAAACATTCTATTTTGTGGTAGACAGTAGTGCTATT  
TTTGTGTTGCTTCCAAAGTCAGCCACTCTAGGGCTATATTTGAAGGCTAGAA  
GAAATAGTCCAGACCAGAAAGGTTTGGCATCATTCTCTTCACAAAAGTA  
TAGAAGGATAAGTGTAAGGAATTTTGGTTAAGTAGCTGTCATTTTAGCTA  
AATCCATAGCTTGATAGACACCCGTAGTGAGGACGATGAATTAATTTGCA  
ACTGCAGCCTCCCCAACTATCACTTCCATTTTACTTGTGTTTATGATGTT  
TCATCCCCTGATCCATTTTCTTCCATTATGGGTCAATTTTGACTCCGCCA  
TTGGATAGGAGGTTCTGCATTTACCCCTTCATTTGTCAAAACAAAGGAAA  
TGATGTTTGGCAATTATCAGTCTTTTTTTTCTTTTTTCAACCTAGATTTT  
TAGCAGTATATGATGCAAATGATGAGCAGAGAACACAAGTCCTATTTTGT  
GTGTGTGTGTGTGTGTGTGTGTGTGTGTGTGCACGCTATGGAATAAAGAC  
AGTTTCTAGGTGTAGGAAGTGAGGAAGGGTGATCTATGCTGAAGTGGGCA  
CAGGGACTTATGTTTGGAGTAATTGAAAAGTGAGAAGGAACTTACAAGG  
TGTGATTTGACAATTGGCCACCCTGGTGGGCTGAATTCTTATGAATAAGA  
GACCATCCCCTCCCCCCTCACACCCACTGGGCTCTAGGCAAGCATGGAGA  
TAGGAATTAGACACCTGTAATAATAGAGGACCACAGCGAACCCTTTATGG  
AAGAATCAGTCCCAGCACAGACAATTCTCTCTAAGTTACAGGCTTTTAAAT  
TTTCCAAATTATAATGATGTTGCCATCAAAAGAGACCTTCTTAAAGAACA  
AGTCATTACTTTGTTTTCCATCATTTCACATCAGGCTTGGTGCTATCAGG  
TTCTATGGAGAACATGTGCTCAAAATGGGAATTAAAACAAGGAAATTAATA  
AAAAAAAAAAAAACAAGGAAATGTAGAAATTAAGAAACCGACCACTAGCAC  
TTTGACTCACCGTGTAACTACTGACACACAACCTACAATCTTGCACATGGTG  
AAATCCAAAACCTCTGTGTTTACTCTGCTTCCCTCTCCCAACAAAGTGGGA  
GCACTTAACGAAAGAGAGCTTCGCCCTCCATCTCATTGGTACTCTTGGAG  
AAAGTCTTGTAAAATGACTAATTCTCTCTCTCTCTCTCTTTTTTAAAG  
ATTTTATTCATTTATTTATGAGAGACACACAGAGAGAGGAGACACAGGAA  
GAGGGAGAAGCAGGCTCCCTGCGGGGAGCCCAATGCAGGACTTGATCCTA  
GGACCCATGACCTGAGCCAAAGGCAGACGCTCAACCACTGAACCACCCAG  
ATGCCCCAAAATGTCTAGTTCTGCTTGGAGCAGTCTTAAAATATCTTTAT  
TTCTTAAAGTGAAAGTGGACCACTATAACCATTTACCCGAAGAAGGGTGCC  
GGCCAGCAATAGGAGTTCTTCTTCCCCCAGTTGAAAGGATTAAAATGTTT  
CAAATTCTTAATTCTATTATTAGACCATATGTGGGCCAGGGAGGAGGAGA  
TTTATGATGCCTAGTTTTCTTAATCTCCCATGTTTAGTAAAATACTTAAA  
AATGCCAAGGCATTTAATCATCATATATTGACTTAAGCCTCAGAGTGTTT  
TTCTCAGAGGGCTTTAGTTCAAAAAGTCGACCTTAAGCACAGGTCTAGAC  
AGAGTAACGTGTTTGGCTGAGAAAAATCGAGTTTACAGTGTCAATCCTTAC  
CTCTGACATTCCAAAGCTTACTTCTTATCTCCACCCAAAACCTTTTCCAAA  
CTTTAGAAACAAGGAATAGATACAAGCGGGGAGCCTGTTTAAATCTGTCTT  
TCTGTATCTCTCTCTATTTGAAATGTAACACAACCCACGGGATTCTTTT  
AATCTGCTATTTTATTATTAAATGTCACTTAGGGGTGCCTGGGTGGCTCA  
GCAATTGAGCATCTGCCTTCGGTTCGGGGCATGATCCCAGGGTCTGGGA  
TCCAGTCTCGCATCCGGCTGCCACAGGGAGCCTGCTTCTCCCTCTGCCT

GTGTCTCTGCCTCTCGCTGGGTCTCTTACTAATAAAATAAATCAAATCTTT  
AAAAAAAAAAAAAGTCAATAAGGCAATATGAATACTTCAAGAATGTTTTA  
AACTTAAAGTGAATTGTTTTCTCCGGCCAGAGACTGCCTTTAGTTTTTG  
TAGAATGCTCGTTAACAGAGACTTTATTTTTATGGTTTTTTGAATAGGAG  
TGGAATACTGATGTTTGCACATTCTGGCAATGTGTTCCGCATCAATAAC  
AACACAGCCAAATGGCTATGAGTATGTGGGATTGAAAGTGCCTGGTATGA  
AAAGTATAGAGTGTGCCTGCCCAGGATTTGGAGGTTGCCTGTGTTGCTAA  
GATCTGTGAGCCCTAAGGGGAGTTTCTCAACCTGAGTCTCAGTTTCTCTT  
CCCCGAACCCCTGGTTGCAGTAAAGATCAGATGGTGCAGTAGACGTGAAT  
CACTTGGCTCAACTTCTGACACAAAGCAAGCACTTAATGCCTCTAAATCA  
GTCTTTCTCTAAATTACCAGAGACACCTGGTATTATCCTTTGGTGTGTT  
GTTAAAGGTTGACCTGATTCTTGATACCTATGAGTTTCATGTTAGTGAATA  
AGGCACCAAGCAAAAACCTTCACTTTCTCCTGAACCTATCCCAAAGAGTTG  
AGACCAGGATCTTGAAAAGATGTCTGCACTCTCATATTCATCACAGCACT  
ATTCACCATGGCCAAAGTGTAGAAACAACATAAATGTCCATCAGTGGAAA  
AATGGATGAAGAAATGTAATAGGGGGAATCCCTGGGTGGCTCAGCGGTTT  
AGCGCCTGCCTTTGGCCCCAGAGCGTGATCCTGGAGATCTGGGATTGAGTC  
CTGCGTAGGGCTCCCGGGAGCCTACTTCTCCCTCTGCCTGTGTCTCTGCC  
CCCGCCCTCATGATAGACATATCATGAATAAATGAATAAAATATTTTTTT  
AAAAAAGAAATGTAATATAATCATACAATAGGATATTATTCAGCTTAAA  
AAAAAGAAGAAGAAGAAGAGGGAATCCTACAGTATGTGACAAATGAAAC  
TGGGACTTTTATACCAAGTGCAATAAGCCAGTCTCAGAAGAGCAAATACCT  
CATGATGCCACTTACAGCAAAAGAAATAGAGTAGTGGTTGCCAGGGGGATGG  
AAAAATGAGGAGTAGCTAATCTACAGGTGCAAAAATTCAATCATGCGAGAT  
GAATAAGTGCTAGAGGTGAGCTGTGCAATATTGTACCTCTAGGTAATGAT  
TCTGTATTGTACATTTACAATCTGTTAAAAGGGTAGATCTCATCTTAGGT  
ATTCTTACCACAGTAGAAAAACAGAAAAGGAACTTAGTATGTTCTCCGA  
TAGGGAAAAATCAGTTATTTTCTTAAACAGCAACAACAAAAATCGCGTA  
CTTGGTTATAAGTGCAATTTAAATGAAAATAAAGAACCGAAGTTTAAAGG  
TCTTTCTTTAGTTTCGTATTCTAAGAGCTTAGGTGTTACCTAATATAAT  
TCTCTTATTTTATATATGAAGGAATGGATGTCCAGAGATGCTAGGGGTGA  
GCAATTTAATAATAAGAAGAGAGTCTTTCCCTCCCAGCCACCCAGCCAGAA  
AGATCAGCAGGAAAAGGAAAGACATTTGCATAACAGGAGATCAAATTCAG  
CCTTCCCTACATAGGAAGGGCAGTTGGAATGACCAAGATCAGATATGTT  
TTCAGCCTGTTTTGGCAACTGTCCATTCTGAAATCTGCACAACTGAATAC  
ATAATGGATTTTGCATAGCTGGCTCCTGTTCCCTGCTAATTTTTTTCATCTG  
TAGGCAAACAATATAAGAGACCTGTTATAAAACAAAGACTTCGAGCAGGT  
TCCTGGATTCAAACCTGAGTCCTAATCCAGTCTATTATTTTCAGAAGGAG  
ACAGGGTAATGTTTCCTTTGCTCCATTTCCATGTTTACTAGGATACAACA  
TTGTTTCACTTGATTGCATCAGAAAATATGGGAAGAGTTCTAGAAATTGA  
CCTTACCACATGATCTCAGAAGGCTCTGCTCTGTGCGCCAGGGAGTTTACC  
AGCACAAACAAGCTCCAATAAAGAATGGGCTGCCACTAACAACTGTAGAA  
AACTGAACCCGTTTCCAAATTGAGATGGGAAGGTTTTGATTATGTTTCAA  
TGAATGTATATATGAATATATATGAATACATCAACTGCAACATCATATGC  
CCCCCTTTTTTTGGATATTCCACGGAAAGTATTGGTTTCAGAAATGCT  
TGGTATAAGCAGAGCATCTCTCACTTCACTTAGTACCTTTGAGACATTT  
GGCAGGGAGGTGGGATTTGTCTTGGCACCCCTCCCTCGTCTTTTGGTGCCT  
CTCCTTCCCTTTCCCATTTTCATTCCTCACCCCATCAGGTTTTTAATCTTG  
CTCTCATTTTTTCAAGTACTTCCCTTTAGGTGTTTGTGATAATGGCTTAAA  
GCATTCTGACTCCCAGAGGTTTAAGTACAGAAGTTTTAGCATTCTACTCT  
GGAGCTCAGAAACCTGGAAAGTCTTCGGGAAGCAAATTATTTGATGACCC  
CGGGACAGAGACATGGGGAGGAATTCTTCAGGTGCGCAGCCCGGGGGGCT  
TCTGGGTGTCCACAGAAGGTCCCAGGTGTGGCCTACCCATTCAATTAGTG  
TCACCTCAAGCTCCTATGATGGCATCTGAAACATTTGGGGGCCCTGTGAA  
TGAGGGCTCCCCCTCAACGTGAGGAGAAGACATGGGTAGGACTGAAAAGA  
AGAGGGTAGAAGTTTGAAATAGCTTGGTTTGGAAAACAAAATAAAATGC  
ATGCTGTCTTTTCACTGTTTCTTCCTTTCTATGCCTTCCTTCTTTCCTTC  
CTCCCTCCATCCCTCCCTCCTTTCTTCCCTCCCTCCTTCCTTCTTCCTTA

CTTCTCTTCTTCCTTCTTTTCTCTATCCTTCCTTCCTCTGTCTCTCTCTT  
TCTCCCTCCCTCCTTCCCTCCCTCCCTCCTTCCTTCCTTCTTCTTTCT  
TTCTTCCTACTTTTCTCTATCCTTCCTTCCTCTCGCTCTTTCTCCTAAA  
TTTCATAAATTTAACCTTTCTCTATTGTAAACACTTGGTGCCACTTTG  
AAGGAACTTTTCCAGCTACAACCAATGAGGCCTGCCTGAAGTAGATCAT  
GATGCAAATAGAGTCATCTCTTTGTGAGTGTGCTTTAAGGCCTTGTACTT  
AGCTATAAGCTTCTAACAGCCAGCTACAAGTGAACCTCTATGGAAGTTGC  
CATTCATTGTGTCTTCTCATTTAAAAAGTTTTAAATTTTAAATTAATTTA  
ATTAGTTTGACAGAGAGAGAGAAGTACACAAGCAGGGCGACTGGCAGAGG  
GAGAAGGAAAAGGAGAGGAAAAAGCGGGCCCCCTGCCAAGGAGAGAGCCC  
AATGCAGGGCTTGATCTGAGGACCCTGAGATCATGACCTGAGCCAAAGGC  
AGACGCTTAACCCCCCTGAGCCACACAAAGTGACCTCTTCTCATTTAAAT  
TTAATCTTACTTAGTCAAAAAAGTATTACCTGATCACTTATTAAATGCCAG  
GCCCTATTCCAGGTGCTGGAGATTAGCAGCACAGTGGCTTCAGGAGGTCT  
TCATCCCCATGGAGAATGGCAGACACAACAATAGGGACAAGTGGTGAGAG  
ATGCAGTGGTAATTTATTACAGAGAGACTGGGTAAGTCCTAAAATTTTGG  
TTGTTTCAGGGACAGCCTACTTGAGATATTTTAGCAGTGACATGAATGTCC  
GGAAGAAGTCACCAATGTGAAAAGATTACAGGAACAGCTGATTCAATTCTC  
CTAAAAGAGGAAACAGCTTGATGTATTCAAGACACAGTGTGAAGGCCAAC  
GTGTTGTGGTTTTAGTGGGCAAAGGAGGGACTGGTGAAAAATGAGGCACTG  
GTACAGCTCTCTAGGGCTTTGCAAGGGAGAAGTACCTTTGATTGATTTTA  
ATTCTTGAGGGAAGCACTTTAGAGTTTTAGGAAAATGAGGAATCCAACCT  
GATTTATGTCTTGAACACCCTCTGTGTGGAGCAGAGGTTCAAGTGCAAG  
AAGAGCAAGAGAGAAAGAAAAATAGTGGTTCAGAGACTTCAAAATTCAG  
GTAAAAGTTGACGGAGGTCTGTTGGTGGGGGTATGGTAGTGAAGATGGGAG  
ACAATTAATAGATTTTCATCTTTTGAAGGTGGAAGATGAATTGGATGGGG  
AGTACAGAAAAAAGAGAAATCAATGCTAATCCTATATATTGGGGTGGTGT  
AGAGGCTTATTCTAGTAGGAAAAAAAATCAGTGAGAGGAGAGAGTTTGA  
AGGAAAATACCAATAGGTTGGTTGTTCTATAATAAACTAGAGATACCTAT  
CAGACATCAATATAGATACCAAAAAGGCTGTTGGAATCCTAAGTAGAAGT  
TAAGACTGGAACCTACTTCAGGAATCAAAGTCACTTACGCTAGATTTGAAG  
GCAAGGAATCAAGTGAGTGAGGTCTGTGCGAAGTGTATACAGAGAACACA  
GAGCTATTCTCATTGTTAGGGGTCTGACGGAAGAGAAAGAAGCAATGCAG  
GAGACTCTGAAGTAGTCTGTAAGGTGAGATTAAAACAGAGAATGTGATAT  
TCTGGAAGCTAAGCCAAAAAGTCTTTACAACAGGGGAGCAGTCCCTGAGT  
GCTACAGAGCTATTTCAGTGAAATAAGAAATATAGAAATGGTCGTTAGATT  
TGGTCACATGAAGGTCATTCATGATCTTGAAAAGAGTAGTTTCAGTGGA  
TAATGGAGTATAGACCCAACTAAAGTGCGTTGTGATAATAAGGTGAAGA  
GAAGAAGAGTCCCAAGTCACTACATAATTATAGTTTGAATAATAACTCC  
ACAACCAGCAATTTAGCTTTTATGACCATTGGCCTTGTGGTCACTTTCTT  
GTTGGCATCCATGATCTTTGGAATTCATAGAAAATGAAAGCTTATAGACT  
GACTTGATGCAAAAATCAGAGCAGTATTTCCATCCATGAAAACCATGAAT  
ATTAAGAGCTACTGTGAAGTCTGCCAATAAAATTTCTCACCTAAAGTAAT  
AGACCATTTTCCCTTTCTCCACCCATCTCTCCTTCAAATTGAATCT  
CCGATAGAGACCAGGCATACTTCATCTGACTGGCTTCGCAGATATTGCCT  
CTTCTACAAATCGAAGGTCTGTGGCAACCCTGCAGGGAGGGAGTTTCTCG  
ACACCATTTTAAACAGCATTTGCCTACTTTGTATCTCTGTGTCCCCTTT  
GGTAATTTCTCACAGTATTTCTAAGATCTTTATTATTGTTATATTGTTA  
TGGTGATCTGCGATCGGTGATGGCAACTCATTA AAAACTCAGGTGATGGT  
TAGCATTTTTT TAGCAATAAAGTATTTTAAATAAGGTATATACATGATTTT  
TTAAAGGCATAATGCTACTGCACACTGAATATATATAGTGTCAACATAAC  
TTTAATATGCACTGAGCAACCAAAAAATTCAATGACTTGCTTTTTTCATGA  
TATTCATTTTATTGTGGTGGTCTGAAACCCAACCTCTAGTATCTGCAAGG  
TGTGCTTGTAAGGATCTTTAAAAATTAAAAAATAAATCAATCCATTTA  
AGAACAAAATTCCTCTGCATTAGCCTGGCAAAGATGGAACTTTAAGTTC  
TGAGGAAACATTGAAAAGAAAGGACAGGACTCTAGATAGAAAATCTTGGT  
TTTTTAATCAGCTCCATTTACTAATGGAACATTTTAAATGGCTTGAAA  
TCAGAGGGACAAATATGTTAAAGGGATAAATGTATGAGTGCTGGCAACCA

GGGTCTTATATAAAGAAATAAAACAAAAGAAAATCATGGAGAGGAGAGGG  
AATGTTGGATTTGTTTTAATTCAATGTTTCATCTTGGGCAGCCCCAGTGG  
CTCAGCGGTTTAGCACCACCTTTGGCACAGGGCGTGATCCTGGAGACCCG  
AGTCCCACATCGGGCTCCCTGCATGGAGCCTGCTTCTCCCTCTGCCTATA  
TCTCTGCCTCTCTCTCTCTCTCTCTCTCTCTCTCTGTCTGTCATGAAT  
AAATAAATAAAATATTTAAAAAAAAGTTTCATCTTAAAAATGGTTACCCA  
TAAATAGCAAGTCTTCATGGTCCCTGAATCTTGAAATTTCGAAACCTGAG  
GGAGACCCAAAGGACCACAAGGAATACCCTCATTTCTGGTGTTAGTTGTA  
TTTTTTTAAAGATTTTATGTATTTATTTCATGAGAGGCACAGAGACTTAGGC  
AGAGGTAGAAGCAGGCTTCCTGTGGGGAGCCCAATGTGGGTCTTGCTCCC  
AAGACCCCAGGATCACAACCTGAGCTGAAGGCAGACGCCCAACCACTGAG  
CCACACAGGTGCCCTGGTCTTAGTTGTATTGGAGAACAGGATGGCTGGAT  
TTCAACTGATAATTACAAGCCTCTATTATTAATTGTTCAATTATAATTGTT  
GTTTTTAAACTTAGTCTAATAAGTTCTTTATAGATCATCGATACTAGCCCT  
TTATCTGATATGTCATTTGCAAATACCTTCTCCCATTTCTGTAGGTTGTAG  
GTTGTCTTTTAGTTTTGTCTGACTGTTTCTTTTGTCTGGGCAGAAGCTCCTT  
ATCTTGATGAAGTCCCAGTAATTTATTTTTGCTTTTGTTCCTTGCCCTT  
CATAGATGTATCTTGCAAGAAGTTGCTGTGGCCAAATTCAAAAAGGGTGT  
TGCCCTGTGTTCTCCTCTGGAATTTTGATGGATTCTTGTCTCACATTTAGA  
TCTTTCATCCATTTTGAGTTTATCTTTGTGTATGGTGAAAGAGAGTGGTC  
TAGTTTCATTCTTCTGCATGTGGCTGTCCAATTTTTCCAGCACCATTTAT  
TGAAGGGACTGTCTTTTACCAGTGGATAGTCTTTCTGCTTTGTCAAAT  
ATTAGTTGACCATAGAGTTGAGGGCCCATTTCTGGGTACTCTATTCTGTT  
CCATTGATCTGTGTGTCTGTTTTTGTGCCAGTACCACACTGTCTTGATGA  
CCACAGCTTTCTAGTACAACCTGAAATTCGGCATTGTGATTCCTGCAGCT  
CTGGTTTTCTTTTTCAATATTCACCTGGCTATTTGGGGTCTTTTCTGATT  
CCACACAAATCTTAAGATGATTTGTTCCAACCTCTCTGAAGAAAGTCCATG  
GTATTTTGATAGGGATTGCATTAAATGTGTAAATTGCCCTGAGTAGCATA  
GACATTTTCACAATATTAATCTTCCAAACCATGAGCATGGAATATTTTTT  
CCATCTCTTTGTGTCTTCTCAATTTCTTTTGAAGTGTTCTGTAGTTTTT  
TAGGGTATAGATCCTTTACCTGTTTGGTTAGGTTTATTCCTACCTATCTT  
ATACTTTTGGGTGCAATTGTAAATGGGATTGACTCCTTAATTTCTCTTTC  
TTCGGTTTCATTGAGCTCAACAGCAAAGAAACAATCCAATCATGAAATGG  
GCAAAAGACATGAACAGAAATCTCACAGAGGAAGACATAGACATGGCCAA  
CATGCATATGAGAAAATGCTCCGTACCACTTGCCATCAGGGAAATGCAAG  
TCAAAACCACAATGAAATACCACCTCACACCAGTGAGAAATGGGGAAAATT  
CACAAGACAGGAAACAACACATGTTGGAGAGGATGTGGAGAAAGGGGAAC  
CCTCTTGCCTGTTGGTGGGAATGTGAACTGGTACAGCCACTCTGGAAAA  
CTGTGTAGAGTTTCCTTAAAGAGTTAAAAATAGAACTACCCTGCAACCCA  
GCATTTGCACTGCTGGGGATTACCCCAAAGATACAGATGCAGTGAAACG  
ACAGGACACCTGAACCCCAATGTTTATAGCAGCAATGTCCACAGTAGCCA  
AACTGTGGAAGGAGCCTCGGTGTCCAACAAAAGATGAATGGATAAAGAAA  
TGTGGTCTATGTATACGATGAAATATTACTCAGCCATTAGAAATGACAAA  
TACCCACCATTGCTTCAACATGGATAAAACTGGGGGGTACTATGCTGAG  
CGATGTAAGTCAATTGGAGAAGGACAAACATTATACGGTCTCATTTCATTT  
GGAGAATATAAAAAATAGTGAAAGGGAATAAAGGGGAAAGGAGAGAAAAAT  
GAGTGGGAAATATCAGTGAGGGAGACACAACATGAGAACTCCTAACTCT  
GGGAAAAAATAAAAAAACAAGGGGTAGTAGAAAGGGAGTTGGGTGGGG  
GGATGGGGTGACTGGGTGACGGGCACTGAGGGGGGCACTGAAGGTATGA  
GCACTGGGTGTTATGCTATATGTTGGCAAATCAAACCTCCAATAAAAACAT  
AGACAAAAATAAATAAACTTAGTCTGAGTTTCTTGCTACAGAAGCA  
TGCAGAACATGTAACATTTTTGGCCTAAGCTAGGAGTGATGGTTTTTAAAT  
AATTTTGTGTTATGTATTTTTTAAATATTTTGAAGTATTTGGGAGTATAA  
TTTTCTTTAAATTTCCCAAAGCTATAAACCAGTAGTTGGCCGATGAAACA  
TTTTGTGAAATAATTTGGTTCCACCCTCATCTTTTCTCACCATCCATCTG  
GTCGGGAAAATGGAACAACTTGCAATTTTCATGATAGAATTAAGGGTAAA  
GTAATGTCCATTGGTTTCTTCCGATGTCAGATAGAAAGCCGTAGAAATTT  
GTGGAGCTTTGTTATACCTTGGACTTAAGCATCACTCTTTGTGGAACGTG

CAGTGAGAAATAGAAGTCACTTTAAGGATAGAACATGACCTGAACCATCA  
AAAGATACTTGTTGGGTGTCCCTAGTTCTCCAGGAAAGAGATTGCCTTCT  
TTACCTTTTTAATTATCTCAGTTTTTCTTTCTTTTTTTTTTTTATTGCTA  
CAAGCTACTTGATTCATTAACAATTCATGAATGCTTTTACATTTTCTGTA  
AGTAGTAGTTTCAGAAAAGTACTTTTTGACAGAAGAGACATTACTCATTT  
TCTCAGGGGAAAAATAACCACTCATTAACCATGACATCAAATCTAGGCT  
ATCAATGGGATTATTAAGCCATATGATGCTTCTTGATGACTCTTATTT  
CTATTATTACTGCAATTATTTTTTACTCACAACCTTAAGTGAATAGCAAA  
ATATGTTTGGGAATCCTCCATGACAAAAAATAAAATCTTGGTAACAACACT  
TTTAATGATATGGGCAGTGTTCTAGAGCTTAATCTCATGAGTGACCAAGT  
AGCACATACTAACGAACCTTATATTAACCTAAAAAATAAAGCAGCCAGTAA  
TTTTACCAGCAAAATGGATTTTCTCTGAAATAGCACAAATTGGACTTTGGG  
ACATGAAAACCTATGGTAAAAACCACAGGCAAGTCTAACAAAGGAGAGGCGC  
ATTATTTTATGGAGAAGAAGGAAGAAGTTGGGAGGGGTGTTTTGAACAA  
AAGTCCATTGGAGGAAATCAAGAGTTCAGGGTGATGATGGTTTCTCATTG  
GCTAGATTGCTGGAGTGGTCCATTCTTGTAGGAGATGGGAGGTACATCTT  
TTCTTGCTGAGGCCCCGTCCATTGATTCTTCTTTCTCTTGAGGATTCTGT  
TGGGCTTTTTAATTGAAACTTTTTCTCTCTTCAATGTCAAGTGGTGGGC  
TCCCCCATCAACTTTCAAACCTCCACTTGGTGAGGCTCCCATTATTGATT  
TTCACACCTGATGACTCCCGTCAGATGAGGACCATGTTCCCAAAAGGCCA  
TTTTATTAAGATGCCAACAAGAGGATATCGTTATCTTTCTGGTTTGGATT  
ATTAGGATGGTCCTGGTAAAAATGTGGAAAAATGTCCTTAGAACAAGTAAA  
TGTTTCAGCCTAGGGACATAAGTCATCCAAAAGAAAGGTATAGATAGCTT  
TTTAAGACCACTATGGTGGAAGTCTAAACAATTTTGTGTATCATTTAAT  
ATTTGCCGTATCAAAGGTTTTATCTGAATTTCTCTGATGGGAGTATTT  
GCCTTCCTTTTATACTTCAATGAGTGCTTCAAGTTTCTTAGCTATTTGGT  
AGTAGGATACATTCAGGATGAAGGAGAAAGGAAATCTTAGGCTTACAGGA  
TGTGTGAGAAGAGTATTTTCACTGTTCTTGTGAAATACTTGTGAGAATCG  
TGCTCTTGCTTCATTTATCTGGCGGGGTATTAGACAGCTGAATGTCCTGA  
AATCCTATTACCTCCTCCTGCAGAGGATCAGCCTATAAACACCGAGGGAT  
TTGTTTGGATACCACTTACCTCCTAACACCCACCCATATGTGTTTAGTTGA  
TATAATTAGAATATTCCTCTTCTCTTGTCTAATGCCTGCCGGGGTGG  
AGCTCTGTCCTGAAAGACTGCCTAGCTTTCACTCATCATTTTTCCAGGA  
ACTATTCTCTGTGTAAGTACTTCCAGAAAGTGCCTGAGGGTTCTTGGTTC  
TGTAACCAGAAAGTTAACTTCTTAGAACCCCTGGTCTCCATGTTACAAAA  
CTAACTATAAGTCATGCTATTAGTTAGAGGGTGGATATACCCATGTGAGC  
AATCACTAATCAGTTACACCACTCCTGGTCCCAGGGCTGGGCTCCAGCTT  
CAGAACTTCATCTTTTAACTACCCTCTGGCAGCCACCATATATCAAT  
TAGGCTTGGTATGTGGGAAGAAACATAGTTTCCATGAGCTTTAAAGACTG  
TTGTTGCTGTGCCCCACCCTCAGATTCCCTGCTCTTGTCTATGGCAAGGCCT  
ACATGACACCCAAGTTTGCCACTTCCATGGTTTTCACTGCAGTCAGTCT  
TGTAGGGAACAAGCCATCAATATTTTCCATTCCCTAGACTTCCTATTCCA  
AAGTTATTTTCTCTCCATACCAACGTACCACTGAGAGCGTGTGTATAA  
TTTATGCGTAGTCCCTTCTGGCACATATTACTTAGATGGCTAATTGGTCA  
CCACTTAAATATTTTGGAAATCCAATTCTGTTTTCTTGCTGCATACTCA  
AATTCCTAGCATTCTACCGAATTGCATTGTGAAGGTCCTGCAGAGATGTG  
GCTTGGTCATCGCTTGGGTCCCCAGAGACCCCTGAACCAGCATGGGATA  
GAATGTTATTCTCTGATTCCTACTCTGCTGGTGGGCATGGTTGCTAAATGT  
AAGAGTTAACCTCTTCTGCATTGGCTTCTACTCCCCAGCGCCAGCTGAG  
CAGGTTGGAGTTAGCGAAAGCTGATATGGCCGTGCCTTGATATTCTGT  
ATCAATCCCATTGAGTGCCAGCATGCAGGCTACGACTCAGATAATTAATAT  
TTTGAGTCTGATGTGAGATGCTACACGTATCTCTTACAAGCTTCTTCAT  
GTAGTGTGGCCTGTTGGCATAACTTTGAATCTTGACATCGTTATTTATT  
ATTTATGACTTCATTATTTGCTAGAGGAAGATAAAGTGTCTGATTGATG  
ACATAGCCTCTGGAGCCGAAGAACCTGAGCTCATAGCCAGATCTATACT  
TATTAGCTATGTGACTTTGGGCAAGTTACTTAACTTTTTGTGCCTTAGT  
TTCTCTTCAACTATTATTGCAGTAAAGTTTTATGATTACTATACATATT  
AATGCAAAAAAGTGAAAAGAACTGAGGTAAGTGCTAAAAACATAGAATT

CTTCTCCTTCATTAGCTACATATCCCACAATTTCACTCATTTAAAATTTA  
ATAAATGTGCCTTTTCAGGAAGTTGTTTGTATTATTTTGTCAAAGGATGAC  
AAATGTCCTACAGGACAGGATTTGCATTGTTCCACTAAATTTAGACCCTT  
TTAAATACAAATCAAAACCACAATGAGATACCACCTTACACCAGTCAGAA  
TGGCTAAAATGAACAAGTCAGCAAATGACAGATGTTGGCGAGGATGCAGA  
GAAAGGGGAATCCTCGTACACTGTTGGTGAGCATGCAAGCTGGTGCAGCC  
ACTCTGGAAAACAGTGTGGAGGTTCCCTTAGGGAGTTGAAAATAGAGCTGC  
CCTATGACCCAGCAATTGCACTATTAGGTATTGACTTGTTTTGCTTAGCA  
TTATACACTCCAGTTCCATTACATCATTGCAAATGGCAATTCATTTTTTA  
GATGGCTGAGTAATATTCCACTGTACATATATATACCACATCTTTATCGA  
TTCATCTGTGATGGACATCTGTGCTCTTCCCATAGTTTGACTATTGTGG  
GCATTGCTGCTATGAACATTGGGGTGCAGGTGCCCCCTCAGATCAGAGAA  
GCGTATTCTTAATCTGCTTTACCTATTTTTACCCAAAATGAAATCTTACCA  
TTGGCAATGATGTGAATGGAAGTGGAGTGTATCATGCTAAGCAAAATAAG  
TCAATCAGAGAAAGATAATTATCATATAATTTCCACTTGTGGAATTTAAG  
AAACCAAATGAGGAGAATAGGGGAAAGGAGGGAAAAATAAAACAAGAAG  
AAATCAGAGGAGACAAACCATAAGAGATTTTTTTTTAAATATTTAATTTAT  
TTATTTGAAAGACGGGGGAGAGAGTATGAGTAAAGCACATGAAAGAGGGA  
AAGGGAGAAGCAGACTCCCCATTGGCCAGGGAGCCCCAGCGTTGGGCTCC  
ATCCCAGGATCCCGGATCATGACCCGAGCCGAGGACAGACACTTAGCTGA  
CTGAGCCACCCAGGCACCTGGAAAGATGCTTAATCATAGGAAACAACTG  
AAGGTTGCTTGAGGGACAGTGGGTGAAGAGATGGGGTACCTGGGTGATAG  
GCATTGAAGAGGGCACGTGATATAATGAGCACTGGGTGTTATATACAAC  
GATAAATCACTGAACTCTACCTCTGAACTAAGAATATGTTATATGTTAG  
TTAATTGAATTTATTTTTTTAATTAATTGAATTTAAATAAAGAAAACATA  
GACACTTTTACTTGATATTTTTGATTGACACTCTTTGGATATTGCAAGT  
CATCCAGATATAAATTTACTTAATAAACATCATTCTGTATAAATGTCTCC  
ACCTTATTAAGTACATGAACAACACTGAGATATTTTGTGACTAAAATG  
ACTCTGTGTATAGTTACCCGACGTGGATTTTTATTTCACTAAAATGTAA  
ATGAAATTTCTTCCCATGGTTTATTTTTTAGGACTCATGTGAACCTAGAG  
TGCTGATCACACATTTCTGTCTATAAACCATGTTTCACGATGCATTCTA  
GAGTTTTTCAAAAAGGAGACATTCTGATTCTAACATACATTTATTTGAAA  
TTATCCAGTGTCTCTTTGAAGTCAAGAAAAATTTTATGTCTCCTCTTCTT  
CATGATTCTAAAGATTTCTGATGATTGCCTTGAGATCATTTCTTTGTATA  
ATTTATCTCGTTCACATATTTCTAGAAATCACTCATGCAAAAATTATTTG  
ATTTCTGTTTTCTGACTTGAATATAGGCTCCAGTGGGTGCAAAGTTCCT  
CCATTTGAGAACCACCGGTGTACATTTTTCTTGTATGCATATAGAAAATT  
TCTGGAAGAATACATAAGAACTAAGTGATTGCTTCTCCTGATAAAAAAT  
AACTTTTATACCATGTGAAGATTCTACTCCATATGTGTATAATTTTAAAA  
CAATCATAACCATATCTGTAATGTACATTCTCAGGTCCTTCTGGTCTGTA  
AGTACTCTTTAAATACCTTTCACAGTGTGTAAATTTTTCTTTGCCCTTA  
GATTATATCTCTTACTTTTTAATAATTTCTTTTTCTTTTAAATCTTGCGA  
GAGAACTCAAGGCTGCCACATTGATTTCTTTAGTTTCCGTGTCATCCT  
CCATTATTGGGATTGGTTCCGTGGATAAGGGTTTCTTTCTTTGGAACTC  
TCTAGGGCTCTCTAGGATTCTCTCTCTCTACCCCAATTATTGCTCATT  
ACTAGATCTCAAATCTGGGATTATACCCATATATCCACAAAGCTTTTAAA  
ATGGACTTTTGTAAAGTTTGCTTTACTTATTTCAGATATCCATTGCTTCTT  
GCAGCTCTAGACCTGAATGGTTTAACCAAAATGCCATTTAGCTGGCACA  
GTGGAGCTTCCAGCTGGCGACAGTCAGAAAATAGCAGTTTCTACTTAGAA  
CAGAACCTGGCAGCTGGGGAAATCCCAGAGTAGCAATCCTCCTTTCTAAAA  
ATGGTTCTGATATTCCCTTTAAAACATACAGTATATTTTTATTTAGAAAA  
TATTTATTTAGCTGTCAGAAACACTTCAGCTAATCACTACTCTTTAAAAA  
GGCTGGAGTCTGGTTACACCCTCAGACATCATCAGAGCTCTGGTTTTTCA  
TAAGCAGAGTATAATGAACATAGTTGAAGAAGCCTTTATAGTTTCCCCA  
TGTGGAACCTTTCTTGTCACTACTGTATACACAAGGCAAAGATCTAAATC  
CTTTGCATCTTCTAAGATCCTATTCCCTGCCTTGCTGCACCCCTTATCT  
TTCATGGTAAACAGAGACACGCCCTTCAATAAGGGGAAGTAGAGAAGATCA  
AGGGGAATCAGTGAAGTCAAGTTTAAATCTCCTTATGTACCCAGACTGTGAGA

TTTCAGCACTACAGAGTCAGACATCTCTTAATGGAGGAAATTAGAAAGCC  
CCGATAAGATAAGTAGGGGGAGGTGGTAACTGATTAGCTGTAAGGGCCTT  
AGGAACAGACTGACTATGAGAAAAATCAATGGACTTTTTTGTGTGTGTG  
TTTCTAAGAGGGTTTCAGAGTCAGAGCTAAATCAATAGCTAGGAAGAGAA  
ATCTAGGTTAAGGGAATCCATAATTTTAGTCAATTATGGGGGTCAGACTA  
TGACCTAGCTAATCTTTTTTCTGTTCCCTTCTGCTCTCTTACTTCCTCT  
TCCAGGTGTTGACCTCCTTTTAGAGATTATGTCTTCCAGAATATCCATAT  
TTAATGGATCTACCTGGAATTAGTTTACCTATCCACAATGCAGAAATATA  
CATTCCTCTTTATACTATCATATGCACACATGCAATATCTACGCATGTAT  
ATTTTCTCATCGTTTTTGGCTTTTGTGCACTTTGTGTCTGGGGATTTCGTT  
TACTTGATGGTTTTCTAAGAGTTATTCATTCACATGTGTGTCCAGCATTG  
AATCCCCTTTCTTTTCAGCTCTCCTGCCACTCAGCAAAGATTTTCTTGTC  
TTTGCTCCCTCATAAGAGCCTCTGCTCCACCACTGTGTGTGGCCACGTAT  
GCATACTTACAATGCCACGGCCACTGCAGGACACAACACTTACAACATTT  
TTCACCTACTGAAATTCCCTATATAACGTTGGTCAGATAATAATAAGATG  
ATCCTAGTGGTGTGCGATCACTAAATCCAATGGGATAAACTCACTCATGCC  
CCCGTCCATGGACTTTTTCAATAGCCCCCTCAAACCTCATTCCCTATCTCAC  
ATAGGAAATGTCTGCAAACTTAAACCTAGATTGGAATACGAAAGAGCAG  
TGTAATCCTGTTTTGATTTAATAGCATGGACATAGAACATAAATTTGGTT  
TTCGTGGAAATGAAGACCCAAAAGATTTAGGTCTGTGAAGGACTTAGTTT  
ATAGCTCATCTAATCTAGCCCTTTAATTTAAGGTTGACTGCATTATCATT  
TTGCATGTGGGCATGAATTTGCTGAATAATGTTGTCATTATTATTTTGTA  
ATTCCCAGGAAAAAAAAGTGAATTTGTCCATCTCAGTAGAGAAATTTATA  
TTATTTACATTTGTCAACTCCTGAAGATTTGTTAACATATCAGAGGCCGG  
CCTAGGTAAACGCTTCTGAAGAAAGAGCTCTTTGACATTTGCAAAAGTTG  
TTTTATGTGAGACTCCATTATGCTCAGGCTGAGCTGATTTTAACTAGGA  
AGAAATGCTGTCTCGATCCCTTCTCAACTTAGGACTTCTCAGAGTTAGAT  
GAGCCTGTTATAAAGCTCAGAAATTTTTTTTCCCTTCTTTTACAAAGTAAG  
TTGACTGAAGCTGTTGGTAATGAAATGAGTAATCCAAATAGTTTATCTAG  
TTTGCTGTATTGGCTACTTTGAAGTATTATATAACTTCTTGGAATCTG  
GAAAAGTGATACAAAGGGAAATGTTGGCTAGCCAATGTTAATATTTGTTT  
AAAACAGTGAGTCATATAAACTGGGATTTCTCTTTGGGCTCCTTATTAC  
TGGCATATTGTCTGAGTCTCAGTATAAATTTGATGCAATAATCCTTGTTA  
GAATGTGGAGGAATGCTTTGTTGAGTTAATGGGAGACCTCTACTTTTGA  
TATTCCTGTTGGAGAGTGAGTTACTTTGGTTGCATTTGGAAAATTAGTA  
ATCTCATCAATGGTGACCTGGTAAGGTTGCTTGTGTTTTGCTTTTTCTTCCT  
TCTCCATGACATGTGTCCATAGACTGGCTCACCTGCAGTTCTTCTAAGAA  
ACAGCCACTTGTCTGCCTTTCTCATACTGACCATTTTACTCAGAAGGA  
AGTTCAGAGAGGGAAACCTTCAGTTAGAAGAGGCTTAGGTGCTAACAGATT  
TGAATACCATGTAAGAAAACAAAAATTAATAAATTTCTTTCTTACAGAC  
AAAATATGTACTCTATTTCTTTGGGCTTACTCTTTTATGATTCCGAGGAT  
TTCTTCAGGTTCTAGAGATGATAAAGTGCCATATTATATATAATGCTACC  
TACTTATAAGATTTTTTAAATTAATTAATTTATTTGAGAGTGTGTGCACA  
TGAGAGAGAGAGAGAGAGAGAGAGAGAGAGAGCGCGCACAGGGGGAGA  
GAGAGAAGTAGACTCCCTGCTGAGCAGGGAGCCCCACTTCCGGCTGGATC  
CCAGGACTCTGGGATCATGACCTGAGCCAAAGGCAGATGCTTAATGGACA  
GAGCCACCCAGGCAGCCCTACCTATAATATTAACCTATTTATGAAGTAAG  
TCACATAGAAGCAACTTGGTCACATTTCTATTCTGTGGACAACGCGAAGA  
AAAGAACCTGTCTCCTATGAGAATTGAATATGACATTATAGCTAAGTCAT  
CTAAATAAGAGACCTGACACAGAGAAAATAAAGCACACATTTATAATG  
GCATAGTTTTATAATTTATAAATAAATTTATATTGTGAAGTTAAAAGTCA  
ATGTGTCAGAGCACCTGAGTGGGTAAGTGGTTGAGCATTTGCCTTCAGCT  
CAGGTTGTGATCCTGGAGTCCTGGGATCGAGTCTGACATCAGGTTCCCTG  
GAGACAGCCTGTTTTCTCCTTCTGCCTATGTCTCTGCTTCTCTCTGTGT  
CTCTACTGAATTTATATATATACTGAATTTTATATATATACTGAATAT  
ACATATATGTGTGTGTGTATATATATATGTATATATATATATACACACAC  
ACACATATATATATATATATATATATAGTTTTCTTTTAAATAAAAGTCAA  
TGTGCTCCTGTGGAAAAGAGTATGGAGGTTCCCTCAAAACAATTTCTTTTC

CTATATAGTTCTCTCTATATATAGAATTACCATATGATCTAACAATTCCT  
AGATAAATATCAATAGAATTGATAACAGAGGTTCAAAGAGATATTTATAC  
AACCTGTTCATAGAGCTGTTATCCACATAGCTAAAAAGTGGAAATGACT  
CAAATGACCATCAGTGGATGAGTAGATAAACAAAATGTGGTCTATATATA  
CAGTGTAATATTATTCAGCCTTACAGAGGAATAAAATTTCTGACATATGCT  
AGGACATGAATGAACCTTGAAGACATTCTGCTAAGTGAAATAAACAGGC  
ATAAAAGGACAAATATTATGTGGTTCCTTACATGTGGTACCCAGAGTA  
GTCAAATTCATAGAAACAGAAAGTAGAATGGTGGTTAGCTAGAACTGGAG  
GAAGGAAAATGAAGAGTTAGTGTTTTCATGTGTACAGAGTTTCTGTTTGGA  
AAGATGAAAAGTTCCAGAGGTGGCTGGTGGTGATGGTGGCATGACAGTGT  
AAATGTACTAAATGCCACAGAACTGTCCACTTAAAACGGTTAAGTGGTA  
CATTTTATGTTATATATGTTTTATTACAATAAAAAATAAATTTTTCTAAAT  
AGTCAATGTGTTAGTCGTTTTGTAAGTGAAAAAGTTTATTCTAACCTAAGT  
GAGCTCCTCATATATCTCACACTTTTCATCATGATTATGGTGATGAAATT  
ATTGGTTATTACTTCCTTTTCATTTCTTCCTTGTAAGACTGTAGAAATAT  
GATGTTGGTGGAGGGACAGTGCATGAGGACAGCTGATGAAGGGTCACGTG  
CTAATGGTGGAAATGGTGGAAAGAGTCGTAATTAGATAATGTAATTTAGGAA  
GATATCTTTGAAAAATGATATGTTAGCATACCTAAAAGAAATGAAGGTT  
TATATTTGCAAATATCTAAAGGAAGAAGACTCCAGAGGCAAGGAACAGCA  
AAGAGAAAGTCCTTGAGGAAAAGAGTAAGCTTGATATGTTCAAGAATGGA  
AAGAAGACCAGGGTTTTTTGGAGCAGTCACCAAGGGAGAAATGGTTGGGG  
AAGACTGGGAAGTGTTCAACAGGAGCTAGATTGGGTAAAAACTTGAAGGC  
TGTGAGATAGATCTTACTTGGATTCTATTCTAAATGCAATGGAAAAATT  
TAGATCTTATTCTAAATCCAGTGGAGGGCATTAGAGAGAATTACAGAGGA  
CAGAGAGGATCTGATTTATATGCTTGGTAGATCACCTAAGGGCATTTTTG  
AACAGAGTGACTGGTAACAAAGTCAAATGCCTTTTTATGTTATTCCCAC  
CTCCTCTTAAATGTATTTCAGTAGGAATCACCTTGCCCCGGTCCTGGATG  
AAAACTCTGGCAGACCTGCAACATTTCTGCTCACTCTTCGTAATACACA  
ATTCTGTAATGACTCTAAATTGCAAACAGAGTTTCAGTTCAGGAGAGTGT  
CCAGCCCTGTGCAACAATCCAAATCCTGAATTTGATTTAGTCCTCATTTT  
TCTCCTCTCCCCTGGTCAGGCTGGCACTCTCTGGGAAGCCTGCCTGCATT  
GGAAACAGGGTCTAACTGACTTCCCTCCTTGCCACGACAGCCCCCTCTAC  
ATGGTTCTTGTGGGTGGATGAGACTGGGCTGGCTGGCTTTGCATTCCCTG  
GGCCAAAACATGATTAAAACAGAACTTCTCTCATGAGATGCTGTGGT  
GGGCTATGTTTCCTGTATTTCCCTTTGACTGGGATATTTAAGTCTCTATT  
CCTGTGGACCACTAAACATTCTCGATAGGCTTCTGGGCACCCAGAAGTAC  
AAATCCAGACCCTTCTGTGTAAGTTCTTGTCTTCTTGGCAGCTTTAC  
TGGACAGGGAGCAAAGGTATCCCTTTACCCAGCATCCTCCTCAATCCTCT  
TCCTGTGCGATTCTTTCTTGATCAGAATGGGTAAGAGAGATTCAAGATAA  
TTGGAAAAAGTTATGGAGGATTTCTTTTGTAAAACCACATGTGAGGATTT  
GCCTGACACTTGCTTTGGTACCTAATATTGATGTTTCAACAAAACCTGGGG  
CAAAGCAACATCAATTTCTTACATCACGTCACATGACTCCAACCACTGTG  
TGAAGGATGCTCTGCAGCAGGACAAGAGAGGAAGGATTGAGAACAGGTGG  
GTGACAGTAGCAGTCCAGGTGAGACACAAAGGCTGTGCAGAAGGAGGGTG  
TTGATGAGCAGGAGGGTTAAGATGTCTTGAGGATGGAGTTGCAAGAACT  
TCTGATTGATTTGGCTCTTGGGGATTCTGAGAAATGAAGGCAGACTTTGA  
ACTTTAGGCCCAAGCCAGTGAGCAGAGAGAGGTGCCATTCTCTGAGAAGC  
ATGAGACTTGCAGAATATTGCATCTAGGGTGTGGATAGGGGTATGTGAAA  
GGAAGATTTATGATTGAATTATTCTGTTCTGTGTATTTAAGTTTTAGAG  
TTGGATTTATGAGTCTGGAGTTCAAGGAGGGTTCAGGACTAGAGCCATAT  
ATTTTGAACCTCATCAGCAGATAGAAGATTTTAAATCCATGGGATTGAATG  
AGATTACTTAGGGAAGAAAGCATATGTAGTGAAGCATAGATATTCTATAG  
CTGAGCCCTTTTGATTCTAAAAATTTAAGAGTTTGATAGGAAGAAGAGTAG  
TGAAGGACACAGAGTGAGAAGATGTGTTTGGTGGGATGAATGGAGTTACA  
CAGAAGTGTGGTGTGTGGAGCTGTCCAGAGTCTAGTAAGAAGAAGCCAG  
ATGATTGGTTTTCTGGATTTGACAAGTGGGAGTTGTTGGTGATCTCGACAA  
GAGTAGTTTCATTGGAGTAGTAGAAGCAAAAATATGATGGGAGTGGCGTA  
AAGAGATTAAGAAATTGAGAAAAAGGAAGGAAGGAGAAAAGGAAATTGG

GGGTGAAAGGGAAGGGAGAAGAGAGAGGGGGTAGGAGGAGGGACAAGGAG  
AGATCACAGTGTATACTGAGTAGGTGGCAAATTTTATAAGCTTTTTTCTC  
TATTTTATGAATATCTCTCATAAAAATACTAAATAAGAAAAGTAAAAAAG  
AATAACTCACTGATCTGTAGAGTCTTTGCTTCTGGTTGATACAAATGAA  
GTTCCATTGCATTGTGAATACTTTTGGCATTCTTAGTGAAAGCAAACAAA  
AATTACGGAAGAAAAAAGTTGGCAAATGATTTCAAGTCTTCGCTGAAT  
AAAGACTTGTTTTGTTTGTGCTTTTTTAAAGAAAAAAGTAATCAATAGAGC  
TACATAACTATTAGAATAGTGACGATCCAAAACACAACACCAAATGCTGA  
TGAGGCTGTGAAGAAATGAGGGCTCTTGTTCACTGCTGGTGGGAATGCAA  
AAATGTTATAACTATTTGGGAAGACAGTTTGGTGGTTTCTTACAAAACCTG  
ACCATACTCTTATCATATGATCCAGTACTCTGATATTTCAACTTCATATG  
TGGGTACAAAAACCTGCACGTGGATGTTTATAGCAGCTTTATTCATAATT  
CCCCAACTGGGAATCAACCAAGATATCCTTCAGTAGATGAATGGATAAG  
TAAACTTTTGGAACATCCAGACAATGAAATTCTACTCAGTGCTAAAAATAA  
ATGAGCTATCAAGTTATGAAAAGACATGGTGGAAACATAAATACATATCA  
CTAAGTGAAAGGAGCCAGTCTGAAAAAACTACATATTCTCTGATTCTAAC  
TATACAGCATTCTGGAAAAAGGTGAAACTCTGGAGAGAGTAAAAAGATTGA  
TGGTTGCTGGGGGTAACGGGGGAGGGAAGAAAAAGCAGGGCATATTGGAT  
TTTTAGGGTAGTGAGGCCATTCTATACGATACTATAGTGATGGATGCATG  
TCATTATATGTTTGTCAAAACCCATAGAATGTACAAGACCAAGAGTGATC  
CCTAATGTAAATTATGGAGGTTGCGTGACAATAATGTGTCAGGGTAGGTT  
CATTGATTGTAAACAAATGCATCAGTGTGGTGTGGGATGTTTATAGTGAAG  
GAGGCTGCGTGTGAGGAGCAGAGGGGGTACTTGGAAACTCCGTACTTTCA  
TTTCAATTTTGTGTGGCCTGAAAACCTGCTTTTTTAAAAAAATAAAGTCT  
ATTAAAAATAATTAGTACTATTTAAATAGTAAGAGGTTTTAGCAGATATT  
CAGATTTCTGAAATTTATTCCATTCTTTTGGTATTGCCAAATTTTATAG  
GTGAAAGAACCATGCACTGTCCAACAATTTTCATTAATAATGATTCATTTT  
TTTTTACTTAAATTTAGTGATTTGAACATACATCAAGCCCTAGTGCAGAA  
AACCTTTTCCTTTTCAACCAACTTTCTCAATCATGCAACACTGACACATA  
ATCAGAATTGTCACAATTAATTACTTAGAGATGGAGTATTTGCAGTCATT  
AAAAATGATGATGTGCAATCTTTTGAATATGGGAAGTAACATTAAATAA  
AAACATACAGAAAATAAAGGAATAACTGTTGCTGTAAAGATGTACAAAAC  
CGGACAATAGTTTGCAAAAAAATAAAAAATCTATATTAGAATGGTGAATTT  
TTTTCCCTTCTGTGTTCCAAAACAATGAACCTTATTATATAGATTTTTTT  
ATAGCAGATTTTTTCCCCCAATAGAATGTCTTGTTTTGTTACACATAGTT  
GGTTTTGTTTTTCAATTGGAAAGTACTTTTAGTCACTCTCTGGTTAATAAGG  
AGTCAATTGCTATGAAAAATGGAGATACCTGTAAGTTTCCTCAGTGCAC  
AAAAATACTTTTTTCCTCATTGGCAGATTTGTTGTTCCCTCATACTGTCTA  
CTCTAAGATAACTGTTCACTGATCAATCCTGTTTATTTCTATGAAACAGA  
AAAACCAGGGTGTAATTTTGTGCTCAGTGATTCAAAAACCTGGCTTAAGC  
ATTGCATCCAGTATTTAAAGCTCATTGCCTGGTATGTTTTCTCTGGAAA  
TGAATTTAACTGATAAGACTCCTAACTCTGGGAAACGAACTAGGGGTGG  
TGGAAGGGGAGGTGGGCGGGGGGTGGGGGTGACTGGGTGACGGGCACTGA  
GGTGGGCACTTGATGGGATGAGCACTGGGTATTATTCTATGTGTTGGCAA  
ATTGAACACCAATAAAAAATAAATTTATAAAAAAATAAAAAATAAATAAG  
AAAATAAAATAAAATTTGTGTAACATTTGAAATCAATCAACTTGTCAAGC  
TCCCTCCTTAGTGGGGAGCCTGCTTCTCCCTGCACCCCTGCTCATCTCT  
CTCTCTCCTGCTATTTCCTCTCTCTCTCAATAAATAAATAAATCTTTTT  
AAAAAGAAAAAATAAAAAACAGATACTACACTTGATCTTAGCCAAAA  
GGCCGAGAAGCGATCTGGAAATGAATTTATATCCCAAGTACTCTGGGGAA  
ATCACTTTCCCTATGGGAGAAAGAAAAGGATAATGCAGGTGAACTTTTGAG  
TCCTTATTGGGTCTTTCAAGCCTCTGTAGTACTTGTCCCCTCCACCTCTC  
AGAATTAGGTGGTTTTCTTCCCTTTATTTTCTCTGCTCGGGCTTTGCTGA  
TATGCTTTGCTTTTCCTCAAATGTGTCTCATTCTAGTCCCTCAAGGCCTAG  
ATTCTGTTCCAACCTGCCTGGAAGACACCCCTCCAGCCATTGTGTTGACTA  
AACAGTCTTCTGGTAAAAACCAAGCTCTTAAATAAGTTTTCCAGTCCAC  
ATTGCAGCCAATTGTTGTCAATTTTCAATGTCTGTTTTAAGATTTAAGCT  
CTCTTGGGCAGCCCGGGTGAAGTCAAGCGCCCTTCAGCCAGGGCCTGATCC

TGGAGACCTGGGATCGAGTCACACGTCGGGCTCCCTGCAGGGAGCCTGCT  
TCTCCCTTTGCCTGTGTCTCTGCCTCTCTCTCTGTCTCTCATGAATAA  
ATAAATAACATCTTAAAAAACAACAAAGCTCTCTTGAGGCTGGC  
ATTCTTCTCTTTAATGCGGCTCACTGCGTTTCCAAGTCCCCCTGCATGAT  
GCCTGGTCCATAGTAGGTGCTCATAAAGAGATGTCCTGTAAATAGCTAGC  
ACTGAGCACTCGGAATGCTTCCCTGGAGAGGTACAGCAGGAGAACGGAT  
CTGTTCAACATTGTTTTCCCATTACTTACGCACAGGATTTTTGTAGCTGGA  
CTCCATCACACATGCGTTGAAAATTAAAGTAGTTTTCTTAACATTTGCTA  
TTTGAAATCAAGATGTAAACTGACACTTTACCAAAGCTTCTCTTTTAAAA  
AGTTGTTTTCCAGCTAGAATTTTCTTCATGAATTGTCCATGGCTGAATCT  
AATAAAAAATAATTTATCTATTTTGGAGTTCAGCTTATAAAAGTTTCTGGA  
ATCCGACAGATTTTAGCTATTTCTTGAATAGTACAGATGTCTTGCTTAAA  
AAAAAAAAAATTACAACACCATATGTTCTCTGTTCCCATGAGTAGGTTTC  
AGGGAAGTTTTAATAGTTAAAGTAGGTTTTTCTTTCTTTTGAAACCTAG  
CATGTGGATTTAGTGCTTATTAAAGTGAGAGACTGAGTGTAAGTGGTTTTGA  
TTTAGGATTAGAAACGGGAGCTGGACTAAAAGCTTACTTCCATCGCTGTG  
CCAAGAACCCTCCCTTGAACAAGTCTCGTACTCACTGCGGATTGTGGGGA  
CAGCCCCTACACGCATTGTTTTCCAACCTTTTACCATTTGGTCACTGAGGC  
ACAGCTCCCATCATCAACTCTCTTCAAGAAGGCTGTGTTTGAGTGCTATG  
CCATAAAGGGCCTATTTAAAAAGATGGATATGTTTACTATTTGAATCCTTC  
ATTCTCTTTCCATGACACACACCCTTTCATTTTTAAAAATTCACACTGTG  
TGGCAGAGTACAGCTACCTCTTAAACACATAAACCACATAGCCACAGTCT  
TGCTGTTGCGCAAACAAACCTATGTGTGAAGTCTGACGGTGCCTGGCCAC  
TCCATGTCAATTAAGACAACACCTCCCCTTACCCCCCAAAAAAAAAATAT  
TAAGGAAAATATTGCACTCACTGTTTTTGTATGACATAAGCAATTATTAAC  
CAGAGGTGAAACAGTTTTTCCAGAATGTAAAAAGTATATTTAGAGGGAATG  
CAAAAAAATAGTATTGATATCTGATCTCCTGGTACTGTTGGGCAAAACT  
ACCTAAGGGTACAATATCTAAATAAGACGTAGGTGAGGCCAGGGCTCTGC  
AGCTACAGTGAGGACTTGGTCAATGGGATGCTCATACTCCCCTCCTGGGT  
ATAAACATGAAGGGGGAGGATTCAGGCTCCAGAAAGAACTTAACACTTG  
GTACATCATTTCAAACCAGGAGTAACTATGTGCTCATGGGCCAAATGTG  
GCCCACCACCTGTATTTATAAATAAAGAACCACACTCATCTATTTATGAA  
TCATCTATGGCTGATTTTGCCTACGGTGGCAGAGGTGAGTAGTTGTGAC  
AGAGACTATATGATCCTCCGAGCTGAAAATGTTTTTTCTGGATCTTTAT  
AGGAAAAGTTTATTGACCTCAATTCTAAACCAAGAAGGGCCAGTCTTTCA  
AACTGTAATCTCAGGTCATTGAACCTTAGTTTCCTGTTACAGGGGTAAAA  
AAAAAGTAGTAGTAGCTCATACGAGGTAAAGTGGGATGAGGAAGCCTTTC  
AAAATGTTTTAAAGTGAGAAGCATAGGTATGGAGACTGTGGTAATCACTC  
CAATGACCTAAAAATTGTCCACAGATCATCCCTGGTATATATAGGGATC  
AACAAAGAGGCTAGGTTAGCTGGTACATGGGGTATGAACTGTGAAAAAC  
TAAGACAAGGTTAAATAAATATGTCAAGTGGGTCAAGATGGCTTTTGCCCA  
CTCATCCTTTTGATCCCTCTTTTAGTCTTGGACTATGTTACCAACCAAT  
CAGGATTCATTTCCGTTACCTGGTAACAAGTTGGGGCCAATGCTCTTCAA  
AGTATACTAGTTGCCCTGCCAGAGGTATCAGAGGCATTTTGACTTTTAAAA  
TTTTGCTGCTTAGGGATTGCCTAGGATTTTATATAATAGTCTGGGAGTCC  
TTTCTGGCAATGTATGGATGTATGTATGTTTATATGCATACGTGTATATA  
TGTATCTACCTATCCACAAAGTATTTTTTAAAAATAGTCTATTTGTATTAT  
ATAAATATAATAAATAAATAAATTCATAAATAAGACTATTAAATATTAGAT  
ATCCGACACCTTTTAAATAATGTATATAATTTGTGTTTCTTAAAAAATC  
TATATGGTTTTCATAGGAAAACTTCTAGATACTAGAGACACTTTATGTTT  
ATATTCCAAGAAGATATTGCACAATGATTTTAAATATCTTTAAATTGGTCG  
ATCAAAATCTTTTCTGTTCAATGTGAACAAGAATGATAAAAGATAGTGA  
AAAGAGGGGTGCCATTTATTGATTATAGGTAAATTATTTAGATGTCATTA  
GTTTCAGTCTCCCCCCCCATATGAAATGGGTATAAATTATAGTACCTAACT  
CAGCATAAGTGTAATGAATAAGTGAATAATGCAAGTAACGTGCTTAAAC  
AGACTAAATTAACATTTTTTATTATAATCATCAGGCCACTTTCACAACCTC  
TCTAAAGTTCAGCCATATGACAAGAAAAAGAACATCAGGATATTTGCCAC  
GTAATTGTGCGTCAGTCTAAATGGAACATTTCCACCAAAAGTGAAAATA

CCCCAGTCTGGCATTCTCTGGGTTGGGAAGGAAAAACAATCATTGT  
CAAAGACACTGTTTTATGAGGATTTAACTGGGAACAAATTGAATTTGTGG  
CTTGGTCAAGGAGAGAAATATTTGCAAACATCTCAGGGATGGCAGTGAT  
ATATCCACATTGTCGTTGGTAGCAATTTAAAATTGATAACATTATGCTGC  
CATGTATTTTTGAGAAGATGGTGGTATTTGAGGACAATAAACCCAGTTT  
TCCTAGTACATTCATTTCTTTTCTGAAATGTTGAGAGCATGTTAACTCT  
GAGTGCCATGTGGGTAATTCTTTCTCTACAAAATTAAGTAGCACACATCA  
GTAAACTCTGATTTTTTTTTCCCCCTGCCTCAGGTTTGAAGCCTGAATGA  
TCTTCCCGAAGGCTTCAATCCAATGTTCTATCAAGCTTGGTTTTAAGTAA  
AGAACAACATAACCAGTATATGTCAAGAATGAAAATGAAAATATTCTTTA  
TTTTGTTTATTTTCATAAAGTATGTTGATATGAGAAAAATATACTTTTTAA  
AAAATAAGATTTGTGCTTCATTATTAGTGAAATGCATACCCTTGGGCCT  
AAATTGAACAAAGTTTTATAATCATCCTAGTCAAGTTCAAATGAAGGTTG  
CCCATGGGAATGACATCTAAGGTGGATCTTAATTTACTGGAACCTGATTTT  
CTCAGGCCTTTTTGTTCTCATGATATTCAGTGTATGGTTAATTCACAGTGA  
TTGGACAACATAATTTTTGAAATAATCCATCACACTCATGTGCACCAGG  
ATATACTTGAAATGCATAGGGCACTTCCTAGAAAAAACAAAAGATGTTT  
TGTACAGACCACATCTGAATAGATGTCAATTTTGATATTCATCCAACCTAG  
ATCAAACAGCGTTGCTCATTTCTACTAAACACTTGAAGACCATCATTTTT  
GCTTTTTAAGAAAAAGCATAAAAATAATCTTTAATATATAAATATATAAG  
TGATGTTGGCTATGATAGATCTGGCTCATCTGAAAGGAGAAAGAATCCTA  
TATGCTTTGAGAGAATTCTCTAAAGGAAACCAGGAACTCATGTCAATAAT  
CACTATAAAGTGAGATTGTGATATTTCCCTTCATGGGTCACTTGGAAATTT  
CCCAGTTAACTTTTGAAGTCAGTATATTTCTGTTATATGCTATTTGTTTT  
TTGACATTAATAACTTTTATCATCATTAATAAGAAATAGATTAGAATTAT  
GTAGGATTTCTCCAAATCACCTTATAGGTTTTGGTTTACAGGTAATGAAA  
AGCAATGAAAAAACCTGGTTTGGTTGTTGGTACTAAAGATATACATCTA  
CATAAGTATAGCAATAGCAAAACTTCACTGTCTGTCAAAACGTTTTTCTT  
TCCTTTGTTAGTGGTCCTTCTTTTGGGAGATTTGAAGACTCCTGGATATT  
TTTAAATTAATAAATTATCTGTTTGGAAAACAGTCTGGCACCTTCTTAAAA  
AGTTAAATATAAATTCATAAATGTATCATGTGATCAAGCAGTTCCACTAT  
TAGGTATATACTGAAGTAAATGAAAACATATATCCCCACAAGAACTTCT  
ACAAAAGTAAATAGCACTATTCAAATAGCCTCAAACTAGAAACAGTCCA  
AATGTCCATCAATTGCTGGCATACCCATATGATGGAATACTAGCTAATAA  
TAAAAAGGTACAAGCTACTGATACATGTCAACAATATGGATGAACTCAG  
AATAATTATGTTATATTTCGTTTAAAGATCAGGAACAAAAACAAAGGTGCAGG  
GTTCCCACTCTTGTTACTTCTATTAACATAGCACTGAAAGCCTTAGCCAG  
AGCAATTAAGCAAGAAAAAAAACAGTATCCAAATCAAAAAAGAAGTAAAA  
TTATCTGTTTGCAAAACGCATATTATATACAAAAAAATCTAACAATCTTA  
CCAAAAGAAGACCCCGACAACCTTAGAACAGATAAATTCAATAAAGTTGCA  
AGATACAAAATCAAATACAAAATCAGTTGTGTTTCTATACACTAACAAT  
GAACTCTAAAAAAATTTTAAAGGAAATAATCCCCTTACAATAACATCAA  
AAAGAATAAAATAATTAGGAATAGATTTAACCAGGAGATAAAATATATG  
TAACTGAAAATTATAAGACATTGATAAAAGAAGTTGAAGAAGACACAAA  
GCAATAGAAAGATATCTTATGTTTACAGATTAGAAAAAATAATATGTTAA  
AATGTCCGTACTATTCAAAATGACCTAAGATCCAATGTAATCCTGTCAA  
ATTCCAACAGAAATTTTACAGAAGTAGGAAAAAAATTTCTAAAATTTGTA  
TGGAACCATGAAAGACCCAGATAACTAAAGCAGTCTTGAGTATGGAAAT  
CAGAGCTGGGGGCATCTGTTTCTGATTTCAAACCTATATTACAAAGCTA  
TAGTATTAACATGAAAACAGAAATAGACACATAGATCAATGTTACAGAATA  
GTGAGCCCAGAAATGAATCCACACATATATGGTCAACTAATTTTTTGATAA  
AAGCACCAAGAATAATGGGAATGGATAGTCTCTTCAATAAATGGTCATGG  
TAAACTGGATAGCCACATGAAAAAGAATGAAATTGGACCCTTATCTTAT  
CCAACACAAAAATTGCTCAGAAATAGATTGAAGACATACATTTAAGAACTG  
AAACTATAAAATTTCCATAAGAAAACATGGAAGGTTGGTCTTGGCAATGA  
GTTTTTGGATTTGTGAGCAGATACAAAGGTGACCAAAGCAAGCTGGACTA  
CATCAAGCTAAAAAGTTTCTGTAAACAAATGAAACAGTCAACAAAATAGA  
CAAATGGAAAGGCAACCTATGGAATGAGAGAAAATATTTGCAAAATGTAT

ATCCAATAAGGAGTTAATATACAAGATATATAAAGTAAACTTAGAACCCA  
ATAGCAAAAAAATACAAATAACCTGATTTTAAAATGGAAAAGAACAAT  
TAAAAATTTTTCCAAAGAGTGCAAACAAATTGCCAACAGGTATACTGAAA  
GATGCTTATATTACTAATCATCAGGGAAATGAAAATCAAAACCATAACAA  
GATAGCATCTCACACCTCTTAGGATGCCTGTTATCAAAACGATAAATATT  
GCTGAGGATGTGGAGAAAAGAGAAATATGACTTCTGTTCTAAAAGAACAC  
CTTATTTGGAAAAATAGGAAACCATTAAGAAGTACCACAAGGATTTTTGT  
AATTCTAAAAGAAATATAGACAAGTAAGTTCCTCAAGAGTCCAAAGGATG  
AAAGGCATTGCAAATGGCAAGAATAATTCATAAGGAAGCAAGATTTGTAA  
AAAAAAAAAAAAAAAAAAAAAAAAAATTGTGGCACTGAAATATAAGTGAAG  
GCTCCTCCCCCGCCCCCATGGAGAGGGAAAACCAAGTCAAAGCCAAAT  
CGGAGGTGGGAGCAAAGTATGTGTTGGCACAAGTAAAACCCAGTTCACAA  
TGAAGGGGGCGAAAATTAACAGAGCTCCTTCAAGTTTCATGGGAAACAGG  
AAGTCAAGTAAGATTCAAGAGTCATAAGACAAATGAGATTTATTAGATAG  
AGTATGTGGTGGTGACCACAGTCAATTTGTGGATGGGAGACTGGAAAAAG  
AAAGATCAAACAGGAACGTATTGCAAAAGAAAGTAACTGCTTTTGACTCA  
GTGGGAACCAAAAGAAAAGCAGTCATAAACATTTTTTCAGATAAAGAAAA  
GATGAGGTAAATAGTCATTTTTTTCACATCAATTTATGATTGACAATGTTT  
TTCTCACTTTGTGAGATAGGAACCTGACAGATGAGAAAATAAATATTA  
GAAAGTCATGTGTTTGCCCAACATTACACATAGTTGAGAAGAACATACTT  
TGTGACACCAATCTGGGGAAAGTGTGTTTTGTACCTGGACTTGTAAAAC  
CGAAGACCTCTAGGAATCGACCTGATGATATAAATGGGTGAGGTAGATAA  
GGTAAAAGAGAAAAAATAATGATGTAAACATGATGGGAAATGATAACTG  
ACATTGGCCTTATTATTGCCTGGGGTTAATAGAAAGTAGTAGAGACTTTG  
GGAAATACTTCACCTTGAAGGGAGGTCACCAGCATACTTCAAAGGAGAA  
AATTTGAACTTTCAGTTACCAAAACCAAAATGCAGGAGCCAATTTTGATT  
CTTCAATTTTTCTCTTACCCTACAGCCAAATCCTGCACACTCTATCCAGA  
CTCTATCCAGAATGTTGTCACTTCAAATATGTCTCCAAGATGTTCTTTCAA  
AGCTCACTTTTGATTATCTAGAATTCTCAGACTTTCTTTTGCAGTTTTTC  
AAAAGATACCTTTACAAAAATTAATAAATAACATATAAAAAATGCCAAG  
TGTAGATTGGGAGAAAACATTTTCATTATATGAATTTGAAAAGAAGCTTA  
TAACTAGAATTTAAAAAATCCTATAACTCAATAATAATAATGAAAGATA  
ATTCCGTTAAAAATACAGCCAAAGATTTGAACAGATACTTCACACTGAAG  
ATACCCTATAGCCAAAAGCACACCAAAAGGCTCATTAGGGAAATGCAAAT  
TAAACCACACTGAGATACCACCACCACAACATCAAAATGACAATTTCGT  
TAGCTTGGGAAAACATTTGCAATTCATGTTTATCATCTGCTTCTGTGTG  
ATAAATCATGATAAATTCAGCAGTTTGCAGACAACATAATCTCATAATTT  
TGTGTGTCAGGGTTTGTAGCATGGCTCAGCTGGGGCTTCTGCTTTAGAAT  
CTCTCACAATGCAACAAATCAAGATTTTCAGCCAGAGCTGGAATATCATCC  
GAAGGTTGGACGTGGAAGGGACCTTCTTCCAAGCTCACATGGTGATTGGC  
AGAATTGAATTCTTCCAGGGAAGTTGGATTAAGGGCCCTGACCTTTCTTA  
GTTCTTGAGTGTAGACCTCTCCAACATGACAGCTTGCTTCAGCAAATTA  
TGCATGCCAACAAATACAATCTTATGTAACCTAAACTCAGTAGTGACATAT  
CATTTTTCTCTCTGCTAATTAGAAATAAGCCACAGGTCTCATCTACCAGC  
ACCGCACCCAAGAGGAGATTATGCAAAGGTGTGAGTACAAAGAAGTGGGG  
ATCATTGACAACATGTCCTAGGAGCTACCTATCAAGCATGTGTCTGACAAA  
GACTGTGTAGAATATTAATGAATTTCTATAATTGAATAATATATATATAT  
GACTCAGTTAAAAATATGGGGAATAGACTTAAGTAGACCTTATCAAAAGA  
TGCTCTGATAGCTAACATGTATATGAAAAGTGCTCTGCTTCATTAGTCATC  
TGAAAATTCAAATTAAGACCAAGAGATCCCACTACACACCCACCAGA  
ATGGCTAAATTTAAGCTGCTGACAATACCAACTATTGTCAAGGAGGTAGA  
GTGACCGGGATTCTCTTATTGCTCGTGGGAGTGTAATAAGGTCCAACCA  
CATTGGAACCATGTTGGTAATATCTAATAAAATTAACACACACCTACG  
TATGACAACACATTACGCCAAGACATTTCTTCTCTCAGAATGTGTCCAC  
ACACACATGCGTGTGCATACCCACCCCCCACACACAAGCGCTTTATT  
AATAATAGCCCCAACTAGAAAAATACCAAAAGCCCTTCAATAGAAGAATA  
TAATAAAAAAGTAGTATATTTATAGGAATCACTACACAGCAGTTTTTTTT

TAATTTTTATTTATTTATGATAGTCACAGAGAGAGAGAGAGGGGCAGAGA  
CACAGGCAGAGGGAGAAGCAGGCTCCATTCCCCGGGAGCCCGACATGGGA  
TTCGATCCTGGGTCTCCAGGATCGCGCCCTGGGCCAAAGGCAGGCACTAA  
ACCTCTGCACCACCCAGGGTTCCCTACACAGCAGTTTTTTAAAAAGGACA  
AGCTACTGACACAACAACACGAATGAATCTCAAAAATATTGTTTGATCAA  
AGGAGGCCAGAAATAAACAGAAATTCATCTTGAATTATTCTATTTTTATG  
AAATTCAAGAAGACCTAAATTAGCATATAATGATCGAAGTCAGCAAAATT  
GTCATTTCTGGGAGGGGGTCGAGAGAGCTGTTTTTGATTGAGAAGGAGCA  
TGTGGAAATGTTCCAGATACGATGGACACGTTTTCTATATTCCTCTGGGT  
GGTGGCTGCGCATCTTCTTGATGCTCGTTTTAGCTCAATAAATTCGAGA  
GAGAAGAACACAGAAACACTTTGATGTGATGTGCATTCCAATCACTTGGG  
GATCTCATTAAAAATTGCAATTCTTTTTTAGTAGACCTGACGGACACTGGA  
GATTCTGTGTCACTAGCCACATCCAGGTGCTGCTGCTCTGAGGCAGGCAG  
CACTGCTTTCCCTGTGTCTCCCTCTTCTTCTTCTGTCCAGACTCTTAGAG  
TCTAGAGATCCACTAGTTGAGTTTTCTACAGAATGACTCTCTTTTATCT  
TCTGCTGTGTGTTTGCCTGTGTTTGGTGGTTTGGACCAGAATTCAGAAGG  
CCAATAACGCAGTGTTTTTGAGCAGCTGAGAGAACCTCCCAATCCAGAGG  
ATATTGGGGGGATCAGAATGAAAGCCGGTCTTAGTGAAAGCCCCAGGGTG  
GATCCTCTTTGACTCGCTCAGTAGGACCAAAAGAGGATGAGGTAAGTGA  
AAAAGACTTAACAAAGGCTGGTCTACTAAGTGAGGAAATGATAATCTGTG  
GCTCACTCAGCTCCGTGTGATGAATCCAGACCTGAAGTTTTCCAGACAGT  
CACACCTATATATTTTTTAAACCTGGTAATCTATTCTAGGGCCACAGAAG  
GTCAGCTTGGGTGCCAGTAGCATTTACAGCTTGTAACCGGGCTGTGAAG  
AGTAAATCAAAAACCTGATAAATGATAGATATGTCGTTAGTCAGGCCAAA  
TTAGAGATCGAAAACGTGATTAGTTGATGCTTGGAATTCATTGCTCAG  
ATCCTTCTTTGAACAGCAGAACTCTGATCTTTGATGGTTTATTTAACTT  
AATACCTTGGGCCTCTTATATGAATAAGCCGCTTTTGCAATAGCTGAGG  
ATTCTCCTAGGGTGATGTGATTACTCCTTAGTATAAACTAACAAAATGAG  
CTCATGTAACAAAATAATCTGTCGTGCTTGAATTTGAACAAAATCTATCT  
GCTAGGCAAATTATGAGATAACAAAATTCGAAGAAAAGATGTTTGCTAGA  
TAATTTAACACAATGAAAGCAGTTTGTTATAGTAAATGTATGAAGATTT  
GGATCAGACTTGCCAGATATAAAATTTGGGCAAGTTACCTGTTAATAAAA  
TGGAGATAATATCTATCCCAATATTTTTAATTAAGGCAATGTCTATAA  
AGCATGAATTGTAGTGCATAGCATGAGGTAGAAGTACAATAAATTTCAAT  
TCCTTTCTTCCCACCCCTCCTTGATCTAGAACGCTAATCGATAACCATC  
TCTAGTCCCCTGGTATAAGCTCCCTATGAAAAGTACTACACAAAGCATTTA  
ATCAACTTACAATTCTACGAGAAGCTAGGTATCCTTAAATATGATATCTG  
CAAAGTGTCTTTTCCTACTGGTAATCCCAGAAATTGGTTTAAGCTAAAAG  
CAGTCCATGCAACTAAAAGAACAGAGTGCCTGACTGCTATCTTCATTATT  
TATTTATCTGCCTTACTATTAATAAATAATGATTGCAAGAACAAATAATGA  
TTGCAATAAAGGTAAAGTTTCTCTTAGAAAATAAACAAGCCACATTTAA  
TAGTGAGGATTTGTTCACTCTTGGGGAGAGTTCGTTGAAAAAGAAATTAC  
CCTTTCTGGTCATATTTGCTTCTTTTCTTTCTTTCTTTCTTTCTTTCTT  
TCTTTCTTTCTTTCTTTCTTTCTTTCTTTCTTTCTTTCTTTCTTTCTT  
ACTGTCTGCCCTCCACTGCCACCACTCTGCACAGCACTGGGAATGTTAG  
AACCAGGCCAGAGGGAGGATGCAATCGACCTGCCTCCCCCACAGAAACC  
ACCTTCCATATACATAGTTACTAAAAGTAAAATAAAAAACAAAAGTCTAG  
AATTAACTGCAATATAGATGCTCAGCAATTCTAAGAAGTTTTACAGCGT  
TAGAAGGAGAGAAGATAGAGTGGCCAGAGCAACCAATGGATGATAGTGAG  
GGAGCAAGGGAGAGGTGGGGGTTATTGTCCTCAAATGGAGAGGCAGTCA  
GAGGAAGAGAGGGCTAAGTTTAGAGACTAGGATGTCTGGAGAGTGGAATT  
GCTACTTGTCCAGATATGTCATTACTTTTTTTTTTTAATAATATATTTTTT  
TCTTGTTTACAAATATGTTAAAGTTTTTGTGTCAGAATTTAAGACAATGC  
CATGACCGTCAAAAATTTTACGTACTTTTTGTTCCCGTATTTTATGTCAG  
TCAGGGTCGTGGCAGGAAACAGAAGACACATTCAAATTAGGAAAAGTAAA  
TCGGGGGTCACTTACAAAGGAACTAATCACAGTTGACCCCAAACAGTCAA  
AAACCCGTGTATAACTTTGACTCCCCAACTTGGCTGCTAATAGCCTA  
GCATTGACTAGAAGCCTTACCGATAACATAAACAGTCAATTAACACATAT

TTTGTGTGTTATGTGTATTGTACACTGTCTTATTACGATAAAGTAAGCTA  
GAAAAAAGAAAATCTTATTAAGAAAATCATAAGAAAGAGAAACGACATGT  
ACCATACTGTATCGTGTGTTTGTGGAAAAAATACGCACACACACGGACCAG  
CATAATTCAAACCCATGCTGTTCAAGGGTCAACTACACAAAGGTGTCACT  
GAATGTAGGGGAGCCACTTGACAAAAACCCAGGGTTACCAGTGAAGGGCT  
GTTGCTGAAGGAGGTTAGGGGAAATGTTCCAGAAACCAGGAGGAGAGAG  
TTATTTAGAAAAGGATGCCTTGTGAGAAGCAGTAAGCCCTCGGATCTTCA  
GGAACACAGCCACCTTAATATGCTGTGTACAGGGACAGAGTCAGGATTA  
TACATTTCCCTGGGCTTCCCTTCCCTTATTTTGTCCAGTCTTTTATGTGGCT  
TCTCCATTGATTAAACCTAATAGTAAGTCAGACGAAATGAGAGCCCTTTA  
ATGTCACCTGTGAGTTTAGGGAGTCCCCAATAAGTGAGGGTGGTCTTGGA  
TTCAATAATTTGCTAGAAAGGCCAGTCGACCTCCACAAAAGTTAATATATT  
CATGATTTGGGTTTTATTACAGTGAAGGAAACAGGTCAAATCTAAAGGGA  
AGAGATGCATAAAGCTGATCCAGGAGGAACCAGGCATAAGCTTCCTGTTG  
TCCTCACCCAGTGGAGTCATTTGGACAATATTTATTTCTCCCAGCAACAG  
TGTGTGACAATACACACAGAATGTTGCCAACCATGGAAGCTCACCCAAGC  
TTGGCGTCCAGAGTTTTATTGAGGGTTGGTCACTTAGACAAGGCTGACTG  
CCTGTATGATTAGTCTCTGGCCCCCTGCAGAGGGTGAGCTGACTCCACGTG  
GCCTAAGCACCCCTCCCCCAATAAATCTCATTGTTACACAGACTGCTGGA  
ATTCCTCAACACCTCCAGGTAAACAAAGTCACCCATTTTAGACAAGACAT  
TCTAAGGGCTTAGAGTTTAGCTCCCAAGATCTGAGGGCAAAGGGCCAAAC  
CTTTTGTGTGTGGGGGTGCAAGGTGTATTATTTACTACACATACCCACAT  
AGCTTAGCAGGAATGGCTATATAATTTGTGGGGCCAGTGCAAAATGAAA  
ATCGGGGGACACCTGTTCAAAAAATTTTTACAAATTTCAAGATGGTGCCTC  
GGGAGTGTTAAACCAAGCACGGGGCCCTTCTGAACATGGTAACATGGAAA  
ACTGTGTAGGCCACATACCCATGAAGTAAGCCTTGCAAGGTCAGTTCAGAT  
TATTTGCTAAGTGGGCATACCTGCCCTGATTCTTATGGTACCAGGTGCCG  
GGGGGATTTAGAGGTTGAAAAAACCACCCCTTGCTCTTGAGGCATTTT  
TAGTCTATTAGGTTGGAAAGTCTATCCACAGACAGCTGTAATACAAGCT  
AATAGTCCATGTATCTTTAAGAAGATATAGGAAAATGCTCTTGGAATTTA  
GGAAGCTTTGAAAATGTTCCAGCTGGAATTATCAACGTGGTTTTTGC AAC  
AATCCAGGAGATAATGTTTATGAAACCAGGTTGAAAAATATATATATATT  
TACACGTGCTAGATACACCCATTTGGTAAATAACCACCTGAGTTTATAGA  
ATCCTTTTTGCTGCCATCGGCCCTATTATTAGAAAAAAGTGAGATCCTGA  
AAGGAATGTGCTGTTTTGCTTGCAAAGGGCAAGCCAGATAATCAAATGGG  
AAGCGTACACGTTCAAGGAACAATAGGACCGGTGTAAGACTATCTATCTG  
ATGACTCTTACCTACAAATTCAGTCCCCCTCTTAAGTAAGCAAAAAAAAA  
AAAAAAAAAAAAAAAAAGAGGATGTTTTCTGTACAAAAACTGTGTGTGCG  
TGTATGTTGACTGAATAGATTATTTCAAATAGTTGTTGGGCATTCCCGC  
TACCTTCATCATTGCACACAGTCAGATAGATAACCTGGAGAAACACAGAA  
TGATAGGTTGAGATGAAACAAAACATTTCAACAGGTAAAGTCCATTGGTG  
CATTTCTGTGCACGTAGGGAAAAATTTAAAGCCCCAATGTATGCGAAGATT  
GGGTATAGTGGAACTGGTCTCCTTCCAGATGACATCTGCTAAAGAAAATT  
TGATTCCCCAGGCATTCCCTAAGAGCAACTCAATCATATATCCTTCCTGA  
CAAATTCTAAGATCATAGTCAAATATGATACTAGAGGAGGTCTTTGAGAC  
AATACCCCCCAACACATACACATATTGGAGATGTGGCTTGAGGCGATCA  
GAGCCTCCTAACCCCTTCCTCTGTCCCTTGAAATGTAGGAGACCCCCACC  
CTACCTCATAGCTGGAGCCATTTTCTAGGACGGCGATGTGTCTAGACCCT  
CAGGAGTGTAGACACGTTGGACCCCTGCCAGGCCTCTATATATAAACATTT  
AAGATTCTTGCAGTGGGTGCAGAGGTCTGCTTGTCTTGTGCCACCCAGGA  
CGGGCCTTGGAAGTAAGCTCCCTTGGTTCTTAAGCCCACCACCTGCCTGT  
CTGGAGTGGCCCGCCTGTGTCTCCTGTCTCTCCTGGCCCACTATGTATGG  
GGCCAGTTTCAGATTTTCATCCAGGGAAGTCCCGAGGCCGTGAACCAACAG  
AGGAAAACCCACAGCCAGAGAGAACAGATATATGTCCCAAGACATACCA  
AGTTGAGCGGTTGTTGATAAATAGTGACTGGAGATTAATAATTAAACCTT  
TTAATAGCAAATAGATGGGTCCCACAAGAAGAGTGAATTACTCATTAGGA  
GGCAATCCACATGCCCTGAATGTGGGAAAGAAAACCCCAACTGATC  
TGATCTGTCAACCTCTGGGTTGTTCTTTTGTTTAATCCATATTACTTTTA

TAACCTCTTACTTTTTCTCCACCTTCAGGTTAATGAAGTTACCGTTGCCTCC  
AGGATTAAGGGGACATGTTTTCTCTAATAAATCAAAGATCATCAGGTAAA  
ACAACCTTATAGGATTTCTTTTCAGTATGAAAGAAAGAAAAAAAAAAAAA  
GGAAGTAGCCTAGAAAGTAGGGTGTTTTGACAAAGCCAATTAGGAATTCT  
TGAATTTAGAAGTTGCATTGCACCTTGACCTGTTTAAAATGATCTTTTATC  
TTAAAGGATAATGTTGTGACATTGAATTTTAAACAATTAACCTCTTACAG  
GGCCTGGCAAGGCACCCATTGTAACAGTACAATATTCACCTGTTTGCAC  
AATTTTATTTAAAAAGGAAAAAGAAAAAAAAAAAAAGATGTAAGAGGCATCC  
AAAAAAAAAAAAAAAAAAGACATACAACATGACATGTCCAGAGCTCTAT  
AATCTCAGGTTTTTTGAAAGCCAATAATTCTAATGAAGCCATTTAGTATTT  
ATGTTTATATTTTAGTTTTATAACTGGATTTGGCTACAGTATGTGAGATA  
CTTTTTTAAACAGATTTTGCAAGAGTTTCTATCAGTAGGATTGCATTTGTT  
GTTGTTGTTTTGCTTGTTGTTTTGTTTTCTTTTTTTCTTTTTTTTTCTTTT  
CTTGCTCTTATGGGTTTTAGCATGCTTCTGGGGCCCTGTGGGTTCATATG  
AATTTTTTAGAAAACCTTTTTCAAGAGATCTGAGAAATGATAGTGAATAGC  
CAGTTATGGAATTAGTTCAACTACCAGGGAGAAAAGGTGAAAATAGTTCT  
GGTCTTTACCAAGAATAAGAGTTACCATTAAAAAAAAAAAAAGAAAGAAA  
GAAAAAGAAAAAAAAAAGTGACACTTGAATTTTACCTTCTTGAGGAAGAG  
ATTTTAATCCTTAGATATTTGCTCCACACACTCATACATATACAAAATAA  
AGATTAAAAAAAATCTTTAGATCTCCATCTAAGAAAATTAACCAAAGCA  
AAGCATTTTAAATGTTTCACTATGTGTATCCAAATTAGTTGTAGATGAATT  
CTGGACAAGCTGCAATATATTCAACTTTTATAAATTGCCGATACATTAA  
TGTTTTATAAATTAAACTGTATTTATGTTGCCAGAGCAAACTTACTTTTT  
AGCATGACATATACATATATCTATAATATAAAATTACAATATAAACATAT  
ATATTTATAAAACAAAATTTAATTTCAATTGGATATATACTCAATTTTGT  
TTTCTCAGATACTTCTTAAAAAGGACATTTTTCTATGCATAAGGTAAGAT  
GCATTTTCTATGCGTTTTTCTATGAATAAGGTAAGAATCCCCAAATTCA  
ATATAACACTTGCCAGCATGGTGCACCTAATTCTGTAAAATGATATGTAC  
TTCTGAAATTCAGTCTTTCCCTGAATGTATTTCTCTTCATTTATTAAATG  
TAGCCAGTGGCCCCCAAATGGAAGCTGTGACCTTGGAGGTTAAACATC  
GCGTCATTTGGCTTATTTGACTTATTATCTCCTCCTTGACAAAGTTTTTA  
CTATACAATCCTGTTTCCTCCTCCCTCACTGTGGTAGATCAGTTGCATTCA  
TGGTAAAGTACAGTGCCCTTAATTCTGATCGGGGGCTGGCCATGTGAGCT  
GCTTTCACCGAAGAAAGTATTGGAGTCATGACAAGGCAAGCAGAGACTTG  
AAATGACGCTTGACATCTCCACTTGTGTTCTTGTACCTCCTCCATTGAC  
ATGAGAAATTTTTTCCAAGCGAGAGGAGGAGACATTTGTGGAACAGAGCCA  
GCTTGCCCCAGCTGTGGCCATCCCAGATCAGCCAACAGTCAGCTCAGCCC  
AAAACATAGAAAGCCCAGTCAGGATCGGCAGAGGCATCTAGCCAACCACG  
CCAGACTAGTGAGCAATAAACACTTATTATTGCATCCCACTGAGGTTTTG  
TGATTGTTTATGATGGAGCATTATCATGGCAATAGATCCCTCCATTGCTG  
ATATACTCACCCAAGGCACCGTTTCAAGAACTGATTGTACTTGCAACCT  
AGGCAGCTTGGCCAATACCTGATATCGTTGAGTGATCTGAGACTTTGGAG  
AGGTAGCGTTACCTCTCAGAGCCTTGATTTCTTATCTGTGAAATAAAAT  
TATCAAACCACATCAGCTTCATGGTCGCTTAACATCTGTGTTATTTGATT  
GGTTGATTGATTTTAAAAGTGATGACTTCTTTTAAAGGTACCTTTAGATG  
TCTTTTGCAAAAATAAATTTATAGTTCTATGTGGCTGGCCCAGTGCTGGA  
CTATGAGGGGTGATTTTGTTTTCTTTCCATTAAACCTTACCTACATAGAAC  
TCCCCACCCCAATGTCCAGTATCTCCCTCTGCCTCTCATAGCAGAGGCA  
ACATTAGTGGTGGTTAAAGCTTGCTACCTCCAAGCCAAAAAGTCTTCTT  
CATAGCCCAGCCCTACAATTTAGGGTTGTGTAAACGTGGGGAGTCATGTC  
GGGTCTCACTGTCTTCATTTAGGTAATGCTGGTACTTACCTCAGTGGTTTG  
CTTTAAAACAGTGAATGAGCTCATCTGTTTAACTTAATACATATATTAAG  
AATTTAGAATGGTGCCTGGCACACCTAATATTACTACACTTTGACTATTG  
GAATAATGATCCTTGCACTTCTTCTGCCTCAGAGATTTTGGTTAAAAACT  
AAAAATAGTGTCTGAGTAGAAAAAGTGGGCATTTTTTTTTATAGGACTGCC  
TTTAGAAGAGTATAACCAACATCAGTGGCTTGTTTCATCAGGAATGGTGC  
TGTGAGGCATAAATAAATGTGCATACTAGTGTTACCCATGTTAGAAGCGT  
CCATAATGGATTCTGAAAGAACCAGGGTCAAATCCTGCCCGTGTCAAGGA

GGCAGTCTAATGGAAGCCAAAAGAAGAGTGTAGATCAGAAGTCCGAAGAG  
CTAGATTTTGGTTTTTACTGTTTCTAGTTGAGTATTTATTTCTTCTTTGCT  
GTTCTTGGTTACATCTCTTAGGAATTTACAGTGGCCTCTGATGTGGCTTC  
TGATAGGGCACCTAACCTCTTTGAGCCTCAGTGCCATCTTCCATAAAAGT  
AGAAATAACTGAGCCACTGGAAAAACCCTGTTGGGCTACTTACTGATAAG  
ATACTCCAAACTGCGAGCCCTATGCTTCTTAAATTTAGCATATCGGGAAT  
CATTTGGGTCTGGGCCAAGATGCAGCTGGTCAGGGAGTCCAATTTGGTCT  
GTCTATAGAGTGGAGTTGGGGAATCTGCATTTTTTAACAAGATTATTAGTA  
TGTGGTCTGTGGACCACACCTTGAGACCCATTTTCGTTGCTTCCCTTCTCT  
GCTAATTGGGATGATGAATAACATCTGCCATTCTCTGTGTGCCATGGCGT  
CATGGGTGTGCAGAGATGATGTGTGAGAAGGAGGTGCTTTGTGTGCAGTA  
AAACCCCAAGAACTTTTCATTATTGTTAAGTAAACACTTAATGCTTCAGAA  
CTCCCGGATCCTACTTGCCTCTTGGTCTGCAGAATCTTGATTCTCCAGG  
TCTCCACACCAGGACTTTAGGAATGTTCTTAAGGGAGGAGTCGGGAGCTG  
ATGGATGTGTTCTCTGGTTGCTGGGAAGTGGGGGGGTGGCTATGTGGAAA  
AGAGACAAAAGGTGACACCCCAAGAAACCTTTTTATTTTTTGCCACTGG  
GCCTGTGCTTGGCCTCCCCCCCCCCCCCCCCACCATCTCTCAGCTCACAGC  
TCTCCTTTTAGGTAAGGACGGCCCCCTTGCTAGAGGTCCCCCAGCATGCT  
TCCAGATCCCTGGGGGCTTTGCATTTCTTGCTTGGCAACAGGGAAAGAG  
GACTGAAAGGTCAACCTCGGCCTTCCAGCCTGCGACCCCTTCATCTGAGAT  
CGCCAAGCAGCCAGTGTGTTGCCCTGTGAAAACCAGTCTGTTTTAATTGA  
GGGATGAAGCAATTAATAAATACTCCATAAAAAATGGTGACTCGGGCCCTTC  
GTGGCTTAATTGCCGTTGACAAAGGCCCATCGGGACCTGGATGGGGCTTG  
GGTGAGGATGCCTGAAGCCCTCTGCTTCTCTCTGAACTCTCCCTCTGTCC  
TCTCCCCAGCAGTTCCCTTCCAAGCTCCCCCTTGGCCTTCAACTTGATGGC  
CCCTCATGGCATCACATTCTCTGTGTCTGGCTCTTCTCTTCTCTCTGTCT  
TCTGTCTCAGCTGCTCTGAGAGTCCCTGGGCCGGGCTGCCCCCTCCC  
CCTCCCCCTCCCCTCCCTCCTCCTTCCCTCTCCCTCCCCTCCCCTAC  
CCCCTTGCTCTCAGAGCTCCCCACCGATTTTATGAGTCCCCTGGCAGCTC  
TGCAGTTTATTGAAGGGTGAGGGAGGGCAAGTCCACCCCTGGGTGGGGA  
GGGGGTGGTGGTTTCCCTCCGTGGGGTTCCTCCAGCCATCGCAGAAGGGGCA  
GACAGCTTTCTGGCTCCTGTCTGTCTGAATCCCAATCAGAAAGCCCTGTGC  
TGCTGTGGGTGTCTAAAAGCCACCTTTGGGCAAAAAGGATAATAAAAACG  
TTCAGTCAGACGTTTCGAGGCAGCGTTCCAAGCTGCTAGCTGCCAATTCCC  
CAGTTAAGAGAGGCCTGGCTCCAAGCCTGGCAGATTAAACCCCTTCCCCTC  
CAGCTCTCCATGGACATCTTGAGCCCCTGATGCCCAGGACGGGGAGGAGG  
AGAGACAGAGATGGAGAGACAAGGGAGGGAGAGACAGAGGGGGTGGGAGG  
CGCTGCAAGGAAGGAGGACTTGGGGATGAATCCAGATTTCAATGTTGCAA  
AGTTTTCTTCCATTTGGACAGCTCGCCCTTCAATAAATAAGATGTTGTGA  
AGAGAGGGTGGTCAATGTGTTTGAAGAAAAACATTGAAGGGTGCGACTC  
AGCTTTCCCTGGCTTTTTTAACAGCCATGAACGCCTTGATATTTTTGGCTT  
GGATATATATGTGAATGTGTGTGTGTGAGAGAGAGGTTTTTTTTTCTTTT  
CTTTTCTTTTTTTTTTTTTTTTTTCTTTTTTAAAAATATGAGGTATTAGGCT  
CTCTCCCAAAGCACATTCAAGGGAGGCTGCCTGTAAGCCACACTCCTCTA  
TTAGGGCAATGTGTCTTGCAAAAAAAAAAAAAAAAAAAAAAAGGATTA  
AAAAAAAAAGAGGAAGGAAGGAAGGAGACTCCCTCTTGATGACACAGTCAC  
CTACATCCTGATGGCATTACTCCTCGTGGTCTGTCTAGCTCACTTTC  
CAGCCCTAGCTACTTGGGTGCTCATGTTTAAAGTGCTCATATCTCAGAGG  
TAGCTTCATTCCATTGCGAATACTCCACATCACAGAGCTAATGAATCC  
AGGTCAAAAGAGGTGGAAGATGAGGCCAAAAGACGAGCAGACCTTAGCA  
CCCCATCATGCTCCATTTGCTTTGTGCATCTGCCCAATGGCTTGAGTTTG  
AATCTTAGCTCTGTTAAGTTTAGCTTTCTGATGGGCTAAAGGAGAACAGT  
AGGGTCTGTTTCATAGAGTTGGGGCAAAAACCAATGAAACAATCCTTGC  
TAAGTTCTTTTAAAGTACTAGATACAAAGTAGTGCTGAAAAGTACTTGGT  
ATCATTTATTAATTATTACTTGTATTACGATCATTATTATTATCATGATT  
CTTACCATAATGTTTCTGAGGCCCTTCAGGGGCTCCTTGCTAAAGAATGG  
AGTTAACAGTTTTACACCAAGACATCGTTGCTTTCTATCTTGAAAGGCT  
GCATCCAAGCCCAATCTTCTAGAATCCCTACTGTGTTCTATCAAATTCCC

TAGACACCAGTGATCAGAGAAGGACCTGACTAGCGTTTGAAACATTTTCT  
GAAAAAAAAAAAAAAAAAGACACAGATCAGAAAGGAAGAAATAAACATTTT  
TTATTCACAAATAACATTAATTTGTGTCTAGAAAATCCAAAAGTAATCTA  
TAGTTAACTGCTGGAATTAATAAATGAATTTCACTACGTTATTGTAAAA  
AAAAAATTTCTGCTTTTCAGTGAATCAATTTCACTCTGCTTATGGAGGAAG  
CCGTCAACTGAGATTTTCATGCAATCTTAGTAAAATCTCTGCTCTGGTTA  
AACTTAGCTAATTAGTACCCATCTCAGCTACTGTGGCTAAATTTGAGCTC  
TCAGAGGAAACCATATCAGTGCACAAATATAAGTCTTGAGGTGCCCCCA  
CAGAAGAACACAAGAATATTAATAATTTGAGTGGAATAATGGTGGAAT  
AAGAGGGTCTGTATGAATTGGATTAAATTATTCTAACATAAATAACCTG  
AAATCAGCAGAACAACCTGTGCAGCAGTATCTTAACCTGATTTATCTAAA  
GAATAAAAAATATTAAGGATCTCCCTCCTATCTCATCCTTAGGTAATTAAA  
AATTTTAATGGAAATCTAATGTATGATATTTCTCTTTTATCCTCTACCAG  
CCCAGGGACCTCGGGCCATAATTGAATTAACCGAGATCAGTGTTTTGCT  
TCTCTTCTTGCTTCTAAGGCAATGTCCTTGGTTTTTCTTAACATATACTT  
ATCTTCTCGATTTCATCTGTTTTATAAGAAAAATGGTGATTTGATGCAGAC  
ATCTCTACTTAGATGTCGTTCTTCCTGATTTTCCATTTGTACATGTACAA  
GAGTTTTTCAGTACACATAGCACCCCTGTCTGATGAAACGCTTGATTATAG  
AAGTGGAAGTACCTAACACCAAATTGAAAATAAAAAAGGTGTTTGCTGCA  
GAAGCTTCCAGTCTCATATTCTTGCCAACTCTCTAGGAACAGAGCATTT  
TCTTGAAAATGTAGTTGTTAAAAAATAAAAAATGTAGTTGTTTACCT  
TGAAGAGTGCATTCCCTGGCCTGCCTTGAACCTAGGTAATTCTATATAAT  
GAGGTTTTTCACCAATGAACTATAAGCATAATTTCTTTCCCCCTTCAAAT  
GTAATGAGTATATCCTGCTTCTCTGTGTTCTCCTTCTCGATGTCTGGAAT  
ATGGTACAATGGCTGGATCTCCAGCACACATCTTCAGTGCATTCTGAGCA  
TGCATGTTCCAATGATCTATTAGTGTATAATAAACTTTGCCAACTCAGT  
AATGTGAAATTACAGCTATTTTATAATACTGGAGGAATCCAGGGCTCAGG  
AATTTAGACAGAGCACAGTGGGGATGGTGTGTTTCGGCTCTGTGAAGCTT  
CACAGTGTCTGGGACCTCAGCTGTGAAGGCTCAAGTGACTGAGCACTGGG  
GTGACCTGCAGCCTTCTTTAATCAAATGTCCAGTACCAAGGATCATCTGG  
GACAGTCAACCAGAGGACCTACTCACAGCCTTTTGAGTGCTCATGCTTCT  
CACAGTGTAGGATTGGATTCTAATAGTAGATGTTCCAAAACAAAACAAAC  
AAACAAAAAACAGGCAAAGGTGCATGGGCTTTGCTGACCTAACTTTAGAA  
GTTATACAGCATCCCCACTGCTCCGGGTGACTGCTTACCCGATGGCTCAG  
TTTAAAGGGGAGAGGTAAGAAAAAATAAAAAATAAAAAATAAAGGG  
GAGAGGTAATAAATAAATAAATAAATAAATAAATAAATAAATAAATAA  
AAAAAATAAAGGGGAGAGGTAACTTTTCTCCACTCCTTTCTCAGAGATCA  
GCAAGGTCATATTGCCTAAGAATGTGTGGTTAATTGGATCACATGTTGTG  
ACTATCATTTGGAAATTTCAATCTGCCACCAGGATGGAATGAAATGATAGC  
AATATGGCTCTCCAGTATCTCAGTAGTCACCGTAACTGCTGTAGACTGCC  
AACTCAGATTTGTTTGATGGGTTGGTTGGGTTTTTTTGGTGAGAGAAATG  
GCCACTTATCCTGCTGAAAATACTGCTAGTTTGATTTTATGTAATATGTA  
GTCAAATCAAATATTAACAATTGTCAGTGACCTCAGATTTTACCACATTG  
GTAGCTCATCCATGTACCAGGATCAGTTTAAACATCTACTACTACTAAGT  
CAGCAGGAAAAGCTCAACGTCAAATCCCTTGACGTCATGAGACTAATAGC  
ATTCTCTTTTGCTTCATTTATTTCAGTTTCTTTTTTATTTTCTGCTATTTA  
TCTTAGAGGAGAGCAGTGACCTCTGGGCTGAAATGGCATGGTGGTATTTT  
CCATCCAGTGGTGTTGTGATGGCGTACCAGCACGTTTTATCCCATTTTT  
GGAGCTGGAACAATCTAACTTGTATAGAAAAAGCCTTCATGGGTTTTTG  
TTGGCATAGGAGAAGTCTAATTACACACATTCAAATACACAAGAGAGAAA  
TGGAAGGTTTTTCCCCCTTACTTGAAAAGTTGGTGGTTTTTGACCTGCA  
GTACTTGAATGAGAGATCCAGGCTAATTATGGGATTGCATGTTTAAACAG  
TTACTTCTTTTACAGAATACTCATAGCACATTTGTATGCTCAGTTTTCTTT  
TGGACCTGTGATTTTCATGGACTTTCTGCACAGAATTCTTTCAATTCAAG  
AAGGCATATTAGATTTATTTATCAGTGGTGCCTCATTAATTATATGGCCA  
TGTTCTTAAAAGATCGTTCTACATTTTATTTTCTAGTTTGTTTTATCTGT  
TTTATTCTCTGCTCATAAACATAATCCAGTTCTATATTTGATTCTCCTGC  
TACATCTCCCTTATGTATTGCATGAGGTCTGACATCTGCTTTGTTTCATT

[illegible]

GTGATCTGAGGAGTGCCTACTTCTTACAAGGCCTCGATTGTGTGAAAATG  
CCAAAAGAGAAACAAATGCAGGTTAATTGCGTCGGATGCTTGGTGACTAG  
TTCACAAATCTTTTATTTGTTTTGAGAAGTGCTGCAGTGGCACTAAATTT  
TGTGTGCGTTTCAGGGAGATGCAGACGTAACCTACAGTAGGACCTAGAAGC  
CAGTGTAATTACCTGGGCTCCTGTCAAACCTAATAAACTAATAGAGGCTTT  
AAATAAAAATCGGGAAAGACCAAAGATTTGGGAATCTTAAAGAAAGAGAC  
TAAATGTTGACTCCTGTAAATTTTCTTTATGCATGTGTTTGAGAGGCCA  
ATGGTCCCATGGAATAATGGATTATATATTTCAAATAAAAAAAAAATCTTC  
TAAATCTCTATATAGAATACTGGGGTTTTGGAATCAATGTGCTACTCTTC  
TGTTTTATTCCAGCTTCGTGGAGTTGCAAAGACATCTCCCTGATAAGAA  
AAATATTTTAAATATCATGTTCTGACCACTTCCAGATAACCATGCATTTT  
TTTTAAAGATTTTATTTATTTATTCATGAGGGACACAGACAGAGAGAGAG  
AGGCAGAGACACAGGCAGAGGGAGAAGCAGGCTCCATGCAGGGAGCCTGA  
TGTGGGACTCGATCCCAGGTCTCCAGGATCACGCCCTGGGTGAAGGTGG  
CACTAAACCACTGAGCCACCCGGGCCACCCCTAACCATGCGTGTTTTAAA  
ATGTTGTCTGTCATCCAAAAAGCACACAAAAATCTAAGAGAAGTTAAAA  
GCTATGGATAACTATTA AAAAGAGTCTTTTGCTGATGTAAATATTTGCAG  
AACATTTTCCTTTAGGGAGCAAGAGGTACATTTCTATCTGATAAAATTG  
GCCTCTTATATTTGAAATATATTTAAATTTTTTGGTATGCCACCATCCAA  
CTATGTACTGTTCTACCCATGGTTCCTGAACTATAGACCGTAAGGAAGGC  
CTTCGAGAAATTATAGTCCAGCCTAGGCAGAGGCTGGGTGAAAGACTGAT  
TTGTGCGAGTGGGTACATTTCTCTCAATACATCCAAACACTAACTTTTGA  
TTGCTCCTCTGACTTGTGTTGTCTGTGTCATTAGTAACCCAATGTAGTTA  
CTAAGACCAAATGTGAGTAATTTGTACTGCATAGAATGTAGAATGAGATT  
CTTTAAGCCACTTAAGAACGGATCTGAGATTGGAACCGTAGAATACTTCT  
GTCCTTTATTTTCCTTTTTTAATAATAGCACGATTTAGCCAATCACCCCTT  
GATTCAATAACACGTAAGGGCTTCGTGTGTTCTGGGCAATACGTTGTGTA  
CTGGGAATAAAAATAAGACTGGATGGAGTCCCTTTTCTGAAAAAATTGAT  
GGTTAATAGGAGGCTCTGAGATGTAAATGAATTAATTA AAACACAATGCT  
AAAAGTGATATAAATGAGTAGATGTTCAATAGATAGTGTAATTCAGAGC  
CATATTTCAATCAACCACGGTAGAAATGGGAGATATCATAGGGGAAATGG  
CACAGGGTTGGGTTTTGAGTTACGAGTAAGAGTTTGCCAGAGGAAGAAGG  
GAGGGAAACACATTGAAAAGACATACAAAGTAGCTACGCTTCGCTGAAAG  
AGGCACTCTCTACTATAAAACGCTCTGAACAGAATCACACAGATCAGATT  
GAAATACTACTATTATGTAGCTATAATTTGAGGCAGCTATTTCTTTTTT  
GGCGGCCCTACTTTGGCACAGTATGCTTTTGAGATTACATATTTCTGG  
GTCCTTTTTTTTTTTTTTTTTGTCCTGGAGAATCGTATGTCTCCATATGAA  
TACCCACTGCTATGTACATGGTTATGGCAGCTGCTAAGAAAAAAAATCT  
GTTCAATGAAAGCATGAAAGAATAAATAAAGAATAAATAAACATTATGGA  
TCTCAAAGATTCTATGTTAGGAGGGATGTAGGAACAGCAAAGTATTGGA  
AGCGTGGCTTAGGAGTTGTCTTCAAGCTATTTGCTTAGCAGGTATATGAT  
AGTTTTACAGAGTCCAGCCACACTTTGGCCTTGCCACTGAGATAAGCAAA  
AGACCGAGTAAATAAATAGGCATTAGTTACTTTGCATTTTGAATCTAG  
AATCAGCCCGTCTCAAACCTGTAAGGGAAAGGTTTTGTCAGAAAATTAAGT  
TAAAAAAATAATAAAATAAACAAAAAATAAAGAAAGAATGGTAAGATGG  
CAAATTATAAATGCTGTGTCTTACCATTTACTGGAAAAGTATCTGAAGCC  
CTCTGCTTACTCCCTCACTCTGCGACTGTGCCTGAGACAAATCCGATGTT  
CTTGCTCACTGAGCAGGGAGAGAGGCCGAGCCATCTAGCCAAATTACC  
CAATCTACGGTATACTTGGAATCTCAAATTTTGCCAACGTTGTAAGTGAA  
AATATCCAGGATAAAAGCCATATATAGAAAAGAAGTTTTTCATCCACATT  
TCATGTAATACCATAGATCACGAAAGCAAAAAGAATTTTAAATCTAATT  
TGCTTTACACAAGGGATTGGGAAGCCTGGCAGGATTTTGGGTTCTTCGAG  
TATCTTGAGTTATTTCTCAAATATTTTGGGTTCAATAAAATCCAAATGC  
ATTTTGCCCTGAGCACTTTCCCCCTTAATTTTGAAACCCCTGTGTAATCT  
AAAGGAAATGTAATCCATATGTTTCTGATTCAATTTACACTTAACTCATCA  
AAATATTTTTCTAGGAGCTATTTGATGTTGAAGAAGCATTTGAGACTTT  
TTAATAAGCTTTTTTAAACCTTCCCCCACTCCTTTAAACAGAAGGCCA

TGTTTTGCCAAGGAGAAATAAGCCCCAATACCAAAATATTTGGGTTCAGT  
TCCAAACTCTGAACCACAGAATTTAAGATAGGTTCTCAGCTTATCCAGTT  
TGTTCTTGTATCCCATTTTCTGGGGCTGGTTCAGCATGTAAAATTCAGTA  
GAGTTGCCTAAGATGAAAATGGGACTCCTGTGACTTTACCACAAGATCAA  
GAGGAAGGATTAAAACGTGTGAGCTCACAAGGTTGTGATGTTAATACAAAA  
AAATTAGAAATGACCTCATATGGACCACAGCTTTGGTTCGGGGCAGGGT  
TGGGGGGTGGGGGTGGAACGGGACGAAGAGTTGAAGGAAGTAAACTGTTT  
CATTTAGAATCATAGTCAAGATTACTTAACTACCATATTTTTGTTTTGTT  
TTGGAAGCTTGGCCCCCTGGAAAGTAAAAGTACTCAGTGACTTTTTTCCAA  
CTCTCTCTAATATAAACTCAAATTTCCAAATGAACTTATCTTTGCCACAT  
ACTGGTTCATCTCCTAAATTCTCCACCACCATTCCTTAGTGGCAATGCTTG  
ACAATCTGGAGTTTCATAGCTTCCTGTTTCAGTGCTTACCACGGTTCCGGC  
CCAAGATGCTTTCTGCCTTATTGCCACTTGCTGGTCTCCAACACAACTA  
TGACCTCAGGATAATCAACACTTTGTACTGTTTCCTTAAGCAGATGTTGAC  
TTTGCTGTATTTGCTCATGCCATTCTGGTTGTCTTTAATTCCACTGTATT  
CATATATGGAAGCTTTCTCCGATCACTGGGCAGAGGTGTTGCTTCTTCTA  
ACCGTATCCTTTTGGATTACAGTTTCTCAACTGTGGCAGTGTCTTAACT  
ACTGACATTTTGGATGTGATCGTTATTATCATTATTTTTTTAATCTGGGT  
GTCTTAGCTGTTAGTACGGTGCATTTTACAGTTTAGCATCTCTGCCCTCT  
ACCCACTAGACCTCAACAGCTAAGGTCTCCCTTAGCTAAGGTCTCCCTTA  
CAAAAATATTTTTTATCTCCCATGGTGCCTTCCATGCTTCTGGGCATACA  
GCAAAATGATCATGACTCCCTTGGTCATGGCCTTGGAAAAATGTCTCCGGAT  
TTGCTAAGTGTCTTGGGGCAAGAAGCAAAAGTGTTGCTTGTTGGTTCCA  
TTCTATGGGAAATCATAGATTACTTGTATATGTGTAGATTGCTATATAT  
AATAAACTTCCTGCAGGCAGAGCATCACGCTCAACTTTGTATCTAGAATA  
GTGCATTCTTTGGTGATTTGTGTAATTTTGATTTTGTGGATTCACTAAGT  
ATCTGTTGAATACAAGTGCCAGGGGAAAAAATTACATAGCCCAATTACAT  
GTTCTAACACCTTCAGATCCGATAGTAACTAAATTATGCTGTAAATATCT  
AGGATGTGCCCTTACTCTTCTCTAATCCCTGATTTTGCAGACCCATTATC  
TTAAACCAGACCGCTTCAGGTCTTGGCTATCCTGTAATAACCACTGCTTG  
GCCTTCTTTGCTCTTTGTATCTTCTGCTCTAAGGGAAAGAGAAATAGAAA  
ACATTTCTCTGTCTCCAGGAAGTTAAAATCTAAATGGTTTAGAAAGGCC  
TATGAAAGTATGTAAGTGAAGGTGAAAGAGTAAGATAGATGAGCTCAGTA  
GCGTTGATTGATGGATTTAGCAAAAATGCAAGTTGGCCAGTTAAATTTTA  
ATTTAGATTGAAAAAAAATAGATTTTTATTGGTATAAGTATGTCCCATG  
CACTATTTAGGACATACTTGTGCTGAAATTATTCATTGTTTATCTGAAAC  
TCACATTTAGCTTAGTATCTTATATTTTATCTGACAGCTCTATCAATGTA  
GAAGTTCCAAGAAGGACAGAAACAAGGACATCATAATAGAAGGACAGGAA  
AACTATGGTTTGCTTATAAAAAATTAGAGATGGGCCAGATTTTGGAGGAG  
GCTGTCTACTAGGAAATGACATAAATACAATTGCTTGTAGAGGGTGAAGC  
AGCATAAGAAAAGTTATTGAAAGCCAGCCAGATAAACTTCTATTTGAAGG  
AGACAAACATGGTGGGGAGGTCCCCTGAAAAATGCCTTTTCTCACCTCCC  
ATTCTTACTATCCATTGTTTCTCTTGGGTCTTTTCTCGATAGGAACTGC  
TTTCCACAGCCTCCTATACACCTTGTTCACATCCATACATAAGGTTGTG  
GCAATTGTTTATTACCTGTCTGTTTTCCCTCTTTGATGGTTAGCTGTCATT  
GCCGTTACTACTCTCTACTTTGTCCACTATTGAATCTCTTGCCCTTAGAA  
ACTGAAAGGAATCATCTTTTACATGCTTCAAAAAGTGTTGCCATTTA  
TATAATCCATAGGCGAAGCCTCAACTTCCAAGCCTGGTCTTAGAGACACT  
AATCAGTCGATTTTATCCAGTTTATCCAACCTACCTTCCCACTGAGCTCC  
AACATCTTTCTTCTTCCATAACCAAGCCTGCCTTCGTACTGTCTGCCAC  
TCTCTTTATTTCTTTGCTCCACATTTTTTCCCCTAAGGTTAGGGATTGCT  
TTATTTCCCTCTCCATTAAGCCCAGATTCATCCTTCCCTTGGAATCAAT  
TCCAGCTTCACAAATCAAGAATTTTGGTCATTGGTCAAAGCTGCACCAAT  
GCTCTGAATTCTCGTAGCAACACTATTTAGTTTGAAGCAATACTCTGTTT  
GCTTATACTCTGTCTTAACATTTCTTCCTTGTTTCACGGGTATAATTTTT  
ATCTTTCTAACTAACTATAATATTCGTAACCACAAAAGAGAACTTACAAA  
AATATTTTTTATATCTCCCATGGTGCCTTCCATGCTTCTGGGCATACAGCA  
AATGATCAAGAAGTACTTTTTGGGGTTTAATTGAATTAGCATCCAGAGAAA

ACAATTTAGAAAATAGTATATAATTCATATCAAATGTTTGAAAATTTCTT  
ACAGAAATTTGTAGGAAAGCCTATTTCCAAGATTAACCTTCTTAGTTTT  
TCTGAAAGTCAAAGCATGAAAAATTTCTGAGTATCTCTATGGGATACGGT  
ATTTACAGGTCATGGTTTTATTACACTTAGCCTAAGTGAATAAAATGATA  
ATCACAATTACTGTCTGGAGCACCAACTACATCCTGGACATTGTATTTCA  
GCAGTTTTAAATTTATAATCTCATTTAATCCATATTGGAGATACATACTG  
CAATTTTTCTTTTAAATAAGGAAAGTGAGGATAAAGAAGGTAAAATAAGT  
TGGCCAAAGGCACACGACTGAGAAATAACTGCACTGGGATTAAAACGAAG  
GTTGGTCTGATGCCAATACCTATACTCTTTATCACTCTGCCCTTCTCTTT  
CTGAGCATGGATGACCAAAGGAAAATAGTCAGCTTCTTACTCCTGTGTCT  
AGTTTTCTGGAAGGCCAGTGAGGGAATCATAAAGACAGCTGAGCTCAAGA  
GTTTTTCTGGAAGAATTTCTCATCAATGAGTTTTCTACAAATCCAGCCTTG  
ACGTCTTTTCATGTCCTGTCTGTTTTTCAACAAGATTTTGATGTGGCAAACA  
TTGATTCCACTTGTATTCTCCTTGTCTCACTGCCTTTATTGTTTTTTCC  
AGATTTCTCTCCTCTTGCCTAAACTATGATAATACCTCAGTAACTGGTCT  
GGCCACCTTCGATATCTCCCTATTCAATATATCAACATGTTCTATAAAGA  
ATTATCACATAAATTAGGATAAACTTAAGGCATGGCATTCTGTTGTTAAAA  
ACAAAACCAAACCTTAATGACATCCAGTAAAAACTGGTGAAAAACCAAGAT  
CTAATATCAGATTTTGGGGGTGGTTGCATAGGTCATCTTTTACTGGGGTA  
CATTTTTTGGGGGGGAGCAGTGCTTTTATTTTCATTGTTTCATGTTTAGTTT  
CCCAGAGAATTTAGTACATTGTTGGCACATCGCAAATGCTCAATAAATAT  
TTACCAAGTGAACAAGTACCAGTTGCAAAGCTGGATTGTTTTTGAGATT  
TTTAATACTACCTCTTGGTGACTGAACTGCAGCTTACTGGCGATACAAGC  
CTGAGGTCCAATTAGGTAAGAAATTAATTCATCAAGATCATCTTAATTTT  
TCTGATTGTTTTGAAAGGTATCTATTTGAGAGTCACGGAGATTCTCAGCG  
CTTCAAGGTAATTTGATGGTTCTTCAGAAAACCTGGTAGAAATGACAGAT  
TAATACTTAATATCACATAATTGGCTCCCCTGTGCCCTCACTCTATTTA  
TGGTCTTCCCACAGTTATAATAGCCAGCTATGAATGAGGGGGGGACAAAA  
TTAACCCTGAAAAAGAAAATCACCGATCTTTTGAAAATACCCAATTTTAA  
ATGAAATTCAAAGGAAAAAAGTATAAATTAAAGGCTTGGTGATTTTACA  
CAAGAAAGATAATTTCCCTGACATGTTTACTCATGCAGGAAATGAGGATA  
TTTGGCGGTGGAATACAATTCTACCTTGATTATAAGCATCAGCATTGTTG  
ATTCCATTTAGCCCCAAAATAAAATTCAAATTTTGCAACACTTCATTTAG  
CAGAATATTAATCCCCTGAGACTAGAAAGGAGAGCCAGTGTGAGTAAAGC  
TTTACAGGGTGGATCAAGTTAAAAACACACATACACCATATATGTACACA  
CACCTATCCATACACATGTGAAAGCAAACAGCTTTGAATGGCTACAGAAG  
TCTCCAGCTCAGCCTGTAAAGTTATCTGTATTTTGGCCACTGATCCACTT  
GCTCAGAATAGAGCAGGGCACATCATGATGAATAATTATTTAATCAAATA  
ATTGCTCCATGCCTCCAACACCACTCCTTTAAGGACTGAGCTGGAAAAAA  
GACCAGAAAATATGTAAATTGGAAGTGAATTAAGGGATTAAGTTTCACTAA  
AAAAAAAAAAGGAGAAAAAATTAAAAATTGGAATAAAAAACAGCCTGCAAAT  
CCGTCTAAGCCAAGCCCTGTCTCTGAATTACAACACTAGCGCCTGTCGGC  
TGTGATAATTTCACTTCATTAAGTTCCAGATATAAATAGAGAGCTTTTTT  
TTTTTCCAGCCACCCTTTAAATAAGCATGGGGCTGAAAACACAGGGGT  
TATTGATCCACTCAGCTGTTTGTATTGGGTCTTTGGTCTTGCTTCATTG  
TTGCATTAGAACTTGCAAACACCTATATCGCGGAGCCAGGGACAATTCA  
CCTCTGTAGAAACCATTTTAAAGCTATTGTTTCCACTGCCAAAAAATATT  
AAAAGAATAAAATTAATCAAGTATGCTACATACTGAAATGCAAACAGAC  
ATGTGTGTACACTGTACATAAAGAATGCAGAGGAATTAATAAGCAAACCT  
CATTAATAACCAGTGCTTTGGGCACTACTACCAGATTGCTTTATTTCAGTA  
AGGTAATATAAAATACGATGTTTTTCCCTGGATGTTTAAAGGTTTCATATTC  
AAGTTTTCTTTTCTTTTTTCCCTAATTCAGAATCTTCCATAGATTTTTTCA  
GATAATGTATAATCCAGTTCCCTCAAATGAGCTATAATTTTTGTCACTCA  
AAAGTTTTGAAGACTAAGACATTTTACATAGAATTCTACTAGTTCTAATC  
ATAGAAATGAAGTTTATGACAAAAAGCGAATTATTGAATTAAGAGAACAA  
TAAAAAGCATACTTTTTTATAGGTAAAGTCCAGGATCAGCAAATTTTTTCT  
ATAAAACAGGCAAAATCAGGGATATTATGTTGGTACCCCTATAGCCGTTT  
AAAATGTAACCCTTTAAAAATGTAAAAGCTATTCTTAGCTTGCGGGCCTT

CCAAAAACAGGTGGTGTATTGGATTTGGCTGGAGGACCACAGTTTGCCCA  
CCCCTGGCTTAAGATACACAAAATCCTGATGCTTTACTACTTCATATACT  
ATTTATCATTTTTTATCGTGGTTTCCATCTGGCCACTGACAAATATGGACA  
TTTAATGGGTTTTAGTTTTACCTTTTATCTCCAAAACTCAAATTCAAAA  
ACATTTTAAATGTTGAGGGAAATGGCTTTGCAAGGTCTTTACCTAATGTC  
GATGGGCATTTGTCCATATTATAAAACAACCTGGCACCTCTTGGTACCAA  
CAGACGTGACTGGCCAAGGGGGTGGGGTGGGCAGCCACCTAAGAGTGAA  
TAGCAGAACAAGGCTGTGGGTCAACATTGAAGAGAAAAATCTGAGCTGTG  
GACATAGGGTAGTTGCTCAGGGCCTGGTGGGGCTTGAGCTTCACTCAAGC  
CATTTGGTTCTACAAGCCCTTTTATTTTATTAGCTTTGCTTTAGAGAACA  
GCTTCAAGAGGCCAACACCCAAGCACAAGGCATACAGGAAATTGTTGGG  
GAGATCCATGACTTCGTGTTGGTTCATCTTGGTCAGATGGTTATTATTCC  
CCAAGAACTGCATGAGCTTGATAGAAACCAATCATTACTCTGACTTTATG  
TCCTATTCCCATTATCACAAATTCCTGGCAAATTAAGAAGGAGGAGACAA  
CTCTTGAGCAGATTTTTTATCCTCATTAGATCTCAGCTTCATTAGGTGAAA  
GACAAATGTCAGCTCTGTTCTAGATTACCAGCAATCAAGAAGTCAAGAAA  
AAAGGTCTCCTCAAGATCTGAAAAACGTAGCTCAGTAAGGCAACAGTGGG  
ATATATACTTTAAAAGGCTAAGAGAAGAATGCTCCTACCAAAGGAAGCTG  
GGGAGTTGGAGCTATAGTCTCCTACTTGTGAACCAGGAACTGCAAGGGAG  
CTATGACATTAATAGCAGGGCCTTGAGAAATTTGTATGTGTTCAAAGCAC  
TGTTTATAAATGGGGTGAATTATACACATATGCCTTGCCTTTTTTAAGGA  
ATACATATGCTTGCTGTTGTGGTTGTTAGGATACAACAACCTTATGTCAA  
AGCAGTCCTTAATTATAAAAAATAAGTTACTATGTGGTAAGTGCTTAGT  
CTCTACCAGATACTGTTGGAAATACTTTATAGATACTATGTCACCTAATC  
TCAGTAGCCCCAGGAGATAAAATACTATTATCATCATTCCCATTGGAAAGG  
GAGGAAATTGAGATACAGGAAAGCTACATAATGTGCTGAATGGCATATTG  
TCAGTAAGCAACGGTGGCAGGATTGAAACCCTGACTTTAGAGCTCATTCT  
CTTAATCCTTAGGCTTCAAATCTGTGGGCCATGGCTCCAAGTAGGAGAGA  
ATCTACAACCTACATGTGGAGCTCTGGGGGGTTTTTGATGTTACAATGAGG  
TTCCCAAATTCCTCATGGTTTGGGGATAAAGCACAGTAAAGGAGAACACAG  
AATGGGAAATACATGAATGTTTATGTCAAATTTTTTCAGGAAGGGAGAGTC  
CTGTTAATGGATGAGAGAATGTTGGTCTTTTTTGATACGGTCAGGTACATT  
ACAGAAGGAGAGCATAAAACTTTGGCTCACTTGGCTGTAAGAAATTCAT  
TCAGATATTTAAGTGGTCTGTAAATAGCTTGCCATGTGTCTTGCCGTGTGG  
CAGCAGAACACCTTGAAGTCTCTTCTCGGTGAATACTTCCACACTACAGC  
AATACAGTATTTACACACACACACACACACACACACACACAATTTT  
CTTACTGTTTTATAGATTTTTCTCTTACGTCTTGGAACCTATTTTCCAGA  
GGCTGATAATTTTTGGGTCTGCTGGTGGGTTTACATTTTTAGGTTTGGAA  
AAATGGGTGATTGGACTCTGGAATTTATTCATCAAATCATGAGCCTCTGC  
CATCCTCGAGGTCAACCCTGACTGATAAAAATGTAACACAAGCCACAGAG  
GTGATTTACATTTTTCCAGAAGCCGTATTA AAAACGTGAAAAGAAACGAG  
TGAAATTAATTTTAGTAATATATTTAATTTTGTTCAATATATCCAAAACG  
TCATCATTTTCAGTGTGAAATTAGTATAAAAGTTAATGAGATATTTTTCAT  
TTTTTTGTGCTGAGTCTTCAAAACATGGCATGTTATTTTTACTTGTCCGT  
CTCAATTCAGATGCTAAGATTTCTTTGGGAACATTTGATCTATATTTATA  
GTCTGTAAAGCATACTATTTAAAAATATATCTACATACCCTCATTGTTCT  
AAGCATACTTAAATTTTTCCAATAAACTGAATCAAATATTAGGTGTTAAA  
TAAAAAATCATTAGAATTGAATAAACTTAAAATTCAGTTCATTTTTTCAT  
ACTGGATATATTTGAAGTTTTAACATCTCACCACACATAGAAATCACTTA  
TAAAGCTTATTGAACATACAACCTAGTAAGTAGTAATGCAGGAAGATGGCT  
GGCATGTGTTGAGCACTTCCCTTACCAGATACTACTCAAAATGTTTTAGC  
TTTAATGATTATGAGTATTATCATTTTTACAATAAGAAAAATGAGACATAG  
AAGGATTAGATAATTTTCCCATGGCTCTGCAACTAAGACAAGAACCCCTC  
CAAAGCTTGTCACTCTTAAAACTCTACTGTATGTAGCACAAGGGCCCAC  
TCTCCGCGGTAACCCCTGGAAGCACTAATTTACTGCTTCTTAAGTCAGGC  
TCTAAGTTGTGTCTTTTCCACAAGATCCACTGTGATTGTGATGCGTGATG  
CTGATCTGTGAGACATCGTTGTCAGCCTTCTTCAAAAACCAACAGTGGAG  
AATAAATATTGATTTAATTTAAATAAGTTATCCTTCAAAAACCTTTGTTG

AGAATTTGAACGTGGTCATTAAAAACAAAATTTCCTTGTACCTGCCTATAT  
CTTTGGTGAAATAATACTGCATACTATCTGTCTGGTCCTTGTTTTTGTGT  
TTGATGAAGTTTTCTAATAATTCTTAAAGGGACTAAGTAAATCTTGAAGC  
AGCTATAATCAGTAATTTCTACTTTGAAAAATAGAGCGCTTCCCTGCTA  
TTTTGCAAATACCAGCCAGAAAGCAATGCCATTGGGTTGTGATTAAAGGG  
TGGGATGGAGAAAAAAACAAACAAACAAGAAATACAATATTCTATACCAC  
TCCCTTCAGTCCTCTCTACGGCTCTGTAATGCATCACAAAGTCTCATGTT  
TTTAAGAATTTTTCTACGTGCTGGCCTTGAGAACTCTGCTAGGTTTTGC  
TTGACATTGAGATCTGTGAATTAAGAACACAACCTTTCATTTATTTCAGCAA  
CAATTGGAAAGTGTGCACGTTTCCATGGAGACAAGTAAGCCATTTCCCTTT  
CCCACATTATGAGCACAGGCCTTTCTACCAAGTCTGATTTCCGTCTGTC  
ACCCAAAGGTTTTGGTGAGATTGGGGAGTTTGATCCTCGGGTCTGGCATGG  
CTCCAGGCAGAACAAATAAAAAAAGACATAAATCATGGGGAAAAGAGGTTG  
ACACCGGTGGGAGGTGTGAAGGTGGGGAGTTGAAATATGGCTGCCACCGC  
ACATCTGTGGAATACAGAACACGGTTAAATTGAAAGAGCGCATCTTAATG  
AAAAATGTGTGCATAACCTCTGGTATTCACACTGTGGATGTCAGCATATGT  
AACGCTGCTAAAGAATCATTGCCCAGTGACGTTCCCTGGAGTTTTGTAGAT  
AACTTCTGATCCTTAATTTTACTATTTCAAGATGTTGTTTACTTATTCAT  
TGACTGCCTCATTCACTCTTTTAGTAACCATTTATTCAACACACGCTCAG  
TACAGGCATCATTTTTCGCTCATGGGGTAAGGTGAGGAATGTGAGGGAGAT  
CTAAAATTGTTTTAAAGGTGAACCCCGCTGTGAAAGAGAGAGAGAGAT  
AGAGAGAGAAATCCAGAATCACATGATGAAATAGATATTCATGAATGCCA  
GAAGACTTCCAGTGAAGTGCTCTATAAATGGATGGCTGTCCATATTTTGT  
TTTGACATTGAATAGAAGTAAAAGACAAAGGTAGGGACATTTGGTCTATA  
TTTATTCATCCAGACAGAATGATTGAATTGTAAACTAATTGACATTTA  
AAATAGGATCTCTGGAATTGGACTCTAGACTATTGAAAAGATTCAGTTAG  
GGCAGTGAATTAGCTGGCATTGAGATCATTGACACTAAGTAGCACCCACA  
CAGAATCCGGAACACCAAATCCGTATTCTGAAAACAGAGTATGAACAAAT  
TATTCTGCACGTGCCTAGAGTTTACATAATCAGACTATGCCAACTCAAGG  
GAAGGAAAGTGGAAGCAGCCTGGGTTTTGTAGGTAAAGATGCATACTTT  
CAAGATAAACGTGATGTATAGCTTTTTTAAATTATTTAGAATTTAAATAAT  
CAACTATCAATTTTTAGATAAGCACTTCATTTAATACAAAACCTCCTTTC  
GGTTTTCCAGTTAAGACTTAGGCTCAGATTTTACCCCCAAACATATTAAA  
ATCTAAGAAGAAATAATAAAGCAGAATCAGTGTCTTTCCTTTTCCCCTT  
TCTTTAAATAAGGGACAGATGTGAATTAATCTGCAAAATGGTGAAAAATAG  
CCCATTATGTTTCTAAGCGTCTCATCAAATATTCTAAATTTCTGTTAACA  
CAACTTCTAGAGTTATTGAGAAAAGACAGATTTTATCTTCATCGTCACTT  
ATAATCTGCAACTAAATCAGTCTCACTCCTCAGGGTTATTAGTACAGAAA  
AATGTACAGGCCACTGAGATGGCAGGTAGGGACCATGAGATTTTCAGAGC  
TGCTTTGGGAACCTTTGGAAAGAGTTTCCAAGTGCAGCATAATTCTTCTT  
TTCAGAGCTCTTTGCTTATCTTTAGAGCCCACTCATTTTATAAATTAGTCA  
TTTACAACATGTCAGAGATCAAGAGAAGGGGTTGTGTGCAGGTAGCTCCT  
TTTGGGAAGGGATCCAAAGAAACACCAGTGGGAGACTGTGTGGGAAGTGC  
AGCGGGAAGGAGAAAAGCTGCTCTCTAGTGTGCACAACTGGAACCTTGATC  
TCTTGGGGGAACCTCTGAGCCCTGCACAGAATGAGGTTGGATCCTGAG  
AGGCAGAAGAGGGGAATATCAATTGTCTCTATCTCCCATTTGTTAAGAGT  
AGACAGATGGGGTGTTCACTTGACATTCTGGCTCAATGATTTGCTCAGG  
CACCCACCATGCACAGAAGAGAAGTCCAAGGAAGAACTGAGGCCATGT  
GACACAGCTACCAGGGCAGTGAAGAGAAGCTGAGGGGATATACAGCTGAGC  
AAAATCAACATCTCCCTCTCAATACGATGAAGGTCCACCAAGCCTCATCT  
CCCTTTATGCATCTCTCCTAATCCTTGTTCCAATGCCTTGATGCAGGAGG  
TGTTTTAAACACATTTATTGGGCTGCCTGGGTGGCTCAGTGGTTGAGCAT  
CTGCCTTTGGCTCAGGTTGTGACCCCGGGATCTTGGGATTGAGTCCCCCA  
TCAGGCTCCCCACAGGGAGTCTGCTTCTCCCTCTGCCTATGTCTCTGCCT  
CTCTCTCCTATATCTTTCATGAATAAATGAATAAAATCATTAaaaaataa  
ATACAACACATTTGTTCAACTGAGCTGAATTGAGACCATGGAAGCTGGG  
CCAGGACTGTGTTTGTTCCTCACTGCCTTTAGTTATGCATGAGTATTATC  
TGAGTATACTTTATCTCATTCAATTCATTTATTTCAGCCATTTGAAATGTAC

TGAATCTATGAGAAAAGAACTGCTCTAAACATGGAGAGCACGAAACCAAT  
AAACAGTAGAGGTTCTTGTTCTAATAGTTACGTTAGACAGAAATAGATAT  
ATACCTTAGAAAAAGTCTTAGAAATGATTAGCTAATTTGATACGTGGTGA  
GGAGAGGAACATGCCCCACGTGAGACTGATGGAAGATTTTACCTGTCAAG  
TGCCATTAAGGCTGAACATGAAGAGCTTGTTAGTTATTGACTGGGTAATG  
ATTCAGTCTCAGCTCTGTATTCTGTAAAATCATAGACAGCTTCCTCCTCC  
CCATTTTATGGGACAAAATTTAGGCTCAGTTTCTAGAAAAGAAACATAGG  
CCCTAGGAAGCTTATGCAAATACATATTGTTGCTGCTGCTGGATGGGTTT  
CAGTAGATTTTCCAGAGTGTGGCAGGATTTATTCATGACATTAAATTATG  
TTTCTCTTTTTGTTGTAGCTGACTTAAAAGCAGAAAAAAGTAATATATT  
TCTTTTTTTTTCTTTCTTCCCAAAGAGCTGAATACTTAGCCTTTGTATCCC  
TGTTTTGAATATCCTGACTTGCCCTGTGGAGATTTTCATAGCATTTTCTTTC  
CAAAAAGAGCAGGCTCCTGCACACATCCTTAGGTCTAGGATTCTATTTGC  
AGTCTAGGACAAATGAACTGGACCACCCTGGATGCATGACTGAGAAGGCA  
TGGGACTATTAGTGATGGAGCTGACTTGACCCAGGTAGTTGGCCCCAAGG  
GGGAAACGGGCAGATGGCAGATTCTGCAAGTGTCAAGGACATAAATCCTG  
AGCTCTTTCTGGTGCAACATCTTGGGAGTGGTAACCATTCTGATTGAGTT  
GTTTCATGAATCCTGGAGTCACTAAAGGCCAAAAACCATGGACTTAGGACT  
TTCTTCTCCAAGATACCCCTTGATGGACCTCAAACCTATTTGTTCTTTCCC  
ATAGTTTTCTGTACTACATTTGGCTCTGGGGCTCTTATATTACCTTAGAA  
AGGTCCTGCTATGGTGATTGATACCATTTACCTTCCATCCAGTCAAGAAG  
AACATAAAAAAGATATAATTTGGTATGCAAATCATAAAAGTAATTTCTG  
GTGCTTGAGGGCTCTACAGAAAATTCAGTTTCTATGTTAGAGTTGAGCCA  
TGGGGTCCATTTTCATTCTGGCTCTGTTTATCAAAGTTGTGTTTTCTTC  
ATCATGTTATCAAGGTACTGATCATGTGCCATTTATCCTCCTAAAATGAC  
AGTTAATCCCCTTTTGATTACTCCAAAACCAGATGGAAACAACCACTAC  
CTTCTCTGAACATCCATTTGTTACTTCCCCATAGAATTTCCCTTCTGAAC  
TTTTTCTTATGATCATTGTCACCTTTTATTATCATTGCACCTGGTAAATA  
AGTGCTTTGTTTATAGCATCATTGAGCAGCTGTTTATCAAGTGTAGAATG  
AATCAATCGATGAACTGATTGACATTGGTAAATGGAAGCAGGTTTAAAT  
ATCTCTTATAAAGAAAAATCAGTGTCTCTGTGATAGCTGTATTTACAAGC  
ACATCTTATTTTTCTTTTTCTTGCCCCCTACAGAGTAAATCCACAGAAAAT  
TAAAGTGCATGTAACCCTTAAAAGGATATATTCCATTATCTTTAGAAACA  
GAGAAAAGAAAAGATGAAAGGAGAAAAAAGATTTTAAATGAATAGGAT  
GGTGGGGAGACACCTGGGACGTAGCTCTTTCTATGCCAAATGAAGTAATA  
ACAACAGCAGCAATTATAATGTGTAAGCTTTGTTAAGTGCTTATTGTGAC  
AGGGATTTATACTATTAACCTCACTCAATCATAACAGCAACTCTTTGAGGT  
TGTAATATTATTATCCCCATTTGACAGCTGAAGCAACTGAGCCACATGGA  
GTTGGGTGGCTCGTCCATGGTGACTTCTTTAGAAAGATTTGATACTGGGG  
TATATGGAACCAGGCAATATGGCACTATAGCCCATGCTACTGGGTGCAC  
TATGCCGCTGTCTATAAAGCTGCCTCCCACCAGATGCTTAGTTTGTACT  
TGCCACTTTACCTTTGCCATTTTATTTAATCATCATAATGTTGTGAAATG  
GTTTTGTGATTACCATTTTAACGATGGGGACAGCGAGTCTCAGAAAAAGG  
ATGTGATTTACCTGTGAGTCTCTAGCTTCTGAGAGGCAGGTTAGAATTCA  
AACCAGACTGTTTTAAGGCCAAAACCCAGTTATTTCTCTGTGCCAAAT  
GCCTCTTTTTGAAAGTGGAGCAGAAAGCTTTCCACTCTGCCTCTAGCTTC  
ATGGGAACAACCTGAAGATTCCCATTGCTCCACCTAAACTCACAGCCTTTA  
ACCTCAAAATAAGGTGGTCATTTTAATTTGGGGGAAGTTCACTGTTGATT  
GCCTCCGGTTCAGATATCTGACAAGTACCTGACGTATCTCTCTCTCTTT  
GGCCCTGTACATCTCCATCTGCAAGTACCTGGGGTCCCTGATACCTTTGG  
ATTTATTTCCATTATGAGGGATTAAAATGAATCACTGTTCACTTTTACAT  
GTAATCGTTCATATTATGGTTACGCATTAAAAAATAAAATCTTTCTTTA  
GACTAATATTGATTGAGAAGGTAAGATTTCATGAGGAATGTAATAAGTTTA  
GATGAGATATTTCTTATTTTTTTGATATTTCTTATTTTAAATGACTACAT  
GTGTAACCTATACATCTACACATTTACATATTACCATTGTACTTGAAAAGT  
TCTTCTCCTTAAAAACAAATGTGATAAATGGTTTAGTTATTATTTAGTT  
TGGAATAGGCAGCTACAGAAATAACATTTTAATATATTCCAGATTAGAC  
TGCATGCTATATTTGTAATAAGGACTTGTTTCCAACATTAGTTGGCAGAT

CACTCATATGAACAATTATCCAAATAGCTATTAGGATATGATTGCGCTCA  
TTTCCAGGCAAAGCAGGGTTGCCAGAACTAAGCCTGGCTGCTGGTGAGAT  
TTTGGTTTGACTTTTGGAGAAAAGCCACAAGAATTTGTCAGTCATCTTGGC  
CGTAAGGGAGTCTCCCTGTCTTGAGGCTAGTCTCCTTCTACTTGAAAAT  
AAGGGCAAATGTGTTTCTCTTTTGTATTTTACAGTTTACACGATC  
TAGAAAAAAAAAAGGAGGAGAGAAAGGTAGGGAGGAAAAGAGTGAAGGGG  
TGGTGTTGTGCAGGAAAGTAGAATGAAACACTGAGAAAGGGAAGGAGTCT  
GTGTGGCTTAAAACCCAGTGAAGCATGGGTACAATGGACATACATCCAT  
AGCCATGCATCCATCATTTTGTGGATATGCTCCATAGTTATATCTCTGCA  
GAGAGCTTCATACTTAGTGTAATTTCTAGAAGGGGATGCCAAAAAATG  
GTGTTTATAGAAATAGAAAAATCAAGCTTTTTTCTGTGCCCATTCTATTA  
TGCTTCTGCATAGTTTGGCACCTGGGGATCCTGCTGGTTAATCTGGTCCA  
ACACTCTAACCCAAAGAACAGTGACTCCCTTAGACTAGGTGAAGAAAAGCT  
CCCTTTGTGCTCAGTCTATGGCTGGTGGAAAGATTATTTAGAAAGCCCGT  
GTGCTTCATGGGAGTGGGGTGATCCCTCCCACAGCTCATGATGATGGAGG  
TTTACGACAGGTCTCAGATTCCACTCATCAACCACCAAAACCACTGTCCC  
TGCCACAGCTGGAAGGTCTCTATTCTTCTTCAGATTGTGGGGTGGGGAA  
GGGCTGAAAGGGCAAAGCAAAACACATTTTTTTTTTCAATCTAAAGTTATG  
GAGTCCATCTTGTTGAAGACTCCTCCAGTGTACTTTGCCAGTTTGGGCCT  
GGAAAGACAAGTTATCTGAAATAATTATCTTTAATGGAAAGAAAATACCA  
TGAAATTCAGGAAGGTATTTTTCTTCTTACCTAGTGATGGAATGAGAC  
CATTCATATGCAACCTCTACTTTGCATTAGAATCTAAGGCTCTCCAGTA  
GTTATCTAGTTGAGGTCTTGCTTCCAGAGATTATTGTCACAACTAACT  
GTATAAAATGGTTGATGATCAATAGCGGACTTTGAGTTCTACAGTGAGTA  
GAACTCAAAGGTGTACCTCTCCTAACATGGAATTCAGAGTGTGAGCAGAA  
GGAATTTAAAGGGTCATTATTATAACTATCCTACACCATCTTGATGAAA  
GTTTACATTTATTTTCATCAAAATTTTATTGTATTTTATCATGTGGCAC  
AGAACTAAGTTCTTTTAAATCCACGATCTCTTTTAAACGTTTGTGAGGATA  
GTTTTTGGGAAGGTTGATTTTTATGTCCATTTTATAGATGTGGAAGTAGG  
GTATCAGGGAGATTTAGTAACTCATCCAAGTGTGAAAGGAACTCATGAAT  
GATCTGGAATGCAGATTACAGGTATTCTAATACTTAGTTCAGGGCCATGTG  
GGTCTCTCATCTTAAGGAATTACAGAGTGACATATATTTGAAGAAAAA  
ATCAATACACATTATCTCACAGAAACCTCAAAATAGTTGTTCTTACCATA  
TATAGAAAGCAAAACCGTGGCTGAAAGGAGACTCTCTGCCTGTGGAACCTC  
AAGGGCCAATTCTTTTTCTCTACTGTGGCAGCTATAGACTTCTTCCCTCA  
TGACCAGAAGAAAGGGCTACATGAAAATATTCTAGACTGATTCGAAAACCT  
AGTAATAGTCCAAACAGACTTTGACTTTTTTTTTGTAGAGACAATTAAGGA  
CAAAGATTTTCTGTATTGGTTCTCTGGAAGAAAGGACGAGAGAGAGAAAG  
GACAAGGTGAAAGATAATTTCAAGGACAAAACATCACATGATGGATATAC  
TCTGGTGGAGAGAAACGGAGTCTTCTCTGTTTCCTCCTGGTCCCATGTT  
TCCCAAACTGTTATATTTTACGATTTTGTCTTCTTAGGAAAAAAT  
TTCTTACTAGAATATGTTTAAATAAAATATATTGGACCAACAGTAATGTA  
AAGCAGTAACAGAATTATATTATTCTTGAAAAGTTATTGAAAGAAAGAAG  
GAAGGAAGGAGGGAAGGAAGGAAGGATAGAGGGAAGAGGCAGGGGAAGA  
GGGAGGGGATGGAGGGAGGAAGGAAAGAGAAAGAGAAAGAAAGAAAGA  
AAGAAAAAGAAAGAAAGAAAGAAAGAAAGAAAGAAAGAAAGAAAGAA  
AAGAAAGAAAGGAAGGAAGGAAGGAAGGAAGGAAGGAAGGAAGGAAGGA  
GGAAGAAAGAAAGAAAGAAAGAAAGAAAGAAAGAAAGAAAGAAAGAA  
AAGAAAGAAAGAAAGAAAGAAAGGAAGGAAGGAAGGAAGGAAGGAAGGA  
AAGAAAGAAAGAAAGAAAGAAAGGAAGGAAGGAAGGAAGGAAGGAAGGA  
AAGAAAGAAAGAAAGAAAGGAAGGAAGGAAGGAAGGAAGGAAGGAAGGA  
AAGAAAGAAAGAAAGGAAGGAAGGAAGGAAGGAAGGAAGGAAGGAAGGA  
CTCTGGAATCTTTTTTTTTTTTTTTTTTGTCTGCCAGAAATCCAACCTTG  
GCCTGGCATTATCTAAATTTGTATTGTCAATTAGAGGGAAGGCATTGGGT

TCTGCTTGCCACAGCCTCTATTTCCTGATTGACTTCTAGCATAGTCCATGG  
TCATAGGAGCCTCACATGATAAGGTCATGGTCAAGGATATAATTA ACTAT  
GAAGAGAATATGTCCTGTTTTATATAAATTCTTATTTAAATCTACAATCA  
CCTGGAGCATAATGATGTTCTGCATCCACTTTCTTTTCATAACTACTGCT  
GAAATTAACTTGGAATGAGAGGGAAGATTGATATTGTTGGTTGTTG  
GGGTTTGCATTTGACATTCTCAAATAATGGGATGTAATATGGTTATGCA  
GAAAACAGATTGATTTTTTCACAATTTTCCACAGAGGTAATGGAGAACAG  
ACTGGAGGAAATTCCAAGGTTTCCTTGGGGGAACTGTTTGCAACACA ACT  
GAAGAAGAAAACAACTCAAACCATCCTTTTATGCAATTTGCCTTCAATG  
TTTTAAAGTAGGAAATTTGCTAACTAATTTGTTTTTCATTCTGTGAGTTT  
CAGGAATTTGGGAATATTTTCAGTGTTGCAGAAAGATTTAGAAAGTCTA  
CCCATTGGGCGAATCACAGGTGAGATCAGTTAAATAATTTGTGATAGTAA  
TGGAATTACCTAATATTTTCTTCTAAGGATTTTCAGTCGTGTGTTTTAGAA  
TCTCCTTCTTTTTTGGCCCTGACTCCTTTCTTCTCAGCCTCCCTTCATCC  
CAGCAGAAGCTAAAAAATAGTATCAGTGCATTACTGATATTGAAGCAAAG  
CCAGAGATATTAGGGCATATGCCCAACGTCACACAGTTGGTAATGGCAGT  
GCTGGAATCTCTCCCAACTAACACAGACTTTTATTAATGCTACAGAAAGG  
AATGCACCCATGAATTTAATTTCTTATTTCTTGCAGGAAGCCAGTCAAC  
TCAGTTGGTTAGAGCACAGTGCTAATGAGGTCAAGGTCACTGGCTTGACC  
CCTGAACAGTGTCTTTAACTTTGCATTAGCTGAGTTTCTAATCCTGGACC  
ATATTTCCAATCCTGGCCCATACATCCAAATAGAACAAAACCTTTTCCTCT  
GTTCCCTTGTGATCAAAATATGGGTGCCTCATAGAAAATCCGTCTTGT  
CACTGAGAAAGCAATGCAGAGTGTTTATTCTAAATTCTACGTAGTCAAAT  
AACACATCACTAGAACACTGAGTGAAAATTAATGAGCTAAATGCCTTTG  
TTTTTATTAATAAACTTTTATGTCTTCTTTCCACACTGAGTGTATCTTCC  
CATGCCTTATTCCTAGTACAGGGAGAGAATGGTTCCCTCATTGCCCCAGA  
TCTCTAGGTTTTGGAGAAAACAGCTCAAGGAGCCTCAATGAGGAGGTAGC  
TATAAACATAAGTGTGTTTCAGGAGTACTGATGGACTGTGCACAATTCCTC  
CCTTGGACCTAGAATTCCAAACGTGTGGGCCCTTACAGACTGAGTACCCAG  
GCTTCAGAAAACAAGCATCGTACATCTCTGGTTCATGTGTAGACATAGCC  
CACTTCTCTCTTTTGAAGTAGGAGTCTCATCTTTGAGGCACATCTCCCAT  
TTCAACACTCTTTTCCTTCTAGTTGTTTCCTTCTTTTCTAGAGCATGAAAA  
GTTTTCACATTGTTTATGGCCTGAAGAAAATTCCAGACATTTTCCTAATG  
CTCCATATTTCCAGCCTGTTGCCCTGTGTTTCATGACTGGAAATACAGCCG  
GAGAGAATGGAGTGGCAAAATGGCACTTCTGTAACAAGTCTGTGATGAAT  
TGTCAGTAGAGGGAGTGGTATAAATATGTTATTGAAACGTCAGTCTAAG  
GCCATGAGGCATCTAAAAAGTAAAAAGAAAGTCAGAGGGCACTGCTTTGA  
GTCATATAGACTCAAATCAGAAGGTGACTTCTTTTATCTGCTCATTTATA  
CATCAACTAATGATGTAGAGCCCATTCAGATTTCTCTGCTTATGACCTC  
TGGCTTCTAGTTTGGACATGGCCCTCTTTCTTGGGAACACTTTTTTGGAT  
CACCTTTTCACAGGGTTACATGCAGCCAGATATCACATTAGAAGACAATC  
TTGTCAACTGATTGAACTCTAGGCCTCGTCACTTGTTCCTCATAGGCA  
TAACTATTTTATGTTGAGACTTCTAGAGAAAACAAAGGATTTCTCTTCAA  
GCAACAAGTCATCAATGGATGGAAATTCAGACCCTGAAAGAGCATGTCTT  
AGAGAAAATACATTGTGTATGTGTGTGGTGGGGGGGTTGTCTTTCTTCT  
TTTGGGGCCTTTAAATCACACCGTGTGGAACCTCATATCCATCTCCCAT  
ACTATGCATAAAATGAATTCTGTCCACAAACATTTGATGTCTTCATGT  
GGACCTCAGCTAGATTGAACTCCTTATGCCACTGGAAGATGGTGTCTGAG  
TGAGCTTAGACCCAGATCCCCCTTTCTGCTTAGAAAACCTTACCCAATATC  
TTATTTCCAGAGCAAACAGATTTCTATGGTTTTTCTATTGCTTTGCTGG  
CAAGTCAGCCAAGTGGAGTACATTATTTCATAGTAAATAAACCTTCAGG  
TTTTTTTTTTTTGTTCCACGGGAAATTACTCAGTGTATAGTACAGACGTGT  
CACCTTCACATTTCCACAAGATTTGCTTCCCTTTATAATTGTGGATCCTG  
CTGTGTTTTAAGAATGATCAAAAGTTACAGAAGCCTGGTTTTTCATTTCTCT  
TCTTTTGTTACTTCTAATCTCCAATTTCAATTTACTTCCCTTCGCCCTTT  
CCCGTCTGACCAACGTTCACTAACAATAGTGACTTAAAAATTTTATCCACG  
TAGACACACCATGAGTGGGATGAGATGCTCATTCTGTTTTATTGGGATAG

TCTTTTTTCATAAGAAATATGAGTGAGAATTCATTCATCTGTGGGAATACA  
CATGGTTTTTTTTTTGTGTTTCATCAGGGTTACCATCTGCCTTTTTTTTGCA  
TTTACCCATTTTTGAGGGCCACGTCACCATTGAAAGTGACCAACACCATAA  
AGAATTGACTATAGCAAATCTCTGTTTTTCTGCTTCACAGTTCCATAGAA  
AGAGGGGAAGAAATTATAAATAAGAGTTCCTGAAACACTATCTTGGTGTT  
TCTCATAGATGCTCCATAAATATTACTTGTTGCTTTCTATTAATATGAAG  
GTTGAAAGAATGTTGTTGTGCTTTAGATGCTTGATCAGCTTTCCTCCTTT  
AACAAAACCTGCTCTGTGTTTAAAGAACCTGGATATATATAATGTAATTGAA  
TGTCCCATCTTTAAAGCATGTAATAGTTATAAAAAGAGTGAGTTGATGAC  
TTGTTAAAAAATTCAAACCAGAAAAAGCAAAAGCGATGAGTTACTAATAC  
CCAGGTGTCCAGTTAGCTTAGGCAGTTAGAGGCATACACTGATGGAAGCA  
GGTCCCTTGGGTCAACCTTGCCATGACAGAGTTAAATTTAATCTATTCTAC  
TGTCACAGTAATGAACATTACCCTGAAAGCCCATAATGCCTGTTATTAA  
TCACAAGTAGTGAGTAAGAAAAGTTTAGCGAAATGGTTACCAACCATTCCC  
TACTATGCAAAACAAAAACAAAAAACTAATTCCAAGTGCATAGCCTAAGG  
ATGAGTGCAGAGCATCACCATTGTGTACAAAACACAGCACATTGTCAAAC  
TGGTTTCAGAATTTAAATATGTAGTATGTACACATTCGGAATTCATTGAT  
GTTTCATTGAAAGAGTGGTTCATAAGCAATATCTTCCTTTTAAGACTTTA  
GAGTTTAATTGCATTGATTCAAGGATGTGAACTCTCCTTCCTATATGCCA  
AGCATATGTGCCTAATTAACACTGAAGACAGATATATACCAACATGACAT  
TTACAGAGCATGTTGCACTTTATAATAACTTTGCTGAGACTTTCAAGAAA  
GGTTAACTGTATGAATTCTCTACTGTGGTAGGTGAACCTTTCTTTCTTAT  
AAATAAAGGAACCTTCCCCCTTCTCCCCCTCCTCTCACCAAATGATATCT  
TATTTGGGCTTGTAATACATAAAACAGATAAAAAATAGAATCCTTCAGGT  
GAAGCAAGAATGGCAGGTCTAGTGCAACCTAAAGCTACCTAACCTCCCAT  
CCACTGGTGATTCTTTGATAGAAATGAGAAGGACAGAAATGTGTTGATGC  
CAAACACCACTCTTATGGAATCATGAAGCACACATGACCCTTGGGTATGT  
CATGCAATCTCCCTCCCATATTGCATTTACAGATAATACTATCTCTTATG  
ATTAAAGAGAGAGAAATATAAGCAGTTTCAGACATACTTACCTAATATAT  
GCACAGATAAATGCTTAGAGTAGCTAAGAAGTTTAGATCTTCAGATCCAG  
ACTAAAGCCAGGAAAGCACACATAGCCAGAGTTCACACCCAGCCCTTTT  
GTTTATACATGTATCCTCTAAGTGACTAAATCTTCCTTTTGGCATCTGT  
CAAATGGAGAGGGTGATATTAATCCCTATAGGGATTCCATGAGGTCCAAA  
GAGATAACACATAAGAAGATAATTTAGCACAGTATAAAGCATAAATTAGG  
TACTTGATAAAAGCAATGTTCTAATAAGTAAAGAATTTAATGGAATAGG  
AATAAACATAATCATGGATTGTTTCATGAATATAGCAACAACCTCTACAA  
GATTAAGTTAGAATTGGGATGCCTGGGTGGCTCAGTGGTTGAGCATCTGC  
CTTTGGCTCAGGGCATGATCCTGGAATCCTGGGATCAAGTCCCACATCGG  
GCTCCCCACAGGCAGCCTGCTTCTCCCTCTGCCTATGTGTCTGCCTCTCT  
TTCTGTGTGTCTCTTATGAATAAATAACAATCTTTTTTTTTTAATTAAGTT  
AGAATTTAGTCAATAATGGTATAGTCTATCCCCTAACTTCAGGCAGTATT  
ATTCCCTTAAACAGGGAGTCAAGAAAATGCCAAAATAAAAGATTATGAAG  
CTTATCACTGTCTGGCAAGTTTCCATACAGTAGCTAATGAATTCATGAGT  
GGGTAATCTAGTATCTGGCTGGTTAAGTGTGAAATATTTACTATTTTAAG  
TTTTTTAGTTCTTCTGTTGGTCTGGTAATTCTGTAAATTAATTAGCATTG  
CCACAGGTTATAAGTTGTGCTCATCAATTGAATAGAGGTATATCCATCAT  
TCAAGTGTGAGAGAGAACAGGTGATGATATCCCTTATTGGCTTCAGAAGC  
TAAGTGTGTCAGTCAATAGAGGAAGAAAAAATTTTATATAAGATCAACTT  
TCAGAATGTTCAATTAATTAATAAATAATATATTGTAAAGCTCAATATGTTT  
CTTGGCACAGACTAAACGCTCAACAAATGGACATGATCATCTTTACCATC  
AATATCATCTCTATTATCATCTGCTCACTCAAATGCTCTTCTCCTGACTTAA  
ATAAAAATTTTCATCCCAACAATTCAGGGATTTCAACCTATGTCATTAAAA  
CAAAACAAAACAAAACAAAAAACCAGAATCTACTTACGTGGCATCT  
ACACAAATAGAAAAACCCATTGTCACTCATATGACTGAAATATTTCC  
TTTTTTGACAACACAGACATTGCATTAGGTTAGAATTTTATGTTTTGATA  
GGTTTCCAAAAATTGTGTTTTAGGACATCAGTGGACTTCATTGTATTATA  
TTATCTTCTTGAGTTTCTGCACTATATATTTTAGTCCTGAATAAACAGAA  
AGGCTGGGGTGGATTGGAGAGATGTGAGAAAATGAAGACTGGAATACAGG

GCTGTCAGGCTGAAGTGTAGTTTACCTTCTGGCCCTACCTGATCCTTTGG  
GATTTCTGAGGTCAAGATAATGGCTTAGTGATGATCTGCAAGGATGAATG  
GATGGATGGATGGATAAATGGGTAGACAGACATACAGATGTTTATAGATA  
TACCTCTAATAGCCATTTTATCTTTCCTCTGTAGCTGTAGCTAATGCATG  
AAGCTAGTAATCGACAAGGCAAGTAGGCAAAGGAGACAATGCTCTTTTAG  
CACAAAACACTGCTGCTACATTTGCTCTACAATTGACAAGAAAATTGCTC  
AAAGACTGAGATCCATGTCATTTTCTTTATCATGGTACTCTATATAGAGC  
TCTTAGTTTGATATGTTTCAAATGAAAGAGGAGTCATGTTAACAGTTATC  
TATATTCACTGTTCACTGAAGCTCTTTCAAAACTGGGTGAGATTTCTTG  
GCTTGAGGTTACTGTCATTTCTCCAAATCCAAGCTTTATTTCCAGAGGCT  
CGTGGTTTGGAATCCCGGTCTGGAGTTGGCATTCCAATTCGCCCTCGGCC  
TGCCACAGCTAGATTGAATTTGCTGTTTCTGGACTCAAGTGCTGAACAAG  
ATCCTGGTGCCTCAGGTAGGGGATGTTTGACCATAGGGGAAGAAATCTCT  
GTCTGCAGTCTCCTTTGCTCAGAGAATGGAATCACCCATTAATATGTGGT  
GGAACCACAGTGCAGGCATTGAACTCTTGTATGTAACATATTAATGCACT  
AGTGTTTTAATTTCTTCTGTGGAAAAATAAAGGAGATTTTCTCCCATAGGT  
TTGTCCAAATAGAGTAGATACAGAGTATTAGTGGCAAGGTCATAGAATTA  
GCCCTCCTACAGCTCTGGCACCTTGGAATTTATGTGCTTCATGGTTTTCC  
AATAGATTTCTGAAAGACTCTCTTAGCTGTTGTCAATTTTGCATAAATTA  
TTATAACATAATCATACATGCAAATTAAGGACAGCCTCATAATCTTTAAA  
AGGGTAGACATTCAAAACGTGACTGGTGTGTGACAGCCATTTTTTTAGTT  
TTTTTTATTTTTGTATTTTTTTTTTTTTTGGAGTTCGATTTGCCAACATAT  
AGCATATAACAACACCCAATGCTCAACCCGTCCATTTTTTAAAAAATCT  
AATCTAAGAAGATTATAAAATAAGTCAGGGGAGGAAATGCCAACATATCA  
CTTTAACTTCTGTGAATGATGAGCTCTTCCCAAAATTACTTGCAAAATTA  
GTTTTGAAATCTCTGGTTTTCTCCTTCCCTACTCTCTGCCACAACCTGAC  
CATTCCTTCTGTTTGCCCAATCTAAATCCATGAAATTTTAAAGTTTCCTA  
CAGCTGACCTCCCTCACCAACCTTCCTAACATGAACAGTTGCTGGAAA  
TTGCCCCAGTAATGTCTTACAAGGTCAGTCTTTTTTAAAGTTTCGACTTC  
ATCCAAGACAAAATTCAACTCTGCTTTTCTCCATGGCCTCTGCTCACCCA  
AGGAACTACATAAAAATTGTTCCGTTTATTCTGTGGTGTGAATTCAGA  
CTCAAGAGCAGGTTTTTGAGGTTGTGGAGTCAAGGAGAAGGAGAGGCATG  
ATGCAATGAGGGAATCTAGGAGAGAGAACAAAGAGACACACATCCTGCTT  
TTGTTTCTGTGGTCATTTTGGCCTCTGGGAATTTTTTAAAAAAGGTTGAGG  
TCTTCTTTCTGATTGATAATCACTTCCTATATTTGTCCCAGACAATCC  
TAAAAATTACTGCTTTGAAAGATATATTTGATCCCTGTAAGTTATCCCTA  
TTGCCCATTTTCACTGGCTGATACTTGGATAAGGATAACGCTATATATGA  
AGACATTTTCATCTATTCAATATTCTAAACCTTTACTTTTGCTACAACCTGT  
CTAGGGATGATAAGAAATAGTGGCCATTTATTTGGGCAGAATTATACAAT  
CATCTCTAAAGTAAAAAATAAAACAATCTTTTATTTACTCTTAAAAAGG  
ATCTAGCCATTGATTGAGAGGGGAGAGAAGTTATGCATTTGGAAAAAAT  
GTTTAATAGTCGATCCAAATAAACACATTATAATTAGTTTCTCCTTTGGT  
TTTTAAGGAGTATTAGGGAAATAAGTGGGATCCTTGGTCTTAGAGACTCA  
TGTAACATGAACACAGTGTTTGAAAAATTTCCCTTTAACTCATTATTGAA  
GGAAATTATAGTAGGATTGGCCTCAGTCTATGGAAGTTTAAGCCATATAC  
ATTATAGAAGCACATATATAATGTGTAATATACATTATACCCCAAATTTT  
ATTTACTTCTGAGGTCCCCATGACTCTACTCTCCGTTTCTTTCTATATCA  
AAGATTTTACCCAGCCAGAGTTTTTCATCTAGTATCATCTGTCACCCTGC  
ATGGAAGGCTCCTGAATTACAACTCTCACTCTGACTTCTCTTGAATGGC  
AGATCCATATTGCAACTGCTCTCTCGACATTACAATGGGAATGTAATTT  
CAGTTCAAACTAAGCTCTGAACACCACTGTTAATCTGTTCTCTAAAATGG  
GTACCCCACTGTGGATTTTGATGCCAGCATTCTGCTAACATGGACTCAT  
CTATAAGTTTTAGTTCAATCACCACAACCTATTCAGTCAGAAATGCCTGTT  
ATTACCTCCTCCCAAATAAGTACCATACTTGAATTTTTTCTCTTCAATATA  
GCATCAAACAATGTTTACTTTTTATTAGTTTTTGTGTTGAGTGATCTCC  
CATGCTAACTGCTTTTTGTTTCTATCCTTTGGACTGTTTGCTTAGCAATTT  
GTCATGTACCAGCGTTTATAAAGTCATCTAAACTTAAAAAAGATAGAAT  
TGTGCTATCCTAAAGCATGATTTTATTTCTTCAAATTAATTTTAAAGAGC

TTCAAGAAATCCCATCGAGCTGAAGCCCCAACATAGCTCAAAATGCATCT  
TTCCATGCTGATCTCCATTGCTGACTTTCAGTGTTGATTGAACGAAATGA  
GGTCTTAGTTTTTCTTTGTTGATCCTCATGTACATTGACATCTTCAGAGGA  
AATTTAAGAACAAATGGACTGCTGAGAAAAAGCCATATCTGGCAATCCAA  
CTAAGAAACAGGGAGAGGGGATCCCATAAAATCTAATAAAACCCAGGGTG  
GTGGGATGGGGTGGGGGAGATACGCTTAGCCATTGCCACACGAGTTTCTC  
TTTCTTCTTCAAGTGATTATGAGAAAAAAGGATTAGATACATATGGTAT  
CTAAAGATCATATGTCAGTGTGTCTTTTATTTATTCATTAGACTACTAGA  
CACAAGTAGTAGTGTCTAGTAGTCTAATAGTGTCAATAACCGTCTCTCA  
CAAAAGTAGAAAAATCGAATATCCTAGCAGAAGGCCTGGTTAAGCACTGC  
AAGGTTTTCTCCAGAAAGAAAGCTTTACAGCTCTGTGAATCATAGCTGTA  
TGAGGCTTATCTACAGAAAAACAGAGCCACTGGTTTTGGTTGGTTATTTT  
CATACACATGTTATCCCCACCTACAGTACTTGTTGAAGACATAATTTCCA  
CCTCACTCTACAATTATGTTATGCAGACTGTTCTCAAACAGGCACTGCTG  
TCATTAAAATCTTGCTGAAAAATACCAACTGCTTGTGGGCAATCTGAGTGA  
CCACATGCTGGGGCCAGTTGCAGAAAAATCTACAGCTGATCTACATGATC  
AGTTTTTAGGTGATCATGCTGGCAAATGCAATCTTATGAAACACTAGTTTT  
GAGTTCAGGTGTTATGCAGGCAGGGGACACTGCTTTCCTAAAGGCTCCT  
TAGTGATTAACTTAAAAGTGTGAGATGCCATCTGCTGGAACTGATAATA  
TGGGCTGTGATATTCTGGAGCGATACTTGGGCTGTCTATCAGCAGAACTG  
TAAGACAGATGTTCTTTTCCACTTCATTTCCCCCTTTTCTATTTTATATG  
GATGATATATGTGTAGAGTTATTGAACTCATTAGCCAAATGCCTGCATCG  
CTGTGATCTAAACAACCTTCCATTTTAAAGATGTGCGTTTGATTGAATGAT  
CATTTCTTTAGAGTTGGGGGAGACTCGTGGAGAATAAGCCCAAACCCAATA  
CATACTCAACGATAAGGCACATCTTAATTTAGAAAATGTTAAAATAGAAA  
AAAAGAATGTACCGTAGCATTTAAGAAAATTAGACGGTGCAACCTTTATT  
TTAAATTGATCATGGACAAAACCTGACACATTCAGAATTATGTCACAGGTC  
GAATGGATGCTCGCAATTTGGTTAATTAAAAGGGAGTAGTGTATGATGGT  
GTTTGAGGGTGTTTTGCCTTATACGGTGTTTGGCACTGTAATGCAGATAT  
TTGCAGAATTTGAACGCGATCAGACATTTGAGTCAACATAGACCTTGGAA  
TGAGTTAGCAGTTCCAAGAGCATTCTGTAGCATTAGGGTAGAGACTGACA  
AATTTACATGTGCTTGACACGTAGTAGGTAGTTAATAAATACGGACTGA  
CATGTGGGTTCAAATTTAGGTTTGAAGTTTATGGGCCTATATGGGTTATTG  
TAACTGACATTGTGGGAGCCTTGTATATGCAATGTTTTAGTTTGTTTTAT  
TTGGACTAATTTATGCTCTGGAATGTGTTTTGGAATGATGACTTATCTGA  
TTCTGCTCTTTAGCTAATTAAACTACCAAGCCGTTCTAATTCCTTATAGC  
ACACAAAATGAAAGGCAATCTACCTGTGTTGGTTATCTATTATCCAGAAC  
CCACATATGACATGACAGTCCAGTTGTCTGTAAGAAGTCCAAATTTACCT  
GCAAAGCATAAAGTTATGTAGAGTCTGATATAATAATTCTATTCAGATGA  
ACAACACAGTGCCATGATTTTAGGAATTTTTTTCCACCTAGAAATTATAT  
ATACTGGTACCTAAGCCCCATCCAGGATTTTAATTTTGTGTGTGTTGGGG  
TCCAGGTATCAAAACATTATTTTTTAATATTTCTATTGACTATATTTGTA  
AACAAGTTTGAGAATTATTACTCCAAACAATGGACCTAAAAAGAACTTCA  
AACTAGATTGCTTTTCTATTTTTCACCTTAAAAGATTTTTTTCAGCACT  
CTTGATAGGGCGGTCTGTTTTTCAATGAGCTCATCTCTTGGGAAAACAG  
AAGACAGAGGTAAAAGGTGACTCGTGCACATCTCACAGGTACTGCTGTTA  
AGGCCGAGGGGATCTGCTTTAGCTCAGGCTAATGAATTTTTTAGAAGAA  
AACTTGAGTTAAATGTTTTACAAGTCATTTCAATTTATCCCTTCTGATCTA  
TAAACTTCAAAGTTCCCCAAAAGTTGCTTGATTCTAGGTATGAAATGTA  
TCTTGATTAATGACCTTGCTGTGTGTACATATGAGTGTGATATATAT  
GAATATGTGATATACGTATATGTATATGAGGCATACACATACTCATTTTC  
CTTTATAGCTAAATTTATGCATATACATATTTTAAGATGTTATTTATTTA  
TTTTAGAGAGAGCATGAACAAGGGGGAGGGGCAGAGGGAGAGGGAGAAGC  
TGGCTCCCCGCAGAACAGAAAGGCCCATGGGCCAGACTTGATTCCAGACT  
CCAGGATCATGACCTGAGCCAAAGGCAGACACTCCCGGACTAAGCCGTC  
CAGGCACCCCTATATTTTTTAAATCTAATTTACCTAGTCTATTTTCTAGT  
CATATTTGATTTTAATTCCCTGTATATAGTAATAATAAATTTAGCACTTT  
TCATTTGAGACTAAGACCTTTCCTATTAATGCTAACAGAATACTTGAAGA

TTTAGCGTTAATTGTGATAAATGTTGACATCAACTTTTGTTTAGTTGATC  
TTTGTTCCCTTTCCCCCACTGATGGACATACTGGCAGCTTGAAATAAATC  
CCTGTGAAATAAAGCTCTTTAACAGAAGGCAAGAGAGAAGAGGCAGAAAA  
GATCTTTACTCTCCTTATGAGTTGCTAGATAACTTAAACCAAACCTGAC  
TCCTTTCAGGCTCAACTCATAATCCTAAATAGCTTGGTTAAAGCATTGCC  
TGTGTTCACTGAGGAAGCCTCACTTCTCTGTGGTTAAGTGATTCTCTCAC  
CTTGGTGCTATAAAATAGCACTTAATACTCCTTCATACCATCCCCACAAT  
GCTTTTGGAGTTTGATAAATGGTACCACCTTAGAAATTTGTCTTTCTTGTT  
TTTCTGGTCTAGTAATCTTAACCGTCTTGGGTCTCTCAACTAATTCTTCT  
AGGATGTTTTTCTTCAGCTTTATGATAGCTATAAGAAGCCAGTTTTTTTT  
TTAATGTCTCTTTGCCTCTCTGAGTTGTTTCTGCTCCTCAGAAAGGCTCC  
AGTTTTCTGCCTTTACCATGTGTGGATGCCCATGGGGAAAAATCGTGTAT  
CTTCATTATGTCCCCTGGATGCTGTCTTGAATTCTCTCTATTATTCTTC  
GTACCACCGCTGACTCACCTGTGCTGCAGGAGCTCTCAGGTCTCCATATT  
AAGACAACACCATCGGTGACACTGAGTTTTCCCCTCCCCATGAGCATGGC  
TGAAATCAAGCCTTGAGACCGACAGCTCTTCTCACTGCTTGTGGTTCAAC  
TTGAAACCACAAGGTCCAGAGGCACATGGTTTAGATTGAGTGTCTTTCTC  
CAGCTAACACAAACCATTTGTTCAAGCAACTTTGGTATCTCTTTGAGAAT  
AAGAGACTTGCCTCAATGCTCCCCAGACAGTCAAATAAAATCTCTTGGCT  
TCAAGACAAATTCAGAAAATTTCTGCCCAACAATGGCATGCGGTTCAGTTT  
TTTTCGTTTATTTTTGCAACTTGTGAAGGAATGGGCCAATAGACTCCTTGA  
AAAAAAAATTTTAAATGCCAATCAAAGAAGTGGCAAATTAAGAAGTGT  
TTATTATGGAAAGTTCCCATATTACATTTAGGGAAAAATGGAAATAAAATG  
ATATCTCAAACAGGAAATAGAATTAGACGCCTGCCAGGAGCAGAATACCT  
GCCACTGATATTTTCCCCCTACTTTTCATTCTCCCATTTAACTGCATTAG  
GAATAGATACTGCTCATGGATCTTGGGGAGCAAAGCGAGACCTGTCTGAG  
AAAAGATTATGCTGTACTCCTTCTGGGAGGTGCTGCATCCATCCTGAATA  
AATTTTGCCTGTATAATTCAAGCCTGAACCTAATAAGTCCAACACTGAT  
GATTAATTTTTCCCTGAAATTTGGAATAGTAGAACAAAAAGATCATGTAA  
TAGTCATAATGAGATACACAAATGTATTTCTAAGATATTTTGTATCTTTT  
TTTTTCTATTGTAGTTTTTAAAAATTAAGATTTTAGGGGCACCTGGATGCC  
TCAGATCGTTAAGTGTCTGCCCTTCAGGTCAGATCATGATCTCAGAGTCC  
TGGGATTGAGCCCAGGACATTGGGCTACCAGCTGAGCAGGTAGTCTGCTT  
CTCCATCTTCCTCTGCCCCCTCCCCCTGCTCATGTTCTCTGTCTCTCTCTG  
TCTCAAATAAATAAATAAATAAATCCTTTAAAGAAATTTAAATTTTGAGT  
ATCTTTCGGTTAAGCCTTTTTCTAGTCATTTGACGCTGTTTGAATCTTAG  
CATAAAATAAATAAATAAATAGTACAGGAGGTACCTGGAGGAAAAAAATC  
AATAATGATGGCCAAATGTTTGATCCAATTGGAGAAATTTGGTATCCTT  
AGTGAAAGAGAAATGCTCCAATCCAACCATCTTGGTTTTGATCTCAACCA  
TCTTCTATATAGTATGCTACTTCCCATTTGTTGTTTAATTCAACACAAT  
GAGAATCTACAGAACCTTTTCCCCATGGTCTCTGGGATAGGCTCCAGTCG  
GGGACACAGACAGACCCAGCTCTTCACTGTCTTACTTTCTACAGGCTTCA  
AATGGTGTACATACAAAAGCATTGAATTATGTTGGAAGGATTCCCTTAAG  
CACTTCAATTACAAGCACTATGAAAAACCTGAAACACTGCCTTCACAGAA  
GAAGGGGGACTTGAGCTGGGACCACACTGTAAAAGATACAGTGAGATAGT  
AAAGGCAGATTTAAAAGGAAACCATATTTAAAAATGAAGGGTTTGTGACTT  
TTCTAAGAATATAGGGTCATGTGAAAACGTGGGTCAAGATCAGTGATAAT  
TACTATCATGTACATCACTACTTTCTCCACATACAGATGCTCGGGGTAAC  
AACAAAGCCTGCATCACATCTACGTTCCAAGGATGGAAAGAGACTTTTT  
TTTTTTTTTTGAGACTTTTGATTTTGAAGACGGGGTATGAGAAAAATCAG  
TTTAACTAGGATCATTAGACAGGTTTAAAGGACAATTATTTCTTCATTGCT  
TTGATTCTGTATATATTGAATTGTAAGGATATCTTAATGACAGTTTTATA  
TCTATCTACTTACCTATTTGTTTATCATCTATCTATCTATCTATCTATCT  
ATCTATCTATCTATCTATCTATCTATCTATCTATCTATCTATCTACTAC  
TATCTGTCTATATTTACTAAGCAGGAAGTGTGTAATGGCTTCACATGCG  
ACATACCATTGAATCTTCACCAAAGCTCTATGCTGGTTCTTTTCCCGTTT  
TACTGAGAGGCATTTAAGACCTTGCCCTGTTAAATAACTTGTTTCATAGTC  
ATGTATTAAGTCATAGAAAAACCGGGAGTTGCATCCAGGCTGAATGACTT

AACATCATGGGACCGCTGGTGTGTTTTTCATTGATGCATATGTGAACCAG  
GATATAGCACTGTTACAGCTTTTAAGCTCAAAGGAGGGGTGTGAAGGGA  
AAGAAAGTGAGGTATTTGAATCATAACAAGCAAACTCCTTACACTTGGAT  
TTTTGAGATGAGCTCCATTTTGTGAGGCATAATTAGCTTTGGACTAATTT  
TCATTACTTCTGTGCGAACAATGGTGCATCCGTTTTCCATATTTCTTTTC  
ATGGTGCAGGATATAGATTTGTGGTGGCAGATTGGAGTTTCCAAATTAGT  
CAGTCAAACCAATTTAATGACTAGGCTTGTAACCCATCTAGTGATCAGC  
ACTGCCGATAGAGAAGCTTGCCATTAAGAAAACACTCTTCTATTAGTTGA  
TCTTCGAATAGTGGTATTTCTCATATGTATCCTTTTGACAAAGGGCACAA  
TGCACTAAACTGGTTTATGTTTAAAAACAACCAAGAAATCTTTCTGCTA  
TGCGTTTCTATCTCCTAGTTAGGAATAAGTGACCATAAAAAATCCCTGAAA  
GTGTGAAACCACAATATATTTCCCTGTTCTATCATTAAGCTATTTCGTA  
GTATAAATGGGAATCAGAAGCAGAGGGCTGTGCAGAGGGAGAACAGCTTT  
AAGATTACATATAAGGAATTATTTCCCAGCAAGGATTGGTTCTGGAAATT  
TTGGTTCCTTGTTCTTTAACTGTTATGGGAATCTTGAAGAGACTTCTAAT  
GTTACAACCTCTTAAATTTCTGTATAGTACTGTATCATTTATATTAGCAA  
AATTGAGTTCATAACATCAGAGACTGATGTCACAAAAGTTAATGAAGTGAG  
TCTGAGACATTGGGAGATGAATATACTGTAGGTACAGTATCAGGAAAAC  
AACTTGGAACCTCGTGACTGAATGGAAGTACAGATTTAGCTTTTATGTC  
TGTTGTTTGAGCCCGTTGGCCAGGCATCAAGACCAGCATTGGGCTGAGCT  
GTTCAACAGAGTTTCCAAAGTGTACTTACTGAGTTTGTCTGCTGTAAATG  
TAAAACTTCGAGTCCAGGCTTGCGGCACAGAAGACTTTCAGACAGCAC  
AGTGAGTGGAGATGGTAAGCTCTGTGGATGTTTTTGATGAGAAAAAAAAA  
GAGGCGAATAGACTAACACCTAATTGGGAGTAATTTTATGTGTATGAAGT  
GTGGAGAGGACACAGGACACGGGACGTGTTTATGTATGCCTCAAAGTTG  
GGAAAAGACAAGCTTATTGAGTTCAAAGCTCTGTTTATTTTCGACACAGC  
TGCTTTGCAATCAGTCATCAATCTACTGTTTTGCTTAATTATGGTAGAAT  
TTTTTTTAAGAGACTCAACATGGACAGAGTCATTAACATGTCAGAATAGT  
AATGAGTTTGAGTTAAACGAAGCATATTTACTCCTCTCAGCAATAACATA  
TAAAGCCTGTAATATTGATAGATATTGATAAAAAAAGTCACAAGACGTG  
CAAACAGTCATTTGCATGAGCTGACACCATCTAGGATTGTGTGATAAGCA  
TAGGGGCACTTTAGAATACCATTTTAAGCTCACCTAAAAACAAGAAGTTGA  
AGACCAATAAGGAAGACTTAATGAATTAAAAATTGACTTCATTAGTTAC  
TGATTTTTGCAAGATTTCTTTATATAGGTGCATTTTGGTAATAAACTCGA  
AATTTTAGCTCACAAAATTGTGTCTAGCCTCAGAGATGTTGGGATTTATG  
TTTAAATAGAATGGTATACACAGTTCAAACCTGAAACAATCCAATGGAGA  
GGAAAGGGGAAACATCACTGGGTAAAGAAGATGTGCAAGTCTTCCGAAA  
TCCATAGGATAAGGATGCTCATGTAATAAAGAACATTCGAAGGAGGTTTA  
AAGCAAAGAAAGAGCACTACAATCAAAGTGAGAGGGCAAGCCGAGAGGTT  
ATTGGTAACAATCAGTGTGATTGCATGCATACTCCTCTGTGTGGGCATGG  
CTCCGAACATTCCACCTATTAATTCATTTAATTCTCTCCAATACTGTAGG  
GGCAAGTATGATTTTTATCTCTGTTTTAGAGATGAGCTGGCTAAAGCACA  
GAGAAGTTAAGTATTAGCTGAGGAACAGACGTCAAACCTGAAATCAAGA  
CACACTATGTTACAGATGGAAGATTTCAAGTGCTCAACATCTGGAAAGTG  
TCTAGTTTTGCCGAAACCAGAACATCTGATGGAGTCTTGATTTGCTTTGT  
AGATTATATTTTGCTTAAATGGAGGAATCATGGGTAGGAGCTGTTGTAC  
TTGATTTCTATCAATAAGAGACAGGAAAATTCATGGATAATGGGAGCATC  
ATGAGAACTTGAGAGAGAAAACAAGGAAACTAAAACATGTCACCCAGAGAC  
TAGATGATGAAAAAAGGTAATAATGGGCATAATCAGAGAAGACCCTTAGA  
TTTGAAGAACATTGATTAAATACAAACATTAAATATATGGACATTTCCA  
TGAACATTTATTTATTTATCTATCTATTTATTTATTTTCCATGAACATT  
TCTTAAAAGCACTTCAGCTCAGAACTTAATAGGGTATGTTCTTACAGAAG  
AATAGATACCCCTTCAGAAGAAAAGCAAAGGGTAAGAATAAGCATAGAAAA  
TTCTTCTTAGAGCTAGAGTCTCTAATGGCGGCAAACATGAAATACCATG  
GCTTGGGAAGTAAACATAATTTGTAGGCCATCCGGACAAAAGTGATCAA  
CATTTCTTAGGAGGTGTTTATCAGTTTTACTTTTTTGTGAGTAGCAAAAT  
CTACGCTGTGTTACTAAGGTGCATTCCCACTAACCAGGTGGATGAAGGT  
ACTTTACAGGGACTTATTAACAGGGAACGTGACCAAAGAACATTCTAAAA

TGGCAACTGTGTAAGTTTAACTACACAGTTATTTAGGTAAATGTCATATC  
AGTTCTCCCTATGAAGCCGACCATGTTATTTAACTGCATGGGAGAGTGA  
GTAATGTCTCTCTTCCAGTTCAGCTCTGGATTTTTCTTCTGTGTTTATT  
TTTCTCCTGTCTAACCTTCTGTTCTCCTTTGTTACTACTTGAACATCCT  
CTTCTTGATCCGAGGCCTCTGTTACAATTGTAATATGTTCTTAATTTGTT  
ACCTTTACATTTTCTCAAATTTTCCTTTGAAATACTCTGCCTTTATCAAC  
AGTTTCCCAAGGCTAGCTGCTTGGCACATTATGTGGGGGTATCTCTACA  
TAACGATGTAGGTCTTTATTTCTCTATCTGAAACATTCTCTCTTATGTTT  
TCTGTGTCCAGTGTTTCCATTATTATGGTGATGGCCCAGAATTAAATTTT  
CTCTTGTTTAGAAGAATCATTTTCTTGAGGAATATACTGAGAACCCATCA  
CCCATGAAGTAGCTCTGTGACTCTTTTTGTGTAACAACACTGAGTGCTTA  
CCTAGCTCTACCAATACATACATTTTTTGGAACAGAATATTTTTTCATTTT  
TAATATTAACATATTTATATCCTTTAGAAGAATAGTTGCTATTACCTATT  
GCTGATGATGAAGATAACCTCTCAAACCTTTACTGATGGGCTGTCAATTGA  
AGGAAACAATGTTTGGAAAGCCATTTTGCAACATTTGCCGAGACTATAAA  
AGTATTCATCTCCCTTGACCCTTTAATTTCACTTCTGGGAACTTATCCTA  
AGGAAATAACACTAAACACAGAAAATCTTTATGTAAACAGTTACACTATT  
TAACATAGCACGGTCTTGAGAGAGAGAAAACATGATAAGCACTCAATAATA  
TGAGAATCGTTAAATACAAAATAAAATATTCTTCGGCCATTATTATTGTG  
CTTAACATAATTTGCATTTGTACAAAATAGAATTTTGTGTAAAACCTGGG  
AGAAGATGATTATAAGTTACACTTGACTCTTGAACAAACAACACAGGGGT  
TAAGGATGCCAACTGTCCACACAGTTGAAAATCCATGTTGAGGGACACCT  
GGGTGGCTCAGTAGTTGAGCGTCTGCCTTCAGTTCAGGGCGTAATCCCTG  
GTCCAGGGATCAAGTCAGGGAGCCTGCTTCTCCCTCTGCCTGTGTCTCTG  
CCTCTCTCTCTGTCTCTCATGAATGAATAAACAATACTTTAAAAAAA  
AAAAAAGAAAATCCATGTTGAAGTTTGAAGTTCTCCACAACCTTAGCTAC  
CACTAGCCTACGGTTGACCAGAAGGAAGCCTTTCCAATAACAGAAATAGT  
CAATTAACATATATTTTGTATGTTATATGTATTATATATATTATAATAAG  
GTAAGCTGCAGAAACAAATGTTATTACAAATAAAGAAGAGAATACATTTA  
CAGTACTATGCATATATTTATCGAAATAAAATCCACATGTAAGTAGACCC  
GCACAGTTCAGTCTGTGTTGTTCAAGGGCCAGCTGTATATGTAGAATAT  
GATTATAGATATATAAAATGTGCACTGAAAGCAGGACGACAAAGCAGTAC  
TCCAGTATTTATCTGGTTGCCAAGAGTGATAGAATTAGTAGCAATCTCC  
TTTTCTATTTTTCAAGTTTATTGCCATGTCAACAGTGAGCATGTTCTATT  
TAAATGGGGACACACAAAAACAAGTTCGATTTTTTAAACAGTTTTCCTA  
AGTTAAGACTTTTAAGATGAAGTCTCAAATGATTTTTTGTGGTGCAGGG  
GATGGTGGTGTGCAGGGGAGGCAAACTGACTAAAATAGTTTTGAACTGGG  
GTGACTGGGGAGCATTAGCTCAATGAGGCAGCTTTATAAAGACTGGGTTG  
ACCTTCAGGACATTGGGGAGAGATGACCTTGAACACCTCAGACAACATTA  
AACTCCAGGTTACAGCTGACTGGAATTCTGAGGTTTTATTGGCCGTGAGC  
CAGTCTGCAGCCCACTCTAACACCCTAGTATTTTATAACATTGTAAAGA  
CTGTATTGTTTCAAACATTTCAAATTTTACACACAACCTGGCAGTCATC  
CAAAGCCATTTCCAATGGGCCAAAACCTATCAGCAGCCACCCACCTCCTTG  
GCCATGGTTGCCGTGATTAATGATGTTCCACCAACGGGGTCCTCCATTAGG  
ATCATCTAGGCTGGGAGACCCCAAGACAAATATGATCTTTGAGACTTGTA  
AATTGTCTATACATTTTGCAGCTGATTTTTTTTTTTTAAAGCAGAAATGGA  
ACATCAGAAAGCAGAGGTCTGGTGTGGTGTAGCTTGGATTGGCTGAATGC  
AACAGACTTTAATTCAATAAAAAAGCAAAGGATGCTCTTTGTCACAGACA  
CTGTTCCTACATCAGGATATTTGTTAGGGCATGTAACCTCTCTAAGCTAC  
TCAAGTTCCCTCCTCCCCAACCCCTCCCCCGTTTTTTTCCCATGGTCCCCTT  
ATCCTGACTTAAAGTTTATTACTCCATGGGCTTAGAACTGAAGTTTTAA  
AAAAGCAAATATGATATTAATATTCTCCATTGATGCTTTCCCTTTGGAA  
ATAAATAATTTACACATGACTAAGTGTATTGAGTCCCTCACATCATAAC  
CTTACTAAGTCATGTATGATAAGCCAGTTCTAAGTACTTTATGTATGAGA  
GCTCACTGAATCCTTGTAACAACCCCTATGAAGCAGTTACTGTTGTCACCA  
TTTAAAGGTGAAAAAGTGAACACGTCGTAGCAAGGTGAAAAATCTCAC  
CCAAAGTCATTACAAAGGTTTAGCATTAGTGAGCTAGAAAATGAGACAA  
ACTGAGTGGCTAGCGCATCTATGATGAACCATGTTGCCACATAAGGTTGT

TTTCAATCTCACATTTTCTAACAACATATCATCAGGGCTATTAGAAGTTTT  
ATGTAAAATATGTACCAAATATTTCTTTACTGCTTCACCAAAACAGAAGG  
TAGAAATTGTTTCATTGAGACAGAGATAGAAAGAGGGAGAGAGAGAGAGAG  
AGAGAGAGAGAGAGAGAGAGAGAGAAAAGGAGAGAGGGATTTTTCCAAACCT  
GTAGTTCAGAGAAAAGAGTGTCTTTAGATACTGGTACTGGTTTTTCAGTTC  
TCTAGGGAAGCAATAGCTTTGTTTCCTTGTTTTTCTTCTGACTTGAAAA  
AAAATATATAATATCTCCCTTGTTTCTCAAATTATTTTTGGTCTAACTGA  
TACATTAAGTGTGAGAAACACATTTATCACTATCATTAAATCCATGCAAC  
TTTGTTCCTTCTAGGAATGTTATTTATTAGGCTGACCTTGTAACAAACG  
GAGAGACAGTAAGGTGAGAGAAAAGAGTTGACTCATTCCCATCCTATAAT  
TGCGCACGGCCTTTCTGGAAAGCGGAAATGGGAATCAGTAAGATTTTAC  
TAATGGCCACTGAGACATTCCAGTCATTGCAGTCAATAGCTCTCATTCAA  
TTATATAAACCTCGACTATGCATTTTTTTTAAACCAAATTACAGTATATG  
ATAAAACGAGAGCCGCGAGCCTTCACAAAGTAGACTATCTAACACCATAAA  
AGGCCCCAGATGAGCCCTTTATTCCAACCTGGTTCCCTAGGTTGACAAGA  
TTCATCAGAAAATTCATCTCTTGTTTGGCTCTGCTTCTGTTTCCCTGAC  
ACAGATGTATTTAAAGGATTATTCATTTAGAACGTTCTGCGAATGATGC  
TCTCCATAGGGCTGGGCATCTCTGGTCTTGTTAACATGAACCTGGAGGAC  
ATTATACTAAGTGAAATTAGCCAGTCACAGACAAACACTATGATTCTGCT  
TATAGAAGGTCTCTGAAATAGCAGATTCCATACGAGCAGTGATAGAATGG  
GGATTGCCAAGGGTTGGAGGAAGTGAGAAATGGGGAGTTGCTGTTCAAAG  
GACATATAATTTAGTTACACAAGAAGAAATCTGATGTGCAACACTGTGC  
CTATACTTAGCAATATTGTATTGTACAGTTAAAAATGTGCTAAAGAGGCA  
GATCTTACATTAAATGCTCTTATCACAATAAAAAAGAAGAAAGGCAACAC  
GTTGACTGGCCTCAACGTAATGTCAAGGAGGAAAGGATCTTGTTCTGAAG  
GCATACATCATCTACCTTCTTTGGAAGCACAGTTTTTGCGCACACAATAG  
AAAGAATGAGGGTTTGGGCGGCAGTGAGGTAGGGCCCTGTCCAACACTTA  
GCAGTGGTTTGGGGGTGAGAAAGTTAAGTGATATGCAAAAACCTCGCTTC  
CCTCATTTGTAAAATGACTAAAAACAATACCTACTTTATAGATTTTGTAGCA  
GGGTAGAAATAATACTTAAAGATATGCAACAGGTTATCTAGAAAATAGT  
AGATCTTTAATAAAGGATAGTGAGTACTATTTTATGTGTGTCAATTTCT  
TGATCTTCAACCCCATGATGAGGAGGATGCAGTGGTATCTCAGCAGGCAC  
CAGGTATCATAAAGGAATGCAGCATGAGTATGGCATTTTGGTATCAAAAA  
AGCTATTTAATAGGACAATTAGTACGAGTAGAGGTAGGAATATCATACAT  
GATGTAGTACCACTCCTGTGAAAAGATCAGGTTTCACATGGATGAAGGAA  
AACATAGTACAGTTTACAGAAAAAAAATACTTGCAAGTAGTATTTAGT  
CCTTTTAGGAAGTATTTCCACTTCCATGTTTTTCCAATATACTCTTATCC  
AAGTAAACCATGTCTCCGATGGAGTTGAAACATAGATTAAAGTTAAACA  
TCATTACTGAAGAGTCAAAGGTTTATACTTACTGAAATATAATATTGTCC  
TTAAGACACTCTGAGTGTGGAAGGGATTGATCCCAACATCCTTCAAGTGC  
TGATGTGGTACATGCTTCATAGCAACGGGCCAGAAATTAACGTTTAAGGTC  
CAGACATAAGATAGTAACTCTACACCTCTATTAAACAATCCCTCATATTGT  
TTCAGGGCTTCCATCACAAGCCAATTAGGAAACCAAGCTTCTATTTAGGT  
GGCTAGTGTGATTTGTAAGTTGTTTTTCCATAGTGATTGTTTTGTCAAGT  
TAAACCTCAGTGCTCAGAGATTTCTGTGCTGTGAGCCTGAATGCATCTTG  
ATGTGTTTGCTTGCTGCTAAATCAGGGATCACCGCTCACCAAATGAAAATC  
TTTTTGTTATAGATGGAGCTTGAACAAGAACTTAGCCACTTGTTTGGAT  
AAAGAACACTTTGAACATTTGCTTATTACAGCAGTCTCAAACATTAGGG  
TAGGAGTTAAGCCCACAATTTTGTTTTAAATTAAGTGCTCCTAAAAAGCG  
TGAGACTAATAGCACCACTAAAGCCAGTTATTTTTCTGGCAAGCAATAT  
GTGAGTTTCCCTCATTAAGCTAAGCCAGTAAATTCAGCATTAAGTGGCA  
ATTTCTCTACTGTTCCAGTTCTTGCCCTGCGTCTACACAGCACCAAAATA  
GCTAGATGAAAAGTGAAAACCTCAGTTGGTTGTTAGGATGCTGCCAAATA  
TTAGAACATGGTGTATTATAAGTCATCAAGATGTTTCATTAGATTTTTTCC  
CTCTTTACCACATATTTTGGCAGTGTAGATGCCAATTTAAACTTTATCCA  
TAGGGGCGTTTTCGTGGATTATATAATATTCAACATGGAACAAAAGAAGGAA  
CACCAGGTATCTTTTCAAAGAAATGACTCAATCCAAATCTGTACTTTTTTC  
TATTTCTATTATTTTAAATGAAAATAATGTTTTGTATTGGATCTACCAA

ATCATGTATCTGAGTTTTTAAATCCTATCTCACCCCTTCCCTAAGCAGCC  
AACCAGATGATTATATATATATTTAAGATAGTCAGTTTTCAAAAGACAGA  
ATCTATCTATCCACAAGAGCAAACAATATTGAATATTTACTACATTTCAA  
GCACTGTGCTGGGTGTTAGACATATAAAAAATGGGGTATAGTTCCTGCTT  
TCTAGAGATAAATTCCTACTGGAGAGACAATATATTTATATAAATGAAGCA  
GATACAGTTAGGTATTTATCCAAAGGATACGAACATAGTGATTCAAAGGG  
ACACATATGCTCCAATGTTTATAGCAGCAATGTCCACAATAGCCAAAATG  
TAGAAAGAACCCTGATGTCCATTGACAGATGCATGGATAAAGAGGATGTA  
GTACACACACACACACACACACACACGCACAAACACACACACACACTGGA  
ATATTACTCAGCCATCAAATAGAATGAACTCTTGTCATTTGCAGTGACTT  
ACATGGAAGTAGAGCGTATTATGCTAAGCAAAATAAATCAGAGAAAGACA  
AATATCATTGTGATTTCACTTGTATGTGGAATTTAAGAAACAAAACAGATG  
AACATAGGGAAGGGAAGGAAAAATAAGATAGAAACAGGGAGACAGGTAAA  
CCATAAGAGACTCTTGGGATGCCTAGGTGCTTCAGTGGTTGAGCATCTGC  
CTTTGGCCGAGGGTGTGATCCTGGGGTCCCAGGATCGAATCCCACGTCCG  
GCTCCAGGTGCATGGAGCCTGCTTCTCCCTCTGCCTGTGTCTCTGCCTCT  
TTCTCTCTGTCTCTCATGAATAAATAAATAAATATTTTTTAAAAAACA  
TAAGAGACTCTTAACTCTAGGAAAAAACTAAGGAACTAAGGGTGCTGGA  
GGGGAGGGGGCATGGGTGCGGGTAACTGGGTGATGGGCATTAAGGAGGG  
CACTTGATGTATTGAGTACTGGGTGTTTATGCAACTGATGAATCACTAAA  
TTCTACCTCTGAACTAATAGCACAGTATAGATTAATTGAATTTAAATAA  
TTTTTAAATGCAGGAAAAAATAAAAAATATAATATTTGATAAAACAGT  
AAACAAGAATTGCTACTGAGTATAGTAGAGCAGACATCACAGGGTGTGCG  
AGAGATTGCTAGAGCTTTGCTAAGGATGGAAGATTTGTTGGGTATCATAG  
AAAAGTGGGGACTTTGGCGAGTAAAGAAGAGAACAGGGGACCTTCCAGCC  
AAGGGGAAAAGTAAGGTGTCAAGATAGGAGTGACCACTTTATCCATGTTT  
GCTTTGAACATTGTCTAGTTTTAGAGCTGAAAGTTCTATGTTCCAGAAAC  
TTTTCATTCATGGACAAAGTAGGATGGCTAGTCACCCTAGTAGGTAGGGA  
TGAACATGACAAAGCCAGGAAACAATGGGCGAGTTTAACTGGAGGATTCA  
TTTAAGATGGAATGGAAGAAGAACTGGAGAGACGTGGTTTGCACCATG  
TCAAGGACTTGTGTACCTATTGGGGCATTGAAATGTAGTCTATGTTCA  
GTAAGGGAAATTATGAATATTTTTTAAGTTCTCTGCAGTCCATAAAGAAT  
TTTTGAGAGATCAGTCATAGTATGTAGATGCATTAAATCAATTCATTTAT  
TAACGTATTTATCGAGCACCTACTGTGTGCTATGTGTTGTTCTAGACATC  
GGGGTGCCGCAGTCAGAAAAACAAAAGTTTTTGTCTCGCAGTGCTTAC  
ATTTGGTCTGTGAGAAAAAACAACAAGTAATTATATAATGATACATCA  
GTGTTCTTGATAAACGAAATGGGATAGATGGACAGGGAGTGATGGGGGAC  
AGGGTTCTATTTTAGGTGCGGTACTAAGAAATGATCTCTTTGGTAAGACT  
GCATTTGAGCAGGGGCCTAAATGAAATGAAAGAACAAGTCATATGGATGA  
TCAGAAGAAAAGCATCCCAGATAGAATGAAAGTACATGCAAAGGTCCTGA  
GGCAAAAACATGCTAATGTGTTGAAGAGCACAGAGGAGGACCCTGTGCC  
AGTAACAGAACAAGTGGAGCTAAGAGTTGTAGTTGCTTAGGACACTGGGA  
ACCCCTCTTGCAAGGTGGCCAGCTCTGGCAGGACCTATGGGCATTGAAGCCT  
TAATTGCTTTTTCAGTGAGCCTGGGGCACAGAAAACAGATTGGAGGCCGAC  
TCAATATGACAGGCATGACTGAGGAGAACTGGAAAATAGGACAGGATGGA  
TCATACCTAAGAACGCCGGTACTATATTTTTGCAAGAAGGAATTAATTTA  
TAAACAATGAAATAACAGTGTGCTTCCAGTGAGAACAGATATTACCCACC  
TTTCTGCCTCAGCCTAAGCTACCGTAAAAGGCCATTTATTATTTTTTAAA  
AAATATTTTCAGAAGGAAGTCTCTGTTGGGCACATTTTGTGTATTTGA  
TTTTATCTGGGGAGATTTTTAATTAGAGCATTAAATTGAGAGGGAAAAAA  
AAGAGGAAACTCCTGTCCCGTGTTCATGGGTATGTTAAAGTCTAAAGGT  
TGTATAACAGTTATGACTCATTTTCATAGTGTGAGTTCTAGTTCACCTAAA  
CACACACACACACACACACACACAAAATGTCATATTGCTTGATCCTCC  
CAAGTATATTATTGTGTATGCCAATAATTCTGCTTGATTGGTGCTTTTCA  
ATATTATTCTTTTCTCCCTCATTTTTGGAACAGGATTTTTTTTTAAAGATT  
TTATTTATTTGTGTGTGTCTGTGTGTGTGAGAGAGAGAGAGAGAGGGAGA  
ACAGGAGCGGAGGGGAAGGGGAGAAGCAGGCTTCCCACTGAGCAGGGAGC  
CCGACACAGAGCTCCATCCCAGGGCCCCAGGATCATGACCTAAGCTGAAA

GCAGACTGCTAACCTACTGAACCCACAGGAGCCCCAGGAACAATTTATC  
TTATTTCAGTTGAAGAATCACACATTAATACCATTTTAGGATTGCAAGTTT  
AAATCTCCATAATTCAAGAATGTGAAATACAGGGTTCTTATAACAGCATT  
CATTTCCCATCTTTTTTTTTTAAATTATTGATTTATTTTAGAGAGAAAAGG  
AGAGAGAGAGCATACAAGCAGGGGAGAAGCAAAGGGAAAGGGAGAAGCAG  
ACTCCCCGCTGAGCAGGGAGCCCACTGCAGGGCTCAGTACCAGGACCCTC  
ATCTCATGATCTGAGCCAAAATCAGGTGTCAGTTGCTTAACCAATGGAAC  
CACCCAGGTGCGCCCCCAATACTTTTTATGCCTTAAAATAAACTGTCCAT  
CTAGAATACTAGCCAACAGTCCAAGAATTCTATGTAATCAATGTGGACAA  
GGTAATGTTAGTAAAAAGATCTCGCCTTCGTATTTTCTGATTTGCTTTTC  
GTTTGATGCTTTTAATTACATTTTTATTTTGAATAATTATAGATTTCAT  
GCGCGGTTGTAAGAAACAATAAAGGGAGAGCCTTTCCCCAGTTTTCCACA  
AAGGTAACAGCTTGTATACTATAGAGCAATAGCCCAATAATGAGAATATT  
GACCATGATATAGTCAGAAAGACAGAAAATTTCTGTAAACCCAAGGATCCC  
TCCTGTTGCCTTTCTATAGCCAGACCGGTGGCTTCCCACTCCCACACCCT  
CCTGGATTTCCAGCGACCACTAATCTCTTCTCTATTTCTGTAATTTTATT  
TCAATATTATAAATGTTACAAAAATGTAGTATATACCCCTTGGCCCTTTG  
GGATTCTTGGCTTTGTTATTTTTTGTGTTGTTGTTGTTTTGTTTTGTTTTGT  
TTTGTTTTTTTCATCCAGCATAATCCTTTGGAGATTCATCCAAATTGTTG  
CATGTATCCACAGCTTGTTCCCTTTCTACTGTTTGAGTGGCAATCCATGCT  
ACAAAAGGCATACATTTGTTTAAACCATTCTCTGTAGAAGGACCTCTGGGC  
CGTTTCCCATTGTTGGGCTATTATAAATAGAGCTATTGTAAAATTCACATA  
CATGTATTTGTGTAAGTTGAGTTTTTCATTTATCTAGGATAAATGCCCAGG  
AATACAATTATTGGGTCTCTGGGTCAATTACAAGTTTAGTTCTGTAAGACC  
CTGACGTACTGTCTTCCAGAGTGGCTGTCCTATTCCGTATTCTTGAGGAC  
TGAGGGTCCTGTTGCTCTGCATCCTCACCAGCAGTAATTTTACTATTACT  
GTTATGGTCGTTTTAATAGGTGCATAGTGGCATTTCGTTATTGCTTTGAT  
TTGCAAACCCCTAATGATATGAAGTTTAAATGTCTTAATCTACTCACTTTC  
CATCTGTATGTCTTTGGTGAGCTGCCTCTTCCTCTTCCGGAATATCGATG  
AATGTTAAGATCTTTTTCTGTAGTTCTGCAGGTTTCTGAAACTCTATCCT  
ATTTTCTTTTTCAGTTTGTTTTATCTTTGTTTTTCAGACTGGGTCATTAT  
CATTGTTCCATCTTCCAGTTTCTAATTCTTGCCCTTGCCCCCTCCATGC  
TGCTCTTGAGCCAATCAACTGAGTTTTTAAATTTTGATTATTAATTTTC  
ATTTGGCTCTTCATTATATGTTCTATCTTTTGGCTGAGACTTTCATTTTT  
TCCATTTATTTTTAGAATATTATTGCTCATGGAAACATTTTATTATTTAT  
TATTATTATTATTATAATGATAGCTGCTTTAAAATTTTGTTAGATAAAT  
CTAGCATGTCAGTATTATCTGTTGTCCTTTTTTTCATCAGTTTGAAATCC  
TCCTGATTCTTCCTGTCATGAATGATTTTTTTAATTGAAATTTGGGGTAC  
AATGTTATGAGAACCTGGATCTTATTTATATCTTCTGTTGATGACTTT  
TTTTGACACTGCTTTCACAAGGGAAGTAAGGGTCATGCTACCCCACTACT  
AACAGGTGAGGGTAGAGGTTTAGGCTTCTTCATCAGCCTTTGCCTGTGGG  
GCTAGAGATAAGGTCACAGTATTTTCTGGAGCTTTTGAAGTAGAGAAGAGT  
AGTTATTGCCTAAAAGTGTTCTTTCCTGCCAGGCCATGCTTTTCCTGGCC  
CTTTGGAGAGAGAGACTTTAATTGGGGTTTCTTGTCCTGTATTCACTGG  
TGTTGATAGATTGCTGGGTTCTTCAACTCCAAGTCTGGGATATGTGAGGC  
ATAACCCCAACCCCATCCACAAAATTCAATTTTTTGATGTTTCTTGGGT  
CCAAAGGCCCATAGTCCATTATAACCTTTTCTGTCTACATTTGAGAGTCC  
TCTTATGTTTGTCTTATATATAATACACAAGGGTTTTTCAGTTGTACTTAG  
CAGAAAGAATAGGGAAGTATATCTATGTCATTTCTGAAATGGAAGTCT  
CTTTCATCCCTTCTGATCCAACAATAAAGGAGCAAAAATACTGAATCATG  
GTAATAAACAGATACAGCCTCATCTGAGATCAAAACAATCATCTCTAGCT  
CCACAGTTTCAAATGGTGCTTTGTAAAACCTCTATTTCTGGCATTTAAGCC  
CCTTTTATGTCCCTCACATACAGTATCTGATGGACCTCTTACCTGGAT  
AATCCATCACCACTAAGAGTGACTGCATTAAAATATAATATAATGATTA  
AAAGTGCACTTGTTTCTCTCCCGTCTTCAAATTTTCATCAATTTCTTTTTC  
CGGTGTTAGAGTTTATGTTCTCAGAGCCATCCTCCTACTACACCCCCAGG  
TTCGGAGCCTCCGCACCGCTGTCTGTGATGCCTCACCTCATCGCTCAAG  
TCCATGCTGTCACCAAATATGTTGTTCCCTCCTTTACATTCTTCCTCACAC

TCATGTGTCACCTTTCCAAGTCTAATGCCATCACATGAGCCAAGATCTTTG  
ACTTATCTATTGAAATATCTTCTTCCACGTTCCCTCTGTTGCCATCAGAG  
TCATGCTCTGATACATTCTATAGCATATAGCATCTTTCTGAGCCAAATG  
ATTATTCAAGTTTTTAGCTTATCAATTCCCCACTCCTGTGGCTTGGCTTAT  
GCAGTGACACCCTATCCTTCTTATCTCCAGATATTTAAGGGTTATGCTA  
TTATGGGGAGCAGACCAAGGAACTCTTCTGAAAAGTCCCTCCTGATCCT  
ACCAGCCATAGGCAACCCTCTATCTACCTCAGACCACACGTCCATTTTG  
TTAGTAACCTTTCTATCGTTTTGTATTATATGTGGCATCTCCTTGAGAACA  
AAAACCTCATCTTATTTATCTTCATTTTCTTCTTAAAGTTTCACCCCAAAC  
ATCATATGTAGTAGCTATTAAAGTTGTTGAACAAATGAATAAAGAAAAGG  
AAAAATAATTACAAAGCTTGTCTTGATATTTTCTTCTTGTCTTCCTTTC  
CTGTCACTTTTGTCCCTTTGGTCTCCTCAAAGTGACAAATATTCAATCTCAA  
TGACTCACAAATATATTAAACTTCATGAGAGGATGTTGCCAAGTGAATAA  
AGGGCCCTTGAGTTTAAATATGTTCTAATAGGGAAGAGGAAGCCAATAGA  
TAAAAATGTTTCTTCTGTGCAGGTGAGAAGGGGCAACTCTGTTTCTGTT  
TGTGAAAGGTATAAGTGAAAGTGCAGTGCCTAAGATGATACAGTTGATGAC  
AAAGAACATCATCTAACTCAGTGGCTTCCAAGTTGTCTCTAGGTAAC  
CACAATACAGCCACATTAATATATCAATCCAAATATGTAATTTTAGAAGA  
GCACATAACCTCTAAAGAGAGTTGCAGACAAGGTTTTTGCTCAATAGTGA  
CTCATCTTAGTAGCTGACTTTTTTCTTGGATTCAACCAAGGAACCTCTGA  
GTAAGTTGGCTTTGCCACGTCCCAAAGAGACCCAGGGTAACTCTCACTCA  
GCCTTTGCTGTGAACAGAGACTATCAGGTCACCTAAGAAACAGCAATTTG  
TGGGCTTCTGCTTTATGCAATGATGACCTTGGCTTGCATAACCCAAATAG  
AATGTGCCCCAACTCATGAAGTCAAGGCAATGTGGTAAACAGAGCTTGTG  
CCAACAGGACATCATTTCAACATCCTCTGGCATATAAAACATGTTTGGGC  
AGGGGCACACACATCATAAGCTGTATTTTGGTATGGACAATCTGGGAACT  
CAGTGGCGACTATGTCATAGATCCATTAGCTTCATAGAGACAGCCTCTGA  
TGTTACGTTAAGTCAGCTGCTTGTTAAACCTCTGAAAAGTCACTAAAAAT  
GGGTGCTTTTGAATAACAAACAAATGGTTAAATGGTATGGAAAACAGAAG  
AGATGGCCAGCTATTGGATGAGGAGTTAAGTAACACACTTTTTTATGAAG  
CTATTATGGTAATGATGGTTGGTTTCCAATACAGAATATTGTTTTGTACC  
AATTGACATCAATTGGGTACAGCCAAAGTATCTTGGAGTTTTAAGAGTAA  
AGGTGAGTATTTTCTCTTAAACATCACCCTGAATTTATTTCTATTGAA  
CACTTCCCAGTGCAGCCTCTAATAATAAACTGGATAGACATAACCTGAAA  
TGTGGTCCCTGTATAAAGCCCTAATGCTTTATTAATAATGAGCATCTAGCC  
TACTATTTTATAAAATTGTTTGCGACTCTAATAATCCAATTGCTACATGT  
TGTTGAAAACCTTTTAGTTAATATTGAATGCTCTAAGACCATGTTGCAAG  
GAATGATCTTTGAGGCATTTGGACATAGTAAGTTACAAGGCACAGTAAAA  
AGAAACAAAACAAAACCAAAACTCAGTAAATGCTTGTATTATGTGGACTT  
GCTTTGACATCATACTAAGATCCCAGGAAAACCAGGTGCTTACAAGTTGC  
CAACTTTCTTAGTTCTCAAAATTTAGTTTACCTGGGTCTTTCCAATGCTT  
GAATAGATTATATGTAAGCACTAGCTACCTACTCAGAATATTTTGCTGAA  
GAGTATTATATTTAGGGGAAAGTTACAGCTCAAAAATCAACCAATAAAAT  
GTCACACACTTTAAATATCATTTGTTGTTTTGTAAAAGATTGAGGGATGTA  
AAATTCAGAGCAGGTAAATACAGAGTAATAGCTTTACAGAATCAGTGATC  
ATTTTTTCTCCCTACCCTGGCAAGAGACATCTCTACCCAGTCATCACTGT  
GGTTTGACATTTCTCCTGCACCTAATAGCTATTTTTTGACCAAAAAAAAAA  
AAAAAAAAAAAAAAAAAGAAAAAGAAAAAGAAAAGAAAAGAAACCCACC  
ATAAATAAATGAAGATTAAAAGTGGACTGTGGACTCTAAGCTGTTTCGTAT  
AGTTACATGCAGGAAATATGAACCTTGGAAATACAGACTTTGTGCCTTGGT  
TCTTATTCTACTTTTGATTCTCAGCTTTCTGTCTTTGGGGCAGGTTTTTA  
AAGATGATATTACATCTCTAAGGCCTAATTCATACAAACATTAGCTTATG  
ATGGATAAAACAAATGTGAGATCTTGTAAATAAATAATAGCACCATTTC  
TATGAACCAGAACACTAAGAGACCTGAATATAAAATCCAATATGCTCAGA  
AATATGGGGACCGTAACCTGTGGTAAGAAAAGATGTGCCACAGCGAGTTCA  
GAAATGTGATTTAGCAAATGATCCAGACCAAAAAGCATTTTAGAAAGAGA  
GCTCTACTCTCTGAATCAATTTCTAATAGGTGATTTGCATTTCTAAGAAG  
CTCATATGAATTTCTGGGGCCATACCCTGGACCATGCACAGTAAATCTGA

TTTGAGTAGGAATATTTTGCCATATTTGATGAATAAATATATTCACATTT  
TTATATGCAGAGGTGATCATTGGTGTCTCTATACTATTTTCAGTCTTTACT  
GGTATTCATGTGTCAGAATAAGTAGAAATGTTGAGATTATGACACATTGGA  
ATTTTGAAACACTATCACTAATATATACTGAATGAAATTAAAACCTCATT  
TATCCATAGTTCCATCAGAGAATAAACTGAAAATTATAAACTTTCTAAAT  
AGCTGAAGTGTATCACCTGGTGAATTTTATGTTGAATTTGAAACATTTTA  
CATTGAAACCTTAAAATGTATTAAATCCTTCTCTACCTTCTTAAGGAGTA  
TGCTCTGGACTATGTATATGAGCCTTCATGAAGTTAAACATCTCTATGAT  
ATTCAGGCCCTTGAGAAAAGGAAGAACATCGAATTATGTGGTGTGAGGAT  
ACAGCATGTTGGTTTTATGTGGGCTTTGTCTTGTTACTTTATCCATTGAA  
AACAAATTACATTGCGTTTTAACTGATGTTAATACCTTAAACAAAAATTAAC  
TGATGTTAATACCTTAAACAAAAATTCTGTGTTGCTTATACAGTTTATCT  
AACTGGTTTTATTGTGAGGGTAAAAATAAAAACACACGTGCATTGAACTTCA  
TATGTGCTCAATAAATATTAGTTAATGTAAGTGGATAATTTTTATAGATA  
GAGTTCTCTGAGAGGCGTCTCCAAGATGGAGCCTGGGGTGCAGCACATC  
TTTATGAAATGCCCTTGAGGTCAACACCTGTGGATGGCAGGGGAAGACAG  
CAAGGGCGGGCAGATGGAAAAGTCCAGTGCCAACCCAGTCTGGGTTCGCA  
ACTGAGGCAACCTCTAAAGGGTCAGAGTGTTAGGGCTAGGACCAGGACGA  
TGTGGGTAAAGCAGTCTCCTCAGTGTAATAATTTAAGGGGGCATCCAAAC  
TCAGTGATCAAGATAACTAATACCTTAAGGCAATATTTTTTAAAGTCAAA  
TTTCATGCATGCATGCATGCAAAAAAAAAAATCCACCGTGAACAAAATAT  
CAAAATTTAAATAAAGCCCAGCTGTTTGTGTTGATGGCCCTGTGATGGAAA  
TCATTTCCAATCAGACAGTGGTCCCTCAGGCCTTCACAGGTATGGAGTCTT  
CACTGGGCAGGTTGATGACAGTTGACAAATGGGATACAAATTGCAAATAG  
ATTGGGCAGAGCCAGGTTCTATTTATAGTCATGTTTTGTTTTGTTTTCA  
TTTTTGTCTTTTTTTTTTTTATGGGATAGCTTCTGTTAAATTTTCCACTTG  
GTTCAAAATATGGAGGGATATTTTGATACAAGTATATGGGGGCATGCACT  
TTGCCTTTTGCTTCGGGATCCTGTATGGCTGAGTATCCAAGGCTATCTGC  
CAGAGAATTCCCAGATTCTGGGGCAACAAGTTCATTGAAATGAAAGTGTC  
TTCTGCCGCTTTCTCTATTGCTGAACGATCGAAAATATCATCCAACAATG  
AAGTTTTGATTTATAGTAAATGATGAATATACTCAGCTCCAGATTTTAAG  
TTTCACCTCAGGTAAAAAGAATGACCAAACCTCATTTGTCACTTATCAGTA  
TCACTTGCTAATATTTAATATATTAGATATGGCTGGACATTAGCTTTAGG  
TTACAAATGAGTGATTTGGCTTCTATCCTCTTTTTTTTTTTTTATTAAACA  
AACAAACAACCTGCATACTAACCACCTTACCGGTTTCCCAGAATTCTAATTT  
CCTCCTCTGTACAATGAGGAAAAGCTAAAGTAGGTAACCTTTTTCACCTCT  
TAGCCAACTTTCAATTCTAAATACTTGATGGTTTGCCCTTGTTGAAGATGA  
TCAGAGGTCGTCCTTGAAGAACAGAAATTTTAGTTGTGCTGTGAATCTAG  
CAAATTCCTTGAAACTGCACTCCGTAGAGTTGATTGCTACTATCCCCAAA  
GGGCTCCGGCCCATCAGGTGTTGTGAGTGATTGCTGTTTCCCATAAATGCC  
CTCCCTGTGTGGTCATCAGGGTATCAGCTCTTATTAATTGGTAGTATAAT  
TATGCTTCATCCTAATGATCTTCACAGCCAGTCTACCTATTGTCTTAGG  
GTACTACTCAAGATCAGCTCATCAGCTTGATAAAGCTGCCTCCCTGGTGT  
TAACTAAAGAGGTAAAGAGACTGGGATGAGGGTATGGTATACTCCCAAATC  
CAGAGCAGAGTGACAGGTTAGATCTTCTGAGAAGGTGGTAAACAAAACCT  
GTGAGTATTTTGTAAATGTTTCATTTTGTGTGCATATTTCCCCAGAAGG  
ATTCCTTGTCGAAGGCACATCTATCATCATACACTTAGAGAAAAGCTGGTG  
TAATGTGAAAGTAAAAACACTTGAAGGAAGAAGTCACTGGCTCCATAAG  
TATGCATAGAGTTTCATCGTAGGATCATCTTTGCTCCCTACTTTTGGA  
TTTGCCCTAGGATCGAGATGGCCAGAGAATCAGGTGCTGATTTTGTGAAGC  
GTATAGGATTTCAGACATTGATTTTATTACATAAAAGAAGTGAAGCCAAG  
TGAGTAACAACCTGATGATTAAAGGACTCTTGTATTACTCTGTTTTCTGTGC  
TTCACAGAACCTGAATGATTATCTACCAGCAAGAAGTGTGTTTTTAATTG  
CATTGTCTCAAAATGTCAATATGTAACCATGAGTATGTTGATTCCCTCTG  
TTCCAATTCCCTAATCTAAAGAGGAAAAAATGGTTCAATTCATAAGTGGT  
TTTCAGGAGGAAGTAAATTCTCAAAGTGCAAAGAGTGATTGATTAACAGT  
GTTGAGTTTGTGTTGTGGGAGAACTTGTCTGACTTGTTATCCTGGCTGTCT  
GAGTAGAATGCTTTGCAAAAAAAGAAAGACAAGAAACACACACACACA

CACACACACACACACACAAACCATGCAGAAATGTCAACCAAACAAACCAC  
ATTGGGAGCCCACTCTTGAGACTTGATAGCCACAGCATATTCTATAATGT  
GACTGGTCAGGGCTTGATGTACAGAATGTGCTTGTAATCTTCGACAATTT  
CATCTTTTCTTTCAATACTCATGTCACATTTGTGCTGCACCAGTGCTTCT  
GAGACCCCTTTAGAAGAGGCAAGAAAGTAAGTCTAATAGATAAAAAAATCT  
TTCTGTTTTATAAAATTCATTTGCTGTGGAGAATCTTACCAAATTAAATG  
TATATTTATCTTTATATAAGTTGAGTACTCATTTTCATAAGCCAAAGGATT  
TGGGTCAACATATACAGATGGGATTATGCTTGAATATGGTATTTTTTTTGT  
GTTATGTGAGGGGACACTTTAAACTGTGTGGTTTTTAAGAAGCTAAAGCCT  
ATGCTAAAAATACCCTACTATATTAATAGGAACCTATTGACTATACTTAG  
GAATGCCCTGATGTCAAAATAGTTCGCCAGAATGCCACAGTGTGTTGCAA  
GAGAAAATAATAATTAGCATTCAATGAGCCACATAAGTCTTACATTTAAC  
TGCTATAACCAATATATATATATATATATATATATATTTCCAATTATATATT  
ATGTAAATAATATATACATTATTTAACATCAGGCTATCTCTTTAAAACCTT  
ATTTATTAATTTACCTGTTTTGCTTGTTTTATTGTGAGCATAAAATCAGAAT  
CTGAATGATATTCATTATTTGCATTGGTAAGTTATACAGTAGAAATTATT  
AAGTAAGTGAGCAGTAGGATTTTTATATATATATGTAATTTAATTTATCCAA  
AGGGGTATCAATAAAAATTAATAAAAGATCATATAGCTCAATTTATCCAA  
AATGACATGATAATTAATTCAGATTAATATCACATTAAGTGAAAATAGGC  
AAATATACTCAATTAATGCAGGATGATCTCTAATCATTCTGTTTCTTCTT  
GTTCTCTGGAGTTCTCTATTATTTGAAGTAAATTTAGTAATTTGAAAGC  
ATCATTAAAAACCTTGTTCTTGGGACCCTTGGGTGGCTCAGCGGTTGAGCA  
CCTGCCCTTCAGCCCAGGGCGTGATCCTGGAGTCCCGGCATCGAGTCCCAC  
ATCAGGCTCCCTGCATGAAGCCTGCTTCTCCCTCTGCCTGTGTCTCTGCC  
TCTCTCTCTCTCTCTCTCTCTCTGTGTGTCTCATGAATAAATAAATAA  
AACCTTAAAAAAGACTTGTTCTTATACATCTAATTTATACTTAATTTTG  
AATAATTCTAGCCCCCCCCCAAAAAACAATAAATCTATTGAACAGGAT  
CATTTTGCTTGCTTGCTTCTTTATTATTTGAACAATGATAACAATACAGC  
CTCATACTTAGAATAAATCCCATCTGATTCCATCAACATGTCAGATATGT  
ATAGAGTCCTGAGTGCATGGTTTTGAGGTCCATCAAAAAGATGGAAACCT  
TGTCTGAACATACCTGTCTTTTCCCTGATGGGGTCTTGGCTGAATCTTATC  
CAGTCTGGGTGATCTTAAGAAAGTTTTACAACAGAACTGATCACACTGGT  
GTGGGAGGTTTCGGGAAAACCTCAAGGAACAGGGCAATTCTTTGGGACTA  
GATGGAGCAAGAGTAAGGAGCCATCCCTGGAACCAAGAGTGAAGAATGTT  
CCAGAGAGATTCTTGGGGTAAGAGCAGTAACTACCTGAGCATCCTCAGCA  
AGGAGGGAACCAGGGTGAGAAATATTTAACCTCATTTTCTTCCTCTCTT  
CCAGTCTCTCTCCAGAGCCTCCCAATGGTTGAACCCAAATGGAAGTCGGA  
GGGCAAAGGGATTGTGGTTGTAATATTTATGGGTCTGCCTCTCAAGACAC  
TCAGCAGGGTGGGCCCAGATGGAGAATGTATCTGGAGGGGCAAACCTAAT  
CCAGCACACCAGAAGATACTTCTCTAGAGTAGCCTATTAAATGAAGTAAA  
TTTTAGTCATTGTGAAATATCTTTCAAATCTTGTTTCATATGCATTTAATT  
CATATATAGTTTTGAATCATCCCTCCACACACACACCAAAAAACAATAAC  
AACAACAACAACATTGCAGTGTGCTAGTTTTCATCCAGAGATGGGCTAAAA  
CTCTTAAGGGAATAGAGAATTTAATCCTTATAAGTCCAATTTTTCATTGAA  
TCACTTAGTATGGCTACAAATGTTGGCAACAACATACATAGGAGAAAAAT  
ACTCCAGTGAAGCTTAGTAGCACTTTGAATGTCTTAAAAATTGTTTTCAA  
TAAATATCATTAAATATGAAATTTGATTCTATCAACTAAGGAACACATCCT  
TTTTATTAAAGTATTCCTGCATGACAGAACAGGCTTTGCACTGAAGCTTAG  
CGAAAGTCTTGCATCTACCTTCTCTTACCCAGATGTCCTTAAGTCACTTA  
CCCTCTCAGACCTAAGTTCTCTTTTCCCTGAAAGAATTATCACAGACGTTGC  
CTTCATTTTCTTCAGGGACTTTGGAGGGAGCAGATGACACAGAACATAAGA  
CAGCAATTTTATATGCTCTATAGTCTATAAAATTTTCATCAGAGTTGGTAGA  
TCAGTTATTCTTACTTGAAAAGTACAAAGAAAAAAGTACAAAGAAAAAA  
ATATCTTTTCTTCAAACCTGAAAGGAAGGATTGCCCTCCTCAGTCTTTTT  
ATTTTGGCTTTTTTTTCCCCCATAGTGAAAGACCAATATAGAAGTTAAAA  
ATAAGTGAGGTGAAGACAGACCTCCTGCTGTACACATTTTCCAAAGTCT  
CAATTGTAAATATGATAATAAGTTATTAATCAATCTTTGTTTATTTTAA  
TGGGGTAACTATTCTCTGTGGAATTTGTTTCAGACCGTATAGGGAAAACCC

TTCAGAGTCTCCCATATGAAGGTTGCACATTCAAATAATAGCCAGCGTTT  
GTGGAGTTTTCCTTCTTGGCCAGCTAAAAATTCCCCCTGGCTTGGGAGAGC  
ATGAAGTCTTTAGTGAGGATGTCAACAGTGATTTATTATAAGCTGAGTTA  
ATTCTCCCTCAATTTAAAGGCCTTGCATGCGACATAATCACTTTCTTTCC  
CCCCACAGAGGGAGCTGCTTATTCCATGATTCTCAAGACAGCTTCATCC  
AGACACTGGCCATGGTGAGATTTCAAATGTTTTCTTTGGAAATTTTTGTT  
GTGGGGGTTGGGGCATGGAGTATAATTAGTCAAGTATGGTTCTCACCCAA  
GAAAGCTTCAATGTGAAAAAACAAGATGTGTGTATTTGTGTGTGTGTGT  
GTGTGTGTGTGTGTGTGTGTCTGCAAATGTATTAATGTAACCTCTGTGTGTG  
TCTTTATGAAGCTTAGGAGAGCTTCTTGGCAGCAGAGCAAGGAGAAGTCA  
TAAACCCAGCCTTGGGTAATGTACTAGTTAGACTTTTACTGTATTGGGTT  
GGTTGTGCTTTTGTCTTTCTTGGCTCATTAACTGGATAGAGGTAACGGA  
AATCTAGAGAAGGTTTCAAGAGATGAGCCCAGAGAACTTCAAAGTCACAAAA  
GACCTAATAGCAATATTTAGGTAGTAGAAAACATGGAGAGGTGTGAGGTA  
CTTGGAGACTGTGACAATATCTTTAATCACATGAAGTTCTTAGATGCCAG  
TAACTTAGTCTTCTCCTGTGTTTCTGGAGACACTAAGTAAAATTAAAGAG  
TTTTAAATCATAGCTGTCATGGCCTAGTCGTTGGCAGTGGGGTAATGAGT  
ATTCATCAACTGCCATTGACAAGATTGTGATCCTTCACTCTGAAAGCTC  
TGGAATACTAAAATCTGTAATAAGGCAAAATTGACGATTCTCCATCTCCT  
CTGATTTTATGCCCATAGATTTTCTACTCATGTTTTGTAGTCACCAGAAC  
TACCTGCTTATGGCAAAGTTGCTTTTGTACATATAGTAGAAAACCTCCT  
CATTATAGCTTAGATTA AAAAAGGAAATGTAGTGGAAAGGCCAAAGACAG  
GAAGTGTGAGAATGGGAAGAGGCCCTTGCACAGAGTAGATGTTGCTTCTCT  
GTGTCCAGATGCTGTATGTGCAGGATTTCTCTCTGTAGGCCCTCCAGAT  
CCATTCTCTACCCTTTTCCACTCAGCACCCTGCTCCTGCAGGCTGACCTG  
TATGGATGTTATCACATGATTTTCTTGCCCTCTGGGTCTGGTTGGCGTC  
ATCCAGTGGGGAATCTTGGTAGAAGATTAGAGATGAGGAGAGTGAAATTG  
AAATATTCAGTACCCTCCAGGAGATTACCTCAACTGGTTATATCTACCA  
CTCAAAGGAATAATCTTCTGGAATGAGCAGATTCAAGTATGAGGAGCTAC  
TAGAATCACTCATTTCCAGTTCTATTAACCTTCTTTAGGCCTAAGGTTATT  
GTCAAATCTTGTTAGTCAAATCTCCACAAATTACCTATATTTGAATGCAG  
CATCTATTTCTTCCCCAGACCCTGACTAATATAATCTCTTCATCTCTCTT  
TCTGTGTCTCCTTAAGTCTTCTCTGCCTTTGTGCCCACTTCTCATTATTT  
CCCTCCTCCCATATGGGAAAGAGTACCATCCCAACCCCTTTATATCTTCT  
CAGTTCATGTTCCAACAGAACTCAACTCACACAGCAGTAACTAGTGGTTT  
TCAGTATATCTCATTCTCTTTTCTAAATTGTTTAACCATATTTTCACATT  
TAATCCCAACAACAGTCCACAGGTTCTAATATCATACAATTTTATAGATG  
AGGACATTGAGGCACAGAGAAATTGAATAACCTAACACGTCACATAACTC  
AACATAGAAGCTGAATTCTAACCTAGGCAGACACATTTCAAATACATGT  
TTTCAAATACATTTTGGTAGTTTGTGCTTGGTCTGGACCACCTTGGGT  
TGCATGACCAATACTGATTCACTACAATGAGGTGGAGGTGAGAGGACAAG  
ATACCATGATGTACTTTCTAGTGAGTTGGACCTTCAAGACAAAGCTCTCT  
GAATAGGTACTAGGTAGGGCAGTAAAATGGACTAAAACATTGACTGTATC  
TCACCAGCCTGGCCATAGATAATTACATTTTTTTAAGTGATGCTTTGAAA  
AAGTTACCAGAGAAGTTTACAAAATACTGCAACTTTTTAAGTCTTTTTGC  
TGGTTTTATGTAATTGTCCTTGCAATTCTCCAACCTCCTCCAGACTTGACTT  
AGAGCAGACTCCAAGAAGAATCTACCTTATTTAGAATGGAAGAAAAAGAA  
TAAACACTATCTGCCTTCTCCTTACAGTAGATATTTGATGAGTGCCTCC  
AAACAGCATACTATATTTCCCCCAATGACATTAGGCCTGAGCATCTTTAC  
CAGATTCTTCATGAGATACATGCAGGCTATGGGCACAACTGTTCTACCAC  
TGACAACTGATGCTTTCTGTGTACATGGAACAGAAAAAGAAACAGCATT  
AAAGCTTTGCAGCATTTTACCATTCTATTGCCAGCTTATACTTTTTTATA  
CCCAGATTTTTCTATATAGGTCAAGGTATTAGATGGTTTTGATCCATGTTT  
TTAAATCTCATTACAGAGCCATTACTATAATTCCCTCTGTGGGAAACAGAA  
CACAAATAAATGAACTCTGACCACTCCCCACGCCAAAAAAAATGTATAATC  
TGAAATAACGTACCAGAGAGTATGTCCTAAGATTGTTTTTAAATTTATAC  
CTTTGTAGTTGTATCTAGCTTTAAGATTAAAGTGAATTCATGATTCTACTG  
CTGCAGAAAGGGAAAAGGAACTATACTCTCCTGGAAAGATGACATCATT

TTACACTTTTATTCCAAAAGCTGCTTTAGGGAGCAATGAAAACATAAAAAAT  
CGTGATAAGGAAGACAAACTCAAAACCTGACTTTTTCAAACGAAATACGT  
TGCATAAAAAATAAGTGAATCTTTTTTCTCTTTGGTAACTCTGTTTGT  
ATGTAATCAATGATACTGCCTTTATATTTCTCTCTGAGGAGCTAGCTCC  
ATGAGTTTTAGAGAATGTGTTGTATTTATCATTATATTTTCAGCACCTAG  
TCTGGTGCCTCACACATAGTAGATGACCAATACTTTTTGTTGAATGAATA  
AATGAAGTGTAATGCCAATACAAATATAATACTAATTCCCATATGCGCA  
TATCTTTAACCATTTCTTCTCTCGGTGATGATGTAATATACTAGGAAAGT  
TAAATATAAGAATGTGAACATGGGGGGGAGGAGCAAGACGGCGGAAGAGC  
AGGGTCTCCAAATCACCTGTCTCCACCAAACCTACCTAGAAAACCTTCAAA  
TTATCCTGAAAATCTATGAATTCGGCCTGAGATTTAAAGAGAGACCAGCT  
GGAATGCTACAGTGAGAAGAGTTTCGCGCTTCTATCAAGGTAGGAAGACGG  
GGAAAAAGAAGTAAAGGAACAAAGGCCTCCAAGGGGGAGGGGCCCGCGAG  
GAGCCGGGCTGAGGCCGGGGCGAGTGTCCCCAGGACAGGAGAGCCCCGTC  
CCGGAGACGCAGGAGCTGCACCGACCTTCCCGGGCGGAGAGGGGCTCGCG  
GGGAGGTGGAGCAGGACCCAGGAGGGCGGGGATGCCCTCGGGCTCCCCGG  
GACAGTAACAGCAACTGCGCGCCCAGGAGAGTGCGCCGAGCTCCCTAAGG  
GCTGCAGCGCGCACGGCGGGACCCGGAGCAGCCAGGAGGGGGCTCGGGGGC  
GGCTCCGCGGAGGGGGCTGCGTGGAGGAGGCTGCACGGCCCCGGGAGCAG  
CTCGGCCGGGCTCGGGCAGAGGAAGAGGCTCCGTGCAGAGGGGGCTGCGC  
GGTTCCAGGAGCAGCTCGGAGGGGGCTCGGGCGGGCGGCTCCGCGGAGGGGG  
CTGCGGCCCCGGGAGCGCGAATCCAACAGCGCAGGCCCCGGAGCACAGGGC  
GCCGGGACACAGCCCAGGATCCCGCCTCCCCCGGGACAGGCAGAGGCCGG  
GAGGGCCCAGGACAGCGAGGAAGCTCCTGCCCCGAGCTGAGCAGATCAGC  
GGCCCCGCCCGGAGCCTCCAGGCCCTGCAGACGGAGTTCTTGCCGAGC  
TGAATCCAGGTTTCAAGAGCTGCCCCGCCACTGGGGCTGTTCTCTCTGCG  
GCCTCACGGGGTAAACAACCCCCACTGAGCCCTGCACCAGGCAGGGGCAC  
AGCAGCTCCCCCAACTGCTAACACCTGAAAATCAGCACAAACAGGCCCTC  
CCCCAGAAGATCAGCTAGACTGACAACTTCCAGGAGAAGCCAAGGGACTT  
AAAGAACACAGAATCAGAAGATACTCCCCGGTGGTTCTTTTTTTGTTTTG  
TTTTGTTTTGTTTTGTTTTGTTTTGTTTTGTTTTGTTTTGATTTGTTT  
CCTTCCCCCACCCCTTTTTTTTTCTCCTTTCTTTTTCTTCTCTTTTTC  
TTCTCTTTTTTTTTCTTTTTTCTGTTTTTTTTCTTCCCTTTTTTTTTCTC  
TTTCTCTTTTCTTCTCTTCTCTCTCTCTCTTTTTCTCTTTTTTCCCAA  
TACAACCTTGCTTTTGGCCACTCTGCACTGAGCAAAATGACTAGAAGGAAA  
ACCTCACCTCAAAAGAAAGAATCAGAAACAGTCCTCTCTCCCACAGAGTT  
ACAAAATCTGGATTACAATTCATGTGAGAAAGCCAATTCAGAAGCACTA  
TTATACAGCTACTGGTGGCTCTAGAAAAAGTATAAAAGGACTCAAGAGAC  
TTCATGACTGCAGAATTTAGAGCTAATCAGGCAGAAATTAAAAATCAATT  
GAATGAGATGCAATCCAAACTAGAAGTCCTAACGACGAGGGTTAACGAGG  
TGGAAGAACGAGTGAGTGACATAGAAGACAAGTTGATAGCAAAGAGGGAA  
ACTGAGGAAAAAAGAGACAAACAATTAAAAGACCATGAAGATAGATTAAG  
GGAAATAAACGACAGCCTGAGGAAGAAAAACCTACGTTTTTATTGGGGTT  
CCCGAGGGCGCCGAAAGGGACAGAGGGCCAGAATATGTATTTAAACAAAT  
TCTAGCTGAAAACCTTCTTAATCTGGGAAGGGAACAGGCATTTCAGATCC  
AGGAAATAGAGAGATCCCCCCTAAAATCAATAAAAAACGTTCAACACCT  
CGACATTTAATTGTGAAGCTTGCAAATTCCAAAGATAAGGAGAAGATCCT  
TAAAGCAGCAAGAGACAAGAAATCCCTGACTTTTATGGGGAGGAGTATTA  
GGGTAACAGCAGACCTCTCCACAGAGACCTGGCAGGCCAGAAAGGGCTGG  
CAGGATATATTCAGGGTCCTAAATGAGAAGAATGCAACCAAGAATACT  
TTATCCAGCAAGGCTCTCATTTCAAAATGGAAGGAGAGATAAAGAGCTTCC  
AAGACAGGCAGCAACTAAAAGAATATGTGACCTCCAAACCAGCTCTGCAA  
GAAATTTTAAGGGGGACTCTTAAAATTCCCCTTTAAGAAGAGGTTTCAGTG  
GAACAGTCCACAAAAACAAAGACTGAATAGATATCATGATGACACTAAAC  
TCATATCTCTCAATAGTAACTGAATGTGAACGGGCTTAATGACCCCATCA  
AAAGGCGCAGGGTTTCAGACTGGATAAAAAAGCAGGACCCATCTATTTCG  
TGTCTACAAGAGACTCATTTTAGACAGAAGGACACCTACAGCCTGAAAAT  
AAAAGGTTGAAGAACCATTTACCATTTGAATGGTCCTCAAAAGAAAGCAG

GGGTAGCCATCCTTATATCAGATAAACTAAAATTTACCCCAAAGACTGTA  
GTGAGAGATGAAGAGGGACACTATATCATACTTAAAGGATCTATTCAACA  
AGAGGACTTAACAATCCTCAATATATATGCTCCGAATGTGGGAGCTGCCA  
AATATATCAATCAATTATTAACCAAAGTGAAGAAATACTTAGATAATAAT  
ACACTTATACTTGGTGACTTCAATCTAGCTCTTTCTATACTCGATAGGTC  
TTCTAAGCACAAACATCTCCAAAGAAACGAGAGCTTTAAATGATACACTGG  
ACCAGATGGATTTACAGATATCTACAGAAGCTTTACATCCAACTCAACT  
GAATACACATTCTTCTCAAGCGCACATGGAAGCTTTCTCCAGAATAGACCA  
CATATTGGGTCACAAATCGGGTCTGAACTGATACCAAAGATTGGGATTG  
TCCCTGTCATATTCTCGGACCATAATGCCTTGAAATTAGAACTAAATCAC  
AACAGAAGTTTGGAAGGACCTCAAACATGTGGAGGTTAAGGACCATCCT  
GCTAAAAGATAAAAGGGTCAACCAGGAAATTAAGGAAGAATTA AAAAGAT  
TCATGGAACTAATGAGAATGAAGATACAACCGTTCAAAATCTTTGGGAT  
GCAGCAAAAGCAGTCCTAAGCGGGAATACATCGCAATACAAGCATCCAT  
TCAAAAAGCTGGAAGAACTCAAATACAAAAGCTAACCTTACACATAAAGG  
AGCTAGACAAAAACAGCAAAATAGATCCTACACCCAAGAGAAGAAGGGAG  
TTAATAAAGATTTCGAGCAGAACTCAACGAAATCGAGACCAGAAGAACTGT  
GGAACAGATCAACAGAACCAGGAGTTGGTTCTTTGAAAGAATTAATAAGA  
TAGATAAACCATTAGCCAGCCTTATTA AAAAGAAGAGAGAGAAGACTCAA  
ATTAATAAAATCATGAATGAGAAAGGAGAGATCACTACCAACACCAAGGA  
AATACAAACGATTTTAAAAACATATTATGAACAGCTATACGCCAATAAAT  
TAGGCAATCTAGAAGAAATGGACGCATTCTTGAAAGCCACAACTACCA  
AACTGGAACAGGAAGAAATAGAAAACCGGAACAGGCCAATAACCAGGGA  
GGAAATTGAAGCAGTCATCAAAAACCTCCCAAGACACAAGAGTCCAGGGC  
CAGATGGCTTCCAGGGGAATTTTATCAAACGTTTAAAGAAGAAACCATA  
CCTATTCTCTAAAGCTGTTTGGAAGATAGAAAGAGATGGAGTACTTCC  
AAATTCATTCTATGAGGCCAGCATCACCTTAATTCCAAAGCCAGACAAAG  
ACCCACCAAAAAGGAGAATTACAGACCAATATCCCTGATGAACATGGAT  
GCAAAATTTCTCAACAAGATACTGGCCAATAGGATCCAACAGTACATTAA  
GAAATTTATTCACCATGACCAAGTAGGATTTATCCCTGGGACACAAGGCT  
GGTTC AACACCCGTA AAACAATCAATGTGATTTCATCATATCAGCAAGAGA  
AAAACCAAGAACCATATGATCCTCTCATTGGATGCAGAGAAAGCATTTGA  
CAAAATACAGCATCCATTCTGATCAAACTCTTCAGAGTGTAGGGATAG  
AGGGAACATTCTCGACATCTTAAAGCCATCTATGAAAAGCCCACAGCA  
AATATCATTCTCAATGGGGAAGCACTAGGAGCCTTTCCCTAAGATCAGG  
AACAAGACAGGGATGTCCACTCTCACCCTGCTGTTCAACATAGTACTGG  
AAGTCCTAGCCTCAGCAATCAGACAACAAAAGACATTAAAGGCATTCAA  
ATTGGCAAAGAAGAAGTCAAACCTCTCCCTCTTCGCCGATGACATGATACT  
CTACATAGAAAACCCAAAAGTCTCCACCCCAAGATTGCTAGAACTCATA  
AGCAATTTGGTAGCGTGGCAGGATACAAAATCAATGCCCAGAAGTCAGTG  
GCATTTCTATACTAACAATGAGACTGAAGAAAGAAATTAAGGAGTCAA  
TCCCATTTACAATTGCACCCAAAAGCATAAGATACTAGGAATAAACCTC  
ACCAAAGATGTAAAGGATCTATACCCTCAAACCTATAGAACACTTCTGAA  
AGAAATTGAGGAAGACACAAAGAGATGGAAAAATATTCCATGCTCATGGA  
TTGGCAGAATTAATATTGTGAAAATGTCAATGTTACCCAGGGCAATATAC  
ACGTTTAATGCAATCCCTATCAAATACCATGGACTTTCTTCAGAGAGTT  
AGAACAAATTATTTTAAGATTTGTGTGGAATCAGAAAAGACCCGAATAG  
CCAGGGGAATTTTAAAAAAGAAAACCATATCTGGGGGCATCACAATGCCA  
GATTTCAGGTTGTACTACAAAGCTGTGGTCATCAAGACAGTGTGGTACTG  
GCACAAAACAGACACATAGATCAGTGGAACAGAATAGAGAATCCAGAAG  
TGGACCTGAACTTTATGGGCACTAATATTTCGATAAAGGAGGAAAGACT  
ATCCATTGGAAGAAAGACAGTCTCTTCAATAAATGGTGCTGGGAAAATTG  
GACATCCACATGCAGAAGAATGAACTAGACCACTCTGTTTACCATACA  
CAAAGATAAACTCAAATGGATGAAAGATCTAAATGTGAGACAAGATTCC  
ATCAAAATCCTAGAGAAGAACACAGGCAACACCCTTTTTGAACTCGGCCA  
TAGTAACTTCTTGCAAGATACATCCACGAAGGCAAAAAGAAACAAAAGCAA  
AAATGAACTATTGGGACTTCATCAAGATAAGAAGCTTTTGACAGCAAAG  
GATACAGTCAACAAAACCTCAAAGACAACCTACAGAATGGGAGAAGATATT

TGCAAATGACATATCAGATAAAGGGCTAGTTTCCAAGATCTATAAAGAAC  
TTATTAAACTCAACACCAAAGAAACAAACAATCCAATCATGAAATGGGCA  
AAAGACATGAACAGAAATCTCACAGAGGAAGGCATAGACATGGCCAACAT  
GCATATGAGAAAATGCTCTGCATCACTTGCCATCAGGGAAATACAAATCA  
AAACTACAATGAGATACCACCTCACACCAGTGAGAATGGGGAAAATTAAC  
AAGGCAGGAAACAACAAATGTTGGAGAGGATGCGGAGAAAAGGGAACCCCT  
CTTACACTGTTGGTGGGAATGTGACCTGGTGCAGCCACTCTGGAAAACCTG  
TGTGGAGGTTCTCAAACAGTTAAAAATATACCTGCCCTACGACCCAGCA  
ATTGCACTGTTGGGGATTTACCCCAAAGATACAAATGCAATGAAACGCCG  
GGACACCTGCACCCCGATGTTTCTAGCAGCAATGGCCACGATAGCCAAAC  
TGTGGAAGGAGCCTCGGTGTCCAACGAAAGATGAATGGATAAAGAAGATG  
TGGTTTATGTATACAATGGAATATTACTCAGCTATTAGAAATGACAAATA  
CCCACCATTTGCTTCAACGTGGATGGAACCTGGAGGGTATTATGCTGAGTA  
AAGTAAGTCAGTCGGAGAAGGACAAACATTATATGTTCTCATTCATTTGG  
GGAATATAAATAATAGTGAAAGGGAAAATAAGGGAAGGGAGAAGAAATGT  
GTGGGAAATATCAGAAAGGGAGACAGAACGTAAAGACTGCTAACTCTGGG  
AAACGAACTAGGGGTGGTAGAAGGGGAGGAGGGCGGGGGGTGGGAGTGAA  
TGGGTGACGGGCACTGGGTGTTATTCTGTATGTTAGTAAATTGAACACCA  
ATAAAAAAATAAAAAATAAAATCAGTTTTTACCATAAAAAAAGAAAT  
GTGAAGATAGTTCAATTTTCCCATGTTGAATAACATCTGGGCAGAAAAGG  
ACAAATATTATATGGTCTCATTCATTTGGGGAATATAAAAAATTAGTGAAA  
GGGAATAAAGGGAAGGAGAGAAAATGAGTGAAAATATCAGTGAGGGTGA  
CAAAACATGACAGACACCTAACTCTGGGAAATGAACAAGGGGTAGTGGAG  
AGGGAAATGGGTGGGGGGGTTTGGGTGAATGGGTGATGGGCAAAGAGGGG  
GGCACTTGGAGGGATGAGCACTGGGTGTTATGCTATATGTTAGCAAATTG  
AACTCCAATAAAACAATTTTAAAAAAGAATAAAATCTGGGGTTCAGTA  
CAGATTGCCATGATGTTTAAATTGGGGATTTTGTGACATTGAAAATAAAAA  
TTCTTATTTAGGATCAGACCTGAAAGTCATGGGTGATGCATGATTATGGC  
ATTAGCAACAAAGTGAAATTTTCCAAAGATGATGAACTATGCAGACCTA  
TTCTCTCATCTCCTAGGAAGATGCTTATACCAACTTGTAATGAGATGAAA  
CCGACATGTTATTACAACAGTTTGTACCTCGTGAAGATGATACTATACTT  
TTAGCCCCCAGCAATTAATTGAAGATGGGAGGGACATGAAGGGGGACAGA  
AGAGAAAAAATCGTGTGGGGGATTACGATACATATAAAATGCAGATCTT  
CTGTACTACTGAAGCCTTGACTGGAGAGTGGCCCATGCCAAGTTCCTTAA  
GCAAGAGGGCCACATGGTAGTTGAGTGAAATTTGATGTTTTGCTTAGTTG  
TCTCAGACATGTTTACTTTAGTAGAGGGTTATGGAAAGGTTGAATCAATA  
AACACTTTCCTTTTTCAGTCAGCAGACTTGCCATGGACATCAGGAATCATGC  
TTAAATGAACTGGTCTTTCTCCATGAATGGAGGCATTCTTATTTTTTT  
TTGGGGGGGGGGAGAAAATGTGATCTGATAGATACTAAGCACTAATTAGG  
GATTTGACCAGATACTTTGATACCTTTCATTTTATTTTGAACAAGATCTT  
GAGTAATGATAAATGACAACTCAGACAGTAAGATTGCATTCTAATCTTCA  
TCATCATTTTGGATAAGAAATAATAAGTAAATCATGTAATTATTTTATGA  
CTTCATCTGGTACTATTTGCATTAAATAAATCTCAATGACCTTTCTAA  
TCTTATAGCACTAGGTACAAATGTATTTTAGGTCTTCCATCCTAGTGTT  
GTCTTAATCTTTCCATACAGGAGTCTTTTATAAAAGAGCAAATTTAATCA  
CCCAACATAGCATTGTTTTACCTTATGTCTCTAGTAAAAATCAATACAAA  
CAAAATAAAACACCAAATATACAAAATAGGAATTGGGAGCCTGACAAATA  
GCCACGGAAAGTTTAAAAACAAAATGGAAAGAATGATTTTTTTTTGAAAC  
TGCAACTATCACATATGAAGAAAAACAGCAAAAAGAAGCATATTTTTTA  
GCCCTTACATTTCTCTTTTCCCAAATTTACCCTATTGATTATGCAGGGT  
GAGTAAAAAATTCATGCATGCAACCTTAATTCCGGAAGTCATGTATAAAC  
ACATGACAAGCTTAGAATCTTCTGTCTTCCGTTGGCATAGCAGTCTGCT  
GTAATATACACACATAACAAAGCCACTCATTGGGGAAGTTGAAAACAATA  
CAATTTTATGGTGTGTTGCAGTTTGTGTTTCAAAGAAGTTTATTTCTTATTA  
TACCTTTGACGTCCAATCACCGTTATCAGCCCTAAGAGTTCAGTTTTCTG  
CAGACAAAAGCTTTTAGACATCTCCTTGGACCTAGTCCAGCTTGACTATA  
ATAAGGTGTTTATTTTATTTCTTCTCCTGTTTTGCTTGTTGAGTGCCAC  
AGCATACAGGTGCACATCAAGTGTTAGAGATTTTCCCTTGTTCTTGAAAC

GGAAAAAACTGACGAGGAAGTACTTAGTGAGTTGGAAAAGACCCAAAAG  
CAGGTGGGGAGGCTGAACCATGACACTAAGATTATCACTGCCAGTGAAAT  
CCAACTGGGTAAATTGATCTCTTCTAGATTCTGGAGTCAGATGGGAGAGA  
CAGTGAAGGTAGGTGAGGCCAGGTATCCAGACCTAGTAAGAAGTGGAGGC  
AGCTGATTTCAGGATGTGTTGAGGAAGAGACCAACATGTTGCTAAAGGAAA  
TGCTCCAGCAACCTGGACTGATATCAGCAAAATAAGTAGAAAACAGTCCC  
ATACTGCATGTTTTAAACAATATGTTAAGTGCAGCAGAAGCAGCTGAGAA  
TATATTTACAAATTTTTCTTTGCAACCAAGTGGGATTCCAGGATGATTTT  
ATTGTTATCTTTATGTTTACTTTTACTTTTTTCATTTTAATTTGTTTAGTA  
TTGGTGACAAGTTTGTAATGAACCGTCAGGGTTTTATCCTGGCCTTTATT  
TCCATCCTTCCAGCTCTGTTTTTCCCATGTCTCCTAATGAACAAAGGCTG  
CATTTCTTGAGAGCCTTGGAAGTGAAGAGAACTAACTGAGGAACTATG  
TAAGAAAATAATCGTGGATAGATGGAAAGATGAAGGCACAGAGTTGTTTC  
TGACAGCCCGATAGAGAAAAATTGGAAATGTTCTAAAGTTGAATTTTCAGG  
ATGGAGCTCAAATACATTATGGTACAGCTTAATGGAGCGACATTCTGCAG  
TTATCTAGAACAATGAGATGGGGGTGCCCAACTGGCTCAGTCGGTCAAGA  
TGTGACTCTTGATCTTGAGTCAAGCCCCACTTTAGGCACAG  
AGCTTACTTTAAAAAAGTAAATAAACACTAAATAAAAAATAAAATTCCTC  
ACTATCAAGAAAATACAACAATGAGGTAGAGCAATATGTATTGTTATCGG  
GCTCACTTGTAATACATTTTAATTTAGTGTGGGTTTGTATGTTTTTGAAG  
AAAAATATAAATCAAAATGTTAGCAGTACCTCACTCCCTTGGTGGCAGGAT  
TATGAATGACTGCAAATGTAGACACACATTCTCCCAATTCAAACCCTCCT  
ATCAGATAATGAAGTCTATTTCTGCACCCCCAGACTCTGGATTGGCCATG  
TGAATTGTGTTGCCACAGACCACAGGTTTACATGGTTAAATGAGGTGCT  
CAGAAAGGGCTTATATACTGGACTTGCCATCTTGCTTCTCCTGGGAACCC  
TGCTACTGCCACCATGAGAACAAGGCTGGATAGATTGGCTGGATAATGAG  
ACACTTATGGGCCACTTACCCCTAGGCAATTCCAAGAAGGGGAGTCCCTT  
AACTTACCAGCAGCAGAAGAATCTCCCAGGTACCTAGCCCAAATTGCTGA  
CCTGAGGAGATATAAACTAAGTAAATGATTGTTATTTTGAGTCATAAAGT  
TTTGGGATGATTTGTTATGCAGCAAGAGCTAATAGAAACCCTGTATGCTT  
GTGTGCTGTGTGTGTGCACATGTGCATGCATGTGCATGGACACACAGGT  
TATGTTTCTGGAAGGATATGAACCAAACCACTAGTAGTATTTTTCTTTT  
ACTTTGGGAGGTAGAGTTATGGCTGAATTTTACTCTTGTTTCTCTGTACT  
TTGTTTCTTCTTTTTCTTCTATTTCTAAAAAATCATGTTTATCCATGT  
GATTAAAAACAAACAAATGAAAAAGAAGGAAAAACCTAAATTAATGA  
GACCATCTTTTTTTTTTATTATTATTTTTTTATATAGAAAGGACTAACTTC  
TAGGCATGGTAGTTTGCTTTGTCTGTTTTTCCAAAGCAATTTTTCTTGAT  
AGTCCTATTAACCCATCAGATGGACATGCCCCCAGATATTATTGTTAAAA  
TCATAGGAACCCTGATAATACCAAATGCTGGCAAGGATGTGGAGCAACAG  
AAATTTTCCTTCATTGCTGGTGGGAATGTGAAATGGTGCAGCTACGCTGG  
AAGACAGTCTGAAGTTTCTTACAAAATGAAACATGCCATTATCATACCA  
TCCTGCAAACCTCTGCTCCTTGCTAACTACCCAAAGAGATTCAAAACCTAT  
GTCCACGCAAAAACCTGTACACAGATGTTTAAGGCAGCTTTACTCATAAT  
CGCCAGGCTTTGAAAGCAACCAAGATGTCCCTCGATATGTAAGTGGATAA  
ACTGTGGTCCATTACAGATAATGAAATATTATTTATTGCTAAAAAGAAATG  
AGCCATGAAGTCATGAAAAGACACAAAGGGAACCTAAATGCAGGTTGCCA  
AGTGAAAAAGAAGTGAAAAGAAGTCAATCTGAAAGCCTGCATACTGTATG  
ATTCCAACATACATGATAGTCTGGAAAAGGCAAGACTGTGGAGATGGCAAA  
AAGATCAGTTTTTTTACCCATATTAATGGATACCTGTCACTAAACTTTTGT  
CCAAACCCATAGAACGTACAGGATGGGGTATGGACTTTGGGTGACAATGA  
TGTTGCAATGTAAGCTCCTCAGTGGTAATGTGTGCCTCTCTGGTGGGGGA  
TGTTGACAGTGAGGGAGGCTGTGTAAGTGTTGGGGAGAGAGACCCTACGT  
GAAATCTGTGTCTTCCCCAGTTTTTGCAGTGAACCTTGAACACCTCTAAAG  
AGAAAAATCTTAATAATACAAAAATGTTCCCCCTCCCTACAAAAAAGCA  
TAGGAAAAGTAGATATGGAGCATATCTAGATGGATACCCTTAGCTTTTC  
CCCTGCATTGGGATTTCTTTGCCCTTCTTTTCATTGCTGAAATTTTTGAAA  
AATTAAGTGCCTAATACACATGACATTTTCAAGGCATACATGCTCATAT  
TTCTCAGACTTTCATTTTATTAATCATTGATACAGACACAGCACAAAATT

GAGAAGATGGGACATTTGAAAAACACTTTGGAGCTTGAAAGATTTGATAC  
CAGAAATGGTAACACAGGTGGCTGAGGAAGATAATGGAAGGCCAGGCACAG  
GGTTGAGTGGTGAAAGAAATTTGCAGAAGCAGGAAGGCGCTTGCCAGATA  
GGAGCTGGGTAGACTTCTACGCACTGTGCCTTGAAAATGGATACAAAGCT  
TATTACACTCATCACATTTTTTAAGGATGAGTGAGAATAAAGAAACCACA  
ATTGAAATGCCAAGCAGCCTACCAGTGAACCACAAATATCTTCTGAAAGA  
ATAAGCTCACTTTTCATACTTTGTGTAGTTCGACTGTATTTTAGAAATTCC  
CAGAAGTTTTTACCATCTCATACTTCTTACCAACTGTCTTTTTATCTCGAT  
TGTCCAATGGCTGCTTTATGGGCTCAACTATCGATTATCAGCTCATCGAA  
GGAATATTCCATTACAGGTAATTTTGAACAAGTTTCTTACTTTTGTCT  
GAGCCTTTGTGGTATCTGTAAGGCTTAATGTTTCAATACATGTAGACTAT  
TTAGACTGTGTCCTTTTCAGGGGGTAGGAATGCACACATACCACATGTAGG  
AGGCTGGGCCATTTGAAAAAAAAAAGTTGAGTCTAACAGAGAATATTCA  
ATTATTACTGTATGAATGGAAGAGCAGGGGAAATTTATCCAGTGGAATTG  
GTTTTCCAACAACCTTTATGTAAGTCTCAAAGTTTTGTCTGCTTCTTTTTGG  
TTATTGGGACAGTATTTGGGGGTGGGGAGTAGGTTTCTTGTGCCAACTG  
CTGCATGTTCTGTTGAGAACATCTTGAAAACCTTCATTGCATGGATCTGTT  
ATGTCAGAGTGTTTGTTTTTTCAAACAATTTGACATTTTGAGCCGTCAGC  
AGCCTGGAAAGTTTCGCCTTCCAGATGCAATTCTCTGAGCGCCAATTTCC  
ATGTGGCCCAATTTCTACCTCTTCTCGAACTTTGGGCCAAATCAGAATAC  
CTTGCTGACCACAGCGGCTGTCTTTGCAATGCAATTGCCTATCAGGCTTT  
CTCCTGGAGAATGCCAAATGTCGTTTTCTGCAAACCTAACCTAGCCAGGC  
TAGTGATGTCTGAAAACCTCAGCCCAGGGTAAACATCACTTATTTTCTTA  
CTGATGCCAGGTTTCTTCCTTCCTTCGTTCCCTTCCTTCTTCCTTCCTTC  
CTTCCTTCCTTCCTTCCTTCCTTCCTTCCTTCCTTCCTTCCTTCCTTCCT  
TCCTCCCTTCCTTCCTTCCTTCCTTCCTTCCTTCCTTCCTTCCTTCCTTCCT  
TTCTTCCTTCCTTCCTTCCTTCCTTCCTTCCTTCCTTCCTTCCTTCCTTCCT  
CCTTCAAATAATTAACATACAATATTGTGTCAAGTTTCAGGTGTATAGCGT  
AGTGATTTGATATTTATGTACTTATAAAATGTTCACTGCAATAAGTCTAG  
TTACCATCTGTCACCATGCAAAGTTGTTACTATATTATTGACTATATTCT  
CCATGTTCTAAATTACATCCCTGTATATTATTTATTTTGCACTGGAATA  
TTATACCTCTTAATACCTTCCCCTACTTCATCCATCCTCCACTTCTTTTT  
CTTCTGGCAACCATCAGTTTGTATTTGTCTGTTACTATTGTGTTTGGTTA  
GTTCAATTGACTTTGTTGTTTCAAGTCCCTGTACTGAGTTTCTTAAAGGATCT  
TACTTCTTAGACTGAAGCATCACCTTTAGTTCCCTGTTTACTTTTTTTTT  
TTTTTTTGAGCATGGAAAACAGGAACTTAGTGTAAGAAACATCTCCCATC  
TTCCATTCTGTAAGGTACTATGTTTCAGTGTGAGTACTTTGGGTGTTG  
TTTTGTGTTTCAAAGACGTTCTATTTCTTATTTGCATACTGACTGGAGCA  
ATTTTATTTAGAACAAGGGAAAAGATAATGTTTTCTCAGATGAAGATAAG  
GCTAGAATGGAATCTGCAGAAAATGCGGAGAGGAAAAAGTAAATGCTTA  
GAGCTGGGGTTGGGAGCAGCTATTAAGTGTAGTCTTGATCTTACTGGGA  
TGAGAAAGTGTCTAAAACAGGATTGTGGTGATGGTTGCACAGCACAGTA  
AATTGTCAAAAATCATTTAATCTATACTTTAAATGGATAGATGTTAAG  
ATATGTATAATATACCTCGATACAATTGTTGGCTAAAGGAAAGGGTGGTA  
TCTGCATAATGTTATTTTAATGATTCTCTAGGTCAAGTATTTCTGGGACT  
TTAATTCACTGCTCAGTAATACTAACCAAAGTTGTTACTATTAAGTTCCAT  
GAAAGTCAACTCATTTCCATGTTTCCTTATGGAAAATATTATTTAGCAAC  
TATTCATGCACACAGCACAAACACACCCCTTTCCCCACTGCCTCCCCACC  
ACACACACACACACACACACACACAGTGTACACACACTAATCTC  
TATATGATTTCCTTTAGGTGGCCATGGAGTCAAAGAATACCCCTTAAACA  
TTTCCCCCTAGCCCTTCAAGTTTTTCTCAGCTGTCAATTTTACTGTGCT  
TTCTATCATGCAGGATAACTCTGCAGGTCCATCATTGACACCACAAGCT  
TAACATTTCCTTCCTTTTGAACAAATTTGTATGTCTGAGCATTATGTGTTA  
ATTTGCTAGGCTCTCTCTCCATGTTACCATTATATCTCCAAAAGATTCC  
CATTCCTTCAAATTCACCAGTACAAACCTGCATTTCTCTCCAGTTCCCC  
ACTCCAACCTTTTATTAATATATTTTCTCTCCAGTCTTGAAACCTCAGAGT  
CATCTTTGACCTCTTCCTTGCTCTCAGGGTATAGAAAAGTTCCACAAACCT  
TTCAGTTTGCTTTACATCCATGCTTCTCTTTTCATTCCCTTTTTAGCAGT

CTTTAAACATCTAATATAAGGATTATAGTGAGAAACAAACCAACACTGA  
GCTAATCTCTTTGCTTTATCACTTTGTTTTATGATATCCTGATGCCTTTG  
CCAGAATAATGCCCCAAATGCCAGATTTGTCATTTTTCTCTTCCTGGA  
AACCTTAATTATCTAGTATTGCTCTCAAACCTACATCCACAAACATTTTTT  
AAATCTAACAATTTAAAGTCTGAAAGCCCTTGATGGGTGTGTGTGTGTGT  
GTGTGTGTGTGTGTATACATGTGTGTTAGAGGTAGAACAAATATACATTA  
TCTCATCCTTTTTTTCAGAAGTTGATGGTATATCATTGTGAGATAAAGGAGC  
TGAAAAGTCGTATAGCAAGGAAACATTTTTTAATTCAGTCTCATACAGAGT  
TTGTTAAAGTGCTTTGAACATGAACATTTTTTTTTAAAGATTTTGTATT  
TTTTTCATGACAGACAGACACACACACACACACAGAGGCAGAGACAT  
AGGCAGAGGGAGAAGCAGGCTCCCCGCTGAGCATGGAGCCTGATGTGGGA  
CTCGGGGATTATGAACTAAGCCAAAGGCAGATGCTCAACCACTGAGCCAC  
CCAGGTGCCCAGAACATGAACTATTTTTGATACCAATCTATAGTATCCATC  
TGTGCAGGGCTATTGAGCAAAAATAATAGACTGAGGAATACTATCTAAATA  
TGAGACTCAGTAAAAGACAAAAGTGATCGATGTGACTTCTCTGTGTCTCA  
GCGAAGAATTTGGGTACACTTCATTCCAACCTGTCCCAGCCTGCAGTAAC  
TGTGCAGGAGTGTGGCAATACAAATGTGGGCAAGCCGATTCTTCAACAGG  
ATCCACTCTCTTTTTCTGGACTGGCCACAGATTCTTAAATGTTCTCTATG  
CCCAGGATCTATTATGAAGTTAGCATCACTTGTGCACACAGGGGCAGCCC  
AGGGCAGGCATTGGCCAGATCTCCAGTGGAATAAAATGGTGCCTAACACC  
AAAAGCAAGTCGTCACTTCTCTTAATCTTTCTAGGAAAACAGTGTCA  
CAAAAACATTTGAATCTATAATTGGCATCTTTAAAGATGCTTGCCATCTG  
GACCTCACTCAGTTTAATTAGTCATTGCAGGGTGGTGGTCTCTTGTA  
AATCTTGCCTCCATTAACCTTGACTTTTTCACACATTGACATTTCAAGCC  
CCTTCTTTGCTTTTCTATGGTGGAGTGGACACGTTTCCATTTAATGGGAG  
TCCACCTCAGGGTTCATGAGCCAGACGCTTGTTATTTGGCAAGGCCACTG  
AGCCCAAGTCTATAAATTGTGGCAGCCAGGAAAGGTTGCAGGCAGCTAAA  
AATGGCAAGAGAGCAGGAGTCATGGGGCTCACTCCACCTTCTCTAGAG  
ATTTCCAAACAGCATGGTGTAGCAAGGATTGGGAAGGGTGGCAGAGGAAA  
TAACACGTAGAGATGAACCTGAGCAGAACTTGAGAATGGGTTTATGCACT  
AAGGCAGCTTTAGTCTGCTGTGAACAGCTACACAGACTGATTAGTTAGCA  
GTTTCTGTTGCTAAACAGTTTAGACAGCTCACCATTTATTCCTTTAACAT  
TTTAAGTGAATATTGTCAAACCTGGGCATCAGAAAACAAGGCTTCTTGT  
ATTTCAGGGCAGTCCATGACATTCAATACTGTCCTTTCTCCCCATTTTTT  
CCCCCTCTCTTCCCACTTTTCACTTCCCTTTTCACTGTTTATTTTCTGAG  
GGAGTTTTCAAGAATGGGAGTGGCCATGCCTGGTCAACAGGCAATCTGTT  
TTACGTATTTCTTTTTTCACTTGAAGCTGCACAGCAGAAATGGCCATAAGA  
TGTGGTAAGAAATGATGTCAAAGTAGTTACAGGAGGCTAGAAAGTCTGTCC  
TCTCGTAGCCCAAGAAGTATCCATCTTCTCTAGCTTGTGAGCATTCTCTC  
AGGTCTTATTTTATATTTATTTATTTATATATGCCCCATATTTTATATTT  
TAATGTTATCCTATATTTTATTTTACAAATGATCATATGTCTATTTTTC  
TTTAGCTTTTATTTCACTTATTTATTTGAGAGAGAGAGGGCAAGTGTGATG  
AGGGGCAGAGAGAGATAGAATCCCAAACAGACTCTGCACTGAACATGAAA  
CCTGATGCAGGGCTCAATCTCACAACCTGAGCTGAAATCAAGAGTCAGA  
CATTTAACCTACTGAGCCACCCAGGCATGCTTCAGTGTGCCTAATTATTA  
AAGTAAGTTATATTTTATATAGGACATTTAATCATCTCTCTTTGTTATT  
TCATAATTATTGTATCCATTTAACAAGCAAGCAATTTGTATGTGCCAAA  
CTTCTGGTAATGCTGAAGATCAGGAAATTTAAGTTATAAATATTTCTTCA  
CTAGATACTGTATACAGAACCCAGTTAACAGAGAGAATTGAGAGTTAGCA  
ATAATAGCTTAGAAATTAAGTCCACTAAAATATGGACATTATATCTTTTA  
GCAGCATTTCTAGTGTGTGTGCTGAAATCAGTATCTTTGGAAGTGTAGTTG  
TTATGCTGGTCAATGGAAGGAGCTCTAGCATCAGTGTATTGATTAATCAAT  
TGGTTAATTAGCTCTAGCTGTGGTAGTCAGTTGCCATAGCCTAAAATTTA  
AAAAGACATTTGCCAATTGCTTCTCAAGTAGTCTCCCTGCATTCTTGAA  
ATCTAGAGGCTCATTATGGCATTTGGACCAATACAATAGGATCTATAGGTA  
TATGCTGATAAAATTGAGATTTTATGGAGGATGTTAGTCTATTTGTGTT  
GTATGTGTGTGATTTTTGAAATCAGATTTTCTTTTTCTTTTTCTTTTTT  
CTTTTTTTTTGTTTTTTGTTTTTTGGAATGACTTGCCAGGTAAACATACC

TTGTGGCCACGATGGCCAAGCCTGAGTACATGTTGAGGTACTGTTACTT  
CAGGGAGGATCATCAAGCAGCCAAGAGGAAGCATGTGAGCATTGACTGGC  
TTAGAGTATGGGCTCAGTTAAGTTGCAGTCAAACCCCGAGATGGTATTAG  
GAGGTATCAACACCACAACCTCCTTTGTAATTTTTTAGAGTCTGTGTATTT  
TGATGAGGGTGGGATTGAGGGCCTCTTGACTTTCTACTGGTCATCTATTA  
TCATAGTAATAGTATAAAACAAACCACCTTTAAATAAACAGCTCACAAC  
AATAAGCATCTGAAAAATCTTGAGTCCAGGAGTTAGTTACTCTTTTAGGC  
TGGGCTCAGCTGGATGGTTTTTCAGTCTCCAACGGGATCAGTCGATGGCCT  
GGCTGTTTGATAGCTATTAGCTAGGAATCATAGCACAGGGGCCTGTGTTC  
CTCATTTCTCTAGCAGACTAGCACAGACGTGTTGTCATGGCAGAGGTAGAG  
GGCCAAGAGAGAGAACATAGACATGCATATGATCTTTGTGTCTGGGCTTA  
GAACTGGTGCATCCTCACTCTATGGCATTCTGTTGACTAAAGTACATCAC  
AGATTCATCACAAAGGATGAGGAAATAGACCCATCAATTTATAAAATGGA  
ACTTCAAAGTCATGTGGCAAAGAGTGCAGGAACAGCAAGGCATGAAGAAC  
CTGGACTATTAGTACAGTTAATCTACATACATTTATTCCTTAGTGGAAC  
ATTTTGATCAGAAAATTTTCTCAAGCTTTGTTAGATGTCATGCTGCATAT  
TACAGGACAAAAATAGAGAATTCAAAAATGAAACATAAGAGATATATCTC  
TGTAGAGCTGACTTATAATTCTGCCCACACGAAGCAAGAACAATGCCTTT  
TCTCCAGTTGATAAAACGAATGTACCATTTATACTAAAAATGTCGATCTAT  
TTTGAGATTTCAAAGCATTACATGGTATTATTTCTAAGGAGCATTGGAG  
ATTTATGATGTACTGTACCAAGTTCCCAAAGGGCTCCCTCTAGCCTTGCT  
GTCTTTTCTCTGTTTCTGATTTCCCCTAATGTTTATGTTGTTTTCTTAA  
AACCAAGTCCTGGTAGTACAGGTGGAGAAATGATAAACTAGTCAGTGGGA  
AACTAGGCTAGTTTCTTCCAGACCATCATCCAGTGAATTTTTTCTGCTG  
ATACAGCTACAATTTAGAACTTGAAATGATGCATAGGTTGACTATATTC  
TGAGTGCCTCGTACTAAACCTACTACTCCAAGTGTAGAAATAGATTTGAA  
ATATGGATTCTATTGATTATTAAGAAATTAACCACCAGCACAGAACTTAT  
CTCACTTTTCATGTTTTGGGGTAGGGGTGAAATTTTCTCAGAGTAACTT  
ACAGATACGTTTTTATCTTATTGAACTGTATTGAAAAACAAGGAGAATAA  
ATAAATTACTTGCACAAATAGGTAACCAATTGTACCTTTCTGCCCAGACC  
TGAGGGGTTTTCTGAAGCACAGGCTCACATGTGGAATGTCTCAAGCAAAC  
TGGGACAAGTTGGTCACCCATATCCACAAACATGCCTTTCAGGATAGTTGA  
TAATCTGGCAATATTTCTATGGGTCAAACAAATTTAGTTAACTGAGTT  
TTAAAGTATTCTACATATGTCTTACAGGCATAGTTTTATTTTCAATTTGT  
ATGGAAAATTTTAAATCATTCTATTTTACTTTTGCTGTTCAAAGCCGAAGC  
TGAAAATAAGTGAGGGAGAGCTTATTTCACTTATGTGAATATTGGCTAAA  
GGAATAAAAGTAAATACTTTTGTAGAGTATAAATAGCAGAAATCAGATGT  
CATTATCTTTAATGATTAGTTTTTAAACCCTAATTTATCTATTTCTTTT  
TTTTACTCTGCCAAATCAAGGAGTAATTTGATGATTTCTAAGATCCTTCC  
AGCTAAAATGTTCTAGAACTCCATGTTTATAATAAAATGAATTTCTTCATT  
AGGAGAGAAAATATTTCAGAATGCAGACTGACTTTTAAAGAGTTAAATAG  
AACTGCAAAAAGCTGCCATTTTAACAGAACATTTTAAACCAACGAAGTGT  
ACTAACTACTGTTATTGTTTATTTTCTTTCTAGTCTAGGGAAAATTTTTT  
TCTTTTAACTCTGCCAGAAGGGACTTTTAGGATTTGAGCCTTAACATTGT  
TCTTAAGGCTTGAATTTATTTTAAATTAGAGTTAAAAATAAAATAAATG  
TTCACTTTCTAGAGCTATGCAAGTCCAGGAAAAAAAAAAAAAAAAAGAACT  
TCCTCATCTGAAAAGATTTAATGGTAATCTATGCTGTAAAAGAGCATTTT  
GAAAAATATAAAACAAAGAGCTTTCAAAGTGGTCAAAGACTAATGTAAAG  
TGATATATTTAGACCCGAGAGATGGTGTAACTTACTCCTGTCACTGCTG  
CCTGTTTATGTGTTTGTGTTGGTGGCCTGGCAACCAGCTCATGCCATTT  
CACTCATTTTATAACGTTCCGTAAATGTTAGGTAGGCCTGGATTTATTA  
TACACTGTCAACACCTAAAAATGGAACCCACTGCTTAACGTAGTTTATTTG  
GCTGGATGCCTCTGCCTCCTTAAAAAAAAAAAAAAAAATGTGTGTGTGTGTG  
TGTGTGTGGTGTGTGGTGTGTGTGTGTGTGTGTGTGTGTGTGTGTGTGTG  
GTGTGTTAGAGAAAAAAAAATCCTGTAGTGCCTCCAAAAGAAATGTAGCC  
CAGGCATAATTGAAGTTGGGTGGCATGGGCTATGTCAAAGGAGCATTTGA  
GCTAAGGAGCTGTTGTGTTGTTGGGTGGGGACATCTGACTCACAATATTT  
GTGACTTGGGTTTAGAGGGACAGAAGACCAAGAGTCATGTTTATTGCTGA

ATTTATCATCCCCAATGAAACCAGATGGCCAATCGCTGTTGTCCAGAAAG  
GCCTGTGAGCCGTCAAAGGATGAATCATAAGCCTATTAGAAGTTGGACCG  
ATTTCTTTCCCTTCTTAGTAACACGCTCGTTTCATCCGTCTGCTCTATGAC  
AAAGCAGATTTGATGAGGACCCAAGAGGTACAATCCTGGAGAGGTTACAT  
GTTGCGATAACCTTAATCGAGCTTATATGTACTGTTGAGATAGCTGGAGC  
ATTAAGGTGAAACATTCAAAGAGCCAAAGTGGTTTAGAAATATTAAAGGG  
AAATGTGATACTCTGGCCACAACCAATGGAGGCAGACTCAGCCCAACACT  
AATGAAAATCACAGACAGGTACCTCTGCTGCCTTGCTCTGGATCAGCCAC  
ACATTGAATCAGTGTCTTATTCATTTCAGTTCCCTTCAGGAAGGGGGGGTG  
ACTATATGTGGGAGTAGACTTTTGTTAATAGCTCTGTTCAAATCAGTGA  
ACAAATCTTTAAATCCTATATTCTTTTGGCTCCTAGGGATCAATGAGTTC  
ATCCTGCTTATTCTCTGCCCTTGTCATTTCACAGGATGATTGGGTG  
CTGAACGCAAAAGGTTAATAGAACTGTGACACAATCTTGTTAGGCTGGG  
GTTGAAATCATGATCTCCAGTCTCCCTCCTAGGTGCACATCTAGTCATT  
ATTTAAAACCTTGTTAAATATAGAAAAGATTCTTTTGAGAAAAATTACCAT  
AAGCACCCTGGCAAGTTGAGAACCAAAGCTATTCCAGGTAACGTGACTT  
TTTGTTAGTTGGATAATTATTGTAATTATAGCTCAATGTAGTTTGGGCTT  
GTAAATTTCTAGAGGAACATTGTATTTTCTTTTTTCTTTAAGAAAAAGTT  
TTTTTTTCCAAGTTTTTATTTGAATTCAAGTTAGTTAATATATAGTGTAG  
TATTGGTTTCAGGAGTAGAATTTAGGATTCATCACTTACATATCACACCC  
AGTGCTCATCACAAAGTGCCCTTAATGTCCATCACCCATTTAGCCCCTCCC  
CTCCAGCGACCCGGAGTTTGTCCTCCATAGTTAAGAGTCTCTTAAGAGTC  
TCTATAGTGAAGTTCTTAAAAGATCCTCTGTAGTTAAAATGTCTCTAGA  
GGGACATTTTATTTATTTTATTTTATTTTATTTTGTTTTTTAAGCAT  
TTTATTTATTTATTCATGTGAGACACAAAGACACAGGCAGAGGGAGAAGC  
AGGCTCCCTGCAGGGAGCCGGATGCAGGACTCGATTCCATGACCCTGGGA  
TCATGATCTGAGCCAAAGGCAGGATCTCAACCACAAATGTCCACCCTAGA  
GGGACATTTTAAAAAATTAAATTTTAATTAAATTTAAATCTATTGAATTA  
AATCTATTGAATAGTTGTATTTACTCTCATCCCTGCATCCAACCTAACT  
ATTTTATGAGTTAACTTGAGAAGGGAATTTTTTCTTAGAAGAGGACATTT  
TCCTCTACTCTAATCTCCAGCCTCCCAACCTGATGAACAGGTGGCAAAAA  
CGTTCTGAGGGAAGAATGGGAAAATTTGTTTTTAAAGCTCTAAATAGTAT  
GTGTGCCCTTTGATGTGAAACAAATAGACTTCAGGGAATTCTCTTAAAAG  
ATATCTATATATATAATATATATATAGATATATATATCTTATATATATATCT  
TATATATATATATCATATATATATGTATTGGGTGTGTGTGTTTATCGTAC  
ATGTGTGTGTGATATATACACATTCATATGTACCTGTTATTACGTAGTCC  
CCATAATGCACATATTACATTACATGCAATATTACATAGTCCACATTATG  
TGTATGTTCTAAAGTGTTAGGAAAACTTTCATTTAGGTGATACAAACAC  
ATGAGCTTTGGACATGTGTGTATGTGTGTGCATACACTTGTATATGGGTG  
CTTCTTTATTTGTACTGAGTAGATAGTCTAAACTCAAGTAAGATAAAACA  
CTTTAACTTTTTATTTCTCTAGACCAAATAAGATCATTCAGGCATCCAC  
CCAGTGTCCCCTGCATTGTGTAGCCACGGTGGCGGAAGATCTGATGGCAG  
AGTCCATTAAATGCCAAAAAGTCAGGGTTGACCAATGTTAGCGTCATGGC  
AATCGTTGGTTTGTGGATGCCTCAGACCAATATAACTGATATTTAATGCC  
ATGCAATCCATCTCACATTCCAAATATGGACATCCTAAGTACTTTTGTGA  
TAAAGGAGCCATTTCTAGTAATGGAAGTCTTAGGGCCAATCTACAGGAGT  
CCATGGCATTTTGGAAGTGAGGCGGGAACAAACAAAAAAACAAAC  
CTTCTTGACTTAATCAAATAGTACTTTTCATGACAAAATTTTACAGAAAA  
AGCTAATTTGAGAGTTTGGTCATTGTATGTGTGAGTGAATATGTGTGTGT  
ATGTATTTGTGGGTTATATTTTGGTTTTTTTTTGTGTTGTTGGGGGATTT  
TTTTTTTTTGTCTATGAAATAACTCATTGTTTGAATTTATCCTTGCTGGC  
CCCAGAAGGAAGGTGAAATCTCAGCAGTGATGATGTTTGATTCCATCAG  
TGAGCTTAAAGCACAAAGGAATGATATTCTAGTACAAGCTGTCTAAGAAA  
GGCACTGTTTTATGGGTGAGTCCATTCTTCATGGATCTGACTTTTTTAAC  
TTATCAATGAACTACACATATATGTCTACTTCTGGGTTTTCTGTTAGTCC  
AGCTTTTCTATTCTTTGGGTTATATCACATATTTTAATTTTGTAGTTTT  
ATTGTCCTTTACCCCTCCCTAATTTGCGCATTTTTCTTCTCTGTACCGA  
AATTATTATTATTTAGATGAACTAAAAAACCACTCACCAGTTAATACCA

AATCAGATTTTAACTGTAAC TACCAAACACTTATAAGCTAATTTTAGAGA  
ATATATTATTGAGTAGTCTCAATTAAAGGTACCTTATTTGAATCCTTGCT  
TTAATTTCCCATAACTTCTTCTAGTTCTTAGTGTATGGATATCATATTTT  
CAAGCTGGCTATTTCTAGCATGTATAGGGAAATTATTGATATCTGTATGT  
ATTTGCGGGGGGGGGAGAGAAAAGCTTCCTATGAGATTTGATTATGATTT  
CTAATAATTACTCCATTCTCATAAGCTTTTCATGAGGTAGAATAATTCATC  
TACAAAGAGCGACATGTAGTCTTCCTTTTTTTGGTTGTCAGTTTTACAGCA  
TTAACTAGAACTTCTAGAATAATTGGTGTAAATGATGGCTGTCCTGGCTCT  
TTTCTGACTATAATGGGAATTCTTCCATTTATGTTTAAGTATTTTGTCTAC  
CCACTGATTTTTATCGTTCCATTTTTATTATTACATGTCAGTTTTTAAAT  
TACTCATTATCTTAGACATCTATGGAGAGATTTCTCTTTTGATGTATTCA  
TGAGATGTGCTACAAAAATAGAATTTCTAGTATTAATCTATTTTAAATTT  
GGGATACAGCCTGATTGGCCATGGTCATTGGTCAATGACATTAATAATCTG  
AGTCTTGGGCTATTGTTTTTCATTAATACAACCCAATGCCCTACATTATTA  
GCTCATAGTAGGTATGCATTCAGCATTTGGTCAATGAATGAATATAAGTA  
AATTTCCAAGAACTGTCAACTCTTGAGTGGATAAAAATAGCAGCTCTTATA  
AAAAGATGTATCATCCTAATAAATAATTGCCACATAAGTTATATTTTCAGT  
CACATCAATTTCTTTAGAAAAATCAAATGCTTTATTTTGCTCTCGTCAT  
TTTGGCCTCTTGCTTGTCTCTTAAGTGTGGGCCACTCTTACCTATG  
GTCTCTATACCACTCTTCCCTCTGCCTGGAGCACTTTCTGGACATCCACA  
CCTTTAACTTACCTCCTTCTTAGCTGTACGCACATTATCGTTTCCAGGAA  
GTCAACCCCAAACAAGCCTATATTACTTTGAAAATGTTTTCCATGCGATT  
TGCTTTTATTCATCATTCTGGCCATACTCTTCAGAGCATATATCAGTTG  
TGTATCCTTTGAAAAACAATGGACAACAGATTTCACTGAATTATCTCAA  
GTGCAAAGATGCAAACTGAGCAAACAATTTACAACCTCCCTCCCCTTTAG  
AGATAGGGGTGGATTTTTTTTAAATAAGTCCTTATAACTGCAGGATTACAA  
ATCTTTATCTGAACCATCTCAGCTGGAAAACCTGATTTCTGTCCGCTCTG  
AAGGCTCATTTGAAGATGCCACTTTAAGAAAGAAATCTTGTACCTCCTAT  
CTGCTGGTGCAATTCCATTTTGGTCTTGGTAGCTTCTTCTGTAAACATG  
ATATAGAAATGTCTGCAATTCTGCATTAATGACCACCTACATAATGAGAT  
CAAATCTTAACTCTTGGTGACAAACAGAGTAAATATATGGGTAGTTTGTT  
TAGGCTCTAGTTTGAAATGACTAAGTAGCCTGTGAAAACAAAGTTTAAACA  
GGCTCATAAAAGTATGCTGTCTACATAACTAATGTGGAGTTTGTTTTTAT  
GTTGCCTATTACAGACCATAAACAGTAACAGTGGAGTCTATCTTTTATTC  
CATAGAGCTGTAAAATGTCTGGCTGTGACAACGGTGTATATACTACACA  
CACTTTGTAAAGATGTTGCATTTATTTTATATGCAATGAAAACAGTAAA  
TTGTTAAGAATACAAAATGCAAATAAGCACATAACACTTGAAATGTACTT  
AAAATTACATAAAATATAGAGCAGTTGTATTTTAAATATGTACATTGTCT  
TAGAGGGGAAAACCTTCTGCAGCAAACCTTCGCATGTTTAAAAATGTGCC  
TTAATCAGCTTCTTACGGAATTTCTGACAGCAGTGGCAGGACCATGACTG  
CCCCTTTTAATTATCTCACAATTTGCTCACTGGTTTTGGGTAATTGCAAC  
AATTTGCTTGCAGAAAATTGTGAGGAATCAGATGTTAATTGACTTTGTCT  
TGCTTAATCAGGCCCTCAAGAAACAGGCTTCATTTTCTGACTGTTTCTT  
AAGCTGTGTGTTGGCATCCTGTGATACAGTGGAAAGAAAACATACAGACA  
GTTGCCTTGGTATTGACTGGCCAAATCTGATTATGAGTCCAACTCTGAAT  
GGAGCATTTCCAGGAATTAGCAGAGGGACCTAGAGAAAATACTCAGATAT  
GTGAAATGACACTAAAAAGCATTTCTGTGATATACATGTGACATAGTAAA  
AAGGTAATGCACATTTAAAAATCAGAGTTCAATACTCATTTTGATTCCACT  
GCTAAGATCTGGAACAATCTAAATATAATATATGGCTCAAATTATTATTA  
GAATGACCCATTTGGGGGCCCTGGGTGGCTCAGTGGTTGAGCGTCTACC  
TTTGGCTTAGGTCATGATCCTGGGATCCTGGGGTCAAGTCCCACATCGGG  
TAACCCGCGGGGAGCCTGCTTCTCCCTCTGCCTATGTCTCTGCCTCTCTT  
TAAGTGTCTCTCTCATTAATAATAATAATAAATCTTAAAAGAAAAAAGA  
AGAAGAATGACCTATTTATTTGACTCTTTGTGATCATTTCTGAGTATCACA  
ATCTGGTGGCTTTGATTTACCTTCTCACCTGACAATAACTTCCAATTTT  
TGCTTTTCTCTTCTGCCCTCCCCCTTGGCAAAGAGCCTCATACTAAAGATA  
GCTGAAGAGTGTCTGCATTATCCAGAATCTAGTAGAATCATCCCCAGAA  
AAACCAAACACACAACCCTACAGTTAATACCCTAATCTTCTATACCCTTG

ATTCTAAACCCAAGAGGCTTCATAAGCAATAGGGAGGGAGGGGTGAAGGA  
TTTGGTAAATATAACATATTTTAACATAGTTAAAAGAATACTATTTTTT  
GTCCATATCCACAGATTGTTTTCCATATGTCAGCAACTTTCCTTTATATTA  
TTTACCTCACTTAATTTTTTATGTCTTTCCAGGTGAGGCAGTTACTATTT  
AATCCTTCCCATGTACATCCTAGTTTGGCTACTTGATTTTCTCAGCTCAGATC  
ATGATCTGATGCTTAACCGATTGAGCCATCTAGGCACCTCTTCTTGCAGT  
TCTTTTTTAATTTTTTAAATTTTTTAAAATATTTTATTTATGAGAGAGACA  
GAGAGAGAGATAGAGGCAGAGACACAGGCAGAGGGAGAAGCAGGCTCCAT  
GCAGGGAGCCCGACCTGGGACTCCATCCTGGGTCTCCAGGATCACACCCT  
GGGCCGAAGGCGGTACTGAACCGCTGAGCCACCCAGGCTGCCTTCTTCTT  
GCAGTTCTATGCATTTTTTGATTTATATATTGTAGATAGAGTTAAATTAGT  
AGATGAAGACAAGTTTAAATTTTTTATCTTATTGGTGAATTGAACTGTTTA  
TTATTTACTATATAATAATTATCTTTTCCTGATAATGCTTTTGTCTTAAC  
GCATTCTTTGTATGATACTAATATTCAGACATCAGCTACCTTTTGTGAT  
AGTACCCTGGGTATATCTTTTACATTCCCTTGATTTAAAAAAAATGTG  
TGTCTTTATGCTATAGAAGTCTTTATGAGCTGTTTAGGGATCAAGGCTGG  
TATATTCTGAATTCATATTTATAAGCTAGGATTTTAAAAATACAATTTCA  
TTATCTCTGTCTTTTAAATAGCAAGTTAAGATCAAGTTTATAATTTCTAC  
TTATCCCTGTCTTCTTTCTTCTTCCCTTTCTTGCAATCTTCAGGATTGGT  
TGTGGTTTTTTTTGAGTTGCTCATTTTTCCACATTAAAAAAAATTCACCAG  
GTTTTGAATTCATCCATTTCTACCCTTTTAGAGGTTAGTCTGGAAATTAT  
ATCATGAATATTGAATGAAGCCCAAAGTTTAAACATGTTAAAATTTCAAAC  
TAGATTTAGAATTAATCTTAATATTACTACTGTTTTAGTGATCCCTCCTG  
AACTTTTATCATGCATATTTGGTTACTCAAGTACAAAGCTTAACAATATC  
TTAAACCCTATTTTTAGCCCCCTTTCCTCCCCCTAAAAATATAAGGACCTC  
ATAAAGACCTGATATCCTCTAATTTATATGCTCTTAATTTCTGTACTTT  
ATTACTGTTCTTTAAAAATCACTTTTTATTTTAAAGTAGCAGCATTAATAT  
TGCTTTAAACCAGATAGCATTTGTCTAGATTTAATAAATGTTCAAACTT  
TTTCTTACTATTTGTTTTTATGTCTTGCAATTTTCTCCATATTTTCTTCT  
CCTCGAAATATATTTTTTAAATTCAGCCTATTAGTGGAATATTTGATTTTT  
TTTTACCTGAACATATTATGATTTTTATTCTTGTTTTTAAAGCTGGATTA  
GTTTAGTACACTATTTTTATTCATAGTTATTTTCTCAAGCACTATGAAG  
AATCCCTTGATTTCTCATTTCTATTGTTACTTTTAAAGAAATCTGTTATCA  
ATGTAATTCCTTACTCCTTTGTTAGCGAGATGTCTTTTCCCTCTGCCTTTT  
GTGCCACAAATTTATAAATTAATAATTTGATTAATTTGGGGTTGCTTATCT  
ATAATTAAGGGAATAGTCTACTTTCCTTCTTCGTGTAGTAAGAAATATGC  
CACCATGTGTGAACACACATGCACACAAAAGCCTCAAGACTTAAATCGTG  
TGAAAAAGCCCTATTACATGCCTTATTTAATTTTATATAACTAGATATTT  
AATATATAGTTAGTATAATATATATGTATTATGCATATGCACACATACAT  
ATATATCTTAAATATTTTAAATGTGTCACTTATTTAAACAGGTAAATA  
GTGGAATCATAAATAGCTCTTAAATATCTGGTGCTGTGTGGATGTACTT  
ATTTGGGAGTTTCTGTAGCTCGATATTATGCCCAGAAGAATTTTTAAAAA  
ATCATCACCTCATGTAATGCTGTATGAACAGGCCATTAAACACTCTGA  
GCCACAGCCAAGTTTGCCTACAGGATTGAGATATTCTGAATAAGTGTT  
TGTGAGTTGAGTTCTTAACTAAATCAAACCTTACCACGTTGTATGGTTGT  
GCATGACATTCTCTGCTGTTTACACAGCATAGTAACCAGTTGTGGGATCG  
ACAAGTCAAGGGGAGCGTGGAGGCTTTGGAGGGAGTTCAGAGGAGAAGGA  
TGATGATTAAAGACTAGAAAAATCAGACCTCTGAAAAAAAATATAAGGAAC  
TGGGTTTCTGTAGTCTGAAGAATAAGTATTGAAGAGTTACTGTGAATAGT  
TTTCAACTTGAATGAGAAGCTTATAACAGGTAATAGTGATTCTCTGGCCTC  
TGTCTTATGAAGCATGGCCAGTTGTTACAGATTTTGAATCCAATATGAGG  
ATATAGGCTATCTAGAATTCATTATTTAATGATGATAATTGTTTAAATGTT  
CTAATTAACTAGAGCAGGCTAAGAGGCCATCTTTCTGTAGCTTTACATG  
AGCACCACCCAGATTTCCAAGTAGAATGAAGTACTAGGTTTCCATAGTATTT  
TTCATATCACTTTTTATAGAAATATCTCCAAGTCTCTAAAAACCCTACTGA  
GCAACTTAGTGTGGGGCCACCTTCCATCATCTACTTCCTAGCATCAGTGC  
CTGGTGAAGTAGAAGGAAGCTTAAACAGATTTCTGGTAAACTGAATTGAATGG  
ATTGAAAATTACTCTATATCTATTATAATTACTGTGTCCCATATATTATG

GGAGACCTAGCTAACCTTTGGAAGCTGGAGCATTACAAAATATTTTTAAGA  
GAGGTGGCATCGAATTAGATCTTGAAGGAAACAAATGATTTTTTAAAAAA  
AATTAACAAGTAAAAATTAATGAAGGAGGGATAAGTCTGATCAGAGAGTA  
TAGACTGAGATGTGGTGTGGTGTGTCCAGGGTTGGGGTGAGGAGTGCAA  
GAAAAGACTATACTGAATGGAGTACAATTATGAAGAAATATGTCAAGCTA  
AGGAGCTCGAATATTATGATACTCATCAATGTTTCCCAAAATATGTTATT  
TAAAAATATTGAATCTGAGAGATGCTAATGATTTTTTACGTGAAAAAAGTT  
TCTATATACAGCTAAATTTAAGAAGTGGGAATGTGAAATTAAGTGAATCA  
GGTTTTCCCATCGGTAGACTTCTTCAAGCCCCCAAGATGCTGGGAAGCAC  
CATGGATTTTCTAGAGAGGTGGCCATAGGCAGTCTTTTACGAATGTAAT  
TAATCCCATGCCCCTTTCGTCACTGAGCAGATCAGCAGCTTGTGCAACAG  
AGGAACACAGGGCAGAGCCACTGAAGACAAACTACAGGATCAAAGTAATA  
TTTAAAGAAGATTAATCTAGTGGTGACACACAGGGCTAGCTGGATGGAAA  
AAAAGGTCCAATTCCAAGAGTATTGCAATTGAACAGGCATGAAATAATAG  
GAGTTTGAATTAAAGTCTTGCAATGGGACAAGCAAGATAGGCTTGGATGG  
GAAAGAGACATAAAAGAATTGAATGCCTTTGGTAAAGTGAAGTGGGTAAAG  
GGTAGGAAGCCAAAAGAATGAAAGCTAACTCCAAAATTTCAAGCCTGGGT  
GGCTGGAAGAATGGTGGCACCATTGACAGAAAGAGGGAAGCCAGCCAGCA  
AATACATTTAGTGCTGTGTGTGAGGTGATAGCAGAGAATTAACACACA  
TTTCACAGACTCACATGGCCATAAAAGATCTCACAGGGCTTCGGGTTCAT  
GTTCTGTAGGCTAATAAGCCTATAGCTTACCTATCTCACGCCATCATGG  
ACCTTTTTCACAATATTCTGGGAAGAAAGGAATTAATAATCTTGCCCTGAG  
TAAGACGTTGCCATGTCTCCAACTAACATCATTGTTTTTAATTAGTCA  
AGGTCTTCCATTTGCTATTTACTGTAATCACTATCATATTCAGAATGGAG  
TATCAGTTGTTTTTACCTACAACTTTTAAATGAAACCAAAGGTACTTA  
GAATTTTTTAGTCTTTGCCCTTTTCTGGAGTCATGGAATTTCTCAAACC  
TTTTATAGGTTGGCATTATATAGTTACAGTGATTTAAACTTAGTCATATA  
TAGATCATATGTATTGGATAATATACTAAATATACACTAATAAATGGAAA  
TCTGTTGGAAAAGAACTGTAAATGAGTGCTCTTGGCTTGGGAAACT  
CATACTCTTTATAGTTTTATGAAAATATCATCCCATTTCTTTGTCATTGG  
TGATCTAGAGTCTAAGGCTTCTGGATTGCATTCTTCATAAGGTATAGTAA  
TCACACACTTTTAAATATACCTTATAATGCGATCTTCCGGCTCACAGGCAA  
TAAGAGTGTCTGCAAAATGATTATACAGTCGATTCATTTTAAAAAATAG  
TCTATGTATTATCGAGCATTAGCCACATAAAGTAATATTAAGAATAAGTA  
TACTAGTTGACTAAATGTTTTATGTATACATAAAGATTTATTTTTTTATG  
AGATGACCTTGAATAATATGTGTACCAGATTGACTAGAAAGTTTATAAAG  
CTAGGTTGATGTCAACCACTTCTCTGTATCACCAAAAAATACCACGTAAA  
GGAAACACAGAAGATAGAACATAATTTCTGATCACTCAGTCATATTTAA  
GACTTTCAAATAAATCATCATTATGAAATGCACATATAGTTGGGAGCAAT  
CTGAAGAAATTGCCATAGTCTTTTTATTAAAGAAGGAAGAAGCTACTTAA  
TAGTTTACATAATTATAGGAATAGGATATTTATGTCCATGTTGCATTAAT  
AAAAAAGCAAAACAGCTAAGGATTATTGTCTTGCCAAGCATTCTTTCCTA  
CCCTCCCAACTCCTCACTTCCATCCACATATTCAGGTCTCTGCACTTTGT  
CACAGCCACCCCCGACCTATAGATTGGGCACATCTTGCAATTTGATTCTT  
TCCTGATTCTCTCTCCCTTCTTCTACATAGAAGCAATGACACTCAGCTAC  
ATGTAGCTCCATTTTATCCAGAACTGGATTAAAGAGAGCCTGGTTGGATG  
CAGTTGGAGGATTGATGTCTCTCTGATAAGTCTGAGCCTTAGGAGCCCAA  
CCAAGCATTATGCTTCAACTCTCTACCTTTTCTCCATAACAAGTGGCCCA  
CCTGTTTGACTAGACTTTTAAACCTGGTATCTGAGTTTTACTAGGTTCCAC  
CTTCCATCTGAGGCCAACAAAGTCTGAACCCCCATCAATTCACCTCAGGT  
TCTAAACTCTTGCCCATCAACCTCTCTCTTCTCCCTCAAGGTAAATCTCT  
GTCCCTCTATCCTTTTCACTGAGCTCATATGGATTGTCTTGGTTTAAATTC  
TCATATAACTGGCTTTTAAAAAGTCCTTTCAAGCACTCCCTTTGGTGAAAA  
TTACCATACTGCTCAGATGGGCCACATTCCTTAATTCACCTAACCTGTG  
TTATTGAGGATCGCCATGAGCCCGGTTTCAAGAAATCAGTCAAGTTCAGAA  
TCAAGTTCATTGGGCCTGAGTGTGTAGAGCAGGGAACACATGAAGGCCAA  
ATTACATTGTAATTCTCAAAAGCTGGAGTTCTGTAAAAAGAAATGATGAAC  
ATTGGTGGCAAAGAAGATATAGGGGTAGGCGGGGGGGGGGGGAGTCCTC

AAACTCTGGCTCTCTTCTTCCTTGTTTCAGATTTAAACTTCGGTGCCAGG  
ATTTTGATTTTCCAATCTAACATACTTTTGCTTTCCCAATATCATGCAAA  
TGCATTCTGAAGAATGGCAGTGAGCAAAACCAGAGTAAGTATACTTCAAA  
AGGTCTGCAGAGGTGAACGATAGAGAAAAGTGAAGTGTGCGAGTGACA  
AGATTACCAAGAGTGTGTTTGGCATTGTGCCATTCTGGAGGCAGAGTGAG  
AAATGGACTCAGGCAGATCAGCCCTGCAAAGTCTAGGTGGGCCACCTTAG  
CTCTGGGTTTCAGATGACAGAACAGTTCCTTTGAAAGTTGACTAGAAGAAA  
ACCATGCCCTCTCTCCATTGTGGAAATATTTTTAGCCAAGTGTCTCTAC  
AGTATAAAAATCACTGTGCTCATGGACACACACACACACACACACACA  
CACACACAGTTGTTGAATCAAGGCATGATGTTGTACCTAAATCCCTTCTG  
ATTAAGCCAATCCAGTAACACAGAAAATGCTACTAAATTAGACTCAACTG  
AAGAGCAATACCCATTAAGAAGTCTGGCACCTTTTTCTCACCAACTTGCT  
CCATGTCACCACCCTCTCTCATCATTTTTCTGCCTATGCCTATAGCTTCC  
ATAAGAGGCCCTTCTTTCTTTACAGAAAAAAAAAATCCTTCCCAGGGGCAT  
GGGGAGGAATGTTTAGGAAAACGTCCATTGGTTGGTGGGAACCATCAAGA  
CTTCTGCAATCTCAAGGTCAGTGTGTGTAACTCGTTCCTGGGCCCAG  
AAACATATAAAAGCACAGAAAAGTCTGTTAGGGTCCAGTGAAGGTAGATG  
AGGGAAGGCCCACTCCCAAGGGTGAGCAGAGAGGGCAGCAAGAAGAGAAG  
AGGTAATATGAGTGTGATGAGAGGACAAGGTGATGTTTACAAGTGGAA  
TGTGTGGAAGAGAGACTCAGTTCCTCTAGTTCCTTCTCTCTCTCCTC  
CTCCTTTCCATTGCTTCACTAGGAGATCGATAGACAATGGTACAGATAGT  
GTAGTCCTGAGAGTTGATACTCAGAAAATATTATCTTTTCATAAAGTTAT  
CCAAGGAAAAAGTGAAGATCACCGCACAAAGATGAACCTGAAATCAATGG  
TTATTTTTTTCACTGAAGATTGAGATTAATTCATCTTGTTAAAATGAATT  
TATTTTTCCGTGGCAAGGATGGTCCTCAGTTTTAACTTTGATGGCTGGCT  
AAACTGTGGATGGTAATGTGTTACTGGAATAAGTATGGAGAACTAGCTC  
CTTTTTTTCTTTTTTTCAAACTCACTCCTGTTTCTCTATTAGTTCACATC  
ATTATTTATGAAATGGCATATCTTTAATGTATTTTATCATTTAATTAACCC  
TGCTCAGCATTGACTGCTAACAATTTACAGAAAAATGTCTGTCTCCTTC  
TACTCACTGCTTCTCAGGACAATCTGTAAGCTTACCCTTACCCCAACCAA  
ACAAAATAAAACAAAAGCCACTAGGAATTCAGCAAAAAAATGGCAAAAA  
AAATCCACTTTGGGGTGAAAAAATCTTGTCATCTATATGCTTGCAGTTGA  
GACTTTCACATACTCTTCAGGAAATATTTGAGTGATTCTCTAAAATATC  
TTCTTGAGAGCCTTGTCATGAAATCTGATGAGCCTATCATTTGGACCTGAG  
TCTACATCTTTTATTAATCCAGGATTGAAGCAAAAGGAAGGATAGAATT  
TCTAAGTCACCATAAAGGACAATTTTTTTTTTTTTTGCAAAATTTAAAC  
TTTTTATTTTCTTTGTTTTAATCTTTTCTTCCAATTTTTTTCTTTTCTT  
CCAATTTGAACCTATTAGGTTTAGCTAACGATTTTTTATATTATTATTGTT  
TTATTATTAATGTCTAAGGAAGTCTCGGTAGATCTGTGACGGAGACTTG  
CTTTTAGTACATATGTGCCCTGGTGGTCTTGTTGGGTATTCATAAATAT  
TACAGCCAGACTTTTAATAGACATTCTAAACGAAAAATAGAAGTCAACTGC  
TAAATTTAATTTTCTGTGTAAATAAAAGAAGTAGCAAGAGACTAAAAC  
ATTGGCTGGGGCTGGGGTTTCAATTTGGGGAGCTCCCATAGGCTATATATCA  
CCCTGTGTGGCTTTCAATTTCTTGGTGCAAATTGATTAAATATGCAACAT  
GATTAGATGAATGATGTCCCCTTGGGAAGAAATAATCTTGCCAAAGAGATC  
TTGTTTAACTCTGCTCCTCTGTCCCCCTCTGACCTTTGTAGTGGTTTTTG  
ATCCTGCAGAGAGAACGAGATAAGAGCTGGTGCTATCACCAGCAACAGGG  
TCCTGTTCTTAGTAAGGTGGCATCTCTGTATCTATCTTCCCCACAGAAG  
GATGAAAACTTTGAAAAACCATGCCCTCAGGAGCGCAAGGATTCCTGCTT  
CCTTTCATTTTCTTGACTGGGTTTTATTTCTGTATATTCTACAGTAATAT  
GGTTGAAAATTGTGCCTGCTTCTGCATTCAATAACTTTCACAATCAGTTC  
CTCTTAAATTTAGACCTAAGAAACCATCCGTATCGTCAGTTAAATACTT  
AGTTGTGTTTTTTATAATAGGTAAATCTACATAACCTATTATTCCCTGTT  
TGCTTTGAGAGAACTAACCCTAAGGCAAACTCCCATTTTTGTTTCTTGC  
AACCATCCTACAACATATTGCCATAAAGTGCAGCCTTGGGATCCAGACTG  
CCTAGATTGAAACCCCAGCTCCTCTAGTAAGTACCTGAGTAACCTCAGTC  
GAGTTATTACAGCCTCTCTGTGCTTCAGTTTTCTTGTTTGTAAGGAAG  
TAATACAATTACCTGCTTTGTTGGGTGGTATGAAGATGCTTTGAAATAAT

GTATGCACAATACTCAAAAGATCACCCAAAGCATTGTAAGATTAGTGTTA  
TTACAGAAATTATGTCATGAATTTTCATGGTCTCTCCCTTTTGGAATGC  
ATGATTTAAATATATTTTAAATTTGTAGGCTGCCTTAACCTTACCTGGAA  
TGCAGATGGTCTGAATTATTTTAAACAAATAACAAGTATTAACCTATTCTA  
ACAATCAAATGACAGGGCATATTTAGTAGGTAAAAATTTGGAATTGTAGA  
AAATTATAAAGAGGAAATTAAATAAAAAATCAACTACAATTCAACTGAATG  
AAATAGCTTTTTTAATTTTTTATATATTCATTTCAACCTGTTTCTCACATTT  
TTATCATAAGGTTTATTTTATTTTAAATATGTTATTTATTTATAAATAAA  
GAGAGAAAGAGAAAGAGAAAGAGAGGCAGAGAGAGCACAAGCCAGGGCAG  
GGAAAGGAGGGAGAGAAAGAAAGAGAGAGAGAGAGAGAGAGAGAGAGA  
GAGAAGCAGACTCCCCACTGAGCAGAGAGCCCAACATGGGGCTCAATCCT  
CAGACCCTGGGGTCATGACCCAAGCTGAAGGCAGACACCTAACTGACTGA  
ACCATCCAGGTTCCCTCATTGTAGGGTTTAAATTATATATCCTGATTTTT  
CTTTTCATTTACTGTGTATCAGAACTTTCTAAAGTCATTAAATATTCTTA  
GAAACATGATTTTTTAAGACCTACATAAAATTCTATTATAGGACTACACCA  
TTAATATATCCAACAAGTAGGTATTCAATATGAATGAATTAATAAATAA  
AGTTGCAACTTTTAGTGAGAAAATTATGTGGCATTATCTACTTGGCAGCT  
GAATCAAGCAAACACTTTTTAATATTGGGCTTCCTTCCTTATAATGCCCT  
AAGCAGTTAGGAAAGCAAAAAATTTGTTTCTCAACTCCCCCAAACCTCTCCA  
GATTATTAGGTTCCCATACTTATGGTCACACAAATTTTCTCTGCTCCTGG  
GAAGAATTTTATATTAGGCAAAACCTTGCTCATAATAACAGATACTTGAAT  
GTCAAAATGCAGCATGGTGTGATCGCTGAAGGCTCTGGGCTTTCTCCC  
TGCCACTTACGGTTTCCAGAAGGAAGATATTTCTCATCACTGTGGCTGAG  
CATTCGTTTGTCTTCAAAACACAGCCTAAGGATTTTGAGTTTTTCCTTA  
ATTGTCCAGCTTTAAAAAGATAGTGGTATTTTAAAGCTCTTTTGGCTGG  
AAGGACAAGAAAATACCCTTTTCAGACATTTGTGAGTTCTTCTCTTCATC  
CTTATTAGGTACATACAGATTGATGAATACATTTTCTAGACTCTCAATGT  
CAACATGCATTGTTAGTATGGTGTATACCTGGAAAAATATTGGAAAAAA  
ATGTATTCCTGGCAGCTTACTAAAGTATCAGTTATATAACCATCACATG  
TGATTAGGGCTCTGATAGAGTTGGATGCCAACAGGTAAAAATGTACATAGA  
AGATGCCTTGACTTTTCTTAAATAATATTTTAAATATTTTATTTATTTA  
TGAGAGAGAGAGACAGAGACAGAGACATAGGCAGAGGGAGAAGCAGGCTC  
CATGCAGGAAGCCTTGATCCTGTGACCTGGGCCGAAGGCAGGCGTTAAAC  
CATTGAGCCACCCAGGGATCCCAACCTTGACTTTTCTAGGGATGTTGGAC  
TACTTCAAAGACACTGGTAATGCTTAGGTTGTTTTTTTGGAGAGGTGTTAT  
ATTGGAGTATGCAGTGTGGTGACCAATGCCATAAACCTTTGTGGCTCAAC  
ATGTTAAAGCTCATTTATCATCCCTGCTAATTCTAGCATGGATTTCTTC  
ATCAGATTTCTTCATCAAAGGCCCTCCTCAGTAGCTCTTCTCCAAGTGAG  
AAGTGAGGAAGCCAGAATCCCTCCATTTTGTGATATGCTGTCTCCTAGAA  
AAGTGAAAGGTACATTGGGTCTCCTGTATCTACCTGGCAAATTGACAAGT  
AGAGAGAGTTTGGAGGATCCTAAGAGGGCCAATCTTGAGTGATGTTTCATC  
ACGTCGCCTACATTGTATTGGTTAGCACTCAGTCACAAGGAGATCTACCT  
TAACTATGGGGCCAGGTGACAAAGGAAGTGATGTATTAGACACGTAGCAG  
AGTCTCTGCCAGGGAGGTGTTTTCTACACAAATGATAGACATTATAGGTT  
ATTATAGATGGAATTATACATTTTTTAAAGTTTTTAAATTTGAAAAGCAAAA  
ACTTGGAATCGAGAAATAAAGGAGGTGAGGCATTTCCATAGTCAGCCAGT  
ATATATGGGACCTTTCTATGTGTTGGGTTTAGTTTCTTTCTTTACATATT  
TATCTGTCTAGGGAATTTAAATATTTTTTTTTTCTTCCTGGGAAAGGAATTT  
CCTCTGTACCAAACAGGCTGGTGCCTTTTTCTCTGTGACTTCAAACCTGGG  
GGTTCTCTGAAATTTATACCAAAGTCTTCTTGCCCTACTGCTCGAT  
TAAAGGGAGTCACCTCTATGCAGTCACACAAAGGACAGAACTATATATGG  
ATAAATAATTTCTGCAAACAGAAATTTATATATATTCCAAACTACATATA  
TAATTGATTATTCCTTAGAAAACCTTTATATTATATATTATATTATTATTA  
ATATATTATATTATTTATTTATATTATATTATATTATATTATATTATTA  
TATTATATTATATTATATTATTTTAAAGGGTAAAGAATGTAAGAGGTTAT  
AGTTTGAGATGTAAATTTTTATCCAGAATAGCATACTACATTCTGTCTGT  
AGGTCAATGGTTCTCAAACAAGGCTGTATCCAGATTTGTCAGGAAGTTT  
GTTTTGGTTTTAATACAGACTCCTACCTCCTAATGAAAGCAGGCATTTTT

TGAGTTCCTTTCTATGTACCAGGCAAGTATAAGTGTTATTTCTATGCTACA  
GATGGGAAAATTTAGGCAGCAAACTAAATAACTCCACAGTTACCTAGCT  
AGTAATGGAAGAGCTGGAATCCACACCAAGGCAGTCTGGCTCCAGACCTG  
GGCACCACACTGGCATATCCATCAATATTTTCAGGGAAGGAGCCCAGAATG  
TTGTATGTTTTGAAAAGTCCTAGAGGATACTCATGCTCATCTGGACTTGG  
GAACCACCGTTCTGGCACATTTCTGTTTGAAAGTGCACCTACAAACAGAT  
TGTGGTTCTTCTAACATCTGTGCTAATATTGTATTAAGTGTTAGGCATTT  
AGGGAAAAGGCTGCTTTAATTTGTTTTAGAGGTTTCGACATAGCTTCAT  
AAGCAAATTACTTTAATAATATAAAAAGATAACCAGTGTGCCAGAAATATAT  
CTCACTTGAAGAATATGAACGGTACTGATAATGACTGCTAAAACCTATTG  
TAAACATTGGGCTGAGTGCTTTATATTTACTCTCTGTAATTCCTACAGT  
ATTGTCACCATTATAAGATGATAAAATTGAAGCTGTGGAAAGGTCCAAAG  
TACAAAGCCTAGATTAGAAGTACCTTACGTTGATTACAAAGTTCTTTTTT  
CTCATTTAGTCTGAAGACATCCTCTTCATATATTGAGTGTGAAGCAGCAT  
CTTACAAGTCTGTATCTGTGCCCATTTTAACTTAGATCCTCCTTTGAATA  
ATGGCATGGGATAATGGCCCAGTACTTTCTACTGCAAAAACAGTTTCGGG  
TTCTGTCTAGAGGACTATAATTTTCTTTGAGTCCTACAGTTTCTGATAAA  
TATAAGTAAAAATAATTCTGTTCTTTATAAGGTTGCTGGGATAGTAAAGA  
GGGGATTAGGGCAGCCCGGGTGGCTCAGCGGGTAAGCGCTTGCCTTTGGC  
CCAGGGCCTGATCCTGGAGACCTGGGATCGAGTCCCGCATCGGGCTCCCT  
GCATGGAGCCTGCTTCTCCCTCTGCCTGTGTCTCTGCCTCTCTCTCTC  
ATAAATAAATAAATATTTTTTTTTTAAAAAAGAGAGGATTAACACAAT  
TGTAATCTGTGAAGAAAACCAAGAAGAGATTAGTAGGGTGTCAAATTAAGG  
AGCTAAAAAGAATCGTGGCAATGTAGTATGATAAAGTTAGCAATGTAGCA  
TGCATTTCTATAGCAAATAAGGAAGAACTTTCTCTGAGTTAATAATTATG  
TGACTCTTTGGGTCCATTCTTTTTTTTTTTTTTTTTTAAAGATTTTAT  
TTGACAGCAGGGCAGAGGGAGAGGGAGAAGCAGGCTCCCCGCTGAGCAGG  
GATCCCGAAAAGGAGCTCGACCCCAGGCTCTTTGGGTCCATGCTAGAAG  
AGACTCAAGTAAATAGAAATATACGCACATTAAGTGTAAAAACAGCTGG  
TTACACTCAAAATTTCTAGCCCTCACTCAGTTACTGTCACGTATTAGTTG  
GCCTCAGGCAACTTATTTAGCTTCTTTGTATCTCAGACTCCCTAGCTATA  
GATCATGAATGCACCAATATATTTTATATTCTTCTTTCCAAGTCCAAAT  
AAAAATGAGTCATCTATATTTAAATTAGAAGTCACAAATGAGAAGAAAA  
GGATATCACCATATGCCATGTTTCCAAGAATCTTAAATCCCAGGAAATCA  
GATAAGTCAAATGATATGAGGGACTTATCTAAGTTGCAGAAGCCCAGAAA  
GACCACCTTGACTCACACTCCAGAAGCCATGCTGAGCATCCTCTCCATTT  
AGAGTGAAAAAAGTATATATATATAAATATATATATATAATTTATTTA  
TAAATATATTTTATATATTTTATGTTTATATGTCTATATCAGAAGAGAA  
ATGCTAAACTAAGATCCTCCTTGGTAGACTATTTATAGGTCTTGATAAGA  
CTTTTAGACATCACCAAGGAAAGAATAAAATACTTATGAGATTCTTCTGA  
ATGTTGCATAACTAGAACTTGAATTCTTAGAACTTGAAGTGGGAGTATA  
TATAAATTTGTACAACCTCTTGGAACTGTTTACTTTTATCTATTGAA  
GCTAAACATATGCGTAGCATATGGCCCATGTATGTGTCTGGAATGTTT  
TAATCCTTGATCTGGGCACACTTACATGGTTATACTCAGTTTGAAAATC  
TATTAAAGTTATAACTTAAATGTTGAGAATGTTTCTATATATTTGTTATA  
CTTTTTTATAACTTTTTTTTTTTTTTATCACCAGTCGTCCAACAATTTCCC  
CACAATAACTATCCTTCTGCATTGTGTTTGGTGTGATAGGAGTTTGTGTCT  
CCGTTCCTAATTCTCGGAAGTGTGGAAGCAATTGTAGGTCGTTTAAA  
ACATTAACCTATAAGTGACTAAGGTCACCTATAAAGGCAAGCAATCTTATT  
TCTGCCACTATAATATTCATCTATCTTGTAGCGATCAATCAAGGCAA  
ACTGTCTTCCTCCAGGCAATTTGATGAAGTCAATCCTGCTCCTAGCTTC  
TGGAACATTTGACAAACATAATCCTATATGTCCATCTCATGTCCCTGAAC  
ACAGTGAAGAATTTATAAATAGGCACATACCCCAAGTTAGGCCAGTCAAA  
GCCAGCAAAATTTCCAAAGCCTTTGTTTGATCTCTCAGAACTTCCTTTC  
TCACTAGACACACGTGAGGGAAAATAAAGCTTCAGAGTGAGAAAGAACTG  
TCAAAAATAGGAAGTGAAGACTTCAGTCAACACCACATAGAGTCAAGTGT  
TGAATTTAATCATGGGTGAAACTAGACCTTTGGTAGACCTTTCTAATTAT  
GAGAGACAACAACTACCTTTTGTCTCAAGACCATTTGTCATGGATATTC

TGTCTCTAACATAGACTTCCCTTCAACAATCTCCATAAAATACTGTGTTTA  
TTTTAGAAGGTGTCTCCTTCTGACAGCTACTTCCACCTACTGTATCGGAA  
TAAGCTCAAGCATGTTGAGAAAATAAGATGGAATTCCCAGGAGCTTTGTCT  
CTGAAATTCTCTTCCAAGCTGAGGAAGGGCAATCAATGTCCGGATGACCA  
CACAATCTTCTTGGCACATGTCCTCTTGTCTCTGAGAAGACCCTTTTCT  
AAAGCCCTTATGTTCCCTTCCCTTGGCCATCACCAGAGACTAACACAGAAA  
CACAGCAATGCAAACTCCCTTACCTGCCAATGGCAGGCCCTGAGTTT  
TGTGATCCAGAGGGTAAGGAGTAGTGGTGGGGGAGAGAATCCATCTGGCT  
GCTGATGGCATGTAAGCCAAGTTAGTGGAGCATAGATCCACACAGAAGAG  
GAAAAAGACCCTTAATAAATCTCCGATTGAGAAATGTATACTAAGCATCT  
CTTCTTAGAGCTTAGAAGCCAGCCTGTACCTCCTTAAGTTTGAACTT  
TATCATTTGGTAGAGGCAGTAAATAAATTCTCCTAGATGCTGCCATTAAGG  
AGTTAAGAAACACCCTGGCTTTTTTTTTTTTTTCTTCTTCTTTTCT  
CTTCTTTCTCTTTGGGTATTAAGATAATAAAAGGCACACATTTTAAACTA  
ATTTGCCCTCTAAAAAATTAAGCATTTTTTACCACTGTTTGCTTTTCTAG  
TTTCTTTAATTTGGGTAATTGCTTAGTCAACTTTCAAAAATATATATTCT  
GTCTTAAAAAACAGCCAAATATGACGGATCACCTTCATTTTCATTTTCAG  
ATTTGGCATGCTGGACCCAGATTGTGTATTCTTTCCATGGCGCCACACCA  
GCGTCGGATACTTAATTAATTTCCCTTCGTTTGTGCAGGCTTGCACTTAA  
AGGGACAGTGTCCCATTTTGATGGCTTGCTTTTGGCTGAAGTTCAAAAGT  
ATCACTTCTTAAATCTTTTTTTTTTCCCTTCAAACTTCCCAGAGTGCT  
ATATAGAAAAAATAAAATAAAATAAAACACCCTGGTGTTTTTCTCCAC  
CCTCACCTTCTCTACACCACCATCTCTTTTACTCATATTTATTTTTTAT  
TTAAACCAATCTTTCCTTAAAAAGAAAAAAGAAAGAAAGAGAGAG  
GGATAGAGACAGAGAAGGAATCAATGAAAGAAAGTACAAGATGTGTGCTC  
TCTTATTCCACCACCACTCCCAACCCCCCCCCCATGTTTGCTTTCAA  
GCTGGCAGTGAGGCTGCACTTCAAGATGATGTCAACTGGTCAGAATCATC  
GGGAATGATCAAAGACTTTTTTAAGATTAAGATAATATCTTCTCACCACA  
AAGGAAGACCTGCAACCTTCTCATCATATATTTAACACCATCCTTATGGT  
AAAACAAAATATTCTTAAAGACAAGTGATAGCCAGGTACATTTGGGAGTA  
GATATGCAGTCTGGCATTTGAGAGGAAGTGAGGAAGTTGAGGGTAATAGA  
GACTGGTAACACCAGAAAACATGCTTGCATTATGCACGTTTTTTCCTATT  
GGAATCTCCTTGATCATTGAGCATACCAAGTTATTCTAGAACATAATTT  
CTTGTTTCATATGTACCATATACCATAGCATTGAGTAGATCACATCCAGCA  
ATTTTTTATACTGTGCCCTGAACTAAAAGAACACATTTTGGAGTGCCTG  
GGTGGCTCAGTCAGTTGAACATCAGCCTTTACCTCAGGTCATAATCCCAG  
GGTCCTAGGATCCAGCCCTGCATGGGGGCTCCCACTCAGCAAGAAGTCTG  
CTTCTCCCTCTGCCCCCTCCTCCCCCTCCTGCTCATGTACATGTGTGTGCT  
CTCTCTCTCTCTCTCTCAAATAAATAAATAAATAATCTTTTTAAAAAG  
CCCACATTTTTTAACAATGGATTGTTGCACAGTGATAGCTTTTCCCAGCAT  
TTTGCCCAAGGAAAGGAGGTGGGGATGAAATATTTAATCCCCAGCCTGCA  
GACACTACATACATAGCATTTTCTATGGAGAATTTAACTTTAGCCCAGTT  
CTGAACCTTCATGTTTCCATTGCATTGTCTCTATGGCCCAATACTGGTAGA  
TTTCAAACATTTCTCTCTCTCTCTCTCTCTCTCTCTCTTTTCAATTTGTTTCCATT  
GTGGTAAATATACAAGGCATGAAATTAACCATTTTACTCATTTTTTAAGT  
ACTTCATTGGTATTAATACTTTTACATTATTGTGCAACCATTACCACCA  
TCTATCTCCTGAACTTTTTTCATCTTCCCAAACCTGAAACCATGTCTCCAT  
TAAACAGTAACCTCCCATTCCTTCTCTCCAGCCCCCTGGCAACCACCAAT  
CAGCTTTCTGTCTCTGTGAATTTGACTACATATTCTTGGTCCTCATGTAA  
GTACAATCATAAAGCATTTGTCTTTTACTACGGGCTTATTTGACTTAGC  
ATAATGTTTTTAAAGTTTATCCATATTGCAGCCTGTGTGAGAATCTCCTT  
CCTTTTTAATACTCAATAATATTCATTGTCTATATAGACCACATTTTGT  
TTATTTATTTATCCACGGATGCACACTTGGGTTTCTTCCACCTTCTGGCT  
ACTGAGAATAACACTATAAACATGGGTGTCCGAATACCTGTTTGAGTCCC  
TGCTATCAGATCTTTTGGATACATGCCACAGGGAAAACTACTGGATCAT  
ATATGGTACTTCTACTTTTGATTTTTTGAGGAGCTGCCATACTGTTTTCC  
ATAGTAGCTGCACCCTTCACATTACACCACCAGTGATAAGAATTTGT  
ATTTCTCCACATCCTCATCAACATTTATTATTTTCTAAATCATGACTCTG

TTGCCCAGTAGTTTGTCTAACTTCCTAGCAACTTCTTCTTTTATTAAGTTT  
AAAGGCCTTAAAAAAAAGAAAAGTTTGAAGGCCTTTCCCCAAACAAATTT  
AACTAGAGAAGATGTCTCTGTTGATTCTTCCCTTCCCAAGTTGAACTGGAA  
GGTAGATCAGAAAACAGGGAAACCTGTGAATGTAACCTTCTGGTTACTAA  
GACTGAACTACCTTCCATGCTCTGAAAGCAGAGGTTGAGCTTTTATAGA  
CTTGATGAAAATAATTCTTACTATAATCCGGCTGTGAGTGGGCAGGAATC  
TACTCTAAAATCATTCTTCTACAGTGAAAAGAAGTGATCAAATTTGGAAGGA  
ATGTTAAAGTAAAGCAATTCCCTTGTGTTGGTGGCCATAAAACAGCAGTCTCT  
AGTACCACCTCCTCACTCATCTTTATGGCCCCAGGCCCCCAGACAGTGGG  
GAACCCACACTTAATATTTTATGCTACCCCTTGGTAGTGGCTATACTGTC  
TATTCTATATAATATACATTTTCATAATATGTGTCCATTTAATACAGCAAA  
CATAATGTATTTGAGGGGTTTTGTCTATATTTTTATTCTATTGTTAACAAA  
AATAGAATTATGTACATCAGATATTATATCTATATAATAGAACCATAGCT  
GTTATAGCTTGCAAAAGCAGATGTTAAAAAGCAAACCTCCAACCTTGCCTCT  
TCTTATTCAGATGTCACTGAATCTTTGAGATCTTCCGACCTTCCTATTTA  
TTGCTCAACCTGTAGGGTCCCTCTAGGAAGTGTATTTTCCAAAATTGTTCT  
CACTATCCTGCTGTGATATTGACTTGTATCCCTCATATATATATATATAT  
TTTTTTTTTTTTTTTTTGCTCCAGTCCAGGATAGAGTTTGTCCAGGGTGAA  
TTTTTCCTACCCATCTAAAAATGTATCAAAGTGACCTAACATACATATTC  
AAGGAAGAGAAAAAGTATCAGGGAAGAAAAAGCCCTTCATACTATGCCCT  
TTACAATTTACTAATGACCAACAGCAACCAATGTTTCAGAATGCCTTGTG  
ACTGGTAAAAGGGAATTAAGAGGGCCCTCTATTAAAGGGAAATTGACTGT  
CTGATATATTGGCTAATAAAAAATTAGGAGGTCTCCCCATGTAGCTCACCTT  
AATCAAGCATGGCAAGTTAACACATCTACCAATAGGAAAAGGCCAACTTAC  
ACTGCCAGCTTGATAGCCTAGTCACAAATGGACAGAAATACTCACTAGGG  
GCAAAATTTCTCTGTAGCTAAAACCATCCACACAGGAAAAAGAGAGAATCC  
ACAATAGCAAGAGGGATCATAGTGTGACTACTAGTCATCCTCTTGTTG  
CCACATACTTGCCTTCAGAGTATAATCCCTAACAAACAAGAGATTTTTCCA  
ATGAAAGAGAAAAACAAGATGTCACCCTACTGTGCATACATTGAATGTTACT  
TTGCTGAGTGTATGCTATGAAGAACTGTGTAGCCTGCTCTACAAATACCA  
TATAATTTAATCTGCGTATCACCTACTTGGTATCATCCTCCTACAAGTAT  
CATCCTTCCCATTTTGCAAGTGAAGAACTGAATCAGGAAAAGTTACATAA  
GTCATCCGACAATACAGAAGAAATATAAAAACCTTTATCCATTAGATACA  
CAGATGTAAAAACAATGCTCCAACTTCCACTAAACAAAAATCATGTAAA  
CCTGGAGAAAATGATGTGTGAGCAGTACCCTGAATAATATAACATTCCAG  
CTCCAGAGTTGGCAAATTATAGCCCATGGACCAAATCCAGTTCACCATCT  
GTTTTTGTATGCCCCACCAACTAAGAATATTTTTTATATTGTTAAATGGT  
TGAAAGAAAAACCAAAAGAATATTTTATAACGCATAAAAAATTACATGAAA  
TTCAAATTTTTGTATCCATAAAATAAGTTTTATTGGAACATGATCATGCT  
TATTTATTTGCATGGTGTCTATGGCTACATGTGTACTTCGTGGGAGAGTT  
GAGGAGTTGCAACAGAGACCTTTTAGCTTGCAAAGCCTAAAATATTTACT  
ATTTGTTTTCTTACAGAAGAATTTTGCTGACTCCTGTTCTAGCCAACAGA  
CTCCTGTTCAAGGAAACATCTCACGTAATAAAGCCTTTACTATCATAATG  
ACCAGTGCATAAECTCAGTGTTCCTAAAATTTTCACTAAAGGTATAACACT  
AATGGACATATCCCAAATACATGAATCTGTGACTGTAAGATAAATTTGAT  
GTCAATTATTTCATTTCCCAAAAGGATTCACTACAGGATGTCATTTCTCAG  
TGATTTTCATCAGAGTATTTAGATAGGATTTGACTTACCAAACCTGATTT  
CATTCACTCTTTTCATAAACATACACATTAGGTAAAAATGAGATACACCTGT  
TCTACCAAACCTCAGTGCAATACAAATCTGTCTTGAATGCCATCCAAGGGA  
GGTTAATTTTTCAAGGACCAAGAGGACCTCATTATAACCACTGCTCCTTC  
TGCCCTTAGACGCCCCATAGCACAGACTCCCATGAGCAACTTTCCAGCCAG  
GTCCCAGCATACTCAGGCAGAGTGAAGCTAGAAAATCAAGATTTGGCTTC  
AGACAGCTCTCAGCCAGGAAAAACAACCAGGTTCTGGGGGATCAGCAGAAG  
AAATAAAATTGTGAGTGGGCCTTTTTTACAGAAATAAAAGAGTACATAAGG  
TAGGTGAGACAGTGTAGACAATAAAATTTAAGATACTCAAAATATCCCAT  
ATCAAAGCCAGAGGAGACCTAACACTGTTTTAGGGATGTTTCCAGTGTTT  
CATTTATTTAACACATGGAGCTTGATGGTAGGTATTCATTCTGGAACAAT  
GAGCAAAAAAAGGTTTAGTCATTAACTAATAACAAATACAAAATAAGCTCA

TGGACTCATGGGCTAAGTCTGGGATACAAAACCAGTCCCTGGAGAGTTCT  
TAAATGAAAATAAGTTCCCTTGAAAAAGTAAATGCGTTAGATTTTCATG  
TGGGTTCCCTATTTGAATTTGGTTATTATGACTCAGGAGACATCTCTGGTA  
TCTTTTTGTATGTGTTAGAATTTCCCTTGACTGCCCTATTTAAAATTAAAA  
TTTCTCCCAACTATTCTTACTCCTTTTCCCTCCATTATTTTCTCCCCAAC  
ACTCGTTATCATCTGGCAACATATATGTTTCAGTTATTCAATTTGCTTATA  
GTCTGTCTCCTCTTTCTAGAATGTGAGCCCCATAAAGGCAAAGATTTTGT  
CTGTTTTGCCTCCTGAATTCTCACCCCAATGTCTAACCCAAGTATGGACT  
TGAGAAGTATTCCTGAAGGAATAAAGTAACTGAAAGGAGATTTCTTATCA  
AAACACCAGAATGAACCCCTTCACTTTTGTAAACTCTCTCCAGAGATGAT  
CACTCCTCCCCTCTGTACCCCTGCTCACCTTCCCTCAAAGGACAGGAATG  
CTAAAATGATCTCTAGATCTTTAAACCATCAAAGAGTAATTTGTTCTCTT  
CCTGGCTGTTTTTTGCATTTGCTTTTATGCTACCAGTCAGAACTAAACAA  
ATAACCAATATTCAAAAATCTGGCAACTGACACTACACAAGGACTTGATA  
CATGCATGTGACTCTCTGAATTCCTAAATGAATAAAATAAATGAATGAGAC  
AGATGATAGCAAATGAATTAACATGCATTGGTAACTGATCACCAACAAGA  
AGGTTCAATTCTGCAAATTTAAATGGTTAGTTTCCTTGATATTATTCTTTC  
CAGGTTCTCCTCAACTGTTTCTGATCTTTAGTTTCTTTCTAAAGATTACT  
TTCTTTTACGTTTACCTTTACCTTAAATGAAGATATACTCTGTGGTTGCA  
AAATATGCTAGTATTTTACATGTTTTTTTACATAAAAGTAACACATAAGAG  
GTGATAACATTCTTACAGCATATGGACAGGAGAATGATAAAGCTACCTGT  
GGCCGAACGTTGCTGGTCCCTGGGATTCTGGTGGCCACACCCAGCTATGT  
GATCCAGGACACCCAATAGCAGCCCCAAAGTTAAAGGAATCAACATGTCT  
GTGTAATTGCAACCCAACATAAGGCAAGCCAGGATACTGGCACCACAGCAA  
CTGGGAAACTCTGTTCTGCTCATCGGCTTCTATGCTTCCCTGGTCAATCC  
TATTCACTTATATTTTTAATCATCACCTAGAGACCAATAACTCCCATATG  
TATCCTCCTTCTCCAAATATCCACCTCTTTCTTGTCTCCAGATCTAGAA  
TCACATGTGCCACCACTGATTGGATATGTAACCCAGTTAGGATGTTCCAC  
CCCTGTATCCTCTGCTTAAAGTATCCTCTACTTACAGCACAGTTCCTACCA  
GATTTCTCCCTCCTAAGTGGCAATTAAGCCTGTGACCCAACTAGAAATC  
TGGGAGTCATCTTTATTCATTATCATCCTCTGTATGCCAAGAATCCCCGA  
GCCAGCCACGCCACTCTCTCTTACATCAGCTGCCTCTCCTTTAGTTCAA  
GCTTGTGTTATCTTTCACCTGAACGATGCAAGCCTCCTAATGTGTCTTAG  
CTATCCAAACTACTACCGATGGGCTGGAGTAGGCTGTCCTGGTTTATGA  
GAGTTGTGCTTTTCCAAACTCTGGATTCAAGTTAGTAGCTT  
AAAATCTGCCAAGGTGGGAGTATTTACAACATAGAAATTTGGCAAATGCTA  
TTATCAAGAATTTGCTTTCAAACAGGCAGTTGTTAAACATTCACTAGCAT  
ATTATTCATTGCTCAAATGTATCCTTTACAGAGAATGAAGTATTGAAAAC  
AAAAATTTAGCCATGCCACACATTTGTTTAAACAATTCTGTGATTCCCAA  
TTTCTGTTAAGATTAACTCAAGCTCTTAAATGTTACAGGAAGGCCTTCT  
GAGACCCACTGTCCCCTCCTACAGTCTTATCTGGTAATATACCCCTCCT  
TGACAGATGCTTTTGGCAACATGAACTTCTTGTAATCTCCCATCTATCA  
GACTATTCCCTGACTCTATAATTTTGTATAAACTATCCTGGAAGCTTCAA  
TCTCTCCGTTAGATTACTCCCTTTTGTATGACTATCTCTTTACTCACAG  
TTTACTGTACAGTGAAGACAGTAGTGTCTGCACAAATTATTTTCTGATCA  
CTCCTAAGCTATTATGACTACTTATTCTCTTCTAGGTGCTGAGAGCCCCA  
TCTTCAAATTTCTATAGTTGCATTTACTGCATTCTATTATGAGTCTGTAT  
CTCCCTTCCCTTATCCCCAGGGAAATATCTAACAGTGAAGAGTATGTATA  
TTCATCTTTGTACCCCCAGTTCTTAAACAGTAACTTATAGATATTTTAAG  
TTCAATCTATATTTAGTATATATATAGATAAATGGATATATAAATGAATG  
AATGAATGAACACTAGTATGGCTACAGTAATTTATAACACTTTGAAATA  
TACTAAAACCTGGAATTCATGCTTTCTAGTTTATTAAATGAGGTTTCCTTA  
ATTATATGGGAATGTAGGGGCTCTTGGATTTTAGCCACACCCATACTGAA  
GGTCCCTGCTGGAGGCTATTATAAATATGTTCTTGTGAAGCTCATTCCCT  
TTTCTATATTGACCTATTGTCTATGCAACTGGCTTGATGATAGCAGACCT  
CCAAATCAACTGGCCACCCATTTACAATGAGAAAATGTGTGTTAGATTAT  
GTATATCTGGGGAGTGAGAAAAGTCAGGGAGGAGGCTTAATAGACAGAAG  
GGTGTGGTAAACTTCTGGTTACCAAGGTCAACAGTATTTGTTTTCTTCC

TTCTGATAGAGAGCCAATCACTAAGAGGACTCTGTTTTAAATGCATTA  
CACAATGTTGTCTTGAACAGATTTTCAGAATTGGTTTTCTCTCTGTTAT  
TTTTACATTAAAATGCAGTGAGACTTCTGTACATTAAGTACTATTGTGAG  
TTTTGAAATGCAGTACTGTGGTTAGCAAGGGAGGCAAAACATTTATTACT  
AAGAGACAACATTTCTTGAATAACTTTGTCAAAGAGGAGAGATAAGAGCT  
TCCTGAGTTGTAGCTCAACCAGTAGTAGCTAAGACATTTAAACAATATTC  
TTTTCTTTTCCTTCCTGAAAAAAAATGATTTTAGGAAATTTTGCAGTAA  
CAAAAAAGAGCTTTCTTTACTATACCTGTCTTTTTTTTTTAAAAGTCTCAA  
GAAAGTACTGAAAGTGCCAAAAAAAAAAAAAAAAAGAAAAGAAAAGAAAG  
TACTGAAAGTGGTAATTACATGAGTATGTATGTATTAGATGTATTTATTT  
TATTAGTATGGTATTTAAATATTTTCAGAGAATATCAGGACACATTATGCA  
GCCATTAATTAATTTAGAAATCAATAGAAGTTTGCTAATTTCAAAAAATA  
GTTATTGAAAGCGTTCTGAAAAATTCTGATGATTTTCTCTATACCACCCC  
CACAACCTCATCACCACCATCAATAGTACCAGTAACCATCTGTCTACCCA  
CAGATATACCAAAAAGGTGACATTTTATTGCAAGCTTAACATTTTCTGAA  
TCTGTCTTAAACCACAAAAATTATGCTGAACTCCCCAAAAGAAGTGAAGT  
TGTTTTTACTTTTTCTTCATCTCTCTCTTTTTTGCTGACTAGTAACAGGA  
AGTTCTTGGAACCTTCCCAGAGAATGGCTGGTCTTGTAAGAGTCCCAAAC  
CAATCTTGTAGGCGCCAGAGTCTTGGCACATTTGAGATACAGGTTTTCGA  
AGCACCTGCATTGCCCCCTTCGACCAAACCTTCCCATCACTAAGCTGAAGA  
AATTCCTTGTGTGCTTATTAGTCATGAGCCTGAGTTGAGGAGGGGGTCA  
TAGAAAAAGGTACAAAGCTTGCCCCAGTCAATCTTGTTACTGATCATA  
CAAGATGTAGAAAATATCTATGAAGTATCTTCAAGTTTGTAGTCAAATTG  
GACCTCACATGAACCCTGAGGTCAAACATAATCTATTCCCTATTCTGA  
ATTTATCCACTTGACAAATAAAATGCACAGAAGGAGGGAAAATTCATGCC  
ATGGCACCTCATTATTTGTTAGGAACAGATTCTTTTTTTCACCTTGAGCT  
CCTCAAGAATGATTTGTGAGGCAGCTCACTTCCATTCCCTGCTTCAGTCTA  
CACCAAGCAATCTTAAACCTTGCGTCCATTCTCTCTTCTCCATTCT  
GTGGTTAGAATCTGAAAGAGTTGGAGACAACGCAAGAACACAGTGATT  
TTTTTTGCAGGAATACTCCCCACTTCCTGGAGCTAAATGGGGTCTACCT  
GGTATTGTTCTGGACCTGCGGTTACATCCAGAAAAATCACAGGATAGCATG  
AGGGTGCTAGGTTAAAGGAGACCTCTAAAGTCTTTGGCAGGGGCTGCCA  
ATAGCCATAAAGATCAGGTAATCACTGCACTAAAGGAAGGGAAGGGGCT  
TTGGCCAAGTTGTGGTTGAGAAATTTTGTGCTCTCTTTTTCTTACT  
TCTGTTAGTTCCTTAACTTCCCAGTTCCAACAGCAGCTTCAATCCTAAGG  
ATGTAACCTCCCTTATTAAACAAATGCATGGATTTCCATGAAAGTAACCC  
AAACCCACAAAATGGATTCCTAATTCAGCTCATCAAAGTATGCAAACACA  
CCTTTAAATATTTTTCTTATTTAAAGTCCCAAGGCAGGGCAACTGAGTGG  
CTCAGTTGGTTGGGAATCTGCCTTCAGCTCAGGTCTTAATCTCAGGGTCC  
TGGGATCCAGCTCTGAATCTGGCTCCCTGCTCAGTGGGAATCTGCTTCT  
CTCTCTTTCCCTTTGCTCCTACTCCTACTCCCTCTCTCACCTCTCGGTC  
AAATAAATAAATAAATATTTTTTAAAAATTAAATCCCATGACTTTTGGG  
AACAAAAATTTTCTAAAGAAACAAATAATAGTTATAATTTCCCATCAGT  
AAAAATTAGTAAATTGATCAATGGCTAATAATAGAGAAAAATTACTGAGA  
GTTTATTTTGTGCCTGGGATTGTTGAAGTACTTTAACTGCAGTAGCTCA  
TCGAATATTTAACAAAATCCTTTGTGTGGCAGTCATGGTGGTTGCTTTCT  
GAATTCTAAGTGATTATCTTAAGATACCCATTATAATGGCATGCTTTTTT  
TCAGTGTTGATTGTCATGGGCATATGACCAATGCCTATCTAATAAGATA  
TGAAAAGAAGCCTGTAAAGGGGCTTTTGGAATGATTTCTTACTCCTAA  
AAAGTATGTGCAAGAAAGAGATAATCTTTCTTCTTACATCACATCGATAT  
CCCTGGATGCGACATCTGGAGTTAATGCAACCCACACTGCCACCATAAGA  
TAGAACAGGGGAAAGATAGAAAAAATTGAGCCCTGAGATGGTACTATTG  
AATCATTTGATCATACTTCCCTGAAGTGTACTATCTTCTGTCTTCCACT  
TGTGTGAGATAATAAATTTTCACTTACTGAATAGGCCAACATGAATTGGGGT  
CTCTGTCTCTTTTTCAGCAAGAGGCATCTCAACTGATACACAATGTATTT  
TATAACATTGTCTTCTGCATTCAACAGGTGAAAAAAGTGGGCTCATAAA  
AGTAAAAATAAGTTTCTATGTATCTCAAGTTAGTAAATTTTGAACAGTGA  
CTTGAACCTAAGCAGTCAGAGTTCCAAACTCATACTCAAAATCACCATGCCA

TGCTTTAACAATAGTACAGAACAATAATGTTAAAGAAAACAGGCTGAGAT  
TGATTCCATGGGTAAATTGAAGCAATATCAGGAGATGATAGGGCACTCTG  
AGCCACTAAGACTCTGGAGTAATTAGACTGTTTGGTGCTCTCTTGAGAGT  
CCTACACAATTGTTTCAATAATCAACTCCGAAGTCAGTCATTGAACCCA  
TCAGGCACTGTTTTCCACAGGCTTACAGCTCCCTGCTTCATAGTAAAGCA  
GACAGACATGTAGAGAATTGACTATAAAAAGGCATTATAAGATAATGGCT  
ATAAAATTACTTTCTTTAAGGGCAAAGCAAAGAGTATTAATTCCAACGGA  
GAATGAATCTCTTCAGCCACTTTCCTCTTTTCATGGCTCGGGGTAGTGAAA  
GACCTCTCTCTGAGCCATTTCTTTCACTTAATTGCAAGTATAATTAAGCC  
TTCTGATCTTTTTATTTATTCCCCATAAACTTGCTCAAGACAGTCATCTC  
CAAGGATGAGGAAACAAGGTATCAAGGCTCCTGGAGACGGAATGGAGTGC  
ATTCCCTTCAATCAACCGATGGCTTGTCTAATATCTCTGGCTATGAAACC  
ATAAACAGATTGGTGCTGAAAGCAATTTTATCCTCATTCAATTAATTAACC  
ATTTAAATAAACTTTTTATCCTGCTACTCAAGGTCTCTATACATAGGCAT  
ACATTTTTTCAAGGTCATGAACATAATACTGAATTTTTTATCCACAAATACC  
ATAGATTTTGTCACTGATTGTTTACTCCCAGTGCATCTGTCCCCAGAGTGG  
CCAGGCTGCTCACAGCTACCAGATAGTATAGACCTAGTAGAACCCCTGGTG  
GCAGCAGTGCAATTGTCCCCCTTGGTAAAGTTATATAAGAATGACCCCAAC  
TATAACATCATTAACATCCTATTATATTTAGTGGGACAATATGAAGCCA  
CAGTTAACTGATAAACTCTTGCCCAACCCCATATATAATTTTTTTCTGTTA  
ATTCTCCGTGTGCTAAATATTCCCTTTCCACAAATGTCTAATTGGACTCAG  
AAGGGGAAAATAGAGTTTTACAGATGTTTGTTCAAAGAAAGGTTTCCAT  
CAAATTACTACTAAAAATGATACTCACTCTCATTTTAGAAGCATCCCTGC  
CTGAAGGAAAGGATGAGCTGGCCACGTTTTAGCCCTAGACCTAAGTCTAT  
AAGCAAGTTTTCTCATAAATGGTCATTGAGAAGAATTTCTTCCCACATTA  
TATGTCAAAGAGCTTTTTAAAGAACTGCTCTAAGTGAGAACATTTAGAAA  
TGCACATGCCCACATCGTAGGAAAGCCATCAACACTCTTGCAGAGCCATA  
TGCTTGCCCTCGAGGGACCCAAAACCTATTCCATTATACCAGAAAGTCTGT  
GGAATGTAAATCCAGGGGCTGAAATGCTGTATATTTTTCAAGAAGTACA  
AAGTGGAAGCCATTGAGTCCATGGATTACCAAATGAATGGATTGTTTCA  
TCTGCACAAATGAACTGTGAGAAACAATGGCCATATAACACATTTGTTCC  
TGTTCCCCAAAGAGGAAAAACACATATCCCAAATAAAGCTACATCTTTTT  
ATGAACTTAAGCAAAAAAGCTTAAAAAAGCTTGATTATACTC  
TAAAACTGGATGCCTGAATTCAGACAGCATGGGCTAGAAATATGCAGCT  
CATTTTTTTTTCTTATTACACATAAAGGTATTAGCTCTCTGCCTTTAGAA  
TGCAAATGGGTCTACAGCTATGGTTATCTGAGCAAATTTACAAAAACAC  
TTCTTGATTTCTGTCTAGTTTTATTTCTTATCACTCTTTTTTAATTCCT  
TTCTCCAATTTTTTACCCGTACTACTCTTTACCTTTTTTTACTCTCTC  
TCTTGTTTTTAAATATGATCTTTCATTAAGAAATATTCAAGACACACAGA  
AAGTTATAATGAATAATCTAAGAAACAATATTTTGTCTTTACTTACTACT  
ATTGTCAAATCTTAGTATTTTGAATTGGTCCAAATTTCTAAGAATTTTT  
TATATAAATTTATTTTTTATTGGGGTTCAATTTGCCAACATATAAAATAA  
CACCCAGTGCTCATCCCATCAAGTGCCCTCTCAGTGCCCATCACCCAGT  
CACTCCCAAGCCCTGCCCAAATTTCTAAGAAATTATTCTAAAGTTGATGC  
TTCTTGTTCCAATAGTTTCCAAAGTTATACATTTCTCCCTTTTATTAGTGA  
TCTCTTCTTCCCTGAGGTCAATTAATCTCTAAAATTTGGTATTTATTATTAT  
TCCTTCATACATACAGTACATAGCATTACATAGTATTTTAAATAGTATA  
ATACAGTACTAGTACAGAGTACATACATAGCAATACAGTATAGGATAT  
ATTTCTATCCTTATGCAACTTGTTTCACTGGCTGTTTATGTAAAACATTC  
TTGTGGGGGATGGGCAGGGGAAAGAGAGGGAGAGAATCTTCAGCAGGCT  
CCACGCCCAGCACAGAGCCTGACATGGAGCTCAATCTCTTGACCTTGAGA  
TCATGACCTAAGCCAAAATTAAGAATCCGATGCTTAACCAAATATGCCAC  
CCAGGTGACCCCTTAGCAAAACGTTCTTTTGAGCCTCATCAATATGTTATA  
TGTAGCCCCGAGTTTTTTCATTATTTATATATATATATTATATTATTA  
TATATATTATATATATTATATATGTATTATATATATATATTATATATAT  
TATATATATTATATATATTATATATATTATATATATATATTATATTCATG  
AATATATAACAGTTTGTCTAATTTATTTCTGATAGTCATTACATTCCTTT  
TCCATCATTGTGTTTCTTTCTTTCTCTATGATAACTTAGGATTTTCATG

GATTGGTTGTAGTGCTTCCTCTTTGCAAGGACATCCCTTTCATCGTAGGC  
AACAAATAGAATATCATCTGCACTTGTCTGCTTTGGCTAATTATTCATGTT  
TTTGTTCCTTTTATTTTCATACTGTATTATTAATGAGTTTGGGGCTGTT  
ATCATTCCTTTTTTCAGCATTGTATATTTAGGCAGATAGCTCTAGGACTAAT  
AGGAATCTTAGAAGTCATGCAGTCCAACCTTCTTTTCATAAACCATGACA  
CTAGCAAAAAAAAAAAAAAAAAAGATGAATGACTTGCCCCCTGGTCATATAA  
CTGCTTAATAAACAGTGTAGTTGAGGATCCAGATCTCCTGGATCTCTGTC  
CTTTCCTTTTTTCCAGTACACCAAACCTGTAGCTCACCCACTCAAGTGAACA  
TTATTTGTTGTGTATCACTGGTTTCCCAACAGCAGATCTTACATTCTGCT  
CATTAGAGCAAACCTAGGCACTATGGGAACATCCAAAAAGGCTCATGTCC  
TCAGGGCCATTAAATTGTAGATGAAGAGACTAAAGACAAATGAAAACATT  
AGAGGCAACTAAGTGAGCTAAATTCCAATAGCAAAGGCAGCAATTTCTCT  
ATCTGTACATCTATATATTTTTTAGTGAACCTCTGAGAATAAGGTGGAGGC  
ATCATACCACCTTTATTATATAGTATGTTTTTGTGTATTAGGAACAAAGAC  
ATTCTCTTACATAGCTACAAAAATTATCAAAATGCATTTTAGCATTGATAC  
GATGCTAATATCTAATTCACAGTCTATATTAATAATGTTATCTTGGGGCAC  
CTGGGTGGTTCAGTCAGTTCAGTGTCTGCCTTTGACTCAGATCATGATCC  
CAGAGTCCTAGGATTGAACCCCTGTATCCCATTGGGCTGCCTGCAACCCAC  
TGGGATCAGCAGGGAGTCTACTTATCCCTCTACCCCTCCCACCTTCTCCTG  
CATGTTAATGCTCTCTCTCTCAAATAAATAAAAAATCTTTTTAAAAATGTC  
ATCACTGATCCTTATAATGTTCTTTATAGCTTTCTCTCCTCTACCCAC  
TATAAGATCCAACCTCAGGATCATATATAAACTGTATAATTTCTAAGAAA  
AAGGTTTATCTTTGAGCTGTTTTTGATTTGTCCATGTATGTTACAGTTAC  
TGAAGATCTGCAGAGAGAGATCTCTGGTCTCCACACACTCAAGCCACACG  
ATGGAGGATGTATGAGGTAACATCTAATTTTTAATAGAGTTAGGGCCAGC  
CCTGAGACAGAGATAACCACCAGATACTATGCTGTGAGGAACATTCCAGG  
AAGAGGTTATATTGAAGCTTGGATTTCAAGGAGTGGAAGAGACTGCTAAC  
AGCTTTCCTGGCCAAAGCAGCATGTGCTATAACAAGATGAATCATAGACT  
ATTTAGAGAACAGCAAGTAGCTCAGTAGTTCAACAGAGTAAGGACTATGT  
GTACATATGTGTATATACATGTATGGGAACACACGTATGTATATGTGTGC  
AGATTTGGCAAGGTTTGGTGCTCCATGGAAATGGAAGTAGGTATGGGCTA  
TATCATAATAGGCCTTGTACATCCTAATGTGAAACATAATCCTGAAAACA  
ATGGAAAATCGTTGGAGAAATTTAAGCAGGGGGCCAATAAGTTGCGATAT  
GATTTCCCTTGTCTGAAAGATTAGTCTGACTGCTGCACTATACGAGTACT  
GCATCAATAGGATTGATAAATCAAGAGCTTGAAGTAGACCAATAGTACCC  
CTGAGTGAATTTAAATATTTTAAAGAGAGTAGAACTTACAACTGCTAG  
ATGGGGGATGATGGATAGTTGTGACACGGAGGAAGCTATCCAGAAAGAGT  
TCTCTGTTCCAGGATGGGTCTGGGCCCATTCTACAAAGGAAAACAGACA  
AAGTCTATGATTTACAGGCCATTGGAGCTTATTCTCCTAACATTCTCTCTA  
TTCTCTTTGGAAACATGGAAAAAGTACATCTTCCTGAGTCCTGCCACAC  
AGTTCCCTGACTCTTGACACAAAGCCTCCTTGTCTCCTAGAGGAGCCTTG  
GTCTGGTCTTGGTCCATGCTCCCTGGGTGATCTGGCCACTTCCCTGTTGC  
AGCTATTTCCCATTTCTCTTAAAGTAAGTAAGCAGCATGCCATCTTCCT  
TTCAGTGCTAGTTGGGTCTCATGCATATTCTGCCACCTACTGCTGCTCG  
ACTTTATATGCCTGTAAATGTTTTATATTTGGTGTTTCACTATTGCTTAGG  
GTGTTTATCCTTCCCCTTCTGCAAACCAATATAACCTTTTTTCATAAACTT  
GAATACATTTCTCAGCCAACAGCTTATTTAAAGATCTTAAAGTCCCTTAT  
TGAGTTCAACAGTGAGCTTATCTATTCAAGAACATCATTATGCCTCAAGG  
CTTTAATGATGCATCTTCCCTGTTGAGTCAGTTGGATTGCTTCTCAATC  
TTCAAATCTTTCCCAATAACATCAGCTTAGGTAGACTTATCTTATTCTCT  
CCTCCATATTATTGAGAATATATCATCGGTCTATAATTTCAAACACGAG  
TTTACAACTTAAACACTCTGCTATGGAAATGGGAAGGGAAAAGACAAGAT  
GTCCAAAAAGATGAAGTGAGTTAAGAATCCATCTTCAGTCTTTTCTGC  
TATGTTTCTTTAAATCTCAGTAGATATCCTGCTTTCTTTCCACTTTTACT  
TTCATGTAGACTGTGTCTCTAGATTTCTTTCTTTCTTATTCTCAGTATCA  
CTAACACCTAGCACATCTAACTTCTGATTGGGTCTCAAACCATTTTATT  
TTTGTCTACTAAATGCCAGTTCTACTGATTATTTCAAATCATCTTGAT  
TGCTCTTCTTGAATTCTATGCATGTATATCTGATATATTTTTCTTCTCTT

AATCTCTTCCCTTTTTGAGGAAGATGATGGTTCATCAAGAGAATTGAAAT  
GATAGGGATAACTATCTGAAAGATCATCTTCAGAAAGTGGACATGATATC  
TTTCTCTCTGCCTTCTGTTAGGAATTCATCTTCCTAAGGGCTATCTTCCA  
ATGCACCATTTCTAGCCTAAGTGGACGTTTAGTATTACTGAAATGCACTT  
GACATGTCCCTTCTTTCTTCTATACCCCACTCCACTTCCACACTCCATAG  
CTCCTCTTAACTTTACCATCCCTTCTACTTCTAAATACTTTCCCTCAGTG  
TTCCTTGAGGTCTTCCTAGATGCCTTCCTTGAGGGCAAAGCATGGTTGGT  
AAACCTTTGTTGTGTTTGCTACTGCCTTCTCCATATCCTTCCCATTTCAA  
TATGATAATAGAGGTAAGAATAAATAGGCTTCTACACCAAAAAGTATTGG  
TTATTGTTCTTGCCTTCTTACTATTTTCATCCCTATTGACTGGCCTGTCAT  
AACATGTGTCTTGGGAAGAAAAGTGTGACTACTACTGTGATCATAATGGA  
TCAGCCCTAGATCCCTGGTCAGTATCCAGGATGATGACTGAATCCTCAAA  
ATCAGACATAGGCTCAAATAATGAGCATGACTTTTTGGCCCTGTGATAAAA  
TAGTTTTGGATGTATATAAAAAATATATAGAAATGTTTCATCGAGGGTTGTT  
ATAATAAAAAATTTAGAATAAAAAGTCCAACATTAAGATGAATTGATTCA  
ATGAATTGTGAAAATGAGTTTAGACTTTAGCAGGAGGAATTTGGGAAGTC  
ATTGAAAATGTCAGAAGTGTTCTGATTGATTTTTGTTTTAGAAAGAGCAT  
CCTTTGCTAATGAAAAGAATAATTTGGAACGAGGCAAGAAGTGGAACTG  
AGTAATAATGGTAGCCTGGACTATGGTAATAGAAATGAATATGAAGAGAC  
ATGCTTAAGAACCTCAAGAAGAAAGAATTGGAAATACTTCGTGATTGATT  
GGATGTGGAAGTTGGGAGAAAAGCTCCCCCTAGTCAGACATTAATCATACC  
ACTTTAAGGTCTTTCTACACCTTTTTCTCTTCAGGGCCCTTCATGTGTGA  
ACCTATGTCACCTCACAGCACAGCCTTAGGAAATATTGTCAAACAGAAAAG  
TCTGTCTCCAGTGTCAACAGTCTCTTTGCTGTGCCCTAGCTTCCTTCTTC  
CTTCATACGACCTGCTTCCTTTAAATATAGACACCAACTCTGGAGTTGGT  
AGAGTCTGAGAAATCAAGATTTGGAGTCAGTCAGGCTCAGTTTTTAATTT  
GCTTCTGCCATTTACAAAATATGACACTGAGAAAGTTATTTAACTCATTA  
AGCCTGTTTTCTATTTTTGTAAACTAGGATAATAATGCATACTCAAGATA  
CAATAAGTAAAATATAAAAAATATTTTATATATATTTATAAATATATATAA  
ATCACCTAGCAATGTGTATGGCATAGAATAAATTCTCAAAAAAGTTGTTA  
TTAATGTAATCCTATCCAAGGAAAAAGAATAACTTTAATGTATATCTTTA  
CACTGTAAATGTCAGATGGTTTCTTCTTTTGGGAATATTTGTTTTTCAC  
TCTTGCTCTAATGATGAAATTATACACTCCACCTCTGACAGAGAAATTT  
GTGGCAAAGCCTAAGGTGGAAGAGGAATTTTTTTTTTTTTTTTTTTGGAA  
ACTAGGCCCATTC AACACTTTATCGTTCCCCCTCCAGCAACTACCTCCTC  
ACCTTTGCAGACATGATCTAAAATCACAGTCCTATAAATAAGAGGATCCC  
TGCTCTTTAAGTTTCTGGTCAGTGTTCTAACCAAGCTACTGCCTCAGAGT  
GTGATACTTAAAAGAATCAACTTACTCCTGGCTATGGAACCATGGGCAAG  
ATATGTAAATTTCTAAGGCTCAGGGTTTTTTTTATCGGTGTTCCGGGAAA  
AATAATAGCACTAAAAGAAGTAGATAATGGATAATTGGGTAAATCAGGA  
TTTAACGTGGGGCATAAAAGGTAACAAACAATACATGTTTACATTGTTAT  
TATTAGTAGTATTACTTCTCTAACTTTGTTCTATCAGTTTATTCTTCTC  
TCTCTCTACTGCTGCATATTTTCAGACAGTAGGCATTTACTTTACTGAGT  
ACTCATCTTGTGTAAACATTCCCAAATACATATTAAATATTGTAATTCCA  
CAAATAGCTTCTTGGTGAATAAACCTGTGATTTATGAGTTTTTTGTTCTCC  
TATTACTAGTATTTTTTTTATCTAGGCTTTTGATTTAGTATAGTTTTTCTT  
CTATGATTTTGCTATCATCTTTTTTATTATGAGCATCTTTTCCTTTAAGTC  
CTTGATCAAAAGTATAACAGCCACTTAAGAATTCTTGTCTGATTATTCCC  
ACTTCTGAACCATCTTGGTAGTAGTCTCCACTGATTTTTTTTATTGTTGTT  
CCCCCTGGGAAGGGCTTATGTTTCCCCATTACTTTATATGTAAAGTAACC  
TTGGTTTGTGCATTGGATATTAAAAATATGTTATAGGTACTCTGGGTTC  
GTTATGTTTTCCCTAAAGCATATGGACTTTTTAAAAATACAAGCATTA  
TAATAATAATAAATAAATAAATAAATAAATAAATAAATAAATAAATAA  
CATTAATTATCATAGCAAAATATTGTGGGCCAGAATGGATTTCCCCCTC  
TCCGTTCATTTTCTTACCCATCGTGATACATACTGAACTCCTTTTGCGAT  
CAGGACCACGCCAAGCTAAGATTTAAAAAATAAATAAATAAAGCAGGT  
AATACTTGACTGAATTCAAACCTCAAACCTCTGAAATATATTTTTTTAACC  
TTAGGCTACTTGGGGTCTTCCTTGAACATGTATGTATGATTCAAGAGTCA

ACTAGAGACTTGGGAAAAGTTTATACAAAGAATTTAAAGCTTCCCCTTTC  
TGGGATTCTCCTCTCCTAACTTCCCAGATACTATGATCACCAAAGACTCT  
TCTGGCTTTCCAGGCTAATATGACTAAGATTGTGTATCTGAGCTTCAGCT  
GTTCTACATAATGCAGACAGACTGCATTATGAGGGCCTGCCCTCAGGCTA  
AAAGCTCTGAAAAATGAGAACTCAACCAAGCTGTTACTATCTTTCCAAC  
ATCAACTTCCTTTCACTATCTGCCTGCCTTTGCTTATTACTTTTAGTGCC  
TTCATATATTTGCATTTTGTATTTTGTCCAGAATTCATTATTTTACCTA  
TGAGAGTATTGGTCTGGCAAGAGCTATGCAGGCCTGCTGCAAGTAGAATT  
CTCCAGTATTATTTATATCTCTCAAACAGAATAAAAAATCTATAATGAAGT  
TTTTAAAAAGAAGTAAAAATAATCCAAATATCACCACCTTAAATATTCAT  
GTTTTCCCTTCATGTGGTTCTTCCACTTCTTGTCCAAATATGCTTTAAT  
TAATTCATAAAAGTACAAATTTACTTTTAATTAATTCATAAAATTCATAT  
TTAAGTTCCTATACTGTTGGCCACGTCTATCATTTTTACTTCTATGTCC  
TATTCTCTCTCTCTTTTTTAAAGATTTTATTTATGTATTCATGAGAGAC  
AGAGAGAGAGAGAGGCAGACATAGGCAGAGGGAGAAGCAGGCTCCATGCA  
GGAAGCCCGATGTGGGACTCAATCCCGGATCCTGGGATCATGCCCTGAGC  
TGAAGGCACTGAGCCACCCAGGCGTCCCGTCCTATTCTCCATAACACAGA  
TCATGATCGATATTTTTGTCTCCAATTTTACAAATAGAGAATTATAGATAT  
GTATAGTATAAGTAACTTCTTCAAGAGTGTGGAGCAAAATCAGGATTTAG  
CAATCAGGATTTAGAATGCAGATATTCTGATCTTACATAGGCTATTCTAA  
CAATAAAGTTCAAAGATACATACGCACATAACCCACAAAATTCTTTTCTG  
ACATTCACAGAGAAGATTAGGAACCTGTGCTTATCCCATTCTAAAATTTA  
TAGAAAAATGCTTAGGGGTTTCTTGAGACATGAAGATAAGAGAAATCAAA  
CAGGACAAGTTTTACTCTCATTTTAAAGCACTTGAGATTCATTTTCAAAA  
CCCCCTTAACTTTCCCAAACACTCACAAAGTAACTTCTTTATAAAGTTA  
ACTTGACTGGTGTCTCCTTACCTGTCCATGTCTGGTATCAAATTTCCAAA  
AACTAATATACTTCATGCTTCTACACACAAGCAAATTCAGACAGAGTA  
GTCAGCGCCACACATGGGGGATGGATTCCCAGCAGGGTGTATGTGTCTT  
GGATTTGTGCTTTTTTTTTTTAATGTGTGGGATTTGGAAAAAGAATGTTG  
AAAATGTCTTTTTCCCCATAACAGTTTAGGATTCTAAGTCATGTAGAACT  
GAGACAGCTATTTGCCATGCAATATAAACACCAGTACCATGGCAGCCCAT  
ACCCTTCGCCAATCGTACTATGCCTTGAAAATCTCATTTGTTTGAGATG  
CTAGTTCAGACTTTTACTATCCTCTGAGACTTTCTTATAAAGAAACACAC  
CCTCAGCTTTCCTAGGTGGTTTAGTAGACTACCTCTGTCCAGGGGAGTTA  
AGCTGCTGAAGAGTTCATTACCAAGGAGGTGAGAGGTCTTTCCAGGTCT  
TTCTGGTTATATATAATCTACTCTCCTCCGAGAATTTCTCTTATAGGAAA  
TTCTATACACATATCAATCAGGCTGTGAAATTCTGAGAACAGCGATCCTA  
TATCATTTCTAATATCCCTTGAACATTACAATGTTCTTTATACAGTTGATA  
TTCCATAACTTCCTAGATTTCACTGAAATATAAAATTTTTCTAGATTTTA  
ATTTGAATATACTCTCTAACATTGTTTTAGATGTTAAGATCATTAGACGT  
CCTCTATTTTACAAATCTGATAGAAAAATGCTTATAAAACAAGAATACTG  
ATTGGGTAAGAATTTATACTAACTTCATTTCTGTAAAAGTCCTTATCAA  
TGCAATGCAAATATCTTAAGGCCAATCATAGCACCAAGAATACTGCCTTA  
AAAGAAATACTTTGTGGTTTGATACCTCAGGAATTTTCCAAAGGGGGGA  
AAAAAAGACTTCACTAAATATATATTCATATGTTAAAAGAAATTTAAAGT  
TATTTGACAAGTTACATGCCACAAACAGTTTTTAAAGGAAAGGAGACCATA  
AAACCAGATACAAATAATACATTGTAATTCCAAAATAGTATTGATGCCCA  
AGAATAGCATTTCTCCTAACAAAATTCCTGAATATGTTCTCCTAGAAACAA  
AATACTAGCACTCAAATATTTTCAGGAAGCAGTATTTACTATAACTTCCT  
ACTGGAGATTACAGCGCACATTATAATATCATAGGCTTTAAGAAGTTTC  
ACTTATTTACTTTGGGATTGCTGATAAATTTTATTTTGTGAGATACTGTG  
AAAAGAGAAGATAGAATCCGTATTCGGGCAGCGTAGTTTCAATTCCTAGT  
TCAGCCACTTATTTGCTTAAGTAACTTAAGCAACTGATTTTATCTTAGA  
ATACCTCAGGTTTCATCATGTGTAAAGTGGAAGCAATCTTTAACTCATGA  
GATGTTATGTTAAAAGTTAAATAAAGTATGATTTAGAAAATTCCTTATA  
AAATGCTTGCCACACATTTGCCAAACAATAGTAGCTGATAGCTTCTATCG  
TTCTGTGTTTTTCTCTTCTCTTCTCCTCCTCCTCCCCTTCCCCTCTT  
CTTCTCCCTCTCCTCTTCTTCTTCTTCCCTTTGGTTATTACCATTATTCCT

CTCAAATGAAAAGTGACACACTTACCATGGTTTAAATGGGTTGTTAGTGAT  
TACTTTAACCAAATTTTGCTTACCACAAGATAACGGTAAATCCCGACTCT  
TACATATATTTTCAGTGAAATTTCTATAAGAGACAAATCCACAAGCCCATTCT  
TCATCCCTTTCCTGACAGCTAACCAATGAATGCAAACCTAACATGAAAGGGAA  
ATCCAGCTATTTTGCAATTACTCTGGCACACCAGCACATATTCTCTCTTG  
ATTAAATGCCTACCTTTAATATAGGTCGTTACCTCTTAATGCCTATATAT  
ATTCTTTTCCTGAAGAATCAGACATTTCTCAGAGGCAGGGGCCATTTCATTC  
ATTCTATGAATGTACCGCATTTGCAAGGTGATATGGATGCACTTATTTGGT  
GTACCAATGGACAGGGTAGGGAGTTCAAAAAACACCTGTGAACAAAATCA  
ACATTCGTAATAATCTTATTTACTGGATTTCGCCATCTACAAAGTTATGCA  
CTAAGGGTTTTCGTTTGTAGTTCCCATGGTGAAAACCAGCAAATGTAGTCC  
AATCTTGTCTATGCACTGGTCTCAAGAATTTTCACCACACCCACAAAAAAA  
GTAACATATGTGAGGTGGTGGATATGTGAATTAGAACGATTATGGTAATCA  
TCTCTATGTATATTTATATATTTATAAATTTCTACATAGTATGTGATATA  
CCTTAAATATATACACTTTTTATTTATCAATCATACTTCAATAAAATTGGA  
AAAACTGGAAAAAGAAGTTAAATAGAAAATGCTATATTATACGGGAGAA  
ACAACATGTACTAATGAGATGAAGAGAAAGGAAAAACAAAGTTATTGATAG  
CTAAAAGAGCAGATGAGACATAATGGAGGAGACTTAATTTTTTTCTTTAG  
AAATAGGATTTGCTTATGAGTGTATTAGGAAGGTGTTATGGCCTGAATT  
GTGTCCCTCAAACCTTCATATATTGAGGTCTCAATCCCTAGTACTTCAGAA  
TGCAACCATGTCTATATATATAAGATCTTTAAGGAGGTGACTGAGGTAAA  
ATGAGGCCTTTAGGGTGGGCCCTAATTCATATATTGAATGGTGTACAAA  
GAGACCATATGAGGACACGGAGAGAAGGCAGCCAGCCATCTTCAAGCCAA  
GGAGAGAGCCAAGGTTTCTTACCAGAAACCAAACCTGATAGCATAAAGAT  
CTTGGACTTCCAGCCTCCAGAACTGTAAGGAGATAAAATTTCTGTTGTTCA  
AGCCACTCAGTCTATGGTATTTTGTTACTGTAGTCCCAGCAAACCTATTGC  
AGAGGGTTTATCAAATGAAGTGCTTATCATGACCAAAAAACACCTAGGAAA  
GAAACCCAAGGAAGTTTGCAAAACAAACAAAACCCACAGTGGCAGAAAT  
ATATTCATATTTACCTGGAGCACTAAGAATATAGCGAGAGATTGGCTAAG  
CTAATACAGCTTGGGTCTAAATGACAAAGCATGTAAATTCAGATTGAGG  
GATATGGACTTTATCCAGTAGACAACAGGGAGCCACTGAAAGCTTTTGAG  
GAATACAGTAACATGATCAGACCTAAGATTTAAGGAACCAATTTAGCCGC  
AGAGCACACGACGATAGTTGGTAATGGGGAAGACAAGGTGAGAAAGCAAA  
TTAGAAAGCTAGAGCAAAAATATAGAAAAGAAGTCAAGGGACTCTGAGTA  
ACCACAAGAATTAACATGAGGAGATAGAGACAAAGAAATATTATAGAAAT  
AGCAGTAATAGAACCTGATGTAAAAAATTCTCAAAACTCTACAATTGGC  
TGAGCTTAACTTTAAAGTATATTGCTTTTTTTTTTCTTTTTGAATTACA  
CAAATCCTTAAACATGAGATTGGTTTCAACCTGTTGTAGTTAAGTCCTC  
TTGTAAGGTCATTACTTGGTGTAATTTCCCTCCTCGATTTGTTTTTTGA  
GAGGGAATAAAAGAGAAAGGGCGCCTGAGTCCTCAATTCCATAGCTCTGA  
ATGCTTTCTCCCTGAAAAGTTAAACATCTGCTTTCTATCAGGCACAGATG  
TGGCTGGGTTCTGCAGCATGGCCTGAGGATGAAATGCAGGAGATGAAGTC  
TAGCATCTCATTATCAGGAGCTTCCCGACAATCTTCCAACCGTGGACAA  
GGTACCTTGAACGACACTTCCCATCCTCCTCCTCTCAATGTGGGCCTGA  
CACTGACTGGGTTCTGAGACTTGGGAGTATTATTCTTGTCCACCTTCCAA  
CTGGTTCCCTTGAGAGATCTCATCACTTTTCAAGCCCTCTCTTCAAACAGA  
GAAGTAAATCTTGAGGGTGGATAAGGAGAAGAATTCTATTTGCAATGCAA  
TCTAAGAGCATCTCTAGCTAGCCACTTATTCCAAGAGTGATTAGTATAAA  
CTTGTTGTGCAAAATAAAAGGATAAATACAAGAGAGAAAAAATAAACTCT  
AATGGGAAATGCAGTATCATTAAGAGAATTTTATTTACTTTCTCAGCAGC  
AATGAGCAGCCACAAAGTTGAAAGGTCATTTAATGTCTGCCATTCACATA  
AAATATTTCAAGAGGAGAGGAATATTGACCCATTAACAATGAACCATTG  
GGACAGACAACACTACTTCCATCCCTCACAAACCTAAAGAATCACTCCATA  
TTCCACTCTTCAACAGGAAATTTGGGAGAAAAACACATTTCCCTGAAACC  
TCTTGGCCAAGCAACTGATTACTTAACCAATTAAATCTGCAAATATTTAT  
TGAATGCCTAATATGAGATCTTTTAGCTGGTAAAGATGCAGTGGAGAATA  
AAATAGATAAAAAACCCAGCCATCTTGGCACTTATGTTTCAGAGGGTAAC  
ACAAAAAGGAAACATAAAATATATTGTATGTTAAATAGTAGCAAGAGATA

TATTAATAATCATAATAATAAGCAGGCTAGGGTTAGGGAGCATTGAGG  
GAAGAAGTTGCATTTTTATATAGGGTATTAGAAGAGAAAGGTGTAAATGA  
TCAAGCAAAACAAGTATCTTGGAGAAGAATATTCCAAGGAGATGCAGGAG  
CAAAGGTAAAAGCCAAGAGGATGCCTGGGGGGGCTTATGGAACAGCGAAA  
AAAAGTGCAGCTGGAGCCCACTGAAAGAGAGGTTGAAAAGTGTGTGATAA  
AGTGCTGAGAGACCAGATTACGAGGATATTGTCAGACATTGAGCTTTTAT  
ACTGAAGGAGATGGAGAGCCTTCATGCAAACACACCGGTCGCATAATATC  
ACTGATGTTTTAACAGGATTGGCTGCTTGCTGTGCTGAAGATAGACTGAG  
GATAAATTAATATTGGCAAAAATCTCTTAAAATTCATGACAGTTATATAA  
GGCAGATGCACCAACAGCAAGGCAAAAGAAAAAGGACTTGGAGTACGTAC  
AAAACCCATTTTGAGTCAAAGTGTAAGTGTAAAGGCAATCTGTGCAGAAA  
TTTCTCTCAAAGTATAACTCTCAAAAATCTGAAAATGAAACCTATTACTGCA  
CTTGAACATTTCTTACTACTCCATTTCTACGTTTCAGTGAGCCCCATTCT  
GCTCTTCTCTCTCTTTAACGAGTAAATCCTTTACTTCTCTTTTCATTTTGC  
TTAGCTTTTGGGAAAGAAGTTTGCATTTTTTTGAAAGTCAATAGCCTTATAT  
ATATTTTTTTCCATAGTAAATGCTGAGTAACAGATTTTCAGAACATCTGGGC  
AACTCTGATCATACTATGATTTTCATATCCCAGAGGCTTGTGGTGATTAGG  
GAAGGCAGAGGGAAAGTGGTGTGTCCCAAGTACATGGGCAATACCTAATC  
TTGAAGAAAAAAATGTTCTATCATTACATAGAACATCTGGTGGGATTCA  
AGTTTAAAGTTACAAATGGTTTTTGAAGGCCGATTATTAGACAAATGACGTC  
CACTGAAACCAGGCTATGGTTTTTCATTACCTGGTAAAAATTTTACCGATTGC  
TCTGAAATTTACTTATCATGGGATCCTTAATATGTATTACATTACACTGA  
ACAAAAAGAGCAAACAGTGGTTTTCTTGTTTAGAGTGAAATGGAAGCACAA  
AGTGTAGGAGAAATGATAGAAAGAAGATAATTACTTCTTATATCTATGTT  
GATCTCCTATTAAGAAAACGTCATGTGTCATATTTGAAACTCAAGTAGCT  
GACCGATAGTAATAACAACAGTGATAGTAATAGCTATTATTTATTGTGCC  
AAGCATGTTACAAGCACTAGCTCATTATTCCTTAGGCACTACATTAGACA  
CATTTATCAATTCAGTAAACTGAAGCTGCGAAGTTTAGGAAACTTGCTGG  
GGCTCAAACAAACCAAACCTGGTTCCAAAATTCAAAGGAAGATATCCCA  
ACCCAGAGCTGCCACTTTAAACTCTATGTTGTGCTGAATTAATTGCATTT  
CACTGCAACATGCATATCTCTACATGCTCCTCAGTAATCCCAAGTATGAT  
AGCATATTTGTAACCTCATGAATTTACTCCTCTCAGTCTTCAGATTACAT  
TTCTCGCGTTCCCAAGCTGGAGCTCAGTATAAGCAACTCCCCATTGCCT  
AACCCGGGATGAAAACCTTGAACATGTTGTATGCTCCAGGGACCCCTGAT  
TCAAAGAGATTTTTCAACTACTGAACCAGCCTTTATGAAACAAATGTACA  
TTTACCTAAAAAACTTTAAAGAATAGCAACTTATCTCTGCCAGTCACTT  
ATATTTTGTGAGTGTGGAGCATATACCCCAAATGAACAGAAAACATGGGA  
ATACAGATATTTCTTTGCATTCTTTTTCATAATGACTATTACCTTCAA  
GAGGCCATGAATTCATGACAGGATAAAGGACATTAACAATAATTCTTCTA  
TTTCTTGCTATGTGTAGATATGAATTCATTGGTGCAGTATATTGAATATT  
AATGACTTCTAAAATATGTTAGATTCTATTGTTTCATGTCATCAGATAGG  
CATCAGAGCAAAGGCCAAAACACTTTTCTTATTGGTATCTGGGACCCCTT  
AAGAAGTAATAACAACCTTTCTTTCTTTCTTTCTTTCTTTCTTTCTTTCTT  
TCTTTCTTTCTTTCTTTCTTTCTTTCTTTCTTTCTTTCTTTCTTTCTTTCTT  
CCTCCACTCCCCCTCGCCTCCCCACTTTCTTTCTTTCTTTCTTTCTTTCTTTCTT  
TCTCAGAAAGTATGGCAAATCAACTCTGACTCAGGAGCCACTGAATAAGA  
GGTCTTATTATTTTCGAGAACTTCACAACATATTTGTCTTTTTTAAAAACA  
TAGAGAGGGCTTGGGATGCCTGGGTAATGCAGTCAGTTGAGCATCTGACT  
CTTGGTTTTTGGCTCAGGTCATGATCTCAAGGGTCCTTAGGTTTCAGAGCCC  
CTTAGGTTCTGCCCCTCAGTACTGAGTCTGCTTGGGATTCTCTCTCCTTCT  
CCTCCTGCCCTCCTGCTTGCTGCTCTCTCTCTCTCTCTCTCTCTCTCTCTCT  
CTCAAATAAATAAATAAATCTTAAAAAAGAGAGCTCTTG  
CAAGGAACATAATAATCACTTCTGAGGGGAAAGTGGACATATTTTACAAT  
TTGCATATTTAGCCAAAATGCTAAGTTTAACTTCTATTCTTTATATTTAC  
TGCTTGTCTGGGGGAATGTCATAATCCTATCTATGTCACATGGCTATTT  
GAAGACTGAGAAGAAGAAATGGATCTGAATTTTGGAACTCTAAAGCTCAT  
TTCAAATGTTAGTTACTATAATAATTTAAGATTTTGACCTCCATTGTTTC  
TTGGAATACATATTTTAAAGGAAGTTTTCTTAAAGTGAGCCATACCTCA

ACACAAAATCTTCAACCAAGTAGAAAGAGCTTAGCTAAAAACTAAACCAC  
ACTCATTTTCTGCTGACATTCACTTTCATGACAATAAGGTTCTCATTTTCTT  
ATCACTATCATGTTGTGTGTGATATTGTGATTTATAAGAAATATATATTT  
GGCCTTTGTCCCTGTTTCCAGCATAAAGCTCCTAAGACCTTGAGATTTCC  
TAAGTGGTAAGGGTAATGAAGGTGTTGTGTTATTCATAGCACCCCCCTTT  
CTACCATACCTGAGTTCATGGGAATGAGGTAACCTCTTGAAAGCTCCTAA  
GGATGAGGGGGAGCTAACCATGATTACAGGGTTGGGACCTTCAGTCCCAT  
ACCCTGGACTCCAGGAAGAGGAGGAGGGCTAGAGGTTGAACCAATCACCA  
ATGGCCAATGATTTTCATCAGTCAAAGCCCCATAAAAAACCAAAATGGGG  
CTCTTGGGTGGCTCAGTCAGCTAAGCATCCAACCTCTGGATTTCAACTCAG  
GCCATTATCTCAGGGTCGTGAGATCAAGCTCCATGTCAGGCTCTGCATTC  
AGCGCGGTCTGCTTGGGTTTTCCCTCTCCCTCTCCCTTTCCCTTCATCCCC  
TAATAAATAAATATATCTTAAAAAAAAGAACTTCCAGAGTTTTTGGGGTT  
AGGGAACACATTCATGTGCTAAAAGGGTGGTGAACCTCCAGTTCTGTGGAG  
ACAGAAACCCTGCGCTCAGGATCCTGCTGGACCCCCACCAATGAACCTCT  
TGATCTGACTGTTTCATCATAATAGTCTTTATAATAAACTAGTAAATTTTT  
CTCTGACTGTTGTGAACTGCTCTAGCAAATTAATCAAATATAAGGAGGGG  
TTTATGGGAACTTCTAGTCAGAAGCACAGGTTATATACAATCTGAACTT  
GAAACTGGCAACTAACTGTGGGCAGTCTTATGGGACTGAGCCCTTACCTG  
TGATACTAATCCAGGTAATAGCAGAATTGAGCTAAACTGTGGGCCACCCA  
CTCAGTACCCTCTGAGAACTGCAGAAGAGCTTGGTGGTGTGGAATAAC  
ACATCATACATGGCATTATCATAATCAAATTTCTTTTTAAGTAATTGTGT  
GTGTTCAGTGTTATTTAATTTGTTCCCTTTCCATTAGAAGTATGCAAATTT  
AAAAAGGAAAACAAATTAGAAACACCAGTACATAAGACATTTAACAACCC  
CAAAAATGAAGAGTGCAAATTAAATAAAAACTAAAAATACTCATTTACAT  
AATATAACTTACACATCCTCCTGATGTTCTATATTGCTAGTGTAGATTTG  
CCCTAGAATCTTTCTTGAATACAATTTAATTATCAAAAACTCTCAAAATA  
GACTTAAAGAAAAATAGAAACATCTTTGCAAGCGAATATTTGCAGTTTCT  
ATAGGACACACAGCTCTTCCCTCGTTTAGCCTCACATAATTTTAGTTTGTA  
TCCATTTACTTAATATCTTGTGAGTTCTGAACTATAGATTTGAAGAAA  
CAATGGTCCCTGCAGCAAATGCTCACAGTCTTCCAAGGTAGACAAATTAG  
GACACAACCCAGCATCTTTAAATATCATAAACTGAGCATGTGCAAAAAGT  
CTGCCTGTATAAGAGCTAATCTGCTTTATACCTTAATATCTTTAATGTGT  
CCATGTCTTTATTAATTATTGTAATGTTTTCAGCATTTTTTCATCTTTTGG  
AAAGACAGTGATAGTTGCATAGCAGCTGGAAACATCCATAATTATAACTC  
TATATAGGGTTTAAAGTTACGCTTACTCATTATTACATTCACATATGGTTA  
TCATTTCCCTTATGAAGTTACTGATATCATTGACTTTGCATGTTATTAAT  
ATGTTTTTTTTTATTGTTATTATCCCATATTTGGGATTTATAGACCTATT  
TATAAACCCTGGCTCCCTCTTTACAAATACTTTTTTTTTTTAAGATTTT  
TATTTATTTATGATAGTCACACAGAGAGAGAGAGAGAGAGAGAGAGGCAG  
AGACATAGGCAGAGGGAGAAGCAGGCTCCATGCACCGGGAGCCCGACGTG  
GGATTCGATCCCGGGTCTCCAGGATCGCGCCCTGGGCCAAAGGCAGGCGC  
TAAACCGCTGCGCCACCCAGGCATGCCTAATATGTTTTTTTTTAATTTTTA  
TTTATTTATGATAGTCACACATAGAGAGAGAGAGAGAGGCAGAGACACAG  
GCAGAGGGAGAAGCAGGCTCCATGCAGGGAGCCCGACGTGGGATTCGATC  
CCGGGTCTCCAGGATCGCACCTTGGGCCAAAGGCAGGCTCTAAACCACTG  
CGCCACCCAGGGATCCCTATTAGTATGGTTAACAGCCTCCGTTATCCCCT  
CTAAAAAGTCAATTTGTCCAATATATACAAAGAAAGAAACATAGATTA  
ATGATTATTAGAAAGTTTAAAGTCATAGTTTCTCTATGTGTAGATCTAGTG  
GAGTCAGGTGTCTTTAAATAAAGGTCACCTCTCCTTGAGCCCCAATTCTT  
CTAATCATCAGAAAGAACATTTACATGGTGACGTTTCATGGTTACCATG  
ACACAACCTTGATTACTGCCCCCTTGAACAGAGCTATGGTACAACACTGAAG  
TTTGTGACACCTAATTGAGAAATAATTTAATGATTCACACACTCACAAAT  
GTCTTTTACCTTTCAAGGTTGCCTAGACCTCCTAGGTAAGTGTACAGGTG  
TGAGGATATTTCAAAGGTAGTGTAAGCAATGGAAAGCAAATCCAAATC  
CAGTTTCCATCTTATCTAAGATACTAAAATCATTCTGTTTTTAGTCACAT  
CAGCGTCACTGAGTAGGAATCATTTCTTTGCCTACGGATGAGCTGGAATC  
TCAGAACTCTGGAGAGCAGGCCATTAACCTCTGGCAAGTGATTCTCATTTGT

TTCTATTCTAACTGTAGAACTAGATACAAATTCTTGAGTTCCATTAGAA  
GCTTTGTGAGCCACCACAGTAACTCAATGTGACAATGCGTTACAAAATT  
TATTCATATGGTGCTTTGTCTTAAAACACAGGGTCATTACTCTGCAAAA  
TTCCAAGAAGTCACTGCATTGATCACAAAATCAAATAGACCTAAACATAC  
TAACACTTTTCCACATGCACTATGCAAGTAGACATGTATGATTTAGCTTG  
GGGCTTCCTATTTTTCTTGGATAGCAGTAGGAACCTAGTTTTTCGGGGGGG  
GGAGGGTTAAAAAGAAGAGGAGCTGCTTCTATTTTTAGTCGTGTTCTTAA  
GTTCTTATTGGTTATAAAAAATCCCAGCCGAATTCCATAAAAAGCATCAT  
TACTTTCTTAACTTGTATGCCACCAGCAACGTAACTATTTTTGGGAGAAG  
AGATTGTGACCATCACACAAGACTCCATAGTTTAACTTCCAATGACCTA  
CTTTTTGTGAACAAAATAACCACAAGCTCTTCTTTTATTATCTGAGAAAC  
AGATTCTTCCAATCAGAATGCCTTAAAATCCCATAAAAATAAAAAATCTAA  
ATTAAACTAGCAAAACAATAAGCTGATAAACTTCATGATTTTTATGTGTGA  
AGAAGTCCTCAGCTCAGGTAGATCCAGGACTGGACAATTCGGTGGATCAA  
AGATGTCATCAAAGACCAGTCACTTTCCATCTTGCTGCTCTGCGATCCTC  
AGCATCCTGGCTTTGTCTCAGCTTGTAGCATTTAGTTTTAGAGTATGGC  
TGCTTTCATAAGCAAACAGGGCAGTGACCAAAATTGGAAAAGGAGGTTTC  
TCTTGCTTATGTCTTCTCTTTATTAGCCACAAAACCTACCTTCAAGCTC  
CTTAGCACACTTCCTCTCATTTTCATATTGGCCATAATTATACTAGATGCC  
CTTGCCATAACAGTTTACAACAAGGGGAAGTGAAAATGTTTTTTGTACTT  
AACAAATATGTCTATGTTATTTTCAGTTTCTTATACAGCTGGTCTACTGCT  
TATATGAATAACAATGAAAGTTACAAAAGGCTGGGGGTAAATGAGAGTA  
AGATTCAGGCTTTGAACTTAAAACCTAAATGGTGATACAGGAAAGAGAGG  
TATTAAAAATATAATTAGTATAGCTCTATCTCTACACACACAAATATTTA  
CATATATGCATTTGTCTATTAAAAATAATTTTTTAAAAGCACAAATAAAA  
TATGCTAAATATTTAACTCGTATAACTACTGGAGCAACTTGAAGTTTAAA  
AACTTTTTTTTTTAAAAAAGCATTTTCCAGGGGATATAATGGCAGGAAA  
GTTGGTTTCCAGTTTTTAAATGTGTTGGGTTTGCTTATGTTTTGTTTTGC  
TTTGTTTTGTTTTGTATTTGGGCCATTTTTATAAGATTTCTTGGGGCACC  
TGGGTGGCTCAGCAGTTAAGTGTCTGTCTTCAGCCTAGGGCATGATCCTG  
GAGACCCAGATCGAGTCCCACATCAGGCTCCCTGCATGGAGCCTGCTTC  
TCCCTCTGCTTCTGCCTGTGTCTCTGCCTCTCTCTCTGTCTCTCATGAAT  
AAATAAATAAATAAAATCTTTAAAAAAAAGATTTCTTGAGATCTTTACT  
ACCTTAACTTCAAAAGACCCAGGAACATGGAAAGTTTCTTGATATCCAA  
GTGCATTATTGTATCTATCCATTACGTCTTCCTTACTGATCTTCATCACA  
CCAATTCAAGCTATTAGAGGGCATTGGGAGCTGCCCTCAAATCACAGGC  
ACTGAAGGCTGGCAAATAGAGAAAGTAAGGGACTGGCTTCTAAAATTAAA  
AGGGAAGATTTATAGCCACTATATCACCAGTCGAACCCAGGGCCAAGTTC  
ATTCAGAATCCAGACTCATTTGTTTGTGGTCACAAAAGAATGAACTGAAG  
ACCACTTTCCCCAGCAGGCTCATCTGCAAGACGCTAGAAGCCCTCGCCAG  
TCCTGTCAAGAATTCTAAGAGGCACCCTCCTTTTTTCCAAAAGCACATCCC  
TAAGCATATCAGAACAATTTTCATGGGCTGCACAAGAACTGCTCTCCTCTG  
CAAGTGAGCTGTCTCACTGTTGATTTCAAGGCACTGATTTTTCTTGTCTC  
AGTGATGGACCTCTGCAGGCCATCCCTCACTTTACCTCCACCTTTGCAAA  
GAATGTCAGTAACTCCTCAAATCCTCCTAACAAAAGTTGATACTTAGTG  
CTCTACATCTGGTTTTTAGCAATTAATCCCAGCTTGACTAGCCTGCAGAAA  
GGCTTTTATCAACCAATTACCAATATCACCAGTATCACAGTCTCTTCCTAC  
AATTCTAAGAAGTTCACATAAACACAAGACAATCAAGTTTATGCTACTT  
ATCCAGCCTAAATCTTTCTCTCTTTTAAAAAGTGAGCAAGAATATTGGTT  
TAAAAGGGCTATAAGGGATCTTTAGTTAGGAAAAGTAAAACATACACATA  
CGCATAACATAAATATAGACGGGAGATAAAATTATCTGTTCCAGTTACT  
AACATAGACTACTTTTTTCACAGGTCAGTGCAGTTTTGTTTTAAAGTAAGT  
GTGGTAGAAAATGAAAAGTCATTATTTGTTAAAGTACTAGAAGCTTTGTT  
GGTGTAATGAAATCTTTGTGTTTGGATATTAGTCAATGGCCTAGTTTCAG  
ACCTTGTTTAGGCTGAAATGATTAGGCCTATAATCCTGTAGGTAAATCCT  
CCAGGATCCCTAGAGGTACTGGGGCCTTTCCAGGAGCACCTGCACAAA  
GGTTGAGGCTTCGTTACAGGCTGCTGAAGCTACTAAACAACCAGTAAATT  
GGCACAGGTCGTGGTCTGCTGTATGTGGAGTGAGAAGCTTGGAGCTTCAA

GGCTTGGTGGGGACAGGCCTCCCTACACTAGGTTCCACAGGGGCTACCCC  
AGAAACCACAGGCCTTATCTCCATATGATCCTGGAGAGACTTAGAACCAA  
ACCCTGAGAAAGACGGGGAGTTGAGAGATGGAGTAGCCACTTGGGAGGGA  
GCCAGTCACATTGGAGTCCTGGTTTTTTAGAGAGATATACATAGGGCAATT  
TAGATACAGCTATTCCAGGAACTAGGAGATGGATTTGATGACCTCTAGA  
GAGCATCCACCCACCCAAAATTCAGGTGATTTCAATAAGTGACTCTTAAA  
TTAAAAACCCTACTTTATTTTGTGAATCTTGGGCTGGGAGTTTTCTCTTC  
ATAATTGGGGGAACAGAACCAAGAACATTATGCATACCTTATATGTTTGC  
AAACACTAAATGGGAATGGATTCTCACCATTTAAGGATAGAAAATTAAAA  
AAAAAAAGGAAAACAACCTGGGACCTAAGGCTAGGGAGATTTTTAAAATAA  
GAGGAAATAAAAACTCATAAAGAATATACTTCTGAAGAAAATACAATTCT  
GAAGACAGAAGATCACTCTTCATAGTATGCAAGAAGTGTCTTATATCAAG  
CAAAGGTTAAAATCCATGAGTAGCAAACAGGCTAATTAATAAAAGATGGA  
ATGAAACAGAGAGACAAAAAGAATAAGCTACAAAGGCAATAAGCTAAAAC  
AAAAATAAAACAAACACATGCATAAAAAAACAGGAGAAAACATGGAGAAATA  
CATAACAATTAAAATTACAATGGCAAAATTAAAATCTTCATGGTAGATTT  
TTAAAAGCAGTAATGGCATGTAAAAAGTTTCACTAACTTCAAACAAACT  
TGAGTGTCTCGCTTCGGCAGCACATATACTAAAATTGGAACAACTTGATA  
AGCTCTTCCACAATGAAGAGGTAAAGGACAAAGGACCAAAATTGATAAGA  
AGACATATGATAAATACAAAAACATAAAAAATCACAATTATTTCCAAGAGTG  
GAAAAAATGAACAATTTCAACCCTAGCAATAAGCAGTAATCAAATCCACA  
ATTAAGGAAAATTTTCTGGAACCTCAAAGCTAAACATCTTAAAATAGAGAT  
TAAACAGATTCATCTGTTTTGAATAATATTAATGGAAAATAAACCCAAAG  
ATGGATAAATTCCAACAAAATTTTGAATTATGAAGAAAAATGTAATTTCA  
CAAAAGATCCTGCTGATAGCAACCGAAACCTCAGATAAGATGCCTAAAAA  
GAAATAAAAATCCTCAAGAAGATGAATATTGCCAAACCATTCCTATTAGG  
AGCTGTCAAGTGTCAAAAGAACCAACATTTCCACTTGTTCTTCTTGAT  
TATACAGATTAGTTATCACATTTTCAGCAAACAACCAATTCCTCTATTTCT  
TCCAATGCTACAGACTTGACATTGGGTCCATGACAAATCTCTCTCCAACC  
ATCCTGAGCTGATAACCAGTCAGATTAGCTGATGGCTAACCTCCAGATAA  
TAGCTCTTCACTTTAGTTTTATTTTATTTGGATTTGGTTTTCATACATCA  
AAACATCACGGATCCAAAGTTTCCCTTGTTGGTCATAGGTCACAAGACCC  
AGGATGCAATGGTGGGATTTTCTCAGACTGTTACGAATTAGCTGGAGAC  
TGGCCACATGTTTAAGAGAAATAAAAACCAGAAAGGGCAGGAATTTCTAT  
TTAGCTTCAGGCAGTGAAGCACTGGATACTTTATATACTATCCCCTATAA  
GAGCTATAGTTTGAAAAATTTCAATCTTTCTGAGAGAAATAGAGTTCAGT  
CTTTTGCAATTCAGTAGGAGAAAGGAAGGATACAATTAGATCATCCAAAA  
TCCATAAGTAGAATTCATCACTAATGTAGAAGATATGTATGTACACAATG  
TATGACAAGAGCTAGGGAAAGAGAAAATTATGGAATAATCAATAATATTA  
AACTTTGTTGAAGACTGAATTATACCAAGAATGATGAAACACAATTAGAA  
CTAGTGATTAGAAAAAAAAAAAAAGAAAAAGAACTAGTAATTAGGACACCA  
TTAATAACCATCTAAATGTGTAGATTTCAAACAAGGGAAGTGTCCACACT  
TGGAGGTAAAGCTATTTTGCAAAAGTATCAGCTACAGACTTCTCTATTAT  
GTGTTTAATACTAATAAGTAGGTGGGATTTAGGGCAGTAGCTTAAGGGGA  
TATTGTAGTAAAAAGTTTCAGGACTGAGCAAACATTTAGCATACGTACAGT  
TAGAGAAGTATTTGGAAAGAAAAAGTTTAAATAATGAAAAGCCTGAATGT  
CAACGAAACACAACATCATATGATTAGTAAAGACATGGACTTGATCAAGA  
CAACAAATGAAGAGTCATGTTTTAGCAAGGAAAAAAAGTATTTAAGATAG  
GGACAAAGTAGAGAACATGAACAAAGATAAAATGTTGAGAACAGAGGAGT  
TGAGGAATATTCCAACAAACTGGCCACAGATCTTTTGCCTTTCATTAACA  
TTGAATATTAATCCATATGCTGAAATTGAAGAGCTTAGGATTAGATAGCA  
ACTTAAAAATACGAAAATGGTTAATCATCACAAAATAGGAGTGCCTAGG  
TGGCTCAATTGGTTAAACATCTGACACAGGATTTTCAGCTTGGGTCATGAT  
CTCAGGATTGTGGGATTGAGCCCCGTGTTACATTCTGTACTCAGCACTGA  
ATCTACTTGTCACTCTCCCTCTGCTTCTCCTCCTCCCCATTCATGCTATC  
TCTGTCTTACTCTACTTCTTAAAATAAACAAATAAAATCTTTTAAAAAAA  
ATCATCACAGAATAAGTTGTCAACTAGATATGAATAATGAGTACTTTATG  
ATTTACCTGGAAGTGTATAGATTTAATCTTCCTTGATCAAATTAACATG

ATTTTCATTACATTGCCCATGGCAAACCACAAAAGCAGGAAGAAAGGGTGT  
GCAGTAGAAGCTGTCTATGGATATGAGATATGGGATCAATAAGGCAATAA  
CATGGGAATCTGTGAAGAAAATTTCCCATGGACTCTGAAGAGAGTCAGAAT  
TTTCATGACATGATGGGCCTCATTATTCCAAAGGAATAATGGATAAAAGG  
ATAAAAGAAGTTCATGGAGCTAGCAGGAAAGAGACATTTAGGAAAGACCT  
TAAGAGACTGGAAAGCATCCTAGAAGCAGCAGGGACAATCAGGGCCCACC  
AAATACCCCCAGGCTCTGTGCATCTCTGAGCTTCCACCACAGCCTTTCCA  
AGGCCAAATGATAAGCTTAATTCAATAGACTTTAAGCAGAAATGAAGTGC  
ATCTCTTAAACCATGAGTCAGTGAAAAGGTCACTGTGTCTCCTCCATCCT  
ATTCTACCCTATTAAACTTTCAAAGCCATATATTGAGTGAATAGCAAT  
GTCACAAGTTAGAAGGAGCCTGGACCCAGATAGAGGCCCTGCTGACCCA  
CGGTGGATTTGTGTGAATGAGAAATTCCACTGAAATCTGTAGTGCTATGC  
CAATGAAATTTAATTACTCTGAAGAAAAATAGAACACCCAGCATGAGGGA  
CGGCATGGAAAATATGAATGGAAAGGAGGTTCATGTCTGAGAGGTGATTT  
TCACATTCTGAGACCTTTTAAAAATGGGGCTGTTCTGATAATGATGAGATC  
TAAGATGTGGCCACACTTGAGGATGGTTCATGGAGAGAAAATACAGAGAT  
CACTGGACCTATGGAAACGAAGAGTGATCCCAGAATGCCATAAAGAAAAG  
AATGACTTTTTTAAAAAAGATGTATTTATTTGAGAGTGTGTGTACAAGTGG  
GAGAAAGGCAGAGAGAGAGAAAAGAGAGAGGGAGAGAGAAATCTAAAGCAAA  
CTCCATGCTCAGGATGGAGCCTGGCAAGGGGCTCAACCCCTCAATCCCAA  
GATCACAGCCTGAGCTGAAACCAACAGTCGGAGACCTAACCAACTGTGCC  
ACCTAGGTGCCCAAGGATTATTTTAAATGGTTATTATTAAGAGCAAGACAG  
ATCTGCTCGGAAGTTATAAAGATAGTCTTCAAGGTTGAAAATGGAGTATC  
AATAATGACAAAATTCTCGAAAAGAAAGAAAGAAAGAAAGAAAGAAAGAA  
GAAAGAAAGAGAGAAAAGGAAGGAAGGAAGAAAGAAAGAAAGAAAGAAAG  
AGAAGAAGAAGAAGAAGAAGAAGAAGAAGAAGAAGAAGAAGAAGAAGAAG  
AGAAGAAGAAGAAGAAGAAGAAGAAGAAGAAGAAGAAGAAGAAGAAGAAG  
AAAAGAAGAAGAAGGAGAAGAAGGAGAAGAAGGAGAAGAAGGAGAAGAAG  
GAGAAGAAGGAGAAGAAGGAGAAGAAGGAGAAGAAGGAGAAGAAGGAGAA  
GAAGGAGAAGAAGAAATGAAGGAAGGAAGGAAGGAAGGAAGGAAGGAAGG  
AAGGAAGGAAGGAAGGAAGGAAGGAAGGAAGGAAGGAAGGAAGGAAGG  
GAGCCTAAATCCAACAACCCCTAGTCTTACCCAGTGAATTCAGGTGGGA  
GAGGAAGGGACAGTAACGGACAGCAATGGAAGAAAGAAACAGAAGCACTA  
GTAGTCTTGGAACCTTTTTAGCATTCTGATGTAAACCAAAGACCTGTGTC  
CCCAGTCTGTATGGATCATGTCCCAGATGGGTTCATGGGTGAATCGGGAAC  
ATCAGTGAGTTAATCCCAATGTCCAAGAAAGACTTACACAGCTCTGAAAA  
TTGCTATACTAACTGGCTCCCTCCAGACCCATCTTTGCTTTTTTTAAAC  
ATAACTACTTAGGATACTAAATTGTATTCTCATCTCTATTTCTAGAGAAG  
ACCTTTTTACTTACCTTGTGCAGCCCTAATTGTCTGAACTACCTGGCCAT  
GCTTTGTGAATGTTTTAATGTTTTGTAAGAAGTTAGCAGCATTCCAACGA  
AAAAGAAAGAAAAAATAAAGTACACTCTCAAATAGCATACATAGTAACGT  
ATTCCTAAGTTTTCCCCCTCAATCAGAAACCTATTCTTCATTGGGAAGG  
TCCCATTCACCCTAATGCAATTTAGTCAGTGAATAAACAAAGAGGAGAGC  
CGGCAAACTAAATGTTTAAACAGAGATTCTTACCCTGAAGTCTGTAAA  
CCATTTAAAATTGGCTCAGGACTCTGAGAATTGGTACTCCTCACTCCATC  
TCCAGTCAGGACTCCTATAGTTCTGAGAGTTAAAGGGGCCTGTGGTCTAA  
AAATAGTTAAAAATAACTTGTCTCCCAAAACAGCACAGGTGATGATAACT  
AAAAAAAAAAAAAAAAAAAAAAAAATGTTGAATAAAAAATATCTAAGATGTA  
GTTGATCATCTATCTCTCTATTTCCCAAAGTAAACACAAATACTTCATTA  
ATAATAAAGTAAGAAGCCACAAAGAATTGGGTTGAGATTCTCCTTGCAG  
GTGTAGCCAGCCCCCTGCCAAACTTCAGTCTCTGTTTCATAAATTCTTTGA  
TGCTTAGGGATCTGTTGTTGTCTGGAATATCTTTCTCCATCCTCATCAT  
CTCTCTGATTACTCCTCCGACTGAGGGAAATTTTGTAGTATAAAGGATAA  
ATGTTATAAACCTGACAAAGTAAAAATACTATAGACCACAAAAATGAGG  
AGGCAGCAAAATAGTGGGAGAAAGTGTGAGAATGTTAATTTCTCATATT  
TTATAGCAATCAATTAACCTTCAAAAAATTTTTTAAAGAGTATAGATTT  
AAACTCTGGGTTATTTTCATTGTCAATTTTTTTTTTCTTAATCTTAGAGCAA  
TGGTTCACAATCTTGGGTACCAACTAGAATCATTTTCAGAGCTTTAAGAAA

CACTAACACTTGAGTCCCATCCCTTGAGACTCTAATTTAATTGCTCTTAG  
GTCTTTTCGATTTTTTACAGGCTTTTCAGCTGATGCCAGTGTGTAGGCAAA  
GTTGAAAGCTTCTGCCATAGAGAAGTGCTCTAAGAACTCATCCCCTAGT  
GTTTATGAAATATTTATCTGGAGCTTGGAAATCATTGAGCTTTACTTCAG  
TTTTTCTACTACTAAATTTAAGGAAAATTAAAGGTAATTCATGAAAATGC  
CTTCTACATAGTTAGATTCCCTGCTTTCTTGTATCCATATATTATGCATCC  
ACCCATCTCTGTATGTGTCAGTAGAGAGAATTGTCAGGAGTGTATGTGAA  
ATGGTTAATACTGGATTAGGGGAAATTGTGGTTTTTGTCTGTTTGACTTC  
TCTTTTTGTTTGGAATTTGTATCATAAACATGAGTCATATTTTTTTTAAAA  
AACATAAAATAATTACTCATAGGAATAAATTGTTTAAATAAATCTTAAT  
AAAATTTAAAGCAGTTAGGCAAAATAAAAATGCCAAATTTAAACTGGAGAT  
TCCATGCATATTTCTAGTTTCATAGGACAGCTGATTTAATTCTTGAAAGTG  
GAAATGGAAATCCGGGCCTGTCAGGACTTATTTTATGGCTGTGGGCAAGT  
CTGTCTCTGTTAACCTTCCACTGGAGGGTGAGGGTGACGGGACAAATATT  
AAGTTTAATCTGCCAGAGAATGAATAATGTTTATTTTCACATATACGGAC  
TGAATATCTCAGAGTACTAATTTAAACAACAACAAAAATAGGGTTTTATA  
ATTTCTACAAGACAATCTAGAGAAGATGTGTCTATCTGCCTGGAGAAAGAA  
GGCTGTCGTTGTCTAGGTTAATGTTAAAGTTTGTCTTGAAATAACTGAT  
TTGTCCCTACTACCCTTTCCCCAAGTTTAAATTTGGTGTACCCTTCTGGA  
AAGAAAAATAAATCCATCTCCCAGCACTGACCTATATAAATCTAAGTCAA  
ATATACATACATACATATACACAGATATATTTACATATCTATGTATATTT  
ACATATCCATATATATTTATTTACATTATGCCCAAGCAAATATATGGAGT  
TGTGAATAAAGAGAATATCCAGGGATATGTGAGGGATACTGGTTCAAAGA  
GGACATACAGTGGAGAGATTATTTAACAAGCTAAAAATCAGGAGTTTTAA  
TTTCAGTTCTACTGACATTTTGAGCCAAATAACTCTTTGCTGTGGAGACT  
GTCTGTGCACTGTAGGATGTAGAGCAGCATTCTCTGGCTTTAACCATT  
GATGCCAATAGCAACCTCTCCCACCCCCAAACATACGGTTGTGACAACCA  
AAGAAATGTCACAGACGTTTTTCGAATGTACCCTAGGGAGCAAATTGCTC  
TCTATTGAGAACTTTTCAGTTAAATTTCTAATATTAAAAATCTTAAAAGGT  
ACAGTGTGGGTGCTAGGGAGTTGGGAAAACCTAAAAATAGGCTTTCCAGAA  
TCAAAATAGGCTTTCCATTTTGTGATGGGAGCCTGGCTGACTCAGTGGAGC  
ATGCAATTCCTGGTCTTGGGGTTGTGAGTTCAAACCCCACTGGGTATA  
GAGATTACTTAAATTTTTTCTTTTTTAATTAATAAAAAAATACACACAAA  
GTACAGCTTGTGATAAATTTAAGAATTTTTTTTAAGAATTTTTTTAATTT  
GAGAAATTTTATTTATCTTTACATTTTGTCTCTTGTGATAAAGCTCTCA  
ATACCCTCTGATTCTCATGTGGTATATGGTGAATATATATATGTATATAT  
ATACATACACACGTATATATTTCTCTCATGTATATATTTCTCTCTATATA  
TATAAACTATGGAGAGAGATTTTTAAATTTTAATAAATAAATAAGTAA  
ATAATTTTATTAAAGAAATTTTAAATAATTTTAATAAAATTTGATAAAAT  
TTTAATAATTTTAATAAATAAATAATTTTAATAAGCAAATTTTAATAAAT  
ATATAGAGAGATTTTTAAATTTTTTTAATTTAAGAAATTTTATTTATC  
TTTCACATTTTGTCTCTTGTGATAAAGCTCTCAATACCCTCTGATTCTCA  
TGTGGTATATGGTGAATATATATATATATATATATATACACACACACATA  
TATATTTCTCTCTTTCTCTCTCTATATAGATAGATATTTCTCTTTCTCTCTC  
TCTTTATATATATATATATATATAGAGAGAGAGAGAAAGACTAAATAG  
GCAAAAATTGGCCAAGGTCCCACCCAGCAAACCTGAGAAACCATGTTGTGA  
AGTTGTCTAAGAAGTGAAGTCTCAAGATTTTACATTCTCTCTATTCCCT  
CTCAGGTAAGAGAATTTGCTATGACTTTGATTCTGAAGGATTAATTGAGC  
CTGGACTTCTAGCTATCTAGTCACTGCTCTAATTCTCTCTCTGAGGGCTC  
TCCTCTTCCTCTCACACAGATGATGTAGAAGTGCTGCCTGAATCTCTTAT  
CCATCCACTTGAGACTGACCATCCAGCCTATGTTCTCTTTCCAGTCCCC  
TCATACTTTCTACAATGAAGGGATTCAAGTTTGAACCTAGCAAGATCAAA  
GATATCCCTGAGATCACACTTTGCAATCCAATTTAGCAGAGTATTGTGAC  
CTGGAATTCAGAAGTGAGCAGAGCCAACAGGGACATAGTACTTTTCCAGT  
CACTGGTGTCTTTCGTACACATACATAGATTAGAAAGCTTGTGGTGAATA  
GCGGCTATGGTTTAGGGCAGAGTTCCGGTATACCTAGGACCCTTGCCAAA  
AGGCCATGTTAATACCATTGTTAAGAACCCCAAAGCAAAAAAAAAAAAAA  
AAAAAGAACCCCAAAGCTTCCGTTTAACCCCTAACATATGGCAAGAGTGA

GTAAC TGT TTT TTT AAA CAATAG GTT GAG ACC ATATT GAC ATATTT ACT AA  
AAA AGA CAAA ACC AAAAAA ACC ATAC CC CAA ATG TTT CAT TGT TCA  
CAT GGT AAC GTG TAC AAA CCTT GAATAC ACT ATATT CTTT CTCT GAG AAA  
TCAC ATAAT CAATTTT CAT GGG AAGA ATG AGG CCA AGA AGCT CAATTT GG  
CACT ATGT CAC ACATCC CTCTTT GTGGG ATCAG TTCGTGGG ACCAAAGAG  
CTCCCC CTGGAG CCAGAG TTGATGCAG CCTGACTTCAGTGATGTAGACAA  
AGCAAGACAAATTCAAGACTAAACTTGCAGACAGTCTTTTCAATAATAA  
TTTGGGCAAAGAAAGGACCAGGCACCTCCTCACAGACATGAAGCATTACT  
CATACCGGTAAGAAGAAAAAGGTAAGCATGCCTGTGGGTAGTGAAGGAT  
GTCTCCA ACTGTCTGCTGGCAGGGAACAGACACAACTAG AAGGCTGAC  
AGGGAGTCTGATCTTTCTCCAGTTCCTCTCAACCTTTACTCCTACTCT  
TTGGTTTCTTTTGCTTCTTTTCCACAAAGACTAAGGTCAAAATCTTGTTT  
TCAGGACCTTTTCCACCTTTTATTCTCTCAATTCTTATTGCATGAAGGT  
TGTGACCACAAACACTACCAAGTACCAAAGGAACTACAAAGATGTATGA  
ATGTTAATCCCTAGCAAAACAATTTATCTGAAACATGTAATTATCTCTTT  
GCCAGACTCCCAAAATTGTTTCTAATTTATTACATTTTCTTTACTCATAA  
TTCATTGCTATCAGTTTCAGAACCTGATTTTTGTTTGTGTTGTTTGTCT  
TCCTTTTGTTCTGTTGACTGCCAATCAGAGGGCAGAAATGTA ACTCAAAGA  
GACTGTACAATGTTCTAATTA AA ACTATAGGATTCACACATTTTCTCCTT  
GCAAAACAAATTAAGGGAACACA ACTCTTTTATAATCACCCACACTGGA  
TTTTTTAAAACCTTTTATTAATTAAGACATGCAAAATGGTGATATAATCAA  
GGTTGAAAGATTTGATCTTGCCAAGAAGACATATTTGTGACACTTGACTC  
TGGA AATTTAACTAAAGAGTCTCTCAAACCCAAGACTGAGGTTACAGG  
AACAGAACCAATGGAATGCTAAAATGAGGCCAACTAGCAACTAGATAT  
CTGAAAAGTAAAGCTGAAA ACTTGCAAATTCACTTCTTG GGTCTGCTCTT  
CTTTCTTTCCATCATCTGCCCCATTAAGGTTTG CATGATTTCCCAATTT  
CAGTCAAGTTAAATGTAAGTTGACACCATCTTGATTACGTGAGGGAGAAG  
GACTAAAAAAGTACTACGTTATGGTGGAATCACCTAGGATTGTCCCTAA  
TTCTTGAAAAGAAAGTCTTTTCTGGAAAACTTTGGGTGACTAACTCAT  
GCTTCATCAACAGAAAAATCTGTCTTTAAGAAAGAAGGTTCAAGCAAGAA  
AGTGAAATGACATACAGATCTGTAGGGTAACTGAAGCTTCTGAGGCTTAT  
AGCTCTTCATACATACTTTCTGATTCCTCTGGTATTTAAGGGAGCTTTAT  
GGGTTTATTTTCCCTCTCTCTGTATCTTCTCTTCTACTGTGTGGA CT  
TAGCCAGACATTAGAAGCCACTTAAATATAATGTGAAAGGACTGTTGC  
AAATCTAAGTCGGCAACTGGAGGAGAATGAAGGGTTAATGTTTAAACAT  
ACCATGGCTTTCAAGGGAAAGGACTGGTTTATCTGTGCATGAGAAGCATC  
ATCTCAGTGGGTATCCTGCAGAGAGCTAAATAGCCACAGAGTACACATGT  
TTAAAAGCTGAGTCTCCTTTTAAATATGCTGGATGCCTATAGTGTTAAAGT  
ATCCATTTCTCTCAACACCATTCACTTTACTTTATGCCTGAACATATAAA  
TGTCATACGGTGTATATACTCAGTGCCCCACCGTG GATGAGAGGATCTGA  
TATGCTACAGGGCCACATGTTGCTATGTTAAATAAAGAAATCACCTTGA  
GGATTAACCATCAACTTCTATAAGTGACCAAGGTAAATGGAAGACTATAT  
TTGTCTCCAGTTTGTTCTTTTG TATGTTTATGGTTCCTTTGTAACAAGC  
ATGGTAAATAAGAAAATGACCTACTCATTGTCTTAAGAAAATTACAGGG  
GAAAATATGCCTAACAGAGCTGATTTACAAATGCACATGAGTCTACCATA  
GAAGGTAGAGCTCTTATAGGCTGTCTGCTGTTGTTCCCTTTTCCCTAACA  
TGATACCTCAGGGTAGCAGTCTCTTTCTTTTCAATTTTAGTGTAAGTTGCTA  
ATGAAAAATAATCTTTTGTTGTTTATGGTTATGTGAAGGTTGATTATGGGA  
AACAGAAGTAGGCAATGGCCAAGGATACTTAGCAAAATCCTCACTTTCTC  
AAATCCCAATAGGCATCATTGACTTCCTTACCCAAATTGTCAGAGCTGGT  
TAAGCATCTTTCTGTAAGACTGTTGCCTCTGGGTCTGGTGCTGGAGCTTG  
AAATTGGGTGGGTAAATTGGGACGGGACAGTGGGTGTAATCAGGGAAGAT  
CAAGGTCAGACGAGAAACCACAAGCATGAACTGGGATCTCATGAGGACAG  
ACTGCAACCCAGGTGAGTTCTTGCTGGCTCTGACCTTGGTGCTGAGGTTA  
TCCCGTAGAAGTCAGGGCCCTTCAATATAATATAGACCTAAACACATAAT  
CTTGGTCTAGGAGTTGGAGAAGCTGAAGGAGGATCCAGGGAAGGTAGAG  
TGGTTTATGTCCCTCTGCTGCTTCATACCAATAAGACAAGTCAGCAAGTG  
AGCGACAACATATATGAACTACAAAATGCTCCAAATCTTGCAAGAATCTC

CCTTGTGATCCACCCCAACCAGAAACATACAGGAAAGTAGGGTTGCCAGA  
TAAATAACAGACACCCAGTTAAATTCAAATTTTCAGATAAGCAACGGACTT  
TTTTTTGGTATAAGTGTGTCTCAAATATTGCATGGGACACTTTCATGCCT  
ATCTAAATAGATAAATAGATGCATTGTTTTATATAAAATTCAAATGTAAC  
GAGTGCTCTGTATTTTTTATTTGCTTAATCTGGCTTTCCTAAAAGAAAAAG  
AATTCTGAGAAATGTAGTTCAACCTGGCCAAGGTAATACATTTCAAACAC  
ATTATATCATGAATTATGAGATTTATAAACTGAGATTATATTGGCCACAG  
GTGCTCTCAACTCTGGATCATTAGCTCTGCCAGGAATATAAGGTAAAT  
ACAACAAAACATGTCTGGCTATGTCTCTTTTCAAAGGAGATGTTGTGCCC  
CACGCTGGTGAGCACAAGTCACAGTAAACATGAGTCACATGCTCAGTTTA  
AGTTCTCATAAATCCAGAAAGCTTTCTCCTTGAAAGACTGATCTTCACCC  
AGGAAACACACAATTACCAGGGGAGCTTTTTTAAAAGTGTAGATGTCTGGA  
CCTGACCCCTAATATCTAATGAATGAGAATCTTTGGGGTTGAGAATAAAG  
CCTGTGGTGGTGTGTTTTTTTTTTTTTTTTTTTTTCAAGTCTACCATAG  
GATATCTCAGTGTGCACTTCTCATTAAAGAATCCCTGCCTTAGGAATAACT  
AAAAGTGAATACATGGTGTAATCTTAATAGTTTCATACTAGGTTGCTCCAT  
TACTTATTTCTCCCCAAGCCCCACAGAAAATTCCTGATAATACCAACATTA  
AATACCAACTGATCAGGCATTTATCCTACCTGTACATTGTGCCCTGACTG  
CTGTTAAGTCTGGGTTTTGTGGCTCATGTGTCTAATCATTTACCACGTAC  
AAGGGTATATCTCTGCCATCACCTTTATCACTATGTTACTATAGCTCTTG  
GCCTGTTACTCTCTTCCTGCGTAGCTCCTTGAAGCTGGAAGCCATTGCAG  
GACTCTTTCCCGTCTCTCTGACAGCACACAGAAGTCATGTGACACATCAA  
AAGTATCTATTGTACATTGAATGAATCAAAAATGTATGCCCATTCCTCTG  
CTGCTCCTTACTTTGGCCTTTTGTAGTCTTTATTTCAGAAATCAGAAAGT  
AATACTGAGTGCCCATTTATAGACCAGGCTCTGTTGTAAATTCCTTATATT  
ACTAACTAAATGTCCAAAACATTTTTATGAGATATATGGCTGAGAAAACA  
GACGCATACAAAGATTAAAGTGCTGGCTCTTCATCACATGGCTAATAGTG  
AATGATTTGGGACTGAGTCCAGATGCCTTCTCTGAACTTCCAGGCTAAAG  
TGGTCCCTGGAGAGCTCTATACAGGACAGCCTTGCAATTAGGTCACATTC  
TAAAGACTTTGGTAAGAGTGAATCTCTTAGAATAAAACTTGAACTATTT  
TTTTTTATTTTTTTTATTTATTTTTTATTTATGATAGTCACAGAGAGAGA  
GAGAGGCACAGAGACACAGGCAGAGGGAGAAGCAGGCTCCATGCACCGGG  
AGCCCGATGTGGGATTTCGATCCCGGGTCTCCAGGATCACGCCCTGGGGCA  
AAGGCAGGCGCCAAACCGCTGCGCCACCCAGGGATCCCAAACTTGAAAC  
TATTAATGACATTTCGACTTTCTCCCCCTGCCTGTACGCTATTCTCCCAGG  
AAGCTACGTCCAACAGTATGTTGTGGAAGAAGGAAAAAGGTCTAAAATTC  
ACATCTCATAGAGTGAGTCATAAATCAAAGATTTGGCTCGTATAGTCCAA  
CTGCATCAATGTACAGAAAGATAACATGATTCATCTGAGATCACATGGTC  
AGAGGGAGGCAGATCTGGAATTAGGACCTATTAGTTCCAATTTGCAGTCA  
GGTGCTTGTACCCCTTTATTCATATCCTTCACTGAGGGTTGGCAACCCCT  
CCACGTGATACCTTGGTCACAGTTTAGCTTCAGAACACACAAGGAAGAGT  
GCCACACCTCCTCAAAAAAAGCACCCCTCCCTCAAAGTGCCTTACTCTTCC  
TCCCTGAAATGACTCTTTTGGCTCTCTAGAACCTACAGTCTCAGAGGGTA  
AGGATAAGTGCCCCAACCATCAGACTGGACAAGACTGATACAGAGAGGAA  
ACTTTTAGGAACAGGATGCAAGAGGCTCCCCACACCTTTGCCCATAAGGA  
GAGAAATGGGCAGCCATGTCATTACAGCTTTTGTAAATCTTCCCAGGAAC  
ATCAACACGGTGTCCCTGGCCTGACACATATAACCAGGGAACCTTCACAA  
GACAGGGACTTCAGGCCATCCCAGACCCAGGAATCAAGACATATTTCAGA  
GGTTGTGCCTTGGAATTTCTTTACTAAGTGTGTCCCTCCTTTTATTCA  
AAAAAAGTAATAGCTGCACAAAGACAAGTTTCAGAGATGGGAACCTGCAAAA  
CAGAAAACATAGACATAAAAAACCAAACAGTGAGATAGGATAGGGAAAGAG  
GCTGTTTTAAGCAGATAAGCAAAAGGATTCCCTGCCATAAATAAATTAAAG  
AACATTAAACACATACATGCCCTTTAAAGAGCTAAAATGATCAGAGTGCA  
TTTATTTTCTCAGTGTTATTTAGCCAGGTTGGAACAAAACCCCTGAAAT  
TAATGCCAAGATAACAGAGATGGGAGTAGAACTTTCCCTCTAATAATTA  
TCTTGCTATCTGTCCATCTTAGGTCAACAAACATGCTATGATTGACAGGT  
TAAATGTTTTAGGTTAGTCTGAGCTCACATAAACCATTTTAGGTTTTCTA  
GGACGGGAGAATGTTATAAAACAAACATATAATCTACCCCTCCATCTTCCT

ACTTTCAAATCTTCTTCCACCTGCCCTCCTGTCTTTTGAGGGAGTATGT  
CCACAAAGCATTTTCAGTCATCACCATGCTGGCGAGCACAAGTCATGGTGG  
GACCTAACAAAATACAGAATTTTCCTAAATAAAAGTGGAGGAAGTGCCCA  
AGGAAACCTAGTTGGCTTCCATGTATATGACAGAAGAAAAAAGTAAGTGA  
ATTCAAATAATTATCACTGTTACTTCTTTGAACACTCTTACAAATTCTGG  
GTCTCCCAGATGTCTTGACCCTTTGTTATACAGAATCAGGGTGATGAGGA  
GATAATTGAGAGGAACCCAGACCTGCTGCTTAATTCACAGTGGGAAGAGA  
AAAGAATCACTTAAAAAAAAAAAAAAAAAAAAAAAAACAGACTCCATCTGG  
AGGGTCACAAGAAGGCAGAGAGGTAAAAAAAAAAAAAAAAAAAAAAAAAGA  
GAGAGAGAGAAAGAGAGAGAGAAGCTTTAGGGAAATTAGGGAAATTTCTT  
TTGAAAATGTGAAAGGGAATCTGGTTGGTGGGCAGAGAGTATCTGTGAGG  
TAAAGAGTGAGACATCTTAGAAAGTCCTGGTGTGTGCCGTTAAGTGGAAT  
ATAAGTATACCTATTTTTTTATAGATATATAAAGGTAAAGATATATATAGG  
TAAAGTCAAAAATGTCTTTCCAATGAACATTGCTTTTAGACTGGTGTTTA  
TTTGAAATGGGGCCCTGTGTGGAAACAGAATGGGAGGCACCCAGATTTGTG  
TGGATTAAATATTTTGTGGTCTGCTTCAAATGCCCCCTTAGCTTTTTATG  
TATGCCCCCTTGCCCTCAATGACACCCTTTTATGAGGAAAAATAATTCA  
TTGTGAGAATGATTACAAGTAGATTGCATGAAGACTCCAATAGCAAATAA  
TTTAAAATTTAAAAAGTATATTGTATAATATGTCATTTGGGAGTAGGTGA  
TATTA AAAACATACTAAATCAAAAAGGAGTTTAAGAACTGTCAAGAGTA  
GGGATAGTGTTTCATAATTTAAATAGGACAGTCAGGACCTCATTAATTTGA  
AGGAGTAGAGGTATGATCCACGTGAGTTGAGTATCTGGACAGAAAACAT  
TCTAGGCAAGAAGTGCAAAGACCCTGAGCATGAGCCTGCCAGGCATTCTT  
GATGAACCTACAATTTATAGAATATTTTATAATATTCAGTTTCATTTCTT  
CATGTAGTCCCAAATAGGATAAGAATGTCAACTTCACAGAACCTTTTTAA  
ATACTTACAAATAATTTATAAAAAGTGCATGGGGATCCCTGGGTGGCGCA  
GCGGTTTAGCACCTGCCTTTGGCCCAGGGCGCCATCCTGGAGACCCGGGA  
TCGAATCCCACATCGGGCTCCCGGTGCATGGAGCCTGCTTCTCCCTCTGC  
CTGTGTCTCTACCTCTCTCTCTCTCTCTCTCTCTCTGTGACTATCA  
TAAATAAATAAATATTTTTTTTTTAAAAAGTGCTTGGCGTTTTAATAACT  
GATAGGAGAAATCAAATAACATTCTTCTTGCCATAGTGCTGCCTTCTCAA  
ATCTGGGAGATCACAAAGAGAACAGGCTATAGGATAATCTAGCCTAATGAC  
AAAAAGTAATGGATCTAAATTCAAATCCCAATTCCATTGTTTACCAGATG  
CATAAACTTGGATAAATTATTCAACGTCTCTAGGTCTTTGCTTCATAATT  
TGTA AAATTGACATAATAATATCTGTCTTTCAGTGGTGATATGAGCATT  
CACAAAACAATGAGAATAATAAAAACAATAATAGTTAGCAGGTATACTGT  
ACTCACCACATGCCAGGCACAGTGTAAGTTGTTTCCCTGCATCAGTTCA  
TTCTATCATCATAAGATCGGGAAATCGTATCACTAAACTCATTTTATAGA  
TGAAGAGACCAAGGTCTCAATAAAGTGCCCATGGGTCCATAAGTAGTCAA  
CTGTGGAGTCAGGATGTGAATCCAGCAGTCTAAAGACAGTCTGTGCTGGC  
TACCATACTCTATTTTTTTTAAAAAAAAAAATTATTTATTTATTTTCAGAG  
AGAGGGTCAGAGAGAGCTCACATGCCACGCCTGTAAGCAAGGGGGAGGG  
GGGCAGAGGAGAGTATCCTCAAGGGGACTCCCTGCTGAGCTTGGAGCCCT  
AGCAATGCTCTGAGCTGCCTCCCAGGACCCAGGGAGCAGGACCTGTGCTG  
AAACCAAAAGTCAGATGCTTAACCAACTGAGCCACCCAGGCGCCCCACCA  
CCACCACCATTGTAAATCCTCTCATGCTATGCCTGGCACCTAATTAAT  
GCTCAATAAATGGCAGATGTTATTGTTGTTGATGTTATTATTACCAACAT  
CATCATTTACGCCATTTAGAAGGAGTGATTCCCTTTGGAAGGGAACAAAGCA  
CAAATTTAAAATAATACTGCTGGCAGGGTTAGAGACAAATGCACCCATTA  
CTAGCAATATAACAATTA AAAAATGTGTCAATTCAGACCCCTCGTTTGCAATA  
ATTAAAGGAATGAATCAGAGATGTGTCAATGGGCTAAAAACCAGGGAAGAC  
AAACAGCTTTTACTCCAGTCCCAGATATTCTACAACCTGGGAGCACCAAGTC  
TTGGAAGAATGCACTGAGTTTTCTTTTCGATGTGGCTTAAGTCTTGTTTTT  
CTCAACACCCCCAATAAGCATGTAAACAGAGTATTGTTAGACTGCCTAGG  
AGTCTCCCTGGGATTGGGAATAAAAGTAACCCATCACCACCACATACAC  
ACGCACATACACATATCACGTGCTTGCAGCCGGTCTTCCCTTTTCATTGCT  
CAAGTAAGTTTGTACAGACAGCTTTTTTTTTTTTTTAAAGATTTTTATTTA  
TTTGAGACACAGCAAGAGGGAAAGAGTGAGGGGGGGGCACACGGGGAGAG

GGAGAAGCAGACTCCCCGCTGAGCAGGGAGCCTCACACACCGCTGGATCC  
CAGAACCTTGAGATCATGACTTGAGCCAAAGGCAGATGCTTAACCGACTG  
AGCCACCGAAGTGCCCCACATACAGATGGTTTTCTGAACTGATTTCTTTT  
TAAATAATTCACACTACAAAGTTGGTTCTTCTCTTCCCTTGCCGCCCTAA  
CCAGGACTGCTTCTGTACGCTTCTTAGTCACTTTTATCCCAAGTAGATC  
TTACCTATGTAACACACACATGCACATACACTTGCATAAACTTATGTTTA  
TTCTGGTAAACTGCTACTCCTTCAGGAGATCAAGAACCCATATTTTCAGC  
TTTATACAAACATATCATCCTAGCACTTAAAAAATCATCAGTTCCCCCA  
AAAGGAAGAGAATAAGTGACTCTCCTTATAGATGAAGTTAATTTTGTAGC  
AATACCTTAAATATATAAGTAAATCTGGTACCATAACAACGAATTTCCCTA  
GTAAGAAAAATCTTGGGACGCCCTGGGTAGCTCAGGCTGCTTGAGATTCTC  
TCTCCCGTGTTGCTTCTCTCCTGACTCTCATATACTCTGTCTCTCTAAAT  
AAATAAATAAACAAAATCTTTAAATAAACAAAGTCGTTTCTTATAACTAG  
AAAGCAAGTCTCTTATTTTCAACTTATCTTCAAGTATCTCTGCATCCCCA  
TGTTCTTAATCAGGAAGAGAACCAAGAGAAGATTAAGGCTTCCTAAGTCT  
AGCGCAAACCTAAAGCATTTTAGGGACGAGCAGACCTCAGGTGAAAACAG  
CGTAGATGTGTCAATTGGACTCAGGCTCAGTATGCTGTTTAAAGCAGCTGCT  
CAAAAATCACTGAATGCCAGTCAAGAGGGCTCGATCTCTGTTGCTTCCT  
CTTTTGTAGGCAGACACTGACATTTATTTTCAGTCTCCCCTAGTCCCTCCT  
CCCACCCAACGTCTGCAAGTTTTTTGTGAGCAAGTTAATAAAGAGTTAACC  
AGTTATCAAAGCAAATGCAATGAGTGCTCTTCAATCTAGGACCTTTACTC  
AAATAAGATTTTCTTTCTCCAAAGTGGAGTTTCTGCCAACTTTCTTTTT  
CCCCTCATTTCCCTCAGACTTCAGGAAGGTGAGAAATGGAAGGAAAAGTA  
GTAGCAAAGTATTTAACAGTGTCAGAAGTCAAGACACATTACCCCTTCAT  
CATCCCAAGGCTTTCTAAATGGAGTCTCTGCTGCCCCGAACGTGTGCTCT  
CACCCGTCTCCGTTCTGTTCTTGTGCTGAGTGTACTGAGCAAAGCAGTGAG  
CTGTGGTTTTCTTAGCCACGCCAAGGCAAGCAAGCTGGATGGCACCGGGA  
GTGCTGAAAGGCCCTGGGTCACTTCATGGTATGCAATGAATCAGGAACT  
CATGAAAGTATTGATTACATTCGGGACATATTAATAATGTATAAGTAATC  
TCTGTTGTGCTTTTCATGTCCAATTTTTTAACATGCATACGTCTCTGTGT  
TTGTAACCTATGTGAGATCAGGATATTCAGGTGAATGTTAATCTACGACA  
ACTAAGTTTGAGAAGTCTTATGTTTGGAGTCAATCCTACTTATAAGCTCC  
TTTCTCATTTAGAAGAATATCTTCCAAAAAATATGTTTGTTTTTATCTC  
TTACCTTTTTGTTTTTGTCTGCAACTACGATATTGCATAGTGTGTGTGTGT  
GTTTGTGTGTGTGTGTGTGAGTGCTAAAAGGAAGCATAACCAAACATATA  
TGGTACAAGGCATGGAGCTAGAGATTCATTGTGACAGTCAATTTTATGTG  
TCAACTTGCGTGATCCACGAGGTACCCAGATATTTGGTCAAACACTATTC  
TGGGTGTGTCTGTGAGTTTGTTTTTGGATGAGATCAACATTTAAATTGGT  
AGACTGTATAATGCAGATTATTCTACTAATGGTCCTCATCCAGTCAGAAG  
AGGGCCTGTATAGAACAAAGCTAGCCTTCCTTCTTACCTTCTGCCTGACT  
AGTTGGGCTGAGATACCATTTCATTCCAACCTTTAGACTCAACTGAAATA  
CTGACTCATCTTGGATCTCTAGCCTGTGAGCGTTCAGACTAAAACATCAT  
TTGGCTCTCCCGAACCTCCAGCTTACCAGATGCAAATCTTGGGACTCATA  
AACCTCCAATAATCTCATGAACATAATCCAACAATTCTAGTACATACAC  
ATATTGGCTCATGTTTCTCTGGAGAGCCCTGGCAAGTACACTCAGGTTCT  
AGTCAAGTAACGTGACAGGATTGTGGGTGATTCAAGTGACCTCTCTCAAGCTC  
CTTTTCCCCTTCTGTTCTATGGAGGGAAAAAATTATCAAATGCCTCCCAA  
TCCTAGGGAAATGATAAAAAAATATAAATGGCAGGAAGATCCTACAAGTAT  
ACACCATAACATACACCCATCACGAAGAAATCGGTTTTTATGGTTTTATCT  
AGCAGAACCAACCAATCTTTCAGCTGTGACTGAAAATGGAAGACTTCCCT  
CTCCATCATTAATGTAGAGCTGTTTGTGCTGACTTTAGCCATTGAAATCTTT  
CTTATTCTTCTTAAAAACCAGCCCTTTGATGGAAGAGATGGGAAAGTCA  
TTTGTAACATATTCTGACAGCAAGTAAAACATAGGTGCTTAGCATAAAA  
TAATTGAATGTAGAGCTGTCTCCATTCAAGAGAAAAATGGGACCTAAGATA  
TTTCTGGAGGACAGACCCTCTTTTAATGTTGTACTCTCAACTCTTAAATG  
ATTACAAAATGGGGCATAATTTTCCAGTCTAAGTAAAGTCTCCATTTACT  
AATTCAAATTTCTAGTGAACATAAAATTAAGCTCAACGTTTTGAATACCA  
TTCACATTAGATTTGAGTTACACAACCTACACATCCATGCCACATCTTACC

CTAATGCAATACTTGGTCTGGTTAATAATTTCCCCTTTATAACTATTTGT  
ATAAGCGAATGAGTGGCTGGAGAGCAATATTATGTGTCTGTGGAGAGTAT  
AGACTTTGAGCCAAATGGACCAGGGTCTTGCCTTCAGAAATTGCTTAATG  
TATGACATTGAGAGTATTACTCATCCTCTTCAAGACTCAGTCTTTTTTATT  
TACCAAATGATCAGTAACAGTCCTTAAGGAGTCAATGTCCCGCATGCTAT  
GCACTTAGCAATATTCTTGGCAACACATAATAAGGCTTCAATAAACATCA  
GCACTGATTATTAGGATGACAATATATAAATTAATCAAAGGTAAGTAACA  
CTGTTCTAGACTCTACCTACACTCCTACTGAAGGAGAAAACCTAACCCCT  
TCTCAACTTGGTGTCTTTCTCTTCCAACCAAAGGAATGAGAAAAGAGAA  
AGGAAGGCAAGAGAAAAAATGGAAGAAATGCTAGAAACTGTATTTTTAGT  
TAGAAATATTAGCACTTTGCTTGCTTGTTTTTTTTTTAACATAACATTACT  
ATTCAACAAAAAAGCAAGAGTTTCCATTATGAATATGCTATATTTTTCTGA  
GTGCTACTCTTCCCCATGATTCTGACTCAGAGTTTACTGCCATTTCCCAA  
ATAGGTGCCAGAAAAGCATTCTAAAAGTTACATTTTATCATATCATCTC  
ATCTGCTCAAATCCCCTGATGGCCTCATACCCAATTTAGAGTAAATCCCA  
AAGTCCCTCAGCTTCCTCACTGTGCTCCCAGCGTACCTTTGCTCTGACTCT  
TCCCTTTGCCGAATGTTCTTCCCCTAGAAGATCATAGATAGTCCTTTTAC  
CTTCACCTCCCTCCCAAGTCTCTGCTCAAAAGTCCCATCGTCAGAAACCT  
CTTCCCAAGTCTGACTACCCATCAGCTTCTATTCTATTACCCAGTGTCTAT  
ATTTACCATTTGCTCTTATTGCCACTGTATGTATGGAACATGTTTATTTG  
GTTCAATTACTTCTTGCCCCCTTTCCCACCCAATGCCCTAGAGTGTGAGCT  
CTGTGAGAGCAGAGACAGCACACGGTTTAGTGTGAGACATGCAATGTCTC  
AACAAATGACTGCTACATAACTAGCATTCAAACATACTGTTGATGATATA  
AATGAATAAGACTAAGGAAGAAAAAGACTGAGGTAGACAGCATGGGAAGG  
AAAGAGAGAGAGGGAAAGTCATTCATGACTAGAGCAACAGTTTATTGAAA  
AGGATTTACCTGGTAAAATATACTGGCCATTTTGTCTTAAAATGAAGAA  
AAATCAGAGACCCCTGGGTGGCTCAGTGGTTGAGCGTCTGCCTTCAGCTC  
AGGTGATGATCCTGGGGTCCAGGGATCGAGTCCACATCGGGCTCCCCAC  
AGTGAGCCTGCTTGTCCCTCTGCCTATGTATCTGTCTCTCTCTGTGTC  
TCTCATAAATAAATAACAATCTTTAAAAAATAAATAAATAAATAATTGAA  
AAAGGAAGAAAAAATAATCACAATAAACTTAAGGAGAGCAGGCAGGGTGG  
CTAATGAAACGGGTAGAAGAAAAAGAAGAGGAGGAATGATAATGAATGTA  
TGTTGTCTTATCTCCTTCTTTGCTCTGATTTTGAGATAGAAGGTAACAGT  
GTGCTAGGAGTCCAGAACTTATCATGACATCACGAAATAATGTTCCAGAG  
AGCAACTCAGTTTTTCTTATCCTAGAGATAGTATGACAAGATGGAAGTGG  
TAAATGAGGAGAAATAGATTTGGCATTTCCTTATAGATTTAAGTGACTTT  
AACTTTTCTAGAACAACTCTGTGGCAGGCACAATGCTAAGTGATTGTAT  
ATGCATTTCCTTATTAGTTTTCACAACGGCAGTCTGAAAAAGATACTAT  
AATAACTATGTATTTTGAAGAACCCAAAGCTCCGAGGAATAAGTGATTTA  
TCTCAGGGTCACATTGCTGTTTAAAGCGGCAGAGTGTGGGGCCAGACTCA  
TAGCTTTTCTGCTACTTCTGCGAGCCTCAAATGGATATAGCACATGTTA  
CTTCTTAGACAACATGTCCAGGAGCCCTAGACATTACAAACAAATTGCA  
AGGTGCCCCAATCCCCAGAAGCTTACAAGAGACAAAATATAGCTTCTTCT  
ACCTTAGCATCCTCTAAAGAAACACGTAGCCAACCAAACAACCCAAAAAA  
TCTGTTGGCTACTTTGAGGGTCTTCTCAGCCTTTAGGCTAGATCAGAATT  
CCTCTAATTGGCCACTTCTCTCCATTCTCTCGAGAGATCCAAATTGGAT  
TAATATCTTATCTGATCTGTAAATGCTTTTCCGTCTTTGTGAGCAAACCT  
ATCTGGGTTTTTCCCAGCTTAAAGGCTGCCAATCTCTTGGTGAAGTCAAAG  
TAGTAATTTTCTTATTCTGTTACTAGCTCCACTGGGTAAATTCAGATTAG  
GAAAAATTATACCTTGTTTTTAAAGACCTCTGATTTTACAGGGACCATT  
GTTAGGCTAGTTTTCAGGAGTTCTGTCTTTGAGGTGATGAAATACAGTAG  
CTACAGAGGTGGAAGCGATGATTAGAAGAGAAAACTGAGACCTCCCTCC  
TCTTCTCCACATTAATATCTCCAAAGATCTTAGAGCCCTTGCCAGAAAT  
GTGAGTGAGCCTTACATGGGTTTTTCAAATCAGGTTCAATGTTTGCTTAA  
GTTACATGGCAATCTTATCAATTTGACTCCATACGCCCATTTGGAGTCCAG  
CTTGATTTTAGGTTTTCTAAAGTCGACTTGGTAATTTCTAATAGATGTCAA  
ATATTACAAAGGTTTCAGATGTGGAGCCAAACATATTTGGGCTGCAAGTTT  
TTGGAAAGCTGGAAGTGAAGTCTCTTGGAGGCTTTCCAGTAGGGATGGGCT

AGTGCTTCTTTGCCAAGGTTAGAACCGAATCCAAATCTAAGAGGTTTAGA  
ACTCAGGCTTGGCTGGAATTTTCTGGAAGTTGAGGGGGAATTGTTTTATT  
TTCTCTAATTTAGCAAAAGTCTTCTTAGCTTTCAGAATTATGTCCCAAG  
GGAAGTGTGTATAGATATTCAGTGGCTCTGAGGAAAGCTCCCTTAAGTGA  
CTTAATGTGCTTTTTAATGTTTTTATGTTTTTAGATCCTAAGCAGCCAAAC  
ACATCTGCATGTCTATTTTTTCATTGTCTTAATGTGATTGACAGAGTCCT  
ATTTATTAAAGAAAACATCACCATAACATGCTGTAGGAAATAATTTCTC  
CCCCTACTAAAGTTAAAGGTAAATCACTCCTCCAGGACCAATGGTTTGTG  
ACCAAGGTTAATACATACAATAAAGCAAAAGTTGTTTCGTTGGCTCCAGGG  
AAATTATACAAATATCATTTTGTCTAGGCCCAATCTCCCCCTGTTTATG  
GAGAAGATGTCATAGCTGGGGCTAAGCCCATTAATGGAATGAATGAGTGG  
TAGAAAGCAAGGAGTGGCCCCCTATAGACTGGACAGGACCTGTGTAGGAAA  
GGGAGAGGGCCTGGAATCAGGGGACCCAGATTAAATTCTAGTTCTCCACT  
GAATCGTCCTGATGTACCATTTGCAAGTTATTTAACCACTGATCCTGCTC  
GTAAAACAGTATCTGCAGTTTTTACCTTGAGGGAAAAATGATATATATGAA  
AGTACTACATAATGTAAACACACAAACAGACAAAATTCTGGGAACTGTAA  
AAAAGTGCTCATTCTGAATTTTTGTAATCTGCATCCATTTTAGAGAATATG  
AAATAGGATCTGCTTAGACAACTCAATGTCATTATAGTCCTTTCTCATGA  
TGCAATTTTTTAGCGAACAGAATTACTGACAACTATGGAAAGCTTAAAAAA  
AAAAAAAATCTCCTTCCCAAAATGGAAGTCTCTGAGTTTCCCCCACTAAAA  
AGATCTCCTCTAAAACAAAGAGTCTGGAAAAGACCACTGATGATGACTGC  
CCCAGACTGGCAATGAGCAAGGCCCTCACTCTTCTTGTTCGGGACCAATTA  
AATATTCATGTAGTCCCAACTTTGAAGGGATTTAGCCCCAGCATTTCTATA  
AACTGAAGCAATCCATCATCTCAAAGGGCAAAGAGGGCAAATTTTCTGAG  
CACTTTTCCTCAAACCTCCATCAGAGAATATAAGCTCACGTTACTTCCCCT  
CCCCAATCCTTTCTTCTTTATGAAGTGAGACTATTGTGGGCAACCGTGG  
TCTTGTAATGCATTTTTTGGCGGGCCAAGGCAATACCATGGCTTCAGATAT  
TCTCTTTAGTAGAAATTGGCCAGGGTTCTATTGTTTGCATCTGGGACATG  
GCCAGTAGAGTTCGGACATCTGCCCACTGTGTTAGCTCCTTGGGCGCCAG  
TGGGCTGAAGCTCATTATTCCGCTGGGAATTATGCCTCTATTCCTTGAAA  
AAGGGAGTGACTCACCAACAGCCCCTCTATCACATCTGACATTTGGAAGAC  
GAAAAATCCCTTTTGAATTCCAAGTTCAATTGTGAGTGAGTTTCTTACTCT  
GACCAAGTTGATCCATGAAGGTATTGCCTGACCAATCTTGTGCTTGGTCA  
TCTCACTGGAGTTGCTATTTAGTAGGAAATACAGGAATTCATTTCTAGA  
CATGCTTAGGATTATGCCAATCCAAATGGTCAGCCCTCTTTGGCTGCAAA  
ATCAGAAGATAAAGAAGAGAAAAACAGTTGTTACAAGAGGCAGTGGGGTAA  
TGCTGGCATGGTATAAGAAGTTGGCAGATTTCTCAGTCCTCTCAATAATT  
TTGCTCTTTTCTGTCCCTTTCTTTTAATCTTATTTCAACCAATTTCTAA  
CCCTTTGATAATTTTCAGTAAACATCCCTATTCTAGTTCCTATTTCTGTC  
ATTAGCTAATTGTGGCACACTGGAAAAGTTAGTTAACCTAAGGCTCAATA  
TCCATGCCTCAAAAATGAGGAATATATCAGTGTTTACAGGATGGCAAAGC  
TTAAAGTGCTCAGTACAAGAGCCACCTAATAAGTGCTCAGTAAATGTTAG  
AGCGAAAATGACGATGATGAAGCTTATAAACAGCTTTTAGCACAGTATTT  
AGCATGTAACAATGACTGGATCAGTGATGAGAAGTATTCACATTATTGCA  
TTACTATTTGTTCTAAGTAAAGGATGAGAAGAATCCAGTTGGCTTCTTTG  
TTCAAGTCCATTTATAGACTATTCCCCACTGGGGTCAACACATGGCTTTT  
GCCAGACCTGAAACTGAGGCTTGATCTTGAAATGCCATCACATCTGCTAT  
TCTGAGACCTTGTCTCCCTAGTACCTACCTACCAACATTTTAGTTCTTTAA  
GGGTTCCAATCTGGCCTAACAATAGCCAATAACTTCCAGGAAAACAAAG  
AGCAGGATATTGAGGTCTTTTGGCCTTTGCAACAAAGAACAGCTGGATCC  
AATTCAAAGCCTTAAGTGAAGAAAGAATAATGGACAGCCTTCCACT  
GGTCATGTGTGAGCCACTACAGGCTGTCTCTCTACCACCTGCAGGAACAA  
ATTCAAATGGAGCATTTTTTATTAAGGAAAATCTTCCACCAGATTATAAGC  
AGTGACCCACTGAGAAATCAACCCGGTAGAGAATTGGTGGACAATACCAT  
CCTAAGATGTTGCAGCAAAGAGTGGCCTTTGGAGTGGAGAGTTCTAGGTT  
CAAAGCTTGACTGCCTCTTTAGGTAGCTTTATTTATTCTTTCTGACCTTC  
AGTTTCCTCACTTTACACAAAAAGGAGATTATAATAATAACATAACACTT  
ATGTGAGAGAGCTGCTCCAAGATTTAAACAGGATCCTATTTGCTGTAGCA

CATGGCACAACCTGCAGTAAGTAGTAAGGGTTCAAGGTAAGTCAACGTGG  
GTTAGTTCCTTCTCTTTCTCAAAGCTTTCCTGAATGTGTCATGAGTAC  
AATGGTGGTAAATATATGGTGGATACTCTGTAAATGGCACTTCCCCACAA  
AGCAGTGAGGAATCTTGAGACCTATGCTCCTGAGAGTGGCACTCTAATGC  
CGAGCGCCAGTGGGTAGCTGGAACAGTAAGACAGCATCAGATCTGAGC  
TTCTCAAAGCCCATTGTTCTCCTCCTTTGAGGCTGCAAATTATTGCCATCG  
CCTGCTTATTATTACTTCAACTCGTCCCTCCTCTTCCACATTTCAATAGC  
TCGCCTGCCTGCCCTTGGGCGTCTCGGGGAAGCCCTTTCCACACCCTCTA  
GGGAGTCTGCAATACAGCCCAGATGCTCTCAAAGATTAGAAATACTTTTA  
AGTTTAATCTAAAAAATAGTCCTATCCTTTGTCTCAGGCCATTATTTCT  
ACTCTTACCAATTTGGGGAGGATGCAATTTCCCATTCTTCATTTATAATA  
TTTTGTTCAAGGTCTTTGTAGATTGTGTCAGTCTATATATCAAGTCTCCTGC  
TTGATTACACCATATAAAATTTAGTTCTATTTATAAGTTAAAGCACAACTA  
CTAATATAAGAATTAATAACATTTTCAGTTTGGGAGGCCAACTCATTTTT  
CTAACTCACCATCTCTCTGGATGAAACATTAGCCTCAATCTATACGTTAG  
AATTTTAGTGCTCCAGAAATCACCTCATTTTGGAGGCCAAAAAGGCAAAT  
AACTTGCTTCCAATGATATTTTCTTGCTAACAGCAGAATCAGATCTCACA  
CATAGGTGGCCTGGTTCTCAGGTCAGGCGTCTCTTCGCTGTCCAGTAATA  
CCAGATCTGGAAGGGTCACTCAAAGTTTAAACTCCTCTGCCTCCTATGCA  
AGTTCTTTGGGTATATGGGATCCTGCTGAGATCTCCTACATTCCCTGCACT  
CTGTTCAGTTTATTGTCCATGGACCACTTCCCATTCCCTCCAACATGTCC  
AGGGGACTTTTTCCCACTCTCAGGGGCGACCTGCCTCACCTGTCTACCTG  
GGAAATCAACGCAACCTTACACTTCTCTTCTGCAACTCGCCCCAACATCC  
TCAGAAAAATCCATTTCTGCACTTGTGTGCTAATAGAATTTTGCATTTGT  
CTCATTTGTAGAGGACACTGCATTGAATTATAGTTCTTTATCTTTGCCTC  
TCTATTTTATGATTTGTTATTTTGTGAGTTGTTCAAACCTTAGCAATTAT  
ACTTTATTCATCTGCGTGTCAACAGCTCTCCAAAAGTTTCTGACACATA  
ATAAGCCTTAATAACTACAATCTTTTTGTTTGTGTTTCATTTTTATTTTGT  
TTTGTTTGCAGACAATAATTTTCATGTTAGTTGCTTTAAGTGAACAATAA  
TGCACTTACATGGAGTATAACTATTCTATTCTGACCAACATCTAAATAAG  
TCTGAACCTCTGTGGATATCTAGGATTTCTAGGAACATAAGTACTAAAA  
ATAGTAATAATAATTGAAAACTTTGCCTGGAGAATTGAGTAACTTTGTA  
CAAAGAACTGAGAGAAGGTTTACAAAATCAGAGCACCAAAATAGAATATC  
CAAGGGCTTCCACCTTATGTTTTAAGGTAGCTTCATTTGCCAATCTTAAA  
AAAGTCCAGAATTTTCTCTTTGACAAAAAGCAAAACAAACAAGCAAAAAA  
CCACTTAAGTGGATATATACACCAAAGTTTAAATATCAAGAGATCAAAAT  
TAAATTGTAGCAAAATAAAAACTTGCAGTTACAGAAAGTAGATAAAACTC  
TATAGTAACTTAAAGTAGAGTCTTTTATCCCAAAATGGCAATGAAGTCTC  
CAACTATAATTAAAATACCTTAATAACACTTAGAGTAGAATTCTTTAAAA  
AATAATCTGAACCTCTGAAGTATGTTCCCATCCTTGGGAGTTATCATGGAA  
TTTCTCAACTCTGTAAATTATTCAGTTCTTTAGCAGAAATACATGAGTAT  
CGCACACTTAGCGTGTGGCTTAGAAGCTGTGAAACACTAATGTTGAGTGA  
CCAAGACCGCCCTCTACTAAATACTACTTCTACAGGCAAATTCTTACTTA  
AGAGACCCTGTGGGGAGTCAGTCCACCACAACCCCATACCCCTCTCTTG  
TTCCCTGGAACATAAAGAGCTATGACTTAGGTGGATTCAGTTTCCAATGT  
AGCTTGCCCTGGGATTATACAGATTGATATTCTGAGCCATGTTTGGTTA  
TTCTTGGCACAGACAACCACATTTTCTACCAATCAGGTTACGATGTGCT  
ATAATGGGAAGTCATAATATATTTAACAAGCTGAAAACCTGAGAAAAGAA  
AAGAAAAAGTTCTAATGCATGAAATACATATAATTCTATAGTAATAAAGG  
AAGTAATACAGGCTCAGGTATGTTTTTGTCTTAAGAACTTAGCACAAAC  
ACCATTCAACACAAATTAAGGATAAAGCAGCTAGTGTGAGAAGCTACA  
AAAGGTAAGTTATTTAACAATAATGCCACTGTTTAGATTCTTAAAGATC  
TGTGTGAACCTTATCTTACCTTAGAGACTGAGGAGAAGGAAGAGAAATATC  
GGCTCAAGTAAAGAATGCCCCACAGATCACAGTAATGACTCTCTCAGCTG  
GAAACAGAAATAAAGTCATATCGATGGTGTTAGTGTTAGATGATGCATG  
TGTGTTTGTCCAACTCTATGTAGAATTTCAAATGGCTTGATCCTGATCA  
CCAATTCCTGGCCAGAAACACACTTCCATTCAAACACAACCTAATTTTTTT  
TTTCTTTTTTCTTACAGCATCTCCTCTAGATTTATGAAAAAGAAATCTTTT

ATTTTGGTTTTGTTCTCTTCTCTTCTTTGTATTTGGAATAATTATAAGTC  
ACGTAAATAATGACCTGTATTGGCTACTGGGCCCAGTGGAGAGATGAAAG  
GACAAAACAAAGGGAACATGTTAACATGACTCTTGAAAGAGCACTGTTG  
AAATGCATGGCTTAGCATCTGATGGAACTGAACCTTAGCTCTTCACTTG  
ACTTGTATGCCCCAGTGTAAGATGAGAATTATGAAAATCAGTATTTCA  
GTTTATGGTAGCTAGCTCACTGCCTGACAGATGGTGGGCATAGACACATA  
ACATTTTGTATTCTGCTTTCACATACTTGTCCATGAATACATTATTTTTC  
TTTTATGTATGTAAACACTTTTGTGTGTATGTATATATACTTGCTATTAT  
ATACAACAGTTACTATTAAGCAATGAGATAGTGCAAATCAGGAAATAAGC  
AGAAAACAACATTCAAATGAGGTTCTTCTTTTTTCTGTAAGCTATAATTCTG  
GGGGTGGTGGGAATATTCAATCCAACAAAAACATTCTAAGTAGTTGACA  
AGATGGACCAAGTTCCCTTGACAGTCCTAATGAATGTGTGTTGTCTCAG  
TGTACTTATTAATAGCTCCCTCTTTCTAAGGAGTTCCCTAGACTTGATCA  
ATTAAATGTTACACATTGGGCTCCTGGGTGGCTCAGTCTGCCTTTAGCT  
CAAGTCATGATCCCAGGGTCTTGAGTCCGAGTCCCACATTGGGCTCCCTG  
CTCAGCGGGGAGCCTGCTTCCCCATTTCCCTCTGCTGCTCCCCCTCCTTG  
GGCTCTCTTGTCTCTCTCTCTCTCTCTCTCTCTTTCAAATAAAGCCT  
TTAAAAAACAAAGTGCTCACACACCAGTGGCCAAATGACATATGGTTT  
TAAGGGCACTTGATCCAGAGAAAAGCTTCCCAGGGTAGGTAAGATCCAG  
GGTGATGAGGGGACATGGTTGTGTAAAGAATGAGGTAGAAAAATGGTACA  
GACCACTGATTTCAAGGGGATAGAACAGTGATTACAGAGATAAAAGCACA  
GGCATCTATGAAGAATTGGAGAAAAATGAGGGATCATGTAGTTCAAAGGA  
GAAAACTGCAAGGATGACACTAGATAGATCAGTAGTTATCAGCTCATCA  
GGGTGAGGACATTTTGGACCAATCTATTTTAAGAGCACCCCAAAGGAAGA  
ACAGTGTTCTGTTTACTTGAATGAGAGGATGTGCCATGAACATGGGGAGT  
TATGGGCACAGAAAATAAAGAGCCTGTTTTATTTGGAAGCCCTTGAGAA  
CTGTTTAGATTACAACAAAGTAGTATCACTTTGTTTGTGGCCTCCTTTCT  
CCCGACGGCCGATGGGATCTGGCTAAGAACCCCAAAGCATGCAGCATCCA  
TTTCGCCGCTGAGTTTACATTTACGACAGAACAAATCCAGAATGAATCATT  
GCATGCACAGGTTGTTGGTTATGCCCAGTTTGAAGCCCATTTTCAAAGCT  
CTTTTCTACTCTGTGTTCAAGGCTAAGTTTGCAGAGATTTATGTGGAGAT  
TTCTTGTTCTTCTTGAAAAATATAAAATCTTTCACCAGAGTATTTTTCTC  
ACTCAGTGAGGCAGTGCCGGCCTCCTTGTTGTTATTCTCCATAAGATCT  
TTTCAACTTCCACTCAAACTCTTAGCATTTTTTATTTAAGAAAGAAAGGG  
AGCAGTTGAAAACAGAGAAATAGCCCCTGACATGATCTAAATGGGATG  
GGAAGTGAATGCATCCCTTTAAATCAGCAAAATGTAAGAGAGAAACCAG  
TAACTCAAAAGGACAAAACCTGTGTGCCACATAATAGGGAACTGATTTTAG  
GAGGATTCAATTTCTCCAAATCCCCTGCTTCTAAGACCTAGCCTAATGTG  
CAGCAGAGCCTGAGGAGTGTGCAATTGCTTACAGGGCTGACAGTAGCTCA  
ACACTGGGAAATAAACCTGATTAAAGGATGATTTTGATGGAACATGCGTT  
ATATATCCAAGGAGGATAGGGCACTAGGTTTATAGTGAGTGGGTTTCATG  
AGGAAAGGAATCTAGGGAATCAGTAGGTGGTAAACCCAAACCAGGCTCTG  
CCATTTACATGCGGTGTGGCTTGATAAGTGTCTTAAGTTCTCTGAGCCT  
TAGGTTCTTCATCTGTAAAAAGGGGATAATAATAGTACCTACCTCAGGAT  
TGTTATTAGGATGAAATGTGTATATAGTACACGCAGCAATCCCTGACACA  
GAGTAAGTGCTTCTTAACAACAACAGTAATAACAAAAACCCACTAATTAT  
TACTACCCTACTCTAAAAATCTCTGCAAATTTAAAGTTTCTGTTTCTGTGA  
AATGATTTAGTCTCCGGCTATGTTTCCTTCCACCTACTCAAATCTCCCTAA  
AACCAAGAAGAATTTTTAACACTTAGAGCAAAAACCTACCAATTCAAATTT  
TATAAAGGAAAAAATTCACACTATGCTTTTGAAATTTCCGAAGAGACGCT  
CAGCCATACACCAAGTCCCTTAGTGATAAGAACATTGCGCCAGGTGAAGA  
TGGGAAGCTAAGACATGATGGGAGCTAGACAGGGTCAGAGTTTATCTTT  
ATATCTCTTTGTTTCAGTTTATAGAAAAAGAAAGGTCCCAACTTCCAGAC  
AGCCATGAAAACAAAATAAACAGGCATGTAAATGAGATGTGTTTTGGATG  
TGAGTTTGTATATGTTGGCAAGAAGAGCAGTGAACTTTGACTCTACTTT  
CTTATTCTTTTTTCTGTCCCCCTCAGTGCCAGAGGAGTTATTTTTTAAAG  
CATGGGTTTCGTGTTTTTGGATCATAATGTTATGGCAAAAGGGTAGATGACC  
TTTACATTTAGTTAGTAGCTGTTATGCAATCGGCAAGCTCCACATGGCAG

CGCCTTGCGTCTGGTCACCAATAATTTGGGTATTGTACAGTTCTTTTGTT  
TGCCCTCATAATTAACAGAACTTACTAAGCCTCAGCATGGTTTGGTAGT  
AATTTATTAATAATTAATAATTAATAATTAATGTATTTAAAAATAT  
ACATAAAATATATATTCCTCCCAAGTTCAACCCAAGCATCTTGCAAGGC  
CCTGTCTAATATGGATAATACCCAGAGATAAGTAAGCGAGTGTGCTAAAT  
TTTTACCGACACATGCAAGTGTTAACCAAGCTCTGTGCACCAGGACTGAG  
ACAGGACATAATGGCTAGAAGCATTCTAGCAAATCCTACAGAATAAAGA  
CATAACCTATGAAAGCAGACACATGAGATACAATTCACAGAAGACCGGG  
GCTTGTAACCTCAACGGGGTCACATCAACAAGACCAGAAGGGATTGCCATA  
ATTTATATAGTGTCTCATTCCCCACCATTTCATTTTTTATTTTTTCAAT  
TCTTTATTCTGTGGGTGTTAAGTCTGGGACGATTTTCTAGAGAGAAGG  
ATGATAATTTCTGGCAAACAACAACAACAACAACCTACTAATTTGTA  
TGTTTTATGCTAATATTTTTTTTTTCTGGGGAAAGAGGGAAGGAAAA  
AAAAAAACAAATTACGTCTGTGGCCTAATATTTTTTTTCAGACCTCACCTT  
AGAAACCAATGAAAGCATTGTCTATATTATTCAAAAATTTTGACAGAAAA  
CTGAAAAATTTAGTAAATGTTCCAAATAGTTTTCTTTACACAGAATTGAA  
CAACATGGAAAAATCTTAGCATGCCACTAACTGAATTTCTCTATTTTCTT  
TGGATGTTTGGTGATGGATGGTCTAAGACTGCCCATTAATAACAGTCAT  
ATAAAATATGTAGCAGGGAAAAAGAATATGTGCTCATGAAGATTTATCTG  
ATCTTCATCGCTAACTTTTTGTTGTAAAATAAACTTAGCTTTTCAATTCC  
CAGGTCTCTGCTCCCTTGTTGGTATTTTGCGAGGAGAACTGTATCTAACA  
AACTGGTATCAAATTAGATTTGCTCCACCTGAAGAACCAAATAAACTC  
TCGAGGAGAGGGTGGTGGGGATGGGATCTCATCATATTCCTATAGAAACA  
ATAAAATGTAAATTGTGAAAACGGGCAATGTTTAAATGTGCATTTCTTT  
ATTTGCACCAACAAAAGATGCACAGTTTTGAGACCTATGTTAGAACAGT  
TAACACACTAGCCTCTGAGATAAGCAACCTCTGCATAGCAGTGGCTTAGC  
CCAACAAAGATGGATCCGTACACACGCAAAGTCCACTGTTGGTGGCCCT  
GGGCACATCTCCCCAAATGTCTCATGGGTCTGGATGCCCCTGCCCTATG  
GCCCTGCCATCTTGAAGCCCTTTGCTTCTAGCTGCACAGATGGTGTCTC  
CTTCTCCCTCTGCCTGTGACTCTGCCTCTCTCTCTCTCTCTCTCTTTC  
TCTCTTCTCATATGAATAAATAAATAAATCTTAATTTAAAAAAGAAT  
AATTTGCCTTTTTTTTCCCAGCGATCTACAGTCAGAAGTTGGCCAACTG  
GAAGCTGATATCAAAGCCTGATAGGGACTTTTTTTTTTTTTCAAGGACT  
GCTTCTCTAAGCTAGAACTATGTAATGAGGGGTGAATGTGAGGGGGTGT  
GATAAATCTGAAGCCTTTATGGAAGAATTTACCAAAACATTCCAAAGGC  
ACACAGCTCTAAATATAGGATATGGGAATCTTTTTTTTTTTTTTTTTTG  
ATATGGGAATCTTTGACTTCCATCTTCTCCTTGCTATAAAGAAGCAAAT  
TGAAAGTAATTTCAATTACTTTGGGGGGTGCCTAGGTGGCTCAGTCCGTT  
AAGCATCGGACTCTTGGTTTCGGCTCAGGTCATGATCTCAGGTCATGGGA  
TCAAAACCCTGCACATTGGACTCCAAGCTCACTGTGGAATCTGTTTGAGAT  
TCCCTCCCTCCCTCTGCCTCTGCCCTCCGCCTGCTTTCACACTTGCATGC  
ACCGTCTCTCTAAATAAATAAATAAATAAATAAATAAATAAATAAATAA  
ATAAATCTAAAAAAGAGCTGTAGTTGGATGGGTGGGTGAGCACCTCA  
CATTTACAATATTCTATCCTTTAGTTGCATACTTCTTCTTATTTTAGATT  
TTTAAATTTTCTATTAGTTTCTCTAACCTCTGAGCCCATTCTCCACCTAC  
CAATTCACCATAAGCAAGCACACACAAACACTGTCAACGCCCCCTCTTC  
CAGGAAGGAGACACCAAGGTGCAACTAGAAGTGCAAGAGTTTTATTGAAT  
GAAAGACAGAGAGATGAAGCAGAGAAAAGCATTGCCATGCAGCTCTGACA  
CCTAGAAACAGAGCCTCAGCTATGATGCAGATCTAAGCCATCTCAGCCCG  
CCAGTGGAGACTCCTAGAGCAAAGAAATTGAAATTTGGGCCAGAAATG  
GCCCAAATATAGTCCTGTGTGCTTAGGCGTTGGGTGGATGCGGTCCA  
GGAGGCAGGGCTTCCCATGAATGCTAAGATAGATCCCAAAGGCATGTACA  
TACACAGGTGACACCAAATTTGTTTGAATTTATTTATTTTACATTTTAA  
AAGTATTGTTTGAATTTTTTTTAAAGATTTATTTATTTATGAGAGACACGC  
AGAGACATAGGCAGAGGGAGAAGCAGGCTCTTCGAGGAGACCGATGTGG  
GTAGGACTTGAACCCAGATCCTGGGATCACGACCTGAGCCGAAGGCAGCT  
GCCCAACCCTGAGACACCCAGGTATTCCTCAGTTTCGCTTTTGTATCAT  
TTACGCACATACACACTTGCGGAAGTGTCTACATATTTACATAAATTCAT

TCAATAAGAATTTTACTGAGTTCCGACTCTCATCTTCGTACTGTGTTTTT  
TCCCATCAATTTTCATTTACCTCTAATATCTCTAGAGTAAATCTAAGTAGT  
TTTATCAAAAGTCCACACAAATAGTTCATATGTTCTTTATTTTTCACATCT  
GAGAAAATCTTTCTTTTGTGTTTTGCTCATGAATGACAAGATGGCATATTA  
TGGAATCTTTGAATCTTGCTTTTTTACCCTCCACACTGTGGGAATTCCGA  
AATTATCTCTTTTTATTTTTTTTACTTTTTATTTATTTATGATAGTCATAC  
AGAGAGAGAGAGAGAGGAGGAGAGACACAGGAGAGGGAGAAAGCAGGCTCCA  
TGCACCGGGAGTCTGACGTGGGATTCGATCCCGGGTCTCCAGGATCACGC  
CCTGGGCCAAAAGCAGGCGCTATACCGCTGCGCCACCCAGGGATCCCCCG  
AAATTATCTCTTAATGTTAAGTATTACTAAGGAGAAAGAGTTGACTTTTG  
TTCTTTTGATATAACCTAAGTTTTCTGCTTGAATATGTAGAGAAATTGT  
TTTTAAATCCTTGAAATGAAAACATTTTGTGAGTGTACATTTATGTGTGA  
ACCCTATTCTTTTTCAGTATGTTTTTTCAGATTAATCTTACCTGGAAATAAA  
AGAGTCGTTATTTTATAGATTTGGGCCTCCATTTTAAAACAGGAATATTTT  
TTTTACATCTCCAATAATCCAATAATCACTTCTGAACTCGTTACATAGTT  
CTTTTGCCAGATGCAAAAGCACTGGTGCTATTACATTTTTATCTGAAAA  
TAGACTGGACCTAATATCCTTCTGCTTCTCAACGCCAGTTTAAAAGTCCT  
AAGAGCTATTTTGCTAGTCATACTACTAAGCCCTACTTTTACAGCATCGT  
CTTGAAATTTGTACCCCCATTTCTTTACTTCTGTTTCTTACTCAGTCTCA  
AGTACTCCTCTGGGAAGCAAAAAGAGGTCTCTTAATCATCTGTATTTTAT  
TAAGTGTCTAATAGACTATAGGAGAAAGCCAATGGTCTGTTTTCCCAACA  
TTTCAGCTGAGTACCAGAATTTGGAGCCAAATTACAGCAAACCCTTTTCA  
AATGAAAGAAAGAAAGAAAGAAACAAAGAAAGAAAGAAAAACAAAGAGAG  
AAAGAAACCTTAGGAGTTCTATAAGGTCCGAAACAAAGCAAACAACTTA  
GGTATTTAGAGTCTTATCCAAAAGACTTTGTCACTATAAACCAAGAGCAA  
CTCAATGTATCTCAAAAAGATGAAGGGGTAAATCAATGTGGCTGTAATT  
TGAACTTTACAGCTCTAGGGAGTCTCCCCATTTCTAACCTGAGATTTAGA  
CCACTAACTATCTCCCCTAGAGGATTTATTTGCTTCATTTTGTGTTA  
AAAAATGAGTCACTGTAAACCAAACTGTAAAGAACTTTATTTTTTAAAA  
GAGCATTACAACCGCTTGATTGATTTCAGTGGGATGTTGGAACTGTTTTG  
TTCTCTGAAAATTTTGAAGGCTTTTATTCAATTCTGGACAACCAATGGAG  
GACGTTACAAAGGCAGTATCACCTCCAACCTTCTTATCCTGAAAACCCTCA  
CCACTGCTCCTCATCCCTTTCTAAATGGACCCCTCCGGGTGCTCCAAAA  
GGCCTCTAAAAAAGACAGAAACAAAGCTTCACTTACAACGTATCTAA  
TCAGAGTAGAACACAATGAGACCAGTACTTCTTATATTGAGGATAGCACG  
CACTCACTGATTCACTTATTCATCAAGCATTTATTGAGCATTCAATTATTT  
ATTATTGAGCATTATTTGAAACATTCATATGTTTCACTACTCCAAATGCT  
CACAGTACAAAGATGAACAAGACCTAGACCCTGGATGACAATCTAAATAT  
TCTACGATCACAATTATGATAAAGAGGAGGAAGAAGGAAACAGAGGGAGA  
AGGGAGGTCTGTGTGATCCCCATTCGTTTGTGTACTGGCAGGCAAAGAAAT  
ACCCCAAAAAGAAGACACTGGAAACTTGTATAATACATGAATTGGGCC  
CTTCTTATTAAATTGAACAATTTCAAAAAGACATTTTTTGAACACCTGCT  
GCATTTCAAGGCACCGCACTAATGGTACATGGATGAGGAGGTCATTGTCTC  
TTGAACAAGACTGTGAACACCTACGTACAGAGACCGAAATACACAGAAAT  
ATGACACAGTAAGTAGAAAAAGGTATGTGTAGAGAGTTAAGAGAGAAGAGT  
TACTTGTTCGAAGCTGGGCATTCAGAGAAGTCTCCTGGAGGAAACCATTG  
AATTAATCTTGAAGGATCGATAAGAATGAAGGCAAATAAATAATAGATT  
ATTTTAAAAAATAATTTAATTAATTAAGTTTAAAAAAGTGAAAAGGTCAA  
AAATTGGAAAGGATCTTAAGGCAGAGAGAACAGTCACCCAGCCACCATCA  
GACACAGATTTGGCTCCTCTCTGAAGGGAAGTGTGTCCCCCTGCAACAA  
CAGGATTGCATACAGACAGCTGAGATGAACTAGATGGTAAATCTAATT  
AGATGATACATGTTTAAGCTTAAACTGAGCAAGGCCCTAGGCACACCCAG  
ATGACTCCAGTGTGAAGCCAGCTCTTAAAGAAACCATGTTATGGTGGAAG  
TCACTCACTAAATAGAATTTTATTTGATGACTTAAACTGTCTTTCCAACT  
TGGGAGAACACCTCTCTTTATTTTACGCTGTTTCCAGTTTAAACGTATTT  
AAATAGTATATTAAACATGCCTGATGCCTTGCTTCTGTGATCCACCTG  
ACAACCAACAGAAAATATAATCCCATTTGCCAGCTGGTTGCTGTAAATCC  
ATCTATCTGATGTCTTTCCATATCTGTTTTCAGCATCTTTTAAGGGTAGGT

ACACATGTCATTGATGTTTTCACAAATTTTTTTTTTATTTTATTGATGTTTTC  
CAATTTTTTTTTTATTTTTTATTTTCTGTACTCCCTACTTACCAACATTAA  
GTATCACTGATTGTGTAAGTGACTTGGTTTGAAATGATTAGTTCATAAC  
AAGGCTATATTGATCCCTGCCTTGTTTCAAATGCTCACTAATCTCCTAG  
AGGGCAGGGACAGGAGCAACCCTCCACCCCATTTATTTTTCTGGCTTGTTG  
TTTCATGTCACTGCAGTGTCTTTACAACCGTTTTACATCAAGGACAACGT  
TCTTTTGGAAGCACACCATCGGAGTTGGGAAATGAGCAGAACGTGATGAG  
ACGGTGGAGAACTGGGTCTCCGCTGACCTCTGCTTCTGTAAGAACAGCT  
TCCTTTTATCTGCTTCCTAACAGTGGGGTCTACACAACATTTCACTTTT  
TAAATTCTGCTGACCAAAAAACACAAATTCAAACCATAGTCCTAGCC  
CGTGTCTCTCCCAAGCCAACATGCCTGCTTTCGACAAGAGAGCTACCCTT  
GATTGGATTCTTCTGGTGGTGCAATCACTCTGTTAAGTACTTAAACTCTA  
TTTACCTTGGTATGTCTTGGTCTTAAGTTTATCTCTACTGGACTTGACTC  
TTCTCATTCTAATACATTTTATATCCAGTTCTTTATATTTAATGGTTGTA  
GAGAAATGCTCGACCGCATAAAAAATAAGGAACTAATTTAAGAAAGAAAAT  
GTTAAGGTGAATGTCAGCCTGACCTCTGTTGTACCCAGGACTTCTTAAGT  
TTTGGTCTAGCTATGCACCGTTTTTAAATATGCAGTAGTCCATTATATTG  
GTAATTATTTTATACTGAGTAGTTTGTTAAACATGTTGTCATTTTATTTA  
AAGATAAGCCCCAACCTGGGAACGAAGTAGGATTTCTCTTACTCGACCAT  
AGCCATGGGAAGTCTTGCATGCTGAATGGCAAGGTATGACATGTACTGGA  
TAGAAGTATGTCTGTAGTGGCCTGAATACTCAAAGGGAACAAATGACC  
ACTTGACACAGGCCTTGCAAATTGATTGCTCTAGGATAGGAAGAGGCAAA  
AACACATTATGATCTCTGAGCTCCTAAAAACCTCACCTGATCACTGAAAT  
TGTGCTAAAAAAGAAACCATTCCCCTCCCCCCCCAAAAATTATCTATTTCC  
AGACTTCAAAGACTGTCTGTGATTTTACTTAAGAGTGAGACATTTTGGAG  
GGCAGGTTGGACAGAGGATTCAAAGAGCCTGCACCTGATAGGCTACTAGGA  
AGGAAAGTCAGAGACCAAGTCAGGTCTTCAAACCCCTGCTGACTCCTCCC  
ATAGTCGTTGTCCAGCCTAATCCAACGCATCTCATGGGTCCCAGGGAGAA  
TGGAATGCCTTTCCTGGCCCCGTGGCCTCCTCAATCACCACCTGCTACA  
GAACTGAGAGATTATGAAGTCCACCAATTGCAACATTTTTTAAAAATTTCTT  
AGTTCAATTTTGTCTGATCCACCATTAAAGAATACCCTTCTTTTCTTACAAT  
TTTAAAGAAAAAAAATCTCCAGTGGCTCTGATTTTAGGGAGGATTAAAGT  
TGAGATGCCTCGGGGTGAAAAGGTATGCCTACTGTTGACTTCCCAACCT  
ACCTCTTGGTGAAGAGGTTACAAAGATACAGATCTAATTCCAAATCTAAT  
GGGGTGGAGGGTGGGACAGGATCTTTTATGTTTCTGAACATCAACAGCAC  
GAGAAACCATTCAAAGGACATAAAGACAGTGCTAAGGATAAAGCTGCGTT  
TCCTGCCAGAGTTATAAACTGCATGGAAAGACCCTCATTGGGATATGCAT  
GCAGTGACTGGGTCCCAAGAACAGAGCAGGGGAATAACAGGCACCGAGGT  
TTGTTTCTTTCCAGAAAACGGGACACCAGCGGCCTCGAGATATGAGACCC  
TCTGATATTTTATTTTCAGAACAAAGACAGAACCCAACCTGCAGCTCCCTCA  
GGAGAGCCCTACTTCCCAGCACTGGGTCTGCAACAGGAGCCCTGGCATT  
CTCCTTCGCGAGAGGTGCAGCCAGCACACAATCAAGCTGTGATTGGGA  
GCTGAGCGCAGTAGTTAATTAAGGCTGCATCTTTTATTCTCCAGGGCAAT  
TCAGCACAGCTTGAATGCGCCCCAGAGCCAGTCTGTGGTGGGAATGTCTC  
CTAGGCAGTGGGAGAATCCAGTCTCATCAGCATGACAATAGCCCCCAGG  
ATGCACCTGGACTGATGTAATGGCCAGAGTTAGGGGGGTGGGGGTTGAAA  
GCCTTGTAGCAGAAGCCTGGAGCGCTTGCACTGACTGGGGCTATTTTCA  
TGCACGAAATTCCTTCTCTCTTTCTTTCTTCTTCTTCTTCTTCTTCTTCT  
CTAATTGGTAGAGCTCAGAAAACAATATACCATTAAAGAATCCCTTTCTCT  
CTCTCCACCTCCCCCACTCCCACTTTTTTTTAAAAAATCCCCAAATCTTGCC  
TCACTGGAAATCTCCACTTTTTTGTGTTCTGTGGTTTGCAAGAAGTCCTAATT  
TTTCTTTCTTTTGAACATGGAACCTTATAAAACAACGATTTACTAAGAGACC  
CTGCAACCAATTCTTCTGTATCAGGGTTTCCCTAACGGGCTCCCCACCTT  
GTAGAATCTTGGCTGTGGTCTGCTACAACCTCATACGTTTTCTTGTACA  
TGATACATTGTATACAAAACATTTTGGAAAAGTGAGTCATGGAAAGTTAGT  
CTGATTTTGTATTTTTTTTTTCTTTTACCTTTTTTTTTTTTTTTTTTAAATCAC  
GAGAACCTATTTAAAGCTGGAGCAATTGAATCATTTAAGTTGACAGGGTA  
ATGGTTCGAAATGGAGGCAGTGTGAGGAAGTGCCAGTTGAGTCTGGCGAT

GATATTGTTTTGGCTTTGCCACCAACTCAGGAGTGACCCAGGCAAGACCCG  
GTCTCCTCTCCTGCTTGTGTCTCAATTTGCTCATCTGTCCAAGAGGAGG  
GAGGGACTCAGTGATTTCTAAGGCCCTTCTGAGCTAGGTAGGCACTTAA  
TGTGATTGTCACATTTTCTTAATTGACATGGGACATAAGCTCTGACGTGC  
CAGAAAATTTGCAATTGTTCTTTAGGAGAACAAGACATCCTTATTCTATC  
TAGAGCTTTTAAATTAAAGCTCTTAATCATTCTGGACGATATTTCCAGAA  
GAAGCAGACCTCAAAAGACAGCATAACACGGAATCTGACTCACTTGAGAGG  
CTGGCACCTGATGAACAGACATTAGAGCAGCGTTGCTTTACGAGAATGTT  
CTTAACATTCTGAAGTATACAGAATCCTGAGAAGGGGTCAGCTCTGCAGC  
CTGTCTCCATTTTCTATTCTTTCTCATTGTTCCCTTACTTGGCATTGT  
AGAACCCTAGAAAGGATTGGAACATGTCTCTTTAAGCTTTTCCCAAAGTC  
AGATATTTTTTTTTAAAGTGGTCTAGTAGTCTGGATTTATTATTGGAATCA  
CAACCTGTCACTCCAGCTTACTTCTTCATACTCTCATCAGATTATGTGAG  
TTGAGGAGAGTTTGAAATATGGCACCATTCTTTCCCGCAGGACAGATAGC  
ATGTTTGTAGAGATTGGGGTCATCAAGAGATCTGGAGGACTGGAAGGTGG  
TTCTTCAAAGAATCTCTGAGTTCCCTGAAATTGTAAGCATTTTGAATGTG  
TATATGTGTGCATATTACTGGGGAGCAAGTGTATCAGTGGTGGGGGGGCT  
TTCATTCTGCTTACAAAGATGGTAACAGTCATGGTCTTAAGGGAAACAAT  
CTGAAGATTGAAACCTAAAAAGATGGCATGGATTGTGAAGGGAGGGAGAC  
TCCAGGTCTACATGGATGATTATCTCTTCTTTCCGGATGTTAAAATAAAAA  
CTCTGAGGTCAAAAAAAAAAAAAAAAAAACTCTGAGGTCGTTCAAGACAT  
TTCTATAAAATTCCTGCTAATAATCTGTGGAAGTGAATTCAGTTCCTCAT  
CTTATTGCTTTCTGAGATTGAACAAAAGAAAAACAGTAATAAACTCTCAG  
AAGCTTTGGAAACGTACAGCCCCTTAAATAAAACATAACACCCACGCTGC  
AAAAAGCCCAGGCACTGTCACTAAATAATCTCAGTTATGGGGTTATTTT  
AGGTGAACCAGGACTTTGACTCTACTATTCCCCTCTTCTCCCAAAGCAGC  
AAAATTCAGTGGATCTCTACACTCCTTCAGCCAAGATCCTGGTCACTTG  
TTCAAAAAGTATCCAGTTGAAAAGCCTCTTTGAACTTGGTAGGGGTCCAT  
TTTATTATCGTTATTATAAACTTTTGAGAAGAATGTGGCTTGCTTGGTA  
TTTTTCTCAGGCCACGTCTGAAGTTTAAGTAAAGGAATACAATACCAGT  
GTCTTTTTAAAGGTGCCAGATTTATCATCAGCATTTGTCTTGGCAAGGAA  
ACACACACACACTCACACACACACACACGCACACGCACACACGCATAC  
ATCCAGACAGCCATAGTGGTCTTCTCAAAGGGAAAGAGCCTGTCCCAGT  
AGTTTAGACTGTTTGCAGCTGGGAGCATAATATGGTAAAATGAAGACTGC  
ATATCCCCCTCACCTTTCAAGCAGCCAAAGAAATCTTTGTCCAGCCCA  
GGTGTGGCTGTGTCTCTTCACTGACATCCTGTCTTGAATTATTCAGGC  
TCATTCAATTATGTATCCCACACAGACACAATTAAATCCTTAACCTTCCCC  
TCAAGAGAGCAGCAGAGCCCCCAGGGACTGGGGGACAGTAGTGTTCCTCA  
GGGCACAGAGCCGCCTGGTGGAGCTGATGGGAAGGGGAATGGTTTGCCAA  
GAGGCTCTGGGCTGGGGGTGTGCGGGGGCCTCTCTGCTCTGAAAGTCACA  
ACCCCACTGCCAGCCATGTTCTTATTTGACCGCAAAAGCAGCTCCCAT  
GGAGATTTCCAGAGAAGGGGAGCTGAGGAAGTACTGAGCATTTTGAATTC  
AGTTTAGGGGTCTGCATAAATTCCTCGAGGAGCTGCAACCCGCAGACAG  
ACGTTTATCTCTGTGATGAGCCTGCATTTGGTTCCATTAGGTAGGAAGC  
TGTGAATGAACTCCAGATCCCCACCAAGAGACTTGGCTGGGGGGGTGGG  
GGGGTGGGGGGAGAGGTAGGGGAAGGGGAGCCTGCAGAGTCTCAGCCTTG  
TATCTTCTGAAGACCAGCTGAGATAATAACTAAGGATTTTTTAACTCA  
AAAAAGTATGCTTTTATGCTACTGTTCCCTTCTCAGGATCTCAGACAATAG  
CGGGTGGCTTATACAGAAAGAGCTACTGCCAAGATGGTTCAGAGCATCTC  
TAGGAAATGAAATGCTGAAATTATAAACCAGGTAGGTGTGTACTGGGGG  
CAAGAGGGTGAGAGAGGGAATCTTCCTTCCCTTTGCGCATCCTCTTGTC  
TGATTCTTACCCTCGGGGCCTGGAACCCTTAGGTTGAAGACCCACTCT  
GTGTACCAACCAATCACTTATTTGTCCCTGTCCAGCCCTGCTGGGAACT  
GACCAAAGGCAATCTGGTGGCAGTTTATAGATTCTTTGTGGTAGATAATG  
GTAGGTACCAGGAAGTTCAAGTGGGAGAGGTTTAATTATTTTCCCATA  
AACTCACTAACAGTTATAATCAAAGTCTGTGACACCAATCTGTAC  
ACACACACACACACACACACACACACACAGAGAGAGATATTAGTGTAC  
ACAATTGTTGGCAAGTAGCACAAAAAATAGCTCAGAGGACCTGTTCTTTG

AGCTCAGGGACGTCTCAGTGTGATCCTTTAAGAGGATCTGGGTCCACCT  
TCTAGAAAAGATTTACTCAAGATAGACATGACAATGGTCCACTGTCAGAA  
CTCAGTTATCCCTATGGTTGGCCCCATGTCCCTATATCCTCTAAACTAGC  
CTCTTTCTCAATTGAGGCAATTTTGGCCCCACCCCCAGGGGACCTTTGTC  
AATGTCCAGAGACATATAGGGGTTGACAAAACAGAAGGGGAGGAAGGAGA  
GTTTTCTACCAGCATCTAGAGAGAAGAAACCAAGGATGTTATTAGACATC  
TTACAATGGACAGGATGGCCCTCACAGCAAAGAATTACTTGACTCCAAAT  
GTCTGAAGTGCTGAGGTTCAAACCCCTGCTCAAAGCCAATAACTGGACA  
TAAGGCCTTTTAGCTGTTAATTCTCAGTTGTCAACCCCTGATGTAAAGCTA  
CTGCCCTTGGCGAATCCTTATGCCCTCTAACCACAAAGGTGCAGAGGTCT  
TGAAAAATATTTGAACCAAGTCACATCTCTCAAATGCTCTAAGTCAATATC  
CCTTACAAATATCTCTTATGCTGGTTAATAAACTACTAATTTACAGACAG  
ACTGGTAAATAGCTAACGTCTGGCATTGAGCGAGATTTGGTGACAAACAT  
GCTTGCAATATCCACATCCCGAGTTTGTCTCTGATACATTCCCAGCA  
ACCACACATTAAGTGTGATTCTCTGACTAAAATGATAGTGATATGTAGGA  
TGAAC TATT CAGAGGAGTAAATAAGTTAGTACATGAAAAGGTCTCAGAAT  
GGTGCCCAAAATGGTAAGCTGTCATTATTTATTATTAATGTAGCATATGA  
GAGAAGGAAAGTTAGAGAAATTCGTGTCACTCTCTCTCTCTAGGTGGTGT  
TCTGAGTT CAGGATATAAGGATTTTTTTTTTTTAAATTAAGTAGTCAAA  
TCACTAACATGTCCAGATAAAATAATTTCACTGGAAAGCAGAAGCTAGAAT  
AAAGAATTCTTAAGATTTCAAGCACTTGTTAGAGACATGAAAGTTTATTT  
GCAAAAGTTAGATAAAATCCAAATCACGAGACAGGATTTAGAGGAAGACTG  
TCTAAATGTCTAAGCTGAAAGAATGGTGGCTTCCTTGGAAGCCAAGCTTG  
GGGCCCTGTAGAACCTGCCTGATTTAAAAACCTTATCTTGACCTCATATT  
CTTGCGCAAACTCCTTTTCAAAGGAAAAATTT CAGTATACACAGAAACAC  
CCAAAACGAACTCAGGACACCTGTTA ACTATGAGTGGAGGCACTTAAAGT  
AACTGGCATAGATTCTCCCTCTCGGTCCACATTCTGGTCAGGCAAAATCA  
AACATTTAGCTTTCACTTTTGCATGACGTATCATCCTACACACACCTCTC  
AACACATGTCCATTAGCCGTAAATGGTCCCAAATGTGGGCCTTTCTGAAG  
TGATAACAGCAGAGCTATTAAAACAGTGACAGATCCTAAAAATATCTGCT  
ACTCCATCCCCTCCTTCCATTGCACCCTCCCACCCCATTTCTTACCATCT  
TGAATAACTTAACTTCTCTCATTTGCTGGCAAATTA AAACTGATTTATCT  
TGGCTTATTTACCTTGCTTATCAAACAAAGAGTAAACATGCTGGTAAACC  
AAATAGCAACTAGAAAAAAGATACATGATTAAAGGGGTGTTAATCATAT  
TTGACTCTTTTCCAAAATAGTGCTCATGGAGAACCTAGATTTAAAACTAC  
TACTTGCAAGAAAAAATATTAATATCTAGCGACATCCAATGTACTTTTA  
GAGTTATAAAATGTTTAAACTGGAATGATTATTGGAATACAAAATAGTCC  
AACC ACTACTCATCTGTGTCTTCATT CATGCATTAGTTCATCCAGTGTTT  
ACTGAGTACCTGCTATAAGCCAAGCATGTACCAAGCTTCAGGAGCATAAA  
GCTAAGCATAAAGCTAAGAAGCTAGACGAATGA ACTAGCTAGAGCAGAAG  
TCAGCAA CTCTGTAAAAGCCAGAGAGTAAATATTTTGGCTCCACAGA  
CTGT CATAACTACTCAACCTTCCATTTTAGTACAGAAGCAGCCATAGACA  
ATCTGTAAACAAACAGGTATGACTGTGTTCTATAAAATTTTGTTTATAA  
ACACTGAAATTTGAATTTTATATAATTTT CACATGTCAAAAATAATCATT  
CTGGGATCCCCTGGGTGGCTCAGTGGTTTAGTGCCTGCCTTCGGCCCAGGT  
GTGATCCTGGAGTCCCGGGATCGAGTCCCATGTTGGGCTCCCTACGTGGA  
GCCTGCTTCTCCCTCTACCTGTGTCTCTGCCTTTCTCTCTTTCTCTCTCT  
CTCTCTGTGTCTCTCATGGATAAAATAAAATCTTTAAAAAATAATC  
ATTCTTCTTTTGTTTTTTTTTTTTTTCCCACTACTTCAGCATGTAAAAAC  
CAACTC AAAAAATGTACAAACCCAGGCAATAGAAATGTTTGGCCTACAGG  
CCGTAA TTTATCAATTGCTGGTCTAAAGGGGGAAAAATACAAGAAATCAT  
AACTTCCTAACTGGTAACCTGAATAAGGTAAAAAAGAAAAAAGGATTGT  
GATTAGATACCCATGTGAGCCTAAAATTTCTACTGGAAGTGAAAGAATAA  
AGGAAAGTAAACCTTCACTTAGCACCTTTTGCTTCCTAAAATCATATCTA  
CATCTCAGGTGCTGCTGTGCCCCTTTCTACCTCCATCCCCACGTGAGGTC  
CAGTGGGTTTGAGATCGTCCAGGTAATTAAGGACACTTGTCTCAAGACAG  
AGAAATCTTAAAGAGTTTGGATAGTATCTGATACCATAATGAATTAAGAA  
TATGGAGAATCTAATATGAATGAAAAAATTTAATTGTCTTGTGAGTTTCA

GAATTTTCATCTTGACCATGGAATCAAAGACCTGGGGGAAGATCTTATGA  
TTGATAAGCAGTAGGGTAATATGAAATGTATTCAAATTAGGAACATAAAG  
AAGTGGAATATCTCCTCAGGAGGGGTACAGAGATTTGGGGATAGAGAGT  
AAGATTTGATTTGAAGTAGGTCCCAGTAGGAAATGTTTAAGGTGTGTCTG  
GAAGATAAATGAAAACCTGACTGTGGTATTTTCAGCAATGATAATAGCCTA  
GTGATTTGGTATAACTCAGATAGGTCAGCCTTTCTGGAGTGAGTACATGT  
GACCAAAAGTTAGAGGAAAAGTGGGCTTAGAGGCAAAGCATTAAAGGGTCT  
TCAGTAATAGGAGATCTGAATCAGAGGAGAGATCCAAGAGGGTTTCAAGC  
AGGAGAAAGGCATGATCAGATCAGTGCATCAGTGGCTGCATCTGTGTTAA  
TATGGTTAACTCTGGTCACAAGGTAGAGAATGGCATCAAACACGGATCAG  
AGACATGACAACCTTGCCCAAGGTCACAGAATTAATAAGAGGAAAAGAAAC  
ATACACATACATACCCAAGAAAAATTAAAAATAGAAGCTTCTGATACCTC  
TTCTAGCACATTCCATTGATAAGATTTGGTCTGTTCTCCAGCCTTGATCA  
CAAAGAAAGACCTTCGAGTAAAAGATGATAGTGCTGATTCACTCTCTATA  
AAGCACCCACTTTGAATTATTTTTCTAAGTAGCCAAATATATTTGCCAAG  
AACCATGTCTTCTTGAACCTCTCCTCCTAGCTGATAACAGCATTCGTTTTT  
TTGTTTGTGTGTGTGCTTTTTTGTTTTTTTTTCTGTTATATGTATTTTGAT  
AACAGCATTTGACTATGAAGTGACTATTAGAAAAAAACAAAGAACAGCAA  
TCTGCCTGCAAGTCAGACCTACTCCTGATGTCTTATACACACCAGCAATA  
GTCATATGAAAAATTCTGGGGATTCTAGAAAAGTATTTTAATGTTAATCA  
TTCTTTAATTGTTGTCTATTCCCTTCATAAATGTGCTTCTTTATCTGCCA  
TCTGAATTGAGGATACAGGGTATGAAAGCTAAAGAGAAAAGTGCACTGAGT  
ATGCACCTCCCATGCCTTTATGTATTTTTGTACATAAGTTCTTTCTGT  
ATTTTCTGTATGAAACCTTTAAAATATTGGTAAAGTTGACAACCAAATT  
CATTCAGTCCATCCCCAGCATTTGGGCCAAGTCAGAGTGGCTTGAAGAT  
GTTGAAGAGAGGGAGCTGGTGATTGGATGGAGGGTTCCCTCTCCAAGGGAT  
GACAGGAGGCAGTAGCTACATCAAAGCAGAAGGCATATCAGGCTGTCCTT  
ATGGAACAGAAATCCAAAAGTCTGCATCAAGAGGAGAAAGAATTCAAAC  
CTCAGTATTCATTGTTAGCTCTTTATCTGCTCCATATAAAAAGAATAAAG  
GGGAAAAAAGAATAAAGGAAGAAAATGTGACCTGAAGCACAAGTAAGAA  
CACTTTTTCTTTTTTAATTTTTTGTTTAAATTCAATTTAATTAACATAC  
AGTGTATTATTAGTTTCATTCATGAGAGACACAGAGAGAAGGTAGAGACA  
TAGGCAGGCTTCTTGCAGGGAGCCTGATGCTGGACTCGATCCCAGAACTC  
TGGAATCATGCCCTAGGTCAAAGGCAGACTCTCAACCACTGAGCCACCCA  
GGCAGACTATTAGTTTCAAAGGTAGAATTTAGTGATTCATCGGTTGCATA  
TAACACCCAGTGCTCATTACAAGTGCCCTTCCTTAATGTCCGTACCCAGT  
TACTCCATCTCCCTACTCACCAACCCCTCCAGCAACCCCTCAGTTTGTTTCC  
TAAAGTTAAAAGTCCCTTATGTTTTGTTTCCCTCTGTTTTTGTCTTATTT  
TACTTTTCCCTCCCTTCCCTCTATGTTTCATCTGTTTTGTTTCTTAAATTCC  
ACATATGAGTGAAATCATATGGTATTTGTCTTTCTCTATCTGACTTATTT  
CACTTAGCACTATATCCTCTAGTTCTATCCCCGTCATTGTGAATGGCAA  
ATTTCAAGTCGTTTTGATGGCTGGGTAATATTCTATTGTCTATATATATAT  
ATATGATAGATGATAGATTATAAATAGATAGATAGATAGATAGATAGATA  
GATAGATAGATAGATATTGCACATCTTCTTTATCCATTATCTGTTAATA  
GACATCAGAGCTCTTTCCATATTTTGGGTATTGTGGAAATTGCTGCTATA  
AACACCGGGATGCAGGTGCCCCCTCAAATCACTGTGTTTGTATCCTTTGG  
ATAAATACCCAGTAGTGCAATTTCTGGGTCATAGGGTAGCTCTATCTTTA  
ACTTTTTGAGGAACCTCCATACTGTTCTCCAGAGTGGCTGCACCAGCTTG  
CATTCACCAAAAGTGTAAGAGGGTCCCTCTTCCCTCTGCATCTTCACCA  
ACATCTGTTGTTTCCCTGAGTCGTTTATTTTAGCCATTCTGACCAGTATGA  
GGTGCTATCTTATTGTGTGTTTGTATTTGGGTTTCCCTGATGCCAAGAGAT  
GTTGAGCATTTTTTTCATGTGTCTGTGGCCATTTGTATGTCTTCTTTGGA  
GAAATGTCTGTTTCGTGTCTTCTGCACATTTTTTTTTTCTTTTTTAATTTAA  
ATTCAATTAATTAACATATAATGTATTATTGGTTTCAGAGGCAGAGGTTA  
GTGATTCATCAGTCTTATGTAACACACAATGCTCATTACATCACATGCC  
TCCTTAGTGCCCAACCAAAATTACCCCAATCTCCGTACCCCCCTCACCT  
CCAACGACCCTCAGCTTGTTTCCCTATGATTAAGAGTCTCTTATGGTTTGT  
CTCCCTCTCTGATTTTCATCTTGTTTTATTTTTTCTCTCTTCCCCTATGA

TCTTCTGTTTTATTTCTTAAATTCACATATGACTGAGATCATAATAATT  
GTCTTCTCTGATTGGCTTATTTCACTTAGCAAAATATCCTCTAGTTCCA  
TCCATATCACTGCAAATGGCTAGATTTCACTTTTTGTGGCTGAGTTCTT  
TATCCATCCATCTGTGCGATGGGCATCTGGGCTCTTTCCATATTTGGCTAT  
TGTGGACATTGCTGCTATAATAATTGGGGGCTTCTGCACATTTCTTGATT  
GGATTCTTTATTTTCATGGTGTGAGGTTGATAAGTTCTTTTTAGATTTT  
GGATACTAGCCATTAGGAAGCTTTCTTATATTTTTAGAAAGAAATATACGT  
CTATGACATACTATGTAAGAGAGGGTTCTCACCAACTTTACAACAAACCC  
GCTAGCATCCCAACCCCTAAGCTGATGCCTGTAAATTCTCCAAAAGCTG  
CCACCACATTTTTGATAAGAAGTCAAGAGGAGAATCAAAAGGTAAGATGC  
ATCCTGAGGTCTCCATCTGCTTAGTCAGGAAAGAAAGATTTGTGGAAACT  
CAGTGTTATCTTCTGCATCTCAGCCTCACTGGAGTTCCCCTACTGGAAT  
TTTGTACATAGATAGACTGCCTTGTTTGAATAATCAAGAAGCTCCACAGAT  
GATGAATATTTTTATTCTACTTTACAGAATGCCCAGAATCACCTGGCTA  
CGAAGTGACAAAGTTAGCACCCCATCATCATTGTGTGTATGTCATAGGGT  
CATGAAGGAACACCCCAACAGGAGCCCAAGAAGCTGTGGTGGTCCATTAG  
TCATGTAGCCCATTTGTTCTACATCTCCAATCAGAGAAAATGGAAGAATTGC  
CCAGGGAAACTCCATCTGGAGGGGCCACCAAGCCAACCTTGAACCTTGATT  
TCTCCCCTTCATTACCTCACAGACACCCAGTCCCTTCTTCAGACCCAAT  
GGAGCCTGAAGGTTTCAAATGAGCCATAGGAGGAAGGCGCATTATTAAGA  
GAATGGAAAACAGAGTGGATTCTGACCAAACGGCAACCCCTCCAAATGTA  
GTGTGTTCCAAAATAGGAACAATTGGAAAGTCAAAATAAGTGTGGAGAAA  
CCCAGAAGTTGCAGGAAAAAAGTCTACATTTAAGAGAGGTTTGAGGCCAT  
CAGGAATTTTCTATCACTGCTCACATGTGGCTTACCCGGAGACATGGATG  
GGGCTAAGAATCTAAGATTATTTTCACTCCTGTCCAGACCTTTGTTTCTT  
CTAGACTTTATACATCTTGGAGACATGGGAGCGTGAACATAATCGACATGG  
AATTACTTACGATAATAGTTTCCAGAGCGATTACATTACTTTTGATTCT  
AAACACAGGTTTTGTTTCTAAAAGAAAATTATATTGTTTGTTCGAATAC  
TTGCTTTCTTTTTTTTTTAAACACTTGTTTGGAGTTTCTCCATGGAAGGC  
GGCAGTAGCAATGTTATTTTTCTGAATAAAAAGCATCCAAAGGGCCATT  
TAGCAACTTATCGTGCATAAGTACAGACACATTAATAAATATATGTGTAG  
TCCTACAGTCCCTACATTTCACTGGGAAAAACAGAACATATTAGCTTGTA  
ATGGTTTAGTTTACTTTGATTATCTTTTACACTGATTACTGGCTATCTTC  
TAATATTCAAATAGTATATTCCTATGCAAGACATTTAGAAAATACAAAA  
AAAATAGTTACTCAAGTCATATAAATACTAAGAAATTATTTTTTCTTTT  
CTCTGTCTCAATAGTTACATAGATCTAAATATACAGATAGACATATATTA  
TACATATATATTTTATGTACTATTTTTACCTAAAATGTCACGAATTTTCT  
TCCTATTTTGATGACTGAACTAAAATCTACTGTATAATCTTGCATAAATG  
ACCAATTTGAGCACATGTTGTTGACCGCTCTTTGCAGACAGATTTTTTA  
CAATAGGATCTCAGATGTCGATTGTTGAGTTATAAAACACTTAAAGATAC  
TAACACCTATTGCCAAAGTGCCTGTTTACACTTTCAAGTGGTTTATAAA  
ATAACACTCCTCACAGCAGCCTGATAGCATCATTACCTATTCTTTCAA  
ATCACTTTTTTCAAAGGAGGTAAATATTTTTATCAGTGTTTCTTTAACAA  
GATTATTCCCTATTTTCTTTTTTTTTTTTTTTTTTTTTTAAGATTTTATTA  
GTTTATGAGACAGAGAAAGAGAGTACAAGAAGGCAAAGCGTCAGACAGAG  
GAAGAGGGAGAAGCAGGCTACATACTGAGCAGAGAGCCAGATGCGGGGCT  
CTATCCTAGGACCATTGGGACCCCAAAGTAGACACTTAACATAAGTCACCTA  
GGTGCCCTGAATTCTTTTCTATTTTCAATCACAATTTGCATCTAGGGCAA  
GTCTCATACTTTGTTTTTTTTTTTTTTTTTTTTTTTTTTTTTTAAAGTCC  
TCATACTTTGATCAATGTGAATGGATTTCATGTGACATTGACATTGGCTC  
CCTGGGATGTTTTCTGCTCCTCAAATCTGATTGTCTATTTGGTGGGTCTT  
TGAAGAGACCAAGGCCAAACTCCCAATTTAAGTTCTCTAAAATCCCCAAG  
GGGCAGAAAAGTACCATGAGGAAAAGATATCATTATATCCACGTGGGACA  
ACCAACTTCCTTCTGTTCTGTGACCTCGAACAGCCATTTAATCCTTGTC  
ATCTGTTCTGCTGGTTTGGAGCCCTGGGAGGCTGGATAGGAGAGTCTGCA  
GATTGTTCAATCACTCATTCAATTTTATTTGCAATCTCAAACGCCATGCCT  
GTGTGCAGGAGGGACTTGGAAGACTTGGCAAATGTTTGACACCATGACTC  
TTTCCTGCTACTTGATAAATTCAGGATCTGGTAGTAGAAACATACGTATA

AGCCAATAATGCCATGTGACAAGTGCTGTCAGAGATGTGGCGCAGTGTGT  
CTCACACACAGATAATATAATAATCCAGCTACATGAGAAGGGGATTGGCT  
GTGAAGATGAGGCTAAAGGAGCTCTCTTGCAGAAAACACAGGGTATGCAG  
AGACCACAGTGTTCCAGAAGCTCTGCATTGTTTGGGGTGAACAGAATGTA  
AAGCTTAGGGTCAGAGAGTAGATGAAAATAAGACTGGAAAGAAGCAGGAA  
GAGAAGGCAATTAGGATTCTTACTGCTCATGCTAAGGAATCCGGATTTCT  
CCCAGAGATGACTGGAAGCACCTGATAGATTTGAGCAGCAGGGTTGAAGT  
TTCTCTGCCACCAGCCCACAGAGTGGGTAAGAGGGAAAAGTGATTGGAA  
CCTGTGGGTCACATAGAGCTGAGTTAGTCAAGGTGGCTCCGTTAACAGAT  
GACATACAAAATAATGGGTAAATAGAAGAAGCTTGTAGTAGGTGGGTGGG  
TAGGTAGACATGGCTTAGGAGAGAGATAGGCAGATAAAGAGTGCGGTGTT  
AGATCTTGCACTTACCTGCGAGTTATAGGGAAAGACAGCGTTACCAACGT  
CAAATGAAGCAAGACAAATCTATCCAAGCCAATATGGATGATGATAGCTA  
ATAATGAGAGCTGCCTATGTTTCTTACATGTTTCATAGTGCTGAGAGCTGG  
ATAATGAGATTTTCAGTGATTTTTTAATTACTTTCTTTTTTTTATATGTATTT  
TGCTTTTATATTATCAACCATATAAGTATTATTTTATGTGTTTTTAATAGT  
CCTGCAATGATGTATGTATACCATCAAAAATGTCAGTTTTTGTA AACCTA  
AAGCAAAGAGGAAAATAATTTTCGGCTACCATTTCGTAGTATCTACAGGTAG  
GTTTTACACAATATCCAGGGCTTTACATGTGTTTCTTTTTTTATTTTTTTT  
ATTTATTTATTTTTTTTACATGTGTTTATAATCCTCATGACAGTCCTGTGA  
GGTACTTGCTACCCTCAGAAAAAGGAAGGAAGTCTAAGTGCACAGAC  
TAGTGTGGTAGATTACAAAACCCAATTCTCTACCCCTCCTTGTATCCACA  
GCCTTGGAATGTGACTCTTATGCTGTTCTCTACTAAGAAAGTTGAGTCTGT  
TTCCCAACCTCTTGAATTTTCAGCTAGTCTTCTGACTTTCTTCAGCTAAGA  
GAATATGGAAGCTGTGATGTGGTCACAGTTCAGAGCTTGGACTTTGAGAT  
CCATTGGACACCTGTACTCTCTCTACCTCCATCACACCAATAAGGCCAGG  
CTAGAATGCTGGACAATGAGAGACAGTGTCCCAGCTGCATCTATCATCTC  
AGCCAATAGCCAACCAACCATTAACATCAGACATGGGAACAAGACCATT  
GTAGGGCAGTGTGATGCAGGCTGACCTGCAAAGTACAGAGACGACTCCTG  
AGTAAGCCCAGCCAGGATCAGGTGAACTGACCAAAATCAGCAGAACTGTC  
CAGCTGACTCATATGTAATGGTTGTTGCTTTGTGACACTTAGGTTGCGGC  
ATTTTGTTATATATCACTGATACAATAGAAAGTGGAAAGAGCTGAGTTTTG  
AACCAGGTCTAGGCTTCTCCATGTGTCTTCAAGGCGTCTCTGTCTCCAT  
TATGGAGTTAGTGATCTCTCTGAAGCTTCATGCCGAATTCTCTTTCCCTG  
CCTCTCCTCCACAAGTGCTTTTAATTGGAAAGCACTCATTCTGTCTCCTT  
CCAACATCTAGTTTGGGTACCGTATTTAAATTTGTAGACTGCTCCAGGA  
CTGCCAAGCGTGTTATGTTTCGTTTTGAATAATTTGTTGATATGATTAAG  
TTGCTGGAATGGAGAGTCTCTATACCTTGATTCACTAATAAAATTAGGAT  
GCACTTAAGAATATATTTTAAGAATATATGCCACCTTCACATATTTCACT  
TGGTTTTATATTTATATTACTACAAGGTTAAAAAAGTATCATCATACCT  
ATTTTACAGGTAAAACAAACAAACAAACACAAATCAAGACTAAGATAGA  
TATAGAGTACTTGTCTGGGATCAAGCCGCGAATCAGACACCCCGTCTGCA  
AGCTCAACCTGACCTTACCACCAGACCATGAAATCTAGAATCTGACCCAG  
AATTATTTAATCCAGCTGTGAGTCTTAGGAGGCCATTTAACATGCTGGCT  
TTCTAGTTAAAAATAACAATCCATTTTCTATTGGATTTCAAACACTGCTG  
GTTTAACCAGGACTCTTCATTGTCCCCAGAAGTATAAGGGAAATGAATCA  
GCCCTCAAAGAGTATAACCTCCACGAGGGCAGGCCATTGTCTGTTCCCTT  
TGCCGCTGGGTCCCCAGTGCAAAGAAGAGGCATACAACATTAGTAAACAA  
GTGCTAAATTTCTTAAATACTCACTTAATCCTCACACACTCTTACTTCTT  
GCAAAATTTCCCTTTTACAGACGAAGCATTAAAGATTGAGACTTTTAGAT  
CTTTTCCCTGAAGGAATCGGAGAATGAGTGGCCGAGTCAAATTTTGAAC  
CCAGGATTGTTGACGTCAAAATGCATGCATTTTTTTTAAACCCCTTTTTTCT  
TCCCCAAATAATAGACATGCGGGCCTGACAAGATAATCCCTAGGCTTAGA  
TTTCTATGAGTAGCCTCAAGCCGCTATCTCTACCAGTGATTAAAAATGAG  
GAATCAGGCTTCATTGAGCTAAACCAGAATAAACATAGTAGACATTAATT  
TAAAAGAGACTTCCAGATTGTTAAATATTTGAGCCATCAAGGTATGCTGC  
AAATTAAAATGAGATTTTCTGATTTATGGTTTGACTCCACAGGGAAACAA  
TTTTGTAGGTGACCACTGCCGACGTGATTGCACCAGGGAATTTGTGTGAT

CATTTACAAAAGTGCCGGAGCATGACTGTAAGGGCCAGATCATTTCCCATT  
TTGCCTTTTGATTTGCTCTTCATCCAGGCCTTTCCTAACATAGCGTGAAC  
ACAAAGGTCAATTTCTGTCAGTCAATTTGAAAAAGGCCAACTCTCAATTA  
ACTTTGCAAAAGAGGTGAGAGGTGATGTGGAGAACTAAAACCCACAAGTA  
ATGTAACACCCATTTAGCTCTGAGCTCAAATAGCCACCTCTAACCAA  
ATGCTGATCGGAGCTGCTAACCCAGGAATAACACAGATAAATTTGCAATCT  
GTTGCTCAAACCTCATCATTTCTGCTACCTACCTTGGGTGGACATATCAA  
TAAGAGAAAAGTTGTAAGACTAGCAGCTGGAGAAAGAAGGAGAAAACAGA  
GAAAGGGATACTGGCACAATAGGCAAGCTAAATATTATTAAAGTAATTTA  
GAATGTATTAGATTCTTTCTCCAACCTCAAATAGACATGCAAGTTTTCC  
CACTCACTTTTTAATTGCCCTCCCACCCAGCTGATGAACCAACATTTCTG  
GTGCCAGGCGGAAGACTCTGAACCATTGAGACACTATCCTACTCTCTCAC  
ACTGTGGAGTGGCCCCCTTGAATCCAAACCAGACAGTGGAAAGTCTTGCTG  
TGGTCTACCAAAATTCAACCCCCAAATGCTTACTAAGCCCTTAACTGTTGA  
CATGGGGCAATATCAGGGACTCCTCAGTATGCCATGCTCTCTCGGGAATG  
GTTTTATTAGCCTTGTTGAGTAAGGGACACAAAGCCAAGGGGGCTGGGGA  
GTCCGTATAAAGGCACCATTTCCACCTTTGATACAAATCCCTGTAATCAAA  
ACCATATTTGGCCCACTCAGTCTTACTTCCAAACTCCCTCTGAGACGCTA  
TAAACATTTGGCAGACAATGCTTACAATTAAGGTGGAACACGTTCTCATAA  
ATGTTTGTCTGTCTGCTAATTGTTTTAGTGACTAGTAGACGATGTCTT  
GTGGTCAGCCTGGAGAACAACAGCAAGGATCCCTAAATCCCCACCGAGAA  
GCAGCTCAGGAGAGTGGCACGATGACAGTGCTGGACTATGCAGCAGCAGC  
CTTGGGAAGCGTAGAAAGATGGAGGTTAGGATATGTTTTCCAGCCTTAAT  
TGTCCAAGCGTGGGCTCGGGGTAACGGTGACATGATCAAGCTTCCCCCTC  
TTGCTATAAAGAAACACTGAGAGACTGTGTGCATTGTTGTCTTTCAATAC  
CAAGGGGGGAAGTGGGCGAAAAGAAAGTAAGAGTGTTCTGGCACCAGAATA  
ATTTCTCCATTACCTCAATTAGTTCCAATGATGTGGAAAAGTTCTGTCTG  
GAGAAATCAAACATAACGTAAAATCACTGAAGTGCCGGTGGTGGCGGCGG  
TAGGTGTTGATACAGGCATTAGTCAGCAATACTGATTGCAATGAAGTCAC  
TCAAAATAGCCCTGTGCTGGAACCGGGGCAGAGAAATAAACTCATTAGAT  
CACCCCTTTAGTGAAGCATGTGGTTTTCAATGTGGCACCAACGCAACCT  
GGCACCCACCACAAGATTTAGCTGTCTGCCCTTGGAAGGCACAATTTACT  
AAGGTGTCTGGTAAAGAAATCTGGATAAGTTATTATTATTTTCTACAGAA  
ACATAAATAAGTCCTCTTTCTTAAGAGCCACATTAGCCCTTAGTTATGAG  
ATGTTGAATTTTCTTTAGAGAAGTAAGTGGTTCTTTGCAGCTACAGAGCC  
CAGAATGGAGACAATAAAAGGCAGAGACTACAGGAGATTTGGGTATTAC  
ACAGGGAAGACTTTATAATGCTTGAAGCTGGTCATAAGGTTCTCATGTGG  
GGATAGATACTAAGCTCCCCATTGGGTGTTTCAAGAGAAGACTGGGCCACAA  
CCCTCCAGGGGTAATATAGGGGAGAGTCTTGCAGTGAATGGGTATCGAA  
TGATTTAAAATTTCTTTCTCGAGCTAAGATCCAGCTAGCAGAAGGAGATG  
AGAGAATAAATAAAAGCCATTAAGAAAAAAAACCCCTCTAGATTCTCAAAA  
TATAGTCTGTCTATATACAGAGTTATATTAAAATCATGTTTTCTTAAATGT  
TTGAAAAAATCGATAAAAAATGGAGATGCTCTGCGATGGGTGAACGACTT  
TATCAGTAGTAAATTTCTCCAGTCTAATGATAATCTTCTTCAAGCACTT  
CTTTTGATAAAAGGTCGATGAGCACAGCATGCAAATGGATGTATGACTAG  
ATAGATAGGTAGGTAGGTAGGTAGGTAGGTAGGTAGGTAGGTAGGTAGGTAG  
ACTTCCCTGTGTGGTTGATGAATTTATTATCCCACTACAAAAA  
AAAGCTGACTTAGGTATTATTTCCAGGTTATATAACTGAGGAACTGAGT  
CTCTAAGAAGTTGAATAAATGCCCCAAATCACACAGCTTAAAGTGATA  
GAAGCAGAATTAAGATAAAAAATGGAGTCAGTCCCAGCTCCATCCACCT  
CTCAGGCTTCTTTGCAATCCTGGTCAGGGCATGGCTTATCCTGCTTTGA  
ATGACTTGAATGTTAAATCAAGGAGGGATAGGGCCCCCTATTTCTTTATC  
ATTGTGTAGAGATGGTAATAATCAATGATTGATAGGAGAATTTAAATG  
TCTCCTCAAAATGATTTTCCCTTTTTCAAGGTGACGGGTACATACCAAT  
CTAACTACTGACAAAGCTGGAATTTACACCCCACTAGGAAGCCAGAGCC  
ACTTGGCTTCAAGCCAGTCCCTGAAAAGTGAAGTGTAGTTAACAATGGC  
ATGAGCCCCCAGGGCATATTGTTGAGAGAGCCAAGTTCAGAATTATTCAT  
GACTATGTTGGAACCTCAATGACTAGAAAGCAACCTCTTCTCCAGCAAGT

CTAAAATTTTATAAGATAGATGAGAGTGATGAAAATATTACTCCTCCACA  
TGGGGATTTTCAGCAACATGGAGGTGTTTTTGAAAATGCTATTTGAATTTT  
CCGGTTCCCTGAAAAGAGGCTGACTTTTACAGCTCGCCATAGACTAGGGCC  
CCACGCAGGAATCCAAGTTAGAAAAGGGTCCCTCATCTGTGGTTTTTCCTC  
TGATTCCAACTTTGTGTTTCATGTATGTTTGTTCATCCAAGTGTCTTCA  
TAACGCTATCTTTCAAATTACAAAAGGCAAGTCTTTATAAGTGAGGACAA  
TAGGTAACCATTCTAATGTACGTCCCTGCAGAGAAAATTCCATATAGCCC  
ACCAAGAAAGGGCTATTTTAATTAGTGTTTAACTGAAAACCTTGATTACC  
TACATTGGTGTGGAACAGGAATTGCAAAAAAAAAAAAAACAAAAACAAA  
AAACAAACAAAAGCTGCAGACAACTGGAAACATTAGACCAGGTTTTGAT  
TTTCATGTTCTCACATACCAGCTCTTCCCTACAGTCATGTTGAGGGCAT  
CACAGCATATTTCAATTATAGATATTTAAATATCTTAGGCTCTTTTTACTC  
TTTTTACATTGGTCTCATCACTCCCTAAAAATTGTAAACAAGAACCACAT  
CATCATGAAGAGCTTGGAAGTACTCCGTGCAAGAAGAACCTAGAATCAGT  
CCACAATTCTGCTTCAGTGTGATCTTGAGTAGATGATTTAACCTCTTGGA  
GTGTCCACAGTAAGGATTATAATGCACCCTTTCAACCTTCCATCAGGTTG  
TGGAAAGTAATAAATGGGATACTTATTTAAAAATCACCCAGCACAGTGCCT  
GGCACAGAGTGAAGGCTGGTACAAATGTACGCTATTAACATGGTTATATT  
CTCGTCTGCAATAGTTTTGTGTTGAACACTTAGTAGAAGCTCAATATAA  
AAGTGATAATTTGTAACACCAGGGAGAGACAATAATCACAAATTGCACTA  
CACTGACTATACGGCAGAGTAATTCCGGGAATTTTAAATTTATTTTATTTT  
TTAAAAAGTGTCTCCCTTGTTACGTAATCCTTTCCGTGCCTTTCTTGTTT  
CCCTATTTTATACTTTGCCCCAAAGAATCATTTAGTGTCCAAAGTATTAG  
ACTCTTATAGGTATTCAGAAGCCCCAGGAGAAATGGAATACATTTACAGA  
CCCATAAACATCTAAATTAGCGCTATAAATGGGAAATATAGTCTATAGTT  
GGAGAGTGCCCAATACATAATATGTTGTGGCATAGAAGAGACTTCCTTTT  
TGGTGGCTGGAATCTATTTGCTCTAAGTATTCAATTTTAAATGGATA  
ATAAAAAATAAATAATAGGCATGCTTCTGCTTAAATTGCACCTTTCATGGG  
AGATCTCAAAGAGTTTTTCAACTGTTAATTTATGACCCCTGGGGAAAGCT  
AGGTGGCAAGTAATATCTTTTTTCCCTCAAATGGAGAAACAGACATAAAGA  
GGCCCAAGTGACTTGTCCAAGGACACAAGGCGAGCCCTGGCTTCAAGCAA  
ACCATCCTAAGGAAAACACAAAGGCAGAGATATTCTCTTTAAATGATTAA  
AACCTGTATTATTTACCTATAAAACCGGAGATGAATGCTAACGTGGGTTG  
TGTAACCATCATACAACCCACACTATTTTCATTAGTACATCAGCTATCTA  
TTTCTGCAAACTACCACGAAACCTTAATAGTGTGTATTGGTAAATATTTA  
TTCTGTTCATGTAGCTGCAGGTTGGCTGGGAGCTGAGTCTCTAGACTGG  
GCCGAAGGCTGAGCTCAACTGGACTGACCAAGATGAAGGTTCTTCTCCCT  
GTGTCTATGTGGAGCAGACATCCTGCCAGGCATAATCATCTCATGGCAAT  
GGCGAAGGAACAAGAGGCCCAACCCCGACCACATAAGTAAACCATGCCAT  
TTCTACTAATCCTCACAAAGGCATGGATTTCTATTAAATCCACACAAGTCAA  
TGACTGAGCTCAAAGGAAGGGTGGGGAAGGATACTCTCCCCTATCATGA  
AGCTGAAAGGACACATGGCCATATCCCCAATTTAATTTCTTGAAAGTAT  
ACTCTCCACCCCATGGAAGTGAGAGAAGGGAGTGAGTACTGTCACATTGT  
AATATAATCTATTACAATCAGCATTTATGATTGTTAACATTTTCAGACATT  
TCGTATGGGCTAATCTTTAAACTCTGCCTGTTTCACATGCTTCTGTAACT  
TTCTACTGGACCACTGACCTGATCCTGGCCTCCAAGGGTGCAATTTAAAT  
AAGACAACAAATACCTCTAGTCACTTACTAGTATCTCCTTGGTATCTAAT  
TAAAGAGACGAATCAGATTTAAGAGGAAATTGCCTAATAAAAAAATAATC  
CTGATTTACTTTGATGAAATCATATGTGTTGGATCAATGAAAAAAAAAATG  
TGAGCTTCTTTGACCCTATTATTGAGTCTATTACAGACACTGTGAATAG  
AACCTGAGATTTCCAAGGAACCAGGAATGCTTGACATCTATAAAGGTGC  
AGTGAAATATCCTTAGCATATATGGATGCTTATTTTAGATGAGATCCT  
GTTAACTAACAACCTCTACATCCACGATGCCTCAAAGTCAAACACTCCAG  
GATGCCATGTGAGGATTCTTCTTGATTTGCAGCATCCTGCTGTAAATCTG  
AATTCCCCTCAAGTCATTTTCATGCTACCACTGTACTCCTCCAACATTTCG  
TTTGTCTTCTCAACCTAGACCAAAATTTCCAATTTGATACTCATTGAGTAT  
GAGACACATACTCTCTCTCTTTCTCCTCATGCTGTACAGAACTAAAAAAA  
AAAAAAGAGAGAGAGAGAGAAAGGATTAGGGTCCAGTCTAATCTGAGTA

TCCCACACAGAGATGAGATTTACGGGACTGTCATCATTTTAGACAATGAG  
TAATATGAGAAGGAGTCCAATGCATGGCAAGGCCCAAATGAGGTAGCCTG  
GATATAGAGGGAAAACAGGGAAACCAGTTATCCCTTTGACACCTCTTTGA  
AGAACAGCTTTCTCTCCAAGGTAGCCAAGTCTCTCACATCACTGCCAAC  
CCCTGCCTCCAGGCTCTATCTGAATCACTTTCTTTCTGGTTAAATCTGT  
GGATTCCCTGTGGGGAGAAGAGTGGCTCCCCTGAGGCTCAGGACTATTTCTC  
CAGGTTATATATGTACAATTTTCCATGCCTTTAACAAGACTCAATTAAA  
AATTAATCGGTCCAGCATGGCAATTTGAGAGGTAATTGTTTCTTTTCCTG  
ACTCTGTGGCCATAGGCCAAAAAGCACACCCAGAACCTAAATTAATCATCT  
AATTGGGATTTTTTCATACTCCAGCCACTCAGCCTTCCAGGGGTCCCAGC  
AATGTGCTGCCTGACCTCAGTAATTAGATTGCCCTAGTGTCCACTCTGTG  
GACTTTGTGCCTTACTTTCCCTTCCAAGTCCCTTTAGTAAAATGGAAAAT  
AGCCACATAGGCTATTTACCTGGGCCCTCCTCAATGACCAACAGCCTTTA  
TCTTCAGAAGAGGAAATACTAGAAACAGGGGGCAGGTTAATATATTCAAC  
ATGGTTTGTAAATAGCAAAAAGTTGGTTTCAACCTAAGAGCAGTCCTGCATT  
GGTTTAAATATAAAGTATAGTCTATTCATAGAACACGTAGAAATGCAGCTA  
AAAAAGAAGTAAGGAAATGCTGTGATTTTCATAGGTCTTTAGGTCAAACCA  
TACACATTTAACATGTACAGCAATGCTGTGAGTTGTAATGTAATTATCT  
GTTTAAAAAAGAGATGAATATATTGAACATGAAAAGAAATTAGGT  
TAATGCCAGAGGTATTTGTGTTTGTTCATAGTAGCTAACACACATTACTT  
TTAAATTTAGTTTTTATATAAGACACACATTTTGTGACTCTTCCCAAAT  
TAAAGATTAATAGCATTGTTTGGGTTCTCTAGGCAAGAAGGTAAAGGCC  
TGTATTTTATTATTTTCAATTTTTTAAACCTTGGCCTGAGTTTTGCATTTTC  
CTAAGGGGGTGGTTGGAGAAATCTAAGTATCTTAGTTTTTCTTAAGTTTC  
TACCTGCAAAAAATGAATTGAAATGTTTCACCATATCCTTCCCATATGCT  
TATCCATCATACATTAATGACCATAAATTAAGGATTTGGAAGT  
ATAATTGTTTAAAGTGAAGATAATTCCTTACATAATTGATATTCAGAAGA  
ACTGCCAACATTTGAGAGTCTCTTAAGATACTTCAGTTGTCTTTCCTTCA  
TGACCATAAACATTTATCTTTATCACACAGTGAGTGAATGTTCTGAGTAC  
ATTCAAACTATAAATTTATATATATTTGTATTTATGAAGACTTCGGATCA  
CCAAAGACATACTTGTACCTGGTAGGTAATTAAGAAGTTAATTTTAATT  
GAATCAACCTGACCATATCCCTCAACTTCAAGCCAATGTCTTTACATGAT  
AACAGTAACATATGTGTTTTGTGAACTATATAGTATCACACAAATATTAG  
GCATAAATATTGTAAATAATAATGGAACCTATGTATCTGTAAGTGGCAGTT  
AATAGTATAAAGAGTTATTCTTACCTAACCATTAAGACTTTATCTGCCA  
GTGCAGCCAATCTCTTCACAACAGTAAATGTAGCATCAATGATACTTTTT  
ATTTTTTAGGATTTTATGTATTTATTCATGAGAGACACAGAGAGAGGCAG  
AGACACAGTTCAAGGGAGAAGCAGGCTCCCTGCGGGGAGCCTGATGCAGG  
ACTCATCCAAGGACCCAGGATCACAGCATGAGCTGAAGGCAGACACTCA  
ACCACTGAGCCAACCCATATGCCCTGACACCTTTTTCTTAGGGCTTAATA  
GTTGTATTAAGTTGTGGCTCAGTCAGTCAGTCGGTTAAGCATCTGCCTTC  
AGCTCAGATCATGATCCCAGGGTCCCTGGGATTAAGCCCCGGGTGGGGGG  
TTCCCTGCTCAGTGGAGAGCCTGCTTCCCCCTCTCCCTCTGCTTCTCCCC  
CCTGCTTGTGTTCTCTCCTTCTCAAATAAATAAATAAAATCATTTAATA  
ATAGTTGTATGAAGTTGATGAAGGGCATTGTTGTAATTTTCTGGGAATA  
CTTCTAGATGTGTAAAGAATAGTACCAATACTCTTTCAAAAATCTTTGGA  
GTACAAAAAAGAGTCTTTGGAGTATACTCCAAGGAAACGAATGAATA  
AATAGAAAAAGTGGATCAATTTTTTTTTTCTGATACTTGAATCCTTACTT  
TGGAAGTGTGAGTCCAAGACCTAGTTCCATTTATAAAGGATCCCGGCTC  
TAGTACAAAACGATTTAAGCTATGCCTCTTCATCCCCTAGACACATTTT  
CCAAAAAGCTAATTCTGCTTTTAAAGACTCACTTCAATCTTTAATAAGA  
CACACACTTAAAAAAGAGACACACTTAATGCCTACACTGACAAAGAG  
CAGTAATATCGCACTTAACCTAATCATGATAGTCAAATGGTGCTGAGAAG  
TTTTGACAACATCTGCTTTACAAGTATATGGAAGGCAGGACAAACCCCAA  
TTTTTCAGTTTATCTGATTTAATGTGTTCTATAAACTTCAGTGTTACAT  
CATCGGTTACAGACCTCTCTGAACATAATAAAGTTATTTACACAGCTG  
CTGATGGCATAGTCGAGGTAGAATTATTAGGATTCTCCCAACTACCTGTG  
AATCATAACAGTCCCAGAGCTTTATTAGCTATCTCCAGGCGCAGCATCTC

CCCAGGGAGAAGAATTTGCAGCAAGCAGGAAGCTCTGGCTTCTTCACATT  
CATATCATGAAAACCTCAAGAGGGGCTCCCGTAAGACCTCTGACCTTTCCTC  
TGCGGCTGAGGTTGCCTGGGGGGGCTCTTTCTCAGGGAGAAAGATCCACCA  
GCTTACTTTTCCCCTCTCTCTTTCCCTCCCTCCCCTGCAGCCTCACCTGTGA  
TCACCCAGGGTAGGAAGAGACGAAAGCCCTCCCCTGGCTCTGATAACAGG  
GTTGCCTGACTGTAATTACAGGCTTTTGGCTTCCCAGCTATCCAAATGACA  
GTCACAATCGAGCCTGAAACTCCTCAGTCAGATGGAATCAATTACTGAGC  
AAAATTGGGAGGTTAATTTTCCCAGAATGAGATATGCCTTTTAGCTTTG  
CCATCTCTTTCACTCCAGCTGGTGGCTTATTTGGTTGCATTGTTCTCTGG  
CCACATGAACAAAGTTCCATTAGGAAGGATTTCCAAAAGAGTTGATTTGA  
AAAGGAAACTCCATCAGCCCCCAAACCTCAATACATTCTGAATGGGGGAAC  
TGTTATTAAGTAAGCAGCATGGATGGCTAGTCACTAGAAATTTACATTTGA  
TGGACATGGAGTTAATCCAATAAGAAGAAATGGAATCTTCCAGTATGGTA  
CCACTCCCTTCTTAGAAGTTCCCCTGGCTCTATAATAGCATGACCCAGCA  
TTGAAAGAGTCTTCTCTTCTGGAAACTGCAATGAAAAATAATCATTTCCC  
TCATCTGAATAATTTTCTAAGTATGATGAAGCATCTCTTTAAAGACAAAT  
AAAACAACCAGTATTCATCTTCTCCAAATGGAATTGCCTCTTCTGAATGG  
CCTAGTAAAAGTGCTATGATAGCTTCCATTTAATCAGTGATAATTATAAC  
AATGATAAGGATGGTATCAGTGACTAAAATTTAGTCTTTACCGTGTTGCA  
GGAAATGCTTAATATTTCTCTATTAAGTTCGGTCCCCTCAAACTTCCCTA  
AACCAAGGCACTGAGATGTTGGATCACTTGCTCATGTTTACTTGATTGGC  
AAATAATAAGCCAGACTCTAAACCCAGGTGACCAGATTCCAGAGCCCACA  
ATTGAGAATCATGCTACTACATGATCATTGTCATGGATTTCAAAAGGGAG  
TACTCCCATCACTTCGTAAGTGGGGAGATTGAAGTATGGAGATATTAAGT  
TGTTGAGTGTATGTGTCTCATGAATTAATGAGGCTGCTATTCTACATCA  
TACCTGTCAGACTCAAAAGCCTCAACATATCCATTAACCCCTACAGAGA  
CTTTGCAAACAGCCACTTTTGCACAGTCTTAGGTGACAGTTAACTAAAAT  
CATTTGGTGGCAATTATCAATTCTAACATAACTTGCAATCTTCTGTTGTC  
ATCTTTAGGAGTATGGCTCGGTTGAATCAGTGGATTTCATGTGATTTCCTAT  
AATAATATTGAATGCATTGCACTCCAAATCCGACGTATTTGTTTCCCTTG  
TAGCATCTTTAAAAACTGTCACTCCATGAAGTACATACTTCATCTGAAGC  
CAGACTTTGAGAGTTGGAATAACTTGTAACGTAAGATCTTTGGAATTAAA  
ATTTGGTGCCATTACTACTCTTGAAATTCAGTATCCCCGTGATATCTGAT  
AGATTAAAAGGCAGGTGATTCATCTATTGGCCCTCAGTCTCTGAGTCAGAA  
AAGTGAAGTAGTAATTGCTAGTTGTATGACATTTGTTGGAGGTAGAGCTT  
GGCGCATCAATTCAGTCATTTGGCAAAGAGTCACTGAGTTCCCTCCTGCAT  
CCCGCGTGGTAGCATGGTAGCAGCCCTGACGAAAGCCTCAGAATAGCAC  
AGACAATGTTCCCTGCTCTCACAGACCTCATATTCTACCGATAAACTAGG  
CCAACACATTTGCAAATGGCTTTTACATTTAGCACATGTTACGTAACGTG  
GTGGGGAAATAAATGGCAAATAAGTAGCGTTTTCTTCTTGCAAGTCAAAT  
AAGTTTTTTCTTTCCCTAAGGAGTATACAATGCAAACATAGGCAATTAGG  
AATATATGAATGTGGCCAACAAGAAAATCATCCAAACTGAAATGGAAAAA  
AAAGATAGTTTTTTCTTTCTTTTGGAGAATGTGAAGTGGGGGAGTGCTAT  
TTACATTACAGCAGGACTCCTTATGGTTCATATATATGTTGGTGTGCGTG  
GATCTTTCATTTTCATGAAGAAAAGTTACTGCGAAGAAATATCAAGAATAC  
AGATTAAACAAGTACTGCTAATTTAAAACCAATTCTAAGTAAATGGAGTTT  
AAAACTTCCGAAGTTCAAAAAAGAAAAGAGTCACAACTTATAGTTATA  
TATTATATACTATAAATTTATATATATACATTATATATATGAACATATATACA  
CAATTATAGAATTCATTTGTGAGAATTTGATTTCATCAGCATCATATCCTAG  
ACCCAGATTTTCATAAAGCGAGGCTCACCTCTGTTTTAAAATACATCTGGG  
GTGATACGATATTAATAAGCTAGGAGGACATTGAGTCTCAGTAGACAC  
TGAGAAAATAATGTTTTGTATAAGCCAAAAGAAACACACCCACACACTT  
TTAGTACCCCATAAATTTTTTTCAGATCTCCAGAACATGATTTCTGGATTC  
AGAAAGGATAAGAGGCCATATGGCTCTGGATCTCTACTAAGTGGTCTCCA  
TCCCATTTTTTTCTTTTCTCTTAACCCTGGCTTTTCTTCTCATAGACTCT  
GTTTCCCTTCCCTTGCAAAAGGTAGTCCCTGATTAGAGCTGGGACACAGCAC  
ACCTGCATGAGCACTAGCCTCCCCCAATTACAGCATCTTTAGTGTAGGTG  
TAGGAGCAGACCTTGTAAGGGGCTTTCTCATTATTATTATTTTGTGGT

CAAAAGGTTGCATATACTATTTTTTTTTTCTGCTGCTAAAGCTTAGAAAGG  
GTGAAAAGCAAATATTTTGATAATTATTCAGGCCATCAGGTTACATAAG  
AGGTTCCATAGCTTTCTGCATCAAACCTGAACAGTTGAAACCACAAATTC  
TGTTTTTGCAGCCATAAAACATTCGTGGCAAAAAAAAAAAGAGAGAGAGA  
GAGAGAAAGAGAGAGAGAGAAAAATAATAAAATCCATTTTCCATTCGCTTG  
AAACATAAAATTTAATGTGGTGAAAAATGACAGTTTACTCCCAGTAGGAA  
ACTGCTCAGAGCCTGTTTCAGAGGCATGGTGTGGAGACTTTGGTACCCAT  
GTGCAGTCACTGAATGCTGCAAGAAATTGAATACTGAAGAGGATGTTGCA  
CAGTAAAACATGTAAGGGGCAAGGTAAGTAAGCCCTTGTTCAAAGTGGAA  
AAGGCTTCCTTCTCTGACAAAATTGCTAAGTTACAACATTCAATAATCA  
CTGTTTCGATCCAACCTCTCAACTTGAGAAATACACGCACAGGTAGACATAG  
TGTAAGTAGATGTCTCACACCAAGACTGAAGACATTTGGCTATCAGTGGT  
AGGTGAATGTGTTTATCAGTGTGGGAGACGTTGAATTATTTTTTCAGAAAG  
ATCAAGTGGCAATAGCTGTGAACTCCACAAAATATAATATTCACACAGTA  
TTTGTCTTCTTTATGAATATCTCAGAGCAGAATCAAGGCATTCAATGAAA  
GTAGCAAAAATACTAAGCTCTGGTTCTTTCAATAACAGGAGAAGCAACTG  
AGGACTCATCCTTTAACTCAACTGGCCTCTATTTCTTTTCTATAAAGTTA  
ACAGTTGGACTAAGTGATTTCTAAGCACCATTTTAACTAATGTTCTGTAT  
GAATTTTAGAAAAGAGTAGTTATCTGGTTATCCAAATCAATGGAGCATTG  
AACCAAGTAACAACCTGAAAGCAAGAACTGCCTTGTCATATCTGAGTGAA  
GTTGAATATTACATGTGGTTTGTAGAATTTCTGAGTCTTACACAGACATT  
TGTCATGCCCTTAATGTTTAACTATTTATATCAGTAATCTATTGACACAA  
TGCTCTCTAATCACTCCAGAACTCGGTGAGTTAAAACAATAAGCATCTAT  
TGTTCCTTAAAGTCTGTAGACCCGCAGGGAAGTTCTGATCTGGGCCAGGT  
TTAGCTGCTCTCAGCTGGATTTGCTTGCGCATCTGCAGTCGCCTGGTGGG  
CCCCAGAGAGTAGATGGTTGGTCTAGGATGGCTTCACTTACATATCTCAC  
AAATCATTACCTGGTGACTGAGTGACACTCAGCCAGAAAGTCTCTTCTTGT  
TTGGGAGAATAGCACAAACTCATTTCTTATGGCAGATGAGAAGGTTCCAA  
GAGATAAAAGACACACAGACAGTTAAAGCAGTTAAAGCATATGCACAAAA  
CTGGCACATGGTCACTTTTACCACATTTCTGGTGGTGAAAAACAAGTTGCAA  
GACAAGTTTCAGATTTGAGGGATGGGGAAAAGGAGACCCCTCTCATGATGAA  
AGAAGCTGCAAAGGTACATTGCAAAGCATGTGGATTTAGGAAGGTGTGGA  
GAATTAGGAACATTTTGATAATCTGACACACTATACTTAGACACTGCCGT  
GGCTGAAAGTATGATCTTTATTTTCTAGTGGTAACAAATGTGTTTCTCTA  
CTTATTTTGTAGTGTTCTGTAAATTTCCATATAGACATTGTCTTCCATCAAT  
TTTTTTTTCCCTATGTAAGCCACTTCACTTACCATCATTCAGTATCATAT  
TTGGCCAAACCTTAATTTGGGGCTAATTAACGTCAACCTAATTATTGTAG  
CATTTACTATCTATTTACTCTTAGACTATTGGTATGGAAGCCTTCATCAT  
TATTATAAATATGTGAATATTATTCCAAAATTGATCCTAATGCAGTTGTT  
ATATAGAAAAAGATAGATATGATCCTTACATTGCCTGGATTCTAAATTTA  
CTAGAGTCACAGTTAATTCTGGAGATATGGGAGATCTGAGATGATATATA  
CTACTTGCTGCTATGCTTTGTATATCATGTAACCTTTTGTAGTCTCAAGT  
AGCTTTTCTACAAAAAAATAAAAGTTTACTTATCTAAAGTGTCTTCTAAC  
CTTAAGTTCTACGGATCACTCATTTTAGGTGGACTCAGTATGCCAACATT  
CCTGAGTCATGTTAGACCCCAATAACTTACTGAAGTCTTAGAGTATATAT  
GCTCTTAAATATTTTGAGTATTCTTAATGTTAAAATAAGTAAAAATGTCC  
AAGTTACCCATGTAGATTGACATCAGCAAGTGGCTTTGACAGAGTTTAGT  
CAGGGACAAGTCTTTAGCTACATCAGATAAAGATAGGTTCAATTCCTTAAA  
AACTTCATCAGTATTTTTTTTCCAATATACTTGTGAAAACACTGAGAATGC  
TTTTCCATACAAAAGTTTTTCTAATAAGTTTGCAATTACTCTCCATTAGTC  
ATGTTCAAATCTTTCTCGTTATCAGTAGTCTCTCTAAATCCAGGTAGAT  
CAGAATGATTAAATGAGAGAAATATTTGAGATCAAACATGGTACTATAA  
CATAATAAATCTTGTCTCATTTTCTATGTCATATGAAAAAAGACTGGTAA  
GTAAAAAATAAGGTAAAATGTTTATTATAGTTCATATATACTGAGCTCCA  
GAAAAATATAATTGACATACAAATGTAGACCATTGATTTCCGTTTTAGAA  
TGAGTTCTGGTGATGGTTACAGGAAAGAGATTTACCTTCTTATTCAACAT  
TTCCATAAGCCTTTTCAAACTTCAAAAAATTTAAAAATACAAGATGAAG  
AAATACATTAGAAATTTTCTAATAGTCAACCACAGAAATATAATATTACC

AACTTAAACCAAACATTATCTCCCTCCTTATTAGAATGTGACACATTTGA  
CCATCAAATACAATTAAAAATATCATTGAAGAGTATAATTTTATATTTTC  
TATTTAAGAAGAAGAAAAATGTAATGCTTGAAATACTGGTAATGAGCAAG  
TGTAAAACTGAAAAGTAACTAAATATAAGACAAGGCACTTTGGAATAAGC  
AAAGTCTCTAGGATTTTAAGAGCTGGTTAATCCCAAAGCCACTGTTTTTT  
GTTGTTGTCCATGTGTCTAAGAGTTTTTCCAAGTGGCAAAACAGTGACA  
AGGTGCATACGCTTTTTTCATACTTTTTGTTGTTGTATAAAGCTATTTTG  
GTTGACTCCACACAAATAAAGGGAAATAGAAGCTTGAGGCCACCACTGGA  
ATTATTCAAAAATCACAAAGAAAACCCATGTGTTTCATTACACAGCAAT  
TTGGGGTGAATGTGGTTTTTTGGCCAACATTTTCCAGAAAACCACTTAATC  
CTCCAAGTTTTCTTCTAAGTCTAGATACACAACCAGAAATCCCAGCTGAATG  
GATTCACCTTAGTCTGAAGATCCAAACTGGTCCAGGATATGCAGTCCTCAT  
CTTTCTGAAGTCTTGGAGGATCGGAGGAAATTTATGGGTAATATGGAAAT  
AGAAAAAGCTCAATGCCTTTCAAATTCTAGTGTAGTAAGTAATCACAGGC  
TGAATCCTTTCAACCACCCGGGATAGTTACAGCATTCCCTCGACTGTTTTCT  
CATGGAAGTGTGTTTTATGCTAACATACCTGTATGTTAGCCTTTGGAACCA  
GGCTTCCTAGGTTTACATCTAGACTATACTATTCACTAATTGTGGAATCC  
AGTTATTTAAACACTCTCTGGCTCTGTTTCCCCACAAATAACATAAGGAT  
AATAATATATAACTCATAGTGTCTTGTAGCATGAAATAAGATTATGTA  
TACAAAATTGCTTGCTATAGTACCTAGCACATATTAACACTCAATAAAT  
GTCAGCTTTGATATTGTTATTATATCATATCACCATCACCATCATCATCA  
TCATCATCATCATCATCAGTAATACGCAACCAAATACATACAAAAAAGT  
CCAACCGTAAATCTGACATCGACCTTACATATCACATGCTTGTTACTAAT  
AAAGGAATTCTTAGAGAATTCCTAATTGAAGAATTCCTAATATGGGGGAA  
CTGCATTCAACTCTGGGCTCTAATGCTCATCCGTGGCAAATCATTTAA  
GGAGATTGAGAAGCCCATCTTTCAGGCTCATCCTAACCTCTGAAAGCCCC  
ATTCATCCCCTCGTCTCATCAATCAGTATTTATGGAGCACCACATCAGACA  
GTGATGGAATTAAAGGAGGAGAAATGTCCCCTGCTCCAGACAGACTCATC  
ACCCAGGGAGGAGACAGCCATATTCACAAATAATTACCATGCATTAATGC  
ATTGCATTTGCTCTTGGAAGCAGCAGGCCAACAAAGAGGATACTTACAT  
TATGCCTAAGGGGATTGGAGAAGGCTTGACACCGGAAGGGACATGGGGTC  
CCAGTCTTGGAATAACGAAGAAGCCACCAAAGAGAGAAAGGGGAAAAAA  
GGACTCTGCATACAGAGTAGCAGGTACCAAAGGTTATGAAAGTTCTTGA  
CATGTACCAAGGATGCATGTAGTTAGATGCAGTTGAAACAAAAGATACAT  
TCTAGAGATCAAACAAGTAAGCTTGGAGAGGGAATTATGAGAATATATGC  
CCCCTACCTTCTACAGAAAGTAAAAATGAATTAATAATATAGATTATTCA  
GAGATGTCTGAAAAAATGACCAAAAAAAAAAAAAAACTTGCTTAGACG  
ACAGTACATTTTACTTGCTCTTGGAATCTCCCTGTGAGTACCTTCTTT  
CCTTCTTTTTTTGTTTAATGGACCAAAGGAAACGAAATAATATTTATTG  
TGTCTCTTGCAATTTGCTCCTTAGGAAAATGGCATTAGCCTCATATGGAAA  
CACTTTGACAGGCCCCTGAAAAATAATCCTTAACCACAAACATGTCTTCT  
ACTTGTCTGATCTCAAATTGTTCCAAGTGAGTATCACAAATTCAGGTCAG  
GTTTAAGGATATGACAGGCACTATCAGTCCATTAAATATGAATGATATAT  
GAGGTAGAGGGCGGAGGTGTTGGCACAGAAGGAAAGACTGCTGGTGGGAG  
CCCCATTCCAGGTTCTGTAGAGTGTCTGCCTCCCTAGGAACCTTCCAGTT  
CCACCTGAAGACACTTACTGGCAGCTCCTCAGCACAGATGAAGGGAGGAA  
CAATGGAACCTTCTCTGTGTTTCATCACCAGATAACCATCTCAGTACCTCAG  
TGGAGCATGATTATTGGAAGCAAAATAACACAGATAGGATTTTACATTCA  
AGCTTTGGAAATGAGAAATAACAAAGATGCGAGGACACAAACAACCCCTCT  
CACTGCCCTCCACCCCTCTTTACCCCTGCATCCACCTCCTTGTTGCTC  
TTTTTGCTTCCCTACTTCTAATTGGCAGATACTTGATCCACACAGCCATTTA  
TTTCATTTTTCAGAGTGACAGAAGGCCACTTGAGACCTACTGATATGTGTGG  
GAAAGTGACAGCCATGCTACTTGACCTGTTGCGGGGAGCGACCCGTTGC  
CTCTCCCTCCCTTGCTGTGCCATTGTGTGCCACCTTCTTCTGTTTCAGT  
AGCGGCAGAAAAGAAGTCAAAGTAGCCGGCATTTCAGCATGACCACATACA  
AAAAGGAAGCCAGAAAGCTTCTTGTACCTCTTTTCTCCCAAAGCTTGC  
CCAGTGCCCTATTTCAATAGTAAATGTAGCAATCCTATCTCTTTTAGAGC  
TACAGCATGTAAGAATCAAGAATCAGTAAAAAGCAACAGCATAAGCATTT

ATTTGGATGGCCCACTGAGCATTACTGGGATGAATCAGCTACACACACAC  
ACACACACACACACACACACACACACCCTAATTCAAAACCTATTCATAGTC  
TCCCAAGTAGACCATATCTCATACTTTTTGAGCAAGTTAAGTAGACTTGA  
GATCCAAGGCTCTGAGGACTTTTAACTTCCCAGAGAATAAGCTGCAGTAC  
CAATAAACTTTTACAGCAATCTCCTTGGAATGCAGACTAAAATCGGGTAA  
CTCTATATACAGCTCTTAATGACAACACCGAAGAGCACACATTCAAAGGA  
GAGGGGAAAGAAGCTTAGCAGCTACTGTCTTGAACAACCTGTGCAGCAATG  
AAACAAGACCAAATTTTGAAGTTGGATGGCCAACTGTTTAGTTGGTGTC  
TGTTACCATGTGGAGACTATAACTGCTCAATGGTGGTAATAATACATCAT  
AAGACCTGGAAATGGAAAAGACCCATTAAATCATCAAGTAATGCCTTTGC  
CAGCACAGGATGCAGTTCCCAGAGAATATTCTTAAAGTGCCCTTGGGA  
TGAGCTCCAAAGACCATGTCAATTTTATCCATCTCCAAAGAGTGCAATCCA  
GCTATCTACAGTATCCGATTGCTGTTATGAAATTAAACTTTGGCCTTAAA  
AGCATTGTTCCATACCAAACCTAGTCCTTGGTACCAGGTTTTTCATTAAGGA  
CCAGTCATAGCCCTTGGAGGAGGCAGGAAAGGTCATTTTATCCATTCCCC  
TACCTCCGGGCAGGTCTTGTGTGAAATGACACCAGCCTGGCTCTTATTAT  
AAAATTCCCAGAGCAGGAAGTTCTATAGCCCCTGTTGTAATGTGCTTTCC  
CATGACACATAACCCTCATGTAGAGAGTGTTTTCTACAGTCTAGTCGAAA  
TCTCTCCCACCACAGTTTTAAAAACACGTTCCCACAGTAGCAGAGAACTAT  
CTATCACCTGCAATGTGGTGTGTTACCTGAGAAGAAGACGGCCGTTTTCA  
TAGCGCTTCCTTTGCTTGAGACTTGATTTTAGCTACGGTTTTTCATATCTG  
AGTTTACCGAACAAAAGGTGATAGGGACTTCTGGAAGGCAAGGCTTGTT  
CTTTTCCTCTTAGTAACCTTTTTGGATTTTGATTAGTTATAAAAATAAAGT  
GACACTCTGTGGACTCAAACAGTTAATTCAGATTTTGGTGCATGTGATGC  
AAACCCATTTAATGCTTCATTTTCATATTTTCATTATATCAAAGA  
ATTACAGATTTACTAATCAATTACATGCATAAAATCTGGAATCCAAACC  
TAGCAATGTTAAATATTCATGAAGTAATATGCTAATTACGCATCATTAT  
TATTTATTTTTTCTCTTACTTAAAATAGATATGATTGGACCTTTATTGGC  
AATCTCTTATTCTACTTTTTAAATTAAGTAAAGTAATTGAAAGTCATGAA  
ATAGCATGTCTCTGCACTTTTACAAAAATGGCGATTGTTTTTTATTACCT  
CTAACTGCTCTTTTTCAAATTTGTCCAGAGTAATGAAGCATCAACCATCT  
TTCAATAAGAAATCTGGAAATCGATAACCTGAGTTTATGCTTCTGACGAC  
TTCTTATCCGGCTTTTGATCATCTGGTGAGTCTATGTTAACAACAAAAT  
ACTTCAAGGAAGGAAATCAGAATTGATTATCTTCATGATATTCTTGTTTC  
TCATTTTCGAGAAAACAAAGTTTACAAGAATAATTTTAATTTTATACTAA  
AATGTATTAGTCTTCATGTTAATAGAACATTTTCTAAGACATATTATATT  
GATTAAATGAAGCCAAGTAAATGATAAAATGTATGATGTAGTCATTTGTA  
TTTAATGTTTTATTGCAAATTTTTGGTAAACTTGAAAGTATTAAATTTTA  
GTGTGGAAAAGAGGGATCTAGTGCTTTTTTATATTTTAAATTTTAAAAAT  
TAAAAATTTGTTTTGTTTTGTTTTGAGCTAGTGCTTTTTACAACACATA  
CATCTTTGTCTTTCCCGTACTTTGTCTGTGTTAAAGAGAGAGAAGGGACA  
TTTTCTTGAAGCTAGAAAGAAGTATTCTAATGATCATTTCCAATGTGAATT  
TTCTAACGGAGTTGTCAAATCAGAATTACTTCACATCTAGGAAAGTTTAA  
CCTTATGAAAATTCTTAAGGAATGCATACCTTAACTCAAAGTGGGTCATA  
ATCTTAAGTATTTTTATTTTTCATCCAAGAATGCAATGCTTCTGTAAGGTC  
ACAATGCCCATATATAAAAACAATGGTATAGGTATCATGCTTATACCTCAC  
ATAACATTTTAGGAGACCTTCCTTTTCAAGTCTCTGCCTCCAAAGACAGA  
CATATTTTTTTGTGGATTTCTGAACTCAGCCAATATTGTTGGGAAAATAC  
TTCTGCACACCAACAAGAAGTAAACATTTTATTGAGTGCTTACCATGT  
GCTAAACACTCCACATGCATCATATTATTTGATTTTTCATAATCACCTGT  
GAAGTAGACACTCCGTGATTTCCATTTTGCAGGTGAGGTTACCAAGGT  
TAAGTATCTTGCCCAAGGTCACACAGCTGGTAAGTAGTATGGCCAGGATT  
TAAACCTGACAGTTCATCTACAGAGCCTCGGACTGTGTTCTAACCAGGCT  
TTGCACATGAATCTCTTGAAGTATCACTTTTATGTCACTCCGCTTTCTTG  
TGCCCAACAGATTCAACAGCTTGGAATCATTAGAAAAATAAAAGCACACA  
GAAAAGCAAATCAAAGAGATCTGAAATAAAAAACAGTATTTTAAATACCT  
CTTTCAATCTCATGATCAGTAAGAATGAGTAAATTAATCCTCCGTTTG  
ATTTGTTTTCTTTGTTTAAAAACTGGAAGACGCCCTAACTGCCTTGCTA

ATTCTGACCTCATCAACGTTCTGTGACATCGAAGAACAAATGAAAATGAG  
ACTGGCCTCTCATGACATTTAAATATGCCATGGCCACTTCTAGGAAAGTT  
TCTAAGTCTCCTATCCCGCAAATAGAGCGAATTTAAGTACAGAAGGAAAG  
AAAATAAAACAATCAGAAAATAATTATAGGCATACCATTTTCAATAAAAG  
CGATTTTAAAATTTTTATTTAAAGATCTTGTTGCTTTTGTTCATCACGG  
ATCATTGCACATAAACCATAAACAGGAACGACTCCATGAGAACGAATTAT  
TGCATTTTCAGGACTCAGCTGAATATTGAAATGAAGAGCTTCTGCATTTA  
CTTTAAAGGATTTTTTAAAGAGCACATAACTGTTACTAGATATGATGAGG  
TATTTTCGTGACACAGGAAGTAATTTATTTGACACAACCTGGCAGTTTTAACT  
GACTTTAGAAAGCTTGCTTCTCTGTGGTCAGGCGCTCATTGCTAAGAGCA  
AACGGATGAGCTTCAAAGCATTGGTTTGGACCATTGGAAACAGATAATCA  
ACAGATGATGGAGAGAAGTGTGGCCCCCTTTTGGGTTTTTTTTTTTTTCC  
TTCCAGTTCCTTCTTGTCAAAGGATGATTGATATGTGTGGAGCAGCCCTTC  
AAACGCCAGCCACTGCCTGAGGCACTTCCTATAATCAAAGCACACGCCCA  
CCCAGAGCTAATTAGACATTAGATTAGTGTCAACTGATTGATTTAAAGCA  
GCCGGCCCCCTCTTCCCCACCCCTCCCCTCGCCCCAGCAGGGTTGAGGATGG  
GGCTGGTCTCCAAAATGGCTCTCTCTCCAGACAGGCAAATTTATTCATGGA  
AGCTCCAGGAAGGAAACCTAGAGATAATACAATGTGGCTAAAAACACGAC  
CAGAAGAACCTGTCTAGAAGGAAAGTGAGAGGGAGGAGAGAGAAGGAG  
GAACAGAGAGAAAAAGAGAATGAATCATGTTTCCCAGAGCAATGAAACCC  
CTTGGTCCAATTTGTTGAGTTAAGTTAGAGAGAGTGTGTGTGATGTTTGA  
AAGAAAATTATTTGCAATTTAACCTAGGAGAGTTCTGAGTACATTTGGCT  
ACAATTTAGATACCATTTTTTCAAAGTCTTTTCCTTTTCATTTTTCCCCCCC  
TTTATAAATATATGAGCCGGGAACATTCAAAGTTGTCTTAATGGATTAAG  
CAGAGACAAGGCTGCAAGGAGCAAATTAATAAGTAAAGTAGTTACAGCTGT  
TGGAACCTGGCATTGGGCAGAGAGAGAGGTAAAAAGATTTCTCTTCTTAC  
AGGATAAGGGAGATTTTCAGGAAAACACTGAGCCCTTGCCGGGTTTCAGATG  
CGCACGCCTGCAAAACAGTGAGTGATTCCTTGACTTCTTAGCAACTGCAC  
AGCTCTGCTGCTGCTTGTCTCCGTGGAGGAGCCCCAAATAGCTGGAGTTTCAG  
CTAAAAAGTGAGCCCATTTCCAGAAGAGACCACCAGAGTAGGGGGCAGCC  
AGGGGCCAGTTTTAGACTTTTCATTTGCAGATTAAAGGCCTTTTCCACTT  
GTCACGTCCTGCTACTATTGCACTCTGGGGTCAGGACTGATCCAACACAA  
ACACACCTCTGGAATTATTTCTGTGAATATGGGACCCTGAGAAGTGCTGT  
AATGGCAGCAGAAACGTGTGAGACAGATAGTACTTGCTAATGGAACCTCA  
AAAGCTTTCATAGAAGGACGTGATGTCGTGGGTGGGAGAGGGGAGAGGGC  
CAGAGAAAAGGAAGAGGGAACAGCTAATGATCTGGGGGGAGGCAGGTAGA  
AGGTGAGAAGAACGGTGATGGCCAAGTGATTGAAATGACATTCCAGTTAG  
CCATGACGTCTGATATTTTAAATGTCGGTATAGCTTACCAGGCTATGTGT  
GTGTGTGTGTGTGTGTGTGTGAATTTATATATATAAATATATATATAA  
TCTATTATGAGACTTAGAGTCAGAGACACAGACAGAGGGAGAAGCAGGG  
AACCTAATGCGGGACTCGATCCCAAGACCCAGGATCATGACCTGAGCTGC  
GGGCAGATGCTCAAGCACTGAGCCACCCAGGCGTCCCTCCAGGCTGTATA  
TATTATTTCACTGATTTTCTACAAATCCCTGGAAGATAGATAGGGCATGT  
GTCATTATGAATTTACAGACTAGATACGTACCCATTACAGATGAAATGA  
TTAAGACAAGTAATTTTTCCCTCACATTAGTAGGAAAAGTCAGTGAACCTG  
GTATCAGATAAGCCCTTATCAACGTGTCATACTCCCTCCAACCTTCTGTC  
TTGCTTTTTTTTTTTTTTTTTTTAAGATTGTGTTTATTTACTCATGAGAGA  
CTCGCAGAGAGAGGCAGACAGGCAGAGGGAGAAGCAGGCTCCCTGCAG  
GGAGCCCAATGTGGGACTCGATCCTGTGACCCTGGGATCGCGTTCTGAGC  
CAAAGGCAGATGCTCAACCACCTGAACCACCCAGGCATCCCCAACCTTCT  
GTCTTAATGGCATTTACACATATACATATAGTTCTTATTATTTTAATATTT  
AGATACCTAGTCCATTTGCATGTTTTCTAAGACTTTAGGACCCATCCTTC  
TTAGCTCAAGAAATGAACCAGACCATAATCCAGAAATCTGGGAGGTCATT  
AGGGAGGATCTACAGGGTCCGGAAGAGGAAATGCTGAATCTTGGATTAAA  
TATGAGAATAATAACTCAGGGTTTTTTTTCTATGAGAAGACTAAGGACCCA  
AGTTAACTTCCGACTGGTTCCCCAAAAGAACAGTCTTTTGGTTCCCACCA  
AAGAGTAAAGATGCAGGGAAGTGGTCATTGAAAATTGAACACTGCACTCC  
AAAATATGTTGTGAAAACCTGACGGAAGTTTCTGGAGTCCAAAAAGCAATC

AGGCACCAGAGCAGAATGGAATTACTGCTTTATATTTCTTGTGTATGGGT  
CTCAGCATCATAATGACAGCTTTCAAGGACTACTTAGGTTGAAATATGAA  
GCCACTAAGGCCAAGAGTGGGTAAAGTCTGGACAATTCCATCCACGTCAC  
TGTTTCCCCCTGGCTCTCTTGTCTCCCTGTGGAGACAGGAATTCAGAGAA  
CACAATCGGAGAGCCAAAAGGGGAGAGGCGTACGGGAGAGTCCTCCAAAT  
GCCGATTTCGGCAAATTTTAACTTTTGCAGCTATAAACCTTTCAATACCTC  
AAAATAAATCCTTCAGTTTTATATGAGATTTTGGTTTCTGCAGCTGTAGA  
TTTATGCAGTGTGCTCAGGCCAGGCCAAGAGAAGTGAACACAAGTGATGT  
AACAGATAACATAAGGATGTTATTCAGCTTTTCACTATACAGCACTGCTC  
ACTTAGGAACCTTTCCAAATGTCATGTGTAGCCCCCTCATTAATTAGCTG  
CTAAAGCAGCTGATCTTTTGCCATGGATGCGTGTCTCCAGCTGCTGGCCT  
TCGGCTTGCGAGACACAGGAAGCAATGCACTTCCTCGCCCCGGCCTGGAT  
CTGAGACTGTCAGACAGGGAAAATCAGCCAGCGGCATCACTGGGGCAGACT  
AATCTGTCCATTGCTGGTCTGCCCTCTTTTGTGTGCCAAGTTGTGTGCCT  
TGGTTGCTGGTGAGAAGTGGATTACTGAAACGTAATGTGCTTCTAGAGCC  
AACTATATTCACTAGGAAAAATTTTAAAGACAGGTCAACCACATAAGCAGC  
CAGGAGCTTTTGATAATAAGACCACGCATAAGGCAAGAACAGACCTATTA  
CTGTATTGCCTTTATTGACTTTCTTGAGAATAAATTGACTAATATTTTAT  
GAAAAATTATTATGAATCAGGCTCTATGCTATTTTTCTACAAATATCTTA  
GTTAATCCTCATGATGACTGCAAAGTAGATAATATCAATTTCACTCTACA  
GAGGAAGAAACCAGGGTGGAGGGGGTTAGATGCCTTACCTAAAAGTCATC  
CAGGTAGATGCTTGAGGAACCTGTCTCCATTTTCTCAACACCATATGG  
AGTTGCTAATTCCTCCAAAAATAGCAATGTGTAAAAAGAAAGAGGAGACT  
GTCTTCTAGCTAAAATTATGGAGAGAGACCTACATCACTGCTCTTCCATG  
AGAACTGCAAAGGTTTTATCATTATAGCATCACCTGTATGCGAGAAGAAT  
GGGTTTTGTTAACAATGACTGAAACCATGGTTTTTTACATTAGTTTTAAT  
TTTACCAGAGTTTTACCTGTGTGAGTTCTACTTCTGGCCAAGATCGAGTA  
AAACGGTCTATACCCTCCCATCCAACAAGCTCTCAAAGCAAGACAAA  
AATGCATGAGACAATGGTTTTGAAGATACTGGACATCAGTCCATGAAGGA  
CAGTGAAACCCACGAAAAAGGAAACAGCAATGTGAGTCCTGTGATTTACT  
CATCTCATTGACCAGGTGCAGAGCAGGGAGGGGTACCCAGGTGGTACCCA  
GGGGTACCCAGCTTAGCAGTCTCCTGGAGTCAAGGAACCAGAAATGGTTG  
TCTGGGAGGGTCAAAGCAGTGAGAGCTTGAGAGCAGGGCCCTTAAGAGG  
ATAGTGATGTACTGAGCAGAGAGCTCCAGGGATTAGAAATCTTCACTGA  
TCATTGCATATATTGGGGAACTGTCTGAAGCTGAGAAAAGAAACACCTC  
CAAGACTTAGAAGAAACAATTTCTAGACCTCACCAGGGCCCCGGAATAGT  
TCTTGTTCCCACCAGCCAGAAGGCAACCCTGGCCATTCACGAATCCTCAG  
GTACAGAAGCAGGGCAAGATCAACTCTGAAATACATGCTGCTTTGTTCTT  
GCCTAATGAACTTGAAAGCATGACCCTACAGCACCTAACTGTTCCAAAT  
GACTGCATTCCAGAACATTTTCTTGTATTAGGTCTCTGGTGATTTCTTTT  
CCTCAACATATCTTTGGATGAACAAGAACAGCTTTGTGAGAATGAAGCTG  
CTGCCAGGATATACTTGCAGAGAACTTGTGACCACGACAGAAGTCCAAGT  
TTTGTCTCTTGTCCCAAGTTTTTCATATACAGCACAAAGCATTACTCTTGA  
CTCCAGTTCTCTTTAGTATTCTCCAGAAAGTACCCTCCCTGCCTTCTGT  
TGGGATAAGGATAGGAATGTGGTGAGAGAAGGTTGGGAACCAGATTTTAG  
TTTTTTACGCCTTATTCTTCACTTCTGCCTTGCTGAATGCCCCCTTTGCC  
AAGTACCTGAAATTTACTGTGTTTTAAATTATTTTTTTTTTTTTTTTTT  
TTTTTTATTTATGATGGTCACACAGAGAGAGAGAGAGAGGCAGAGACACA  
GGCAGAGGGAGAAGCAGGCTCCATGCACCGGGAGCCCGACGTGGGATTCTG  
ATCCCGGGTCTCCAGGATCGCGCCCTTGGCCAAGGCAGGCGCCAAACCG  
CTGCGCCACCCAGGGATCCCTTTACTGTGTTTTATTAGCACAAATCAGCT  
CATTTTTTATTAATATCTTAATTTATAGGCCCATGGTTTTTCAGCTCCCTG  
CTCTCTGTTATACCATTTATCAAACCTGGTTACCCACTTTCTATTAACCTA  
ACTTTTGAAGAAATTTCTAGTTCATTCTGTTACCTTTCTTAGCTTTTTTA  
AAACTAGAGCTTCCTTTGAAATTATTTTACTGCCATGTGAGCAGGGCTTG  
AAGAGAAACACATGTGTGTTGCATTACACATATTCAAATGCATGTTTGA  
CAATTTTTTAGCTAGAAGTTCCAGGGAATTTCTTCTAAACTGCACATGAGC  
AGCCTACACTGAAATCTGATGAACTGGGCTCCCCTCTTGCTTTTTTTGTTT

ACTATCTTATTCTACCAATAAGAAAGCTCAGGTGTAAAATGATTCCATAA  
GTTGTTCAAGGTCACAAAATCATACGAGTTGTAACGAGAATTAAATAAGG  
TAAAGCACTTAGCATGGTTATGGCCTTATCATTGCCGAGTAGAAAAAGTT  
GTTTTTCATGATTAAGCATCTGGTCCTTATTGATTCTCCAACCTCTGAAT  
ACACTATAGGTAAGTCTGTAGGAAAATGGAAAAGATAGAAAGGTATATGA  
AGGGATAGGACATAATATGCTCAACCAGGGAATAGTGACATCCCAGAGGA  
AGTGACAATCATTTTTATAAGCTCAGGTGTAGGGCTTACATTTGTTTGATT  
TTTGGATTTTTTTTTTTTTAGCTTTGTAAGCAGCTATGAAGCCAAAATATG  
TTGGTAGTACAATGACAACTCTAGTAACCTCTTTCACAGAGTAGATTGAA  
TCATTCTTTATAATGTGAGAAAAATAAAGTATAAACTTTCAGGAATTTTC  
TTGGTAAAGTATCTTTAGTGTAATGTTACATTCAATTCATTTTTCTG  
AATCCCTTAAATATGTTACTTTTTCTATTTTTATTTTCTTGTGTTTCCAAGT  
AACTTTTTTAAAGTTTCTGCCTCCTGCTATGAAGACAGGAATAACTAGTGC  
CAGACAATAACCAACTCAGAACTGGACAAAATATATGAAACGACAGATT  
TTAGACACTGGGCAACAGGTATTATAGGACTGTGATCCCTGCAAGAAGGG  
AAACAGATAAGGTAAACCTTATGATCACCTGACTTTCTGCTTGGAGGCA  
ATTTTGGAAATCATGATGTAAGAAGGGAAGAAAAGCAGGACCCGGTGGTCT  
CCTTGAGCTGAAAAGACAAAAGATCAGAGTTGGAAGAGGCTGAGGTGGTTG  
GAATTTGTGCTTCTGAGTACTAGAAAGGAGAGATCTACAACAGAAAGAGT  
CTCAGGAATCTGCAGAAGGGTCTTCTCATGGCTTTAGTTACGTGGTTAGA  
AGAAGACTCCACGAAGCTAACCAAGGAAAAATGAATGGAGATAAGACTAC  
TTATGGGAAGCTCTCTGGAGGAAAATAATTATATTACATATATCTGAAAA  
AAGAGTTTTATTCAAAATATATAAAGAACACTTACAACCTCAGTAATAAGA  
TACACACACCAATTA AAAATGGGCAAATTATTTGAATAGCTAATTCACAA  
AAAAGCATGAATGACTGATAAGCATATATAAACTGCTTATTAGAAATAA  
TGGAAATGCAAATTA AAACCATACAAAATAAAGGAGTGTTTTACTGTTAT  
TAACACATACCCACTAGAATGACTAAAATCTAAAAGACTGACAATAGGGA  
TGCTTGATGGCTCAGTGGTTGAGCGTCTGTCTGCCTTTGGCACAGGGCG  
TGATCCCAGGGTCCCAGGATCGACTCCCACATCAGGCTCCCAGAAAAGCC  
TGCTTCTCCCTCTGCCTATGTCTCCTCCTCTCTCTGTCTCTCATGAAT  
AAATAAATGAAACCTTAAAAAAAAGACAGACAATAGCAAGTGTTGCAAA  
GATTTGGAGCAAATAAACTGTACATACATGATTGGTGGGAGTATAAGGTC  
ATTTTGCAAAACAGATGAGGAGTTTCCTGTAAATTTAAGCATATACCTAA  
TTAGTGATCCGAGAATTCCACTTCTAAATATTTATCCAAGAGAAGTGAAA  
ATGTAAGTCCACAAAAGATGCATGCATGAATGTTTATAGCAGCTTTCTT  
CACAATAGCACCAAAAAGGAAACAACACAAATGTACATCAGTGGGTAAAA  
AAATAAGTTGTTATATATTCATAAATGAAATAAACTCGGCAATTTAAAAT  
GAACAAGCTACTGTCAAGAGCAAGGGTGGATCTCAAAATTTCTATGCT  
AAGTGAAAGAAATAAGACACAAAAGAATATATACTATATAAGTCTGTTTA  
GATGAAATTTCTAGAATAAGCAAAATTAATCTATCATATAGAAATCAGATC  
AATATTTGTTTGGAGAAGAATTGGCTGGGAAGGGACATAAGGAAATTTTC  
TGGGATAGATGAAAATGTTCTATATGTATTGATTGGGTGATATTTACAT  
GAATATAGAAATTCATCAAACTCATCAGACATTAACGTTACCTTTCAGA  
TAACATTTGATTTCTGTCTGCTTAGCTCAGATTATTTTTTAAATATTTAGGG  
GCACCTGGCTGACAGGGTCAGTGGAACATGCAACTCTTGATCTTGGGATA  
TAAGTTCAAGCCCCACATTAGGTACAGAGATTATTGAAGAAGAAGAAGAA  
GAAGAAGAAGAAGGAGAAGGAGAAGGAGAAGGAGAAGGAGAAGGAGAAGG  
AGAAGGAGAAGGAGAAGAAGAAGAAGAAGAAGAAGGAGAAGGAGAAGAAG  
AAGAAAACTTTAAAAAATTATTTGTAAATGTTTAATTGCAAACATTTCC  
ACCTACGGAGCCAAACTTAAAAAAGATATAAAAAACTTCAGTGGAAAAA  
TCAGTACAATTTATTGCATTTATATATAAATCAACAATGGTTATTTTAAA  
TATGCACATTAATAACTCTTCTCCAACCATGAGTGATCCGAATTCCTTAGA  
GAAACACAGGGGAGAGCTTTGGGGCACAATTAAGAACACTCCTTTGGCAG  
AGGAAGAAGATTATGATGGGAATTAGCAATCAGGTAGGATATATCCCCAA  
ATCGACTTCTAAATCTAAGGGATCAATGAGGAGTAAGGATCAGGCAACTA  
TCTCATGATTAGAAGTATCAAAAGTGAGATCAGAAATGAAGCATGTGCGT  
CAAAAAGGAAGTAAGGTAAGAAATAGAGGAGATCGTGCTGATGCAGGCC  
CAAGGGAAGAAATACCATTGGTTCTTCATAATAGAACAGACAGTATCATG

ATTAGACTTATAGGTACAAACAAGGTAATGCTATAGTATCATAACCACCA  
GCAGAAAATGCCAAAGGACCCTGATTATCCTACTATATGTACTGGTGTCT  
CCTTTTTTAAACAGACTCAAGTTATCCTGTTTCCTCAAACATTTTGTCT  
ACTCAAAGGTTAGTCATCCCCGATTGCAGATCCAGAAAATACCCCGAAT  
ATTTCTTCTTTACTGCAAGATCATTTTATAGAGTAGAGGCCTGAGATCACT  
GTCAGTGTAAACAGTAGGAGTCTACACAAAGTTTGGTGTGAATTACTGGT  
GACATATGTTATGCTAAATGATGGGCTATTTATTACTGAGAGCAGTACAT  
GAGACTACAGTGTGAGTGCTAATCAGTCTAAACATTTTCTTTAGCTATGA  
CTTTCCATTCAAAGGAAACATTTTTTTTTTTTTTAAGGGCACGGATCATT  
ACATTTCAATACCCCAAGCTTAGATCTGGCACCTTACAGAAATTTTTTCAG  
AAGAAAGGCACACAATCCAAGTACTATCTTAATTACCTGCATCAGCCCA  
ATTAATTTGTGGTGTATTTCAAGCTGAAACAAAGGCCCAGGAATGAATCT  
TGCTGTCCCAGCCAGAGGATTCTATGAAGCCTCTCCCTCAGTCATTCCAA  
GGAAGAAAGACAATAGGATGTAGTTGAGCCCTCAGGGGCTTGGCTGCCAA  
AAGAAGTGGAGAGGAAGCTTTGCCAGAGCTCATATCAGTGTGGAAAATCA  
CATCACAACCAGCTACAGTGAAGAATTCTTGAGAATGGAAGGAACAGACT  
GTAAAACATCTGATAAAAGCAAAATGTAAACTTGTCTGAGGATGGGT  
TTACTGCCTGAATCAACAGATGTATAAAATTTATAAACTCCTCAGAGAGC  
TTTACTAGCCTCTTGATGGTATACGGTTCCTTTTCCCTCTATAAGTAAGT  
ATCACAGGTGTGCTTAAAGCTGGATTCTGGGAGGATCCTCTGACAATCA  
GGAAACACCTACCATCCAGCAGGAAGCAACTGCCTGAGTGTCTTACTCC  
CCAAGCACTTTTCTGTTAAAGCCTTTGCATGTGACCAGAAGTTTGAATCA  
GGCCCGAGCCTGCTGTCTTGAAGCTCTTGCTCTAGTTTGAATTGTTTCT  
ACTGTATAACAGATTAAAGGCTACGTAACAAATCAGTGCTTACGTAGAAT  
AGGTGGAACCCAGGTGGCATGTTTTGTAAGGATGCTAAGAATAACTGTA  
ACCCCAACAATAAAATTTCCACAAATCCATTTGTGATGTCTGCAATT  
CCATCATTTGCAAGTTTATTTCTTTGGGTTCAAATAGAAAAATCAACTAAC  
ATGTAAAAAATAACATGTGGACAGATAATTAGATTATTACTTATTACT  
TATTAGATTATTACTTACTTACTTACTTACTTACTATTACAACCACTTA  
CTATGAATTTTCTATTCTAAGTATTTCCAAGAGAACAAAAGTCTCAAGA  
TTTATATATAAGAAGGCGAAAATATAAACTATTATGCACCAACCAATGG  
AATGAAGCCAGGTGGGAGGAAGGAAATGAGGGCAGATCAGGGTACTAAAG  
ATCTTGGAAGAAAGACATCAAGAAAACAAGAATAGGAAATAAACAGT  
TGCCCAAGACCCATTTTACCTATTTTACAATTCTATAAAATTATCTGACAC  
AGAGAAAGTCCCTGGTTAGTACTCTTAGAGGAATAAAAGCCCATGACGA  
CCTTCTCCAACTACTCTCAAGAAATGACTGAGTGAAATCAGTGAAAAA  
TCATTATGGTCCCTTTGAAAATGATCAAGTGCGGTAGATTTAGGCCATAG  
TGTAGGCCGGTGTGATGACCACCAGCTCATGTGTCAGAGAAAGTATCC  
TTATATTGGAAGTCTGAGTTGGGCCAATTGGGTCTCCTTGGTTTCATGTA  
TGATAATAAATGTTTTACTGTAGAAGAGCCTCAGAGTGGAACATAATA  
AGACATTTCAAACCTGGGGCTCCTGGGTGGCTCAGCGGTTGAGCATCTGC  
CTTCAGCTCAGGGCGTGATCCCATAGTCCAGGATCGAGTCTCACATTAG  
GCTCCCTGCATGGAGCCTGCTTCTCCCTGTCCCTCTGTTTCTGCCTCTCT  
CTCTCTCCCTTTCTATTATTTTCATAAAATAAATAAATAAATAAATA  
AATAAATAAATAAATAAATCTTTAAAAGAAAGACATTTCAAATTAAT  
AAGTAAGACAACTATACATCTGAATCAGGATGCCTACTCTTTCAGGGCTC  
CCGGACCCAAATCCAACATGGGGGTTGGGGTTTCCCCACACACAATATCA  
AGCATTTCTGGACACTAGTGTCCAAGAATTCAACTCAATTCTGACTCTAT  
CTATCCAGACAGCATCAGATTCCAGGGGTTAAGGGTTCAACCCTACAAGA  
CGGTTCCTGATCTCCACTTCAGACTCCAGTCAAGACCCAGCCTGTTAC  
CTGTGCTTCTGACCAACTGGCTACAGATTGGAGGTTCCAATGACCTCCTT  
TTCAAGTTCAATTAATTTTCTAGAGTGGCTCACAGAATCTGGGAAACAT  
TTATGTTAACCAGTTTATTTAAAGGATATGATAGAGGATATGAATCCTCTG  
TTCCATAAGTTTCAACAATCCTATGTTGTGATGAGAGATACACAGGGA  
GAGGTCCCAAGCAAAGGAGTTTCTGTCTTCATGGAGCTTGGGGCTCAGCT  
TAGTGGCAGATGGAAGCTTTCTTGTCTCCAAGCATGGACCCTCTCTGAA  
AAAGGACCAAAAACTGTCTCTTGTCTTTTTATGGAGGTTTCATTACT  
GACTCTGTCATTGGCCATTGGCTGATTTAACCTCCAGGCCCTCTCCCTC

CTGGAGGTCAAGGGTGTGAACTGAGAATTTCAACCCCTCTAATCACATGA  
TTGGTCTTCTTGACAGTCCCCCTGCCCTTGCATGGGGTCCAAAAGTCACC  
TTCATTAATAAAAACACACCCATTTTACATTTATGGTTCTGAAACATTTT  
CAGGGATTGTGGATGAAGACCAAATATACCAGGGAAATACATTTTGTCTCA  
CCTGAATGACCAGATATATATTTCTTACAAACCATCATATTGTACCTACC  
AAGTGCCAAGTGCTATGCTAGTTCCCTACTCTCGATAAAGTCATAATCTGG  
CAATCGATCAACAAGTAAACCAATGAAAAAATATAAGAGAGGAGCTTGA  
ATGCTGGATAAATCTAGAAGAGGGTTCAAACCCATTTTGAAGGAAAGTTC  
CTCACTATCCGCTGCCTTACTACATGTGAGTAAGGCTCAAAAGATGAGGA  
CTTATGCAGATCTTGAGGAGGGTGAATTCTATGGAGAGGGAGTGGCCGTG  
TAGTGCCTCACAGGCATGGAGGCAGGTGGGGGCATCCAGATTGTGCAGT  
GAGTGAGAGGTGAAAGGGTGAAGGCCAGAGAGGAATTTAAATTCCAATAA  
CTTGAAATTAGATATTATTGGTGAAAATGTTTAGCACAGCACCTGGAAAAT  
AATTGGCTCTCAGTAAGTTTTTGTGGGATCTGAAATCACTTTAAAAAAT  
AATTTTAACAATTATCATTGAAAGAACTGACTTTAATTCAAATGCAAAAT  
TTGAGAAATTTTAATATAACGGAATATGGCTTATAGAGGGAGATGCCAGG  
GTCTTTGGTCGTCGGGTCTCACTTATATGCCCTGCTAAGGAATTCATGTG  
AACACGCACTCCTGTTTGTATTTACAGCCCCACCTTATTCCAGAGAGGAT  
TTAAAGTGGCTGTTGTATAGAGATTGGATTGTATTATGAATGCAATTGA  
GTGTAATTGAAGGATTTTAAGCAGGGAATGACATGCTCAGGCATGCATTT  
AAGAAAGATTACTCAGGCAACGCAGAAAATAAATTGTAAGGGGTATAGGG  
AAAGGGACGAGACTTCAGGCAGTTAAGGCAAAATAAAGGCAATTACAATA  
ATCCAAGGGAAAAATGAGGCAGGCCTGAACTAATGCAGTGGCGCTGGGAA  
TGGACAAGGGCCGGGTAGGTTTGAGATGTACTTAAGATTGGACAGATTAA  
TTTCTAAGCTAGTGGACCTAATGATACTTAACGCTATGGGAGTAAACCGA  
GTAGAAGAAATTACTCAGGAAATGTGTCTTGATCAGGAATTTGAATAAGG  
GAGACAAGTGATCTAGACAATTTGCCTGATATTAGAGAGCATTTATAGCG  
TGGAAATATACAGTTTCAAGTACTGTGGATTTACTTTGAATTTCCATTTG  
AATCATCAGCCTAGTTTCTTTTAAGCACAGCCTGATTTCTTGCAAGGCAC  
AAATTCCAGGGATTGTGCTAATTGCCCTTGAAGCTGCTCAGTGCATTTTC  
TTCAAAGGAGAGCTGTTGGTAGCAACACCTCAAGATATAAAAACACATCT  
CACTCTCATGTCTACTTTTTTAGCATGCAGACACTGAGGGAGGTGATTTT  
TCTCTGGAAGGGAAAAACACTTCCAGTTAAAGCAAACACTTTGCATAGG  
AATTTAAAGTCCAATAACTTGATTAGATATTATTGGTGAAAATGTTTAG  
TACAGCACCTGGAGAATAATTGGTTCTCAGTAAGTCTTGTGGCATCTGA  
AACCCTTAAAAAAAAGAATTTTAACAATTATCATGGAAAGAACTGACT  
TTAATTCAAATGCAAAATTTGAGGAATTTTAATATAACAGAATACGGTTT  
ATAGAGAAATTAAGTGGGATAAAAGATTAGTGTGGGGATGAGGATGTAG  
TTTTGTAAATGGAGAGTGATTAAAAGAGATAATAGTGAAAGTTTGGCCAT  
ATGGAAAGTTCATGCTTTCTCTAAGAGTTTCAATAGGGTGTGGAATTG  
CTACCTAAGTGAAAATTTAGGCTATAGAAATATGCACAGCTGAGAGAGAC  
TCTGTTTTAAAATGTATATGTAATGGTAAGGGTTTATCCTAAAAAAGTAA  
AGATGGCTTAAGATTAGGTTATTTGTTAATGTGTTCAAATCGATAGATAA  
CACACACACACAAAAAACAAGCTAAAAAGTAGTCTTGAAAGATACCTAA  
AGACATTTGATAAAATTCAACACTACCCTCCTTCCTCCCTCCCTTCTTC  
CTCCCTCTCTTTCTGCTTTCCATTCTTTCCCTTCCTTCCTTCCTTCCTT  
CCTTCCTTCCTTCTCTTCCTTCCTTCCTTCCTTCCTTCCTTTTTCTC  
ACAGAGCAGAGTTGGTTCCCTGTAGGAATTCAGACTATATCACAAGGACAG  
TAGGAATAGCCTAGGGTTCTGAATAGCAAAGGTTGAGAGAAATGAAGATA  
ATGAGAGAGATTTGGGAGGTAGAATTTGCAATGCTAGCAATTGTTTCGTTG  
TGCCATTGTTTGAGATAGTGAACGTGGGTAGGGTGGGCCCTGCAGGGAGG  
CAGGTTCCCAGGGAAGGGTCAGTATAACATGGTTGGTGGTGAATGCACC  
TTGGCTCTGACTGCCAGGTTCTAACCCATCTTGATCCCTTCGGATGAAT  
CTTTAACTTTAATAATTTTGGCTTTTTTCATTCATAAAATAGTTGATAGT  
AATAGAATCCACCTTGAGAGGATTATCTGAAATTACCTCTCCAGTGTTTT  
GCAGAACATTTGCTAACATGACTAACACTTAGGAGGTATTCTCTAATATC  
ATGATCACTCGTGGTGTTTAGACACATTTATTCCAAAGGATCTGGAAACA  
TCCAGGAGGGGACATTTAAAAGATACTTGGCTATAAGGCCTGGACCTCTG

GAAAGAGACTTAAACCAGATGTAGATAGTATTTGAAACACTTTAAACAGT  
GGGGAAAAGAATGATTATTGAATAAATCGGTGTGGTGACTGGTTAGTCAT  
TAGAGACACAAAATAAAATCCTTCTCATAATCTGAACATATAATGTAAAA  
GGATTAAGTGACTTAATGTAAAGAAAAGGAAGTGTTAAAAATATTACCTTA  
AGAAAATTCCTTTGTAAACCAGAAACACAAAGCAGAAGCTATAAAAGAAAA  
TATAGATGTATTTGAATACATTGAAATTTTTTAAAAATTAAAGCTAAAAC  
CCAAAGTTTTGAAATAAGAACACACTCAAAAAATATAACAAGTAACATGA  
AAGGAAATACATAAAGAGCATCTATAATTAACAAGGAAGAGGCTAACAA  
AGTAGATAAAGCCTATGCTCAGATAATCAACAAAAAAGAAATATGAGAG  
ACTCCTAACTCTGGGAAACGAACAAGGGGTAGTGGAAAGGAAGGTGGGGG  
GGATGGGGTGACTGGGTGACAGGCACTGAGGGGGGCACTTGATGGGATGA  
GCACTGGGTGTTATACTGTATGTTGGCAAATCGAACTTCAATAAAAAATA  
TACAAAAAAGAAGGAATATAAATTAAATCAATGTTGCATATTATTTGC  
CCATTAGACTAACAAAATATCTTAACGTTTTTGAAATTTTAAATGAGAGCTC  
ATTAAGTGTTAGTGAAGGTAAAAGCAAATATGTGCTCTAAAGTAGTAATT  
ACGCAATTCATTTGCCAATAAAATTGTTTTAAAAAATTACAAACACTTTC  
ATATATTTTTTTAAAGGTTCAATTATTTATTAGAAAAGAGAGAGACAGTC  
AGGAAGGGCAGACAGAGAGGGGAGAGAGAACTCAAGCAGACTGTGCTGA  
GCACAAACACCAATGGCGGCCTAGATCTCATAACCCTGAGATCATGACCT  
GAGACCAAGAGTCAAACGCTCAACCAACTGTGCCACCCATGTACCCACA  
GACTCTTTTCATTTTTTAAATTAATATTTATTCTTAACTTTAAAGAGTTG  
CAATATATATAAATATTATATTATATATATTATATATAATATATAATATA  
TAAATATTGATATCTAAAACGCTGTCACCTGTCTACATTTTTTTTTTCATT  
GCAATCTAAATCTAAGAATTATTTGGCAGCCATAATTATTCACTTTTAAA  
GAACAGGCTCTTTAAGATTTAGAACTATACTTAGTTTTATTTATCTTTG  
AATTTATATTTTTATTCTCTTCCTAATGTATTTTATAGTCCTATAATTT  
CATTGATCGTTTTCTGATTTGATCATTTTTTACCCATCACAAAATTTAGT  
TTGAAATTCATAAACCTATTATATTCCTCTGACCATGCATCTTTTCTGG  
AGTGAGTTATGTTTCATAGTTATCAGAGGTATATAATTGAACAGAACTACA  
TACAATATTAAATATTTTATAAATAGCTAGTAAACATACAAAGTAAAATT  
TTAATGCATGTCCTCCTTTGTAGTAGGCAAAATAATAGCTCCTGAAAATG  
TTCTTACTCTACCATCCAAGACCTGTGTTACATGACCTAAAAGTGGAAGA  
CGGACCTGGAAAAGAAAGTCAGAGAGATGAGACAATGGGAGAAAAGTCAA  
GAAAGATTCCAAGCCTGAGAGAGAGATGGTCCAACATTGCAGGAAGTGAA  
GATGGGGAGGCCAGCAAAGGTTCAAATAAGGGTGGACTCCAGAAGCTGAC  
AACTAGTAAGAGAATGGGGACCCCCGTTGTAAAATCTCAAGGTGCTCTGT  
TCTCCCAATAACTGGAACAAGGAAGAGAACAGAGTCTCCAGAGAGGAGAC  
CTACTCTTCTCCTTCAGAACCTGCTTTTTTCATTTTTTTTTTTTTTTTTT  
TTGCCAAATAGGCTGAGCCTTCTCCAGATCCCCAAGTTCTGATTCTTTTT  
GGCTTAAGTATTCTTCAGTTTGTCTCTGTCTCTCACCTTTCACTGTA  
AGGGGTCAGGAGAAACCAAGCCATGCCTTCAATGTTTTCTTAGACATCT  
TTTCAGCTAAATACCCAACCTCATTGCTCACAGGTTTGACCTTCCACAGA  
ACATTGGGATACAAGTACGCCAAGGTCTTTGCCCCCTGGTAATAAAGATC  
TTTTCTCTTTTCCAGTTTATAGTAACATGTTCTCTCACTTCCATTGCAGAC  
CTCTCCAGAGTGTCTACTAGTGAGGACATTTCTACCAGCACTGGGTTTAC  
GATGATGTATGTACTCTCTGACACAGCAGCGGCTTCCCCCATAGGGCTCC  
TCTTTGCCCTCCGAGCCCCCTTTAATGGTCCTAGAAAGGCATCTTGCCG  
CCAAATGAAATGCTCCATCAAGGCATTGTTTGAAGATCAGGAGCAGCTTA  
AAATCGTGAATATGCAACAGAGGGACCTAGGACTTTTCTGACCTCTT  
TCTGTCTCACTAGCCCAGGCGACTCTTTACAGAACACTGATTTAGGCAG  
AGATCTTGCTGCCCTCTTACTAAATGGAATACTTGACACTTCTCTCATTT  
TGGTCAAATTCACTCTGAATTCCATTTTAGGACATCTAGGGTACAGGGAT  
CACATGCTGATTCTCTGGCTGTACTCCAGCTGCATTGATGCAAGATTTTC  
ATGAAAGAAAGAAAGAAAGAAAGAAAGAAAGAAAGAAAGAAAGAAAG  
AAAGAAAGAAAGAAAGAAAGAAAGAAAGAAAGAAAGAAAGAAAGAAAG  
GAAAGAAAGAAAGAAAGAAAGAAAGAAAGAAAGAAAGAAAGAAAGAAAG  
AAAGAAAGAAAGAAAGAAAGAAAGAAAGAAAGAAAGAAAGAAAGAAAG  
AAAGAAAGAAAGAAAGAAAGAAAGAAAGAAAGAAAGAAAGAAAGAAAG

AGATGAGGGCACCTTTGGTGGCTCAGTTGGTTTAAGCATCTGCCTTTGGCTC  
AGGTCATGATCTCAGGGTCTCTGGGATCAAGCCCTGTATGGGCTCCCTGCT  
CAGTGGGGAGTCTGCTTCTCCCTCTCCCTCTGCCTCTGTGTTCTCATGCT  
CTCTCTCTCTCTAAAATAAATATATATATTTTTTAAAGTGTGGAGAATGTAA  
GTTTTGAGATCTTTCAGTAGAAGACAGAACTTCTGAAGCACAGAACATA  
CCAAAGACAAGGTCTGTGGACAAGCCATGCGGAGAAACTAAGGGTCAGAG  
GCACTCTCAGAGTCCACGGAAATGATCCTGAGAACATGTGTGATGGCTGG  
GACACCTGGAACCCGGCCCTGCTTCCCCCACCAGTTAATTGTGTGACTTA  
ATCAGGTCACCTGATCCTCCCGAGTTTCTATTCCCTCTTCCATTGAAAAA  
AGCAAGGATTAGATTAGATGGCTTTTTAAAGATTTTTTTTTTCTACTTCTAA  
ATTCTGTAGTTTTTAATACATTTCAGACATTCTTTCACATGCTCTGACTA  
TAGAAACTCCACCTTCTTTTAATAAATCTATTTACTTGCAGGTGGTTGG  
ACTATTAAGAAAAGCAAATTGTTTTAAATAATGTCTGACTTTTTGACTGGC  
TTGACTCCCCTAACGGGCCATATATATAATTTTTTTTTTCTGGGTAGTGAT  
TTTTTTTTTTTAGGTACATCAATCAAGTAGTCAGCATTTATTGCATGGAGC  
TAATTAACCTTTCAAAATGACATTTTCATTGGTAACATTGGTTGAGATTTG  
AACTCAGATCTCATCAATGAAAAGCAGCTGCACTAATAATCCAAGCCCCT  
AATTCTCCCCGCTTAGCCTCACCGTAAATGTGTGATTAATCGCAGGTTTA  
AGGGAGTTCTCAGTTACTGTGAAAACAAATCATTACCAGAAACTGGCATT  
CCCAATTTATTTTATTTTATTTTATTTTATTTTATTTTATGACTTATACCCTAT  
TCTCCATATTTTCCATATGTTCTGGGTCTTTTTCATCCATTTCAGGACCTT  
GTGGAAAGCTCAGCTCACCCCATCTCCTAACGGGTATGATAAAGAGGAG  
AATGTTATTTTTCTCCCCACTTTCCCATTTCAAAGGATGTAGAAACATGAG  
CACTTTCTAGGAAGAGATGAGCGAACCCTGTCTTTGACAGCAGGACAGCG  
TGAACATAGAGATGAATGCACTTACTCTTCATCTCAGGTCAATACCGCAA  
ACACAAACGTCACCTACCTGTTAGATCCAGACGTGTGAGTGGTTAGGAGC  
CTGGGGATGGGCAGAGGGACCTGATGGTGGCTTCTCTTTACTGAATTCTC  
ATTCACTTTTTTCTTTTTCTATTTTAAAGGGGAAGTTACATAGGGGGACTAG  
ATGAACAGTTTGACCTCTGTTCTCCTGTTTGTGAAACACCAAAAAATTGTT  
AGATGAACTTCACCATTGAGAGTGGAGAGTTGAGGGATATTCTGATTAAATAAA  
CTTTGAGGGTGCTGAGACACTCGTCAAGAACATGGACACCAAGCCGTAG  
GAACTACCCTGGGAATCCAATCAGAAGAGACATGTCTTGCTAAGGTGCAG  
GGACAGAGATGACATTTGGCGCAGTCATATGCAAGCCTGAATCTGAAGTG  
ACAAGGTGCAAGCAGCCTCTGTCACTTGCCCTCTCAAATCTCCAGCTCCAT  
GAAGACCAGAAATTTCCAGCTGAGGACCAGCAAGTAATTAACCTATTTGAC  
ACAATGCACAAGACTCCACAGCAATATCAGATAGACAGGCTAGTGAGTG  
TGTATGTAAGTGTGTGTGTGTGTGTGTGTGTAACATATGCCTTACACACG  
AAAATCTCCCAAGTCCTTGAATATTGTAAGGACACCTTTTCAATGAATAT  
CTACATAAATTGCCTTTATCCTCTCATGAGGAAGGCAAAGACTTCCCTGC  
TTAAAAGGCTGATTTTTTTAGGAGGAACCTTACACTTCTCATGGTCACCGT  
TTCTCCACATTCTTATTCTTACTGAACTTCCCTTTATTTTCATTCTGTCT  
CTGGGAGTTTTCTCTTGTCTCCACCCAATATAAGCCCTGAAAACACATCC  
TCCTTGTCTTGACCTTCCCCCAAATCACCACCCTAAGCCAGTTCTGTAT  
AATGAACACATAAGGAAGTTTGAAGTTTAAACAATGAAACAAGGTAGTTC  
CATCGCAAGATCTCACAGTAACCAATTGAGCAGGTCTTTCATGAAAATT  
CCATTGGCTGATCTCATATCAGGAAATTTCTCACTGGCTGTCTCTTTGCC  
CTGTTTTTACACTTCTTCTTTCTCTCATGGCCAGCCTCCAGTTTCTTCT  
CCCCATGCTGATTTGTTTTCTTCTTCAAAATAGGACAGCCCTCCACCCGCT  
ACCTCCAAGGAAGGAAGACTTGCTATGAAATACCGACTCCCCAGTGTGAA  
TTATAGGAGCACCCTGGGAAGGCAGACCTGCCGACCATTACAGGTCTATTCA  
TGTTTTTGTTTTGTTTTACTTCTCATAGTGATTTTGTGTGTGTGTGTGTGT  
CCTCATACATATTCACACCCTTATGTTCTGTTTCTGTCTCTCATTTCTCTC  
TCTCTCTCTCTCTCTCTCTCTCTCTCTCTCTCTCTCTCTCTCTCTCTCTCT  
ACACCCTTCTCTTTCATTTCACATATTCTCTTTTAAATCCACACATGGGTA  
AACACAGGAAATCAGATGAACTAGTCATAATCCTTACTCTCTCAGTGTCT  
CTGGTCAGAGAAAAAAGAAAGGAAAGAGGAAGATCACAGAGA  
GCAAAAGATGGGAGGGCAAAAGTAGAAGTAGTAAAGAGGAGAAAAA  
GAAAAAGTCTCAGTGTGTTTAAATTGCAGAGGATCAAGGAAACAGTGAA

AGTGAATTCTATGAGTGGCATTACTGCCCTGTGAGCAGTAGCTCCTTGCT  
TTCAGCTCAGCCCTGGATCATCCAGACATGGGGGTAAATGCTGACATAA  
ACCCATGTACACAGCCAGCATGTCCCCATAGAGACGTCACACAGACTCA  
CTCATCCGTATCTGCCTTTTATGTAAGAGCTGCCCCCTCTTCCTCTGCAA  
AAGATGACAGCCGGAGGGGGAGTGAGGTTATTGGGATAAAACACACACAC  
ACACAACACCAATTACTGCCCTTCTTCTATAATTTTTTTTCTCTTTAAC  
TTTATTGAGACGTTGTAACAAATTTAGCTGGTTTTCTGTGCATGAACAAA  
GCATAGCTTTATTTTTATGTTTTTCTTCTTGTCTGGCACAATGACGACC  
AGAAATTGGGACTGCAGAAAGGAGATTGAGAACATAAAGATCAGGGTCCG  
CATGTCTGGGTGAGCAGGAAGCTGTGTCCCAGGAGGTCTTTTCTTATAA  
CATTTCCAGCCTTATAATTCACCCTTCTGAGGTTTAGCAAAGTAGCCAAA  
GTAGCCAAAGACGGGGGTGTTAATACAAGCCAAACCTCAGCCCCTTGCAA  
GGCTCCCTCTGGTGCCTTCAGAGCTCTAGCACAGCTCCTCCACCCTGAGT  
TGCCACCACCCGCTTTTGAACCATGGCTTTGGAGAAGGTCATGCCCACAG  
ACACGTCTTTTCTCTGTGTGTGACCAGCCTCTGCCAACTTGTGGTGAGACC  
TTGCATGCCAAATGTAACCAATTACAGGAGTCCCCATCCTGTGGCTGAAG  
GCATCTGTTTTGTGGGAGTATATTCCCTACATGCTGGGATTAGAGACCACT  
GGGCTCCCCAGGACATCTGGAAGAGAGTCTTCTGGAGCTGGCACTTACC  
CATGGTGCGCTATCCTCTTTGCCTGCCAGTATCTACAGCTGTATCTTTTA  
GACGAAGGCCTGTGAAACCATTAGCCACCCAAAAGAGGCTTCTGGGCCAC  
CCATTATCTGTTATTTCTTTTCATCTCTTGGATACCAGAGCTTTCATGGAA  
ACTGGGACAAAAAAGGGAAAAATGACTGAGTAAACTCAAAAACGAAATTGA  
GGAATAACTTGAAAACGTCTCCAAATTAGAAGGCAACATTTTTTTTCAAG  
CTGATCATGAAAATTTAAAGGACCTATCACATCAGTTCCTCTTGTCTGA  
TTCCCTGATCCTTTTATTATCTCTCATCTGGGTTCTTGTAATCTCTGC  
CAGTGTTTTACCCTCCTTCTCATCCTTCTGTCTTCCAAGTCATCTAGTTA  
TCTTTCTGAAAATAAACATCTAAGAATGTTTTTATCTTTAGTGGCTCTCT  
CTCCTCGAGGGCATAAAATGCAGAATTTTTTAATATATGCCCTTCTCACAT  
ATCGGGATATTTACATTCCCCCACCCTGTTGTGCACATCCATATTAATA  
CTCCACTGCATTGTCTATTATCACTTCTGAAATGTTCTCCTGCTTCTTGT  
ATTAGCAAAGTGCTGCTCCTTCAAAGACCAACCCTTCCGTCATCTGCTC  
TGTAAGATCTTTAAAGCCCTTCAGTAGAGCTACTCCTGCTTCTACTCTGG  
TTTTATCTTCCAGCATGCATACCTCTTTTATAATATGCATCCTGTTGTAA  
ACTCCTGACACTGTAAGTCAATAGTTTGGCTCTTGCAATATAAAATAAAC  
TCAAGGAGAATATAGACCACATTTTGGATCCTAATATAAGACATGGCATA  
TAAAAAGTGTCCAATAAATGTTTGATAAATATCTGATGAAAAAATGAAT  
TAATAAATGAACAAATAGCTCATTGAGTAAACTATGGAAAGTACATTTG  
GTATGGATAATGTAAACAGTGGCTAATCACATAAATCCATGCATTACACA  
TGCATATGAAGAATGACACAATTTATATATAAATTTCTAATATACAAATAT  
ACATAAAAGTCCAACACTTTACATTTTCTTTGGATATATTCATGCAACGT  
GGTTTGGTTTTTTTGTGTTTTGTTTTGTTTTTGTGCTGAAAAATATGT  
CCAAAAGTCTTCTGGAGTCAGGTCTGCCTCTATTTGATTGGTTTGGGTTT  
TTGTTTTTCTTTTTGCCTCTATGATTACTACTTTGGATTCCAGATACCAG  
GTATATCCCCAATTTTTTAGCTGTCATCCCTGGATGTCAGGTGTTTAGGT  
GGACTCTAATTTTTTTTCCACTATTAGGAACCTATGAAATCTTTGGGCTC  
ATTATGCATCCTTGTGCACATATGCATGTTTTTCTTTAAGGTGACACCTG  
AGAAAAATTCGAAGTTATAGGAAATGCACATTGTATGTGCCACTAAATC  
CTACAGTTATTTTACAAGGTAGCTACTTCTATGTACCCTCACTAACATC  
AGACATTCTAAATGATTGTCTTTCTTTCTGCTGTTCTAGGTTCCCATTCG  
GTCCCCACAAAATTCCTCATTGATATAGCCTGGAAAGAAAGTTTCAGATC  
TACCTATCTATCTTTTCTATCCCTTTTTTCTTTCTTTCTTTCTTTCT  
TTCTTTCTTTCTTTCTTTCTTTCTTTCTTTCTTTCTTTCTTTCTTTCT  
TTCTTTCTTTCTTTCTTTCTTTCTTTCTTTCTTTCTTTCTTTCTTTCT  
AGTGTTTATTAAACTTAGTTTTAAGCTTTCCTAATTCATTGCTCATTTTT  
TATTTTCTACCATGTTATTTCTCTTGGATTTCATCTTTCTTATTGCTGA  
TATATATCTTCTTATAATTTCTTCAGAATTTCTTTCAGGAGTTTAACTGTC  
TTATTATTCATATGTGGAAATTAACCTGTTTGCACCTTATGCCTGAATAC  
CTCGGTAAAGAATTATGGACTAAAAGAAATTTTCTTATAGCATTTTTAAAA  
TTTAAATATTGTCTAGCATATAAAATCTCACTGTGTTCTACATTCATATT

GATGAGAACTCATAAGTCAATATGATTCTCCATTTACTGTAGGTAATCTT  
TATTATTTTTCTACTCTGATAGCTTTTAAATTTTCTCTTGATTTTGGAC  
ATTCTAAAATTTAATATATCTTGATGGAACACTGAAGGTCAATAAGTCA  
TTTTAAACTTCTAAATATTTTATATTAGATGGATACATGTTTATATTAG  
ATGAATGATGAAATACTTATTGGATTTTATTCATTTATTTTAAAGATTT  
CATTTATTTATTTATTTATTCATCTTGAGGGATGGGGGTGAGCAGGAGGA  
GGAGCAGAGGGAGGGAGAGGAAAAGAAAAGAATCCCAAGCAGACTCTAC  
ACTAAGTGTGGAGCCCCGACATGGGGCTCTATCTCACTACCCTGAGACCTT  
GACCTGAACTGAAACCAAGAGTTGGATGCTTAACCTAACTGAGCTACCCAG  
GAGCCCCTGAATTTTATTTTAGATTCAATGCCAAAAGACCTAGACTGAGT  
TCTGATTCTAGTTCTATACTGATAGGCTTATGGCTATCATCTGGATTTAA  
AACTTCTCTGGGCATTACTTTTCTCTTTCTTCATATTCGAAATGCAGAGG  
TTATAGAAAAGTATGTCTAAGATCCTTTGCAGTCATAAAAAGGGTGTGCAAT  
GAACTCTAAGACTATAAACTTTAAGACTATAAACTTTAAGAGATTTGATA  
TGGTTCTTTTTTTTATTTCTTAAACAATATCAACCCAGGGGACCTGGGTG  
GCTCAGTTGTTGAGCATCTGCCCTTGGCTCAGGTAGTGATCCGGGAGTCC  
TGGAATCAAGTCCTGCATCTGGCTCCCTGCAGGGAGCTTGCTTCTCCCTC  
TGCTGTGTCTCTGTCTCTCTGTATCTCTCATGAATAAATAAATAAAA  
TCTTAAAAAAAAGATAGTATCAAACCTATACTACCCCAATGATATTCCT  
ACCTGTTATAACTATTTTCATCAAAGTGATTTCCAGAAAATGTAACGTCTCT  
TAACTCCCTACTTTGTGTTTCTTTTATTGCAACTACATTTCTTTCAAAA  
GTATGACATTAAAAATCAGGAGAATACATAAACATAGGAATGTTGTTAAA  
TGTTCCTTTTTAATCTTAGAGCCGAGGAAGAAGGGAGTGGGTCTAGGTCAG  
TGAATTAAAGGAGTCTATATGTGAATACTCTCTCTCTCTATATATATATA  
TATTCTGACTTTTGCCAAAAGAATACTTAAACATTACAAAGGGAATTCT  
AGAAAGCAAAGGTTTCTCTCTCCAAAAGGCATAGGAGCCCTCTGAATTA  
AAGCTTCCGACCTCTGAGTACCAGGCTGCCCGTGATTAAAAACAAATGGA  
ACATGTGCTATGGAGCATAAGTCTACCTGATTTATGGTTTGGAAAATTAA  
GTTACTATTACTTATGGGGCTTGGAAGCAAAGGCCCAATGCAATAGCTAA  
TTGAGAGTAGAGAAGGGGTATATGCTGAAATTGGGAAAATATATTTTAGA  
GAATGGCTGAGTGAAGACATCAGGGTATGTAATTAAATGGCCTTAAAAAA  
AAGTCACACTCTCAACAACCTCTTATATCAAACAATTGGAATGTGTTGGT  
TTTATTAACCTGGTCTTCTGCCATTGGTTCCATCAAGCTGGGTACTACTCG  
AGTTAACCTTCACTGTTGACTGACTCTAGTAAACATATTAAACTCCCAT  
TACCAGGGTAATTCTCCCATAAATAAAGACTCTTTAAATGCAGGCAATT  
ATTAGTTTTTGGTAAGCTACACAAATGCCTTCTAGGTTCTCAATAGTCAT  
AAAAGTGCATTTTGATGAGTTTTTTCGACTCATCAAATAAATTTCCAACA  
AATCCTAGGAAGGAATTTTGTTCATAGGAATCAGGGACCAGGAGGTTT  
TGGCTGTGAAAGTTAACTTTGGAAGACCAGGAGGGAGGGAGACCATGCA  
TTACCACCCTTGCCACCAGTTTTCTTCTCAGTATAAAGCCACTTTCCAAG  
CAGTTCAGGAAGTTGTGGGATATGGAATAAAAAATCAGTTCTTTCTCAG  
AATTGGGCTATAATGATATGAGCAATAAAATTGGTGACATAGTAGAGACT  
TCTTATTTTATAGTGGACAAACATTCCAGATTGCTGTAATTTGTTTGAACA  
GCACTAAAAATCTTTGAAATTGAAGAGTGTGCTGTCTAATCATAAGCAG  
ACCACTTTTACTATCATTGTACTTGGTGACTGAGGAAATATGGATATATG  
CTTATTTAAATACAATGGAGACCTAGTTTACTAATTAGGAGTTATTTTTC  
TAAATGAGACACCAAGAGAATATTTCTCCTACATTTTATCATTTTTTAAA  
ATGCATACACTTAATTGATAGTTGTGGTTCTCATCTGTGGGTAATTTTGC  
CCTCTAGGGAAAATTTGGCAATGTTTGGAGGCATTTTCGGGTTGTCACGTT  
GGGCAGGAGGTTTCTACTAGCACCTAGAGGCTAGAGGCCAGGAATGCTA  
CCAAATTCCTTAAAGTGCAAAGGACAGAATCTCCCTTCCTTCCTCCTCCC  
AAAAAGAATTATTAGCTCGAAATATCAGTAGTGCCAAGGTTGAGAAACC  
CTTATCAAGGAAGACCTTTCACTACTTAGTATGTAGGTCGTTAGCTCCGT  
AAATGATAATCCATGGATACACAAAGCAAATGGTGAGATGACTAATTATT  
ACTCTAAATGGATTCAATTTATGAAAAATTTAATTTACACAAAATTGTTT  
AAGAGTACATTCATTGCTGAAAATGAGCTATAGATATACAGATTTAAACC  
AACCACAAACAATAAACACAAAGCCTCGTGACGACATCACATTTAGAAG  
GGAGGCATCTTTCCAATGCCTGGCCTGGCACTTTGTCCACAGTAAAAGCT

CAAATAATACCTGATGAATGAGCCTTTTAAAAAATCCTTTAGCTATTTAA  
AACATATAAGAATAAGTGTCTTAATAGCTTCTATAGCTCTTTTTTTTAG  
TTTTTAAAATTTTTATTTTGAAGTAATTTAGATTTTTTTTAAATTTAAATT  
CACTTAGCCAACATATAGTACATGACTCATTTTCAGATGTAGTTTTAATAA  
TTCATCAGTTGCATATAACACCCAGGGCTCATCACATCCCATCTATAATT  
TCTTTTTAATAAAGATCTAAAAATGGCCTACATGAGAAAAAAATCATTTCT  
AAAGAAAAATAAATCCTCATCGTTTCCTCATTTAAATAAGGTTAAGTTTCC  
AAGAATGGTTTGGTTTTTAAGGGTGTGGACTTGGTTGAAATAGTAAGTAAA  
TTTCTGAGATACACTGTTTCCAGATACAGAAACCTTCATGTGACCTTCTG  
AGGAATACTCCTCTCCCCAAGCGATGCTGTTCCTAGGACCCTCTTTTCTT  
CATTATGGTAAGAATAAAGTCTTAACCTCAGCTCACCAGCCTGAGGTAAC  
AAAGATGTTTTACACCCACTAATTAGGGGCTGGCAGGTAACCCATCTCAC  
TAATCCCTGAGATGGAAAAACACATGGTTCATAAATTGGTTACACTTCCTG  
CTCCTCTGACTCAGAGATGCTCATAACATCAGCTGCCCATCCACAGGTCTC  
TAACCTTCGAGGTTTGTGGTCAGGAATTTTGAGGAGGGCAAGGAAGCCAG  
AGAAACAGAGGCAAAGAGAAAAGAGATCCAGAGAGACCAGGGGCTAGGGAC  
AGCTGATCTGCCATATAAATTTTCAGACTTTTCCTTGAAAGTGTCTCCTTCT  
AGCGCAGTCACATAAACATGAAGATGGAAATGTTAGGCAAAGAAATACTA  
ATTAAATCTATCTTGATGTATGTAAGCATATATAGAAAAACATGTTTCACA  
CTTTGTTTGTCTATCTTGCTTAAATCAATGACTCCTGACTAGCATAGCTTT  
ATTATAAAGGATTTTTTAAAAGTTTACAAGAAATAGAAGAATTAAATATTA  
GGATAATAAGATCAGGAATGAAAGCTAAGGGTATTGTAACAAAACCTTCTA  
TCTACATTCCTATCTATTTATCTATCTTATCTACTGATCGTGTGTGTCTG  
TGTGTGCACACATATTCTCTATGAGATAGAAGAAAATTATACTAATGTTT  
ATCTCTATGGTCAATGATGGTATTAGTCATATTTTATTTCCAGCAGTCTA  
ACCTGTACTTGGAATAAATTAATGCCTACCTGATGAAAGTTAAGTGTGA  
CTCAAGGGTGACAAATAACTATTGAAAAAAGGCATCGTGCCAACTTCGA  
GAACTTTTAAAAGTGATTTTCAAAAAACAGCTGAACCTGACCTCACTTG  
TGAGCCATGGGATGGAGCACTGGAAAGGTCAATGGGCACCTTATTTATTA  
AACATGAGTAAATAAAAATAAGTCAGGTTGATGCAGTGACATGTTTCAGTTG  
CATAAAAAGTAAGAAATCCAACCTACTGTCTGCTGGTTTAATAAGTTTAA  
TCATAGCAAATGACCCAGTTCATAGATCAACAGTATCAATGATTTTAAAT  
AAAGTCCCTACGTAAGAAAAAAAACATGCTTAACAGAAAAATTTTAAGTAT  
CTTTTCTTACTTCCTGAATTATCTGTGAGAATCTTCAAAGTTAACCCTGT  
CTTCTCCTACCATTGGTGTGGGTGACATCTTAGAAGTAATTTCTTCCTCA  
CTAGGCATCTACAATGAATTTCAATTTCAAGAAAAAATATATCAATCATTT  
CTGGATTCACTGGGTGGGAAGTGGGGCTGGGACTCCATGGCCCTAGAATC  
AGGCAGAGATGAGATCAGGACAAAGAGAAACAGGAACAGGCAACACTCAA  
AGAGCCAGGTGTGATTCTAACTTTTTGACATATTTAATCTCAGAAGAAAC  
TATTTTATTTTATTTTATTTTATTATTTTTTAATTTTTTTAAGAACTCT  
TTTATAAATGTGGTAACAAAGGCATAGCTGCTTAGATAACTCTGCTAAGG  
TCACCCATTTCTAGATTTTGAGGCAGGATTTAAATCCAGATACCTAACCC  
TGGCACTATATTCCTCCCTAAACAGCACCATATCCTTCCTCTGCCCTTTA  
CCCTGATCCTTGTTTCTTTATAGTATTTATCCTCACCTAATGAGTACATT  
TACACGGGCTCATGTATTTGTTGTTTGTGTTATCCTGCTAAATAGGAGGT  
TCCCGACTGTATCAACCATGTCTGTTCCATTTATGGAGGCATCCTCCGGG  
TTCAAACATAGGAGATACTAAATAAGTTGTTGGAATAAATATTGTGTGA  
ACAAATGAATGAATAAATGAATGAATGTGTACTCCACCTAGACTAAGGA  
ACAGAGACTCAAATCACCAAGTCATCAAATTTAAGAATAAGTTCCTAATC  
AAATGTAGGTCCCAACATAAAGGACTGAGGCCCAAGCTTGAGGACATTCC  
CAGGGGCAGCCTTGAGGGTGAGGCCAAAGACGGCGTGTTTCCACCCTGC  
CTGGTGGGAAGCACATGATTCCAAGCCAGTTGTGTCAAGAATGTGTAACA  
CTCCTGCCTGTGTGCCCCATCTCTCCAGTACCCTACCACCTTGAGTTC  
AAGTTCACCTCTCAGCTGTTTTCCAGCACAGCCTATGTACTGAATCATGA  
ATACTCTCTCTGATGAGTTTCCAAGAGGATTGACCAGGACTCAGGTTTCA  
CCCCTTGGCCCCAGATCAAAAAAATTTCCCCTATGAAATCCAAATACCCCA  
AACAAAGGATTGAACCCATGCCTCAGTCCTAATTAGCACCAAAGGTGGCC  
AAAGTCCCCTACTGTGGAGAAGGGAAGTAGAACCGGTGGAAGTTTGCATAA

GTGGAAGTGAAATGTTTCCATAAATGTAAATGAAAACATCTGAGCACAT  
TTACACTTACATGGATAATGATTCTAACTGCTTACTGATGCTGCAAAAAA  
AGAAAACAAAATCAATGTTAGACAAAATAAGATGAAGAGCATCTTCCCTT  
TCCAACATTGTAAATGAAGTGGAACACAAGGGAGAAGTCTTAACAGCAAC  
AGTTAATACAAAGTGCAATAAACCAGACTCGAGGTATGGTCACCTACAA  
AAGTGTATGTGGGAGAGAAGGTGCCAGAATTTGAGGGGCCATGATCATTC  
TCAGCCCTTTATCCCCAAGAAAAGGCGATACTGCAGCTGGAGAGTTTCTC  
ATCCTTCTTTTGGTTTCAGAGTACAGAAGCCTTCATGTATTGTTACCCAC  
GAGGACATATGGAGATCAGGATATATTAAGTGTAGAGACCACATTTGCTT  
ACCTAATACCACTCCCAATCCCAGACCTGAAAGAGCCATGGCAATGGGCA  
TTAGGCAGAGTGGAGCCTGGAGCTCATTCCTCCGTCTACACATCCAGCCA  
TCAACCATTTCAGCAAATGCCCATTTGATCCTCATTCAGTAAGAGGCAGGCA  
TGTCTCCTCACCTGGACTACTACGATGGTATGCGCAGGGTCCTGCCCTT  
AGCACTTTACAATAAAAATGGGAGGAAACAGACCAGTGAAGAATTATGACC  
AAGTTTATAAAAGTAAACATGGAATTGCAAAGGAACCTAAAGGAAGCGCA  
AGATTGCCTGAGTAAAGATTGAAAGCCTTAGAGCCAGAGGTATATATAAA  
ATATATAGATGCTGTAAATATAAATATATAGATCTGAATTCGAAGACACT  
TAGGGCATGAGTGTGTGGTCTGCCACAGTCCCCACCCTGCCTAATCAAC  
CTTCATCTATTGGAGTGGTCATTGCTAATGACAGAGTGACCTCTGATGGA  
ATTTGCTGAGTTCACAGGGGACTGAAGAAGTGATGTCCAAGCTGCCTAAA  
GCTTACCTAAACCTTAGCCATGCTGAAAAGGGGAAGAAAAGAACCTCAGG  
AGAGCAAACCATCCACGAAATGGAGTAGAAGCATAAAATATGAGCAACTAC  
TGGAGAAATCAAAAGTTTCAGTATTTCTGAAAAGGGACGGTAGGTAGGAAG  
CATCTTAAAGAGCCACTAAAATATTTGGAGTGATTTTGAATGAATTTCT  
GAAAAAATTGCTTCATGTCCATTGTTTATAGATCTTAAACAAAATTTTAA  
AAAAAATTTAAATTTAATTTATATTTTCAGTACAGGGTCTGATTCAGGGT  
TACCAATAAAAATATGGTATGCTCAGTTAAATTCACATTTCAAATAATAA  
ATAATTTTTTAATATAAATAAGTCCCACACATTACATGGGACATATACCA  
GGAGAAAAAAAAAAGTCCCAAATATTGCATGGGGTGACCTACAGGAAA  
AACAAAGATGTTGTTGCTTATCTGAAATTCAGAGTTAACTGGACATCCTT  
TATTTTTACTTGCTAATCTGGCAGTGTACTCGAGAGACCCTCAGAGTATT  
CCTGTTTCCGTCACGTAGCTTGCCATTTGACAGACATTCAGATACTTTTA  
GAGAGCCTTGAGTTCTGGTGAGTACACAGGAACCTCTGTTAGCCACACA  
TGTCTTCCTGTTGGGTCCGTAACCCCTTTTCCATCGTCTGATATCACTAT  
TCCATCCCCTCTCTGTCTTGGGCCACACTCCCAGACATCCTAAGAGCA  
GGTTAAGGAGGAGAGTGGGTGGTTGGACAGGTAACCTCTGAGAATCTGGAG  
GCCAAGTGAGAGAGAGTAGGTAGGTAGAGAGAGAATAAAATTGTCAACGAA  
GTATCAACAGCCTGCCAGTGGCCACTCAACAGTGACTATGTGCTTTGATA  
CAAAGGAGAAGGTGTGGCCCCGGGACCATTCAAATGCCATCCATGCTCTG  
ACCTACTGAGGGAAGCCTGCAGAAGAAAGCTGGCTGAGGAGCCCGTTTCT  
GTGGAAGTAACTCAATTGCAGCACAGACAAGGAGCCCCCTCTGGACATATT  
TTACCCAAGTGTAAGCACGTTATTCCTCACAAGCACCCATTATCAACTTC  
GGAATACGATGGCCGGCCACTTACTTCCAAGCACTTGACATTTTTTAAAT  
AATCATTTCCACCTTTTCTTAAATCCAGCCCCCTGATCCTTGCATGAGGG  
TCAGAGGAGCTGTCTGCAGAACAGAGCAAGAAGGAAGTACTCTCAGACC  
CCACCAGAGAATCCAGCTCCATCTTCCAATACAGAATTAAAATTTTAATC  
TGATTTGACATAGCTATTTGGGGAATCCACAGGCTTGTCATGAGTCAGAT  
GATTAAAGTGGAACATAAGGGATTTTGGCCTGTCTTTGTGAAGAAGATAAA  
AAAAAAAAAAGGCGGGAAGAATTTGCTTTGTTTCTCCTTTTATGCATCCC  
ACACAAGAAAAATTTGCTGTGTAGACATTTAGCAATGAGCTTAGTTCTAGTA  
GCCAGGCTGGGAATGAAAAACAGAGAAGATAAAAAATCTTCCTGCACTAA  
GTTGCTAGTGTACATTGCAGTACATTTTACTTAATTGTGTTATTATTTTT  
GTCTTTGTCAACACCAACTTGCTTAAAGGAGCTACAGAAGGAGTGAGAT  
AGAATTACTCGATTTCTTCTAAACCAAAGAGTCCTTGTAAGCCATAACCC  
AATTATGATGAAAGAGCTGGAGATGTAGCTTTATGGATGTGCCACAGGAG  
AAGACGGTACACGTTCTGTGGTTCATTTTGAAGTCCCTGTGATCAAATTC  
GATTCTTACTTATTTTTGTTGTAGAAACCACTTTTGCTGGCCCATCTCTG  
AAAGGCACAGCCAAAGGACTCTGGTTTGCTGGTTTTAGGAGAATGATACT

GAAGGTGGTTGGGTGGGGGCAGACCCTTAAAGTAAAAACCAGGGCAGCAT  
TTCCACCAGGGCAGCATGTCTGTGTGCTACGTGGGGATTTCAGATGGTTT  
CCATCTGTCGTTACAGCCCTGCAGATTCCCTCTCTTCTCTTTAGCTGCTG  
CCAGTGGATTATCCTGTGAGAGCAGGTCCCTTACCTGGGTTTACCACCTT  
CGGTATCTAAATCACCTTTTTTTTGCCTCTGGCCCAAGGGAGCACCAAGGT  
TCAGGGGTGAGAGCACCATGTTCACTCCTTCTAACCTGTCACCACCGGGA  
GACCAGAGTGTGAGGATCCCGTGGGGGAGGCCAGCAGTGGGATTGAGACT  
CACAAGGAGAGAGTCATTCACTTCGTGAACCTCACACAGCGCCTGGAATG  
GGATGGGGGTGGCATTTCCTCCATTCCCTGATGTCACAGAACTGTGTTTTT  
GTTTTTGTTTTTTTTATAGGAGTCCCTCCCACTCTGTGTCTGAGCACTTCAT  
TACCTCTCTTGTGCTGCAGAGGCCCCACAGGCCAACAGAGAGATGTTTGTT  
GTTCCATCCCAGGCACAGAGACTCCCAGGCCTTGCATTTTGACCCTGGGC  
AAATCACATAAAGTCTTGGGACTCCATTTTACCATCTATAAAACAGGAAT  
CCTTCTCCCTGCCCCCTCCCGGCCTCATCGGGTTGTTTCGAGGGCAAGACG  
TTGAGGTCATTGATTTAAAGCATTTCAGAAATAAACTTAATGCAGCTTA  
GGCATTAGTATCCTAACTGGTGCCATCATTCTGATAACAGTATCAACATC  
CATTTATTTTGTGTCAGCAGGTAATTGTGTAATTGCCCCCATGTGCAAGCTC  
TATGCAATAGAGGTCCCTCCCACTTCACACCGACTCTTCCCTCCCCCTGG  
AATGCTTCTCTGCCCTATAGCATCATTGCTAGCTCTCTCTCCTCCTTCAT  
GATTTGCTCAAATGCCATCTTCTCAATGAGGCCTGCTCTGACTCTACTAT  
TCAAAATTACAACTGCCCCACCACCCCCAGCATCCCTGATGCTCCCGGTG  
CTGCTACACATTTTTTCTATGGAATTTATTTCTTCCAACATACTATAAAGT  
CTGTCTCTTATGCTGAATATAATTAAGACTAAAGTAATATATTAAATGA  
CATAACATCATTTATTATGTTTATGATGTAGGGCCTGTCTCTGTTTCATG  
AGGGCAGAGATGTCTGTCACTTTTTTCTATTAAATATCCCAAACCTTGTTT  
AGGAAAGTGCTTGGCACAGAGTGACCTTTTAAAAATATTTGTTAGGGTGC  
ATGGGTGGCTCAGTTGGTTAAGCATCTGCCTTCAGCTCAGGTCATGATCC  
CAGGGTCCCTCATAGGGCTCCCTGCTCAGTGGGGAGCCTGCTTCTCCTTT  
TGTCCCTCCCTGCCCCGCTGTGATCTCTCTCTCTTTCAAAAAACAAAAT  
CCTTAAAAAATTTTAAAAATAAAAGTATTTCGTTAAATTAAGTAATTACT  
TGAAAATAAACCTGTGCATATCTATTGCATATCAACTAGAAAAGCTCCAT  
GCGCCTTCACCTAAAATCCAGCATCAATTAACCTCCTCCTGTCTTTTGTT  
TAGTTTCTCCCTTTTAAATAAACACATTTTCAGCCAATGTGCATTGTCTCA  
GTTGCCCCAGACCAAATACACTACAGGATTGTATAAACTTCCCTTATTCT  
GTTCCCTTTTGCTTAGAATGCCACTTCCCAAAGGTTCTCACTTCAAATCC  
TATTTATCTTTAAAGTTTGAATGCTCTTTCTCTATTAAAGCCCTTCCTGA  
TTTTCAAACAAGGACACGACCTTCCCTCCTCTTAAGTCAGCATGCGACT  
TATGCCCCTGTATGGCATTTCGATTGTATTACAGTTACTTGGGGGTGCT  
ATATTGTTCTCTAGGGCTGTGATGACAAAGCACCAGAGACTGGGTGCTT  
TAAGCAACAGAAATTCATTTTCTTATAATTTTGAGGTCTAGATGTCTGAG  
ATCAAGGTGTTGACAGGGCTGGTTTCTTCTGAGGCTTCTTCTTGCTTCT  
CCTCTCCTTGCTTGTAAAGTGGCTAGCTTCTCTCTGTGTCTTTGCATGGT  
CTTTCCTCTTCTGCATCTGTGTTTCAGATTTCTTGTAAAGGACACAAGTC  
ATATTGGATTAGGGACCACTCTAATGACCTCATTTCAACTTGATCACCTC  
TTTAAAGATCCTGTACCAAATACAGTCACATTATGAGATACCAGAGGTT  
AGGACTTCAGCATATGAATTGGAAGGGAACCAAAATGACCTACAGCAGGT  
GCTTACCCTCAAGCATTCTCAAAGGACCTTAAGACCTGTTCTAGGAGCTG  
TGAACCTCCTTTAAGACAGGTACTCAGTCTTACCATTTTGTGACTCCCAA  
GCAGTCTGTCAAGGTTTTGGATCGCATTCTCATTTTGGATCTCAAAAATT  
GTGGCATGAACCATGTTGTCCCTGTACAATCTCATAGAAACCAGAGTACA  
TGATGGAGACTGTGATGACTCTCTCATTCTCTGCTTCTTAGACTGCCTCT  
CAAACCAACAGGATCTCCTTGAGTTGGCCCCAGTCCCTATCCTTACTTCA  
TTATTTCTGTATCTTTCTCCCAAGATTGCCCTCCTAAGGATTCTTTCCCA  
CTTGAGGAAAGATTTGCCTCTTCAATTGCTTTTTTTTGCAAATGAGGGTAA  
ACTAAAACCTTTCTTCTTGGAATAACTGAGCATCTTCATAGCTCTCACTG  
AGAACAAATTTCTTGTAAACATGCTTATGTGGCAGTAAATAGTGTATGAT  
TAAAAATTAAGGAAAATTGGAGTTACCTGGGTGGCTCAGTCAGTTAAGTG  
TCTGATTTGTGATTTTCAGCTCAGGTCATGATCTTGTGGGTGAGAGATCA

AGTCCTGCGTCAGGCTCCATGCTCAGTGGGACTCTATTGAGAGTCTCTCC  
CTCTGTCTCTCCCCTACTAATGTGCTTGCTCATGTGTGCTCTCTCTTTCT  
CTCTCAAATAAATAAATAAATCTTGTTTTTTTGAATTTGGGAAAATTTCTA  
ACAATGTTATACTAGCTATTCTAAGATAGCTCCTGTCTATTTTGTTTTT  
AATGCTTTTGGACTGAGAGGCACATAATATTCTTGACAACCTGTACTTCAA  
CTATAGAAATTCTAAAGCTTTTTCAAATTGCTAGAATTCTGTGTTCCAAT  
CAACACATGAAATGCTGTTGGCTAATATACAGTTCCAACCTCAGAAGCCA  
TTAGTTGAGAGAACTCTAGAACTTGTGTTAGAAGATTGACAATAAAGAA  
TGCTGTGAGCCTGGAAACATAGTGAATTCCTAATTTTTTCCAGAAAGTCAC  
TAATCTTTAGAGTACAGGTTAAAGATCTTTATATACAAGTCCAGTCTTCA  
ATTAGATTCCCTCATTTATCTTATTTTTTTAATTTTAATTTTTTAATGTTT  
TTAAGTAGGCTCCATGCCCATTGTGGGGCTTGAACTCATGACCCTTAGAT  
TTAGAGTTGCATGCTCTACCAACTGAGCCAGCCAGATACCCCTCAATTA  
GATTCTTGAGTTAGCATTTATGAACTAAACTTTTCATCCCTGATTCTCTGC  
TACTGAAAAGAGCACATGGTCTATCAGCAAGACTGAGGACCACTAAAAGG  
GCTTATTGGTTAAGAAAGTAGACTACTTGGAGTATATGCTTAAGGAAGAA  
TGTTATCAAGCAACTATCTCTGAGGAACTAGAGTGTCCAAAAGCTCTGAA  
ATCGAATAAAATCATCCCTGCAGTAACTTTTAAGAATAAGAGATAGTGTT  
TTCAGGAATTAGATCAAGAAGTTTAAGCTTTAGCCCTGATTCTACTAGAC  
ATTTGCTGAGTGGATTGGGCTAACACACATATCATCTTTGGACTTCTATG  
GCCTCATCTGTAAGGAGAAAAGGGCAAATGAAATGATAATACACCTGGAAG  
CAAGGCTGAGTTGTGAGATTTAGGAGACTCAAACGTCTTCATGAATGTAG  
ATTATTTTTTAAACCTCCCTTCAGTTCAAGAAAACATGCATGGAAAAAA  
AAAACATGCATGGGATAATATCTCAAAAAGTACTTGGATTGTACAAAGAA  
TAAAAGCCAGGAACACAGAACTGCACAATAGCCAGAAAAGAGGTCTTA  
GGATTTGTGTGAGGAGCCATGATCATGAACATTGTTCTCTGATCCTCTTG  
GCGTCTCCACCTGCTGATGTAGACACTTGGACCATTATCAAGAGGTCC  
CATGGTGACAACAGTAAACACCTGCCAAGACACTGTGATGTGAAAGCATG  
TCAATAAAGCAAACATATCCCTTGGGTCACTATGTCACTCCCCAACT  
ATCTTATAAGGCGTAATGTATAAAAAACAATAACTATAAAGATGCTATAG  
AAAACATAGGTCAAGTTCACACAGTAAAAATGATGTAAAGAGGGAAATTG  
ACTATATTTTCAAAAATTTCTCGATAAATGGGGAATTAGTTGTGTAGGGT  
TTAAGCCATCTTGTCTAATAAACCTAGTTTTCTACAAATGTATTTATTC  
CAAAGGAAGAAATCTCCTTAGTACCTCCTTGGCAAATGCCAGGACTGCTG  
ATGTAGCATTGCCTAACAGCCCCCTAGAAAAACCTGCCAGTTGCCATTCCCT  
CATAGGTTGAACATCCCTTGCTGTAGACAGAAGACCACATTATCCAAGC  
AACCTGTCCATTGGGTAAAGACCAAAGACTGGCCAAATCATAAGGTCTGT  
TTGTTTGTGAATTGTATACCAGCATGGTATTTTCTTCTTCTCATTCCACT  
TGGCAAATCTCATCAAGCTCTAGGCATGCAAAGCAAATGGGCTTTAAAG  
AGTTGCCCCACTAAAGCTTTCAACAACATGGAACTCAAAGAACTTCATT  
AAATTAGAGATCTACTAATCAAATCTTGCCAACTGGTAACTCCAGCAGA  
GGACTGTGCCCAGGGTTATAGAACTAATAATAAAAAATTATGTACAGCAGC  
AGGCAACCAATAGTCTATTTTCTGTTTTTATACATCGGCCTTTTATTGAC  
ATTTCTATAAATAGACTGAAATAATATTTATAGTTCTCTACATATCTTT  
TATATGACTTCTTTTATTTAGCATAATATTTTAAAGATTCATATGCTATA  
ACATATATCCGTATTTTGTCTTCTTTAATGCCAGACAGTATTTTATTAT  
AGGGGATATCCCACACTTTGTCTATCTCTTGTTTGATGGACATTTGGATG  
GTTTCCTTTTTTCCCCCCCCACGTTTTTTATTTAAATTCTAGGTAGTTGGCC  
TACAGTGTAATGTTATTTTTCAGGTGTAGAATTTAGTGATTCACTACTTAT  
ATTCAACACCCAGTGCTCATGACAACAAATGCCTTCCTTAATGCCCATCA  
AAAATTAATCATCCCTCTGCTCACTTCTCCTCCAGCAACCCTCAGTTTG  
TTCTCTATAGTTAAGAGTCTGTTTTCTGGTTTGCTTCTTCTCCATTTTT  
TCCCCTTTATTTTCAATTTGTTTCTTACATTCCACATAGAAGTGAAATCA  
TATAGTTATCTATCTCTGATTGACTTATTTCACTTAGCATAATGCTCTCT  
AGCTGCATCCACATCACTGCAAATGGCAAGATATCATTCTTTTTTCTAAA  
GATTTTATTTATTTATTCATGAGAGACACACACAGAGAGGCAGAGACACA  
GACAGAGGGAAAAGCAGGCTCCTCGCAGGGAGCCCAATGCAGGACTTGAT  
CCCTGAACCTGAGATCATTCCCTGAGCTTCAGGCAGATGCTGAACAGCTG

AGCTACCAAGGCATCCCAAGATTTTCATTCTTTTTGATGGCTGAGTAATAT  
TCCATGTGTGTGTGTGTGTGTGCACATCTTCTTTATCCATTCATCTGTAC  
TGGATGTTTTGGGGTCTTTCCATAGTTTGGCTATTGTAGATAATGCTGCAA  
TAAATATCAGGGTTCATGTATCCCTTCAAATCGTATTTTCTATATCCTTT  
GAATAAATACTTAGTAGTGTAAATTGCTACACTTTTTGGCCGTTATGAATA  
GTGCTTTTTTTAAACATTCATTACAAGTCTCTGTGTGGGCATATGTTTCCA  
TTTCTCCTGGGTAAATATCCAAAAGTGGAATTATTATCTCATATGGTAAA  
TTTATATTTAAGAACTGCCAACATATTTTCCAAAATGAATGCACCATTT  
TAGATTCCCATCCACAATGTAGGAGTCTTCCAGTCTCCCCATATCCTCAC  
CAACACTTGTTGTTATCTCTATCTATTATACTATCAAGAACATTGAAACT  
CAACTATCTTTGGGTCCACTAAGACTGATATCTGTATATTCTTCATGTGA  
TGAAAATACACGGTTAAAAAAGAAGTTATCGATAAAATTATCACAAGTGTG  
TGAAAGACTTAAAGATCTCCTGGTATTTAACAACATTTCTCTATTATAT  
TAAAAGTCCCCAAATTACAACCTGTCATTTGCTTCACTACCTGAAAATAA  
GTTGTTGTTTCATCTTTACCTTCTTCAATATTGGATCACCTCCAGGGTAG  
CCTAGTATGAAAGTTTCCATTGCAGCTAAGAAAAAATAACTCAGAAGTAG  
TAGAAAAGGAAAATGGCAAACTAGAGTTCTTCAGCAGACACAAAAAATT  
ATGCAGCCTGATGTTTCTAAAGAGGAGATGGAAATGATTCAAGACCATAG  
CAGCAAAATCTAGGCTGCTGAGCTTTGGCTTCTCATTTACCCAGTTACCA  
GTGGCTCCACTGAAATAAAAAAGGTTAGTCATTACTCAGTGGAAAATTTTG  
TGGAAGGGGAAAAAATATTCTAATGGAATCTCTTGTCCAGACCGCAAAT  
TACTTTACAAGTGACAATTAATTAGGACTCACAACACATGCATAAAGCAG  
TTCTGCCTTATATTGTAGCAAAAGACTTGGTGAACCTCGTTATTTTTTAGG  
ATGTAACATTTGGGAGCGACTACTGGGACATGGATGGGGATTCCATCAGG  
ATTTTATAACAGATAAAGGCCACTATCACTTCATGGGCAGAGACCTTCCT  
TTTGTTAAGCCACTTAGAGAAAGGGCAGGATAAATCAAGCATGTAGCCAT  
ATGTTATCAAAAGTTCATCTTCTTGGGAACGTGAATTAAGTGAGACTCT  
TACCCTTATATTTAGGACATTTAATGGTCCTAAATGGTATTTTTTTTAC  
TCATAATACCCAACATTGACCAACAGAGAGTGGCAATAGTGGCAAACCT  
TCTGTTTGCAGGGTATCCAACAAACATTTATTGAACATCAATTGTATGCC  
AGTCACTACATTTCTGAAATTTGTCAATTAAAGTATTTTTTTAGAGTAGTG  
TCACAACACTAAAGTTGCCAGCAGTGGGTGGTGACAGAGTTGGGTGCGGG  
AAGTAGAAGAACCACAAGATAAAACAAGAAATTAAATCATGGAAGCTTTG  
TAAAAATAAGAGTAGCAGCCGAATAGGGAAATGCTACACTCCCATTCCCTA  
GGATTATGACATCATTAGTCAATGCATTCAATACCTTGTTGATGTTGGGG  
TGTTCTCTATCCCTTCCAAATCCAGAGCTTTTCCAAGTTGGTCAATGCC  
TAAGCCATCAGGCCAAGTGCTATTTTCAGTTCACCGGCTCCCTTGTTTT  
GCGAGTTCAGCCCAGACAGGAAACCACCCAGTCTGGGAGGATTCAGTTAG  
ATCCCCAAAGAGCACACACACTCAGGTGCAAGAGCTTCAAGGCAGCAAGG  
CATGTTCCAGTTAACTGACCCATGCTGCTTGAGAAGTGAACAAGCAGTCA  
CAGTCTCTCTAGGGGATGAACACTGCTTCATATATGTGAATATGTGTATG  
TGTATGTATGTAAATATATAAGGGCAGATCTAAAAGATATTTTACAAATC  
CCACTGCTCTTCTCCATGTAGGACTCCCTCCCTTCCCCGAATTTCCACA  
GGGAACCTTGTTGGAGAACTTAGAAAATAGTTTTATTTTAGGAAGAAGTCTTA  
TTTTGACTCAAGTGCCACTGGTTAAAAACATTGTGTGAAAGAAGTAATAT  
ATAGCAGATTTTGTAGTTTTGTAGACAGGGAATAAATACCTGTCATGTAC  
AAAGTTTTTGGTCTAGAATTTGGAGAATTTCTTTAAGGTATTCTTGGCTTA  
CTCATTATCTCATTATCTTCTCTCATGAGGAACAGGGCAAATCTGAGATC  
CAGTTAGTAAATACATCTGATGTTTCCTGGTCCTACCAGGGACCATGTGGC  
TTTAGGCATAAAAGAGAAGAGGAAAGGTCAGTGGGACTCATCAGATCAC  
CCTAAAGTATATGCAATATCAGGGATATACTTATGCTAAAAGACTACTTA  
TTGTTTCATCTGAAAGTCAAATTTCACTGATTTCTTGAATTTTATTTGGCA  
ACCTTATCACTGGTACCCATCACTAATTCAACTTTATGCTACAATTTCTT  
CATGGACATTTCTTTGCCTTTTTGATCTTTATTTCCCCATGGGCTGGGAAC  
AGAGTAGACAATCTACTAATGTTCACTGAATGAATGGATACATAGACTAT  
AATATAGCCCAAATCATTAGTTCTTATAAGACCCATTATCTTAAATGTT  
CAAACCTGAGGTTAACTGAGTAAGCAAGCGTCAGTCAGATCTTTCAGTTGA  
ATGAGTTCAGGCCAGACTATTTATCTATTTATTTTGAGAGAGAGAGAGAG

AGAAAGAGAGAGAAAGAGAGAGAGCGTGTGCCCAGGGCAGAGGGAGAGGG  
AGAGAAAATCGTAAGCAGGCTCCATGCCCAGGGCAGAGCTTAATGCCAGG  
CTTGATCTCAGGACCCTGAGATCATGACCAGACCGAAACCAAGAGTTGGA  
TGTTTCTACTGACTGAGTCACCCAGGTGTCCCAGGCCAGACTATTTAATA  
CTGTGGTTCCTTCCTTTGGTCAACAGGTTTATATCCAATTTGGGGTGAATT  
ACTTCCCTGTAGGGGGAACCAAGAAATTCCATTCAACCGTTCATTGGATG  
ACCACTATGGGCCAAGATATATTTATGTTAACATTTAATGCTCTTAAAC  
CCTACAAGGTAGGAGTTTAACCTTCTTTTATATTTGAAGAAGTGAGGCAC  
AGGGAAGTTAAGTAATTCTCCCAAGATCACACAGCTGGTAGGCACTACTG  
GAATTTGAACCCACACAGTCTGACTCCAAAGCTGGTCTAGTAACTATTCA  
GCTACACAGCATCTCAAATAGAATGATACTGTATATTCAACTATGCTAAC  
ACCATAGCTTTTTGCTACAAGAATGAAGTGAATTCTTCCTGTTTGTCTTT  
CCTCAGCCCTCTTCATCTACTAGCCAATACCATTCTTGAACAGTCCCTGT  
CAGGGTCCTTTCTTTCTACAACCCTCATCCAACCACCCCCAGCCCCAAC  
TCCCACCAGTAGATAACTCTTAGCCAACAATGCAAATGACTTTCCAAATG  
GTGGCAGCGACATACAAGAGGAACTTCCTGTGGAGTTATGTTCCAAATT  
TAAGAATTTTATGAAGTAAATCCTCCTTCCAGCCCTGCCCCAGAAGAGAA  
GATAGAGTGAAAAAATAGGAGCAATTAATACAGTACGAGAAGCCTTCTAG  
ACTTCTCTTTTGAACTTCTGCTTGTTGGGTGGGGAGGAAGAGCCAGGGG  
TACAGATTTCTCACACTGGAGATTTATGTCCAATAGATAAACAGGGACCC  
GGAAAACTGGACATAATTCACCTTTATTAAGCATGACTCAGGTGATCTCCA  
GTGATTCATCTGTGTTTTGGGGGAGAAGAATATTTCTGGAAAATTCCCTA  
AAGTCATTTTCATGGAGAGGACTATAAAAAATATTAGGCTCTTTTATCTGCA  
AGTGATAGAGACGTAATGTATCTTTATTATCCAATTTAAACTAATATTT  
TAGGTGATGACAAGTTGAGAAGACTGGACCCACAGAACTGGAAGTGGAAA  
TTATCAACTGGGAAAATCTAATCCAGCTTGACTGATGGCTGGAAGGAACA  
AGGGTAAGGTTGAATTAACATTTTGGAAGGCCAATACATCAGCTGTAATA  
AGCCAATTTCAATGGGAAAAAATAACGTGTTAAAGCATGAGATCCTTCA  
ATTAGAAAGAAAGAAAAATACTACAAAAGGCCAAATATCAAGAGACATTT  
CCAGAGAAGTTGTTCAAAGTATTTCCCTAAGATCTATTTTAAGAAGTCTT  
TTAAAGAAGATTAAATCATGGTCCACCTATAATGACAGGCATGAGATTCT  
CAGTAGGGAGATAAAGATAGGCAGAATGACATTCTATTTCCCTAAGATTCT  
TTGAATTTTCATATCAAAGGGCTTTCAGTTCAATATCAAGGGCTTCACAGC  
ACATGTATTTCATTTCTGAGCCATCTTCCACCCACAGCAGCCCACTAGACT  
TCGGTGTTCTGGGGATTGGGAGATAGAGCCAAGGATCTACCATTTCAGAGA  
CATTGAAAACCACTGTCACTGCCTTTGGATATCAGCACCCCTATATTCTC  
AGTCGATTACCAGGGTCTCCAAGCCATGTCACTCCTGACATTCTAACTG  
CTGTAAGGAACAAGAGACATACCTGCTTTATTTTATGCCCACTCAGGCC  
AGGCCCAGTGGATATGAGCAAACCCAACACATAGCTGCTGTGCGATATGT  
AGGCAGGTGAGTAGACATCTGAGCACCAGCCAGGAATGTTGACCTATTAT  
ATCTCACCAGGATGCAAAACCTCATTTTACTCAAACCAAACTCTCATCT  
TGGCTCCCGGGTAGAGGTGAGGCATAACGCACAGATCAAGTCCCAGGAAT  
GAGAATGTAGAATCTCTGTGCCTTACTTATCCTCCTTTGATGCAAGGAAA  
ACCAGTAGGAACCTCATCAAGGTGGATTGATCAGGGGATGCCGTTGTTT  
ATACTTTGGATCTGATATACACTCACAGAGAAATATCAAGAAAATTCCAT  
CCAGAAAACAGTGATGGAACAGCAGGGGGACAGGGATAGAGGACAGAACA  
GGAAATGAGAAGAAGAAAGAAAGTGAAGAAATTAGGAATAAGACGAGGGG  
TGGAATTAGGGAAGAAAGAGGTGGGACAGAGTTACTGAAGCCTTGATGA  
TGAAGACTGACCTGCTGCCAGTCCATGAGGAACCTGCTGGTTTGTGCATG  
TGTGTTTTAAGGATCGGTTTCATCAAGACCAGGAGTTGGGCAAGGTTCCC  
TGCTGATCACAGGGCCAATATGTTTCTCCAGTATTGCTACCATTGAGAAG  
GAAAGAAAAAAAATATTTGGCATATTGCTTAGACAAAATTACATTTCA  
TTGTGGAAGAGTCATGTTTTGTTCACTTTACTCAGTTCCAATCTGTTCCA  
GCTAAGTAACATTCTTATTCTTCTCCTCATTTTTTGTAGGGGCAGAAAGG  
AAAAGCGAAGACAGTGACAGAGAGACAGGGACAGAAGCAAAGGGAGAG  
GGAGAGAGAGAGAGAGAGATTGAGACAGAGAGACACAAGGGCCCTTAGGG  
TCTACTGAATTCTTCCAACCCCTTTAAAAGTGAGATATTTCTTACATGT  
GTAAGAAGAATTTGAAGTAACTGTTTTTTTAAAGACTTATTTATTTATT

TTAGAGAGAGAGAGTGCTGGGGTTTGGGGCAGGGAAGAGGGAGAGAGAGA  
GAGAGAGAATCTCAAGCAGACTTGACACTCAGCCTGTAACCTGATGTGGG  
GCTTGATCTCACAACTCTGAGATCATGACCTATGCCAAAGCCAACTGTCT  
AATGCTTAATTGACTGTGTCACTCAGGTGCCCCGGATTAACTATTTCTT  
GATTCACCCACAGTTTCAAATATAGAAAGAAAATAAGGACCCAATATGGC  
TTAGGTTTTTTTTTTTTTAAGATGAAAAAACCTTATATGAGGCCGAATTCA  
ACACAAGCAGAACTATTTTGGTTCCTATCCAAAAAATAAAGCCTTCTTTA  
AATAAAATGTCAAAGAACCTCATTTAAGAGCAGTTGTATCCAACCTCGA  
AAAGAATTCTCAGAGAATACTGCAGGCTAGACCAATTAGAGACAATATTG  
ATACCTCCAAGGTCCCTGAAGATCCTGTGGTCAAATGGTTCGAGGTCAGC  
CCTAATTGCACTTATCCATGTATTTTCCGGTGGGACAAAACAACCTCCCT  
TTCAGGATGACTCTCCCTTATCAATCTGCAAACCACAGAAAGAGAAATGA  
CAGCAAACCTGGAAAATATAAAATCTCATCTTGGAAGTTGGCATTTAATAT  
GTAACCAAAAATCTAAATAAAATAAAGTGGGGCTGTAAGGCTTCAGTTGAA  
ACCAGAACCAATTGCCCAAGTGCCTTATCAGGTATGATCCCAGCCCCGGAG  
ATGGAGGTAGAGTGAGTGAAGTAAGCGAGCTATAAAATCAGATCCTTGGA  
GCACGCAAACCCACCCTTCTCAGGTTCTTATGCTTTTGGAAAAGGTCTGC  
TGCATTTGGAATTAAGTGACTTAAAAAAATTGGTTAACTATTGACTGCAT  
TTTTCTTAGAAGTATAGATAGATATATATATAAAATGTATAACTCTACAAA  
TACACATTCCAAATAAATTAGGAAATGATATAATTAGTTTAGCATGGTGG  
TTACAGTCACTTGAACAAAAAAAAAAAAAAAAAGGAAAAAAGCAAGAAAGA  
TTTAAATGCCTGTTGCCTGTTTCTGGTACTTAACAAGGAATTGAAAGAA  
ATCCACATAGGTTTGCCCTATTAATGCCTTCAACTTTTGAAAACCTGAACC  
TCTTCCAACCTTGATCAAAAATGACCAAAATTCATTTGGTCAAGTCTCTGA  
ATTGTACAACAATTCAGAACATGTTTAGGTATTCTCTACAGTTTGGTCCT  
ACAACAGCCAGAAATTGACAATGCAGACAGAAGAGTAGAAGGAAAAGAAG  
AAGAAAGAGATATGAAAAAAGAAAAAGAACATTATGATACGAGAGAGGT  
GATGTATTTCCACCAATTATTGCCAAGAAATTCTCAACCCGATCCCTTCA  
CTGACCATAGTACAATGTGTGTGGCTTAAATCCAGCCCCCTGTGCCATT  
TACCTAATGAATGATTCTACCTCCGATCAAACCCAAGCTGCGTAAGCACC  
TGAGCTGAACCTAAGAGGGAAGGAAGACTCCACTGTATGCTCTCTTTGAC  
CTGATCAAAACTGAACCCCAAATTTTCTTTTCTTAGGAATTCCTGAAGA  
ACTGAATTGAAAATAGCGCATGGAAACCTGCTGCATGTGGAGAGGATATA  
AAGTTTAGGCATGGTACCTTTTTTTTTTCCCCTCAATGAACTTGACTGTT  
ACAGTAGTTAAAAACCTCTGCATCCATATTCACATTAGCCAAAAAAATTG  
CAAAACAAGAATTCCAAAAGAATCAGCAATGAACAGATATCAGTACGCCA  
ATGAGAGAAGTGGGAAGTCTTATTTTACTCAGAACTTCTCCTGATCAGA  
TGCCCACACCACCCACCTGAGCTAATACTGCTTTATGCTGAACTAAGC  
CCAAATAAATAAATAAATAAACCAGAATAAATGTCTGAACGAGGTATTTT  
CTGGATGCGTACTGTTCCAACCATTTGTGTAAGCTGCTGGGGGAAGAAAA  
AAGCTGGTAAACAAGACAGACACACTCATTGGTTTTATGAATTTTACATC  
TACAAGGGGAGTGAGCCAATTAGCAAATAATCACCCAACTGTGTCAAGT  
ATTGATTGCAGAAGGAAGACAACCTGGATATCATGAGGGTATAGGGCAGGT  
GGGCCTAATTCACGTAAGGTGGGAGGTTTGTAGAGGTATCAGCAAAGCTC  
TGAACACGCTGCTGTAAAAATCTTTTTTTTTTTCTTCAGTCACAGACT  
CAAAATCATATGGATGTGGCCCAAGACCATTGGAGTGAGCCGGGGAGT  
GGAGGTTGATTGATTCACTGGTAGACAGGATGCAGGATTCTTTGGAAGAC  
ACATCATCAACAGTAAGAACAGACGAGGTGTCTTGAACCTGGAAATCAAAA  
TGAGGTACAAAATTAGGTGCCATGGAATGACTACCAGTGAATTTCCGCCT  
TTAGGTGGGAAGAATTCTGTTTATGTGCGCTGAAGGGACATTGGGTGAC  
AGAGGCAGAACCTCACCCAGAAACCCCGAGGCTGAGGCAAATTCTTTCTG  
TCTCTATTACAATTCTCAGGAGCCACATCCTGTTTTCTCCCAGGCTCTG  
AACTCACTCTGCATAGCCAGACCAAGCCAGAGTGTTCCCTCCAGCCCTGGG  
TCTCTGCGCAAGGCTGGCAACTGTTTGAGGAGCTCCTTGGTGCATCAGAG  
AATGACATGCAGCAGGAGGAGGCTCGGCTCCAGGCGTCTGTTCAAGTCCA  
GTGATCCAGTGATTGACGAAGGCTACTTTGCACTTTGAAGTCCCATCTGC  
AGAAAAAAGATGTGAAGCCTTCTTCCCGTCTTATCTATAGGAGAACCCA  
GCTTAGGATTTCAGAATTCCTGATTTTTTGCCGAGAATCCTTCTGAGAGTC

TTTATTTTTAGATCTGTGGGCAGCAGGGGGTGGGGAAATGCACTTTCTCT  
TTTCCAAATTTGAGGTTAGTAAAACATTATGTGCCCTTGTTTAAATGGCA  
GTGTGCTTTTATACAATATAGTTGTATTATTAATAAATGACCGAGTTAAA  
TGA CTGGTAAAATATGTGGTATGGCACCAACAATTGCTGGGTGGGTTTC  
CATGCATTTCTCGTCCCTGCCATCACAGAGTCCCCAGCAAAAGTCAGGAA  
AGTGGTAAGGTTATGTTTGTCAATTGTAAGAGTCCTCTTGAATGTATGCAA  
AATGTATTTAACCTTAATAAGGTATAGGTAGGAAACCAGTCAGGCCAAGG  
GTTTCATTTAACTGCCCTTATTAAATGCTCTGAGGACAAAGGATATAGAA  
TCACAAATTGCAGACCTGGAAAAATCATCATCATCTTTTATCAAGTACTT  
AAACACCTCTAGCGACGTGGGGATTTCACTGTCTAGAAATAGAGGTCTCA  
CTACCTCCTCAACAGCCCATTAGACAGCTTTCAATGTTGAAGGCTGCGAT  
CCAGAAGAGCATGAAGAAAGAAAATGTAAACAGTAGACAAAGTTACCAAGA  
GTACAATATACCATTTTACCAGGATAGCCAATTAAGAAATCATCTGTTAA  
ATAAAATAAACATTGCCTGGAGAGTAGAGCCAAAATAGATCTAATATAC  
CAACTCATTAGTTTAAACAAGTACTCGCCGAGTACACATTATATATCTAGC  
ACCGATCTAGGCATTGGAGATACAGCAATGAATAAAACTGGCTATGTTCT  
GGCAACTTAGAATAGCTTACGCAAGGATTAACCTGGGATAAGTAACCCTGA  
TAGCAAGCACTCCTATTGGGCCGTGTGCTAGGTTTTATTCTAAACGTTTT  
GTAGACATCAAAATATTTGATCCTCACAGTGGCCCTATGTAGAAGGTACT  
TCTGTTACCCCTGTAAAAATTCCTAAACAGGAGAGAAGATGGAGACCTT  
TTCTCCAAAGTCACGTGGCTAGCATGCAATAGAGCCAATGTGCACCCAGG  
CAGCCTGGCTTCAGAGCCATCATGCTTGGTTGTCTTTTATAAAAAGGGAT  
GTGTGCTTGGGCGGCAGGCAGGGTGTAGGGATTGCCTGTTTAAATCACAGG  
GGAAACACTGATACCACGGGGTGCATGCCAAATTTAATTTTAAGGGAAGG  
ATCTGTGAATGCTGAGGAGGTAAACCCAGAGATGAGGCCTTACAGTCAAAT  
AGGTGAAGTTTGCGGCAGCTGGAGGGGATAGAGAGAGGTGATTCCACCAA  
AGGTGATGCAGGTACCCAGGCCAGAGAAGTAAGACTGCGTGACATGTAC  
GAGGAACAGAAATACCACAGTGTGGGGGTGACTGGGTGACTGGGTGATG  
GGCACTGAGGGGGGTACTTGATGGGATGAGCACTGGGTGTTATTCTATAT  
GTTGGCAAATTTGAACACCAATAAAAAATAAATTTACAAAAAAAAAAAAA  
GAAAGAAAAGAAAAGAAATACCACAGTGTATCTGGATCCCCGATGGACAG  
ACAGCGGCTCAACAGTGACACAATTTTTTCGTCAATTGCTATTGTCACCTGG  
ATCACCCCTTCATTTATGAGTTAGTTAATTTGTTTCACTGATTATTTATTT  
CTCAATCACCCCACTGGAGCTTGGTCCACAGTGTCCCTGCCTGTCTCTTG  
TGCTGGATGAAGAGTAAAGGATCAAGCAATGTTCAAAGAAGCAACCTATG  
TGCTTTGAAGACGGAAGATGGTATTGTAAATGTGTCAATTTCTTTCTAAAT  
TAATCTATAATTAATAGATTTGATTGATGCTTGCCAGTCAGAACACCAA  
AGGTATATTTTGAACCTGAAAAGTCATTCTAAAGTTCATCCTGGGGGAA  
AAGTATGCAAAAATAACCAATAACTCTTTGGAAACAAATCCAAGCAATTT  
GGATTAAAGAACTACCAGGTAATAAAATGTATCTTTAAACCATAATAACT  
TTAAAAGGGGGGATCCTGGTGGAAGAAGAGATAGGTGGCCCTCTCATTGC  
TGTCACCCCGCACTTAAATAGTGAAAGTTTAAAAATCATTTAAATCTCC  
AATGATGGGTGAAAACAGAAATGTCATGTTATTTTTCTTTCTTTAATTGC  
TACTAAGGTTGAACATTTTTTATTTACATATTGACCACTGCATTTTTCT  
TTTTTTTTTTTTTAGTTGTTCACTTCCTTTGTGCATATTTCTATTGTTTT  
GGGTTTTATTTGTGGATTTGTTTAAAGATTTTTTTGTATCAAGAACATTGA  
GTTTGTTTTGGGGTAACTTTTTTGTTGTTGTTGCAAGAGAACTATTGCAT  
TCATTTTAATTTGTTTTTTGTTTTGTTTTGTTTTGTTTTTAAAGACT  
TTGTTTATTTACTTGAGAGAGAGAGACATTGAGATGGAATGCATGCAT  
GAGTCAGGGGAGGGGTAGAGAGAGAGGCAGACTTCCCGCTGAGCAAGGAG  
CCCAACTCAGGGGCTCAATTGTAGGACCCTGGGATCATGACCTGAGCCAA  
AGGCAGACGCTTAACCGACTGAGCCATCCAGTTTTTAATTTGTTGACATAC  
CCGTGGACTTATTCTTTACCACAGCTTCCTGCAGCCTTATGCACATGCAT  
GTGTACACACTTGCTTGTCTACACTATCATCCTTTCTCTCCACAATGATG  
GCCAAGACAATAAGGCAACTAGTATCTGACAAAACATTATCATGGCATACT  
TTCTTGGGACCCTACATTAGCCAAGTGCCACATTTTCAAGAGTGATTCTAT  
GCAAGCATAACTTTCTTGATGAGAAAGGCCATAGACAGTCTGAAAAAGA  
CTTCAGAACCAAAACATTTGAAAAAACTGTGTTTCGTTTGAAAAACATTTT

CAAGACACAAAAATATCTGGAGCTATAATTACCCCTTCACCCACATCTAT  
CCTTGACTATTTAAAAAGCATGCTTTATTTCTCTCCAAAGATTATTCTCA  
TATAAATCCAACGATACCTTACAGCGGACGTGTAATGAAGTGGGTAGCCT  
GACTCTCCACATGTGTTATATCTGAGTAAATAAACAAAGACGTCCCCCA  
GCAATGTGCTCTTTTACAATACTAAACCTAGCATCTCGAACTCTCCTTCC  
CTTGACTTGATTGACTTATATCCTCAAAGCTTCTCCCAGGCCTGGGTGC  
CCAGCAGAATCCTGGATTGCACCATGGAGTATATTTATCTAATGAAATAT  
GAGCTGTGGGTACAATGAGCAATGCCTTGCCGCAGACACCCCATTCATCT  
GCTGAAAATAATCAATCTCAGAAAATAAAAGTCCTGGGAAAAGTTAAAAT  
TGGGTACATGCCGAGGATTAGCAGGGGTTCAAGGGCAGAACTGCACTCAT  
TTCACTGACTTGACTCAGTGCTTGGAGAGGGATTTGGTCATTTACATGC  
AATGTGACGAAGGGGTTGGGGGGTTGCTGCCTGCAGGACAGCCAGGCAGG  
TTACTCAGAGTTGCCTCTTGAATGGGAAATCACATGGTTGTAGTGGCGGC  
TCATCATCCCATTTCTGGACATGCTGATGCTCCAAGTTGGTCAGCTTAGT  
TAGAGAACCTTCATGTCTATCCCATGGTCCACAGTGTTCCTTAACCTTGG  
CTGAAAATCGTGTTAATAACAACCATAATAAATACTCTAAAAATACATGA  
CATTTATTGAGTAACTATGGTATGCCAGGAACTTTTATAGAGATATTTCA  
AAATTTAAAAAATCTCATTTAGACCCCCTAAGCTCAAAGTAGCTATTATT  
GTTCTGGCTGATGGATCTATGCATAAGTCAAGGCTTAGAGCAGATGAGA  
TTTCAAACCAAGATTTAAACTCTGTGACTGAAAACCCAGCCACTTTTACT  
TAATGCAACACCGCACTGCTAGAAAGTCGAAAGGGTTGGGTGTTTGTCC  
CAGTGTGGTCCGTTTCTTTTACTGGAAAAACAAGGGATATCCCATGGCTC  
TAATAATGCCAATATCAAATTGATAGGCTAGTAGCTAACCAGGAAGGGGA  
GAAAGTTTTCCAATGGCAGAGTCTGGGGTGAGGAGGATTAAAATTCGAAG  
GTGCCTTTCCAACATTATGAAGCTCAGGAAGGGAATGCACAGAGCATGT  
CCATCTCCCCTTTGGGCAAGGCTGGCTGTAGGCATTTGCCTTGCCACCCT  
TGCTTATGGGAAGAACCGCTCCTAAGAAGTCCTAGTTTTGCTCTAAACA  
TTCATTTCCCAAAGAAAAGAATCAGGTTTCAGGTGGAAGTACTCAAAAAG  
GAAAAAACAAATGAGGAGAACTGGAACAGAACTGAAAAGTAATGTTG  
AATTTCATGCTGGTTAAGAATGTAAACTCTAGAGCCAGCAAGACTTACGT  
GTGAATCCACACTCTGTTGTCTGAACTAAGTGACTTTCCCCCGTCCTTA  
TATTAGTTAAGAACAGAACCTATTGCACAGGGTTGTTGTCTGGATTTAA  
TGAGATAAAGCACACAAAATAGCTTGGCACATAAAAAGAACAGAATTTAG  
GAAAGTTGCCATCCTCGTCATCACCATCTTCATCATCATCATCCAGTCCT  
TCTTCTAACAGCCATGACTCTTCTGCATACTTTGCTCTTCACCTGCGTC  
CTATGTTGGAGTCTCACACCCTCTTATTGATGAAGAGTCGACAGGCTTAT  
GATAAGCAAGAGAGACCAGGCTTTCCTGTTTGCTGTCAGAGATGCCAAG  
AACGAGTGGACATTTTCACCACATCCTTGTCTGAAAGGAATCCTGAAGAT  
CCAGCTATGCTCAACCTCAATTTTACTTTTCTAATAAAAAATAAATAATGG  
CTCCTAACTTTGTATGCCAGCCACCCATGTTTCAGCTAGGAAGAAGGACCA  
TCTCTTATAAAGGTCTCTTTTCTCTCTATAAAATGTCAGGTTGCCATCTT  
CCACATACTTCTACTATTTTCTACTTTTCTTAAACACCGATAGGCCA  
AATTGTTGAAGAATCATGTGCAGTGAATGAAATGCTGTTCTGAAGAAC  
CAGAGCTGGAAGTAAAGACATTTAGCTTGGAGGGACAGACACAGAAGCAG  
AAGGGCCAGTAGTGGATGGGGACAAGGCTATAGGGGCAGAGCGAAGGGAA  
GGAAGCCAACCTCCCTGGAAGCCTGGCTGAGTTTCTGGATGTTAACCCATC  
CTTTTCCGGAAGGCAACCCCCCTTTGATATGGAACCTAATCACTTTTTTA  
AAAAAATATATTTTATTTCATTTATTTCATGAGAGACAGAGAGAGAGGC  
AGAGACACAGGCAGGGGAGAAGCAGGCTCCCTGTGGGGAGCTCAATGTG  
GGACTCGATCCCAGGAGCCCATCACCCTTGAGCCAAAGGCAGATGC  
TCAACCACTGAGCCACCCAGGTTCCCTTAATCACATTTTCATAAATCCA  
CACGCATAGCCTTCTGATCATATTTGCTTGGACTGGAGAATCACTTCCAA  
AGCCTCCAAGTACAACAGCAGCATCTTTTAAATGGGGTTCTCAAAGATC  
CATCCCGTAACCCCCCGCAAATAAAAAATCCAGTCCCGCAGTGACATCAA  
GGAAACACAGTCCAATAAAAAATAAACCAGGGGTTTTCTCCGCTGACCT  
TGAATTACAAATTATATTTCTCATCCACACAGAGAGACTCTTCCCTGCA  
ACATCCCAGAGATGAAGCCGAAGTGTGAGCTTCAATATTAGAAGTTAATT  
CTACATTTCTTCCGCGGATCACTAATGCCAAGGTTCTGCGCAGCTGAAC

GTTCTGTGGTTGAGTAGATTTTAGTGGTCTTTAAGAGATTACCTCAAATG  
CAAAAACCCTCTCGGTACAAGACCAGAAAGATTTCAAAAGAAAAGAAAA  
CACTTCCCCTGCTTTATAATTTGCTTTCAAGAATTTAAAATTACTTAA  
AGCCTTATTTTCTATCTAAATTTGTGCCAGGTTTCAGGCATGGGAGATGT  
CCTATTCTTGTCTGCAGACAATGTGTCATCAACCAAGTATTTATTGAGC  
ACGTGAGTCATAACTCACGAGGTGCCAAGGCAGCTGGAGAACATAATGAG  
GAGGAGCCGGCTCTCTGCCCTCAGGGGACTTACACTTTAATTGGGAGCCC  
TTTGTTCACCTTATTGTTGTTATGATTATTTTAGAGCCTCGGTGCACGC  
AGTTGTTTGACGTACAATCAGCAACAAGAGAATGTCTTGTTTCAACCCAT  
TCAGTTTTGGAGAATGACTTGCATCTCGACCTTTGGGGCTTCCTGTTTGC  
ATATACCAAATTTTTTGCTGAGCTTGGCCATGTGTGTTCAATTCAGAGG  
GCGTTGGGCCTTCTGTAGAGGGGACATGAGTCAGGCCCAAGTCAGAGA  
GCAAGAGGTAAGGAGAGCAGGAGCAAATTTGGGTGTGAGAGGAGGTGATGG  
GCAGGCCGTGGTGTGGGGAAGAGAGGGAGCCAGGTGTGTGCAGTGGCCGG  
TGAGCCTCGGAGTGGTGGCTCTCTTTGCTTTGGCGGAGACACAGTTGTGC  
GGGGATGCATCCCAACTGAACTTTAAAGTGTAGGAAACAGAAAGTGT  
GTCCCTCCGGAGAGTGTCCCATTTTCCACTCCGGCCCAATTTGCGTGCC  
ACAGTCCTGACTCTGCGATCCTCCTCTCAATGGGCACTTATGTTCTCGCC  
AGGAAGGGCAGCCCTGGCTAAATGTTATGGTTTGAATGATCCTTCACAA  
GGATGGAAAACCGAGTTAATTCAATTAAGGCCCGGGTCTGGGCTTTGA  
ACCAGCCACAGTCTAAATTTTATGAGAGGATGAAAAGTTAATTATTTGCC  
GAGTTTGAGTGAAGTCTACTTTGAAAATCCCTTTCCAAAAGGCTAATTT  
CACTTTAGCTTCCCTGTAGAAAATCAAGGCAGGTTGAACTAGGGTCATAA  
GTAGAAGATTAGGAGCTGGGTGTTTCAAGGGGGTCCCGAGGCGCCCCC  
CCCCCATGACAACCCCTGCCTTCCCTCTCTTCTTCCACATTCAGAGGG  
TTGGATGGTATCTGGAACGTGACTGCAGCCTATGTTTACCACCACAGGCT  
ACTTTGAAAATAGAAAAATAAGCTGAATTTAGGAAGTCAAGTTTTTAG  
GGTGCTTTCTTAGAGGAAAATCTTAATTCATTTGATAGGCTTTTCCCTT  
TCTCACAGGCAGCTTCATTGATGCTTTTAATGTTATTATTTAATTACCTT  
TAAGTTTTTTTTAACTTAACAGAGTTATACATATGCGTGCATGCATGTAT  
AATAACTATAAAACAATTCCAATGATGTTGAAAATATAAAGAAAGTGAGA  
ATCATTCATAAACCACTGCCAGGTAATAGGTGAATGGTTTCGGTGTATA  
TAGTTCCAAAACATTGAAGCTTGTGTACAGATACACACATACCCACAT  
ATAATTAAGCATATGCAAAAAAATAGTATGTTCCAGCTTTGTTCTGTTTT  
TCACAACAGCGTATCACAGACATTTTCAAGCATAAGTTGGGAGAGCAAAAGG  
ATGAAGTATGTGGGTCTAGGGAAAAAGAAAAAATCTTTAGAGTGAAAT  
GAAAACTACTCAAACAAGGCCAGGAAAAATAGAACCAATCTATGGTCT  
GGTCTCAGGCTTAAATGAAATATTCTAGGTATGGTTTTTAGTATCTAAA  
TTTAATAAATGCTTGGTAAATATCAGCTATTGTCTTAGCATCAGTGATTT  
GTGTCTTCTCTGTAATGCTAGTAAAACGCCCCATAATATTTATGGCTGT  
ACCCCAATTTATCTTAGAATCATTTCTTCTTGATGGACATTTAGATTGTTT  
CTGATTGCTGTCTCTCATAGATGGGCCTGTGCAACTTTTGCAGCTTTAG  
TGTTGATGCAGAAACTGGAAAGAAGTATTTTCTAAAAATAAGAAACATC  
AGCCCCATCCCCCTAAGACAAACACCCCCACACACACACACACGCAC  
ATACACACAGACTATTTTACCATCACTAATGAGTTTACTTAAGTAATCCC  
AAGGAACATGCTAGAAATGCTACCGTAGGACTTCAACCAAAGGAAAGGAA  
CATTTTTTAATCACTGTACTCAGGGCAACAAGAACAGAGGTGAAGTAAAG  
AGGATCTATTTCTGACTCTGAGTTTATTATCAACCCCAAACAATGCTAA  
CTCTCTGGGTCTCAGCTTTTTCTATTTAGTAATAAAGAAGAGGTTGAATGA  
AATGAAACAGAAGTTTCCTTTCCACATGGCTATAGAATTTAGACTCTGTAT  
GGATTGCTTGAGGATGTCTTACCATGGATGCTAAGAGGAAAACCTAAGTC  
CTGCACTACAGTGGGCTCAATTCAGGACATTCTGGTGAAGCCTCAAGGA  
CATCCTGGTATGTCATGTCTTTGCATTTCAGCTCAAATGCAGAATGCAGCT  
CTTACCTCTGGCCCGTGCTAACTCTAGGCAATGGATGATAGTAATATTG  
CCCAACACATCAGTAATAGCGACCCATAAAAAATCGAAAAAGCTTTGAAAC  
ATCGAGTCAACAAATCACTCAATCCTATCACATTCATACACGACTTCAAA  
GAGCTACGGAGGACATGAGGGACTTCAGCCGTGGCATTGTTACCGCGTCG  
TGGGAGAGAAAGGCATGCCTGTAAAAAGGTCTCTGAAAATACAAAGCTT

GACTATATACAGATTGATGCCCTTCTTTGTTTCCAAAAGGATTTACGGCA  
GTTTGAAAAACTGCACATAACACACCAAATGCATAAAATAATTTAGAG  
AAACAGCGCTAACAGAAGACAAATATGGGTGCAGGATGAAGGTAGGGATG  
ATGTTACCCAATTTGCTAAAAAATAATGCTGAATGTTACATCTTTAAG  
TTCTCACAGCCAGCACAGAGCCAAGGAGAGACAGAGGCTCCTTTGGCTCA  
GGTCGTGATCCCAGGTTTCTGGGATCGAGCCCCGCATGAGGCTTCTCTCA  
GGAGCCTGCTTCTCCCTTTGCCGTGTCTCTGCCTCTCTCTCTGTGTCTCT  
CACGATTAAATAAAATAAAATCTTAAAGAAAAAAGCCAAAGGA  
CAGCCAAACATTACAGTGTAGCAGGATCCTAATAATAAGAGTTAAGGCC  
CATACAGGGCTTACTGTGTGACACAGTAGGTGACGTTCTAAGAATTTTC  
ACATAGATTGACTCATTTACCTCATGATAAAGTGCAATGTGATTCTGT  
ATTCTCTCTCAACCTATCGTTGGAGAAACGGGCCCAAAGTCATCAAGTCAA  
TTACCCAGGGTCACCCAGCCTGGAAGCCTGGAAGTCCTCCCCAGAGCTAG  
CTTTCAATTCCCAGCTGCTTCCCAAGTTTCTAGAGTCACTACCCCCCTC  
TCATCCTCCCTCTGGGCTCTGAAACAAAGGGCAAGTGTTTTTAGTTTTCT  
GTTTTGTTTTTTCATTCCTTAGACTTCCCTGAGCGCTCCCGTTTCTCTGGA  
AACTAATTGGTGAGTATAGGTCTGTATAATTAATTAACGCCTTTACAGAA  
ATAAATGAGGCAAGATAAACTTAGGGCCCACTCAGTGAACCTCCCCGCAAG  
GAAGGGTTACCTGTTGTGCTAGAAGGGTAGACAGAAAGGCTTCATGGGGG  
GAAAAAATCATAAAATCATAAAATCAATTTAAAAATGTTTTAATTGGGT  
GAATAAAGACAGGCTTCGTGGAAGAAGTAAACCTTGAAGAACAGGCAGGA  
TGGGGAAAGAGAATTTGGGGAGCATCTCTGGAACAGGAATCGCAGGGAG  
GCTAGCGTGTTTTCAAGATCTGTTGACAAACCGAGCTCCTGAGCCACAG  
CTCCATGGAAACTCAGCTCGATTTCCACAAAGCCACTGATCCTCCTGTAT  
TGACAGATCAAAGAGACAGAAGTAAGTTAGAGCCATGTGTTTTCTTTGCG  
TGTATTTTCATACGCCCCGAAAGGCTCCAAATTCCTTTTACAGGAAGATGGT  
GACATGGCGGCCTCCGTGTTGTCTTCTTCTCTCCCTGTTTTTCTTCTCA  
CTCATCCATTCCTAAAGTCACAAACCCACGAGTTCAGATGAGAATGGCAG  
AGCAGGGGAAAAAGGAAGGAAGCCCAGAGTGTGAGAGAGAAGCAGATGTAA  
AGGCAACTGGCCTTTGGGGCCTACTCCTTGTAATTCTGCCATGAGCCC  
CCTCCATGGCCGAGATGCGAAATCCCACCCTCATTAACAGCCTGGTGACA  
GATAGGAGAAAAGTACCCCATCTGAAGCCACTGGAGCTTCTTTGTCTCGG  
AGAGACGCAGGCGAACAAAACCTGCTAGCAGATATTTTCAGAACATTCA  
TTTACTTCAAAATCAGATCAGTGAAGGGTTGAGAATATTCTCTGGGAAAT  
CTGGTCAGCCTTCAAGGAGAGGTTCTAAATGCAGTCATTGATGCGGTGAT  
TAAGGGGAATAATTATCTCTTCCCTTTATTTCTGGCTCAGAGAATTGCTAG  
AGGCCAAGAACCGATTAGTGCTGGCTAACAAATCCTGCCCCACCCCCACC  
CCCACTTCCCGGCCCCCTCGGACTCCCAAATGGAAAGGGCCAGAATATTTT  
TCAGCTGAACTAATTCATGAAGCTATAAAACCAGCAGCCTTACTTGCCAT  
TCACCATTTGGGATTTAAAAACTCAAAAAAAAAAAAAAAAAAAAAAAAAA  
GGAGATTAGACAGATTGGCTTTATATACTGTTACTACAATTAATAAACA  
GCCCCCTGTGTGAATTAATTGCCTCGATTTCGGCCTAAAATAGAGCAAGAA  
CCTAGGCGAGATTTTGAAAAATGTTGAGACTGCTTTGAATCAACTAGGAA  
TTGCTAATGGTTTTTATAGCTAATACTTTCAACCCTTCCCCCCCCCACA  
AAAGCAAACACAGTCACACACAGACACACACACACACCCCTAAAATTCAG  
GTTGTGTCTCCCTTGATTAGCCTTAATTTTGCAAAATGAAGATTCATGTT  
ACTCTTGCACTGCTTCTCTTCTGGCCTTCTCAACCGGGCTCGGGAGAGAC  
AGAGGCTAGAATACAGGTGGTTTTTCCCTTTCCGAGGCTGCAGGCATACTA  
AGTGTCTGTGGTCAATCAAGTGTTGATTCCATTGTGAGATCTTAGGCCAGA  
GCTCCCAAGTGGCATCCAGTAATCCTTGCCACGGGCCATCAGTGTGACTA  
AACTTTTACATCAGCGTAGTCAGACGAATCCTATTCTTAGACAACTCTAA  
ACATTTTCAAGACCCTGAAAATGAGAAGAGAGAAGACAAGAAATAAGAAAT  
AGTTCTGTGTGTGTGTGTGTGTGTGTGTGTGTGTGTGTGTGTGTGTGTGT  
AGCCTATGTGTGTTAATTTATTTCAACTAGAAATAGGATGAGAAGAAATGAT  
ACCGAATCATTAGGGGGAAAATGTACTGAGACATCAACTCTGCAGAGGTG  
ACCTTACGATCACAGTACTTTGAATTCGAGTAGCTTCATTTTTTCAAGGA  
AGGATTGGGAAAACATATACCACAAACAGGGCATGTGATAGTTCTAGGGA  
TTGTCAACCGGAAAAAGAAAGGAAAGAAAGAGCAAGTTCAAGTAGCATCGTGG

TAGAGCCTGGGTAATGAAAGAGAGGGGGTCGCACTTGACGAAAGCCCCAA  
ACACAGCAGCAGGTGGAGAAGATGTTGACTTTATTTAGCATTAATTGCAG  
GAAAGGGTCTATAAAATGTGGTCAAAAATTATTAAACCCCCAATGTTATG  
CCAACATTATGCCATCTCCTGTTCCAAGGCAGGTGTATTATTCCTGGTCC  
CTAGGATTAAAGTAAATCATTGCTTTTCCACATATTCTGAATATTGCATT  
TCATTATTTTTTTACTGCCCTGTTTCTCGAGGTTTCGTGGCTTAATAGGCA  
CTGTTATGTCTTAAGTCATCATGGTTTCTATGTTGGGAGAGGGAATGTCC  
GGAAAGGCATATCCTTTCAACGTTCCCTCTCCGTCCCTTAAATTCCTAGAT  
GTACTCTCCCTACATACATTTCCAGAACTTCTCTTGGGTCAAACACATT  
TCCAGTGATGGCCACACCAAATCTCTCAGGCCAGTGATATTGAAATACTC  
ACTGAAGTTTAGGGAATTTACCTCAAGCCATTCACTCATTCATCAAAGCC  
TAGATTTGCTTCCTTGAAGCCTCAACTTTGTTCTAGAAGGTACAAAACCTG  
GAGTACCTGGGTGGCTCAGCGGTTGAGCATCTGCCTTTGGCTCAGGTGCT  
AATCCCAGGGTCTGGGATCGAGTCCTGCATCAGCTCCCCACAGGGAACC  
TACTTCTCCCTCTGCCTAGGTCTCTGCCTCTGTGTCTCTCATGACTAAAT  
AAAAATCTTAAAAAAAAAAAAAGAAGGTACAAAACCTATGCTAATGATTTCAA  
ACAAAAGAAAATGGGTTGGGTTCACCCACAGATACAAAATAAATCAAAGC  
AGACTTACTAAATCTCATCTTGAAATTAAAAATATCCCAGTAGCATTTTG  
CAGGAGGCTCTCAATGCTACCCACTGAACATTACGAAGACCCAGAAAAA  
GATAACAGAGATAAACAACCTCTCTGTCAAGAATCCAGAAAGGACTATCAT  
CAGCCATCGGGTCTCATAGGTGGGTTGGGAAACATAAAAAAAGCAAAAGC  
ATTCCCACGATCGACCTCAGGACATCAGTGTGCTCGCTGACCAGCCTGCT  
GTTGGCCACCAGCACACAGGCCAGCTGGGGAGCCGAGCAGCCTCCCCCCT  
TTCTCAATGTGTCTGATTTGGGAGGTGGCCAATGTGTCCTGATTTGGGA  
GGTGGCCAACACACTGGCCCTTCACATTCTTTCTCACTTCCAACCTCAGC  
TTCTTGATCTCTGTCTCTAATTTGCAGAAAACAAAAGCAGAGGCAGAGA  
AAGACCTACAGCAGCCTCCCTGCTTCCCAGCGTGCAAAGTGGTGAGCAGA  
GAAAACCCAGAGAACTCAGGGCGAGAGCAGAGTCGTGAACTGCAGTGAG  
CATGCCTGGCACCTGTTCCAAACGTCAGGCACCACAGGGAGGACGTGGGG  
AGAGAACTGCAATGGTGCTACTTCAGCGTTTCCCAGCCTCACCAGCCCCA  
GGCCCCACCCCGGCCTTACCCTCCTTCCCAAGACAACTTTTTACACAT  
TTTTCCCCTAATGGCTTTTAGTGTCACAGATGCACCATATATCCATTTCAT  
ATATTGTATCTATATCTGTACTTTACACATAAAAAGAGAGTGAGAGGTTT  
TGTTTTGGTCTTGGTTTTGTTGTTTGTGTTGTTGTTTTTTTTTTTTT  
TTTTTGCCCTTGCTCAGAGACAATGTTCACCCAGTAATAACATCACTTC  
TGTTGAGAAATGGGTGTGCACCCAGGACCAGCTCCGTAGACACTGGGGAGT  
GAGGTGGTACATTCACTGCAAAATGGCTTTTTTTTTTCTACAGGCAGGGT  
TTCTCACCTCCAACTGTTGCTATTTGGACCAAATGATTCTTTGCTACGA  
GGCAGCCCTGTGCACTGTGCTTGGTTAGAGTCACCCCTGGCCTCTGGGTG  
CCGGGGGTGCTTTTATCCCCATCTCCAGTTGAAACAACCAAAAATGTCA  
CCAGATATTGCCAAATACCACCACCCTGAGAATCATTGCTCTAGGGGGAG  
GGACACAGCAGTGAACAGGCAAGCAGAGCCCTTGCTCATGTTGCTACTAA  
ACAGTTAATTAATCTTCACAGCTCCCTGTTGCTTTACCTGGCAAAGAAAA  
AAATTAAATAATATCCAAGACCCACTCTAACTTTATTATCCTATGGCAAG  
TGATTTCTTTGTGTGTTTTTAAAAGATTTTATTAAATTTTTTTTAAAAA  
GATTTTATTTAATTGTCTAGAGAGAGAAAAGAGCAAGCACCAGCAAGGGACG  
GGGCAGAGGGAGAAACAGGAGCCCCACGGAGCAAGAAGCCCAATGTGGGG  
CTTGATCCCAGGACCCCGGAATCATGACCAGAGCTGAAGGCAGATGCTTA  
ACCCACTGAGCCACCCAGGTGCCCTTCTTTGTATTTTATTTTAAACAAA  
CCTGAGTTATTTAGAATGGCTCTTTGCCCGCTCAAGGTCTGAGCCCAAAT  
CACATACACAATTAATTGCATTTTAAAACAAAAGGCATTTATTGATACT  
CCTCTAAGACCAGTTTGTGAATTATCTCATCCAGGGAAAGGTGTACAAAT  
ATCATCCTTTTTGTAGCAACAAGGGTCCGGTAGAGAGCAGAACAGAGCA  
ACACACAGAATCCAGCATAACAGTAGATGCCAAGCTTTTTTTTTTTTTTTT  
TTGATGCCAAGCTTTATGAGTATAAAGCCATCAAAGAGTGTAATAAAATC  
ACATTGAGCCTCGTTAAAGATTTTGTGACATTTTTTATAAAAGGCATTT  
CTTTCTCCATCCTTCATTCTCTCTCTGTCTCTCTCTCTAATGTAAACT  
GATGTTTTGCAACTCAAAATTTAGTGATGGTAATGGTGACAAAATGAAA

ACTTATTTTAGCTTGCCATCTAATAGCAAAAAAAAAAAAAATCACTTAATT  
CTCTCTCATACACTAAAGTCTTACGCTACCAATAGTGGAAGATGCTGA  
TCCAAGTGAGGATGGAATGTAGGGGAGAGAGGCTTAGACGGGTGAAGTGA  
TGGAATAGAATCTGCTCGCAGGTCCCGTCAGCAGTTTATACAGGAGCTC  
TTTGAGGGTATCGAAAATTTCTTAGCCATTCTTGCTACTGCCAAGTCCT  
GTTTGCCCAAGGTCACTGAAAGATTATATTCCTGGGCTCAGGAATAAAC  
TCAGAGTGTCTCTGAATGAGAAGAGGGGTGAGGTCAGTTTTTCAGACCACG  
TATGCCTCTTCAACCCAGGAGATTACATGATATCCTAATAAACAAAGGCT  
CAGAGTCTAATGGATTTCTTCATTTATGACCCTAAGCAGAATATTCCATC  
CAAGTGTGGATTTAATGAGAGGGCCCCAACTGGGTCTGGAGCCCATTG  
CATTTTGGAGTGCTTGATGCATGGCTCTAGCTTGTTGTTCCCATGGCAA  
AAGAGTACTGATGACTCATTCTCTAAGAGTATTGGTGACTCGTCTGCTTT  
GGAATCCCTAAAATGATTGGAGAAGTACATTGAAGATTGGGATAAATCCC  
TAATTTTTTTTTCTTATTTTTTTTTTTTTAAATAATGACTTATGTCCCTCAG  
ATCACTCACTATCCGCCCTAGGGTAAACCAAACATCTACCCATGAAGAGG  
TCATTGCTTTTTTAAAAAACGTAGATAGATACAGGGGGTTGGTTTCTTTT  
TTCTTCCATTTTAAATGAAAAATCATCTTGAAAGGAGACGGGGTTTTAAG  
ACCTTAGAACTCACAACTTCACTTCCCATTCTGAAGCTGTCTCACCATT  
CAAGAACTTATAAATATTATCAGTGACTTGCTCCTAAACAAAGTTTTTA  
GTGCTGGGACTCCTTGAAGGAATCAAGGGACCCCTTAGTGTCATATTTT  
CAGAACCCTGGACTTTGACCTACTATCCAAGGGGATATGTAGATATATA  
GATATCCCATTTTGGCAAATTCCTCGCTTCCCTGCGGGTTAGCTAAGAGT  
CCTCTGTGGTCAACATCTGGGAGACGTTGCCAGAAAGCCTAAATGGCTAT  
TATCTTATTTGGAATCTTCTCACTCCTTGGCCAAAAGTTGAAATAACTG  
GCCGACAAACCAGGAACCTTCTCGCAAAGAGGCATCCAAAGGGAAAGCCAA  
ATAGCTCATAAAATCTTTCCCTAGTCTGTAAAACAGTGAAAGAGACACTT  
AGCATAGAGTGCTGTTTCTTGGTCTCGTTATTTTATGAGGTCTCAATA  
AGTTTCTGGGGCTGCTGTAAAAAAGATTTCTTTCTAGTGGTTTACTAG  
GCTAGATCCCCACCCACCTCCCGCACAGCCCTCGCTCCGGCCTCCTCG  
CCACACCTCCCCTCCCTTTGTTTTTACAGAAGTTTTTCCATGTCCTGTGC  
TAGTCTGTCAACTGCCTTTTTTTTTTTTTTAACTGAAAATGCTTCTTT  
CTCTCATAGGCAATGTTACCACTGATGGGGCTTGTCATGGTTCAAATTA  
CAGGCTTGTCATGACCCTTATGTTTAAGCTTTTGTTAAAAGATGAAATAT  
GCCAGTAATGTTTCATAATTGTTAGAGGTGGACACTTCCAGGTGCTGTTT  
CCTTTAGGAATAGAGGTTGATTTCTCCAGGTGCTGGTTGTGCTAACATG  
GACCTCAGCTCTCAGACTCCTTCGCTTATTTACTTATTTGTTTGTGTT  
GATGAGAGAAAGAGAGAGAGAATGAGAGTGCATGAATGGGAGGGGCGCA  
GAGGGAGAGAATCTTACGCAGACTCCACACCTACTGTGGAGTCTGACACC  
GGGCTCCGTCTCATGACTTTGAGGTCATGACCTAAGCTGAAATCAATAGT  
CGAACACTTAACTGACCAAGCCACCCAGGTAGTCTGTCCGTCTCCTTTA  
AGAACTGCCTCCACTGGAGAAAGATGCCTCACCCAAGGCTGTGCCTTTT  
CAGGGCAACTCATACTCAGTGACTAATCATTATGAGGTATAAAGGCCAAC  
CCGCTCACCTTACTTCTGAACAACTCAGAAGACAATTCCAGCCCCTGGGC  
TTCTGTGGTGTGGCTTCTGCATAACTGCTCAGCATCTCCATCCACTCAA  
TCCTCTTCCCTTACTCTCTCTGTACAAAGAGGCTACTCCAGGAGCTCCC  
TGAGCATCCACCTGTGTACTACTCTCTATCTTGGAGTCAGCTTCTTGA  
CAACTCAGCCTGTGACAGTGGGTGCCAGGGATGACCTGAGAAAGCAGTCA  
CTAAGATGGGAGTTTGGAATGTGATCCCGTCACCCAGTTGGTAATAAGGA  
TCCCCTCCACCCATGCCCCTGGAAGGACCATGGAGCAGAGTGATTGTTAG  
ATTTCCCTTTCCATCAATGGTGGACTGGGGGCAGTGCATCTGGAAGGTAA  
TCCACTAGCTGGTGCAATGTATTAAGTCTTTAAAAATGCGGAAAGAAGAG  
CTACTGTGCGGACAGTGGAGTGGGTTGGCTATTGCTAATCTTGACTGACA  
CTCTAGAAAAAAAAGTGAGAGTGATGAGTTAGTAATCAAAAGCTAAGTGG  
GAAAAACAGAAGACTTCTTTGGTAGCATAGACAAAGGCTCTTCTGTCTC  
CAACAGAAAGAAAACAAAGCAGAGGACGAGGCCAAAGAAGGCTAATTCCC  
AACCAAATCAGGGTAGCTGTGCCAAGGTCAGGGCCCTGGTTGGAAAGAAT  
AGGGTCTTGACTCATGGGATGGAGACATCTGGGATGATGATACCCATAAA  
TCTTGGATCCCAGATTTTCTGAATTCTTTGAGTCTGTAGAAGTTATCC

CCAATCCCAATGGGCTAGGTTCTTGCCCCCTTGCTTAAAGCAATGCCAAGG  
CCTCTTTTCTGAGAAGCAGTGTTCACCTTTATGATCTGTGCCACCTCT  
TATCCTGGTCACTGGGCTAAACTAAGGATGTGACACAACACAACACAACC  
AGAGAGATGCTGGGGCTTCTCAGGAGGAGAAGGCCTATATCCCTCAGGAG  
CTGGAGTGCCTGGTTGGCATGTCTGGCAGGAGCTAGGAAAGCCTTGGAA  
CTGGATTATGGGGGTGCTAGACTAAGGATGCAGAACATAAATTTGGATAC  
AAGAGAGTTTCACTGAAATGTATGCAGTCTCCCAGAAAACAGCATTTAAC  
CACCTTGGCAAAGACTTTGGGGGATGGCATGAATGCACTGTTAGGATGGC  
TCCTCCATGCATGGGAAAGCCGTGGCCCCCCTAAGGGAGTAGAAATGC  
CTGAATGCCAAAAGCAGACACTGGGGAAGAGATAAATGGCCAGAGAAGGG  
GACAGCTTCAAGTGGCTAAGAAAGCCCACCTGGGAACAATACTCATGAGA  
CAGCCCAGAATAACCACCACCTTTCTAAAACAATAAAGACTACCCCTCTGA  
GGGGGCACCAGGCTCAGTAGTTGAGCAGTGGCCCTGCTCCGTAGGATGGG  
CTCGACGGGAGAAGAGGCTGATACAAAACCTGAGCTCAGTGATGGCAGTGA  
AATGGTGAGACCTCAAAAACAACAGAGGCCAGGTGATACTGCTTAAATGTC  
CCCAGCAGGTGGGTACAAATGTCATAATGAGATGCAAGGAGAGAGAGTGA  
CTGGGAAGTCCCGGCAGGCTCATGGATGTGGTTCAAAGAACACGGCAAAA  
TAAACGAGAAGTCAACAAAGGCATGCTCAACCTTCACAAACACAGTAAAA  
AAAAAAGCAGGTGATTAGGTGAAGCGAGTCACCCCAATAAAATGTCACAA  
GGCCTTGCTTGATATTTAGACTTGAGCCCGTGTTTTGGCCCTGAAACATAT  
AGAATGAGGAGGAAGCAGGATCCCCAGGAAGAAAAGCCCTGTGACTCCTC  
TACAAAGTGACACAGTGATGAATCTCCCTGTCTTTCTCAGTGGAACCAA  
ATACCATTTCTCCGGGTAAAGTACACACAGGGAAAAAGGGAAGCCTCAAAC  
ATTTTGATGACTGTGGGACCTTGGATCTGAGTTCACATAGAGAACCCACA  
CCCCTGAGGATAATCACAGCCCCCTCTGTTGGAATGGGAGCATAGGAGGAC  
CAAGCAATCAGTGGAGTCCTGGCTCACCTTCAGCTAACGGAGGATCCTCT  
GTGTCTTCAGCATCCCTGGGTGGTCATTTCTTCAGTCCCTGAATGTACAA  
ATGGAATAGATACACTTGGTATTTGCCCAATCCTCATAACAGGCTTGGCC  
TATGGGGCAGAGGAAGACAAGTGGAAAGCTCTGAAATTATCCCCCTTTCTG  
GACAAGACAATGAAACAATATCAATATCTCATCTTGAAAAGGAAGGCACA  
AATTAATGTCACCCTTAAAGATGTAAAGGATTGGGATGCCTGGGTGGCTC  
AGTGGTTTAGTGCTGCCTTCGGCCCAGGGCGTGATCCTGGAGTCCCAGA  
ATCGAGTCCCGCATCGGGCTCCCTGCATGGAGCCTGCTTCTCCCTCTACC  
TGTGTCCCTGCCTCTCTCTCTCTGTCTCTCATGAATAAATAAATAAAA  
TCTTTTAAAAAAATAAAAAAATAAAGATGTAAAAGATTAAATCAGATCAC  
CCTGGCCAGTGAGCCGAGAATGGTTTTTTTTTTTTTTTAAATTTTTTATTTA  
TTTATGATAGTCACAGAGAGAGAGAGAGCGAGCCAGAGACAAAGGCAGAG  
GGAGAAGCAGGCTCCATGCACCAGGAGCCCAACGTGGGATTTCGATCCCGG  
GTCCCCAGGATCGCGCCCTGGGCCAAAGGCAGGCACCAAACCTGCTGCACC  
ACCCAGGGATCCCCGAGAATGGTTTTATATTTTTTGAACAGGTACACTTG  
AAATGGTCATGTAAAGACCTAGATAATAGCCTCAACTTTTCCACTCGATA  
ATTAAAGCCTAAGATACTATCAAGCCCTTTACGGAAAAACAATGCCAACA  
CCTACATTAAGATATAGTCTTCGTACATCTCCATTTATTCAGGAATTTA  
GCTCCTGCAAGAGAACCGACAAATTCTAGAGGCTGGTCGTGGACCGCTGC  
AACTGAACCCAGTGGTAGCCCCAGTTGCAGATATTATGCCAAGTATGGT  
AGTTTGGCTAGAGAAGACTGACATGAGTCCTGTATATGGTATGTGTCATC  
ATTCCGGGAATGTATTCTGTTCCTGCCTTCGCAGAAAAGAGAGCTATAA  
ACTGTTTTTTTTTTTTTTTTTTTGTCTTGGAAGGGGCACCATAGTACATT  
TAGAGTTTTGCACTAGGTCTAGCTTAACTCTCTTACCCTCTGTCACAATA  
TAGACTAAGGAGGTCTGGACCATCTAGACATTCCACAGAAAAACACGTTA  
GTCCACTCTACTGATGGCATTTGGGTCGATCAGACCAGAAAAGCAAGAAAT  
GACTAGCCTAGTGGAGGTTTTGGTAAATAACATGCTCCAAAGCATAAGT  
GATAGAGCCTGTAAAGATACAGGAGCCTGCCATGTTGCTAGGGGACCGCT  
AGCACAGAGGTCAAGAGAACAGTCCCTGGCTGTTCTCTGCCAACC AAAGG  
ACAGGTGCTTAGAAATTGGAATCGATGTGATTGTGATACTGATGATATT  
TATAACTTTTTGGAGTTTGGAAAGACCTGGCCCTGCATCTGTTGTTAACCTC  
CCTATATCTTTAAGCCATTAACTTCATTATGCCATGTGGCAATGTGATGC  
CTTGATTTTGAATATTGGAACCTTGATCAGAATGTGGGCTTGGCCTCCTG

AGTGGTTGTGAAATCCTGAGCATGTTATTTTCATATCTCTCTGAAATATGT  
GTGTTTTATCCTCTGTACTGATCACTTTGGATTAGATAATATCTAAAATA  
GCTTCCATCTTGAAGTAACTGCGTGCAGTCTATGATGGTGGCTACCTACC  
ACGTGTGGCTATTTAACTTAAGCTAAATTAAGATGAAATTAAATTGATT  
AAAAATTCACTTCCTCTAGATCCACCAGCTAGTGTTCAATAGTCACTTGA  
AGCCAGTGGCTACCACGTTGGGCAGCACAGATAAGGAACATTTCCATCAT  
CATAGAAAGTTCTATTGGCAGTGCTGCTTTATAATGCTGAATACTAAGAC  
TAAATATAGTCTTTTTTAGGTCTGATACACATGCATAAGTAAATATAC  
ATAAAATAATAACTAACAGGGTACCAAATCAACCATTACAAGGGCTTAG  
TGCTAGATGTATTTGTATTGCTCAATTTTCATCACACCACACCCCTGTGA  
AATAGTTACTGTGATTATGCCATTTATAGTTAAAGAATCTATTTAGTTTC  
TTAAATTGATTAAAGACTCTTGCCCCATGCCTGCCTTTGGCCCAGGGCGCA  
ATCCTGGAGTCCCGGGATTGAGTCCACGTCGGGGTCCCAGCAGGGAGCC  
TGCTTCTCCCTCCTCTTGTGTCTCTGCCTCTCTCTCTCTCTCTCTCTG  
TGTGTGTCTATAATAAAATAAAATAAAATAAAATAAAATAAAATAAAAT  
CTTAAAAAAAAAAAAAGAAAAGACTCTTGCCCCAGTCACACTAGGAAATGG  
TGGAGTGAGGATCCAACCTCTTTCTGAGACTTCTTCCTTAAGTGTCACATG  
CTACTTTCTTCTGAGCTTTGATGTTGACGGCTTTTACCATGTGACTGTCT  
TCTGAATTCCAATATGACAGATTCTCTTTTTTAAATTTTTTTATTTTTT  
TATTTGAGAGAGAGAACAATAAGAGAGTGAGAACAAGAAATGGGAGGAAGG  
GCAGAGGGAGAAGGAAAAGCAGGCTCCCCGCTGAGCAGGGAGCCAGACAT  
GGGGTTGGATCCCAGGTCCCTGGGATCATGACCTAAGCAGAAGGCAGATG  
CTGAACCGACTGAGCCACCCAGGGCCCCCTAAATGACACATTGTTAAGA  
GCTGGAACCTCAAGCAGCTGGTAACTGGCTTGCAAGCCCTTGGAGGCAGAG  
ACTTGCTTAGTTTCTTAGATCTCATGGCAGCATGTTGGAAATAAAGGGAG  
CATTGCCCTGGAATGCTTCCCTTCCCTCTGGCTTTCAAGTTAATTATTTTC  
TGCTCAAGCTGACATTTCTACCACTTTGTGCATCAGTCTCCCCTAATCT  
TCACACATATCCTCCTTTGTTAATACAGTTCTTTTCTTATACTGCAGTCT  
GAAAATAGCATAGATGTCTGAATGCTGGGCTATTCTATTAATTTAATAAT  
AGCATAGATGTCTGGATGTTGTGTTTTTCTGAAAATAGCATAGCATAAG  
TGCTAGTCTGAAAATAACATAGATGTCTGGATGCTGTGTTATTCTATTAA  
TTTCTTATAATTCCAATAATATTCTGCTTTTATCCTATGCTGTTGTAAA  
AGTATGCACAAGTGATGTGTTTATGTGAAAGAAAATGGCATTACTTTTA  
GGATTGGAAGTTCAGAAGATTTCCCTTGACACGGACAAGTTGAGAATTGAA  
TATTATGTTTGGGAAGGAAAAGGGGAAATCCCAGGTGACAGTTGTGAAA  
CCTCAATGATTGAAGTTCAACTGGCTTTAAATATTTTTTGAGATGAAATG  
GTACTGCACATTTTGAGGGACAATAATATTGCCTAAAGGCAAACCTGGCTT  
GGAATCAGAGGACCTTGGTTGGGTACTAACTCTGCCATTCACAGCTGTG  
AGACTTTTGGTGGGCAATTTGACTACTGAGTCTCACTCTTCGCCTCTGAA  
AATGGTAACCATGGTAAAACGGGCCTTACCTACTAGAGTGGATGCTGTTG  
TGCATGGCCTTGATTCTTCTGTGAGACCAGGGAAATCATTTCCCAGGT  
GTTGGAAGTGTGCTGCTGACAGTTCACAGATAAATCTGTCTTCAGGAA  
TTCCCTTCAGCCTAAAGGAGTCATCTTGCCCAAGGTTCTACACCCTACCC  
AAGAGCAGTGCACATCCATTGACTGGTATTTGTGGCATACAAAATCCAAT  
ATCCTTATCTTAATTTAGTCACCTCTGATTGGCCATTCCAGCTCCAGAGC  
TCCCTTTGGGATCAACTGATGCCTCTGTTATAACTACACTGCAGTTCAGT  
TCCCTCTCTGCCCAATCCTGCTGTCCCCACTCCTTTATAGATGGCATCT  
CCAGAACCCTCCCCAACTAACACACATAAGCAAATCCCCTAGATCTATG  
CTGCAAGAAAGATTTTTGTTTCTTCCCTCCCATCCCACAGACATCAAAT  
CTAACATACTATTAAATATTTTTGTGTGTTTTTATACTGGAGCATTTTG  
TTATGAAATATACAAACTAGGAGACAATTTTGAAAGGCTTGACTCCTTAT  
GTGCCAACAAAATAACTGCACCTCTGGATACAGCCGTTGGATATTTAATAT  
GTTGGCCATTTTAGTGGGACCTAAGGTCAAAGTCACATAACACAACCTAC  
TTTAGAATTTTAAACAATATCATCTGAAAAAGTTTTCATTAATATTACC  
CAAGATACTTCATGTTGCTTGCTCTGCATTTCAAGATCTCTTCCCAGCAC  
GCATAGTCAGAATGGGTCAATTCTCTCCTGGCTTCTGTGTCAATTTCTTAGA  
AAAGATTTTATTTATTTATTTATTTTTTTAAGATTTATTTATTTGTTTATG  
ATAGACATAGGAGGGGGGCAGAGACACAGGCAGAGGGAGAAGCAGGCTCC

ATGCCAGGAGCCCGACGTGGGACTCGATCCCGGGACTCCAGGATCACACC  
CTAGGCCAAAGGCAGGCGCTAAACTGCTGAGCCACTCAGGGATCCCCTAA  
TTATTTATTTATGAGAGAGAGAGAGAGAGAGAGAGAGAGAGCGCATGCATAA  
GCAGGAGGAGGGGCAGAGGCAGAGGGAAAAGCAGGCTCCCCACTAACCAG  
GAAGCCAGACATGGGAGTCAATCCCAGGACCCTGGGATTCCAACCAGAGT  
CAAAGGCAGACGCTTGACCCACTGAGCCACCTGGTACCCATTCTGTGTCA  
TTTTGTAAAAGTTGGGCACAGTTATTTGTATATATACTTCTCTTCCCCAA  
TTGGTTATAATGTTCTGTAGGGCAGGAAGTATATGCTATTTCATATCTTA  
TTCCCCAGAAATGAGTACATTACCTTTCACCTTAGTAAACTGTCCAGAAAT  
ACTATCTGAATGTCAATTTGAGTAGTTATTTTGTGTACTTTGTATGTAT  
TTATAAGGCCAAATTTCCCCTATTTTCACTGAAGACTACAGAAAAGAGAA  
AATGTCTTTAAACTGAAACCTGAGAGATTTAGGTGTGATATAAAATATTT  
TTTGAATTGTGACTTTTGTGTACATATTAAGTCTTAAACATATGCTATTTG  
CATATGCTATTAACACTCAAACATTTATGTCAATTTGTTCTTGACAAAGG  
TGCCAAGACTATTCATTGAGGAAAAGATAGTCTTTTAAACAAAGATGCTG  
GGACACCTAGATATCCACCTGCAAAAAAATTAAGTTGGACCCACACCTC  
ATACTATTTACAAAACCTTAACTCAAATTGTGGATTTAATGACCTGAATTT  
AAGAGCTAAACCCATATAACCTTTAAGAAGAAAATATAGGGTTAAATTCT  
TATGGCCTTGATTTGGCAATGAATTCTTAGATAAGACACTTAAAGCAGG  
AGTAACAAAAGAAAACTGGATAAACTAGATTTCAACCATTAAGAACTC  
TCATACATCAAAGGACACCATCAAGAAAATGAAAAGACAAGCTACAAAAT  
GAGAGGAAATATTTGCAAATCGTTTATCTGATAAGAATCAAGTATTCTGA  
ATATATAAACAATTCTTACAATTCATGACACAAAGACAACCTCTTTTA  
AAATGGGCAAAAAATTGGACTGAACATTTTTTTTCAAAAAAAGAAACAAA  
TGGCCAACAGGCAAATGAAAATATGCTCTGCATCATTGGTCATCATGGTG  
ATGCAAATCAGGTCCACAAGGGGATACCATTTACACCTACTAGGATGGC  
TATAGCTAAGAAGTAATAACAAGTGTGGCAAGGATATGAGAACTGAAA  
CCCTCCTATGCTACTGGTGGGAATGGAAAATGGTGCAGCCACTATGGAAA  
CAGTGTGGTGGTTCCCTCAAAAGTCAAATATAGATTACCATGAGCTCACA  
TTCCCTGCCCACGTATATATCCAAAAGAACTGAAAACAGGAACGCCAACA  
GGTATGTGTGCATATATTCAACAGCCAGAAGTTAGGAAGCACAAATGC  
CTAGATAAACAGATTATAGTATATACATGTGATACGATATGATTCCATCA  
TAAAAAATGAATGATGTATCAGTAAATGCTACATGGATGAACCTCTAAGA  
CATGCTTAAGCAAAGATAAGCCAGATGCAAAAAGTCACATATTGTATGAT  
TCTATGCACATTAAACATCCAGAAAGGATAAATCCATAGAGACAGAACAC  
AGATTGATGGTTTGTTCAGGGGCTGAGGGGAGGGTGGACTTGGGAATA  
ATTGCATGATGGATTTTATTTTGGGGTGATAGAAATATTTCAGAACTAGG  
TAGAGAGAGTGGTTGTGCAACATTCTGAATGTAATAAATGCCACTTAAAA  
ATGGTAATTTTATGTATGTGAATTTAACCACAATAATTTTTTTAATGCT  
TTAAAAGGCTACTAAGGAAGGTTTAAATTTAAAAAAATGTTAAGATTTT  
GTTTATTTATTCATGAGAGACACACAGAGGCAGAGACATAAGCAGAGGAA  
GAAGAAGCAGGCTCCCTGCAGGGAGCTCGATAGGGGACTGGATCCCAGGA  
CCCCGAGATCATGACCCAAGCCAAAGGCAGACACTCAACCACTGAGCCAC  
CCAGGTGCCCCCTAAGAAAGGTTTTTAAATGTCTCATGTGTACATGAGAT  
TGTACATGATTTGTAAACATTCTGTTGATCTTAAGTCAAGGTAACATGTT  
ATTTGACCTTCCAGGTCACTTGTAAGTTAGCAGAAAAGCAGATCTAAGTAT  
TATTCACCAAGACCTTGGCCTCTTCTATTTTGGGAAATATAAAGGGTGGC  
ACTTCCCTGGTGTCTCCTGGAATTAAGATTGTCCATGTGACTAGTTCTGG  
CCTGGGAACCTGTGAGCAGAAGATACTTGCATGATTTGAGTAGTGAGAGAA  
TCTGCATGTTCTCTTCCCTCCACCAGGATCGTGGGGAAAAACGAAGCATGG  
GTTGATATAGAGGTGTTACAACACTGAAACCATCTGGAATGCCGGGCTCC  
TGAAGGAAGATACCTGTCTCCTGGACCTGGACCTGCAGTAACTTTAAAAAT  
GCAAGAATCTGACTTTCACCTGTGTCAAACCACTGAAATGTGGGCAGTGCT  
CCTTTATGCCACAGAACCTAGCCTGTCTTCGTTACATAATACAAAGTGG  
CACATGGAAAGAAAGTTTGTATTTTTTAAGATTGCTCAAGTTAGGTCTAT  
GACTCCCATGAATAGGCTGGTTAAAAATACATAAAACAGGGGCACCTGGG  
TGACTCAGTTAAGCATCGGACTATTGGTTTTGGCTCAGGTCGTGATCTCA  
GGGTCTGGGATGAAGCCCCACGTTGGGATCACTGCTCAGCTGGATGTCT

TTTGGAGAGTGTCTCTCTCTGCCTCTCCCACTGTGCTCGTTCTCTCTGTG  
TGTGTGTAAAATAAATCCTAAAATAAACAAATAAAATAGAAATTACATAA  
ATCATCCCGGTACACAGTCAGTACTTAATAAATGTTAAATTTTAGAGGTA  
TCGCTTATAATACTTGAGACAAACAACAAATGAGAACGTAACAGAAGGAG  
AGAGCCCGCAGAGATTCTTCCCTAAAACATTTTGTAAAAGTTGATGCCAC  
TCAGAGAAATGCTCTGCATAGTTATAGCACACATGTCCTCTTTCCTCTGC  
CTTCTCGTGTGGGCTGTTTCATCCTCAGAAATTGCACAAAACCAGGAATAA  
ATATCTAGGTGAAGTGAATATCATCTTTTTTAAATTTTTTTTTTAATTTT  
ATTTTTTTTTTTAGAGAAAGAGAGAGTGGGAGGCGTAGTAAGGGGCAGAG  
AATGAGGGAGAAAGAGAGAAAAATCTTAAACAGACTCCACATCCAGCAAGG  
AGCCTAACACAGGGCTGGATCTCATGACCCGGGGATCATGACCTGAGTAG  
AAATCAAGAGTCGGATGCTTAACTGACTGAGCCACCCAGGAGCACCTCAC  
CTCTTTCAAAATATAACCTTGACTTATTTCTTAACTCTTTAAGAATATTT  
CAAAGTCACGTGGGTGAGATTATGAGATGCCCACCTCTAAGGAATTATGA  
AGATATCCTTAGCCGAAGGTAGAATCTGATTTCTGGTTGTGACTCTTTGG  
AAGATTAATACCATGAAGTCCTTTGTCCCTAAAGAAACTGCCATGGAACA  
CTGTTTCATTTATCTGCAGGATCCAGAAGAGAAAGTTTAGTGAGTTATCTA  
AGAATTTAGACTGTGGAGTCAGAGGACCAGGTTCAAAGTCCAACCTCATCC  
ACTTACTCAGAGTGTGGCCTCAAGAACTTAGTTGACCAGTCAATGCCTC  
TGCTTTGTCTATGAAATGGGAATACTTATTCTACTTTATAAGGATGT  
TGTGAGGATTAAGTGGGCATATGTATCGAGTGTTTAGAGTAGTCTCTGGC  
ACATGGTATGTCCTGTGTAACACTTTGCTAACTTTGCTAAGGAGCTCATC  
AAAAATACCCCATAAACCTGAGGACTGGCTTGGAAGTCATGCCAGAGTTCA  
AATCTTGCTTGCACCTCTTACCAGCTGTGGGACTTCAGCTAGTCTGAGCC  
TTTATTCTTCTCTTGAGTGAACAATATTTGGGGGACGGACCTAGCAAAAT  
AAAGTGTATAAAATAACTTAGCCCTATGAGTGCTCAATTCATAATCCTTTC  
CCTTGAAAGACCATCCTCCTACACCATGAGCATAGCTACAGAGGCCATGC  
ATGGGTAGCTTTCTGTCACTTACAAACAGACCCTTCCTGAAGCTTCAGT  
TAGAAAATGTAAGATCTTACAGACTTACAGAACTCACATAAAGTTTCAGTA  
GTGGAATTAACCTCAGATACAGCCAGAAATAAGTATCCAAGTGAAAGCAA  
AAGCGATCTTTCTGCCTTCCCATTTGGCAGCCTCTGCTCTATTTTCTGCTG  
GCTTCCTTCTCTGTGGTTATGCTTAGAAGCTCCAGATATATTAGTTTAAAT  
AACACACGTGGAGTAAGAACTTCTTCCTGAGAGTGCCGACAAAAATCCCA  
GCATTTGCTTTCCTTGGAATTAGCATGATCACAAGGACACCTTTGAATCAG  
TCACTGTGATCCGAAGAAATGCATGTGTTGATGAGGCTGGGCTAGGCAGA  
TGGTCATTTTTTCAGTGCCATCCCAAATGCAGAACCTGAGAATTCCAAAGT  
GGTACTTTCCAAAAGGAAATGCAACTATTTTTATTTGAGAAGGGAGAATG  
GAAGCTCAGCAGACAAATGGGGCAGCTTCCACTGTTCTCAAAGGCATC  
AGTAGCGTAAAGAGAAAAATGAAAGGGGATACCTGGCTAAAGATTCAGAA  
GAGCCCGGCATTAGAAGTTGCAACCAGATTTCCGTGTCATAAACTCAT  
GATGAGACGTTAACTTGTGTGTCCAGGGGTAGTAAATGGATTTTCCACTG  
CTGTATTCGGAGACCCTTGCTGCTTCCATTTGTGAGCAGCTAACAGGA  
GTCAGGCTTGGGGTTTGTGGCTCCATGAAACAGCCTTGTTCACTGGATTT  
TATAGGAAATAAATCTGAGACCTAAATGTTAGCAACGAGAGACTGGAATC  
TTGAGGTATCTATTTGCTGTAGAACCAAAATGAAATAAATTAATCAGTAA  
GTATTTGTCTACAAGCAACAGAAAAACCCAGATTCAACTGGCTTAAATAA  
AAAGAATATTTATTTATTTCTTTAGCTATAAATATAGAGATAAAGCAGGT  
TCTGGGCAAGATATGATGTGCAGTTCAATGACGTCAGTGAGGATTCAGAT  
TTTTTTTTTTTTTTTAAATGTATTTGCTTTTCTCACTCAGCATCTGCTA  
CGACTTAAGATTGCTGAGTCACAAGATGGCTGCAAGTGGCTTCAGGCTCCC  
TGCTCTGGTCCAGCACAAAGAGAGAAAAAACTCTTTCCAAAACATGAAACA  
TAAGTTTTTTCATTTTGGTCTACCTGGGTAAAGTCAAGTCAGACCATATTA  
GGAGCATACTTACACTGAAAAATTTATTCGTTGTTTATCTGAAATTCAAAT  
TGGGCTGGACATCCCATATTTTCTGGCAACTGGAGTCCCAGTTGATTG  
TGACTAAACCCAAATGTCCTGTAGAGGGAGGTAGGGAGGGCACAGGAAAC  
AAATCAGGCTGCATGTCTGTCTCAGTTTTAGAAAGGAAGAAGGCAAACCTG  
GATGCTAGAAATGCAACATCAGATCAGTGTCTGTTGTACCAGATGTCAG  
TTAAGGGATTTGGGGGGAAAAAAATTCAGGATGAGTTGCTTTATCCAA

CAAATAATCTCAAGGCTTAAACCCTGGATTAGTAAGTATTATAATTCAAT  
CCAATTACACAAATATTTATTTAATGCCTTTTATCAACAAGGCACTGTTG  
AAGATTCTGGAGGTCTATTCAAACAGTTTCCTAGGTGCTTCCAAAATATT  
ATAAGAGAACTAACCAAGTGAGAGCACAAACGTGAAGGGCACTGTGAGAA  
AGATCCAGAGACCGCGGAGTGCCAGCGTGATGCTCTCCTGAAAGAACCAG  
TTTTGCAAACACACATTAAAGGGTAATGGATAAGAAGTGACATGATAGCA  
CCATGGGAGATAAAGTGGGGAAGGTGATTTGATCTTAGAGATATTTTTTA  
CAGAGAAATTCGGATCCAAATGAGAAAGCTCCACAAGCTATCTTGTGGAA  
AATACGGTGAAGAGGATTTTTTCGAGCAGTGACAGGAGTCAAGCTGCATTT  
CAAGGAAAATTAGTCTGATAGCGACGTGTGGGCTGGCTTGTAGTGGGAGG  
AGAATGGAGGTAGGGAGGCCAGCCATGGGATGGTCTGCAGCCATGCCAGC  
TCCAGGGCCCTCTTTCAGTAACCTGGATTTTATAAAGGCTACTTTACCTT  
TATAGAATGAAATTTCTCTGCCTGCAAACAAACCAGAAAAAGAACTGTAAT  
GCCCTAAATGTAACATATTTTATTTTGCAATAAAAAATCTTCTAGCACAGA  
GTCATTAAACTACCAAATACAGCTCTACACCTGTTTTTATATGGCCCATG  
AGATAAACACGATTTTTTAAAAATTTTGTTATTTTTTATTTTTTGAAAGTT  
TTTATTTCTTTATTCATGAGAGACACAGACTGAGAGGCAGAGGGAGAAGC  
AGACTCCTCCCAGGGAGCCCCGATACGGAACCTTGATCCCAGGACCCGGGAT  
CATGACCTGAGCTGAAGGTAGACATCCAACAACCTGAACCACCCGGGAGTC  
CCTAAATAGTTATTTTTTAAAAATCATTATGTGGGTTTCTACCCAGGATCT  
GTGATGCCCTCTTGGCCCTCAAAATCTAAAGTATTTACCATCTTGCTCTG  
TGCAGGAAATATTTGCCAACCCCTTATTTTCAGCAATGGCTATGTAATTTG  
TGTGACTCTGTGCAAAGTGAAAATGCAGGCTCCTGACAAAAATTATTAAT  
TATTAATTAAGACAGTGATAACAGAGCAGTCAGCCATGAGCTGGGTCCAT  
ACCCATGAAGCCAACCCTAACTGTTCTAGCATATAAAATACTTCGATGCCA  
CTCTGCTACAAACATAATAAACTAGTCAGACATGTGTACCTATGAATGGA  
CCAGGTGCAAATACAGACAGACACAAACAGGGGCATGCACACTGTCCTGC  
CCTTTGTGGCAACCCAATACAAATGTGTTTTATTGGCAACTCCAGTACCA  
TGGTGATGTTTCCATTCTCGGTGTGATTTTTCTAAACTGGCAAAGAATAA  
TTTGGGAATTTACAAATAATGCATGGTATGACCTCTCTGTAATTTACATG  
AAGATTGCATTTCTGGAATATTCATGAGATGTTAAATAAAACATAGTGAA  
CTGTATTTATGTGTGAAATGGAAAAAGCTTCTAGGCTCAGATAACTATTA  
ACAGGTTTCATATGATTTTCAATGTTTTTTATGAATGTTCAATGAAATAT  
TTGAGGGATGGTATGGGATGCAGGGCACTTCTTTGCTATGAAACGGTGCC  
CAGCTTGGCAGAATGAGCAGCATTATGGACCTCATGCATGCAGGGTCACT  
AGAATCTCCAACACTTCATATTGTAACACCTCAAGGTGCCCCGCGACCATT  
TTCAAGCCACCCTTTAGCAGGTGGTGCTACCTCAGTAGAGAACAGTTCAT  
CTTGAGGATCTGTTTATAATTAGATATTGAGTGGTAAGGGTGAGATAGTA  
TACAAATGGAGTTTGGGCCCTTGGCTATTGGTTGTAATGGGGAGAACATT  
CAAGGAAAAATGTAAAAGTGAAAACCATGATCTCTTGCACTGTAAGAGCC  
CTTTTAAATGTATCGAATCAGAATTGCTTAGTTCTCACTTTCTTCTTG  
ACGTCTCTTCAGGAAGGCAGGACAAGCCTAACAATACAAATACACTAGAT  
CTGGGCTGCTGGGGTGGCCCAGTAGGTTGAGCTTCTGACTCTCGGTTTCT  
GCTCAGGTCATGATGTCAGATTCTTGATCTCAGAGTCATGGTTTTGGGGT  
CATGAGATCAATCCCCATATAGAGCACCATTGCTTGGCATGCAGTCTGCTT  
GAGATTCTCTCTCTCCCTCTTCCTCTGCCCCCTTCCACTTGCACTCTCTCG  
TTCTCTCTCAAATAACTAAATAAATCTTTTATATGCATGTGGGTGTGTAT  
GTGTGTACAGTAGACCGATGTAGACTTAACCCTCTTTGGCATTATTTATT  
TTGCATTTTCATAGAAATGCAGCAGATTTCAGCATGAAGGATAAGCAAGTGAG  
AGCTTAGGGAGATTTGACCCCTGCTTCTTCAGACTTCCCTTGAGGTCACCTT  
GTCTGAAATAGGAGGCCTCCTCTCCTATGATTCAGTTTTTGCTTCATGTT  
CGAGGAGAACGAGCTCTCCTGTCCAGGCAATGTAGTATACGCCAAATCAC  
ATGTATACACATTATTTCTGGACTTCTAGGATTTCTATATAATGAAGCAA  
ATCATGTCAATTCTTAAGCCTTGGAATGCCATCATAGTGAAATATTTAA  
GTGGGTATAACTCAACCCACTTAAATATTTTTTATTAATAAATGTATATTTA  
TTTCAGAGTTAATTATTAACACTCATTTATATGTAAGACACATCGTTTGG  
GAATACATATAAGAATAGTCTGAGACCCAGAAAGAGTGAGCAACTTGCCC  
AGATTCCCATGACATACATTCCCATGATAGACCCAGGGCTGGAATTCGCG

TTTTCTGATTCTTAATTCTGCATTTCTCCCTCATGGGTAAACAAATC  
TGCTTAGCAACTGCTTTGGAAAGAACACATTTGAACTCACAGATTGGAAG  
AAGAGAGAAGATCAAGAATGATGACACCAAGTTCTCTTCTGATTCCAAA  
AGGCACTCACTTGGCACTCCTCTCGAACCGAAGGAGAGAGGGTAGTTCAC  
AGGTAGTCCGTGAGAACTAATTGCCAGTAACTTCGAGAGTATTCATATCT  
ATACTTATGGGGAACCCATGGAAAACCCAGAGAAATGAGACACTAGAGTG  
TTTTTAAAAAATGTTATTGTTGAAACAGGCCCAGAACCCCACTACAGAGC  
ATATAGGTCTGGAACCTGGCAAGACCCAAAATTAATGGTATCGTCATAAA  
GTTTATATATAATATAATTTCTTAAGCCATGCACCAGGAAGGAGGCTCAT  
ATACAGTAACCAACTCAGCCCACCATAAATAATCCATGTTAATATCCTA  
AGAGAGGTCACGAACTAGAGTAATGTGCTGACATCTGGCTGCTTCTGGCA  
GGATAGGCTATATGGTATAAACAGATGGCCTTTAATTAGTGGTGGGTTGT  
CTCAGCAGAGGGCAGCTTGGGCAGGAATGGTTATTTGGATTACCCACCTC  
ATGCCTGGCTCCTAGAACTCTTGGCATATTGTCAGAAGTGCCACTGTGGT  
TACTGCCAATAGGTCTGATGTCACCGGATGGCAGCCTCTTGGGCTACCAT  
CGTCATTGGAGGGAGGCCTCTTCGGGAGAGTTTCAGCAACGCTGTCATGG  
AACAAATAAGCTGGAGAACTAGGGGGGGATGGACAAGGGTGGAGACAAT  
CCATCAAATAAACTTGCCCTCAGGAGAGTTCCCTACTGAAATCTTTGTGA  
TTGGAAGTTGCAGTCATTGCTTTTTCTTTTTGAACTCACCACACTTTGAA  
CCCTTTCAGAAGTAGAAAGAGATATAAATGAGGAGGTGAAGGTTTAACT  
TGTTTTCTACTACATGTGAGTTAAATGGCCCATAGGTCAATTATAAACAGC  
CAAGCTGATGAAGGATCACAAGTTCTACTGCCCAGATATAAACAAATCAA  
GCTTCTGTTTTCAGATATAAAGAGAAAATGACTTACTGTGTCCAAAATGG  
AACACAATAGCCAACCGTGTCTTCAATTCACCAAGTCCTGAAAGTCCTGA  
GAACACTTGGATCCAGAGCAGAAGGAGGTAGGCGACTCTTCTGAATTGGA  
GAAAGTAAAATAAAATATTCTGTGGTACCTGACCCCATTTTCGAGAATGG  
GATACTTGTGTGTCTTCGGAGCTAGGTTAGTTGTTGGTGAAGACCAGATC  
CAAGCTCTGCGATCCACAGTAAAAGCATGGACTGATTTGAGGACATGTAA  
GGATTTAGCCAATTTCTCTGCTGAGTTTTTCCAGCGATGGCCATAGAGTTT  
ACTTCTCAGTATGTGATGGTAGTGGGAATCACACTTAGCCAACTCAGGTG  
TTCCCAACCTGAACAGAAACAGAAGAAGTGATCTGATGTGTTTCCAGAAC  
TTTAAGAAAATACCTCCATTCACTGGTCAGGTTCTTCAATATCTTGCTTA  
ACGACTGTTAGGAGTCACGGTCACTCTGATGGAGTTTCCAAGACTTAAG  
AATTGACATGATTTGCTTCATTTTATAGAAATCCTAGAAGTCCAGAAATA  
ATGTGTATACATGTGATTTGGGGGTATACTACATTGCCTGGACAGGAGAG  
CTCTTCTCTTTGAACATGAAGCAAAAACCTAATCATAGGAGAGGAGGCC  
TCCTATTTTCAGACAAGGTGACCTCAAGGAAGTCTGAAGAAGCAGGGTCAA  
ATCTCCCTAATCACTGGGAGCTTTATAAGACCTTTGGGAAGGTATATAGA  
GAACAAGAAGAATCTGGTCAATAGAAAAAAAAAAGTTTTCTTAATCATA  
TGTGGAATATCTCCAATCAAATATTATATTACCTGGGCCGAAATACCAA  
GGATAGGAAAGATTGATTGGAATGATTGGAATGATAGGAATAATTGGAAG  
ACTGGAATGATTCTATATGAATTTTCATGGATTTAAGCTGAATGTTACCT  
CAGGTCAAAAGTTATACAGGTGAGGTCAAGGCCCAGAATGTTCTTGTTG  
CCTAAGCACTTTCACTATTCTTCATTATTGGGATAAACTGGAAAGAAACC  
TGAAGATCCTGGCATGAGTGTTGACTCAGCAATTACTGACTCTGTCACCA  
TGCAAGTCTTCTCTGTACAAGGGAATTATGTACACATTTTATTTGTTG  
TTCATTTAATTGATATTTAGGATATGCCTTCTGTAGTTTGAGCTCCATTT  
TCCATGTTAGGAATGCTGCAATGAACAAAACAGAACCCTCACTTTCACGG  
ATCTTACATTCTAGCCAGGAAGCTAGGTAATAAATATATTAATAAGTAAA  
TGCATAACCTGCAGGATGTGATAAAAAGGCAGATACCACAGGGAAGAGGG  
ATGGTGAAGGACCAACGTGGTGGGTGGCATTTTGGGATATTAGGAGAGT  
AAGACCTCTACCAATAAAGTATATTTGAGCAGGTATCAGGATGTAGTAA  
CAGAGGAAGACATGAGGATATCTGGGAATAGAATATTCCAAGCAGAAGAA  
ACAGCAACCATAAAGGCCTGGGTGTTTGATGTGTGAAAAGAAATTCCAGA  
AGGTGAGTAGAGCAGAGCAAGCCAATATCCAAGGAATGGAGATGGGGTC  
AGATAGCAGGTGGGGGACCCAGGTCACATGGAGCCTCATGTACATTTTTC  
CTGTATGATCTTCAAGTGAAAGACTATTTCCACATGTTTGTAATTTTTTT  
TAAGATTTTATTTATTTATTTGACACAGAGAGAGAGAGAGAGAGAGAG

AGAGTGTGTGACGACCAATCAGGGGGAGTGGCAGGCAGAGGGAGAGGGGAGA  
 AGCACCTGCAGAGCAAGGAGTCTGATGCCTGGTTCCATCCCAGGCCCTTG  
 GGATCAGGACTTGAGCAGATGCTTAACCAACTGAGCCACCCAGGGGCCCT  
 CCGCGTGTTTGTGATCTGTAGAGTTCCCTGAGCGCTTGCTCTGTGCCAGG  
 TCCTGTGCTAAGCGCCTGCCTTGACTCACATCATTTACTGTCACTACAAC  
 ATCAATGCACAGATACTATGATCCCCCTTCACAAGTCTGGAGACTTGGAC  
 TTAAAGGTTCAACCACTTGCCACAGTTGCCAAGCTGATAAGCACTGGAGA  
 TTCCAAAGTAAACAAGACTGAACCACAAAGGGGTAAAAGACTCGCCCTG  
 TTGTTTGAACCCTCCTTCAAATTCAGCAGACCTTAGCCTTGGCTGTGC  
 TCTTTTTTTTTTTTTTTTTTAAAGATTTTATTTATTTATTTCTGAGACACA  
 AGAGAGAGGCAGAGACACAGGCAGAGGGAGAAGCAGGCTCCCTCTGGGG  
 GCCCAATTACAGGACTCGATCCCAGGACTCTGGGATCACAACCTGAGCGGA  
 AGGCAGATGCTCAACCGCTGAGCCACCAGGGGCCCGGCTCTGCTCTTCT  
 TAGGCACAGAAGCAAGATAGAGGCCAAACCAAGAGATAGAGCCCATCTCTT  
 TCTCCGGACACTCACTGAGCTTCTAAACTGCTCATTCCCAAGAAGCCTCA  
 GGTCTTTGCTGGCCCGAGCGGGTGTTCCATCGATGCCGAGGACCATGC  
 TGAGCGCTGAGAAGCCCTCTGTACTCGTCTCCCCGTGTGGTCAGAGGTGG  
 AGGAGAGTCTCAGCTGCAGTGCCAGGGACACACCTCTTTGTCAGGAACAT  
 GTAATTAAGAAAGAAAGAAAAGGGGGAAAATGAAAAAAGAACGAGCAA  
 AGAAATAGCCACCCACCTCCATTCTCCTTAAACACATGTTTCATGGGCACC  
 GGTGCACACACGCACACACACACACACACACGCAGGCGTGCAAAGTCAGC  
 AGCCGTCCATCACTCAGGTCTCGGGATTCTGATGAAAACATTTTCCACC  
 TGGCACAGTGAGGCACTAAACACCCCTCCAACCCAACCTGAGACTTGGAC  
 CGTCAGTGAGGATATTTTTTAAACCATGACACAGAGGAGTGTGACACACT  
 CGGTTTTCTCAGTGGGTGGGTAGAGCGCTATTTTCATGTTGTTCTTGTAC  
 TGAGCCCAACATTATAAGTGTGCACTTTATTACTACACCGAGAATGCTCT  
 GCAGCCAGACCTAGCACAGTGTGTTCCCGGGGAGGGAATGGCAACCTGAA  
 CTGGAACAGAGAAGGGAGAGGGGAAAAGTTGCTGGGGACACTGGTGACCT  
 CCGGCTTACTCCCCACACCCACCCCTGTGCGTTCAGTTCACACTCAGCA  
 GTAGATGGAAGCGTCCCTATTGCTACTTCTGTTACTCTGTATCCATCGGG  
 GCTTGTCTTTGGGAAAATTCTAGATATTCAGATATTTGGTGATACCTAAC  
 TAATTCCTTAATGGCTAGAATTCACCCCCCCCCCACTCTCCTACTCTCCT  
 CTTTTCTCTTGTCCCTAATGGGTGACTTTTCTCAATATCCCATATAAAAT  
 TGAAGACAGAACCCAGCAGTGAGTAACCCAGTCTCACTGTTTCAGATGCAA  
 GGTCAAGGGCTCTCATTGTTTCCTTGGGGTGATAAGGACAATGTTTACTG  
 GGGGAATGGGGGCACTGGGTGTGTCTGCGCTGGGCGCAGGCCAGAAAATT  
 TGGTGAAAGGTGAGGAATTTAAAAGCAATCTAGAAGAGCATCTGGGTGGAT  
 CAGTGGTTGAGTATCTGCCTTCGGCTCAGGGCATGATCCCGGGGTCCCTGG  
 AATCGAGTCCCACATCTGGCTTCCTGCAGGGAGCCTGCCTTCTCCCTCTGC  
 CTGTGTCTCTGCCTCTTTCTCTGTGTCTCTAATGAATAAATAAAATAAA  
 TAACATATTTTTTAAAAATATGTTTTAAAAATAAAAAATTTTTAAAAATAA  
 AAAATTTTTTAAAAGCAATCTAGAGGGACATCTGAGTGGCTCAGTGGTG  
 ACTGTCTAGCCTTTGGCTCAAGTCGTGATCCCAGGGTCTGGGATCAAGTC  
 CCACTTTGGGATCCTGTAGGGAGCCTGCTTCTCCCTCTGCCTATGTCTCT  
 GTGTCTCTCATGACTAAATAAATAAAATCTTAAAAAAGCTATCTA  
 GAAAGCAATAAACAGTTGATTCACTTTTTATTGGCCTCTTGCACTGACAA  
 TTTTGCACAATTCAGTGAACCACTCTTCCCCATCTGAGAAGACCACT  
 CCACCATCAACCTCCACCACTATTGGTGAGTTACTGAGCTTGGGGCAT  
 AGAAGATTGGTTGGGAGGGGGGTGGATATTGTGGTTCTACAGAAAACAG  
 GGCTCTATGGGAGGAGGCCACCATAATTTCCCACTACATGGGCTTGATTTT  
 TATTTTTTCCATTGAAAGCAAACAGATTTTACCTGTTTACCTTAATACGGG  
 TATAAACATTAGGATTGTCCAAGGAATAACAAATAAGAAATGCTCGTGAA  
 GTGGCGAGATAAGATGGAAGATTAAAAAGTGGGTCTCAAGAGGGTATCC  
 TGATTCTGTACTGCCCCCTTAGCCTCCACATTTAATCCATTGGTATCAGAA  
 CATTCCAGAGCTACTAAAACAAGGCCTGTGGTCTAGGCCTAGGGCAAGCC  
 ATCATCATTTCTGGTTTATTCTTTTGGAGGGAGAGAGAATGAGCAAGGAGG  
 AGGGAGAGGATTATAAGCAGTCTCCATGCTCAGCTCAGAGCCTGGCGTGG  
 GGCTCGGTGTGGTGCTCGATCTCATGACCCTGAGCCCAGGTCAAAAGTCC

GATACTTAACCCACAGAGCCACCCAGGCACCCCGCATTTCTGGTTTAAAT  
CAGAAGTTTGGCAATGACGGCCTTGGAGCTAAATCCAGCCCAGGGCTCTT  
AATAAGTATTGCGGGAACACAACCACACCCATTAATTTACCCATATCATC  
TACAACAGAATTATTGCAACAGCAGAATTTAGTAGTTGTGACAGAAACCG  
TGTGGCCTGCAAAGTCTAAAATATTTATTATCTAGCATTAGTCTGGCTGC  
TATAACAATGTCATAGACTGTTGGGGGACAGGGGTGGCCTGAACAAACAT  
GTATTTCTCACAGTTCTGGAGGTTGGAAAGTCCAAGATCAGGGTCTCAGC  
ATGGGTAGGGTCTTGGTGAAGGTTCTCTTCATCTCTTGATGAAGGTTCTC  
ATCTCTGACAGATGGCCGTCTCTCTGTTAGATTCTTAAGTGACAGAGACA  
GAGCTCGCTCTCACACCTCTTCTTCCAAGGGCACTAATCCCTTCACGGAG  
GCTCAACCCTCATGACCTAATTACCTCCCAGGGCCCCATCTCCAAATATC  
ATCACATTGGGGTTTCGAGGTTAGAGTTTCAATGTATGAATTTGGGGTGG  
GGGTGGACACAGATATTCAGTCCATAGTATAGCCCTTTACAGATTACATA  
TGCTGACACCTTCTTGAGAATACTGGAGTAAGCTCCTTGCTGAGCCCATG  
GCTTCTTGCTTGTCTTTTGACAACCTTTTCTTTACCAGGGAGCCAGCAT  
TACCTACAAAACACAAAGCACATCATGATCCTCTCCTGCTAGAACTACC  
ATTCTTTTCCAATAACAAGTAGAATAGAATGCAAACCTTCAGTCTTAGGCT  
GACAGGATCCTTCTTAATCTGGTAGCAATACCTCTCAGCTGCCATGACTG  
CTTCTGAACGTGCCCCCTCAGACATGATGTGCTCCTGACCCCCCTCACAAATC  
TTCATGCTTGCTCCTTCTCTGCTGGAAGGCTCTCATTTCACATCCTGC  
TAGGGCTTGCTGCCTTCTTCTATTTTCAGGAAGATCTTTGCTTTATTTTCTT  
TTTAAAGATTTTATTGATTTATTCATGAAAGGCACAGAGAGAGAGTGGCA  
GAGACACAGGCAGAGGGGAGAAGCGGGCTCCCTGGGGGAGAGCCTGATATG  
AGACTCGATCCAGGACTCTGAGATCATGACCTGAGCCAAAAGGCAGACAC  
TCAACCACTGAGCCACCCAGGTGCTCTGAAGATCTTTGCTTTAATGTCAC  
TGTCTCATAGTCTATCATCTCTTCCCTTCTGGTACATTCTATCCCCATAC  
CCTGCTTTATTTTCTTTGTGGCATCAATGAGTTCCTTCCATTAACATAC  
ACTGAAGAAGACCCATTGATGGATTTGCCTGTGAGATAGGAGGAAAAGAA  
AGGGTTCAGGATGACTCTTATAATTGGGACATAAACAGCTACAGAATGA  
TGATACCATTTACTGAATCAAGGACATCTGTGGGAGGAGCATACTTGGGA  
GGAGAGAGGAGAAAAGAATCAATATTTCTATTTTGGACATGTTATATTTA  
ACATATCTATTAGATGTGAGGGTGGAGATGTCTGGTAGGCAATTGGATAC  
ACAAGTCTGGAATTCAGGGGAGAGATTGGTCTGAAGATAAAAATTCATGA  
GTCATCAACATACAGATGACATTTAAAGCTATGATCTCAGATAGGAAGTG  
CCAGGTAGTGTAGACGCAGAATGGAAGAGGGCCAGAGCTAAGCCCTGGAG  
CAAACAAACATTTAGAGCCCAGGAAAAAAAAAAAAAAAAAGAAGAAGGGCAA  
GGAAAGGAGATGGAAAAAGAGAATCCATTGAGGTAGCAGGAAAACCAAGA  
GAGTATGATATCCAAAAAGCCAAGTGAGGAAAAATTGCCATTCCAAATGC  
TCCTATAATCTCCAGATGAAGACTCAGAATTCATCTTTAAATCTGGCCAA  
GGGCTGAGAAAAGAGCAGAAAAAATGGGAACAAAGCCTTGCGGGAAGGGA  
TTGAGAAGAGCGAATGACGTGAAAGTGAAGATGCAGAGGCTGAGTACAGG  
TAACAATTTCAAGTAGTTTTGAGAGGTGACAACAAGAAAAACAAAGTGAGG  
GCTAGAGGAAGCTATGAAGAGAGGGAGGGGTATCTAAACGGGCGAGAGT  
CCAGTGCAATTCACCAGCTGGTTAGAATGAGACACTGGAGGGAAAAGATTA  
TGCTGAGGGCAGGAGAGATCATTCGACAGCAGTTTTTAGTTACAGGCAGG  
ATCTGGTGTGGTTCAAGAAGGGATCTGGTGCATTACAGGGAAGGATCTGGT  
GTAAGTAAGGATGGAAGCTGGTGCAATTCAGGGCAGGATCCAGTGCAATT  
CAGGGCGGGAACCTGAGTAAAGTAAGGATGGAAGCCGGTGCAATTCAGGGC  
AGGGTCTGGTGCAATTCAGGGCAGGATCTAGTGCAATTCAGGGCAGGATC  
TGGGGCAATTCAGGGCAGGATCTGGGGCAATTCAGGGCAGGATCTGGGGC  
AATTCAGGGCAGGATCTGGTGCACTAGCAACAAAGTCTCAAATGAGATCA  
GGCATGGTCTGCAGGGAAAGCAGAATGTATGCAGACTGGAGGAGGTGGTA  
GGTGACTCATTTGCAGGTGGATGAAGAAGTTCTCTTCTGCCTGCTTCTGT  
TTTCTCAGTGAATAAAAGATGAGGTCATCAACCGAGAGTGAGGGGGTGGA  
CGTAAGGAGAGAGGAGATGTGAAATAGTACTCTGGAGAATGGGATTGCG  
AATTGACCAGGGGAATGTACCAGAATGGCCAGACAGTGCTGAGGGCCCAG  
CTGAAGTTTGCGGTCAAAAACGAACAGGTGACCAGAAAGCCCTGCTTTGT  
GTTTTCTCCAGCCATGTTCAAATACTCTGGTGCAGGTTCTGAGTTGAAG

CAGGAGAGCTTTTCAGGTCAGCAGGCCAGAGGGAGAGATGGAAACTGAAAG  
TTTATGCAAGGTGTTGACTATAACAATAGAAACGATAAAATGAAGGCCAT  
GAAAGGCTTGAAGAGATGGTGCCCAATGGACCAGTTGGTGGGTGAAAGTT  
CTCCGTAGAGCCAAAGAATTGTTGAGGTCAACGTAGTAGAAGGAATTACC  
TGGAAGATAGCAAGTGGTGGTTGGGAGTGAGATTCTTAAAAATGAGATTT  
GGAAAGAGGAGCATCTACAGAAGAAGAGCTGTGTGTGAGCATGGGAAGGA  
GCAACTGAATGCAGAAGACATGACCATTGGAAAAGAATAGACCAAAAATC  
TGAGAATCCTGAGCAGTGAAAGGCCCGACTACGTGATCATTGAGACAAC  
CAAGACTGTGACAGCTGCAGCTAGTGTTGCTGGTGAGAGGTAGCCAGCGG  
AAAGTCTTCCATAGATGAGGGGAAACCCAAGAGGTGTCAGTGGTTGACTT  
ATCCAAGGAGGAGGTGGTTAACAGCACATAGTCCAACCTATGGGTATCA  
AAGGATCTGGGGTTGTAGAGGATAAACGATGGAGGATGGAATGTGGGGCA  
AGGAAGACATAACACCCTTCCAGGCCCTGTGTCCATGGGGAGGAAGGAAG  
AGCCACTGGCAGAGAAGGTTGAAGGGGAAGCCTTGACCTGGAGAGGTGAC  
TGGTTTCGGGCACAGCAGACATTCAAGGAGAACATTCATAGAAAAGGGTA  
AGGATATGGAGCATTTTGATATGGAAAGACTCTGAGCTTCCAACCACAGG  
GGAATGATTTTGAGGGACTGCTTCTGTGTCCAAATTTCTCCTTTCTATAA  
GGAATCAGTTGAACTGGATTAGTTTCCACCCGAATGACTTTATTTTAAC  
TTGACTGAATCTGAAAAAGAAATTCCAAATAAGGTCACATTTTGAGGTTT  
TGTGTGTTAGGACCCCTCCATATCATTTTTTGTGGGGTCACAGTCCAACC  
CAAATAAGGGCTGAAGGTCCAAGTGAGAGTACATGTCCCCGTGGGCTTGG  
ACTTTTGATGGTAAACTGCAACCTAATGTACGAGTGAGCAACAAGTCTTT  
GTCTTGGGGTTTTTTTCCCTAAGAGAGTTTGTAGGACAAGATGGGTGGTATT  
ACAGCAGGGGAGTGGTGGTCTCACCATGCACAGCTTAATTCAGAACTAT  
ACAAAGGTCCGTGGACCTTCTTTAGAGACAAGTGTGAGTAGGATGGCAGT  
AGGCAGTGGCTCTCATGCCGCCCTTCCCCTCATTCACTCTACACACTACA  
CCTCAGCTATACCTGGTCTATCTCTGCCTCAACAAAAACAGAAACAAAAT  
TAAAAAAACTTAGATTGTTCCAGCCTTGGGGCTTTTGACTTGCCACCCC  
ATTGCCTAGAAAACGATTCTCTCAGAGCTTCTCATGACTAGCTCCAGCTC  
ATCACAGAGAGTTTATCTCAGAGGTCACCTGCTTAGAGAAGCCTTCCTCG  
CCCCTCGTAACCTAACAAACCATCCCCTCTGTACCATTTTCATCATTAT  
TTTCTGAAAAGTTACCATTTTACATTTGTTCACTTGATATAATCTTTGTT  
CCTCCAACCAGTCTGTAAAGTCCACCAAAAAAAAAAAAAAAAAAAAAAGGA  
TACGGTCTCCCTTTGGTTCCCCAATGACTCCCCAGTGTGCAGAACAAGGC  
TTAGTGTGTGTAGGTGCTGAATAATAACAACAGCAAGAACAATAAGGCA  
ATGGTAATAATAATCGCTGATGAATAAATGTAGGCGTATACAAAGCATT  
AGTCATTTGACCTCCCTCAACCTCATTCATAAATTAAAGACCTTGACCTA  
GGTATTATCTTTAAGAGCCTTTCCAATCTTATAATGCCAGTTACATAACA  
GCCTGATATAATCTGAGGGACCCACAGGAATGTTAACGCTCGACATACAT  
GCTAATATCCCAAAGCCAGGAGAAGAAAGGTCCCATGTATTATGCCCGAA  
AAAAAAGTCTCTTTGTGAGGTCAAGATAACTGATCTAATTTGAGCAAAGA  
AGGATATTACACCTTTCTTCCACTTCCCATTAAATCCTTTAAGCTGCAGT  
TCGACTCCGTGCTTAAAGGTAAGGGCAAGGGACAAGATGGTCCCACAAG  
GGCAGCTGTGCTGACGCGGCCACCATCTTGGGCCTTTGGGTGAGTTCCAT  
CTAGTTTTGGGTTTTCTTCTCATGTGCTTAGAGCATAGAGGGGGCTTCCC  
AACTGTAGACAGAGTCTCATTCCCCCAAGAACCACAGAGACCCTTATC  
ATTGATCTTTCATTCAATATTTTGGTTGAGGAGGGGAAATAACTGATCTT  
CCCCATTTCTTCTTCTGACGCCATGTAGTGAGTTAGGGCCGACGCTGGC  
CCGGTCTTGACCTAAAGAGGTGAAGTCAACTCCTTTGTCCAACCTTCAAAT  
GTCTAATCTCTCTCTCTTCTAACCTCAGTTGCACTGAAGATCATCTGATG  
TCACACACACACCACCACCACCACCATCACAGCCCCCACCCTATGGA  
CTTATTCTTTGGCCAAAGGAGTAACAGCCCAAAAGATAGTTTGAGGTAGC  
GGAGGTCACAGTTTCTTGGCAGAAGTTGGCGACTGCGGTCCTGTGCTTCC  
TCTTTGACACTTTCCAATCTGTCTTCCATCTCACCAGGTCACCGAGGTGT  
CTTTCTCTCCCATGGGGTTGGGGGTGGGTGGTGGTGGCACAACCTC  
CCCTGGCCTCTTTCTTTCTTCTGATTCCAAAGCACGTGTCCGGAGGTCC  
CTGCTCGGCAGCCTGCTGGGCCTTTGGGGCTGCAGGCCCTTTACGAGGCC  
GGGGTGGCAGCCGGCGGCCCTGTGGCTCTGCGGGCTGGTGGAAGCCGCAG

CAGGCCCAGGGAAAAGGCAGGAAGAGCTTGGGAGGAGGCGAAGCCTGCCT  
TTTTTGATGACTGGTCTAAGGCTTCTTACTTGAACTTTGGTTTTATAGT  
TCTATAAAAGGCAGCTGACAAGAGATCCCGTTTTGGGAGGGTCCAGCTGG  
CGGGGCCAGCTGGGCGGGGCAGCCCCGACGTGTGCAAGCCAGGCCTGGT  
GTTACAGCCATGATGTCAGAGAGGCCTGGGGTTCCCGGCGAGCCAGAGGGT  
GGGAGGACAGACAGCCCGGCCCTCCCTGCCCGGTGCCAGCAGCGCCTTCA  
AATGCTGCCTTCCTGGCTCGCCTGCAAGAGCCCTTCCTCCTCGGAGACGC  
TTTGCAATGCTTGGAAGGGAAGCTCCTTCGCTGGTCCTGCGGGTGTCTGC  
GGGCCAGGGGAGCCAGGCCTCCTCCCCGGGCTTCCCGGCTCTCCCCCCCC  
ATCACCCCCCAGTCCCCAACACCCCTGCCGCTGCCTGGCCCGGCTCTCCG  
CCTCCTTTTCACTTCAGGGCTGGAGGCAGGAAGCCCCGAGTGGCCTGGCTGC  
TTCAGGTCCCACATCCTTCTACAGACGTGTGGTCCTGAGGCCTTGGGCTC  
CTGGCCTCCCTTTTCTGGCTTTGGGGGGCCGGCCTCTGCTCCCTGCTTAGA  
CGCAGAGGCTGACTCCAGATCATCATGCTGCCCAAAGGGGGAAGAGTGAG  
GGTGGGTGGGTAGTTGTTTTCAATTAAATTCAATATGAAGAACACGTTTT  
TTTTTTTTGTTTTTGTTTTTTTTTTTTTTTTTTGCTTATTCACATCCAACACC  
CCATAGCGTTGGCCCAACACTGCAGTTTCCTGTGGACAAAGCAGGTCCGGC  
TCTCCAAGCCCTCAGGGGCTGGGGGGGGTGGGGTGGGGATGGCTCCCTC  
AGCCCTGACTCAGAGGAGGTTCCCTTGCTCCCCTGCCAGGAGTAGCCGCTG  
CCCGGCTCCAGGGAGAGGCCAGGAGGAGGGAAGAGGGAAGGACAGTTGGA  
GACGGGGCACAGAGTGCTTGTTTTAGATTCTCGAAAGGTTGCAGGAGGGA  
AGGGCTCTGGCAGCCAGCAGGTCCCATGATGGGTCTAATCTGCTTGCTCA  
GCTCCTTTCTGTGGAGACAGATCAGAGTCGCCCTGGGAGCCCAGGAGCCA  
GGCCTGGGGGGGCAGAGTTACAGCAAAAAACCCAAGTAACATTGCTGAG  
TGGCCTGAAGTACTAGAATGATCCATCGCAGTCAGTAATTAGCATGCCAG  
GCAATTCACATGTGTTCTGTGTTTTCTTGGCTCTTTGTGGTGGCCCGAG  
ACCTGTCATTCTGAACTCATTCATTCTGTGCAACTGTCAGATGTTCTTTT  
CAGGACTTTCTGCGTGCTTCAGAAGGCTTCAGCAAGGATGCTGTGGGATT  
GCTTGGTGCTTCATTGATTAACCAATGCCCTGGAAACCAGGGCTCTTTTA  
ACTGCCCCCTGGGGGCAGTGGGTTTAGGGGTGCGGTGTTTTCTCTGTTTT  
ACCTGAGACTGGGCATGAGGGTGACCCTCTGCCCCCTCATGGCCTGTGTTT  
GCAGGTACATGTAGTGTCTCAAGACTGTCCCCTTCTTTTCAGATGGGAAC  
AAGGCCCCAGATAGAAGGTAAGTTTAGAGAAATCTCCCAAAGAGAGTGGA  
AACGGAGCTTCCACTACCCAAAGTTATCGAGGAGAGACCCCACCACTGGC  
CACACACCCTTATTCTCCTTCTCCCCTTTTGCACTCTCTTTTGCTCATTT  
CGTTTTTTCTGTGAATATCCATCGAGTGCCCACTGTGATCCAATTGATGC  
CCTCCCTCTTATGAGACATTGCTGCATATTAGATATGCAAGTCAAATCAA  
ATTTGGAAGGCAAATAATAATAGTAAATTAATTAAGTTAAATATCTTTA  
AGAAGACAGCAATCCAGATCTGTGGTAAAGGAGTAAGTGGGGGATGAATG  
AGGGGTGGGTGTTGTGTAGTGGGTGGCAGCAGGTCTGGACCTCTCTTCCA  
TGTCGGTGAGGTACACAAACTGCTCAATTAAGCAACAATATCCTTTTCA  
AAGTACTTTTTCTTTATACCCCTTCCTGGAGGGTAGTAGGACCAGGGGAA  
TTGTGCCCATTAACAAGATGAGCAAACCATGGCCTGCAGTTAAGTAACTT  
GACTTCTTAGGGGCAGAAAAAGAGCCTGATCCCAGGATTTAGAGATATAG  
ATAGCTACAACAAGGAATGTTTACTTTTCTTCTTTTTTTTCCTAATGAAT  
ACCTTGGATCGTTTTCTTTGTATCACTCTACTGCATTACCATAGACCGAGT  
GGCTCCTCAGAGTTCTGAAGGCTGGTAAGTCTAAGATCATGGTGGCCGCA  
GACACGGTGTCTGGTGAGAGCCTGCCTCCTTGTTGATGGATGCTTGGCTT  
ATCGTATCCTCACTTGGTGGAGAAGGGGAGAGGAGGCAAGCTCTCTCCTG  
GCTTTTCTTATGAGGGCATAACCTAACAAACCTCTCCAAAGCCCTATCTC  
TTAATGCCATCATATTAGAGATTAGGATTTCAACACATAGATTGGGGGGC  
GGGAGGGGTCATATGGATGTTTAATCCCTAACAGGGAGAGATAAAACCTA  
CAAGAGTATTCTAGTTGATGTCACCTGGATATAAAGTCAGAGAGAAGGTA  
GCCTGAGAAGGAAGAAGCTTGTTGTCGCTGATTTTTGAAGATGGAGAAAGG  
CCGTTGAGCTAAGGAATCAAGATTACGAAGCAAGGAAATGGGCTCTATCC  
CCCCACCCCTGATCCTCCAGAAAGAACCTGGGCTTGCTGACACCTTGAC  
TGTAGCTCAATGAGACCCACTTCACACTTCTGATCTCTGGAAGTGAAGC  
TAATATATTCTGTGTTAAGCCATTAAATTTGTGATAATCTGTTACAGCAGT

CATACAAAACCAGTACAAGTAGATGAACTTCAGTCTGGATCCTGGTTAAG  
TCCCCATTGGTGGCATCCCGAGCACATCCGTAGGTCGTGGCATTGTGCAC  
ATGAATCACCAAACAATGACCTAGGAGGGCTTCTCGGATTTGTCTGCCTC  
GCTAATTCCCCCAGGCCACACAGAGCATGTCCCTTTGCCATGGTCACACC  
AACATTGGTGACTCTGGACCCTCTCCACTTCCCTCTCTTTTTTAAACCTTG  
GCTCCCCCTCTGAGGCTGGTGCCAGGTTACAGGGCCCAGCTGTGGAGCACA  
CAGACAGGGTAACAGCTGTGCAGCACGAGTGACTTCATTCATGGCTCCCA  
TTTATTGGCAAAATGCAGCTCCAACAAGTCACCACTAGTAAAAGAAACCA  
CAAAGCCCAGGGCTCCCCAAGGAGGTCAGGACCACAAACATCAAACAGGA  
AAGTTTGGTCGGGCCTGCATACACTCATGCTGAGACTTTTCCACCTGCCT  
GTGGGCAGAGGTCATTCTGGTGTGATGCTACCCTGAGCAGTTGAGTAGAG  
GCTACAGGTGATCATAGCCCCATCTGTGAAATTACAGATGAAAAGGCCCA  
GTGGAGGTGGGCATGGGGATGCAAAAGACTCTGGGGCTGGAAGGCTTTGGA  
AGCCGTGCATGAGTCAGAGCCACAGAAAGGCCCTGGTGCTTGGCTATAGA  
CAGAGGATGCCTCCTTCCCTTACTTTTTTCTGTAAAGAAAACATCCAATT  
CCATAAGATAATTGTAGTGATGAGTATCTAACAGTGGGGGTTGTCTTGT  
TCTCAGCATAAGATAAGCCCTGATCTGCTTCCCATGTCTCTATTGGACTC  
CCTGGGCTCCCTCGTTCTCCTTTGAAAAGGGGAATAATAATAAGTGAG  
CTCGTGCTAAGCTTTGGAAGATTAAGTGGTCAATGATTGAAAAATGACTA  
GCACATAACAGACAATCAATAAATATTAATTTCTTGTCTCACCCCTTCG  
TGATTCCTTCAGATTAAGCTGTATTAGTCATACTGGTGCTCATCACCCAA  
CTCGGGTCTAGGCTTTTGCCCTTCAAAAATGACTATAATTAAATAATTCCC  
CAAATGACAGAAATGACTATGTTCTTTAAAAATCTATGATGGGAGATTTT  
AAAAATCACAGTGTCTCTTGGCCCGTATTGCCTTCTGACCTCCTCTGGCCC  
ACTGGCTTTGTTTCTGTCCCCGACAGCGGTGACACACACTGTGGCCTCTC  
TTCTGCTTACATAATGCAGCTCTTTGCAATTTCTTTAGACTGTTCCCTCC  
ATCTCACACGGATGGTATTTGGGAAGCTCTATATTGAAGATTTTTTTAAT  
TCTGTTTCTGTGTTTTTGTATTGTTTTTGGTTTTTGAAGTGCTATTAGTG  
TTCAGGCATTCAAACCCTCACATCCAACCTTCATGCTGTAAAAAGATCAGT  
CCCAGAACGCATTTCCTTCCCTCCACCCTTGTGTGTGCGAAGGATGCCATG  
ATGGTTTAAATCAGGGAACATGCCCCAAGGCTTTCACCTCTAGGCTTCTC  
GTGACCCGACTGAGATGATGGAATTCCATTCTCATCTGATAACTGGTTTC  
TTGGCTTAGGTGAAACCAATTTCTAGACAGCAGAAAGCCAAATCCCTGAG  
CCAGGCTGAGTAGGCATTTCTTCCCATCATGTCCACTGTCCAGTAAACC  
CTCTTACTGGGATAGAAGTGATTCTTATTGGTGCTACATCCCCAGAACA  
GGAACGGAAGCCTCCACGGTTTCTTTTAGCCCAACAGATGATGTATTCTC  
CAAACCTCTTCAAGATCCACCAGAGGTAAGGAAGCATCCGAGGATTGGGAG  
TACTTCCCAAAGGCTCTGGAACGGCATGGGTCTTTCAGGGAAGATCTGC  
TGTGATCTTGGTTCATGGTCTGTCTCTACCCAACCTTCTGTGTGGCTTTC  
TCCGTTTCTCCTCTGAAAAATGGCAAGGGCAGGATCCAAAGATCTCTTTG  
GTCTATCCAAGCTCTTAGGACTGTCTATTCTCCATTCTCCCATTTTCA  
GTGTTACAGTGATGCCTATTTATCCCAACCCACGAATAGCATTGCAGGGG  
TAACAAGAGAAATAGTATGGGTGTAGTACTAAGCATGTTTTCTTTTTTCA  
GGCTAGCTGTTACCTTCTTTTTTTTTTTTTTTTAAATTTATTTATGATAG  
TCACAGAGAGAGAGAGAGAGAGAGAGAGAGAGAGAGAGACAGGCAG  
AGGGAGAAGCAGGCTCCATGCACCGGGAGCCCGATGTGGGATTTCGATCCC  
GGGTCCCCAGGATCGCGCCCTGGGCCAAAGGCAGGCGCCAAACCGCTGCG  
CCACCCAGGGATCCCTTACCCTTCTAAGTGAAAGCACTGCATGAGGCAAG  
TTGAAGTCATCAGAAATCATCTCTATTAGTCAGTCAGTGAATATTTATTG  
AATGCTACATTGGGCTAGGTCTTCGGGGACAGGACAAAAGACAGAACCTC  
ACCTCAAGGAGTTCATATACCACAGGATCTGACAGGAAATAAACATGA  
AAGTAATAATAATAATATAAGGAGTGCTCTGGGGAAGAAAAAGTTGGGTG  
ATTGGAGAACTACTTGACTAGGATAGGAGGACCAGGGTAAGTTGCCCCAA  
GGAGGTGCCATGTAAAGATTAGAGGGAATGAAATAGCTTTTCTAAGCATT  
CTAAGCAGAAGGAACAAAAATGCATAGGCCTGGGTGTTTGAAAGGCCAGA  
AGTCCAGAAGGATTAGCAAGATCCAGATCACTAAAGCCTTGTTAGACCAGG  
GTAAGGAGATAAGTTTTTAATTTGAGGAATTTTATGGTCAGATTTTCAGTGA  
TGCAAACTGAGCTATTAAAAATCCAAAAGAGTCCAGGCAATCCTAGAGGT

AAAGTTAAATAATTTACAATCTCATTTCTGTGGTAATCCATGAGGGGGAG  
CGTGGGTGGCTGTTTCAGGAGGCCAGAGCCCCATTCCCAGTTAATTTGGCA  
AGTCAACCTGGGAGGGCTGAGATCCGAGAAAGGGTCCTAGTGATGGAAGG  
GGTGAGGGTGGTGAGGTGGAGGAGAGAACCAGCCAGGCTCAAGGTGTACT  
TGGGTGAAGGAGTGGAAGGAGATAGGCAAATTTGCCTGGCAAGAGTCTGG  
AGGAATGATAGCAATCTGGGGGAGGTTGGGGTCAGGGGAGCGGGTAGTCT  
GGAGATCCCTGGCTTCTGAAATAGAGAATGAGAAGTTTGTAAACATGAATT  
ATGATCAACACAGACCCCCACCCCATGGTTTCTACTTCTCATGTGCCCTT  
ACACATCAGAACTGGCTCCACATCAGAGACTGATTTCTATGCATGGGAG  
CCTAACCTTGCTTCTCCCACTCTTTCTGAGATGAAAGAGTCAGCGT  
ATGTTAGTTGTATTTCTTCACTCAGCCTACATGATCTTCGAGTGTTTCC  
CTGCCATTCTCATTTCTATTAGAAAAATGTTTTACGTTGTTGGTTGGCT  
CTGAAAAATAATATTTGGAATGATTTTTTAAAAACAGTAAGTAATGAAGT  
CGACCTTATTCTTGACAGCCAGAGACTATTCTTAATATTTGATGTATTTA  
TTTCCAGTCCTTTTATATGCATATACATGCATTATGGATTTTCTATCCAT  
CATTAGAATAATAATGCATATTTCAAATTTGTACTATGATTTTTTTTACTA  
TGGCTTTTTTTCTATATCATCCATGGGCCTTAAATTAATTTAATAGCTA  
ATAATATTCCTTTATAAGGACATATCAATATTTATTTAACTATTTCTCTA  
TTATTTTCATTTTTGGTTATTTTATTTTATTTTGTAAAGATTTATTTACT  
TATTTGAGAGAGAGAGAGAAAAGAGCATGATGGGAAAGGGGCAGAGGAAGT  
GGGAGACTGAGAATCTCAAGCAGACTCCATGCTGAGCACGGAGCCCTATG  
CAGCGCTTGATCCCAAACCTGAGGTCATGACCTCAGACAAAATCAAGAG  
TTGGACACCTAACCGACTGAGCCACCCAGGTCCTTCTATTTTTATTTTAT  
TTATTTTTTCGTTATTTTCATTTTTTTAAAGTTGTTGGGATTTAATACAGT  
TACCACTATGTGACATGTATTTTATGTCTTCACTGAAATATCCATAGATC  
ATTATATTGGACCATCACTGCTGCCCTACAATTGGGTACTATTTTTAAAT  
TCACATTTACCCACGATGAAATGGAAGCTTAGCAAGGTTTGGTGGCTCA  
CACAAGGCCATCACAGCTAGTAAGAGGTGGACCAGAGATAATATTACTTC  
GGAGAATATGCTCACCGTTATATGTGTGTATCTGCAAATGGTTGCTCAGA  
AATGAACTTCTCTATCAAAGGGCTTAATGCTGTTTTTCTGTTTTTTTGT  
TTTGTTTTGTGTTTTGTTTTGGTTTAAAGGTTCAACTATAAACCACCAAACCTG  
CTTTAGAGCAGCACCCCCAAGCAATAAATAGTCTATGAAGTTATCCATGC  
TGTGACCTCCTTCTTCCAAAGACTAATAGGATTGTGATTTATTTTGCTGG  
TTTTGATTGCTCACTTGTGAATCTGAACTCCCTTTGGTTCATGTGTTGAT  
ACCTTTGTATTTTTCTTCAATGAACTATTTATGTCTCTGCCTACTGTGG  
ACTGGGAGTTTTTTCAATAAATAATCTGGAAGGGTCCTTTGTATACGTAGG  
ATATTTCTCTTTTCTTTGGGATGTTTGTGTATGTTTCATTTTGTCTG  
AGTTTTCTGTTTGCCTTTTAAATGTGATGTTTTTTATTCAGAGCTGGTAT  
TAGCAAGATTTCTCTATAAAGGGCCAGACAGTAAATATTTTAGACTTTGT  
GGCCCATATGTTCTCTATCACAGCTACTCAACACTGCCCCGTTGCCGGAA  
AACAGGGATAGATAATACATAAATTAATGGGTGTGGCTGGACTTGGCCCA  
TGGGTTGTAGTTTGCAGACCTTGATGTAAAAAATTAATTAATTA  
ATCTTATGTTAGAAAATCCACCAATTGCTCCTCTTTGAGATTTTCTCCAC  
TGCTTTTATATTCAAGATACTTGATAGGCGCTTCCTGTCTATAGAGATTG  
CTGAAAACCAGCCCAAACCTCCGATTTGGTAGTTGGTAACAGTTCAACATC  
TTGCTTCTCTAGACAAGCCTTCTTTTACCCCTCCACACACACTTTTTTG  
GTTTTCTCCTTCTTTCTCTCTTTCTTTCTTTCTTTCTTTCTTTCTTTCTT  
TCTTTCTTTCTTTCTTTCTTTTACATTTTTTGTCTTCTCTCTCTCTCTT  
ATTGGAATATCAAGGAAATCTCTTTGTCTTCCACAGAATTATGTTTATT  
ACTCAGCCTCCTCTCCTGCCCTCCTCTACTTCATGAACTTTCTCCAAC  
AAATGAGTTCCATTTCATCAGTGGAATTGTGGTGAATAAAATTTTCCCAT  
CTCATATATGTAGACAAACTAAACCCAGCTCAAGATCAGAGATATATCC  
ATCGACATTTTATTTTGGCTTCTTTTTGTGCATTTAACTATTTAGTTCTT  
TTGGTCTCTATATTGTGGTGTATGCTTTGAGAAATGATGCCAATTTATT  
TCAAAATGGTTAACCACTTCTTCCAAAATAGACTTTGGTATATATAGAAG  
AGTGGGTTTATGATTAAATTTGGCATTCAAATTAGCAGAGAAAGAATCA  
TTAAATAATGTGAGGCATCTTCCCTTCATTCTCTGCCTATCAGTTCTAC  
CACTACCATGCTGTTTTGATTACAATCTATTATAATAGCTCTAAAAAATG

TCCTGGCTACTTGCACAATTTCTGCTTCCAGAAAAATGTTATATTCATTT  
TTTCAGGCTTTTCCTTTAGCATGTACCATTAAGATTTTTTATTAAAAGTATA  
CAATTATACACAGGAAGAACGTATATCTTTGGATCATCCAAGCTTCTGAA  
CAGGAATATCTATCAAAATCTTATTTTAGAATTTTAGTAATTTTTTTGG  
TATTTTATCATAATTGATCTCCAAAAAATTCTTAATTTATTTGGATTGAG  
GATTTTGCATTTACTAAGTAGAGAATTGATGCTCTGGGAGCACAGTTAT  
TATATACAATTTTTATAATCATTAATGATGCATCTCTTATTTCTCTCTAT  
AAAAAATATCCAGAATTTGTCAATTGAGTCATTGTTCTCTCTTTTATATAT  
TGGGTCATTTTCTTTTAGGTTTCTCACTCTCCTCATCTTTTCTTACTG  
CATTTTGCAGTTTCTTTTTTTTTTTTAAATTTTATTTATTTATGATAGT  
CACAGAGAGAGAGAGAGGCAGAGACACAGGCAGAGGGAGAAGCAGGCTCC  
ATGCACCGGGAGCCTGATGTGGGATTTCGATCCCGGGTCTCCAGGATCGCG  
CCCTGGGCCAAAGGCAGGCGCCAAACCGCTGCGCCACCCAGGGATCCCCA  
TTTTTGCAGTTTCTTAAGTTTAAATCTTAAGTTTGTGATTTTACTTGGTA  
CAAGTGTCAAGCCTATGATTTACTTATTTTTTTAGACAGACATTTCTCACA  
TTACAAGTTCTACTTATTTGCAGTTGTTTCTCTTCAATATCCTCTATATT  
CTCTGTCCGTTGACTTCTTTCTACTCCAAGAATGCAAAAATGACTTGGAT  
TTTATGAAACAATAAAGAAAAACCAGGAGAAGAGAACAGGTTAAAATGGAA  
AGATTTAGAAACAAAGAGCTGGCTTTGTTTTTAAATTTTACTACCTCCTAT  
CGAAGTAATTTTCAAAGATATGCTTCTCTTTTAGTTCTCAGGATACAGTT  
CTGTTTTCTTTCTGTTGACTATTTGTCTCCCGTAGGTATGATGTTAATTT  
TTTCTCTCACCCCTCTACTTGTCAAGGAAGAGAGTTCTGTCCAAAA  
GCAGTGTTTTCAAACAGCTTCTATGTTGGATTCTTCTTAGACTCTTTCGC  
TGTTTCATTTCTGGGCTGGCTAAAATTGTATCTGACCTGGAGGATAAGTTC  
AAAAAAGTAAATAAATCCATAAGCTTGTGAGTTGTAAAGGGAGAGGCTAA  
TGAACATATTCCTTGAAACCCATATCCAGAAACATGGTGGAGATTGCTGC  
CAAGATGTTACATCTGAGACTCCACATCTAAGACTACTGTGTCTGTCA  
GCTATGGATGGTGGCATTTCGTTAAATGCTTCCCTGAGATGTCAAAGATAC  
ACTCCAAAGAGCTTTGCAGCAGGAATGCAGAGCCACGGAAGCCTGCCAAA  
AGTGTAGGAGGCAGATACACTCTGCCCCACAAATCTCATTTCCAGGCACA  
AAAGGTGCAAGCAGCGACTCAACCTGTGACTCAGTGATTCCCAGCTGTGT  
GGGTGCTGATCACATGAATCCCAAAGGTGAACCAGGGGCCACAGGGCATT  
GGGTATTGGCCTGGAACAACACAGGAGTTTCGGCAGAGGCCAGAAGGACCA  
CGGAGCAGAGGTCAAACTGTGCCCTCTTTGGGATCCAATTACAGATATGG  
TAAGTTGGATGAGGGAGTATGAAGAAGAAAGCACCACATAGCCACTTTGG  
TCCTCTTATCCTGCATTAAGTGACTCTCCTGAAGGGAAGTCTCACATTGT  
GGTTAAAATCTCAAAATCTGCCTCTGACATAGTGATTCTATTAGTCAGC  
CACATTGGTCCATCTTTTCATCAAGGTATGGGGAGGAGTACCAGCTCAGT  
AGCTTGCCATTAGGTAGGGGCCATGTGACTAATGTTGGCCAATGGGTTTT  
AAGCAGAAGTGATGCGTGTCAATTTCCAGAACATAATTGCTATTGAGAAAC  
TCTCTAGCATTTCCCTTCACCGTCATGGCAACCAGGGGGCTATGTGTCCA  
GATTGTGAAGCTCCAAGATGGTGAGACTGCCCTCAGTCTACGTCTTTAAT  
AATGTGGACCTGTAGTGATGCGAAATAAACTTTTGTTCGTTTAAGCC  
ATGAGATTTGAGGACTATTAGTGGGCTTTGAGGATTATTGATTACCATG  
GCATAGCCTATTTTATTTTGACGGATACAGCGTCTTATTAACCTAGTGAT  
CATAAGCAACACTCTGAATGTCTCTGGGTCTTGATTTCCTCGTCTGTCAA  
ATAAAGAAAATTGCAGTACCTGCCTTATACAAGGGATTGAAAAAATATTG  
CTTGTAAGAGTGATAACCAATGTTTCAACCATATAAGTACCTTACAAATGT  
TAAATGTTACCTCTTAGCTGTATTTGATTCTCCAGAAGATAGAAAGTAAA  
AGGAATGTCCTTCTGTCAAATTATCTCAACTCACATCTGAAAAGAAAAAT  
CAGAGCAAGAGAGAGAGAATATGAATCCTTTGGAAACATATCTCATTTAC  
AGAGCAATTAATGGGATCCTCAACAAAACAACCAGCACTTTATTGCCCAA  
GTCACACATGCCAAGGTGTTCAAGGTCCCATGAGATCTGAACTACCTGAG  
CTATTTTTCAGACAAATATCTGAGGAGAATAAGGTTTCAACTCCCTAGGAA  
AACATTTCCACATGCCAGTCTCTCTCTTGTCAATTATGTCCAAGATGGT  
AGTGGTAGACCTCTGGGAAAGGAGGAATGATTTCTAGAGGCTCTTTTTAA  
TTTTCTCACAGCAGGGAGGGAAGCTGACTCAGGGTGTGGTGTGCCCGTCT  
GCCACACATGCTCCTTGGGGTGTACAGCATAACCAGAGGTGTGGTTAGGT

GAGTATCACTCCACCCATGAGGTATCTTCTTGGCCAAGCCTCTTCTGACC  
CAAACCCCTCATAACAAGACTATGCAGTGGCAGGAATGATAGGATATATT  
TAGTGTCCCTCCATTGTCTCCCCAGTAGACTGTTAGATATATCTGCCAAG  
GACAACTCTGCCTTCAATAAAAACCACCATGTTCTAAGCAATTCTTGAAGA  
TCTCTTACTCACCCTGGCCCCAAGCAGGGCCCCCTGGCCCCAAGCAGGTTGC  
TCAGGTTGCTGCTGCTGCTTCTTTTTCTTCTCCTCCTTCTTCTTCTTCTT  
AAGATTTTATTTATTTATTTGACAGAAACAGAGAGCACAAGCAGAGGGAG  
AGAAAGAAGCAGGACCCCCACTGTGCAGGGAGGCCAATGCGAGGCTCGAT  
CCCAGGACCCTGGGCTCTTGACCTGAGCCAAAGGCAGAAGCTTCACCAAC  
TGAGACACTCAGGCACCCCCAAGCAGACTTCTTGGATGAAGTCTGATAC  
TATCACATTCCAGATAGTTACGGAAGTTAGGGAAGGCCTCACACTGAGGC  
TGCAGGGTGCTTCTGAACATCACACCCAGGAGAACCAGCTTTTGAACAG  
GTACTCTTTAGGCTTGTCTCAAATACAATCACACAGTGGAGTCACCAGTG  
TCCCAGGACAATTATGCAGTCCCTTTGAAGCTAGTGATTATAGTCAGCTCA  
GAATCTAAGCCCCCTTCTCTGGTGGGGATAATAGAGCAAAGACCAGTTCTT  
TCCAAACTCATATCCAGCCTCCACAAAAAGACATGAACTTCACATCTCCA  
TCCAGGTGGTGTTATCAACATCCTTCCACGTAACAGTGTATTCTCATTGG  
ACATAATCCTGAAACTTTTTCTAGCAAGTGAACATCCAAGGAAGATTAC  
CTTAAGAATTGAAGAAGACAGAGCCTACCTGCAAAGCTGGGAGCAAAGCC  
ATACGTATAAGTCATACATATATATGACACTGATGGACACTTTGGACATT  
GGTGACAGGTGTGTGTGGGTGTGTGTGGGTGGTGTGTGTGGGTGTGTGTG  
TGTGCAAATCCTGTACTTAGAGATTTTTCAAATAACAGAGTCAAATGG  
AATGGGTGGACCCCAGGCAGAGTCTTTTCCAACCACACTTCAAAGGGAGA  
AACATATTTTTGGATTCTTTACAAAAGCAGGATAAATGGTACTATTGTCC  
TGATTCCGTAAATATTGGCATTTGGAGAATAACAAGAAGACGCTCTATTAT  
CATCCATCAGTGCTTTGATTTCAATAGGTGTGTGTCCCTCCACTTCTGTC  
TCCTTCATCAAGGTTAGAGAGGAAATGGTAACTTTTGCCAGCAGCGTGGA  
TCAAGTTAGAAAAAACCTCAACAGTTAAGAACAGGAAGCCCCCAGATGTG  
GTACCCTGCATCCTGCAAGCCTCATTTCCAATGGGACAGTAAGTTGAAGGA  
CCTAAGAAGGAAAACAGGAAGACTCATGGGACACTCATGGATTTCAGGAT  
GACCCTCAGTCTGTTAGTTTTCTTCCATCCCTGGAAGACAGTAGATTCA  
CATTATCTTAATTTGGGGCCATTTACAAGAACGTAGCTAACTTACTTTC  
TATGTTATGGACTCAGTACTCTCTGAGCTTCGTTGCAAAGTCCAGAAGCA  
TCCTAGGGAAGAAGAATGAGAAAGATCTACTTTGGTTTATTGACCAAATC  
CTCATTTTCTTACCTTACCCATAATGCCTTCAAGATGCTATGACATATAA  
AACTGTAAGTGTAGGCTCTAATTTCTCTTCTGGTTCTAAGATTCTCTAAC  
CCTGATTTTGAAATTAAGATCGTTTGACTCTATAGTTGACAACTAGTGA  
TTAGTCATTTGACATTTCTCATTGAGACCTCTCAATAGCTGTTCTCAAAA  
ATAAAGAGAAGCTTGACTTTTCTTCCGTACTGATTAATGTTTAAATTCC  
TGAAATGGATTTCTATCATTGAGAGAAGTTGCTAAAAAATCCCATGTAAC  
CAGCCTCCTTTGATTCAATATATACTTTCCACTGGCTGCTTCTGTTTTAC  
AGTGGTCAGTAAAGAGTTTGATGGTATGTCTTCTCCTGAACTTTTTTTTT  
GTTGACTTTACAGATGGAGCCCCCATGACATACAGTGTCTTGTAAAGTCGC  
AGCTAAGAGGAAGCATTCTATGAAAGCATTTCATGAAAGCATTTCAGC  
TAAAAGATAAGCTTTTAACTACAAGGAGCTATTTTATATAAGGTACAAAT  
TTTCAGAGAAAAGAGTATTCTTTGACTTATATAAGTTATCCTTCACCCAT  
ATTCAAATCCCCACATTACAAACCATGAACACTGATCACTTATTACGTGT  
AAAAATTTTTTTGCTTTGTACACTTTTCTGCACTTCTTAATATTTTCATC  
TATTTCTGTCTGTCTCCTATCTAAAAAGGCCATGATTGAAAGGAAACAT  
TTAAAAAATAATAATTTGAAAACACTGTAAAACAAGCTAAAGGCAAACCT  
CCTCACTCCCTAAGCCCCCTTAGATTTCATAAAGTTGCAGAGTTGTCCCA  
TCTGTCTTGCTCACCACCAATTTTAAAGGGATGATAAATCATTTATT  
TCTACACTGAAACTGCAACTGACAACCTGCTGAGAGTTTCTGCCAAAGGGT  
GTGTCATAGCCAAAGGCAGTTAGAGTCCCTATAGGAATCCAGTTCTCAGA  
CTTAGGGACCCTGAGATACCGCTGGAATTTGCCTACAGGCCAGAATCAAT  
AACAAACAGAATTTCCACTGTAAAGCTCAGGACTTCCTCCAGACTGCTCCC  
TCGCCCTGCCCTAAGAAGTGCTTCTTGAGAAAGATGTTACGGATGTCAAT  
GAAGGAATCCTAGAACTGTTCTATCAGCAATTGGCCAGAATCTGCACCCC

CAATAGCAATATGCTTACATTATCTCTCTCACTTCATATTTTAAGATTGG  
TGAATCCATGTTCTTAGTTCATAACACTGTTGGAAGTAGTTGCTCTTAAT  
ATTATATCCTGTATTAAAGGGGTACTTATTTTCTGCTACCCTATATTTTC  
TCTATACTTTTACTTGACATTTGGTCTTTAAGAAAGTACATGGCAACCAA  
AAATATCACTGTCACAGAATTCTAGGCAAGTTTTAAGACAGGAAAGCTTG  
ATTTAATTTGCTGTGTTACATCAATTTAATGGATGAGAAACATGTACCTT  
AGATGGAAGGAGTTGCAGAAAGAAATCAGTGAGAGGATTGACGGAGAAAC  
CAGATTGCCTTCCAGGTCTTCCAAGTTAGTGAAGACACAGAGTGGCTTT  
ATTGTTTAGTCTAGAGGAAATTCCCCTATATCTGCAAGAAAATGTAAAA  
AAGATGATAATGTCAAACAGAACTTTTTTTTTAATAATCTGCAATTTTTTT  
ATGATCTCAAAATCAAACTTGGGAGGATTTTGATAATTTGTACACAAAC  
ATACAAGGAGGGAGAGCCAGATGGCGATACAAACATGATCAGTACTCCAG  
AGATGTGAAACACTGAAGATAATTAAGGAAGTCTTCATAGAAGCTGAGC  
AACTTGATTCAAGTTTTAAAAGACCAGAGAATCAATCCCAAACCTCTCAGC  
GCACAAGAGTTATGAACCAATACTCTGTTGAGGTAATACAACAGGTGTAG  
GACCATAGCTGCTAGCACACACAAAATAGCTTTGCTGCCTACCCAAGTGA  
TGCTAGATTTGACAGGGTAAGAGAGTAGAGTAAATAATAGAGTAGAATA  
GAATGTAGAAATGTGAACGGCTACATTTTACACCTGATTATCATCCACA  
GCTTGGCCAGTCTGAAAATGCGTTCTCCAAGATTCCATTTTCAACCAGCT  
TCTCACCCCTTATTTTTTGCCAACTGGAGTGCCTGCAGAGGGTATATACT  
TCTTTTAAATGCATGGAGCCAGGCAGCCTGGGTGGCTCCTTGGTTTAGCG  
CTGCCTTCAGTAAGGACCTGATCCTGGAGACCTGGGATTGAGTCCCATGT  
CAGGCTCCCTGCATGGAGCCTGCTTCTCCTTCTGCCTGTGTCTCTTCTC  
TGTCTCTGTCTCTGTCTCTCATTAATAAATAAATAAAATCTTTAAAAGTA  
TGGAGCCCAGTTTTTTTTTTTTTATCAGATTGATTTTTGTTATTGGTGG  
TGGTGTTTGGTGTGAATAGTAGAAGTTCTTTATGCATTTTGGAAGTTAA  
CGCCTTATCAGATATATTATTTACAAATATCTTTTCTATTCAGTAGGTT  
GCTTTTTTTGTTTTGTTGGTTGTTTCCTTCACTATGCAAACTTTTTAT  
TTTGATGTAGTCTTAATCATGGGCTTTTACTTGCCTTAGGAGACATATCT  
AGAAAAATATTGCTACAGCCAATGTCAGAGTAACTCTTACCTATGTTTTT  
TTTCTAGGATTTTTATGGTTTCAGGTCTCATAGTTAGGTGTTTAATCCAT  
TTTGAGTTTATTTTGTGTATGGTGTAAAAAGTGGTCCAGCTTCATCCTT  
TTGCATGTGGCTGGACAAGGAAGATGTGGTGTATATATATATGTATAT  
ATATATATATGCGCATACTTGCACATACACACTGACACACATGATGGAAC  
ATTACACAACCTCTAAAAAAGGATGAGATCTTGTCAATTGTGACAACATGG  
ATGGACTTAGAGGACATCATGCTAAGTGAAAAAAGTCAGACTGAGAAAGA  
CAAATACCATATGATTTCACTCGTATGTGGAATCTAAAAACAATCTAAA  
TGAATAAAAAACAGAATGAGACCTATAAATACAAAGAACAAATAGACGGT  
TGCCAGAGGGTAGAGGACTGGGGGGATGAGCAGAATGGGTGAAGGGGAGT  
GGAAGATACAGGCTTCTAGGTATGGAATGAATAAGTCACAAGAATAAAAG  
GCATGGTATAGGGAATACAGCCAATGGTACTATGATAGCATTGTATGGTG  
ACAAATGATAGTGACTCTTATAGTGAGGACAGCATAACAGAAAGGAGTTG  
AATCACTACGTGGTAAACCTGAACTAATGTGACATTGTGTGTCAACTAG  
ACCTAAATTTGAAAAATAATAAATAAATAAACAACAACTAATAAATGG  
AGCAAACCAGGTGTAAAAGAGAGGTTCCCTGTGGATGCTTATGTTGTAAC  
AAAAATGGTACTCCCATCTCTCATTACCTTTTAAATGCTAAAAAATGCCTG  
TCTTCACACGATGCATATGGACAGGTAGTCCGAGACTCCTTCTGCAGACT  
CTTGCTAGGAAAATGTAGCCACACCCTCTTTTACAACCTGTCACCCATATG  
CTGTTGGCCATAACTCTCCAATATACTTCTCCAGTCACTCTATCTCTGCA  
GAGTTCAGGTCTATGTCTATCTGGTGAACATCTCCATTTAGGTGTCTAA  
CAAGTATCAACATCTCTAAACTCAAATGAGGATACTTTACAAGGGGAG  
TGAGTGCCCTGAGACACACATATTAAGGAAGAGACTGTAGTTTGAATGAC  
ATTCACATCCTTACCCTCTCCTATCATGCCCTAAAGGTCCATCATCTCCA  
CCCATTGTTCTTCTCCAGGCATACAGATCCTTCTGTTTAGTAATAAGTC  
CAGCTCATTCCAACCACAGGGCTATCACTTGCAGTTCACTCTTCTAGAT  
GCTTCTTTGATCTTTGGATATCTAAATTCTCACAAGCACATGTATCTCAG  
TTCAAATGTCAGATTCCCCCAAGAGGATTTTTTCTGACCTAAAGCATTCT  
TTCTTCCTTACTTTTTATTCTCTGTCACTCACTAGACCCTGTTCTGTGGTC

TTCAATATCTAAATTCCTTATTAATATTTAAATGATTAACCCACTCTCA  
CCCCACCGTGCAAGCAGGAACCTTTGTCTGCCTTAATTACTACTTCTCTG  
GAACAGCATTTGATACCGAGTAGCTATTCACTGAATATTTATTCACTAAG  
TGAATGGACAATGGAATGATATCATGAATCATCATCCCCCTACAGATCTGT  
TCTTCCCATTTGTCTCTCTTCCCTTAGCAAATAGTACTACCGTTATCCATTT  
ACTCAAATCCCAAACAAGGATTCTTCCTAGATACTTCCCTCCTTCTTAAT  
CCCATCATAAAATAACCCCTATCCCCCAAATTACCTTCAGAAATATTTCT  
TAAATGTACTCCTCCTCATTGTCTCTGGGTCATTGCATGAGTCAAAGGAT  
TTCTGTTTGTCTACCATAAAGATTTGCCCCTCTGATTCCAATCCTCCACC  
TAACTGCACCTTTCCAATTTACCACCTAGATCTTTCTAAAAGCTAATTTG  
GGTCATATCACTGTCTCAACAATCCTGCAACTGCTTCTCATTGTCTAAG  
GATAAATGTGAATGCCCTATTATGTCGTGTTGGGTTGTTTCATGAGCTAGG  
TCTTCTTTGCCAGTCCAGCCTCTTTCACCATCTCTTGGTGAATCACAGAG  
CACACAGTCTCTCTCAGCTACCTGACGGCTGTGCTTAGGTGCTCTACTAT  
GCCTGAAATATTTATTACACATGCATGGATATGTTGTGTGATAAACTGCT  
ACCAACTAGTAAATGCTTAGCTCAAGCTTTTTTCCAACCTTGTCTGGATGCA  
TTAGGTACATCACGTCCAATCTCACTTGCTTATAGGATTTTTTCACACTAT  
TACAATACTCTTTTTTGCATGTCTATTGTCTTCTCCGAGGCTATGAGGTCT  
TGAGGGTCTGTCTTCTTTGCTTTCATGTTCTTAGTACCTAGCATATGGCC  
TAGGACTTAGAAGGAGCTTTGAAATTTTTGTTCTTGTGTAATTAATAGGT  
AGAGAGATGTCAATAAACTATGGGAGATAAATTTTTGTGGTGAGTTTTAAT  
CAATTACAATCCTCTGGAATTTCTTGTTGACATATTGGCTTCTGACTAGA  
AGCCATTATTCAAATGTTGAAAAGATTACAACCTCCCATAAAGAGCATCTGT  
TTTAGGCCGAGCATATGTAGAGGGCTCCGGTAATCATTGCAGAATGTGAT  
AAAGGGGGGCCACACCCATGCTCTGTTGGCTCAGAGCCCTCCTCATTTTCAG  
CCATGTGAGATACCATTTGAATGGGATTAGTCTTTCTAGTTTCTCATACA  
ACATAGCCATTGACTTTTAACTTAAGCAATGAGAGGTGGCTTCTTCTTCA  
AGCTCGGGTGACAGAGCTGGTATTGGAGTTGCTCTTCCCCATAAACAAAA  
ATAAAATTGGTCAAAATATATAAGGTACCTATTTTCAGTCATTGGACAAT  
AAATGCCCCCTCAGCTGAGATTCTTGAGATAAGGGAAATTTATGAGATAAG  
CCCCATGTTACCTGGGCTCTCTGCTAGAGAGTGTTCCCAAGCATGGCAC  
AAGAAGGTAGGACCCAAAGAGCATGCCTGCCCTGCTGAGCTGAGAGAGCA  
AAGATTAGAGTTTAGGAATACTAATGCAAGGAGCACATGGTTGGTTCAGT  
GGCTGAGCATCTACCTTTGGCTCAGGCTGTGATCCTGGGGTCTGGGGCC  
GAGTCCCACATCAGGCTCCTTGAGAGAGCCTACTTCTCCCTCTGCCTATG  
TCTGTGCCTCTCTTTGTGTGTCTCTCATGAGTAAATAAAATAAATCTAAA  
AAGAAAAAAAATACTAATGCAAGTAGAAATTTCAGGACAGAGTACAGAG  
AAGGGTTAAAGTACATGGATCAATGGGGAGTAAGGAATGGTGCAAGAGGT  
CTGTGTAGGGTTCTCTGCAAGGCCCTTAGCCAATGGCTAGGTTGAAAATGT  
GCATGATGAGACTCCGTAAGTCCTCACAGAAAGAAGCTGCTTCAGGATTG  
AGAATGGAACCGAGACTCTAAGAGGTTACATAGTATTGGGAGATATTGAA  
TTACTCTTGCATCCAGAGTAGACTGATGCTATTAATATCCTAGGGATACA  
ACTGGATAACAGTGGGTACTGGGAATAAGGCCCATGATCTACAGTAGGGA  
CCAGCAAACATATGGCCTATAGACTGACCATAACATTTTGCAAATAAATTT  
TTATTGAAACATGGTCGTGCCTATTAACCTTCTGTATTTTTATGGCTGCTT  
TCATGCTACAGTGACATAGTTGAGTAGTTGAGACAATAGAGCTTATAAAC  
ATAAAATATTTGTTCATCAAGCCTTTTTTTTTTTTCTTTTAAGTAGGCTACA  
CACCCAGCATGGAACCCACCATGGGGCTTGAACCTCATAACCTTGAGATCA  
AAACCTGAGCTGAGATCAAGAGTTAGACACCTAGCTGACTGAGTCACCTA  
GATGCCCTTGACATCAAGCCTTTTAAGAAAACCTTGTCATCTATGTGCC  
ACAGTAAAGTCTACTTTTAGATTTGCCCTAACAAAGCCTAAAACCAAGTTC  
CAACAGGATCATGGAGAACCTCTAGTATGTTATTTGCTTGTGAGGGTAAA  
ACTTAACACCTTTTAAAAATAGATAATATAATCCAGACTCCTTACAATGTA  
TTAACTAAGATATTCATCAGGTAACCTAAGAAAAATGCTAACCATGCAAAG  
GGCAGGAAAATGTGACCATAATCAGGAAAAAACAAAACAAAACAAAACA  
AAAAAACAGACAATGAACATTGATCTCAAAGTGACTCAGATGTTATGAAT  
AATAGATAAGAATTTAAAAATAGATTTGCTCTATTTGCTCAAGAACTTAGA  
GAAAACTATAGTTTTAATGAATGAATGCATAGATGTAGACTGCCAATCAT

AAGAAAAAGAACAAATTGGGAATTCTAGAACTGCAACTTTAAAAACAAA  
AACATAAGACATGGAGAGGCATAACAGCTGATTGGGATTAGAGGAAGAAA  
GCATGAGTAATTTTGAATACAGATAAATAACAATCTACACTGAAGAATGC  
AGAGGGAAAAACAAACAGATTGAAATTGATGGAGCTCCAGCAGCTTGTGG  
GAAAAATACCAAGCAGTCTAACATATATATAAATGGTATCCCAGGAGGAAA  
GCATGGCATATGGGGAATAAATGAAAACAAACACAAACACACATATACCC  
AAAACCCCCCAAATGGGGCTCCCAGATGGCTCAGTAGTTTGAGCATTG  
CCTTTGGCTCAGGTCTCGATGCCAGGTCTGGGTTCAAGTTCTGCATCAG  
GCTTCCCAAGAGAACCTGCTTCTCCATCTGCCTGTGTCTCTGCCTCTCTC  
TGTGTGTCATGAATAAATAAATAAATTCTTTAAACACATACACACAGAAC  
AAAGACCCCATAAAACAAATGAAAAAAGTTGAAGAAAAATGAAATCATCAA  
ATAATTTCCAAATTTGGTGAAAAACATCAATCTATACATGCAAGATGCTT  
AACAACTCCAAGAAGGATAAAATACAAAGAAAATCAGATCCAGGCACAGC  
ATAGTCAAAGCTGCTAAAAACCAAAGATGAAGAGAAAAACCCAAAAGCAGC  
CAAAACAAAAATAATCCATTATATAGTGGTGACCAACAGTACAAATTTTGC  
TAACCTCTCATCAGAGCAATGGAGACCAGAAGACAATGGAATGACATCTT  
TAATGTGAAAGGGGAAAAAAGATCATTGCATAACTTTCTTTTTTCCAGTG  
AGAATATTTCTCAAAAATGAAGATGAAATAGGAATGTCAAGAGAACAACA  
TTTATAAGAAATACTATAGCATTTCTTGAGCCTATGGATGAAATAATACA  
AGATGGAACTTGAATCTATAGTAAAGAGAGAAATGCACTAAAAAGTACA  
TATTTGGATATATACTAAAAATGAGCTATTTTTTCTTTGATTCCATTAGAA  
GGCAAGTAACTGTTTACAACAAAAATAATATCCAATCTAGGGCTTATAAT  
ATAAGCACAAAGTAAACATGTGAGAAAGGACTGGGGATGCGGTAAGTAA  
ATTATTTTGTATAAGATCTTGTGATGGTTAATTTTATGTGTCAATGTGA  
CTGCACCATGGGGTGCCAGATTAAACATTATTTCTGGATGTGTCTATGA  
GGGTGTTTCTGGATAAGATTAGCGATTAAAGTCTGTGGACTCACTGTAGTC  
AATTGCCCTCTGCAGTGTGGGTGGGCATCATCCAATCCACTGAGGGCTTG  
AGTAGAACAAAAAGGCAGAGGAAGGAGAAATTTGCCCCCTCCTTTTCTT  
TCTAGCCTGCCTGTTTGAAGTAGGGCCATCAGTCTTCTCTCCCTTGGA  
GGTATTTATTCCATTTACTCCCCTGATTGTCTGGGCCTTTGGGCTCAGACT  
GGAATTACGTTACTTTTTGTCCAGTTTGCAAACAACAGATGGTGAGACTT  
CTTAGGCACCACATTTGCAAGAACCAATTTCTCAAAATAAATCTCCTTTC  
ATATATATACAACATTTTGGTTTCTCTGGAGAATCCTAATACAGTTCATA  
GTTAAGATGTATGGTAAATGAAATGGTACATTAATTAAGTGGACTACAAA  
AATAAAGGAAATAAAAGGGATAAGTAAATGTATTAGTTAACCTCCCCA  
CTCCCCAGAAAAGAAGGAAAAAGAACACAGAAACAATGTGTAGGACAAAT  
AGGAAACAAATAGAAAGGTGGCTGACTTCTGCAGGATCAAATCAGTAAGG  
AAGGAAAATGTGAAAGGTTTAAATACTCAGAGTACAGGATGTGCTGAATT  
GGATAGAAAAGCAACACCTAACCATCGCTATCTATAAGAACTGATGTAG  
GTTGCGTATATTTTAAATTAAAAAACAAGATGAGTAAATACTGC  
CAATAAATATATTTTACTCTGTCAAATATTTTAAACAATTAATTTTCTT  
GGCTGGTTTATGGCTTCTAAATAGAGAACTGAAGTGTGCTATATAGGTCT  
GTAGGTAGGAGGTAAGTAGGTAGATAGAAGATAGAGATAGATAGATAGAT  
AGATAGATAGATAGATAGATAGATAGATAATAGATAGATAAATAGATAGA  
TAACTTCCCCCAAAAAAATGTGAATGAGTATATTATTTGGGATCTTTCT  
CAGTCTTCAAAATCTAATAAATCTCTTGGGCAACCCCAAGTCCAACAT  
ATTATATTTGTTGTTTACATGTTTTATCTTCCCTTCTCAGATTAAAAGTT  
CACTGAGAGTTCCAACACTGAATAAATATTGATGGGGTACTTATTATGTC  
AGGCATTGAACATACAACCTGGGAACAAGTTTTGCCAGAAGCTTACAGACT  
AGTGGAAGGAATCAGTAAGTAATCAAGCAATTATAATAAGATTATTATAA  
ATATGATAGTTGATAAATAGATGAGAGGATAAATGAATGGACAGACTTCC  
CCAATTTAGAAGTTTCAAGTTTCTAGATTAGAGCCACCCAGAGCCTGAGCA  
ATCTTCAGACATCTCCGTGCAGTGGCAGCTAGCAGAGAACAAGTAAAAT  
ATCAGGCAGGAAGTGAACCCCTTAATGGGATTTGCTCCGAAAACCTGGC  
ATTTCATAAAGCAACAAAGTAAAGGCATTCTATTCTTCACTCCAATAGAG  
CACTAGCAGTATCTTCAAGAGCATCATATGAATGATAATGTCTTTGTTGT  
TCTCTAGCCTTAATTTAATTGTAAAGAAATGTGGTATTACGTTTTGTTCC  
ATGAGGAGGGAAATAGTCCATGCATTTTGCAGGCAATACAAACAAGTCA

AGATGAGGTCTAAACTTCTAATTATCTCCATTTCCCTCAATGCTAGTTCT  
TTTTTTGGAGGATTTGGCATTAAATCAAACCTTGAGACTTAATGTAGGTCT  
TATATAGTATTGCTACTGTTGTTCCCTCTTAGAGGTGGGTATCCAGCAAAA  
TCTTGAAAGAACTGTTTCATCATGCTGTGACTTTGGCGATGACCATAT  
TGCAAAAATTCAATGTCACTTCCTGTAACGGTACCCATCGTCCTAGTCTT  
ATGAGAGAGACAAGCAATCAAACCATCTGGAATGTGAAATCCACTCATCT  
AAGCCCACAGCCCTGAATATTGCAGGAAGGGTACTTGGCTGACTTTTTAG  
AAGTTGATTAGCCTTTGTCAACATTTTTTTTTAAAGGATTTGTTTATTTGA  
GAGAAAGAGAGAGAGAGAGAGAGAGAGAACTAAACCATGGGAAGGGACAGAA  
GGAGAGAGAGAGAGAGAATCTTCAAGCAGACTCCCTGCTGAGTGTGTAGC  
CCAATGCAGAGCTCCCAGGACCCAGGACCCTGGGATCATGACCTGAGCCA  
AAATCAAGAGTTGGCTGCTTAACTGACTGAACCACCCAGGGGCCCCAGCC  
TTTGTACCTTTTAGCAGAGCTGTTTATACCTCATCTCAATAAAGACATT  
CCAGAAGCCTCTTTTGTAGTATACTCTTTGGTATAGCAAACACTGTCATT  
TACTGATGGCATTTCCTCATATACCCACCCAGCCCTCCTCCTTCTATGCCA  
GCCTGCCTGGATTTTGTTCAACTGTTTCATTTCCTTCAACATGTGACTCAAG  
GCAGGTGAATACCGATTTCGTCCCTTCAATTATGTAATTCTTTCCTCCTTG  
AGAGTGATTGCCTTGAAAAAGGGACTTGTGGCCCACTTCTTACCGATGAG  
ATGTAAGAGAAGTCTGAAAAAGGCAAAGTTTCAAGGAAAAGTTTCCTTGT  
GACTGAGAAGATGCAGAAAAGTGGAGGCCTCTCTCTGCAGCATGGTGATGT  
TCTCTGTGTGACCCCCGAAACTGTGGTGGCCACCTTTGACATGCGCGCAG  
AGCTGGGTAGGAACAAACATAATATTAAATAATATGCTAACATGGACAAA  
GCAGTCAGAAGGAACCCAAGGCCTGGAAGACCACATCTGAACAAAAGGAC  
TAATCAAACCTTGCAATTTCCCTATCATGGGACATTTGTGGTATAGAACCTT  
ATAAACCTTTCTTATGAAGGCAATCATGTCACAATGTTCTTTTCCCTGAA  
GCCTAGGGGATTTCAGATACAATTCACCTTCTGTCCATTTCTGGATGAGC  
ACCGAATCAGGATTGTAGAGAGCCAAAGATGAAGAGGGATGCTGAAGAAT  
AAGATGTGGAGATGAGAAGGACTTAAGTTACCATATGAACTGAAATCCGG  
ATGTGACATCACCTTCAAAATGTTTTGTTTCATTTGGGGAAGATGCACCCA  
GTTAGCATCCCCCATTACAAATAGAAGCTACAGGCCACTAGGCAAGAAA  
AGGGCATAAATGTTTAAATAATAGAGCCATCTTATTTTCATGGCAAATCAGT  
GGGCCAAGAGCTGGTACAAACTTCCAGGAGGGTAACCAGACTCCTCTTTT  
ATCTCTTTCAGCTTCAAGAAGACAACTTCAAGTCAAACTTAGCCTGAT  
ATTTGAGAACTAATTACTTTGCTGTCCTTTATATATGACATATATATATG  
TCCTTTCATAAAAATGGCAATTTTAAATCAGAATCTTCCATTCCCAGTCA  
GTAAAGGCTACAGTGAGCAATAAAGTTAGTTGTGAACCAAGCAATAGGAC  
AAGACTGAGTAGGTAATTCTGTAATTTTAAAGAGTTTATTTATTTAT  
TCATTAGAGACACACAGAGAGAGAGGACAGAGACACAGGCAGAGGGAGAAGCA  
GGCTACCTGTGGGGAGCCCAATGTGGGACTTGATTCCAGGACCCCGGGAT  
CATGACTAGAGCCAAAGGCAGATGCTCAACCACTGAGCCATCCAGGCGTC  
CCATGTAATTTCTTTTTTAAATACAATCAAATAAATTCACTCTAACCAGG  
TATTACAAAGTTGCCTAATATGTGATCTGTATGATTCTGGGTCCTATTAT  
TTTTTTCACTAATATGACATTTGAACACAACCTCTTGCTTTCAGAATTAT  
GATTGTTGAGAAGGAAAAAGAAAACAGATATGTGCTAAATAATTATAACT  
GGAAAGAAAACAGTGTTATGTACTATACTTTTACCACATACCTAAGAATG  
AATTAGAACAATGAATAAGTGATAGGTCATGAATGTATTTGGTCAGGGAA  
AGTTTTTGGAGGATTAAGTGTTGAGCCTACCAATGAAGTAATGAGTATGG  
ATTAAAGACACACACTGATTAGGAAAGTCTGCTCAGATAGGTGCCAGCA  
TGAGGGAAGGGCATTGGGCATGGAATAAGCCAGTGGAAGGTCTTGCCTGG  
GTCTGTCAGGGTGCTAATCTTCAGAATAAGCACTGCAAACTCCTCTTTAT  
TCCTATTCTCTATTTTGAACCTGAACCACTTCTGGTCTTTCAAATACAGC  
CCTGCTTGAGAGTAAACATTGGTTCCTTAGGAAGAGGGTGCTATACGCCCT  
CTGCTTTTAACTCTTTTATAACTTGTTTATCTGAGTCCACTGTTCCCTTC  
CCCCCTCACTCTCTCCCTGATTCAAAACAAAACAAAATAAGGTGCCTGGG  
TGGCTCAATGGTTAAGCGTCTGCCTTTGGCTCAGGTCTTGATCCCAGGGT  
CCTGGGGTCGAGTCCCTCCATCGGACTTCCCATAGGGAGCCTGCTTCTCCC  
TCTGCTGTGCCTCTGCCTCTCTCTGCGGTCTCTCATGAATAAATAAATA  
AAATCTTTACACAAACAAAAACAAAACAAAACCAACAATATTCATTCTCT

TCTCTTTTGCCAACCCCCAGCTTCATGGAAAATCCTATGGAGTTTTTCATA  
AAGTTATACTGTAGTTTTGTTTTTGAAAAGATTCATACATTTATGGACTA  
TTCTTTTCAGAGCTCAGATAATCATATCCATATTATTCCAATTTTCAGGCT  
ATGTTTGACCAGGCAAGCACTCCATGATTTTTTTTTCACAACCTTAAATAATG  
TAGGTCGTTTTAAAAAGAAATGAACAAAACCTACACAGCAGAAAAAGAATTC  
AGTATGTCCAGGGATGGATAAGGAAGACTTAAGTGTTTAAGACAAAAAAT  
GGTTACATTTTGAAATGCTGAAATATGAGTATGGAAGGCTTGATATGGAA  
GTAGTATTTACTAATATATCATATACATATTTTTTCCCATTAAATCTCAAT  
ACAAACAGATAGGAATAATATAGCCATGCGGGAATAGAGGCTTTATAAAG  
CTGAGGGCCTTGCCCCCTTTGGGCACAGCTGATAAGTGATAAAATCTAGAA  
TCCAACCTACTTCTCTCTGACATTAAAATCCAAACTTTTCTCATTGTATCT  
CTGCTAGGCAAAGAGTATAGTTATCAGAGGCCTCAAATTTCCCTCCTGGCA  
AGGAGGAAAAACAAAACAAGAGAACACAAAAAAGCTCCATTGGATCAAAG  
ATGCCAGAGAAATTTCCAGAAGTGGTACTTAGTAGAGAGTGCTCACACAG  
CATGCCCTCCTCATTTTCGATGTAAATTGTACACACAAAAGCATCGCACTTTA  
GTCATGCTTATATTTTTCCCCGACATGACAGATGGCCAAGGTCATTTTCATC  
ATTTTGCAGGTAGCATAAGACTGTTCTTTATTTTCCCTGCCTGTCTCCTT  
CTACACTATTTCTTTCTCATGGCTTCTCATCACTTTAAAATTTCCACTTA  
TTTTTTTTTCTTTCTAGGATGAAAGGAAAAAAGAAGTTATCTAAGACTA  
ATATCTGTATTTACCAAAGTAGTCTTAAAAATTCGATACTTTATCACAGT  
AACAGAGCGTTACCTTCAAAGATTTTTATCTTCCCTTAAAATCTACTACTT  
ACCCAGTGCTGAAAATGGAACCTCAGAGCTCATTGAAAGGTCCCAACAGTA  
GCCCTCTCCAGGATGGTCAAACCCATAGTGTACATATGAAAGTCGAAACC  
AAAAAAGAAGTAAACCATCTGCTTCAGGGTTTGAGGAATAGCACCACAGCC  
ATGGCAATGGGGACGAAACTGGTATTTCCATACAGTTACCATCAAATGAA  
TTGCAAATTAGCATCATTTTTCTTGAGTTAGCAGTTCAGATGTTTGAGTC  
TAGAGCCACATCAATTTACCTCAAATCATCCTAAGGAAAAGCTATTCCAGA  
AAGCTACTGGCTTCAAATCAAACCTCCAGGAGCAATTAGGAAGAGAACAAA  
TGGAAGCATTTGGTTTTTCAGGAAACAATTTCTGGTCTGTCCCATTTGCAA  
CGCAGAGGGAGCAAAATTGAATCTTACAGAGATGTGATGGGGGGGCGGGG  
TGAGCGGTGGCGAGAGGTGGAGGCGGGATCAGGAAAAAAGCAGTCTGGG  
TATGGGACCCCTGCCGTTGGTCAGATTCAATTGCTAAGTCTCAGGAAAC  
CCTGAACTATTTCTCCTGGAAATTAAATTGAGATTTGAAACTAATGAGGG  
GCCAAAGTATAGAAGAGTGTGGATAGCATGTGTAGCTAATTATTTCAAT  
CAGAGGGGCCAAAGGACGTTTCCATGCAGCCTATAAACTGGGAAAATTAA  
TCCTAAAAAGCTTGGAGGAAAAAATTAGGGTCCCATCATAAAAAACTAC  
AGATATTAAATCTGCTGATAATTACTCCTCACCTTTCTAGGAGGTTACAT  
TAAGGCCAGGTAAGACTTTTCCGTCTCAATTAGGATCAGTCTGACTCCTT  
TGTGACAATTTGGCCAGGACCAAAGCTATAGCCTGAGCCAGTCCCAGAC  
TGTTCTAAATATTTTCATGTAAGAATTCAATGTTCTGTGGGCACACTTTT  
ATTTTCATAGGAAAATTCTTTTCCCTGAGCAGGGGAAGGGAGTCAACATTT  
ATTATCAGGAACCGTTACTATCTAGTCCATCAAGTGACCAGGTTTGGGCA  
CTCCCCATCTGCAAAGTCCTGTCTCATGACCCTGGTGGCTGTGGCAGGCT  
GGGGGTGGGCCAAACTGGGGGCTTGGAAGGTCAGAGGTTAAAAAATAGG  
GACAGGAGTTTCACTCTCCAAGAGTTTCCAATCCGCTGGTATTCACAATA  
CAGGCCTTATCCTTCTGAAAAGTGTACAGTAAAACAATGATCTTGGCTGG  
TTGCTCCCAAATCAGGCTAATTCTTAGCATCACTGATAAGACTTAAAAAA  
AAAAAAAATTCTGGGTCCCGTCCCTCACGCCCTGCTTCAGTAAGTCCGGGC  
ATCTTTTTTAAGTTCCCTTGGTGACACTGATGATTAGCCAGTTTTTGTGCAA  
TACCTAATTTTTACTTACACAGCATCAAATATGGGGAACATGGTAAAATTT  
CAAGGATTTAAAAAGAAACTATTATTACTACTGTGTCTTCCAGATGATCA  
TCAACATGTAGAAAAGCCCAATCTGGCCAAAGTAGAAGTAGACAAAGGT  
AGGGTCCATGAGGATGACAATCCACAAACATTTAGCAAATGTCATTTTTT  
TCGAGCAGAAATGAACACACCACACGTCACGCGCTGACGGGGCAGGCAAT  
GTGCACACTCCAGGCACAGTGTAACGAAGCCACCAGTAATTGCTAATCAC  
CATGACATTATTGCTTGTGTGTGGACCACGTAGAGCTGGGGATGGCAAAT  
TTTTTTCTCTCAAGAGCCAAAGAGTAAGTATTTTAGGTCTTGTGTGCCAT  
AAAGTCACCACCACAACCAAACTCTTTACTATGTTACAAAGACAGCCACA

GACCTTACATAAGTGAACAAACACAGCTATGTTCCGATAAAACTCGATGG  
AAACCGGAATCTGAATTTTACATAATTTTCAACAAGCCATAAAATCTTAGT  
TCCCTTTGCTTTTCTACTCTTTTCAACCCTTTAGCCCTTTCTTAGCTTGC  
ATGCCACGCAGAAACAGGCCCTGGACAATTCAGTAGTGTTAATGACACCG  
TGTGGTGCAGAAAATGTCTAAAACACACTTATCTTGCATAACTTTGCATA  
TTTATTGAAATGAATAGAATTTATTTCAATCGAACACTTCCCTTAAAAA  
TTTGTGCGAGAGGCTAGATCTCACGTTAGGAGTTCTTACCCCAAAAATACA  
AAGCCAAAACGAACACAACAGAAGTAACAATAAAAAAACCCCAATGGGA  
CACAAGGGAAATTTGGGTGAAGGATTCTTCTATTTGATTGTGGTGACAGT  
TTGAGAGGCATCTGCATATGTTCAAACCTCATCAAACCTGTATACATTACGT  
ATGTGCTCTTTTTTTTTTTTTTTTTTTTGGTATATCAATTACATCACTTTAGG  
GCTGTTAAAAGGGCAGTCTGTGGGCCTGATTTGTCCACAGACCTTAGTT  
TGCCAGTGACCCGTCTAGGACCTAACCTGCCGTTGGTGCGGCAATATACA  
AAGAAACAACCTGAAGATCTTTTCAACTTGTACATCGGAATCCGGCATCTG  
TGAGTACTCGGTCCCCCGGTGGAGCACTGGGCGTGTGTGCTTTAGGGATG  
CACCTGCCATTACAGAGGGAAAACTTACCATATTTAAAGGTTTCCCAAC  
CCCGGCTGCAAAGAACATCTGATTTTTCAGAATGATGTAAATCCCAGCTTT  
GCCTGCCAGTAAATTCATGTACATCGTGTAAACATCAGGTTTATATTAAA  
CATTTACATTAAAGGATTGGATTGGAAGATTAAATTGTTTGCATACGCTGC  
CGCCTAGAGGGAACGCCCCCCCCCTTCTCTGCTTTCTCTGCCAATGGCAC  
CAAATTAGTGACCCATCCGAAAAGTGTGGGAGACAATGGCATCTGGTCCT  
TGGTGAAGCTGGGCAGACTGTGTCTCTCTGCCTGTACCTTAGCACAGG  
CAATCGCCAGGCAAGCTATATCCTGCAGTGCCCCACACAAAGAGGATTAA  
TTAATGACACCGAGGATAATGCTCCAGCTTGAGTATCAGAATCTCTGTCC  
TTTCCCTAACACTGGTATTTTGCTCCCCACAAAAGCATGACTTTTTTTTGC  
TAGTTTGATTCAAGTCAGTTGAATGGCAGTGCTGGCTGTTGGTGGGGTTG  
GGAGAAATCCTCAGCAACCCATTGAACAGGGGGGAGACCAAAGGTGGTTC  
TCAGTCGGGTTTCTAACAACCACTGCTGCCTTTGACTCAGAAATGCAGCC  
CCAGGCCCTGGACATGAGAGGGACTCGGCCTTGCCGCTCCCGTGGGCCAG  
TTCTCCCTGCCATGAATGAAGAGTTGCCCAGGACACTCGAACAAGCAAAT  
GGTCTGCAGAACAAATGTTTTTGTGGGAAAAAAAAAAAAAAAAAACAACC  
ACCACGGATGCCAAGTGAAGTGGCTGGAGAAGAGTGATGTTGTTAAAGTG  
TATGATTCAATTAAGTCTTGTCTGAGTGTGAGATGTTTACGATTCGATGCT  
ATTGCCTCCAATTTAAATCATTTTTTAAAGAAGTGGCAGAAAAGGTGCTGA  
AAGGCACCTCACTCTGTTCCCGCACTTGAAAAACACTGTCTACTTGTGCG  
CTGTGGTAAAACCTTTGCATTTTGGCTAGACACCCTGTGTGGAGCTGCAGC  
TTGGGCTTTTTTTTTTTTTTTTTTCTTTTTTTTTCTTGAGTTTGTACAGT  
CACCAGAAGGCAGGAAGAGAACATAGTATTTCCACAAGCCAGAGTCTCTC  
CTGATGGCATCTGTAAAATAAAAAAGAGGTGCTAAGTGGTCAGCAGTGAG  
AAGCCCCATTATGATACAGCCTCCAAGTCTCCACAAAGTGATTGCCTCCT  
CCAGATCCCTGAGGGTGTGGGCTTTTCTGTGTCAGGAGTCTGTGTCTTCTAG  
AATTCTCTTCAGAACCCCTGGAAGTCTGGAGCTGCCACCATGGTTTACC  
ATCACCAATTACAAGTGAGGCTAATGTTGCTATCACACGCTGGATTCCCTA  
TCAGTACCCAGTGACCTCATGGAGACCCTAAACACGCTGGCCCCCTTGACA  
TCCTCCCCCGAATGTCCCTGAGGGCCATTGCTACCACTATCTGCTCACAC  
AAAAAGGGATGATGGTACCTTGAGGACGTGAGGCCAAGTGAAATAAGCCA  
GTCATAAAAGGACAAATAGGTTATGGTTCCACTCACAGGAGGTAGCTAGA  
GTAGTTAAATCATAGAGACAGGAGGTAGAATGGTGGTAGCGAGGGACAAG  
GAGAGGAATGAAATGGGGAGCTAGTGTTCATGGGGATGGAGTTTCCATT  
TTGTAAGACGAATGAGTTCTGGAGGAGGAGATGGTGGTGGCTGGACAAC  
AATGCAAATGTACTTAATGCCACCATACACTTAAAGGTGGTTAAGATGGC  
AAATGTTATGTTATGTGTATTTTACCACAATTTAAGAGGATGGCCTGGGC  
CAAAAGGTGGTTACAACAGCCCCAGTTGAGACTCCAAGTTCTTCCCCAGG  
TAAGGTGAGTTAGAAGCCATAAATGAAATCTTGTTTTCTGGGCCATTGA  
TCTGGGGCCTGGGCTTCCATATTTTTCAATGTTTTTGACAGAGATGCCAT  
ACATTTTTTTTAGAACTTCCCCAGTTCCCTCAGGTTGTTGCCGACCTAGGC  
CCTCAGCCGCAGACTAGAAGATGTTTGACCCAGCAGAAGAGTTACGGTGG  
TTGTGTTTCTTACAATTCAAAGAGAGCACAGCCAGTCATTGACTGGAGCT

GGAATTTGGTTCAGAAGTTAGACAGATGAAGACCGCTCAGGCCATATGAA  
ATATAATCACACCAAGAAATAATAATGATGCATAATTTGTTTAGCAATCA  
ACAGATGATAAATAATATGTGTATATGTATATATAAATAAAAGTATATGC  
ATGTAATATGTATATCTATAAATAAATGTATAGATTTCCAAATGTTTTCA  
CAAATATAGACCACATAGTACAGCAAAGCCGTGGTGAGTTGTCACCATGG  
AGGGCCTGCCACATGCCAGTTGCCATCTTTACATTTTGTATAATTTTCATC  
CTCAGCTCAGATTCAGGTGTTTAGGGAGGCCAAGGGGCACTCTGGTGGCT  
CAGTCGTTAGGTGTCTAACTTTAGCTAGGGTCACGATCTGGGGATCCCT  
GATCAGTGGGGAATCTGTGCCTCTCTCTCTGTCCAACCTCCCCTCTCAC  
TTGCTCTCTCTCTCTCTCTCAAATGAATAAATAAAATCTTTTAAACG  
AGGCAGAGAGAGATAGGCCAAGATCACCTGGGTGGTAAGTGGAAGAG  
ACATGATTCTAAGGCAGGATTTTTTTATTTGTTTGTGGTAGTGGCC  
TTTTTTTCTCCCAATTACTATTTTTGCCTTTTCCCTAATATAAGAGTCA  
AAGAAGAAAGGAAAGAAGGATAGAATCCTATGAATCTCTAGGGGATAGAT  
GAGATTCAGTCCTTCAGATAAGCTAGAAGAACATCTCCTGGATTTCTTAG  
CTCTGGAAGGCTCAAGAAAAATCCTTGGTAAAAAAATGGTAACCAGAAT  
CAAGGCCCTGGAATAATGGTATTAATACTAAGACTTTCTTCTTTATTCC  
ATTGAATCATTTTTTTTTTAAAGCAGCACACATTTATGTTGTGAAAGCAGAA  
AGAAATACAAACAACAACAATAAAAACTTAGTAAGAAAAAAAAGA  
AAAGAAAAGGGGGAAAACACACTTAGTACCAGTTATTCTTACCATTAGAT  
TGCCAATCACTGAGATGACCAATTCTTTAGGTGCACTTTTGTGCTCCATC  
ATCCGAAAATGCAAACCTCTTGACATACCACCCCTCCTCTCCTTTCTATC  
CTGAAGGCAGATGCCCACCTACACTTATCTTTTCTACAGTGACTTACAGA  
CAGATATCCCCAAATCGCAGGCTCAGGAACCTGGAAGGAGCCCTAAAACA  
GACCCCTGCAAGCCTCTCCTTAATCCTTTCCAGACAAACGAGATAGGATT  
TCAAAAAGATCTTCAAGGAAATGCAAATCCCCTTCTATTTTGGTGACCCG  
TTTTGAAGCTTTACTCACATGATCAGAAAACTTTCAATTATCAATACTCT  
CAAGTTCATCCTGCTGCAGTTTCATCCTCTTAAAAAGAGTGATCTGCCC  
AACTTTACGAAAACCTCTCCTCGAGTATAAAAAATGAGTTTACGAACATA  
AATAGGTTGAGTGATGGTGGATAACGTACCAAATAATACCATTGTCTGCA  
GAAGGCCATAGTATAAAGAGTCTTTTAATAATGTCTCGTCCTAATACTTT  
TAAAAATAGATTTCAGCATAAGAATATCTATGATATGGAAAACCTTGCAGA  
ACCACGTATATTGAGTAAGGTTAAAGACCATTGCACATATGAATTTATTT  
AGACAATGCTTTCTGGGGTCAGTTTCATCTCTCTGCTCCTATCACATGCC  
TGCATAAGCAAATAAAATTTCTAGATATATCCACCTTGATTGGACTTTG  
CTGGTCTGTGTGCATTTGCATCTGTCCATGAATGAGTCCATTTCAAGCAC  
ATGTACATGTCTGTGCATGGGTAGAAAGATAAGCTTAGCAATTGTGTGAT  
TTGTTTCTGCTTAGGCAGTAAGTTACTAATCTCCTGATTGGAACCAGATT  
TGTATGAATTAGGAGTTGAAATTGGAACAGTCACTGCTGTGTGCAGGATG  
TAAAGTGAATAAAATGAATGGGGTATTAACCTTCAACCACTGAATATTAA  
TCAGCTTTTTCATAAGAAAGAAAACACAGAGCTTGCCACACTAAATATTTT  
CAGCGCTTATTGACAGGATATGATTTCTTTTCTCCCTTAGCCCTGTTACT  
TCCAGGCAAGGACCTGAACACCGGACAATAGCCTGCTTGACCCAGACTGA  
TGTATAATTTGAAAAACCCACGTACTGTGGGTAGGTCAGACTCTATGCA  
TGTGTGTCTTTCAGTCACTCCTACGAACACTGGCCAACTAAGCCCAAAG  
GAAATTCACAGAAGGACCATGGACAGGAAGCTCTGATGACCACAAAATGA  
ACATGTAAATGAAATACATTTCCCATTTGTCCTGGAATGGACTTGCAATTG  
CAGGATGACTCTGGATGTTTGGATGAGATCTTCTTCTAAGCCAAGGGGGA  
TTAAAAAAGAGAGGGAGTCATGTATGTAATCATGGAATCTGGGTGAAAAC  
AACTTGCAATGGTCTTGTGTGTGTGTGTGTGTGTGTGTGTGTGTGTGTGT  
TATTGTAATTGCTTTTTATTTGAGAAAGTGAGGTCTTGTATATAAACCTAT  
GTAATGATAACAAAGCGTATTTATATCAATATCTATATTTATGCATATCT  
ATCGCCATAGCAATCTTATAGACAAATAGAAATGTACATGTAGTATGTTT  
ACATAATGTCATAAAGAAGGCAATGGATTCTTATTTCTGAAGATATTT  
TGAAATAACATATATTTTATTTAAACATTACATATCTATATCAGTAAAC  
TACATGTGTAGTACTACGAAGAATACATATCACGTAGCTAGGCTTAAGTA  
GAAATCGGGCACAATGTTAAAACTAAGGAGGGTGAAAGGGGAGGGGGTA  
GATTTCTTCCATAGCCAGCTCAGGCAAATCCCTTCAAATATTTCTCAAAT

ATTTTTGAACATATTGAAATATTTTTTCATTTATTTGTAAATCAGTAGGT  
ACCTCTCAATCTCAAACATTTTAGCATAGTATTAAGTAAATGATTTTCCC  
CTTGGTGATCTATTTTTATTTATTTTATTTTATTTTATTTTATTTTATTTTATTTTATTTT  
CATTTTCATTTTCATTTTCATTTTCATTTTCATTTTACTGTGTTTTATTA  
TTTTATATTGTTTTTCCCTGTAGGTGAGCTTTTCTCCATCTATAACCACCT  
AGTTTAGACCTTCACTGCCCTCATATGCTGCCTGCCAATAACCCTTGATC  
CAGAACCTGAAGTAATCTCATATGTAACGTCCCATTTAGCATTTAAAAA  
ATGAAATCATTTTACTCCTTTTCTTTTTTTTTTTTTTTTTTTTTTTTTTT  
AAAGATTTTATTTATTTATTTATTCATGATAGTCACAGAGAGAGAGAGAGAGGC  
AGAGACACAGGCAGAGGGAGAAGCAGGCTCCATGCACCGGGAGCCCGACG  
TGGGATTCGATCCCGGGTCTCCAGGATCACGCCCCGGGCCAAAGGCAGGC  
GCCAAACCGCTGCGCCACCCAGGGATCCCCATTTTACTCCTTTTCACTGG  
CAATGACACTAGAAACCCATCCATTAGGCTAATTTACAAAGGTGCTGAT  
GACCAATAATAGCTTAATAGGTTTTCCTGTAGGAGGATTCTTTAGAATTCT  
AAAGATACTTCTTGCCCACTCCCATGATTTCCAACCCCTAGTTATTCAAA  
TGATCAATCTAGGTACCATTGTTAATTTGCAGAGAAAAGTTCAAAGTGCTA  
ATCAGCTGACCTGAAGATAGGGGAATAGCCTGGATTATCCAGAAGGGCC  
CCTGGAGTCATGTGAGCTCTTAAAAGAAGAGGAAGACCATCAAAAGGAAG  
AGATGCAGCAGAAGTAAGCACAAAGAAAGCAGGTCAAAGGGGGGGAGGGGC  
AAAAATGTGAATTTGGACTTGACTTGCTGTTGTTGGCTTTGTAGAAGAAGG  
AAGGAAGCTGGGAGTTGAGTGCTGCTGGTGACCCCTACTGACAGCCAAC  
AAGGAACTGAGGCTGCAGTCCCACAACCCTGAGGAGCTGAATTCAGCAA  
CAAGTGATGAACCTGAAAGGGACTCTTCCCCAGAGCCTCTGGCGAGGAA  
TGCAGCCCTGCCAACACCTTGATTCAAGCCTAGTGAGACCCATGTTGGAC  
CATAACCTCCAAAGACTATGAAGTATTCATTTGTGTTGTTTAAAACCACA  
AGTTTATGGTAACTTCTTATAGCAGCAATAGAAAACCAATACAGGCAACC  
CCCAAAGACCCCTGAGCCCAATCTCAAGAGCACCCAGAAAGGCCTGAAA  
AGAAAAAGATTGCTATGGATAGGGCATCCCTAAGTCTCATTTGTTAGATTA  
CCTGTGTTTACAATTGCCTTTAAGAGATCATAGCTCCTCATCTATGGAGG  
AGCTGGTTACAGCATGGTTAACTTTTTTATAATAAAATGTTGACCAAAAG  
ACCTGTGCACAGGTGACAAAGCAACAATAACTGAAAGTAAGAGAAAATCC  
TTAATAATGAGGCCACAAGAAAGTATGTTGTGATAGTACATGTAAAGGGA  
ATATAGTAATTTACCTGAGTTTTTTGTAGCCCAAGGCATGTCATCAAAAG  
GCAGTGCTGGTTGTCTGACTCAGTGATAAATCAGACCAAAAAACAAAAA  
CTAAAAGAAGGAGAGAGACAAAGGGAAGAGAGAGAGAGAGAAATAGATATC  
CAGATACTTGGAAACAAGGAGGACTTTGGTTTAGATTACTTTAATTGATGC  
TTCCATAATTCTGTATTGCAATTTCCCCCAAGATCTCCTGGCCACTTCTC  
AACATCAAATAGCCCTGGTACTGACAAGCCTGGGTCTGCCTAAGCAGATA  
ATATCAATTTGTAATCCTGGAAGGCAAAGTGAAAAGCCCTAGGAAGAAAA  
TGGAGTGACTCAGCATGCATATTGAGAATGGAATCCAGAACTCAAGGCA  
CAAATGCCCCAATTACGTGAAGGGAGCCTTATTTGGAGGATGTTAGAATCC  
TTGCCCCCTTCCCACCCATCTGAATTCCATTGGCATTGCTAGCATCTTCT  
CTTCCGTCTACTGGGTTTCTCCCTTTCTGTCTCCTCAACCAACAGCCAA  
ACATCTCCAACCCCCAAATCTTGAGGCAAATAAGCTTTAGCCAAGGATTT  
GCATCTCAGTCTATGAGAACCTTAAGTCTCTCACTGAGCTTGAGAAAAC  
CCTTTGAACTGATAAGGAGAAAAAGAAACAATTTCATACAAGGTCCCTACA  
GGAAAAAGAGAGAATGCACTGGACAAAGAGTTGGAGTCGGGATGCCTGGG  
TGGCTTAGCAGTTAAGCGTCTGCCTTTGGCCCAGGGCATGATCCTGGAGT  
CCCAGGATCGAGTCCCATGTCAGGCTCCCTGCATGGAGCCTGCTTCTCCC  
TCTGCCTATGTCTCTGCCTCTCTGTGTCTCTCATAAATAAATAAATAA  
CATCTTAAAAAAGAGAGTTGGAGTGACATCAGACACTCCAACCTTA  
TCCCCCTACACTGTCTGCTTCTAACGTCTCTAGTCTCCATCAGTTAGAA  
GGACCTGCTAATGGAGGAGAAAAAGGAAGGGTTTCTTGATATTTATG  
TATTTATGGCCAGAGAAAGCCATGCGCGGCTCCTGGGATGCCAACATTTA  
TAAGCCTCTGATCCTCTCGACTTTGATTTGATAGTCTTTGGAAGCCAAAA  
GTAAGGACAAACCCCCCTAAACAATGACATTGGCTAACCCAACCTTCTAGC  
CCTCACTCTCCACAACACTGGACATAACAGTGATCTCCAATGGATTGCTA  
CCATTCTTCCGGTCTCAAAGACACATAGCTACATGAGTTGGCACGATAGG

ATATAAAAGTGTAACCTCTTGTCCCCTAGACTACCTCCTTGTGATATCAT  
TTTTAGAGCAACATTTTTTTTCAGTAGCTCTACAAGAGTATGGAAAAGTGC  
CAGCCTCAAAAGATAATGGATTTCCTCAAATTGGGAAGTCTTCCTCCAAG  
TCCAGAATGATTATAGAGTGAGCATGTTCTATCCTTGGGAGCACAGGGCT  
TAGAAAGGGGAGGGAGTGAAGGTCATGACACCTCTCCTACTACTATACAG  
TCCCATTCAGAAAGTAGAGTCCTAGGATGATTAAAATACTGTTTTTGCAG  
CTGTCACGCAAATGCTATTTAGAATTCGTATTCTGTATCCCAGGATTTAA  
TGCAAATTGTCCACATAACGGAGGGTCAAATGATAATTTAGATGCAATT  
AGCCAGATGTGTTGGAGTGAAATTTCTCCACAACCCCCCAAATTATCT  
GAATAATTTACACACACATAATCACCTTACTCCAGTGGGAAAATAGTATG  
CCCTTGTTTTATTTCCCCCAAATACCTAGAGTTTCCAACAGTGTTACATCA  
AGAAAGTGCCAAGTCCAGGGGAGCAAATAAGATAACTCTGTGAGGCCAAG  
CTGTCTCCCTTTTAAATGCAGACAGAATTAATTTGTTTTTCATTAACCTCT  
TATCAAGTTACCTGACTTTTGATTCCCAGCACAAAATGTATTTTAAAAAGG  
GGGGTGGTGGTAGTGATGGTGGTAGATTTTTCAGGAAATAGCAAGTTCTTT  
TTCTACTGAGATAAAAAATCATTTGGCAAGCCAGGGTGAAATACTTCTGGT  
TTCCAGTAGAAAGAGAGAAAAAGAAAAAGAAAAAGAAAAAGAAAAAGAA  
GAAGATGCTAATGAACCACAGAAGAAAAAGAAAGGAAGTACTTTTTTTTTT  
TTTTTTTTTAAATAAGACCTTACTTTTGAAAACAGCTCAGTTTGCAACCAA  
TTTTTGAAGAAATGTCAAAGTGATTCCCTTCGGGAGCTATGTCAGGGCTAA  
ACCAGGCTGTAGGAGTGCAATAAAGTGAGCAATTCAGATGACTTTAATTA  
AAGGGCCCAGGACCATCAGCACTGACCTTACAGACACAGCCTTTTATCTC  
CAAAAAGGATGAATCTGGTAAGAGCCAGTAATACAGGGCAAAGGGATGGA  
GCCTTGGAACCTGGGTGCTCAAATGCGTTGTGAGAGTAACTGTGTTGGGG  
GGACAGCAGGCTGCTCCTTGGGAAAGCAGTCTGTTTTTATAATTATGCAT  
TTGAAAGAAGAAGGGGGCTAGTGAGGGAGGATGGGACTCACAGATGTCTT  
CAGGGTTCCTTACCCTCTTAATTGTAAGGAGCCTTTAGAACCCTTGCGC  
TCCCAAGTGGGCACCCTCCTCCCATGCTCCAGGATTCAGATGCTTATGTG  
AGAAGAGATGTTTCATCAGGAAGGTCTGGGAAGAAGGTAAGAAGGGAAGCT  
TGGAGCCAGGGTGATCCCTGCAGAGGATCAGCCCTTGCTTGGAGCCATGT  
TCACACCAAGAACAGCAAGACCCCTTGCGTCTGTTCTTAAATGAAGACAA  
GCCAGACATCAAAGTTGCTTGCAAACCTGCCCCAATAAAAGCAGCTTAGAA  
GCTATCGGTGAAAGAGGTTCATCAGCCCAACTCCCACTCCAGTGAGAAAAT  
AGGTCTCATCAGTTGGGACTGAGGTGGGAGACCCAAAGCAAGAACTAGG  
AATCACAGGGTCTGGAGGAGAAGAGGGGATTGTGGAATGTTACTGTTTGC  
ATTTGTCCAAATCCAAGGAGGGGCTACCAGCTTTTTCTCCCTTCCTTG  
GGAGGGATTAAAGACAGTCGAGGTCCCCAAACACTGAAAAGATTATAGTCC  
TCTCTATCCCCTGTCTGTCTTGCCATCTTTCTATCTGTCTCTGTCTGT  
CATTATCTATCTATCTATCTATCTATCTATCTATCTATCTATCTATCTAT  
TATCTATCTACAAAATTGTGATTGTCAGGCTATTCCCCAGTATGCTGGGT  
TTTTTCTTTCCATGCACATGGTGGTATTGCCAATCCCTACCTCCCTGAAG  
TCAAATATGCCATGGGATTTGCTCTGGCCAATGGAAAGTGAGTGTAGGAG  
ACGTTAAAGATGTTTTTCAGGCAGAGTACTGACTTTAATAGCCAATGCCCA  
ATTGCCCATGTTGTCTCCCTCTGCCAGGAGGCCAGGGCTGCTCTGGTTA  
CCATCCTGCTTCCCAGAGCAAAGACAGAGTGGTGCAGAACCACCCACCT  
CAGTACTCACAGCCCCCTGCTGGCTGACCCACAGCGAATGTGCTATACAAA  
TAAAAAATATGTCTTTGTTATTTTCAGCCACGGAGATTTTGACATTGTTT  
TTTTGTTGAGGATACAAAAAATATACAATAATAAGAAAGAAAGTTTGCA  
AGATTTCTTTCCGAGTGACTACTTTTGATAACTTGGCACTTCTATGAAGT  
AATCAAATCCTTTCAAGAATTTCTCTCCTTTTTATGCTTATGCTATTGCA  
GTGGTGTGTTAAGTATGCACCTCATCTCTGTCTGGGCGATCCAATCCTTCT  
CACATAGAAACTCTATCCTGCGGTAAGCACAGCAGACCTCACGGGCTTTT  
TATTTTTTTAAGATTAATTAATTAATTAATTAATTTGAGAGAGAAGGGAG  
GAAGGCAGAGGGAGAGAGGGGAGAATTTTCAGCACACCCCAACTGAGCATG  
GGGCCAACGTGGGGCTCGATCTCAGGACCCTGAAATCATGACCTCAGTC  
AAAATCAAGAGTTGGTTGTTTAACTGACTGAGCACCCAGGGGCCCTCAC  
CGACTTTTAAGTACTACACTGAGATCCTTCTACTGTCTATCTGCCAGTCAC  
ATGTCCTTGGAGAGTTTACTCAAACCTCTCTAAATCTCAGCTTCCTTAGCT

ATAAAATTAAGATTGTAATTCCTATCTCTCCGATTTATTGTGCCACTGGG  
AAAAGGTATACAACCTTGTAGTGATACCCCTATTCTACACCCCATGCTTC  
CTCAGAAGCATTTACCTTCCATAGAAATGGGGATGACAATACCTCCCTCCC  
TCCCACCCAGTAAGGAAATTGGCCAACCTGGAGCCCTTACAGTAAATTCA  
TAGCTATTGATATAATCACTGTGATCGCCATTATATTAATAAATCACATG  
GGACCTAATATGTATTCAATAAATCTTAGCTGCTTCCCTTGCCCTTCATG  
TTTAGGAGTGGGGTCATTCAGAATAGCATTATCCATAGCTAATCAGGAGG  
GTGGCCAACAACCTAAAAAGAGAAAAGAATTAAAAAAAAAAAAAGAGTC  
TCTGCTTTTAGACCCATTTATGACGAGACATGTCTGGATCCTTAGGATGCC  
AGGTTTTTTTCCATTCTGCAAACACATGGCTTCCATTAGTTGACTGATACT  
GACACATCGGAGGCTTCCAAAGTCCTCTGGGCCTCTGATGAGTGAAAGGT  
TTGCATGCCCAACAAGGAAAAGGCAGCCTCTGCCGGTGTGAAAATGCTGC  
CAGGGGTGGGGCAGTGGAGGTGTTGAGTTTAGGTAGGAGACCAAATCTGG  
CTCTGTTTTTAATGACCATCCTGTCCACACCTGAAAAATAAAGTAGCCACA  
CCTGGTGAGATTCCATAACGCTCTGGAGCTCCAATGTTGATGTCAGTGTGC  
ATACAGGGCCTCCATTAATCAGAGTGAGTGTTGTGTGGTGCCTGCTCACC  
AGGCGCTGCAGAATAGTGAATAATTTGCAGTGTGCACACACTGTCTCTCC  
TGAGCTTTCTCATCCAAAGCAAACCCAAGCTCCAGTGTTATGCTCCTTTT  
AGTTTGTGTTCTAAGTTCACTGTTGTTTGGACTTAGGAACAGTCCTGAAT  
TCTAATTAGTTTGCAGTTGGAGCCTGCATAATGGTAACTCTATCCTTTGC  
TTAGCCGTTATCATCTGTTTCCCGTCTTTAAAGCTGCATGGTCCATTTTT  
GTACTGCACAATAGTGATACTCGCGACCTTGTTTCTTGTTGGTGTCTCA  
CAGCAACAAGTTCTATTTAAAAATGGGGGAAGTTGGTGGCATCGTTGATC  
TGAGAAATTTGGGGCAATTCTCTGCTCTAAATTGCATACCGAGGGGATGA  
TTCCAAGAAAATAAGTCTTTGTATTCTCTATTATGGAGAGGATCTTGATT  
ACACTTAGCCAGGACAGACATGTTACCTCTCAAAATATTTGCAGCTTCAG  
GCTGTGCAGCAAAGGTGAGCAAATAAAAGTGTAAAGGAAGGAACAGTGAAG  
GTACATTTGCCTAACACTTCAAACCAAGCTTGTTGTTTTCACACGTATCAA  
ATCACTGGATTCTTTCAACAGCCCTGTGGGCTAGATGAGCAGTTACTCTT  
CACCCATCTTAGGCAAGCCGGGACAACCTGGTCACCCTACAGAAGGTAAAT  
ACTTCTCCATCCCATTTTGCAGATGAATGAACTGAACTTGAGGAGTCC  
TGAGGTCATACAGCTAGCCAGGCTAGTGGAGAATTTATTTTTTATTTTTT  
ATTTTTTAGAGAGAGAGAGACATATGTGTGTGCATGTGCATGCACTTTT  
GGGCTGTGGTAGAGGGGCAAGGGAGAGAAAAGAATCTCAAGCAGTTTCCAT  
GCTCAGAATGGAGATAGAGCCCCAATGCAGGACTCTGTCTCATGACCCTG  
AGATTAAGAGTCAGGTACTTAACTGACTGATCCACCCAGGTACCCCTGGG  
CTTGTTGAGATTTTTTAAATCTATGTTTTTAAACCATTAGAAGATACTAGC  
TAAGAAAGAGCTTCTTCCATATGGGAGGAATTTGTAGTACATCCACAAAGG  
AGTGAAGTTAGCTATTGTTCTCCTTATTAAATAGGGCTTAAGGGCCATCT  
GATGGCTCAGTTGTTTAAAGTGTCCAACCTCTTAATTTAGCTCAGGTCATG  
ATTTGATGGTCTTGATCAAGCCCTGCCTTGAGCTCTGTGCTCAGCAGG  
ATTTTGCTTGAGATTCTCTCTCTCCCTCTGCCCCCTCCCCAACTCTCATA  
CTTCTCTTTCTCTCTCTAAAAATAAATAAAGCAATTTTTTTTGAAAAGGG  
TTTAATATTGTGCTAAGCTGTGTTTCTCTGTTGTTGATATTATTCTTATT  
TTTCTATTCCGTTGTTGTTATACTTCCAAGTGACTTGGGGCAAAATCTGA  
AATGTTAATTAATAGACTTAGTTTTTAAACCAGTTGTCATTCTATCTTTGA  
GGAAGAAAAGACAATAATGTTAACATTAACAACACTCAAGAGTTGACA  
TCTGATTCAATTAAGAAATGAGCTCTATTATATTGTTTTTCTATTTTCCAC  
TCAAAAGAGATCTTGCTAGCAGGGACTTTCTGTGAATTTTAATTTCAAA  
GGGCACCAGAGACTCTCAAAAGACATTATCTTAGCTCCTATATACTTCCC  
AAATGTATTTTAAAAACACATTACCTATGATACTGTCTCTATAAAACAGA  
CTCAGAGTGGGATCCCTGGGTTGTGTGAACCAAGGTGTCATGACCTCAA  
ATTATAAGAAGGCCCAGGAAGAAAGTTTCCTTATGAAAAAGGATTTTCCA  
GCTTCCAAAACAACGTCCATAAATGGATTTACTTAAGCAAAAGCTTAAG  
TACATTTCAAAAGAAACAGTGATCATGGCTACAAGATGAGCGATACATA  
AATTTAAGGGTACTTGGGGACACTCTAAATCCCAAGGCAAAATTGACT  
TTCTTAATTTGATAGAGGAATAGGTCCAGTTGGGAGCTTTGGCTGAGTCT  
GTTTTTCATGAATCATTTTTATCTGTGGACATGCCTTATAAATTAAAACCTT

ACCTAAAAAATAAAATCCCTAGATGTGAGATGATTAAAGTTTCAAATCT  
GGTCATTTGAAAATCACAAAAGGTTGGATGAAAGTGATACTGTTTTGAGG  
ATTTTAAGTTTCTTTTTAAAATCACACAAGTTGCTGAACTTATAAAAAGT  
CTTTGATTCAAATAAAAAGTGAGGGCTTTTGGAGAGAGTCATTTTCTCTG  
TTATCAGATGCATTTTAGTGTATAGTTTTTCCACTCTGGCGTATGTGGATG  
TCTAGGCTTGCTTCCATCAATTCAATTAATCTCTGATTCAAAAAAGCA  
TGTTTCCTGTTTATCTTTGTCCAGACTGAGTGCAATCTGTGCTTCCTAGC  
TCTTCCAACAATCTCAATTTTCCAAATTTCAATATCAGAATGCATGTGAGG  
GGGTAGCCCTGGTGGCACAGTGGTTTAGTGCTGCCTGCTGCCCCGGGTGT  
GATCCTGGAGACTCGGGATCGAGTCCCACGTCGGGCTTCCTGCATGGAGC  
CTGCTTCTCCCTCTGCCTGTGTCTCTGCCCCCCCCCTCTCTCTGTGTG  
TCTCATGAATAAATAAATAAAATCTTTAGAAAAAAAAAAGAATGCATGT  
GAGGCACGGTAAATCCATGGTTATCTTGACAGATTGGGAGCTGCATATCC  
ACAGGGAGAAAATTAAGGCCTACTCCCAAAGACACCCACTTACCAAAT  
CTAATTTCAAAAAGAAAAGATCAACACTTAATTTACTGCAAGTGAGTGAA  
GAGGGGAAAAGAAAAGTTAATACAAATAAGTGCTGAGCTACAAGTTTAAAA  
ATGAATAGAAGAAATTTCTCCCAAACATATAATTTTCATATATAAGCTAG  
TTGCTGAACTGAAGAAAGATTAGCATTCAACACAAGCTCACTTGAAATCA  
ACCCAAATCAGACAATTGAACCATATTTATTACATCCATTTCTTGAAAT  
AACAAAATTCATTGTGCTTCAGGGAACTTTGATAGACAACAGTTTGACC  
ACAGAGGCCAAACATTTTAAATGTCACATACTCACCAAGTCAATATACAGA  
TGAGAACATTGAAGATGATTTTTTGTACTACTAATAGTCCTTAGTTTTT  
AATAATTTGGTCTAGAATTTATAGCGATATCATCCACTTCATTTGTATCC  
ATCATTTGCACCAAAGAGATGTCCAACATCTAATATATAAATATACAAACA  
AATACATGATTTTTTATGGCCACAAACATTTGTTTCCCAAAAACATTTGCA  
AAATTCTTTTCTTAGTTTCATGATATATATTTAGAATCTGTCCTACTAC  
AAATCCTTAACCCCTCAGAAAATCAAGACTTAGAGAAATTAGTAATTCCTCT  
ACCCTCACCACACATGCATACACATGCATACAGCAATAACTTCTGCAAAT  
TAGTACACTGAAGAAAAGAGAGAAAGTACAGTCTACTGCATGAAATAGCT  
CACTTAAGTTCACTGTTTCATGGGGAGCAAAGTCTTAAAAAAAAATAACCCC  
AAAGATAATATTTTTGGTTATTCATTTGTTTTTATTTCCAATTCCTCATC  
ACTTAGTTAACATTGGTCTTTTTTAAAAAGACCAATTTATTTGTGAGGCG  
CCTGCGTGGCTCAGTTGGTTAAGTGTCCAACCTCTTGGTTTCGGCTCAAGT  
CATGATCTCAGGATGGTGAGATGGAGCTCTGCATTGGGCTCCATGCTGGA  
TGTGGAGCCTGCTTAAGATTCCCTCTCTCCCTCTCCCTCTACCCAACCTC  
TCTCCTCACCCCTCCCCACTCAAGTGTCTCTCTCTCTCTCTCACTCTCAA  
AAAAAAAAAAAAAAAAAGCAAAAGAAAATAAGTTATTTGTGAATAGGAGTAA  
TGAGTTGGGAATTGAATTCAGGTCTGGCCATTTTACCTGAGCAATGAAAA  
CATAAATGCCCTGGAGCCAGCAAACTGTCTACCCCTGGCAATTCCTTT  
GTTTCCTCCTGAGATTGTCTAATTATACAGTAATGCTGAGTATTCTTCAT  
TTGTAGATTAATTAGTCGGTGCCTAAGCAGTTCTTTGAACATAAAAGGCA  
ACATGTAAATCTAAGTGTAATTATTCATCCTCAAGCTAATGATCATTAA  
TTAGTGTTCCTGCTGGCTTAATGGTCCATAAAGAAGAGGGTAATTTGGG  
GAAGGAGCTTCTAACATTGCTATAAGAGAAGTTTAGGATTGTAGCTCTAA  
CTAGAATGAAAAACAATATTCAATGTTTAAATAAAGCCTTTAAAATTAG  
AAGTGAATTGAAAATTGACTCCATCCTCTCTCTTGGTAACAGCCAGGAAG  
GAACTGAAAATGAAGCATATCATTTGGTTTCATTTGCATATTTCCAGAATT  
CAGAGTCACAGTTTGATTTGGGCTAATCTGATATTTTATGGCAAAATCAA  
AGACCTACCTTCAGGTGAAGTTTATAGAGCAGAAAAGAGGTTCACTGTGG  
GGTGTGTGTATGTTATGAAGATTCTTTTGGCCCTTAAAGTAAAATAGGATT  
CTAGTTTCCTAAATAGGAGATCATGTCCAAGTCATCAGATGGGGATGCCT  
GCTTCTAGTCAGGTATGATCCCAGGATCAGGCCCATGTCAGGCTCCC  
AGCCCAGCCAGGGAGTCTCCTCTCCCTCTGCCCCCTCCCTCTGCTCATGT  
GCACGCTCTCTCGCTCTTTTTTCAAATAAATAAAATCCAAAGAAAGAAAG  
AAGAAAGAAAGAAAGAAAGAAAGAAAGAAAGAAAGAAAGAAAGAAAGAA  
AAGGAAGGAAGGAAGAAAGAAAGAAAGAAAGAAAGAAAGGAAGGAAGAAAG  
AGACATCAGATCAAGCTAAGTGTTTTTGCAAAATACCCACATCAGAATT  
CTTACATAGTTTTCTAATTATTTCTCTCTGTATCTCCCTACTAGATTAT

ACACTCAAAGCCAATTTTGTGTTGTTGGTATCAGCAATATCTGTTTTTC  
TCCTGCCTTGTTTTAAAAAGATTTCAGGCCCTCTGAAGACTGATGTATTAC  
TCACATTGAGATATATTATCTTTTATTCTCTTAGGTGATTTTCAGGGGCAA  
AGACCAAGATCATGCAGATGCTGTAGGAGTTGGTGATATTGTAGTGAGTC  
AAAAAATAAAGTAGGAGAGAGATTAAACCAGGCAAAACCCTTATCGAGTC  
TTTTTTTTTGGCCTTTTTTACCTTTCTATTTCTGCCTTATCAAGCCAAT  
AGTCAGCATTCCTTGAGTAAGTGAATCAGCAAACAAGTAACAACATAAAAA  
TATACATATACAACAAAACCTGAACAAACATGCCTCTGGGTATAAAAGCTA  
TTCATATAAACTTAAACAAAATCTATGACAAAGAAATGTGAACATCTC  
TGTTACATGTTTTTGATCCAGAGGTCCCTGTTTCAGATACTGGGTCATTAA  
CACATCATAAAGAGATTATCCAGACAACATCAATTAACCTGGCACTGCAA  
GCAGCTGTATTGGTCTAATTGATAATTTGCATCAAGGGACTTCTTTATCT  
TTTAAAATTTCTCTTAGACAGGGAAGGTGCAGGGGTAGAAGGAGAGAGAA  
GCAAAACCCCTCTGAGCATGGAGCACAACCCAAGGCTCGATCCCGCAACCC  
TGAGATCATGACTTGAGTCAAAACCAAGAGCCAGATGCTCAACCAGCTGA  
GCCACCAGGTGCCCTCAAGTGACTTCTTTAAGAACCACAGTTTTTTTCAG  
GTATGAAATGGAGCACTTGTTCAGTTAAATGGAATGATCACAATCTAACA  
GAAAGTAATTATTCAATAAGTGTCAGCTCTTTTAACATCAGTTGAATTTT  
CTTTTACAGAACTTTGATTCAAAATTAAGTAAATAGAGAACCTTGCTG  
AACATATGTGTTTCTCCATTGACAAGAATTTCTTTGTCAACTGATAAAT  
CAAGCCGCAAGTATGTGACATTGGTGATTGTATTACTGATACTTTGTCTG  
AGTAAGAGGCACACCCTAGGCTTTGTACATATTCAAAAGAGTTTAAAAAT  
TCAGAAGTAATTATAAAGATACAAAATTTATACTAGCTTTTCCTCAACAG  
AAGAAAAGTGAGAAGAACGCCAAAAATTTAACAGTACAATAAACTACAGC  
ATACTTGGAGGGACTATAAAAAATAATGATGCTATTTGAAATTTTACTTAA  
AAGAAAGACATTTAAGTAATAAGTGAGAGATAACTATCCTAACGTGCCCA  
GAAATCCACTCTGCTTTTTTGGGAAGGATGTTTTTCATGTTCTTTTGAAC  
TCCTGGAAGAATTTCTCAATCCAATATCCTCAAAAATATCCATATATCCA  
TCAGACAGCACAGAAGTGTCAGAAATTCCTTACCCATGAGGCTGGACATA  
CATACAGCAACATGCATTTGATCAGGTTGAGAAATAGGTATCCTAAGAGG  
CTCTATTATTTATTTTTTTAAAAAAGATTTTATTTATTTATTCATGAGA  
GACACACAGAGAGAGGCAGAGACACAGGCAGAGGGAAAAGCAGGCTCCAT  
GCAGGGACCCCAATGCAGGACTCGATCCTGGGACTCTGGGATCATGCCCC  
GAGCGCCAAAGGCAGATGCCCAAACGGTGAGCCACCCAGGTTTCCCTAA  
GAGGTTCTGTTAGAAAGGTCTTTGCAAAGGATGAGCACACAGGATCTATA  
TTGGCACTGGAGCCCGAGGTAAGGCATGGCATTCCCAAAACACATTCATC  
CTGCACTCTCGTGATAAGGGTTTTGCCTGGCTTAATCTCTCTCCTCCTTT  
ATTTGTTGACTCGCTACAATACCACCAACTCCTACAGCATCTGCATGATC  
TTGGTCTCTGCCCCTGAAATCACCTAAGAGAATAAAAGAAAATATATCTC  
AATGTGAGTAAACATCAGTTTTTCAGAGGGCCTGAATCTGTTTAAACAA  
GGCAGAAGAAAAACAGATATTGCTGATACCAACAACAACAAAGCTCACTT  
AATATATTTGGTGAATCTCAAGAGAAGTGCTAACATTTTCTCTTTCTGA  
ATATGAATGCTTTCTGTTATTTCTAGAACTATGAGAATTTTAAAAAAA  
TCCAAAAACAGAACAAAATTTTATCACTGAGAATTTCTCTATTCTGAGT  
TTTCTCTCTCTCTCTCTCTTTTTTAGAAAAGTGAAAAATAAAAACAA  
TACGCAACAAACAAATGAAACTGTACAAAAGATGCTGGATTCTACAACAT  
CTACCGCTTGGTAGAGCCAGTTGGCAAAACAAGATAAAATACACGAGTGC  
CTGTTTACGGAAGTTACGGGCATTATGAAATGTAACGCTTGCTTTTAACA  
TAGAAAGCCAAGTGAAATAGGGTGAAAACCTAAGCAGATCATACTCATAT  
AATTAAAAACAAATGTATTTTCATGAAGACCCTGATTCCAGACGGCCGC  
CCTCACTGCTCTCCTCCCCCTTTATGGGAATCTCTGAAACCATTTCTGCT  
TGGGGGAGAAAGTAGATTTTAGCAGAGTGAGGAAGAATGCCAAACATCCA  
TGGCAACTTCGAATTTTTTCCACTTTCTTTACATGTTCAATTGAGACGTTT  
ATAAAATTATAAATGAAAGGACACATTATGAGCACTTTCTTTGAAGGGAA  
AAAAAGGTCTTGCTTGAAGTAAAATCTTGAGTCTGTAGCCTTCTTCT  
GCAGAGAACACTTGGGAGCTTTCTCTGCCAACAGCGGGACCCCTACAAGA  
GTTTGCCTTTGCCTTCAGGATTCAAGAAGGTGGAAGCAATTGTTCCCCG  
ACTGTGGGTGAGGCATGGAGCACCAGGAGGGGTTGCGAGCACCGGGCCT

GGGCTGGTGTCCCTCAGGGACTGAGGTCAGTATGTCTGGGCGCCTTCCTT  
CCACCTCCCTCCTCCCTCCTTTCTTCCCTCCCTGCCACCAGGGATTCCCT  
CCTGTTTACATTGGGGAGACTGCAACTTCTGTTTCTTAAACATTTAAAAG  
AAGTTTAAAAGCTTATAAAAAGGCTCTTAAGATTTCTTGGACACCGAATG  
CCTCTTACAGAACAATATTTTGAAGAGTTAAGTGTAATGAATCAGAAAC  
CGACGTATTAAATTTCCCTTGACATACACATCAGTTTAAAAAATTAATGG  
AAAAAGTGCCAGGGCTCAAAATGTTTGGGGTTTCTCAAACCCAAAATG  
CTTGAATGTAAAGAGTGGAATCCATTTGAACCAGTCAGGTTTGCTGATT  
TTCCACACCCCGCCCCACACCCCCAGAGCCCTAGTAATAAAGGAGGGAG  
CAGCAGGTCTGGTGGTGACTGGCTGGCTGGGGACATGTCACCTTCCTGG  
TCATCATGCTTTGGTTGGGGCAGAAGCCAACATCTGGGCTGATGCTGCAG  
AGATGTCGAGCCACTGTTTCATGGAGGCTGACGCTAAAAGCTGGTTTCAA  
AAAGAGACAAATAGAACTAAATAAACAATCACAGGAGATCATATATCACT  
GATGAAGATATTTAGATTTGAACCAGCCCCAGAAAACATAACGTGCTGCA  
ATTTGTCCTGCAGACATTAACTCAGTCCTGGGTCTGTAACCTGCAGACCT  
CATGACTTCTGATGGCAAAAAGGCACATGGGTCAAAAACCGGAGAACACTTA  
GAGTTTTGCCGTTTGGGTTCTTTTGTTCATTTGCTGGTTTCGATACTGAT  
TGTACATCCAAGGAAACATCCACAAGAGCAGAAATAACCAAAAGTCCTGA  
AACCAGCCTCAATACCTAAAGTCATCTTTCGTCAGACTATTCAAATAAT  
TTTTTCATTCCGTTGGTTTTGTGTTGTGAGTGAACGGCCACACTAGGTGG  
CAGCTAACAGGAAGGCTGAGCCAGGTGAAGAGGACACATGCTGTCCTCAT  
GGTCATGGAAGCAATCTGATCGCTTTGGTGGGGGGGGCGGTGTCACAAA  
GCCACCAGGAAGTCTGTGTTGGGCCACTTTAGCCCTGGAACTAATCATA  
AGCCCAGCAAGGGGGGATCATGGCTTTAAGCTCATGCCTGGCCGTATCTC  
ATGGTAACTCTCACTCCGTAAAAACACGTGAAAGGACCCGTGTAACCTCG  
AAGAGCTCTCTGCACATAGCTGCCTTTACTCTTATTTCAAATTGACATC  
CTTTACCCCTTGAGGAGCCTTGGCCATCCCAAGTAGTTCTACAGAAGCCT  
GTAATGACCTCTACTTCGGGAAGAATGGAAATACAGGAGGGGCTGTCTTC  
TGGTAGGTATGAGCCTTGCTCATCCTTCCTCAAAGAAGTTCTCTCAAAAC  
CTTGGCAGGCTCTTGGAGGTGGGGAGACAGTACTTAGAGAAATATACCT  
TTGGAAGACAGTGGCCCGCTTATTTCCACTCAACGTAGGTGCTGGGTAAT  
GTTGTTCAAGTGAGTGAGCGATGGGAGCAGAGGATAGTCCTCTCTTCCCA  
GCGAAGTCGCATCTACAATGGAAAGCTCCAAGAGTTACAGGAGTAACAGC  
TTCGGGGACGTAGCAGACACAAGAAGGCTCAGAAATATACGGAGGCTCAA  
GGACACCCAATCACAGTCTTATTTCCCTCTCCCGTAGATCTGGGGCATGGA  
GGAAGTGTGTCAGCAGGGAACAGGACAGACGTGAGAAATGGCCCATTCC  
AGCACATTCTCTACCCACCTTTCCCAGCTGTCCCACCACAAAGTGATTCT  
CTTGTCACCCTAAATGATTGAGAGCAAGTAATTTCCCCCAGGCTGGGCTT  
CTCCTGCTCCACCTGACAGTTCAAGATCAAGATGTGCTCCGCTGTCTCAG  
GTTTGCTGAGTGTGCTATTATTTGCTATTATTGCTAATATTTGGGTGTGC  
TAGGGTAGACGAAGGGGCTGGAAAAAAAAAACAAAAAAAAAAGGACGCAGT  
CACCAATGTTACCAGGTGATTGGTTACTTGATTATGTACAAGTGTGGAGG  
CCAGTAGTGATACCCCCACCCCATACCTAAAGTTCTAATGCTGCCT  
CTGGGCATTTTCCACATGCCTTCATCCTGTGTTTCAGGGGAACCCATTT  
TAACATGAGCCAAGACTACCCCTCCCTAGGGGGCATTCATGCGGGTG  
GAAAAACAAGCAGAATAAAACAAAAGAGGGATGCCTGGGTGGCTCAGTCTG  
TTTAACATCTGCCCTTCCGCTCAGGTGCTCAGGTGCTGATCTCTGGGTCT  
GGGATCGAGCCCGCATTTGGGCCCTGGCTCAGTAGCCACTCTGCTGCTCC  
TTCTCCCTCTGCCCTCCCCCTGCTCTGTCTCTCTCAAATAAGTCAAAAAG  
AAGGAGAAAAAGAATAAAACAAAAGCTCCACTTGAGGACCTGAAGATAAC  
CTGCTGGCCTCCTAGCTCTCAGCCAGCCCTGCGGTCTACCAGATGGATTG  
TGGCTGTATTTGTCTTGCACATTCAAAGGTACAGAGGGGGCCCTTGG  
GGGGCTCAGTCGGTTACGTGTCTGCCTTCAGCTCAGGTCTGGGATCGAA  
TCTTGCTCAGCTTCTTGCTCAGTGGGGAGCCTGCTTCTCCCTCTGCCTC  
TGCTTCTCCCCGCTTGTGCACTTGCTCTCTCTCTCACTCTCTCCAAT  
AAATAAATAAAATCTTTTTAAAAAAGTGGTGTGGGGGGGTAAAGGC  
CACCAAGATGAGGTCTAGAACTCAGCTGGTGTGTTTACTGACATCTTTTG  
GGATGGAGACACACCCTCCCCCCCCCCCCACTCCCTTGCCACCCCCAG

GCCGGGACCTGGTGCACAGACCAGATGCCCTTTCCCTTCACCATGGGGCC  
TATGGCTCCACGCCGCTCTTGGTGCTAAAGCAAACAGTTGGAGCCGATGT  
GCCTCCCGGCCTTGGTCTTGCTGCCGCCGATGGGCTGATGGGCAGGACAC  
CACTGCCAGGGCCTCGCTGCGGGTCAGAGCTGGTGTCTTGGGGCCACATG  
GCAGGGGTTCTTTCTTCTTCAGGTTTGATCCATCCTTCCTTCCGCCGCTC  
CCTGGCAGTCAACCACCGGGACAAGGAGGGAAGCAGGCAGGAGGGACAGC  
GGGAGACTTCCAGAAATCTCTTTCCTCCCCTGCCTTCCCAAGTTGCCCGG  
TGCTGACCCTGGAGACTTCCACCTGCCCCAGCCAGGGAGCTGGTTACTG  
GCCCAGAGCCCTCCCAGGCACCACCCCTGTGCTCGCTTCCTCCTCTTCCT  
GCCCCAGCCTCTACCCCCCAGCCTCCTGGGGCTTCACAGCCAAATTCCT  
CATCTCAGGAAGAACAAGATGGAGCTGCCTTTTAGTGAGCTTTCAACGCT  
TCGGTCTACATCTCCTCTCGCCCGCAAATGCACAAACTCAAGCAGTTGCT  
TTCTTGGTATCAATTGTGAATCTAGAAGCCTGAAGGTGGTTTCAAAGAG  
AGCACGTGACATATGCTTCTTTCTGCTAATAAATAATATTTGGGTGTGCT  
GGGGGGGGTAGTGTCTTTGAGTTATATTTTAAAACTGGTTTTAAAAAAT  
TTTTTTAAATGTGCAGTCTCTTCACCTTCCCCTGGAGTCCAATTGTGCAA  
ATCCTAAAGTTGCAGCTTCTGCGGTTGATTAATAGAGCAGGAGAGGAGAT  
CCACACACCCCCGCCCCCTGCTGCCTCTCTCCCCTCATCCACTCACCCAC  
CCTTCTGCTCTAAATTATGCTACGTTTCCTCTTTGCCACCCTCTGCAGG  
TTGCAAGCAAAGGCTGCTGGCCATCCTGGATTCTCAGGGACACACATACC  
CCTACCTGCATCCTGTGGCTGCGTGAGACCCCAAGCAAAGGCAGTGGTGT  
TCAAAAAACATTTGTATTTTGTTCCTTTTGTCTCTTTTATTGGAAGAAT  
CATTAGGGCTGGAAGGCAGGTGCACACTTGTGGCACTTGGGGTCTTTTAT  
GAGAGACTTACAGTGCTCGCGCTCTACATGGAATCAGCTCCCTCACTGCC  
AATTAGTTTCACTCTGTTTCAGGGTCACAGATCGTACCCCTAATCCTAGC  
CAGTTGTCTCACCAATGGGGCAAAAACGTATAGAGGGCCAACATAACCAC  
TGCTTCTGGTGGAGAAAAACAACCTCCAAGGGCATGTCCACACAAAGCAG  
ACCGTGGTTAGAGGCAGGCATAATTGCAGTCACTAAATTAGCAGGGATCT  
CTCAGCCAGGGGCTAATCTAAGCCAGACCTCATGTAATGTCAGGCCATGA  
GCACATCACAATTGCAATTAAAAAGAAAAGAGAAAAATCTCCCTCGCTTC  
CCAAATGTTTTATTTTTTAAACATGGCAGGTCCTTGGTAATGGTATGAGATA  
TTAAGGCATCTGGAACAAGCAAGAAAAGTAATTTGGGTAAACCATCTTTG  
AAAGGCTAAAGGATTTTAAACGCATCTCCGGGGTCAAGGCCCTTTGCAGG  
CTCCGTTTCTCTGTCTGACATCAGCCATGTCTGTCCCACTTGTCTGCTA  
CCTGTTGGTTCTACCTAAGATCTTCCATCATGCATGGTCCTCCCGTGTCT  
TCTGCTTCATCTGGACCTCCTGTTGCCTTCCCTTAGGTGGTTAACAGAGC  
CCTCCAAGTCCCCCTAACAGGCCACAGACCTTGACCCCTCCAAGTTGGAT  
CTCTTTTCTCTTTTTTAGGTCTCCTAATGTCCATCAGGACCTGCGCTTC  
TAGACTAAGCCCTAACACAGAGCCATTAACACTCATTTTCATATAAAGGC  
AAGAATCGAGTTTGGAAACCCCAACAAGTGTACTTTCTCAATGAGAAGG  
GTATTGAGGGAATTTTTTCTCCTGTGACGAACATGTACTACTTCTGCATT  
CAAAAAAATATATTTTTTAGTTCAATTTCAAATCCAATATACAAACATAC  
CAAAGTCTTCTCTTGACTTTTTTAAACTCTTTTAGCATCCCACAACCCTG  
GATTCAGTAGTGCAATTTGTCTTTGAATTTGCCTCTTAGGTTCTTAAAA  
TCAAAGTGGATATCAGAGACTTGTGTGTTTCTACAGGTCAAATCATATT  
ACAATGTTGCCAGGAATTCATTTGTATGGGTGAATGGGAGGCCTATCTTT  
CACAGTTTTCTTTTTTGGTAGGACTACTGCCTTGATAAAACGTGGGTCTT  
TTCTTGGCTGGGGGCCTCGTAACCCCTCCGGCCATTTTACAATGAATTTT  
TAAACCTCAGCCAAGCATTGGGCTCTATTGGAATTTACCTTTTTTAAAT  
TTTGAATAAGTAGTCTATCAGCAGGACCATGAACAACCTTTTGATCATAT  
ACAGAAACCCATTGTAATAGGATTTTTTTCTGTGTTAATTTTCATGATTTA  
ATAAGACACTTGGCACATAAATAAGACTCTCATAGACCAAGCATTTTTTA  
ACAATGAGAGGATTAAGATCAGCCTATCGGGGATATTAGGAAAAGTGTGCG  
TTTCTAGCTTTAGTAAACTCTTCCATCTGTTTAGAGGTAAATTCATTAT  
TCCTAACTAAAAACCCTCCTGAAATAGATGTGGTGAAAAATGTTCTGCC  
CTGTTATGAGACTTTTCAAACAAGCCTAAAATTGCTTAGAAACAAAAGGC  
AACAGGAAAAAGAAAGGACCATGTCTCCAGATAATGAGGTCCTGCCTTTG  
TGTTTTATCTGCAGAACAGCACAGTTTGAAAAGTCTGGATCCCATTTTCAT

TTGAACTGAACATAAATGTAGTGCCTGGAATTCTCCCAAATGAATAAATT  
CTTTGCCGATAATTTTTTAAGTGAAGAAAGATCAACAGGATAGGGGCATGA  
GGGAGGATTATAGGCTGCAGGGTGTGTGTGTGAGTGTGTGTGTGTGTG  
TGTGTGTGTGTGTGTTGCACTGAGCAGGACAATTGGGACAATTCTGGAC  
ATAATTATTCTCTTCTTTCTTTTCTTTTTCTTTTCTTTCTTCTTCTTCTT  
CTTTCTTTTGATCTGCTACGCTGAATTCTGCATTTGTTGGAAAACCCAG  
TAGATAGATTTATTTCTGTAAAAGACCCTTGCTGACTATTCACTCCTGT  
TAATTCCTGCTCGGTTTCCCTCTACCTTCCTGAGGACAGCAACACGACCA  
ACCTCCCTTCTTCCATCGGCTTCTGATCTTCTTTCTCTGTTTCTGTAGG  
CTGGTGTCTCTCTCCTGGATGGTGGCCAAAATGACGCCAATTTATGGCGG  
TTAAGAATACACCATGGACCATTTCTCTCTTTAATTTTCTCCTCATTTGGT  
GAGGTCTTGCTGAGCGCAGTCTGCAGCTTCTGTATTGAGGAAAGGGCAA  
AAGCCATAGGATCATCTCATTCACTCTTAGGACCAAGGTCACCAAAGGAA  
GAACTGAATAATTTGTTTACATAAATCTTTCCACCGATCCTTGAAAAGTC  
CTGCAGTGAACACAATTTTCTTTCGGTGTTAATGTTCTCATGAAGCTTCT  
TTGTTGGAAAAATGAAGGGGAGAAAAGAAACAGCTGTTGAGTCTCCTCCTT  
TTTGACCACTGGTAGAAAGGTAGAGAAAAAGAAAAAAATTAACAAAGAG  
AGGACACACGTCCCTCCTCCTTCTTCCCTCTCCCCATCCACAGGCAA  
ATCTAATAAAGATGATTAAATTACATGTCTTTCTCCCATTGAAATCCAC  
TGCACACTATTCAAATATTAGAATCAGGAAATAAGGCAGGACAAGGTCC  
CTCATGAAACCTTAGAAGGCAGCACAGGGGTCTGAGCTGGAGGTCTGCCT  
GGCTGGGCGGCTCTAATTAAGAAATCACCTGCTGAGCAGAACTTAATCT  
AAATAAAATATAAAAAGGAATTCAGTGAAAACCATTACCTCCTCCCCACA  
CACCTCACGTCCAGAACCTCCATCCCTCCGTCTGAGGGACTTTCCCTGCC  
AGGACTGGAGACTTCTCTTTTGCTCTGTGTGCCCCGGCACCGTCAAATAT  
AAAGAACCCCCCTCCTGAAGAGGAAGCTGGGTCTTGTGCCTGCCTCTTGCT  
GCTTGGCCAGACTTTCCCAGGGCCACAGGCAGGTTTAGTCAATGTTGTTT  
TGGTTTGGAGGGGAATAGGAGATGGGTTTGATCAAGGATTGATTAAAGAG  
TGGGACATCTGGCCAACTTCTCCAGCGTTACTATAGCCAACTGCCAACCC  
ACAGCCTCTCCGTAGGTGGCTGAGTTCTTCTGCCTATCCATCAGCTGCT  
TTTGATGGAGTGGCCACTTGAGAGCAAAGACCAAGGCTGTTTAACTTGGT  
TTTTTGGTTGGTATCTTTGTGTTAGTGAGTCCTTTTAACTGCACTGAGTC  
AGCCTCAGACCTCTGCATTATCCCTCCAATAGGTGACACCTGGTTAGCCT  
TATTTCCATCTACACTCCATAGAAACCTATTTTGTATTCTCACCGTTGGC  
TCCTAAAAGTGGATGATTCTCTCTTACACATCTGTGGCTCTGCATGGGCT  
GCCCCCATCATGTCTGCCCCAAACAGTGATTTCCTCAATAGTCGAAAACC  
TGTTGTAAGAACCAGATCCTCTCCCTAGAGGGGAAGGAATGCACATATGC  
ATATAAACACATGTTTGGAGAACAATTCAGGGGCACCTTAGCCCCCTGA  
GGAGTCCATGGTCACCAATTTAAGGATCCTTGAGAGAGACTGTCTTTCT  
CTCTTTTACCCCCTGACAGACACTCAAAGATTCTCTCCTTTGATCAAAC  
TGAGTTAGACTCTTCTGACTCTTCTTCTGACCAGGCCCCAACCTTGAGC  
TCTGTCTTGGATCATTACAGGCTAGTTTCAGCAGGAATCCTGCTGGATCA  
GTTTGTGCAAAAATCTCCCACCTTGATATCTGATCAAATTCCTCATCCTG  
TACCCTAGATATCTTATCACCATGGCTAGCTTTTAGCAAAAATCCTGTAG  
TGTTGCTTTGGCCAGAATCCTCCAGTCTTGGTATGTCTCCTACTAATT  
TTCCACCAAGGGACCCCCACCTTGCTCCTTGGCTGTAAACCTCTGTTGGC  
CCTTGTTGTATCCAGAGTTGGGTCCACTCTCTCTCTCTCGCTACAATATC  
TGCATTGCAGCAGTCTCTCTTGCTTAAAGTCTTCTCAACCATCTCTAAC  
AAGAGCCATGAGTAATTTCTTTTCTAAAACCTCCTATATCAGGAAAACCT  
TCACTTATCCTCAAGGAGACCTCCATGAAGCCTTTCATACCAACCCGGA  
AGCAGTTATGAACAGAAGCTGTGTGCTCACGGTGACCTGGTATGTACGT  
CTAGAATATCATATATCACAACAGTAATTATTTGTTTACGTGTCCATC  
TTTCTCTGGACTAGGAGTGGGCAAACCTTCTCTTCAAGGGCCAGACAGTA  
AATATTTTAGGCTTTGTGAATCATGTGGTCTCAACTCTGCAAAAGCAGTC  
TTACACAATATATCTATAAACAGGAGTGGTTTGTCCCAATAAAGCTTTAT  
AGGCACTGCAATTTGAATTTTACATACCATTTTTCATGTACCACGGAATATTA  
TTCTTCTGTTGTTTACTCTTTCAAACATTAAAAAAATGTATAAACCATTT  
TTATCTCATGAGCCACATAAAAAACAGATGAGGGGGGAGGCAAATTTGACC

CATGAGACATATTTTGCTGAACCCCTGTCTAGGCTACAGAGATGCCTTCA  
AAAGTAAACCTTATTTACTTATACTATAGATCCCCGTATCTAGTCTCTC  
CAAGGTAATTTATCTTTGAGTTTCACTATCTACCACTAATTGATACAAAA  
ATAAGTGAATAAGTAACTACTAAATGAGCAAATGATTAGGAAAATTTCC  
TTGAGACAAATATTGAATTGAGTAACCATAAATGTTTCTTTTAGTACCCT  
GGTGAGGTTCCATGTTTCTTCATGATTAGGGACATAACACCGTAAGTGCT  
TAGCTACCAAGGCTCCAGTCACAAATTCTGAAAGTCTAGGATTATTCCAC  
AAATCACTGGGGAGATGCCAAAACCTAGTGCAGTCCAGTGTAGTCAGAAA  
ACACCTCCTTTTATTTTATTTTCAAATTAATGTATCTATTTTAGAAAGA  
GAGAGAGAGCACACATGCATGAGTGGGGGTGGGGGGCGGAAAAGGGAGAG  
AGAATCTCAAGCAGACTCCCTGCTGAGCACAGAGCCCCACATGGGGCTTG  
ATCTTACAACCCTGAGATCATGACCTGAGCCAAAATCAAAAAGCTGGACGC  
TTAACCAGACTGAGCCACCCACGTGCCCCAGAAAATACTGCCTTTTAGAGA  
TAAGATTCCCTCCACCACTCCCTGCGTTAACAGGATCACAGCTTCTTTGA  
GCCTCTCTTGAGCAATCTCTTAACCTTTCTGTAGTAGGCAGCTTCTGGCA  
TAGCTTCCAGTGATCACCCCTGCTGGTATTACAGACCTCAGTGTAACTCCTCT  
CTTTTTGAGTGTGGGCTAAAGCTAACGACTCACTTCTAATCAACTGAATA  
CACAAAAAGGATGGGCTGTCGTTTCTAAAATTATTTTCCATAAGATGCTA  
ACTTTGTTTTTTGTTTTTTGTTTTTTGTTTTTTGTTTTTTGTTCTATTGCCT  
TCTCTGCTTGACATACTTTGGTGGCAAGCTGCTGTGTTGGAGAGGCCTATG  
TGGCATGGAACCTAAGGGTGGCCTTCAGCCCACAGCTGGTGAGAAATTCAG  
ACCCATAAGGACACATCAAGGAGCTGAATACCTTCCAACAACCTCCATGGG  
TGAGCTAAGAAATGAATCTTCTGGGACACCTGAGTGGCTTAGCAGTTCA  
GCACCTGCCTTCTGCCCAGGGCGTGATCCTGAGGTCCCTGCATGGAGCCT  
ACTTCTCCCTCTGCCTATGTCTCTGCCTCTCTCTCTGTGTCTCTCATG  
AATAAATAAATAAAATCTTAAAAAAAAGAAATGAATCTTTCATCTTACA  
AGGCCCTCAGATAGGACCACAGACCCTAAACCAATACTTTTCATTCTTACA  
AGAAAACTTGAAGCCAAGGATCCAGCTAAGCCATATCCATATCCATGATT  
TACAGGAATTGTGCAATGATAAGTTTGTGTTATCTCAAGCCACTAAGTTT  
TGGGGTAATTTATTAGGCAGTAAGAGAGATAACTCATACATCTACCTCTA  
TGATAATGGGATGCATTATTTATTCCTTTTCCCCACCAAAAATGCTAAGCT  
CCCCAGGGCGGGGTGCTAGTTACATCATACTCATCTTGGCCCATAATACAA  
ACTTACCAAATGTTTGCTAAATTGCCTTATATTTTGGGTTTCATGGAATT  
CAGTCGATTTAAACAACCATAGTAATTTTGAAATATATAACAGCAATAGG  
ACAAAGCAGAGTGCTGGTTATGGCAGAACTTTTGAAGTACAGAGGGG  
AAAAATATTTGGATTTGTACCCTTTGTACCAGGTATGGCTTAAAGAC  
TATCAGGGGTTTAAATTCATTTTCAAAAAGCGTTCAAAGTGGGTGCCT  
CCTAACTACACAAAAGAGATCTTTGCCCTCATTGACCTGGCCATACAACC  
TGTCCATTGGACAATTCCCTTGTTCCACATTTTCATGGCCAGTGAGAAAT  
ACTATGAAGTGAGAGGAAAAGATGGAAGTAGAGAGAACTGAGAAAAAGGT  
GGAAAAGTGGAAAAGAGGAAAGAAAAATGAGCAGAGAGAAGAGAAATGGT  
CAGAACACCCAAGCCAGAGGCAGAGAACCTATTCAAAAAGAAAAAGTCAAA  
TTTTCTTGTCTCTAGTCATAATAAATATTTTGACAAGGAGCTTGGCATT  
ATCAAAAAGGAAAAAAAAAAAAAGAAAAGCAGAAGTTGTCTTCCAAAGGAC  
CCAACACTCTCAGAATTCCATGACCTAATCCTGTGTGGTTGTAGCAGCAA  
GACAGCCTCTCTTGTCTAAGTGTTGTGGCACCGGGGCTCTGTTTCCTCA  
ACAGCACATGCCATGCCACTATCAGACTTAGGAGTAGAGCACTAGGGATG  
TGGGGGGACAGTCTGGATACCATGGCTGGAAATGCATTTTAAATCACT  
GCAGATTCTTATTCTCTATCTTACTGGTTGCTTATCATAGCAGTAAAGTC  
AACTTTTCATGACTTTTCGTAGACATTATATAATATGTTCTTCCCCTTGCT  
CCTATCTCCAGCTGTTAGCCAGTCTCATCCCAGAATGGGATGGGGTTGGG  
TCAACTAGAGCGGTAAACCTTTCATGCTGGCATGTGAGGGAGCCAATTCC  
CAGCCACTGAACAAACCTAAATTTTCTGCAGTTATCACAGGACCAATAGA  
TCTCAAAAAGAAACCTGAAAACGTTCAAAGGCCGAAACAAGTTGAGCTA  
CTTTAAGCCCAAATGTTCTTGTCTATAAAGCAGGGACAATAAGAGGGTTC  
ACAGGGTTACTCTGAAAATCAAAATATGTAAAAACCTCAGTCTGCTGCAA  
GGTTACTGAGCTCTTGGCATTTTGGGTGAGAAAATCTTTGTTGTGGGGC  
CCTCTCCTCTGCATTGTAGAATGTCTAGCAGCATCCAAGCCTCTACTGGC

TACATGACAGTAGTCCCCACCACATGCCACCCCCCTCTATCACAACAGT  
CAAATCACCCCTGGTTGAGAACTGCTATGCTAGTGCTTGGCATATAGTGA  
TTGTTCCAGAAATATTAGATGCTATTTTTATTATCATTAATAATTATTACC  
AACCACAGCATCAGCTGGCAAGGGTAACAACAGCTCCTCTCTCTCATTGT  
ATCCTTGAAATAGTTGCTGTTTTTCTTCCCCCTTCGAAAGAAAGAGCTGA  
GAAGAGGTAGAGCCATTAAGTTGGTAACAATCCAGTAGGAAACCTACCAT  
CAATCTCCTATGAAGTCTTTTTTCCCTGGAAGGAAAAAGGACCACCATCTT  
GTGCTCCAAC TAGGCAGATTCTTTAGCCTGACAGTTTGTGAGTCACTGCA  
GATTCTTTCACTGGCATAAATACGCCAACTGTAGGCACTACTGGTACAGT  
TGACTCTTGAAACAGCTCTTGGAAGTTTCCAAAAGTACCATAAGAAAGAG  
AGGAAAGAGATGTTCAAAGAGAACTGTCCAACAGAAGTTACTCCCTTTGC  
TGTTTTCTTGTGGTTTTTGTGCTTGTTTGGATTACAAAGTGTGTGTGTGTGT  
GTGTGTGTGTGTGTGTGTGTGTGCCCCAAATTGTTCTTGCAAATTCTAACAGT  
TTGCTTTTAGCTGTTTTTGATACCACGCTGTTTTGAAGGTACAAATGTTTAT  
CATGGCATGTCTTGTGTAAAGTGTACAACTGAGAGGTGAGTGTGGTGA  
CTGGATGGAGAGTAGTATTCCTCAAAGTTTTAAACCAATAGATGTTAATA  
GCACAGGAAAGTTGCAAAAAGATTTCTGGGGGTCTGGGAGTGGCCAGCTG  
AAAAAATGGAAATATGTTCCACCTCTTATATTTATGTTTAAAATTCATGC  
ACCCTTTACTTTCTATGCTAATTTTTTTCATTTGTTTCCAGGTAAAATTT  
GTAGACGGACTCTCAGTCTTGGGCCTTTATTTTCCGGCAGCTTTTCCTAT  
TCCCTTTTATAAAGCACGCACAGTGAAGTGCAAATGTAAGAACATGGTCT  
TGGAATCAGATGAGCTTACCCTCAAATTTGTTTTAATAATTGTAATTAAA  
AAAAAATCCTCAACCTCGCAAGTTGGATGTAAGATCTGAGTAGATCCTAC  
ATCCATTTCTTCCTCATTATTCTTCCCCTTCCTTACCACAGAGCTTCGCT  
TTCTGTCTTAAGTGAATCTTCCCCCACCCCGTTCCCACCACCCACCTCC  
ATGCTGACTTCCTCACCTCCCTCAACATTCTGACCAGACAGTTCCCCTTC  
CCAGAGCTCTGTCTATCCATCTTTCAACTTCTTCAAAAAGTGTCTTGAAT  
CTACACCACCCATGAGGGTTTCCAGGTTGAATTACATTCACAACAGCCAC  
TCATCTTGCACGTGTAGCATGCCTAGACAGTTGAAGACCTCAACACAGAG  
AAATCCTTCTTGAAAATATTTATTTCAACATCAACTTTACTTTTCCTCTTA  
TTTTGAATTTTTATTATTTATTTAATTTATTTGCGAGAGAGAGAACA  
GGAGCAGAGGGAGGGGCAGAGGGAGAGGGAGAAGCAGATTTCTGTGAG  
CAGGGAGCCCAACATGGGGCTCAATCCCAGGACCCCTGGCCCATGGCCTG  
AGCCAAAGGCTGATGCCTAACTGACTGAGCCACCCAGATGCCCCAATTTT  
TATGATATTTTTAAATCTAAGAGTGATTAGGAAAAGGGTGACATCTGTCT  
GCATCTAATGAGTATGCTTGCATTTTCCAAATAACAAATTCCTTGGCAAA  
TAGTAGACTCCATATTCATGTTTTACAACAAAATATAAACAAGAGCTAT  
TTACAGTCTCTCTTAGAACCTAATTATAAGCAACTTGAGGACAAGAAAC  
TTATCCATTTTCCACTTATGGTTGAACTCAGAGGTTTGGACATTTAAGAC  
CTTCAAAAATTTATGTTGAATGTAGCTAATAATAAATGCATTATACGTT  
TCTAGTTCATTTCTATGAGATTTAGTTGACCTAAATGTTTTGGCAAAAGC  
ACTTATTTATGATGCTTTGTGAGTATTGTGCTTGTACAACCTGTGTGTCA  
ACTCGTAGTTATTGGTTCATCCTAGGCACACTGAGTCCCCTTTGTTTACA  
CTTGACCTCAACCACATTCTTCAGTGCACCAAGCAGAGGGCTTTGCCCAT  
AGTAGGTAATTTAGAGATGTTATGGAATGAATGTCATATGTTGCATCATA  
CAAAGAACAGAAGCAAAAGAGTTTGGGGAAAAAGTAATCAGTAAAAATAT  
ATAAGAGCCATCTTGCCCCCAAAACATGCATAAGGTTAGATTAAATGTTT  
ATAGAAGGAGGGGAAACCATCTGATCAGGAGCGGTGGGTGAGTTTGGCTG  
TGCAAAATACCGCTGCCTGGTTGCACTTCCCAGGGTGCTGGGTTGATGTCT  
TCTGGAGTAAGAAGTACGCGTGATGTCTTTTCCAGGTACTTGTGCTTCA  
TTGACTCCTGGCTCCAGGCAGAGGGCAGGTCAGCCTATTATGAGGAGACT  
GTGCTTGCTGGGTTGTCAAGCACTGAATGAAAAATCATAACTGTGTTAAT  
AACGAGGGTGGCCACAGGCCAATGCCTCTGGACTTTTCACTTATAGATGC  
TATCAGAATTTTCAAATGAAGACCAGTGGACAGTCATCCAAATTGGAAG  
TGATAACAACAACCTGAGGGCACAGTATGCTGGTTGATAGAAGAAATAGTG  
GAACTGAGATCCAGTGGGGACCTAGTAATTGTTAGAACCTGAATTTGTG  
ACTTTGTCTAGACTTAGATACTGAGAGCTTTGAGTACTTTGCCACTGCTC  
ACTTCCAAC TAGGAAATTAGAAAGCAACACGTAGAGCTTATATAAATGCT

GGGCATTACCTTTTATAAGGAACAACAGGTCACATGGAGCATTGTTTCATA  
GACCCCCACCCCCCGGACCTATTTTAAATAGCCTCAAGTAATTATCTTGT  
GATATCTTGAAGTCCATTATGAGTCGGCTAAAAACAACACTTAATAGTCT  
CCCTCTTTTGACCAGTTAAGTATACACGTGATCCCCTACTCTCTAGAACC  
TATCCAGGTACAACAAGAAGACGATAGTGTTCAGTGAGGCATTTGATAC  
ACCCTTTGATACAGTCATGAGACTGTATCACCTGCATCTTAATAAACTC  
AGTTACGAATATGTGATAAATGACTGAAAAAATCTTCAAATGAATCTCTC  
AATCCAGGCATGACCAATTTTTTCCAGGAAGAGGGAAGCCGCAATTAGAT  
GGAAAAAAGCTCAAGGAAAAAATCCTCCCATTAGTGAGACTTAGTCTA  
ACAGGAGCTACAGCACAGGAGGTAGTCCAGGCTGACCTTGTCTGTGGCTG  
AGTCAAGACACTCAGCCTGGCATCCATAAAGTGGGTCCCATGGCACCTAC  
CGTACGGTGTTGTTGTAAAGGTCAAATGACATAATGTATGCAAATGACT  
CATCAAGTGCCTGGTATACAGTAAACATATAACAAATACTTGACCCATGG  
GAAAAATCCAACATCCGATCACACTCTCAACTTAAGACCCACATTTGGACT  
CAATTTCCACTATTGGCTCTGATAAAAACTGCTAACCAAGAAGGCCAAA  
CCTGCAGAAAGCCAATGGAACCTTTCAGCAAAGCCAACCTACCGCTCAGG  
GAAGATGATGAACTAAGTCTTTACCGCGCGAGTCTAAGCAATGCGGGGCA  
TGCTCCCCATAGGACTTTTAACCAACTGTGATTTGCCTCCTGCATTTTTC  
CACTACCCAAGTTGTTTCCCTTCCCTTATAATAACTGTCCACTTGGTAGCT  
TGTGGCCAGTGGGCTAAGAAACAGAAGGCGGTTGGTGTGAGCCTCTTGAG  
CTGCCAAGTGCAGATATTTTTCTCAGGTTTCTGGGTGGGTTTTTAAGCCA  
ACAGCCTTGAAAGGGAAGCAGAGCCAGCATGCCACAGGCATCTGGGACAC  
AAGGCCTACACAGTATTTTTGAAAAATCAGTATCGCTCACTGACGATAAA  
GGGGCATTCACTGTGGGCAAAGCCACTCCACAGGAGTGGGTGGAGTTGGG  
GCTACCAGGCAGGCCTCGGACTGAGTTAGCAGCCAATTTCTTTTTCCAC  
CATCTCTAGGGTTGAGTAGGTGCCAATACAGCTAAAAGCTTTTGAGACA  
CCCATAGGCACAGATAGTGAGCCCCCATTTCCCCCAACTCCCGTCTTT  
TCCATGGAACCTTAGCAGTAGCTACCAGGGGCGTCATCACAGAGCATTAAT  
TTTTTCCCTTGCCTGGTTTCCCACATTCTGTGACCACCTCAGAGTGTGCC  
AGGGAAAATACTGAGAGCCTAGGTAAACGAAGGGGAACCCAACATTCACC  
AGTCTGGCCTTAAAATAGCCAGCGGAACGCCCCCATCCCAGAGAGTACAC  
AGGCAGTGACTGTTTCGCTCGTGTGCTCAGAGCACCCGCCACCCACCCC  
ACCAGCCACCCCGATTCCCGTGAAAGCCTATCTCAGAGAGAGGATGAAGA  
AGTAGCCAGATTGCTTGGCTGTCTCGTTCCCTTCAGGCCCCGTGACTTGG  
GTGAATACTAATGAGCACACAGTGACCTGATGCAAACCAAGTGCACCCACT  
GGGCAGGGTGGAGACCTGGGTGGAACAGACGTCTGGGGTGGTGTAGGGTT  
GGGCAGAGCAACCAGGGAGAGCCAAGAGGAAGAGTGCTCCTGGAGGAAAG  
TGGAGGCCTTGGGAGCTGCAGGACACACCCCGGGGCTGCTGGCCAGCCTG  
GGACATAGCTCCACAACCTTGCCACCGTGTCAAAAGGCTGTGTACTCTGGA  
TGGAGCACCTATGGTGGGGAGGGGCCACCAAGAAGGGGTATAGAGTAAG  
AAAGGGAGAAGATACCATGGGGGAGGATAAGGGAGCGTGTACAGCAGAC  
GCAGCAGAAGCATCAGCTTTCTAATGTTTTCTAGATGCTCTCCGTGCAGT  
TGCCAGCTTGAGCAGAATGTCCGGTTAAGTTTGAGTTTAGATAAAACAAC  
AAGTAATTTTTAGTATAAATATGTTCCATGTAATGTTTGAGACATAATTA  
TACTAAAAAATATTTGGTGTTTATTTGGAATTCAAGTGTAAGTGGGCGTT  
CAGTATTTTATTGGCAACTCTAGCGCCCCCTCAACTAGAATGAAAACCGC  
CAAGGGCAGAGATCGTTTCTGCCATAACCTCTCTGCAAAACCTAACGTGG  
TCCGCTCCACGGGCTGCTTTGCTATGTAATGTTGTCCAGAAAAGCACACG  
CTGCCTTGGTACTTTCTGCCCCATCAGACTGACCTGACTTCACCTATTATT  
AGCCATGTGATCTTGGGCAAGTAACCTCAGCACTTTCCCCTATGTTCTCA  
TTTGCGAAATGGGAAAAATGTAATTGCCTGCCTTAGAGGGTTGTTGCAA  
GGGAATAATACAGGTAAAACCTTTTGTGTGTGCTGGCCTCTTAGAAAGGA  
CTCCATACATGTTAGCCATTATTATTGGATACTCAATAAATAAGGAAATG  
TGATAGAAAAAATTTTTCTGGTGTTAGAGACCCACCTGAGCTGAGCAT  
TGGGCTTCTTCAACCAGCTTTGTGAGGCTTCAGAGAGACTTTACCTTTCT  
GGATTCCTTTTCTGAAGGTTCCAAGACTCTTTCAAATTCTAAAATCCCA  
TAATTTAAATAGATTGAATGGGTGAGAACAGATGAAATAAGAGCCATGTC  
AATAGAAATGTTTAAGGGGGTTAGAGAGTAGAAGCATGATGGGGGATGTT

TCACTGGCCACATGAAAAGTCTGTCCCCAAATGCAAGACTGACCTTCCCA  
AGGCTCTAACCATAGGAGTCTGGGTTTCAGAGACTGAGGCAAAAGACAAC  
TTGTGCAAGAGCAGAGTATTCTGCCTCAATTCAGATTTACACCATAAGG  
ATACTAGTATGAGGCCAAGTGGGAGAGCCTTCCCAATCGGCAGCCAACCC  
AGTAATATTAAGTAAATTCATGTTAGCCCAGTGCCAACACATCAGAGAAA  
CCACGGCCCCCTACCATCCACAATACCTCTGTGGCCCAGAGTTAGTTTTCA  
GTGATTTGCAACATTTCCAGATAATTTCAAATCTTATTAGCGACCTTTAT  
AGCTATTTCTCACCACCTCTGGGAAATCATCCCTTAGTTTCAAAGAAAAT  
ATTTCTCAAAAAAAAAAAAAAAAAAGAAAGAAAAGAAAATATTTCTCCCTC  
TTATTAATTCTGAAGAGAGACCAATGATAGGAAGATATCTTCACACCAAT  
GGTTTTCCTTCCACCCGATTCTTTCCTGAAGAAGATGGAGGAGAAAAGAGT  
TTATTGGCAGCACTACTAACAACATGGACTCACAGCATGTTAGATTCAAG  
AGCCTTTGGAGAATGAGATAAAAGAGAAAATATAATATCCTGTCTAGAAT  
ATTCCAATACATCTGGGAGGCATAATCTTTGTTCAATATAGCAACGACTT  
CAGAGTCTGAGCATGGCAACATACAGGTGCAAAATATATAAGGCTGAGGG  
AGTGCGTTTTGTGCTGAAACGAAAAAGAATGAGCCAAATGGACATAACCAA  
GTTGTTAGCTTTTCATCGGGTATATGGTTAGTTGGGGAAGAAGATGAGAGT  
CTTCAAAGAATAAAGAATGTTCTATGCAAAGATAGGAGGCTTTCAGAGC  
ATGCCAGGAAATTGCCATGAGTAGGAGCCTAGTTAAGGAATAAAGCTGGA  
GACACAATGAAGTCTTCGGCATGTGGGCTGGGCTCTAGACTCATTAATT  
AGCTCACAGGCCATGTTGCACCTAGATAATTGGATCACCCATAGTTTTTT  
CCCTATTGCACTATGAATGAAGGAGCTCTGCCGAAGCATTGAATGGTCCA  
CCAGTTTAAAGAACGTTTCTCTACCAACTTGAAATTTTCATCCATGGAATC  
ATTTTGATGGGACGTTGCTGAGGGCACAGAACTCCTCCACTGTCTATGG  
AAGGCAGCATGGCAAAGCTCGAGAAGTTGCAAATCACATCCTCTTCAAGT  
AGTAACTCAACTTTGGGGAACGTATCCTGAAGATACACTTGAACATGTAC  
CCAAGTTTTTGTTCAGGATTGTTTACAAGACCAAAACATTTGAAGCAAC  
CTCAGTGCCCTTCACAAGGAGACTAGTTAAATCAGTCATGGTATCAATAC  
ATCCACAGAATAAATGCAAAATTAATAACCTATATGGAATTTCTCTAAAT  
ATCAAACATGGAGCCATATCTAAAACGCATTGTTTAAAAAAAAAAGGAAAG  
GCAAGGCACAGTGAAGCCTGTAAAGTATGCTGTCTATTTGATAAAAATT  
AAAGGGGCCCTCAAGGAGGTAGAACATAATTTCCCTCCCCCATTGAGTGTG  
GGATGCATAACCCCCCACACACAACCCATTGACTTTCTTTCAAAGAATA  
CAGTATGGAAGGAGGAGAAGCAACTTTACAGCAGAGATGCCTGGCAAACA  
CTACCTTACTCAGTAGATCAAGGGTCACATCACTAGCGATAAGTTACTTG  
AACGTCATGTACCCATGATACAATGAAAATGCACGTCGCCTCTTAGGTCA  
TCATCCGCCAAACACACAAGCCCTGGCTAAACATGAGGAAAACATCAGTC  
TGACTCAAATTGAGGGGCATCCTCCAAAATACTTGAGCAGCCCTCCCCC  
GCCAAAAAAAAATGTCAAGATCATCAAAGCAAAGGAAGTCTGAGAACTG  
TCACAAATAGAAGAGGCCAAGGAGACGTGACAATGGAATTTAAGGTAGTG  
TCCTGGATGAGATCCTGGAGCAGGCAAGCGACATGGGAGTGAACTAGTA  
AAATCTGATAAACTCCGAAATGTAGTTAATGATAATGTTCTTACCTGTGA  
CAAATGTACATAGTAAATAAGATGTTAACAAGAGAGGGACTGGCTGATG  
GTACAGATCGGAACTCAGTAGTATCTCTGCAACTTTTCTTTGAATTTAAA  
ACTTTTCTAACATGTAATATTCATTAAACACTTCACAAAGGTAGAGGTAA  
TATATTTGCTCCCATGTGCACAAAACATGTGTGGACAAAAACAGGCCATA  
AACTGACAATTTCAATTGGATTGAATCTCCAGTAACTCAGGAACCTGAGAG  
ATTTCACTATATGCACACATATACTTTGACTTAGAAGTCATGCCAACCTG  
CTGCCTCTTTTTAAGATTATAAAAATTTATATCTTTACAAAAATAAAACAGA  
ATTTTTCATCCAAGTTAAGTTTGTCTTCTAAAAGATAGATGCCTTCATTTT  
AAAATTCCTCTTTTTTGGATAATGCAGTAATCCAGTAGCCCCCAAACAATT  
TATGAACATGGATTATTTCTCATGGTGGTAAGTTGCATGGCCCCAAAGTA  
CAAGGCTCCAAGGAGAATTGATTCTGAGGACACAGGGGTTTTGAGGAAAAC  
GAGAACCTTGGGTAAATGGTCTAAATACAGGGTTATTGCCTAAGAAGATCC  
TGGGCACCCTACTGACAAAAGGAAGATCCTGGGCACTCTCACATGACACC  
AGAGAGATGGTGAGCAAAGGACAGATCAGACGCCCATGGGGACATCCATG  
TCACTTTGTGCCACAAAGACGGATTTTGCTGACAGACAAACATCTATGAGT  
GTTATCCTATATATTGGCAAATTGAATTTAAATAAAAATTTAAAAAAAAAG

AAAGAAAGAAAAGAAAAAGAAAGGAGAGAAAAGAAGAAAGAAAGAAAGAA  
GAAAGAAAGAAAGAAAGAAAGAAAGAAAGAAAGAAAGAAAGAAAGAAAGAA  
AAGAAAGAGAAAGAAAGAAAGAAAGAAAGAAACATATATGAGATTAGCTCTCCC  
CCTGCTTCCCAATTGACTGCATCCTACATCCTCTCAGTTCCGGAATAAGC  
CTTCTCTGCTTTTGGATTCTTACTCAAGAAAAATATTCTAAAAGGGGGA  
GGGGGTGGCCTCTGAGGGACACTCTAGGCCATTCAAGAGCTGACTCTGCA  
GTCATTCATTCTGTCTATGCCTTTGCTCTTCGGTTTCAGCCACCACCTG  
GCAAAAACCAATGGGAGGAGACAGTGAAGTGAATTCAGATTTGACCCCAT  
GAGAGAAAGCCAGGCTCTTCGGGTCAAGCCTGAAACCCGTCAGGATGAAC  
AGGTCACCTGAGCCACCTGGGGGCAAGGTGCCAGAAGACCTCCCAGCCGGA  
GAGGCAGGGAAACGGTTAATAACTCAAGGTGACACATTAAACCAGCAGAT  
CTGGGGGCTGAAATTTGGCTGATCTTGAAGTCAAGCAGAACTGTCGGAACC  
TGGGGAGGCGCTGTCACTTTTACTGTACTTTTCCACACGTATTTTTATTT  
ATTAATTTATTTTAAATTTGGAAATGTTTCATGGGGAGCTGGAACACGCAGG  
CTGGAGAACTCCCCAGGGTCTGAGAGGGACAAATCTGTGTCTCTGCTTGG  
ATCTCCATCCAGTTTCAGACCAGCAGCTCCCAAGGGCATCAGCCACCAGTG  
GCGGTTTCGGTGGCCTCCCGTGGCCAGTCCCAGCCCTCGGCCCCCACC GCC  
CGTCCCATGGACACATGCTAACCTCCTCTTCTTTTCACTGCCCTCTGGTG  
CCAGCGTGCAAGCTCCTGCCAAGTTACACGAACAGTGTGCTCCATCCACC  
AGCCATCGCAGGCTCCTTGTTACAAAACCCAGGAGTCGCTTAACAGGGAG  
CAGATGGAGAGAGACGCAGGATACCCCCAAAGTGGGCAGGAGGGGAACCC  
CGGGCTGAGAGGCAGAGTGGAATTAAAATGCTCTGCCCTCACCCAGTTG  
ATATGCTGGCGAGGACTCTGCTTTCCCAACGCCTCGCATGTGAGCAACCA  
ACTCGTGGAATTTACTAAACAGAAATGGCAGGCTGGGGTGTTGGAGGTG  
ATCCTGTGCTCCCTTCTGGGGGGGGGCGCAGGAAATTAGCACCCACGGTG  
ATGGATGTGCTGCAAAGTCAGCCTGCCCTCTGGATCCTACCACCCTTGAG  
ATTCTTGCTCTGACCTTCTGGGCCCTACGTATCTACCAAGTCCTTGCTTTC  
TCAATTATGGGAGAATTCTCATCACAACCTGAACATTGAAACAACATTTTC  
TGCATCAGAGGACACGTCCCCATCCTGGACCAATGCAGGAGATGAGTTTC  
ACTCCTCAGAGAGCTGACAACCTGACTTTAACATTGCAGATGGACGCATT  
GGCCACCCCCACCCCTTACACGCACATGTGTGCGCACACGCACGGTTCAT  
TCTGGGGGGATGTCTCCACTTAACACCTCCACTCTGAGTTTGAGTTAAAT  
ATCATCTGTTCTAAAGACAACAGAACAGTTTCAGCTGTGTGAAAAATGAG  
TAGGATGCAGCGTACACAGGCACGGAAATGCACACACACACACCCCTCCT  
CGCTTCTTTCCCTACCAGCAAGAATTGCACCTTGCTTCTGAGGTCCCCAA  
AGGGCACCGGATCTGATAATCCCCAAATAGCTACTGCTCAATTGGCTCAG  
CTAAAGTTTCCCTGCAATGTGGCCCAAGCAGTCGTGCTTGGGTCTCGGGC  
TCCTTCATGACAGCTTGGGGCTAATGCTGTGGGTTCATCCATGGCAGATCT  
TATGCACGCAGTGGAAGTTCCCTGACCTATTCCATGGAATAGTCCAGAAA  
CACAAGTCCCCCATTGTTCCCTGACTTGGGGATGGAGGGAAGGGGGAACA  
TGCACACACACAAAACCTCCCTCTAAAAGATTAGTGCAATTATTAGCCAA  
CAGTAATGGCTATAAGCCAATCTGTTCTCAAATCCTCCCAAGCACCAAGT  
CACCTCAGAGCCTCTTAAAGCCCCAAACACAAGACTGTGTGTTCTCCTGC  
ATTTTGCCGCGTTGTTCTTGAAGGCTGCTGGGCCATTGCTTAATGCTGCC  
CTTACCCACAAGGCTAATAAGCAGAGAAAGAAACAGTGAATAATGCACAT  
GTCTGAGCCCTGGGTCCCCATGCCCCCATAAGTCTGTGAAGGCAGATGTC  
CAGGGCCAGACATATTGGCAACGGCTTCACCCAACATTGTGCTTATTAG  
AACACAGCTGTAGATTGTGACTTGCGGTTAGTGTTCTTTGTAGAACTCTC  
CAGAATGATGTGCTCTCTCCCTCTTTACCTTATGTGAATAACAATATTT  
GACCCCTGTACCATATCTCTGGCCGCTCTAGTCTCCCACCTGGAGTAA  
TGAGTATATATTGGGAAAGGAAATTAAATTCTGTTTGAGGACTTGGTGTA  
CAGTACTTACACTGCATACATATTTTAAACTCTCATCTGAGAGAAAGGG  
AGCTCTTGCTAGCCATATTGACATCTATATGATATATAGCAATAAAA  
TCCATAATATGTCTTTTTTTTTCTTTTTTTAAATATTTTATTTATTTGTTT  
ATGAGAGACACAGAGAGAGAGGGAGAGACATAAGCAGAGGGAGAAGCAGG  
ATCCGTGTGGGGAGCCGATTTCAGGACTCGATCCTAGGACGCCAAGACCA  
CGACCTGAGCTGAAGGCAGACGCTCAACCACTGAGCCACCTGGGTGCCCC  
AAATCCATAATATATCTTGAATAAATATGGATAATGATGAGAGCTATACA

AAGAAGAAAATTCTAAGGACAGGAAGGTTGGTGACATATTTACCTAACAC  
CAAAGCAATTGAGGGATTGCATTTAAGTTACAGATACGGTAAATGAGACA  
CCAAGAAAAGAATATGTTGGCTGAGTTCAAAGACAGCTGGTCCAATGACT  
CTGAATATTCTACTCAAGAGAGTACTTATGTGTGTAAATAAATACAGAGG  
TGAACACTCATCGCCGGCCGCCAGACACTATCCAATCATTCCTTTATTC  
TTCAAGAGATTACTGAACCCCTGCTATGTTCCAGGCACCGGTGAAGGCCA  
GGCATTTTGTGGGGTTCTCTTAGAGCAGCCTTATTCAAAGCCCTGTTGCA  
TCCCAGAAAACAGTGCCATTTGGAAAACACAGGTACAGACAAAAAAGTC  
TCAACGCTGAGCAAACAAAGAGGAAATTTTCTATGTGATGACAAATTGGG  
AAAGCTTTCAAGCATCTATTATTCATTATAGAGCAGACCAAGACATGTTA  
AACTTTGGGCATGTCTATGAAATACATAAAAGAGGTATTACATATAACCC  
CGTTCCCTACGAATTAACACCACGTCTTTGCCCCAGAACGCTCTCGGGGAA  
AAAAAACTCTGTTGAAAGATCTAGAGCCTGAGTCTAAATAACCAAGTTAC  
AACGACTCAATATTTTCCCCAATGACTATTTTCATAGTTCTGTACACACAC  
CTAAATGGAACCAGCACTACACCAGTGTGTTGTATACAACCTCCATAGTGT  
ATGTTTTTCACGCATACATGAACACACACACACACACACACACAGAA  
GCAGCGTCTTTCTTATCTGGGAGGTTTCAGGTTTTCATTAAATTCAGAA  
ATCCTCCCTTTGTAATAATTGGAAGATAAGCCCCGCTGAATCATTTTCAA  
AGCTGAGTCCCAAAATGGGGACTAAAAATAAATAGTAATATATAATAATA  
ATAAAATATAATAAAAAGTAAATAAAATTAATAATAACAATAAGTGGGCC  
GTTTGGGAAGTATCCAAAATCCTGAGCCAAAGGGCACCTGGGTGGCTTAG  
TTGGTTAAGCATCTGCCTTCGGCTCAGGTCATGATCCCAGGGTCTCGGA  
TTGAGCCCGGCATCAGTCTCCCTGCTCAGTGGGGAGCCTCTTCTCCTTCT  
CAGTCTGCTCCTCCCTCTGTGTTCTTTCTCTCTATATAGCAAATAATGAA  
TAAAAATTCTTTAAAATAAAATAAACCTTTAAAAAAATCCTGAGCCTAAAC  
ATATTGTATAACCTGACTAATCTTATAAGCTGCATATACTGAACCACTCT  
TTGGCATTACTCACTAATGAGAAGATCGAAGCGAGTGCATAGATGTTAGG  
ATGATTTTCCCTTTAGGATGCATAGATCTAAGTCCCTGATGTAATCACGC  
TGTCTGTATGCACTACAGGCATTTTCGTGGCTTCGTAAAGCAGGTCTTTG  
AAGGATGCACGTACAGTCAGTTGTGCTCGTCCGCACACCAACACACGCA  
CGCACCCTTCAATCTCATATTCCTGTCTCTGCAAAATGAAATAGTTTC  
ATTTGGGTCGATTACGAGGTATATTCTCAGTAATGGTGCTTGTGATCCA  
GGAAAAGAAGAACAGATAGCAGCGCAAAGAATAGCAGAGCCCCCAAACCC  
TGGGGTACCCCTTTTACCTTCAGTGACTCGTCTGCTCAGGGGGCCAGCC  
TATAGGAGCCCAGCTCACCAGCACCTGCGTGTGGATGAACCTTTCTAGAAG  
GAGCTCTGGGTACCAACTCACTGGAAGAAACCAGATCCACAGCTGGTGCC  
CACTGTTCACTCACCTAAGCTTCTTGTCTTTGAAACCAGACAGGGCCAC  
AGGTCCCTTGTGCATTTATGGTGAATCTTGCAAATGGAAAGCACAGGGGA  
ATTACAGAGAAGCTGAAAGCCGAAGGCAGAGGCCCGGCCAGGAGTGAGAA  
GACTAATGGCAAGAAAGCTTGCTGTCTGGGAGAAAGAACCCCTCACACTTC  
TCTTCATCCACCCATGGTTGACTGTCCTCCCAAACCAGATGAGCCCACCC  
AGCTCATTGCTACACGTGGCTACAATCCCTGCGGAGTCTGGCCTGCCTCT  
CACACAGCAGGTGGCCAGAGAGGGGTCTGCTGGGGGATTGCCCCACTAGG  
ACCTAACCCGTGACAAAAAAGAGGAAAAAAGTAAGAGTCACAACGAAT  
CACCCCTCGAAGTTGAGGGCGGGGAGTCAGATTCAACTGAACAACAGCTT  
TTCAACCCAGGCAGCTACTCACCTGGATCGGGCATGAGGATTGACAAAGA  
AAGTCAGGTCCGAATCCAAAAATCCAAAAGGAGCAAATCCAAGGGTCTCT  
ACCCCTGCCATCTTGTCTCTTGTCCCTCGGGCGTCAGGTGTGGGTTAGCGG  
ACCCAGGCCGTGGCCCTGATGAATTCAGCAAGGTTCCAGGATGGGTGAAG  
GGGGTCTAGCCTCATCCCACCACCTCCCTCGGTCTGCCCCAGCTTTTG  
GTGCCGCAAGCACTAGCAGCGGAGCGCAGGAGGCTTGCTCCTGACATTGA  
ATGAGCCACAGAACACGTCAATCTGATCTTTTATAGTGCTTTGTTTATTA  
CCTGTGTGCCCTTTATTTTCATAAGGGAACCGAGAAAGAGAGAGAGAGAG  
AGAGAGAGAGGGCGAGGGAGAGGAGAGAGAGAGAGAGAGAGAGAGGAGG  
GAAGATGACTATTAGTAGCAATCCAAAGACAGCTTTTCTTAAGCTTCATT  
CATACCAGCAAAGGTGACCAACAACCTAGCGATTGTTCTCTCGAATGTC  
ACCTTTAAGCACGGGCCGCTGGCCGATAAACTCGGCTCTCTCGTTTTT  
TGCTCTCGGGTGCCCTCCTAAAAGAAAAAATTTGCTGTGTTATC

CTCCAAATATCTCCAGAGAAATCAAACCAACAAGGAAATCTTTTCTTCTT  
CCCTCAACCAGCACCACCGCCACCCCCCCCCCCCCCAACTCGTTTTTTCTT  
TCTTCTTCACGCAGCTTGAACAATTTGGCTCTGTTCTGGGTGCATTCTTG  
CGGCCCATTTCTTTTTTTCAGTTCTATGCAGGGCTGGGGACGGTGGCCCAGGA  
GAACACAGGCCACATTTCAGACCCAGGACGGCCCTTGGTGGGGTGGGGGG  
GCCAGGGGGCCGGGGAGTGAACCAATGTACCTATGATTGTTGCGCCACCA  
ACTTAATACCTGAGCAGGGAGACAAAGGCTCTTTAGAAAAAGCCCAGGCT  
GCTGGGGAACCCATCCCCCTCCCCCCCCCCCCCACCTGAGAGGAGTTCAA  
AAGATAACAGAAGCTGGAAATAAAGCAGTGACATGATTAAAGTTTCCACC  
CCATTCTGGGAGCTATTGCAACAATGACAGAGAATGCACTGCTAGCCTT  
TACCCACGAACGGGCTCTGCTCATACATGGAGAATTTTTTTCTCTTCGTG  
TGTGTGTGTGGGGGGGGTGGATGTGGGTGTGTGGGGGGGTGAGTGTATGT  
GTGCATACACACACAGGCATCCAGTCCCAGACAACACACGATCAATAATC  
TCAGAGCCCTGCCACCTTGTTCACACAAGCAGAGGTAGAGCCACTGCTTGG  
AAAGCCCCGTGATTTGAAGGGAATCTACAAAATGAGGAAAACCTTTTCGACA  
TGAACCCATATTTTGTTCCTTAACAAAGGGTAAGTGGGCATTTTCAAGTTTT  
TACTTCTGTATTGATTTCTGCTCGGGATCTCAAAATTTGCACTTGCCCAT  
GGAAGAGGGTGGAGGCCTTGCAAATAAGTTCTGATGGTACAGGGAGTGTG  
TGTGTGTGTGTGTGTGTGTGTGTGGTGGGGGTGTGGACTTCACTGCGC  
TCTAAACAAATCACAGGTGTTTAGAGGACCTCTCTTCTAAATGGGGTGGG  
TGGCAGGCCAGTTATATGACTTCAGACTTAGGGATGGCCTCCCGGTGGCC  
CCGAGCTCCATGATCCTGGGTCAAGGTCCTTCATTAAGAGGAAGAATTTT  
TAGCCAGAAAATGCACTGAGAGAAATGAGAGAAATGAGAGAAATGAGAG  
AAAGGGCCAGGCCTAGAAGGTAACCAGGAAAGAAAGGTGAGACAACATG  
CACTTGGACCAAACAGGATTTGTCTGTCTTGTTCATCAAAACCCCAACCCT  
CACTTGGAAAATCTCAATCACAGCTTTACTTTTCTGGTTCTCAAAGAGA  
CTGTAAGCTCCATGAGAACCAGGCTGTACCCCAAGGCCTAAATCCCAGCA  
TCGAACACATATAGGTACTGAATAACTCTTTTCGAACGTTGAAAAATCGC  
AGATTCACAAGGGATAAAAAGAAAACAAACATGCGGTGGTATGCTGGAGCC  
GGCTCATGCCCCTCACAGGGGCTGATTGTTCCATTTACAAGAGTTTTGT  
GAGCCAGTTATTAAACACAGCCACTATTAAAAGTGAAATTTCTATAAACTT  
ACAATTAAATAAATTATATTTAAAAACCAAGCTAAATAAGCTATCACTTG  
CTCACTATTTAACAAAGTCTCACTATTATCTATGGTCTTGAGGTTATTTA  
CGTCTGTTGCGTCTATAGGGTGGAATACCGTGGGATGCTGGCCACTGCC  
CATTTCTTTTCTACTCTGTGTTCCGTGATGTCACATTTGTAGCTTGAAAC  
TGGCCATGGTGGCAACATTAACACCATGGAAATCTAAAAGCGCTACCAAT  
CAGGATTTGATTTACGGTTTTGTAAATTGTCTAGACTGGAGAGTGATGAAG  
AAAATATTTACACATTAAAGTCTATCGCATCCATAGAGGTTACATTGTG  
AGGAATAGAGAGAGAGAGAGAGACGCACACACACACACTTATGAAATATT  
CTTTCAGTATTCAAACTATTCTCTGATTTCGGGGAAAAAATCACCTATAC  
CATCGACTAAGAATGAAGCCCCCAAATGTCTTCATTCCTTCATCTTAT  
TCCTTAACAAAAATGAAAAATCAAGCAGCATTTCATGATGGAAGAGTATA  
GGCTGTTTCGTCAACAGCGAGAAGAAAAGCCGGTGGTATGTTTTTCAAGA  
ATCAATGAACATATATGGAATTTGCCGTACATGGTTTTCCGTATTTTATGA  
TTATTTTCAAATCGTGTGCAACACATCCTTTATGTGAGAAAGATTTCCTCA  
TCTCCTCGTGTACCTACAAACACAAGCACATTTTCTTCAGAGAGCTGGTT  
GTTAAACATTTACCAACACACCGCTGTCCCATAGCGTAACCTGCCTGTAAG  
GAAAGGGGGTAATTTGAATGATTTATAGGATGACAATGTTACATAGACGT  
ATAGGCATACGTGCACAAGGGTACATGTAACACGTATATGTGTTTGGTTC  
ATTGCATGGCTTTGGCTTAATAGAGGTAGGTCACAAAACACTGAAAGAAG  
ACTATTGGTAGAAAGATGATGCCGTATGAACATTTCTTTTATTTTTTTT  
AAGATTTTATTTATTTATTTATGATGAGAGACACAGAGAAAAGAGAGGCAGAGA  
CACAGGCAGAGGGAGAAGCAGGCTCCATGCAGGGAGCCCGATGTGGGACT  
CGATCCCAGCACTCCAGGATCGCACCCCTGAGCCAAAGGCAGACGCTCAAC  
CGCTGAGCCACCCAGTCGTCCCAGTATGAGCTATTCTTATCTTCCCTACT  
CTTTATTTCAGAGCTGCCGAGAATAAGGCTCTTCAAAGAACAGGCAACGGA  
GGCAAGAGTCACTCTTAAATTTCTGTACATCTGGATAGTATTTTACAGT  
TTCCAAAAGGACTTTTGCACAAAGTCCATCACAAGAGCTTCATGAGGGCT

CTGTGATAAAAGCAAGACAGAGCAATCCCATTTTACAGAAGAACATATTG  
AGGCTTGTAAGCTTCTTTACTTTACCAAAGTCCTCACACAACTGAGGGT  
GACTAACATAAAGGTGGAACACAGATCTTCTGACTCCTAGCCCAGTGTTT  
CTCAAGAGGGGATCAAAATAACCCACTTTGGAGCCGAGCTTCTGGAAAGT  
CCCATCCTTTTTTAGACCTGAGTGTAGGCAAGGAGGCGACGCAGTGGGAAG  
AGAAGGCACCTGGGAAGGTCCCTATAGCCAAGCTCAATCACGCTTCCTGAC  
TCCTTGGGCATGGAACCTATGATGTCAGAGCCCTGGTTTTGATCTGTCAG  
CTGGCTTGGGTCATGCGTAGCCTCTCCAGGTGAGCATCCACCCTGCCAGA  
GAATCAAACCTCAGTGGACTAATAGCTATAGCACAGTCCAGGCCCACAGGC  
CCCACTGATTTGTATGCTGGTTTTCCCTTTTTTTTTTTTTTTTAGACAAG  
TCAAACCCTTTTAATTTCTTCAAGCAAAATCCTATATGAAACAGCAAAAT  
ATAGTTCAGACTGAAAAGCAATTTCTGCGGTTGAATGGAGATAGTGAGAG  
GGGGGTGGCCAGCTATAGTTACAACTCCTGTCTGCTCCTGGGGACCCTTA  
CAGCACCACCAAAGAACCCTTGTCTCCTTGAAGCATCTAAAGAAAAATCC  
ACATTAGCATCTAATGTTGATGAAGGCAGTGTGTGTGCATGTGTGTGCAT  
GTGTGTCTGTGTATGTGTGTCTATCTGTGTGCCTGTGTGTGTGTGTGTGT  
GTGTGTGTGTATACTAGAGGGCAGAGGGCCCCAGCTTCTATATTGTGGGT  
CTCCTCCTTAAGCTTGGGTAAATACCCCCGGAATTTTCTGCCATTGGCCA  
CAAAAAGGCAGAAGGAGAGAGCGGAGCCCCCTCAGTGAACCGGACGGACAA  
AAATAAAGTTTCAATCCTATATCGTACCGTAGAAAAGCAAGCAGGCAAAT  
CCAGAAATGTTTCATCATCCCTTTGACATGGGTACCTTCATCATCACGAC  
TTTGTAGATGGAGAAAGTCACGCTTACAGAGGTTAAGTAACATTCCCAAG  
CTTTTACGGCTTACAAAGGGGTGAAGCGGAGAGCAGGGCTGGCTTCCCGG  
GTGGGCAACCAGTGCAATCATCCGGGGGGATTCTAAGGGCCCTTGCTCGG  
AGTGTAATGTCCTACAGGCGCTTGTTTTAAAGTTCTTAATAATTCTATCT  
TTGAATTTGTGTTCCGTAAGTAAAGTCAGATGGAGCGCGTGTAGGGGCTT  
GCTCACATATGGTCCTGTCTTGGGATGGGTCTTGTGCCACCTGCTTCCCA  
TCCTTGATGCTCTGGGTCTGCCTGTCTTCCCCCTTGCCACCCCTCTCCCT  
GACCACTGCCCACCACCTAGAGCAGCAGGTAGACAAGGAAAACCTTGTGTT  
CGGTCATCAACTTTTGCAACCGTGGCACGTGCACAGAGAGACTAGGTCAA  
GTGCATGCCCTGTATTTCTCCAGCAAGGAAGGCCGTCATTCCCATCTGGG  
GGGCAGAGGGGGGCTCTCACACAGCCCAATCCAGATTCCCAGCAGGTGC  
CAGAAATGGAGGTCGTGGTCTCATTAAGCCCCATGCATCGTGTAAGTGA  
CCTGGCTCAGGTTCAAACCCAGATACCTCAATCAAGAGATGGAGCTGTTG  
ACCCCTGTGCAGAATGCCCCCTTCTGTCCATGAGGGTCAGCACACTTTT  
ATTTTTCCCCGGGCCATTTCAGCCAGCCTCTTGCTCCAGCATGGACAGACT  
CGCCTCCGCCAGCATTTCTTGCAACAAGAAGAGGGAGTGCGTGCAGCCAG  
GAACCACGAGTGCCCCGTTTGCCCTACGCTCACCCCTTCTCCCACATATG  
CCCACACGTGTTCTCTTCAGGTTCCACTGACAGCAGCTCTAGCAGTGCTG  
ATGAGCATAAAGTTTCCCCCAGAGGATAAAGGGCAAGGCTCCCCGGGCTC  
GTGAAGCAGCCTGCAATGGTGGAAGGTAGTCCAGTGAAAGACAATGCGCG  
GGCAAGGAGCCAAGAGCAGTTCTTGAGGTCCCCCCCCGGGACCCGGCTT  
CCAGGAATCAGGAGAGGCAGTTCTGTGTTTTCTTGGGATGACCAGTATGT  
GAATTCCCAAAAGGGCAGGAATTCTGACTGCTGTGCAGACAGCGATGCTT  
ACGACATACTCAGGGCACTGGTGCTGTTGGAGGGGCCACTCCACATGCA  
AATGTCATATTTCTTAACTCTGTCGCTGGCATTGTGTATCATCTGCAGCAC  
TAGATTTCTTTCTTTCTTTCTTTCTTTCTTTCTTTCTTTTTTTTTTTTTT  
TTTTTGAGGTGAGGAGTGAGGAAGAAAACCCCATCCTCTCTTTCTGGTCC  
CTTCCCTTCTTCCCCCTTACATCCGTCTATGCAGCAACCAATAGCGAACAG  
GCCAGGACCCCTTGCTCCTGAACAAAGCCAAACAGGTGTGAGAGATTAG  
CTCCCTGGACGAAACCTCTGTCCAACAAAACAATGTCAAATTCCCCCTA  
ATAAAGTCCAGAGCTGTAAGCAATTCCCCCTTGTTATTAAGCGGGAAAGA  
AAACACAGCCTGACTCCTTCCCAATTAGTTCGGAGGACCCTCCGATGAGC  
CGAATTTAAACCAGAGACCTGCCATGATCTGGCTTCCAGTGCAGACAGGG  
CCTGCCTTCCCCAACGGATGGAAACTCACTGGCCCAGCTTCCAGTCATC  
TTGGCACGAGGGCGCAGACGGCCCCAAGCCCCCAGTATCCATGGG  
CTGTCTCTGCCTCTGATTCAAACCATCTTTGCGACTCCCTGCCAGATCCC  
TTACTTCGACTTTCCATATGGAGGCTTGGTCTCCTTTGCCAGGTTAGTGT

TTATAGGGATGGGCTTTTTGACAGTTTCGCTGTCAGTGAGAGAGGGGATG  
GGATCCCTCCCCTGGACGTGAATCACTTTCTTGTCATCCAAAAGAGGGTA  
GAAAGAAAGACCAACATCCTGAAGCAATAACAACACACTGGAAACCCCAA  
AGGGATCTAGCAATGAGGAAGTCTTGTCTCTCCCTCCGCCCCCTCCTCAA  
ACTGATAGGTCTGGGGTAGGAAACAGAAAGCCTCCAAGGTGCTTCCCAA  
ATGGGCCCAGCTCTGTTGCTTTGTGTTTACACGCGGCGTTAGAGCAACTC  
AGACCACTCGAGTCATCCGATCCACTCCCCCACCCTGTCTCAGACAGCGG  
TTGGAAGAAGTCGCTCCCAATCTTGAACATCTACCTGAATAGGGGATGTT  
TAGACAGTCCTCATAGTAAGCCCTCGGGAAAGATTACAATTGCCAGGCAC  
TGTCCTAAGGCTGTAAAGCATTACTTCTCAGAACTCTATAAATTTTATAA  
ATGAGGTTAACAGTTTTTTAAAAAGTTACTTGTCCAGAACTCAACTTAG  
CCACCAGTAGAACCAACGTTTGAACCCAGAGTCTGAATCCACATCTGTGG  
TAGACTTTTTTTGTGCTGTTTGCCTAAGAACTCCCCCCCCACCCCTACTTCCC  
ACCCCCCCCCCTCCGCTCCCACCCCCACCACTCCTCCCGACCACCCCCACC  
CCAGCCCTCTCCAAGCAGCTCCATGTTGGGATTACATTTCTGGGAGCCT  
CAGGACCAGCTCTGGCCAAAAGAGTTGTGAACAAAAGTCATGTTTCTCACT  
CTCAGGGCTGGGCCAACGTGTGTCTCCCCAGAAGGCACTGTTCCCTCTGC  
TGTGCTTACTGGCAATGTTCTGGAGAGTTCTGTCAATGTGGGTCCCAGAA  
TATGGATACAATGACAAGGGAGCAACGCTCTCAGCTTCTGGCAATAGATA  
TGTAGCATGAGTAAACAATAAACTCTAATTGTTTTTCACCCATTACGATTT  
GGGGCTTTTTTACAGAAAGGTGAAGAAGATGGTTAGTTTGGGAGGGAGCCA  
AGGGACAGGGCATCTGAGCTCCGTTTCCAACTTGAGTACCTGTTACAAG  
GGTGTTAGCCTTATAATAAGGCGATAAATACTGTTTCTCGGGGGTTGCAT  
TATCTGTGTTTTATTTTACACAAAAGGGTTAAAAAATATCTGGGGGCTG  
TTTGTTACCACCCATGCCACCTGACTGATAGAAAACAGCCAGCGCTGAT  
CGATACACCATCATGACCCCGGTCATGAAGTGCTTTCTTGAGTCTCAGTG  
ATCCCCCTTCTGCTCAGACGTCAAGAAATTTCTATCTTCTGAGCTGAGAA  
CTGAAACTTTTGTGTGTGTGTGTATAAATCTAAGTCTACTCATGAGAAGG  
GCAAGAAGAAACATGAAGGAGAACATGAAATGCATTACCTGGGCCAGAA  
AGTCTTCCAAGGGTCGTATCCAGAATTTCTTAGGAATTGCCAAGAGCC  
AAGACATGGCTAACTCTGAAGTCAGGCATCTAAATAGTGGACATCCCATG  
AACCTTCTCTCTGGCCGTGTGCTTCTCTCTTCTCCAGCAACCTCAACGCA  
GCCTCTTGTGGCCACTTTAGCCTCTACTGTGTGATATGCTCGTCAACTGT  
GCACACAGAGGGAGGCAAATATGATAGCCTCATGGCACATTGAGGCAGAA  
GGACTCATCGGAGGGAGAGAAGAAGTTCTTAATGATCTTCAATTTGTCCCTG  
TTGGCAAATACCCAAGAGGTGTTTCAAGGAATCTCACCTAGAGATCAGCC  
GGTGTACAAAGGGCAGAAGGAAATTGCAACGCCTTTCCACCCTCATGACC  
CTAGCTCAAACAATGCAAGCATCTGGGCTCTTGCAACATCTGGGAGCTTG  
GAAATCCAAAGGGTTACTGACCAACTCCTTACACCACCCCTCCCCAACCC  
CGTGTTAGCCGGAGAGAAGCAACATGCTTCCCCCTGGAAAGCCATTGTGG  
TGTTTTATAATCCATTCTCCTTCTATCCCCGCTCCCCAAATAAAGCCATC  
ACTGTGTGAGGAAGTGACAAGAGCTACCAGTTAGGGGTGCATGGGGGCAG  
AGGCTGTTTTTTAAATTTATTTTGTTTTTATTTTGTTTTGCTTTTTTAG  
TTACTGATCTACTAATGTACAAATGCTTTCTGCAGGTTTCGATGTATTTTA  
GAACCCCTGCCCTCTTAAAGGCAACTCCCAAACAAAACCTCAGATTTCGT  
ACCATGCACCTTCAGGCCAACTGTTGAGTATTCACCCCAAATTCAGCCCT  
TCCAGGGCGTCTGTTAGTGCTCAGAGGCTCTTGACAACAACCTGTTTCCC  
AAGCTCGGTGCTTGCTGATCTAACCTCATTAAGCCAACGCACAAAGTCTA  
TGTGATTGATTTATCCCATATAATAAACAGGCAATTATTCATTGGGAC  
AACCTGGCACATGATCCAATCCCTTCTGTAAGAGGTAGCAAACCAGCAAC  
ATAAGAAACCACCCTGCTATTTGGGGAGAGAGAAATTGCTAATCTGTGGT  
TGTCATACTACAAATGAATTTTCATTACAGTCTGCGGCAACACTAACTT  
CAAGGACCTGTAATTATAAACCATTTGATTTTTTTTTATTTGTCACCTGCTGA  
AAGCCAAAGCATAAAACATTATCACTTTAACACCACCGTTCAGTGGGGTG  
TGAGCTCTCCCGCTGTAAATACAGGTGGCAGCAGATAGATGCATAAGGGA  
AAGCAGTGATGCCCTCCTCACCCACACGCAGAACTAGCCACAAGAAGC  
CCACACCAGGGATGAATCATTTACAAGGGGATCAAAACGGACTGCTCTTT  
CCAGGCACAGGAAAAGTCTACTCTTTCTCTTTCATGGCATTTTTCTCTTT

TAGCCTTATTTGCAAGAGATTATGCAAGCTACTGGTAAAGGATGCAGAGT  
TGGAAAGCAAAATTCTTATGTTTGCCTTCTGAGTCCACTTAGTTGGGTGA  
CTTCGAATGGCCATGCTTCAGTTTCCTCCTCTATAAAATAGGAAGGTGAG  
TAAGCATATCTACCTGCCTCCTAGTGTTTTATGAGAACTAAGTGAGCTAA  
TTCATGTCAACCCCTGGAAGGACACCTGCCCAGAAGAAGCATCCACTGCA  
CGCCACCTATTAGTACAACATGAATGAAAGTATGGATGACTGTCGTTTTCT  
TGCCTTTGAGACTGTAAGCTACTTGTTAGTAGAAAACCTGCTTTAGACAT  
CTTTTTTTGATATTTAGACCGAACTCATTAAAGGCAAATCTGATATTTT  
TCCATCACGATATCCCATGGGCCAATGGGGGTGCCTAGCACATAGTAGG  
TATTTATTGCAATGCTTATATTTACCAGAAATGCTTATAAATATAGAAAA  
TCTTACAGAATGAACAAGTGAATGTTGAAAAATTATTTTTATCCACTTTT  
CCCTTAAGTGGTGATGTGCCCTATTTAATAGATCATGTTGATGAACAGAC  
AGAGACTTAGCGAGGGGAGGGGTGCTCTCCCAAGCATGAGGGGAGGTGAG  
GACAGAATGTGGAATTAACAAGGGAAGAATCCTGTTTGCTTAAAAAGGTA  
CTATATTCTCCCCTGGTGGGCTATCTTTGGGTGTATGTGTTTGACTCAGG  
GGACCACATTTAAGAGGGGCCCCAGCAAACCTCTGTGTTTGAAGAGGTGA  
CGAGGATGTTAAAGTTTCCAGAAAGCATGCGGTATGTGGTAAACCAATGG  
AGTGCTGGAGAAGGGAAGACTCCTAGGGAAGCAGAACTGTGTTCAAGGTG  
CTGCAGAATTCGGGACAACGTTCTCTGTACCCCTCCAGCTACAATGGTCG  
CTAAGTTCTGTGACCCAGCCTCCAAATATTTATTGAATTCAGCGCTGCCT  
CAGCCCCAACTCTTGCTCTCCCGTTCAGTCAGAAAGTTATACTGCTGAC  
GCCCCAAACATTCCTCACTTTAATGGCTCCTCTTCTCAGCAGCAAAAAGTT  
CAAAAACCCCTGGCAGAGAATCCAAGGTCCACATCAATCTCGCTCCAGGCC  
AGCTTTCCAGAATCATACATCCCATACACACCTGTAACAGAAAGCAGGA  
GATATGGATGGACGATTCTAGCTGGGAGAGTGATGATTGTCTTTTCTT  
CTACTCAATGCACCCTCAAGGCTCTGTTCTGAGGTACATCATCACCTTC  
CACCCCGCTAGCAGAACTAAGTGCTCTTCCACCTTTGCTCCCATGAACTT  
TGGGCATCATACTCTGTGATCATTTTCATTGCTCCATTCTGAACCCCTTC  
AAGGCAAATCCCGGACTTTACTCAGCTTTCTATTCCATGGGCTGAGCAGC  
ATACCTGGCACATTGTAGGTACTGAGCAAATATGGAGTGAATGAAAATTG  
GAGGTAGTTTCCAGTTAGTACAAGAAAGATGTTTTTATTATGAGAATAA  
GCCCCAAATGGAGAATGCCAGACAAGGACAGAGACCTGTGATTCCCATGC  
AGGAATATTGTAGAGTGCATTTCCACATTAAGCAAAAGGTTGAACCAGAG  
AACCTTTAAAACTTTTATCAGTCTAGACTTGAGACTCAGGGATACTATG  
ATCCTTACAACCTCAGCTCCAGACGTTTAGCCAGTTCCCTGGAAAGAAAA  
AAAGAGACACATAGAAGTCTTGGTCCTGGGACTTGCGACCTCATAGCGCC  
ATTTCTCCAAGAAATGGAGGGTTTTGACTTCTATATGAAAGTTTTAACT  
CTAGAGCAAAAGAGAAGAATAGTCTAATAGTCTAACAGTCTGGAATTTCT  
AAGACTTTTCTCCAAAAAGATCCAAAGCAATGAACTTGCTTCCTATGTAT  
AAAAAAAAAATGACTTGATAACCTATGTTCTCATAACTGAAAGAGGTAGGG  
GGACAAAACATGGCCTTCTAGATGTGTCAGGGTTGCGATAAGTCATGTTT  
AACTTTACCCAAAGTGAAATAAAGTGTCAACAGAACTGCTGCCCAAAC  
TCTCTGATCAGGTCAGGCAAACAACCAATCGAAAAAATCAATCAAATGT  
GAAAGATGGCCTAACGGGTGGGAATGCTTAACTCTGTGATTCCCATAGGA  
GCCAGGTCTATTTAGCATGTTTCCTGCCAGCTGCTGCTACTCCTCATAGC  
CATGAAATCGCTAGAAGCATATCAGAAGGTGTTGTTTTGTGAGCTGGCTT  
GGCCATGAGCAGGCTCAGAACTTGGCGGCATTGGCCAATGATGCAAAAAG  
GATGCTAGGAATGGTGGGGTCACCTTAGCCCCGGAGCCAGTGCTTTGGGA  
TGAGAGGTGATCAAAACTCCAGAAAGGAATGGAAAATTTATCTTGATCT  
GGAAGAGCAATTTGCTCCAGGAGGTTGGCCCTAGTAGGTGGAAGAGAGG  
AGCAAACATTTTTAAGTCAATGTGACAGAATGACAGCAGGGTGTTTCCAC  
GTGGCCCATGCAGTTGGAAACAGACTGCATTTCCCCAGGGGTAAGGGATT  
GGCAGGAACCAGACAGTGGCTCAAGCCCCAGCCAAGTAGACTAGGGTTT  
AGGACAGGGTTTTCCATTATAAGGAAGGAGTGAAGTATAAGTCAGGAATTT  
GGGGAGCAAAGGTTCAATTTTAGGGACCGAATAAGTAAGGGGAATAAAAT  
GGGTTTGGTGACAGGAAGGTGTTTGGGTCTCACCACACACAATGAACCT  
AATTCTTGACCCCTAGAGTAGATGGAACCTTCTAAATTACCTCTAGCTTAT  
CAAGATTGGTTCAGGAACCAGCCGGGTTGATCCTCTGGTGGTTTTAACTG

GATAAAGCTAGAAGTGGGCAAGGATTTGACATGGCAATGTGCTCACACGC  
CTTCCTGGTCAGTGATAATTGACTCCAGAGCATGTCTGCTCCCCACCCT  
CTTGATTTTTTAACATGACCTGAGCCTCGAGAGGAGTATAATGAAGTTGCA  
CAAACCAATCAGAACTGGATTCAAATAACAACACTGAATGTGGATGAAA  
AATTGGTATAAATTTTCTGCAAAGTAACTTAATGATCCATATTGAGATCT  
TAAAAAATGTGTAATACTTGAACCAAATAGCTACAATTCTAGGGCCTTAT  
TCTTCGGGGGGAAGAAATGCATTAAAGATGGAGAAACAGAAAAGTAGATG  
TCAGGGAGACACTGGTGGAAAGAATAATGTTTTGAATGTTTACCCTATT  
TTATTAGAAATTTTACATAGATCATCTCATTTTCATCCTCACAAAGTCTAG  
AGGATTGGGACAACGATGCTCATCGTAGCATTGTCTGCAAGAGTGAAAAA  
TTGAAACCAGTTTTCTTGTGTAACCTGCTATGAGTACCATTATGCTGTACC  
CACATAATGTTTTACCACCAGACCCTTAAAAACCGTTTATATAAAGAATT  
CTGCACTGATGGAGATAACACTCAGGGTATAAAAAATGAATCAAAGTATAG  
AAAAATCATATATGTAACAGAATTACCAAATACGTCTATAATTTACTCCT  
TTGTAAGTGTGCATGTATGTGAGACAGTTAAATGCTAATGTATCCACATG  
TATATCAAAAAGCTCAGTTATAAATGGGTGGTGGGATCATGACCGGAATT  
TCTAATGTTTTCCAAAATTATTTGGAAATATTCCAAGGTACGAGTGGAAT  
ATCTTCAATAATCAGTCCAAATATTTAATGGAAATAGCGTATTTACCGTG  
TGTTTTCAATGCTAATATATGAGCACACCACTCATTACTGCTTGGCTAAA  
ATACCAATATCAAAGGAATCATAGAGGCCATATTTGTCTAATAATGACAG  
ATGACAGACAATTGAAAAATATCTAAGTGGTGTGAGTAACTACTCTGCTG  
CTATCAGCCTTAGAATATACTCAGTATGTTCTTATGACAAACAATATCAC  
TAGGAGTGTAACCCCCAGCATCAACCAATATATACTCCGTGTTTTCCCAG  
CCTGAAAAGGGCAGGGACCTGCTAACATTCTTTGATATTGAGAATACTTT  
GGGACTGGCTTTAAAAATGATTAAAATTATATATGTGTTACTCCCATATT  
AAAAAAAAAAAAAAAAAAAAAAAAACCTCGGTGGTAAAGTTATAGTTTGCAG  
TGTGTTTTGTGAATTGATGGCAGTCCTCACATCCATAATCCTAAGATAAA  
GAGTGTCATAAACATTTTAATAAGAACATATGGTAGGAAAATTTGGTAGA  
GCCAAGCCTTTGAAGGGCGGCTTTCTTTCTCTAAAACAGAGTCATAAAG  
GTGTGTGGAAGCCTGAGGAGATGAAAACAGACTGTGGTTCATCACTGAGA  
AGCCCAGGCCCAGCCTTATCCTTAAGAAATTAGAGGGAAAGGCGGAGGTG  
GGTAGGCTCTCTAGCTTCATTGACTCTTCTTTCCCTGATCAGGAAGGTG  
CCACCTTCTTTCTTCTGTAAATTCAGGAGCCAGAGGAACAGCTCACCC  
ATGCCTCATCTGTGGTCTGGGACTCTAGAAGTGCTAATAAGGCACACCTA  
AAAGTAAATCATGTTTAATGCCAGGGACTTAACTGGTTTGCAGTTTAGCA  
GCTATAAATCATGAATATTCTGAGATAATTCAGATGGGTTACTTTTTTCAT  
TATACTCAAGAGTTTGAAGTGAAGCACATATAATGATGTTATCTAGAGTA  
TTCCATTTTGTCTAAATATTAGGTTGTTTCAAGAAAGATATATAATAT  
TATATAATATGTATAATAGGTTGTTTCAAGAAAGATATATAATAT  
CTATTGAGTAGATGATTGCCTATGCACAACAGCTTGAAGACTGATGAGAG  
ATGCCCATAGTCAAAAACATTTCTTCTTACAGGTGATATCACACCTAGT  
GCTCCACCATTGGAAAAGTGGACTAAGCATTATTTTTTCTCTCAAGAACT  
CCATTTAAAAATGTTAGTAGTGGGGATCCCTCATGGCTCAGTGGTTTAGC  
GCCTGACATTGGCCCAGGGTGTGATCCTGGAATCCTGGGATCGAGTTCCA  
CATCGGGCTCTTTGCATGGAGCTTGCTTCTCCCTCTTCTGTGTCTCTGC  
CTCTCTCTGTGCCTCTCATGAATAAATAAAATCTTTAAAAATAAATAAAT  
AAAAATGTTAGTAGAGTTGCTAATGATAGCACAGGAGTTGTTGACATTG  
GTCATGAATAAGCAATTAGATTGCATTCTCCCATAGACGTGAGGATCCAA  
CGTAGCCAGAATATTGCTCAGGGAAGAGGGGGAAGTGTCCAGAAGAAAAG  
AAGGCACCAACAGGAATGTGAATTGTGGAGGGGAGTAGATTATGGACAGT  
AACATTGAAAATTGCATAATTATAGTTGCATCTTGGATGACCCAGTTT  
TGGAGCTTTCCAAGCAGAGGGACGGATGAAGTGGTCATCAGGGCTCCTTCT  
GTTCTAGGGTCTCCTCACCTAGTTATCATATCTTTGGGGAGCCTCTCAGT  
GGCCTCCTTCTCTCTTTCCACATTTGTGAAGAGAGATGGGATTGACCAGA  
AAATGGGGAACAGACATCTTTTTGAAGTCAGCTTTGATAAAAAGAGGTGC  
TTCTTTTACTCCACAGCCACTCAGCTTGTTGGTTGTAAGTTTTATATAT  
CTACAATCCTATCTATTTAATCTTATATACCAGAGTCCCTCATTGATTT  
TAAACCCAGAGCCAACAGAAATGTATGCCCTCCTTGGTCTATGCAGCGG

CTGAAATAATAAAAAGTCATTTCTCATGACTGGGAGAGGTCTTTAAGGAA  
GACCACTGGCCAAAGCCTCAGGAGCTCTCTGCACCTGTGATCCTAACTAG  
GAGATCTGAATAACATTAGTAACCAAGGCATCATCTCTGTGTCTAACTGC  
CTGATAGTATGGGCAGTTATCTTCTTCACAGGGAACATCTTAGCCTACCC  
ATGGCAGAGTAACCAAAAACCTCTCCATGGTTCTCCATGGTATGTTGCCA  
CTGTGATCCCTGGCCGTGTTTGAGGAGATATAAAAGACCACGTGAGGACT  
CTCTGGTCTCATCTGGTACCACTTTGCAGAAGGCTCATCTAAAGTTAGA  
ACCTGTCTAGGTCTATTCTGCAGACTCAGCAAGGTACCTGGTCCTTAGAG  
GCCATAAAAGTCAAAGCTGGAAGGAGCACAAATGACCACCAACCAAACCC  
TCGTTTGACAGCAAGTTGAGGGGGAAGCTCATGAGCTACTTAATGGCAGA  
GCCCAGGACAGAGGACAATAGGATACTCACAGCCAAAAATGGACTGATCA  
GCTTCACTGCAAGAAGGAAAAAATAGTGTCAAATAAAAAAGAAGCCCCAA  
AGCAATGACAACCAATCCTGTTTGTGTGGTTCTAGTTTTCTGAGGTATAA  
CAATAACACTCTCGAAGATATTTTTTAAAGTATTTTAACTTGACAAGAGGA  
AACATATTTCCATAGATCCTTTTTTTTTTTAACTTCAAGTATTTATAATGG  
CAAGGCTTCGGTCACTCTAAGAGTACCAGACAGACTGGTGGGACAAGTGA  
AAGCCGCAGTTGACTACTATCCAGCCAATCAGATCTCCCCACTTCCAGAT  
CCTTTCCCCTCCCATAACCATCCCCTGCTGTCAATTTATCAAGACTGGCCT  
GGTCTGTGGAATTCCTCACTTCTTTCACGAGGGCTTTGACCTCCTCCAA  
CCAAACAAGCAAGGTACTTTCTGGGAGAGTGCTAATACCAGGGCATGGGG  
GGTGAAGAGGCGGAAATAATCGATGCTCTAGGACTTTCCACACTTAGTG  
GAATCAATTTTATCAGTGTTTAGACACTGGGTGTCAAGGCTGGTCAGATG  
GAAGCCAAAGGTTGTGTGGAGGAGGGAGGCTGAGAGGAGGCTACTGTTAG  
TTTAAATCAGGACTGCTTCCAGGAAGTGACAGATTCCAGTGGCCAGCTCA  
TTCAGAGGGACGTGCACACCCAGATGTTGTGGATCCTTCCTCTCTAAAAT  
GTGAAGAACCCCCAAAATGCCCTGGACACAAAGGTCCCGAAATGTCCTTT  
TTATCTTGGAAGCCACATGGAAACATGGACTGGTTCTAGAGAAAGGCAG  
ATGCCAAAGGCATTGGGATCGGTCTCCATAAGTAAATCAAGGTTCTCCCC  
GTGGCTGCCCTCTCTCAAGTATCCAAGAGTTAATTACCCCCATGATGTAT  
CTTCCAAATCGGCTGTGTTTTCTCTTTCTTTGGTCGCTCTCTGGGATAGT  
GATGATTATTGCTCTCATCAGAGGTGAGCAGAAGGTGAAGCCCAAACCAG  
TCAGGCTGCTAGCTGGTGGCATGTTTGAGCAGAGAAAGAGGTTGAAGTTG  
CTGCGTTAGTGGAGACTCTGAGCTTCTCATGCTATCATCCCTCCCCTTC  
CTCATGTGCATCAGACTGTTCTACACTTCTGGGCCTCTGTTTCATGGTGCT  
TCTTCTTTCTCCCTTGCCCTCCACCGAGTGTCCATTCTTGGGTCAAGAC  
CCAGGTCCCTACCTTCTCCCTAAAGCTGTCTCCGATGTGCCATCATTAAAGT  
TACCTTGCCCTCAACTCTGTTCCCACTCTGCCAGAAAAAAAATAATAATA  
AAATAAAATAACTAGATTAACACAAAGAGTTAATCTTGGAACCTCCCTTAA  
AAGCAGGTTTCATCTTTATCTAATTTATCTAGCATGTTGGGGCAGCATCTA  
CTAGACATTTTCAGGATTATTTGATAAGCACAAGAATCTGTAGATTTATAT  
TACCAAGTTTCTCTCTACTCCTTAGAATTCCAGAAACCTGAACCACAAGC  
AGGTGCAGATGCCTCTCTAGACCAATACACCGATTTCTCATGAAAATGAT  
GTTGGCGTGGCCCTTCAGATAGTCTGTTAGTTTCTTCTCTGCCAGACCCC  
AGAAGGCAGCTCAGCCCAGGAAGGCCAGTTCTGACTGTGGTGGAGTTTCT  
AGTACCTGGATGGCTGGACAAGGGACACTGGCACCACCGCCACAGCTTG  
GCATGCCGAGTCTCGCTCTTCCCACACCAACCCCACTCTCTCCGCCCCA  
AGCAACAGGACTGTGCAAACAAGAGAGAGGGGCCAGGAGTTGTGAGGTCC  
CAGTGACTCACATGCCGGCTCTAGGCCATACCTACATGACCGGGAGACTT  
CCCATTAAAGTCAGCCTCTTCCCTGATACCAAATGTCCCTACTGGTGACAGA  
TGCATCCTCTGGTATTCTGAAAGTGTCTACATACCTGTGCGAGGTAGTA  
AGCCATTGTCCCCTAGCTCTAAAACATACTCTGCTTCTGATGCTAAAGG  
AACTCTGCGAAGGATATTTTCGTCTTTTGCTAGCTGCCTGTTAATAGGTTCT  
GTCAGTAGGGACACTGGAGAGAGATTGAGGGCAGGAGAATGGACAATGCA  
TTGCTCTCACCCCTTTCACCTGCTATTCCCTGCCGACGCCACTTCACACCA  
GCCATTGATGCAGGCTCCACCTCCCAGAGTCAGTCTAAGGAGCTCTTCCA  
GAGAGACAACTTCAGCAGGGCAGCACTACTCTTTCCTCAGGAGTCTGAA  
GTACTACCCACAGGCCTTTCTCCAAGCTCCTCAGATGCCATCAGCAGC  
CATACAGAACTTCCGTCTCAGGAGTTTAAAGCCCCAGTTCCTCTGGGCCCT

CCCTCTGAGCTCTTCTTAGGCTCCACAACCCTATTGTCATCTTGTGTTTT  
CCTATTTGTTGAAATTCGCATGTGGCTTCTGTTTTCTTACCCTATTCTT  
AACAAATACAATATCCCAAGATTCTTTATGCCTGTTGCCCGGGGAGAAAT  
CTGAGAATCAACATTTTTTTTTTTAAGATTTTATTTATTCATGAGAGACCC  
AGAGAGAGAGAAGCAGAGACATAGGCAGAGGGGGAAGCAGTGTCTACTA  
GGGAGCCTGATGCAGGACTAAATCCCAGAACCCCGGGATCACGACCCAAG  
CCAAAGGCAGATGCTCAACCACTAAATCAGCCGGGTGCCCCAACCCAACA  
TAGTCTTAAACACAAAATGGCAGCAGAGTCTAATAGAGAAAATATTTTCA  
CTATGGATTGGATACTAATTGCCTGAATAATCTTAAACAAGTCACATAAC  
CTTTTTTAGCTTCTAGTTTTTCAGACCCTAAGTGGGAGTTCAATTTTACAA  
ATACAGCAGAGCTATAAAGAGTCCATGTGAAGGAGCTTCAAGGTTTATGT  
TAGAAAGACACCATCATCTGCTCAAACTACTTTTTAATATCAACGGGCTG  
TAAAGACACTGGTTTTTGGTCTCAATAGTCTCTACAAGACAGCTCCTCCCA  
CCTACATCAACCACACAGGAAACATTCCAGATTTGCTGCTTTGTGAAAAA  
CTCACACCTTGACAGGAAGAGGTTGAGATCTACAATTTCTTTTATTGATA  
AGAGCACAATCACCTGTTTTCAACTTAAGATTTTTTCTGGATATTGCAAT  
GCCAGGTTGACCATCCTCCCTGCTGGGAGATGTTAAGCGTTGAGGGGTGT  
CTCTATTGAGGAAAGGGTAGGGAAAAGAGGGGAGGGGACAAACAGGGTGA  
GGGTAGAAAGACGGTGTTCCTTCATATTTGGAGTCATGCCAAGATGTTA  
CAATCCCATGAAGAATGGCTAGATCTGGAAGAACTTGACGGATTAGTGG  
GAAGTGGGGGTGAGGGAAGACGGCACCATCAGTTGCCTAAAACCTGGCCCC  
AAACATGTTTTCTCATTGTTTTGCCAATGGGTTTTGCAATAAATTGGAGG  
AAATTTGGCGAGATACTCAACCAGGGCATGGACAGCGTATTGGGACCAA  
ACAAACAACCGTGAAGAACTTGGCAGTTTCTCATTGGATGTTTCAGAAGT  
GAGTTATGAGACAGTGAGTTGTGAGTTACTTCTGAGAGGTTTACATAATA  
AAAAATTAATAAAGGCCAATGATGACAAGTTTTGCTCTTCACGCTGAAAG  
TCAAAATGTTAAATTGGATATTCATTTACGAAACACAAAGAATTTCGAGAAA  
AAAAAACAGAATCAGATCAAATATTTATGATCATTTAAGTCGAGTCAACA  
CACCAATGCCAAGAATTTAGTCCAGAAAACTATGAAAAAGAAATTATC  
CAGGACTTCTGTAAAGTAACCTGTGGGGTTATTTTTGTTGTTGTTGTTTT  
CTGGAGAGATACATCTCTGAGACCCAGCCATTGCTGTATTTTCTTGAATG  
ACTGTTAATGAATGAATAGAGATTCTTAATAATTTGTGTGCTATGAAACC  
TTTTGGAAATTGGTTAAAGCCTATAGACTTGTATGTTATTTTTTAAATTT  
ATTATTTATTTTAGAGACACAGAGAGGGAGAGAGAGCATGAGTGGGAAAA  
GGGCAGAGGAAGGGGAAGAGAGAGAATCTCAAGCAGACTCCCCACCGAGA  
GGAGAGCCTGACTCAGTGCTCCACATGGAGCTCGATCTCACGACCCTGAA  
ATCATGACCTGAGCCGAAATCAAGAGTCAGATGCTCAACCAACCGAGCCA  
CCCAGATGCCCCTAGACTTGTATGTTTAAATGTATAACTTGAAACACATA  
GGATTATTAATAAATAAATATATCAAAATATGGCTATCCAAGTCCTTA  
GAAACAAAATTGTCTTATATGACATATATGCTTCTTTATTTTTTTAAAG  
ATTTATTTATTTATTTATTCATGATAGACACAGAGATTGAGAGAGAGGCA  
GAGACACAGGAGGAGGGAGAAGCGGGCTCCATGCCGGGAGCCTGACGTGG  
GACTCGATCCCAGGACTCCAGGATCGCGCCCTGGACCAAAGGCAGGTGCC  
AAACCACTGAGCCATCCAGGGATCCCCTATATGCTTCTTTATTAATATAT  
CCAATAACGAGGTCTGGGATGAGAAAAGGCAAAAGTTACCTGATCCTTAA  
AGGACAAGTTGACTTGGCCAGGTTTAGAGTCCCAATGACCCTCAGCTGGG  
GGAAGCAGCCAATCCCAGATGACTTCTTGTGGAAGGAGCCAACAAAGCAA  
ATGCTTTGACCTCACTCTTCCCTTCTTTTCAGTTTCCTGCCAGAGTTCT  
GTGCTGGGGGAATCCAATAAGAAGATGAAGGGCAAAAAGACCCACTAATG  
ACCTTCCAAGAACATGGTGGACAAGGGTAAAGAGCTACCTGGAGAGACAA  
ACAGAAGAAATCCAGACGGTATTGAAGACATTTCAAGCTCTGGTCCAAA  
CCCCCTCCTCACTTCTCTCCAGCCCTCACTCATGGGTACCTTCCATTATGG  
AGATTCCAAAGTCCCAAACATACCAAGTTCTTTGAGTTGTCCATTCTTCA  
ACATAATCTAGTCTAGTATGCCATTAGCCTCTTCCCCTAGTTGAGCTCCT  
AGTTGAGTTCTTACCAAGTCTTCAGGATCAGGATCAAGTGTCACAGATAT  
CCCTGGGTGGCTCAGCGGTTTAGCGCCTGCCTTTGGCCCAGGGCACAATC  
CTGGAGTTCTGGGATCGAGTCCCACGTCGGGCTCCCGGCATGGAGCCTGC  
TTCTCCCTCCTCCTGTGTCTCTGCCTCTCTCTCTCTCTATGTCTATAA

TAAATAAATAAATAAATAAATAAATAAATAAATAAATAAATCTTAAAAA  
AAAAAGGATCAAAAAAGGATCAAGTGTGCGCTCTTTTGGGAAACCTCCAA  
TATTCGAAGGCAACATTTGTCAATGCTACCTGTGTGTTTCTTCAGAACAT  
TGCATCACTCCAATATTTCCCAAATTACTTCCCTAAGAACATGGGTCTTA  
GAAGTGTTATCAGGTGGAACATGAAATACCAGTTCACAGGGGATCAGTG  
TTCCATGAAACGTATTTTGGGAAATAATACTTTATTCCACTGCAGCGGTT  
ACCAGGTTCCCTTTAGACTCTTTTTTTTTAAAAAATATTTTATTTATTTAT  
TCCTGAGAGACACACAGAGAGAGAGAGGGGAGAGGCTGAGACACAGGCAGG  
GGGAGAAGCAGGCTCCATGCAGGGAGCCCCGACGTGGGACTGGATCCCAGG  
TCTCCAGGATCAGGCTCTGGGCCAATGTCAGGCTCTAAACCGCTGAGCCA  
CCCGGTTGCCCTCCTTTAGACTCTTGATAGAAATTTCCCAGAAGGAGTA  
CACAGGTTTTATTTGAAGAATAATCCAGAGAGCAGGAGAGTGAGAGGAAAA  
ATAGGAAGAGTTTGCGCCCTTTGTTGGGCACAAAATATATTAATCCTATAT  
GCTGTGTGAATACACATGGAACAAGATTCTCCCTCTAAATCATAATCTTG  
TCTTCAGATGATACACACTGAGGCCACATATATTTGAACCACAACAACA  
ACAACAAAATGCCAGTCAACATGAACTTTAATCAGAGCAAGAAGCTTAA  
GCCAACCAAGTTTCTAAGGAGTAAAAAATGTTCCAGACCAAATGGGACAC  
ACAGGACTCAGAGAAATGAGGACAAAACCTGTTGTTCCCTAGTAGCTATTC  
TAGGGGAATATTTTCGTTTTCTAAAGATTACTTTTGGAAACATCCATTTT  
ATGTTTCATATGCTTTTTCTGCTTTCTTGGGATAAAAAATCTATTTTTAAAA  
AACAGTGATATTTTTGAAAACTTTAGGGTGTTTTAGTCTAAAGAAGGAT  
GTTAAAAAATAATCTCTCCTCACCTCCCCAACTTCCATGAAGAAAAG  
GGAATAGCATCGCCATGGGGTAAGTGTGACCACTGCGGTGTCACTAAGAG  
CGGGTGAGTGGAAGTGGTAGAAAGCTTGAGGTCCCTGACTTTGCACCTC  
TTCCCTACTAGACTTGTATCTTTCAAACCTTTTTATTTCTTGTCCTTAG  
TCAATTGACAGGGGTGTTTGTGTATGGTTCCTAACTCCGTGATGTTCTCA  
CATCACAGAAATGCCCACTCCAAAACATCAGTAGAGTCTCAACCTACTT  
GGCCCCGTGTTGACACTATTTTCCATACACTCCTTTGTCCTTAAGAAATT  
ACTTGATGGAAGTTCAACTAGAAATGTTTCGTGATAACCTGTGGATGTTTT  
CTTTAGCTCCTTTGGTGATGTTATGGATACCGCGCCTTTGTGTGAGGGG  
AAAGTTTTAAATCAGAGGTGATTTTCAGGAAGTGTGTCCCTCAAGCAACC  
TGGAAGCATGACTTTTCAGACCTGTCACACCCAGTTAGGATCTCCATCAGT  
GGCTGCTCTGGTGTTGGCAAGGTCCTGAGAGTGACCTGTGTGACCCCTC  
GCTAAACTACAAAAGTAAATTAATTTCTTCCAAATGCCATTCTTACATT  
TGGCTATTAGGACCTGAGCAGTGCAGATGCCTGGGTAAATTGAAATGAAA  
ACCATTTTTCTTGAGACCAACTCATAATTTCAAGTCTCAGCAGACTCAGC  
TCCTTTCTACTCAAGCTCATAAATAGGCAATGGATCTTCAGAGGGCTGAG  
TAGGCATGCACATCCCTGTTTATAAGAGGAGACAAACCAGAGGTAATGTG  
CAGTAATGAAAATCCTCTGAGGGGACTGAGCACTTAGATCATTCAGTTCC  
TATAAGCAGGTCCTAATTTCTCTGCATCTTGGATTTTCGGCCTGTAAAC  
ACACTGAGCAAAGGTGACTTCTGAGCTTTGAAATGATGTGGCTACAAGAA  
AACCTCAACAAGGCTGAGATTACCTACCCCATTTGGTGCTGGGTGCGCTTG  
CCTCTCTTCCCTGCCTATTTATGCACCACCAACTTTATCTCATTTGCATG  
TGATTTAAATTTCTACATCTGGGGGCACCTGGGTGGCTCAGTCAGTTAGAT  
GTCTGCCTTTGGCTCAGGTCACCATCCCAAGGTCTGAGATGGAGTCCCA  
TGTAGGGACTCGCTATCTCTGTCTCTCATAAATAAATAAATAAATAA  
TAAATAAATAAATAAATAAATAAATAAATAAATAAATAAATAAATAA  
CTCTTGGATCATTCATCAATTTTTTACTTACAGAAATGGTGACACAACCA  
ATACTTGGAAGTCCAATATATCAGCCTCAAGAATGGAGTGTGTTGGGGG  
CAAGGGGTGTTAAATTTGCCTTTCTTACATGATGGCGACTAGAGTTACAAA  
AAGTACAATTGACTTTTTGCCACTACATTACCTTTCACTCAGGACCAAA  
AAAGATATAAAGACTAAATCTCATTTGCATTTATTTTCTTCTGAATTAAT  
ATTGCAAAGTATATCAAGTGAATATTTTTTTGGAATCAAGTAACGAAAGTG  
CTTTAAACAGTAGGGACACCTCAAGAAGTCATGAGGTAGGCGGCTCCAGG  
AAGGATTAATTCAGAAGCTCAATAGTTGGCTTCTCTCAAAGTCTCTTGGC  
TTTCCCTAATGGTCGCCATTTGTCTGTAGCAGCTTCAAACATGAAATCCT  
ATAAGGCAACATTCAAGACAAAAAGGAAGAGCCTGTTTTGATGAATCTTT  
TTGTGCAATATTTCCCCTCTAGCATATTCCCAGCATCCTTCATATGCTAA

GATTAGATTGCCACATCCAAGCTTATCACTGGAAAGAGCAAGTTCAAGG  
GTCTCGTGATTGGCTTAGATTAAACCAAGGACCCTCCCTTAGCATCCTCAC  
TGCCACCTTCCCTGACACACTGCTTCTCTAAACCTGAGTCAAAACAGAG  
TTCTCTTAAGAAGAAAAGGCAATATATTTTCATTGTTTTGTTTCACTGTTT  
TTTCATTGTTTCAATTTATCTGTCTGAACACATATTATATAAACCTTCTTAA  
CTGATGACAGATTACACAGTTACCTGTAGTGGGAACACAAATCTGCTGCC  
TATATGACAGGTGTGTGGGAGATTTTTTTTATTATAATTTAATATGAGTTT  
ACAGCAGATTCTCCACTTATTTCTATTTCTAACTTCTTTGTTTGTGTTGAC  
TATATTTGGGTATTAAAATCCTAATGTAAAAAAATAAAATAAAATAAAA  
TCCTAATGTTCTTACCAAGTTTATTTTTTACCCCTCGGATCACTTTTTTGG  
TAGCCATGAGACTGAATTGCCAAGCAAAGATTTTCAGTGGTTACCATCAAG  
TGTCTCAAGGCCCAGTTACCATTGATAACTGGCAAAGACATCAAGAATCG  
CTGAAATGAAATGAATAGAACTAAGCTCAGGTTATAATGGGCAGAATGGC  
TTGTGGGTGTGCATGTCTATGTGTTTGAGCAAGTGTGCATACGAGGGTGT  
GTATTATTAGCTGACAACACGACCACAATATGATTTGTTCGATATGGTTCA  
TGACTTAACTACCTGCTGTCCAGTGTAAACGTACTAAGGACAGCCCTCAC  
CAGCACCCCTGAACTCAGGAGTAGTTTAGATCTTCATAGGGACCAGCCAA  
TATGTGTAGTCAGCCATACATAGCCTTACTCTGATGCCGGAATCAAAACC  
AACTTTAAAGAAAAGGGGTAAACACATATATTTAGAGGACACAACCTCCAG  
AATCAAAGAAGGATTCATGCCAGCTGAAAACACAGGTCTGACGTGGGTGG  
ATGCCAGTTTTTACGCTCCTTTGTTCCTTTGTAGAAGCCCTCTATCAGT  
ACCTGTCACCTCTCTAGTCCTCAGTCATTGCGTGTGACTCCCAGAGAGCC  
AGACTAATTTTCCCAAGTTCCAAAGCAATTATATGCAGTTGGTATCTCAA  
CCTTTCTCCCCCGACCCCATCCAAGCTTACCGATCCTGCATCTTGTTC  
ACGGTGACCCTGCTTGAGGAGACACCAATTAGTCCTGACAATGACATTAA  
ATGTCCGCATAGGCCCAGGGTCAGTGGCAACTTTGAAACGACACTTTTGC  
AAAGGGACAGCTGCTGGCAGGTCAATTCCTGAAAGGGACAACCTCTCTGGGA  
ACACTGGGGGGGGGGGGGCATCTCAGCATGGGAGGCAGGGAGCTCTATTTG  
GAACAGGGGAGATCCTTCCCAGATTGGACTAGGGTGACGGCTTCTCGGCT  
CAGTGTGAGCTTCTAGCCAGTCTGACCAGGAGGACAGAGATTTGGTCAC  
ATGGTAGTCCTGGGCTCATGTCTGTCCACTTTTAAAAATAACCAAGTGATC  
CAGCCTCAGAACCTAAAAATGCAAAAGGCTCAGAGTAAATCCCAGACTCTG  
CAATTCACCTCTTCCCCACAGGCCAAACAAGAACTAATTTTAAACAAACC  
ACCATGACCAAGCCTGGGGGAAAGGCCCAAATGCTAAGCAAGCCGGCAAA  
ACTGCACACCCCACCCAAATGTTTACTCCTCCCCGAGCCTTTCAGAGAC  
AGGACGCTGGCCTGGGGTTTGGGATGCTGTCCATTCCACCCTGAAATTCC  
CTTTTCAGGTTAGGATTAGGAAATCCTTCCCCACACCGGTCCCCACCGAG  
CCAGAAGCTCCTACCTTCATCCTTTTTTTCTGTTTGTGTTTCATTAAGACT  
CAAGTCTAGATTCCATATAATAGATGAGCTGAAAAAAGATTTTCAGCTAAAA  
ATTATCCACATACGTGTATAAATCATGAGTTTCTATGCCAGTCAGGGCTA  
GCCAGAGAAACAGAACCAATAGGACATTAATATATTATTTATTTATATAT  
AACATTTATTTTAACTATTTTACTACAGAAATACATAGTTTTATCATA  
TATTATATACGTGTATGGATAATAATCATAAAATATTTTACATAATACGT  
GTGTGTGTATATATGTGAGTGTGTGTGTGTGTTTACAGATAATAAAGA  
AATTTATTTTCAGGAATTGGCTCATGTGATTATGGGGACTAGGAAGTCCA  
AAATCCATAGGGCAAGCTAAAAACTCAGGGGAGGGGGCACCTGGGTGGCT  
CAGTTGGTTAAGCCTCCAACCTCTGGTTTGGGCTCAAGTCATGATCTCAG  
GGTCGTGAGATGGAGCCTCACGTAGGGCTCTGCGCTCGGGGTGAAATATG  
CTTGTCCTCCTCCTTCCATATACTCTCATTCTCTCTCTCTCTCAAGTAAGT  
AAATACATAAATAAATATTTTTTAAAAACCCTACTCAGGTGTGGACTGA  
TTCTGCAATCTAGCAGCAAAATTTCTTTTCTGCGGAAACCTTAGCTTTT  
GCTCCTAGTCTTTCAACTGATGAAACAAGGCCACCCACATTATGGAGGT  
AGCCTCCTTTTACTTACAGACCCACAGGTTGTAAATGTTAACCACACCTAC  
AAAAACCTTTTGCGGCGTCTTTAGACTACTGTTTGAATACATTGGTCAGT  
GCTATATCTTTGCCAAGTTGACGTGAAAGTAACCATCACTGCTTTCGATG  
GCTTCGTTGGCATCTGAACCTCTGCCAAGTTCTTGTGTTATCAGAAGCTT  
TGGGATTGTTCAAACTCTTAGCTACATAATGCCACAGACTTTGTGAGCC  
TGGGGTATGCGGGTGCCAGTTCATGCCACTCCAGGTAGTGCCACCTCTGA

CATGGGGTGGGGGGGTCTCAGTGTCTAAGAAAAATAATAATGATACAAC  
TCTCAAGTTACATGCTTGTATGATGGGTTAGGCAATTTTTCAGGCTATTT  
AGCAGCATTGTTTACTGATGTTACTTTGATGAAATGAATCCTTTACTAA  
CGAGGAAAATTCCAGGCTCAGAAAGGTGTTTGAGGTCATACAGTGCTTTC  
AAGTGGAGGAACAAATCTGAAGCAGACCCTCCTAACTCCGGAGGCCTGGA  
CCGTGTCCTGTAGAACAGCATCTCCAAGACCCCCCACTGGATGGATTAGA  
AATTTCTTCCTTCTTTCCCTTGTGCCTTTTCTTCATTCCCTGCACTCTTC  
CCACCTGTCCTCCTAAAGTGTGACACTCATCTCCTCTGGCTGCAGCCATG  
AGCTGGGAGGTTTGCAGCATAGGAGGAAGGGGTGGATAAAAGGGAGAGGC  
AGATAGAGCTGAGGTGCTGAGCAGTCTCAACTCACAACGAATCAAGGCTA  
AATTTTGAGCCACAGAGTATGTTTTTGCCAAAATTTACAATCTGGCTCGG  
AACAGGTTTTAAAAGGTTACCTCTGGCCAAAGAGGTTCTGGGGCATCTAGC  
ACCACTCCCAGCTGCACTTACCTGGATCAGGTTTTTGATGCCAACATCTTC  
TGAAGGCCAAGCTGGAAGAGACCAAAGAGGCCGCCACACCGGCCCTGT  
CTCCAAGACCAAGTGCTCATCACCCGCTAAGAGCTTCCTCCAGGCAGAGT  
CCGGGCCTCACCTGAGGCATTTCGCAGGCCCCAGTCACTGCACATAATAAT  
GTCTCTGCAGGTCTCGTCCTCCCCTAGCCTCAGGAAGGACCTGCAAATCC  
ACTACACGAGCACTACTGAGTCACGCCACATGCAACGGGGTTGAAAACGC  
TGCCCCATGGGAAGGCTAATGGAAAGAGTCTGCAGCCCTTGACCAGAAAT  
GGTTGCGTTCCACACATGGCGGGCAGCTTCCGTACAGCTTTTTCTCCA  
AGTGAATCAACACAAATGAAAACCTGGCTGATGCTCTGGTCCACCAGAGAC  
TGGAGAACAAAACCGCAAAATGGAGACTGCCCAATTCTAATTTAATTCCG  
AAGAACAAACAGAGAATCACTCAGCAGACCTCAAATCCCCAGTCAGAAAA  
TTACGCCCAGGGAGCCAACAGTTTTATGGACCATCTACCCACCTATTCC  
CTCTGGCCACAGCACGTAGATTAAAAATAGCTCAGAAAACCTTGCTTGGT  
GAGTGACGGTCTCGTTATGACATTGTTGTCCATGTTGGCCTTGTAATTTT  
TGACTGAAAAGTCAAATGCACTGTAGAAAGCATTTATTTACAAAATAAC  
ACAGTATTTCTATGTAGTGCTTGCATTTTGTGTCACTCCTTCATGTCACT  
CAAGATCCTACTCAAATGGCACTTTCTCAGAGAGATGGTTCCTGGTGCCC  
GCTCTACAATGGCACCCCTCTACCACCCAACACTCGCTACCCCTCTAGGTGT  
GCTTTATTTTTCTTACTGGCATCATATCACATATTTGTTTGTTTACTTTT  
GATCTGCCCTCCCCTGCTAGAACGTGAGCTTTATGAGGACAGAGACATCAA  
TTAATTTAATCATGGCTATGTTCCCAGCATCTAGAATAGTATCCAGCACA  
TAGCAGGGATTCCGTAAATATTTGTTAAGTGAATGAAATCAGTGAGCTGG  
TCCAAGGATCAGTCGCTTGATAGACCATGCTGAGAATAAGCAGTCTTGGG  
GCTTGGTGTGCGAAATTTCTTTTACTGGAGAGAGACTCTCAAATTCCTTG  
ACCTTCAGCAATTCACAGCTTCAAATCCCCTGTGTTATGATTAGACAGGT  
ATTAGGGAATATCTGGCTTAGAAGTCCAAATATATGGAAGTCCACATGAC  
AACAGGTACTAGCTATTGCTAATAGTATTAGTGTGAAAAATTAACAAAA  
CATATTATTTCAATTCAGTGCTTGGGTGAAGTAATGAAGCATCGAGGGTGC  
ACAACGTCAGGAAGTGCCAACTGTGCACCTATGTGACCCTGAGAGTGAGT  
GTTTCCTTACATTTTGTCTCTACGTATACTGCTTACCTACCATAGTCC  
TGGCTCTGCAAGAAATGACAAGCAAGGAAAAGGAGTGCAAAAACATTTTT  
AAAGAAGTTGGTCTCATGATGTAATGATGTCTACTGAAAACACATCATTC  
TCCAAGGAAATGTGATACAAGAGAAGAGCGGGGCCAATACAACAGCAGT  
ATCAACATTCAAATTTTAGCTACCGTAAGGATTCCCTGGAGGTCTCTGGAC  
AAAACCTTGCAATTGGTAAGGAGACCAGTGGTCCTCAGAGCTGATCTTCAGT  
CTTAACCTTGAGGTTCCCTTGGGCTTCTACCTGGTATGTCTATAGGTTCAAT  
CAAATGCAAGTTAAGAGGCAGCCCGGGTGGCTCAGCAGTTTAGTGCCGCC  
TTCAGCCCCAAGGCGTGATCCTTGAGATCAGGGATGGAGTCCCACATCGGG  
CTCCCTGCATGGAGCCTGCTTCTCCCTCTGCCTGTGTCTCTGCCTCTCTC  
TCTCTTCGGGTCTCTCATGAATAAATAAATAAAACCTTTTTAAAAATGCA  
AGTTAGTTGAGGAGAGGTCTTTTAGATATACCTACATAGACCAAATTTTA  
TCATTGGAACAAAATGCACTGGTAAATGGGACACCAGTGACATTATACAC  
CAAGACTTTGGACAAGATGAGAAGAGCATGAGCAAGAGGCTGCAGGAGAT  
GCACCAAATCATCAGTTGCCCTAGTTGTTACACACAGTTACTGAAAGAT  
GCCTAAAGTGGTCCATTCCCTATATATTATGATATAGTTCCCTGCCACGTTG  
CATGGATAAACCAGCCCTGCTCTCTCGCTACACCTGATAGCCCCAGAGAA

GGGTTGATAAGTCAAAGACAGTCACATACACACTGGATATGAACAAAGCT  
AATCATTTTCTGGCCATGCTGTTTCCTTAATTCTGCCCAATGTGGTAGAAAG  
GGAGGTGGGCAGGGGGTGGGGGTGACTGGGTGACGGGCACTGAGGGGGGC  
ATTTGATGGGATGAGCACTGGGTATTATTCTATATGTTGGCAAATTGAAC  
ACCAATAAAAAATAAATTTATATTAAAAAATTCTGCCCAATAAAGCTGTC  
CACATAGGATGGGGGCACCTAAGTCCGATAAAATCCTTTCTTTTCAGAAAG  
TATGACTAATAGGCAAAGAGAAGGCTAGTCTCTGAAGCTCAGTTCTCCAT  
GAGGGCTGATACACCTCACAGTCCTGGATCTACTAAGATCTGAGGAGACA  
CAGTGATGGAGGACTTAGCATTCCTTTCTCCCTCAAACCCACACCAACCC  
TTGCAATGCATCCCCATTACTAAAGGTCACCTGTATAGGGGAAATCCTT  
GCAGAACTTGACATAAAGTCTACACATAATCTTCAATGTTTGTATTTT  
TTAAAGGAGATAGAAGTTTATCGAAGGCACTGCAATGGCAGGCAGGACAG  
CAGAGGACAGGCTGTCTACCTCTTCTTCAAATATTTTCATTCATTTTACT  
AATGATGCAACTACCAAAGGAAAGGTGAAAAAAAAAAGACTAAAATACCG  
AGAACAAATGTGTTTGCCTGTTCATCATGTTTCATCCAACACAGATTACTGA  
TTTTTAAAGGAGTTAATGAAGATACCCGCAGTGGTACTCATGACACCTCCA  
CCTGTTAGGGTTTTTTTTTCCACTATGTTTGTAGAGAACTGAAGCTCTGA  
GCTAAGTAGTAAGTTTACTGCTGTACAAATGTGCACCTCCATAGGTTTGC  
TTAATCACACTATATTGCTCTCATCCTAAGTTAACCATGGCCTCTAACAC  
ATAAGATTTGGAACATAAAGCAGCTTCACACTGAGAAAAATAAATGGAAG  
AGAAATACGTAATTATAACCAACCGTTTAGTGGCCAACCTTCAAATGTGC  
CATTGGGGCTGTCAAACCATTTAACTAAATCGAAGGCAACACACTGTGTT  
CTTCCATTTTTTATTTCTTCTTCTTCTTCTTCTTGGTCAAAAGATGGTGGT  
AGGAGATCATCCAATGGACTGTCCCTTCAAAGTGGATGTCAGAATTTCA  
CATCCAGGTTCCAAATGCCCTGGTTAAACAGCTGGCAGAGGAATTTGACT  
TCATGGAAAGGGTTAAGATATGATTGAGTCACTGACCTCCAGTGTTTGC  
TTTGACTTCTTACAGGGGAGTTCGAAGAGGAGCTGCGAAGTTTCCCAAGC  
TCCATTCAGGTGACAAAGGTCCACCCTGCAAACAACAGCCCTTACCTTC  
TGAAGACCTGACATCTATGAAGTAACAGGGATGGAATTTTCTGGCTCTGC  
TTCTTGCGCAGTCATGAACCAGGCTCATCGATTCCAATGAGTTGACCTT  
CACAACCTGAGCCTCAAGAAATTTGTATTTAGTGATCTGAATAAATTGGAT  
AATTGAGTCAGAAAAGGTACCAAGCACTCCCAATGTTAAACAAGTCCAG  
GGGATCTTTGGGTGGCGCAGCGTTTGGCCCCTGCCTTTGGCCCAGGGC  
GCGATCCTGGAGACCCGGGATCGAATCCCACATCAGGCTCCCGGTGCATG  
GGGCTGCTTCTCCCTCTGCCTATGTCTCTGCCTCTCTCTCTCTGTGA  
CTATCATAAATAAATAAAAAATAAAAAAAAAAAAACATAAAAAAAAAAAA  
AAAGTCCAGGTCTATATACCTCCCTTGCTGCTTCCCACATGGACCTGAGG  
TTGCTGGAATAGACCGAACAAAGCTGGTGTACTGACTTCAGGGAAAAGC  
GAAGTTAAGGAGAGAGGTGAGCACACTGCACATATTTAAAAGCCCACTT  
TGGAATCTTTTTTCGCCTGTCAATTTAACTGTATGTCCTGCCGTGGTGGT  
AGTGGAGACCACATTTAAGGATCTAAGTGTGAGCAGGAGATGAAGAAGCA  
CGTTCTATTTCATCATTAAGCACAGAGGTGCCATGGGTCTTTCCAACCTTT  
TTTCTTCTGATGTGTAGGATGACTTACAGCTAAGATGAAAAACCACTCA  
CGACCTCACATCAGGGTCTGTGCCCAAGTGGCTTCAACTAAGCATCCTTC  
GAAACTCAGCCTAAAGGCTAATAGTGAACAGACGGAAGCCTTGACACCC  
AGCCTTCCAGGTCTGCAGCATGAGAAGTGGTCTGTTGTAGGCAGTATTCT  
CTTCTAAAATGCAAATTGAATCTGGTCTGTCTCCAGCTTCAGAGCCTTCA  
CTTGGTGGTGGACAAATTCCGATGTTCCAAACATTGTATAAAAAGCCTTT  
CCTGATTTGGAACCAAGCCGACTTTCCCAGCTTCATCTCACACCCTACCCC  
AGATACCCCAAGCCTTCTACAGTCCAACCATCACACTGACTTGTGGGTTC  
CCTCAGGAAAATAATCAACCCCTTTGTGGTCCAGTCTTCTCATCTGCAAA  
GTGGGGCTGTCTAGCACCTGCCAGTAGAATTGTTGTGAAGACCAAAT  
TAGATAAAAAATAAAGTGGGGGAGTACTCATTACCAATGACCACTCATAT  
CTCCCCAAAGTCCGTATGTTGAAACCTTATCCCCAAGGGGGTGGTATTA  
AGAGGTGGGGCCTTTGGGAGGTGATTAGGTTCTGAGGGTAGAGTCCTCAT  
GAATGGGCCCTGATACCAGAGCCCCCAGAAAGAGCCCTTCTATCATGTG  
AATTACCCATGAGACAAAAGTCGTCTGGGAGGAGCAGGATCTCATTAGAC  
ACAAAATCTGCTGACGCCTTGATCTCAGACTTCCCAGCCTCCAGAGCTGT

AAAAAGTAAATTTCTGTTATTTATAAGTTGCACAGTATGTGATATTTTTG  
TTACAACAGCCTGAGCTGAGACACCTGGTGGGCAGTAGTGTTCCAGTCAAC  
TCAATAAAGAGCAACTGTCAACCATATAAACTTCTTTTTTTTTGTTTGT  
GTTTTTTGTTCTTTTTTTTTTCTTTTTTTTTTTTTTACCATCAACTTCTTC  
ATCACCATCAACATCATCATCATCAAAAGGTCAAAAGAGCCCCGCTGCAT  
CACTCCATGTTGGCTCCTGCTGTTTTAAAAATTGATGGGTGGTACCATT  
TTGCAGCTGACAAAGCCAACCTAGATCACACTGAAGAACATTTCGTCCACC  
GCCTTCATCTTTGGAAACAGGAACTACAGGACTCTTCTCACACAGTTTT  
GTCAGGAGGGTGAAACTCACCAAGACAAGTGGGAGAAGGAGAGAGTCTAG  
CCAACAACATGGTTAAAGAGGGAGGCAGCCCCCTTTTGGAGCCCCTGACA  
TCTAAAGAGTCTGCTCCCCCTTTTCTAAGACTATCCTAATTCCTGTGTTCA  
ACCCAAGGGCACATATTACTCTTCTCATAATATTAAATATGGGGAAAAAG  
ACTCCCCTTAAAGACAAGACGCCCAAGCTCACTGTTGAGCCTTGTTTTCA  
GATTACCCATGCCCACCGTTTACACACCCTGAGCAGCAGCCCCTAACCTC  
AATATCCTCTCACTTTCCAGAGGCGCCACTGGGGCTCCTTTACACAGTTC  
AGTTTTGCCCTTTTGCCGACAATGGCTGTCTGTAAGAGGCCCTCAGCGCCT  
GGAATTTGAAATTGTTTTCTTCCCTCCATTCTCTGAGGACAAGATTGCTC  
CTAAGCTCTGGGCTGCCCCGCCAGTGCAGGCCTGACTGGCTGGCACTGAG  
GGTTGCATGGAGGATATGGATTGTTTTTGAGGATTGCTCATGAGCGAT  
GGAGTGCTGGCATTGGCTTCCTCATAGAAGGTGCATGGCAGTTAGGCATG  
TATTTGCAGGGAAGTAAACTTCAAGAATAAACAGAAAGTACACACACTCC  
ACATCCTGCTAGCCAAGCCCCAGCCTCCTTAGTCCTGACAGGTGATCCAT  
TCTGACTTCCTTACAGAGACACATACACCCAGCAGACTGCAAGGCCTTGA  
AGCATGGCGGGCAGGAAAAAGCACAAACTTGATTCTTCACTTTCTAGCA  
GGGTGGGCTTGAAAATGTGCTTAGCCTCTGTGCACAGACTCCACAACCTGA  
AAAGTCGCCAACATTCTTTTGGTTCCTCCAACATACCAGTCTTCCCCACC  
TCAGGGCCTTTGAATGTACTCTTGTCTCTGCCTGAGATGCTGTCCCCTGC  
CCCCGCCCTCCTTCTCCTGATGGCACTCCTCTTCTCCTGGTTTCAGTTT  
CAATGCCATCTTCTCAAAGAGCCTTCTCCCAGCTTCCCTCCACCATATCC  
CACCCCAAAGATTCTCTGTTGGGGCATTCTTAGCTTTCTTGAAATATT  
TGTCACAATTTCCAATAATTTTGATTGCTTAGTCTTCTATTAGACTTG  
AAGCTCCTTGAGGGCTGCCCTCTGCTCTGTGACAGAGCCTGGTATTG  
GATGGGGACCCAGTCAATATCTCTTAACTCAGGAATAAATGTCCTTGCC  
TTGTCCAGTTTAAATTAGCACAAAGGTAGAGGTGGCTTTGAGAGTGAGCTC  
TGCCATTTACTAACAGCATGACCTCAGGAAAATAATCAACCCACCAGAAT  
CCAGAACCCCTGATCCTGTGGACAAGGGGTTATCTTCAACTGCGCTCACA  
TGAACAATAAGTATTAGTGCCAGAAAGACCAAGGAAACTAATCAGTATAA  
ACTCTTTTGTGTATTTTCATCATTTAAGACCCGTATACTACCCCAACTGTA  
TAACATTTTCCCAACACCCACTTGGAATCTTTCTGCCTCACAAGTGTG  
TGAGTATAAATTGTAAAAATATCTAAATTGTCAAAGAATTTAACAGCAGAG  
CAGATGAAAAAATATTATTGGTGACAAGTTAATACATAGGAATTCACAAC  
TAAGGTCTATTCTTACAATACAAATTTGTTGAGTGTCCGCGATTATAAAT  
CGCAGATGCAATGATGCATAATGAATGCATAATGCAATGATGGATAAATG  
AATGATGCAATATTATATTTCGGTGGTCAACAATCTTCTCGAAAATAAAA  
TATACAACTGTGAACTATCCTAGGAGCCTATAAAAAACAAAACAATATA  
AAAATATTTTCGTTAAGTGTGTTGAAGATCAGAGTGAGTTACAATAAGTT  
AGGAGAAAGCAGTTTTTAAAGAGTTTTTGGCTAAAGTCTTGAACAGAGTGA  
GTGAACAGGGTTTGGCATAGAAAAATTATAAAGGTTTCAACTGGATTTGT  
TTTACTAAGTAGAACCCCTTAATACAGTGTCTTTTTTGTGAGGTACAG  
TTTGACATATAACATTGTGTAAGTTTTCAGATGTAGCAGATGTTGATTTGA  
TACACTGATATATTACAATATGATTGTCATAAGAATGAGATCATTAGTAC  
CTCTATCATGGCACCTAATTATCATTTCTTTTTTTTTTTTGTGGTGGGAAT  
AATTAAGATCTAGTGAATTAGCAAGTATGATGACATAATACAATGTTGTC  
TATATTACCATACTGTGCGTTCAAGTCTCCAGGATTTGTCTTCTAGTTGT  
CAGTTTGCACCTCTTAAAAAACACCTCTTCTATTCCCCCAGCCCCAGCTAA  
TCACCATTTTACTCTGTTTTTATGAGTTTGACTTTTTTTAGATTCCATATA  
TAAGTGATATCATGCAGCGTTTGTCTATCTCTGTCTGACCTATTTCACTT  
AACATATTCTCAAGGTCCATCCATGTTGTTGCAAAATAGCAAGATTTCTT

CTTTCTCCTAGCTGAACAACATACCATTTTTTTGTATGTGTGTGTATGTG  
TGTGTGTGTATTGTATCTTCTTTATCCATTCATCCCTGACTGGTAGATA  
CTTAAGTTGTTTTCCATATCTTGGCTATTGTGAATAATGTTGCAATAAACA  
TGGGGGTGTAGATAACTCTTCCATATCCTGTTTTTCATTTCCCTTTGGGAGA  
GCCCCTTTATCTACAAATGCAGAAAATGAGGTCCAATGGGTTTTTCCCCCA  
CTTAGGTCCTATACCAGAGGAAGGCCAGGGAGTCAGGAGTCCAGGCACCC  
AATATGTCCACTACATCATCTGGGCCATTTTCAGAGGAGGTAGGACAAAA  
TCTGAGCCACAGCAACAAAATGAGTGAGCAGGATGTGGCAGTGGCCGTGG  
CAACAGGACTAAGCCAGAAGTGGAGAGACGTGACAAAAAAGGCTTGAGAG  
TGAATTGAGGGGTGGCCAATGGCTGGTTTTCTCATGGAACATCCTTATTT  
TTGGCACGTTGACTAGTTGAGTGGCACCTGAGTCATCCTTCTCGAGGCCA  
ATAACCAACTCAAACAGAGGAACTCACACATCACTCCCTTCACCTTGGGC  
ATCGTGGGCACCCACCAAATATTTGTTGATTTGCTTTGACTCTGATGCTG  
GACCTATAAGCATGCAGTGAAGCGGTTTGTGTGCACCACCACCAAATGTG  
TTCTATTTTGTGATGGGAAAAATTCAGAGCAGGAAAAAATAAATCACCTCAT  
TTACAGATAGCAGGCATTGCTCTTATTGAATCAAAATGTCCTTTTTTGACA  
TGGAAACAAGAAACAGTTTAGCTAGAAGAACGTGGCAGAGAATGAAAATG  
TAGCATGGAGGTACCATTTTTCACAGCTACGCCCATGCATAGTACCACTAG  
GTGTGGTTCCCTTTCTCTAGCTGGAGAAAGAGCCTCCCCAGAGAAATATG  
GATTTTCAGTTCTACTCTCTCTCTCTCTCTCTCTCTCTCTTTTGGTTAAGA  
TTTATTTTATGATTTGAAAGAGAGAGAGAAAGAGATAGCAAGAGAGAGCG  
GGGGAGGGGTAGCGGGAGAAAGAGAATCTCAAGCAGACTCCATGCTGAGA  
GCAGAGCCTAATGTGGGGCTCGATTTTCAAACTCTGAGTTCATGACCTGA  
GCCAAAACCAAGAGTTGCATGCTTAACCGACTATGCCCCCACCAGGGGC  
CTCCCTCAGCTCTATTCTAATAGCTGCATGATCTTCAGCATTTACCTCTT  
TGAGCTGTAGCCTTCTCATCACTAACACAGGTAAAGCACTTAGCATAATG  
GATGGTAAAGAGCAGGTATTCAGCACACATTAATTCTCCTTTCCTTCCTG  
ATAAAAGTAGCCTGAGGAGAGAGACCAGGCTCCATAGGGAAAGAAAGAAC  
AATCCCAGGGGTCTGGTGGCAGGAAGATGGGAGTTTGGGAGAAAACAGA  
GGAGTAAGAAGTTGTCAGATCATGAGGCAAGCCTTGACGCTTGACAGAGAA  
GAGGAAGGAATGGGGCCATGACATCTAAGAGCAAGGTTCAGAATTTATGG  
ACTCAAAGTCTACTTTAAAGCAAGAGCATCTAGGACACCTGGGTGGCTCA  
GCGGTTGGGAGCCTGCCTTCAGCTCAGGTTGTGATCCCAGGATCCCAGAT  
GGAGTCTGCATCCGGCTCCCTGCGAGGAGCCTGCTTCTCCCTCTGCCTG  
TGTCTCTGCCTCTCTGTCTCAGTCTGTGTCTCTCATGAATAAATAAATAA  
ATCTATAAAAAAATAAGGCAAGAGCATCTGGGGCAAGTTCAATTCCT  
CTTTGGACCTCAGCATTCTCGAGCAAAAATAAGAAAGTTTTAACATTTAA  
TATTGATCTTTGAAGTTCCCTTACTTTTTATGGTCCAATGGTTTTTAACAT  
GGCAAGGGGACATGGGCAAGGGAAATGTCCTTGTTGGTTGTCTTTTCCAA  
CATGGATTAGAAGCCAAGTGGAGAAAGGAACCTTCAGGACCTTGGGAAC  
CTAGAAATTCTCAAGACAGTAACAGAGAGAGAGATGAGAGTGGGGCACAT  
ACATTATGTTTCAGCCTGACAGGTCTTTACTCCTTCCTAGGCTCCACTTTT  
ATTTGGGGGAGGTTGCATGGCAAGAGTGCTAAAGGGCACACTTTAATCTA  
CTACAAAGAACCCTGAGATTGATCAAGTAGGTAAGAAAAATCCATTAAAC  
CATCTGGGGCTTTAACCAGGCTTGACTCTAAAGGGAGCCCCTGTTCTAAG  
CATTTCTCTCCTGGCTGCCCTTCCAAGGTAAAGGAAGAGGATGAGGTAGG  
AATTCAAAGTAGAAGTCTATCATACCAAACAGCTGTCTCAATTACATCCT  
GACCTCTGTTAGTAATGTGGCCTGAGATGTGCTTATAGTTGATTGAGTCC  
CCTGAAACTTAAACACCTCCAAGATAGGCCAGGGACTTCTGAGACATCAG  
TGGTAAAAGACCAAGGAGCCGAGAAACCCCCGCTGCCCAAGTTGGAAAA  
TCAAAGGACACATGTATTCTTGGCTTGGGTAGGTTGCCACTACTCTTCC  
CATCCAAATCATTTGGATCTGCGGAGCTAGATGTATTGTTTTCTGGGGC  
TGGCTGCCATACAGAGCACCACTGAGGTGAGTTAAAACAATACAAAT  
GTATTGTGTGATGGTTGCGGCAGCTGAACGTCTGAAATCATGGTATCAGC  
AGGGCCATGCTTCTTCCGAAGGCACCAGGAGGGCAGCCCGGGTGGCTCAG  
CGGTTTAGCGCCGCCTTCAGCCCAGGGAGTGATCCTGGAGACCCGGGATA  
GAGTCCTATGTCGGGCTCCCTGCATGGAGCCTGCTTCTCCCTCTGCCTGT  
GTCTCTGCCTCTGTGTGTGTGTGTGTGTGTGTGTGTGTGTGTGTGTGTGT

GTGTGTGATGCATAAATAAAATAAACCTTAAAAAAAATGAAGGCACCAG  
GAAAGATCCATGCCCCCTCAGGTAGTCCTTGGCTCATAGATGCATCAATCT  
TATCCTCTGTCTTCGCCTGATTATCCTCCCCGTGATTTCTTTCTTGGCTA  
TCTGTGCCCAAATTTTCTCCTCATGACACTAGTCTAGTCATATTGGATGA  
GGGGCCCAATCTCTTCCAGCATGACCTCATCTTCACTAATTACATCTGCG  
ATGCCACTATGTCCAGAGAAGGTCACATTCCGAGATACCGAGGAGTCAGG  
CCTTTAACATCTCTGGGGGGTGCACGATTTGTGATCAAGAAGTCAGGATT  
TGAAGTAACATTCTGAAAAGATTAAAGACCACGCACATTCACTCCTTGTA  
CCCAGTACTCCTTCACCAGGAGTGATACATTAAAGATGGACACAATGCAGG  
CAGCTTTACCAGATAAGTGGCCTCCAATCTCTCTGTCCATTGACTCAGAC  
CTTATGTTACTCCTCCAGGAACCTGTAGGCTCTCGTAATGCATTCCAGTC  
ACCAAGTAATACACCCCTCAAACGAATCTACACTGAAGCTGTTTATGTAA  
CTAAGGAACCTTGATTATGTTGCATCCAAGTAGAAGTAAAATTTTTATTC  
TATTTAATGAAGGAAGGCTTTTCTGGGGGAAAGGGGGGTACAGAAAGACTG  
AGATCAAAGACAGGCATCTAGGAGAAGCCATGGATATGAACAAATCCGCG  
CACTGACACAGTATCACACCAAATCATTTCCCCAGATCTCCACAAAGACA  
CATTCAAGCCAGATACTTTTCGGGGGGTGGGGGGAGCCCAAAAACAACAT  
TGCATTTACTTCTGCCTTTGCTTCAGGTACAGAAAGTTGAAGGAGGGGGA  
AGGGAAGGGCCATAAAAAAAAAAAAAAGATCTCTCGCTGTTGTCTTTTGA  
CGTATTATTTCTACATTAGTATTATCGGGCTAGTTACCGAAAGACAGATG  
CTGAACAAGAAGCTGATCACATTTCCCAATCTTATTTGCAAACAAGCATT  
CATTTCTGTCTTATCAAGGCACAGTGCGGGTACTTTGTCCATTCTGAATCA  
TTGTCTTAAGCCGGTGAGGCAAGCCACTGGGCAAGGTTTCGCCCCAGCCAG  
AGCCTGGATGCTCAATGTCATTGAACTCAACAAGCAGATAATTAGTATTG  
AAAGGTGTGATTGCAGCCCAGTCGGCCAGGTAATCAGCCCCCCCCCCCCC  
GACCCCCCATCCATTTCTCGTCAGGGTTTTAGACCAATTGGAATCTTA  
GCCCCAGAGGAGGCTGGAGAGAATTATCCTGGAAGTGTAGTATCCCTTTT  
CAAATATAAACACTGGACAATTATCCCAGGCCGTCGGCCCTCCCTCGCTC  
GGCACGCCAGGTCTGGACAGTGAGCAGAGGGGACCTGGCTTTTCCCAGGC  
AGGTCTGCCTCTCAGCCTTGGCTCCCCGGGGCGCTTCCATCAGCTCACTC  
ACATCTTCCAAGACTGTGCAACCTTGGGATGTCTGCAGACCGGGCCTCT  
TCATCCTGGTGCTTGTTTTGCAAACATTTGGCTGCCTCGTGGAACCTGC  
CTCAACCTGAGGCCCGAGTTCCTGTCTGGCTGGGCTGGTGGAGGCTTCTT  
GAGAAGGGCTGGTCTCTTTTCCAGTCGGATCTGATGGCTTGGAAGAGAC  
AGAGTGGAACGCATCTTTCTGCTATCTTCTTCAAAGACGGGATGCCAGGT  
CTCAGTTCTCAGAAACCAACAGCCATAGTTGACATTAACTTGGTTCCAT  
ACTTACATGGGCATTACATGAAAACACATTTTTTTTAGGCAACTCGATAA  
AGCATCAAATCAGGACTTGCGTCTCCTTTTTTGACCAGGGGTGGCCTTCCC  
TCCGTGGACAGGGGGTACCATCTGACCAGGTAGGTACATGTGGAAGTGTA  
ATTGCCTCTGTTATCAAAGGATGCTTTCTCCATGTCTTACAGTGCTTTG  
CCTTAACCAAACCTCACAATGGCTACCGTAGTTAGACAGCAAAATAAACAC  
GAGTATCCATAAAATACTGACTCTTCCAGGCTCCGATGGAGGCTGTGCAG  
CCGGCTACCTGCCCCAGACTCAGAGGGAGGGCCCAGCGTATAAACAAAGT  
TTGCATGCAAGACTCCATGTATTATCAACATATCATGATCAGGCTCCTGC  
CAACCACACAGCAGACACATAACTCTACATTATGTAATGTGAACATCAGC  
AAGATTTTGGGGAGAAAGGCTTTTTGTTTCCTTATTAGCCATCCTCCATGT  
AGGGCAGATGGCTTCTGGATGATGTCCCCAGAAGAGTGCAGAGTCCAGGC  
AACTGCTGTGCCTTCTCACCTCTAGAAAATGCTGACATTCCAGCAGGGGT  
CACTGGACAGAAGCCCCCTTGGCCTTCTGCAGAAGAAGCCTCATTGTGCTT  
TGATGGAACCATATTTTCTTAGCATTTTATTATGAAAATTTCAAATACTC  
AGAAATCTTAAAAAGAAAAAACATACAGTAATCACTCATGAGATACAG  
ATTTAAGATGTTACCATCTCCTGCATGGTGTTTGTGTCTCTGTCCCTTTC  
TCTGAGCCCCATTTTTCAAGAGCCTTGTGCATGGGAAGTCCCTGGCCTGGA  
AATCCGTGCTCCCTGGTTATACCAGAGGCTTGCTGCAGCTTCTCACCAAC  
CTGTGTGCAAAATGAGAAGAGCCCAGCTTACCGTCACAGACAGACCTGGG  
TTTTGATCACAACCCTTCCACTTACCAGCTAGGTGAACCTGGGCGTATTA  
TCTGCCTTCAATGTATGATAGGCATAGAGCTAAATCCAATTAACCTATGC  
TGAGCATTTATTAGACGCCAAGAACTCTTCCAGGTGACACCCACTAGCCT

AAATCCTCACAGTAACCTCTGGAGAGGTGCACTAGTGTTATCTTTCATTG  
TGGGGAAGTGGGCTGGAAGCCCAGGCCCGCTGCCTTGTGGTGTCAATTGTG  
AAATGAGCAATAGTAAATACAGTACATTTAGTACAGAGCTTTTACTTGCA  
GTGCCTTTTCAACAAATAATTCAAGGATTATTATTATTAGCTGTAGTAAT  
ATTTTAGAGAGGGCAGCCAGTCAGTACCCAATTACAGCTCAGGACATAAC  
CAACAACCAACAACAACAACAACAGCTCTGGCTGCCTTTAATAGTTGAG  
GCTACCACTAGTATAGATAGCAACCTAGCTCTAAGGGTAGCACTTCCAAA  
CTATAGGTCACCCAGAGAGCTATTTTCTATACGGCTGGCAAAAACCAAGC  
ACTGCTTTGAGCGCTCAGATTTTTAATTCAGAACACTCGATGGTAGGGCT  
ATGATAAAAAACTGGAAAATGTTAAAATGCCATAGTTGGGTACTTCCATG  
CCATATGAGACAAACAGAATTCAAACACAAGCACTTGTTAAAGTATACCT  
TTTATTGGCGGGATCATCTTTTTGTAAAAAGTGATGGAAATTTATCAAAT  
CTAAACTCCGTCCATATGTTCTACTGTAAACATAGCTATTGATATTGTGG  
AAATATTTCCAGACTAGTTTCATCTCCCATCTGTTTCAGTGCAAAAATATTT  
TCCATGGTAGCTGCCATACAAAATTCTAAACCCTAAAAGTTCTGCGGCTAA  
TGCCCCATAGATGATTAGTTCTTCTCTGTTTCTTGGGTAAGACATGGGAT  
TCCTTAAAGGCCAAGAGGCTGCCATCTTTCAGCCCCAAAATTTCTGGACT  
GCTTCCAACCTTTCCCTCATCTAAACCCCTTCAAACCTCATTCTAACCAG  
ACTCCTCCATTAGGGAGCATGTCCTGATCTTTAAGGTAAATCTCTCTGC  
CTTAGGAAAAGCAAAGGCCAAAGGATGAATGGATGCTAACTTTTGATGAAG  
AACCACCTTTGAGTAAGAGATACCATGGAAGCCCTGCAAGTGGTACTTTT  
CTAAGTGACAGAGCAAAGTAAACAGAGAAAAAGAAAGAAGAAGGAAA  
GAAAGAAAGAAGGAAGGAAGGAAGGAAGGAAGGAAGGAAGGAAGGAAGGA  
AGGAAAGAAAGAAGGAGGGAAAGGAAGGAAGGAAGGAAGGAAGGAAGGA  
AAGGAAGGAAGGAAGGAAGGAAGGAAGGAAGGAAGGAAGGAAGGAAGGA  
AAGAAAGGAAGGAAGGAAGGAAGGAAGGAAGGAAGGAAGGAAGGAAGGA  
GGAAGGAAGGAAGGAAGGAAGGAAGGAAGGAAGGAAGGAAGGAAGGAAGGA  
ATGAATTCTAAATCCAGAGTACTGTTATACATTAATAATTAATACCACC  
CATTGGCATAAGTTTCAGAGACCTGGCAACTGAAATAAATCCAACCTACAGA  
ACACATGTTTTAGAAAATTGAAAGCGCCCTACTGATACTGTCTTTCCCAA  
AGGGATGCAGCTTCCAATAGACCAAGATAGGACACTGTGGATAAATCTGA  
TAGATTCTGCACCCAAGAGGACAAAGCAGAGGCATATTCTGGGTCTTTGC  
CAGTAATAGTTGAAGAAGATAAGTTAGGATTTGGGGAATTGGAGCTACAG  
TTTGAGCGAGAGATTCCCAGCCAGGGAAGAGACAATGATCTCCCCCCCC  
CCGCCAAAAAAGAAAGAAAGAAAGAAAGAAAGAAAGAAAGAAAGAAAG  
AAAGAAAGAAAGAAAGAAAGAAAGGAGATGGACATGTTCAAGGAAAAGA  
ATTCACAGTGATCCAAGAGTGCAACTCTCTCCCAAAGAGAGTTACAGGT  
GATTCCAGAGCTGTATCCACACAAATAGGATTCTTGCTAAAGTCCTAAGA  
GAAAGAGGAATGAAGGAGGGATAAGTAAGGTAGTAGGATCCATCAGGAGC  
CTACATACATTCAAAGAATTATATTTAAGAACTTGCTATTGGGAAGGAC  
TGTCCTCCCAAGACCTTTGGTCACATTAATCCTTCCCTGGGCCATGGAAG  
TTCACCACCAGCAGCTGACATGTCATCATGGAGAAACGATCAAGGATGGG  
GAAGAGAAAGTGATGTTTTAGGTGGGCTGGCAGAAAACTTTGCGGACTG  
CCCTGTTTTTTAACATAACCCACAAAACCTATGTGAAGCCAAGTGTTCTTTA  
CGCTGGGCCAGACTTTCTACCCACCTTGGGGGTCTGCCAGTTTTTCGCT  
GGCTCTCTCTACCCCTGTCAAGCCTTCTTGTGAAATGACTGGTACTTCCCTG  
CTTCCCGTCGCACCCAGACCCAGACACGCCACCTCTCCCTGGGTATCCG  
CCCTATGGTTTTAATGAAAGGAAGCCAAGGGGCTCCTGAGGACACAGAAGC  
CCCTGTTTCAGATGAGGACAAAAAGAACAGGGTCATTTCCCTCCAGTTTC  
CTCGTCTCCTTCCACCTTTCTCTGCACCCCCACCTCACCCCCATCCCT  
TACTGTGGTCATTGATCCCGGGCTTTAATTCAGGGCTGCATTCTGTTC  
CTTGTGTCTCAGGCTCCCAGCTGCAAGGCCATGGGGGATGTTTCAGAGAGT  
TCCAGCTCCAAGAAATTCTCATCTCCATAGACCTGTCTACCCACCTCCCA  
CCTGGCCTCCAGAGAAACAGCCAACATTCTTCAGTCCCACAGAGAAAGG  
GTGTGACTTGGATTACTCAGTGAAGCCTCCAAGCCAGCATCTTATGCCCC  
CCCAAACAATAGAGTTGTATTTTTCTTGACTCCATTCTTTTTATTTGGT  
TTCTCCTTTGATTAGCAGAAAGACGCTACTCCCTCCCCCTACTTTTTTG  
TTTTAAATCCACCAGCCCTGTTCTTCTGCTCTTCCGGCAGAACCCAACCC

CCAACCACAGTAAGGTAAAGCCTTGGATCATGAACCTGAGTGACGTCAGT  
GAGCTTGAGAAACGCCATCCGTTTCTCCTAGGCTTTCTCACACGTGGGAA  
TTGTCTCTTGGGAATCTACATCCCATCTCTGATCTGTTTGTGTTTGGATGC  
TAATCCCAGGACGCTGGGTGAGGTGTTAGCAGACTGACCTTTCCCGTTTT  
CTGAGTCAGTGATCTTAGATCACCAAGTCAGGCGCTAAGTGTTGAAAATT  
AAAATCAATGTGTGGGGCCCCATAAGCGGGAGCCAGGAAGGCGGGAACAA  
AAGGGTGAAAGGGAAAGGTGACACCTCAGTTTTTGGTTGAAACAAAAAGAC  
AAAAACCTATCGATCTGCTGCTGTCAAACCTCATCCTCATCAAGATTCTGC  
TCAAGAGCCTCATGCTGTGAGGCTCACATTACAAAGAATATTACATGGAC  
ATGACCTCCTCTTGGCATGTCTGCATTACCTTTGAAAGGGCTAGCCCGGA  
TCTGAGGTCCCAAGGCAGCTTCTGGCCATCCCCAATACCCAAACTTCCTG  
GCATTCAGGGAGTTTCTATCTGGTTGTCTACTGAGCCCCCTGCAGTACCTC  
AGGCTGCAAAGAGTATTTATGAAGTATCTTACCTTTTACCAAGCTGGGGC  
ATTTTCGGGACCCACCACTTCCACCCCCAGCTTCTCTAACAAGCAGGCAG  
ATGTAATGGAATAACAATGTTGATAAGGCCAGGTGTCTGGTTTGGATTGG  
CTTTTTTAAATCTAGCTCTTATCTGGGATGTCAAAACTAGTAAGTCAGAGT  
CAACGCAGCTTAAATTTAAATATCAGCGGGAACCTCAGACAAGACAACCTTCT  
CATTTTTTACTATGAAAAAATTGGCTCATTGAGAAGGATGGTGCTTTGCAG  
AAGATCACAGAACACGTTTACAGGAACGCAGAGGTCACAATTTTTTATCT  
CTAGGGATTTAGGGTTATTATCAGAAAGATATATGGAGGTTGTATCGGGT  
TGACAAACATTTAGGTTTAAACCAACGTCCTGCCCCATCTCTTTAGACTGT  
GTTGCATGTCTTCAGAATGCCCCGTATCCCCCAAACCAACAACAAACACT  
TTACTCCCGGCTGACAAATTCCAGCCCATCTTCTGGACTTCCTTCTCCTT  
CAGCATATCACACGCAGCAGGTGCAATTCTTTTCAACAAATATTTCTTTT  
CAACAAAGAAATATTCTTTTTCAGTATTGTTTGAAAAGAGTATTTGTTGA  
ACATCAGTCACATGCACAGCTTTTGCTCAGATAATAAAAAAGATACAGAA  
TCTGCTTGTGAAACCAACCGTCCTAATATACTTTCCATATATGTGTTTCT  
AAAAATCAGCAATTCCTCTTTTCTTTTTTCTACAATCCCGTTCTGAAGA  
AGAGACAACCTAATCATAAAAGGAAAGAAATTATCTCTATTTCCCTTTTCC  
CAAGAACACACATACATATGCACATACACACTCAGACACACACACATGCG  
CATGCATTCCCTGTATAAAATCATTATTTGTCCAGTACGATTTACACAGAC  
ATCATGGATGTAAATATACTAGACCTGTGCAAACTCTGAACCTCCAAGTATG  
CATCCTTTTTTTTTTTTTTTTTTTTTTTCAGGCTCCACCAAAAGAAAAGAG  
GAAAAGGAAAACCTCAACAAGCCCCCTAAAGGAGTCAGATCCCCCTCTATAT  
TGTCAGGTAATTGTTAGCAGAAATGGGCTGTAAATAACAAGCCATTTTAAA  
GGAATGTCAATTCAATTCTGTCTTGCTTAAAGAAGATCCAGAGTCTGCCT  
TTGTTCCCTAACCTGAGCAGTTTTGAGGAAATAATACCTTCTTTCAGAAAC  
TGTGGGGAATTTGCAAGGTAGGGCTCCTGCTTTCCAGATAAGCACGGGC  
AGGAGTGGGGACTGCTGGCCAGGAGGAGGCTAGCTCTGGGGGTCAGCCAG  
CACCCAGGGAGAGGGCCAACCCAGCCACAGGGAGCGAGGTGAGGGGGCGG  
CAGGAAGCCAGTGCCTTGCTTTCAGAACTTATAAAGGATCTCTCCTCCT  
CCTCCTCCTCCTCCTCCTCCTCCTCCTCCTCCTCCTCCTCCTGTTGGACTCGGCAG  
CCAAGGCCTCCCCAGTGGCAGAACCACCAGTCTCTTAGGCAACGTGTCCT  
TCGCCCTCCCTGCTGACGGCATGTTTGCAGTCTGGGACGCTTTTCGTGCAG  
CTGCGTCTTTCCAAGAGCCTGAGGTTTAGGGTTTGGGTGAGCTTGGTGGT  
TCGCTTTTTTTTTTTTCCCTCCCCCTACCTTTTTTATTACAGTTTCCAATAC  
ACAAAGCACTTTACAAACATCCATGGAAACCTCTGTGGCCACAGACTTAGA  
AAAAGACAATGACGGAGCGTCAGCCACACACGGGGAAGGAATATGGGAGT  
GTCCACTTATGTGGCATGGTTGTGTTGCTTTCTCTTTTGCTAATCGGGTC  
CCCAAAGCAGTGTTTGTGTTTACTTTTTTGTGTTTTTTTTTTTTTTTAAATTT  
TGTCTGTGTTTTATTTCCGGGTTCTTGTGTTGTGTCGTTTGGTTTTGTTT  
TAGTTGTTTTGTTGTTGTTGTTTCTACTAAAGGCCAGAATGACAAGGGCTT  
TAGAGCAAAGACATGATGGATGTAAAAATGCCATTGCCCTTGAGCTGGTC  
CATGTGGGTAGTTGTACAGCACGGCGGAGCCAGGCCTCTCGTTGACATTC  
GTGAAATGTTTGTGGAATGAATGTGTGCCACTTCTTTAAAGAGCTCTGTG  
TCATTGTTAGAACATACGGGAAGCTTCTTAGAGGCGAGAGTCCTAACATT  
TGAAGTCGTCATCATTCCTGTGCCAGTAGGTTCCCTGGCTCACCTGAGA  
GGGATCTGAGCTCAGGGGACCACAATTAAATGTGACCTTTGTCTCTGGA

AATCTGCTGTCTTATTCTGTATATTCTCTGGAGACAGTCCTTGGCAATC  
GCATTTACCCCCACTTTTCCACCTCTTCCAACCAATTATACAGGAATAAT  
TGCCAAAAAATTAAGACTGAGACCCATTGAATTCTAAACTGACTCTTTGGC  
GGAAAAAAAAAAGGCTAGAACAAATGGGAAGGACTATGCCATCATCAGGGG  
TCCACCTTCTGTGTCCCAGCTTCCTCTCCCCTTAAACCGGCATCACAGC  
CTCCTCTGGGCATGTGAAACATGACCAAGTTTTTAAACATCAGTCTTTGCT  
GTACAAACGAAATGTGTTCATTCATTCAGACCACGTTTGAACCAGAGGATGT  
TAATTTTGATTTCATCCCAAAGGACACATCCTGCAGCTTCAGGGGATAAG  
TCAGGAGTCTGTGCAGAGGGGGAGGATGGTTTACAAGAGCAAACAGTGAG  
TACCAACGGCAGGTGCAGGCCACCACTGAGATCATCAGGTCACCACTTCC  
GCCATGGCTTGTGCAAAATGCAAGACCCCAAGTAGGGCTTAGCATTGCC  
CACAAAACACAAAGTCCCAAGGAAATAAGGCAGGACCCCCAAAGAGACAAG  
TCTGTGGATAAAATAGTTTTCCCCACCAAAGAAGAGAGATGACAAGGGCAG  
AGCCTGCCTAATCTTCTAGCAAATGAATTTTATGCAGGAAGTAAGCATTT  
GAGAGTTGGTAGCTACTGTCTTCTTGTTCCTGTTGTTGTGAGTGCGTT  
TTTACCCCTTCATACTTAGAGCTGTGAAAGTTTAGACAGAATTAACCCGT  
CTAGACTTCTGTTTTCTTATTTGCTAAATGGGAAAAGAAAGAACTATAAT  
GAAACTTTTTTTTTGGGGGGGGGGGGTAGTACAGGCGCTGCATCCAGGGAA  
AGCCTTTTGCTCACCACGGAGCACACAGTAAGGGCTCCGCAAACACTTCC  
CCTTGCTAATAAATGTCCCAAGAGATCAGAAAAGAAAATTTACATCAGGG  
TGATAACGGTGAGGCTGCACTTATCCAAACGAGGACTTGCCTGGATTTAA  
GGGGAGAGTGACAACCCACTTCTGCCCCAGATGACAAAATGATCTGGGAA  
ATCTGGACAAGCCTGGATCAAGGGGTGAAAGGGTGCCACATACCCCCGAG  
AAACAAGAAATGCCACAGGCCTCAGAGAAAAGGACGTAAAGGGATTGCC  
ATGAGACGAAATCAGCCGCCGCACCACTCCTGCAAACCCAGAGAAGTTCT  
CATGAAAGACAAATTAAGAGGAGGGAAGACACGATAGAAGTGATGGTTC  
AAGTCACACTTTGTTCTCTGCTCCCCGGGAGAAAGGCCGCCAACTCTTG  
ATTAGGAAAGAAAGGAGGAGATAAGATCAAAAAGTCACTTGACAAAAGA  
GCGGAGCCCCAGTCTCTCCTCGTGACCCAAAAAAGGAGGGCCAGTGCGGG  
GAGGACAGGGCTGCGGGGGCGCGGGTGCCCTGCGTGCTGGGAGCAGGCC  
TGGATCTCAGGGCAGCGTGTGTGCGCCTGGGCACCCGCGCAGCTGCCTCT  
CCCATTAGCTGTGTGACCTTGAGCAAGCCACACGCTCTTCTCGGGGCTTC  
AGTTTCTTCACATGAAAAGCACAGAGTAATTTCTTCCCTCACCACCTCC  
GGGAGATGTCCAGGGAATAGAGTTGACGAGTGGATGTAAGGGCACTTCAA  
AAGCAGAAGCAGGAAGCAGCAGCAAGGAATATTCATTAGCAGTGGGATTA  
TTTTTTCAGCGATAGGTGAGAAGGCAGGGAGCAGATGCATACGTGTGCTT  
TAGAGTGATGGGCCTGTAGGAGACCAGAGAGGAGAAGGAGTGGGCTCCCC  
CGATCCTTTATGGGAAGGAGCCGCTCCTGCGGCGGAACTGTGCAGAGCC  
ATAGTAAGTGAGTCCAGGCAAAGAGGCATACGGCCTTCAGTGTGGACAGA  
AGTGACATAGTGCCTCGGGCAGGGCGTGGAACACAGGCTCTCAACAG  
CCTGAGGTCCAGATGAAGGCTTCTCCTCTCCAAGCAGGCACCCCTACCC  
CCCCTACTTCCCTACGTGGGGCGCCTGCCCTCTGGCTGGAAGAGAATGCTC  
CTTCTCACCCCTCACTGCATGGCCCCACCACTTGAGCAAAAAGTCTCA  
CCCAGCCAAAAGCTAAAGCACTTTTGACATTTAATACCTAAATGCATACC  
TGTTGATATTAACTCCGCCCCACCCCTCCCACCTCACCCACCCCTCAAGCC  
AGTGCAATAGTTGCTGAAGCTAGTGATCCTCCTGCTCCTGTTTCTCATTT  
TCCTGCACCTCTTCCTTCTCCTTCTTCTAAATAAATCACAGTTTGGATTT  
AGGGGCAGGGATGGAGATGGGTGACACTGTGTTTCAAATGCCTCCGGTTG  
GAAAGGCTGTAGAGTGTTAAGTCCAAAGTGAATTGTAAGTCCCCAAAGCG  
CCTAGGCAGGGCACATCCATATACACACACTTGCAACCTTGCTTTCCCTT  
TAAATCCTCCCTCCAGGAGGAGCTGGGGAGGGATTTGTGTTTCTGGGGC  
TCTTGGGACTGCAGTCCCTGGGGCCATCTGGGAGTGATTAGCCTACAGAT  
TTCAGGTAGCTCCAGCCACACGTGCAGCCACATGACACCCCTAATTCCA  
TACCCACAGCTCTCCTTCTCCAAACAAACAGCAGTGCCGTTTGCAGAGAA  
AAGAAAATGCCTTCCCTTAGAGGAGCTGCAGGGGAAAGCCAGGTCATACTT  
GTCTCCTCTGTACTCCCCCTCCAGCCCCCCCCACCTCCACACACACACA  
CACACACACACACACCACCACCACCACCACCACCACCCCGCCACCATTTC  
ATTCAACAGTCAGTCACTCCGAGACTCATCCATGAAAGGACTGTGCTTTA

TGCTTAGAAAAGCAAGCAAGAAAACCAGGAAGAAAAAATATTTATTATC  
ATTGTATATTTGGGTAGCAAAGTCTAGAGGTTTTAGAGGTTCTGATATGT  
TAATAATGACTTCGGTTTTGTGGTTTTGATTGTTTTCTCAAACCTGTAAAT  
CCAGGCCAGAAATGTGTAAAGATTGCAATCTGAAAGCTTTATGTCCATCA  
CTCCAAATATTCTCCAAAGGCATGTCTCTAACACCCCTCTCTTATACAAAG  
AAGTCAGAGAGCAAGAACTTAGAAGAAGCTTCCAGGCAAGGACAGACTT  
CCTTGTGAGTGGTACAGATAGCCATCTATAGGACACATTTGAGGGAAGCC  
ACAAAGCCGTCTCATCTAATTGGCCTAGGTATCCCACTCTGTGCCTGGTA  
GCTGAAATGTGTCACTAGGCATTCATTGATTTGGCTAAATTTTGATCATT  
CATTCCTGCACTGAGCACATACTCACAGTAGACAAATGACAGCATGAAAG  
GGCATGAACAAAATGTTATAAGGACACACAGAGACAGGAGCAAAGATCTT  
TTCTTAGAGAGACGTCAAGTCCCCACGGAGGGCGACATTTGAACTGGATC  
TCCTTTTTCCTACCACCAGGGTCTGGCTGCCTCTTGGACTGAGAATATATT  
GACCCCTTAATAGTCATTTACTCTATAGTCTGAATGAGCTTCACGTCTTTT  
CTAAGACAAAGGTAGGTGAGGGCCGCTTTTATTGGAACAGACGCCCTTCC  
CTCGAAAGAGAGAGGAGTACTTGGGAGAAAGGGTTGTACGGAACGCTCCC  
CAGTACCGTAGAAAGGAAAAATCTTGAAGAAGGGGGAAGAAGCCAGTGCAT  
CAGTCTAGGAAGCCAGGGCTAGTTCCAACCACGGGTCAATTAAGAAACAGC  
CAAAGGACATGGAAGAGACTTGAGGAGTCAGGGATGCTCTTAGGCACCAG  
CAATTATAATAATAACTCTTTCCTTCTAAGGGAACATTGCTTGGAATTTT  
TAAGAATCAAAGAGAACTAATCGTTTCCCCGAACCTCATTCTTAAGTCT  
CGGAGGCAAACCTCACTCCCACTTCTGGTTGGTCTGACTGAAAAATCAA  
GCGTCTTGGCAGAAGTAAAAATGGGCTGGGGAAGCAAGTGCAAGGACAC  
GAGAAGGGGTAGATGAGCGTTCCTTCCATCCTGTATCTGATCTGGACGG  
AACTAGCCCCAAAAGTTGGCTGAAGCAGGTCTCAGGCTCCACTGAGCTGAG  
ACAGGTAAGCTTGGAAGCAGAGGTCCCCACTGATATCACCCCTGAAGCCCT  
GCTTTCCTCAGACCTAAGTTCCTGAAGGGGAGTCAGAAATCCAGAGTACCT  
CCTAAGTGCCAGGAAAAATAAAAAGCAATTAGTGACTCTGGCTTTAGGCAG  
GATCTAGAGGGGAAAAAGAAATCCTGGAGCCCCACAAAGCTCCACCTCCC  
TGGGCCTCTTCCGGAACCACAATGTTTCAGCCCACTCAGCGTTTGGCCAAT  
GCCACTCTCTCCTCCCTCAGAAGATTTCTTTGCTCCTGGAAAATCATCTG  
GAAACTGTATCACCCTGTGCTGGTTGGCAGATGTCCCCCAAAGAGAGA  
GTGAAGCGTACCACACACTACAAGGCATTTCTGGGCTTGGAACCAAGAAAG  
CGGAGGGGTGGGGGTGGGGGTGGGAGGTGATGGCTCATGCTAAGAGCGGC  
ACAGCATGACCAGAGATGGAGGACAAGAGGTGACTTCTGGGGCCCAGGAA  
AGGGATGGAAGGAACCTGCCATTGAGCCAGGTGTTTCGGGACCACTCCTC  
CCTCCTGCTTGGCCTTCCCCCTCAGCACTCTGATGGAGGCCCAAGGATGGG  
AGGGGAGGCAGCTCTCTCCTTGACCCGCACACTCTTTTGGAGCAAGGAAA  
TAGAAATCCGTGTGTAGAGCCAGAGAAAGAAGGTCTCGGGACACAAAATG  
CCCAGGGGGGCAAACACGGGGGTATTGGGTGGACAGAGGCTGAATTCGGG  
CAGAAACCGGACATGAAGACAGTAATAGTAGAGACCTCACCTTGTCCCCT  
TTGGATGCAGGGGCACATAGTAAGGCCCCGAAATGTATTTGCTGAGCTGC  
TTTGTAGGGGGGGCGCTGAGAATGATCGGTGCTGAGCTAACCGGGCGACA  
GATGACAAGTGGAAGAATGACAAGATGTCTCCGCTGGGTGTACTTTCTC  
CACCCACAACGTCTCTCCATCGTCTGAGCCCCGAGCCAATTCTCAGGCA  
CATCCCCCGGGTGCTCCAGGTCTGCTCCAGATCCTCCTTCTGGGGTCA  
CCCATGCCTCAAAATCTGCAAGCATCTGCTGCCTATGATTCCCTCATGATG  
TTAGTGTAGTTGAGGATCAGAGGAAAAGTCTGAGTTCTGGGCTCCCTCCGGA  
GACTTTGTCTCCAGAGCCCCCCCCACCCCGCCCCGGGTAGAAGTGGAACC  
TGGGGGCAGGGGGGTTCGGTGAATGCCTGGGGTCAGTGTCTGTGCCGAGA  
CCACCGAGTGTGCCTTCCCTTCCCTATAGGAATATCCACCCTAGCCAGACA  
CCACCTTTTCTCCTAGTTGCTGAGAGAGACATGTACCCCGAGAGGTGTC  
TCCATCACTCCAGGGAAGAATTTAAGGGAAAGATGCCTACATTTCAGGGCC  
CTCTGAGACTGTACCTTCTCTTTTAAAGAATAATCAATGCCCTGATGATT  
GAATCTATGGGGACCTTATCCCTAATTTATAGCAGGAAGTGCCTATTTGT  
CTCTGCTTTGCACGTGGATATTAAGGCACACGAGGGTAAAAAGACAGTCC  
ACTGCCAACCCAAGCTGACAATTTTGTGAGCTTTTCGGAGCACCCCAAAGG  
GAAGCCGTTTCTGCAAACAGCCCATACCTTGTCCAGACTGTGCTCTGCTG

GGCCTTCCCTTGCATTTTCAGCCAATCTGGATGCTGGGGGAGAAGCAAGTT  
CCAGTGCTAGGACTCAGTGTGAAAGCAAACAAGCCTCCCTTCCTGGTTGG  
ATGTAAATACATTGTGTTCTAAAGATAGTAACAGGGACGCAGTGAGATCT  
TCTGGGGATTTAAGGGAGGTGGAAGGAACAAACAAAACTGTCCTCTTCT  
TTGCCTGGCCAAATGTCATTTTCATTAAAAAAGTGAAGGAG  
GAGGTGTAAGGGGAGGGGAAGGGCATTTAAGACTCCACTTACACCTTTTA  
CACCAGTGAAAGGGTCTCGGGAGAAAAGAGGTTAAAGAGAAATGGGGGAA  
AATGCAGGAAAGGGGGGAAAACACCCGACTTTCTCAAAATTCCTATCTG  
CCTATTCAAAGCTGAGACTTCCAGAGGCGGCCCTGGCTTCCCCTTCAAAC  
AAACCCGGAATGGAATCGCGTAATAACAGTGTCTCTCCCGCAGGCTTGCA  
GACAGCAAGCCGCACCAAGAAATTAATTGGAAATAAACAAGGACATTGTA  
GGCAGCCCAGGGGTCCCCACCGCAGGTCCCCCCTGTCAGCCCCACTTC  
CCAGGTTGTTTTGTGACGTCACAGCTCGGAGCCCACTCCGCAGACAGAGC  
CCTCCGCATTAGGAAATCACCTCCAGCAAACCTCCAAAGTTGGGGGCTGA  
CTCAGTGGCCTCGGCCCCCTCCCGGGTCCCGGGGCAGAAGGAGCTGCTGCC  
ACCGGACCTCCCACCCAAAGTCAGGCCACCGGGGCTTCGGGCTCACGCTG  
CTGCAAAGCTAAGCACAGTTAGCAGCTGCAGGATACCCAGTTTGCCTCAG  
GGACTTTACAGGTTCCAGTAACCCAGAAAATGTGTTTTGCCCCCCCCC  
CCCCCCCCGGGAGACTGGAGGGCCAGGGTGAGAGAGAAAAGGCTTGCAAGA  
AAGTCACAAGACAACCTCATCTTTAATCCTGACAGTTACCTTTGGAATTAT  
TTCTTAAGAACATTTTTCCCTTTTCTGTGGTTTGATGGAAACATTTTTCT  
CTGATTGATAAAGACCCGACATAATAACCCACCCAATAGGGCATCTTAGT  
GGGAGTAGCTGATTAGAGTCCCTTCCGCCTGAGATGAGGTCACGGCTATA  
GAGCCCAGGCTACCCTGGGAGACTCACACAAGACTGTGCTGAGAATCTCT  
GCTCTTTTCTGCCCCGAGTCCACCCTGGGACTGAACACCCCCCTTACACG  
GAAAGGGCCCCGAGGGGAGAAGAAGGAGGCGCAGGTGCGAGCCCAGGAAGT  
GCAGAGGAAGCTCTTGGTGCTGAAGGGAGCCCCTGGGCCCCGTGCAGGCG  
GCTGCAAATGAAGCACCACTGCACTGAACACTTATTTACCTATATTTTT  
AGATCAGCAAGGCATAGGCAGCTTCAAAAGAAAAATGCATGAAAGAGGAA  
CACTGGGGAGGGAAAAATAAAACCTGGCCTAAGGAAATTTCCAGGCTGTT  
CTAGGGATGCTTTGAGGGAATTCGAATGACGCGCGCCTGCCAGTACCCT  
GCCTACAGACATATTTTCGGAAAAGGAAAGGGGGGCAACACACAGGCAC  
GCACTCCCTTTGGAAGCACAGTCCCTTTGGAAGTGGGACTTCCCACTCCC  
ACCCACACACCGCCCCCCTTCCCCCTCAGCTACTCAGCTACTCAGTCCT  
GGAGGAGCCAGCTCGACTGGTCTCCGGCTCTGGCTCCCATCCGCACCCCC  
GGGGCGCCCTGCTGGGCCACAGCCGCGCGGCCCCGCCACCGCCCAGGT  
CACCTGGAGCGCTTTGCCGGGTCCCGCCTCCCTCACCCAGCACCCGTCC  
TCCTCACTCCTCTTTCTGCTAGAAAACAGAAAAGGAAGAAAACGGAAAG  
CCCCCTTTTGGCCTACAGTTTCAGCGGGGCGCGGGGGCTCGACAGTCC  
GAGGTGACTCGGGTCGGATAATCTTCCCAAGTGGGGCGCCGTTTGGGG  
AGAAATCCACACGTGCGGCTGTGAGAGTCACATGCGTTTGCGGAACCCTT  
GCTGGGAGCTCCGGAGGCCTGCGACGGGTACACGCCCCACTCGGGCAAAA  
TGTCAAAGGTCACCTTTATTGGGCCGCCACAGGTACTTATTGCGCACC  
TAGGAAGGAGGCCACCTGCGCGCCGAGACGGGGCCGACCCGCCGCTCCAA  
GAGAAGAGCCGCCGGCAAAGGCGTCCCCAGCACCCCCCCCCACCCCCGGCC  
CTGGGGAAAGGGCTCATTCAGAGGGGCTGCAGGGAGCGGGGAGCTTGGG  
GACCTCGGGGTCCCGCCGGAGGGCACTGGGGTCTTTTACCCCCGGGGAAC  
CGGGCCCCAGGGGATTGACGGAGAGAAGGGGTGTGCGCATCCCTGAGCAC  
CTCTCCAAGAGCATGCCCCGGGGCTGAGGTCTCGGGGACTCTGCAGCT  
CAGCCCCACCGAGTTCTGGACCATGCACCCCTCCTGAAGACGGATTGAGA  
CGCGTCCCCACGTTTGCTAGGAAATTTTGGAGAGCGGGTTCATATGGTT  
CCTGATGCTCCGGGTAAACAGGGAACCCCTTCGCCCCCCCCATCCGGAG  
ACGGAAAACCCCCCTGTGCGCTGTGTTGCGACCGCGGGCGCGGAGCCCG  
AGAAACTCGCAGTAAGCCAACATCCCTGGGCTCCGGACTCCGCGCCCGCG  
TAGACGCGGAGGGAGCTCGGCGGCCCGGCTGGGGAAATTGAACCGGCG  
CCGGCCCCAGTCGCTGAGAGGCGGGGGGGCTGGGGAAGGGGGGCTGGAGA  
GGGGTGATCCCGGACCTCGGGAAACCGAGGTCCGCCTCGGAATCTCCTTG  
CGCTCCGAGTCTCTGCTGCGCGGGCTGACCTCGCGGCGCTCGCCAGA

GCCGGGGTCGGAACCTCGCGCACTTGGGAAGTGCCCTCGGCTGCCAGCCTC  
CTCCCCACTAGAACGACGAGCCCAACGCGTTCGGCTCTCGGCAATGCTCT  
GGCTGAAACTGGGCCCCACCCAGCCTCAGTTTCCCGATCTGTAATCTGAAC  
ACGGAGCATGGGTTCCTTCCCTCGGGCTCCCTCTGACACCGGTCTCTG  
GTCGCCGACCTCCTCTGGGGCGCGGAGGAGAGGTGAGGGGCGACCCGAA  
AAACTCACACTGCACCGAACCCCTGAAGGGTTGGGGGCGGGGGGAGTTGT  
TGGCACTAGGGCCCCCCTGCAGAAATTCAGGGCGGATCAGGGGTGTCCA  
CGAGTCAGGCTTGGCCTGGTCTTGGCACACCGCGCAGAGGGCAACGTCTG  
GTATCTGGGAGACTGGGGTCCTTCTTCTGGACCTGGTGTCCCCGTCTGT  
GCAGACTTAGGAACGTGAGGCACCTTGAAGGCTCTTCTTCTTGGCAGGT  
CCCTATAGACACACACACGCTCCAGTTCTCTCTAACTGGGCTGCCCA  
GAGGTGAATCCGAACAGGAGGGAAACATCGAGTAGGAATTTCTGCAGAGA  
TAAATCTCAGCAGCAAAGCAGTCCTGATTGAGGGGAGCTCCCCACCACCA  
CCACCACCACCACCACCACCACCACCATCTACGTTTTTTCTGCAGTTTCT  
GGGAGTTGGGCAGTTTCTGGGCTTTTGGCGCCCCCTCCGGTTACAGTTGA  
AAATTGCAGCATCTTAAAAAGTCCGCCGATTGTTTATCACAAAGTTTTCGAG  
AAGATAACAGGAATACAAAGTGTTTGCATCAAATGGACAGAAACATATAC  
GAAGCCCTGTAGGTTTATGGTTTGAAATTCGATAGATTATGTATCCCTGG  
TTACGTAAATTGCGTCACATATCTATTACGTGTATGTACTTCTCTTGACA  
AATATTTAGAGAAATATTGCAAAAATATCTTAAAGACACAGTCTCCGGTG  
ACTTTAAGCCCCGTAAACATGAGAATTATAATAAAATGCAGCTAAATACA  
GACGCCCTGGTTAAATTTCTGCCCGAAGTTCTGGACTCTGAGTGTCTC  
CGGGGTCAGGTGTCTACGAATCACAGAGTTGTACTCACAAATGACCCCT  
CCCCAAGACACAGAAATCTGTTGCTACCACGCGGGACTTGTTTCTCCCAA  
GAAAGCACCAAGTTGTTCTTCTACTTTTCCAGCATATTCACGGACCCATG  
AATACCTGGTGATTGTATGGAGGGCTCTAAACTTGTAACAAGCTATGG  
GATACTATCTGTATCCACTCTGAGTCAGTTGCATTTCGTTTAAAAAGCAAA  
CACCATTTAAGTGTAGTTGTGAGTGACTTACTACCTTCTGAAGAGTTCCG  
TTTCTATGAGAAATGTGCACTTCTTCGGAAGAAAATGAGAGAAAACAAG  
ATTTAAACAAACAAAAAAATTTTTTTTCCCCTCCAGGAAAACATTCT  
TTTAAATCTTACAGTAGGTGTCCGCAATCAGAAATGAACCAAGTCTTTGC  
TAGGATGCGGGCCGATTACCCATAACAAGAATTTAAGTCGAGGCGGACAT  
CTGGGAGACCCAGAAAGGGGGGGGGGAGTTTAAATAAGGAGATCTCCAC  
AGTTGCGGCTTTATTTGTGACTCTGAAGACCTGTAACCCCGCAGGAGGT  
AGGATTTTTCTTCTCTCCAGAAAGTGATACCTAACCGGGCACTAAAGGCA  
AGTTGGTGCAAACACAAAGGTCGTGCTCAAATCACACTTGAGGTCCATCA  
GAGACATCCCCATCCCCACCCCCCAACACACACTCCCTCCCCCAGAACT  
CCCAGCTGCCTGCGAGTCGGAAGCAGCCGACTTACAGTCAGGAGACAC  
AGGAGCTTCCCCCTCCAGGTGTGCTGTAAAGGAGGGCGAGAGCCGGCGAG  
CTGCACGACTCCGCCAAAGTGAGTGTTTTGCGCGCGGTGGTGCCCATAT  
GCCCAGCCTTTCTGCAACCCGAGTGACCGGCCTCAGCCTCTCGGCCCGGG  
AATGGCACAGTCGCAAAGCTGGGTCCCTTGCAAGCCGAGCCCTTTGCAA  
GCTCTTCCCAACGGCGACCTGCTGACAGTGTGGAATCGGCCGGCCGGGA  
GGTGAAAAGCAGAGCGTCAAAGCAGTTGCCTGTCACTAAGCCGCGTGCG  
GGGTGGGGGCTCTGGGGTGGGGTGGAGGGCCTGGGGGCGGGGGGGGGG  
GGTGCTGGAGTAGGACTTGTGAGAGTTCAAGGTCGCTGCGGCGCGGGACG  
GCTCCGGGGCTAACTGCGCCGCGGCCGCTCCGCGGGGACCCAGCT  
TCGGTTTCCATTGATTTCCCTTTGCAAGAGCGAGCGAGCGCACCCGAACC  
CCCGACCCGCGCACACCGCGGGCGAACCAGGAGCGTCTAATCTATTTA  
TACGGATTATTACGAGGAGACCGCGGGCGTTGAGTCGCCAAAATAAGTTG  
CTTCAAAAGACCATTTCTAAGCACTTTTCGAGAGGGGCGAGCTCCGGGCGC  
AGGCAGGGGCTGCGCGTTCCGGAGCGGGCGCTTTCCGAATGCTACAGAC  
TCCAGCCAAGCCTCGAGGACCGTGCAAGAAAGCAGGGGAAAGAAATGCTCC  
GGGGGTGGGGGCGAGAGCTAGTCTAGACACGCGCACGCGGGCGCGCGCGC  
ACACACACAGACACACACACATAGACACGCGCGCACACGCGCACACGCGC  
GCAGGCACGCAAAATTCGTGCAGAGACGGCACCACTTCTGACATTACG  
AGAGCACGGCAGACTTACACACTTGGACGTCCCGGGTCCCCCGCCTTCCC  
CGCTGCACCCCCACCTCCCCCCTCCCAACCCCGCGCCAGACCAGAGGCA

GCGCTCCCCTCCCCGCTCCTCCCCTCGCCTTTCGTACCCAAGCCCGGAG  
CCTTACCCGCAAAATCCAGTCCAATCAGCTGCCTGCCCACCCCTGGAATG  
CCGGGCCGTGATTGGCCGGCCGTCTCTAAGGTGAGGCGCAGTAGTTATTA  
AAGAGCCCCGGGGCCGGGAGTCGGGGAGCGGAGAGCGGAGCTTGAAACTC  
ACTGGAAACTTCAGTGGCGCTGCGACTTGCCCGATTCACTCCAGGAACTT  
TTCTCTGCGGGAGGAGAAGCGAAGGGGTGCAAGCGCCTCGCCTTTGCTCT  
CTCGCTCCCCCTCCTCCTCCTCCTCCTCCTCCTCCTCCTCCAGCTCGCCTCCCC  
CCACCCCGAGCGGGCAGCTGCGGGCTGGCCACCGCGCGCATCCCCGAGCG  
CCCGCCGCCGCCGAGCCCCGGGACGCGCCAGGCTCCCCGGGAGCCGCTC  
GCCCCGCGTCCGGGCAGCCGAGGGGAGAGGAGCCCGCGCCTCGACGCCCC  
GAGCCGCCGCGGCTTCTCGCCCTTCCCGGCCACCCGCCCCCTGCCCCGGG  
CCCCGCGC
