# Supplementary material
Source: publisher figshare collection journal article supplement (https://karger.figshare.com/articles/dataset/_/5128345)

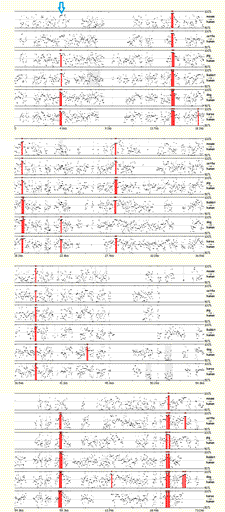

Supplement: Supplementary file 1 [file 1 › 000435871_sm_Figure_1.gif]

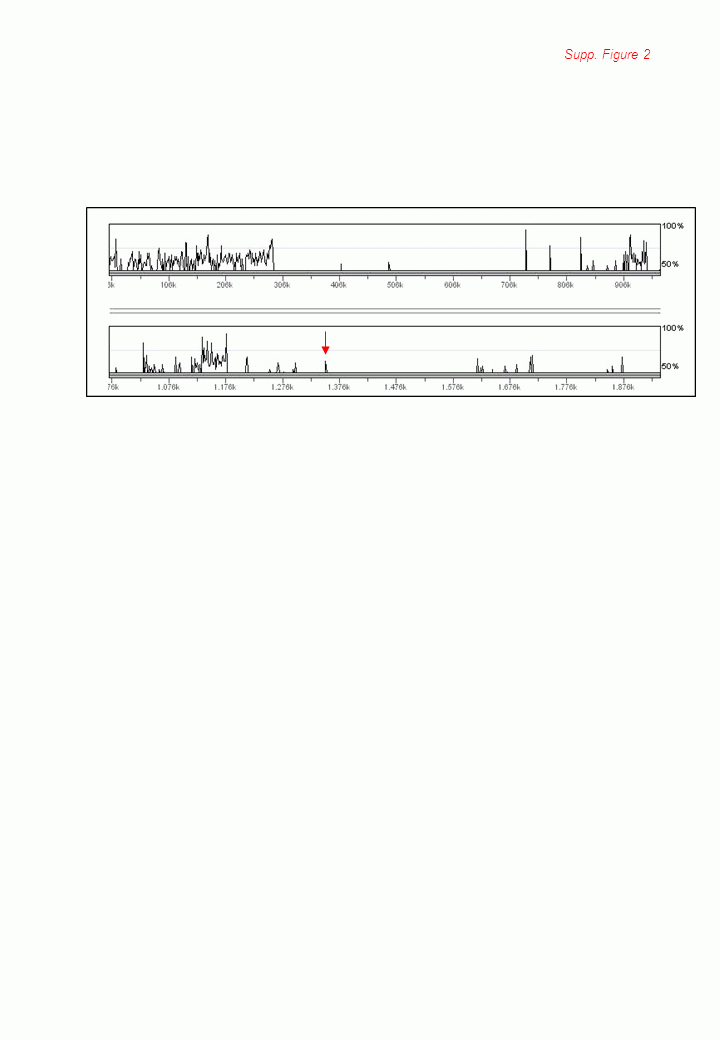

Supplement: Supplementary file 1 [file 1 › 000435871_sm_Figure_2.gif]

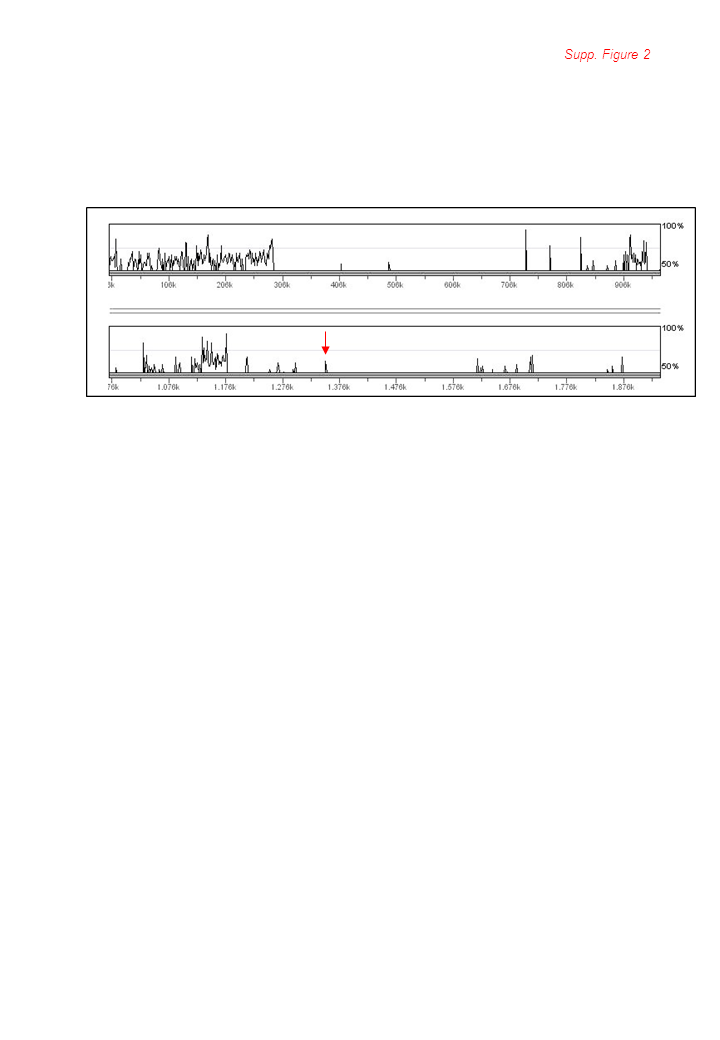

Supplement: Supplementary file 1 [file 1 › 000435871_sm_Figure_2.tif]

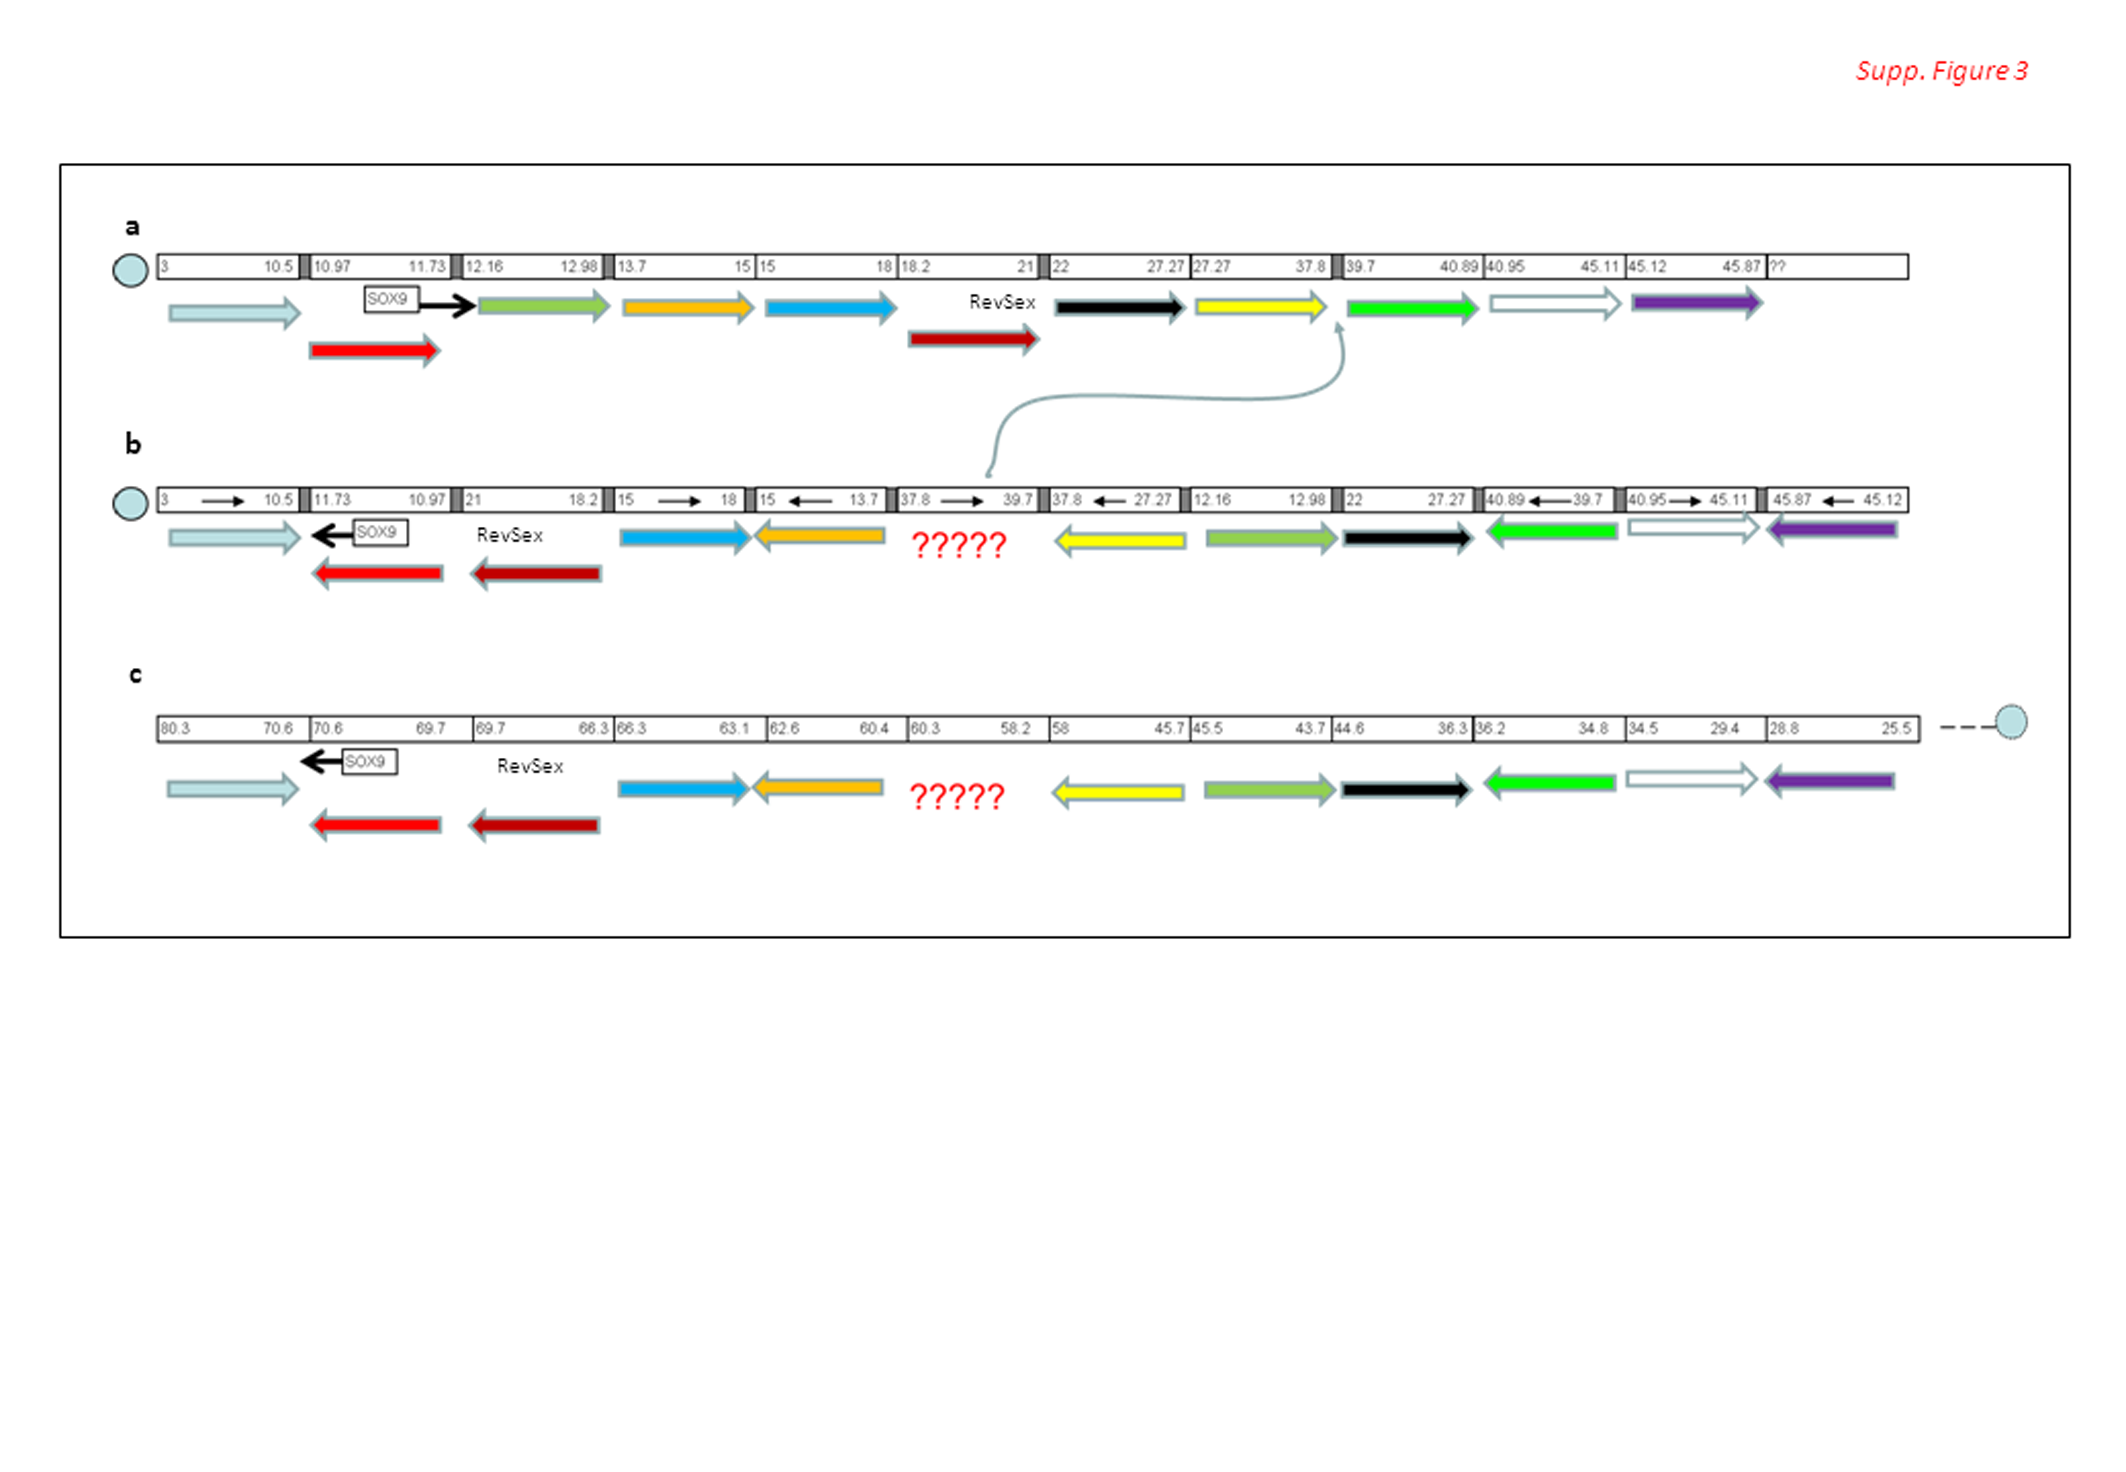

Supplement: Supplementary file 1 [file 1 › 000435871_sm_Figure_3.tif]
